# Supplementary material for: Global, regional and national burden of traumatic brain injury and spinal cord injury, 1990–2019: a systematic analysis for the Global Burden of Disease Study 2019
Source: PubMed Central journal article supplement — BMJ Open. 2023 Oct 6;13(10):e075049. doi: 10.1136/bmjopen-2023-075049 (PMC10565269; doi:10.1136/bmjopen-2023-075049), 2023-10-06
Supplement: bmjopen-2023-075049.draft_revisions.pdf [file bmjopen-2023-075049.draft_revisions.pdf]

# BMJ Open

BMJ Open is committed to open peer review. As part of this commitment we make the peer review history of every article we publish publicly available.

When an article is published we post the peer reviewers' comments and the authors' responses online. We also post the versions of the paper that were used during peer review. These are the versions that the peer review comments apply to.

The versions of the paper that follow are the versions that were submitted during the peer review process. They are not the versions of record or the final published versions. They should not be cited or distributed as the published version of this manuscript.

BMJ Open is an open access journal and the full, final, typeset and author-corrected version of record of the manuscript is available on our site with no access controls, subscription charges or pay-per-view fees (<http://bmjopen.bmj.com>).

If you have any questions on BMJ Open's open peer review process please email [info.bmjopen@bmj.com](mailto:info.bmjopen@bmj.com)

# BMJ Open

## Global, regional, and national burden of traumatic brain injury and spinal cord injury, 1990–2019: a systematic analysis for the Global Burden of Disease Study 2019

|                               |                                                                                                                                                                                                                                                                                                                                                          |
|-------------------------------|----------------------------------------------------------------------------------------------------------------------------------------------------------------------------------------------------------------------------------------------------------------------------------------------------------------------------------------------------------|
| Journal:                      | <i>BMJ Open</i>                                                                                                                                                                                                                                                                                                                                          |
| Manuscript ID                 | bmjopen-2023-075049                                                                                                                                                                                                                                                                                                                                      |
| Article Type:                 | Original research                                                                                                                                                                                                                                                                                                                                        |
| Date Submitted by the Author: | 25-Apr-2023                                                                                                                                                                                                                                                                                                                                              |
| Complete List of Authors:     | Guan, Bin; Shandong University, Department of Orthopaedics<br>Anderson, David; The University of Sydney, school of health sciences<br>Chen, Lingxiao; The University of Sydney Institute of Bone and Joint Research<br>Feng, Shiqing; Shandong University, Department of Orthopaedics<br>Zhou, Hengxing; Shandong University, Department of Orthopaedics |
| Keywords:                     | EPIDEMIOLOGY, NEUROLOGY, ORTHOPAEDIC & TRAUMA SURGERY, PUBLIC HEALTH                                                                                                                                                                                                                                                                                     |
|                               |                                                                                                                                                                                                                                                                                                                                                          |

SCHOLARONE™  
Manuscripts

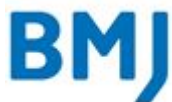

I, the Submitting Author has the right to grant and does grant on behalf of all authors of the Work (as defined in the below author licence), an exclusive licence and/or a non-exclusive licence for contributions from authors who are: i) UK Crown employees; ii) where BMJ has agreed a CC-BY licence shall apply, and/or iii) in accordance with the terms applicable for US Federal Government officers or employees acting as part of their official duties; on a worldwide, perpetual, irrevocable, royalty-free basis to BMJ Publishing Group Ltd ("BMJ") its licensees and where the relevant Journal is co-owned by BMJ to the co-owners of the Journal, to publish the Work in this journal and any other BMJ products and to exploit all rights, as set out in our [licence](#).

The Submitting Author accepts and understands that any supply made under these terms is made by BMJ to the Submitting Author unless you are acting as an employee on behalf of your employer or a postgraduate student of an affiliated institution which is paying any applicable article publishing charge ("APC") for Open Access articles. Where the Submitting Author wishes to make the Work available on an Open Access basis (and intends to pay the relevant APC), the terms of reuse of such Open Access shall be governed by a Creative Commons licence – details of these licences and which [Creative Commons](#) licence will apply to this Work are set out in our licence referred to above.

Other than as permitted in any relevant BMJ Author's Self Archiving Policies, I confirm this Work has not been accepted for publication elsewhere, is not being considered for publication elsewhere and does not duplicate material already published. I confirm all authors consent to publication of this Work and authorise the granting of this licence.

1  
2  
3 **1 Global, regional, and national burden of traumatic brain injury and spinal cord injury,**  
4  
5 **2 1990–2019: a systematic analysis for the Global Burden of Disease Study 2019**  
6  
7  
8  
9

10  
11 4 Bin Guan MBBS<sup>1\*</sup>, David B. Anderson PhD<sup>2\*</sup>, Lingxiao Chen PhD<sup>3c†</sup>, Shiqing Feng MD<sup>4b†</sup>,  
12  
13 5 Hengxing Zhou MD<sup>1a†</sup>  
14  
15  
16  
17

18  
19 7 <sup>1</sup>Department of Orthopaedics, Qilu Hospital of Shandong University, Shandong University  
20  
21 8 Centre for Orthopaedics, Advanced Medical Research Institute, Cheeloo College of Medicine,  
22  
23 9 Shandong University, Jinan, Shandong, 250012, P.R. China.  
24  
25

26  
27 10 <sup>2</sup>School of Health Sciences, Faculty of Medicine and Health, University of Sydney, New  
28  
29 11 South Wales, Australia.  
30

31  
32 12 <sup>3</sup>Sydney Musculoskeletal Health, The Kolling Institute, Faculty of Medicine and Health,  
33  
34 13 University of Sydney, Sydney, NSW, Australia  
35

36  
37 14 <sup>4</sup>The Second Hospital of Shandong University, Cheeloo College of Medicine, Shandong  
38  
39 15 University, Jinan, Shandong, 250012, P.R. China.  
40  
41  
42  
43

44  
45 17 \*Bin Guan and David B. Anderson contributed equally to this work.  
46

47  
48 18 †Hengxing Zhou, Shiqing Feng, and Lingxiao Chen were designated as co-corresponding  
49  
50 19 authors.  
51

52  
53 20  
54  
55 21 <sup>a</sup>Email address for Hengxing Zhou: zhouhengxing@sdu.edu.cn  
56

57  
58 22 <sup>b</sup>Email address for Shiqing Feng: shiqingfeng@sdu.edu.cn  
59  
60

1  
2  
3  
4  
5  
6  
7  
8  
9  
10  
11  
12  
13  
14  
15  
16  
17  
18  
19  
20  
21  
22  
23  
24  
25  
26  
27  
28  
29  
30  
31  
32  
33  
34  
35  
36  
37  
38  
39  
40  
41  
42  
43  
44  
45  
46  
47  
48  
49  
50  
51  
52  
53  
54  
55  
56  
57  
58  
59  
60

23   <sup>e</sup>Email address for Lingxiao Chen: [lche4036@uni.sydney.edu.au](mailto:lche4036@uni.sydney.edu.au)

For peer review only

1  
2  
3 24 **Title**  
4  
5  
6 25  
7

8 26 Global, regional, and national burden of traumatic brain injury and spinal cord injury, 1990–  
9  
10 27 2019: a systematic analysis for the Global Burden of Disease Study 2019  
11  
12  
13 28

15  
16 29 **Abstract**  
17  
18 30

21 31 **Objectives:** To evaluate the most up-to-date burden of traumatic brain injury (TBI) and spinal  
22  
23 32 cord injury (SCI) and analyze their leading causes in different countries and territories.  
24  
25  
26 33

28  
29 34 **Design:** Cross-sectional.  
30  
31 35

33  
34 36 **Setting:** The epidemiologic data were gathered from the Global Burden of Disease (GBD)  
35  
36 37 Results Tool (January 1, 1990 to December 31, 2019) covering 21 GBD regions and 204  
37  
38 38 countries and territories.  
39  
40  
41 39

42  
43  
44 40 **Participants:** Patients with TBI and SCI.  
45  
46  
47 41

48  
49 42 **Main outcomes and measures:** Absolute numbers and age-standardized rates/estimates of  
50  
51 43 incidence, prevalence, and years lived with disability (YLDs) of TBI and SCI by location in  
52  
53 44 2019, with their percentage changes from 1990 to 2019. The most common causes (e.g., falls)  
54  
55 45 of TBI and SCI in 204 countries and territories.  
56  
57  
58  
59  
60

1  
2  
3 46  
4  
5 47 **Results:** Globally, in 2019, TBI had 27.16 million new cases, 48.99 million prevalent cases,  
6  
7  
8 48 and 7.08 million YLDs. Global age-standardized incidence rates of TBI decreased  
9  
10 49 significantly by -5.5% (95% uncertainty interval, -8.9% to -3.0%) from 1990 to 2019,  
11  
12  
13 50 whereas SCI had no significant change (-6.1% [-17.3% to 1.5%]). Regionally, in 2019,  
14  
15  
16 51 Eastern Europe had the highest burden of TBI. Nationally, in 2019, Slovenia and Afghanistan  
17  
18 52 had the highest age-standardized incidence rates of TBI and SCI, respectively. For TBI, falls  
19  
20  
21 53 was the leading cause in 74% (150/204) of countries and territories, followed by pedestrian  
22  
23  
24 54 road injuries (14%, 29/204), motor vehicle road injuries (5%, 11/204), and conflict and  
25  
26 55 terrorism (2%, 4/204). For SCI, falls was the leading cause in 97% (198/204) of countries and  
27  
28  
29 56 territories, followed by conflict and terrorism (3%, 6/204).

30  
31 57  
32  
33  
34 58 **Conclusions:** Global age-standardized incidence rates of TBI have decreased significantly  
35  
36 59 since 1990, whereas SCI had no significant change. The leading causes of TBI and SCI  
37  
38  
39 60 globally were falls, but variations did exist between countries and territories. Policymakers  
40  
41  
42 61 should continue to prioritize interventions to reduce falls, but priorities may vary between  
43  
44 62 countries and territories.

45  
46  
47 63

48  
49 64 **Strengths and limitations of this study**

50  
51  
52 65  
53  
54  
55  
56  
57  
58  
59  
60

- 1  
2  
3 66 ● The 2019 iteration of the GBD study was the most up-to-date and superseded all previous  
4  
5 67 iterations. Therefore, one of the strengths of this study was that it provided the most up-  
6  
7  
8 68 to-date global, regional, and national burden of TBI and SCI from 1990 to 2019.  
9  
10  
11 69  
12  
13  
14 70 ● Previous studies analysed the leading cause of TBI and SCI at the regional level, which  
15  
16 71 prevented policymakers from identifying variations that can exist between countries and  
17  
18 72 territories within a same region. Therefore, another strength of this study was that it  
19  
20 73 presented the variations of leading causes in 204 different countries and territories, which  
21  
22 74 have not been assessed before.  
23  
24  
25  
26  
27 75  
28  
29  
30  
31 76 ● One of the limitations was that the results of some data-sparse countries and territories  
32  
33 77 should be interpreted carefully because estimates in some data-sparse countries and  
34  
35 78 territories were modelled and predicted by borrowing estimates from data-rich countries  
36  
37 79 and territories.  
38  
39  
40  
41  
42 80  
43  
44  
45 81 ● The second limitation was that the data sources relied on patients having medical records,  
46  
47 82 which may have underestimated the burden of some conditions.  
48  
49  
50  
51 83  
52  
53  
54 84 ● The third limitation was that SCI would be matched to the individual who experience  
55  
56 85 both TBI and SCI according to the GBD severity hierarchy, which may cause some  
57  
58 86 underestimation of the burden of TBI.  
59  
60



87

**88 Introduction**

89

90 Traumatic brain injury (TBI) and spinal cord injury (SCI) continue to pose challenges to the  
91 global public health systems, and the resulting disabilities have brought huge economic  
92 burden to patients, public health systems, and societies [1, 2]. Compared with the previous  
93 Global Burden of Disease (GBD) 2016 study [3, 4], new available data sources and improved  
94 statistical methods in the GBD 2019 study led to the GBD 2019 results superseding those  
95 from previous rounds of GBD [5]. Besides, nine additional countries and territories were  
96 firstly incorporated in the calculation of disease burden in the GBD 2019 study [5]. An update  
97 on the 2016 results of the burden of TBI and SCI is therefore warranted.

98

99 Ding et al. reported the burden of SCI at the global and regional levels through the GBD 2019  
100 data, but did not mention the burden of SCI in individual countries and territories [6].  
101 However, it will not allow for identifying variations that can exist between countries and  
102 territories within a same world or a same region, which may bring biased information to  
103 health care professionals. Take the previous GBD 2016 study as an example, the leading  
104 cause of TBI in the region, North Africa and Middle East, was concluded to be falls [4]. It  
105 was true in Saudi Arabia, whereas it did not reflect the reality in other countries and territories  
106 within North Africa and Middle East, such as, Afghanistan, where conflict and terrorism was  
107 the leading cause of TBI [4]. Failure to present the data in individual countries and territories  
108 can prevent health care professionals from identifying which causes should be targeted;

1  
2  
3 109 wasting resources and reducing effectiveness of any interventions [7].  
4  
5  
6 110  
7

8 111 Therefore, in this study, we aimed to provide the most up-to-date burden of TBI and SCI  
9  
10 112 through the GBD 2019 data. Also, we analyzed the leading causes of TBI and SCI in 204  
11  
12 113 individual countries and territories. Finally, the relationship between the burden of TBI and  
13  
14 114 SCI and Socio-demographic Index (SDI) in 204 countries and territories was explored.  
15  
16 115

## 17 18 19 20 21 116 **Methods** 22

### 23 24 117 25 26 118 **Overview** 27

28  
29 119  
30  
31 120 This study of global health estimates followed the Guidelines for Accurate and Transparent  
32  
33 121 Health Estimates Reporting (GATHER) Statement and the Strengthening the Reporting of  
34  
35 122 Observational Studies in Epidemiology (STROBE) Statement [8, 9]. The Global Burden of  
36  
37 123 Disease (GBD) 2019 study estimated burden of 369 diseases and injuries and 87 risk factors  
38  
39 124 through multiple epidemiological measures, including incidence, prevalence, mortality, years  
40  
41 125 of life lost (YLLs), years lived with disability (YLDs), and disability-adjusted life years  
42  
43 126 (DALYs) by age, sex, cause, year, and location from 1990 to 2019 [5]. Our methods used for  
44  
45 127 estimation of the burden of traumatic brain injury (TBI) and spinal cord injury (SCI) were  
46  
47 128 based on the framework of the GBD 2019 study, which had already been described  
48  
49 129 comprehensively elsewhere [5, 10].  
50  
51  
52  
53  
54  
55  
56  
57  
58  
59  
60

## 131 Case Definitions

132

133 Based on the framework of the GBD 2019 study [5], the definitions of TBI and SCI in this  
134 study relied on the International Classification of Diseases, Ninth Revision (ICD-9) and the  
135 International Classification of Diseases, Tenth Revision (ICD-10), which had also been  
136 described in details in the previous GBD 2016 study published in The Lancet Neurology [4].  
137 Additionally, a clarification from the GBD 2019 study is that TBI and SCI are both defined as  
138 a nature-of-injury but not a cause-of-injury [5]. For example, TBI and SCI could be caused by  
139 a fall, the fall was therefore defined as a cause-of-injury and TBI and SCI as a nature-of-  
140 injury. Although TBI and SCI could cause death, they were not defined as a cause-of-death in  
141 the GBD 2019 study [5]. Therefore, in this study, we provided the burden of TBI and SCI by  
142 incidence, prevalence, and YLDs, but not mortality or YLLs.

143

## 144 Data Source

145

146 The data for 21 GBD regions and 204 countries and territories between January 1, 1990, and  
147 December 31, 2019, were available from the GBD Results Tool  
148 (<https://vizhub.healthdata.org/gbd-results/>). The data utilized in this study were from patients  
149 who required medical care and received a diagnosis code, which included patients warranting  
150 inpatient care (referring to patients with sufficient severity to require overnight  
151 hospitalization) and patients warranting outpatient care (referring to patients treated in  
152 outpatient or emergency department) [5]. Additionally, considering that there are variations in

1  
2  
3 153 quality of data by each country and territory, estimates in some data-sparse countries and  
4  
5 154 territories were modelled and predicted by borrowing estimates from data-rich countries and  
6  
7  
8 155 territories [5]. More details of the data sources and model strategies have been published  
9  
10  
11 156 elsewhere [5, 10].  
12

13  
14  
15 157

### 16 158 **Calculation of Incidence, Prevalence, and Years Lived with Disability**

17  
18  
19 159

20  
21 160 The features of data processing used to calculate incidence, prevalence, and YLDs in this  
22  
23  
24 161 study were consistent with the framework of the GBD 2019 study [5]. First, the data inputs of  
25  
26 162 different cause-of-injury were incorporated and modelled by a Bayesian meta-regression tool,  
27  
28  
29 163 DisMod-MR 2.1, to infer the incidence of each cause-of-injury. Second, the GBD severity  
30  
31 164 hierarchy for nature-of-injury (**eTable 1**) was utilized to establish a point-to-point relationship  
32  
33  
34 165 between cause-of-injury and nature-of-injury, which means that when multiple nature-of-  
35  
36 166 injuries were caused by one cause-of-injury, nature-of-injury with the highest rank in the  
37  
38  
39 167 GBD severity hierarchy was selected to match it. Based on the framework of the GBD 2019  
40  
41  
42 168 study [5], because SCI had a higher rank in the GBD severity hierarchy than TBI, SCI was  
43  
44  
45 169 chosen if both conditions happened to an individual in our study, which was also consistent  
46  
47 170 with the calculation process of the previous GBD 2016 study published in The Lancet  
48  
49  
50 171 Neurology [4]. Third, for the short-term disability (the duration was less than one year), the  
51  
52 172 prevalence was approximately calculated as the incidence multiplied by the average duration.  
53  
54  
55 173 For the long-term disability (the duration was more than one year), DisMod-MR 2.1 was  
56  
57 174 utilized to convert incidence to prevalence. Fourth, the GBD disability weights (**eTable 2**)  
58  
59  
60

1  
2  
3 175 were utilized to calculate YLDs. The GBD disability weights were evaluated on a 0–1 scale,  
4  
5 176 with 0 representing complete health and 1 representing death [11]. For the short-term  
6  
7  
8 177 disability, YLDs were calculated as the prevalence multiplied by the GBD disability weights.  
9  
10  
11 178 For the long-term disability, YLDs were calculated with the similar process but adjusted by  
12  
13 179 comorbidity correction. Finally, the incidence, prevalence, and YLDs were aggregated to  
14  
15  
16 180 calculate the all-cause incidence, prevalence, and YLDs of TBI and SCI. Due to some  
17  
18 181 sampling errors and non-sampling variances, we calculated the 95% uncertainty interval (UI)  
19  
20  
21 182 using the same methods described previously in the GBD 2019 study [5]. Generally, UI were  
22  
23  
24 183 from 1,000 draw-level estimates for each parameter, and 95% UI were defined by the 25<sup>th</sup> and  
25  
26 184 975<sup>th</sup> values of the ordered 1,000 estimates.

185

## 186 **Statistical Analysis**

187

188 Firstly, according to the GBD location hierarchy (**eTable 3**) in the GBD 2019 study [5], we  
189 calculated absolute numbers and age-standardized rates/estimates of incidence, prevalence,  
190 and YLD of TBI and SCI in 21 GBD regions and 204 countries and territories in 2019. The  
191 age-standardized rate/estimate is calculated by  $\frac{\sum_{i=1}^A a_i w_i}{\sum_{i=1}^A w_i}$ , where  $a_i$  is the age-specific  
192 rate/estimate of the age group  $i$ , and  $w_i$  is the weight of the age group  $i$  derived from the GBD  
193 2019 world population standard (**eTable 4**) [12]. Secondly, based on the framework of the  
194 GBD 2019 study [5], we used percentage changes of age-standardized rates/estimates of  
195 incidence, prevalence, and YLD to calculate trends in the burden of TBI and SCI from 1990  
196 to 2019. If the 95% UI of a percentage change did not include zero, it was determined to be a

1  
2  
3 197 significant change, and vice versa [13]. Thirdly, according to the GBD cause hierarchy  
4  
5 198 (**eTable 5**) in the GBD 2019 study [5], we analyzed the most common causes (e.g., falls,  
6  
7  
8 199 pedestrian road injuries, motor vehicle road injuries, conflict and terrorism, etc.) for age-  
9  
10 200 standardized incidence rates of TBI and SCI in 204 countries and territories in 2019, and we  
11  
12  
13 201 also analyzed trends in age-standardized incidence rates of TBI and SCI caused by the most  
14  
15  
16 202 common causes in the corresponding countries and territories from 1990 to 2019 (except three  
17  
18 203 causes: conflict and terrorism, exposure to forces of nature, and executions and police  
19  
20  
21 204 conflict, which were considered as fatal discontinuities and defined as random events due to  
22  
23  
24 205 not having predictable time trends in the GBD 2019 study [5]). More details about definitions  
25  
26 206 of causes and corresponding ICD-9/ICD-10 codes had already been described elsewhere [5].  
27  
28  
29 207 Fourthly, based on one prior GBD study by GBD 2019 Fracture Collaborators [14], we  
30  
31 208 reported the top three countries and territories with age-standardized incidence rates caused  
32  
33  
34 209 by each cause, and the top three countries and territories with both the largest increase and the  
35  
36 210 largest decrease to explore potential reasons for their cause-specific disease burden. Finally,  
37  
38  
39 211 considering that the data was non-normal distributed (Shapiro-Wilk test had a p-value equal  
40  
41  
42 212 to  $<0.001$ ), the associations between Socio-demographic Index (SDI, a composite indicator of  
43  
44 213 income per capita, years of schooling, and fertility rate; SDI ranges from 0 to 1 in the GBD  
45  
46  
47 214 2019 study, where 0 represents the lowest income per capita, the fewest years of schooling,  
48  
49  
50 215 and the highest fertility rate, and vice versa [5], **eTable 6**) and the age-standardized YLD rates  
51  
52 216 in 204 countries and territories in 2019 were analyzed by Spearman correlation tests to  
53  
54  
55 217 examine the effect of SDI on the disease burden [15-17]. All statistical analyses and figures  
56  
57 218 drawing were conducted in R program (version 4.1.3) and GraphPad Prism (version 7.0.0).  
58  
59  
60

1  
2  
3 219 Statistical significance was defined as two-tailed  $P < 0.05$ .

4  
5 220

6  
7  
8 221 **Patient and Public Involvement statement**

9  
10 222

11  
12  
13 223 The data used in this study was publicly available and did not contain any independently  
14  
15 224 identifiable information. Therefore, no ethical approval or patient consent was required for  
16  
17  
18 225 this study.

19  
20  
21 226

22  
23 227 **Results**

24  
25  
26 228

27  
28  
29 229 **Global, Regional, and National Disease Burden**

30  
31 230

32  
33  
34 231 Globally, traumatic brain injury (TBI) had 27.16 (95% uncertainty interval [UI], 23.36 to  
35  
36 232 31.42) million new cases, 48.99 (46.84 to 51.32) million prevalent cases, and 7.08 (5.00 to  
37  
38 233 9.59) million years lived with disability (YLDs) in 2019 (**Table 1; eTable 7**). There were 346  
39  
40 234 (95% UI, 298 to 401) cases per 100,000 population, 599 (573 to 627) cases per 100,000  
41  
42 235 population, and 87 (61 to 117) YLDs per 100,000 population for age-standardized incidence  
43  
44 236 rates, age-standardized prevalence estimates, and age-standardized YLD rates of TBI in 2019,  
45  
46  
47 237 respectively. Global age-standardized incidence rates of TBI decreased significantly by -5.5%  
48  
49 238 (95% UI, -8.9% to -3.0%) from 1990 to 2019 (**eTable 8**). By contrast, there was no  
50  
51  
52 239 significant change in global age-standardized incidence rates of spinal cord injury (SCI, -6.1%  
53  
54  
55 240 [-17.3% to 1.5%]) from 1990 to 2019 (**Table 2; eTables 9-10**). Global absolute numbers and  
56  
57  
58  
59  
60

1  
2  
3 241 age-standardized rates/estimates of incidence, prevalence, and YLD of SCI can be found in  
4  
5 242 Ding et al [6].  
6  
7

8 243  
9  
10 244 Regionally, Eastern Europe had the largest age-standardized incidence rates (737 [633 to 857]  
11  
12 245 cases per 100,000 population), age-standardized prevalence estimates (1312 [1240 to 1393]  
13  
14 246 cases per 100,000 population), and age-standardized YLD rates (193 [136 to 261] YLDs per  
15  
16 247 100,000 population) of TBI in 2019. Regional burden of SCI has been described by Ding et al  
17  
18 248 [6].  
19  
20  
21  
22

23 249  
24  
25 250 Nationally, for TBI, Slovenia had the largest age-standardized incidence rates (885 [768 to  
26  
27 251 1036] cases per 100,000 population), age-standardized prevalence estimates (1521 [1448 to  
28  
29 252 1595] cases per 100,000 population), and age-standardized YLD rates (223 [157 to 303]  
30  
31 253 YLDs per 100,000 population) in 2019 (**Figure 1; eFigures 1-3**). For SCI, Afghanistan had  
32  
33 254 the largest age-standardized incidence rates (44 [12 to 132] cases per 100,000 population),  
34  
35 255 and Syrian Arab Republic had the largest age-standardized prevalence estimates (1049 [333 to  
36  
37 256 2942] cases per 100,000 population) and age-standardized YLD rates (403 [113 to 1150]  
38  
39 257 YLDs per 100,000 population) in 2019 (**Figure 1; eFigures 4-6**).  
40  
41  
42  
43  
44  
45  
46

47 258

### 48 49 259 **Leading Causes by Country and Territory**

50  
51  
52 260

53  
54  
55 261 Considering the cause-specific age-standardized incidence rates of TBI in 2019, falls was the  
56  
57 262 most common cause in 74% (150/204) of countries and territories, followed by pedestrian  
58  
59  
60



1  
2  
3 263 road injuries (14%, 29/204), motor vehicle road injuries (5%, 11/204), and conflict and  
4  
5 264 terrorism (2%, 4/204) (**Figure 2; eTable 11**). The top three countries and territories with age-  
6  
7  
8 265 standardized incidence rates by falls were Finland (418 [324 to 539] cases per 100,000  
9  
10 266 population), Slovenia (401 [320 to 504] cases per 100,000 population), and Croatia (400 [318  
11  
12  
13 267 to 501] cases per 100,000 population) (out of 150 countries and territories), by pedestrian road  
14  
15  
16 268 injuries were Mozambique (103 [76 to 134] cases per 100,000 population), Ghana (83 [61 to  
17  
18 269 109] cases per 100,000 population), and Guinea-Bissau (71 [50 to 95] cases per 100,000  
19  
20  
21 270 population) (out of 29 countries and territories), by motor vehicle road injuries were Comoros  
22  
23  
24 271 (86 [61 to 117] cases per 100,000 population), Mauritania (79 [56 to 109] cases per 100,000  
25  
26 272 population), and Cameroon (75 [52 to 103] cases per 100,000 population) (out of 11 countries  
27  
28  
29 273 and territories), and by conflict and terrorism were Afghanistan (356 [134 to 798] cases per  
30  
31 274 100,000 population), Yemen (256 [103 to 590] cases per 100,000 population), and Syrian  
32  
33  
34 275 Arab Republic (180 [68 to 394] cases per 100,000 population) (out of 4 countries and  
35  
36 276 territories) (**Figure 3**).

37  
38  
39 277  
40  
41  
42 278 By falls, the countries and territories with the top three largest increase in age-standardized  
43  
44 279 incidence rates of TBI from 1990 to 2019 were Turkey (100.3% [88.8% to 114.5%]), Bhutan  
45  
46  
47 280 (96.7% [86.9% to 108.0%]), and Cambodia (73.5% [67.6% to 79.9%]), and the top three  
48  
49  
50 281 decreasing rates were in Democratic People's Republic of Korea (-38.1% [-40.2% to -  
51  
52 282 35.8%]), Armenia (-35.1% [-41.2% to -28.4%]), and Latvia (-34.6% [-38.4% to -30.9%]) (out  
53  
54  
55 283 of 150 countries and territories). By pedestrian road injuries, the top three countries and  
56  
57 284 territories by increasing rates were Lesotho (49.5% [38.4% to 59.9%]), Cabo Verde (28.1%

1  
2  
3 285 [19.2% to 37.2%]), and Ghana (18.3% [11.2% to 26.6%]), and the top three countries and  
4  
5 286 territories by decreasing rates were Zimbabwe (-32.5% [-38.5% to -26.4%]), Rwanda (-30.3%  
6  
7  
8 287 [-34.9% to -25.3%]), and South Sudan (-19.2% [-24.3% to -13.9%]) (out of 29 countries and  
9  
10 288 territories). By motor vehicle road injuries, the countries and territories with the top three  
11  
12  
13 289 largest increase in rates were Dominican Republic (38.5% [24.0% to 54.6%]), Sao Tome and  
14  
15  
16 290 Principe (28.9% [20.0% to 38.6%]), and Seychelles (26.8% [15.3% to 39.3%]), and there  
17  
18 291 were only two countries and territories had a significant decrease in their rates: South Africa  
19  
20  
21 292 (-26.0% [-30.5% to -21.3%]) and Mauritania (-11.2% [-17.4% to -4.2%]) (amongst the 11  
22  
23  
24 293 included countries and territories).

25  
26 294

27  
28  
29 295 For SCI, falls was the most common cause for age-standardized incidence rates in 97%  
30  
31 296 (198/204) of countries and territories in 2019, followed by conflict and terrorism (3%, 6/204)  
32  
33  
34 297 (**eTable 12**). The top three countries and territories with age-standardized incidence rates by  
35  
36 298 falls were Greenland (23 [15 to 34] cases per 100,000 population), Norway (21 [14 to 33]  
37  
38  
39 299 cases per 100,000 population), and Sweden (19 [12 to 29] cases per 100,000 population) (out  
40  
41  
42 300 of 198 countries and territories), and by conflict and terrorism were Afghanistan (40 [8 to  
43  
44 301 128] cases per 100,000 population), Yemen (22 [5 to 66] cases per 100,000 population), and  
45  
46  
47 302 Syrian Arab Republic (21 [4 to 64] cases per 100,000 population) (out of 6 countries and  
48  
49  
50 303 territories).

51  
52 304

53  
54  
55 305 Regarding change rates in falls (as a cause of SCI) from 1990 to 2019, the countries and  
56  
57 306 territories with the largest increase in age-standardized incidence rates were Turkey (110.5%  
58  
59  
60

1  
2  
3 307 [97.3% to 125.4%]), Bhutan (101.1% [90.9% to 112.6%]), and Cambodia (76.5% [70.1% to  
4  
5 308 83.1%]), and the top largest declines were in Democratic People's Republic of Korea (-37.2%  
6  
7  
8 309 [-39.3% to -34.9%]), Latvia (-34.5% [-37.9% to -31.0%]), and Armenia (-33.9% [-39.3% to -  
9  
10 310 27.9%]) (out of 198 countries and territories).

311

### 312 **Disease Burden by Socio-demographic Index**

313

314 Generally, a positive association was found between age-standardized YLD rates of TBI and  
315 Socio-demographic Index (SDI) in 204 countries and territories in 2019 ( $\rho=0.42$ ,  $P<.001$ )  
316 (**eFigure 7**). The observed rates higher than the expected were found not only in countries and  
317 territories with higher SDI, such as Australia, but also in countries and territories with lower  
318 SDI, such as Afghanistan. SCI on the other hand, had no statistical association with SDI ( $\rho=-$   
319  $0.05$ ,  $P=0.49$ ), although the SCI burden in a few countries and territories, such as Afghanistan,  
320 far exceeded those of others.

321

### 322 **Discussion**

323

324 This study provided the most up-to-date burden of TBI and SCI through the GBD 2019 data.  
325 It also presented the variations between the leading causes of TBI and SCI in 204 individual  
326 countries and territories. Besides, the associations between national SDI and the burden of  
327 TBI and SCI were explored.

328

1  
2  
3 329 Globally, we found that the age-standardized incidence rates of TBI had a significant decrease  
4  
5 330 since 1990. This may reflect the benefits of global initiatives to reduce rates of TBI. Major  
6  
7  
8 331 efforts have included a focus on road safety and reduced road related injuries, a leading cause  
9  
10 332 of TBI globally [18]. One example, was in 2004, when the United Nations General Assembly  
11  
12  
13 333 and World Health Organization passed resolutions which called on preventive measures  
14  
15  
16 334 against road injuries [19]. The resolutions were championed in many countries and territories  
17  
18 335 successively, including Oman, Russia, and Sweden [19]. When looking at Oman, Russia, and  
19  
20  
21 336 Sweden, their age-standardized incidence rates of TBI decreased significantly with percentage  
22  
23  
24 337 changes of -7.2% (-11.9% to -2.0%), -20.3% (-22.5% to -17.9%), and -9.8% (-13.6% to -  
25  
26 338 5.4%) from 1990 to 2019, respectively, demonstrating effectiveness of their interventions.  
27  
28  
29 339 Unfortunately, despite the significant decreases observed in TBI, the global age-standardized  
30  
31 340 incidence rates of SCI had no significant change. However, this is different from Ding et al.'s  
32  
33  
34 341 conclusion that the global age-standardized incidence rates of SCI had decreased since 1990,  
35  
36 342 with an estimated annual percentage change (EAPC) of -0.08 (95% UI, -0.24 to 0.09) [6].  
37  
38  
39 343 This misinterpretation of the statistical result neglecting uncertainty intervals and focusing  
40  
41 344 only on point estimates may cause confusions and bring biased information to health care  
42  
43  
44 345 professionals [20]. In this study, the insignificant change in the global age-standardized  
45  
46  
47 346 incidence rates of SCI may be related to motor vehicle accidents not being a major cause of  
48  
49  
50 347 SCI, in the same way it is for TBI [21, 22]. Health care professionals should therefore  
51  
52 348 prioritize falls reduction in attempts to reduce the rates of SCI and TBI.  
53  
54  
55 349

1  
2  
3 350 One challenge in any global effort to reduce falls is the ageing population, with 9.1% of the  
4  
5 351 global population over the age of 65 in 2019, compared with 6.2% in 1990 [23]. Falls are  
6  
7  
8 352 more common in the elderly, owing to sarcopenia, osteoporosis, sleeping disturbance,  
9  
10 353 multimorbidity, and frailty [13]. In countries and territories with high age-standardized  
11  
12  
13 354 incidence rates of TBI and SCI by falls, such as, Finland, Slovenia, Croatia, Norway, and  
14  
15  
16 355 Sweden, the percentages of the population over the age of 65 were 22.1%, 20.2%, 20.9%,  
17  
18 356 17.3%, and 20.2% in 2019, respectively, far exceeding the world average (9.1%) [23].  
19  
20  
21 357 Additional challenges to falls reduction is not just the ageing population, but the increased  
22  
23  
24 358 global life expectancy at birth from 65.4 years in 1990 to 73.5 years in 2019 [12]. With an  
25  
26 359 older population, that is living longer, falls is likely to remain a high-priority area for health  
27  
28  
29 360 care professionals [24]. Although some components of falls are modifiable, some countries  
30  
31  
32 361 and territories have unique challenges, due to their geographical features. Finland, Norway,  
33  
34 362 and Sweden for example, all have cold climates and unique environmental risk factors (i.e.,  
35  
36 363 icy sidewalks), which may increase their populations chances of a fall [25, 26]. In these  
37  
38  
39 364 countries and territories, increased focus on environmental risks may need to be prioritized,  
40  
41  
42 365 particularly as their population continue to age.

43  
44 366  
45  
46  
47 367 Looking at changes in age-standardized incidence rates by falls, Turkey had the largest  
48  
49  
50 368 increase (TBI: 100.3% [88.8% to 114.5%], SCI: 110.5% [97.3% to 125.4%]), but Armenia  
51  
52 369 had a significant decrease in both TBI (-35.1% [-41.2% to -28.4%]) and SCI (-33.9% [-39.3%  
53  
54 370 to -27.9%]) from 1990 to 2019. The reasons for this change were unknown, but may be  
55  
56  
57 371 related to changes in resource allocation. In Armenia, increases from \$2.26 billion in 1990 to  
58  
59  
60

1  
2  
3 372 \$13.86 billion in 2019 in its Gross Domestic Product (GDP, current US\$) have led to its  
4  
5 373 increased spending on healthcare so that it may improve public healthcare education [27-29].  
6  
7  
8 374 By contrast, Turkey has faced economic difficulty in recent years, with its GDP decreasing  
9  
10 375 from \$957.78 billion in 2013 to \$761 billion in 2019, which may have contributed to the  
11  
12  
13 376 significant increase in identified in this study [29].  
14  
15

16 377

17  
18 378 Road injuries was found to be the leading cause of TBI in 20% (40/204) of countries and  
19  
20  
21 379 territories, with a higher prevalence identified in African countries and territories. One  
22  
23  
24 380 possible reason for the high prevalence in Africa may be the combination of a rapid increase  
25  
26 381 in motor vehicle ownership [30], without sufficient road infrastructure to support it (i.e., roads  
27  
28 382 and traffic safety) [31-34]. In African countries and territories, such as Mozambique, a  
29  
30  
31 383 previous study found concerns with non-adherence to traffic regulations, poorly maintained  
32  
33  
34 384 roads, inadequate traffic signage, and a lack of pedestrian protections as possible reasons  
35  
36 385 behind Mozambique's high age-standardized incidence rates of TBI [35]. A lack of sufficient  
37  
38  
39 386 safety around motor vehicles is not limited to Africa however, with the Dominican Republic  
40  
41  
42 387 also recording a high age-standardized incidence rates of TBI, and this was also attributed to  
43  
44 388 traffic safety, although the reasons were reported as high rates of people driving while  
45  
46  
47 389 intoxicated, and limited policing of traffic violations [36]. The high burden of TBI by road  
48  
49  
50 390 injuries in these countries and territories demonstrates that despite some countries and  
51  
52 391 territories having successfully reduced their road injuries, challenges remain in others.  
53  
54  
55 392 Furthermore, the variations in causes and rates of TBI identified in this study suggest that  
56  
57 393 global initiatives to reducing rates of motor vehicle accidents or TBI need to consider the  
58  
59  
60

394 unique challenges faced by each country and territory, rather than a generalist approach to rate  
395 reduction [19].

396

397 Finally, conflict and terrorism was the most common cause of TBI and SCI in 2% (4/204) and  
398 3% (6/204) of countries and territories, respectively, such as Afghanistan, Yemen, and Syrian  
399 Arab Republic, which are likely attributable to the on-going armed conflicts that have  
400 occurred in these countries and territories over many years [37-39]. It also suggests the  
401 importance of an appeal for peace in these war-torn countries and territories.

402

403 This study had some strengths. Firstly, it provided the most up-to-date global, regional, and  
404 national burden of TBI and SCI from 1990 to 2019. The findings can help health care  
405 professionals acquire the most up-to-date epidemiological characteristics of TBI and SCI in  
406 21 GBD regions and 204 countries/territories. Secondly, it presented the variations of leading  
407 causes in 204 different countries and territories, which can help health care professionals  
408 identify which causes should be targeted in different countries/territories to improve the  
409 effectiveness of preventive interventions.

410

411 This study also had similar limitations to other GBD studies. Firstly, the results of some data-  
412 sparse countries and territories (e.g., Democratic People's Republic of Korea, Bhutan, etc.)  
413 should be interpreted carefully. In the future, we hope that more comprehensive  
414 epidemiological data will be available for these countries and territories, to help improve  
415 confidence in the results. Secondly, the data sources relied on patients having medical

1  
2  
3 416 records, which may have underestimated the burden of some conditions. In mild TBI for  
4  
5 417 example, some patients may not seek medical help, and would therefore not be included in  
6  
7  
8 418 overall rates of TBI. Thirdly, some patients can experience both TBI and SCI from a  
9  
10 419 traumatic event, because SCI had a higher rank than TBI in the GBD severity hierarchy that  
11  
12  
13 420 we utilized in this study, SCI would be matched to the individual, which may cause some  
14  
15  
16 421 underestimation of the burden of TBI. Finally, the GBD study did not link risk factors, such  
17  
18 422 as behavioral factors (e.g., speeding, alcohol use, etc.), with TBI and SCI [40], so we were  
19  
20  
21 423 unable to assess any associations between the two. In the future, we hope that the GBD study  
22  
23  
24 424 will include this information, to help provide more detailed results on the causes of TBI and  
25  
26 425 SCI and in-turn allow for more targeted preventative strategies [41].  
27  
28  
29 426

## 30 31 427 **Conclusions** 32 33 34 428

35  
36 429 In conclusion, we found that global age-standardized incidence rates of TBI had a significant  
37  
38  
39 430 decrease since 1990, whereas SCI had no significant change. Falls was the leading cause of  
40  
41  
42 431 TBI and SCI in 74% (150/204) and 97% (198/204) of countries and territories, respectively,  
43  
44  
45 432 but the variations of leading causes of TBI and SCI did exist between countries and territories,  
46  
47 433 even within a same geographic region. Although declining, high burden of TBI remained a  
48  
49  
50 434 concern in both higher and lower SDI countries and territories. High burden of SCI from falls  
51  
52 435 in almost all countries and territories demonstrates the need for falls reduction to be a global  
53  
54  
55 436 priority now and into the future, but priorities may vary between countries and territories.  
56  
57  
58 437



1  
2  
3 438 **Availability of Data and Materials**

4  
5 439

6  
7  
8 440 The raw data were available from the GBD Results Tool (<https://vizhub.healthdata.org/gbd->  
9  
10 441 [results/](https://vizhub.healthdata.org/gbd-)) and the supplementary materials.

11  
12  
13 442

14  
15  
16 443 **Competing Interests**

17  
18 444

19  
20  
21 445 The authors declare that they have no conflict of interest.

22  
23 446

24  
25  
26 447 **Funding**

27  
28 448

29  
30  
31 449 This study was funded by Taishan Scholars Program of Shandong Province-Young Taishan  
32  
33 450 Scholars (tsqn201909197).

34  
35 451

36  
37  
38  
39 452 **Authors' Contributions**

40  
41  
42 453

43  
44 454 H.Z., S.F., and L.C. contributed to the conception and design of the study. B.G. and D.B.A.  
45  
46  
47 455 contributed to the acquisition, analysis, and interpretation of data. B.G. and D.B.A.  
48  
49 456 contributed to drafting the text or preparing the figures. All authors reviewed the manuscript.

50  
51  
52 457

53  
54  
55 458 **Acknowledgements**

56  
57 459  
58  
59  
60

1  
2  
3 460 We thank the Institute for Health Metrics and Evaluation at the University of Washington and  
4  
5 461 all collaborators involved in the GBD 2019 study to make the data accessible to the public.  
6  
7  
8  
9  
10  
11  
12  
13  
14  
15  
16  
17  
18  
19  
20  
21  
22  
23  
24  
25  
26  
27  
28  
29  
30  
31  
32  
33  
34  
35  
36  
37  
38  
39  
40  
41  
42  
43  
44  
45  
46  
47  
48  
49  
50  
51  
52  
53  
54  
55  
56  
57  
58  
59  
60

For peer review only

## References

1. Maas AI, Stocchetti N, Bullock R Moderate and severe traumatic brain injury in adults. *Lancet Neurol* 2008; 7:728-741. [https://doi.org/10.1016/s1474-4422\(08\)70164-9](https://doi.org/10.1016/s1474-4422(08)70164-9)
2. Ahuja CS, Wilson JR, Nori S, Kotter MRN, Druschel C, Curt A, Fehlings MG Traumatic spinal cord injury. *Nat Rev Dis Primers* 2017; 3:17018. <https://doi.org/10.1038/nrdp.2017.18>
3. GBD 2016 Disease and Injury Incidence and Prevalence Collaborators. Global, regional, and national incidence, prevalence, and years lived with disability for 328 diseases and injuries for 195 countries, 1990-2016: a systematic analysis for the Global Burden of Disease Study 2016. *Lancet* 2017; 390:1211-1259. [https://doi.org/10.1016/s0140-6736\(17\)32154-2](https://doi.org/10.1016/s0140-6736(17)32154-2)
4. GBD 2016 Traumatic Brain Injury and Spinal Cord Injury Collaborators. Global, regional, and national burden of traumatic brain injury and spinal cord injury, 1990-2016: a systematic analysis for the Global Burden of Disease Study 2016. *Lancet Neurol* 2019; 18:56-87. [https://doi.org/10.1016/s1474-4422\(18\)30415-0](https://doi.org/10.1016/s1474-4422(18)30415-0)
5. GBD 2019 Diseases and Injuries Collaborators. Global burden of 369 diseases and injuries in 204 countries and territories, 1990-2019: a systematic analysis for the Global Burden of Disease Study 2019. *Lancet* 2020; 396:1204-1222. [https://doi.org/10.1016/s0140-6736\(20\)30925-9](https://doi.org/10.1016/s0140-6736(20)30925-9)
6. Ding W, Hu S, Wang P, Kang H, Peng R, Dong Y, Li F Spinal Cord Injury: The Global Incidence, Prevalence, and Disability from the Global Burden of Disease Study 2019. *Spine (Phila Pa 1976)* 2022; <https://doi.org/10.1097/brs.0000000000004417>
7. Maas AIR, Menon DK, Adelson PD, Andelic N, Bell MJ, Belli A, Bragge P, Brazinova A, Büki A, Chesnut RM, Citerio G, Coburn M, Cooper DJ, Crowder AT, Czeiter E, Czosnyka M, Diaz-Arrastia R, Dreier JP, Duhaime AC, Ercole A, van Essen TA, Feigin VL, Gao G, Giacino J, Gonzalez-Lara LE, Gruen RL, Gupta D, Hartings JA, Hill S, Jiang JY, Ketharanathan N, Kompanje EJO, Lanyon L, Laureys S, Lecky F, Levin H, Lingsma HF, Maegele M, Majdan M, Manley G, Marsteller J, Mascia L, McFadyen C, Mondello S, Newcombe V, Palotie A, Parizel PM, Peul W, Piercy J, Polinder S, Puybasset L, Rasmussen TE, Rossaint R, Smielewski P, Söderberg J, Stanworth SJ, Stein MB, von Steinbüchel N, Stewart W, Steyerberg EW, Stocchetti N, Synnot A, Te Ao B, Tenovuo O, Theadom A, Tibboel D, Videtta W, Wang KKW, Williams WH, Wilson L, Yaffe K Traumatic brain injury: integrated approaches to improve prevention, clinical care, and research. *Lancet Neurol* 2017; 16:987-1048. [https://doi.org/10.1016/s1474-4422\(17\)30371-x](https://doi.org/10.1016/s1474-4422(17)30371-x)
8. Stevens GA, Alkema L, Black RE, Boerma JT, Collins GS, Ezzati M, Grove JT, Hogan DR, Hogan MC, Horton R, Lawn JE, Marušić A, Mathers CD, Murray CJ, Rudan I, Salomon JA, Simpson PJ, Vos T, Welch V Guidelines for Accurate and Transparent Health Estimates Reporting: the GATHER statement. *Lancet* 2016; 388:e19-e23. [https://doi.org/10.1016/s0140-6736\(16\)30388-9](https://doi.org/10.1016/s0140-6736(16)30388-9)
9. von Elm E, Altman DG, Egger M, Pocock SJ, Gøtzsche PC, Vandenbroucke JP The Strengthening the Reporting of Observational Studies in Epidemiology (STROBE) statement: guidelines for reporting observational studies. *Lancet* 2007; 370:1453-

- 1  
2 507 1457. [https://doi.org/10.1016/s0140-6736\(07\)61602-x](https://doi.org/10.1016/s0140-6736(07)61602-x)
- 3  
4 508 10. GBD 2019 Universal Health Coverage Collaborators. Measuring universal health  
5 509 coverage based on an index of effective coverage of health services in 204 countries  
6 510 and territories, 1990-2019: a systematic analysis for the Global Burden of Disease  
7 511 Study 2019. *Lancet* 2020; 396:1250-1284. [https://doi.org/10.1016/s0140-](https://doi.org/10.1016/s0140-6736(20)30750-9)  
8 512 [6736\(20\)30750-9](https://doi.org/10.1016/s0140-6736(20)30750-9)
- 10 513 11. Salomon JA, Haagsma JA, Davis A, de Noordhout CM, Polinder S, Havelaar AH,  
11 514 Cassini A, Devleeschauwer B, Kretzschmar M, Speybroeck N, Murray CJ, Vos T  
12 515 Disability weights for the Global Burden of Disease 2013 study. *Lancet Glob Health*  
13 516 2015; 3:e712-723. [https://doi.org/10.1016/s2214-109x\(15\)00069-8](https://doi.org/10.1016/s2214-109x(15)00069-8)
- 15 517 12. GBD 2019 Demographics Collaborators. Global age-sex-specific fertility, mortality,  
16 518 healthy life expectancy (HALE), and population estimates in 204 countries and  
17 519 territories, 1950-2019: a comprehensive demographic analysis for the Global Burden  
18 520 of Disease Study 2019. *Lancet* 2020; 396:1160-1203. [https://doi.org/10.1016/s0140-](https://doi.org/10.1016/s0140-6736(20)30977-6)  
19 521 [6736\(20\)30977-6](https://doi.org/10.1016/s0140-6736(20)30977-6)
- 22 522 13. Ye P, Er Y, Wang H, Fang L, Li B, Ivers R, Keay L, Duan L, Tian M Burden of falls  
23 523 among people aged 60 years and older in mainland China, 1990-2019: findings from  
24 524 the Global Burden of Disease Study 2019. *Lancet Public Health* 2021; 6:e907-e918.  
25 525 [https://doi.org/10.1016/s2468-2667\(21\)00231-0](https://doi.org/10.1016/s2468-2667(21)00231-0)
- 27 526 14. GBD 2019 Fracture Collaborators. Global, regional, and national burden of bone  
28 527 fractures in 204 countries and territories, 1990-2019: a systematic analysis from the  
29 528 Global Burden of Disease Study 2019. *Lancet Healthy Longev* 2021; 2:e580-e592.  
30 529 [https://doi.org/10.1016/s2666-7568\(21\)00172-0](https://doi.org/10.1016/s2666-7568(21)00172-0)
- 32 530 15. Srivastav A, Richard CL, McRell AS, Stropolis M The Unintended Consequence of  
33 531 Novel Coronavirus (COVID-19) Pandemic on Racial Inequities Associated With  
34 532 Adverse Childhood Experiences (ACEs): Findings From a Population-Based Study.  
35 533 *Front Public Health* 2021; 9:701887. <https://doi.org/10.3389/fpubh.2021.701887>
- 37 534 16. GBD 2016 Stroke Collaborators. Global, regional, and national burden of stroke,  
38 535 1990-2016: a systematic analysis for the Global Burden of Disease Study 2016.  
39 536 *Lancet Neurol* 2019; 18:439-458. [https://doi.org/10.1016/s1474-4422\(19\)30034-1](https://doi.org/10.1016/s1474-4422(19)30034-1)
- 41 537 17. Jin X, Ren J, Li R, Gao Y, Zhang H, Li J, Zhang J, Wang X, Wang G Global burden  
42 538 of upper respiratory infections in 204 countries and territories, from 1990 to 2019.  
43 539 *EClinicalMedicine* 2021; 37:100986. <https://doi.org/10.1016/j.eclinm.2021.100986>
- 45 540 18. World Health Organization. Road traffic injuries. Available at:  
46 541 <https://www.who.int/news-room/fact-sheets/detail/road-traffic-injuries>.
- 48 542 19. Hyder AA, Hoe C, Hajar M, Peden M The political and social contexts of global road  
49 543 safety: challenges for the next decade. *Lancet* 2022; 400:127-136.  
50 544 [https://doi.org/10.1016/s0140-6736\(22\)00917-5](https://doi.org/10.1016/s0140-6736(22)00917-5)
- 52 545 20. Greenland S, Senn SJ, Rothman KJ, Carlin JB, Poole C, Goodman SN, Altman DG  
53 546 Statistical tests, P values, confidence intervals, and power: a guide to  
54 547 misinterpretations. *Eur J Epidemiol* 2016; 31:337-350. [https://doi.org/10.1007/s10654-](https://doi.org/10.1007/s10654-016-0149-3)  
55 548 [016-0149-3](https://doi.org/10.1007/s10654-016-0149-3)
- 57 549 21. World Health Organization. Falls. Available at: [https://www.who.int/news-room/fact-](https://www.who.int/news-room/fact-sheets/detail/falls)  
58 550 [sheets/detail/falls](https://www.who.int/news-room/fact-sheets/detail/falls).
- 59 551 22. World Health Organization. Spinal cord injury. Available at:

- 1  
2 552 <https://www.who.int/news-room/fact-sheets/detail/spinal-cord-injury>.
- 3 553 23. The World Bank. Population (age group as % of total population). Available at:  
4 554 <https://genderdata.worldbank.org/indicators/sp-pop-zs/?age=65%2B&view=trend>.
- 5 555 24. Gillespie LD, Robertson MC, Gillespie WJ, Sherrington C, Gates S, Clemson LM,  
6 556 Lamb SE Interventions for preventing falls in older people living in the community.  
7 557 Cochrane Database Syst Rev 2012; 2012:Cd007146.  
8 558 <https://doi.org/10.1002/14651858.CD007146.pub3>
- 9 559 25. Ala-Seppälä H, Heino I, Frantzen J, Takala RS, Katila AJ, Kyllönen A, Maanpää HR,  
10 560 Posti JP, Tallus J, Tenovuori O Injury profiles, demography and representativeness of  
11 561 patients with TBI attending a regional emergency department. *Brain Inj* 2016;  
12 562 30:1062-1067. <https://doi.org/10.3109/02699052.2016.1170880>
- 13 563 26. WorldAtlas. Nordic Countries. Available at:  
14 564 <https://www.worldatlas.com/articles/nordic-countries.html>.
- 15 565 27. Chekijian S, Truzyan N, Stepanyan T, Bazarchyan A Healthcare in transition in the  
16 566 Republic of Armenia: the evolution of emergency medical systems and directions  
17 567 forward. *Int J Emerg Med* 2021; 14:5. <https://doi.org/10.1186/s12245-020-00328-3>
- 18 568 28. Peek-Asa C, Coman MA, Zorn A, Chikhladze N, Cebanu S, Tadevosyan A, Hamann  
19 569 CJ Association of traumatic brain injury severity and time to definitive care in three  
20 570 low-middle-income European countries. *Inj Prev* 2022; 28:54-60.  
21 571 <https://doi.org/10.1136/injuryprev-2020-044049>
- 22 572 29. The World Bank. GDP (current US\$). Available at:  
23 573 <https://data.worldbank.org/indicator/NY.GDP.MKTP.CD?page=1>.
- 24 574 30. Frances IU, Maxwell UN, Harold CM, Donald CO, Uloma J Determinants of Vehicle  
25 575 Ownership in Nigeria. *SAGE Open* 2020;  
26 576 [10https://doi.org/10.1177/2158244020922970](https://doi.org/10.1177/2158244020922970)
- 27 577 31. Embolo FN, Bellamkonda N, Dickson D, Motwani G, Mbeboh SN, Mbiarikai M,  
28 578 Oben E, Oke R, Dicker RA, Juillard C, Christie SA, Chichom-Mefire A Epidemiology  
29 579 of traumatic brain injury based on clinical symptoms amongst inhabitants of the  
30 580 Southwest Region of Cameroon: a community-based study. *Brain Inj* 2021; 35:1184-  
31 581 1191. <https://doi.org/10.1080/02699052.2021.1957150>
- 32 582 32. Takoukam R, Kanmounye US, Robertson FC, Zimmerman K, Nguembu S, Lartigue  
33 583 JW, Park KB, Figuim B, Esene I Prehospital Conditions and Outcomes After  
34 584 Craniotomy for Traumatic Brain Injury Performed Within 72 Hours in Central  
35 585 Cameroon: A Cross-Sectional Study. *World Neurosurg* 2020; 142:e238-e244.  
36 586 <https://doi.org/10.1016/j.wneu.2020.06.182>
- 37 587 33. Laeke T, Tirsit A, Kassahun A, Sahlu A, Debebe T, Yesihak B, Masresha S, Deyassa  
38 588 N, Moen BE, Lund-Johansen M, Sundström T Prospective Study of Surgery for  
39 589 Traumatic Brain Injury in Addis Ababa, Ethiopia: Trauma Causes, Injury Types, and  
40 590 Clinical Presentation. *World Neurosurg* 2021; 149:e460-e468.  
41 591 <https://doi.org/10.1016/j.wneu.2021.02.003>
- 42 592 34. Ackah M, Gazali Salifu M, Osei Yeboah C Estimated incidence and case fatality rate  
43 593 of traumatic brain injury among children (0-18 years) in Sub-Saharan Africa. A  
44 594 systematic review and meta-analysis. *PLoS One* 2021; 16:e0261831.  
45 595 <https://doi.org/10.1371/journal.pone.0261831>
- 46 596 35. Nizamo H, Meyrowitsch DW, Zacarias E, Konradsen F Mortality due to injuries in

- 1  
2 597 Maputo City, Mozambique. *Int J Inj Contr Saf Promot* 2006; 13:1-6.  
3 598 <https://doi.org/10.1080/17457300500151705>  
4  
5 599 36. Reddy SP, Walsh MS, Paulino-Ramirez R, Florenzán J, Fernández J, Nwariaku FE,  
6 600 Abdelnaby A Neurologic injuries following road traffic accidents in the Dominican  
7 601 Republic: Examining causes and potential solutions. *Traffic Inj Prev* 2019; 20:690-  
8 602 695. <https://doi.org/10.1080/15389588.2019.1643016>  
9  
10 603 37. The L Afghanistan: the international community must act. *Lancet* 2021; 398:1851.  
11 604 [https://doi.org/10.1016/s0140-6736\(21\)02535-6](https://doi.org/10.1016/s0140-6736(21)02535-6)  
12  
13 605 38. The United Nations. UN News Global perspective Human stories. Available at:  
14 606 <https://news.un.org/en/story/2021/09/1101162>.  
15  
16 607 39. International Committee of The Red Cross. War in Yemen. Available at:  
17 608 <https://www.icrc.org/en/war-yemen>.  
18  
19 609 40. GBD 2019 Risk Factors Collaborators. Global burden of 87 risk factors in 204  
20 610 countries and territories, 1990-2019: a systematic analysis for the Global Burden of  
21 611 Disease Study 2019. *Lancet* 2020; 396:1223-1249. [https://doi.org/10.1016/s0140-](https://doi.org/10.1016/s0140-6736(20)30752-2)  
22 612 [6736\(20\)30752-2](https://doi.org/10.1016/s0140-6736(20)30752-2)  
23 613 41. Vecino-Ortiz AI, Nagarajan M, Elaraby S, Guzman-Tordecilla DN, Paichadze N,  
24 614 Hyder AA Saving lives through road safety risk factor interventions: global and  
25 615 national estimates. *Lancet* 2022; 400:237-250. [https://doi.org/10.1016-s0140-](https://doi.org/10.1016/s0140-6736(22)00918-7)  
26 616 [6736\(22\)00918-7](https://doi.org/10.1016/s0140-6736(22)00918-7)  
27  
28 617  
29 618

1  
2 619 **Figure Legends**

3 620

4  
5 621 **Figure 1**

6 622

7 623 Age-standardized incidence rates per 100,000 persons of traumatic brain injury (A) and spinal  
8 624 cord injury (B) by countries and territories, 2019

9 625

10  
11 626 **Figure 2**

12 627

13  
14 628 The most common causes for age-standardized incidence rates of traumatic brain injury (A)  
15 629 and spinal cord injury (B) by countries and territories, 2019

16 630

17  
18 631 **Figure 3**

19 632

20 633 Number of countries and territories by the most common causes for age-standardized  
21 634 incidence rates of traumatic brain injury (TBI) (A) and spinal cord injury (SCI) (B);

22 635

23  
24 636 total countries and territories=204; the listed are the top three countries and territories with  
25 637 age-standardized incidence rates caused by each cause, 2019; and the top three with both the  
26 638 largest increase and the largest decrease, 1990–2019

27  
28  
29  
30  
31  
32  
33  
34  
35  
36  
37  
38  
39  
40  
41  
42  
43  
44  
45  
46  
47  
48  
49  
50  
51  
52  
53  
54  
55  
56  
57  
58  
59  
60

Table 1. Incidence and prevalence of traumatic brain injury in 2019, and percentage changes of age-standardized rates/estimates by location, 1990–2019

|                                  | Incidence                       |                                                             |                                                                            | Prevalence                      |                                                                 |                                                                                |
|----------------------------------|---------------------------------|-------------------------------------------------------------|----------------------------------------------------------------------------|---------------------------------|-----------------------------------------------------------------|--------------------------------------------------------------------------------|
|                                  | Numbers<br>(95% UI)<br>(2019)   | Age-standardized<br>rates per 100,000<br>(95% UI)<br>(2019) | Percentage change of age-<br>standardized rates<br>(95% UI)<br>(1990–2019) | Numbers<br>(95% UI)<br>(2019)   | Age-standardized<br>estimates per 100,000<br>(95% UI)<br>(2019) | Percentage change of age-<br>standardized estimates<br>(95% UI)<br>(1990–2019) |
| <b>Global</b>                    | 27160708 (23357251 to 31415052) | 346 (298 to 401)                                            | -5.5% (-8.9% to -3.0%)                                                     | 48987927 (46840150 to 51316804) | 599 (573 to 627)                                                | 0.0% (-1.1% to 1.2%)                                                           |
| <b>High-income</b>               | 4749065 (4069211 to 5570829)    | 385 (327 to 466)                                            | -10.6% (-12.9% to -8.2%)                                                   | 9628688 (9197255 to 10070244)   | 611 (585 to 640)                                                | -8.6% (-9.6% to -7.6%)                                                         |
| <b>High-income North America</b> | 1343020 (1130550 to 1633382)    | 339 (280 to 416)                                            | -13.7% (-17.1% to -10.0%)                                                  | 2529864 (2411434 to 2659615)    | 503 (480 to 530)                                                | -10.8% (-12% to -9.6%)                                                         |
| Canada                           | 208010 (181031 to 239428)       | 435 (381 to 500)                                            | -1.4% (-5.7% to 2.8%)                                                      | 409106 (389130 to 430098)       | 732 (699 to 768)                                                | -2.5% (-4.4% to -0.4%)                                                         |
| Greenland                        | 191 (152 to 242)                | 332 (264 to 426)                                            | -28.4% (-31.8% to -25.4%)                                                  | 273 (261 to 287)                | 418 (399 to 439)                                                | -23.5% (-24.8% to -22.1%)                                                      |
| United States of America         | 1134798 (933708 to 1399550)     | 327 (266 to 406)                                            | -15.7% (-19.3% to -11.8%)                                                  | 2120444 (2015771 to 2235606)    | 476 (452 to 503)                                                | -12.6% (-13.9% to -11.4%)                                                      |
| <b>Australasia</b>               | 227584 (194914 to 270506)       | 729 (613 to 889)                                            | 2.6% (-0.9% to 6.0%)                                                       | 437585 (414576 to 462102)       | 1145 (1082 to 1220)                                             | 2.5% (0.7% to 4.3%)                                                            |
| Australia                        | 188496 (161519 to 224241)       | 712 (595 to 871)                                            | 3.3% (-0.6% to 7.2%)                                                       | 361334 (342297 to 381913)       | 1118 (1056 to 1194)                                             | 3.1% (1.2% to 5.2%)                                                            |
| New Zealand                      | 39088 (33612 to 46185)          | 820 (697 to 985)                                            | 0.9% (-3.7% to 5.9%)                                                       | 76252 (72471 to 80358)          | 1291 (1225 to 1367)                                             | 0.7% (-1.4% to 3.3%)                                                           |
| <b>High-income Asia Pacific</b>  | 684210 (585181 to 807782)       | 337 (282 to 414)                                            | -12.8% (-15.8% to -9.6%)                                                   | 1569359 (1503598 to 1638630)    | 526 (504 to 552)                                                | -9.8% (-11.0% to -8.5%)                                                        |



1  
2  
3  
4  
5  
6  
7  
8  
9  
10  
11  
12  
13  
14  
15  
16  
17  
18  
19  
20  
21  
22  
23  
24  
25  
26  
27  
28  
29  
30  
31  
32  
33  
34  
35  
36  
37  
38  
39  
40  
41  
42  
43  
44  
45  
46

|                   | Incidence                     |                                                             |                                                                            | Prevalence                    |                                                                 |                                                                                |
|-------------------|-------------------------------|-------------------------------------------------------------|----------------------------------------------------------------------------|-------------------------------|-----------------------------------------------------------------|--------------------------------------------------------------------------------|
|                   | Numbers<br>(95% UI)<br>(2019) | Age-standardized<br>rates per 100,000<br>(95% UI)<br>(2019) | Percentage change of age-<br>standardized rates<br>(95% UI)<br>(1990–2019) | Numbers<br>(95% UI)<br>(2019) | Age-standardized<br>estimates per 100,000<br>(95% UI)<br>(2019) | Percentage change of age-<br>standardized estimates<br>(95% UI)<br>(1990–2019) |
| Brunei Darussalam | 1717 (1474 to 2014)           | 399 (346 to 466)                                            | -13.5% (-16.8% to -10.4%)                                                  | 2753 (2625 to 2901)           | 645 (618 to 676)                                                | -13.7% (-15.4% to -12.1%)                                                      |
| Japan             | 401396 (337356 to 483481)     | 294 (238 to 374)                                            | -14.6% (-17.6% to -11.6%)                                                  | 942598 (902464 to 984158)     | 432 (413 to 452)                                                | -16.1% (-17.2% to -15%)                                                        |
| Republic of Korea | 261650 (229995 to 301800)     | 447 (385 to 523)                                            | -12.4% (-17% to -7.5%)                                                     | 578220 (549546 to 608111)     | 756 (719 to 796)                                                | -8.5% (-10.5% to -6.5%)                                                        |
| Singapore         | 19447 (16786 to 22882)        | 348 (297 to 415)                                            | -9.7% (-13.1% to -6.0%)                                                    | 45787 (43497 to 48284)        | 619 (589 to 654)                                                | -2.7% (-4.7% to -0.7%)                                                         |
| Western Europe    | 2211884 (1887690 to 2613432)  | 413 (352 to 494)                                            | -10.0% (-13.2% to -6.4%)                                                   | 4558854 (4307986 to 4805028)  | 687 (652 to 726)                                                | -8.5% (-10.2% to -6.8%)                                                        |
| Andorra           | 483 (413 to 572)              | 497 (426 to 591)                                            | 0.7% (-2.7% to 4.2%)                                                       | 1054 (1001 to 1112)           | 860 (816 to 908)                                                | 2.1% (0.2% to 4.3%)                                                            |
| Austria           | 49798 (42570 to 58889)        | 459 (390 to 544)                                            | -14.6% (-18.6% to -10.2%)                                                  | 102932 (97216 to 109369)      | 764 (721 to 815)                                                | -11.8% (-14% to -9.3%)                                                         |
| Belgium           | 79891 (68166 to 95248)        | 545 (461 to 653)                                            | 6.5% (1.7% to 11.3%)                                                       | 157277 (148398 to 167372)     | 903 (852 to 962)                                                | 5.6% (3.0% to 8.4%)                                                            |
| Cyprus            | 5975 (5132 to 7037)           | 440 (374 to 527)                                            | 0.7% (-3.9% to 5.3%)                                                       | 11806 (11149 to 12487)        | 709 (669 to 751)                                                | 2.0% (-0.8% to 5.0%)                                                           |
| Denmark           | 27541 (23501 to 32541)        | 410 (345 to 495)                                            | -19.9% (-24.8% to -14.9%)                                                  | 55684 (52605 to 58826)        | 678 (638 to 721)                                                | -14.3% (-16.9% to -11.6%)                                                      |
| Finland           | 40725 (34945 to 47999)        | 599 (502 to 730)                                            | -9.5% (-13.4% to -5.3%)                                                    | 85065 (80164 to 90379)        | 997 (936 to 1071)                                               | -6.0% (-8.3% to -3.3%)                                                         |

1  
2  
3  
4  
5  
6  
7  
8  
9  
10  
11  
12  
13  
14  
15  
16  
17  
18  
19  
20  
21  
22  
23  
24  
25  
26  
27  
28  
29  
30  
31  
32  
33  
34  
35  
36  
37  
38  
39  
40  
41  
42  
43  
44  
45  
46

|             | Incidence                     |                                                             |                                                                            | Prevalence                    |                                                                 |                                                                                |
|-------------|-------------------------------|-------------------------------------------------------------|----------------------------------------------------------------------------|-------------------------------|-----------------------------------------------------------------|--------------------------------------------------------------------------------|
|             | Numbers<br>(95% UI)<br>(2019) | Age-standardized<br>rates per 100,000<br>(95% UI)<br>(2019) | Percentage change of age-<br>standardized rates<br>(95% UI)<br>(1990–2019) | Numbers<br>(95% UI)<br>(2019) | Age-standardized<br>estimates per 100,000<br>(95% UI)<br>(2019) | Percentage change of age-<br>standardized estimates<br>(95% UI)<br>(1990–2019) |
| France      | 437805 (371350 to 520101)     | 500 (426 to 599)                                            | -9.4% (-13.6% to -5.2%)                                                    | 850166 (803396 to 897985)     | 831 (786 to 879)                                                | -7.6% (-9.7% to -5.4%)                                                         |
| Germany     | 459776 (391023 to 540848)     | 425 (361 to 507)                                            | -5.1% (-9.5% to -0.3%)                                                     | 943401 (888790 to 996046)     | 700 (661 to 744)                                                | -4.4% (-6.9% to -1.9%)                                                         |
| Greece      | 40552 (35287 to 46979)        | 378 (321 to 452)                                            | -13.1% (-17.3% to -9.2%)                                                   | 102345 (97112 to 107847)      | 673 (635 to 713)                                                | -11.9% (-13.9% to -9.7%)                                                       |
| Iceland     | 1547 (1322 to 1823)           | 410 (347 to 493)                                            | -4.4% (-8.5% to -0.5%)                                                     | 3117 (2943 to 3311)           | 699 (657 to 745)                                                | -4.1% (-6.7% to -1.5%)                                                         |
| Ireland     | 20279 (17258 to 24025)        | 399 (336 to 479)                                            | -5.0% (-9.9% to -0.1%)                                                     | 41596 (39247 to 44184)        | 678 (639 to 724)                                                | -1.1% (-3.7% to 1.5%)                                                          |
| Israel      | 34415 (29353 to 40786)        | 363 (309 to 432)                                            | -5.3% (-10.8% to 0.5%)                                                     | 65091 (61407 to 69200)        | 652 (613 to 695)                                                | 3.6% (0.3% to 7.5%)                                                            |
| Italy       | 293426 (244319 to 355929)     | 377 (319 to 451)                                            | -23.1% (-26.1% to -20.0%)                                                  | 652766 (614279 to 691707)     | 657 (621 to 694)                                                | -18.7% (-20.0% to -17.3%)                                                      |
| Luxembourg  | 3303 (2824 to 3882)           | 471 (403 to 560)                                            | -13.5% (-18.3% to -9.0%)                                                   | 6658 (6300 to 7033)           | 788 (746 to 834)                                                | -11.4% (-13.4% to -9.2%)                                                       |
| Malta       | 2163 (1841 to 2568)           | 448 (374 to 543)                                            | 5.1% (1.2% to 9.0%)                                                        | 4834 (4558 to 5115)           | 754 (709 to 804)                                                | 10.1% (7.5% to 12.8%)                                                          |
| Monaco      | 99 (79 to 125)                | 286 (221 to 372)                                            | 4.1% (-0.2% to 8.5%)                                                       | 213 (203 to 224)              | 370 (352 to 391)                                                | 1.1% (-0.8% to 3.0%)                                                           |
| Netherlands | 96639 (82271 to 114651)       | 418 (358 to 495)                                            | 11.8% (6.9% to 16.8%)                                                      | 174265 (164438 to 183817)     | 659 (625 to 692)                                                | 7.6% (5.0% to 10.0%)                                                           |
| Norway      | 17945 (14487 to 22608)        | 305 (239 to 394)                                            | -12.9% (-16.7% to -8.7%)                                                   | 29219 (27778 to 30849)        | 387 (369 to 408)                                                | -15.1% (-16.4% to -13.7%)                                                      |

1  
2  
3  
4  
5  
6  
7  
8  
9  
10  
11  
12  
13  
14  
15  
16  
17  
18  
19  
20  
21  
22  
23  
24  
25  
26  
27  
28  
29  
30  
31  
32  
33  
34  
35  
36  
37  
38  
39  
40  
41  
42  
43  
44  
45  
46

|                                | Incidence                     |                                                             |                                                                            | Prevalence                    |                                                                 |                                                                                |
|--------------------------------|-------------------------------|-------------------------------------------------------------|----------------------------------------------------------------------------|-------------------------------|-----------------------------------------------------------------|--------------------------------------------------------------------------------|
|                                | Numbers<br>(95% UI)<br>(2019) | Age-standardized<br>rates per 100,000<br>(95% UI)<br>(2019) | Percentage change of age-<br>standardized rates<br>(95% UI)<br>(1990–2019) | Numbers<br>(95% UI)<br>(2019) | Age-standardized<br>estimates per 100,000<br>(95% UI)<br>(2019) | Percentage change of age-<br>standardized estimates<br>(95% UI)<br>(1990–2019) |
| Portugal                       | 36993 (32073 to 43127)        | 291 (251 to 340)                                            | -30.4% (-34.4% to -26.4%)                                                  | 83546 (79556 to 87660)        | 495 (472 to 520)                                                | -30.6% (-32.7% to -28.7%)                                                      |
| San Marino                     | 95 (75 to 122)                | 296 (228 to 386)                                            | -2.9% (-8.0% to 2.3%)                                                      | 174 (167 to 183)              | 382 (363 to 404)                                                | -6.2% (-8.1% to -4.3%)                                                         |
| Spain                          | 193591 (166251 to 227169)     | 378 (320 to 451)                                            | -11.6% (-17.8% to -4.6%)                                                   | 455709 (431959 to 480189)     | 663 (626 to 706)                                                | -11.3% (-14.6% to -8.2%)                                                       |
| Sweden                         | 31091 (24594 to 39906)        | 290 (223 to 384)                                            | -9.8% (-13.6% to -5.4%)                                                    | 52538 (49831 to 55634)        | 357 (339 to 378)                                                | -13.2% (-14.8% to -11.4%)                                                      |
| Switzerland                    | 59413 (50433 to 70834)        | 537 (453 to 647)                                            | -20.5% (-24.3% to -16.6%)                                                  | 118708 (111882 to 125639)     | 886 (832 to 944)                                                | -18.1% (-20.1% to -15.4%)                                                      |
| United Kingdom                 | 276411 (233936 to 329374)     | 364 (306 to 440)                                            | -1.4% (-5.3% to 2.1%)                                                      | 556715 (524564 to 587112)     | 592 (559 to 625)                                                | -1.2% (-3.0% to 0.5%)                                                          |
| <b>Southern Latin America</b>  | 282368 (245426 to 331894)     | 420 (363 to 497)                                            | 2.9% (0.0% to 5.8%)                                                        | 533026 (510966 to 557226)     | 710 (680 to 744)                                                | 7.4% (5.7% to 9.0%)                                                            |
| Argentina                      | 185347 (160190 to 218721)     | 410 (352 to 486)                                            | 1.3% (-2.2% to 4.9%)                                                       | 341995 (327397 to 357857)     | 694 (664 to 727)                                                | 6.0% (3.9% to 8.0%)                                                            |
| Chile                          | 80432 (70305 to 93851)        | 435 (376 to 515)                                            | 7.9% (4.3% to 11.9%)                                                       | 158038 (151516 to 164956)     | 732 (701 to 765)                                                | 12.7% (10.9% to 14.8%)                                                         |
| Uruguay                        | 16575 (14375 to 19433)        | 471 (405 to 557)                                            | -4.7% (-10.7% to 1.2%)                                                     | 32966 (31674 to 34324)        | 790 (757 to 823)                                                | 0.9% (-1.4% to 3.3%)                                                           |
| <b>Central Europe, Eastern</b> | 2810851 (2441242 to 3280460)  | 652 (562 to 756)                                            | -20.0% (-21.6% to -18.3%)                                                  | 6272924 (5973428 to 6572420)  | 1179 (1121 to 1245)                                             | -17.0% (-17.9% to -16.2%)                                                      |

1  
2  
3  
4  
5  
6  
7  
8  
9  
10  
11  
12  
13  
14  
15  
16  
17  
18  
19  
20  
21  
22  
23  
24  
25  
26  
27  
28  
29  
30  
31  
32  
33  
34  
35  
36  
37  
38  
39  
40  
41  
42  
43  
44  
45  
46

|                                 | Incidence                       |                                                             |                                                                            | Prevalence                      |                                                                 |                                                                                |
|---------------------------------|---------------------------------|-------------------------------------------------------------|----------------------------------------------------------------------------|---------------------------------|-----------------------------------------------------------------|--------------------------------------------------------------------------------|
|                                 | Numbers<br>(95% UI)<br>(2019)   | Age-standardized<br>rates per 100,000<br>(95% UI)<br>(2019) | Percentage change of age-<br>standardized rates<br>(95% UI)<br>(1990–2019) | Numbers<br>(95% UI)<br>(2019)   | Age-standardized<br>estimates per 100,000<br>(95% UI)<br>(2019) | Percentage change of age-<br>standardized estimates<br>(95% UI)<br>(1990–2019) |
| <b>Europe, and Central Asia</b> | 3232848)                        |                                                             |                                                                            | 6619235)                        |                                                                 |                                                                                |
| <b>Eastern Europe</b>           | 1596337 (1380438 to<br>1851604) | 737 (633 to 857)                                            | -19.3% (-20.9% to -17.5%)                                                  | 3684328 (3481748 to<br>3916305) | 1312 (1240 to 1393)                                             | -17.6% (-18.6% to -16.7%)                                                      |
| Belarus                         | 68634 (60179 to<br>79328)       | 691 (601 to 800)                                            | -10.9% (-16.4% to -5.6%)                                                   | 151525 (144167 to<br>160168)    | 1175 (1117 to 1241)                                             | -12.7% (-14.5% to -11.1%)                                                      |
| Estonia                         | 7956 (6969 to 9194)             | 593 (515 to 689)                                            | -37.3% (-41.3% to -33.3%)                                                  | 19177 (18313 to<br>20152)       | 1044 (995 to 1095)                                              | -34.7% (-36.1% to -33.0%)                                                      |
| Latvia                          | 12779 (11230 to<br>14679)       | 637 (556 to 735)                                            | -38.7% (-42.4% to -34.9%)                                                  | 30132 (28879 to<br>31651)       | 1095 (1046 to 1150)                                             | -37.2% (-38.4% to -35.9%)                                                      |
| Lithuania                       | 21385 (18860 to<br>24407)       | 696 (610 to 803)                                            | -27.3% (-31.4% to -23.4%)                                                  | 49561 (47552 to<br>51935)       | 1205 (1155 to 1265)                                             | -26.9% (-28.3% to -25.2%)                                                      |
| Republic of Moldova             | 20142 (17703 to<br>22874)       | 535 (467 to 613)                                            | -27.6% (-31.4% to -23.6%)                                                  | 45620 (43596 to<br>47808)       | 939 (896 to 983)                                                | -25.5% (-27.0% to -24.1%)                                                      |
| Russian Federation              | 1147613 (987359 to<br>1334447)  | 755 (648 to 882)                                            | -20.3% (-22.5% to -17.9%)                                                  | 2659714 (2510186 to<br>2831620) | 1365 (1288 to 1450)                                             | -17.7% (-18.8% to -16.6%)                                                      |
| Ukraine                         | 317828 (274671 to<br>370646)    | 721 (619 to 844)                                            | -15.2% (-17.5% to -12.9%)                                                  | 728598 (688793 to<br>774019)    | 1229 (1162 to 1305)                                             | -16.5% (-18.1% to -15.0%)                                                      |
| <b>Central Europe</b>           | 860390 (750474 to<br>986981)    | 729 (631 to 857)                                            | -13.8% (-16.4% to -11.0%)                                                  | 1996004 (1907261 to<br>2099717) | 1259 (1200 to 1325)                                             | -9.3% (-10.7% to -8.0%)                                                        |
| Albania                         | 17546 (15114 to                 | 661 (566 to 787)                                            | -6.5% (-12.7% to -0.1%)                                                    | 40368 (38379 to                 | 1180 (1119 to 1241)                                             | -0.4% (-3.1% to 1.7%)                                                          |

1  
2  
3  
4  
5  
6  
7  
8  
9  
10  
11  
12  
13  
14  
15  
16  
17  
18  
19  
20  
21  
22  
23  
24  
25  
26  
27  
28  
29  
30  
31  
32  
33  
34  
35  
36  
37  
38  
39  
40  
41  
42  
43  
44  
45  
46

|                        | Incidence                     |                                                             |                                                                            | Prevalence                    |                                                                 |                                                                                |
|------------------------|-------------------------------|-------------------------------------------------------------|----------------------------------------------------------------------------|-------------------------------|-----------------------------------------------------------------|--------------------------------------------------------------------------------|
|                        | Numbers<br>(95% UI)<br>(2019) | Age-standardized<br>rates per 100,000<br>(95% UI)<br>(2019) | Percentage change of age-<br>standardized rates<br>(95% UI)<br>(1990–2019) | Numbers<br>(95% UI)<br>(2019) | Age-standardized<br>estimates per 100,000<br>(95% UI)<br>(2019) | Percentage change of age-<br>standardized estimates<br>(95% UI)<br>(1990–2019) |
|                        | 20694)                        |                                                             |                                                                            | 42440)                        |                                                                 |                                                                                |
| Bosnia and Herzegovina | 21054 (18270 to 24541)        | 664 (567 to 787)                                            | -2.3% (-11.0% to 3.9%)                                                     | 55240 (51846 to 59262)        | 1233 (1156 to 1324)                                             | 14.7% (11.3% to 20.0%)                                                         |
| Bulgaria               | 45758 (39781 to 53064)        | 712 (611 to 836)                                            | -10.8% (-15.5% to -6.8%)                                                   | 115486 (110330 to 121483)     | 1206 (1148 to 1267)                                             | -9.5% (-11.0% to -7.8%)                                                        |
| Croatia                | 42676 (37073 to 49095)        | 840 (733 to 973)                                            | -8.7% (-14.3% to -3.1%)                                                    | 90349 (86071 to 94948)        | 1430 (1363 to 1501)                                             | -6.6% (-8.7% to -4.4%)                                                         |
| Czechia                | 89409 (78044 to 102472)       | 800 (691 to 935)                                            | -19.9% (-23.8% to -15.7%)                                                  | 210700 (201553 to 221445)     | 1397 (1333 to 1468)                                             | -11.6% (-13.6% to -9.5%)                                                       |
| Hungary                | 76538 (66601 to 87694)        | 721 (622 to 848)                                            | -25.3% (-29.3% to -20.8%)                                                  | 166974 (159293 to 175128)     | 1197 (1140 to 1257)                                             | -19.3% (-21.3% to -17.1%)                                                      |
| Montenegro             | 4534 (3961 to 5250)           | 727 (628 to 855)                                            | -1.2% (-4.0% to 2.0%)                                                      | 9943 (9483 to 10437)          | 1250 (1192 to 1312)                                             | 0.2% (-1.4% to 1.9%)                                                           |
| North Macedonia        | 13508 (11694 to 15736)        | 644 (551 to 760)                                            | 4.0% (-2.9% to 10.2%)                                                      | 30086 (28684 to 31639)        | 1095 (1042 to 1151)                                             | 5.7% (3.4% to 7.7%)                                                            |
| Poland                 | 300905 (260824 to 348188)     | 746 (639 to 876)                                            | -11.9% (-14.9% to -8.8%)                                                   | 701517 (667414 to 740911)     | 1313 (1247 to 1386)                                             | -7.9% (-9.5% to -6.3%)                                                         |
| Romania                | 125140 (109393 to 144911)     | 662 (567 to 782)                                            | -17.1% (-20.8% to -13.0%)                                                  | 296504 (282553 to 312297)     | 1120 (1063 to 1179)                                             | -14.3% (-16.1% to -12.8%)                                                      |
| Serbia                 | 56442 (49158 to 65675)        | 651 (556 to 771)                                            | -5.0% (-10.0% to 0.8%)                                                     | 131249 (125348 to 138035)     | 1135 (1080 to 1195)                                             | -4.3% (-7.0% to -1.2%)                                                         |

1  
2  
3  
4  
5  
6  
7  
8  
9  
10  
11  
12  
13  
14  
15  
16  
17  
18  
19  
20  
21  
22  
23  
24  
25  
26  
27  
28  
29  
30  
31  
32  
33  
34  
35  
36  
37  
38  
39  
40  
41  
42  
43  
44  
45  
46

|              | Incidence                     |                                                             |                                                                            | Prevalence                    |                                                                 |                                                                                |
|--------------|-------------------------------|-------------------------------------------------------------|----------------------------------------------------------------------------|-------------------------------|-----------------------------------------------------------------|--------------------------------------------------------------------------------|
|              | Numbers<br>(95% UI)<br>(2019) | Age-standardized<br>rates per 100,000<br>(95% UI)<br>(2019) | Percentage change of age-<br>standardized rates<br>(95% UI)<br>(1990–2019) | Numbers<br>(95% UI)<br>(2019) | Age-standardized<br>estimates per 100,000<br>(95% UI)<br>(2019) | Percentage change of age-<br>standardized estimates<br>(95% UI)<br>(1990–2019) |
| Slovakia     | 45752 (39889 to 52835)        | 802 (694 to 936)                                            | -10.8% (-14.7% to -6.8%)                                                   | 100130 (95678 to 105347)      | 1351 (1290 to 1415)                                             | -6.4% (-8.0% to -4.6%)                                                         |
| Slovenia     | 21129 (18353 to 24397)        | 885 (768 to 1036)                                           | -18% (-22.1% to -13.8%)                                                    | 47458 (45204 to 49694)        | 1521 (1448 to 1595)                                             | -15.3% (-17.2% to -13.1%)                                                      |
| Central Asia | 354124 (307249 to 410664)     | 374 (325 to 433)                                            | -8.7% (-11.1% to -6.5%)                                                    | 592593 (564520 to 622301)     | 650 (621 to 682)                                                | -7.7% (-8.9% to -6.6%)                                                         |
| Armenia      | 10102 (8759 to 11727)         | 342 (295 to 401)                                            | -28.6% (-32.0% to -25.0%)                                                  | 26341 (23832 to 30265)        | 724 (655 to 830)                                                | -34.2% (-38.8% to -30%)                                                        |
| Azerbaijan   | 33547 (28879 to 39351)        | 323 (278 to 379)                                            | -12.0% (-16.2% to -7.2%)                                                   | 62368 (59069 to 65715)        | 553 (524 to 581)                                                | -9.5% (-11.7% to -7.0%)                                                        |
| Georgia      | 18034 (15773 to 20821)        | 502 (433 to 585)                                            | 6.1% (1.9% to 10.7%)                                                       | 38008 (36181 to 39921)        | 827 (787 to 868)                                                | 6.5% (4.3% to 8.8%)                                                            |
| Kazakhstan   | 85299 (74100 to 98232)        | 461 (400 to 530)                                            | -4.5% (-8.6% to -0.8%)                                                     | 149753 (142403 to 157250)     | 784 (748 to 823)                                                | -1.5% (-3.2% to 0.1%)                                                          |
| Kyrgyzstan   | 22763 (19622 to 26463)        | 343 (297 to 398)                                            | -20.5% (-24.3% to -16.5%)                                                  | 35868 (34193 to 37595)        | 609 (581 to 639)                                                | -14.9% (-16.6% to -13.3%)                                                      |
| Mongolia     | 15601 (13536 to 18142)        | 451 (393 to 526)                                            | 17.8% (13.9% to 21.9%)                                                     | 24286 (23110 to 25572)        | 734 (702 to 772)                                                | 23.5% (21.5% to 25.7%)                                                         |
| Tajikistan   | 29009 (24797 to 34252)        | 298 (258 to 350)                                            | -21.7% (-24.8% to -18.6%)                                                  | 43353 (40216 to 47274)        | 542 (504 to 590)                                                | -14.5% (-19.0% to -7.9%)                                                       |

1  
2  
3  
4  
5  
6  
7  
8  
9  
10  
11  
12  
13  
14  
15  
16  
17  
18  
19  
20  
21  
22  
23  
24  
25  
26  
27  
28  
29  
30  
31  
32  
33  
34  
35  
36  
37  
38  
39  
40  
41  
42  
43  
44  
45  
46

|                                    | Incidence                     |                                                             |                                                                            | Prevalence                    |                                                                 |                                                                                |
|------------------------------------|-------------------------------|-------------------------------------------------------------|----------------------------------------------------------------------------|-------------------------------|-----------------------------------------------------------------|--------------------------------------------------------------------------------|
|                                    | Numbers<br>(95% UI)<br>(2019) | Age-standardized<br>rates per 100,000<br>(95% UI)<br>(2019) | Percentage change of age-<br>standardized rates<br>(95% UI)<br>(1990–2019) | Numbers<br>(95% UI)<br>(2019) | Age-standardized<br>estimates per 100,000<br>(95% UI)<br>(2019) | Percentage change of age-<br>standardized estimates<br>(95% UI)<br>(1990–2019) |
| Turkmenistan                       | 16375 (14087 to 19322)        | 316 (272 to 373)                                            | -5.1% (-9.9% to -0.2%)                                                     | 25771 (24602 to 27050)        | 524 (502 to 549)                                                | -5.8% (-7.8% to -3.8%)                                                         |
| Uzbekistan                         | 123394 (106270 to 143651)     | 358 (311 to 415)                                            | 1.3% (-2.8% to 4.8%)                                                       | 186844 (177804 to 196282)     | 597 (570 to 626)                                                | 0.7% (-0.9% to 2.5%)                                                           |
| <b>Latin America and Caribbean</b> | 1601404 (1357254 to 1904769)  | 273 (231 to 324)                                            | -12.4% (-16.0% to -9.8%)                                                   | 2607065 (2504148 to 2726076)  | 430 (413 to 450)                                                | -7.1% (-8.6% to -5.6%)                                                         |
| <b>Central Latin America</b>       | 765677 (649993 to 907182)     | 306 (260 to 363)                                            | -17.2% (-21.4% to -14.1%)                                                  | 1257961 (1206027 to 1317005)  | 502 (482 to 526)                                                | -13.2% (-14.9% to -11.9%)                                                      |
| Colombia                           | 162401 (141821 to 184268)     | 341 (297 to 389)                                            | -29.1% (-38.2% to -23.2%)                                                  | 332994 (319128 to 348824)     | 648 (620 to 679)                                                | -21.3% (-23.3% to -19.4%)                                                      |
| Costa Rica                         | 16510 (14473 to 18827)        | 352 (306 to 402)                                            | 0.4% (-3.6% to 4.0%)                                                       | 31385 (30134 to 32937)        | 615 (590 to 645)                                                | 3.4% (1.6% to 5.2%)                                                            |
| El Salvador                        | 23137 (20203 to 26687)        | 366 (321 to 422)                                            | -24.1% (-44.4% to -8.2%)                                                   | 42703 (39065 to 48120)        | 704 (642 to 796)                                                | -15.8% (-26.7% to -5.9%)                                                       |
| Guatemala                          | 59797 (51515 to 70653)        | 340 (296 to 396)                                            | -11.3% (-30.7% to 1.4%)                                                    | 81261 (76894 to 87161)        | 566 (535 to 610)                                                | -0.8% (-10.9% to 6.7%)                                                         |
| Honduras                           | 31620 (27148 to 36947)        | 321 (279 to 372)                                            | 4.7% (-0.1% to 9.8%)                                                       | 43820 (41768 to 45816)        | 544 (520 to 567)                                                | 6.6% (4.5% to 8.9%)                                                            |
| Mexico                             | 339717 (272861 to 424935)     | 271 (219 to 339)                                            | -15.4% (-17.4% to -13.1%)                                                  | 480897 (459524 to 507789)     | 383 (366 to 404)                                                | -13.1% (-14.1% to -12%)                                                        |

1  
2  
3  
4  
5  
6  
7  
8  
9  
10  
11  
12  
13  
14  
15  
16  
17  
18  
19  
20  
21  
22  
23  
24  
25  
26  
27  
28  
29  
30  
31  
32  
33  
34  
35  
36  
37  
38  
39  
40  
41  
42  
43  
44  
45  
46

|                                    | Incidence                     |                                                             |                                                                            | Prevalence                    |                                                                 |                                                                                |
|------------------------------------|-------------------------------|-------------------------------------------------------------|----------------------------------------------------------------------------|-------------------------------|-----------------------------------------------------------------|--------------------------------------------------------------------------------|
|                                    | Numbers<br>(95% UI)<br>(2019) | Age-standardized<br>rates per 100,000<br>(95% UI)<br>(2019) | Percentage change of age-<br>standardized rates<br>(95% UI)<br>(1990–2019) | Numbers<br>(95% UI)<br>(2019) | Age-standardized<br>estimates per 100,000<br>(95% UI)<br>(2019) | Percentage change of age-<br>standardized estimates<br>(95% UI)<br>(1990–2019) |
| Nicaragua                          | 17213 (14760 to 20240)        | 269 (233 to 313)                                            | -6.9% (-12% to -2.4%)                                                      | 30687 (27244 to 36377)        | 548 (485 to 655)                                                | -21.3% (-31.8% to -11.8%)                                                      |
| Panama                             | 12749 (11095 to 14736)        | 306 (266 to 354)                                            | -5.9% (-10.2% to -1.9%)                                                    | 23078 (22046 to 24233)        | 551 (526 to 578)                                                | -4.6% (-7.1% to -2.7%)                                                         |
| Venezuela (Bolivarian Republic of) | 102532 (89076 to 118625)      | 371 (321 to 430)                                            | -6.0% (-11.2% to -0.8%)                                                    | 191135 (183441 to 199635)     | 644 (618 to 672)                                                | -3.9% (-6.2% to -2.2%)                                                         |
| <b>Andean Latin America</b>        | 154311 (135039 to 178003)     | 243 (213 to 279)                                            | -9.5% (-23.6% to 0.1%)                                                     | 258082 (247394 to 269334)     | 425 (408 to 443)                                                | 5.6% (2.9% to 8.2%)                                                            |
| Bolivia (Plurinational State of)   | 26248 (22834 to 30390)        | 224 (196 to 257)                                            | -2.2% (-6.1% to 1.7%)                                                      | 38426 (36793 to 40095)        | 368 (353 to 383)                                                | 1.8% (-0.1% to 3.7%)                                                           |
| Ecuador                            | 49398 (43363 to 56599)        | 282 (248 to 322)                                            | 10.8% (7.0% to 14.7%)                                                      | 81011 (77741 to 84639)        | 489 (469 to 511)                                                | 9.3% (6.5% to 11.9%)                                                           |
| Peru                               | 78666 (68391 to 91205)        | 230 (201 to 267)                                            | -19.5% (-38.6% to -5.3%)                                                   | 138644 (132302 to 145836)     | 411 (393 to 432)                                                | 4.5% (0.5% to 8.1%)                                                            |
| <b>Caribbean</b>                   | 155545 (137052 to 177959)     | 325 (286 to 373)                                            | 8.5% (4.6% to 12.2%)                                                       | 279129 (266795 to 292459)     | 555 (531 to 582)                                                | 9.8% (7.1% to 13.5%)                                                           |
| Antigua and Barbuda                | 250 (216 to 296)              | 287 (246 to 341)                                            | 7.1% (2.8% to 11.5%)                                                       | 490 (471 to 510)              | 483 (464 to 502)                                                | 7.9% (6.0% to 9.8%)                                                            |
| Bahamas                            | 1087 (951 to 1240)            | 289 (253 to 330)                                            | 4.4% (-0.7% to 9.4%)                                                       | 2096 (2015 to 2181)           | 504 (486 to 525)                                                | 4.3% (2.5% to 6.4%)                                                            |
| Barbados                           | 749 (659 to 853)              | 255 (222 to 295)                                            | 4.8% (-0.3% to 9.4%)                                                       | 1720 (1657 to 1783)           | 447 (430 to 464)                                                | 4.5% (2.3% to 6.8%)                                                            |
| Belize                             | 1314 (1132 to 1524)           | 314 (273 to 362)                                            | 9.8% (0.0% to 17.5%)                                                       | 2005 (1923 to 2094)           | 556 (535 to 578)                                                | 13.6% (11.2% to 15.9%)                                                         |



1

2

|                                  | Incidence                     |                                                             |                                                                            | Prevalence                    |                                                                 |                                                                                |
|----------------------------------|-------------------------------|-------------------------------------------------------------|----------------------------------------------------------------------------|-------------------------------|-----------------------------------------------------------------|--------------------------------------------------------------------------------|
|                                  | Numbers<br>(95% UI)<br>(2019) | Age-standardized<br>rates per 100,000<br>(95% UI)<br>(2019) | Percentage change of age-<br>standardized rates<br>(95% UI)<br>(1990–2019) | Numbers<br>(95% UI)<br>(2019) | Age-standardized<br>estimates per 100,000<br>(95% UI)<br>(2019) | Percentage change of age-<br>standardized estimates<br>(95% UI)<br>(1990–2019) |
| Bermuda                          | 140 (114 to 174)              | 243 (193 to 311)                                            | -2.8% (-9.4% to 5.2%)                                                      | 320 (305 to 338)              | 354 (336 to 374)                                                | -5.4% (-7.8% to -3.1%)                                                         |
| Cuba                             | 54214 (47783 to 62107)        | 407 (357 to 465)                                            | 9.5% (3.0% to 16.6%)                                                       | 101107 (96780 to 105693)      | 638 (611 to 666)                                                | 0.6% (-2.0% to 3.6%)                                                           |
| Dominica                         | 182 (160 to 208)              | 264 (230 to 303)                                            | 6.8% (2.6% to 10.9%)                                                       | 376 (362 to 392)              | 477 (458 to 498)                                                | 11.2% (8.8% to 13.4%)                                                          |
| Dominican Republic               | 36823 (31858 to 42425)        | 334 (290 to 382)                                            | 32.2% (26.3% to 38%)                                                       | 63528 (60735 to 66628)        | 609 (582 to 638)                                                | 30.1% (27.6% to 32.9%)                                                         |
| Grenada                          | 302 (264 to 352)              | 294 (255 to 343)                                            | 17.3% (12.4% to 22.7%)                                                     | 546 (524 to 567)              | 483 (464 to 502)                                                | 11.4% (4.8% to 16.2%)                                                          |
| Guyana                           | 2551 (2245 to 2910)           | 333 (294 to 379)                                            | 16.0% (12.5% to 19.9%)                                                     | 3823 (3675 to 3970)           | 519 (500 to 539)                                                | 20.1% (18.2% to 22.0%)                                                         |
| Haiti                            | 30690 (26357 to 36272)        | 249 (216 to 291)                                            | -0.4% (-3.1% to 2.5%)                                                      | 50055 (44426 to 58034)        | 481 (431 to 553)                                                | 25.0% (13.1% to 42.9%)                                                         |
| Jamaica                          | 7066 (6116 to 8286)           | 248 (214 to 290)                                            | 2.4% (-2.1% to 6.7%)                                                       | 12653 (12159 to 13124)        | 423 (406 to 438)                                                | 5.3% (3.7% to 7.2%)                                                            |
| Puerto Rico                      | 8553 (7022 to 10417)          | 254 (205 to 317)                                            | -7.2% (-13.7% to -0.3%)                                                    | 17797 (16960 to 18675)        | 365 (346 to 386)                                                | -11.3% (-13.6% to -8.3%)                                                       |
| Saint Kitts and Nevis            | 153 (122 to 195)              | 266 (210 to 339)                                            | 5.1% (-0.4% to 10.4%)                                                      | 243 (232 to 255)              | 356 (340 to 375)                                                | 8.4% (6.3% to 10.5%)                                                           |
| Saint Lucia                      | 491 (432 to 558)              | 282 (246 to 324)                                            | 2.7% (-2.8% to 8.0%)                                                       | 1014 (975 to 1054)            | 493 (474 to 513)                                                | 5.3% (3.3% to 7.4%)                                                            |
| Saint Vincent and the Grenadines | 306 (269 to 353)              | 270 (237 to 313)                                            | 11.1% (6.9% to 15.5%)                                                      | 574 (553 to 596)              | 450 (433 to 467)                                                | 11.3% (8.9% to 13.5%)                                                          |
| Suriname                         | 1568 (1375 to 1790)           | 275 (240 to 315)                                            | 9.3% (4.7% to 14.4%)                                                       | 2945 (2826 to 3100)           | 483 (464 to 508)                                                | 6.3% (0.5% to 9.4%)                                                            |
| Trinidad and Tobago              | 3596 (3168 to 4101)           | 264 (230 to 303)                                            | 2.1% (-6.3% to 9.1%)                                                       | 7914 (7613 to 8241)           | 475 (456 to 494)                                                | 13.9% (11.3% to 16.0%)                                                         |

40

41

42

43

44

45

46

1  
2  
3  
4  
5  
6  
7  
8  
9  
10  
11  
12  
13  
14  
15  
16  
17  
18  
19  
20  
21  
22  
23  
24  
25  
26  
27  
28  
29  
30  
31  
32  
33  
34  
35  
36  
37  
38  
39  
40  
41  
42  
43  
44  
45  
46

|                                               | Incidence                     |                                                             |                                                                            | Prevalence                    |                                                                 |                                                                                |
|-----------------------------------------------|-------------------------------|-------------------------------------------------------------|----------------------------------------------------------------------------|-------------------------------|-----------------------------------------------------------------|--------------------------------------------------------------------------------|
|                                               | Numbers<br>(95% UI)<br>(2019) | Age-standardized<br>rates per 100,000<br>(95% UI)<br>(2019) | Percentage change of age-<br>standardized rates<br>(95% UI)<br>(1990–2019) | Numbers<br>(95% UI)<br>(2019) | Age-standardized<br>estimates per 100,000<br>(95% UI)<br>(2019) | Percentage change of age-<br>standardized estimates<br>(95% UI)<br>(1990–2019) |
| United States Virgin Islands                  | 240 (196 to 296)              | 245 (196 to 308)                                            | -6.0% (-11.8% to -0.2%)                                                    | 466 (447 to 489)              | 340 (325 to 358)                                                | -13.4% (-15.2% to -11.7%)                                                      |
| <b>Tropical Latin America</b>                 | 525871 (427539 to 647705)     | 231 (187 to 286)                                            | -11.5% (-14.6% to -8.6%)                                                   | 811893 (772237 to 859923)     | 330 (314 to 350)                                                | -6.3% (-9.1% to -3.4%)                                                         |
| Brazil                                        | 504767 (408622 to 624274)     | 229 (185 to 284)                                            | -12.1% (-15.2% to -9.2%)                                                   | 777443 (739279 to 824188)     | 325 (309 to 344)                                                | -6.9% (-9.8% to -4.0%)                                                         |
| Paraguay                                      | 21104 (18266 to 24583)        | 300 (261 to 347)                                            | 5.3% (1.4% to 9.3%)                                                        | 34450 (32770 to 36316)        | 532 (507 to 560)                                                | 5.9% (3.6% to 8.1%)                                                            |
| <b>Southeast Asia, East Asia, and Oceania</b> | 5095208 (4280678 to 6104063)  | 222 (186 to 265)                                            | 23.6% (19.5% to 27.7%)                                                     | 9786362 (9269215 to 10368135) | 371 (353 to 393)                                                | 37.1% (35.1% to 39.4%)                                                         |
| <b>East Asia</b>                              | 3412591 (2824709 to 4137435)  | 207 (170 to 253)                                            | 41.5% (34.7% to 48.6%)                                                     | 6771606 (6392908 to 7230198)  | 342 (324 to 365)                                                | 56.1% (53.2% to 59.4%)                                                         |
| China                                         | 3310055 (2727619 to 4021599)  | 208 (170 to 255)                                            | 44.6% (37.5% to 52.0%)                                                     | 6546436 (6173879 to 6994611)  | 342 (324 to 365)                                                | 60.6% (57.5% to 64.1%)                                                         |
| Democratic People's Republic of Korea         | 47331 (41187 to 53742)        | 166 (145 to 188)                                            | 0.1% (-5.0% to 5.7%)                                                       | 97855 (93379 to 103039)       | 309 (294 to 325)                                                | 5.5% (3.0% to 7.8%)                                                            |
| Taiwan (Province of China)                    | 55205 (48911 to 61794)        | 193 (170 to 217)                                            | -26.4% (-30.1% to -22.3%)                                                  | 127315 (121795 to 133575)     | 367 (352 to 385)                                                | -22.3% (-24.8% to -19.9%)                                                      |
| <b>Southeast Asia</b>                         | 1653210 (1430159 to 1907523)  | 246 (213 to 284)                                            | -8.8% (-13.7% to -5.1%)                                                    | 2973675 (2820825 to 3144016)  | 438 (415 to 462)                                                | 1.8% (-0.3% to 4.1%)                                                           |
| Cambodia                                      | 43107 (37751 to 48463)        | 276 (242 to 313)                                            | 9.5% (-2.4% to 18.5%)                                                      | 71251 (65198 to 77304)        | 496 (454 to 580)                                                | 6.2% (-14.0% to 19.6%)                                                         |

1  
2  
3  
4  
5  
6  
7  
8  
9  
10  
11  
12  
13  
14  
15  
16  
17  
18  
19  
20  
21  
22  
23  
24  
25  
26  
27  
28  
29  
30  
31  
32  
33  
34  
35  
36  
37  
38  
39  
40  
41  
42  
43  
44  
45  
46

|                                      | Incidence                     |                                                             |                                                                            | Prevalence                    |                                                                 |                                                                                |
|--------------------------------------|-------------------------------|-------------------------------------------------------------|----------------------------------------------------------------------------|-------------------------------|-----------------------------------------------------------------|--------------------------------------------------------------------------------|
|                                      | Numbers<br>(95% UI)<br>(2019) | Age-standardized<br>rates per 100,000<br>(95% UI)<br>(2019) | Percentage change of age-<br>standardized rates<br>(95% UI)<br>(1990–2019) | Numbers<br>(95% UI)<br>(2019) | Age-standardized<br>estimates per 100,000<br>(95% UI)<br>(2019) | Percentage change of age-<br>standardized estimates<br>(95% UI)<br>(1990–2019) |
|                                      | 49401)                        |                                                             |                                                                            | 82969)                        |                                                                 |                                                                                |
| Indonesia                            | 491104 (399909 to<br>601380)  | 189 (155 to 232)                                            | -14.0% (-16.2% to -12.0%)                                                  | 782493 (732623 to<br>837497)  | 304 (285 to 324)                                                | -10.0% (-12.3% to -7.0%)                                                       |
| Laos People's Democratic<br>Republic | 16638 (14469 to<br>19086)     | 239 (209 to 271)                                            | -18.4% (-34.2% to -8.4%)                                                   | 25230 (24033 to<br>26580)     | 423 (404 to 444)                                                | 0.7% (-1.6% to 2.6%)                                                           |
| Malaysia                             | 96768 (84367 to<br>110145)    | 308 (268 to 349)                                            | 8.6% (3.9% to 13.6%)                                                       | 174373 (166587 to<br>183447)  | 569 (545 to 597)                                                | 10.3% (8.4% to 12.1%)                                                          |
| Maldives                             | 1059 (923 to 1218)            | 216 (188 to 248)                                            | 2.3% (-2.6% to 7.7%)                                                       | 1892 (1791 to 2003)           | 404 (385 to 425)                                                | 12.2% (8.9% to 16.2%)                                                          |
| Mauritius                            | 2646 (2190 to 3174)           | 203 (167 to 245)                                            | 10.8% (4.7% to 17.7%)                                                      | 5050 (4786 to 5334)           | 315 (299 to 333)                                                | 12.7% (10.1% to 15.3%)                                                         |
| Myanmar                              | 136589 (119324 to<br>157635)  | 257 (224 to 297)                                            | -8.6% (-12.9% to -4.6%)                                                    | 258019 (234542 to<br>289681)  | 488 (446 to 545)                                                | 11.1% (3.4% to 22.5%)                                                          |
| Philippines                          | 267241 (230496 to<br>309556)  | 246 (213 to 283)                                            | -16.3% (-23.3% to -10.9%)                                                  | 428823 (406562 to<br>454093)  | 442 (420 to 467)                                                | -4.3% (-6.4% to -2.6%)                                                         |
| Seychelles                           | 223 (184 to 267)              | 213 (174 to 257)                                            | 3.7% (-1.4% to 9.1%)                                                       | 392 (371 to 416)              | 336 (319 to 356)                                                | 10.7% (8.3% to 13.0%)                                                          |
| Sri Lanka                            | 66466 (58700 to<br>75850)     | 297 (262 to 338)                                            | -39.2% (-60.6% to -18%)                                                    | 145897 (132466 to<br>165436)  | 597 (542 to 678)                                                | 19.1% (12.1% to 28.6%)                                                         |
| Thailand                             | 206998 (181911 to<br>233050)  | 273 (240 to 309)                                            | -15.7% (-20% to -11.4%)                                                    | 476782 (454192 to<br>501115)  | 511 (488 to 538)                                                | -12.8% (-14.5% to -11%)                                                        |
| Timor-Leste                          | 2700 (2342 to 3110)           | 216 (189 to 246)                                            | -39.8% (-62% to -16.5%)                                                    | 4998 (4249 to 6138)           | 510 (431 to 630)                                                | 5.0% (0.4% to 9.4%)                                                            |
| Viet Nam                             | 319503 (279955 to<br>369051)  | 330 (290 to 374)                                            | 24.8% (19.2% to 30.6%)                                                     | 594579 (567714 to<br>621444)  | 579 (555 to 607)                                                | 28.8% (26.6% to 31.3%)                                                         |

1  
2  
3  
4  
5  
6  
7  
8  
9  
10  
11  
12  
13  
14  
15  
16  
17  
18  
19  
20  
21  
22  
23  
24  
25  
26  
27  
28  
29  
30  
31  
32  
33  
34  
35  
36  
37  
38  
39  
40  
41  
42  
43  
44  
45  
46

|                                  | Incidence                     |                                                             |                                                                            | Prevalence                    |                                                                 |                                                                                |
|----------------------------------|-------------------------------|-------------------------------------------------------------|----------------------------------------------------------------------------|-------------------------------|-----------------------------------------------------------------|--------------------------------------------------------------------------------|
|                                  | Numbers<br>(95% UI)<br>(2019) | Age-standardized<br>rates per 100,000<br>(95% UI)<br>(2019) | Percentage change of age-<br>standardized rates<br>(95% UI)<br>(1990–2019) | Numbers<br>(95% UI)<br>(2019) | Age-standardized<br>estimates per 100,000<br>(95% UI)<br>(2019) | Percentage change of age-<br>standardized estimates<br>(95% UI)<br>(1990–2019) |
|                                  | 361856)                       |                                                             |                                                                            | 624209)                       |                                                                 |                                                                                |
| <b>Oceania</b>                   | 29408 (25561 to<br>33939)     | 244 (214 to 280)                                            | 14.8% (11.1% to 18.8%)                                                     | 41081 (38963 to<br>43478)     | 406 (386 to 428)                                                | 20.1% (17.6% to 23.8%)                                                         |
| American Samoa                   | 91 (75 to 111)                | 168 (138 to 203)                                            | -10.3% (-14.0% to -5.9%)                                                   | 145 (133 to 158)              | 277 (255 to 303)                                                | 0.0% (-5.3% to 8.4%)                                                           |
| Cook Islands                     | 35 (29 to 42)                 | 192 (156 to 234)                                            | -16.3% (-22.5% to -9.8%)                                                   | 66 (63 to 71)                 | 306 (290 to 325)                                                | -11.1% (-12.6% to -9.6%)                                                       |
| Fiji                             | 1638 (1431 to 1875)           | 184 (161 to 210)                                            | 4.2% (0.7% to 7.8%)                                                        | 2753 (2628 to 2897)           | 313 (299 to 329)                                                | 6.1% (4.2% to 8.2%)                                                            |
| Guam                             | 298 (247 to 363)              | 176 (145 to 214)                                            | -11.2% (-15.7% to -6.9%)                                                   | 507 (481 to 536)              | 277 (263 to 293)                                                | -11.2% (-12.8% to -9.7%)                                                       |
| Kiribati                         | 179 (155 to 207)              | 155 (134 to 176)                                            | 3.1% (-0.8% to 7.4%)                                                       | 243 (231 to 256)              | 247 (236 to 259)                                                | 5.7% (3.2% to 8.1%)                                                            |
| Marshall Islands                 | 117 (102 to 134)              | 217 (190 to 247)                                            | 4.3% (1.0% to 7.9%)                                                        | 170 (162 to 179)              | 353 (338 to 371)                                                | 4.4% (2.8% to 5.9%)                                                            |
| Micronesia (Federated States of) | 220 (191 to 253)              | 227 (198 to 259)                                            | 7.6% (3.8% to 11.6%)                                                       | 329 (312 to 349)              | 369 (351 to 389)                                                | 8.7% (6.2% to 11.6%)                                                           |
| Nauru                            | 20 (17 to 25)                 | 199 (164 to 240)                                            | 1.7% (-2.4% to 5.9%)                                                       | 22 (21 to 23)                 | 289 (274 to 307)                                                | -0.5% (-1.8% to 0.8%)                                                          |
| Niue                             | 3 (2 to 4)                    | 176 (145 to 215)                                            | 0.1% (-4.3% to 5.0%)                                                       | 5 (5 to 6)                    | 278 (261 to 297)                                                | 5.1% (1.9% to 9.5%)                                                            |
| Northern Mariana Islands         | 88 (73 to 108)                | 205 (168 to 250)                                            | -16.1% (-20.5% to -10.7%)                                                  | 160 (152 to 170)              | 305 (290 to 322)                                                | -19% (-21% to -17.2%)                                                          |
| Palau                            | 46 (38 to 56)                 | 249 (205 to 303)                                            | 4.8% (0.9% to 9.0%)                                                        | 73 (69 to 78)                 | 332 (314 to 351)                                                | 3.9% (2.1% to 5.5%)                                                            |
| Papua New Guinea                 | 22541 (19552 to<br>26063)     | 259 (227 to 298)                                            | 17.5% (12.8% to 22.3%)                                                     | 30861 (29214 to<br>32771)     | 432 (410 to 456)                                                | 23.5% (20.6% to 27.7%)                                                         |
| Samoa                            | 459 (398 to 531)              | 232 (202 to 265)                                            | -2.8% (-10.4% to 3.5%)                                                     | 772 (719 to 838)              | 439 (411 to 474)                                                | 21.7% (16.2% to 30.1%)                                                         |
| Solomon Islands                  | 1541 (1334 to 1813)           | 270 (235 to 315)                                            | 9.9% (5.7% to 14.3%)                                                       | 1914 (1818 to 2024)           | 411 (392 to 433)                                                | 12.4% (10.1% to 15%)                                                           |
| Tokelau                          | 2 (2 to 3)                    | 167 (138 to 203)                                            | 4.3% (0.1% to 9.2%)                                                        | 3 (3 to 4)                    | 255 (241 to 271)                                                | 6.4% (5.1% to 7.8%)                                                            |
| Tonga                            | 176 (153 to 203)              | 180 (156 to 206)                                            | -5.7% (-10.8% to -0.4%)                                                    | 277 (264 to 290)              | 317 (303 to 333)                                                | 0.6% (-2.1% to 3.1%)                                                           |

1  
2  
3  
4  
5  
6  
7  
8  
9  
10  
11  
12  
13  
14  
15  
16  
17  
18  
19  
20  
21  
22  
23  
24  
25  
26  
27  
28  
29  
30  
31  
32  
33  
34  
35  
36  
37  
38  
39  
40  
41  
42  
43  
44  
45  
46

|                              | Incidence                     |                                                             |                                                                            | Prevalence                    |                                                                 |                                                                                |
|------------------------------|-------------------------------|-------------------------------------------------------------|----------------------------------------------------------------------------|-------------------------------|-----------------------------------------------------------------|--------------------------------------------------------------------------------|
|                              | Numbers<br>(95% UI)<br>(2019) | Age-standardized<br>rates per 100,000<br>(95% UI)<br>(2019) | Percentage change of age-<br>standardized rates<br>(95% UI)<br>(1990–2019) | Numbers<br>(95% UI)<br>(2019) | Age-standardized<br>estimates per 100,000<br>(95% UI)<br>(2019) | Percentage change of age-<br>standardized estimates<br>(95% UI)<br>(1990–2019) |
| Tuvalu                       | 20 (17 to 24)                 | 171 (142 to 208)                                            | 8.3% (4.6% to 12.0%)                                                       | 28 (27 to 30)                 | 256 (241 to 273)                                                | 16.6% (12.9% to 21.9%)                                                         |
| Vanuatu                      | 544 (472 to 630)              | 197 (172 to 225)                                            | 5.5% (1.0% to 10.9%)                                                       | 812 (766 to 870)              | 354 (334 to 377)                                                | 6.7% (5.2% to 8.3%)                                                            |
| North Africa and Middle East | 1911495 (1624871 to 2305162)  | 319 (272 to 382)                                            | -14.5% (-24.8% to -4.0%)                                                   | 3096882 (2843657 to 3481267)  | 552 (507 to 619)                                                | 2.4% (-3.3% to 5.7%)                                                           |
| North Africa and Middle East | 1911495 (1624871 to 2305162)  | 319 (272 to 382)                                            | -14.5% (-24.8% to -4.0%)                                                   | 3096882 (2843657 to 3481267)  | 552 (507 to 619)                                                | 2.4% (-3.3% to 5.7%)                                                           |
| Afghanistan                  | 172744 (114294 to 298507)     | 572 (347 to 1015)                                           | 89.2% (38.3% to 157.5%)                                                    | 182536 (119628 to 305576)     | 775 (486 to 1367)                                               | -17.9% (-42.8% to 24.8%)                                                       |
| Algeria                      | 109818 (95425 to 126366)      | 266 (231 to 306)                                            | -13.1% (-17.2% to -8.7%)                                                   | 202606 (192787 to 214115)     | 503 (480 to 530)                                                | -9.8% (-12.0% to -7.0%)                                                        |
| Bahrain                      | 3605 (3131 to 4160)           | 259 (224 to 299)                                            | -0.7% (-5.5% to 4.4%)                                                      | 8331 (7910 to 8808)           | 487 (465 to 512)                                                | 4.2% (1.5% to 7.2%)                                                            |
| Egypt                        | 222467 (191763 to 257387)     | 230 (199 to 264)                                            | 5.3% (0.5% to 10.6%)                                                       | 337571 (322203 to 354072)     | 397 (379 to 415)                                                | 4.3% (1.7% to 7.0%)                                                            |
| Iran (Islamic Republic of)   | 224769 (194553 to 259552)     | 267 (232 to 309)                                            | -67.8% (-75.7% to -58%)                                                    | 478928 (445665 to 520699)     | 550 (513 to 595)                                                | -27.4% (-34.4% to -22.2%)                                                      |
| Iraq                         | 140292 (119415 to 166064)     | 321 (276 to 376)                                            | -18.8% (-27.5% to -12.2%)                                                  | 261206 (207437 to 347346)     | 750 (597 to 996)                                                | -21.7% (-31.2% to -12.7%)                                                      |
| Jordan                       | 26039 (22338 to 30461)        | 223 (194 to 259)                                            | -5.9% (-10.0% to -1.2%)                                                    | 39421 (37539 to 41373)        | 403 (386 to 422)                                                | -3.6% (-5.7% to -1.6%)                                                         |
| Kuwait                       | 12537 (10826 to 14248)        | 280 (243 to 324)                                            | -58.2% (-76.0% to -37.2%)                                                  | 24948 (23651 to 26245)        | 550 (524 to 579)                                                | -11.6% (-17.4% to -7.7%)                                                       |

1  
2  
3  
4  
5  
6  
7  
8  
9  
10  
11  
12  
13  
14  
15  
16  
17  
18  
19  
20  
21  
22  
23  
24  
25  
26  
27  
28  
29  
30  
31  
32  
33  
34  
35  
36  
37  
38  
39  
40  
41  
42  
43  
44  
45  
46

|                      | Incidence                     |                                                             |                                                                            | Prevalence                    |                                                                 |                                                                                |
|----------------------|-------------------------------|-------------------------------------------------------------|----------------------------------------------------------------------------|-------------------------------|-----------------------------------------------------------------|--------------------------------------------------------------------------------|
|                      | Numbers<br>(95% UI)<br>(2019) | Age-standardized<br>rates per 100,000<br>(95% UI)<br>(2019) | Percentage change of age-<br>standardized rates<br>(95% UI)<br>(1990–2019) | Numbers<br>(95% UI)<br>(2019) | Age-standardized<br>estimates per 100,000<br>(95% UI)<br>(2019) | Percentage change of age-<br>standardized estimates<br>(95% UI)<br>(1990–2019) |
|                      | 14617)                        |                                                             |                                                                            | 26471)                        |                                                                 |                                                                                |
| Lebanon              | 12783 (11084 to<br>14829)     | 248 (215 to 288)                                            | -40.8% (-59.4% to -23.5%)                                                  | 28045 (23771 to<br>37081)     | 528 (447 to 700)                                                | -30.9% (-42.9% to -19.1%)                                                      |
| Libya                | 26776 (22306 to<br>34151)     | 385 (320 to 494)                                            | 30.4% (12.6% to 66.0%)                                                     | 43130 (39583 to<br>47930)     | 627 (579 to 694)                                                | 11.6% (5.9% to 19.3%)                                                          |
| Morocco              | 102188 (88863 to<br>118831)   | 286 (250 to 331)                                            | 1.7% (-2.5% to 5.9%)                                                       | 179475 (171427 to<br>188308)  | 503 (481 to 528)                                                | 2.9% (0.2% to 5.0%)                                                            |
| Oman                 | 17119 (14700 to<br>19857)     | 386 (336 to 438)                                            | -7.2% (-11.9% to -2.0%)                                                    | 28135 (26674 to<br>29779)     | 679 (649 to 713)                                                | -5.0% (-7.1% to -3.1%)                                                         |
| Palestine            | 12633 (10861 to<br>14734)     | 255 (221 to 296)                                            | -31.7% (-53.3% to -12.3%)                                                  | 26166 (19893 to<br>36241)     | 688 (527 to 948)                                                | 11.7% (4.9% to 17.8%)                                                          |
| Qatar                | 11890 (10081 to<br>14150)     | 374 (325 to 434)                                            | -9.9% (-14.5% to -5.1%)                                                    | 18974 (17875 to<br>20194)     | 664 (632 to 701)                                                | -9.7% (-11.8% to -7.3%)                                                        |
| Saudi Arabia         | 242222 (207011 to<br>286739)  | 628 (542 to 735)                                            | 25.6% (19.3% to 32.2%)                                                     | 369775 (344765 to<br>397295)  | 1071 (1008 to 1140)                                             | 25.5% (22.3% to 28.3%)                                                         |
| Sudan                | 69744 (56092 to<br>87454)     | 172 (141 to 213)                                            | -40.5% (-64.4% to -16.4%)                                                  | 76842 (69587 to<br>87305)     | 268 (244 to 304)                                                | 5.2% (0.6% to 10.1%)                                                           |
| Syrian Arab Republic | 52830 (39544 to<br>76766)     | 414 (297 to 626)                                            | 95.4% (43.6% to 192.7%)                                                    | 111858 (77475 to<br>171069)   | 834 (566 to 1291)                                               | 118.2% (55.8% to 220.8%)                                                       |
| Tunisia              | 31759 (27629 to<br>36099)     | 274 (238 to 317)                                            | 3.3% (-1.0% to 8.1%)                                                       | 63641 (60813 to<br>66469)     | 496 (474 to 519)                                                | 4.0% (1.9% to 6.4%)                                                            |

1  
2  
3  
4  
5  
6  
7  
8  
9  
10  
11  
12  
13  
14  
15  
16  
17  
18  
19  
20  
21  
22  
23  
24  
25  
26  
27  
28  
29  
30  
31  
32  
33  
34  
35  
36  
37  
38  
39  
40  
41  
42  
43  
44  
45  
46

|                      | Incidence                        |                                                             |                                                                            | Prevalence                         |                                                                 |                                                                                |
|----------------------|----------------------------------|-------------------------------------------------------------|----------------------------------------------------------------------------|------------------------------------|-----------------------------------------------------------------|--------------------------------------------------------------------------------|
|                      | Numbers<br>(95% UI)<br>(2019)    | Age-standardized<br>rates per 100,000<br>(95% UI)<br>(2019) | Percentage change of age-<br>standardized rates<br>(95% UI)<br>(1990–2019) | Numbers<br>(95% UI)<br>(2019)      | Age-standardized<br>estimates per 100,000<br>(95% UI)<br>(2019) | Percentage change of age-<br>standardized estimates<br>(95% UI)<br>(1990–2019) |
|                      | 36591)                           |                                                             |                                                                            | 66654)                             |                                                                 |                                                                                |
| Turkey               | 219256 (191556 to<br>254991)     | 265 (232 to 308)                                            | 12.5% (5.2% to 20.0%)                                                      | 428134 (407264 to<br>451661)       | 471 (449 to 496)                                                | 19.6% (16.1% to 24.1%)                                                         |
| United Arab Emirates | 33183 (28455 to<br>38552)        | 330 (286 to 378)                                            | -7.6% (-11.2% to -3.8%)                                                    | 66292 (62592 to<br>70302)          | 594 (567 to 624)                                                | -4.4% (-6.7% to -2.6%)                                                         |
| Yemen                | 164898 (108336 to<br>287669)     | 496 (338 to 841)                                            | 98.1% (35.1% to 236.3%)                                                    | 117721 (101299 to<br>141736)       | 525 (456 to 626)                                                | 18.9% (7.1% to 35.6%)                                                          |
| South Asia           | 8775756 (7523034 to<br>10153936) | 508 (438 to 587)                                            | 13.1% (9.7% to 16.1%)                                                      | 14952502 (14136245<br>to 15831814) | 932 (881 to 986)                                                | 24.2% (22.8% to 25.6%)                                                         |
| South Asia           | 8775756 (7523034 to<br>10153936) | 508 (438 to 587)                                            | 13.1% (9.7% to 16.1%)                                                      | 14952502 (14136245<br>to 15831814) | 932 (881 to 986)                                                | 24.2% (22.8% to 25.6%)                                                         |
| Bangladesh           | 498953 (428415 to<br>575427)     | 308 (266 to 353)                                            | 10.8% (6.4% to 15.7%)                                                      | 924863 (871564 to<br>977129)       | 616 (581 to 651)                                                | 21.8% (19.0% to 24.2%)                                                         |
| Bhutan               | 3152 (2726 to 3617)              | 419 (366 to 478)                                            | 20.5% (14.9% to 26.4%)                                                     | 5406 (5119 to 5727)                | 791 (752 to 835)                                                | 28.7% (26.2% to 31.0%)                                                         |
| India                | 7464821 (6383527 to<br>8667434)  | 554 (476 to 641)                                            | 11.1% (7.3% to 14.3%)                                                      | 12795681 (12085618<br>to 13557100) | 1002 (947 to 1060)                                              | 22.4% (21.0% to 23.9%)                                                         |
| Nepal                | 108778 (94776 to<br>125460)      | 369 (323 to 422)                                            | 9.2% (5.7% to 12.4%)                                                       | 176164 (167511 to<br>186265)       | 673 (641 to 708)                                                | 20.4% (17.3% to 24.2%)                                                         |
| Pakistan             | 700052 (592408 to<br>822394)     | 337 (287 to 390)                                            | 26.7% (22.8% to 30.3%)                                                     | 1050389 (989822 to<br>1114093)     | 652 (617 to 692)                                                | 36.0% (33.6% to 38.9%)                                                         |

1

2

3

4

5

6

7

8

9

10

11

12

13

14

15

16

17

18

19

20

21

22

23

24

25

26

27

28

29

30

31

32

33

34

35

36

37

38

39

40

41

42

43

44

45

46

|                                    | Incidence                     |                                                             |                                                                            | Prevalence                    |                                                                 |                                                                                |
|------------------------------------|-------------------------------|-------------------------------------------------------------|----------------------------------------------------------------------------|-------------------------------|-----------------------------------------------------------------|--------------------------------------------------------------------------------|
|                                    | Numbers<br>(95% UI)<br>(2019) | Age-standardized<br>rates per 100,000<br>(95% UI)<br>(2019) | Percentage change of age-<br>standardized rates<br>(95% UI)<br>(1990–2019) | Numbers<br>(95% UI)<br>(2019) | Age-standardized<br>estimates per 100,000<br>(95% UI)<br>(2019) | Percentage change of age-<br>standardized estimates<br>(95% UI)<br>(1990–2019) |
| <b>Sub-Saharan Africa</b>          | 2216929 (1852407 to 2642459)  | 231 (195 to 272)                                            | -29.7% (-47.0% to -15.2%)                                                  | 2643504 (2466427 to 2859292)  | 385 (361 to 415)                                                | 0.4% (-2.0% to 2.0%)                                                           |
| <b>Southern Sub-Saharan Africa</b> | 147127 (120571 to 177386)     | 190 (157 to 230)                                            | -18.4% (-21.4% to -15.8%)                                                  | 194888 (183354 to 208477)     | 286 (270 to 306)                                                | -21.4% (-22.7% to -20.1%)                                                      |
| Botswana                           | 4653 (3836 to 5610)           | 202 (168 to 244)                                            | 15.3% (9.5% to 20.7%)                                                      | 5731 (5393 to 6094)           | 292 (276 to 310)                                                | 20.6% (18.7% to 22.7%)                                                         |
| Eswatini                           | 2178 (1798 to 2635)           | 199 (165 to 238)                                            | 13.4% (8.6% to 18.4%)                                                      | 2307 (2179 to 2452)           | 274 (260 to 292)                                                | 8.9% (7.2% to 10.8%)                                                           |
| Lesotho                            | 4350 (3601 to 5251)           | 212 (177 to 254)                                            | 29.1% (22.4% to 35.8%)                                                     | 4746 (4474 to 5042)           | 279 (264 to 296)                                                | 26.8% (24.6% to 29.4%)                                                         |
| Namibia                            | 4813 (3964 to 5787)           | 210 (174 to 251)                                            | 4.7% (0.9% to 9.1%)                                                        | 6029 (5640 to 6500)           | 328 (307 to 354)                                                | -1.2% (-8.6% to 4.2%)                                                          |
| South Africa                       | 108940 (88449 to 131433)      | 195 (159 to 235)                                            | -24.4% (-27.7% to -21.5%)                                                  | 154867 (145551 to 165941)     | 298 (281 to 320)                                                | -26.5% (-28.0% to -25.1%)                                                      |
| Zimbabwe                           | 22193 (18083 to 27027)        | 160 (133 to 193)                                            | -0.7% (-6.1% to 7.4%)                                                      | 21208 (20122 to 22513)        | 210 (200 to 222)                                                | -8.3% (-10.1% to -6.6%)                                                        |
| <b>Western Sub-Saharan Africa</b>  | 911247 (745370 to 1110360)    | 233 (194 to 277)                                            | 3.6% (-0.4% to 6.6%)                                                       | 1015292 (956643 to 1081707)   | 369 (348 to 392)                                                | 11.8% (10.9% to 13.2%)                                                         |
| Benin                              | 25317 (20605 to 30904)        | 238 (197 to 287)                                            | 4.2% (0.5% to 8.8%)                                                        | 27620 (26060 to 29366)        | 380 (359 to 403)                                                | 7.9% (6.3% to 9.8%)                                                            |
| Burkina Faso                       | 51473 (42015 to 62572)        | 271 (224 to 327)                                            | 23.9% (16.6% to 35.9%)                                                     | 53183 (50128 to 56778)        | 405 (382 to 429)                                                | 23.4% (21.6% to 25.3%)                                                         |
| Cabo Verde                         | 1224 (1005 to 1456)           | 220 (182 to 260)                                            | 19.3% (14.5% to 24.5%)                                                     | 1773 (1679 to 1885)           | 354 (337 to 376)                                                | 22.3% (20.8% to 24.0%)                                                         |
| Cameroon                           | 72858 (58673 to 88643)        | 290 (239 to 352)                                            | 11.3% (5.6% to 18.6%)                                                      | 81374 (76604 to 86144)        | 452 (427 to 482)                                                | 7.1% (5.3% to 9.0%)                                                            |

45



1  
2  
3  
4  
5  
6  
7  
8  
9  
10  
11  
12  
13  
14  
15  
16  
17  
18  
19  
20  
21  
22  
23  
24  
25  
26  
27  
28  
29  
30  
31  
32  
33  
34  
35  
36  
37  
38  
39  
40  
41  
42  
43  
44  
45  
46

|               | Incidence                     |                                                             |                                                                            | Prevalence                    |                                                                 |                                                                                |
|---------------|-------------------------------|-------------------------------------------------------------|----------------------------------------------------------------------------|-------------------------------|-----------------------------------------------------------------|--------------------------------------------------------------------------------|
|               | Numbers<br>(95% UI)<br>(2019) | Age-standardized<br>rates per 100,000<br>(95% UI)<br>(2019) | Percentage change of age-<br>standardized rates<br>(95% UI)<br>(1990–2019) | Numbers<br>(95% UI)<br>(2019) | Age-standardized<br>estimates per 100,000<br>(95% UI)<br>(2019) | Percentage change of age-<br>standardized estimates<br>(95% UI)<br>(1990–2019) |
|               | 89401)                        |                                                             |                                                                            | 86776)                        |                                                                 |                                                                                |
| Chad          | 32204 (26198 to<br>38993)     | 241 (201 to 289)                                            | -3.7% (-23.2% to 10.8%)                                                    | 33024 (30732 to<br>35901)     | 392 (366 to 424)                                                | 17.2% (10.9% to 21.6%)                                                         |
| Côte d'Ivoire | 54433 (44435 to<br>65820)     | 245 (203 to 294)                                            | -0.3% (-3.9% to 3.6%)                                                      | 62791 (59003 to<br>66694)     | 383 (362 to 405)                                                | 4.0% (2.4% to 5.8%)                                                            |
| Gambia        | 4001 (3257 to 4890)           | 209 (173 to 250)                                            | 6.3% (3.1% to 9.8%)                                                        | 4441 (4183 to 4719)           | 325 (308 to 345)                                                | 5.4% (3.1% to 7.5%)                                                            |
| Ghana         | 82612 (67111 to<br>100632)    | 281 (230 to 341)                                            | 19.5% (15.0% to 24.4%)                                                     | 105387 (98549 to<br>112825)   | 459 (430 to 490)                                                | 21.6% (19.5% to 23.4%)                                                         |
| Guinea        | 26064 (21153 to<br>31734)     | 244 (201 to 293)                                            | 13.7% (8.8% to 18.5%)                                                      | 29370 (27691 to<br>31229)     | 388 (366 to 412)                                                | 17.1% (15.3% to 18.8%)                                                         |
| Guinea-Bissau | 4638 (3724 to 5718)           | 271 (220 to 329)                                            | -0.7% (-4.6% to 3.2%)                                                      | 5186 (4841 to 5555)           | 435 (408 to 465)                                                | 5.7% (3.9% to 8.0%)                                                            |
| Liberia       | 8013 (6513 to 9752)           | 190 (157 to 229)                                            | -80.7% (-91.5% to -56.7%)                                                  | 11219 (9845 to<br>13311)      | 356 (316 to 417)                                                | -8.6% (-24.3% to 2.7%)                                                         |
| Mali          | 44120 (35428 to<br>55449)     | 236 (193 to 290)                                            | -3.3% (-9.3% to 1.5%)                                                      | 45061 (41639 to<br>49459)     | 366 (341 to 396)                                                | 12.3% (8.3% to 19.1%)                                                          |
| Mauritania    | 9567 (7760 to 11677)          | 263 (216 to 320)                                            | -13.2% (-17.7% to -8.6%)                                                   | 12375 (11593 to<br>13199)     | 455 (426 to 485)                                                | -6.3% (-7.6% to -5.0%)                                                         |
| Niger         | 41182 (33534 to<br>50198)     | 217 (181 to 258)                                            | -0.9% (-4.8% to 2.7%)                                                      | 39131 (36861 to<br>41586)     | 333 (316 to 353)                                                | 5.0% (3.6% to 6.5%)                                                            |
| Nigeria       | 389966 (316281 to             | 212 (175 to 257)                                            | 7.3% (3.5% to 13.0%)                                                       | 424532 (399558 to             | 333 (315 to 354)                                                | 10.1% (8.7% to 12.1%)                                                          |

1  
2  
3  
4  
5  
6  
7  
8  
9  
10  
11  
12  
13  
14  
15  
16  
17  
18  
19  
20  
21  
22  
23  
24  
25  
26  
27  
28  
29  
30  
31  
32  
33  
34  
35  
36  
37  
38  
39  
40  
41  
42  
43  
44  
45  
46

|                                   | Incidence                     |                                                             |                                                                            | Prevalence                    |                                                                 |                                                                                |
|-----------------------------------|-------------------------------|-------------------------------------------------------------|----------------------------------------------------------------------------|-------------------------------|-----------------------------------------------------------------|--------------------------------------------------------------------------------|
|                                   | Numbers<br>(95% UI)<br>(2019) | Age-standardized<br>rates per 100,000<br>(95% UI)<br>(2019) | Percentage change of age-<br>standardized rates<br>(95% UI)<br>(1990–2019) | Numbers<br>(95% UI)<br>(2019) | Age-standardized<br>estimates per 100,000<br>(95% UI)<br>(2019) | Percentage change of age-<br>standardized estimates<br>(95% UI)<br>(1990–2019) |
|                                   | 480854)                       |                                                             |                                                                            | 453038)                       |                                                                 |                                                                                |
| Sao Tome and Principe             | 463 (378 to 558)              | 247 (204 to 295)                                            | 17.6% (13.2% to 22.4%)                                                     | 566 (532 to 600)              | 388 (366 to 412)                                                | 21.5% (19.6% to 23.4%)                                                         |
| Senegal                           | 28943 (23477 to 35172)        | 218 (179 to 261)                                            | 1.4% (-4.0% to 6.0%)                                                       | 34930 (32773 to 37093)        | 353 (331 to 374)                                                | 8.8% (7.1% to 10.5%)                                                           |
| Sierra Leone                      | 16290 (13229 to 19977)        | 226 (187 to 274)                                            | 8.1% (3.7% to 12.2%)                                                       | 21506 (19609 to 24323)        | 407 (375 to 455)                                                | 27.4% (19.7% to 40.9%)                                                         |
| Togo                              | 17866 (14519 to 21873)        | 244 (201 to 296)                                            | 2.8% (-1.3% to 6.4%)                                                       | 21809 (20468 to 23233)        | 395 (372 to 420)                                                | 3.9% (2.6% to 5.3%)                                                            |
| <b>Eastern Sub-Saharan Africa</b> | 904591 (757646 to 1080346)    | 246 (209 to 286)                                            | -49.8% (-67.5% to -30.4%)                                                  | 1094872 (1008201 to 1210322)  | 428 (397 to 471)                                                | -5.0% (-10.1% to -2.1%)                                                        |
| Burundi                           | 29122 (24824 to 33800)        | 281 (243 to 322)                                            | -7.6% (-10.8% to -4.0%)                                                    | 60908 (45647 to 85359)        | 789 (603 to 1086)                                               | 71.9% (31.1% to 140.3%)                                                        |
| Comoros                           | 2099 (1712 to 2554)           | 302 (248 to 365)                                            | -0.6% (-5.0% to 4.0%)                                                      | 2971 (2793 to 3151)           | 499 (470 to 528)                                                | 4.2% (2.7% to 5.6%)                                                            |
| Djibouti                          | 2864 (2318 to 3491)           | 255 (211 to 310)                                            | -19.5% (-35.4% to -7.4%)                                                   | 3775 (3543 to 4045)           | 416 (392 to 443)                                                | 1.0% (-1.2% to 3.2%)                                                           |
| Eritrea                           | 15655 (12704 to 19149)        | 254 (210 to 305)                                            | -82% (-92.1% to -58%)                                                      | 23159 (18819 to 30609)        | 538 (430 to 725)                                                | -30.5% (-44.6% to -12.2%)                                                      |
| Ethiopia                          | 232073 (198395 to 270172)     | 249 (218 to 284)                                            | -75.5% (-86.6% to -58.1%)                                                  | 312469 (285987 to 352276)     | 480 (441 to 539)                                                | -19.0% (-28.0% to -12.5%)                                                      |
| Kenya                             | 114355 (98124 to 132513)      | 259 (225 to 295)                                            | 1.8% (0.8% to 2.7%)                                                        | 148313 (140229 to 156661)     | 437 (416 to 461)                                                | 4.4% (3.5% to 5.6%)                                                            |

1  
2  
3  
4  
5  
6  
7  
8  
9  
10  
11  
12  
13  
14  
15  
16  
17  
18  
19  
20  
21  
22  
23  
24  
25  
26  
27  
28  
29  
30  
31  
32  
33  
34  
35  
36  
37  
38  
39  
40  
41  
42  
43  
44  
45  
46

|                             | Incidence                     |                                                             |                                                                            | Prevalence                    |                                                                 |                                                                                |
|-----------------------------|-------------------------------|-------------------------------------------------------------|----------------------------------------------------------------------------|-------------------------------|-----------------------------------------------------------------|--------------------------------------------------------------------------------|
|                             | Numbers<br>(95% UI)<br>(2019) | Age-standardized<br>rates per 100,000<br>(95% UI)<br>(2019) | Percentage change of age-<br>standardized rates<br>(95% UI)<br>(1990–2019) | Numbers<br>(95% UI)<br>(2019) | Age-standardized<br>estimates per 100,000<br>(95% UI)<br>(2019) | Percentage change of age-<br>standardized estimates<br>(95% UI)<br>(1990–2019) |
| Madagascar                  | 57866 (47018 to 70749)        | 233 (192 to 279)                                            | -8.5% (-12.3% to -4.0%)                                                    | 62457 (58392 to 66781)        | 357 (336 to 380)                                                | -7.5% (-9.0% to -6.0%)                                                         |
| Malawi                      | 33959 (27334 to 42233)        | 197 (162 to 238)                                            | -3.3% (-6.9% to 0.5%)                                                      | 33843 (31621 to 36156)        | 292 (274 to 310)                                                | -0.6% (-2.2% to 0.8%)                                                          |
| Mozambique                  | 79887 (64958 to 97654)        | 318 (261 to 381)                                            | -5.2% (-31.8% to 12.2%)                                                    | 82974 (76744 to 91370)        | 496 (460 to 552)                                                | -1.0% (-13.9% to 9.1%)                                                         |
| Rwanda                      | 30616 (24797 to 37465)        | 259 (213 to 313)                                            | -47.6% (-65.9% to -31.3%)                                                  | 47538 (39579 to 62410)        | 540 (451 to 701)                                                | 7.9% (-7.7% to 41.3%)                                                          |
| Somalia                     | 50001 (39176 to 66334)        | 267 (215 to 343)                                            | -34.2% (-53.7% to -13.8%)                                                  | 45237 (40209 to 53126)        | 375 (339 to 433)                                                | 5.4% (-8.1% to 13.4%)                                                          |
| South Sudan                 | 23374 (18761 to 29502)        | 275 (227 to 342)                                            | 0.3% (-6.9% to 14.1%)                                                      | 26382 (23597 to 30638)        | 453 (411 to 514)                                                | 1.0% (-3.6% to 8.3%)                                                           |
| Uganda                      | 85312 (69281 to 105407)       | 230 (191 to 275)                                            | -6.6% (-18.4% to 0.9%)                                                     | 88572 (81633 to 97593)        | 383 (353 to 427)                                                | 0.6% (-10.5% to 9.4%)                                                          |
| United Republic of Tanzania | 113661 (92406 to 139892)      | 216 (180 to 261)                                            | -3.9% (-7.5% to -0.3%)                                                     | 122702 (115238 to 130321)     | 338 (320 to 357)                                                | 2.1% (0.6% to 3.4%)                                                            |
| Zambia                      | 33022 (26718 to 40468)        | 199 (165 to 239)                                            | -0.9% (-5.2% to 3.4%)                                                      | 32697 (30668 to 34830)        | 291 (275 to 308)                                                | 4.2% (2.7% to 5.7%)                                                            |
| Central Sub-Saharan Africa  | 253964 (218605 to 293993)     | 217 (189 to 246)                                            | -11.3% (-19.9% to -5.1%)                                                   | 338451 (308212 to 380779)     | 396 (363 to 441)                                                | 7.8% (4.6% to 12.2%)                                                           |

1  
2  
3  
4  
5  
6  
7  
8  
9  
10  
11  
12  
13  
14  
15  
16  
17  
18  
19  
20  
21  
22  
23  
24

|                                  | Incidence                     |                                                             |                                                                            | Prevalence                    |                                                                 |                                                                                |
|----------------------------------|-------------------------------|-------------------------------------------------------------|----------------------------------------------------------------------------|-------------------------------|-----------------------------------------------------------------|--------------------------------------------------------------------------------|
|                                  | Numbers<br>(95% UI)<br>(2019) | Age-standardized<br>rates per 100,000<br>(95% UI)<br>(2019) | Percentage change of age-<br>standardized rates<br>(95% UI)<br>(1990–2019) | Numbers<br>(95% UI)<br>(2019) | Age-standardized<br>estimates per 100,000<br>(95% UI)<br>(2019) | Percentage change of age-<br>standardized estimates<br>(95% UI)<br>(1990–2019) |
| Angola                           | 56663 (48838 to 65681)        | 218 (190 to 247)                                            | -43% (-63.3% to -22.5%)                                                    | 84342 (74531 to 99345)        | 461 (406 to 544)                                                | -4.3% (-11% to 1.6%)                                                           |
| Central African Republic         | 12095 (9996 to 15534)         | 243 (205 to 301)                                            | 26.6% (13.1% to 54.7%)                                                     | 14127 (12332 to 16792)        | 372 (333 to 427)                                                | 30.0% (18.1% to 50.3%)                                                         |
| Congo                            | 9480 (8121 to 10899)          | 200 (173 to 227)                                            | -7.3% (-10.2% to -4.3%)                                                    | 15760 (13995 to 18395)        | 397 (356 to 455)                                                | 18.2% (7.6% to 34.6%)                                                          |
| Democratic Republic of the Congo | 169290 (145141 to 197215)     | 215 (188 to 247)                                            | 1.2% (-2.9% to 7.3%)                                                       | 215440 (199080 to 237463)     | 376 (350 to 409)                                                | 9.5% (4.2% to 17.7%)                                                           |
| Equatorial Guinea                | 2665 (2278 to 3133)           | 211 (184 to 242)                                            | 5.9% (1.1% to 10.6%)                                                       | 3166 (3003 to 3328)           | 358 (341 to 376)                                                | 17.2% (14.9% to 19.4%)                                                         |
| Gabon                            | 3771 (3259 to 4323)           | 234 (204 to 265)                                            | -3.7% (-6.6% to -0.6%)                                                     | 5616 (5359 to 5908)           | 403 (386 to 424)                                                | 0.7% (-0.7% to 2.2%)                                                           |

25 Abbreviations: UI, uncertainty interval  
2627  
28  
29  
30  
31  
32  
33  
34  
35  
36  
37  
38  
39  
40  
41  
42  
43  
44  
45  
46

1

2

3

4 **Table 2. Incidence and prevalence of spinal cord injury in 2019, and percentage changes of age-standardized rates/estimates by location, 1990–2019**

|                                    | Incidence                     |                                                             |                                                                            | Prevalence                         |                                                                 |                                                                                |
|------------------------------------|-------------------------------|-------------------------------------------------------------|----------------------------------------------------------------------------|------------------------------------|-----------------------------------------------------------------|--------------------------------------------------------------------------------|
|                                    | Numbers<br>(95% UI)<br>(2019) | Age-standardized<br>rates per 100,000<br>(95% UI)<br>(2019) | Percentage change of age-<br>standardized rates<br>(95% UI)<br>(1990–2019) | Numbers<br>(95% UI)<br>(2019)      | Age-standardized<br>estimates per 100,000<br>(95% UI)<br>(2019) | Percentage change of age-<br>standardized estimates<br>(95% UI)<br>(1990–2019) |
| 5 <b>Global</b>                    | 909001 (706953<br>to 1156410) | 12 (9 to 15)                                                | -6.1% (-17.3% to 1.5%)                                                     | 20635037 (18925876<br>to 23611174) | 253 (231 to 290)                                                | 5.8% (2.7% to 9.6%)                                                            |
| 6 <b>High-income</b>               | 218207 (166751<br>to 289330)  | 14 (11 to 18)                                               | -0.8% (-4.3% to 2.4%)                                                      | 4658703 (4322688 to<br>5025979)    | 314 (293 to 339)                                                | -1.6% (-3.2% to -0.1%)                                                         |
| 7 <b>High-income North America</b> | 114001 (85370 to<br>155645)   | 23 (17 to 30)                                               | 4.6% (-0.9% to 10.5%)                                                      | 2142480 (1965695 to<br>2332658)    | 438 (404 to 474)                                                | -6.5% (-9.1% to -3.8%)                                                         |
| 8 <b>Canada</b>                    | 5431 (4270 to<br>6912)        | 10 (8 to 13)                                                | 6.2% (0.6% to 11.9%)                                                       | 104864 (98334 to<br>112454)        | 203 (191 to 218)                                                | 1.5% (-1.3% to 4.2%)                                                           |
| 9 <b>Greenland</b>                 | 19 (15 to 26)                 | 32 (24 to 43)                                               | -17.0% (-20.6% to -13.7%)                                                  | 313 (288 to 341)                   | 477 (437 to 518)                                                | -11.1% (-13.9% to -8.8%)                                                       |
| 10 <b>United States of America</b> | 108549 (80631 to<br>149208)   | 24 (18 to 32)                                               | 5.1% (-0.7% to 11.4%)                                                      | 2037268 (1865361 to<br>2222271)    | 465 (428 to 505)                                                | -6.5% (-9.2% to -3.7%)                                                         |
| 11 <b>Australasia</b>              | 4996 (3949 to<br>6243)        | 14 (11 to 17)                                               | 8.1% (3.3% to 13.2%)                                                       | 128689 (118942 to<br>142726)       | 362 (331 to 405)                                                | 6.8% (4.0% to 9.8%)                                                            |
| 12 <b>Australia</b>                | 4146 (3277 to<br>5191)        | 14 (11 to 17)                                               | 9.5% (4.1% to 15.2%)                                                       | 106452 (98260 to<br>118061)        | 354 (323 to 397)                                                | 7.0% (3.9% to 10.5%)                                                           |
| 13 <b>New Zealand</b>              | 850 (675 to 1072)             | 16 (13 to 19)                                               | 3.8% (-0.7% to 8.5%)                                                       | 22238 (20608 to<br>24554)          | 407 (374 to 452)                                                | 7.0% (3.2% to 11.4%)                                                           |
| 14 <b>High-income Asia Pacific</b> | 32690 (25123 to<br>40257)     | 12 (9 to 15)                                                | -9.8% (-13.9% to -6.4%)                                                    | 859398 (798884 to<br>919912)       | 305 (283 to 328)                                                | -3.9% (-5.7% to -1.8%)                                                         |

39

40

41

42

43

44

45

46

1  
2  
3  
4  
5  
6  
7  
8  
9  
10  
11  
12  
13  
14  
15  
16  
17  
18  
19  
20  
21  
22  
23  
24  
25  
26  
27  
28  
29  
30  
31  
32  
33  
34  
35  
36  
37  
38  
39  
40  
41  
42  
43  
44  
45  
46

|                   | Incidence                     |                                                             |                                                                            | Prevalence                      |                                                                 |                                                                                |
|-------------------|-------------------------------|-------------------------------------------------------------|----------------------------------------------------------------------------|---------------------------------|-----------------------------------------------------------------|--------------------------------------------------------------------------------|
|                   | Numbers<br>(95% UI)<br>(2019) | Age-standardized<br>rates per 100,000<br>(95% UI)<br>(2019) | Percentage change of age-<br>standardized rates<br>(95% UI)<br>(1990–2019) | Numbers<br>(95% UI)<br>(2019)   | Age-standardized<br>estimates per 100,000<br>(95% UI)<br>(2019) | Percentage change of age-<br>standardized estimates<br>(95% UI)<br>(1990–2019) |
|                   | 43125)                        |                                                             |                                                                            | 927726)                         |                                                                 |                                                                                |
| Brunei Darussalam | 32 (26 to 38)                 | 8 (6 to 9)                                                  | -8.5% (-13.8% to -3.9%)                                                    | 809 (759 to 862)                | 177 (167 to 188)                                                | -4.0% (-7.1% to -0.9%)                                                         |
| Japan             | 26116 (19727 to<br>35484)     | 13 (10 to 17)                                               | -7.7% (-11.8% to -4.3%)                                                    | 675897 (622213 to<br>733296)    | 342 (316 to 371)                                                | -1.4% (-3.5% to 0.9%)                                                          |
| Republic of Korea | 6124 (4942 to<br>7543)        | 9 (8 to 12)                                                 | -3.4% (-10.6% to 3.3%)                                                     | 168438 (158707 to<br>180809)    | 229 (216 to 247)                                                | 7.9% (4.3% to 11.9%)                                                           |
| Singapore         | 418 (340 to 504)              | 7 (6 to 8)                                                  | -7.0% (-10.6% to -3.5%)                                                    | 14255 (13304 to<br>15272)       | 195 (182 to 209)                                                | 3.6% (0.7% to 6.5%)                                                            |
| Western Europe    | 61215 (45912 to<br>80682)     | 10 (8 to 12)                                                | -5.6% (-9.8% to -2.2%)                                                     | 1374656 (1272365 to<br>1486731) | 233 (216 to 253)                                                | 1.4% (-1.4% to 4.3%)                                                           |
| Andorra           | 12 (9 to 15)                  | 11 (8 to 14)                                                | 2.9% (-0.8% to 7.0%)                                                       | 284 (265 to 307)                | 247 (230 to 268)                                                | 6.9% (3.1% to 11.5%)                                                           |
| Austria           | 1209 (922 to<br>1575)         | 10 (8 to 12)                                                | -11.0% (-15.4% to -6.6%)                                                   | 28169 (26147 to<br>30656)       | 232 (215 to 255)                                                | -3.0% (-7.6% to 1.1%)                                                          |
| Belgium           | 1992 (1500 to<br>2628)        | 12 (9 to 15)                                                | 13.8% (6.7% to 19.7%)                                                      | 41680 (38494 to<br>45149)       | 269 (248 to 294)                                                | 11.5% (6.8% to 16.8%)                                                          |
| Cyprus            | 135 (105 to 173)              | 9 (7 to 12)                                                 | 5.4% (-0.8% to 11.1%)                                                      | 3506 (3240 to 3836)             | 217 (200 to 239)                                                | 10.5% (5.0% to 16.9%)                                                          |
| Denmark           | 657 (505 to 851)              | 9 (7 to 11)                                                 | -23.5% (-27.8% to -18.8%)                                                  | 15769 (14579 to<br>17119)       | 213 (194 to 234)                                                | -0.7% (-5.4% to 4.5%)                                                          |
| Finland           | 995 (754 to 1300)             | 13 (10 to 16)                                               | -9.0% (-13.3% to -4.7%)                                                    | 23401 (21471 to<br>25629)       | 313 (285 to 349)                                                | 2.6% (-1.3% to 8.2%)                                                           |

1  
2  
3  
4  
5  
6  
7  
8  
9  
10  
11  
12  
13  
14  
15  
16  
17  
18  
19  
20  
21  
22  
23  
24  
25  
26  
27  
28  
29  
30  
31  
32  
33  
34  
35  
36  
37  
38  
39  
40  
41  
42  
43  
44  
45  
46

|             | Incidence                     |                                                             |                                                                            | Prevalence                    |                                                                 |                                                                                |
|-------------|-------------------------------|-------------------------------------------------------------|----------------------------------------------------------------------------|-------------------------------|-----------------------------------------------------------------|--------------------------------------------------------------------------------|
|             | Numbers<br>(95% UI)<br>(2019) | Age-standardized<br>rates per 100,000<br>(95% UI)<br>(2019) | Percentage change of age-<br>standardized rates<br>(95% UI)<br>(1990–2019) | Numbers<br>(95% UI)<br>(2019) | Age-standardized<br>estimates per 100,000<br>(95% UI)<br>(2019) | Percentage change of age-<br>standardized estimates<br>(95% UI)<br>(1990–2019) |
| France      | 10840 (8157 to 14346)         | 11 (9 to 14)                                                | -6.5% (-11.3% to -2.2%)                                                    | 222331 (205901 to 240071)     | 248 (229 to 268)                                                | 1.4% (-2.5% to 5.3%)                                                           |
| Germany     | 11418 (8599 to 15121)         | 9 (7 to 11)                                                 | -1.3% (-6.3% to 3.3%)                                                      | 252232 (231248 to 274013)     | 214 (196 to 234)                                                | 4.4% (-0.2% to 9.4%)                                                           |
| Greece      | 897 (711 to 1125)             | 7 (6 to 9)                                                  | -11.0% (-14.9% to -7.3%)                                                   | 27838 (25879 to 30192)        | 203 (188 to 222)                                                | -5% (-9.2% to -1.5%)                                                           |
| Iceland     | 35 (28 to 45)                 | 9 (7 to 11)                                                 | -2.0% (-6.7% to 2.2%)                                                      | 924 (853 to 1003)             | 221 (203 to 242)                                                | 3.9% (-0.3% to 8.4%)                                                           |
| Ireland     | 454 (357 to 575)              | 8 (7 to 10)                                                 | -0.8% (-6.2% to 3.9%)                                                      | 12722 (11716 to 13820)        | 218 (200 to 239)                                                | 9.5% (5.1% to 13.8%)                                                           |
| Israel      | 700 (560 to 870)              | 7 (6 to 9)                                                  | -10.8% (-28.3% to -0.1%)                                                   | 23677 (19717 to 31856)        | 247 (204 to 337)                                                | 29.8% (11.9% to 69.2%)                                                         |
| Italy       | 7114 (5225 to 9725)           | 8 (6 to 10)                                                 | -23.6% (-26.2% to -20.9%)                                                  | 167203 (155913 to 180891)     | 193 (179 to 208)                                                | -11.8% (-14.3% to -8.9%)                                                       |
| Luxembourg  | 77 (59 to 100)                | 10 (8 to 13)                                                | -7.6% (-13.0% to -2.5%)                                                    | 1867 (1742 to 2028)           | 236 (219 to 256)                                                | -1.9% (-6.2% to 2.3%)                                                          |
| Malta       | 51 (39 to 66)                 | 9 (7 to 12)                                                 | 6.3% (2.9% to 9.7%)                                                        | 1394 (1284 to 1511)           | 240 (218 to 263)                                                | 15.3% (10.9% to 20.5%)                                                         |
| Monaco      | 11 (8 to 16)                  | 20 (15 to 27)                                               | 12.2% (7.6% to 16.2%)                                                      | 257 (234 to 283)              | 488 (440 to 553)                                                | 14.0% (9.9% to 19.1%)                                                          |
| Netherlands | 2465 (1825 to 3305)           | 9 (7 to 12)                                                 | 21.1% (12.7% to 29.4%)                                                     | 45505 (42399 to 48825)        | 193 (180 to 208)                                                | 10.5% (6.1% to 14.5%)                                                          |
| Norway      | 2129 (1430 to 3202)           | 26 (18 to 37)                                               | -1.3% (-5.5% to 2.7%)                                                      | 36099 (32427 to 39596)        | 503 (454 to 557)                                                | 3.5% (0.5% to 7.0%)                                                            |

1  
2  
3  
4  
5  
6  
7  
8  
9  
10  
11  
12  
13  
14  
15  
16  
17  
18  
19  
20  
21  
22  
23  
24  
25  
26  
27  
28  
29  
30  
31  
32  
33  
34  
35  
36  
37  
38  
39  
40  
41  
42  
43  
44  
45  
46

|                                                         | Incidence                     |                                                             |                                                                            | Prevalence                    |                                                                 |                                                                                |
|---------------------------------------------------------|-------------------------------|-------------------------------------------------------------|----------------------------------------------------------------------------|-------------------------------|-----------------------------------------------------------------|--------------------------------------------------------------------------------|
|                                                         | Numbers<br>(95% UI)<br>(2019) | Age-standardized<br>rates per 100,000<br>(95% UI)<br>(2019) | Percentage change of age-<br>standardized rates<br>(95% UI)<br>(1990–2019) | Numbers<br>(95% UI)<br>(2019) | Age-standardized<br>estimates per 100,000<br>(95% UI)<br>(2019) | Percentage change of age-<br>standardized estimates<br>(95% UI)<br>(1990–2019) |
| Portugal                                                | 912 (716 to 1160)             | 6 (5 to 7)                                                  | -21.9% (-28.0% to -16.8%)                                                  | 23534 (21821 to 26017)        | 156 (144 to 172)                                                | -24.8% (-30.4% to -20.7%)                                                      |
| San Marino                                              | 9 (6 to 12)                   | 20 (15 to 27)                                               | 9.3% (3.5% to 14.4%)                                                       | 218 (198 to 241)              | 505 (457 to 568)                                                | 11.3% (7.1% to 15.8%)                                                          |
| Spain                                                   | 4547 (3526 to 5853)           | 8 (6 to 10)                                                 | -0.9% (-10.0% to 7.6%)                                                     | 129596 (120047 to 140357)     | 208 (192 to 228)                                                | 5.7% (-0.3% to 11.6%)                                                          |
| Sweden                                                  | 3946 (2665 to 5921)           | 24 (17 to 34)                                               | 1.8% (-3.0% to 6.6%)                                                       | 72301 (65044 to 79382)        | 515 (464 to 573)                                                | 5.3% (2.1% to 8.9%)                                                            |
| Switzerland                                             | 1460 (1091 to 1923)           | 12 (9 to 15)                                                | -18.5% (-21.9% to -14.8%)                                                  | 32541 (29900 to 35495)        | 272 (248 to 300)                                                | -9.3% (-13.3% to -4.0%)                                                        |
| United Kingdom                                          | 9096 (6830 to 12284)          | 10 (8 to 13)                                                | 6.0% (0.4% to 10.6%)                                                       | 210409 (194954 to 228369)     | 243 (225 to 265)                                                | 5.1% (2.2% to 8.0%)                                                            |
| <b>Southern Latin America</b>                           | 5305 (4326 to 6394)           | 8 (6 to 9)                                                  | 1.7% (-2.6% to 5.2%)                                                       | 153480 (143685 to 165038)     | 209 (195 to 225)                                                | 7.7% (0.5% to 12.3%)                                                           |
| Argentina                                               | 3384 (2755 to 4077)           | 7 (6 to 9)                                                  | -1.7% (-7.2% to 2.8%)                                                      | 99369 (92357 to 107852)       | 205 (190 to 223)                                                | 3.8% (-5.3% to 9.4%)                                                           |
| Chile                                                   | 1599 (1294 to 1955)           | 8 (7 to 10)                                                 | 9.3% (4.8% to 13.5%)                                                       | 45271 (42649 to 48478)        | 215 (202 to 231)                                                | 18.2% (14.5% to 22.3%)                                                         |
| Uruguay                                                 | 322 (260 to 391)              | 9 (7 to 10)                                                 | 0.1% (-6.8% to 6.4%)                                                       | 8832 (8331 to 9435)           | 223 (210 to 239)                                                | 5.5% (1.9% to 9.1%)                                                            |
| <b>Central Europe, Eastern Europe, and Central Asia</b> | 53570 (42822 to 66828)        | 12 (10 to 15)                                               | -16.9% (-19.6% to -14.4%)                                                  | 1470355 (1367128 to 1601720)  | 291 (270 to 317)                                                | -10.5% (-13.3% to -5.1%)                                                       |



1  
2  
3  
4  
5  
6  
7  
8  
9  
10  
11  
12  
13  
14  
15  
16  
17  
18  
19  
20  
21  
22  
23  
24  
25  
26  
27  
28  
29  
30  
31  
32  
33  
34  
35  
36  
37  
38  
39  
40  
41  
42  
43  
44  
45  
46

|                        | Incidence                     |                                                             |                                                                            | Prevalence                    |                                                                 |                                                                                |
|------------------------|-------------------------------|-------------------------------------------------------------|----------------------------------------------------------------------------|-------------------------------|-----------------------------------------------------------------|--------------------------------------------------------------------------------|
|                        | Numbers<br>(95% UI)<br>(2019) | Age-standardized<br>rates per 100,000<br>(95% UI)<br>(2019) | Percentage change of age-<br>standardized rates<br>(95% UI)<br>(1990–2019) | Numbers<br>(95% UI)<br>(2019) | Age-standardized<br>estimates per 100,000<br>(95% UI)<br>(2019) | Percentage change of age-<br>standardized estimates<br>(95% UI)<br>(1990–2019) |
| <b>Eastern Europe</b>  | 30092 (23743 to 37989)        | 13 (11 to 16)                                               | -15.7% (-18.3% to -12.9%)                                                  | 805575 (746346 to 876551)     | 305 (282 to 333)                                                | -13.9% (-16.5% to -9.0%)                                                       |
| Belarus                | 1362 (1099 to 1674)           | 13 (10 to 16)                                               | -3.7% (-10.5% to 3.3%)                                                     | 35199 (33016 to 38065)        | 290 (272 to 313)                                                | -6.1% (-8.7% to -3.2%)                                                         |
| Estonia                | 160 (128 to 195)              | 11 (9 to 13)                                                | -34.4% (-39.2% to -30.1%)                                                  | 4627 (4341 to 4987)           | 273 (255 to 293)                                                | -23.9% (-27.0% to -20.9%)                                                      |
| Latvia                 | 259 (209 to 320)              | 12 (10 to 14)                                               | -36.6% (-40.2% to -32.9%)                                                  | 6847 (6438 to 7434)           | 273 (256 to 295)                                                | -28.6% (-31.3% to -25.9%)                                                      |
| Lithuania              | 448 (358 to 555)              | 13 (11 to 16)                                               | -22.0% (-27.2% to -17.0%)                                                  | 11184 (10535 to 12051)        | 297 (279 to 321)                                                | -17.8% (-20.3% to -14.8%)                                                      |
| Republic of Moldova    | 381 (309 to 462)              | 10 (8 to 12)                                                | -23.9% (-28.2% to -19.5%)                                                  | 11018 (10315 to 11881)        | 239 (223 to 257)                                                | -14.5% (-17.6% to -11.2%)                                                      |
| Russian Federation     | 21366 (16720 to 27153)        | 13 (11 to 17)                                               | -16.2% (-19.6% to -12.6%)                                                  | 575291 (532592 to 628058)     | 313 (289 to 343)                                                | -13.4% (-16.5% to -8.1%)                                                       |
| Ukraine                | 6116 (4927 to 7659)           | 13 (11 to 16)                                               | -13.3% (-16.4% to -9.3%)                                                   | 161409 (149366 to 177092)     | 292 (269 to 321)                                                | -15.6% (-18.7% to -10.7%)                                                      |
| <b>Central Europe</b>  | 17227 (13648 to 21504)        | 13 (11 to 16)                                               | -13.0% (-16.2% to -9.8%)                                                   | 489513 (456513 to 533815)     | 332 (308 to 363)                                                | 1.8% (-1.4% to 6.8%)                                                           |
| Albania                | 307 (246 to 378)              | 11 (9 to 14)                                                | 0.5% (-7.6% to 9.0%)                                                       | 10877 (9969 to 12120)         | 332 (303 to 375)                                                | 8.7% (2.5% to 20.1%)                                                           |
| Bosnia and Herzegovina | 395 (315 to 483)              | 11 (9 to 14)                                                | -24.7% (-52.9% to -2.0%)                                                   | 20410 (14633 to 35167)        | 491 (349 to 860)                                                | 62.4% (25.7% to 136.1%)                                                        |

1  
2  
3  
4  
5  
6  
7  
8  
9  
10  
11  
12  
13  
14  
15  
16  
17  
18  
19  
20  
21  
22  
23  
24  
25  
26  
27  
28  
29  
30  
31  
32  
33  
34  
35  
36  
37  
38  
39  
40  
41  
42  
43  
44  
45  
46

|                 | Incidence                     |                                                             |                                                                            | Prevalence                    |                                                                 |                                                                                |
|-----------------|-------------------------------|-------------------------------------------------------------|----------------------------------------------------------------------------|-------------------------------|-----------------------------------------------------------------|--------------------------------------------------------------------------------|
|                 | Numbers<br>(95% UI)<br>(2019) | Age-standardized<br>rates per 100,000<br>(95% UI)<br>(2019) | Percentage change of age-<br>standardized rates<br>(95% UI)<br>(1990–2019) | Numbers<br>(95% UI)<br>(2019) | Age-standardized<br>estimates per 100,000<br>(95% UI)<br>(2019) | Percentage change of age-<br>standardized estimates<br>(95% UI)<br>(1990–2019) |
| Bulgaria        | 858 (692 to 1043)             | 12 (10 to 14)                                               | -9% (-13.4% to -5.1%)                                                      | 26946 (25037 to 29240)        | 308 (284 to 334)                                                | -5.3% (-8.7% to -2.7%)                                                         |
| Croatia         | 952 (726 to 1242)             | 16 (13 to 20)                                               | 0.3% (-7.2% to 8.0%)                                                       | 21217 (19643 to 23395)        | 369 (339 to 408)                                                | 5.6% (0.1% to 14.4%)                                                           |
| Czechia         | 1845 (1461 to 2299)           | 14 (12 to 18)                                               | -22.2% (-26.2% to -18.3%)                                                  | 51155 (47808 to 55398)        | 366 (340 to 397)                                                | 1.0% (-2.5% to 5.0%)                                                           |
| Hungary         | 1657 (1300 to 2100)           | 14 (11 to 17)                                               | -28.0% (-31.8% to -24.1%)                                                  | 40177 (37422 to 43691)        | 316 (293 to 343)                                                | -5.0% (-8.6% to -0.2%)                                                         |
| Montenegro      | 86 (69 to 105)                | 13 (10 to 15)                                               | 0.6% (-2.2% to 3.3%)                                                       | 2449 (2288 to 2656)           | 324 (302 to 352)                                                | 3.5% (0.4% to 6.9%)                                                            |
| North Macedonia | 247 (197 to 301)              | 11 (9 to 13)                                                | 13.6% (6.3% to 21.3%)                                                      | 7655 (7103 to 8316)           | 289 (267 to 314)                                                | 12.2% (8.3% to 16.7%)                                                          |
| Poland          | 5981 (4676 to 7524)           | 13 (11 to 17)                                               | -8.3% (-12.4% to -4.2%)                                                    | 163770 (153262 to 177622)     | 327 (305 to 354)                                                | 1.5% (-1.1% to 4.0%)                                                           |
| Romania         | 2425 (1962 to 2953)           | 12 (9 to 14)                                                | -15.6% (-19.5% to -11.5%)                                                  | 72662 (67894 to 78563)        | 297 (276 to 323)                                                | -9.3% (-12.4% to -6.2%)                                                        |
| Serbia          | 1082 (873 to 1327)            | 11 (9 to 14)                                                | 0.7% (-6.3% to 7.6%)                                                       | 36205 (31742 to 45108)        | 341 (296 to 435)                                                | 19.0% (5.7% to 49.8%)                                                          |
| Slovakia        | 928 (735 to 1145)             | 15 (12 to 18)                                               | -7.5% (-11.9% to -3.5%)                                                    | 24557 (22989 to 26578)        | 349 (326 to 379)                                                | 4.9% (1.9% to 8.4%)                                                            |
| Slovenia        | 466 (364 to 597)              | 17 (13 to 20)                                               | -14.2% (-20.0% to -9.1%)                                                   | 11433 (10655 to 12393)        | 401 (373 to 435)                                                | -2.9% (-6.6% to 0.8%)                                                          |

1  
2  
3  
4  
5  
6  
7  
8  
9  
10  
11  
12  
13  
14  
15  
16  
17  
18  
19  
20  
21  
22  
23  
24  
25  
26  
27  
28  
29  
30  
31  
32  
33  
34  
35  
36  
37  
38  
39  
40  
41  
42  
43  
44  
45  
46

|                                    | Incidence                     |                                                             |                                                                            | Prevalence                    |                                                                 |                                                                                |
|------------------------------------|-------------------------------|-------------------------------------------------------------|----------------------------------------------------------------------------|-------------------------------|-----------------------------------------------------------------|--------------------------------------------------------------------------------|
|                                    | Numbers<br>(95% UI)<br>(2019) | Age-standardized<br>rates per 100,000<br>(95% UI)<br>(2019) | Percentage change of age-<br>standardized rates<br>(95% UI)<br>(1990–2019) | Numbers<br>(95% UI)<br>(2019) | Age-standardized<br>estimates per 100,000<br>(95% UI)<br>(2019) | Percentage change of age-<br>standardized estimates<br>(95% UI)<br>(1990–2019) |
| <b>Central Asia</b>                | 6252 (5146 to 7468)           | 7 (6 to 8)                                                  | -6.8% (-9.5% to -4.3%)                                                     | 175268 (159927 to 201702)     | 186 (170 to 212)                                                | -2.7% (-9.8% to 10.6%)                                                         |
| Armenia                            | 192 (159 to 231)              | 6 (5 to 7)                                                  | -28.8% (-34.4% to -24.1%)                                                  | 9408 (7488 to 12854)          | 264 (212 to 358)                                                | -45.3% (-53.4% to -34.9%)                                                      |
| Azerbaijan                         | 590 (485 to 708)              | 6 (5 to 7)                                                  | -10.8% (-17.5% to -5.3%)                                                   | 19475 (17317 to 23953)        | 169 (151 to 205)                                                | 8.1% (-1.5% to 30.6%)                                                          |
| Georgia                            | 343 (280 to 418)              | 9 (7 to 11)                                                 | 9.9% (4.9% to 15.0%)                                                       | 10030 (9083 to 11840)         | 236 (211 to 282)                                                | 18.5% (8.9% to 40.7%)                                                          |
| Kazakhstan                         | 1558 (1281 to 1873)           | 8 (7 to 10)                                                 | -0.3% (-4.1% to 3.5%)                                                      | 39097 (36469 to 42064)        | 203 (190 to 218)                                                | 1.0% (-1.4% to 3.2%)                                                           |
| Kyrgyzstan                         | 391 (322 to 474)              | 6 (5 to 7)                                                  | -20.7% (-24.8% to -16.4%)                                                  | 10187 (9455 to 11006)         | 165 (154 to 178)                                                | -7.7% (-11% to -2.5%)                                                          |
| Mongolia                           | 275 (226 to 330)              | 8 (7 to 10)                                                 | 10.8% (3.7% to 16.7%)                                                      | 6391 (5970 to 6861)           | 184 (172 to 198)                                                | 22.3% (18.4% to 26.1%)                                                         |
| Tajikistan                         | 498 (414 to 595)              | 5 (4 to 6)                                                  | -23.1% (-27.8% to -19.1%)                                                  | 20651 (13792 to 38620)        | 237 (160 to 436)                                                | 43.8% (-1.4% to 165.1%)                                                        |
| Turkmenistan                       | 285 (237 to 341)              | 6 (5 to 7)                                                  | -2.4% (-8.0% to 3.2%)                                                      | 7701 (7145 to 8470)           | 152 (141 to 167)                                                | 5.7% (0.9% to 13.5%)                                                           |
| Uzbekistan                         | 2119 (1744 to 2552)           | 6 (5 to 8)                                                  | 3.0% (-1.0% to 7.0%)                                                       | 52328 (48703 to 55999)        | 158 (147 to 168)                                                | 0.5% (-2.7% to 3.7%)                                                           |
| <b>Latin America and Caribbean</b> | 64555 (50629 to 82893)        | 11 (9 to 14)                                                | -15.4% (-24.7% to -10.6%)                                                  | 1654334 (1525342 to 1823896)  | 271 (250 to 299)                                                | -5.8% (-11.6% to -1.4%)                                                        |
| <b>Central Latin America</b>       | 24749 (19700 to 30000)        | 10 (8 to 13)                                                | -23.4% (-34.3% to -17.9%)                                                  | 656424 (594640 to 718208)     | 259 (235 to 300)                                                | -16.8% (-24.4% to -12%)                                                        |

1  
2  
3  
4  
5  
6  
7  
8  
9  
10  
11  
12  
13  
14  
15  
16  
17  
18  
19  
20  
21  
22  
23  
24  
25  
26  
27  
28  
29  
30  
31  
32  
33  
34  
35  
36  
37  
38  
39  
40  
41  
42  
43  
44  
45  
46

|                                       | Incidence                     |                                                             |                                                                            | Prevalence                    |                                                                 |                                                                                |
|---------------------------------------|-------------------------------|-------------------------------------------------------------|----------------------------------------------------------------------------|-------------------------------|-----------------------------------------------------------------|--------------------------------------------------------------------------------|
|                                       | Numbers<br>(95% UI)<br>(2019) | Age-standardized<br>rates per 100,000<br>(95% UI)<br>(2019) | Percentage change of age-<br>standardized rates<br>(95% UI)<br>(1990–2019) | Numbers<br>(95% UI)<br>(2019) | Age-standardized<br>estimates per 100,000<br>(95% UI)<br>(2019) | Percentage change of age-<br>standardized estimates<br>(95% UI)<br>(1990–2019) |
|                                       | 30982)                        |                                                             |                                                                            | 761640)                       |                                                                 |                                                                                |
| Colombia                              | 2768 (2213 to<br>3431)        | 6 (5 to 7)                                                  | -40.6% (-58.5% to -27.4%)                                                  | 100259 (86297 to<br>132383)   | 196 (169 to 259)                                                | -10.5% (-18.7% to 3.4%)                                                        |
| Costa Rica                            | 303 (246 to 371)              | 6 (5 to 8)                                                  | -0.6% (-4.1% to 3.8%)                                                      | 8130 (7657 to 8739)           | 160 (151 to 172)                                                | 7.5% (4.5% to 10.5%)                                                           |
| El Salvador                           | 413 (332 to 515)              | 7 (5 to 8)                                                  | -61.9% (-83.5% to -24.9%)                                                  | 20241 (11797 to<br>42493)     | 337 (193 to 718)                                                | -49.8% (-59.1% to -26%)                                                        |
| Guatemala                             | 1011 (825 to<br>1215)         | 6 (5 to 7)                                                  | -44.3% (-72.1% to -10.8%)                                                  | 29872 (22956 to<br>46810)     | 198 (149 to 318)                                                | -35.6% (-53.6% to -4.6%)                                                       |
| Honduras                              | 511 (407 to 632)              | 5 (4 to 7)                                                  | 7.2% (1.0% to 14.3%)                                                       | 14252 (12544 to<br>16931)     | 165 (146 to 198)                                                | 32.3% (18.9% to 56.1%)                                                         |
| Mexico                                | 17497 (13364 to<br>22764)     | 14 (11 to 19)                                               | -16.1% (-17.6% to -14.6%)                                                  | 404685 (374488 to<br>442322)  | 319 (295 to 348)                                                | -12.7% (-14.5% to -11.1%)                                                      |
| Nicaragua                             | 292 (240 to 353)              | 5 (4 to 6)                                                  | -14.0% (-33.4% to -1.3%)                                                   | 19884 (9920 to<br>43869)      | 342 (167 to 760)                                                | -48.7% (-56.3% to -26.6%)                                                      |
| Panama                                | 218 (176 to 265)              | 5 (4 to 6)                                                  | -5.9% (-10.3% to -0.9%)                                                    | 6453 (5833 to 7965)           | 154 (139 to 190)                                                | -4.3% (-21.7% to 4.6%)                                                         |
| Venezuela (Bolivarian Republic<br>of) | 1736 (1400 to<br>2127)        | 6 (5 to 8)                                                  | -6.7% (-13.0% to -0.5%)                                                    | 52649 (47953 to<br>58203)     | 177 (161 to 196)                                                | 9.1% (2.4% to 19.3%)                                                           |
| <b>Andean Latin America</b>           | 2871 (2381 to<br>3389)        | 5 (4 to 5)                                                  | -39.5% (-66.5% to -11.2%)                                                  | 84038 (74358 to<br>105119)    | 136 (120 to 169)                                                | -1.2% (-13.2% to 7.9%)                                                         |
| Bolivia (Plurinational State of)      | 487 (405 to 572)              | 4 (4 to 5)                                                  | 2.5% (-3.2% to 7.9%)                                                       | 11226 (10592 to               | 103 (97 to 109)                                                 | 10.4% (6.8% to 14.2%)                                                          |

1  
2  
3  
4  
5  
6  
7  
8  
9  
10  
11  
12  
13  
14  
15  
16  
17  
18  
19  
20  
21  
22  
23  
24  
25  
26  
27  
28  
29  
30  
31  
32  
33  
34  
35  
36  
37  
38  
39  
40  
41  
42  
43  
44  
45  
46

|                     | Incidence                     |                                                             |                                                                            | Prevalence                    |                                                                 |                                                                                |
|---------------------|-------------------------------|-------------------------------------------------------------|----------------------------------------------------------------------------|-------------------------------|-----------------------------------------------------------------|--------------------------------------------------------------------------------|
|                     | Numbers<br>(95% UI)<br>(2019) | Age-standardized<br>rates per 100,000<br>(95% UI)<br>(2019) | Percentage change of age-<br>standardized rates<br>(95% UI)<br>(1990–2019) | Numbers<br>(95% UI)<br>(2019) | Age-standardized<br>estimates per 100,000<br>(95% UI)<br>(2019) | Percentage change of age-<br>standardized estimates<br>(95% UI)<br>(1990–2019) |
|                     |                               |                                                             |                                                                            | 11990)                        |                                                                 |                                                                                |
| Ecuador             | 912 (763 to 1078)             | 5 (4 to 6)                                                  | 14.7% (9.9% to 19.4%)                                                      | 23004 (21613 to 24784)        | 136 (127 to 146)                                                | 5.4% (-1.9% to 11.3%)                                                          |
| Peru                | 1473 (1223 to 1748)           | 4 (4 to 5)                                                  | -56.3% (-78.9% to -23.7%)                                                  | 49807 (41420 to 70628)        | 146 (121 to 205)                                                | -5.4% (-19.7% to 7.5%)                                                         |
| <b>Caribbean</b>    | 3459 (2814 to 4227)           | 7 (6 to 9)                                                  | 8.2% (0.9% to 15.1%)                                                       | 118136 (93316 to 165454)      | 239 (188 to 336)                                                | 64.8% (29.1% to 131.2%)                                                        |
| Antigua and Barbuda | 4 (3 to 5)                    | 5 (4 to 6)                                                  | 11.7% (6.5% to 17.3%)                                                      | 133 (124 to 142)              | 131 (123 to 140)                                                | 16.2% (13.2% to 19.6%)                                                         |
| Bahamas             | 19 (16 to 23)                 | 5 (4 to 6)                                                  | 8.1% (0.9% to 14.5%)                                                       | 513 (487 to 543)              | 123 (117 to 130)                                                | 14.8% (10.7% to 18.7%)                                                         |
| Barbados            | 14 (12 to 17)                 | 4 (4 to 5)                                                  | 9.5% (3.6% to 15.6%)                                                       | 426 (403 to 451)              | 117 (111 to 124)                                                | 12.0% (8.4% to 15.3%)                                                          |
| Belize              | 21 (17 to 26)                 | 5 (4 to 7)                                                  | -9.5% (-41.1% to 13.8%)                                                    | 525 (488 to 578)              | 138 (128 to 152)                                                | 16.5% (12.4% to 21.5%)                                                         |
| Bermuda             | 9 (7 to 12)                   | 12 (9 to 15)                                                | 9.3% (-1.2% to 20.5%)                                                      | 259 (242 to 278)              | 297 (277 to 319)                                                | 19.7% (15.2% to 24.9%)                                                         |
| Cuba                | 1263 (985 to 1628)            | 8 (7 to 10)                                                 | 17.7% (6.3% to 28.6%)                                                      | 23861 (22638 to 25300)        | 162 (153 to 171)                                                | 8.3% (3.6% to 12.4%)                                                           |
| Dominica            | 3 (3 to 4)                    | 4 (4 to 5)                                                  | 7.9% (3.3% to 12.2%)                                                       | 101 (91 to 117)               | 131 (119 to 150)                                                | 22.5% (9.8% to 39.5%)                                                          |
| Dominican Republic  | 587 (460 to 736)              | 5 (4 to 7)                                                  | 31.8% (26.4% to 37.7%)                                                     | 14734 (13824 to 15659)        | 138 (130 to 146)                                                | 28.4% (24.5% to 32.9%)                                                         |
| Grenada             | 5 (4 to 6)                    | 5 (4 to 6)                                                  | 21.7% (14.2% to 28.6%)                                                     | 149 (137 to 171)              | 133 (122 to 153)                                                | -2.1% (-29.9% to 20.1%)                                                        |
| Guyana              | 46 (39 to 55)                 | 6 (5 to 8)                                                  | 14.9% (11.5% to 18.4%)                                                     | 973 (916 to 1048)             | 127 (120 to 137)                                                | 18.5% (14.7% to 21.7%)                                                         |
| Haiti               | 505 (409 to 612)              | 4 (4 to 5)                                                  | -0.2% (-5.4% to 3.8%)                                                      | 49888 (26327 to               | 431 (230 to 813)                                                | 391% (164.9% to 805.4%)                                                        |

1  
2  
3  
4  
5  
6  
7  
8  
9  
10  
11  
12  
13  
14  
15  
16  
17  
18  
19  
20  
21  
22  
23  
24  
25  
26  
27  
28  
29  
30  
31  
32  
33  
34  
35  
36  
37  
38  
39  
40  
41  
42  
43  
44  
45  
46

|                                                   | Incidence                     |                                                             |                                                                            | Prevalence                      |                                                                 |                                                                                |
|---------------------------------------------------|-------------------------------|-------------------------------------------------------------|----------------------------------------------------------------------------|---------------------------------|-----------------------------------------------------------------|--------------------------------------------------------------------------------|
|                                                   | Numbers<br>(95% UI)<br>(2019) | Age-standardized<br>rates per 100,000<br>(95% UI)<br>(2019) | Percentage change of age-<br>standardized rates<br>(95% UI)<br>(1990–2019) | Numbers<br>(95% UI)<br>(2019)   | Age-standardized<br>estimates per 100,000<br>(95% UI)<br>(2019) | Percentage change of age-<br>standardized estimates<br>(95% UI)<br>(1990–2019) |
|                                                   |                               |                                                             |                                                                            | 93675)                          |                                                                 |                                                                                |
| Jamaica                                           | 124 (101 to 150)              | 4 (4 to 5)                                                  | -5.2% (-22.3% to 5%)                                                       | 3502 (3305 to 3721)             | 117 (111 to 125)                                                | 1.1% (-1.7% to 3.9%)                                                           |
| Puerto Rico                                       | 613 (459 to 804)              | 13 (10 to 17)                                               | 6.0% (-3.1% to 15.8%)                                                      | 15476 (14251 to<br>17427)       | 330 (303 to 374)                                                | 12.6% (5.7% to 25.2%)                                                          |
| Saint Kitts and Nevis                             | 7 (5 to 9)                    | 12 (9 to 15)                                                | 6.8% (0.1% to 13.2%)                                                       | 174 (163 to 186)                | 257 (241 to 276)                                                | 21.1% (17.0% to 25.0%)                                                         |
| Saint Lucia                                       | 9 (7 to 11)                   | 5 (4 to 6)                                                  | 0.9% (-13.6% to 10.4%)                                                     | 255 (240 to 270)                | 126 (119 to 134)                                                | 17.7% (13.2% to 21.8%)                                                         |
| Saint Vincent and the Grenadines                  | 6 (5 to 7)                    | 5 (4 to 6)                                                  | 13.7% (8.2% to 19.2%)                                                      | 147 (139 to 156)                | 117 (111 to 125)                                                | 14.9% (10.4% to 19.9%)                                                         |
| Suriname                                          | 28 (23 to 35)                 | 5 (4 to 6)                                                  | 13.3% (7.7% to 18.5%)                                                      | 759 (696 to 904)                | 125 (115 to 147)                                                | -1.0% (-23.1% to 10.7%)                                                        |
| Trinidad and Tobago                               | 64 (53 to 79)                 | 5 (4 to 6)                                                  | -19.9% (-45% to -1.2%)                                                     | 1950 (1844 to 2084)             | 121 (114 to 129)                                                | 17.3% (13.6% to 20.4%)                                                         |
| United States Virgin Islands                      | 13 (10 to 17)                 | 11 (9 to 14)                                                | 4.3% (-3.6% to 12.3%)                                                      | 310 (294 to 330)                | 241 (229 to 256)                                                | -3.4% (-6.9% to 0.2%)                                                          |
| <b>Tropical Latin America</b>                     | 33477 (25278 to<br>44097)     | 14 (11 to 19)                                               | -8.1% (-11.5% to -5.1%)                                                    | 795736 (733802 to<br>868808)    | 325 (299 to 355)                                                | -2.5% (-5.4% to 0.3%)                                                          |
| Brazil                                            | 33118 (24962 to<br>43693)     | 15 (11 to 19)                                               | -8.1% (-11.5% to -5.0%)                                                    | 786832 (725507 to<br>859364)    | 330 (304 to 360)                                                | -2.4% (-5.3% to 0.5%)                                                          |
| Paraguay                                          | 359 (293 to 439)              | 5 (4 to 6)                                                  | 6.0% (2.4% to 9.7%)                                                        | 8904 (8300 to 9587)             | 133 (125 to 143)                                                | 0.2% (-3.4% to 3.3%)                                                           |
| <b>Southeast Asia, East Asia, and<br/>Oceania</b> | 284283 (211337<br>to 376241)  | 12 (9 to 16)                                                | 25.6% (17.1% to 32.6%)                                                     | 6408788 (5994232 to<br>6934620) | 245 (229 to 265)                                                | 29.5% (24.5% to 33.7%)                                                         |
| <b>East Asia</b>                                  | 236241 (173443<br>to 315144)  | 13 (10 to 18)                                               | 39.8% (32.0% to 48.0%)                                                     | 5147994 (4799710 to<br>5551476) | 266 (249 to 287)                                                | 38.0% (34.1% to 42.4%)                                                         |
| China                                             | 234191 (171837<br>to 315144)  | 14 (10 to 19)                                               | 40.8% (32.9% to 49.1%)                                                     | 5096258 (4750056 to<br>5551476) | 273 (255 to 294)                                                | 38.7% (34.7% to 43.2%)                                                         |

1

2

|                                          | Incidence                     |                                                             |                                                                            | Prevalence                      |                                                                 |                                                                                |
|------------------------------------------|-------------------------------|-------------------------------------------------------------|----------------------------------------------------------------------------|---------------------------------|-----------------------------------------------------------------|--------------------------------------------------------------------------------|
|                                          | Numbers<br>(95% UI)<br>(2019) | Age-standardized<br>rates per 100,000<br>(95% UI)<br>(2019) | Percentage change of age-<br>standardized rates<br>(95% UI)<br>(1990–2019) | Numbers<br>(95% UI)<br>(2019)   | Age-standardized<br>estimates per 100,000<br>(95% UI)<br>(2019) | Percentage change of age-<br>standardized estimates<br>(95% UI)<br>(1990–2019) |
|                                          | to 312871)                    |                                                             |                                                                            | 5499035)                        |                                                                 |                                                                                |
| Democratic People's Republic of<br>Korea | 873 (686 to 1129)             | 3 (2 to 4)                                                  | -9.4% (-16.1% to -1.5%)                                                    | 21809 (20610 to<br>23210)       | 70 (66 to 74)                                                   | -3.5% (-7.1% to 0.8%)                                                          |
| Taiwan (Province of China)               | 1177 (934 to<br>1463)         | 4 (3 to 5)                                                  | -23.6% (-27.2% to -19.7%)                                                  | 29927 (28119 to<br>32019)       | 91 (86 to 97)                                                   | -14.3% (-18.4% to -10.0%)                                                      |
| <b>Southeast Asia</b>                    | 47473 (37736 to<br>59770)     | 7 (6 to 9)                                                  | -18.7% (-31.8% to -10.7%)                                                  | 1249313 (1128418 to<br>1450442) | 179 (162 to 206)                                                | 1.3% (-10.7% to 9.4%)                                                          |
| Cambodia                                 | 797 (647 to 973)              | 5 (4 to 7)                                                  | -12.1% (-45.5% to 16.5%)                                                   | 27229 (17353 to<br>57818)       | 179 (114 to 386)                                                | -42.4% (-62.6% to 8.8%)                                                        |
| Indonesia                                | 25244 (19349 to<br>32889)     | 11 (8 to 14)                                                | -11.5% (-13.7% to -9.4%)                                                   | 624426 (577523 to<br>681498)    | 236 (218 to 257)                                                | -3.4% (-9.0% to 1.7%)                                                          |
| Lao People's Democratic<br>Republic      | 279 (221 to 352)              | 4 (3 to 5)                                                  | -44.8% (-72.5% to -14.3%)                                                  | 6076 (5689 to 6527)             | 95 (89 to 101)                                                  | 11.3% (8.3% to 14.3%)                                                          |
| Malaysia                                 | 1647 (1281 to<br>2113)        | 5 (4 to 7)                                                  | 11.3% (6.6% to 16.4%)                                                      | 38532 (36236 to<br>41114)       | 122 (114 to 130)                                                | 13.1% (10.3% to 15.8%)                                                         |
| Maldives                                 | 19 (16 to 23)                 | 4 (3 to 5)                                                  | 9.2% (0.5% to 17.6%)                                                       | 566 (518 to 639)                | 113 (104 to 126)                                                | 39.2% (30.0% to 55.1%)                                                         |
| Mauritius                                | 140 (107 to 183)              | 10 (8 to 13)                                                | 22.6% (13.8% to 32.3%)                                                     | 3734 (3493 to 4032)             | 240 (224 to 258)                                                | 27.7% (22.6% to 33.7%)                                                         |
| Myanmar                                  | 2798 (2239 to<br>3572)        | 5 (4 to 7)                                                  | -3.9% (-10.6% to 3.2%)                                                     | 95561 (72067 to<br>134781)      | 174 (132 to 244)                                                | 40.0% (-11.8% to 104.1%)                                                       |
| Philippines                              | 4962 (3991 to                 | 5 (4 to 6)                                                  | -38.3% (-54.2% to -22.5%)                                                  | 127472 (109169 to               | 125 (107 to 162)                                                | -8.8% (-24% to 1.4%)                                                           |

40

41

42

43

44

45

46

1  
2  
3  
4  
5  
6  
7  
8  
9  
10  
11  
12  
13  
14  
15  
16  
17  
18  
19  
20  
21  
22  
23  
24  
25  
26  
27  
28  
29  
30  
31  
32  
33  
34  
35  
36  
37  
38  
39  
40  
41  
42  
43  
44  
45  
46

|                                  | Incidence                     |                                                             |                                                                            | Prevalence                    |                                                                 |                                                                                |
|----------------------------------|-------------------------------|-------------------------------------------------------------|----------------------------------------------------------------------------|-------------------------------|-----------------------------------------------------------------|--------------------------------------------------------------------------------|
|                                  | Numbers<br>(95% UI)<br>(2019) | Age-standardized<br>rates per 100,000<br>(95% UI)<br>(2019) | Percentage change of age-<br>standardized rates<br>(95% UI)<br>(1990–2019) | Numbers<br>(95% UI)<br>(2019) | Age-standardized<br>estimates per 100,000<br>(95% UI)<br>(2019) | Percentage change of age-<br>standardized estimates<br>(95% UI)<br>(1990–2019) |
|                                  | 6137)                         |                                                             |                                                                            | 165496)                       |                                                                 |                                                                                |
| Seychelles                       | 11 (8 to 14)                  | 10 (8 to 13)                                                | 9.7% (5.2% to 14.2%)                                                       | 267 (250 to 287)              | 230 (215 to 246)                                                | 16.5% (12.4% to 20.4%)                                                         |
| Sri Lanka                        | 1496 (1195 to 1878)           | 7 (5 to 8)                                                  | -72.1% (-86.6% to -38.7%)                                                  | 72326 (44291 to 142831)       | 304 (184 to 605)                                                | 72.2% (36.7% to 119%)                                                          |
| Thailand                         | 4088 (3294 to 5010)           | 5 (4 to 6)                                                  | -10.5% (-17.0% to -3.9%)                                                   | 112221 (105208 to 121967)     | 125 (117 to 137)                                                | -4.6% (-8.2% to 0.0%)                                                          |
| Timor-Leste                      | 46 (37 to 57)                 | 4 (3 to 5)                                                  | -77.2% (-91.1% to -42.1%)                                                  | 3636 (1543 to 9215)           | 355 (150 to 902)                                                | -4.7% (-10.6% to 3.9%)                                                         |
| Viet Nam                         | 5883 (4660 to 7367)           | 6 (5 to 8)                                                  | 26.2% (19.4% to 33.8%)                                                     | 135628 (127816 to 144368)     | 129 (122 to 138)                                                | 29.0% (25.6% to 32.8%)                                                         |
| <b>Oceania</b>                   | 569 (466 to 697)              | 5 (4 to 6)                                                  | 10.3% (-2.6% to 19.0%)                                                     | 11481 (10493 to 12939)        | 104 (95 to 117)                                                 | 26.0% (19.6% to 36.0%)                                                         |
| American Samoa                   | 5 (4 to 6)                    | 10 (8 to 13)                                                | 6.4% (-0.1% to 13.1%)                                                      | 119 (108 to 134)              | 224 (204 to 252)                                                | 16.1% (8.1% to 29.6%)                                                          |
| Cook Islands                     | 2 (2 to 3)                    | 11 (8 to 14)                                                | -11.7% (-27.9% to 3.0%)                                                    | 52 (48 to 57)                 | 252 (232 to 276)                                                | 11.4% (6.8% to 16.4%)                                                          |
| Fiji                             | 31 (26 to 38)                 | 4 (3 to 4)                                                  | 7.3% (2.6% to 11.7%)                                                       | 773 (714 to 844)              | 85 (78 to 93)                                                   | 13.4% (9.8% to 17.5%)                                                          |
| Guam                             | 16 (13 to 21)                 | 9 (7 to 12)                                                 | 2.4% (-4.3% to 9.1%)                                                       | 403 (375 to 441)              | 224 (209 to 245)                                                | 4.9% (0.6% to 9.1%)                                                            |
| Kiribati                         | 3 (3 to 4)                    | 3 (3 to 4)                                                  | 2.8% (-2.0% to 7.5%)                                                       | 65 (59 to 72)                 | 60 (56 to 66)                                                   | 16.4% (10.6% to 25.9%)                                                         |
| Marshall Islands                 | 2 (2 to 3)                    | 4 (4 to 5)                                                  | 6.7% (2.7% to 10.9%)                                                       | 43 (40 to 46)                 | 82 (76 to 88)                                                   | 7.1% (4.6% to 9.6%)                                                            |
| Micronesia (Federated States of) | 4 (3 to 5)                    | 5 (4 to 6)                                                  | 11.7% (6.2% to 17.6%)                                                      | 86 (78 to 95)                 | 90 (82 to 99)                                                   | 19.5% (14.1% to 28.3%)                                                         |
| Nauru                            | 1 (1 to 1)                    | 10 (8 to 13)                                                | 15.2% (8.4% to 22.5%)                                                      | 16 (15 to 18)                 | 185 (172 to 201)                                                | 14.8% (10.7% to 19.3%)                                                         |
| Niue                             | 0 (0 to 0)                    | 10 (8 to 13)                                                | 19.6% (11.0% to 28.6%)                                                     | 4 (4 to 4)                    | 216 (200 to 237)                                                | 24.8% (19.3% to 32.7%)                                                         |



1  
2  
3  
4  
5  
6  
7  
8  
9  
10  
11  
12  
13  
14  
15  
16  
17  
18  
19  
20  
21  
22  
23  
24  
25  
26  
27  
28  
29  
30  
31  
32  
33  
34  
35  
36  
37  
38  
39  
40  
41  
42  
43  
44  
45  
46

|                                     | Incidence                     |                                                             |                                                                            | Prevalence                    |                                                                 |                                                                                |
|-------------------------------------|-------------------------------|-------------------------------------------------------------|----------------------------------------------------------------------------|-------------------------------|-----------------------------------------------------------------|--------------------------------------------------------------------------------|
|                                     | Numbers<br>(95% UI)<br>(2019) | Age-standardized<br>rates per 100,000<br>(95% UI)<br>(2019) | Percentage change of age-<br>standardized rates<br>(95% UI)<br>(1990–2019) | Numbers<br>(95% UI)<br>(2019) | Age-standardized<br>estimates per 100,000<br>(95% UI)<br>(2019) | Percentage change of age-<br>standardized estimates<br>(95% UI)<br>(1990–2019) |
| Northern Mariana Islands            | 6 (4 to 7)                    | 13 (10 to 18)                                               | 6.9% (-3.6% to 17.6%)                                                      | 128 (119 to 140)              | 251 (232 to 273)                                                | 5.1% (0.7% to 9.5%)                                                            |
| Palau                               | 3 (2 to 4)                    | 17 (13 to 22)                                               | 17.1% (11.9% to 21.9%)                                                     | 60 (55 to 65)                 | 272 (252 to 298)                                                | 17.1% (13.5% to 20.7%)                                                         |
| Papua New Guinea                    | 414 (337 to 509)              | 5 (4 to 6)                                                  | 13.7% (-4.4% to 25.1%)                                                     | 8120 (7373 to 9247)           | 101 (92 to 114)                                                 | 35.9% (27.3% to 49.4%)                                                         |
| Samoa                               | 9 (7 to 11)                   | 5 (4 to 6)                                                  | -20.1% (-39.1% to -4.3%)                                                   | 239 (201 to 303)              | 128 (109 to 162)                                                | 52.3% (31.5% to 89.9%)                                                         |
| Solomon Islands                     | 31 (25 to 37)                 | 6 (5 to 7)                                                  | 14.7% (8.6% to 20.4%)                                                      | 501 (460 to 558)              | 95 (87 to 105)                                                  | 14.4% (8.0% to 19.4%)                                                          |
| Tokelau                             | 0 (0 to 0)                    | 9 (7 to 12)                                                 | 21.6% (13.2% to 30.4%)                                                     | 2 (2 to 3)                    | 187 (174 to 202)                                                | 24.7% (20.5% to 29.7%)                                                         |
| Tonga                               | 3 (3 to 4)                    | 4 (3 to 4)                                                  | -8.6% (-18.7% to 0.1%)                                                     | 75 (70 to 81)                 | 83 (78 to 90)                                                   | 6.6% (2.3% to 11.6%)                                                           |
| Tuvalu                              | 1 (1 to 1)                    | 9 (7 to 12)                                                 | 18.7% (11.1% to 26.9%)                                                     | 20 (18 to 21)                 | 173 (161 to 187)                                                | 23.8% (19.7% to 29.0%)                                                         |
| Vanuatu                             | 10 (8 to 12)                  | 4 (3 to 5)                                                  | 10.2% (6.5% to 14.3%)                                                      | 232 (201 to 282)              | 94 (81 to 113)                                                  | 19.5% (12.7% to 28.5%)                                                         |
| <b>North Africa and Middle East</b> | 52776 (34780 to 97680)        | 9 (6 to 17)                                                 | -32.7% (-60.7% to 8.9%)                                                    | 1597740 (989333 to 3176105)   | 264 (166 to 520)                                                | 5.0% (-19.4% to 21.4%)                                                         |
| <b>North Africa and Middle East</b> | 52776 (34780 to 97680)        | 9 (6 to 17)                                                 | -32.7% (-60.7% to 8.9%)                                                    | 1597740 (989333 to 3176105)   | 264 (166 to 520)                                                | 5.0% (-19.4% to 21.4%)                                                         |
| Afghanistan                         | 10452 (3261 to 29635)         | 44 (12 to 132)                                              | 308.3% (115.4% to 502.2%)                                                  | 229275 (64978 to 655574)      | 810 (225 to 2351)                                               | -48.0% (-65.9% to 41.6%)                                                       |
| Algeria                             | 1935 (1588 to 2368)           | 5 (4 to 6)                                                  | -6.7% (-13.1% to -0.4%)                                                    | 67773 (56104 to 95193)        | 160 (134 to 221)                                                | 20.1% (2.5% to 61.7%)                                                          |
| Bahrain                             | 65 (53 to 78)                 | 5 (4 to 6)                                                  | 5.6% (-2.2% to 13.4%)                                                      | 2464 (2288 to 2677)           | 137 (128 to 149)                                                | 16.2% (8.9% to 22.2%)                                                          |
| Egypt                               | 4060 (3281 to 5084)           | 4 (3 to 5)                                                  | 16.3% (6.6% to 33.8%)                                                      | 91724 (85282 to 100309)       | 100 (93 to 108)                                                 | 13.8% (8.4% to 21.8%)                                                          |

1  
2  
3  
4  
5  
6  
7  
8  
9  
10  
11  
12  
13  
14  
15  
16  
17  
18  
19  
20  
21  
22  
23  
24  
25  
26  
27  
28  
29  
30  
31  
32  
33  
34  
35  
36  
37  
38  
39  
40  
41  
42  
43  
44  
45  
46

|                            | Incidence                     |                                                             |                                                                            | Prevalence                    |                                                                 |                                                                                |
|----------------------------|-------------------------------|-------------------------------------------------------------|----------------------------------------------------------------------------|-------------------------------|-----------------------------------------------------------------|--------------------------------------------------------------------------------|
|                            | Numbers<br>(95% UI)<br>(2019) | Age-standardized<br>rates per 100,000<br>(95% UI)<br>(2019) | Percentage change of age-<br>standardized rates<br>(95% UI)<br>(1990–2019) | Numbers<br>(95% UI)<br>(2019) | Age-standardized<br>estimates per 100,000<br>(95% UI)<br>(2019) | Percentage change of age-<br>standardized estimates<br>(95% UI)<br>(1990–2019) |
| Iran (Islamic Republic of) | 4164 (3373 to 5116)           | 5 (4 to 6)                                                  | -90.2% (-94.8% to -81.2%)                                                  | 192392 (147592 to 289632)     | 209 (163 to 308)                                                | -37.1% (-55.4% to -15%)                                                        |
| Iraq                       | 3076 (2202 to 4940)           | 7 (5 to 11)                                                 | -32.4% (-44.7% to -15.8%)                                                  | 275649 (100535 to 735044)     | 694 (261 to 1839)                                               | -23.3% (-32.7% to -11.6%)                                                      |
| Jordan                     | 456 (379 to 543)              | 4 (3 to 5)                                                  | -1.1% (-6.7% to 4.5%)                                                      | 12356 (11428 to 13714)        | 118 (110 to 129)                                                | 10.9% (5.8% to 19.5%)                                                          |
| Kuwait                     | 222 (183 to 267)              | 5 (4 to 6)                                                  | -86.3% (-94.9% to -60.5%)                                                  | 8925 (7309 to 12662)          | 179 (150 to 246)                                                | 12.6% (3.7% to 28.4%)                                                          |
| Lebanon                    | 244 (201 to 294)              | 5 (4 to 6)                                                  | -71.5% (-87.7% to -37.5%)                                                  | 21407 (8783 to 61368)         | 400 (164 to 1148)                                               | -50.2% (-57.6% to -27.9%)                                                      |
| Libya                      | 815 (471 to 1647)             | 12 (7 to 24)                                                | 141.6% (40.5% to 405.8%)                                                   | 20977 (12852 to 41589)        | 287 (177 to 573)                                                | 71.0% (31.2% to 126.2%)                                                        |
| Morocco                    | 1836 (1507 to 2226)           | 5 (4 to 6)                                                  | 8.0% (2.9% to 13.7%)                                                       | 49136 (45658 to 53596)        | 133 (124 to 145)                                                | 4.1% (-6.6% to 10.5%)                                                          |
| Oman                       | 279 (226 to 355)              | 7 (5 to 9)                                                  | -0.5% (-7.3% to 6.9%)                                                      | 7431 (6863 to 8020)           | 160 (150 to 171)                                                | 9.3% (5.5% to 13.7%)                                                           |
| Palestine                  | 254 (207 to 324)              | 5 (4 to 7)                                                  | -66.9% (-83.5% to -29.6%)                                                  | 34617 (12023 to 92970)        | 814 (289 to 2164)                                               | 16.1% (1.3% to 24.0%)                                                          |
| Qatar                      | 204 (168 to 248)              | 7 (6 to 8)                                                  | -3.2% (-10.3% to 3.5%)                                                     | 5438 (5015 to 5874)           | 172 (160 to 184)                                                | -0.5% (-4.4% to 3.4%)                                                          |
| Saudi Arabia               | 4304 (3458 to 5275)           | 12 (9 to 14)                                                | 33.3% (26.1% to 40.4%)                                                     | 99232 (90735 to 108803)       | 256 (237 to 279)                                                | 27.2% (21.8% to 32.6%)                                                         |
| Sudan                      | 3305 (2618 to 4000)           | 9 (7 to 12)                                                 | -43.6% (-72.1% to -7.9%)                                                   | 88763 (69261 to 108265)       | 274 (218 to 405)                                                | 31.5% (19.6% to 50.5%)                                                         |

1  
2  
3  
4  
5  
6  
7  
8  
9  
10  
11  
12  
13  
14  
15  
16  
17  
18  
19  
20  
21  
22  
23  
24  
25  
26  
27  
28  
29  
30  
31  
32  
33  
34  
35  
36  
37  
38  
39  
40  
41  
42  
43  
44  
45  
46

|                      | Incidence                     |                                                             |                                                                            | Prevalence                    |                                                                 |                                                                                |
|----------------------|-------------------------------|-------------------------------------------------------------|----------------------------------------------------------------------------|-------------------------------|-----------------------------------------------------------------|--------------------------------------------------------------------------------|
|                      | Numbers<br>(95% UI)<br>(2019) | Age-standardized<br>rates per 100,000<br>(95% UI)<br>(2019) | Percentage change of age-<br>standardized rates<br>(95% UI)<br>(1990–2019) | Numbers<br>(95% UI)<br>(2019) | Age-standardized<br>estimates per 100,000<br>(95% UI)<br>(2019) | Percentage change of age-<br>standardized estimates<br>(95% UI)<br>(1990–2019) |
|                      | 4167)                         |                                                             |                                                                            | 135844)                       |                                                                 |                                                                                |
| Syrian Arab Republic | 2762 (1061 to 7102)           | 26 (9 to 69)                                                | 548.3% (131.1% to 1510.3%)                                                 | 146780 (46392 to 407902)      | 1049 (333 to 2942)                                              | 567.8% (215.4% to 1184.7%)                                                     |
| Tunisia              | 574 (467 to 697)              | 5 (4 to 6)                                                  | 6.1% (-0.9% to 13.0%)                                                      | 16698 (15691 to 17935)        | 130 (122 to 140)                                                | 8.6% (3.7% to 13.4%)                                                           |
| Turkey               | 4391 (3619 to 5398)           | 5 (4 to 6)                                                  | 11.1% (-9.0% to 28.1%)                                                     | 139191 (121472 to 172113)     | 151 (132 to 188)                                                | 47.9% (32.9% to 75.7%)                                                         |
| United Arab Emirates | 562 (454 to 695)              | 6 (5 to 7)                                                  | -3.5% (-8.2% to 1.3%)                                                      | 17277 (16071 to 18581)        | 139 (131 to 148)                                                | -1.2% (-5.1% to 1.8%)                                                          |
| Yemen                | 8763 (2941 to 24072)          | 26 (9 to 70)                                                | 510.5% (122.1% to 1565%)                                                   | 68611 (34516 to 160572)       | 260 (137 to 595)                                                | 74.1% (25.0% to 134.1%)                                                        |
| South Asia           | 156382 (120425 to 201426)     | 9 (7 to 12)                                                 | 5.1% (-7.8% to 12.8%)                                                      | 3161582 (2952968 to 3412943)  | 188 (176 to 202)                                                | 22.9% (19.5% to 27.1%)                                                         |
| South Asia           | 156382 (120425 to 201426)     | 9 (7 to 12)                                                 | 5.1% (-7.8% to 12.8%)                                                      | 3161582 (2952968 to 3412943)  | 188 (176 to 202)                                                | 22.9% (19.5% to 27.1%)                                                         |
| Bangladesh           | 8139 (6241 to 10775)          | 5 (4 to 7)                                                  | 4.4% (-3.6% to 11.1%)                                                      | 229245 (204809 to 265803)     | 148 (132 to 171)                                                | 41.0% (33.7% to 50.7%)                                                         |
| Bhutan               | 52 (41 to 68)                 | 7 (6 to 9)                                                  | 28.4% (20.1% to 38.7%)                                                     | 1192 (1113 to 1276)           | 166 (156 to 177)                                                | 43.6% (37.9% to 50.9%)                                                         |
| India                | 134888 (103757 to 173814)     | 10 (8 to 13)                                                | 2.1% (-11.3% to 10.4%)                                                     | 2620689 (2458704 to 2800787)  | 197 (185 to 211)                                                | 18.6% (15.6% to 21.5%)                                                         |

1  
2  
3  
4  
5  
6  
7  
8  
9  
10  
11  
12  
13  
14  
15  
16  
17  
18  
19  
20  
21  
22  
23  
24  
25  
26  
27  
28  
29  
30  
31  
32  
33  
34  
35  
36  
37  
38  
39  
40  
41  
42  
43  
44  
45  
46

|                                    | Incidence                     |                                                             |                                                                            | Prevalence                    |                                                                 |                                                                                |
|------------------------------------|-------------------------------|-------------------------------------------------------------|----------------------------------------------------------------------------|-------------------------------|-----------------------------------------------------------------|--------------------------------------------------------------------------------|
|                                    | Numbers<br>(95% UI)<br>(2019) | Age-standardized<br>rates per 100,000<br>(95% UI)<br>(2019) | Percentage change of age-<br>standardized rates<br>(95% UI)<br>(1990–2019) | Numbers<br>(95% UI)<br>(2019) | Age-standardized<br>estimates per 100,000<br>(95% UI)<br>(2019) | Percentage change of age-<br>standardized estimates<br>(95% UI)<br>(1990–2019) |
| Nepal                              | 2007 (1633 to 2454)           | 7 (6 to 9)                                                  | 11.0% (7.1% to 14.4%)                                                      | 50961 (44198 to 63223)        | 183 (160 to 222)                                                | 50.6% (35.5% to 80.4%)                                                         |
| Pakistan                           | 11294 (8483 to 15235)         | 6 (4 to 8)                                                  | 21.7% (14.9% to 28.3%)                                                     | 259494 (229416 to 318122)     | 144 (129 to 172)                                                | 51.5% (37.9% to 77.7%)                                                         |
| <b>Sub-Saharan Africa</b>          | 79227 (60108 to 104346)       | 9 (7 to 13)                                                 | -46.4% (-70.9% to -17%)                                                    | 1683535 (1394868 to 2363973)  | 211 (177 to 288)                                                | 9.1% (4.8% to 13.0%)                                                           |
| <b>Southern Sub-Saharan Africa</b> | 6590 (5072 to 8666)           | 9 (7 to 12)                                                 | -12.0% (-16.5% to -8.4%)                                                   | 125520 (117191 to 135338)     | 171 (160 to 184)                                                | -20.3% (-25.3% to -17.5%)                                                      |
| Botswana                           | 201 (155 to 267)              | 10 (7 to 13)                                                | 12.1% (6.3% to 17.3%)                                                      | 3919 (3628 to 4221)           | 178 (166 to 191)                                                | 13.3% (10.5% to 16.5%)                                                         |
| Eswatini                           | 90 (69 to 119)                | 9 (7 to 12)                                                 | 13.7% (9.7% to 18.0%)                                                      | 1458 (1350 to 1563)           | 150 (140 to 160)                                                | -3.1% (-5.3% to -0.7%)                                                         |
| Lesotho                            | 184 (142 to 241)              | 10 (7 to 13)                                                | 20.6% (12.5% to 29.1%)                                                     | 2692 (2508 to 2885)           | 139 (130 to 149)                                                | -4.7% (-7.5% to -1.2%)                                                         |
| Namibia                            | 202 (154 to 267)              | 10 (7 to 13)                                                | 8.1% (4.7% to 11.7%)                                                       | 4126 (3720 to 4849)           | 201 (182 to 237)                                                | -22.6% (-48.4% to 1.6%)                                                        |
| South Africa                       | 4748 (3614 to 6370)           | 9 (7 to 12)                                                 | -18.9% (-23.8% to -15.2%)                                                  | 96685 (90104 to 104482)       | 176 (165 to 190)                                                | -24.1% (-29.5% to -21.1%)                                                      |
| Zimbabwe                           | 1164 (911 to 1469)            | 10 (8 to 13)                                                | 12.7% (2.0% to 32.6%)                                                      | 16640 (15505 to 17907)        | 140 (132 to 151)                                                | -7.3% (-9.5% to -5.0%)                                                         |
| <b>Western Sub-Saharan Africa</b>  | 38162 (28265 to 51944)        | 11 (8 to 15)                                                | 3.4% (-5.4% to 8.0%)                                                       | 686804 (626081 to 784464)     | 215 (198 to 241)                                                | 17.7% (14.0% to 26.0%)                                                         |
| Benin                              | 1004 (729 to 1385)            | 11 (8 to 15)                                                | 5.8% (2.4% to 9.3%)                                                        | 17311 (16106 to 18602)        | 207 (193 to 222)                                                | 11.1% (8.9% to 13.4%)                                                          |

1  
2  
3  
4  
5  
6  
7  
8  
9  
10  
11  
12  
13  
14  
15  
16  
17  
18  
19  
20  
21  
22  
23  
24  
25  
26  
27  
28  
29  
30  
31  
32  
33  
34  
35  
36  
37  
38  
39  
40  
41  
42  
43  
44  
45  
46

|               | Incidence                     |                                                             |                                                                            | Prevalence                    |                                                                 |                                                                                |
|---------------|-------------------------------|-------------------------------------------------------------|----------------------------------------------------------------------------|-------------------------------|-----------------------------------------------------------------|--------------------------------------------------------------------------------|
|               | Numbers<br>(95% UI)<br>(2019) | Age-standardized<br>rates per 100,000<br>(95% UI)<br>(2019) | Percentage change of age-<br>standardized rates<br>(95% UI)<br>(1990–2019) | Numbers<br>(95% UI)<br>(2019) | Age-standardized<br>estimates per 100,000<br>(95% UI)<br>(2019) | Percentage change of age-<br>standardized estimates<br>(95% UI)<br>(1990–2019) |
| Burkina Faso  | 2207 (1612 to 3054)           | 13 (10 to 18)                                               | 28.1% (18.4% to 49.1%)                                                     | 32023 (29801 to 34408)        | 212 (198 to 228)                                                | 32.0% (29.5% to 34.7%)                                                         |
| Cabo Verde    | 57 (43 to 76)                 | 11 (8 to 14)                                                | 24.9% (20.3% to 29.7%)                                                     | 1197 (1120 to 1284)           | 229 (215 to 245)                                                | 22.3% (19.4% to 25.5%)                                                         |
| Cameroon      | 2960 (2102 to 4128)           | 14 (10 to 19)                                               | 15.9% (9.2% to 27.2%)                                                      | 48942 (44632 to 54262)        | 234 (214 to 256)                                                | 6.8% (2.4% to 12.4%)                                                           |
| Chad          | 1275 (939 to 1744)            | 11 (8 to 15)                                                | -11.7% (-39.3% to 10.5%)                                                   | 22401 (19089 to 30056)        | 225 (193 to 296)                                                | -2.6% (-23.6% to 14.9%)                                                        |
| Côte d'Ivoire | 2179 (1598 to 2998)           | 12 (9 to 16)                                                | 2.4% (-0.8% to 5.7%)                                                       | 39548 (36200 to 43009)        | 206 (191 to 222)                                                | 12.7% (9.8% to 17.8%)                                                          |
| Gambia        | 170 (127 to 229)              | 10 (8 to 14)                                                | 10.6% (7.3% to 13.7%)                                                      | 3008 (2775 to 3265)           | 189 (175 to 206)                                                | 1.4% (-12.1% to 8.9%)                                                          |
| Ghana         | 3340 (2335 to 4766)           | 13 (9 to 18)                                                | 19.6% (16.1% to 23.5%)                                                     | 62838 (57513 to 68360)        | 248 (228 to 270)                                                | 23.3% (20.7% to 25.8%)                                                         |
| Guinea        | 1043 (750 to 1460)            | 11 (8 to 16)                                                | 14.7% (10.8% to 18.6%)                                                     | 17737 (16424 to 19192)        | 205 (190 to 221)                                                | 15.8% (12.5% to 20.8%)                                                         |
| Guinea-Bissau | 178 (124 to 255)              | 12 (9 to 17)                                                | 0.8% (-2.3% to 3.8%)                                                       | 3078 (2793 to 3426)           | 222 (202 to 246)                                                | 14.5% (9.4% to 24.1%)                                                          |
| Liberia       | 339 (250 to 461)              | 9 (7 to 13)                                                 | -86% (-95.2% to -53.4%)                                                    | 10240 (6993 to 18359)         | 276 (195 to 483)                                                | 41.5% (14.8% to 87.6%)                                                         |
| Mali          | 1931 (1389 to 2803)           | 12 (9 to 17)                                                | -1.2% (-11.6% to 5.6%)                                                     | 33763 (27877 to 47737)        | 235 (198 to 321)                                                | 36.6% (18.2% to 81.7%)                                                         |
| Mauritania    | 383 (269 to 545)              | 12 (8 to 17)                                                | -8.9% (-15.6% to -3.5%)                                                    | 7623 (7004 to 8283)           | 257 (236 to 279)                                                | 6.5% (4.7% to 8.1%)                                                            |

1  
2  
3  
4  
5  
6  
7  
8  
9  
10  
11  
12  
13  
14  
15  
16  
17  
18  
19  
20  
21  
22  
23  
24  
25  
26  
27  
28  
29  
30  
31  
32  
33  
34  
35  
36  
37  
38  
39  
40  
41  
42  
43  
44  
45  
46

|                                   | Incidence                     |                                                             |                                                                            | Prevalence                    |                                                                 |                                                                                |
|-----------------------------------|-------------------------------|-------------------------------------------------------------|----------------------------------------------------------------------------|-------------------------------|-----------------------------------------------------------------|--------------------------------------------------------------------------------|
|                                   | Numbers<br>(95% UI)<br>(2019) | Age-standardized<br>rates per 100,000<br>(95% UI)<br>(2019) | Percentage change of age-<br>standardized rates<br>(95% UI)<br>(1990–2019) | Numbers<br>(95% UI)<br>(2019) | Age-standardized<br>estimates per 100,000<br>(95% UI)<br>(2019) | Percentage change of age-<br>standardized estimates<br>(95% UI)<br>(1990–2019) |
| Niger                             | 1736 (1306 to 2329)           | 11 (8 to 15)                                                | 2.7% (-2.8% to 6.7%)                                                       | 26780 (24637 to 29399)        | 196 (182 to 212)                                                | 12.7% (9.9% to 16.3%)                                                          |
| Nigeria                           | 16736 (12504 to 22446)        | 11 (8 to 14)                                                | 9.2% (4.9% to 17.8%)                                                       | 307508 (280722 to 351514)     | 205 (189 to 228)                                                | 16.8% (12% to 27.8%)                                                           |
| Sao Tome and Principe             | 21 (16 to 28)                 | 13 (10 to 18)                                               | 24.0% (19.8% to 28.1%)                                                     | 415 (386 to 446)              | 257 (241 to 276)                                                | 22.9% (19.3% to 26.1%)                                                         |
| Senegal                           | 1219 (885 to 1673)            | 11 (8 to 15)                                                | 3.0% (-5.8% to 8.2%)                                                       | 22726 (20984 to 24629)        | 205 (190 to 223)                                                | 16.3% (13.4% to 20.4%)                                                         |
| Sierra Leone                      | 667 (479 to 929)              | 11 (8 to 15)                                                | 10.6% (7.3% to 14%)                                                        | 16180 (12691 to 24462)        | 265 (211 to 392)                                                | 54.6% (24.7% to 126.6%)                                                        |
| Togo                              | 716 (511 to 1016)             | 11 (8 to 16)                                                | 4.7% (1.4% to 7.6%)                                                        | 13475 (12407 to 14597)        | 220 (204 to 238)                                                | 6.1% (3.8% to 8.9%)                                                            |
| <b>Eastern Sub-Saharan Africa</b> | 29156 (22453 to 37652)        | 9 (7 to 12)                                                 | -69.8% (-86.8% to -36.8%)                                                  | 712913 (537596 to 1156257)    | 234 (179 to 377)                                                | 8.3% (-3.2% to 15.3%)                                                          |
| Burundi                           | 521 (402 to 674)              | 5 (4 to 7)                                                  | -0.9% (-6.9% to 10.2%)                                                     | 67502 (22199 to 188953)       | 703 (242 to 1936)                                               | 799.8% (206.9% to 2316.4%)                                                     |
| Comoros                           | 86 (62 to 122)                | 13 (10 to 19)                                               | 2.6% (-1.2% to 6.9%)                                                       | 1849 (1703 to 2001)           | 291 (269 to 315)                                                | 15.7% (12.9% to 18.5%)                                                         |
| Djibouti                          | 119 (88 to 161)               | 12 (9 to 16)                                                | -21% (-47.9% to -2.2%)                                                     | 2603 (2361 to 2969)           | 254 (233 to 287)                                                | 10.3% (5.6% to 20%)                                                            |
| Eritrea                           | 635 (467 to 861)              | 12 (9 to 16)                                                | -89.2% (-96.5% to -59.7%)                                                  | 23173 (13141 to 51188)        | 449 (255 to 978)                                                | -53.5% (-64.8% to -19.5%)                                                      |
| Ethiopia                          | 4139 (3323 to 5000)           | 5 (4 to 6)                                                  | -93.3% (-97.5% to -78%)                                                    | 140703 (87440 to 214000)      | 182 (114 to 366)                                                | 6.0% (-7.0% to 29.3%)                                                          |

1  
2  
3  
4  
5  
6  
7  
8  
9  
10  
11  
12  
13  
14  
15  
16  
17  
18  
19  
20  
21  
22  
23  
24  
25  
26  
27  
28  
29  
30  
31  
32  
33  
34  
35  
36  
37  
38  
39  
40  
41  
42  
43  
44  
45  
46

|                             | Incidence                     |                                                             |                                                                            | Prevalence                    |                                                                 |                                                                                |
|-----------------------------|-------------------------------|-------------------------------------------------------------|----------------------------------------------------------------------------|-------------------------------|-----------------------------------------------------------------|--------------------------------------------------------------------------------|
|                             | Numbers<br>(95% UI)<br>(2019) | Age-standardized<br>rates per 100,000<br>(95% UI)<br>(2019) | Percentage change of age-<br>standardized rates<br>(95% UI)<br>(1990–2019) | Numbers<br>(95% UI)<br>(2019) | Age-standardized<br>estimates per 100,000<br>(95% UI)<br>(2019) | Percentage change of age-<br>standardized estimates<br>(95% UI)<br>(1990–2019) |
|                             | 5096)                         |                                                             |                                                                            | 285059)                       |                                                                 |                                                                                |
| Kenya                       | 1995 (1580 to<br>2483)        | 5 (4 to 6)                                                  | 0.3% (-1.5% to 2.6%)                                                       | 40838 (36708 to<br>49228)     | 100 (92 to 116)                                                 | 13.0% (5.7% to 30.0%)                                                          |
| Madagascar                  | 2400 (1784 to<br>3217)        | 11 (8 to 15)                                                | -2.7% (-7.0% to 2.5%)                                                      | 44949 (41190 to<br>49020)     | 221 (204 to 240)                                                | 3.3% (0.4% to 6.1%)                                                            |
| Malawi                      | 1498 (1148 to<br>1968)        | 10 (8 to 14)                                                | 2.3% (-2.3% to 7.1%)                                                       | 25880 (23743 to<br>28080)     | 193 (179 to 208)                                                | 17.1% (13.5% to 20.6%)                                                         |
| Mozambique                  | 3459 (2568 to<br>4656)        | 16 (12 to 22)                                               | -7.9% (-43.1% to 18.4%)                                                    | 54653 (47593 to<br>69114)     | 275 (237 to 357)                                                | -39.7% (-64.2% to -6.4%)                                                       |
| Rwanda                      | 1281 (933 to<br>1771)         | 12 (9 to 17)                                                | -50.6% (-74.7% to -23.1%)                                                  | 62514 (31791 to<br>142164)    | 605 (316 to 1347)                                               | 157.9% (37.2% to 467.9%)                                                       |
| Somalia                     | 2192 (1537 to<br>3307)        | 13 (10 to 20)                                               | -39.4% (-61.2% to -10.6%)                                                  | 38706 (28493 to<br>65501)     | 259 (199 to 421)                                                | 19.0% (-34.3% to 71.2%)                                                        |
| South Sudan                 | 964 (698 to 1429)             | 13 (9 to 18)                                                | 6.4% (-5.1% to 34.7%)                                                      | 23709 (16946 to<br>41158)     | 344 (255 to 567)                                                | 23.3% (8.9% to 45.7%)                                                          |
| Uganda                      | 3506 (2626 to<br>4657)        | 11 (8 to 15)                                                | -7.6% (-27.4% to 3.4%)                                                     | 69689 (60102 to<br>90469)     | 254 (219 to 333)                                                | -16.5% (-49.7% to 25.6%)                                                       |
| United Republic of Tanzania | 4873 (3700 to<br>6437)        | 11 (8 to 15)                                                | 0.1% (-3.9% to 4.3%)                                                       | 90556 (83657 to<br>98054)     | 220 (206 to 237)                                                | 16.7% (14.1% to 19.2%)                                                         |
| Zambia                      | 1463 (1123 to                 | 11 (8 to 14)                                                | 3.8% (-2.1% to 9.4%)                                                       | 25020 (22961 to               | 188 (175 to 203)                                                | 18.7% (14.9% to 22.6%)                                                         |

1  
2  
3  
4  
5  
6  
7  
8  
9  
10  
11  
12  
13  
14  
15  
16  
17  
18  
19  
20  
21  
22  
23  
24  
25  
26

|                                   | Incidence                     |                                                             |                                                                            | Prevalence                    |                                                                 |                                                                                |
|-----------------------------------|-------------------------------|-------------------------------------------------------------|----------------------------------------------------------------------------|-------------------------------|-----------------------------------------------------------------|--------------------------------------------------------------------------------|
|                                   | Numbers<br>(95% UI)<br>(2019) | Age-standardized<br>rates per 100,000<br>(95% UI)<br>(2019) | Percentage change of age-<br>standardized rates<br>(95% UI)<br>(1990–2019) | Numbers<br>(95% UI)<br>(2019) | Age-standardized<br>estimates per 100,000<br>(95% UI)<br>(2019) | Percentage change of age-<br>standardized estimates<br>(95% UI)<br>(1990–2019) |
|                                   | 1917)                         |                                                             |                                                                            | 27064)                        |                                                                 |                                                                                |
| <b>Central Sub-Saharan Africa</b> | 5318 (3976 to 7773)           | 5 (4 to 6)                                                  | -29.1% (-48% to -10.3%)                                                    | 158299 (92933 to 330433)      | 154 (93 to 313)                                                 | 30.4% (16.9% to 44.5%)                                                         |
| Angola                            | 971 (759 to 1233)             | 4 (3 to 5)                                                  | -77.1% (-90.9% to -43.8%)                                                  | 45818 (23083 to 106888)       | 217 (109 to 508)                                                | -34.2% (-42.1% to -15.1%)                                                      |
| Central African Republic          | 365 (208 to 741)              | 7 (4 to 14)                                                 | 93.1% (24.9% to 269.5%)                                                    | 9062 (4135 to 21755)          | 178 (89 to 409)                                                 | 224.5% (63.6% to 624%)                                                         |
| Congo                             | 167 (131 to 213)              | 4 (3 to 5)                                                  | -6.2% (-8.9% to -3.3%)                                                     | 8752 (4373 to 19792)          | 184 (96 to 407)                                                 | 191.1% (55.0% to 531%)                                                         |
| Democratic Republic of the Congo  | 3704 (2691 to 5623)           | 5 (4 to 7)                                                  | 17.8% (3.5% to 51.4%)                                                      | 92511 (58980 to 179752)       | 132 (88 to 245)                                                 | 90.4% (29.4% to 249.7%)                                                        |
| Equatorial Guinea                 | 45 (35 to 57)                 | 4 (3 to 5)                                                  | 2.8% (-2.9% to 7.9%)                                                       | 830 (772 to 898)              | 77 (73 to 82)                                                   | 26.2% (22.1% to 30.4%)                                                         |
| Gabon                             | 67 (53 to 86)                 | 4 (3 to 6)                                                  | -1.3% (-4.5% to 2.9%)                                                      | 1326 (1248 to 1413)           | 86 (82 to 92)                                                   | 6.5% (4.2% to 8.9%)                                                            |

27 Abbreviations: UI, uncertainty interval

28  
29  
30  
31  
32  
33  
34  
35  
36  
37  
38  
39  
40  
41  
42  
43  
44  
45  
46



1  
2  
3  
4  
5  
6  
7  
8  
9  
10  
11  
12  
13  
14  
15  
16  
17  
18  
19  
20  
21  
22  
23  
24  
25  
26  
27

**A**

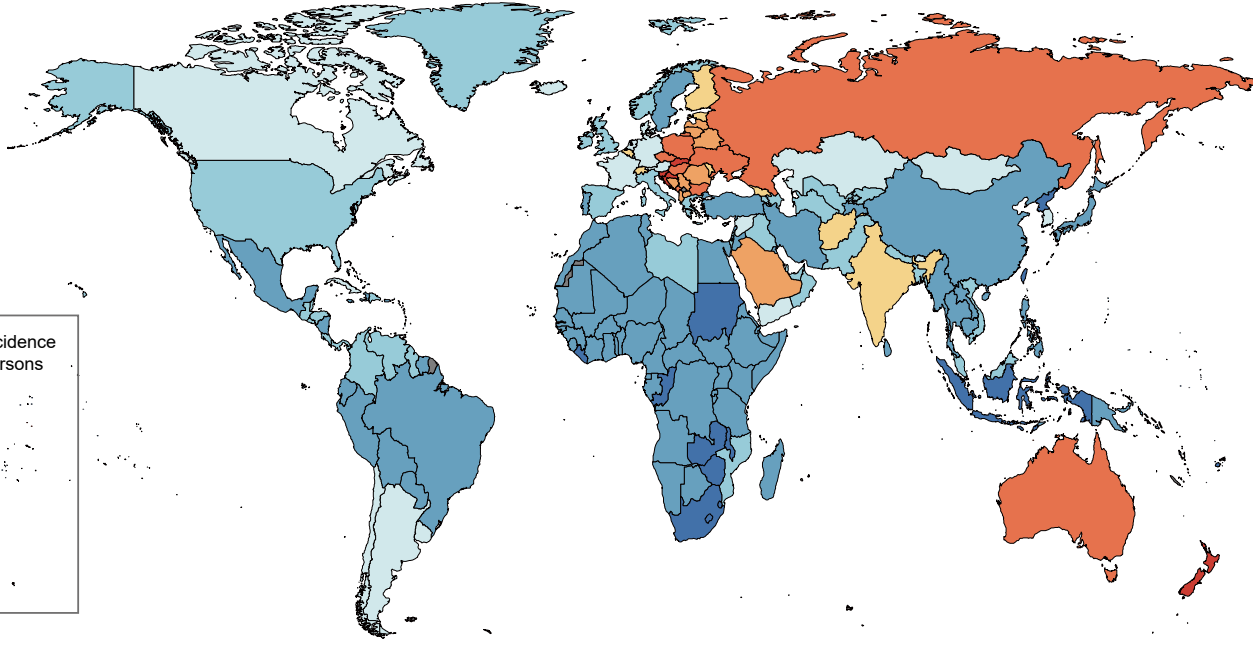

28  
29  
30  
31  
32  
33  
34  
35  
36  
37  
38  
39  
40  
41  
42  
43  
44  
45  
46  
47  
48  
49  
50  
51  
52  
53  
54  
55  
56  
57  
58  
59  
60

**B**

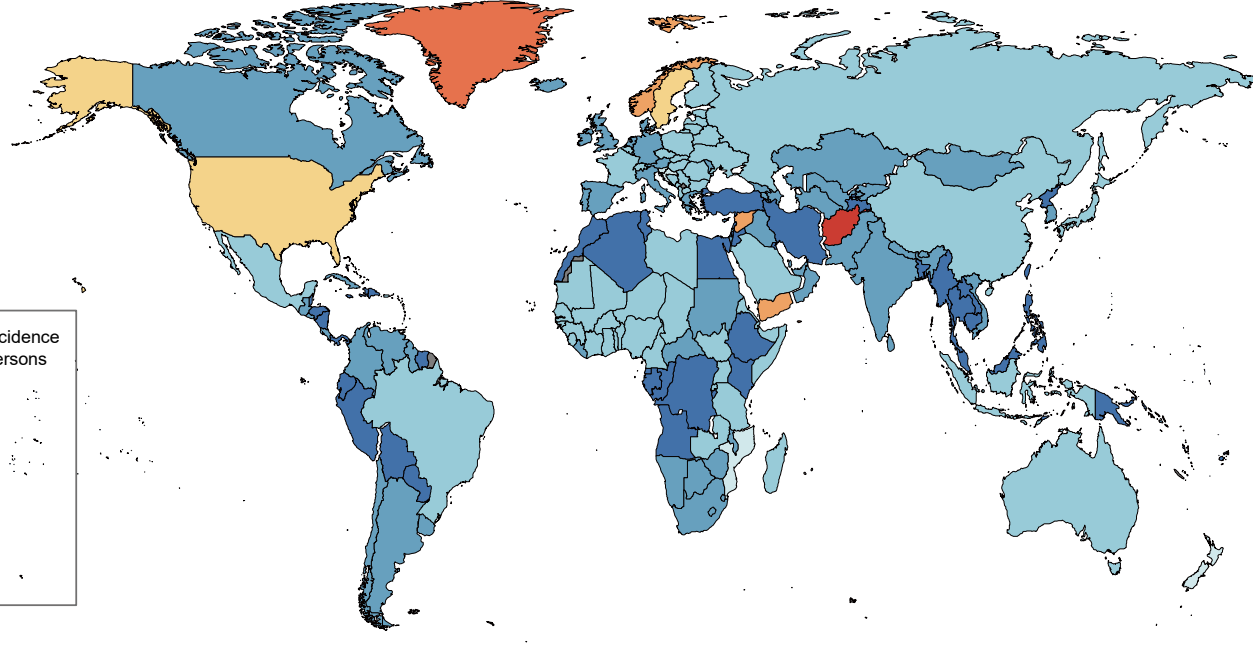

1  
2  
3  
4  
5  
6  
7  
8  
9  
10  
11  
12  
13  
14  
15  
16  
17  
18  
19  
20  
21  
22  
23  
24  
25  
26  
27  
28  
29  
30  
31  
32  
33  
34  
35  
36  
37  
38  
39  
40  
41  
42  
43  
44  
45  
46  
47  
48  
49  
50  
51  
52  
53  
54  
55  
56  
57  
58  
59  
60

**A**

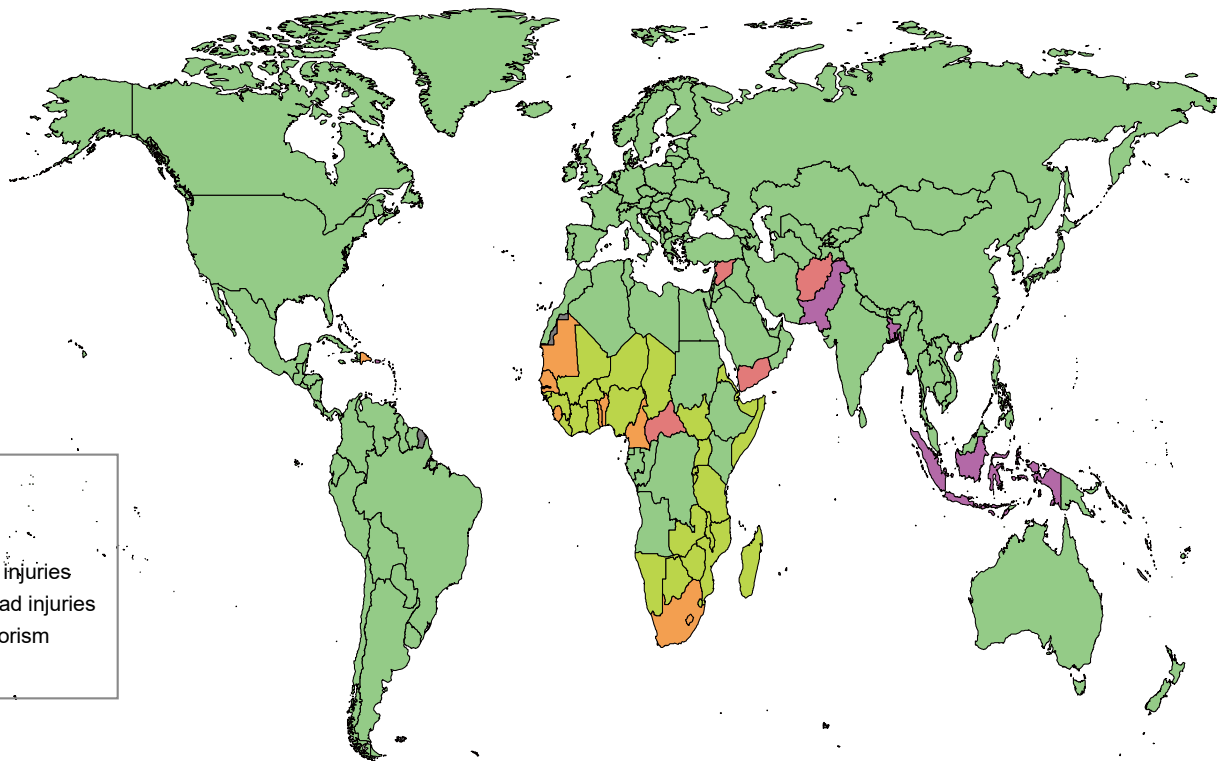

**B**

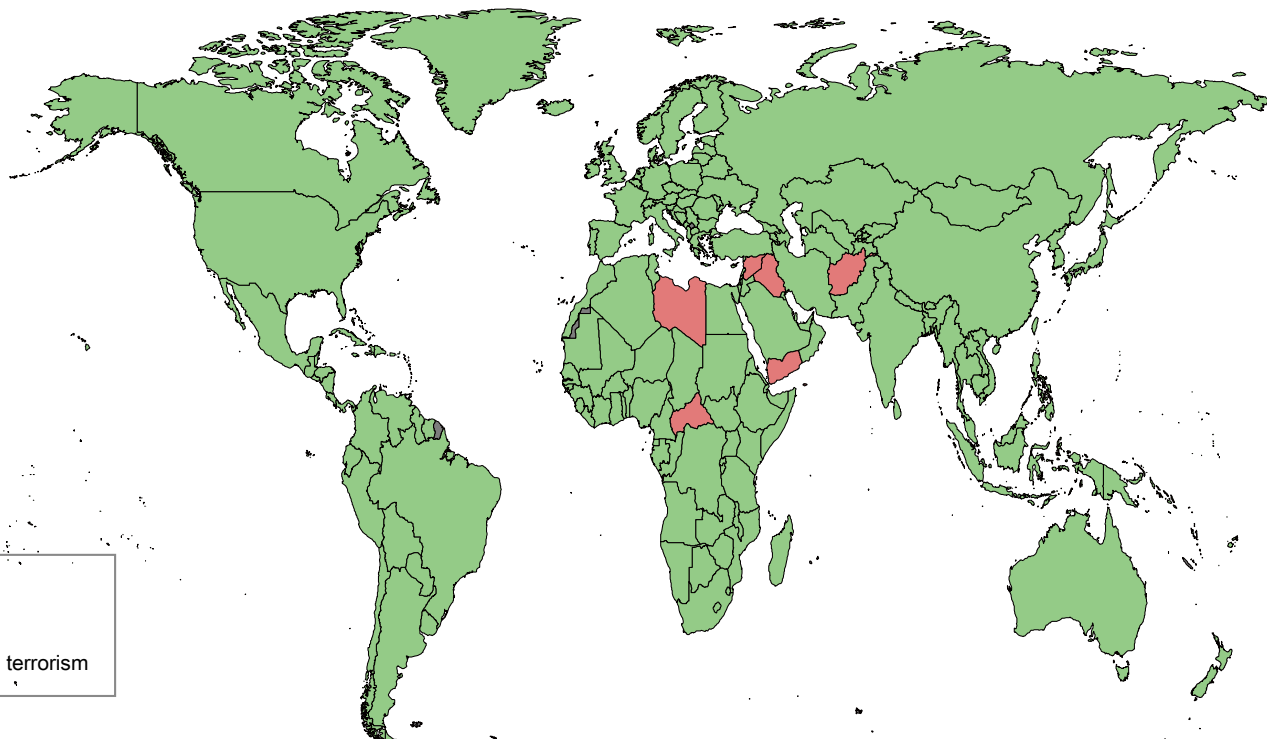

1  
2  
3  
4  
5  
6  
7  
8  
9  
10  
11  
12  
13  
14  
15  
16  
17  
18  
19  
20  
21  
22  
23  
24  
25  
26  
27  
28  
29  
30  
31  
32  
33  
34  
35  
36  
37  
38  
39  
40  
41  
42  
43  
44  
45  
46  
47  
48  
49  
50  
51  
52  
53  
54  
55  
56  
57  
58  
59  
60

**A**

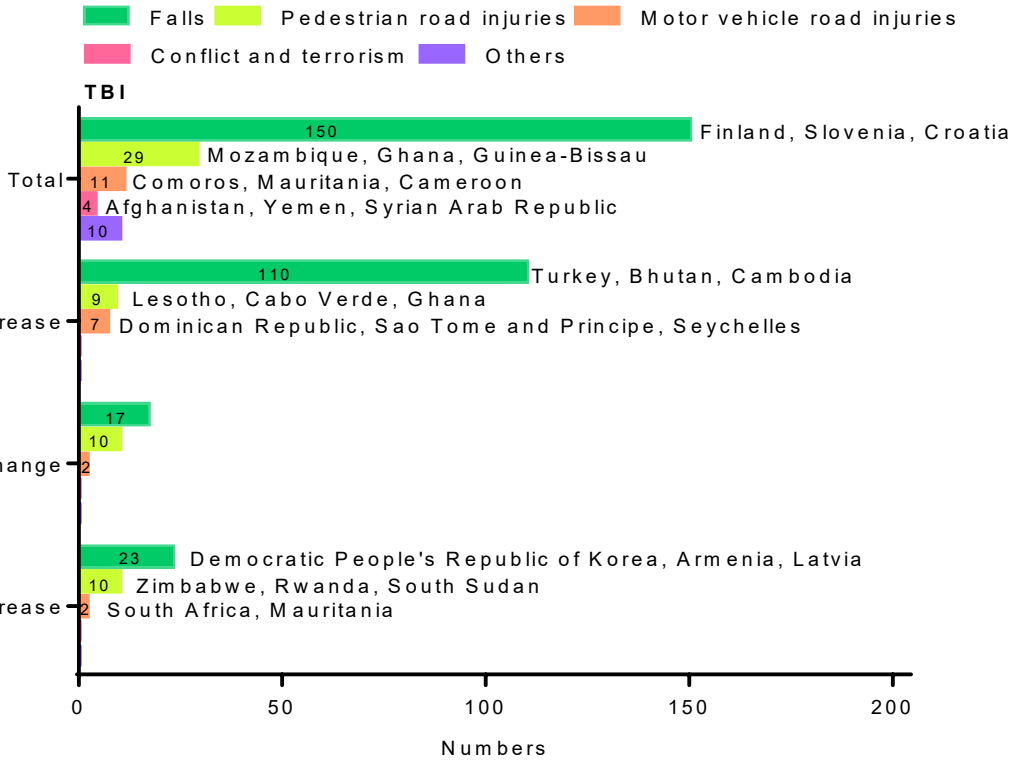

**B**

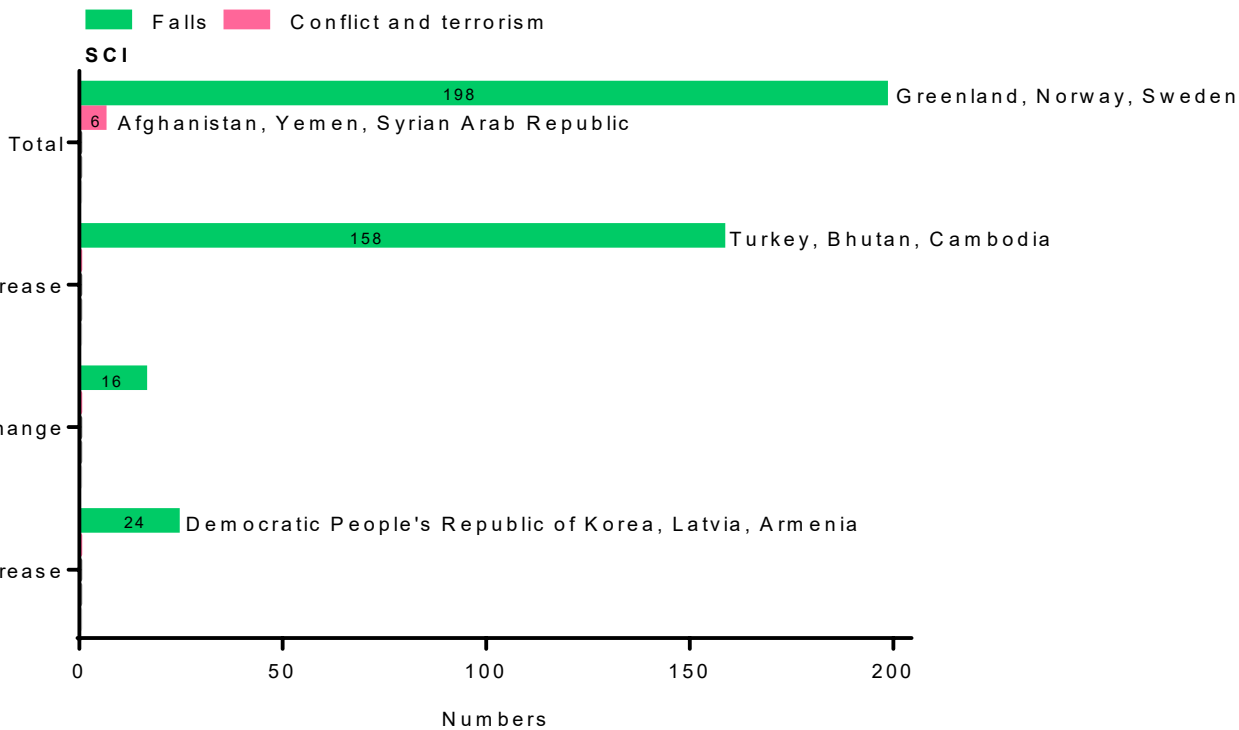

## Supplementary materials

GATHER checklist of information that should be included in new reports of global health  
STROBE Statement—Checklist of items that should be included in reports of **cross-sectional studies**

**eFigure 1.** Incidence of traumatic brain injury worldwide

**eFigure 2.** Prevalence of traumatic brain injury worldwide

**eFigure 3.** Years lived with disability of traumatic brain injury worldwide

**eFigure 4.** Incidence of spinal cord injury worldwide

**eFigure 5.** Prevalence of spinal cord injury worldwide

**eFigure 6.** Years lived with disability of spinal cord injury worldwide

**eFigure 7.** Associations between Socio-demographic Index (SDI) and age-standardized years lived with disability (YLDs) rates of traumatic brain injury and spinal cord injury in 204 countries and territories

**eTable 1.** Global Burden of Disease severity hierarchy for nature-of-injury

**eTable 2.** Global Burden of Disease lay descriptions and disability weights for health states

**eTable 3.** Global Burden of Disease (GBD) location hierarchy: 7 GBD super regions, 21 GBD regions, and 204 countries and territories

**eTable 4.** Global Burden of Disease world population standard

**eTable 5.** Global Burden of Disease (GBD) cause hierarchy with levels for injuries

**eTable 6.** Global Burden of Disease locational ISO3 code and Socio-demographic Index (SDI), 2019

**eTable 7.** Years lived with disability for 2019 and percentage changes of age-standardized rates by location for traumatic brain injury, 1990–2019

**eTable 8.** Incidence, prevalence, and years lived with disability for 1990 by location for traumatic brain injury

**eTable 9.** Years lived with disability for 2019 and percentage changes of age-standardized rates by location for spinal cord injury, 1990–2019

**eTable 10.** Incidence, prevalence, and years lived with disability for 1990 by location for spinal cord injury

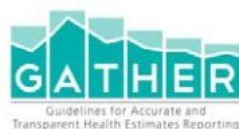

## Checklist of information that should be included in new reports of global health estimates

| Item #                                                                                                | Checklist item                                                                                                                                                                                                                                                                                                                                                                                | Reported on page #                                                                                                                                                                                                                 |
|-------------------------------------------------------------------------------------------------------|-----------------------------------------------------------------------------------------------------------------------------------------------------------------------------------------------------------------------------------------------------------------------------------------------------------------------------------------------------------------------------------------------|------------------------------------------------------------------------------------------------------------------------------------------------------------------------------------------------------------------------------------|
| <b>Objectives and funding</b>                                                                         |                                                                                                                                                                                                                                                                                                                                                                                               |                                                                                                                                                                                                                                    |
| 1                                                                                                     | Define the indicator(s), populations (including age, sex, and geographic entities), and time period(s) for which estimates were made.                                                                                                                                                                                                                                                         | Main Pg. 4-8                                                                                                                                                                                                                       |
| 2                                                                                                     | List the funding sources for the work.                                                                                                                                                                                                                                                                                                                                                        | Main Pg. 18                                                                                                                                                                                                                        |
| <b>Data Inputs</b>                                                                                    |                                                                                                                                                                                                                                                                                                                                                                                               |                                                                                                                                                                                                                                    |
| <i>For all data inputs from multiple sources that are synthesized as part of the study:</i>           |                                                                                                                                                                                                                                                                                                                                                                                               |                                                                                                                                                                                                                                    |
| 3                                                                                                     | Describe how the data were identified and how the data were accessed.                                                                                                                                                                                                                                                                                                                         | Main Pg. 4-8                                                                                                                                                                                                                       |
| 4                                                                                                     | Specify the inclusion and exclusion criteria. Identify all ad - hoc exclusions.                                                                                                                                                                                                                                                                                                               | Main Pg. 4-5<br><a href="https://ghdx.healthdata.org/gbd-2019/data-input-sources">https://ghdx.healthdata.org/gbd-2019/data-input-sources</a>                                                                                      |
| 5                                                                                                     | Provide information on all included data sources and their main characteristics. For each data source used, report reference information or contact name/institution, population represented, data collection method, year(s) of data collection, sex and age range, diagnostic criteria or measurement method, and sample size, as relevant.                                                 | Main Pg. 4-5<br><a href="https://ghdx.healthdata.org/gbd-2019/data-input-sources">https://ghdx.healthdata.org/gbd-2019/data-input-sources</a>                                                                                      |
| 6                                                                                                     | Identify and describe any categories of input data that have potentially important biases (e.g., based on characteristics listed in item 5).                                                                                                                                                                                                                                                  | <a href="https://ghdx.healthdata.org/gbd-2019/data-input-sources">https://ghdx.healthdata.org/gbd-2019/data-input-sources</a><br><a href="https://ghdx.healthdata.org/gbd-2019/code">https://ghdx.healthdata.org/gbd-2019/code</a> |
| <i>For data inputs that contribute to the analysis but were not synthesized as part of the study:</i> |                                                                                                                                                                                                                                                                                                                                                                                               |                                                                                                                                                                                                                                    |
| 7                                                                                                     | Describe and give sources for any other data inputs.                                                                                                                                                                                                                                                                                                                                          | N/A                                                                                                                                                                                                                                |
| <i>For all data inputs:</i>                                                                           |                                                                                                                                                                                                                                                                                                                                                                                               |                                                                                                                                                                                                                                    |
| 8                                                                                                     | Provide all data inputs in a file format from which data can be efficiently extracted (e.g., a spreadsheet rather than a PDF), including all relevant meta - data listed in item 5. For any data inputs that cannot be shared because of ethical or legal reasons, such as third - party ownership, provide a contact name or the name of the institution that retains the right to the data. | <a href="https://ghdx.healthdata.org/gbd-2019/data-input-sources">https://ghdx.healthdata.org/gbd-2019/data-input-sources</a>                                                                                                      |
| <b>Data analysis</b>                                                                                  |                                                                                                                                                                                                                                                                                                                                                                                               |                                                                                                                                                                                                                                    |
| 9                                                                                                     | Provide a conceptual overview of the data analysis method. A diagram may be helpful.                                                                                                                                                                                                                                                                                                          | Main Pg. 7-8                                                                                                                                                                                                                       |

|                               |                                                                                                                                                                                                                                                                           |                                                                                                                   |
|-------------------------------|---------------------------------------------------------------------------------------------------------------------------------------------------------------------------------------------------------------------------------------------------------------------------|-------------------------------------------------------------------------------------------------------------------|
| 10                            | Provide a detailed description of all steps of the analysis, including mathematical formulae. This description should cover, as relevant, data cleaning, data pre - processing, data adjustments and weighting of data sources, and mathematical or statistical model(s). | Main Pg. 7-8<br><a href="https://ghdx.healthdata.org/gbd-2019/code">https://ghdx.healthdata.org/gbd-2019/code</a> |
| 11                            | Describe how candidate models were evaluated and how the final model(s) were selected.                                                                                                                                                                                    | N/A                                                                                                               |
| 12                            | Provide the results of an evaluation of model performance, if done, as well as the results of any relevant sensitivity analysis.                                                                                                                                          | N/A                                                                                                               |
| 13                            | Describe methods for calculating uncertainty of the estimates. State which sources of uncertainty were, and were not, accounted for in the uncertainty analysis.                                                                                                          | Main Pg. 6                                                                                                        |
| 14                            | State how analytic or statistical source code used to generate estimates can be accessed.                                                                                                                                                                                 | <a href="https://ghdx.healthdata.org/gbd-2019/code">https://ghdx.healthdata.org/gbd-2019/code</a>                 |
| <b>Results and Discussion</b> |                                                                                                                                                                                                                                                                           |                                                                                                                   |
| 15                            | Provide published estimates in a file format from which data can be efficiently extracted.                                                                                                                                                                                | <a href="https://vizhub.healthdata.org/gbd-results/">https://vizhub.healthdata.org/gbd-results/</a>               |
| 16                            | Report a quantitative measure of the uncertainty of the estimates (e.g. uncertainty intervals).                                                                                                                                                                           | Main Pg. 8-12                                                                                                     |
| 17                            | Interpret results in light of existing evidence. If updating a previous set of estimates, describe the reasons for changes in estimates.                                                                                                                                  | Main Pg. 12-17                                                                                                    |
| 18                            | Discuss limitations of the estimates. Include a discussion of any modelling assumptions or data limitations that affect interpretation of the estimates.                                                                                                                  | Main Pg. 16-17                                                                                                    |

*This checklist should be used in conjunction with the GATHER statement and Explanation and Elaboration document, found on [gather-statement.org](http://gather-statement.org)*

**STROBE Statement—Checklist of items that should be included in reports of *cross-sectional studies***

|                           | <b>Item No</b> | <b>Recommendation</b>                                                                                                           | <b>Page No</b>                                                                                                                              |
|---------------------------|----------------|---------------------------------------------------------------------------------------------------------------------------------|---------------------------------------------------------------------------------------------------------------------------------------------|
| <b>Title and abstract</b> | 1              | (a) Indicate the study's design with a commonly used term in the title or the abstract                                          | Main Pg. 1-2                                                                                                                                |
|                           |                | (b) Provide in the abstract an informative and balanced summary of what was done and what was found                             | Main Pg. 1-2                                                                                                                                |
| <b>Introduction</b>       |                |                                                                                                                                 |                                                                                                                                             |
| Background/rationale      | 2              | Explain the scientific background and rationale for the investigation being reported                                            | Main Pg. 2-3                                                                                                                                |
| Objectives                | 3              | State specific objectives, including any prespecified hypotheses                                                                | Main Pg. 3                                                                                                                                  |
| <b>Methods</b>            |                |                                                                                                                                 |                                                                                                                                             |
| Study design              | 4              | Present key elements of study design early in the paper                                                                         | Main Pg. 4                                                                                                                                  |
| Setting                   | 5              | Describe the setting, locations, and relevant dates, including periods of recruitment, exposure, follow-up, and data collection | Main Pg. 5<br><a href="https://ghdx.healthdata.org/gbd-2019/data-input-sources">https://ghdx.healthdata.org/gbd-2019/data-input-sources</a> |
| Participants              | 6              | (a) Give the eligibility criteria, and the sources and methods of selection of participants                                     | Main Pg. 5<br><a href="https://ghdx.healthdata.org/gbd-2019/data-input-sources">https://ghdx.healthdata.org/gbd-2019/data-input-sources</a> |
| Variables                 | 7              | Clearly define all outcomes, exposures, predictors, potential confounders, and effect modifiers. Give diagnostic criteria, if   | Main Pg. 5-6<br><a href="https://vizhub.healthdata.org/gbd-results/">https://vizhub.healthdata.org/gbd-results/</a>                         |

|                              |     |                                                                                                                                                                                      |                                                                                                                                                                                                                                    |
|------------------------------|-----|--------------------------------------------------------------------------------------------------------------------------------------------------------------------------------------|------------------------------------------------------------------------------------------------------------------------------------------------------------------------------------------------------------------------------------|
|                              |     | applicable                                                                                                                                                                           |                                                                                                                                                                                                                                    |
| Data sources/<br>measurement | 8*  | For each variable of interest, give sources of data and details of methods of assessment (measurement). Describe comparability of assessment methods if there is more than one group | Main Pg. 5-6<br><a href="https://vizhub.healthdata.org/gbd-results/">https://vizhub.healthdata.org/gbd-results/</a>                                                                                                                |
| Bias                         | 9   | Describe any efforts to address potential sources of bias                                                                                                                            | <a href="https://ghdx.healthdata.org/gbd-2019/data-input-sources">https://ghdx.healthdata.org/gbd-2019/data-input-sources</a><br><a href="https://ghdx.healthdata.org/gbd-2019/code">https://ghdx.healthdata.org/gbd-2019/code</a> |
| Study size                   | 10  | Explain how the study size was arrived at                                                                                                                                            | N/A                                                                                                                                                                                                                                |
| Quantitative variables       | 11  | Explain how quantitative variables were handled in the analyses. If applicable, describe which groupings were chosen and why                                                         | Main Pg. 5-6<br><a href="https://ghdx.healthdata.org/gbd-2019/code">https://ghdx.healthdata.org/gbd-2019/code</a>                                                                                                                  |
| Statistical methods          | 12  | (a) Describe all statistical methods, including those used to control for confounding                                                                                                | Main Pg. 7-8<br><a href="https://ghdx.healthdata.org/gbd-2019/code">https://ghdx.healthdata.org/gbd-2019/code</a>                                                                                                                  |
|                              |     | (b) Describe any methods used to examine subgroups and interactions                                                                                                                  | N/A                                                                                                                                                                                                                                |
|                              |     | (c) Explain how missing data were addressed                                                                                                                                          | N/A                                                                                                                                                                                                                                |
|                              |     | (d) If applicable, describe analytical methods taking account of sampling strategy                                                                                                   | N/A                                                                                                                                                                                                                                |
|                              |     | (e) Describe any sensitivity analyses                                                                                                                                                | N/A                                                                                                                                                                                                                                |
| <b>Results</b>               |     |                                                                                                                                                                                      |                                                                                                                                                                                                                                    |
| Participants                 | 13* | (a) Report numbers of individuals at each stage of study—eg numbers potentially eligible,                                                                                            | <a href="https://ghdx.healthdata.org/gbd-2019/data-input-sources">https://ghdx.healthdata.org/gbd-2019/data-input-sources</a><br><a href="https://ghdx.healthdata.org/gbd-2019/code">https://ghdx.healthdata.org/gbd-2019/code</a> |



|                  |     |                                                                                                                                                                                                              |                                                                                                                                                                                                                                    |
|------------------|-----|--------------------------------------------------------------------------------------------------------------------------------------------------------------------------------------------------------------|------------------------------------------------------------------------------------------------------------------------------------------------------------------------------------------------------------------------------------|
|                  |     | examined for eligibility, confirmed eligible, included in the study, completing follow-up, and analysed                                                                                                      |                                                                                                                                                                                                                                    |
|                  |     | (b) Give reasons for non-participation at each stage                                                                                                                                                         | <a href="https://ghdx.healthdata.org/gbd-2019/data-input-sources">https://ghdx.healthdata.org/gbd-2019/data-input-sources</a><br><a href="https://ghdx.healthdata.org/gbd-2019/code">https://ghdx.healthdata.org/gbd-2019/code</a> |
|                  |     | (c) Consider use of a flow diagram                                                                                                                                                                           | <a href="https://ghdx.healthdata.org/gbd-2019/data-input-sources">https://ghdx.healthdata.org/gbd-2019/data-input-sources</a><br><a href="https://ghdx.healthdata.org/gbd-2019/code">https://ghdx.healthdata.org/gbd-2019/code</a> |
| Descriptive data | 14* | (a) Give characteristics of study participants (eg demographic, clinical, social) and information on exposures and potential confounders                                                                     | Main Pg. 8-12                                                                                                                                                                                                                      |
|                  |     | (b) Indicate number of participants with missing data for each variable of interest                                                                                                                          | N/A                                                                                                                                                                                                                                |
| Outcome data     | 15* | Report numbers of outcome events or summary measures                                                                                                                                                         | Main Pg. 8-12                                                                                                                                                                                                                      |
| Main results     | 16  | (a) Give unadjusted estimates and, if applicable, confounder-adjusted estimates and their precision (eg, 95% confidence interval). Make clear which confounders were adjusted for and why they were included | Main Pg. 8-12                                                                                                                                                                                                                      |
|                  |     | (b) Report category boundaries when continuous variables were categorized                                                                                                                                    | N/A                                                                                                                                                                                                                                |
|                  |     | (c) If relevant, consider translating estimates of relative risk into absolute                                                                                                                               | N/A                                                                                                                                                                                                                                |

|                          |    |                                                                                                                                                                            |                |
|--------------------------|----|----------------------------------------------------------------------------------------------------------------------------------------------------------------------------|----------------|
|                          |    | risk for a meaningful time period                                                                                                                                          |                |
| Other analyses           | 17 | Report other analyses done—eg analyses of subgroups and interactions, and sensitivity analyses                                                                             | N/A            |
| <b>Discussion</b>        |    |                                                                                                                                                                            |                |
| Key results              | 18 | Summarise key results with reference to study objectives                                                                                                                   | Main Pg. 12-16 |
| Limitations              | 19 | Discuss limitations of the study, taking into account sources of potential bias or imprecision. Discuss both direction and magnitude of any potential bias                 | Main Pg. 16-17 |
| Interpretation           | 20 | Give a cautious overall interpretation of results considering objectives, limitations, multiplicity of analyses, results from similar studies, and other relevant evidence | Main Pg. 17    |
| Generalisability         | 21 | Discuss the generalisability (external validity) of the study results                                                                                                      | Main Pg. 17    |
| <b>Other information</b> |    |                                                                                                                                                                            |                |
| Funding                  | 22 | Give the source of funding and the role of the funders for the present study and, if applicable, for the original study on which the present article is based              | Main Pg. 18    |

\*Give information separately for exposed and unexposed groups.

1  
2  
3 **Note:** An Explanation and Elaboration article discusses each checklist item and gives  
4 methodological background and published examples of transparent reporting. The STROBE  
5 checklist is best used in conjunction with this article (freely available on the Web sites of PLoS  
6 Medicine at <http://www.plosmedicine.org/>, Annals of Internal Medicine at  
7 <http://www.annals.org/>, and Epidemiology at <http://www.epidem.com/>). Information on the  
8 STROBE Initiative is available at [www.strobe-statement.org](http://www.strobe-statement.org).  
9  
10  
11  
12  
13  
14  
15  
16  
17  
18  
19  
20  
21  
22  
23  
24  
25  
26  
27  
28  
29  
30  
31  
32  
33  
34  
35  
36  
37  
38  
39  
40  
41  
42  
43  
44  
45  
46  
47  
48  
49  
50  
51  
52  
53  
54  
55  
56  
57  
58  
59  
60

For peer review only

eFigure 1. Incidence of traumatic brain injury worldwide

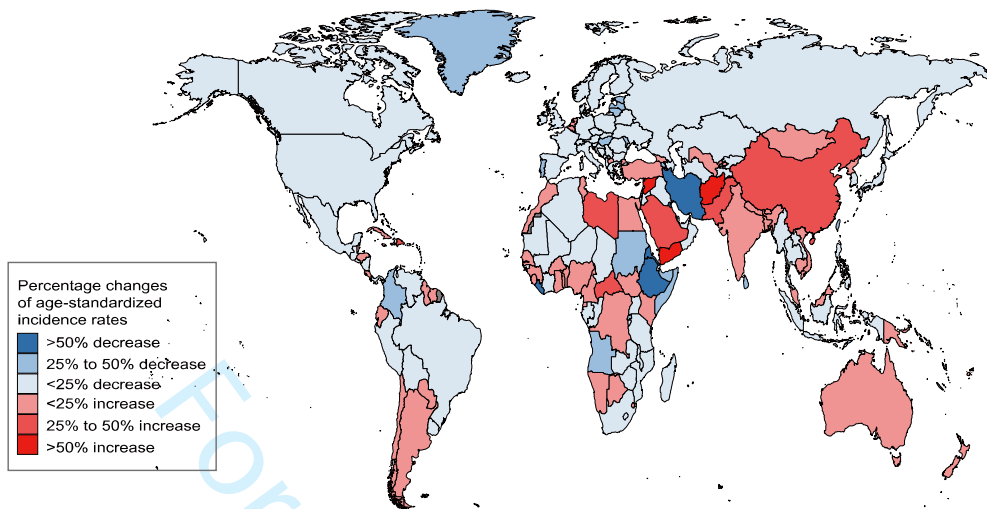

Percentage changes of age-standardized incidence rates of traumatic brain injury, 1990–2019

## eFigure 2. Prevalence of traumatic brain injury worldwide

A

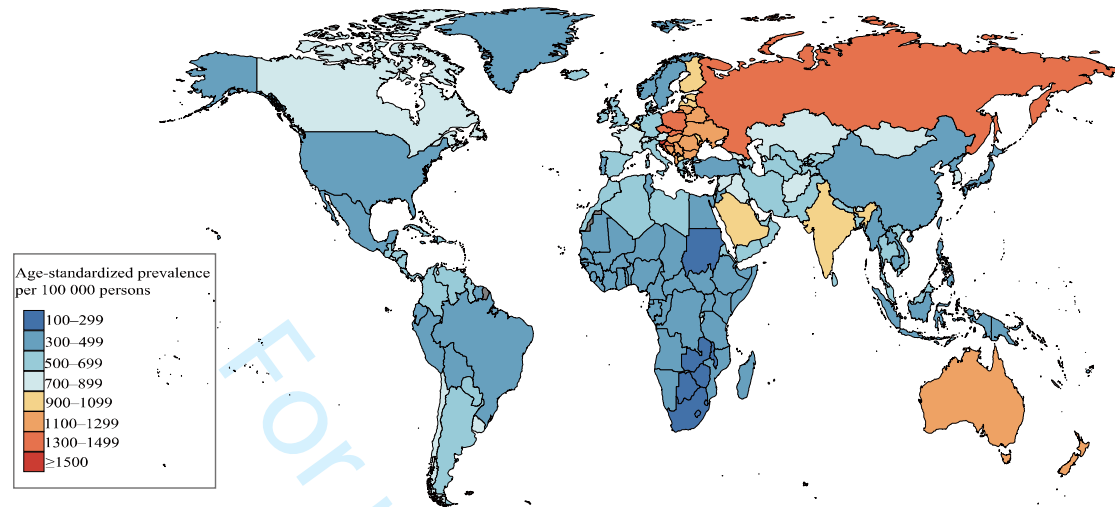

B

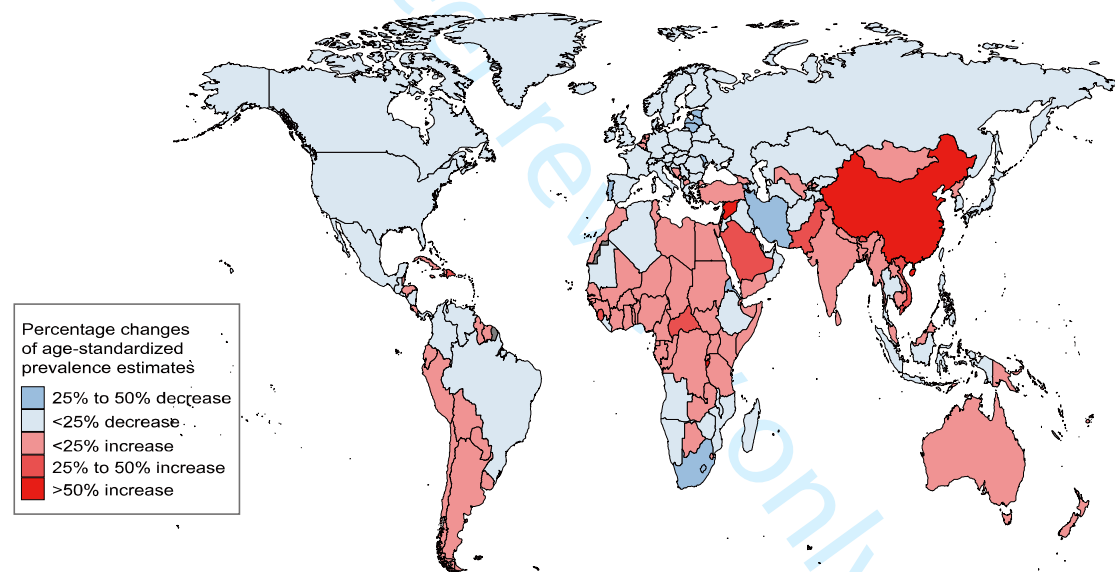

Age-standardized prevalence estimates per 100,000 persons of traumatic brain injury (TBI) by location, 2019 (A);

Percentage changes of age-standardized prevalence estimates of TBI, 1990–2019 (B)

**eFigure 3. Years lived with disability of traumatic brain injury worldwide**

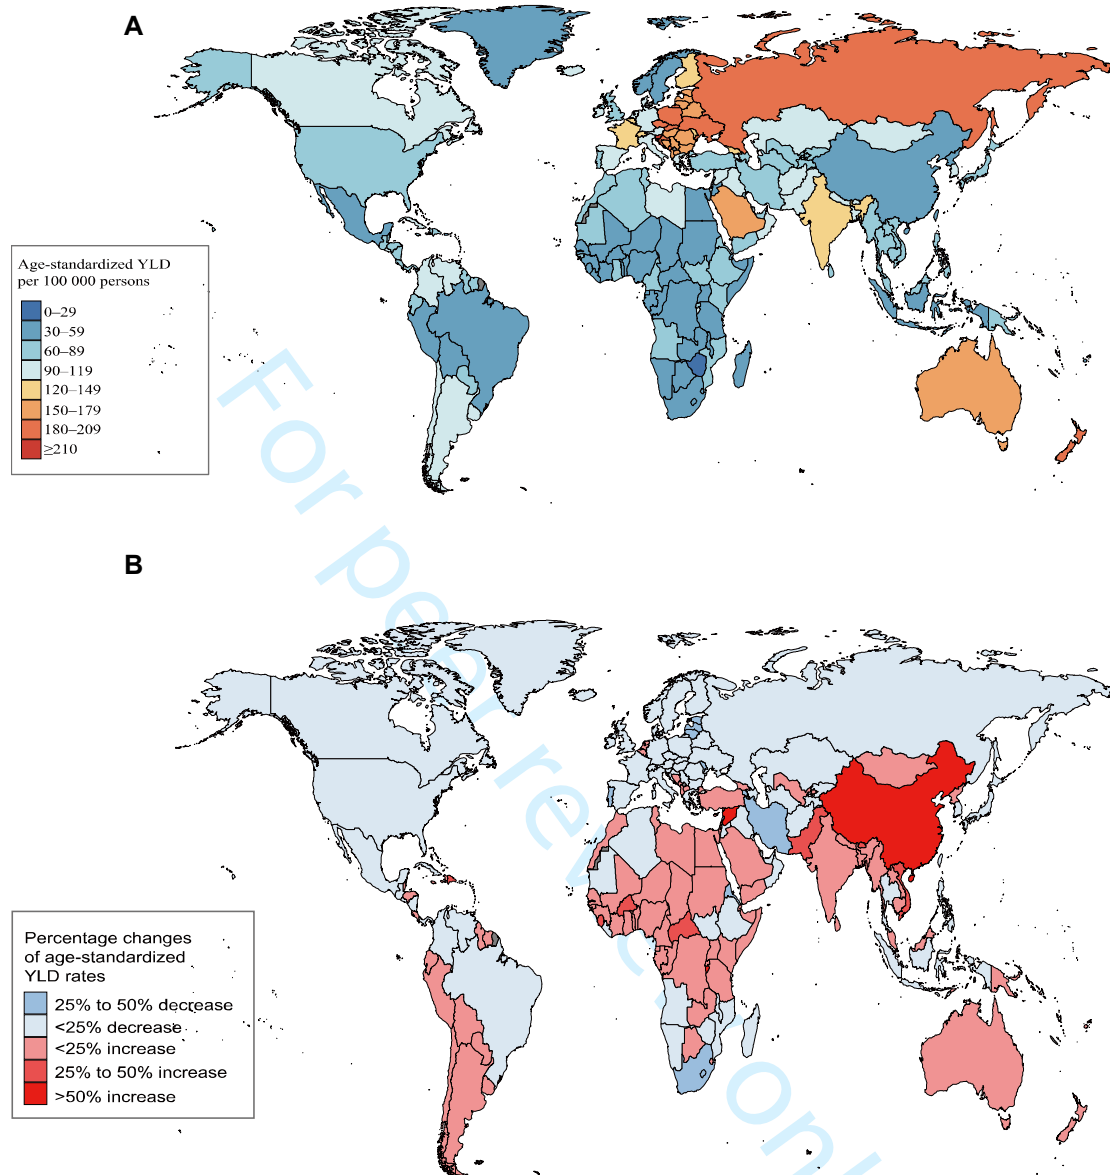

Age-standardized years lived with disability (YLDs) rates per 100,000 persons of traumatic brain injury (TBI) by location, 2019 (A); Percentage changes of age-standardized YLD rates of TBI, 1990–2019 (B)

eFigure 4. Incidence of spinal cord injury worldwide

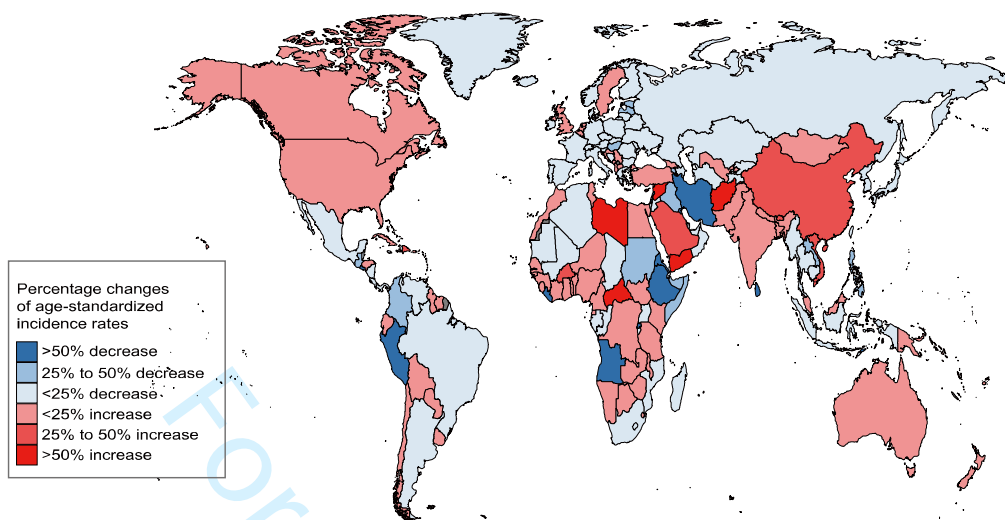

Percentage changes of age-standardized incidence rates of spinal cord injury, 1990–2019

eFigure 5. Prevalence of spinal cord injury worldwide

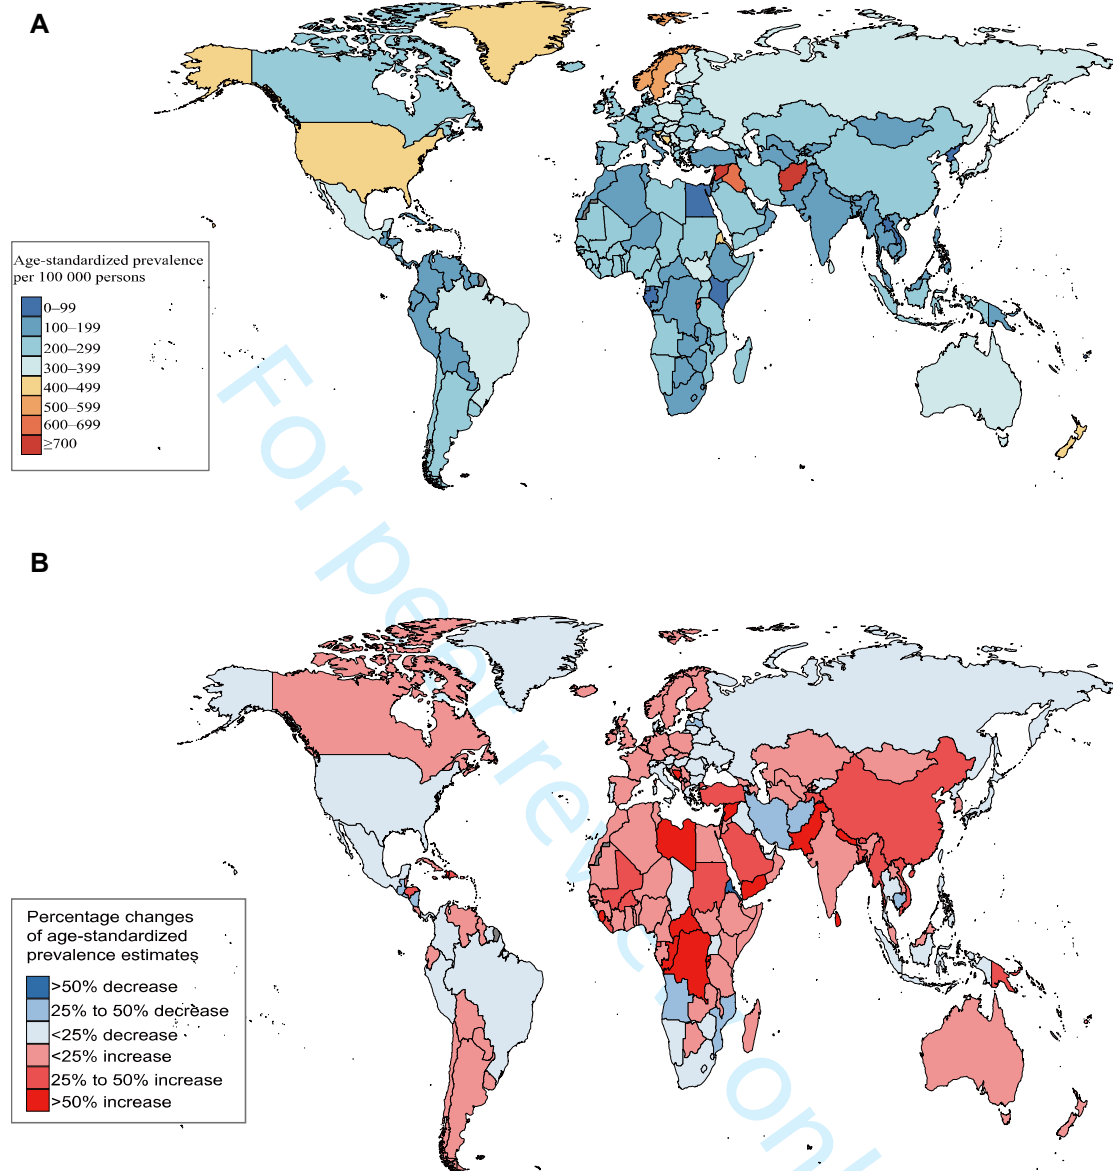

Age-standardized prevalence estimates per 100,000 persons of spinal cord injury (SCI) by location, 2019 (A);

Percentage changes of age-standardized prevalence estimates of SCI, 1990–2019 (B)



eFigure 6. Years lived with disability of spinal cord injury world

A

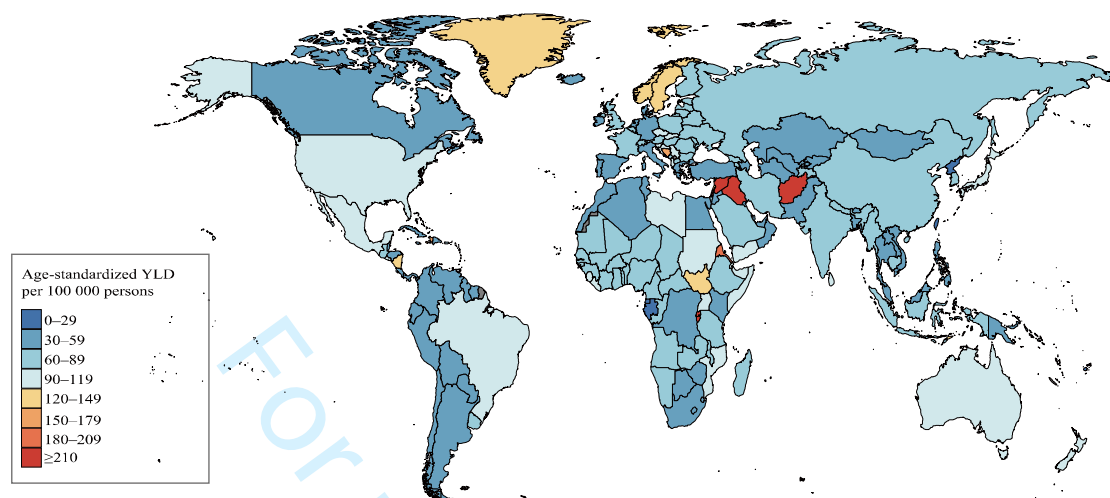

B

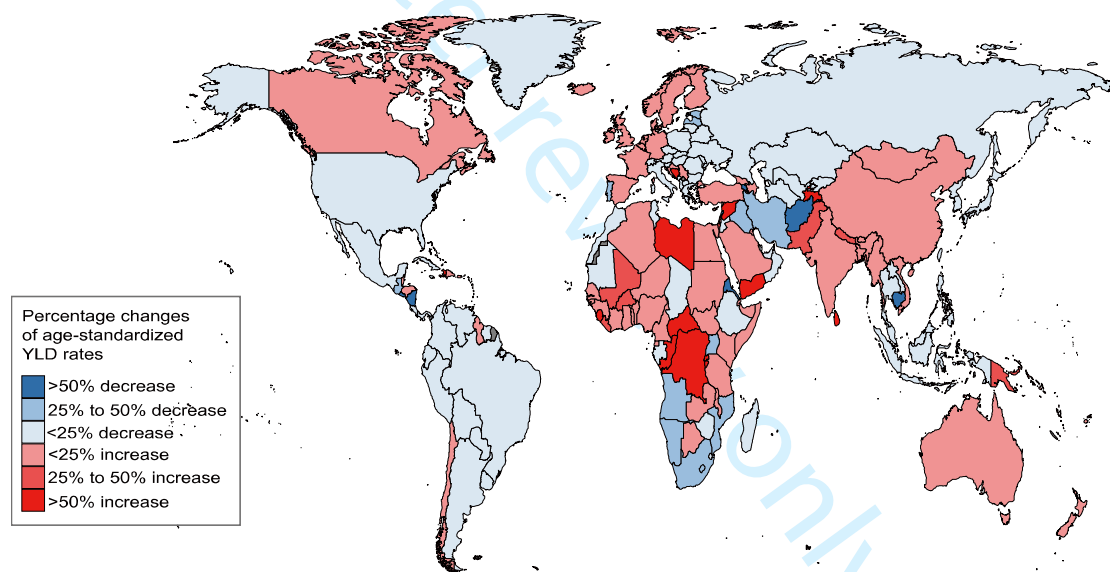

Age-standardized years lived with disability (YLDs) rates per 100,000 persons of spinal cord injury (SCI) by location, 2019 (A); Percentage changes of age-standardized YLD rates of SCI, 1990–2019 (B)

**eFigure 7. Associations between Socio-demographic Index (SDI) and age-standardized years lived with disability (YLDs) rates of traumatic brain injury and spinal cord injury in 204 countries and territories**

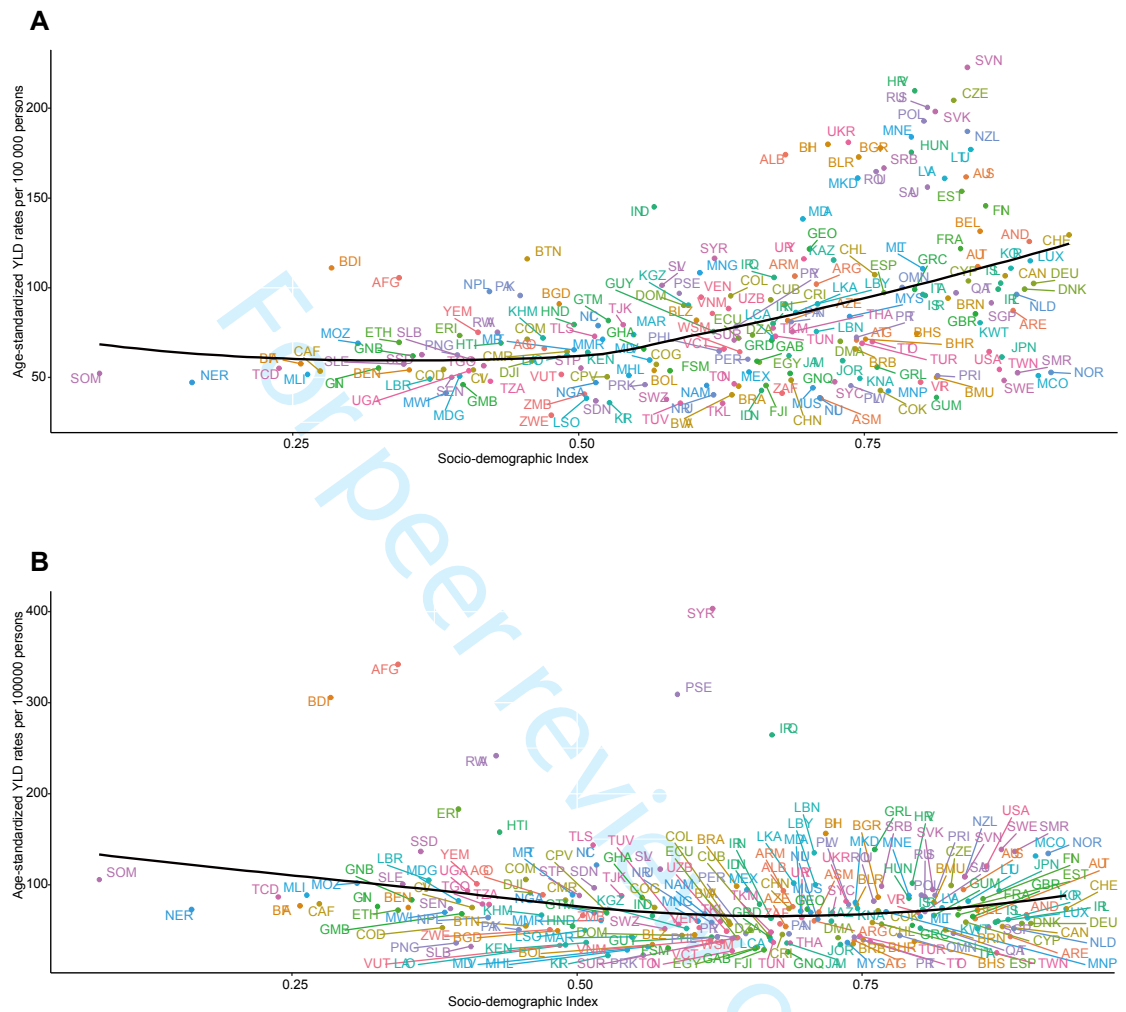

Associations between Socio-demographic Index (SDI) and age-standardized years lived with disability (YLDs) rates of traumatic brain injury (A) and spinal cord injury (B) in 204 countries and territories, 2019; each point is plotted for each country/territory and shows observed age-standardized YLD rates for that country/territory in 2019; expected values based on SDI and disease rates in all countries and territories are shown as the black line; the name of each country/territory is represented by its ISO3 codes; ISO3 codes of 204 countries and territories are presented in **eTable 6**

**6**

**eTable 1. Global Burden of Disease severity hierarchy for nature-of-injury**

| Rank | Inpatient hierarchy                                                                                                                         | Outpatient hierarchy                                                    |
|------|---------------------------------------------------------------------------------------------------------------------------------------------|-------------------------------------------------------------------------|
| 1    | Spinal cord lesion below neck level                                                                                                         | Fracture of pelvis                                                      |
| 2    | Amputation of lower limbs, bilateral                                                                                                        | Fracture of patella, tibia or fibula, or ankle                          |
| 3    | Amputation of upper limbs, bilateral                                                                                                        | Fracture of hip                                                         |
| 4    | Spinal cord lesion at neck level                                                                                                            | Fracture of skull                                                       |
| 5    | Fracture of hip                                                                                                                             | Amputation of thumb                                                     |
| 6    | Fracture of femur, other than femoral neck                                                                                                  | Fracture of vertebral column                                            |
| 7    | Amputation of upper limb, unilateral                                                                                                        | Multiple fractures, dislocations, crashes, wounds, sprains, and strains |
| 8    | Amputation of lower limb, unilateral                                                                                                        | Internal hemorrhage in abdomen and pelvis                               |
| 9    | Multiple fractures, dislocations, crashes, wounds, sprains, and strains                                                                     | Fracture of femur, other than femoral neck                              |
| 10   | Effect of different environmental factors                                                                                                   | Dislocation of hip                                                      |
| 11   | Fracture of patella, tibia or fibula, or ankle                                                                                              | Amputation of toe/toes                                                  |
| 12   | Moderate-Severe traumatic brain injury                                                                                                      | Fracture of hand (wrist and other distal part of hand)                  |
| 13   | Fracture of foot bones except ankle                                                                                                         | Amputation of fingers (excluding thumb)                                 |
| 14   | Internal hemorrhage in abdomen and pelvis                                                                                                   | Burns, <20% of total burned surface area without lower airway burns     |
| 15   | Crush injury                                                                                                                                | Dislocation of knee                                                     |
| 16   | Minor traumatic brain injury                                                                                                                | Contusion in any part of the body                                       |
| 17   | Fracture of pelvis                                                                                                                          | Minor traumatic brain injury                                            |
| 18   | Nerve injury                                                                                                                                | Foreign body in respiratory system                                      |
| 19   | Severe chest injury                                                                                                                         | Severe chest injury                                                     |
| 20   | Dislocation of hip                                                                                                                          | Drowning and nonfatal submersion                                        |
| 21   | Burns, $\geq 20\%$ total burned surface area or $\geq 10\%$ burned surface area if head/neck or hands/wrist involved w/o lower airway burns | Asphyxiation                                                            |
| 22   | Lower airway burns                                                                                                                          | Poisoning requiring urgent care                                         |
| 23   | Fracture of skull                                                                                                                           | Effect of different environmental factors                               |
| 24   | Amputation of thumb                                                                                                                         | Foreign body in GI and urogenital system                                |
| 25   | Fracture of hand (wrist and other distal part of hand)                                                                                      | Fracture of sternum and/or fracture of one or more ribs                 |
| 26   | Fracture of vertebral column                                                                                                                | Nerve injury                                                            |
| 27   | Contusion in any part of the body                                                                                                           | Fracture of face bones                                                  |
| 28   | Open wound(s)                                                                                                                               | Dislocation of shoulder                                                 |

| Rank | Inpatient hierarchy                                                           | Outpatient hierarchy                                                          |
|------|-------------------------------------------------------------------------------|-------------------------------------------------------------------------------|
| 29   | Amputation of toe/toes                                                        | Injury to eyes                                                                |
| 30   | Dislocation of knee                                                           | Fracture of clavicle, scapula, or humerus                                     |
| 31   | Amputation of fingers (excluding thumb)                                       | Fracture of radius and/or ulna                                                |
| 32   | Drowning and nonfatal submersion                                              | Fracture of foot bones except ankle                                           |
| 33   | Asphyxiation                                                                  | Foreign body in ear                                                           |
| 34   | Burns, <20% total burned surface area without lower airway burns              | Muscle and tendon injuries, including sprains and strains lesser dislocations |
| 35   | Muscle and tendon injuries, including sprains and strains lesser dislocations | Superficial injury of any part of the body                                    |
| 36   | Fracture of face bones                                                        | Open wound(s)                                                                 |
| 37   | Foreign body in respiratory system                                            | Complications following therapeutic procedures                                |
| 38   | Poisoning requiring urgent care                                               |                                                                               |
| 39   | Foreign body in GI and urogenital system                                      |                                                                               |
| 40   | Fracture of sternum and/or fracture of one or more ribs                       |                                                                               |
| 41   | Dislocation of shoulder                                                       |                                                                               |
| 42   | Injury to eyes                                                                |                                                                               |
| 43   | Fracture of clavicle, scapula, or humerus                                     |                                                                               |
| 44   | Fracture of radius and/or ulna                                                |                                                                               |
| 45   | Foreign body in ear                                                           |                                                                               |
| 46   | Superficial injury of any part of the body                                    |                                                                               |
| 47   | Complications following therapeutic procedures                                |                                                                               |

**eTable 2. Global Burden of Disease lay descriptions and disability weights for health states**

| Health state                                                                        | Lay description                                                                                                                                                                                                                              | Disability weight      |
|-------------------------------------------------------------------------------------|----------------------------------------------------------------------------------------------------------------------------------------------------------------------------------------------------------------------------------------------|------------------------|
| Concussion                                                                          | has headaches, dizziness, nausea and difficulty concentrating.                                                                                                                                                                               | 0.110<br>(0.074–0.158) |
| Severe traumatic brain injury: short term, with or without treatment                | cannot concentrate and has headaches, memory problems, dizziness, and feels angry.                                                                                                                                                           | 0.214<br>(0.141–0.297) |
| Traumatic brain injury: long-term consequences, minor, with or without treatment    | has episodes of headaches, memory problems, and difficulty concentrating.                                                                                                                                                                    | 0.094<br>(0.063–0.133) |
| Traumatic brain injury: long-term consequences, moderate, with or without treatment | has frequent headaches, memory problems, difficulty concentrating, and dizziness. The person is often anxious and moody.                                                                                                                     | 0.231<br>(0.156–0.324) |
| Traumatic brain injury: long-term consequences, severe, with or without treatment   | cannot think clearly and has frequent headaches, memory problems, difficulty concentrating and dizziness. The person is often anxious and moody, and depends on others for feeding, toileting, dressing and walking.                         | 0.637<br>(0.462–0.789) |
| Spinal cord lesion below neck: treated                                              | is paralyzed from the waist down, cannot feel or move the legs and has difficulties with urine and bowel control. The person uses a wheelchair to move around.                                                                               | 0.296<br>(0.198–0.414) |
| Spinal cord lesion below neck: untreated                                            | is paralyzed from the waist down, cannot feel or move the legs and has difficulties with urine and bowel control. Legs are in fixed, bent positions, and the person gets frequent infections and pressure sores.                             | 0.623<br>(0.434–0.777) |
| Spinal cord lesion at neck: treated                                                 | is paralyzed from the neck down, with no feeling or control over any part of the body below the neck, and no urine or bowel control.                                                                                                         | 0.589<br>(0.415–0.748) |
| Spinal cord lesion at neck: untreated                                               | is paralyzed from the neck down, with no feeling or control over any part of the body below the neck, and no urine or bowel control. Arms and legs are in fixed, bent positions, and the person gets frequent infections and pressure sores. | 0.732<br>(0.544–0.871) |

**eTable 3. Global Burden of Disease (GBD) location hierarchy: 7 GBD super regions, 21 GBD regions, and 204 countries and territories**

| GBD hierarchy    | Location                  |
|------------------|---------------------------|
| GBD super region | High-income               |
| GBD region       | High-income North America |
|                  | Canada                    |
|                  | Greenland                 |
|                  | United States of America  |
| GBD region       | Australasia               |
|                  | Australia                 |
|                  | New Zealand               |
| GBD region       | High-income Asia Pacific  |
|                  | Brunei Darussalam         |
|                  | Japan                     |
|                  | Republic of Korea         |
|                  | Singapore                 |
| GBD region       | Western Europe            |
|                  | Andorra                   |
|                  | Austria                   |
|                  | Belgium                   |
|                  | Cyprus                    |
|                  | Denmark                   |
|                  | Finland                   |
|                  | France                    |
|                  | Germany                   |
|                  | Greece                    |
|                  | Iceland                   |
|                  | Ireland                   |
|                  | Israel                    |
|                  | Italy                     |
|                  | Luxembourg                |
|                  | Malta                     |
|                  | Monaco                    |
|                  | Netherlands               |
|                  | Norway                    |
|                  | Portugal                  |
|                  | San Marino                |
|                  | Spain                     |
|                  | Sweden                    |
|                  | Switzerland               |
|                  | United Kingdom            |
| GBD region       | Southern Latin America    |

| <b>GBD hierarchy</b> | <b>Location</b>                                  |
|----------------------|--------------------------------------------------|
|                      | Argentina                                        |
|                      | Chile                                            |
|                      | Uruguay                                          |
| GBD super region     | Central Europe, Eastern Europe, and Central Asia |
| GBD region           | Eastern Europe                                   |
|                      | Belarus                                          |
|                      | Estonia                                          |
|                      | Latvia                                           |
|                      | Lithuania                                        |
|                      | Republic of Moldova                              |
|                      | Russian Federation                               |
|                      | Ukraine                                          |
| GBD region           | Central Europe                                   |
|                      | Albania                                          |
|                      | Bosnia and Herzegovina                           |
|                      | Bulgaria                                         |
|                      | Croatia                                          |
|                      | Czechia                                          |
|                      | Hungary                                          |
|                      | Montenegro                                       |
|                      | North Macedonia                                  |
|                      | Poland                                           |
|                      | Romania                                          |
|                      | Serbia                                           |
|                      | Slovakia                                         |
|                      | Slovenia                                         |
| GBD region           | Central Asia                                     |
|                      | Armenia                                          |
|                      | Azerbaijan                                       |
|                      | Georgia                                          |
|                      | Kazakhstan                                       |
|                      | Kyrgyzstan                                       |
|                      | Mongolia                                         |
|                      | Tajikistan                                       |
|                      | Turkmenistan                                     |
|                      | Uzbekistan                                       |
| GBD super region     | Latin America and Caribbean                      |
| GBD region           | Central Latin America                            |
|                      | Colombia                                         |
|                      | Costa Rica                                       |

| <b>GBD hierarchy</b> | <b>Location</b>                        |
|----------------------|----------------------------------------|
|                      | El Salvador                            |
|                      | Guatemala                              |
|                      | Honduras                               |
|                      | Mexico                                 |
|                      | Nicaragua                              |
|                      | Panama                                 |
|                      | Venezuela (Bolivarian Republic of)     |
| GBD region           | Andean Latin America                   |
|                      | Bolivia (Plurinational State of)       |
|                      | Ecuador                                |
|                      | Peru                                   |
| GBD region           | Caribbean                              |
|                      | Antigua and Barbuda                    |
|                      | Bahamas                                |
|                      | Barbados                               |
|                      | Belize                                 |
|                      | Bermuda                                |
|                      | Cuba                                   |
|                      | Dominica                               |
|                      | Dominican Republic                     |
|                      | Grenada                                |
|                      | Guyana                                 |
|                      | Haiti                                  |
|                      | Jamaica                                |
|                      | Puerto Rico                            |
|                      | Saint Lucia                            |
|                      | Saint Kitts and Nevis                  |
|                      | Saint Vincent and the Grenadines       |
|                      | Suriname                               |
|                      | Trinidad and Tobago                    |
|                      | United States Virgin Islands           |
| GBD region           | Tropical Latin America                 |
|                      | Brazil                                 |
|                      | Paraguay                               |
| GBD super region     | Southeast Asia, East Asia, and Oceania |
| GBD region           | East Asia                              |
|                      | China                                  |
|                      | Democratic People's Republic of Korea  |
|                      | Taiwan (Province of China)             |
| GBD region           | Southeast Asia                         |
|                      | Cambodia                               |



| GBD hierarchy    | Location                         |
|------------------|----------------------------------|
|                  | Indonesia                        |
|                  | Lao People's Democratic Republic |
|                  | Malaysia                         |
|                  | Maldives                         |
|                  | Mauritius                        |
|                  | Myanmar                          |
|                  | Philippines                      |
|                  | Seychelles                       |
|                  | Sri Lanka                        |
|                  | Thailand                         |
|                  | Timor-Leste                      |
|                  | Viet Nam                         |
| GBD region       | Oceania                          |
|                  | American Samoa                   |
|                  | Cook Islands                     |
|                  | Fiji                             |
|                  | Guam                             |
|                  | Kiribati                         |
|                  | Marshall Islands                 |
|                  | Micronesia (Federated States of) |
|                  | Nauru                            |
|                  | Niue                             |
|                  | Northern Mariana Islands         |
|                  | Palau                            |
|                  | Papua New Guinea                 |
|                  | Samoa                            |
|                  | Solomon Islands                  |
|                  | Tokelau                          |
|                  | Tonga                            |
|                  | Vanuatu                          |
|                  | Tuvalu                           |
| GBD super region | North Africa and Middle East     |
| GBD region       | North Africa and Middle East     |
|                  | Afghanistan                      |
|                  | Algeria                          |
|                  | Bahrain                          |
|                  | Egypt                            |
|                  | Iran (Islamic Republic of)       |
|                  | Iraq                             |
|                  | Jordan                           |
|                  | Kuwait                           |

| <b>GBD hierarchy</b> | <b>Location</b>             |
|----------------------|-----------------------------|
|                      | Lebanon                     |
|                      | Libya                       |
|                      | Morocco                     |
|                      | Oman                        |
|                      | Palestine                   |
|                      | Qatar                       |
|                      | Saudi Arabia                |
|                      | Sudan                       |
|                      | Syrian Arab Republic        |
|                      | Tunisia                     |
|                      | Turkey                      |
|                      | United Arab Emirates        |
|                      | Yemen                       |
| GBD super region     | South Asia                  |
| GBD region           | South Asia                  |
|                      | Bangladesh                  |
|                      | Bhutan                      |
|                      | India                       |
|                      | Nepal                       |
|                      | Pakistan                    |
| GBD super region     | Sub-Saharan Africa          |
| GBD region           | Southern Sub-Saharan Africa |
|                      | Botswana                    |
|                      | Eswatini                    |
|                      | Lesotho                     |
|                      | Namibia                     |
|                      | South Africa                |
|                      | Zimbabwe                    |
| GBD region           | Western Sub-Saharan Africa  |
|                      | Benin                       |
|                      | Burkina Faso                |
|                      | Cape Verde                  |
|                      | Cameroon                    |
|                      | Chad                        |
|                      | Côte d'Ivoire               |
|                      | Gambia                      |
|                      | Ghana                       |
|                      | Guinea                      |
|                      | Guinea-Bissau               |
|                      | Liberia                     |
|                      | Mali                        |

| GBD hierarchy | Location                         |
|---------------|----------------------------------|
|               | Mauritania                       |
|               | Niger                            |
|               | Nigeria                          |
|               | Sao Tome and Principe            |
|               | Senegal                          |
|               | Sierra Leone                     |
|               | Togo                             |
| GBD region    | Eastern Sub-Saharan Africa       |
|               | Burundi                          |
|               | Comoros                          |
|               | Djibouti                         |
|               | Eritrea                          |
|               | Ethiopia                         |
|               | Kenya                            |
|               | Madagascar                       |
|               | Malawi                           |
|               | Mozambique                       |
|               | Rwanda                           |
|               | Somalia                          |
|               | South Sudan                      |
|               | Uganda                           |
|               | United Republic of Tanzania      |
|               | Zambia                           |
| GBD region    | Central Sub-Saharan Africa       |
|               | Angola                           |
|               | Central African Republic         |
|               | Congo                            |
|               | Democratic Republic of the Congo |
|               | Equatorial Guinea                |
|               | Gabon                            |

**eTable 4. Global Burden of Disease world population standard**

| Age group      | Percent of population | Rounded |
|----------------|-----------------------|---------|
| Early neonatal | 0.039706188           | 0.04    |
| Late neonatal  | 0.118021789           | 0.12    |
| Post neonatal  | 1.868264909           | 1.87    |
| <1             | 2.025992886           | 2.03    |
| 1 to 4         | 7.909875913           | 7.91    |
| 5 to 9         | 9.568418272           | 9.57    |
| 10 to 14       | 8.990277942           | 8.99    |
| 15 to 19       | 8.324362192           | 8.32    |
| 20 to 24       | 7.866450176           | 7.87    |
| 25 to 29       | 7.632917343           | 7.63    |
| 30 to 34       | 7.331511124           | 7.33    |
| 35 to 39       | 6.811055              | 6.81    |
| 40 to 44       | 6.136798184           | 6.14    |
| 45 to 49       | 5.509495973           | 5.51    |
| 50 to 54       | 4.921822565           | 4.92    |
| 55 to 59       | 4.345633072           | 4.35    |
| 60 to 64       | 3.684473754           | 3.68    |
| 65 to 69       | 2.991239718           | 2.99    |
| 70 to 74       | 2.272487547           | 2.27    |
| 75 to 79       | 1.607371655           | 1.61    |
| 80 to 84       | 1.113034599           | 1.11    |
| 85 to 89       | 0.61707008            | 0.62    |
| 90 to 94       | 0.255008068           | 0.26    |
| 95 plus        | 0.084703935           | 0.08    |

**eTable 5. Global Burden of Disease (GBD) cause hierarchy with levels for injuries**

| Cause                                                  | Level    |
|--------------------------------------------------------|----------|
| Injuries                                               | 1        |
| Transport injuries                                     | 2        |
| Road injuries                                          | 3        |
| <b>Pedestrian road injuries</b>                        | <b>4</b> |
| <b>Cyclist road injuries</b>                           | <b>4</b> |
| <b>Motorcyclist road injuries</b>                      | <b>4</b> |
| <b>Motor vehicle road injuries</b>                     | <b>4</b> |
| <b>Other road injuries</b>                             | <b>4</b> |
| <b>Other transport injuries</b>                        | <b>3</b> |
| Unintentional injuries                                 | 2        |
| <b>Falls</b>                                           | <b>3</b> |
| <b>Drowning</b>                                        | <b>3</b> |
| <b>Fire, heat, and hot substances</b>                  | <b>3</b> |
| Poisonings                                             | 3        |
| <b>Poisoning by carbon monoxide</b>                    | <b>4</b> |
| <b>Poisoning by other means</b>                        | <b>4</b> |
| Exposure to mechanical forces                          | 3        |
| <b>Unintentional firearm injuries</b>                  | <b>4</b> |
| <b>Other exposure to mechanical forces</b>             | <b>4</b> |
| <b>Adverse effects of medical treatment</b>            | <b>3</b> |
| Animal contact                                         | 3        |
| <b>Venomous animal contact</b>                         | <b>4</b> |
| <b>Non-venomous animal contact</b>                     | <b>4</b> |
| Foreign body                                           | 3        |
| <b>Pulmonary aspiration and foreign body in airway</b> | <b>4</b> |
| <b>Foreign body in eyes</b>                            | <b>4</b> |
| <b>Foreign body in other body part</b>                 | <b>4</b> |
| <b>Environmental heat and cold exposure</b>            | <b>3</b> |
| <b>Exposure to forces of nature</b>                    | <b>3</b> |
| <b>Other unintentional injuries</b>                    | <b>3</b> |
| Self-harm and interpersonal violence                   | 2        |
| Self-harm                                              | 3        |
| <b>Self-harm by firearm</b>                            | <b>4</b> |
| <b>Self-harm by other specified means</b>              | <b>4</b> |
| Interpersonal violence                                 | 3        |
| <b>Physical violence by firearm</b>                    | <b>4</b> |
| <b>Physical violence by sharp object</b>               | <b>4</b> |
| <b>Physical violence by other means</b>                | <b>4</b> |
| <b>Conflict and terrorism</b>                          | <b>3</b> |
| <b>Executions and police conflict</b>                  | <b>3</b> |

The 29 causes in **bold** (they were called the most detailed causes in the GBD 2019 study) were analyzed in our study, which was consistent with the statistical analysis in the previous GBD 2016 study published in The Lancet Neurology.

**eTable 6. Global Burden of Disease locational ISO3 code and Socio-demographic Index (SDI), 2019**

| Location                         | ISO3 code | SDI   |
|----------------------------------|-----------|-------|
| Afghanistan                      | AFG       | 0.343 |
| Albania                          | ALB       | 0.681 |
| Algeria                          | DZA       | 0.652 |
| American Samoa                   | ASM       | 0.712 |
| Andorra                          | AND       | 0.894 |
| Angola                           | AGO       | 0.47  |
| Antigua and Barbuda              | ATG       | 0.743 |
| Argentina                        | ARG       | 0.708 |
| Armenia                          | ARM       | 0.689 |
| Australia                        | AUS       | 0.839 |
| Austria                          | AUT       | 0.849 |
| Azerbaijan                       | AZE       | 0.683 |
| Bahamas                          | BHS       | 0.796 |
| Bahrain                          | BHR       | 0.751 |
| Bangladesh                       | BGD       | 0.483 |
| Barbados                         | BRB       | 0.742 |
| Belarus                          | BLR       | 0.745 |
| Belgium                          | BEL       | 0.851 |
| Belize                           | BLZ       | 0.603 |
| Benin                            | BEN       | 0.352 |
| Bermuda                          | BMU       | 0.813 |
| Bhutan                           | BTN       | 0.455 |
| Bolivia (Plurinational State of) | BOL       | 0.566 |
| Bosnia and Herzegovina           | BIH       | 0.718 |
| Botswana                         | BWA       | 0.634 |
| Brazil                           | BRA       | 0.64  |
| Brunei Darussalam                | BRN       | 0.823 |
| Bulgaria                         | BGR       | 0.764 |
| Burkina Faso                     | BFA       | 0.257 |
| Burundi                          | BDI       | 0.284 |
| Cabo Verde                       | CPV       | 0.525 |
| Cambodia                         | KHM       | 0.469 |
| Cameroon                         | CMR       | 0.49  |
| Canada                           | CAN       | 0.873 |
| Central African Republic         | CAF       | 0.274 |
| Chad                             | TCD       | 0.238 |
| Chile                            | CHL       | 0.759 |
| China                            | CHN       | 0.686 |
| Colombia                         | COL       | 0.633 |

| Location                              | ISO3 code | SDI   |
|---------------------------------------|-----------|-------|
| Comoros                               | COM       | 0.455 |
| Congo                                 | COG       | 0.568 |
| Cook Islands                          | COK       | 0.764 |
| Costa Rica                            | CRI       | 0.68  |
| Croatia                               | HRV       | 0.794 |
| Cuba                                  | CUB       | 0.668 |
| Cyprus                                | CYP       | 0.841 |
| Czechia                               | CZE       | 0.828 |
| Côte d'Ivoire                         | CIV       | 0.408 |
| Democratic People's Republic of Korea | PRK       | 0.558 |
| Democratic Republic of the Congo      | COD       | 0.382 |
| Denmark                               | DNK       | 0.89  |
| Djibouti                              | DJI       | 0.459 |
| Dominica                              | DMA       | 0.729 |
| Dominican Republic                    | DOM       | 0.592 |
| Ecuador                               | ECU       | 0.64  |
| Egypt                                 | EGY       | 0.658 |
| El Salvador                           | SLV       | 0.573 |
| Equatorial Guinea                     | GNQ       | 0.685 |
| Eritrea                               | ERI       | 0.396 |
| Estonia                               | EST       | 0.835 |
| Eswatini                              | SWZ       | 0.577 |
| Ethiopia                              | ETH       | 0.343 |
| Fiji                                  | FJI       | 0.664 |
| Finland                               | FIN       | 0.856 |
| France                                | FRA       | 0.834 |
| Gabon                                 | GAB       | 0.656 |
| Gambia                                | GMB       | 0.399 |
| Georgia                               | GEO       | 0.702 |
| Germany                               | DEU       | 0.898 |
| Ghana                                 | GHA       | 0.557 |
| Greece                                | GRC       | 0.794 |
| Greenland                             | GRL       | 0.761 |
| Grenada                               | GRD       | 0.669 |
| Guam                                  | GUM       | 0.813 |
| Guatemala                             | GTM       | 0.526 |
| Guinea                                | GIN       | 0.325 |
| Guinea-Bissau                         | GNB       | 0.355 |
| Guyana                                | GUY       | 0.618 |
| Haiti                                 | HTI       | 0.432 |
| Honduras                              | HND       | 0.496 |

| Location                         | ISO3 code | SDI   |
|----------------------------------|-----------|-------|
| Hungary                          | HUN       | 0.791 |
| Iceland                          | ISL       | 0.869 |
| India                            | IND       | 0.566 |
| Indonesia                        | IDN       | 0.66  |
| Iran (Islamic Republic of)       | IRN       | 0.67  |
| Iraq                             | IRQ       | 0.671 |
| Ireland                          | IRL       | 0.867 |
| Israel                           | ISR       | 0.803 |
| Italy                            | ITA       | 0.801 |
| Jamaica                          | JAM       | 0.684 |
| Japan                            | JPN       | 0.87  |
| Jordan                           | JOR       | 0.731 |
| Kazakhstan                       | KAZ       | 0.723 |
| Kenya                            | KEN       | 0.508 |
| Kiribati                         | KIR       | 0.527 |
| Kuwait                           | KWT       | 0.851 |
| Kyrgyzstan                       | KGZ       | 0.596 |
| Lao People's Democratic Republic | LAO       | 0.49  |
| Latvia                           | LVA       | 0.82  |
| Lebanon                          | LBN       | 0.708 |
| Lesotho                          | LSO       | 0.507 |
| Liberia                          | LBR       | 0.37  |
| Libya                            | LBY       | 0.709 |
| Lithuania                        | LTU       | 0.843 |
| Luxembourg                       | LUX       | 0.895 |
| Madagascar                       | MDG       | 0.396 |
| Malawi                           | MWI       | 0.384 |
| Malaysia                         | MYS       | 0.737 |
| Maldives                         | MDV       | 0.562 |
| Mali                             | MLI       | 0.263 |
| Malta                            | MLT       | 0.801 |
| Marshall Islands                 | MHL       | 0.544 |
| Mauritania                       | MRT       | 0.496 |
| Mauritius                        | MUS       | 0.705 |
| Mexico                           | MEX       | 0.649 |
| Micronesia (Federated States of) | FSM       | 0.58  |
| Monaco                           | MCO       | 0.902 |
| Mongolia                         | MNG       | 0.606 |
| Montenegro                       | MNE       | 0.791 |
| Morocco                          | MAR       | 0.548 |
| Mozambique                       | MOZ       | 0.307 |



| Location                         | ISO3 code | SDI   |
|----------------------------------|-----------|-------|
| Myanmar                          | MMR       | 0.521 |
| Namibia                          | NAM       | 0.612 |
| Nauru                            | NRU       | 0.618 |
| Nepal                            | NPL       | 0.422 |
| Netherlands                      | NLD       | 0.883 |
| New Zealand                      | NZL       | 0.84  |
| Nicaragua                        | NIC       | 0.517 |
| Niger                            | NER       | 0.162 |
| Nigeria                          | NGA       | 0.515 |
| Niue                             | NIU       | 0.711 |
| North Macedonia                  | MKD       | 0.744 |
| Northern Mariana Islands         | MNP       | 0.771 |
| Norway                           | NOR       | 0.913 |
| Oman                             | OMN       | 0.783 |
| Pakistan                         | PAK       | 0.449 |
| Palau                            | PLW       | 0.738 |
| Palestine                        | PSE       | 0.588 |
| Panama                           | PAN       | 0.686 |
| Papua New Guinea                 | PNG       | 0.394 |
| Paraguay                         | PRY       | 0.638 |
| Peru                             | PER       | 0.648 |
| Philippines                      | PHL       | 0.623 |
| Poland                           | POL       | 0.802 |
| Portugal                         | PRT       | 0.743 |
| Puerto Rico                      | PRI       | 0.814 |
| Qatar                            | QAT       | 0.83  |
| Republic of Korea                | KOR       | 0.878 |
| Republic of Moldova              | MDA       | 0.696 |
| Romania                          | ROU       | 0.76  |
| Russian Federation               | RUS       | 0.805 |
| Rwanda                           | RWA       | 0.429 |
| Saint Kitts and Nevis            | KNA       | 0.746 |
| Saint Lucia                      | LCA       | 0.67  |
| Saint Vincent and the Grenadines | VCT       | 0.627 |
| Samoa                            | WSM       | 0.641 |
| San Marino                       | SMR       | 0.884 |
| Sao Tome and Principe            | STP       | 0.502 |
| Saudi Arabia                     | SAU       | 0.805 |
| Senegal                          | SEN       | 0.389 |
| Serbia                           | SRB       | 0.767 |
| Seychelles                       | SYC       | 0.724 |

| <b>Location</b>                    | <b>ISO3 code</b> | <b>SDI</b> |
|------------------------------------|------------------|------------|
| Sierra Leone                       | SLE              | 0.347      |
| Singapore                          | SGP              | 0.861      |
| Slovakia                           | SVK              | 0.812      |
| Slovenia                           | SVN              | 0.84       |
| Solomon Islands                    | SLB              | 0.407      |
| Somalia                            | SOM              | 0.081      |
| South Africa                       | ZAF              | 0.678      |
| South Sudan                        | SSD              | 0.363      |
| Spain                              | ESP              | 0.767      |
| Sri Lanka                          | LKA              | 0.69       |
| Sudan                              | SDN              | 0.515      |
| Suriname                           | SUR              | 0.636      |
| Sweden                             | SWE              | 0.872      |
| Switzerland                        | CHE              | 0.929      |
| Syrian Arab Republic               | SYR              | 0.619      |
| Taiwan (Province of China)         | TWN              | 0.868      |
| Tajikistan                         | TJK              | 0.539      |
| Thailand                           | THA              | 0.687      |
| Timor-Leste                        | TLS              | 0.514      |
| Togo                               | TGO              | 0.417      |
| Tokelau                            | TKL              | 0.626      |
| Tonga                              | TON              | 0.636      |
| Trinidad and Tobago                | TTO              | 0.757      |
| Tunisia                            | TUN              | 0.672      |
| Turkey                             | TUR              | 0.748      |
| Turkmenistan                       | TKM              | 0.67       |
| Tuvalu                             | TUV              | 0.589      |
| Uganda                             | UGA              | 0.404      |
| Ukraine                            | UKR              | 0.736      |
| United Arab Emirates               | ARE              | 0.88       |
| United Kingdom                     | GBR              | 0.847      |
| United Republic of Tanzania        | TZA              | 0.423      |
| United States of America           | USA              | 0.859      |
| United States Virgin Islands       | VIR              | 0.799      |
| Uruguay                            | URY              | 0.697      |
| Uzbekistan                         | UZB              | 0.631      |
| Vanuatu                            | VUT              | 0.485      |
| Venezuela (Bolivarian Republic of) | VEN              | 0.607      |
| Viet Nam                           | VNM              | 0.617      |
| Yemen                              | YEM              | 0.412      |
| Zambia                             | ZMB              | 0.505      |

1  
2  
3  
4  
5  
6  
7  
8  
9  
10  
11  
12  
13  
14  
15  
16  
17  
18  
19  
20  
21  
22  
23  
24  
25  
26  
27  
28  
29  
30  
31  
32  
33  
34  
35  
36  
37  
38  
39  
40  
41  
42  
43  
44  
45  
46  
47  
48  
49  
50  
51  
52  
53  
54  
55  
56  
57  
58  
59  
60

| <b>Location</b> | <b>ISO3 code</b> | <b>SDI</b> |
|-----------------|------------------|------------|
| Zimbabwe        | ZWE              | 0.476      |

For peer review only

Table 7. Years lived with disability for 2019 and percentage changes of age-standardized rates by location for traumatic brain injury, 1990–2019

|                                  | YLDs                         |                                                          |                                                                        |
|----------------------------------|------------------------------|----------------------------------------------------------|------------------------------------------------------------------------|
|                                  | Numbers (95% UI)<br>(2019)   | Age-standardized rates per 100,000<br>(95% UI)<br>(2019) | Percentage change of age-standardized rates<br>(95% UI)<br>(1990–2019) |
| <b>Global</b>                    | 7076902 (4997948 to 9588098) | 87 (61 to 117)                                           | 0.1% (-1% to 1.3%)                                                     |
| <b>High-income</b>               | 1360583 (957111 to 1837205)  | 88 (61 to 118)                                           | -8.9% (-10.1% to -7.7%)                                                |
| <b>High-income North America</b> | 342093 (241165 to 461325)    | 69 (48 to 93)                                            | -11.5% (-13% to -9.8%)                                                 |
| Canada                           | 58904 (41426 to 79662)       | 107 (75 to 144)                                          | -3.2% (-6.9% to 0.8%)                                                  |
| Greenland                        | 37 (26 to 49)                | 56 (39 to 75)                                            | -23.1% (-26.6% to -19.5%)                                              |
| United States of America         | 283146 (199948 to 381051)    | 65 (45 to 87)                                            | -13.5% (-15.1% to -11.9%)                                              |
| <b>Australasia</b>               | 62658 (44000 to 84416)       | 166 (115 to 225)                                         | 2.2% (-0.7% to 5.4%)                                                   |
| Australia                        | 51733 (36213 to 69985)       | 162 (112 to 220)                                         | 2.8% (-0.6% to 6.5%)                                                   |
| New Zealand                      | 10925 (7716 to 14864)        | 187 (132 to 254)                                         | 0.8% (-2.2% to 4.3%)                                                   |
| <b>High-income Asia Pacific</b>  | 222787 (156099 to 301904)    | 76 (53 to 104)                                           | -9.5% (-11.4% to -7.7%)                                                |
| Brunei Darussalam                | 408 (287 to 557)             | 94 (67 to 128)                                           | -13.9% (-17.4% to -10.5%)                                              |
| Japan                            | 131214 (91583 to 177340)     | 61 (43 to 83)                                            | -16.3% (-17.7% to -14.9%)                                              |
| Republic of Korea                | 84408 (58733 to 115371)      | 111 (78 to 152)                                          | -8.5% (-12% to -4.9%)                                                  |
| Singapore                        | 6757 (4714 to 9192)          | 92 (64 to 125)                                           | -2.3% (-6.4% to 1.8%)                                                  |
| <b>Western Europe</b>            | 655051 (458429 to 881035)    | 100 (70 to 136)                                          | -8.8% (-10.8% to -6.7%)                                                |
| Andorra                          | 153 (107 to 208)             | 126 (88 to 170)                                          | 1.5% (-2.4% to 5.6%)                                                   |
| Austria                          | 14826 (10349 to 20156)       | 112 (78 to 151)                                          | -12% (-15.6% to -8.1%)                                                 |
| Belgium                          | 22555 (15827 to 30372)       | 132 (91 to 178)                                          | 4.9% (0.8% to 9.2%)                                                    |
| Cyprus                           | 1721 (1213 to 2332)          | 104 (73 to 141)                                          | 1.7% (-3.1% to 6.2%)                                                   |
| Denmark                          | 8047 (5630 to 10829)         | 99 (69 to 135)                                           | -14.1% (-18% to -9.9%)                                                 |

1  
2  
3  
4  
5  
6  
7  
8  
9  
10  
11  
12  
13  
14  
15  
16  
17  
18  
19  
20  
21  
22  
23  
24  
25  
26  
27  
28  
29  
30  
31  
32  
33  
34  
35  
36  
37  
38  
39  
40  
41  
42  
43  
44  
45  
46

|                               | YLDs                       |                                                          |                                                                        |
|-------------------------------|----------------------------|----------------------------------------------------------|------------------------------------------------------------------------|
|                               | Numbers (95% UI)<br>(2019) | Age-standardized rates per 100,000<br>(95% UI)<br>(2019) | Percentage change of age-standardized rates<br>(95% UI)<br>(1990–2019) |
| Finland                       | 12214 (8542 to 16578)      | 146 (101 to 198)                                         | -6.2% (-9.9% to -2.4%)                                                 |
| France                        | 122822 (85860 to 166276)   | 122 (85 to 165)                                          | -7.7% (-11.7% to -3.9%)                                                |
| Germany                       | 135464 (94583 to 183616)   | 102 (71 to 139)                                          | -4.9% (-8.9% to -0.4%)                                                 |
| Greece                        | 14822 (10382 to 20098)     | 99 (69 to 135)                                           | -12.1% (-15.9% to -8.2%)                                               |
| Iceland                       | 453 (317 to 610)           | 103 (71 to 139)                                          | -4.3% (-8.4% to 0%)                                                    |
| Ireland                       | 6046 (4161 to 8182)        | 99 (68 to 134)                                           | -1.7% (-6.4% to 3%)                                                    |
| Israel                        | 9508 (6760 to 13018)       | 96 (68 to 131)                                           | 3.1% (-2.3% to 8.9%)                                                   |
| Italy                         | 93736 (66044 to 126346)    | 96 (67 to 131)                                           | -18.3% (-20% to -16.5%)                                                |
| Luxembourg                    | 963 (676 to 1301)          | 115 (80 to 156)                                          | -12% (-15.4% to -8.3%)                                                 |
| Malta                         | 699 (489 to 938)           | 111 (78 to 149)                                          | 10% (5.2% to 14.8%)                                                    |
| Monaco                        | 29 (20 to 39)              | 51 (36 to 70)                                            | 0.3% (-5% to 5.3%)                                                     |
| Netherlands                   | 25119 (17756 to 33892)     | 96 (68 to 130)                                           | 6.8% (2.1% to 11.5%)                                                   |
| Norway                        | 3921 (2761 to 5272)        | 53 (37 to 71)                                            | -15.8% (-17.6% to -13.8%)                                              |
| Portugal                      | 12024 (8572 to 16421)      | 72 (51 to 99)                                            | -30.8% (-34.4% to -27.3%)                                              |
| San Marino                    | 24 (17 to 32)              | 53 (37 to 72)                                            | -7.1% (-11.7% to -2.6%)                                                |
| Spain                         | 65877 (45969 to 89448)     | 97 (68 to 133)                                           | -11.9% (-16.4% to -7.3%)                                               |
| Sweden                        | 7003 (4895 to 9443)        | 48 (34 to 65)                                            | -14.1% (-17.9% to -10.1%)                                              |
| Switzerland                   | 17102 (12059 to 23120)     | 130 (90 to 175)                                          | -17.9% (-21.3% to -14.3%)                                              |
| United Kingdom                | 79351 (55900 to 107435)    | 85 (59 to 115)                                           | -1.8% (-3.6% to 0%)                                                    |
| <b>Southern Latin America</b> | 77994 (55135 to 105285)    | 104 (74 to 141)                                          | 7.5% (4.2% to 11%)                                                     |
| Argentina                     | 50115 (35459 to 67528)     | 102 (72 to 137)                                          | 6.1% (1.8% to 10.5%)                                                   |
| Chile                         | 23074 (16248 to 30963)     | 107 (75 to 144)                                          | 12.8% (8.4% to 17.2%)                                                  |
| Uruguay                       | 4802 (3353 to 6507)        | 116 (81 to 158)                                          | 1.2% (-3% to 5.6%)                                                     |

1  
2  
3  
4  
5  
6  
7  
8  
9  
10  
11  
12  
13  
14  
15  
16  
17  
18  
19  
20  
21  
22  
23  
24  
25  
26  
27  
28  
29  
30  
31  
32  
33  
34  
35  
36  
37  
38  
39  
40  
41  
42  
43  
44  
45  
46

|                                                         | YLDs                       |                                                          |                                                                        |
|---------------------------------------------------------|----------------------------|----------------------------------------------------------|------------------------------------------------------------------------|
|                                                         | Numbers (95% UI)<br>(2019) | Age-standardized rates per 100,000<br>(95% UI)<br>(2019) | Percentage change of age-standardized rates<br>(95% UI)<br>(1990–2019) |
| <b>Central Europe, Eastern Europe, and Central Asia</b> | 913700 (644818 to 1239156) | 173 (122 to 235)                                         | -16.9% (-17.9% to -15.9%)                                              |
| <b>Eastern Europe</b>                                   | 536447 (376708 to 725229)  | 193 (136 to 261)                                         | -17.4% (-18.5% to -16.3%)                                              |
| Belarus                                                 | 22096 (15455 to 29994)     | 173 (121 to 235)                                         | -12.8% (-15.6% to -9.9%)                                               |
| Estonia                                                 | 2784 (1953 to 3788)        | 154 (107 to 210)                                         | -34.6% (-37% to -32.1%)                                                |
| Latvia                                                  | 4361 (3084 to 5934)        | 161 (114 to 220)                                         | -36.9% (-39.1% to -34.7%)                                              |
| Lithuania                                               | 7172 (5059 to 9771)        | 177 (124 to 241)                                         | -26.7% (-29.1% to -24.2%)                                              |
| Republic of Moldova                                     | 6673 (4694 to 9089)        | 138 (98 to 189)                                          | -25.4% (-27.9% to -22.7%)                                              |
| Russian Federation                                      | 387145 (272036 to 522377)  | 200 (141 to 271)                                         | -17.5% (-18.8% to -16.1%)                                              |
| Ukraine                                                 | 106217 (74659 to 143539)   | 181 (127 to 245)                                         | -16.1% (-18.6% to -13.5%)                                              |
| <b>Central Europe</b>                                   | 289346 (203891 to 392223)  | 185 (130 to 251)                                         | -9.2% (-10.6% to -7.7%)                                                |
| Albania                                                 | 5913 (4153 to 8047)        | 174 (122 to 238)                                         | 0.2% (-3.5% to 3.6%)                                                   |
| Bosnia and Herzegovina                                  | 7966 (5840 to 10686)       | 180 (131 to 242)                                         | 14% (9.5% to 19.8%)                                                    |
| Bulgaria                                                | 16763 (11871 to 22686)     | 178 (125 to 241)                                         | -9.3% (-12.3% to -6.3%)                                                |
| Croatia                                                 | 13031 (9190 to 17543)      | 210 (147 to 284)                                         | -6.7% (-10% to -3.7%)                                                  |
| Czechia                                                 | 30328 (21306 to 41027)     | 204 (142 to 277)                                         | -11.8% (-14.7% to -8.7%)                                               |
| Hungary                                                 | 24110 (16879 to 32515)     | 175 (123 to 238)                                         | -18.9% (-21.9% to -15.9%)                                              |
| Montenegro                                              | 1451 (1015 to 1975)        | 184 (129 to 250)                                         | 0.1% (-3.1% to 3.1%)                                                   |
| North Macedonia                                         | 4402 (3104 to 5938)        | 161 (113 to 217)                                         | 5.7% (2.1% to 9.1%)                                                    |
| Poland                                                  | 101897 (71521 to 138435)   | 193 (135 to 262)                                         | -7.5% (-9.4% to -5.7%)                                                 |
| Romania                                                 | 43079 (30195 to 58391)     | 165 (115 to 223)                                         | -14% (-16.8% to -11.2%)                                                |
| Serbia                                                  | 19024 (13534 to 25615)     | 167 (118 to 226)                                         | -4.9% (-8.8% to -0.6%)                                                 |
| Slovakia                                                | 14550 (10196 to 19759)     | 198 (138 to 270)                                         | -6.4% (-9.3% to -3.2%)                                                 |

1  
2  
3  
4  
5  
6  
7  
8  
9  
10  
11  
12  
13  
14  
15  
16  
17  
18  
19  
20  
21  
22  
23  
24  
25  
26  
27  
28  
29  
30  
31  
32  
33  
34  
35  
36  
37  
38  
39  
40  
41  
42  
43  
44  
45  
46

|                                    | YLDs                       |                                                          |                                                                        |
|------------------------------------|----------------------------|----------------------------------------------------------|------------------------------------------------------------------------|
|                                    | Numbers (95% UI)<br>(2019) | Age-standardized rates per 100,000<br>(95% UI)<br>(2019) | Percentage change of age-standardized rates<br>(95% UI)<br>(1990–2019) |
| Slovenia                           | 6831 (4851 to 9290)        | 223 (157 to 303)                                         | -15.4% (-18% to -12.6%)                                                |
| <b>Central Asia</b>                | 87908 (62104 to 118441)    | 96 (68 to 129)                                           | -7.9% (-9.8% to -6%)                                                   |
| Armenia                            | 3855 (2879 to 5035)        | 107 (80 to 139)                                          | -34.2% (-39.4% to -29.5%)                                              |
| Azerbaijan                         | 9254 (6507 to 12554)       | 82 (57 to 111)                                           | -9.9% (-14.1% to -5.4%)                                                |
| Georgia                            | 5528 (3927 to 7487)        | 122 (86 to 164)                                          | 5.7% (1% to 9.9%)                                                      |
| Kazakhstan                         | 22119 (15369 to 29968)     | 116 (80 to 156)                                          | -1.7% (-5.4% to 2.1%)                                                  |
| Kyrgyzstan                         | 5357 (3746 to 7331)        | 90 (63 to 123)                                           | -14.6% (-18.4% to -10.7%)                                              |
| Mongolia                           | 3614 (2527 to 4944)        | 108 (76 to 148)                                          | 23.6% (18.8% to 28.9%)                                                 |
| Tajikistan                         | 6424 (4676 to 8702)        | 79 (58 to 107)                                           | -15.4% (-20.4% to -7.8%)                                               |
| Turkmenistan                       | 3832 (2673 to 5211)        | 78 (54 to 105)                                           | -6.2% (-10.7% to -1.7%)                                                |
| Uzbekistan                         | 27924 (19438 to 38027)     | 88 (61 to 120)                                           | 0.8% (-3.4% to 5.3%)                                                   |
| <b>Latin America and Caribbean</b> | 373193 (262150 to 502419)  | 61 (43 to 83)                                            | -6.6% (-8.6% to -4.9%)                                                 |
| <b>Central Latin America</b>       | 181186 (127975 to 243118)  | 72 (51 to 97)                                            | -12.9% (-15.1% to -11.1%)                                              |
| Colombia                           | 49058 (34579 to 66389)     | 96 (67 to 129)                                           | -21% (-24.8% to -17.4%)                                                |
| Costa Rica                         | 4616 (3252 to 6244)        | 90 (64 to 122)                                           | 3.2% (-0.9% to 7.2%)                                                   |
| El Salvador                        | 6163 (4489 to 8066)        | 101 (74 to 133)                                          | -15.3% (-27% to -5.2%)                                                 |
| Guatemala                          | 11867 (8491 to 15982)      | 82 (58 to 110)                                           | -0.3% (-11.1% to 8.3%)                                                 |
| Honduras                           | 6477 (4576 to 8738)        | 80 (57 to 107)                                           | 6.2% (1.4% to 11.5%)                                                   |
| Mexico                             | 66975 (46700 to 90175)     | 53 (37 to 72)                                            | -12.8% (-14.3% to -11.4%)                                              |
| Nicaragua                          | 4465 (3234 to 5975)        | 79 (57 to 105)                                           | -20.8% (-32.2% to -10.6%)                                              |
| Panama                             | 3399 (2382 to 4556)        | 81 (57 to 109)                                           | -4.9% (-9.2% to -0.5%)                                                 |
| Venezuela (Bolivarian Republic of) | 28166 (19857 to 38293)     | 95 (67 to 129)                                           | -4.1% (-8.1% to 0.1%)                                                  |
| <b>Andean Latin America</b>        | 38002 (26845 to 51360)     | 62 (44 to 84)                                            | 5.8% (1.3% to 10.1%)                                                   |

1  
2  
3  
4  
5  
6  
7  
8  
9  
10  
11  
12  
13  
14  
15  
16  
17  
18  
19  
20  
21  
22  
23  
24  
25  
26  
27  
28  
29  
30  
31  
32  
33  
34  
35  
36  
37  
38  
39  
40  
41  
42  
43  
44  
45  
46

|                                  | YLDs                       |                                                          |                                                                        |
|----------------------------------|----------------------------|----------------------------------------------------------|------------------------------------------------------------------------|
|                                  | Numbers (95% UI)<br>(2019) | Age-standardized rates per 100,000<br>(95% UI)<br>(2019) | Percentage change of age-standardized rates<br>(95% UI)<br>(1990–2019) |
| Bolivia (Plurinational State of) | 5668 (3998 to 7760)        | 54 (38 to 74)                                            | 2% (-3.6% to 7.7%)                                                     |
| Ecuador                          | 11962 (8388 to 16108)      | 72 (51 to 97)                                            | 9.1% (3.8% to 14.4%)                                                   |
| Peru                             | 20373 (14499 to 27345)     | 60 (43 to 81)                                            | 4.9% (-1.7% to 11.4%)                                                  |
| <b>Caribbean</b>                 | 40644 (28816 to 54647)     | 81 (57 to 109)                                           | 9% (5.7% to 13.4%)                                                     |
| Antigua and Barbuda              | 72 (51 to 98)              | 71 (50 to 96)                                            | 7.3% (2.2% to 12.3%)                                                   |
| Bahamas                          | 310 (218 to 421)           | 75 (52 to 101)                                           | 3.8% (-1.1% to 9%)                                                     |
| Barbados                         | 252 (176 to 342)           | 66 (46 to 90)                                            | 3.8% (-1.4% to 9%)                                                     |
| Belize                           | 298 (211 to 407)           | 82 (58 to 111)                                           | 12.6% (7.8% to 17.7%)                                                  |
| Bermuda                          | 45 (31 to 61)              | 50 (35 to 68)                                            | -6.6% (-11.8% to -1%)                                                  |
| Cuba                             | 14632 (10260 to 19851)     | 93 (66 to 126)                                           | -0.4% (-5.1% to 4.2%)                                                  |
| Dominica                         | 55 (39 to 75)              | 70 (49 to 95)                                            | 10.1% (5.5% to 15%)                                                    |
| Dominican Republic               | 9454 (6610 to 12921)       | 90 (63 to 123)                                           | 30% (24.1% to 36.1%)                                                   |
| Grenada                          | 80 (56 to 108)             | 71 (50 to 96)                                            | 11.3% (3.9% to 18.3%)                                                  |
| Guyana                           | 561 (392 to 763)           | 76 (53 to 103)                                           | 20.2% (14.4% to 25.9%)                                                 |
| Haiti                            | 7284 (5476 to 9644)        | 69 (52 to 91)                                            | 23.2% (10.8% to 41.9%)                                                 |
| Jamaica                          | 1858 (1294 to 2526)        | 62 (43 to 84)                                            | 4.8% (-0.7% to 10.9%)                                                  |
| Puerto Rico                      | 2444 (1722 to 3287)        | 51 (36 to 69)                                            | -12.5% (-17.1% to -7%)                                                 |
| Saint Kitts and Nevis            | 34 (24 to 46)              | 50 (35 to 67)                                            | 8% (3.1% to 13.3%)                                                     |
| Saint Lucia                      | 149 (105 to 202)           | 72 (51 to 98)                                            | 4.7% (-0.9% to 10.7%)                                                  |
| Saint Vincent and the Grenadines | 84 (59 to 114)             | 66 (46 to 90)                                            | 10.6% (5% to 16.9%)                                                    |
| Suriname                         | 432 (305 to 583)           | 71 (50 to 96)                                            | 5.5% (-1.5% to 11.3%)                                                  |
| Trinidad and Tobago              | 1160 (818 to 1573)         | 70 (49 to 95)                                            | 13.5% (7.8% to 19.7%)                                                  |
| United States Virgin Islands     | 64 (45 to 87)              | 47 (33 to 64)                                            | -14.9% (-19.5% to -9.8%)                                               |



1  
2  
3  
4  
5  
6  
7  
8  
9  
10  
11  
12  
13  
14  
15  
16  
17  
18  
19  
20  
21  
22  
23  
24  
25  
26  
27  
28  
29  
30  
31  
32  
33  
34  
35  
36  
37  
38  
39  
40  
41  
42  
43  
44  
45  
46

|                                               | YLDs                        |                                                          |                                                                        |
|-----------------------------------------------|-----------------------------|----------------------------------------------------------|------------------------------------------------------------------------|
|                                               | Numbers (95% UI)<br>(2019)  | Age-standardized rates per 100,000<br>(95% UI)<br>(2019) | Percentage change of age-standardized rates<br>(95% UI)<br>(1990–2019) |
| <b>Tropical Latin America</b>                 | 113361 (79088 to 154099)    | 46 (32 to 63)                                            | -5.1% (-8.5% to -1.6%)                                                 |
| Brazil                                        | 108257 (75602 to 147092)    | 45 (32 to 61)                                            | -5.7% (-9.2% to -2.2%)                                                 |
| Paraguay                                      | 5103 (3604 to 6965)         | 78 (55 to 107)                                           | 5.8% (0.9% to 10.9%)                                                   |
| <b>Southeast Asia, East Asia, and Oceania</b> | 1403425 (994536 to 1907325) | 53 (38 to 72)                                            | 37.8% (35.3% to 40.5%)                                                 |
| <b>East Asia</b>                              | 961990 (676389 to 1304904)  | 49 (34 to 66)                                            | 57.4% (53.8% to 61.4%)                                                 |
| China                                         | 928651 (653288 to 1259096)  | 49 (34 to 66)                                            | 62.2% (58.4% to 66.3%)                                                 |
| Democratic People's Republic of Korea         | 14583 (10154 to 20004)      | 46 (32 to 63)                                            | 5.6% (-1% to 11.3%)                                                    |
| Taiwan (Province of China)                    | 18755 (13050 to 25434)      | 54 (38 to 74)                                            | -22.2% (-26.2% to -17.8%)                                              |
| <b>Southeast Asia</b>                         | 435373 (313813 to 588454)   | 64 (46 to 86)                                            | 2.2% (-0.2% to 5%)                                                     |
| Cambodia                                      | 10450 (7541 to 14233)       | 72 (52 to 97)                                            | 7.1% (-14% to 22.2%)                                                   |
| Indonesia                                     | 111645 (79306 to 151466)    | 43 (30 to 58)                                            | -9.7% (-12.4% to -6.3%)                                                |
| Lao People's Democratic Republic              | 3769 (2634 to 5135)         | 62 (44 to 85)                                            | 0.8% (-4.7% to 5.8%)                                                   |
| Malaysia                                      | 25949 (18147 to 35442)      | 84 (59 to 115)                                           | 10.3% (5.3% to 15.3%)                                                  |
| Maldives                                      | 284 (204 to 386)            | 60 (43 to 81)                                            | 12.5% (6.6% to 19.3%)                                                  |
| Mauritius                                     | 709 (497 to 965)            | 44 (31 to 61)                                            | 12.2% (4.5% to 19.1%)                                                  |
| Myanmar                                       | 37979 (28490 to 49831)      | 71 (53 to 93)                                            | 10.9% (2.5% to 24.2%)                                                  |
| Philippines                                   | 63439 (45829 to 85592)      | 65 (47 to 87)                                            | -4.1% (-6.3% to -2.2%)                                                 |
| Seychelles                                    | 56 (39 to 76)               | 48 (33 to 64)                                            | 10.9% (4.4% to 17.5%)                                                  |
| Sri Lanka                                     | 21080 (15551 to 27555)      | 86 (64 to 113)                                           | 18.1% (10.3% to 28.9%)                                                 |
| Thailand                                      | 70147 (49354 to 94871)      | 76 (53 to 103)                                           | -12.6% (-16.4% to -8.8%)                                               |

1  
2  
3  
4  
5  
6  
7  
8  
9  
10  
11  
12  
13  
14  
15  
16  
17  
18  
19  
20  
21  
22  
23  
24  
25  
26  
27  
28  
29  
30  
31  
32  
33  
34  
35  
36  
37  
38  
39  
40  
41  
42  
43  
44  
45  
46

|                                     | YLDs                       |                                                          |                                                                        |
|-------------------------------------|----------------------------|----------------------------------------------------------|------------------------------------------------------------------------|
|                                     | Numbers (95% UI)<br>(2019) | Age-standardized rates per 100,000<br>(95% UI)<br>(2019) | Percentage change of age-standardized rates<br>(95% UI)<br>(1990–2019) |
| Timor-Leste                         | 722 (530 to 963)           | 73 (53 to 97)                                            | 4.9% (-1.2% to 11.4%)                                                  |
| Viet Nam                            | 88575 (62570 to 120852)    | 86 (61 to 117)                                           | 29.2% (23.7% to 35.1%)                                                 |
| <b>Oceania</b>                      | 6062 (4359 to 8110)        | 59 (42 to 79)                                            | 19.7% (14.7% to 25.6%)                                                 |
| American Samoa                      | 20 (15 to 27)              | 38 (29 to 50)                                            | -0.6% (-8.2% to 10.3%)                                                 |
| Cook Islands                        | 9 (7 to 12)                | 43 (30 to 58)                                            | -12.5% (-17.6% to -7.7%)                                               |
| Fiji                                | 404 (285 to 550)           | 46 (32 to 62)                                            | 5.3% (-0.5% to 11.6%)                                                  |
| Guam                                | 71 (49 to 96)              | 39 (27 to 53)                                            | -11.9% (-16.9% to -6.8%)                                               |
| Kiribati                            | 36 (25 to 49)              | 36 (26 to 49)                                            | 5.7% (-1.6% to 12.9%)                                                  |
| Marshall Islands                    | 25 (17 to 34)              | 51 (36 to 69)                                            | 3.6% (-1.8% to 9%)                                                     |
| Micronesia (Federated States of)    | 49 (34 to 66)              | 54 (38 to 73)                                            | 8.2% (2.2% to 14.5%)                                                   |
| Nauru                               | 3 (2 to 4)                 | 40 (28 to 55)                                            | -1.4% (-7% to 5.1%)                                                    |
| Niue                                | 1 (1 to 1)                 | 39 (28 to 52)                                            | 4.2% (-2.8% to 11.9%)                                                  |
| Northern Mariana Islands            | 22 (16 to 30)              | 42 (30 to 57)                                            | -20.1% (-24.4% to -15.6%)                                              |
| Palau                               | 10 (7 to 14)               | 45 (32 to 61)                                            | 3.1% (-2.3% to 8.7%)                                                   |
| Papua New Guinea                    | 4562 (3302 to 6098)        | 63 (45 to 84)                                            | 23% (16.5% to 30.4%)                                                   |
| Samoa                               | 114 (84 to 150)            | 64 (47 to 85)                                            | 20.6% (13% to 30.8%)                                                   |
| Solomon Islands                     | 284 (200 to 381)           | 60 (42 to 81)                                            | 12% (6.4% to 18.1%)                                                    |
| Tokelau                             | 0 (0 to 1)                 | 36 (25 to 48)                                            | 5.7% (0.1% to 12.2%)                                                   |
| Tonga                               | 41 (29 to 55)              | 46 (33 to 63)                                            | 0.4% (-5.5% to 7.6%)                                                   |
| Tuvalu                              | 4 (3 to 5)                 | 36 (25 to 48)                                            | 16.2% (9.2% to 25%)                                                    |
| Vanuatu                             | 120 (87 to 160)            | 52 (37 to 69)                                            | 5.9% (-0.4% to 13.1%)                                                  |
| <b>North Africa and Middle East</b> | 453033 (331629 to 604021)  | 80 (59 to 107)                                           | 1.9% (-3.5% to 5.4%)                                                   |
| <b>North Africa and Middle East</b> | 453033 (331629 to 604021)  | 80 (59 to 107)                                           | 1.9% (-3.5% to 5.4%)                                                   |

1  
2  
3  
4  
5  
6  
7  
8  
9  
10  
11  
12  
13  
14  
15  
16  
17  
18  
19  
20  
21  
22  
23  
24  
25  
26  
27  
28  
29  
30  
31  
32  
33  
34  
35  
36  
37  
38  
39  
40  
41  
42  
43  
44  
45  
46

|                            | YLDs                            |                                                          |                                                                        |
|----------------------------|---------------------------------|----------------------------------------------------------|------------------------------------------------------------------------|
|                            | Numbers (95% UI)<br>(2019)      | Age-standardized rates per 100,000<br>(95% UI)<br>(2019) | Percentage change of age-standardized rates<br>(95% UI)<br>(1990–2019) |
| Afghanistan                | 25411 (16490 to 40529)          | 106 (66 to 177)                                          | -18.2% (-43.5% to 22.8%)                                               |
| Algeria                    | 29937 (21475 to 40072)          | 74 (53 to 99)                                            | -10.6% (-14.9% to -6%)                                                 |
| Bahrain                    | 1239 (871 to 1704)              | 71 (50 to 97)                                            | 3.6% (-2.3% to 9.8%)                                                   |
| Egypt                      | 50341 (35383 to 68471)          | 59 (41 to 79)                                            | 4% (-2.1% to 10.7%)                                                    |
| Iran (Islamic Republic of) | 70192 (52341 to 93184)          | 80 (60 to 106)                                           | -28.1% (-34.8% to -23.2%)                                              |
| Iraq                       | 37310 (26823 to 50871)          | 106 (76 to 143)                                          | -19.9% (-30.1% to -10.6%)                                              |
| Jordan                     | 5884 (4095 to 7991)             | 59 (41 to 80)                                            | -3.9% (-8.6% to 1%)                                                    |
| Kuwait                     | 3711 (2638 to 5012)             | 81 (58 to 109)                                           | -12% (-18% to -6.7%)                                                   |
| Lebanon                    | 4026 (2849 to 5569)             | 76 (54 to 105)                                           | -30.4% (-42.8% to -18%)                                                |
| Libya                      | 6320 (4603 to 8529)             | 91 (66 to 123)                                           | 9.9% (3.2% to 18.6%)                                                   |
| Morocco                    | 26514 (18727 to 35851)          | 74 (52 to 100)                                           | 2.5% (-2.9% to 7.6%)                                                   |
| Oman                       | 4246 (2938 to 5805)             | 100 (70 to 136)                                          | -5.4% (-9.6% to -0.8%)                                                 |
| Palestine                  | 3728 (2642 to 5148)             | 97 (69 to 133)                                           | 10.2% (2.1% to 17.8%)                                                  |
| Qatar                      | 2857 (1994 to 3911)             | 97 (68 to 132)                                           | -10.5% (-14.8% to -6.2%)                                               |
| Saudi Arabia               | 55075 (38616 to 75312)          | 156 (109 to 212)                                         | 25% (20.1% to 29.7%)                                                   |
| Sudan                      | 10734 (7768 to 14444)           | 37 (27 to 50)                                            | 4.9% (-1.9% to 12.7%)                                                  |
| Syrian Arab Republic       | 15764 (10567 to 23012)          | 116 (76 to 170)                                          | 107.7% (51.8% to 211.9%)                                               |
| Tunisia                    | 9380 (6559 to 12772)            | 73 (51 to 99)                                            | 3.5% (-1.5% to 8.8%)                                                   |
| Turkey                     | 62842 (45196 to 84968)          | 69 (50 to 93)                                            | 18.9% (12.6% to 26.1%)                                                 |
| United Arab Emirates       | 9976 (6962 to 13671)            | 87 (61 to 119)                                           | -4.9% (-9.5% to 0%)                                                    |
| Yemen                      | 17087 (12086 to 23384)          | 75 (54 to 101)                                           | 16.7% (4.8% to 33.9%)                                                  |
| <b>South Asia</b>          | 2190818 (1536215 to<br>2967664) | 135 (95 to 183)                                          | 24.4% (22.8% to 26.1%)                                                 |

1  
2  
3  
4  
5  
6  
7  
8  
9  
10  
11  
12  
13  
14  
15  
16  
17  
18  
19  
20  
21  
22  
23  
24  
25  
26  
27  
28  
29  
30  
31  
32  
33  
34  
35  
36  
37  
38  
39  
40  
41  
42  
43  
44  
45  
46

|                                    | YLDs                         |                                                          |                                                                        |
|------------------------------------|------------------------------|----------------------------------------------------------|------------------------------------------------------------------------|
|                                    | Numbers (95% UI)<br>(2019)   | Age-standardized rates per 100,000<br>(95% UI)<br>(2019) | Percentage change of age-standardized rates<br>(95% UI)<br>(1990–2019) |
| <b>South Asia</b>                  | 2190818 (1536215 to 2967664) | 135 (95 to 183)                                          | 24.4% (22.8% to 26.1%)                                                 |
| Bangladesh                         | 137433 (96855 to 186188)     | 91 (64 to 123)                                           | 22% (16.9% to 27.6%)                                                   |
| Bhutan                             | 802 (568 to 1096)            | 116 (82 to 158)                                          | 28.5% (23.3% to 34.2%)                                                 |
| India                              | 1870307 (1310196 to 2531657) | 145 (102 to 196)                                         | 22.9% (21.2% to 24.6%)                                                 |
| Nepal                              | 25880 (18657 to 34764)       | 98 (71 to 132)                                           | 20.5% (15.2% to 26.7%)                                                 |
| Pakistan                           | 156397 (110431 to 211564)    | 96 (68 to 129)                                           | 36% (32.2% to 40.3%)                                                   |
| <b>Sub-Saharan Africa</b>          | 382150 (275687 to 515793)    | 55 (39 to 73)                                            | 0.8% (-1.4% to 2.6%)                                                   |
| <b>Southern Sub-Saharan Africa</b> | 27272 (19047 to 36610)       | 40 (28 to 53)                                            | -22% (-24% to -20%)                                                    |
| Botswana                           | 807 (560 to 1087)            | 40 (28 to 54)                                            | 19.6% (12.7% to 26.9%)                                                 |
| Eswatini                           | 324 (226 to 442)             | 38 (27 to 51)                                            | 7.6% (1.7% to 14%)                                                     |
| Lesotho                            | 664 (463 to 898)             | 38 (27 to 52)                                            | 25.3% (17.5% to 33.6%)                                                 |
| Namibia                            | 848 (603 to 1142)            | 46 (33 to 61)                                            | -1% (-9.7% to 6.7%)                                                    |
| South Africa                       | 21643 (15178 to 28943)       | 41 (29 to 55)                                            | -27.1% (-29.1% to -24.8%)                                              |
| Zimbabwe                           | 2988 (2099 to 4074)          | 29 (20 to 39)                                            | -9.1% (-14.8% to -3.1%)                                                |
| <b>Western Sub-Saharan Africa</b>  | 146349 (103313 to 197859)    | 52 (37 to 70)                                            | 12.4% (11.1% to 14.1%)                                                 |
| Benin                              | 4004 (2807 to 5466)          | 54 (38 to 73)                                            | 8.8% (3.5% to 14.6%)                                                   |
| Burkina Faso                       | 7705 (5360 to 10461)         | 58 (40 to 78)                                            | 25.2% (19.5% to 31.5%)                                                 |
| Cabo Verde                         | 254 (177 to 344)             | 50 (35 to 68)                                            | 22.4% (15.8% to 29.1%)                                                 |
| Cameroon                           | 11816 (8246 to 16095)        | 64 (46 to 88)                                            | 7.8% (3.1% to 13%)                                                     |
| Chad                               | 4729 (3386 to 6432)          | 55 (40 to 74)                                            | 17.9% (9.9% to 25.4%)                                                  |
| Côte d'Ivoire                      | 9078 (6327 to 12400)         | 54 (38 to 73)                                            | 5.2% (0.1% to 10.7%)                                                   |

1  
2  
3  
4  
5  
6  
7  
8  
9  
10  
11  
12  
13  
14  
15  
16  
17  
18  
19  
20  
21  
22  
23  
24  
25  
26  
27  
28  
29  
30  
31  
32  
33  
34  
35  
36  
37  
38  
39  
40  
41  
42  
43  
44  
45  
46

|                                   | YLDs                       |                                                          |                                                                        |
|-----------------------------------|----------------------------|----------------------------------------------------------|------------------------------------------------------------------------|
|                                   | Numbers (95% UI)<br>(2019) | Age-standardized rates per 100,000<br>(95% UI)<br>(2019) | Percentage change of age-standardized rates<br>(95% UI)<br>(1990–2019) |
| Gambia                            | 638 (451 to 866)           | 46 (33 to 63)                                            | 5.5% (-0.3% to 10.9%)                                                  |
| Ghana                             | 15368 (10684 to 20817)     | 66 (46 to 89)                                            | 22.3% (16.8% to 28.2%)                                                 |
| Guinea                            | 4240 (2937 to 5743)        | 55 (38 to 74)                                            | 17.4% (11.5% to 23.4%)                                                 |
| Guinea-Bissau                     | 754 (523 to 1012)          | 62 (43 to 84)                                            | 6.1% (1.4% to 11.3%)                                                   |
| Liberia                           | 1578 (1139 to 2109)        | 49 (36 to 66)                                            | -7.3% (-22.1% to 4.6%)                                                 |
| Mali                              | 6452 (4613 to 8736)        | 52 (37 to 70)                                            | 12.8% (5.9% to 21.5%)                                                  |
| Mauritania                        | 1800 (1249 to 2459)        | 65 (46 to 89)                                            | -6.2% (-10.4% to -1.6%)                                                |
| Niger                             | 5650 (3980 to 7687)        | 47 (33 to 64)                                            | 5.3% (-0.3% to 10.8%)                                                  |
| Nigeria                           | 60912 (42958 to 82353)     | 47 (33 to 63)                                            | 10.4% (8.8% to 12.8%)                                                  |
| Sao Tome and Principe             | 82 (57 to 111)             | 55 (38 to 75)                                            | 21.6% (15.4% to 28.1%)                                                 |
| Senegal                           | 5031 (3527 to 6891)        | 50 (35 to 68)                                            | 9.1% (3.6% to 14.7%)                                                   |
| Sierra Leone                      | 3084 (2249 to 4110)        | 58 (42 to 76)                                            | 27.1% (17.3% to 41.7%)                                                 |
| Togo                              | 3173 (2211 to 4304)        | 57 (40 to 77)                                            | 4.4% (-0.3% to 9.1%)                                                   |
| <b>Eastern Sub-Saharan Africa</b> | 158772 (115632 to 212654)  | 61 (44 to 81)                                            | -4.6% (-8.9% to -1.8%)                                                 |
| Burundi                           | 8672 (6103 to 12139)       | 111 (79 to 154)                                          | 64.9% (29% to 133.1%)                                                  |
| Comoros                           | 430 (301 to 588)           | 71 (50 to 97)                                            | 4.8% (0.1% to 9.6%)                                                    |
| Djibouti                          | 546 (386 to 741)           | 59 (42 to 80)                                            | 0.9% (-4% to 6.5%)                                                     |
| Eritrea                           | 3231 (2346 to 4468)        | 73 (54 to 102)                                           | -29.2% (-44.5% to -10.6%)                                              |
| Ethiopia                          | 46122 (32994 to 62059)     | 70 (51 to 93)                                            | -18.3% (-26.5% to -12%)                                                |
| Kenya                             | 22105 (15512 to 29939)     | 64 (45 to 86)                                            | 4.7% (3.4% to 6.2%)                                                    |
| Madagascar                        | 9033 (6300 to 12243)       | 51 (36 to 69)                                            | -7.2% (-12.3% to -2.2%)                                                |
| Malawi                            | 4867 (3373 to 6630)        | 41 (29 to 56)                                            | -0.3% (-5.5% to 5.4%)                                                  |
| Mozambique                        | 11785 (8413 to 15762)      | 69 (50 to 92)                                            | -0.2% (-15.2% to 10.8%)                                                |

1  
2  
3  
4  
5  
6  
7  
8  
9  
10  
11  
12  
13  
14  
15  
16  
17  
18  
19  
20  
21  
22  
23  
24  
25  
26  
27  
28  
29  
30  
31  
32  
33  
34  
35  
36  
37  
38  
39  
40  
41  
42  
43  
44  
45  
46

|                                   | YLDs                       |                                                          |                                                                        |
|-----------------------------------|----------------------------|----------------------------------------------------------|------------------------------------------------------------------------|
|                                   | Numbers (95% UI)<br>(2019) | Age-standardized rates per 100,000<br>(95% UI)<br>(2019) | Percentage change of age-standardized rates<br>(95% UI)<br>(1990–2019) |
| Rwanda                            | 6728 (4867 to 9024)        | 75 (55 to 100)                                           | 6.4% (-8.7% to 37.8%)                                                  |
| Somalia                           | 6429 (4643 to 8636)        | 52 (38 to 70)                                            | 5.7% (-6.7% to 16%)                                                    |
| South Sudan                       | 3706 (2671 to 4957)        | 63 (45 to 83)                                            | 0% (-6.6% to 8%)                                                       |
| Uganda                            | 12677 (9152 to 16970)      | 54 (39 to 72)                                            | 2.7% (-10.1% to 12.9%)                                                 |
| United Republic of Tanzania       | 17639 (12368 to 24008)     | 48 (34 to 65)                                            | 2.8% (-2.6% to 8.2%)                                                   |
| Zambia                            | 4675 (3269 to 6385)        | 41 (29 to 56)                                            | 4.4% (-1.2% to 10.4%)                                                  |
| <b>Central Sub-Saharan Africa</b> | 49757 (36254 to 66187)     | 57 (42 to 77)                                            | 7.8% (3.3% to 13.1%)                                                   |
| Angola                            | 12323 (9051 to 16261)      | 66 (49 to 87)                                            | -3.9% (-11.9% to 4.3%)                                                 |
| Central African Republic          | 2060 (1512 to 2777)        | 54 (40 to 71)                                            | 29.1% (15.9% to 50.3%)                                                 |
| Congo                             | 2309 (1677 to 3084)        | 57 (42 to 76)                                            | 17% (5.6% to 34.8%)                                                    |
| Democratic Republic of the Congo  | 31757 (22970 to 42327)     | 55 (39 to 72)                                            | 9.6% (2.6% to 19.6%)                                                   |
| Equatorial Guinea                 | 474 (334 to 646)           | 52 (37 to 71)                                            | 18.4% (12.1% to 24.5%)                                                 |
| Gabon                             | 834 (582 to 1128)          | 59 (41 to 80)                                            | 0.8% (-3.8% to 6.1%)                                                   |

Abbreviations: YLDs, years lived with disability; UI, uncertainty interval

1

2

3

4

5

6

7

8

9

10

11

12

13

14

15

16

17

18

19

20

21

22

23

24

25

26

27

28

29

30

31

32

33

34

35

36

37

38

39

40

41

42

43

44

45

46

**Table 8. Incidence, prevalence, and years lived with disability for 1990 by location for traumatic brain injury**

|                                  | Incidence                       |                                                             | Prevalence                      |                                                                 | YLDs                          |                                                             |
|----------------------------------|---------------------------------|-------------------------------------------------------------|---------------------------------|-----------------------------------------------------------------|-------------------------------|-------------------------------------------------------------|
|                                  | Numbers<br>(95% UI)<br>(1990)   | Age-standardized<br>rates per 100,000<br>(95% UI)<br>(1990) | Numbers<br>(95% UI)<br>(1990)   | Age-standardized<br>estimates per 100,000<br>(95% UI)<br>(1990) | Numbers<br>(95% UI)<br>(1990) | Age-standardized<br>rates per 100,000<br>(95% UI)<br>(1990) |
| <b>Global</b>                    | 18853869 (16215389 to 21806108) | 366 (317 to 421)                                            | 27223249 (26109471 to 28451588) | 599 (576 to 626)                                                | 3953933 (2777811 to 5334853)  | 86 (61 to 117)                                              |
| <b>High-income</b>               | 4048422 (3493149 to 4776726)    | 431 (369 to 515)                                            | 7083312 (6797231 to 7400614)    | 669 (642 to 699)                                                | 1014882 (712991 to 1373593)   | 96 (67 to 130)                                              |
| <b>High-income North America</b> | 1120251 (915712 to 1386641)     | 392 (318 to 491)                                            | 1787399 (1704060 to 1883324)    | 564 (537 to 595)                                                | 245962 (171414 to 333811)     | 78 (54 to 106)                                              |
| Canada                           | 126742 (112173 to 143701)       | 441 (390 to 501)                                            | 232061 (221455 to 242912)       | 751 (717 to 786)                                                | 34042 (23793 to 46540)        | 110 (77 to 151)                                             |
| Greenland                        | 260 (205 to 339)                | 463 (367 to 600)                                            | 268 (254 to 284)                | 546 (520 to 576)                                                | 36 (25 to 50)                 | 73 (51 to 99)                                               |
| United States of America         | 993223 (800533 to 1253794)      | 388 (310 to 492)                                            | 1555029 (1478138 to 1643310)    | 545 (517 to 576)                                                | 211878 (147546 to 287094)     | 75 (52 to 101)                                              |
| <b>Australasia</b>               | 143293 (121566 to 172676)       | 710 (596 to 863)                                            | 245389 (233066 to 259182)       | 1117 (1059 to 1181)                                             | 35580 (25007 to 48065)        | 162 (114 to 219)                                            |
| Australia                        | 115278 (97486 to 138505)        | 689 (577 to 838)                                            | 198541 (188680 to 209805)       | 1084 (1029 to 1148)                                             | 28806 (20192 to 38986)        | 157 (110 to 212)                                            |
| New Zealand                      | 28015 (23858 to 33989)          | 812 (689 to 985)                                            | 46848 (44344 to 49303)          | 1282 (1214 to 1352)                                             | 6774 (4757 to 9172)           | 186 (131 to 252)                                            |
| <b>High-income Asia Pacific</b>  | 682610 (576222 to 818678)       | 386 (326 to 468)                                            | 1146281 (1098572 to 1197980)    | 583 (560 to 609)                                                | 165215 (115479 to 223728)     | 84 (59 to 114)                                              |
| Brunei Darussalam                | 1159 (995 to 1359)              | 462 (404 to 535)                                            | 1433 (1363 to 1505)             | 748 (716 to 783)                                                | 214 (150 to 295)              | 110 (77 to 148)                                             |

1  
2  
3  
4  
5  
6  
7  
8  
9  
10  
11  
12  
13  
14  
15  
16  
17  
18  
19  
20  
21  
22  
23  
24  
25  
26  
27  
28  
29  
30  
31  
32  
33  
34  
35  
36  
37  
38  
39  
40  
41  
42  
43  
44  
45  
46

|                       | Incidence                     |                                                             | Prevalence                    |                                                                 | YLDs                          |                                                             |
|-----------------------|-------------------------------|-------------------------------------------------------------|-------------------------------|-----------------------------------------------------------------|-------------------------------|-------------------------------------------------------------|
|                       | Numbers<br>(95% UI)<br>(1990) | Age-standardized<br>rates per 100,000<br>(95% UI)<br>(1990) | Numbers<br>(95% UI)<br>(1990) | Age-standardized<br>estimates per 100,000<br>(95% UI)<br>(1990) | Numbers<br>(95% UI)<br>(1990) | Age-standardized<br>rates per 100,000<br>(95% UI)<br>(1990) |
| Japan                 | 439516 (362898 to 539700)     | 344 (282 to 430)                                            | 794144 (759571 to 830984)     | 515 (492 to 539)                                                | 112943 (78986 to 152999)      | 73 (51 to 99)                                               |
| Republic of Korea     | 229572 (198367 to 266154)     | 510 (445 to 589)                                            | 331627 (317243 to 347338)     | 826 (791 to 864)                                                | 49224 (34429 to 66793)        | 121 (85 to 165)                                             |
| Singapore             | 12363 (10572 to 14673)        | 386 (332 to 456)                                            | 19078 (18198 to 20119)        | 636 (609 to 668)                                                | 2834 (1964 to 3874)           | 94 (65 to 128)                                              |
| <b>Western Europe</b> | 1900129 (1658576 to 2211597)  | 459 (398 to 536)                                            | 3589411 (3430217 to 3763722)  | 752 (718 to 789)                                                | 521859 (366129 to 707104)     | 110 (77 to 149)                                             |
| Andorra               | 257 (222 to 300)              | 494 (426 to 577)                                            | 485 (461 to 511)              | 843 (800 to 887)                                                | 72 (50 to 97)                 | 124 (87 to 168)                                             |
| Austria               | 45930 (39911 to 53565)        | 538 (464 to 632)                                            | 84367 (80516 to 88743)        | 867 (826 to 913)                                                | 12269 (8528 to 16668)         | 127 (88 to 173)                                             |
| Belgium               | 54836 (47715 to 63954)        | 512 (441 to 601)                                            | 107317 (102334 to 112625)     | 855 (813 to 898)                                                | 15634 (10923 to 21080)        | 125 (88 to 170)                                             |
| Cyprus                | 3322 (2878 to 3882)           | 437 (379 to 512)                                            | 5615 (5361 to 5897)           | 695 (663 to 730)                                                | 826 (581 to 1120)             | 102 (72 to 138)                                             |
| Denmark               | 31336 (27114 to 36415)        | 512 (443 to 598)                                            | 53543 (50856 to 56416)        | 791 (754 to 830)                                                | 7755 (5449 to 10493)          | 116 (81 to 156)                                             |
| Finland               | 35307 (30443 to 41573)        | 662 (569 to 785)                                            | 65196 (61947 to 69082)        | 1061 (1006 to 1125)                                             | 9497 (6674 to 12879)          | 155 (109 to 211)                                            |
| France                | 355104 (309249 to 412705)     | 552 (479 to 648)                                            | 635312 (606658 to 665578)     | 898 (859 to 942)                                                | 92736 (65233 to 125053)       | 132 (93 to 178)                                             |
| Germany               | 387145 (335603 to 449564)     | 447 (386 to 524)                                            | 755519 (721936 to 795139)     | 732 (698 to 772)                                                | 110220 (77245 to 149618)      | 108 (75 to 146)                                             |



1  
2  
3  
4  
5  
6  
7  
8  
9  
10  
11  
12  
13  
14  
15  
16  
17  
18  
19  
20  
21  
22  
23  
24  
25  
26  
27  
28  
29  
30  
31  
32  
33  
34  
35  
36  
37  
38  
39  
40  
41  
42  
43  
44  
45  
46

|             | Incidence                     |                                                             | Prevalence                    |                                                                 | YLDs                          |                                                             |
|-------------|-------------------------------|-------------------------------------------------------------|-------------------------------|-----------------------------------------------------------------|-------------------------------|-------------------------------------------------------------|
|             | Numbers<br>(95% UI)<br>(1990) | Age-standardized<br>rates per 100,000<br>(95% UI)<br>(1990) | Numbers<br>(95% UI)<br>(1990) | Age-standardized<br>estimates per 100,000<br>(95% UI)<br>(1990) | Numbers<br>(95% UI)<br>(1990) | Age-standardized<br>rates per 100,000<br>(95% UI)<br>(1990) |
| Greece      | 46034 (40112 to 53668)        | 436 (374 to 510)                                            | 96681 (92044 to 101849)       | 763 (725 to 805)                                                | 14192 (9960 to 19169)         | 113 (79 to 152)                                             |
| Iceland     | 1120 (971 to 1320)            | 429 (370 to 506)                                            | 1951 (1860 to 2050)           | 728 (694 to 766)                                                | 286 (201 to 388)              | 107 (75 to 145)                                             |
| Ireland     | 15276 (13121 to 17950)        | 420 (360 to 493)                                            | 25441 (24177 to 26775)        | 686 (652 to 723)                                                | 3737 (2589 to 5076)           | 101 (70 to 137)                                             |
| Israel      | 19147 (16486 to 22607)        | 383 (331 to 452)                                            | 29810 (28368 to 31355)        | 629 (599 to 661)                                                | 4397 (3066 to 5955)           | 93 (65 to 126)                                              |
| Italy       | 311925 (264451 to 373554)     | 490 (418 to 581)                                            | 594610 (561364 to 626824)     | 808 (764 to 852)                                                | 86061 (60155 to 116787)       | 118 (82 to 160)                                             |
| Luxembourg  | 2190 (1907 to 2530)           | 545 (471 to 634)                                            | 4203 (4008 to 4421)           | 889 (848 to 935)                                                | 615 (432 to 829)              | 131 (92 to 177)                                             |
| Malta       | 1559 (1335 to 1841)           | 426 (363 to 507)                                            | 2782 (2636 to 2936)           | 685 (648 to 724)                                                | 408 (287 to 553)              | 101 (71 to 136)                                             |
| Monaco      | 78 (63 to 98)                 | 275 (215 to 350)                                            | 164 (156 to 172)              | 366 (348 to 386)                                                | 22 (16 to 30)                 | 51 (36 to 69)                                               |
| Netherlands | 59151 (51424 to 68439)        | 374 (324 to 432)                                            | 108496 (103271 to 113683)     | 612 (583 to 643)                                                | 15909 (11173 to 21703)        | 90 (63 to 123)                                              |
| Norway      | 15876 (12909 to 19920)        | 350 (279 to 445)                                            | 24469 (23315 to 25771)        | 456 (435 to 479)                                                | 3324 (2336 to 4499)           | 63 (44 to 85)                                               |
| Portugal    | 43355 (38038 to 49550)        | 418 (364 to 480)                                            | 84457 (80974 to 88627)        | 713 (683 to 749)                                                | 12329 (8677 to 16672)         | 105 (74 to 142)                                             |
| San Marino  | 71 (56 to 91)                 | 305 (239 to 389)                                            | 112 (107 to 118)              | 407 (388 to 429)                                                | 16 (11 to 21)                 | 57 (40 to 77)                                               |
| Spain       | 170769 (149645 to 196464)     | 427 (372 to 498)                                            | 340863 (326210 to 356774)     | 747 (715 to 783)                                                | 50036 (35096 to 67824)        | 110 (77 to 149)                                             |

1  
2  
3  
4  
5  
6  
7  
8  
9  
10  
11  
12  
13  
14  
15  
16  
17  
18  
19  
20  
21  
22  
23  
24  
25  
26  
27  
28  
29  
30  
31  
32  
33  
34  
35  
36  
37  
38  
39  
40  
41  
42  
43  
44  
45  
46

|                                                         | Incidence                     |                                                             | Prevalence                    |                                                                 | YLDs                          |                                                             |
|---------------------------------------------------------|-------------------------------|-------------------------------------------------------------|-------------------------------|-----------------------------------------------------------------|-------------------------------|-------------------------------------------------------------|
|                                                         | Numbers<br>(95% UI)<br>(1990) | Age-standardized<br>rates per 100,000<br>(95% UI)<br>(1990) | Numbers<br>(95% UI)<br>(1990) | Age-standardized<br>estimates per 100,000<br>(95% UI)<br>(1990) | Numbers<br>(95% UI)<br>(1990) | Age-standardized<br>rates per 100,000<br>(95% UI)<br>(1990) |
| Sweden                                                  | 27855 (22159 to 35604)        | 322 (250 to 420)                                            | 46088 (43789 to 48587)        | 411 (390 to 434)                                                | 6247 (4389 to 8442)           | 56 (40 to 76)                                               |
| Switzerland                                             | 52629 (45812 to 61541)        | 675 (583 to 792)                                            | 95970 (91290 to 100912)       | 1082 (1027 to 1137)                                             | 13892 (9797 to 18811)         | 158 (111 to 214)                                            |
| United Kingdom                                          | 218280 (187260 to 257578)     | 369 (314 to 437)                                            | 422981 (402489 to 443629)     | 599 (570 to 630)                                                | 60948 (42742 to 82260)        | 87 (61 to 118)                                              |
| <b>Southern Latin America</b>                           | 202139 (174596 to 238831)     | 409 (354 to 481)                                            | 314832 (302011 to 328300)     | 661 (635 to 689)                                                | 46267 (32375 to 62358)        | 97 (68 to 131)                                              |
| Argentina                                               | 133041 (114953 to 157207)     | 404 (350 to 476)                                            | 211134 (202345 to 220806)     | 655 (628 to 685)                                                | 31020 (21788 to 41792)        | 96 (68 to 130)                                              |
| Chile                                                   | 53588 (46283 to 63533)        | 403 (351 to 474)                                            | 77223 (74043 to 80606)        | 649 (624 to 678)                                                | 11380 (7906 to 15406)         | 95 (66 to 128)                                              |
| Uruguay                                                 | 15502 (13094 to 18725)        | 494 (416 to 601)                                            | 26462 (25314 to 27602)        | 782 (747 to 816)                                                | 3865 (2698 to 5241)           | 115 (80 to 156)                                             |
| <b>Central Europe, Eastern Europe, and Central Asia</b> | 3448923 (2993981 to 3970637)  | 814 (706 to 941)                                            | 6453206 (6144026 to 6810900)  | 1421 (1353 to 1499)                                             | 943958 (661605 to 1277133)    | 208 (146 to 282)                                            |
| <b>Eastern Europe</b>                                   | 2111822 (1829230 to 2431948)  | 913 (788 to 1057)                                           | 4141204 (3921920 to 4395004)  | 1593 (1511 to 1688)                                             | 604907 (424334 to 817583)     | 233 (164 to 316)                                            |
| Belarus                                                 | 82407 (72591 to 94495)        | 776 (681 to 890)                                            | 160205 (152714 to 168752)     | 1345 (1281 to 1414)                                             | 23518 (16376 to 32097)        | 198 (138 to 271)                                            |
| Estonia                                                 | 15139 (13274 to 17122)        | 946 (827 to 1070)                                           | 29223 (27868 to 30752)        | 1597 (1521 to 1679)                                             | 4277 (2978 to 5809)           | 235 (164 to 319)                                            |

1  
2  
3  
4  
5  
6  
7  
8  
9  
10  
11  
12  
13  
14  
15  
16  
17  
18  
19  
20  
21  
22  
23  
24  
25  
26  
27  
28  
29  
30  
31  
32  
33  
34  
35  
36  
37  
38  
39  
40  
41  
42  
43  
44  
45  
46

|                        | Incidence                     |                                                             | Prevalence                    |                                                                 | YLDs                          |                                                             |
|------------------------|-------------------------------|-------------------------------------------------------------|-------------------------------|-----------------------------------------------------------------|-------------------------------|-------------------------------------------------------------|
|                        | Numbers<br>(95% UI)<br>(1990) | Age-standardized<br>rates per 100,000<br>(95% UI)<br>(1990) | Numbers<br>(95% UI)<br>(1990) | Age-standardized<br>estimates per 100,000<br>(95% UI)<br>(1990) | Numbers<br>(95% UI)<br>(1990) | Age-standardized<br>rates per 100,000<br>(95% UI)<br>(1990) |
| Latvia                 | 28612 (25205 to 32672)        | 1040 (913 to 1188)                                          | 55190 (52619 to 58063)        | 1742 (1662 to 1833)                                             | 8038 (5651 to 10926)          | 255 (179 to 347)                                            |
| Lithuania              | 36467 (32025 to 41606)        | 958 (840 to 1095)                                           | 68835 (65919 to 72396)        | 1648 (1577 to 1732)                                             | 10053 (7071 to 13649)         | 242 (170 to 328)                                            |
| Republic of Moldova    | 33134 (29064 to 37940)        | 740 (650 to 845)                                            | 57736 (55297 to 60492)        | 1260 (1207 to 1321)                                             | 8505 (5924 to 11540)          | 185 (129 to 252)                                            |
| Russian Federation     | 1460908 (1259645 to 1686720)  | 946 (812 to 1102)                                           | 2844919 (2690581 to 3021463)  | 1658 (1569 to 1758)                                             | 415551 (290189 to 561463)     | 243 (170 to 329)                                            |
| Ukraine                | 455155 (390046 to 532796)     | 850 (726 to 999)                                            | 925096 (875143 to 984013)     | 1471 (1391 to 1563)                                             | 134965 (95231 to 182486)      | 216 (152 to 293)                                            |
| <b>Central Europe</b>  | 1050449 (918891 to 1208699)   | 846 (738 to 979)                                            | 1905530 (1824286 to 1993636)  | 1389 (1329 to 1454)                                             | 278598 (195451 to 377346)     | 204 (143 to 276)                                            |
| Albania                | 24290 (20268 to 29847)        | 707 (593 to 860)                                            | 32988 (31362 to 34644)        | 1185 (1128 to 1242)                                             | 4883 (3432 to 6644)           | 174 (122 to 236)                                            |
| Bosnia and Herzegovina | 31248 (26595 to 36809)        | 680 (578 to 801)                                            | 50335 (48011 to 52860)        | 1075 (1026 to 1129)                                             | 7424 (5249 to 10029)          | 158 (112 to 213)                                            |
| Bulgaria               | 67563 (59061 to 77434)        | 799 (691 to 924)                                            | 140389 (134253 to 147124)     | 1332 (1273 to 1396)                                             | 20529 (14452 to 27707)        | 196 (137 to 266)                                            |
| Croatia                | 45918 (40136 to 52198)        | 920 (800 to 1049)                                           | 88909 (84838 to 92936)        | 1530 (1459 to 1599)                                             | 13018 (9165 to 17568)         | 225 (158 to 303)                                            |
| Czechia                | 108400 (95345 to 123811)      | 998 (873 to 1148)                                           | 190939 (182529 to 199866)     | 1581 (1510 to 1658)                                             | 27847 (19624 to 37900)        | 232 (163 to 315)                                            |

1  
2  
3  
4  
5  
6  
7  
8  
9  
10  
11  
12  
13  
14  
15  
16  
17  
18  
19  
20  
21  
22  
23  
24  
25  
26  
27  
28  
29  
30  
31  
32  
33  
34  
35  
36  
37  
38  
39  
40  
41  
42  
43  
44  
45  
46

|                     | Incidence                     |                                                             | Prevalence                    |                                                                 | YLDs                          |                                                             |
|---------------------|-------------------------------|-------------------------------------------------------------|-------------------------------|-----------------------------------------------------------------|-------------------------------|-------------------------------------------------------------|
|                     | Numbers<br>(95% UI)<br>(1990) | Age-standardized<br>rates per 100,000<br>(95% UI)<br>(1990) | Numbers<br>(95% UI)<br>(1990) | Age-standardized<br>estimates per 100,000<br>(95% UI)<br>(1990) | Numbers<br>(95% UI)<br>(1990) | Age-standardized<br>rates per 100,000<br>(95% UI)<br>(1990) |
| Hungary             | 107982 (94821 to 123481)      | 964 (847 to 1105)                                           | 188342 (179917 to 196921)     | 1482 (1418 to 1550)                                             | 27345 (19336 to 37321)        | 216 (152 to 295)                                            |
| Montenegro          | 4648 (4046 to 5422)           | 736 (640 to 859)                                            | 8049 (7690 to 8410)           | 1247 (1192 to 1303)                                             | 1188 (833 to 1615)            | 184 (129 to 250)                                            |
| North Macedonia     | 12604 (10778 to 14886)        | 619 (530 to 732)                                            | 21250 (20272 to 22230)        | 1036 (989 to 1084)                                              | 3138 (2192 to 4235)           | 153 (107 to 206)                                            |
| Poland              | 326391 (281406 to 381390)     | 847 (730 to 995)                                            | 592344 (565150 to 624014)     | 1425 (1359 to 1501)                                             | 86522 (60412 to 116964)       | 208 (145 to 282)                                            |
| Romania             | 187639 (163095 to 217914)     | 798 (690 to 928)                                            | 341836 (326973 to 358956)     | 1307 (1249 to 1370)                                             | 49979 (35005 to 67925)        | 192 (133 to 261)                                            |
| Serbia              | 63400 (54940 to 73105)        | 685 (589 to 796)                                            | 127430 (121821 to 133686)     | 1187 (1134 to 1245)                                             | 18768 (13173 to 25405)        | 175 (123 to 238)                                            |
| Slovakia            | 48267 (42123 to 55944)        | 899 (782 to 1043)                                           | 81811 (78231 to 85769)        | 1444 (1379 to 1514)                                             | 11979 (8428 to 16274)         | 212 (149 to 288)                                            |
| Slovenia            | 22098 (19335 to 25416)        | 1079 (935 to 1251)                                          | 40908 (39030 to 42872)        | 1797 (1713 to 1884)                                             | 5978 (4228 to 8143)           | 263 (186 to 359)                                            |
| <b>Central Asia</b> | 286651 (249571 to 332136)     | 410 (358 to 472)                                            | 406473 (388360 to 426724)     | 704 (674 to 739)                                                | 60453 (42819 to 81137)        | 104 (74 to 140)                                             |
| Armenia             | 16547 (14288 to 19180)        | 479 (416 to 554)                                            | 35694 (30551 to 43742)        | 1101 (950 to 1342)                                              | 5275 (3906 to 6815)           | 162 (121 to 210)                                            |
| Azerbaijan          | 27908 (24115 to 32533)        | 367 (318 to 424)                                            | 38686 (36987 to 40640)        | 611 (585 to 642)                                                | 5777 (3992 to 7870)           | 91 (63 to 123)                                              |

1  
2  
3  
4  
5  
6  
7  
8  
9  
10  
11  
12  
13  
14  
15  
16  
17  
18  
19  
20  
21  
22  
23  
24  
25  
26  
27  
28  
29  
30  
31  
32  
33  
34  
35  
36  
37  
38  
39  
40  
41  
42  
43  
44  
45  
46

|                                    | Incidence                     |                                                             | Prevalence                    |                                                                 | YLDs                          |                                                             |
|------------------------------------|-------------------------------|-------------------------------------------------------------|-------------------------------|-----------------------------------------------------------------|-------------------------------|-------------------------------------------------------------|
|                                    | Numbers<br>(95% UI)<br>(1990) | Age-standardized<br>rates per 100,000<br>(95% UI)<br>(1990) | Numbers<br>(95% UI)<br>(1990) | Age-standardized<br>estimates per 100,000<br>(95% UI)<br>(1990) | Numbers<br>(95% UI)<br>(1990) | Age-standardized<br>rates per 100,000<br>(95% UI)<br>(1990) |
| Georgia                            | 26165 (22663 to 30364)        | 473 (409 to 549)                                            | 46220 (43961 to 48652)        | 777 (739 to 818)                                                | 6836 (4788 to 9279)           | 115 (81 to 156)                                             |
| Kazakhstan                         | 80723 (70244 to 93033)        | 483 (421 to 555)                                            | 120024 (114297 to 126084)     | 797 (759 to 836)                                                | 17806 (12422 to 24221)        | 118 (82 to 160)                                             |
| Kyrgyzstan                         | 19195 (16570 to 22255)        | 432 (375 to 498)                                            | 25831 (24723 to 27104)        | 715 (684 to 751)                                                | 3840 (2694 to 5235)           | 106 (74 to 144)                                             |
| Mongolia                           | 8232 (7097 to 9614)           | 383 (334 to 443)                                            | 9143 (8717 to 9577)           | 594 (568 to 624)                                                | 1364 (945 to 1859)            | 88 (61 to 120)                                              |
| Tajikistan                         | 20222 (17355 to 23810)        | 381 (331 to 442)                                            | 23820 (22738 to 25109)        | 633 (605 to 667)                                                | 3561 (2505 to 4843)           | 94 (65 to 128)                                              |
| Turkmenistan                       | 12629 (10913 to 14680)        | 333 (290 to 384)                                            | 15354 (14621 to 16120)        | 557 (532 to 583)                                                | 2302 (1611 to 3128)           | 83 (58 to 112)                                              |
| Uzbekistan                         | 75031 (64631 to 87357)        | 354 (308 to 408)                                            | 91701 (87543 to 96282)        | 592 (566 to 622)                                                | 13692 (9568 to 18537)         | 88 (61 to 119)                                              |
| <b>Latin America and Caribbean</b> | 1224624 (1025961 to 1471278)  | 311 (264 to 370)                                            | 1408278 (1346293 to 1483754)  | 463 (445 to 486)                                                | 202620 (142813 to 272345)     | 66 (47 to 88)                                               |
| <b>Central Latin America</b>       | 614132 (514302 to 738706)     | 369 (315 to 437)                                            | 709801 (672148 to 755684)     | 579 (552 to 611)                                                | 102992 (73993 to 138066)      | 83 (59 to 110)                                              |
| Colombia                           | 157598 (136622 to 190358)     | 481 (423 to 569)                                            | 211177 (199918 to 223864)     | 823 (782 to 866)                                                | 31423 (22333 to 42234)        | 121 (86 to 162)                                             |
| Costa Rica                         | 10257 (8870 to 11945)         | 351 (307 to 401)                                            | 13910 (13318 to 14642)        | 595 (571 to 624)                                                | 2074 (1433 to 2814)           | 88 (61 to 119)                                              |

1  
2  
3  
4  
5  
6  
7  
8  
9  
10  
11  
12  
13  
14  
15  
16  
17  
18  
19  
20  
21  
22  
23  
24  
25  
26  
27  
28  
29  
30  
31  
32  
33  
34  
35  
36  
37  
38  
39  
40  
41  
42  
43  
44  
45  
46

|                                    | Incidence                     |                                                             | Prevalence                    |                                                                 | YLDs                          |                                                             |
|------------------------------------|-------------------------------|-------------------------------------------------------------|-------------------------------|-----------------------------------------------------------------|-------------------------------|-------------------------------------------------------------|
|                                    | Numbers<br>(95% UI)<br>(1990) | Age-standardized<br>rates per 100,000<br>(95% UI)<br>(1990) | Numbers<br>(95% UI)<br>(1990) | Age-standardized<br>estimates per 100,000<br>(95% UI)<br>(1990) | Numbers<br>(95% UI)<br>(1990) | Age-standardized<br>rates per 100,000<br>(95% UI)<br>(1990) |
| El Salvador                        | 26398 (20821 to 37523)        | 483 (390 to 668)                                            | 34989 (28041 to 46601)        | 835 (688 to 1079)                                               | 5041 (3605 to 6925)           | 120 (87 to 163)                                             |
| Guatemala                          | 30702 (24868 to 40208)        | 383 (318 to 486)                                            | 32528 (28357 to 39768)        | 571 (507 to 676)                                                | 4717 (3396 to 6407)           | 82 (59 to 110)                                              |
| Honduras                           | 15003 (12781 to 17528)        | 306 (267 to 351)                                            | 16208 (15518 to 17034)        | 510 (492 to 532)                                                | 2410 (1669 to 3256)           | 75 (52 to 101)                                              |
| Mexico                             | 279371 (219058 to 358076)     | 320 (257 to 404)                                            | 273095 (259200 to 289310)     | 441 (421 to 464)                                                | 38323 (26631 to 51746)        | 61 (43 to 82)                                               |
| Nicaragua                          | 11712 (9996 to 13780)         | 289 (251 to 331)                                            | 19374 (14550 to 27939)        | 696 (552 to 951)                                                | 2797 (1946 to 4012)           | 100 (71 to 140)                                             |
| Panama                             | 7790 (6726 to 8947)           | 325 (285 to 371)                                            | 11198 (10639 to 11926)        | 578 (551 to 611)                                                | 1668 (1182 to 2235)           | 85 (60 to 114)                                              |
| Venezuela (Bolivarian Republic of) | 75302 (64723 to 87960)        | 394 (343 to 452)                                            | 97324 (93032 to 102354)       | 670 (643 to 699)                                                | 14538 (10051 to 19674)        | 99 (69 to 133)                                              |
| <b>Andean Latin America</b>        | 103322 (87106 to 127542)      | 268 (229 to 325)                                            | 115610 (109587 to 123199)     | 402 (384 to 424)                                                | 17095 (12192 to 23048)        | 59 (42 to 79)                                               |
| Bolivia (Plurinational State of)   | 14398 (12480 to 16778)        | 229 (201 to 263)                                            | 16725 (16072 to 17429)        | 362 (348 to 375)                                                | 2475 (1709 to 3360)           | 53 (37 to 71)                                               |
| Ecuador                            | 25018 (21761 to 28749)        | 255 (224 to 289)                                            | 33356 (31684 to 35275)        | 448 (428 to 469)                                                | 4968 (3561 to 6674)           | 66 (47 to 89)                                               |
| Peru                               | 63906 (51592 to 85784)        | 286 (235 to 378)                                            | 65529 (61055 to 71465)        | 393 (371 to 423)                                                | 9652 (6881 to 13116)          | 57 (41 to 78)                                               |

1

2

3

4

5

6

7

8

9

10

11

12

13

14

15

16

17

18

19

20

21

22

23

24

25

26

27

28

29

30

31

32

33

34

35

36

37

38

39

40

41

42

43

44

45

46

|                       | Incidence                     |                                                             | Prevalence                    |                                                                 | YLDs                          |                                                             |
|-----------------------|-------------------------------|-------------------------------------------------------------|-------------------------------|-----------------------------------------------------------------|-------------------------------|-------------------------------------------------------------|
|                       | Numbers<br>(95% UI)<br>(1990) | Age-standardized<br>rates per 100,000<br>(95% UI)<br>(1990) | Numbers<br>(95% UI)<br>(1990) | Age-standardized<br>estimates per 100,000<br>(95% UI)<br>(1990) | Numbers<br>(95% UI)<br>(1990) | Age-standardized<br>rates per 100,000<br>(95% UI)<br>(1990) |
| <b>Caribbean</b>      | 104915 (91947 to 119513)      | 299 (263 to 338)                                            | 152940 (146922 to 159299)     | 506 (487 to 526)                                                | 22600 (15774 to 30498)        | 74 (52 to 100)                                              |
| Antigua and Barbuda   | 168 (143 to 201)              | 268 (229 to 319)                                            | 247 (237 to 257)              | 447 (429 to 465)                                                | 37 (25 to 50)                 | 66 (46 to 90)                                               |
| Bahamas               | 725 (625 to 828)              | 277 (241 to 313)                                            | 1046 (1001 to 1095)           | 484 (464 to 504)                                                | 157 (110 to 216)              | 72 (50 to 98)                                               |
| Barbados              | 641 (557 to 737)              | 244 (211 to 280)                                            | 1117 (1071 to 1164)           | 428 (410 to 446)                                                | 166 (116 to 225)              | 64 (44 to 86)                                               |
| Belize                | 554 (471 to 658)              | 286 (246 to 331)                                            | 635 (607 to 666)              | 489 (469 to 511)                                                | 95 (66 to 130)                | 73 (51 to 99)                                               |
| Bermuda               | 150 (121 to 184)              | 250 (201 to 308)                                            | 247 (233 to 263)              | 374 (353 to 397)                                                | 36 (25 to 49)                 | 54 (37 to 74)                                               |
| Cuba                  | 41259 (36610 to 46402)        | 372 (331 to 417)                                            | 68303 (65366 to 71259)        | 634 (607 to 661)                                                | 10126 (7061 to 13687)         | 94 (65 to 127)                                              |
| Dominica              | 186 (162 to 213)              | 247 (216 to 281)                                            | 283 (271 to 296)              | 429 (410 to 449)                                                | 42 (29 to 57)                 | 64 (44 to 86)                                               |
| Dominican Republic    | 18517 (15908 to 21389)        | 253 (220 to 288)                                            | 24962 (23821 to 26120)        | 468 (448 to 489)                                                | 3741 (2608 to 5083)           | 69 (48 to 94)                                               |
| Grenada               | 217 (188 to 253)              | 251 (218 to 291)                                            | 309 (290 to 336)              | 434 (408 to 468)                                                | 45 (32 to 61)                 | 64 (45 to 85)                                               |
| Guyana                | 2157 (1897 to 2469)           | 287 (254 to 325)                                            | 2534 (2438 to 2643)           | 432 (417 to 449)                                                | 374 (264 to 510)              | 63 (44 to 85)                                               |
| Haiti                 | 15742 (13525 to 18796)        | 250 (216 to 295)                                            | 18158 (17342 to 18909)        | 385 (370 to 399)                                                | 2680 (1858 to 3638)           | 56 (39 to 76)                                               |
| Jamaica               | 5951 (5034 to 7031)           | 242 (207 to 283)                                            | 7934 (7592 to 8241)           | 401 (385 to 416)                                                | 1176 (817 to 1584)            | 59 (41 to 80)                                               |
| Puerto Rico           | 10006 (8277 to 12091)         | 274 (226 to 331)                                            | 14884 (14164 to 15663)        | 412 (392 to 434)                                                | 2108 (1465 to 2874)           | 58 (41 to 80)                                               |
| Saint Kitts and Nevis | 108 (84 to 139)               | 259 (204 to 330)                                            | 120 (114 to 126)              | 338 (322 to 357)                                                | 17 (12 to 23)                 | 47 (33 to 64)                                               |
| Saint Lucia           | 369 (319 to 425)              | 268 (234 to 304)                                            | 485 (464 to 507)              | 455 (436 to 475)                                                | 72 (50 to 98)                 | 67 (47 to 91)                                               |

1  
2  
3  
4  
5  
6  
7  
8  
9  
10  
11  
12  
13  
14  
15  
16  
17  
18  
19  
20  
21  
22  
23  
24  
25  
26  
27  
28  
29  
30  
31  
32  
33  
34  
35  
36  
37  
38  
39  
40  
41  
42  
43  
44  
45  
46

|                                                   | Incidence                       |                                                             | Prevalence                      |                                                                 | YLDs                          |                                                             |
|---------------------------------------------------|---------------------------------|-------------------------------------------------------------|---------------------------------|-----------------------------------------------------------------|-------------------------------|-------------------------------------------------------------|
|                                                   | Numbers<br>(95% UI)<br>(1990)   | Age-standardized<br>rates per 100,000<br>(95% UI)<br>(1990) | Numbers<br>(95% UI)<br>(1990)   | Age-standardized<br>estimates per 100,000<br>(95% UI)<br>(1990) | Numbers<br>(95% UI)<br>(1990) | Age-standardized<br>rates per 100,000<br>(95% UI)<br>(1990) |
| Saint Vincent and the<br>Grenadines               | 271 (234 to 316)                | 243 (212 to 279)                                            | 345 (331 to 360)                | 404 (388 to 421)                                                | 51 (36 to 69)                 | 60 (42 to 80)                                               |
| Suriname                                          | 991 (857 to 1143)               | 251 (218 to 287)                                            | 1490 (1402 to 1660)             | 455 (430 to 498)                                                | 222 (155 to 301)              | 67 (47 to 91)                                               |
| Trinidad and Tobago                               | 3132 (2698 to 3579)             | 259 (224 to 294)                                            | 4345 (4165 to 4545)             | 417 (401 to 435)                                                | 647 (447 to 872)              | 62 (43 to 83)                                               |
| United States Virgin Islands                      | 276 (225 to 344)                | 260 (213 to 323)                                            | 400 (379 to 422)                | 392 (372 to 413)                                                | 57 (40 to 79)                 | 56 (39 to 76)                                               |
| <b>Tropical Latin America</b>                     | 402255 (323726 to<br>499391)    | 261 (213 to 323)                                            | 429926 (410516 to<br>454470)    | 353 (337 to 371)                                                | 59933 (41675 to<br>80749)     | 49 (34 to 65)                                               |
| Brazil                                            | 390799 (313409 to<br>486773)    | 260 (211 to 323)                                            | 414928 (396357 to<br>438869)    | 349 (334 to 368)                                                | 57701 (40149 to<br>77611)     | 48 (33 to 64)                                               |
| Paraguay                                          | 11457 (9813 to<br>13509)        | 285 (248 to 330)                                            | 14998 (14296 to<br>15823)       | 503 (480 to 528)                                                | 2231 (1540 to<br>3049)        | 74 (52 to 101)                                              |
| <b>Southeast Asia, East Asia,<br/>and Oceania</b> | 3011172 (2496898 to<br>3614257) | 179 (150 to 214)                                            | 3869502 (3689053 to<br>4094076) | 271 (259 to 286)                                                | 558047 (390436 to<br>759042)  | 39 (27 to 52)                                               |
| <b>East Asia</b>                                  | 1777529 (1457606 to<br>2180900) | 146 (120 to 178)                                            | 2330447 (2212990 to<br>2468532) | 219 (209 to 232)                                                | 331950 (231139 to<br>451082)  | 31 (22 to 42)                                               |
| China                                             | 1691121 (1376509 to<br>2086871) | 144 (118 to 176)                                            | 2187277 (2073352 to<br>2318836) | 213 (202 to 226)                                                | 310524 (216428 to<br>421804)  | 30 (21 to 41)                                               |
| Democratic People's Republic<br>of Korea          | 33855 (29762 to<br>39003)       | 166 (146 to 190)                                            | 55706 (53312 to<br>58390)       | 292 (281 to 306)                                                | 8365 (5757 to<br>11421)       | 44 (30 to 59)                                               |
| Taiwan (Province of China)                        | 52553 (46334 to<br>59737)       | 261 (232 to 296)                                            | 87464 (83846 to<br>91581)       | 473 (454 to 494)                                                | 13062 (9050 to<br>17766)      | 70 (49 to 95)                                               |



1  
2  
3  
4  
5  
6  
7  
8  
9  
10  
11  
12  
13  
14  
15  
16  
17  
18  
19  
20  
21  
22  
23  
24  
25  
26  
27  
28  
29  
30  
31  
32  
33  
34  
35  
36  
37  
38  
39  
40  
41  
42  
43  
44  
45  
46

|                                  | Incidence                     |                                                             | Prevalence                    |                                                                 | YLDs                          |                                                             |
|----------------------------------|-------------------------------|-------------------------------------------------------------|-------------------------------|-----------------------------------------------------------------|-------------------------------|-------------------------------------------------------------|
|                                  | Numbers<br>(95% UI)<br>(1990) | Age-standardized<br>rates per 100,000<br>(95% UI)<br>(1990) | Numbers<br>(95% UI)<br>(1990) | Age-standardized<br>estimates per 100,000<br>(95% UI)<br>(1990) | Numbers<br>(95% UI)<br>(1990) | Age-standardized<br>rates per 100,000<br>(95% UI)<br>(1990) |
| <b>Southeast Asia</b>            | 1221270 (1035226 to 1428941)  | 270 (232 to 312)                                            | 1524028 (1446391 to 1621291)  | 430 (410 to 455)                                                | 223869 (157515 to 304129)     | 62 (44 to 84)                                               |
| Cambodia                         | 23951 (20415 to 28766)        | 252 (218 to 293)                                            | 33642 (26316 to 51550)        | 468 (385 to 672)                                                | 4888 (3284 to 7407)           | 67 (47 to 97)                                               |
| Indonesia                        | 405050 (326221 to 499990)     | 220 (180 to 269)                                            | 476448 (448580 to 509803)     | 337 (318 to 359)                                                | 68162 (47545 to 93357)        | 47 (33 to 65)                                               |
| Lao People's Democratic Republic | 11572 (9505 to 15264)         | 292 (245 to 374)                                            | 12303 (11719 to 12991)        | 420 (401 to 441)                                                | 1835 (1274 to 2511)           | 62 (43 to 84)                                               |
| Malaysia                         | 46852 (40411 to 53545)        | 284 (247 to 321)                                            | 68021 (64781 to 71801)        | 516 (493 to 543)                                                | 10197 (7057 to 13976)         | 76 (53 to 104)                                              |
| Maldives                         | 420 (362 to 485)              | 211 (185 to 240)                                            | 495 (474 to 519)              | 360 (345 to 377)                                                | 74 (52 to 101)                | 53 (37 to 72)                                               |
| Mauritius                        | 2048 (1690 to 2468)           | 183 (152 to 219)                                            | 2677 (2549 to 2837)           | 279 (267 to 296)                                                | 383 (267 to 524)              | 40 (28 to 54)                                               |
| Myanmar                          | 111688 (97238 to 129136)      | 281 (246 to 321)                                            | 139640 (130748 to 156551)     | 439 (414 to 483)                                                | 20691 (14652 to 28025)        | 64 (46 to 87)                                               |
| Philippines                      | 178811 (152160 to 209683)     | 294 (252 to 341)                                            | 206438 (194169 to 221200)     | 462 (437 to 491)                                                | 30614 (21882 to 41001)        | 68 (48 to 90)                                               |
| Seychelles                       | 149 (122 to 181)              | 205 (170 to 248)                                            | 188 (179 to 199)              | 304 (289 to 321)                                                | 27 (18 to 36)                 | 43 (30 to 58)                                               |
| Sri Lanka                        | 85269 (60250 to 140083)       | 489 (356 to 775)                                            | 72464 (66989 to 80208)        | 502 (468 to 546)                                                | 10643 (7574 to 14518)         | 73 (52 to 99)                                               |
| Thailand                         | 185784 (161287 to 212248)     | 324 (284 to 367)                                            | 283957 (270592 to 299599)     | 586 (559 to 616)                                                | 42422 (29573 to 58447)        | 86 (61 to 118)                                              |
| Timor-Leste                      | 2892 (2003 to 4865)           | 359 (258 to 575)                                            | 2800 (2173 to 3731)           | 486 (398 to 619)                                                | 404 (288 to 557)              | 70 (51 to 94)                                               |

1  
2  
3  
4  
5  
6  
7  
8  
9  
10  
11  
12  
13  
14  
15  
16  
17  
18  
19  
20  
21  
22  
23  
24  
25  
26  
27  
28  
29  
30  
31  
32  
33  
34  
35  
36  
37  
38  
39  
40  
41  
42  
43  
44  
45  
46

|                                     | Incidence                     |                                                             | Prevalence                    |                                                                 | YLDs                          |                                                             |
|-------------------------------------|-------------------------------|-------------------------------------------------------------|-------------------------------|-----------------------------------------------------------------|-------------------------------|-------------------------------------------------------------|
|                                     | Numbers<br>(95% UI)<br>(1990) | Age-standardized<br>rates per 100,000<br>(95% UI)<br>(1990) | Numbers<br>(95% UI)<br>(1990) | Age-standardized<br>estimates per 100,000<br>(95% UI)<br>(1990) | Numbers<br>(95% UI)<br>(1990) | Age-standardized<br>rates per 100,000<br>(95% UI)<br>(1990) |
| Viet Nam                            | 165161 (142941 to 189272)     | 264 (231 to 300)                                            | 222930 (213114 to 233910)     | 450 (431 to 472)                                                | 33231 (23150 to 45336)        | 66 (46 to 91)                                               |
| <b>Oceania</b>                      | 12373 (10780 to 14206)        | 213 (186 to 242)                                            | 15027 (14382 to 15767)        | 338 (324 to 353)                                                | 2228 (1554 to 3027)           | 49 (34 to 67)                                               |
| American Samoa                      | 87 (71 to 106)                | 187 (155 to 227)                                            | 93 (88 to 99)                 | 278 (263 to 295)                                                | 13 (9 to 18)                  | 39 (27 to 52)                                               |
| Cook Islands                        | 41 (34 to 50)                 | 229 (190 to 273)                                            | 53 (50 to 56)                 | 344 (326 to 367)                                                | 8 (5 to 10)                   | 49 (35 to 67)                                               |
| Fiji                                | 1296 (1125 to 1490)           | 177 (155 to 200)                                            | 1706 (1629 to 1798)           | 295 (283 to 310)                                                | 254 (176 to 347)              | 43 (30 to 59)                                               |
| Guam                                | 275 (225 to 332)              | 198 (164 to 237)                                            | 346 (327 to 367)              | 312 (297 to 331)                                                | 50 (35 to 68)                 | 44 (31 to 60)                                               |
| Kiribati                            | 108 (94 to 124)               | 150 (132 to 170)                                            | 130 (124 to 136)              | 233 (223 to 245)                                                | 19 (14 to 26)                 | 34 (24 to 46)                                               |
| Marshall Islands                    | 81 (71 to 93)                 | 208 (182 to 235)                                            | 90 (86 to 95)                 | 338 (323 to 356)                                                | 13 (9 to 18)                  | 50 (34 to 67)                                               |
| Micronesia (Federated States<br>of) | 193 (168 to 220)              | 211 (184 to 239)                                            | 229 (218 to 241)              | 339 (324 to 358)                                                | 34 (24 to 47)                 | 50 (35 to 67)                                               |
| Nauru                               | 19 (15 to 23)                 | 195 (162 to 234)                                            | 19 (18 to 21)                 | 290 (275 to 309)                                                | 3 (2 to 4)                    | 41 (28 to 56)                                               |
| Niue                                | 4 (3 to 5)                    | 176 (146 to 214)                                            | 6 (5 to 6)                    | 265 (251 to 281)                                                | 1 (1 to 1)                    | 37 (26 to 51)                                               |
| Northern Mariana Islands            | 115 (94 to 139)               | 244 (203 to 294)                                            | 132 (124 to 142)              | 377 (358 to 402)                                                | 19 (13 to 26)                 | 53 (37 to 72)                                               |
| Palau                               | 37 (30 to 45)                 | 237 (196 to 288)                                            | 40 (38 to 43)                 | 320 (303 to 338)                                                | 6 (4 to 8)                    | 44 (31 to 59)                                               |
| Papua New Guinea                    | 7935 (6896 to 9122)           | 221 (193 to 250)                                            | 9638 (9217 to 10099)          | 350 (335 to 366)                                                | 1430 (996 to 1950)            | 51 (36 to 69)                                               |
| Samoa                               | 365 (316 to 423)              | 238 (208 to 271)                                            | 413 (393 to 435)              | 361 (344 to 381)                                                | 62 (43 to 84)                 | 53 (37 to 72)                                               |
| Solomon Islands                     | 698 (607 to 809)              | 246 (216 to 283)                                            | 756 (720 to 795)              | 366 (350 to 384)                                                | 112 (78 to 152)               | 53 (37 to 72)                                               |
| Tokelau                             | 2 (2 to 3)                    | 160 (133 to 193)                                            | 3 (3 to 3)                    | 240 (227 to 255)                                                | 0 (0 to 1)                    | 34 (23 to 46)                                               |
| Tonga                               | 168 (147 to 192)              | 191 (168 to 216)                                            | 217 (207 to 230)              | 315 (301 to 332)                                                | 32 (23 to 44)                 | 46 (33 to 63)                                               |

1  
2  
3  
4  
5  
6  
7  
8  
9  
10  
11  
12  
13  
14  
15  
16  
17  
18  
19  
20  
21  
22  
23  
24  
25  
26  
27  
28  
29  
30  
31  
32  
33  
34  
35  
36  
37  
38  
39  
40  
41  
42  
43  
44  
45  
46

|                                     | Incidence                     |                                                             | Prevalence                    |                                                                 | YLDs                          |                                                             |
|-------------------------------------|-------------------------------|-------------------------------------------------------------|-------------------------------|-----------------------------------------------------------------|-------------------------------|-------------------------------------------------------------|
|                                     | Numbers<br>(95% UI)<br>(1990) | Age-standardized<br>rates per 100,000<br>(95% UI)<br>(1990) | Numbers<br>(95% UI)<br>(1990) | Age-standardized<br>estimates per 100,000<br>(95% UI)<br>(1990) | Numbers<br>(95% UI)<br>(1990) | Age-standardized<br>rates per 100,000<br>(95% UI)<br>(1990) |
| Tuvalu                              | 15 (12 to 18)                 | 162 (135 to 195)                                            | 19 (18 to 20)                 | 239 (226 to 255)                                                | 3 (2 to 4)                    | 34 (23 to 46)                                               |
| Vanuatu                             | 250 (218 to 286)              | 182 (159 to 205)                                            | 306 (292 to 322)              | 304 (290 to 320)                                                | 46 (32 to 62)                 | 45 (31 to 60)                                               |
| <b>North Africa and Middle East</b> | 1282547 (1094820 to 1500156)  | 373 (320 to 432)                                            | 1361137 (1227870 to 1581514)  | 539 (490 to 621)                                                | 201450 (145412 to 269033)     | 79 (57 to 104)                                              |
| <b>North Africa and Middle East</b> | 1282547 (1094820 to 1500156)  | 373 (320 to 432)                                            | 1361137 (1227870 to 1581514)  | 539 (490 to 621)                                                | 201450 (145412 to 269033)     | 79 (57 to 104)                                              |
| Afghanistan                         | 34710 (26794 to 50241)        | 302 (239 to 418)                                            | 86158 (38145 to 226063)       | 944 (440 to 2344)                                               | 11856 (5273 to 28707)         | 129 (60 to 299)                                             |
| Algeria                             | 75841 (65370 to 88606)        | 306 (268 to 349)                                            | 98764 (93969 to 103896)       | 557 (533 to 584)                                                | 14814 (10463 to 20007)        | 83 (58 to 112)                                              |
| Bahrain                             | 1347 (1159 to 1554)           | 261 (227 to 297)                                            | 1947 (1848 to 2051)           | 467 (447 to 489)                                                | 293 (204 to 395)              | 69 (48 to 93)                                               |
| Egypt                               | 119851 (104161 to 138952)     | 218 (191 to 250)                                            | 161672 (154186 to 169480)     | 380 (365 to 397)                                                | 24219 (16935 to 32991)        | 56 (40 to 76)                                               |
| Iran (Islamic Republic of)          | 481149 (369653 to 629092)     | 832 (639 to 1097)                                           | 304254 (271636 to 352096)     | 757 (673 to 887)                                                | 46118 (33452 to 61797)        | 111 (81 to 147)                                             |
| Iraq                                | 69506 (57147 to 88661)        | 395 (330 to 493)                                            | 112013 (81392 to 162656)      | 958 (692 to 1410)                                               | 15785 (10889 to 22572)        | 132 (90 to 187)                                             |
| Jordan                              | 8955 (7700 to 10433)          | 237 (208 to 272)                                            | 10142 (9672 to 10621)         | 418 (401 to 436)                                                | 1528 (1062 to 2076)           | 62 (43 to 84)                                               |
| Kuwait                              | 12821 (8346 to 22077)         | 670 (448 to 1137)                                           | 8810 (8126 to 9769)           | 622 (583 to 672)                                                | 1316 (926 to 1822)            | 92 (65 to 126)                                              |

1  
2  
3  
4  
5  
6  
7  
8  
9  
10  
11  
12  
13  
14  
15  
16  
17  
18  
19  
20  
21  
22  
23  
24  
25  
26  
27  
28  
29  
30  
31  
32  
33  
34  
35  
36  
37  
38  
39  
40  
41  
42  
43  
44  
45  
46

|                      | Incidence                     |                                                             | Prevalence                    |                                                                 | YLDs                          |                                                             |
|----------------------|-------------------------------|-------------------------------------------------------------|-------------------------------|-----------------------------------------------------------------|-------------------------------|-------------------------------------------------------------|
|                      | Numbers<br>(95% UI)<br>(1990) | Age-standardized<br>rates per 100,000<br>(95% UI)<br>(1990) | Numbers<br>(95% UI)<br>(1990) | Age-standardized<br>estimates per 100,000<br>(95% UI)<br>(1990) | Numbers<br>(95% UI)<br>(1990) | Age-standardized<br>rates per 100,000<br>(95% UI)<br>(1990) |
| Lebanon              | 13842 (10371 to 21079)        | 418 (319 to 615)                                            | 21210 (15217 to 33977)        | 765 (556 to 1213)                                               | 3035 (1991 to 4851)           | 109 (72 to 173)                                             |
| Libya                | 11860 (10255 to 13694)        | 295 (258 to 336)                                            | 15766 (14915 to 16737)        | 562 (536 to 595)                                                | 2352 (1663 to 3166)           | 83 (59 to 112)                                              |
| Morocco              | 70981 (61333 to 82278)        | 281 (245 to 323)                                            | 94093 (89709 to 98896)        | 489 (468 to 512)                                                | 14032 (9792 to 19007)         | 72 (50 to 98)                                               |
| Oman                 | 7324 (6311 to 8515)           | 416 (362 to 477)                                            | 9477 (8971 to 10027)          | 715 (680 to 753)                                                | 1432 (995 to 1957)            | 106 (74 to 144)                                             |
| Palestine            | 8161 (5922 to 12983)          | 373 (278 to 561)                                            | 8972 (6670 to 12759)          | 616 (478 to 842)                                                | 1291 (914 to 1828)            | 88 (64 to 122)                                              |
| Qatar                | 1979 (1696 to 2305)           | 415 (361 to 477)                                            | 2872 (2716 to 3037)           | 735 (702 to 772)                                                | 434 (302 to 599)              | 109 (76 to 149)                                             |
| Saudi Arabia         | 74970 (64447 to 88788)        | 500 (435 to 581)                                            | 89712 (84748 to 94811)        | 853 (813 to 899)                                                | 13403 (9420 to 18276)         | 125 (88 to 170)                                             |
| Sudan                | 59258 (38878 to 101160)       | 289 (195 to 484)                                            | 35193 (31486 to 41234)        | 255 (235 to 287)                                                | 4890 (3454 to 6758)           | 35 (25 to 48)                                               |
| Syrian Arab Republic | 27298 (23322 to 32182)        | 212 (184 to 244)                                            | 32418 (29591 to 37968)        | 382 (353 to 436)                                                | 4817 (3388 to 6570)           | 56 (40 to 76)                                               |
| Tunisia              | 22252 (19108 to 26018)        | 265 (229 to 306)                                            | 31239 (29906 to 32701)        | 477 (458 to 498)                                                | 4665 (3256 to 6345)           | 71 (49 to 96)                                               |
| Turkey               | 141441 (122511 to 163565)     | 236 (205 to 270)                                            | 189610 (181971 to 197914)     | 394 (379 to 411)                                                | 28204 (19754 to 38200)        | 58 (41 to 79)                                               |
| United Arab Emirates | 6539 (5617 to 7609)           | 357 (312 to 410)                                            | 9350 (8869 to 9857)           | 621 (594 to 649)                                                | 1418 (986 to 1951)            | 92 (64 to 125)                                              |

1  
2  
3  
4  
5  
6  
7  
8  
9  
10  
11  
12  
13  
14  
15  
16  
17  
18  
19  
20  
21  
22  
23  
24  
25  
26  
27  
28  
29  
30  
31  
32  
33  
34  
35  
36  
37  
38  
39  
40  
41  
42  
43  
44  
45  
46

|                                    | Incidence                     |                                                             | Prevalence                    |                                                                 | YLDs                          |                                                             |
|------------------------------------|-------------------------------|-------------------------------------------------------------|-------------------------------|-----------------------------------------------------------------|-------------------------------|-------------------------------------------------------------|
|                                    | Numbers<br>(95% UI)<br>(1990) | Age-standardized<br>rates per 100,000<br>(95% UI)<br>(1990) | Numbers<br>(95% UI)<br>(1990) | Age-standardized<br>estimates per 100,000<br>(95% UI)<br>(1990) | Numbers<br>(95% UI)<br>(1990) | Age-standardized<br>rates per 100,000<br>(95% UI)<br>(1990) |
| Yemen                              | 31601 (27106 to 36896)        | 250 (218 to 286)                                            | 36551 (34139 to 39589)        | 441 (417 to 470)                                                | 5412 (3882 to 7267)           | 64 (46 to 87)                                               |
| <b>South Asia</b>                  | 4300736 (3694519 to 4984977)  | 450 (388 to 515)                                            | 5841505 (5539892 to 6167668)  | 750 (714 to 791)                                                | 860069 (604623 to 1163495)    | 109 (77 to 147)                                             |
| <b>South Asia</b>                  | 4300736 (3694519 to 4984977)  | 450 (388 to 515)                                            | 5841505 (5539892 to 6167668)  | 750 (714 to 791)                                                | 860069 (604623 to 1163495)    | 109 (77 to 147)                                             |
| Bangladesh                         | 278929 (238243 to 322617)     | 278 (241 to 319)                                            | 359155 (336447 to 380719)     | 506 (477 to 536)                                                | 53822 (37633 to 73397)        | 75 (52 to 102)                                              |
| Bhutan                             | 1970 (1681 to 2296)           | 348 (302 to 397)                                            | 2432 (2303 to 2574)           | 615 (585 to 648)                                                | 364 (257 to 500)              | 90 (63 to 123)                                              |
| India                              | 3699867 (3165789 to 4285733)  | 499 (431 to 574)                                            | 5052191 (4789672 to 5335687)  | 818 (778 to 863)                                                | 742455 (522650 to 1003627)    | 118 (83 to 160)                                             |
| Nepal                              | 58632 (50978 to 67502)        | 338 (296 to 384)                                            | 74046 (70671 to 78019)        | 559 (535 to 587)                                                | 10938 (7623 to 14857)         | 81 (57 to 110)                                              |
| Pakistan                           | 261338 (223563 to 302917)     | 266 (229 to 305)                                            | 353682 (335994 to 374052)     | 480 (457 to 508)                                                | 52490 (36788 to 71199)        | 70 (49 to 95)                                               |
| <b>Sub-Saharan Africa</b>          | 1537445 (1146016 to 2275614)  | 329 (256 to 461)                                            | 1206309 (1113585 to 1334495)  | 383 (360 to 415)                                                | 172908 (123072 to 233849)     | 54 (39 to 74)                                               |
| <b>Southern Sub-Saharan Africa</b> | 115447 (93813 to 140794)      | 233 (192 to 280)                                            | 133543 (125403 to 142989)     | 364 (342 to 391)                                                | 18861 (13201 to 25332)        | 51 (36 to 68)                                               |
| Botswana                           | 2191 (1767 to 2682)           | 175 (145 to 211)                                            | 2051 (1932 to 2183)           | 242 (229 to 256)                                                | 290 (201 to 397)              | 34 (24 to 46)                                               |
| Eswatini                           | 1290 (1050 to 1590)           | 175 (146 to 211)                                            | 1172 (1107 to 1245)           | 252 (239 to 267)                                                | 166 (116 to 225)              | 35 (24 to 47)                                               |
| Lesotho                            | 2845 (2325 to 3480)           | 164 (137 to 198)                                            | 2806 (2651 to 2978)           | 220 (209 to 232)                                                | 395 (274 to 534)              | 31 (22 to 41)                                               |

1  
2  
3  
4  
5  
6  
7  
8  
9  
10  
11  
12  
13  
14  
15  
16  
17  
18  
19  
20  
21  
22  
23  
24  
25  
26  
27  
28  
29  
30  
31  
32  
33  
34  
35  
36  
37  
38  
39  
40  
41  
42  
43  
44  
45  
46

|                                   | Incidence                     |                                                             | Prevalence                    |                                                                 | YLDs                          |                                                             |
|-----------------------------------|-------------------------------|-------------------------------------------------------------|-------------------------------|-----------------------------------------------------------------|-------------------------------|-------------------------------------------------------------|
|                                   | Numbers<br>(95% UI)<br>(1990) | Age-standardized<br>rates per 100,000<br>(95% UI)<br>(1990) | Numbers<br>(95% UI)<br>(1990) | Age-standardized<br>estimates per 100,000<br>(95% UI)<br>(1990) | Numbers<br>(95% UI)<br>(1990) | Age-standardized<br>rates per 100,000<br>(95% UI)<br>(1990) |
| Namibia                           | 2572 (2114 to 3133)           | 201 (168 to 239)                                            | 3194 (2831 to 3755)           | 332 (299 to 379)                                                | 446 (322 to 597)              | 46 (33 to 61)                                               |
| South Africa                      | 91918 (74258 to 112133)       | 258 (210 to 311)                                            | 110769 (103753 to 118832)     | 406 (380 to 437)                                                | 15640 (10926 to 21082)        | 57 (40 to 76)                                               |
| Zimbabwe                          | 14631 (11818 to 17980)        | 161 (135 to 192)                                            | 13552 (12817 to 14370)        | 229 (217 to 242)                                                | 1923 (1333 to 2632)           | 32 (22 to 43)                                               |
| <b>Western Sub-Saharan Africa</b> | 382027 (311502 to 464214)     | 224 (187 to 269)                                            | 393643 (371506 to 417915)     | 330 (311 to 350)                                                | 56254 (39560 to 76157)        | 47 (33 to 63)                                               |
| Benin                             | 9289 (7594 to 11299)          | 228 (189 to 275)                                            | 9598 (9087 to 10182)          | 353 (334 to 374)                                                | 1374 (955 to 1870)            | 50 (35 to 68)                                               |
| Burkina Faso                      | 17138 (13980 to 20844)        | 219 (181 to 263)                                            | 18263 (17286 to 19378)        | 328 (311 to 348)                                                | 2600 (1819 to 3556)           | 46 (32 to 62)                                               |
| Cabo Verde                        | 609 (496 to 741)              | 184 (152 to 221)                                            | 710 (674 to 749)              | 290 (276 to 307)                                                | 101 (70 to 137)               | 41 (29 to 56)                                               |
| Cameroon                          | 22582 (18328 to 27491)        | 261 (215 to 315)                                            | 26104 (24567 to 27826)        | 422 (400 to 449)                                                | 3755 (2637 to 5061)           | 60 (42 to 81)                                               |
| Chad                              | 13637 (10288 to 19609)        | 250 (194 to 347)                                            | 12524 (11163 to 14614)        | 335 (305 to 379)                                                | 1764 (1273 to 2365)           | 47 (34 to 63)                                               |
| Côte d'Ivoire                     | 24499 (20017 to 29733)        | 246 (205 to 295)                                            | 24357 (22908 to 25937)        | 368 (348 to 389)                                                | 3492 (2397 to 4736)           | 52 (36 to 70)                                               |
| Gambia                            | 1659 (1344 to 2036)           | 196 (163 to 236)                                            | 1701 (1591 to 1821)           | 309 (291 to 328)                                                | 244 (173 to 331)              | 44 (31 to 59)                                               |
| Ghana                             | 31030 (25268 to 37891)        | 235 (193 to 284)                                            | 34864 (32489 to 37234)        | 378 (353 to 402)                                                | 5052 (3515 to 6960)           | 54 (38 to 73)                                               |

1  
2  
3  
4  
5  
6  
7  
8  
910  
11  
12  
13  
14  
15  
16  
17  
18  
19  
20  
21  
22  
23  
24  
25  
26  
27  
28  
29  
30  
31  
32  
33  
34  
35  
36  
37  
38

|                                   | Incidence                     |                                                             | Prevalence                    |                                                                 | YLDs                          |                                                             |
|-----------------------------------|-------------------------------|-------------------------------------------------------------|-------------------------------|-----------------------------------------------------------------|-------------------------------|-------------------------------------------------------------|
|                                   | Numbers<br>(95% UI)<br>(1990) | Age-standardized<br>rates per 100,000<br>(95% UI)<br>(1990) | Numbers<br>(95% UI)<br>(1990) | Age-standardized<br>estimates per 100,000<br>(95% UI)<br>(1990) | Numbers<br>(95% UI)<br>(1990) | Age-standardized<br>rates per 100,000<br>(95% UI)<br>(1990) |
| Guinea                            | 11807 (9667 to 14382)         | 214 (178 to 256)                                            | 13474 (12693 to 14282)        | 331 (313 to 351)                                                | 1931 (1370 to 2598)           | 47 (33 to 63)                                               |
| Guinea-Bissau                     | 2419 (1965 to 2966)           | 273 (224 to 332)                                            | 2499 (2342 to 2669)           | 412 (387 to 438)                                                | 361 (250 to 492)              | 58 (41 to 79)                                               |
| Liberia                           | 19837 (8502 to 45461)         | 987 (444 to 2198)                                           | 5776 (4553 to 8368)           | 390 (327 to 518)                                                | 782 (513 to 1233)             | 53 (36 to 78)                                               |
| Mali                              | 18839 (14989 to 24426)        | 244 (197 to 309)                                            | 17615 (16574 to 18798)        | 326 (307 to 345)                                                | 2508 (1739 to 3419)           | 46 (32 to 62)                                               |
| Mauritania                        | 5543 (4481 to 6780)           | 304 (247 to 368)                                            | 6379 (5995 to 6774)           | 485 (457 to 517)                                                | 926 (640 to 1265)             | 70 (49 to 95)                                               |
| Niger                             | 15116 (12366 to 18488)        | 219 (182 to 262)                                            | 13834 (13043 to 14730)        | 317 (301 to 336)                                                | 1989 (1391 to 2690)           | 45 (31 to 61)                                               |
| Nigeria                           | 159087 (129032 to 196310)     | 198 (163 to 238)                                            | 175736 (165268 to 186733)     | 303 (286 to 321)                                                | 25033 (17488 to 33851)        | 43 (30 to 57)                                               |
| Sao Tome and Principe             | 232 (190 to 285)              | 210 (175 to 252)                                            | 249 (236 to 263)              | 320 (303 to 339)                                                | 36 (25 to 48)                 | 45 (32 to 61)                                               |
| Senegal                           | 14134 (11507 to 17228)        | 215 (179 to 257)                                            | 14364 (13478 to 15318)        | 324 (305 to 344)                                                | 2061 (1436 to 2812)           | 46 (32 to 62)                                               |
| Sierra Leone                      | 6798 (5591 to 8288)           | 209 (172 to 252)                                            | 7733 (7320 to 8213)           | 320 (303 to 339)                                                | 1105 (770 to 1503)            | 45 (32 to 61)                                               |
| Togo                              | 7757 (6242 to 9634)           | 237 (195 to 289)                                            | 7849 (7353 to 8389)           | 381 (357 to 404)                                                | 1138 (798 to 1566)            | 54 (38 to 74)                                               |
| <b>Eastern Sub-Saharan Africa</b> | 915689 (614243 to 1558449)    | 491 (344 to 789)                                            | 546626 (484496 to 643421)     | 451 (413 to 505)                                                | 78366 (56234 to 106623)       | 64 (46 to 86)                                               |
| Burundi                           | 14420 (12357 to 16712)        | 304 (264 to 348)                                            | 16000 (15197 to 16889)        | 459 (438 to 483)                                                | 2385 (1658 to 3269)           | 67 (47 to 92)                                               |
| Comoros                           | 1286 (1046 to 1588)           | 304 (249 to 371)                                            | 1424 (1339 to 1511)           | 479 (452 to 507)                                                | 205 (145 to 279)              | 68 (48 to 93)                                               |

39  
40  
41  
42  
43  
44  
45  
46

1  
2  
3  
4  
5  
6  
7  
8  
9  
10  
11  
12  
13  
14  
15  
16  
17  
18  
19  
20  
21  
22  
23  
24  
25  
26  
27  
28  
29  
30  
31  
32  
33  
34  
35  
36  
37  
38  
39  
40  
41  
42  
43  
44  
45  
46

|             | Incidence                     |                                                             | Prevalence                    |                                                                 | YLDs                          |                                                             |
|-------------|-------------------------------|-------------------------------------------------------------|-------------------------------|-----------------------------------------------------------------|-------------------------------|-------------------------------------------------------------|
|             | Numbers<br>(95% UI)<br>(1990) | Age-standardized<br>rates per 100,000<br>(95% UI)<br>(1990) | Numbers<br>(95% UI)<br>(1990) | Age-standardized<br>estimates per 100,000<br>(95% UI)<br>(1990) | Numbers<br>(95% UI)<br>(1990) | Age-standardized<br>rates per 100,000<br>(95% UI)<br>(1990) |
| Djibouti    | 1450 (1119 to 2040)           | 317 (251 to 421)                                            | 1146 (1071 to 1236)           | 412 (388 to 438)                                                | 166 (114 to 227)              | 59 (41 to 79)                                               |
| Eritrea     | 45882 (18912 to 107796)       | 1411 (622 to 3143)                                          | 17672 (10227 to 30705)        | 775 (498 to 1256)                                               | 2364 (1357 to 4220)           | 104 (65 to 169)                                             |
| Ethiopia    | 533016 (297003 to 1055456)    | 1019 (601 to 1899)                                          | 205144 (172013 to 260669)     | 593 (526 to 692)                                                | 29635 (20754 to 41581)        | 85 (61 to 117)                                              |
| Kenya       | 49374 (42201 to 57573)        | 254 (221 to 290)                                            | 54192 (51282 to 57168)        | 419 (399 to 441)                                                | 8064 (5612 to 10876)          | 61 (43 to 82)                                               |
| Madagascar  | 28238 (22733 to 34714)        | 254 (208 to 309)                                            | 28958 (27086 to 30958)        | 387 (364 to 410)                                                | 4160 (2888 to 5693)           | 55 (38 to 74)                                               |
| Malawi      | 17980 (14480 to 22169)        | 204 (167 to 246)                                            | 17419 (16343 to 18504)        | 294 (277 to 310)                                                | 2499 (1722 to 3363)           | 41 (29 to 56)                                               |
| Mozambique  | 40434 (30166 to 60812)        | 335 (261 to 486)                                            | 44165 (36287 to 58750)        | 501 (426 to 636)                                                | 6159 (4462 to 8610)           | 69 (50 to 96)                                               |
| Rwanda      | 33831 (23013 to 55618)        | 494 (354 to 772)                                            | 22408 (20656 to 25061)        | 500 (469 to 539)                                                | 3202 (2193 to 4400)           | 71 (49 to 96)                                               |
| Somalia     | 27638 (17267 to 51140)        | 405 (266 to 709)                                            | 15940 (13747 to 22257)        | 355 (319 to 454)                                                | 2245 (1540 to 3269)           | 50 (34 to 69)                                               |
| South Sudan | 14422 (11653 to 17614)        | 275 (227 to 332)                                            | 16135 (14910 to 17648)        | 449 (419 to 485)                                                | 2292 (1640 to 3060)           | 63 (45 to 83)                                               |
| Uganda      | 38848 (31013 to 49200)        | 246 (202 to 304)                                            | 40438 (33471 to 53028)        | 380 (327 to 475)                                                | 5627 (4051 to 7768)           | 52 (38 to 71)                                               |



1  
2  
3  
4  
5  
6  
7  
8  
9  
10  
11  
12  
13  
14  
15  
16  
17  
18  
19  
20  
21  
22  
23  
24  
25  
26  
27  
28  
29  
30  
31  
32  
33  
34  
35  
36  
37  
38  
39  
40  
41  
42  
43  
44  
45  
46

|                                   | Incidence                     |                                                             | Prevalence                    |                                                                 | YLDs                          |                                                             |
|-----------------------------------|-------------------------------|-------------------------------------------------------------|-------------------------------|-----------------------------------------------------------------|-------------------------------|-------------------------------------------------------------|
|                                   | Numbers<br>(95% UI)<br>(1990) | Age-standardized<br>rates per 100,000<br>(95% UI)<br>(1990) | Numbers<br>(95% UI)<br>(1990) | Age-standardized<br>estimates per 100,000<br>(95% UI)<br>(1990) | Numbers<br>(95% UI)<br>(1990) | Age-standardized<br>rates per 100,000<br>(95% UI)<br>(1990) |
| United Republic of Tanzania       | 53724 (43604 to 65758)        | 225 (186 to 272)                                            | 52426 (49327 to 55790)        | 331 (313 to 350)                                                | 7487 (5161 to 10080)          | 47 (32 to 64)                                               |
| Zambia                            | 14474 (11753 to 17785)        | 201 (168 to 241)                                            | 12756 (11996 to 13624)        | 279 (265 to 296)                                                | 1817 (1268 to 2473)           | 39 (27 to 53)                                               |
| <b>Central Sub-Saharan Africa</b> | 124283 (103595 to 154993)     | 244 (207 to 294)                                            | 132497 (122290 to 145589)     | 367 (344 to 396)                                                | 19427 (14018 to 26234)        | 53 (38 to 71)                                               |
| Angola                            | 39241 (27108 to 66030)        | 382 (278 to 599)                                            | 35168 (27673 to 46702)        | 482 (401 to 604)                                                | 5060 (3578 to 6975)           | 69 (50 to 93)                                               |
| Central African Republic          | 4641 (4002 to 5348)           | 192 (167 to 218)                                            | 5137 (4892 to 5410)           | 286 (273 to 300)                                                | 759 (532 to 1029)             | 41 (29 to 56)                                               |
| Congo                             | 4611 (3977 to 5326)           | 216 (188 to 245)                                            | 5269 (5019 to 5530)           | 336 (320 to 352)                                                | 783 (546 to 1064)             | 49 (34 to 67)                                               |
| Democratic Republic of the Congo  | 72855 (62741 to 84539)        | 213 (186 to 243)                                            | 83247 (79033 to 87924)        | 343 (327 to 361)                                                | 12283 (8662 to 16696)         | 50 (35 to 67)                                               |
| Equatorial Guinea                 | 766 (659 to 879)              | 200 (173 to 225)                                            | 853 (813 to 896)              | 305 (291 to 320)                                                | 126 (88 to 169)               | 44 (31 to 59)                                               |
| Gabon                             | 2170 (1871 to 2497)           | 243 (211 to 276)                                            | 2823 (2700 to 2962)           | 400 (383 to 420)                                                | 418 (293 to 569)              | 59 (41 to 79)                                               |

Abbreviations: YLDs, years lived with disability; UI, uncertainty interval

1  
2  
3  
4  
5  
6  
7  
8  
9  
10  
11  
12  
13  
14  
15  
16  
17  
18  
19  
20  
21  
22  
23  
24  
25  
26  
27  
28  
29  
30  
31  
32  
33  
34  
35  
36  
37  
38  
39  
40  
41  
42  
43  
44  
45  
46**Table 9. Years lived with disability for 2019 and percentage changes of age-standardized rates by location for spinal cord injury, 1990–2019**

|                                  | YLDs                         |                                                          |                                                                        |
|----------------------------------|------------------------------|----------------------------------------------------------|------------------------------------------------------------------------|
|                                  | Numbers (95% UI)<br>(2019)   | Age-standardized rates per 100,000<br>(95% UI)<br>(2019) | Percentage change of age-standardized rates<br>(95% UI)<br>(1990–2019) |
| <b>Global</b>                    | 6200809 (4465317 to 8156193) | 76 (55 to 100)                                           | -1.5% (-5.6% to 3.3%)                                                  |
| <b>High-income</b>               | 1210171 (857173 to 1553079)  | 84 (59 to 108)                                           | -2.8% (-4.7% to -1.1%)                                                 |
| <b>High-income North America</b> | 543327 (382768 to 696793)    | 113 (80 to 146)                                          | -7.7% (-10.4% to -4.8%)                                                |
| Canada                           | 27394 (19406 to 35536)       | 54 (38 to 70)                                            | 0.8% (-7.1% to 9.1%)                                                   |
| Greenland                        | 91 (64 to 116)               | 139 (98 to 176)                                          | -17.6% (-22% to -12.8%)                                                |
| United States of America         | 515833 (364639 to 661820)    | 120 (85 to 155)                                          | -7.8% (-10.6% to -4.8%)                                                |
| <b>Australasia</b>               | 33799 (23765 to 44013)       | 97 (68 to 127)                                           | 6.7% (0.8% to 13%)                                                     |
| Australia                        | 27954 (19462 to 36495)       | 95 (66 to 124)                                           | 7% (-0.2% to 14.6%)                                                    |
| New Zealand                      | 5845 (4127 to 7620)          | 109 (77 to 143)                                          | 6.5% (0% to 13.5%)                                                     |
| <b>High-income Asia Pacific</b>  | 226816 (161070 to 292262)    | 83 (58 to 107)                                           | -5.3% (-7.9% to -2.6%)                                                 |
| Brunei Darussalam                | 234 (164 to 302)             | 50 (35 to 65)                                            | -12.6% (-19.7% to -5.1%)                                               |
| Japan                            | 177770 (125301 to 229752)    | 93 (66 to 121)                                           | -0.8% (-3.5% to 1.9%)                                                  |
| Republic of Korea                | 44931 (31441 to 58697)       | 62 (43 to 81)                                            | -4.5% (-12.2% to 4.1%)                                                 |
| Singapore                        | 3881 (2727 to 5081)          | 53 (37 to 70)                                            | 0.4% (-8.2% to 9.1%)                                                   |
| <b>Western Europe</b>            | 362292 (259168 to 466837)    | 63 (45 to 82)                                            | 1.4% (-2.3% to 5.2%)                                                   |
| Andorra                          | 76 (54 to 99)                | 67 (48 to 88)                                            | 6.5% (-2.1% to 15.3%)                                                  |
| Austria                          | 7418 (5264 to 9570)          | 63 (44 to 81)                                            | -2.6% (-10.4% to 6.2%)                                                 |
| Belgium                          | 10894 (7676 to 14182)        | 72 (51 to 95)                                            | 10.9% (1.9% to 20.4%)                                                  |
| Cyprus                           | 943 (661 to 1242)            | 59 (41 to 78)                                            | 3.9% (-4.9% to 13.6%)                                                  |
| Denmark                          | 4168 (2926 to 5448)          | 58 (40 to 75)                                            | 0% (-9.2% to 10.4%)                                                    |

1  
2  
3  
4  
5  
6  
7  
8  
9  
10  
11  
12  
13  
14  
15  
16  
17  
18  
19  
20  
21  
22  
23  
24  
25  
26  
27  
28  
29  
30  
31  
32  
33  
34  
35  
36  
37  
38  
39  
40  
41  
42  
43  
44  
45  
46

|                               | YLDs                       |                                                          |                                                                        |
|-------------------------------|----------------------------|----------------------------------------------------------|------------------------------------------------------------------------|
|                               | Numbers (95% UI)<br>(2019) | Age-standardized rates per 100,000<br>(95% UI)<br>(2019) | Percentage change of age-standardized rates<br>(95% UI)<br>(1990–2019) |
| Finland                       | 6140 (4337 to 8023)        | 85 (59 to 112)                                           | 3.1% (-5% to 12.3%)                                                    |
| France                        | 58574 (41243 to 76394)     | 67 (47 to 88)                                            | 0.9% (-7% to 9.7%)                                                     |
| Germany                       | 65939 (46825 to 86203)     | 58 (40 to 76)                                            | 4.3% (-4.6% to 13.4%)                                                  |
| Greece                        | 7380 (5230 to 9569)        | 55 (39 to 73)                                            | -5% (-13.1% to 3.3%)                                                   |
| Iceland                       | 247 (175 to 324)           | 60 (42 to 80)                                            | 4% (-4.8% to 13.7%)                                                    |
| Ireland                       | 3395 (2405 to 4422)        | 59 (42 to 77)                                            | 8.3% (-0.6% to 17.8%)                                                  |
| Israel                        | 6892 (4598 to 10405)       | 73 (48 to 111)                                           | 33.1% (8.1% to 83.4%)                                                  |
| Italy                         | 44023 (31605 to 56655)     | 52 (37 to 68)                                            | -10.7% (-13.9% to -6.8%)                                               |
| Luxembourg                    | 495 (353 to 644)           | 64 (45 to 83)                                            | -2.4% (-10.8% to 5.8%)                                                 |
| Malta                         | 370 (261 to 483)           | 65 (46 to 86)                                            | 12.7% (3.7% to 23.3%)                                                  |
| Monaco                        | 67 (47 to 88)              | 132 (91 to 177)                                          | 13.9% (6.8% to 21.4%)                                                  |
| Netherlands                   | 11974 (8526 to 15625)      | 52 (37 to 68)                                            | 10.1% (0.5% to 19.8%)                                                  |
| Norway                        | 9426 (6643 to 12304)       | 134 (94 to 177)                                          | 3.8% (0.3% to 7.8%)                                                    |
| Portugal                      | 6283 (4459 to 8202)        | 43 (30 to 56)                                            | -31.5% (-39.4% to -24.1%)                                              |
| San Marino                    | 58 (40 to 76)              | 137 (95 to 181)                                          | 10.7% (3.9% to 18%)                                                    |
| Spain                         | 34473 (24458 to 44862)     | 57 (40 to 75)                                            | 6.1% (-4.5% to 17.5%)                                                  |
| Sweden                        | 18973 (13417 to 24808)     | 139 (96 to 184)                                          | 5.6% (-0.2% to 11.3%)                                                  |
| Switzerland                   | 8610 (6048 to 11261)       | 74 (51 to 97)                                            | -8.2% (-15.9% to -0.1%)                                                |
| United Kingdom                | 55158 (39439 to 71101)     | 65 (46 to 85)                                            | 4% (0.7% to 7.2%)                                                      |
| <b>Southern Latin America</b> | 43936 (31118 to 56649)     | 60 (42 to 78)                                            | -4.8% (-14.1% to 2.9%)                                                 |
| Argentina                     | 29214 (20449 to 37642)     | 60 (42 to 78)                                            | -7.3% (-19.2% to 3.5%)                                                 |
| Chile                         | 12222 (8740 to 15961)      | 59 (42 to 76)                                            | 1.4% (-7.4% to 10.5%)                                                  |
| Uruguay                       | 2499 (1787 to 3231)        | 64 (46 to 83)                                            | -3.2% (-11.3% to 6.3%)                                                 |

1  
2  
3  
4  
5  
6  
7  
8  
9  
10  
11  
12  
13  
14  
15  
16  
17  
18  
19  
20  
21  
22  
23  
24  
25  
26  
27  
28  
29  
30  
31  
32  
33  
34  
35  
36  
37  
38  
39  
40  
41  
42  
43  
44  
45  
46

|                                                         | YLDs                      |                                    |                                             |
|---------------------------------------------------------|---------------------------|------------------------------------|---------------------------------------------|
|                                                         | Numbers (95% UI)          | Age-standardized rates per 100,000 | Percentage change of age-standardized rates |
|                                                         | (2019)                    | (95% UI)<br>(2019)                 | (95% UI)<br>(1990–2019)                     |
| <b>Central Europe, Eastern Europe, and Central Asia</b> | 407384 (290705 to 526194) | 82 (58 to 106)                     | -18% (-21.9% to -10.7%)                     |
| <b>Eastern Europe</b>                                   | 219534 (156030 to 282875) | 85 (60 to 109)                     | -21.4% (-25.1% to -15.4%)                   |
| Belarus                                                 | 9342 (6561 to 12215)      | 78 (55 to 102)                     | -17.1% (-23.2% to -11.3%)                   |
| Estonia                                                 | 1225 (867 to 1610)        | 74 (52 to 97)                      | -31.1% (-36.6% to -25.5%)                   |
| Latvia                                                  | 1823 (1280 to 2382)       | 75 (52 to 98)                      | -35.2% (-40.3% to -29.8%)                   |
| Lithuania                                               | 3002 (2125 to 3902)       | 82 (57 to 107)                     | -23.5% (-29.2% to -17.6%)                   |
| Republic of Moldova                                     | 3227 (2279 to 4171)       | 71 (50 to 92)                      | -21.1% (-27.6% to -14.2%)                   |
| Russian Federation                                      | 156702 (111813 to 202955) | 87 (62 to 112)                     | -21.5% (-25.9% to -15%)                     |
| Ukraine                                                 | 44214 (31275 to 57074)    | 82 (58 to 106)                     | -21% (-27.4% to -13.3%)                     |
| <b>Central Europe</b>                                   | 132314 (94264 to 171655)  | 92 (65 to 119)                     | -8.4% (-13% to -2%)                         |
| Albania                                                 | 3007 (2094 to 3962)       | 93 (65 to 123)                     | -6.2% (-15.9% to 8.6%)                      |
| Bosnia and Herzegovina                                  | 6377 (3687 to 12037)      | 156 (90 to 302)                    | 54.5% (11.7% to 130.8%)                     |
| Bulgaria                                                | 7357 (5223 to 9532)       | 86 (61 to 112)                     | -12.6% (-19% to -6.2%)                      |
| Croatia                                                 | 5690 (4019 to 7402)       | 102 (73 to 134)                    | 3.4% (-5.4% to 16.5%)                       |
| Czechia                                                 | 13522 (9535 to 17554)     | 99 (70 to 130)                     | -5.7% (-11.9% to 1.4%)                      |
| Hungary                                                 | 10581 (7521 to 13774)     | 85 (60 to 112)                     | -13.9% (-20.6% to -6.4%)                    |
| Montenegro                                              | 657 (462 to 856)          | 88 (62 to 115)                     | -2.5% (-8.6% to 4.4%)                       |
| North Macedonia                                         | 2107 (1487 to 2725)       | 81 (57 to 105)                     | -1.1% (-9.3% to 7.5%)                       |
| Poland                                                  | 43601 (30773 to 56420)    | 89 (63 to 115)                     | -11.1% (-15.6% to -6.8%)                    |
| Romania                                                 | 19666 (14015 to 25656)    | 82 (58 to 107)                     | -21.2% (-27.4% to -14.7%)                   |
| Serbia                                                  | 10185 (7050 to 14487)     | 98 (67 to 141)                     | 9.4% (-8.5% to 47%)                         |
| Slovakia                                                | 6544 (4662 to 8499)       | 95 (67 to 123)                     | -4.8% (-11.4% to 2%)                        |

1  
2  
3  
4  
5  
6  
7  
8  
9  
10  
11  
12  
13  
14  
15  
16  
17  
18  
19  
20  
21  
22  
23  
24  
25  
26  
27  
28  
29  
30  
31  
32  
33  
34  
35  
36  
37  
38  
39  
40  
41  
42  
43  
44  
45  
46

|                                    | YLDs                       |                                                          |                                                                        |
|------------------------------------|----------------------------|----------------------------------------------------------|------------------------------------------------------------------------|
|                                    | Numbers (95% UI)<br>(2019) | Age-standardized rates per 100,000<br>(95% UI)<br>(2019) | Percentage change of age-standardized rates<br>(95% UI)<br>(1990–2019) |
| Slovenia                           | 3019 (2147 to 3976)        | 109 (77 to 143)                                          | -6.7% (-12.9% to -0.5%)                                                |
| <b>Central Asia</b>                | 55536 (39430 to 73018)     | 58 (42 to 76)                                            | -8.1% (-16.7% to 8%)                                                   |
| Armenia                            | 2673 (1793 to 3841)        | 76 (52 to 108)                                           | -51.6% (-60% to -40.6%)                                                |
| Azerbaijan                         | 6274 (4363 to 8767)        | 54 (38 to 75)                                            | 0.7% (-14.3% to 25.7%)                                                 |
| Georgia                            | 3053 (2133 to 4063)        | 73 (50 to 98)                                            | 18.4% (2.9% to 47.1%)                                                  |
| Kazakhstan                         | 11569 (8175 to 14962)      | 60 (42 to 78)                                            | -9.5% (-17.4% to -1.5%)                                                |
| Kyrgyzstan                         | 3234 (2302 to 4195)        | 52 (37 to 67)                                            | -14.5% (-22.7% to -5.2%)                                               |
| Mongolia                           | 2105 (1497 to 2698)        | 60 (43 to 77)                                            | 8.6% (-1.2% to 18.7%)                                                  |
| Tajikistan                         | 7748 (4353 to 15772)       | 88 (50 to 175)                                           | 51.2% (-5.1% to 195.3%)                                                |
| Turkmenistan                       | 2455 (1756 to 3185)        | 48 (35 to 62)                                            | -2.9% (-13.2% to 10.6%)                                                |
| Uzbekistan                         | 16425 (11580 to 21093)     | 49 (35 to 63)                                            | -6.8% (-15.5% to 2.3%)                                                 |
| <b>Latin America and Caribbean</b> | 502465 (360265 to 641612)  | 82 (59 to 105)                                           | -16.8% (-23.3% to -11.6%)                                              |
| <b>Central Latin America</b>       | 200134 (142895 to 262800)  | 79 (56 to 103)                                           | -28.2% (-36.5% to -22.5%)                                              |
| Colombia                           | 30489 (20572 to 44447)     | 60 (40 to 87)                                            | -20.9% (-31.5% to -5.8%)                                               |
| Costa Rica                         | 2299 (1621 to 3010)        | 45 (32 to 59)                                            | -1.7% (-9.7% to 6.7%)                                                  |
| El Salvador                        | 7025 (3524 to 16079)       | 117 (58 to 272)                                          | -58.1% (-65.7% to -38.1%)                                              |
| Guatemala                          | 10479 (6703 to 18661)      | 69 (43 to 127)                                           | -46.5% (-61.2% to -19%)                                                |
| Honduras                           | 4760 (3333 to 6327)        | 54 (38 to 72)                                            | 18.6% (2.3% to 42.6%)                                                  |
| Mexico                             | 120381 (86536 to 154329)   | 94 (68 to 121)                                           | -23.5% (-26.3% to -20.8%)                                              |
| Nicaragua                          | 7105 (3061 to 17891)       | 122 (51 to 309)                                          | -56.3% (-62.6% to -38.9%)                                              |
| Panama                             | 1936 (1346 to 2667)        | 46 (32 to 63)                                            | -15.1% (-33.7% to -0.8%)                                               |
| Venezuela (Bolivarian Republic of) | 15660 (11076 to 20541)     | 53 (37 to 69)                                            | -4.6% (-14.9% to 8%)                                                   |
| <b>Andean Latin America</b>        | 26820 (18760 to 38361)     | 43 (30 to 62)                                            | -17.2% (-29.5% to -6.2%)                                               |

1  
2  
3  
4  
5  
6  
7  
8  
9  
10  
11  
12  
13  
14  
15  
16  
17  
18  
19  
20  
21  
22  
23  
24  
25  
26  
27  
28  
29  
30  
31  
32  
33  
34  
35  
36  
37  
38  
39  
40  
41  
42  
43  
44  
45  
46

|                                  | YLDs                       |                                                          |                                                                        |
|----------------------------------|----------------------------|----------------------------------------------------------|------------------------------------------------------------------------|
|                                  | Numbers (95% UI)<br>(2019) | Age-standardized rates per 100,000<br>(95% UI)<br>(2019) | Percentage change of age-standardized rates<br>(95% UI)<br>(1990–2019) |
| Bolivia (Plurinational State of) | 3779 (2690 to 4811)        | 34 (24 to 44)                                            | -4.1% (-14.5% to 7.3%)                                                 |
| Ecuador                          | 7139 (5143 to 9248)        | 42 (30 to 54)                                            | -10.4% (-20.6% to 0.7%)                                                |
| Peru                             | 15903 (10527 to 25226)     | 46 (31 to 73)                                            | -21.7% (-35.3% to -6.6%)                                               |
| <b>Caribbean</b>                 | 38262 (24729 to 57334)     | 78 (50 to 117)                                           | 66% (24.4% to 140%)                                                    |
| Antigua and Barbuda              | 39 (28 to 51)              | 39 (28 to 50)                                            | 7% (-3.7% to 18.9%)                                                    |
| Bahamas                          | 158 (113 to 204)           | 38 (27 to 49)                                            | 7.3% (-4.3% to 19.8%)                                                  |
| Barbados                         | 124 (89 to 159)            | 35 (25 to 45)                                            | 2.7% (-8.5% to 14.3%)                                                  |
| Belize                           | 173 (126 to 226)           | 45 (33 to 58)                                            | 8.6% (-1.2% to 19.7%)                                                  |
| Bermuda                          | 69 (49 to 89)              | 81 (58 to 105)                                           | 7% (-1.8% to 16.5%)                                                    |
| Cuba                             | 6504 (4662 to 8469)        | 45 (32 to 59)                                            | -2.1% (-10.9% to 8.4%)                                                 |
| Dominica                         | 32 (23 to 42)              | 42 (30 to 54)                                            | 15.1% (-0.4% to 32.9%)                                                 |
| Dominican Republic               | 4755 (3410 to 6125)        | 44 (32 to 57)                                            | 15.7% (4.1% to 28.6%)                                                  |
| Grenada                          | 48 (33 to 62)              | 42 (30 to 56)                                            | -13.7% (-40% to 12.3%)                                                 |
| Guyana                           | 328 (235 to 416)           | 43 (30 to 54)                                            | 10.3% (-1.2% to 22.8%)                                                 |
| Haiti                            | 18498 (8950 to 34403)      | 158 (77 to 294)                                          | 354.7% (143.5% to 723.4%)                                              |
| Jamaica                          | 1076 (769 to 1376)         | 36 (26 to 46)                                            | -5.2% (-16.3% to 5.6%)                                                 |
| Puerto Rico                      | 4044 (2883 to 5316)        | 88 (62 to 116)                                           | 1.7% (-7.9% to 14.7%)                                                  |
| Saint Kitts and Nevis            | 50 (35 to 64)              | 74 (52 to 96)                                            | 9.5% (-1.6% to 21.3%)                                                  |
| Saint Lucia                      | 78 (57 to 100)             | 39 (28 to 50)                                            | 6.4% (-4.5% to 18.9%)                                                  |
| Saint Vincent and the Grenadines | 47 (33 to 60)              | 38 (27 to 48)                                            | 8.8% (-2.7% to 22.4%)                                                  |
| Suriname                         | 249 (178 to 326)           | 41 (29 to 54)                                            | -8.7% (-31.4% to 7.7%)                                                 |
| Trinidad and Tobago              | 606 (436 to 779)           | 38 (27 to 49)                                            | 8% (-4% to 21%)                                                        |
| United States Virgin Islands     | 88 (63 to 113)             | 70 (50 to 90)                                            | -12.5% (-19.5% to -4.7%)                                               |

1  
2  
3  
4  
5  
6  
7  
8  
9  
10  
11  
12  
13  
14  
15  
16  
17  
18  
19  
20  
21  
22  
23  
24  
25  
26  
27  
28  
29  
30  
31  
32  
33  
34  
35  
36  
37  
38  
39  
40  
41  
42  
43  
44  
45  
46

|                                               | YLDs                         |                                                          |                                                                        |
|-----------------------------------------------|------------------------------|----------------------------------------------------------|------------------------------------------------------------------------|
|                                               | Numbers (95% UI)<br>(2019)   | Age-standardized rates per 100,000<br>(95% UI)<br>(2019) | Percentage change of age-standardized rates<br>(95% UI)<br>(1990–2019) |
| <b>Tropical Latin America</b>                 | 237248 (169890 to 302343)    | 97 (69 to 124)                                           | -12.9% (-16.6% to -9%)                                                 |
| Brazil                                        | 234431 (167899 to 298702)    | 98 (70 to 126)                                           | -12.8% (-16.6% to -8.8%)                                               |
| Paraguay                                      | 2818 (2022 to 3605)          | 42 (30 to 53)                                            | -9.7% (-19% to 0.3%)                                                   |
| <b>Southeast Asia, East Asia, and Oceania</b> | 1805371 (1289643 to 2309733) | 69 (50 to 89)                                            | 6.6% (0.1% to 12.2%)                                                   |
| <b>East Asia</b>                              | 1388823 (979243 to 1793841)  | 72 (51 to 94)                                            | 11.1% (5% to 16.9%)                                                    |
| China                                         | 1373726 (968118 to 1774815)  | 74 (52 to 96)                                            | 11.4% (5.2% to 17.3%)                                                  |
| Democratic People's Republic of Korea         | 7008 (5007 to 9073)          | 23 (16 to 29)                                            | -5.3% (-16.1% to 6.9%)                                                 |
| Taiwan (Province of China)                    | 8089 (5746 to 10379)         | 25 (18 to 32)                                            | -19.9% (-28.7% to -10.2%)                                              |
| <b>Southeast Asia</b>                         | 412470 (297995 to 546543)    | 59 (43 to 77)                                            | -9.3% (-22.4% to -0.7%)                                                |
| Cambodia                                      | 10238 (5454 to 22190)        | 67 (35 to 146)                                           | -51.2% (-67.5% to -7.9%)                                               |
| Indonesia                                     | 210217 (153290 to 266273)    | 79 (57 to 99)                                            | -11.5% (-17.9% to -6%)                                                 |
| Lao People's Democratic Republic              | 2208 (1612 to 2785)          | 34 (25 to 43)                                            | -0.3% (-11.3% to 13%)                                                  |
| Malaysia                                      | 11627 (8356 to 15152)        | 36 (26 to 47)                                            | -1% (-11.4% to 9.7%)                                                   |
| Maldives                                      | 164 (116 to 219)             | 32 (23 to 42)                                            | 12% (-3% to 28.5%)                                                     |
| Mauritius                                     | 1072 (778 to 1385)           | 69 (50 to 89)                                            | 16.5% (6.5% to 28.1%)                                                  |
| Myanmar                                       | 33553 (21725 to 50386)       | 61 (40 to 90)                                            | 21.5% (-27.4% to 83.6%)                                                |
| Philippines                                   | 43970 (30346 to 63181)       | 43 (30 to 61)                                            | -16.1% (-31.3% to -5.4%)                                               |
| Seychelles                                    | 81 (58 to 104)               | 70 (50 to 89)                                            | 4.2% (-5.1% to 13.7%)                                                  |
| Sri Lanka                                     | 24070 (12260 to 51620)       | 102 (51 to 222)                                          | 58.3% (18.7% to 104.8%)                                                |
| Thailand                                      | 31982 (23052 to 41443)       | 36 (26 to 47)                                            | -18.5% (-27.3% to -8.7%)                                               |

1  
2  
3  
4  
5  
6  
7  
8  
9  
10  
11  
12  
13  
14  
15  
16  
17  
18  
19  
20  
21  
22  
23  
24  
25  
26  
27  
28  
29  
30  
31  
32  
33  
34  
35  
36  
37  
38  
39  
40  
41  
42  
43  
44  
45  
46

|                                     | YLDs                          |                                                          |                                                                        |
|-------------------------------------|-------------------------------|----------------------------------------------------------|------------------------------------------------------------------------|
|                                     | Numbers (95% UI)<br>(2019)    | Age-standardized rates per 100,000<br>(95% UI)<br>(2019) | Percentage change of age-standardized rates<br>(95% UI)<br>(1990–2019) |
| Timor-Leste                         | 1479 (569 to 3897)            | 143 (55 to 377)                                          | -13.8% (-21% to -3.4%)                                                 |
| Viet Nam                            | 41271 (29846 to 53245)        | 39 (28 to 50)                                            | 10.7% (-0.9% to 22.5%)                                                 |
| <b>Oceania</b>                      | 4077 (2923 to 5215)           | 36 (26 to 46)                                            | 21.8% (9.6% to 35.9%)                                                  |
| American Samoa                      | 37 (27 to 48)                 | 70 (50 to 90)                                            | 9.8% (-1.8% to 25.5%)                                                  |
| Cook Islands                        | 15 (10 to 19)                 | 72 (50 to 93)                                            | 2.5% (-8.3% to 14.2%)                                                  |
| Fiji                                | 261 (188 to 336)              | 28 (21 to 37)                                            | 9% (-2.8% to 23.3%)                                                    |
| Guam                                | 119 (85 to 153)               | 66 (48 to 85)                                            | 1.8% (-6.7% to 10.4%)                                                  |
| Kiribati                            | 24 (18 to 32)                 | 22 (16 to 29)                                            | 13.4% (-3.8% to 34.3%)                                                 |
| Marshall Islands                    | 15 (11 to 20)                 | 28 (21 to 36)                                            | 2.3% (-8.9% to 13.9%)                                                  |
| Micronesia (Federated States of)    | 29 (21 to 37)                 | 30 (22 to 39)                                            | 9.9% (-3.7% to 25%)                                                    |
| Nauru                               | 5 (4 to 7)                    | 58 (42 to 76)                                            | 9.8% (-1.2% to 21.3%)                                                  |
| Niue                                | 1 (1 to 1)                    | 62 (45 to 81)                                            | 17.5% (4.5% to 32%)                                                    |
| Northern Mariana Islands            | 36 (26 to 47)                 | 70 (51 to 91)                                            | -1.5% (-9.6% to 7.2%)                                                  |
| Palau                               | 17 (12 to 22)                 | 78 (56 to 101)                                           | 9% (-2.3% to 21.4%)                                                    |
| Papua New Guinea                    | 2956 (2106 to 3811)           | 36 (26 to 46)                                            | 29.8% (12.9% to 50.1%)                                                 |
| Samoa                               | 79 (54 to 108)                | 42 (29 to 57)                                            | 44.1% (19% to 79.9%)                                                   |
| Solomon Islands                     | 175 (126 to 225)              | 32 (23 to 41)                                            | 7.7% (-5.6% to 21.6%)                                                  |
| Tokelau                             | 1 (1 to 1)                    | 60 (43 to 77)                                            | 13.5% (2% to 25.3%)                                                    |
| Tonga                               | 25 (18 to 32)                 | 27 (20 to 36)                                            | 1.7% (-11.3% to 16.3%)                                                 |
| Tuvalu                              | 6 (5 to 8)                    | 56 (41 to 72)                                            | 13.4% (1.5% to 27%)                                                    |
| Vanuatu                             | 84 (59 to 112)                | 33 (24 to 44)                                            | 15.3% (0.2% to 31.9%)                                                  |
| <b>North Africa and Middle East</b> | 564189 (289631 to<br>1229092) | 92 (48 to 199)                                           | -5.4% (-27.6% to 12.3%)                                                |



1  
2  
3  
4  
5  
6  
7  
8  
9  
10  
11  
12  
13  
14  
15  
16  
17  
18  
19  
20  
21  
22  
23  
24  
25  
26  
27  
28  
29  
30  
31  
32  
33  
34  
35  
36  
37  
38  
39  
40  
41  
42  
43  
44  
45  
46

|                                     | YLDs                       |                                                          |                                                                        |
|-------------------------------------|----------------------------|----------------------------------------------------------|------------------------------------------------------------------------|
|                                     | Numbers (95% UI)<br>(2019) | Age-standardized rates per 100,000<br>(95% UI)<br>(2019) | Percentage change of age-standardized rates<br>(95% UI)<br>(1990–2019) |
| <b>North Africa and Middle East</b> | 564189 (289631 to 1229092) | 92 (48 to 199)                                           | -5.4% (-27.6% to 12.3%)                                                |
| Afghanistan                         | 98889 (26400 to 287537)    | 342 (87 to 1016)                                         | -50.7% (-67.5% to 33%)                                                 |
| Algeria                             | 21542 (14186 to 32871)     | 50 (33 to 76)                                            | 12.2% (-11.6% to 62.6%)                                                |
| Bahrain                             | 716 (501 to 939)           | 39 (28 to 51)                                            | -2.1% (-13.7% to 11.7%)                                                |
| Egypt                               | 28971 (20531 to 37521)     | 31 (22 to 40)                                            | 0.7% (-11.7% to 16.9%)                                                 |
| Iran (Islamic Republic of)          | 58925 (36923 to 97182)     | 63 (40 to 102)                                           | -48.3% (-62.5% to -29.6%)                                              |
| Iraq                                | 106419 (35020 to 295453)   | 265 (90 to 729)                                          | -28.6% (-37.1% to -18.4%)                                              |
| Jordan                              | 3679 (2567 to 4814)        | 34 (24 to 45)                                            | -3.2% (-14.6% to 11.5%)                                                |
| Kuwait                              | 2655 (1727 to 4220)        | 52 (34 to 80)                                            | 4.4% (-10.2% to 21%)                                                   |
| Lebanon                             | 7227 (2416 to 20570)       | 135 (45 to 386)                                          | -58.1% (-63.8% to -41.5%)                                              |
| Libya                               | 7366 (3820 to 15730)       | 100 (52 to 215)                                          | 67.9% (21.6% to 123.9%)                                                |
| Morocco                             | 15820 (11427 to 20411)     | 43 (31 to 55)                                            | -9.1% (-21.4% to 2.7%)                                                 |
| Oman                                | 2116 (1481 to 2770)        | 44 (31 to 58)                                            | -7.8% (-17.9% to 4.1%)                                                 |
| Palestine                           | 13321 (4255 to 37063)      | 309 (100 to 843)                                         | 9.3% (-5.8% to 17.9%)                                                  |
| Qatar                               | 1525 (1072 to 2024)        | 47 (33 to 61)                                            | -17.5% (-26.8% to -8.3%)                                               |
| Saudi Arabia                        | 28027 (19946 to 36763)     | 71 (50 to 92)                                            | 6.2% (-3.8% to 16.6%)                                                  |
| Sudan                               | 31938 (20436 to 55444)     | 96 (63 to 164)                                           | 22.2% (5.5% to 42.6%)                                                  |
| Syrian Arab Republic                | 56665 (16102 to 159728)    | 403 (113 to 1150)                                        | 579.2% (218.2% to 1263.6%)                                             |
| Tunisia                             | 4717 (3406 to 6139)        | 37 (26 to 48)                                            | -5.7% (-16% to 5.6%)                                                   |
| Turkey                              | 40162 (27330 to 56767)     | 44 (30 to 62)                                            | 24.2% (3.7% to 55.5%)                                                  |
| United Arab Emirates                | 5464 (3826 to 7080)        | 43 (31 to 55)                                            | -11.1% (-21.3% to -1.1%)                                               |
| Yemen                               | 27471 (12186 to 66369)     | 101 (46 to 238)                                          | 70.7% (18.8% to 131.1%)                                                |

1  
2  
3  
4  
5  
6  
7  
8  
9  
10  
11  
12  
13  
14  
15  
16  
17  
18  
19  
20  
21  
22  
23  
24  
25  
26  
27  
28  
29  
30  
31  
32  
33  
34  
35  
36  
37  
38  
39  
40  
41  
42  
43  
44  
45  
46

|                                    | YLDs                        |                                                          |                                                                        |
|------------------------------------|-----------------------------|----------------------------------------------------------|------------------------------------------------------------------------|
|                                    | Numbers (95% UI)<br>(2019)  | Age-standardized rates per 100,000<br>(95% UI)<br>(2019) | Percentage change of age-standardized rates<br>(95% UI)<br>(1990–2019) |
| <b>South Asia</b>                  | 1076209 (779951 to 1354932) | 63 (46 to 79)                                            | 11.9% (7.6% to 17%)                                                    |
| <b>South Asia</b>                  | 1076209 (779951 to 1354932) | 63 (46 to 79)                                            | 11.9% (7.6% to 17%)                                                    |
| Bangladesh                         | 77231 (55316 to 100459)     | 50 (36 to 64)                                            | 24% (11% to 38.2%)                                                     |
| Bhutan                             | 399 (292 to 506)            | 55 (40 to 69)                                            | 22.8% (10.6% to 37.1%)                                                 |
| India                              | 887447 (644356 to 1112943)  | 66 (48 to 82)                                            | 8% (4.1% to 11.6%)                                                     |
| Nepal                              | 18091 (12597 to 24724)      | 64 (45 to 87)                                            | 37.6% (17.1% to 70.8%)                                                 |
| Pakistan                           | 93040 (65998 to 127413)     | 51 (36 to 67)                                            | 42.7% (25.2% to 72.6%)                                                 |
| <b>Sub-Saharan Africa</b>          | 635020 (432096 to 1003966)  | 77 (54 to 119)                                           | 3.6% (-1% to 8%)                                                       |
| <b>Southern Sub-Saharan Africa</b> | 41857 (29959 to 52588)      | 56 (40 to 71)                                            | -25.2% (-30.8% to -21.5%)                                              |
| Botswana                           | 1274 (907 to 1617)          | 57 (41 to 72)                                            | 1.6% (-7.7% to 11%)                                                    |
| Eswatini                           | 514 (364 to 646)            | 52 (37 to 65)                                            | -9% (-17.2% to -1%)                                                    |
| Lesotho                            | 984 (707 to 1254)           | 50 (36 to 63)                                            | -8.8% (-18.1% to 1.3%)                                                 |
| Namibia                            | 1421 (1015 to 1872)         | 68 (49 to 91)                                            | -34.3% (-58.3% to -9.7%)                                               |
| South Africa                       | 31489 (22407 to 39715)      | 57 (41 to 71)                                            | -29.5% (-35.4% to -25.5%)                                              |
| Zimbabwe                           | 6175 (4495 to 7836)         | 51 (37 to 64)                                            | -5.5% (-13.4% to 4%)                                                   |
| <b>Western Sub-Saharan Africa</b>  | 248091 (181695 to 324936)   | 76 (55 to 98)                                            | 12.7% (7.9% to 22.6%)                                                  |
| Benin                              | 6408 (4564 to 8217)         | 75 (54 to 95)                                            | 6.9% (-1.8% to 15.3%)                                                  |
| Burkina Faso                       | 11871 (8646 to 14957)       | 77 (56 to 96)                                            | 27.4% (17.5% to 38.4%)                                                 |
| Cabo Verde                         | 381 (274 to 483)            | 72 (52 to 92)                                            | 9.3% (-0.1% to 18.9%)                                                  |

1  
2  
3  
4  
5  
6  
7  
8  
9  
10  
11  
12  
13  
14  
15  
16  
17  
18  
19  
20  
21  
22  
23  
24  
25  
26  
27  
28  
29  
30  
31  
32  
33  
34  
35  
36  
37  
38  
39  
40  
41  
42  
43  
44  
45  
46

|                                   | YLDs                       |                                                          |                                                                        |
|-----------------------------------|----------------------------|----------------------------------------------------------|------------------------------------------------------------------------|
|                                   | Numbers (95% UI)<br>(2019) | Age-standardized rates per 100,000<br>(95% UI)<br>(2019) | Percentage change of age-standardized rates<br>(95% UI)<br>(1990–2019) |
| Cameroon                          | 17898 (12839 to 23285)     | 83 (60 to 106)                                           | 1.3% (-7.4% to 11.4%)                                                  |
| Chad                              | 8833 (6084 to 13034)       | 87 (61 to 127)                                           | -8.5% (-28.9% to 13.2%)                                                |
| Côte d'Ivoire                     | 14737 (10567 to 18642)     | 75 (54 to 94)                                            | 10.8% (2% to 21%)                                                      |
| Gambia                            | 1107 (798 to 1405)         | 68 (50 to 86)                                            | -4.5% (-20% to 7.7%)                                                   |
| Ghana                             | 22174 (15891 to 28290)     | 86 (62 to 109)                                           | 16.2% (7.7% to 24.7%)                                                  |
| Guinea                            | 6731 (4870 to 8518)        | 76 (56 to 96)                                            | 11.3% (2.1% to 21.5%)                                                  |
| Guinea-Bissau                     | 1184 (852 to 1523)         | 83 (61 to 106)                                           | 9.6% (-0.1% to 23.1%)                                                  |
| Liberia                           | 3991 (2373 to 7994)        | 105 (63 to 203)                                          | 37.1% (7.1% to 82%)                                                    |
| Mali                              | 13001 (8825 to 20343)      | 88 (62 to 138)                                           | 33.8% (10.1% to 88.8%)                                                 |
| Mauritania                        | 2685 (1935 to 3434)        | 89 (64 to 114)                                           | -2.8% (-9.4% to 4.2%)                                                  |
| Niger                             | 10196 (7356 to 12935)      | 73 (53 to 92)                                            | 6.6% (-1.7% to 16%)                                                    |
| Nigeria                           | 107235 (77703 to 141553)   | 69 (50 to 89)                                            | 11.4% (5% to 25.7%)                                                    |
| Sao Tome and Principe             | 145 (103 to 185)           | 88 (63 to 112)                                           | 13.4% (4.8% to 21.6%)                                                  |
| Senegal                           | 8308 (6023 to 10410)       | 74 (54 to 92)                                            | 10.9% (3.2% to 21.2%)                                                  |
| Sierra Leone                      | 6286 (4171 to 10476)       | 101 (67 to 167)                                          | 55.4% (19% to 138.8%)                                                  |
| Togo                              | 4915 (3518 to 6243)        | 79 (57 to 99)                                            | 2.5% (-4.9% to 10.6%)                                                  |
| <b>Eastern Sub-Saharan Africa</b> | 279864 (176063 to 502643)  | 90 (57 to 161)                                           | 1.1% (-10.4% to 8.8%)                                                  |
| Burundi                           | 29623 (9258 to 84723)      | 306 (98 to 849)                                          | 883.9% (217.8% to 2582.5%)                                             |
| Comoros                           | 678 (490 to 855)           | 106 (77 to 133)                                          | 7.2% (-0.2% to 14.6%)                                                  |
| Djibouti                          | 952 (678 to 1230)          | 91 (65 to 117)                                           | 3.2% (-6.4% to 15.6%)                                                  |
| Eritrea                           | 9577 (4639 to 23553)       | 183 (90 to 458)                                          | -58.8% (-68.2% to -30.2%)                                              |
| Ethiopia                          | 56868 (30373 to 121962)    | 72 (39 to 155)                                           | -4.2% (-17.5% to 20%)                                                  |
| Kenya                             | 15246 (11075 to 20379)     | 36 (27 to 47)                                            | 11.1% (2% to 31.2%)                                                    |

1  
2  
3  
4  
5  
6  
7  
8  
9  
10  
11  
12  
13  
14  
15  
16  
17  
18  
19  
20  
21  
22  
23  
24  
25  
26  
27  
28  
29  
30  
31  
32  
33  
34  
35  
36  
37  
38  
39  
40  
41  
42  
43  
44  
45  
46

|                                   | YLDs                       |                                                          |                                                                        |
|-----------------------------------|----------------------------|----------------------------------------------------------|------------------------------------------------------------------------|
|                                   | Numbers (95% UI)<br>(2019) | Age-standardized rates per 100,000<br>(95% UI)<br>(2019) | Percentage change of age-standardized rates<br>(95% UI)<br>(1990–2019) |
| Madagascar                        | 17061 (12159 to 21638)     | 82 (59 to 104)                                           | -0.5% (-8.3% to 8.6%)                                                  |
| Malawi                            | 9618 (6811 to 12315)       | 70 (50 to 87)                                            | 11.8% (3.4% to 21%)                                                    |
| Mozambique                        | 20719 (14681 to 29422)     | 102 (72 to 150)                                          | -48% (-69.8% to -14.4%)                                                |
| Rwanda                            | 25354 (11173 to 61782)     | 242 (109 to 579)                                         | 159.4% (28.5% to 491.7%)                                               |
| Somalia                           | 16214 (10017 to 30965)     | 106 (67 to 192)                                          | 16.4% (-38.5% to 74.2%)                                                |
| South Sudan                       | 9635 (5876 to 18305)       | 136 (87 to 248)                                          | 22.8% (4.4% to 47%)                                                    |
| Uganda                            | 26128 (18352 to 37337)     | 93 (65 to 134)                                           | -25.7% (-56.4% to 17.9%)                                               |
| United Republic of Tanzania       | 32929 (23333 to 41503)     | 78 (56 to 99)                                            | 11.5% (3.6% to 20.7%)                                                  |
| Zambia                            | 9038 (6509 to 11379)       | 66 (48 to 83)                                            | 9.1% (0.3% to 18.6%)                                                   |
| <b>Central Sub-Saharan Africa</b> | 65208 (33786 to 145484)    | 62 (33 to 135)                                           | 25.3% (8.7% to 40.1%)                                                  |
| Angola                            | 18968 (8592 to 46506)      | 89 (40 to 218)                                           | -40.7% (-48.1% to -25.2%)                                              |
| Central African Republic          | 4095 (1737 to 10241)       | 79 (36 to 189)                                           | 263.5% (71.3% to 729%)                                                 |
| Congo                             | 3607 (1642 to 8799)        | 75 (35 to 177)                                           | 208.6% (54.6% to 598.3%)                                               |
| Democratic Republic of the Congo  | 37780 (20750 to 78035)     | 53 (30 to 104)                                           | 99.1% (25.4% to 273.4%)                                                |
| Equatorial Guinea                 | 293 (209 to 379)           | 26 (19 to 34)                                            | 7.6% (-5.1% to 22.1%)                                                  |
| Gabon                             | 465 (335 to 599)           | 30 (22 to 38)                                            | -0.7% (-11.6% to 11.4%)                                                |

Abbreviations: YLDs, years lived with disability; UI, uncertainty interval

1

2

3

4

5

6

7

8

9

10

11

12

13

14

15

16

17

18

19

20

21

22

23

24

25

26

27

28

29

30

31

32

33

34

35

36

37

38

39

40

41

42

43

44

45

46

**Table 10. Incidence, prevalence, and years lived with disability for 1990 by location for spinal cord injury**

|                                  | Incidence                     |                                                             | Prevalence                         |                                                                 | YLDs                            |                                                             |
|----------------------------------|-------------------------------|-------------------------------------------------------------|------------------------------------|-----------------------------------------------------------------|---------------------------------|-------------------------------------------------------------|
|                                  | Numbers<br>(95% UI)<br>(1990) | Age-standardized<br>rates per 100,000<br>(95% UI)<br>(1990) | Numbers<br>(95% UI)<br>(1990)      | Age-standardized<br>estimates per 100,000<br>(95% UI)<br>(1990) | Numbers<br>(95% UI)<br>(1990)   | Age-standardized<br>rates per 100,000<br>(95% UI)<br>(1990) |
| <b>Global</b>                    | 595228 (471497<br>to 766656)  | 12 (10 to 16)                                               | 11366799 (10375237<br>to 13112529) | 239 (220 to 272)                                                | 3748672 (2702778<br>to 4951850) | 77 (56 to 101)                                              |
| <b>High-income</b>               | 144467 (114653<br>to 181721)  | 14 (11 to 18)                                               | 3309339 (3097968 to<br>3559963)    | 319 (298 to 343)                                                | 885050 (632972 to<br>1135187)   | 86 (62 to 111)                                              |
| <b>High-income North America</b> | 67501 (52610 to<br>87116)     | 22 (17 to 28)                                               | 1470807 (1362896 to<br>1596414)    | 468 (434 to 510)                                                | 383372 (273104 to<br>493551)    | 123 (87 to 159)                                             |
| Canada                           | 2827 (2314 to<br>3453)        | 10 (8 to 12)                                                | 61362 (57616 to<br>66045)          | 200 (188 to 215)                                                | 16435 (11771 to<br>21451)       | 54 (39 to 70)                                               |
| Greenland                        | 17 (13 to 22)                 | 39 (29 to 50)                                               | 279 (257 to 306)                   | 536 (495 to 584)                                                | 89 (65 to 114)                  | 169 (121 to 213)                                            |
| United States of America         | 64655 (50213 to<br>83656)     | 23 (18 to 29)                                               | 1409133 (1303741 to<br>1532097)    | 497 (460 to 542)                                                | 366838 (261078 to<br>473846)    | 130 (93 to 169)                                             |
| <b>Australasia</b>               | 2714 (2200 to<br>3280)        | 13 (11 to 16)                                               | 73943 (68140 to<br>82386)          | 339 (312 to 378)                                                | 19732 (13765 to<br>25937)       | 91 (63 to 120)                                              |
| Australia                        | 2175 (1760 to<br>2635)        | 13 (10 to 15)                                               | 60172 (55261 to<br>67234)          | 331 (304 to 370)                                                | 16039 (11183 to<br>21253)       | 88 (61 to 117)                                              |
| New Zealand                      | 539 (439 to 658)              | 15 (12 to 19)                                               | 13771 (12703 to<br>15056)          | 380 (350 to 416)                                                | 3693 (2583 to<br>4832)          | 102 (71 to 134)                                             |
| <b>High-income Asia Pacific</b>  | 24139 (19331 to<br>29846)     | 13 (11 to 16)                                               | 623896 (583531 to<br>673069)       | 317 (297 to 342)                                                | 171547 (120968 to<br>220202)    | 87 (62 to 112)                                              |
| Brunei Darussalam                | 19 (16 to 23)                 | 9 (7 to 10)                                                 | 396 (371 to 425)                   | 184 (173 to 196)                                                | 127 (90 to 165)                 | 58 (42 to 74)                                               |

1  
2  
3  
4  
5  
6  
7  
8  
9  
10  
11  
12  
13  
14  
15  
16  
17  
18  
19  
20  
21  
22  
23  
24  
25  
26  
27  
28  
29  
30  
31  
32  
33  
34  
35  
36  
37  
38  
39  
40  
41  
42  
43  
44  
45  
46

|                       | Incidence                     |                                                             | Prevalence                    |                                                                 | YLDs                          |                                                             |
|-----------------------|-------------------------------|-------------------------------------------------------------|-------------------------------|-----------------------------------------------------------------|-------------------------------|-------------------------------------------------------------|
|                       | Numbers<br>(95% UI)<br>(1990) | Age-standardized<br>rates per 100,000<br>(95% UI)<br>(1990) | Numbers<br>(95% UI)<br>(1990) | Age-standardized<br>estimates per 100,000<br>(95% UI)<br>(1990) | Numbers<br>(95% UI)<br>(1990) | Age-standardized<br>rates per 100,000<br>(95% UI)<br>(1990) |
| Japan                 | 19707 (15505 to 24733)        | 14 (11 to 18)                                               | 526634 (490533 to 569215)     | 347 (324 to 375)                                                | 141594 (100178 to 182978)     | 94 (66 to 122)                                              |
| Republic of Korea     | 4182 (3485 to 4986)           | 10 (8 to 12)                                                | 90930 (85259 to 96631)        | 213 (200 to 225)                                                | 28128 (19849 to 36057)        | 65 (46 to 83)                                               |
| Singapore             | 230 (191 to 276)              | 7 (6 to 9)                                                  | 5936 (5540 to 6352)           | 188 (176 to 201)                                                | 1697 (1193 to 2200)           | 53 (37 to 69)                                               |
| <b>Western Europe</b> | 46448 (36453 to 59098)        | 10 (8 to 13)                                                | 1047289 (982594 to 1125303)   | 229 (215 to 246)                                                | 279889 (197802 to 361524)     | 62 (44 to 81)                                               |
| Andorra               | 5 (4 to 7)                    | 10 (8 to 13)                                                | 138 (129 to 149)              | 231 (216 to 249)                                                | 38 (27 to 50)                 | 63 (45 to 83)                                               |
| Austria               | 1011 (796 to 1274)            | 11 (9 to 14)                                                | 22253 (20832 to 23942)        | 240 (224 to 258)                                                | 5901 (4157 to 7675)           | 64 (45 to 85)                                               |
| Belgium               | 1221 (966 to 1531)            | 11 (9 to 13)                                                | 28809 (26945 to 31200)        | 241 (225 to 263)                                                | 7661 (5439 to 9989)           | 65 (46 to 85)                                               |
| Cyprus                | 67 (54 to 81)                 | 9 (7 to 11)                                                 | 1599 (1492 to 1730)           | 196 (183 to 212)                                                | 461 (331 to 602)              | 57 (41 to 74)                                               |
| Denmark               | 752 (577 to 978)              | 11 (9 to 14)                                                | 13546 (12628 to 14620)        | 214 (199 to 232)                                                | 3584 (2531 to 4695)           | 58 (41 to 75)                                               |
| Finland               | 800 (635 to 1014)             | 14 (11 to 18)                                               | 18048 (16781 to 19591)        | 305 (283 to 333)                                                | 4795 (3379 to 6195)           | 82 (57 to 106)                                              |
| France                | 7961 (6227 to 10235)          | 12 (9 to 15)                                                | 164549 (154347 to 175895)     | 244 (229 to 262)                                                | 44198 (31606 to 57539)        | 66 (47 to 86)                                               |
| Germany               | 8658 (6811 to 10987)          | 9 (7 to 11)                                                 | 200326 (187433 to 215127)     | 205 (191 to 220)                                                | 53226 (38070 to 70139)        | 55 (39 to 73)                                               |

1  
2  
3  
4  
5  
6  
7  
8  
9  
10  
11  
12  
13  
14  
15  
16  
17  
18  
19  
20  
21  
22  
23  
24  
25  
26  
27  
28  
29  
30  
31  
32  
33  
34  
35  
36  
37  
38  
39  
40  
41  
42  
43  
44  
45  
46

|             | Incidence                     |                                                             | Prevalence                    |                                                                 | YLDs                          |                                                             |
|-------------|-------------------------------|-------------------------------------------------------------|-------------------------------|-----------------------------------------------------------------|-------------------------------|-------------------------------------------------------------|
|             | Numbers<br>(95% UI)<br>(1990) | Age-standardized<br>rates per 100,000<br>(95% UI)<br>(1990) | Numbers<br>(95% UI)<br>(1990) | Age-standardized<br>estimates per 100,000<br>(95% UI)<br>(1990) | Numbers<br>(95% UI)<br>(1990) | Age-standardized<br>rates per 100,000<br>(95% UI)<br>(1990) |
| Greece      | 912 (738 to 1121)             | 8 (7 to 10)                                                 | 26017 (24358 to 28055)        | 214 (200 to 232)                                                | 7006 (4919 to 9093)           | 58 (41 to 76)                                               |
| Iceland     | 23 (19 to 29)                 | 9 (7 to 11)                                                 | 563 (527 to 606)              | 213 (199 to 229)                                                | 152 (107 to 200)              | 58 (41 to 76)                                               |
| Ireland     | 307 (247 to 379)              | 8 (7 to 10)                                                 | 7297 (6822 to 7883)           | 199 (186 to 216)                                                | 1985 (1414 to 2614)           | 54 (39 to 72)                                               |
| Israel      | 396 (315 to 513)              | 8 (6 to 10)                                                 | 9064 (8381 to 9847)           | 191 (176 to 207)                                                | 2599 (1868 to 3382)           | 55 (39 to 71)                                               |
| Italy       | 6984 (5309 to 9235)           | 10 (8 to 13)                                                | 152759 (143157 to 165237)     | 218 (204 to 235)                                                | 40412 (28984 to 52258)        | 59 (42 to 76)                                               |
| Luxembourg  | 46 (37 to 58)                 | 11 (9 to 13)                                                | 1098 (1035 to 1181)           | 240 (226 to 259)                                                | 295 (209 to 385)              | 65 (46 to 85)                                               |
| Malta       | 32 (26 to 40)                 | 9 (7 to 11)                                                 | 839 (776 to 919)              | 208 (192 to 228)                                                | 232 (164 to 306)              | 58 (41 to 76)                                               |
| Monaco      | 8 (6 to 11)                   | 18 (13 to 24)                                               | 180 (164 to 197)              | 428 (390 to 477)                                                | 47 (33 to 62)                 | 116 (81 to 153)                                             |
| Netherlands | 1306 (1026 to 1627)           | 8 (6 to 10)                                                 | 30052 (28101 to 32175)        | 175 (163 to 188)                                                | 8074 (5744 to 10507)          | 47 (33 to 61)                                               |
| Norway      | 1525 (1067 to 2203)           | 26 (19 to 37)                                               | 25378 (23017 to 27724)        | 486 (444 to 531)                                                | 6642 (4671 to 8561)           | 129 (91 to 169)                                             |
| Portugal    | 844 (690 to 1026)             | 8 (6 to 9)                                                  | 23506 (21407 to 27259)        | 207 (188 to 245)                                                | 6969 (4907 to 9277)           | 62 (44 to 84)                                               |
| San Marino  | 5 (4 to 6)                    | 18 (14 to 24)                                               | 123 (113 to 135)              | 454 (416 to 501)                                                | 33 (23 to 44)                 | 123 (87 to 163)                                             |
| Spain       | 3241 (2655 to 3941)           | 8 (6 to 9)                                                  | 86830 (81809 to 92631)        | 197 (185 to 210)                                                | 23321 (16596 to 30399)        | 53 (38 to 70)                                               |

1  
2  
3  
4  
5  
6  
7  
8  
9  
10  
11  
12  
13  
14  
15  
16  
17  
18  
19  
20  
21  
22  
23  
24  
25  
26  
27  
28  
29  
30  
31  
32  
33  
34  
35  
36  
37  
38  
39  
40  
41  
42  
43  
44  
45  
46

|                                                         | Incidence                     |                                                             | Prevalence                    |                                                                 | YLDs                          |                                                             |
|---------------------------------------------------------|-------------------------------|-------------------------------------------------------------|-------------------------------|-----------------------------------------------------------------|-------------------------------|-------------------------------------------------------------|
|                                                         | Numbers<br>(95% UI)<br>(1990) | Age-standardized<br>rates per 100,000<br>(95% UI)<br>(1990) | Numbers<br>(95% UI)<br>(1990) | Age-standardized<br>estimates per 100,000<br>(95% UI)<br>(1990) | Numbers<br>(95% UI)<br>(1990) | Age-standardized<br>rates per 100,000<br>(95% UI)<br>(1990) |
| Sweden                                                  | 2789 (1953 to 4022)           | 24 (17 to 32)                                               | 53249 (48329 to 58425)        | 489 (447 to 539)                                                | 14031 (9879 to 18292)         | 131 (92 to 172)                                             |
| Switzerland                                             | 1194 (929 to 1527)            | 14 (11 to 18)                                               | 25301 (23630 to 27371)        | 300 (280 to 323)                                                | 6683 (4699 to 8775)           | 80 (57 to 105)                                              |
| United Kingdom                                          | 6323 (4968 to 8043)           | 10 (8 to 12)                                                | 154893 (144548 to 166794)     | 231 (216 to 250)                                                | 41311 (29390 to 53200)        | 63 (45 to 81)                                               |
| <b>Southern Latin America</b>                           | 3665 (3016 to 4385)           | 8 (6 to 9)                                                  | 93403 (86234 to 104555)       | 194 (179 to 216)                                                | 30510 (22019 to 39520)        | 63 (46 to 82)                                               |
| Argentina                                               | 2425 (2006 to 2895)           | 7 (6 to 9)                                                  | 63830 (57864 to 74714)        | 197 (179 to 230)                                                | 21112 (15060 to 28261)        | 65 (47 to 87)                                               |
| Chile                                                   | 965 (798 to 1153)             | 8 (6 to 9)                                                  | 22612 (21262 to 24053)        | 182 (172 to 193)                                                | 7238 (5210 to 9296)           | 58 (42 to 74)                                               |
| Uruguay                                                 | 275 (221 to 340)              | 9 (7 to 11)                                                 | 6957 (6534 to 7440)           | 212 (198 to 227)                                                | 2159 (1561 to 2790)           | 66 (48 to 85)                                               |
| <b>Central Europe, Eastern Europe, and Central Asia</b> | 60749 (48760 to 75114)        | 14 (11 to 18)                                               | 1454386 (1361320 to 1563953)  | 325 (304 to 349)                                                | 444671 (316403 to 564756)     | 100 (71 to 127)                                             |
| <b>Eastern Europe</b>                                   | 36775 (29156 to 46344)        | 16 (12 to 20)                                               | 899009 (838179 to 972430)     | 354 (330 to 382)                                                | 271646 (192682 to 347314)     | 108 (76 to 138)                                             |
| Belarus                                                 | 1441 (1168 to 1785)           | 13 (11 to 16)                                               | 35844 (33576 to 38509)        | 309 (289 to 332)                                                | 10900 (7733 to 13970)         | 95 (67 to 121)                                              |
| Estonia                                                 | 274 (223 to 339)              | 17 (14 to 21)                                               | 6363 (5922 to 6860)           | 358 (333 to 385)                                                | 1886 (1327 to 2431)           | 107 (76 to 138)                                             |



1  
2  
3  
4  
5  
6  
7  
8  
9  
10  
11  
12  
13  
14  
15  
16  
17  
18  
19  
20  
21  
22  
23  
24  
25  
26  
27  
28  
29  
30  
31  
32  
33  
34  
35  
36  
37  
38  
39  
40  
41  
42  
43  
44  
45  
46

|                        | Incidence                     |                                                             | Prevalence                    |                                                                 | YLDs                          |                                                             |
|------------------------|-------------------------------|-------------------------------------------------------------|-------------------------------|-----------------------------------------------------------------|-------------------------------|-------------------------------------------------------------|
|                        | Numbers<br>(95% UI)<br>(1990) | Age-standardized<br>rates per 100,000<br>(95% UI)<br>(1990) | Numbers<br>(95% UI)<br>(1990) | Age-standardized<br>estimates per 100,000<br>(95% UI)<br>(1990) | Numbers<br>(95% UI)<br>(1990) | Age-standardized<br>rates per 100,000<br>(95% UI)<br>(1990) |
| Latvia                 | 527 (423 to 652)              | 18 (15 to 23)                                               | 11684 (10953 to 12620)        | 382 (358 to 412)                                                | 3483 (2489 to 4452)           | 115 (82 to 147)                                             |
| Lithuania              | 659 (531 to 815)              | 17 (14 to 21)                                               | 14772 (13822 to 15932)        | 362 (338 to 390)                                                | 4346 (3095 to 5557)           | 107 (76 to 137)                                             |
| Republic of Moldova    | 562 (454 to 702)              | 13 (10 to 16)                                               | 12807 (12015 to 13711)        | 279 (262 to 299)                                                | 4120 (2959 to 5252)           | 90 (65 to 114)                                              |
| Russian Federation     | 24982 (19584 to 31842)        | 16 (13 to 20)                                               | 608061 (566008 to 658182)     | 361 (336 to 390)                                                | 184998 (131132 to 235248)     | 111 (78 to 141)                                             |
| Ukraine                | 8330 (6687 to 10418)          | 15 (12 to 19)                                               | 209478 (194928 to 226542)     | 346 (322 to 374)                                                | 61912 (43941 to 79689)        | 104 (74 to 133)                                             |
| <b>Central Europe</b>  | 19087 (15495 to 23162)        | 15 (12 to 18)                                               | 439972 (412747 to 471841)     | 326 (306 to 350)                                                | 134251 (96558 to 170285)      | 100 (72 to 127)                                             |
| Albania                | 357 (280 to 449)              | 11 (9 to 14)                                                | 8866 (8151 to 9594)           | 306 (282 to 330)                                                | 2910 (2092 to 3738)           | 99 (71 to 127)                                              |
| Bosnia and Herzegovina | 685 (488 to 1106)             | 15 (11 to 24)                                               | 14423 (12916 to 17202)        | 302 (271 to 363)                                                | 4834 (3424 to 6442)           | 101 (72 to 135)                                             |
| Bulgaria               | 1161 (950 to 1404)            | 13 (11 to 16)                                               | 32719 (30682 to 35010)        | 325 (304 to 348)                                                | 9803 (6941 to 12610)          | 99 (70 to 127)                                              |
| Croatia                | 832 (670 to 1027)             | 16 (13 to 20)                                               | 19846 (18467 to 21281)        | 350 (325 to 375)                                                | 5550 (3949 to 7139)           | 99 (70 to 128)                                              |
| Czechia                | 2133 (1690 to 2694)           | 19 (15 to 23)                                               | 42455 (39887 to 45742)        | 362 (340 to 390)                                                | 12202 (8618 to 15787)         | 105 (75 to 136)                                             |

1  
2  
3  
4  
5  
6  
7  
8  
9  
10  
11  
12  
13  
14  
15  
16  
17  
18  
19  
20  
21  
22  
23  
24  
25  
26  
27  
28  
29  
30  
31  
32  
33  
34  
35  
36  
37  
38  
39  
40  
41  
42  
43  
44  
45  
46

|                     | Incidence                     |                                                             | Prevalence                    |                                                                 | YLDs                          |                                                             |
|---------------------|-------------------------------|-------------------------------------------------------------|-------------------------------|-----------------------------------------------------------------|-------------------------------|-------------------------------------------------------------|
|                     | Numbers<br>(95% UI)<br>(1990) | Age-standardized<br>rates per 100,000<br>(95% UI)<br>(1990) | Numbers<br>(95% UI)<br>(1990) | Age-standardized<br>estimates per 100,000<br>(95% UI)<br>(1990) | Numbers<br>(95% UI)<br>(1990) | Age-standardized<br>rates per 100,000<br>(95% UI)<br>(1990) |
| Hungary             | 2243 (1764 to 2836)           | 19 (15 to 24)                                               | 40571 (38006 to 43552)        | 332 (310 to 357)                                                | 11949 (8547 to 15269)         | 99 (70 to 127)                                              |
| Montenegro          | 80 (65 to 97)                 | 13 (10 to 15)                                               | 2028 (1896 to 2178)           | 313 (292 to 336)                                                | 587 (418 to 757)              | 91 (64 to 117)                                              |
| North Macedonia     | 197 (160 to 240)              | 10 (8 to 12)                                                | 5347 (4945 to 5725)           | 257 (238 to 275)                                                | 1697 (1189 to 2167)           | 81 (57 to 104)                                              |
| Poland              | 5733 (4558 to 7097)           | 15 (12 to 18)                                               | 132249 (123697 to 142241)     | 322 (301 to 346)                                                | 40801 (29267 to 51706)        | 100 (71 to 126)                                             |
| Romania             | 3310 (2715 to 3957)           | 14 (11 to 16)                                               | 83378 (78152 to 89666)        | 327 (306 to 352)                                                | 26357 (18966 to 33675)        | 104 (75 to 133)                                             |
| Serbia              | 1074 (868 to 1324)            | 11 (9 to 14)                                                | 30163 (28050 to 32472)        | 287 (265 to 308)                                                | 9405 (6815 to 12082)          | 90 (65 to 115)                                              |
| Slovakia            | 870 (701 to 1066)             | 16 (13 to 19)                                               | 18681 (17476 to 20094)        | 333 (311 to 359)                                                | 5560 (3928 to 7110)           | 99 (70 to 127)                                              |
| Slovenia            | 411 (329 to 510)              | 19 (15 to 24)                                               | 9245 (8607 to 9977)           | 413 (384 to 445)                                                | 2596 (1853 to 3396)           | 117 (83 to 153)                                             |
| <b>Central Asia</b> | 4887 (4059 to 5797)           | 7 (6 to 9)                                                  | 115405 (107057 to 125666)     | 191 (178 to 208)                                                | 38774 (28022 to 49649)        | 64 (46 to 81)                                               |
| Armenia             | 294 (243 to 352)              | 9 (7 to 10)                                                 | 15954 (10905 to 25069)        | 483 (332 to 766)                                                | 5198 (3146 to 8491)           | 157 (95 to 255)                                             |
| Azerbaijan          | 472 (391 to 570)              | 6 (5 to 8)                                                  | 10359 (9704 to 11027)         | 156 (147 to 166)                                                | 3604 (2571 to 4580)           | 54 (39 to 69)                                               |

1  
2  
3  
4  
5  
6  
7  
8  
9  
10  
11  
12  
13  
14  
15  
16  
17  
18  
19  
20  
21  
22  
23  
24  
25  
26  
27  
28  
29  
30  
31  
32  
33  
34  
35  
36  
37  
38  
39  
40  
41  
42  
43  
44  
45  
46

|                                    | Incidence                     |                                                             | Prevalence                    |                                                                 | YLDs                          |                                                             |
|------------------------------------|-------------------------------|-------------------------------------------------------------|-------------------------------|-----------------------------------------------------------------|-------------------------------|-------------------------------------------------------------|
|                                    | Numbers<br>(95% UI)<br>(1990) | Age-standardized<br>rates per 100,000<br>(95% UI)<br>(1990) | Numbers<br>(95% UI)<br>(1990) | Age-standardized<br>estimates per 100,000<br>(95% UI)<br>(1990) | Numbers<br>(95% UI)<br>(1990) | Age-standardized<br>rates per 100,000<br>(95% UI)<br>(1990) |
| Georgia                            | 455 (375 to 545)              | 8 (7 to 10)                                                 | 11614 (10921 to 12425)        | 199 (187 to 212)                                                | 3591 (2566 to 4613)           | 62 (44 to 79)                                               |
| Kazakhstan                         | 1384 (1137 to 1671)           | 8 (7 to 10)                                                 | 31263 (29228 to 33341)        | 201 (188 to 215)                                                | 10394 (7403 to 13230)         | 66 (47 to 84)                                               |
| Kyrgyzstan                         | 327 (271 to 389)              | 8 (6 to 9)                                                  | 6759 (6335 to 7180)           | 179 (168 to 190)                                                | 2318 (1672 to 2968)           | 61 (44 to 77)                                               |
| Mongolia                           | 147 (122 to 175)              | 7 (6 to 9)                                                  | 2544 (2390 to 2715)           | 151 (142 to 161)                                                | 951 (688 to 1200)             | 55 (40 to 70)                                               |
| Tajikistan                         | 351 (292 to 416)              | 7 (6 to 8)                                                  | 6617 (6202 to 7080)           | 165 (155 to 176)                                                | 2367 (1683 to 3005)           | 58 (42 to 73)                                               |
| Turkmenistan                       | 208 (173 to 249)              | 6 (5 to 7)                                                  | 4278 (4001 to 4543)           | 144 (135 to 153)                                                | 1498 (1072 to 1913)           | 50 (36 to 63)                                               |
| Uzbekistan                         | 1249 (1049 to 1482)           | 6 (5 to 7)                                                  | 26017 (24383 to 27765)        | 157 (148 to 167)                                                | 8854 (6375 to 11451)          | 53 (37 to 68)                                               |
| <b>Latin America and Caribbean</b> | 45415 (36265 to 57008)        | 13 (10 to 16)                                               | 945885 (843370 to 1108550)    | 288 (260 to 329)                                                | 332236 (236429 to 446580)     | 99 (71 to 129)                                              |
| <b>Central Latin America</b>       | 19015 (14979 to 24183)        | 13 (10 to 17)                                               | 422080 (355172 to 564287)     | 311 (271 to 394)                                                | 152900 (104937 to 229866)     | 110 (77 to 157)                                             |
| Colombia                           | 3049 (2237 to 4529)           | 10 (7 to 14)                                                | 62172 (54456 to 74082)        | 220 (196 to 254)                                                | 21868 (15273 to 29497)        | 76 (54 to 100)                                              |
| Costa Rica                         | 172 (140 to 211)              | 6 (5 to 8)                                                  | 3776 (3499 to 4080)           | 149 (139 to 160)                                                | 1189 (848 to 1554)            | 46 (33 to 59)                                               |
| El Salvador                        | 943 (445 to 2252)             | 17 (9 to 40)                                                | 34391 (12461 to 90889)        | 671 (263 to 1743)                                               | 14593 (4794 to 41290)         | 280 (95 to 763)                                             |

1  
2  
3  
4  
5  
6  
7  
8  
9  
10  
11  
12  
13  
14  
15  
16  
17  
18  
19  
20  
21  
22  
23  
24  
25  
26  
27  
28  
29  
30  
31  
32  
33  
34  
35  
36  
37  
38  
39  
40  
41  
42  
43  
44  
45  
46

|                                    | Incidence                     |                                                             | Prevalence                    |                                                                 | YLDs                          |                                                             |
|------------------------------------|-------------------------------|-------------------------------------------------------------|-------------------------------|-----------------------------------------------------------------|-------------------------------|-------------------------------------------------------------|
|                                    | Numbers<br>(95% UI)<br>(1990) | Age-standardized<br>rates per 100,000<br>(95% UI)<br>(1990) | Numbers<br>(95% UI)<br>(1990) | Age-standardized<br>estimates per 100,000<br>(95% UI)<br>(1990) | Numbers<br>(95% UI)<br>(1990) | Age-standardized<br>rates per 100,000<br>(95% UI)<br>(1990) |
| Guatemala                          | 871 (500 to 1724)             | 11 (7 to 21)                                                | 21796 (10355 to 49254)        | 308 (158 to 673)                                                | 9339 (3905 to 23409)          | 129 (58 to 318)                                             |
| Honduras                           | 229 (186 to 276)              | 5 (4 to 6)                                                  | 4381 (4085 to 4715)           | 125 (118 to 133)                                                | 1644 (1189 to 2093)           | 46 (33 to 58)                                               |
| Mexico                             | 12232 (9539 to 15778)         | 17 (13 to 22)                                               | 241316 (222816 to 264653)     | 365 (338 to 399)                                                | 83476 (60063 to 105507)       | 123 (89 to 155)                                             |
| Nicaragua                          | 210 (162 to 286)              | 6 (4 to 7)                                                  | 25022 (7657 to 67214)         | 667 (232 to 1742)                                               | 10677 (3015 to 31127)         | 279 (85 to 785)                                             |
| Panama                             | 125 (101 to 154)              | 6 (4 to 7)                                                  | 3415 (2840 to 5443)           | 161 (137 to 240)                                                | 1175 (776 to 2105)            | 54 (37 to 92)                                               |
| Venezuela (Bolivarian Republic of) | 1184 (951 to 1472)            | 7 (5 to 8)                                                  | 25812 (23940 to 27785)        | 163 (152 to 174)                                                | 8941 (6413 to 11455)          | 55 (40 to 70)                                               |
| <b>Andean Latin America</b>        | 2898 (1837 to 5488)           | 8 (5 to 14)                                                 | 45203 (35649 to 68463)        | 137 (113 to 195)                                                | 17534 (11289 to 29299)        | 52 (35 to 82)                                               |
| Bolivia (Plurinational State of)   | 249 (208 to 292)              | 4 (4 to 5)                                                  | 4761 (4505 to 5045)           | 93 (89 to 98)                                                   | 1861 (1329 to 2351)           | 36 (26 to 45)                                               |
| Ecuador                            | 429 (362 to 506)              | 5 (4 to 6)                                                  | 10497 (9440 to 12158)         | 129 (117 to 147)                                                | 3868 (2730 to 5003)           | 47 (33 to 60)                                               |
| Peru                               | 2220 (1205 to 4832)           | 10 (6 to 21)                                                | 29944 (20967 to 51939)        | 154 (114 to 249)                                                | 11805 (6784 to 23027)         | 59 (36 to 108)                                              |
| <b>Caribbean</b>                   | 2137 (1747 to 2618)           | 7 (5 to 8)                                                  | 45566 (43184 to 48167)        | 145 (138 to 153)                                                | 14906 (10845 to 18906)        | 47 (34 to 59)                                               |
| Antigua and Barbuda                | 3 (2 to 3)                    | 4 (3 to 5)                                                  | 64 (60 to 68)                 | 113 (106 to 120)                                                | 21 (15 to 27)                 | 36 (26 to 47)                                               |

|                                           | Incidence                     |                                                             | Prevalence                    |                                                                 | YLDs                          |                                                             |
|-------------------------------------------|-------------------------------|-------------------------------------------------------------|-------------------------------|-----------------------------------------------------------------|-------------------------------|-------------------------------------------------------------|
|                                           | Numbers<br>(95% UI)<br>(1990) | Age-standardized<br>rates per 100,000<br>(95% UI)<br>(1990) | Numbers<br>(95% UI)<br>(1990) | Age-standardized<br>estimates per 100,000<br>(95% UI)<br>(1990) | Numbers<br>(95% UI)<br>(1990) | Age-standardized<br>rates per 100,000<br>(95% UI)<br>(1990) |
| 10 Bahamas                                | 11 (9 to 14)                  | 5 (4 to 6)                                                  | 251 (236 to 266)              | 107 (102 to 113)                                                | 84 (60 to 107)                | 35 (25 to 45)                                               |
| 11 Barbados                               | 11 (9 to 13)                  | 4 (3 to 5)                                                  | 272 (255 to 289)              | 105 (98 to 111)                                                 | 88 (64 to 112)                | 34 (25 to 43)                                               |
| 12 Belize                                 | 11 (8 to 19)                  | 6 (4 to 9)                                                  | 166 (153 to 184)              | 118 (110 to 129)                                                | 59 (42 to 77)                 | 41 (30 to 53)                                               |
| 14 Bermuda                                | 6 (5 to 8)                    | 11 (8 to 14)                                                | 165 (154 to 177)              | 248 (232 to 266)                                                | 50 (36 to 65)                 | 76 (54 to 98)                                               |
| 16 Cuba                                   | 773 (629 to 944)              | 7 (6 to 9)                                                  | 16409 (15431 to 17403)        | 150 (141 to 158)                                                | 5056 (3569 to 6436)           | 46 (33 to 58)                                               |
| 18 Dominica                               | 3 (2 to 4)                    | 4 (3 to 5)                                                  | 71 (65 to 82)                 | 107 (98 to 122)                                                 | 24 (17 to 32)                 | 36 (26 to 48)                                               |
| 20 Dominican Republic                     | 282 (222 to 358)              | 4 (3 to 5)                                                  | 6180 (5782 to 6599)           | 107 (101 to 114)                                                | 2235 (1614 to 2834)           | 38 (28 to 48)                                               |
| 22 Grenada                                | 4 (3 to 4)                    | 4 (3 to 5)                                                  | 102 (77 to 169)               | 136 (104 to 218)                                                | 37 (23 to 70)                 | 49 (31 to 89)                                               |
| 23 Guyana                                 | 37 (31 to 44)                 | 6 (5 to 7)                                                  | 710 (663 to 781)              | 107 (101 to 117)                                                | 260 (189 to 331)              | 39 (28 to 49)                                               |
| 25 Haiti                                  | 258 (210 to 315)              | 4 (4 to 5)                                                  | 4542 (4299 to 4839)           | 88 (83 to 93)                                                   | 1824 (1321 to 2337)           | 35 (25 to 44)                                               |
| 27 Jamaica                                | 107 (85 to 138)               | 5 (4 to 6)                                                  | 2379 (2231 to 2558)           | 116 (109 to 124)                                                | 786 (568 to 1021)             | 38 (27 to 49)                                               |
| 29 Puerto Rico                            | 452 (349 to 580)              | 13 (10 to 16)                                               | 10610 (9955 to 11350)         | 293 (275 to 313)                                                | 3152 (2227 to 4050)           | 87 (61 to 112)                                              |
| 31 Saint Kitts and Nevis                  | 4 (3 to 6)                    | 11 (9 to 14)                                                | 77 (72 to 82)                 | 213 (200 to 226)                                                | 25 (18 to 31)                 | 68 (49 to 86)                                               |
| 32 Saint Lucia                            | 6 (5 to 8)                    | 5 (4 to 6)                                                  | 121 (113 to 131)              | 107 (100 to 115)                                                | 42 (30 to 54)                 | 37 (27 to 47)                                               |
| 34 Saint Vincent and the<br>35 Grenadines | 4 (4 to 5)                    | 4 (3 to 5)                                                  | 93 (87 to 99)                 | 102 (96 to 109)                                                 | 32 (23 to 40)                 | 35 (25 to 44)                                               |
| 36 Suriname                               | 16 (13 to 21)                 | 4 (4 to 5)                                                  | 445 (366 to 702)              | 126 (106 to 190)                                                | 160 (108 to 261)              | 45 (30 to 70)                                               |
| 38 Trinidad and Tobago                    | 65 (48 to 99)                 | 6 (4 to 9)                                                  | 1133 (1056 to 1227)           | 103 (96 to 111)                                                 | 390 (278 to 506)              | 35 (25 to 45)                                               |

1  
2  
3  
4  
5  
6  
7  
8  
9  
10  
11  
12  
13  
14  
15  
16  
17  
18  
19  
20  
21  
22  
23  
24  
25  
26  
27  
28  
29  
30  
31  
32  
33  
34  
35  
36  
37  
38  
39  
40  
41  
42  
43  
44  
45  
46

|                                               | Incidence                     |                                                             | Prevalence                    |                                                                 | YLDs                          |                                                             |
|-----------------------------------------------|-------------------------------|-------------------------------------------------------------|-------------------------------|-----------------------------------------------------------------|-------------------------------|-------------------------------------------------------------|
|                                               | Numbers<br>(95% UI)<br>(1990) | Age-standardized<br>rates per 100,000<br>(95% UI)<br>(1990) | Numbers<br>(95% UI)<br>(1990) | Age-standardized<br>estimates per 100,000<br>(95% UI)<br>(1990) | Numbers<br>(95% UI)<br>(1990) | Age-standardized<br>rates per 100,000<br>(95% UI)<br>(1990) |
| United States Virgin Islands                  | 11 (8 to 14)                  | 11 (8 to 14)                                                | 260 (244 to 276)              | 250 (235 to 266)                                                | 84 (61 to 106)                | 80 (58 to 101)                                              |
| <b>Tropical Latin America</b>                 | 21365 (16580 to 27710)        | 16 (12 to 20)                                               | 433036 (398417 to 474467)     | 333 (308 to 363)                                                | 146895 (104835 to 186002)     | 111 (80 to 140)                                             |
| Brazil                                        | 21177 (16415 to 27463)        | 16 (12 to 21)                                               | 428811 (394414 to 470171)     | 338 (312 to 369)                                                | 145402 (103654 to 184192)     | 113 (81 to 142)                                             |
| Paraguay                                      | 188 (155 to 226)              | 5 (4 to 6)                                                  | 4224 (3901 to 4636)           | 133 (124 to 144)                                                | 1494 (1070 to 1924)           | 46 (33 to 59)                                               |
| <b>Southeast Asia, East Asia, and Oceania</b> | 141335 (111053 to 179070)     | 9 (7 to 12)                                                 | 2869879 (2659889 to 3149019)  | 189 (176 to 207)                                                | 1002681 (732643 to 1259197)   | 65 (48 to 82)                                               |
| <b>East Asia</b>                              | 104274 (79266 to 134082)      | 10 (7 to 13)                                                | 2174815 (2017401 to 2348060)  | 193 (180 to 208)                                                | 742342 (531641 to 940603)     | 65 (46 to 82)                                               |
| China                                         | 102622 (77801 to 132131)      | 10 (7 to 13)                                                | 2139839 (1983005 to 2312296)  | 197 (183 to 213)                                                | 731470 (523591 to 926331)     | 66 (47 to 84)                                               |
| Democratic People's Republic of Korea         | 662 (539 to 821)              | 3 (3 to 4)                                                  | 14339 (13493 to 15314)        | 72 (68 to 77)                                                   | 4753 (3395 to 6097)           | 24 (17 to 30)                                               |
| Taiwan (Province of China)                    | 990 (800 to 1238)             | 5 (4 to 6)                                                  | 20637 (19362 to 21924)        | 106 (100 to 113)                                                | 6119 (4255 to 8025)           | 31 (22 to 41)                                               |
| <b>Southeast Asia</b>                         | 36808 (28373 to 48545)        | 9 (7 to 12)                                                 | 690953 (602962 to 898824)     | 176 (158 to 220)                                                | 258828 (180465 to 372095)     | 65 (46 to 89)                                               |
| Cambodia                                      | 574 (386 to 1005)             | 6 (4 to 10)                                                 | 29805 (8827 to 99033)         | 311 (107 to 991)                                                | 13370 (3463 to 42654)         | 137 (41 to 421)                                             |

1  
2  
3  
4  
5  
6  
7  
8  
9  
10  
11  
12  
13  
14  
15  
16  
17  
18  
19  
20  
21  
22  
23  
24  
25  
26  
27  
28  
29  
30  
31  
32  
33  
34  
35  
36  
37  
38  
39  
40  
41  
42  
43  
44  
45  
46

|                                  | Incidence                     |                                                             | Prevalence                    |                                                                 | YLDs                          |                                                             |
|----------------------------------|-------------------------------|-------------------------------------------------------------|-------------------------------|-----------------------------------------------------------------|-------------------------------|-------------------------------------------------------------|
|                                  | Numbers<br>(95% UI)<br>(1990) | Age-standardized<br>rates per 100,000<br>(95% UI)<br>(1990) | Numbers<br>(95% UI)<br>(1990) | Age-standardized<br>estimates per 100,000<br>(95% UI)<br>(1990) | Numbers<br>(95% UI)<br>(1990) | Age-standardized<br>rates per 100,000<br>(95% UI)<br>(1990) |
| Indonesia                        | 18250 (14109 to 23763)        | 12 (9 to 16)                                                | 371199 (342075 to 415584)     | 244 (226 to 269)                                                | 138111 (102139 to 173454)     | 89 (66 to 111)                                              |
| Lao People's Democratic Republic | 305 (168 to 640)              | 8 (4 to 15)                                                 | 2735 (2537 to 2982)           | 85 (79 to 91)                                                   | 1114 (814 to 1425)            | 34 (25 to 43)                                               |
| Malaysia                         | 742 (575 to 955)              | 5 (4 to 6)                                                  | 15417 (14482 to 16507)        | 107 (101 to 114)                                                | 5366 (3824 to 6836)           | 37 (26 to 47)                                               |
| Maldives                         | 7 (6 to 8)                    | 4 (3 to 5)                                                  | 124 (117 to 131)              | 81 (77 to 86)                                                   | 44 (32 to 57)                 | 29 (21 to 36)                                               |
| Mauritius                        | 86 (66 to 113)                | 8 (6 to 11)                                                 | 1930 (1813 to 2073)           | 188 (177 to 201)                                                | 622 (444 to 798)              | 60 (43 to 77)                                               |
| Myanmar                          | 2114 (1669 to 2836)           | 6 (5 to 7)                                                  | 45843 (31351 to 98916)        | 124 (90 to 251)                                                 | 18809 (10422 to 43265)        | 50 (29 to 108)                                              |
| Philippines                      | 4386 (3208 to 6290)           | 8 (6 to 11)                                                 | 70220 (53653 to 111258)       | 137 (110 to 204)                                                | 26715 (16967 to 47094)        | 51 (33 to 84)                                               |
| Seychelles                       | 6 (5 to 8)                    | 9 (7 to 12)                                                 | 126 (118 to 135)              | 197 (184 to 210)                                                | 43 (31 to 54)                 | 67 (49 to 85)                                               |
| Sri Lanka                        | 4222 (1659 to 10682)          | 24 (10 to 59)                                               | 28614 (20202 to 48485)        | 176 (130 to 285)                                                | 10662 (6172 to 20907)         | 64 (39 to 120)                                              |
| Thailand                         | 3095 (2432 to 3953)           | 6 (5 to 7)                                                  | 67897 (63611 to 72766)        | 131 (123 to 140)                                                | 23282 (16627 to 29397)        | 44 (32 to 56)                                               |
| Timor-Leste                      | 142 (50 to 380)               | 17 (7 to 45)                                                | 2771 (998 to 7454)            | 372 (146 to 974)                                                | 1261 (429 to 3464)            | 167 (60 to 449)                                             |
| Viet Nam                         | 2831 (2271 to 3514)           | 5 (4 to 6)                                                  | 53354 (50294 to 56627)        | 100 (95 to 106)                                                 | 19083 (14045 to 24179)        | 35 (26 to 45)                                               |
| <b>Oceania</b>                   | 253 (203 to 313)              | 5 (4 to 6)                                                  | 4111 (3871 to 4403)           | 82 (78 to 88)                                                   | 1511 (1114 to 1906)           | 30 (22 to 37)                                               |

1  
2  
3  
4  
5  
6  
7  
8  
9  
10  
11  
12  
13  
14  
15  
16  
17  
18  
19  
20  
21  
22  
23  
24  
25  
26  
27  
28  
29  
30  
31  
32  
33  
34  
35  
36  
37  
38  
39  
40  
41  
42  
43  
44  
45  
46

|                                     | Incidence                     |                                                             | Prevalence                    |                                                                 | YLDs                          |                                                             |
|-------------------------------------|-------------------------------|-------------------------------------------------------------|-------------------------------|-----------------------------------------------------------------|-------------------------------|-------------------------------------------------------------|
|                                     | Numbers<br>(95% UI)<br>(1990) | Age-standardized<br>rates per 100,000<br>(95% UI)<br>(1990) | Numbers<br>(95% UI)<br>(1990) | Age-standardized<br>estimates per 100,000<br>(95% UI)<br>(1990) | Numbers<br>(95% UI)<br>(1990) | Age-standardized<br>rates per 100,000<br>(95% UI)<br>(1990) |
| American Samoa                      | 4 (3 to 5)                    | 9 (7 to 12)                                                 | 72 (67 to 77)                 | 193 (181 to 207)                                                | 24 (17 to 31)                 | 64 (46 to 81)                                               |
| Cook Islands                        | 2 (2 to 3)                    | 12 (9 to 17)                                                | 37 (34 to 40)                 | 227 (210 to 246)                                                | 11 (8 to 15)                  | 70 (50 to 91)                                               |
| Fiji                                | 23 (19 to 29)                 | 3 (3 to 4)                                                  | 484 (448 to 524)              | 75 (70 to 80)                                                   | 172 (123 to 221)              | 26 (19 to 33)                                               |
| Guam                                | 11 (9 to 15)                  | 9 (7 to 12)                                                 | 256 (238 to 277)              | 214 (200 to 231)                                                | 79 (57 to 103)                | 65 (47 to 84)                                               |
| Kiribati                            | 2 (2 to 3)                    | 3 (2 to 4)                                                  | 32 (30 to 35)                 | 52 (48 to 56)                                                   | 13 (9 to 16)                  | 20 (14 to 25)                                               |
| Marshall Islands                    | 1 (1 to 2)                    | 4 (3 to 5)                                                  | 24 (22 to 25)                 | 76 (72 to 82)                                                   | 9 (6 to 11)                   | 28 (20 to 35)                                               |
| Micronesia (Federated States of)    | 4 (3 to 4)                    | 4 (3 to 5)                                                  | 57 (53 to 62)                 | 75 (70 to 81)                                                   | 21 (15 to 27)                 | 28 (20 to 35)                                               |
| Nauru                               | 1 (1 to 1)                    | 9 (7 to 12)                                                 | 13 (12 to 14)                 | 162 (152 to 173)                                                | 4 (3 to 6)                    | 53 (39 to 68)                                               |
| Niue                                | 0 (0 to 0)                    | 9 (7 to 11)                                                 | 4 (3 to 4)                    | 173 (161 to 185)                                                | 1 (1 to 1)                    | 53 (38 to 68)                                               |
| Northern Mariana Islands            | 5 (4 to 6)                    | 12 (10 to 16)                                               | 95 (88 to 104)                | 239 (223 to 258)                                                | 29 (21 to 38)                 | 71 (51 to 92)                                               |
| Palau                               | 2 (1 to 2)                    | 14 (11 to 18)                                               | 32 (30 to 34)                 | 233 (217 to 252)                                                | 10 (7 to 13)                  | 72 (51 to 93)                                               |
| Papua New Guinea                    | 154 (122 to 200)              | 5 (4 to 6)                                                  | 2311 (2175 to 2472)           | 74 (70 to 79)                                                   | 882 (641 to 1113)             | 28 (20 to 35)                                               |
| Samoa                               | 8 (6 to 11)                   | 6 (4 to 8)                                                  | 104 (97 to 112)               | 84 (79 to 90)                                                   | 37 (26 to 47)                 | 29 (21 to 37)                                               |
| Solomon Islands                     | 13 (11 to 16)                 | 5 (4 to 6)                                                  | 202 (181 to 234)              | 83 (75 to 94)                                                   | 75 (54 to 99)                 | 30 (22 to 39)                                               |
| Tokelau                             | 0 (0 to 0)                    | 7 (6 to 10)                                                 | 2 (2 to 2)                    | 150 (140 to 160)                                                | 1 (1 to 1)                    | 53 (38 to 67)                                               |
| Tonga                               | 3 (3 to 4)                    | 4 (3 to 5)                                                  | 58 (54 to 62)                 | 78 (73 to 84)                                                   | 20 (14 to 26)                 | 27 (19 to 35)                                               |
| Tuvalu                              | 1 (0 to 1)                    | 8 (6 to 10)                                                 | 12 (11 to 12)                 | 140 (132 to 149)                                                | 4 (3 to 5)                    | 50 (36 to 63)                                               |
| Vanuatu                             | 4 (4 to 6)                    | 3 (3 to 4)                                                  | 91 (80 to 110)                | 78 (69 to 93)                                                   | 34 (24 to 46)                 | 29 (20 to 38)                                               |
| <b>North Africa and Middle East</b> | 42700 (28665 to 64843)        | 14 (9 to 21)                                                | 761978 (412124 to 1681726)    | 252 (145 to 518)                                                | 304143 (139079 to 722558)     | 97 (48 to 219)                                              |
| <b>North Africa and Middle East</b> | 42700 (28665 to 64843)        | 14 (9 to 21)                                                | 761978 (412124 to 1681726)    | 252 (145 to 518)                                                | 304143 (139079 to 722558)     | 97 (48 to 219)                                              |



1  
2  
3  
4  
5  
6  
7  
8  
9  
10  
11  
12  
13  
14  
15  
16  
17  
18  
19  
20  
21  
22  
23  
24  
25  
26  
27  
28  
29  
30  
31  
32  
33  
34  
35  
36  
37  
38  
39  
40  
41  
42  
43  
44  
45  
46

|                            | Incidence                     |                                                             | Prevalence                    |                                                                 | YLDs                          |                                                             |
|----------------------------|-------------------------------|-------------------------------------------------------------|-------------------------------|-----------------------------------------------------------------|-------------------------------|-------------------------------------------------------------|
|                            | Numbers<br>(95% UI)<br>(1990) | Age-standardized<br>rates per 100,000<br>(95% UI)<br>(1990) | Numbers<br>(95% UI)<br>(1990) | Age-standardized<br>estimates per 100,000<br>(95% UI)<br>(1990) | Numbers<br>(95% UI)<br>(1990) | Age-standardized<br>rates per 100,000<br>(95% UI)<br>(1990) |
| Afghanistan                | 1241 (577 to 2984)            | 11 (5 to 25)                                                | 170410 (21376 to 675039)      | 1558 (216 to 6103)                                              | 76762 (9561 to 311279)        | 694 (91 to 2785)                                            |
| Algeria                    | 1191 (957 to 1500)            | 5 (4 to 6)                                                  | 25519 (23487 to 27768)        | 133 (124 to 145)                                                | 8738 (6214 to 11266)          | 45 (32 to 57)                                               |
| Bahrain                    | 21 (17 to 27)                 | 4 (4 to 5)                                                  | 549 (503 to 619)              | 118 (109 to 133)                                                | 191 (136 to 251)              | 40 (29 to 52)                                               |
| Egypt                      | 1923 (1536 to 2429)           | 4 (3 to 5)                                                  | 40374 (38033 to 43009)        | 88 (83 to 93)                                                   | 14451 (10269 to 18383)        | 31 (22 to 39)                                               |
| Iran (Islamic Republic of) | 24800 (13327 to 45554)        | 51 (26 to 95)                                               | 153375 (88594 to 316280)      | 333 (200 to 673)                                                | 58541 (29148 to 128645)       | 122 (63 to 265)                                             |
| Iraq                       | 1862 (1081 to 3507)           | 11 (6 to 19)                                                | 141309 (44811 to 400279)      | 905 (308 to 2513)                                               | 59709 (18003 to 169919)       | 370 (113 to 1039)                                           |
| Jordan                     | 143 (118 to 173)              | 4 (3 to 5)                                                  | 2840 (2672 to 3012)           | 106 (100 to 112)                                                | 973 (690 to 1251)             | 36 (25 to 45)                                               |
| Kuwait                     | 702 (234 to 1879)             | 36 (12 to 97)                                               | 2499 (2200 to 3098)           | 159 (143 to 190)                                                | 810 (547 to 1160)             | 50 (34 to 68)                                               |
| Lebanon                    | 547 (234 to 1362)             | 16 (7 to 40)                                                | 24895 (6752 to 81123)         | 804 (228 to 2582)                                               | 10077 (2378 to 32728)         | 322 (78 to 1057)                                            |
| Libya                      | 186 (150 to 231)              | 5 (4 to 6)                                                  | 5625 (4142 to 9380)           | 168 (134 to 249)                                                | 2072 (1260 to 3768)           | 60 (39 to 98)                                               |
| Morocco                    | 1146 (938 to 1394)            | 5 (4 to 6)                                                  | 27077 (24049 to 33304)        | 128 (116 to 152)                                                | 10116 (7230 to 13770)         | 47 (34 to 63)                                               |
| Oman                       | 111 (87 to 142)               | 7 (5 to 9)                                                  | 2197 (2040 to 2360)           | 147 (137 to 157)                                                | 739 (530 to 954)              | 48 (35 to 62)                                               |

1  
2  
3  
4  
5  
6  
7  
8  
9  
10  
11  
12  
13  
14  
15  
16  
17  
18  
19  
20  
21  
22  
23  
24  
25  
26  
27  
28  
29  
30  
31  
32  
33  
34  
35  
36  
37  
38  
39  
40  
41  
42  
43  
44  
45  
46

|                      | Incidence                     |                                                             | Prevalence                    |                                                                 | YLDs                          |                                                             |
|----------------------|-------------------------------|-------------------------------------------------------------|-------------------------------|-----------------------------------------------------------------|-------------------------------|-------------------------------------------------------------|
|                      | Numbers<br>(95% UI)<br>(1990) | Age-standardized<br>rates per 100,000<br>(95% UI)<br>(1990) | Numbers<br>(95% UI)<br>(1990) | Age-standardized<br>estimates per 100,000<br>(95% UI)<br>(1990) | Numbers<br>(95% UI)<br>(1990) | Age-standardized<br>rates per 100,000<br>(95% UI)<br>(1990) |
| Palestine            | 357 (142 to 926)              | 16 (7 to 41)                                                | 13014 (4565 to 34264)         | 701 (271 to 1799)                                               | 5353 (1742 to 14840)          | 283 (97 to 746)                                             |
| Qatar                | 32 (26 to 39)                 | 7 (6 to 9)                                                  | 757 (704 to 818)              | 172 (162 to 185)                                                | 255 (183 to 323)              | 57 (41 to 71)                                               |
| Saudi Arabia         | 1214 (999 to 1476)            | 9 (7 to 11)                                                 | 23679 (22193 to 25441)        | 202 (189 to 216)                                                | 8009 (5687 to 10303)          | 66 (48 to 85)                                               |
| Sudan                | 3034 (1646 to 6333)           | 16 (9 to 32)                                                | 32065 (26718 to 44313)        | 208 (179 to 272)                                                | 12460 (8534 to 19490)         | 79 (56 to 116)                                              |
| Syrian Arab Republic | 474 (388 to 577)              | 4 (3 to 5)                                                  | 16275 (9261 to 39605)         | 157 (99 to 352)                                                 | 6334 (2931 to 15535)          | 59 (31 to 139)                                              |
| Tunisia              | 365 (295 to 449)              | 5 (4 to 6)                                                  | 8279 (7740 to 9006)           | 120 (112 to 130)                                                | 2730 (1975 to 3497)           | 39 (28 to 50)                                               |
| Turkey               | 2725 (2128 to 3708)           | 5 (4 to 6)                                                  | 52416 (49089 to 56145)        | 102 (96 to 109)                                                 | 18251 (13258 to 23147)        | 35 (25 to 45)                                               |
| United Arab Emirates | 102 (82 to 127)               | 6 (5 to 7)                                                  | 2490 (2314 to 2700)           | 140 (132 to 151)                                                | 880 (633 to 1129)             | 48 (35 to 61)                                               |
| Yemen                | 495 (404 to 603)              | 4 (3 to 5)                                                  | 15821 (10321 to 29852)        | 149 (108 to 252)                                                | 6487 (3619 to 13350)          | 59 (36 to 109)                                              |
| <b>South Asia</b>    | 81527 (64240 to 103563)       | 9 (7 to 11)                                                 | 1313358 (1235439 to 1395741)  | 153 (145 to 162)                                                | 494741 (363959 to 612135)     | 56 (42 to 70)                                               |
| <b>South Asia</b>    | 81527 (64240 to 103563)       | 9 (7 to 11)                                                 | 1313358 (1235439 to 1395741)  | 153 (145 to 162)                                                | 494741 (363959 to 612135)     | 56 (42 to 70)                                               |
| Bangladesh           | 4734 (3645 to 6205)           | 5 (4 to 6)                                                  | 84744 (77080 to 94106)        | 105 (97 to 115)                                                 | 32876 (23818 to 42290)        | 40 (29 to 51)                                               |

1  
2  
3  
4  
5  
6  
7  
8  
9  
10  
11  
12  
13  
14  
15  
16  
17  
18  
19  
20  
21  
22  
23  
24  
25  
26  
27  
28  
29  
30  
31  
32  
33  
34  
35  
36  
37  
38  
39  
40  
41  
42  
43  
44  
45  
46

|                                    | Incidence                     |                                                             | Prevalence                    |                                                                 | YLDs                          |                                                             |
|------------------------------------|-------------------------------|-------------------------------------------------------------|-------------------------------|-----------------------------------------------------------------|-------------------------------|-------------------------------------------------------------|
|                                    | Numbers<br>(95% UI)<br>(1990) | Age-standardized<br>rates per 100,000<br>(95% UI)<br>(1990) | Numbers<br>(95% UI)<br>(1990) | Age-standardized<br>estimates per 100,000<br>(95% UI)<br>(1990) | Numbers<br>(95% UI)<br>(1990) | Age-standardized<br>rates per 100,000<br>(95% UI)<br>(1990) |
| Bhutan                             | 29 (22 to 39)                 | 6 (4 to 7)                                                  | 509 (475 to 545)              | 115 (108 to 123)                                                | 201 (144 to 251)              | 45 (32 to 56)                                               |
| India                              | 71333 (56267 to 91142)        | 10 (8 to 13)                                                | 1134037 (1065345 to 1209041)  | 166 (157 to 177)                                                | 425838 (312874 to 527008)     | 61 (45 to 75)                                               |
| Nepal                              | 1039 (854 to 1257)            | 6 (5 to 8)                                                  | 17788 (16718 to 19069)        | 121 (115 to 129)                                                | 6953 (5034 to 8814)           | 47 (34 to 58)                                               |
| Pakistan                           | 4392 (3396 to 5692)           | 5 (4 to 6)                                                  | 76281 (71641 to 80906)        | 95 (89 to 101)                                                  | 28874 (21063 to 36036)        | 35 (26 to 44)                                               |
| <b>Sub-Saharan Africa</b>          | 79036 (42497 to 164850)       | 18 (10 to 34)                                               | 711974 (573802 to 1072304)    | 193 (164 to 265)                                                | 285149 (188516 to 479224)     | 75 (52 to 119)                                              |
| <b>Southern Sub-Saharan Africa</b> | 4607 (3525 to 6118)           | 10 (8 to 14)                                                | 88483 (81203 to 100702)       | 214 (198 to 239)                                                | 31705 (22957 to 40483)        | 75 (54 to 95)                                               |
| Botswana                           | 93 (73 to 120)                | 9 (7 to 11)                                                 | 1540 (1432 to 1663)           | 157 (147 to 169)                                                | 561 (412 to 719)              | 56 (41 to 71)                                               |
| Eswatini                           | 50 (40 to 65)                 | 8 (6 to 10)                                                 | 853 (795 to 913)              | 154 (145 to 165)                                                | 321 (232 to 406)              | 57 (41 to 71)                                               |
| Lesotho                            | 123 (97 to 155)               | 8 (6 to 10)                                                 | 2067 (1925 to 2219)           | 146 (136 to 156)                                                | 788 (562 to 993)              | 55 (39 to 68)                                               |
| Namibia                            | 103 (79 to 135)               | 9 (7 to 12)                                                 | 3028 (2000 to 5729)           | 260 (184 to 449)                                                | 1241 (695 to 2583)            | 104 (62 to 200)                                             |
| South Africa                       | 3579 (2694 to 4822)           | 11 (8 to 15)                                                | 70255 (64677 to 80330)        | 232 (214 to 261)                                                | 24873 (17886 to 31878)        | 81 (58 to 103)                                              |
| Zimbabwe                           | 659 (524 to 828)              | 9 (7 to 11)                                                 | 10739 (9999 to 11655)         | 151 (142 to 163)                                                | 3920 (2824 to 5003)           | 54 (38 to 68)                                               |
| <b>Western Sub-Saharan Africa</b>  | 16168 (11877 to 22347)        | 11 (8 to 15)                                                | 246022 (228652 to 265737)     | 183 (171 to 197)                                                | 92325 (67628 to 115005)       | 67 (49 to 84)                                               |

1  
2  
3  
4  
5  
6  
7  
8  
9  
10  
11  
12  
13  
14  
15  
16  
17  
18  
19  
20  
21  
22  
23  
24  
25  
26  
27  
28  
29  
30  
31  
32  
33  
34  
35  
36  
37  
38  
39  
40  
41  
42  
43  
44  
45  
46

|               | Incidence                     |                                                             | Prevalence                    |                                                                 | YLDs                          |                                                             |
|---------------|-------------------------------|-------------------------------------------------------------|-------------------------------|-----------------------------------------------------------------|-------------------------------|-------------------------------------------------------------|
|               | Numbers<br>(95% UI)<br>(1990) | Age-standardized<br>rates per 100,000<br>(95% UI)<br>(1990) | Numbers<br>(95% UI)<br>(1990) | Age-standardized<br>estimates per 100,000<br>(95% UI)<br>(1990) | Numbers<br>(95% UI)<br>(1990) | Age-standardized<br>rates per 100,000<br>(95% UI)<br>(1990) |
| Benin         | 367 (272 to 500)              | 11 (8 to 15)                                                | 5790 (5410 to 6173)           | 187 (175 to 199)                                                | 2223 (1613 to 2804)           | 70 (51 to 88)                                               |
| Burkina Faso  | 704 (520 to 961)              | 10 (8 to 14)                                                | 10229 (9563 to 10973)         | 161 (151 to 173)                                                | 3910 (2830 to 4923)           | 60 (44 to 76)                                               |
| Cabo Verde    | 26 (20 to 34)                 | 9 (7 to 11)                                                 | 482 (452 to 515)              | 187 (176 to 200)                                                | 172 (123 to 217)              | 66 (48 to 83)                                               |
| Cameroon      | 879 (632 to 1227)             | 12 (8 to 17)                                                | 15328 (14138 to 16623)        | 219 (202 to 236)                                                | 5866 (4309 to 7377)           | 82 (60 to 103)                                              |
| Chad          | 620 (398 to 1058)             | 13 (8 to 20)                                                | 10278 (7050 to 18421)         | 231 (170 to 381)                                                | 4323 (2513 to 8625)           | 95 (59 to 174)                                              |
| Côte d'Ivoire | 934 (689 to 1281)             | 11 (8 to 16)                                                | 14611 (13535 to 15712)        | 183 (171 to 196)                                                | 5561 (3972 to 6998)           | 68 (49 to 84)                                               |
| Gambia        | 65 (49 to 87)                 | 9 (7 to 13)                                                 | 1241 (1073 to 1596)           | 187 (166 to 230)                                                | 487 (342 to 711)              | 71 (51 to 97)                                               |
| Ghana         | 1226 (880 to 1713)            | 11 (8 to 15)                                                | 21026 (19340 to 22809)        | 201 (186 to 217)                                                | 7883 (5582 to 9921)           | 74 (53 to 93)                                               |
| Guinea        | 475 (354 to 645)              | 10 (7 to 13)                                                | 7872 (7352 to 8437)           | 177 (166 to 190)                                                | 3086 (2202 to 3879)           | 68 (49 to 85)                                               |
| Guinea-Bissau | 92 (65 to 131)                | 12 (9 to 17)                                                | 1353 (1241 to 1470)           | 194 (178 to 210)                                                | 541 (393 to 678)              | 76 (55 to 95)                                               |
| Liberia       | 1272 (356 to 3721)            | 68 (20 to 187)                                              | 2948 (2450 to 4176)           | 195 (167 to 258)                                                | 1189 (810 to 1884)            | 77 (54 to 113)                                              |
| Mali          | 832 (585 to 1265)             | 12 (9 to 18)                                                | 10345 (9609 to 11118)         | 172 (161 to 185)                                                | 4043 (2894 to 5063)           | 66 (47 to 83)                                               |
| Mauritania    | 213 (150 to 304)              | 13 (9 to 19)                                                | 3502 (3209 to 3805)           | 241 (221 to 262)                                                | 1351 (979 to 1701)            | 92 (67 to 116)                                              |

1  
2  
3  
4  
5  
6  
7  
8  
9  
10  
11  
12  
13  
14  
15  
16  
17  
18  
19  
20  
21  
22  
23  
24  
25  
26  
27  
28  
29  
30  
31  
32  
33  
34  
35  
36  
37  
38  
39  
40  
41  
42  
43  
44  
45  
46

|                                   | Incidence                     |                                                             | Prevalence                    |                                                                 | YLDs                          |                                                             |
|-----------------------------------|-------------------------------|-------------------------------------------------------------|-------------------------------|-----------------------------------------------------------------|-------------------------------|-------------------------------------------------------------|
|                                   | Numbers<br>(95% UI)<br>(1990) | Age-standardized<br>rates per 100,000<br>(95% UI)<br>(1990) | Numbers<br>(95% UI)<br>(1990) | Age-standardized<br>estimates per 100,000<br>(95% UI)<br>(1990) | Numbers<br>(95% UI)<br>(1990) | Age-standardized<br>rates per 100,000<br>(95% UI)<br>(1990) |
| Niger                             | 626 (467 to 851)              | 11 (8 to 15)                                                | 8807 (8185 to 9456)           | 174 (163 to 186)                                                | 3532 (2571 to 4467)           | 68 (50 to 85)                                               |
| Nigeria                           | 6673 (5070 to 8794)           | 10 (7 to 13)                                                | 113598 (105957 to 122265)     | 175 (165 to 189)                                                | 41034 (29577 to 51422)        | 62 (45 to 78)                                               |
| Sao Tome and Principe             | 10 (8 to 13)                  | 11 (8 to 14)                                                | 178 (165 to 192)              | 209 (196 to 224)                                                | 67 (48 to 85)                 | 78 (56 to 98)                                               |
| Senegal                           | 578 (428 to 786)              | 10 (8 to 14)                                                | 8905 (8247 to 9569)           | 177 (164 to 190)                                                | 3421 (2430 to 4303)           | 66 (47 to 84)                                               |
| Sierra Leone                      | 280 (207 to 382)              | 10 (7 to 13)                                                | 4598 (4290 to 4915)           | 171 (160 to 183)                                                | 1766 (1285 to 2206)           | 65 (48 to 81)                                               |
| Togo                              | 295 (211 to 412)              | 11 (8 to 15)                                                | 4922 (4539 to 5336)           | 208 (193 to 224)                                                | 1867 (1351 to 2362)           | 77 (55 to 97)                                               |
| <b>Eastern Sub-Saharan Africa</b> | 54804 (22784 to 133741)       | 30 (14 to 69)                                               | 322647 (219213 to 603862)     | 216 (159 to 366)                                                | 137377 (79383 to 292137)      | 89 (55 to 175)                                              |
| Burundi                           | 237 (182 to 307)              | 5 (4 to 7)                                                  | 3190 (2954 to 3414)           | 78 (73 to 83)                                                   | 1295 (929 to 1654)            | 31 (23 to 39)                                               |
| Comoros                           | 49 (35 to 68)                 | 13 (9 to 18)                                                | 838 (775 to 905)              | 252 (234 to 271)                                                | 334 (246 to 421)              | 99 (72 to 125)                                              |
| Djibouti                          | 61 (40 to 98)                 | 15 (11 to 24)                                               | 754 (692 to 822)              | 230 (214 to 249)                                                | 297 (215 to 375)              | 88 (64 to 111)                                              |
| Eritrea                           | 3433 (819 to 10266)           | 112 (30 to 330)                                             | 27056 (7937 to 76851)         | 967 (318 to 2678)                                               | 12654 (3458 to 39163)         | 444 (132 to 1272)                                           |
| Ethiopia                          | 38357 (10931 to 107247)       | 72 (22 to 190)                                              | 75914 (41139 to 165521)       | 171 (105 to 344)                                                | 34524 (16633 to 80823)        | 75 (40 to 161)                                              |
| Kenya                             | 858 (681 to 1054)             | 5 (4 to 6)                                                  | 13839 (12959 to 14779)        | 89 (84 to 94)                                                   | 5256 (3826 to 6541)           | 33 (24 to 41)                                               |

1  
2  
3  
4  
5  
6  
7  
8  
9  
10  
11  
12  
13  
14  
15  
16  
17  
18  
19  
20  
21  
22  
23  
24  
25  
26  
27  
28  
29  
30  
31  
32  
33  
34  
35  
36  
37  
38  
39  
40  
41  
42  
43  
44  
45  
46

|                                   | Incidence                     |                                                             | Prevalence                    |                                                                 | YLDs                          |                                                             |
|-----------------------------------|-------------------------------|-------------------------------------------------------------|-------------------------------|-----------------------------------------------------------------|-------------------------------|-------------------------------------------------------------|
|                                   | Numbers<br>(95% UI)<br>(1990) | Age-standardized<br>rates per 100,000<br>(95% UI)<br>(1990) | Numbers<br>(95% UI)<br>(1990) | Age-standardized<br>estimates per 100,000<br>(95% UI)<br>(1990) | Numbers<br>(95% UI)<br>(1990) | Age-standardized<br>rates per 100,000<br>(95% UI)<br>(1990) |
| Madagascar                        | 1106 (812 to 1516)            | 11 (8 to 16)                                                | 18232 (16806 to 19829)        | 214 (198 to 232)                                                | 7170 (5120 to 8972)           | 83 (59 to 103)                                              |
| Malawi                            | 750 (563 to 1004)             | 10 (8 to 14)                                                | 11285 (10462 to 12176)        | 164 (154 to 177)                                                | 4380 (3111 to 5585)           | 62 (45 to 79)                                               |
| Mozambique                        | 1885 (1194 to 3430)           | 17 (11 to 29)                                               | 49506 (25560 to 115606)       | 456 (259 to 995)                                                | 21792 (9745 to 57111)         | 196 (97 to 475)                                             |
| Rwanda                            | 1598 (867 to 3273)            | 25 (14 to 48)                                               | 12008 (10930 to 13304)        | 235 (215 to 256)                                                | 4886 (3490 to 6178)           | 93 (67 to 117)                                              |
| Somalia                           | 1386 (691 to 3196)            | 22 (12 to 47)                                               | 11992 (8174 to 33180)         | 218 (161 to 518)                                                | 5141 (2845 to 14541)          | 91 (54 to 224)                                              |
| South Sudan                       | 550 (404 to 749)              | 12 (9 to 17)                                                | 12203 (9589 to 18634)         | 279 (231 to 394)                                                | 5006 (3293 to 8245)           | 111 (77 to 173)                                             |
| Uganda                            | 1664 (1208 to 2433)           | 12 (9 to 17)                                                | 42654 (22535 to 100043)       | 305 (177 to 675)                                                | 18110 (8333 to 46907)         | 125 (62 to 297)                                             |
| United Republic of Tanzania       | 2217 (1681 to 2959)           | 11 (8 to 15)                                                | 34334 (31696 to 36935)        | 189 (176 to 203)                                                | 13056 (9286 to 16460)         | 70 (51 to 88)                                               |
| Zambia                            | 612 (472 to 798)              | 10 (8 to 14)                                                | 8607 (7922 to 9298)           | 158 (148 to 170)                                                | 3375 (2402 to 4242)           | 61 (44 to 75)                                               |
| <b>Central Sub-Saharan Africa</b> | 3457 (2080 to 6799)           | 7 (4 to 12)                                                 | 54823 (33715 to 110269)       | 118 (79 to 217)                                                 | 23742 (12722 to 50625)        | 50 (29 to 97)                                               |
| Angola                            | 1919 (702 to 5157)            | 18 (7 to 46)                                                | 32214 (11520 to 87247)        | 330 (131 to 869)                                                | 14892 (5002 to 40955)         | 150 (55 to 393)                                             |

1  
2  
3  
4  
5  
6  
7  
8  
9  
10  
11  
12  
13  
14  
15  
16  
17

|                                     | Incidence                     |                                                             | Prevalence                    |                                                                 | YLDs                          |                                                             |
|-------------------------------------|-------------------------------|-------------------------------------------------------------|-------------------------------|-----------------------------------------------------------------|-------------------------------|-------------------------------------------------------------|
|                                     | Numbers<br>(95% UI)<br>(1990) | Age-standardized<br>rates per 100,000<br>(95% UI)<br>(1990) | Numbers<br>(95% UI)<br>(1990) | Age-standardized<br>estimates per 100,000<br>(95% UI)<br>(1990) | Numbers<br>(95% UI)<br>(1990) | Age-standardized<br>rates per 100,000<br>(95% UI)<br>(1990) |
| Central African Republic            | 83 (67 to 104)                | 4 (3 to 5)                                                  | 1161 (1082 to 1243)           | 55 (52 to 58)                                                   | 469 (339 to 604)              | 22 (16 to 28)                                               |
| Congo                               | 79 (62 to 101)                | 4 (3 to 5)                                                  | 1171 (1094 to 1254)           | 63 (60 to 68)                                                   | 460 (331 to 594)              | 24 (18 to 31)                                               |
| Democratic Republic of the<br>Congo | 1324 (1018 to<br>1742)        | 4 (3 to 5)                                                  | 19452 (18069 to<br>20914)     | 69 (65 to 74)                                                   | 7603 (5389 to<br>9605)        | 27 (19 to 33)                                               |
| Equatorial Guinea                   | 14 (11 to 17)                 | 4 (3 to 5)                                                  | 195 (182 to 209)              | 61 (58 to 65)                                                   | 80 (57 to 100)                | 24 (18 to 31)                                               |
| Gabon                               | 37 (29 to 48)                 | 4 (4 to 6)                                                  | 631 (593 to 673)              | 81 (77 to 86)                                                   | 237 (173 to 302)              | 30 (22 to 38)                                               |

18 Abbreviations: YLDs, years lived with disability; UI, uncertainty interval

19  
20  
21  
22  
23  
24  
25  
26  
27  
28  
29  
30  
31  
32  
33  
34  
35  
36  
37  
38  
39  
40  
41  
42  
43  
44  
45  
46

# BMJ Open

## Global, regional, and national burden of traumatic brain injury and spinal cord injury, 1990–2019: a systematic analysis for the Global Burden of Disease Study 2019

|                                 |                                                                                                                                                                                                                                                                                                                                                                                                                                                                                           |
|---------------------------------|-------------------------------------------------------------------------------------------------------------------------------------------------------------------------------------------------------------------------------------------------------------------------------------------------------------------------------------------------------------------------------------------------------------------------------------------------------------------------------------------|
| Journal:                        | <i>BMJ Open</i>                                                                                                                                                                                                                                                                                                                                                                                                                                                                           |
| Manuscript ID                   | bmjopen-2023-075049.R1                                                                                                                                                                                                                                                                                                                                                                                                                                                                    |
| Article Type:                   | Original research                                                                                                                                                                                                                                                                                                                                                                                                                                                                         |
| Date Submitted by the Author:   | 14-Aug-2023                                                                                                                                                                                                                                                                                                                                                                                                                                                                               |
| Complete List of Authors:       | Guan, Bin; Shandong University Cheeloo College of Medicine<br>Anderson, David; The University of Sydney Faculty of Medicine and Health<br>Chen, Lingxiao; Shandong University Cheeloo College of Medicine; The University of Sydney Faculty of Medicine and Health<br>Feng, Shiqing; Shandong University Cheeloo College of Medicine; The Second Hospital of Shandong University<br>Zhou, Hengxing; Shandong University Cheeloo College of Medicine; Qilu Hospital of Shandong University |
| <b>Primary Subject Heading</b>: | Neurology                                                                                                                                                                                                                                                                                                                                                                                                                                                                                 |
| Secondary Subject Heading:      | Epidemiology, Global health, Neurology, Public health                                                                                                                                                                                                                                                                                                                                                                                                                                     |
| Keywords:                       | EPIDEMIOLOGY, NEUROLOGY, ORTHOPAEDIC & TRAUMA SURGERY, PUBLIC HEALTH                                                                                                                                                                                                                                                                                                                                                                                                                      |
|                                 |                                                                                                                                                                                                                                                                                                                                                                                                                                                                                           |

SCHOLARONE™  
Manuscripts





I, the Submitting Author has the right to grant and does grant on behalf of all authors of the Work (as defined in the below author licence), an exclusive licence and/or a non-exclusive licence for contributions from authors who are: i) UK Crown employees; ii) where BMJ has agreed a CC-BY licence shall apply, and/or iii) in accordance with the terms applicable for US Federal Government officers or employees acting as part of their official duties; on a worldwide, perpetual, irrevocable, royalty-free basis to BMJ Publishing Group Ltd ("BMJ") its licensees and where the relevant Journal is co-owned by BMJ to the co-owners of the Journal, to publish the Work in this journal and any other BMJ products and to exploit all rights, as set out in our [licence](#).

The Submitting Author accepts and understands that any supply made under these terms is made by BMJ to the Submitting Author unless you are acting as an employee on behalf of your employer or a postgraduate student of an affiliated institution which is paying any applicable article publishing charge ("APC") for Open Access articles. Where the Submitting Author wishes to make the Work available on an Open Access basis (and intends to pay the relevant APC), the terms of reuse of such Open Access shall be governed by a Creative Commons licence – details of these licences and which [Creative Commons](#) licence will apply to this Work are set out in our licence referred to above.

Other than as permitted in any relevant BMJ Author's Self Archiving Policies, I confirm this Work has not been accepted for publication elsewhere, is not being considered for publication elsewhere and does not duplicate material already published. I confirm all authors consent to publication of this Work and authorise the granting of this licence.

1  
2  
3 **1 Global, regional, and national burden of traumatic brain injury and spinal cord injury,**  
4  
5 **2 1990–2019: a systematic analysis for the Global Burden of Disease Study 2019**  
6  
7  
8  
9

10 4 Bin Guan MBBS<sup>1\*</sup>, David B. Anderson PhD<sup>2\*</sup>, Lingxiao Chen PhD<sup>1,3c†</sup>, Shiqing Feng  
11  
12 MD<sup>1,4b†</sup>, Hengxing Zhou MD<sup>1a†</sup>  
13  
14  
15  
16  
17

18 7 <sup>1</sup>Department of Orthopaedics, Qilu Hospital of Shandong University, Shandong University  
19  
20 8 Centre for Orthopaedics, Advanced Medical Research Institute, Cheeloo College of Medicine,  
21  
22 Shandong University, Jinan, Shandong, 250012, P.R. China.  
23  
24  
25

26 10 <sup>2</sup>School of Health Sciences, Faculty of Medicine and Health, University of Sydney, New  
27  
28 South Wales, Australia.  
29  
30

31 12 <sup>3</sup>Sydney Musculoskeletal Health, The Kolling Institute, Faculty of Medicine and Health,  
32  
33 University of Sydney, Sydney, NSW, Australia  
34  
35

36 14 <sup>4</sup>The Second Hospital of Shandong University, Cheeloo College of Medicine, Shandong  
37  
38 University, Jinan, Shandong, 250012, P.R. China.  
39  
40  
41

42 16  
43  
44 17 \*Bin Guan and David B. Anderson contributed equally to this work.  
45

46  
47 18 †Hengxing Zhou, Shiqing Feng, and Lingxiao Chen were designated as co-corresponding  
48  
49 authors.  
50  
51

52 20  
53  
54 21 <sup>a</sup>Email address for Hengxing Zhou: zhouhengxing@sdu.edu.cn  
55  
56

57 22 <sup>b</sup>Email address for Shiqing Feng: shiqingfeng@sdu.edu.cn  
58  
59  
60

1  
2  
3  
4  
5  
6  
7  
8  
9  
10  
11  
12  
13  
14  
15  
16  
17  
18  
19  
20  
21  
22  
23  
24  
25  
26  
27  
28  
29  
30  
31  
32  
33  
34  
35  
36  
37  
38  
39  
40  
41  
42  
43  
44  
45  
46  
47  
48  
49  
50  
51  
52  
53  
54  
55  
56  
57  
58  
59  
60

23   <sup>e</sup>Email address for Lingxiao Chen: [lche4036@uni.sydney.edu.au](mailto:lche4036@uni.sydney.edu.au)

For peer review only

1  
2  
3 24 **Title**  
4  
5  
6 25  
7

8 26 Global, regional, and national burden of traumatic brain injury and spinal cord injury, 1990–  
9  
10 27 2019: a systematic analysis for the Global Burden of Disease Study 2019  
11  
12  
13 28

15  
16 29 **Abstract**  
17  
18 30

21 31 **Objectives:** To evaluate the most up-to-date burden of traumatic brain injury (TBI) and spinal  
22  
23 32 cord injury (SCI) and analyze their leading causes in different countries/territories.  
24  
25  
26 33

28  
29 34 **Design:** An analysis of Global Burden of Disease (GBD) data.  
30  
31 35

33  
34 36 **Setting:** The epidemiologic data were gathered from GBD Results Tool (January 1,  
35  
36 37 1990–December 31, 2019) covering 21 GBD regions and 204 countries/ territories.  
38  
39 38

41  
42 39 **Participants:** Patients with TBI/SCI.  
43  
44 40

46  
47 41 **Main outcomes and measures:** Absolute numbers and age-standardized rates/estimates of  
48  
49 42 incidence, prevalence, and years lived with disability (YLDs) of TBI/SCI by location in 2019,  
50  
51 43 with their percentage changes from 1990 to 2019. The leading causes (e.g., falls) of TBI/SCI  
52  
53 44 in 204 countries/territories.  
54  
55 45

56  
57  
58  
59  
60

1  
2  
3 46 **Results:** Globally, in 2019, TBI had 27.16 million new cases, 48.99 million prevalent cases,  
4  
5 47 and 7.08 million YLDs. SCI had 0.91 million new cases, 20.64 million prevalent cases, and  
6  
7 48 6.20 million YLDs. Global age-standardized incidence rates of TBI decreased significantly by  
8  
9 49 -5.5% (95% uncertainty interval, -8.9% to -3.0%) from 1990 to 2019, whereas SCI had no  
10  
11 50 significant change (-6.1% [-17.3% to 1.5%]). Regionally, in 2019, Eastern Europe and High-  
12  
13 51 income North America had the highest burden of TBI and SCI, respectively. Nationally, in  
14  
15 52 2019, Slovenia and Afghanistan had the highest age-standardized incidence rates of TBI and  
16  
17 53 SCI, respectively. For TBI, falls was the leading cause in 74% (150/204) of  
18  
19 54 countries/territories, followed by pedestrian road injuries (14%, 29/204), motor vehicle road  
20  
21 55 injuries (5%, 11/204), and conflict and terrorism (2%, 4/204). For SCI, falls was the leading  
22  
23 56 cause in 97% (198/204) of countries/territories, followed by conflict and terrorism (3%,  
24  
25 57 6/204).

26  
27 58  
28  
29 59 **Conclusions:** Global age-standardized incidence rates of TBI have decreased significantly  
30  
31 60 since 1990, whereas SCI had no significant change. The leading causes of TBI/SCI globally  
32  
33 61 were falls, but variations did exist between countries/territories. Policymakers should continue  
34  
35 62 to prioritize interventions to reduce falls, but priorities may vary between countries/territories.  
36  
37 63

#### 38 39 64 **Strengths and Limitations of This Study**

- 40  
41 65
- 42 66 ● One of the strengths of this study was that it provided the most up-to-date global,  
43  
44 67 regional, and national burden of TBI/SCI from 1990 to 2019.
- 45  
46  
47  
48  
49  
50  
51  
52  
53  
54  
55  
56  
57  
58  
59  
60

68

69 ● Another strength of this study was that it presented the variations of leading causes of  
70 TBI/SCI in 204 countries/territories, which have not been assessed before.

71

72 ● One of the limitations was that this study might underestimate the true incidence and  
73 prevalence of TBI/SCI.

74

75 ● The second limitation was that the estimates of TBI/SCI for some data-sparse  
76 countries/territories in this study should be interpreted carefully.

77

78 ● The third limitation was that this study could not assess associations between risk factors  
79 and TBI/SCI; calculate lifetime prevalence of TBI/SCI through the GBD data.

80

81

## 82 **Introduction**

83

84 Traumatic brain injury (TBI) and spinal cord injury (SCI) continue to pose challenges to the  
85 global public health systems, and the resulting disabilities have brought huge economic  
86 burden to patients, public health systems, and societies [1, 2]. Compared with the previous  
87 Global Burden of Disease (GBD) 2016 Study [3, 4], new available data sources and improved  
88 statistical methods in the GBD 2019 Study led to the GBD 2019 results superseding those

5

1  
2  
3 89 from previous rounds of GBD [5]. Besides, nine additional countries/territories were firstly  
4  
5 90 incorporated in the calculation of disease burden in the GBD 2019 Study [5]. An update on  
6  
7  
8 91 the 2016 results of the burden of TBI/SCI is therefore warranted.  
9

10 92  
11  
12  
13 93 Ding *et al.* reported the burden of SCI at the global and regional levels through the GBD 2019  
14  
15 94 data, but did not mention the disease burden in individual countries/territories [6]. However, it  
16  
17 95 will not allow for identifying variations that can exist between countries/territories within a  
18  
19 96 same world or a same geographical region. Take the previous GBD 2016 Study as an  
20  
21 97 example, the leading cause of TBI in the region, North Africa and Middle East, was  
22  
23 98 concluded to be falls [4]. It was true in Saudi Arabia, whereas it did not reflect the reality in  
24  
25 99 other countries/territories within North Africa and Middle East, such as, Afghanistan, where  
26  
27 100 conflict and terrorism was the leading cause of TBI [4]. Failure to present the data in  
28  
29 101 individual countries/territories can prevent policymakers from identifying which causes  
30  
31 102 should be targeted; wasting resources and reducing effectiveness of any interventions [7].  
32  
33  
34  
35  
36  
37  
38  
39  
40  
41

42 104 Therefore, in this study, we aimed to provide the most up-to-date burden of TBI/SCI through  
43  
44 105 the GBD 2019 data. Also, we analyzed the leading causes of TBI/SCI in 204  
45  
46 106 countries/territories. Finally, the associations between the burden of TBI/SCI and Socio-  
47  
48 107 demographic Index (SDI) in 204 countries/territories was explored.  
49  
50  
51

52 108

## 54 109 **Methods**

56  
57 110  
58  
59  
60

## 111 **Overview**

112

113 This study of global health estimates followed the Guidelines for Accurate and Transparent  
114 Health Estimates Reporting (GATHER) Statement and the Strengthening the Reporting of  
115 Observational Studies in Epidemiology (STROBE) Statement [8, 9]. The GBD 2019 Study  
116 estimated burden of 369 diseases and injuries and 87 risk factors through multiple  
117 epidemiological measures, including incidence, prevalence, mortality, years of life lost  
118 (YLLs), years lived with disability (YLDs), and disability-adjusted life years (DALYs) by  
119 age, sex, cause, year, and location from 1990 to 2019 [5]. Our methods used for estimation of  
120 the burden of TBI and SCI were based on the framework of the GBD 2019 Study, which had  
121 already been described comprehensively elsewhere [5, 10]. Although TBI/SCI could cause  
122 death, they were not defined as a cause-of-death in the GBD 2019 Study [5]. Therefore, in  
123 this study, we provided the burden of TBI/SCI by incidence, prevalence, and YLDs, but not  
124 mortality or YLLs.

125

## 126 **Case Definitions**

127

128 Based on the framework of the GBD 2019 Study [5], the definitions of TBI/SCI in this study  
129 relied on the International Classification of Diseases, Ninth Revision (ICD-9) and the  
130 International Classification of Diseases, Tenth Revision (ICD-10), which had also been  
131 described in details in the previous GBD 2016 Study published in The Lancet Neurology [4].  
132 Additionally, a clarification from the GBD 2019 Study is that TBI/SCI are both defined as a



1  
2  
3 133 nature-of-injury but not a cause-of-injury [5]. For example, TBI/SCI could be caused by a  
4  
5 134 fall, the fall was therefore defined as a cause-of-injury and TBI/SCI as a nature-of-injury.  
6  
7

8 135

9  
10 136 **Data Source**

11  
12  
13 137

14  
15 138 The data for 21 GBD regions and 204 countries/territories between January 1, 1990, and  
16  
17  
18 139 December 31, 2019, were available from the GBD Results Tool  
19  
20  
21 140 (<https://vizhub.healthdata.org/gbd-results/>). The data utilized in this study were from patients  
22  
23  
24 141 requiring medical care in hospital and emergency department records [5]. Furthermore,  
25  
26 142 compared with the GBD 2016 Study, new available data sources were incorporated into  
27  
28  
29 143 estimates of non-fatal injuries in the GBD 2019 iteration, such as injury claims data from the  
30  
31  
32 144 Accident Compensation Corporation in New Zealand, national survey data from China,  
33  
34 145 Ghana, India, Mexico, Russian Federation, and South Africa from the World Health  
35  
36  
37 146 Organization's Study on Global AGEing and Adult Health, and literature studies data from  
38  
39  
40 147 India and South Africa based on inputs from the GBD collaborator network [5]. Each data  
41  
42  
43 148 source was assigned a unique identifier and included in the Global Health Data Exchange  
44  
45 149 (<https://ghdx.healthdata.org/gbd-2019/data-input-sources>). Additionally, considering that  
46  
47 150 there are variations in quality of data by each country and territory, estimates in some data-  
48  
49  
50 151 sparse countries/territories were modelled and predicted by borrowing estimates from data-  
51  
52  
53 152 rich countries/territories [5]. Detailed data sources used to estimate the burden of non-fatal  
54  
55 153 injuries from each country and territory were listed in **eTable 1**. More details of the data  
56  
57  
58 154 sources and model strategies have been published elsewhere [5, 10].  
59  
60

155

## 156 Calculation of Incidence, Prevalence, and Years Lived with Disability

157

158 The features of data processing used to calculate incidence, prevalence, and YLDs in this  
159 study were consistent with the framework of the GBD 2019 Study [5]. First, the data inputs of  
160 different cause-of-injury were incorporated and modelled by a Bayesian meta-regression tool,  
161 DisMod-MR 2.1, to infer the incidence of each cause-of-injury. Second, the GBD severity  
162 hierarchy for nature-of-injury (**eTable 2**) was utilized to establish a point-to-point relationship  
163 between cause-of-injury and nature-of-injury, which means that when multiple nature-of-  
164 injuries were caused by one cause-of-injury, nature-of-injury with the highest rank in the  
165 GBD severity hierarchy was selected to match it. Based on the framework of the GBD 2019  
166 Study [5], because SCI had a higher rank in the GBD severity hierarchy than TBI, SCI was  
167 chosen if both conditions happened to an individual in our study, which was also consistent  
168 with the calculation process of the previous GBD 2016 Study published in The Lancet  
169 Neurology [4]. Third, for the short-term disability (the duration was less than one year), the  
170 prevalence was approximately calculated as the incidence multiplied by the average duration.  
171 For the long-term disability (the duration was more than one year), DisMod-MR 2.1 was  
172 utilized to convert incidence to prevalence. Fourth, the GBD disability weights (**eTable 3**)  
173 were utilized to calculate YLDs. The GBD disability weights were evaluated on a 0–1 scale,  
174 with 0 representing complete health and 1 representing death [11]. For the short-term  
175 disability, YLDs were calculated as the prevalence multiplied by the GBD disability weights.  
176 For the long-term disability, YLDs were calculated with the similar process but adjusted by

1  
2  
3 177 comorbidity correction. Finally, the incidence, prevalence, and YLDs were aggregated to  
4  
5 178 calculate the all-cause incidence, prevalence, and YLDs of TBI/SCI. Due to some sampling  
6  
7  
8 179 errors and non-sampling variances, we calculated the 95% uncertainty interval (UI) using the  
9  
10  
11 180 same methods described previously in the GBD 2019 Study [5]. Generally, UI were from  
12  
13 181 1,000 draw-level estimates for each parameter, and 95% UI were defined by the 25<sup>th</sup> and 975<sup>th</sup>  
14  
15  
16 182 values of the ordered 1,000 estimates.

183

## 184 **Statistical Analysis**

185

186 Firstly, according to the GBD location hierarchy (**eTable 4**) in the GBD 2019 Study [5], we  
187 calculated absolute numbers and age-standardized rates/estimates of incidence, prevalence,  
188 and YLD of TBI/SCI in 21 GBD regions and 204 countries/territories in 2019. The age-  
189 standardized rate/estimate is calculated by  $\frac{\sum_{i=1}^A a_i w_i}{\sum_{i=1}^A w_i}$ , where  $a_i$  is the age-specific rate/estimate  
190 of the age group  $i$ , and  $w_i$  is the weight of the age group  $i$  derived from the GBD 2019 world  
191 population standard (**eTable 5**) [12]. Secondly, based on the framework of the GBD 2019  
192 Study [5], we used percentage changes of age-standardized rates/estimates of incidence,  
193 prevalence, and YLD to calculate trends in the burden of TBI/SCI from 1990 to 2019. If the  
194 95% UI of a percentage change did not include zero, it was determined to be a significant  
195 change, and vice versa [13]. Thirdly, according to the GBD cause hierarchy (**eTable 6**) in the  
196 GBD 2019 Study [5], we analyzed the leading causes (e.g., falls, pedestrian road injuries,  
197 motor vehicle road injuries, conflict and terrorism, etc.) for age-standardized incidence rates  
198 of TBI/SCI in 204 countries/territories in 2019, and we also analyzed trends in age-

1  
2  
3 199 standardized incidence rates of TBI/SCI caused by the leading causes in the corresponding  
4  
5 200 countries/territories from 1990 to 2019 (except three causes: conflict and terrorism, exposure  
6  
7  
8 201 to forces of nature, and executions and police conflict, which were considered as fatal  
9  
10  
11 202 discontinuities and defined as random events due to not having predictable time trends in the  
12  
13 203 GBD 2019 Study [5]). More details about definitions of causes and corresponding ICD-  
14  
15  
16 204 9/ICD-10 codes had already been described elsewhere [5]. Fourthly, based on one prior GBD  
17  
18  
19 205 paper by GBD Fracture Collaborators [14], we reported the top three countries/territories  
20  
21 206 with age-standardized incidence rates caused by each cause, and the top three  
22  
23  
24 207 countries/territories with both the largest increase and the largest decrease to explore potential  
25  
26  
27 208 reasons for their cause-specific disease burden. Finally, considering that the data was non-  
28  
29 209 normal distributed (Shapiro-Wilk test had a p-value equal to  $<0.001$ ), the associations  
30  
31  
32 210 between SDI (a composite indicator of income per capita, years of schooling, and fertility  
33  
34 211 rate; SDI ranges from 0 to 1 in the GBD 2019 Study, where 0 represents the lowest income  
35  
36  
37 212 per capita, the fewest years of schooling, and the highest fertility rate, and vice versa [5],  
38  
39 213 **eTable 7**) and the age-standardized YLD rates in 204 countries/territories in 2019 were  
40  
41  
42 214 analyzed by Spearman correlation tests to examine the effect of SDI on the disease burden  
43  
44  
45 215 [15-17]. All statistical analyses and figures drawing were conducted in R program (version  
46  
47 216 4.1.3) and GraphPad Prism (version 7.0.0). Statistical significance was defined as two-tailed  
48  
49 217  $P<0.05$ .

51  
52 218

## 53 54 219 **Patient and Public Involvement Statement**

55  
56  
57 220  
58  
59  
60

1  
2  
3 221 None.

4  
5 222

6  
7  
8 223 **Results**

9  
10 224

11  
12  
13 225 **Global, Regional, and National Disease Burden**

14  
15  
16 226

17  
18 227 Globally, TBI had 27.16 (95% UI, 23.36 to 31.42) million new cases, 48.99 (46.84 to 51.32)

19  
20 228 million prevalent cases, and 7.08 (5.00 to 9.59) million YLDs in 2019 (**Table 1; eTables 8-**

21  
22 229 **10**). There were 346 (95% UI, 298 to 401) cases per 100,000 population, 599 (573 to 627)

23  
24 230 cases per 100,000 population, and 87 (61 to 117) YLDs per 100,000 population for age-

25  
26 231 standardized incidence rates, age-standardized prevalence estimates, and age-standardized

27  
28 232 YLD rates of TBI in 2019, respectively (**Figure 1; eFigures 1-3**). SCI had 0.91 (0.71 to 1.16)

29  
30 233 million new cases, 20.64 (18.93 to 23.61) million prevalent cases, and 6.20 (4.47 to 8.16)

31  
32 234 million YLDs in 2019 (**Table 2; eTables 11-13**). There were 12 (9 to 15) cases per 100,000

33  
34 235 population, 253 (231 to 290) cases per 100,000 population, and 76 (55 to 100) YLDs per

35  
36 236 100,000 population for age-standardized incidence rates, age-standardized prevalence

37  
38 237 estimates, and age-standardized YLD rates of SCI in 2019, respectively (**eFigures 4-6**).

39  
40 238 Global age-standardized incidence rates of TBI decreased significantly by -5.5% (95% UI, -

41  
42 239 8.9% to -3.0%) from 1990 to 2019. By contrast, there was no significant change in global age-

43  
44 240 standardized incidence rates of SCI (-6.1% [-17.3% to 1.5%]) from 1990 to 2019. Regional

45  
46 241 and national TBI/SCI burden were described in the **supplementary materials**.

47  
48 242

## 243 **Leading Causes by Country and Territory**

244

245 Considering the cause-specific age-standardized incidence rates of TBI in 2019, falls was the  
246 leading cause in 74% (150/204) of countries/territories, followed by pedestrian road injuries  
247 (14%, 29/204), motor vehicle road injuries (5%, 11/204), and conflict and terrorism (2%,  
248 4/204) (**Figure 2; eTable 14**). The top three countries/territories with age-standardized  
249 incidence rates by falls were Finland (418 [324 to 539] cases per 100,000 population),  
250 Slovenia (401 [320 to 504] cases per 100,000 population), and Croatia (400 [318 to 501]  
251 cases per 100,000 population) (out of 150 countries/territories), by pedestrian road injuries  
252 were Mozambique (103 [76 to 134] cases per 100,000 population), Ghana (83 [61 to 109]  
253 cases per 100,000 population), and Guinea-Bissau (71 [50 to 95] cases per 100,000  
254 population) (out of 29 countries/territories), by motor vehicle road injuries were Comoros (86  
255 [61 to 117] cases per 100,000 population), Mauritania (79 [56 to 109] cases per 100,000  
256 population), and Cameroon (75 [52 to 103] cases per 100,000 population) (out of 11  
257 countries/territories), and by conflict and terrorism were Afghanistan (356 [134 to 798] cases  
258 per 100,000 population), Yemen (256 [103 to 590] cases per 100,000 population), and Syrian  
259 Arab Republic (180 [68 to 394] cases per 100,000 population) (out of 4 countries/territories)  
260 (**Figure 3**).

261

262 For SCI, falls was the leading cause for age-standardized incidence rates in 97% (198/204) of  
263 countries/territories in 2019, followed by conflict and terrorism (3%, 6/204) (**eTable 15**). The  
264 top three countries/territories with age-standardized incidence rates by falls were Greenland

1  
2  
3 265 (23 [15 to 34] cases per 100,000 population), Norway (21 [14 to 33] cases per 100,000  
4  
5 266 population), and Sweden (19 [12 to 29] cases per 100,000 population) (out of 198  
6  
7  
8 267 countries/territories), and by conflict and terrorism were Afghanistan (40 [8 to 128] cases per  
9  
10 268 100,000 population), Yemen (22 [5 to 66] cases per 100,000 population), and Syrian Arab  
11  
12  
13 269 Republic (21 [4 to 64] cases per 100,000 population) (out of 6 countries/territories).  
14  
15  
16 270 Percentage changes of cause-specific TBI/SCI burden were described in the **supplementary**  
17  
18 271 **materials**.

### 23 273 **Disease Burden by Socio-demographic Index**

24  
25  
26 274  
27  
28  
29 275 Generally, a positive association was found between age-standardized YLD rates of TBI and  
30  
31 276 SDI in 204 countries/territories in 2019 ( $\rho=0.42$ ,  $P<.001$ ) (**eFigure 7**). SCI on the other hand,  
32  
33  
34 277 had no statistical association with SDI ( $\rho=-0.05$ ,  $P=0.49$ ), although the SCI burden in a few  
35  
36 278 countries/territories, such as Afghanistan, far exceeded those of others.

### 41 280 **Discussion**

42  
43  
44 281  
45  
46  
47 282 This study provided the most up-to-date burden of TBI and SCI using GBD 2019 data. It also  
48  
49 283 presented the variations between the leading causes of TBI/SCI in 204 countries/territories.

50  
51  
52 284 Finally, it explored the associations between each national SDI and the burden of TBI/SCI.

### 54 285 55 56 57 286 **Incidence of TBI/SCI**

1  
2  
3 287  
4  
5 288 Globally, the age-standardized incidence rates of TBI significantly decreased since 1990. This  
6  
7  
8 289 improvement may reflect the benefits of global initiatives to reduce TBI rates. For example,  
9  
10 290 major efforts have focused on road safety and reduced road-related injuries, a leading cause of  
11  
12  
13 291 TBI globally [18]. In 2004, the United Nations General Assembly and the World Health  
14  
15  
16 292 Organization passed resolutions calling for preventive measures against road injuries [19].  
17  
18 293 The resolutions were championed in many countries/territories successively [19]. The age-  
19  
20  
21 294 standardized TBI incidence rates decreased significantly from 1990 to 2019 by -7.2% (-11.9%  
22  
23  
24 295 to -2.0%) in Oman, -20.3% (-22.5% to -17.9%) in Russia, and -9.8% (-13.6% to -5.4%) in  
25  
26 296 Sweden, demonstrating the effectiveness of their interventions.  
27  
28  
29 297

30  
31 298 Unfortunately, the global age-standardized SCI incidence rates did not significantly change  
32  
33  
34 299 despite the decreases in TBI. Although we used the same GBD 2019 data, this conclusion  
35  
36 300 differs from Ding *et al.*'s finding that the global age-standardized incidence rates of SCI  
37  
38  
39 301 decreased since 1990 [6]. Ding *et al.* calculated the temporal trends of the global age-  
40  
41  
42 302 standardized incidence rates of SCI using the Estimated Annual Percentage Change (EAPC)  
43  
44 303 [6]. The EAPC was based on a linear regression mode of the age-standardized rates and the  
45  
46  
47 304 calendar year [20]. However, EAPC can be biased in modeling injuries from natural disasters  
48  
49  
50 305 or wars; if included, it inflates estimates in volatile regions [21]. Furthermore, Ding *et al.*  
51  
52 306 misinterpreted their statistical results [6]. The EAPC was -0.08 but had a 95% confidence  
53  
54  
55 307 interval of -0.24 to 0.09 [6]. By focusing only on the point estimate of -0.08 and neglecting  
56  
57  
58 308 the confidence interval, they failed to convey that the confidence interval crossed zero. That  
59  
60



1  
2  
3 309 approach may confuse and bring biased information to policymakers [22]. Our study showed  
4  
5 310 a non-significant change in the global age-standardized incidence rates of SCI (-6.1% [-17.3%  
6  
7  
8 311 to 1.5%]). The lack of SCI change may be because motor vehicle accidents are a major cause  
9  
10 312 of TBI but not SCI. As discussed below, other interventions may be required to reduce SCI  
11  
12  
13 313 [23, 24].

14  
15  
16 314

### 17 18 315 **Causes of TBI/SCI**

19  
20  
21 316

22  
23 317 One challenge in any global effort to reduce falls is the aging population. The global  
24  
25 318 population over the age of 65 rose from 6.2% in 1990 to 9.1% in 2019 [25]. Falls are more  
26  
27  
28 319 common in older than younger adults owing to sarcopenia, osteoporosis, sleeping disturbance,  
29  
30  
31 320 multimorbidity, and frailty [13]. Several countries/territories with high age-standardized  
32  
33  
34 321 incidence rates of TBI/SCI by falls also have percentages of older adults that far exceeds the  
35  
36 322 world average of 9.1% of the population. Examples include Finland (22.1% of the population  
37  
38  
39 323 over the age of 65 in 2019), Slovenia (20.2%), Croatia (20.9%), Norway (17.3%), and  
40  
41  
42 324 Sweden (20.2%) [25]. Although some components of falls are modifiable, some  
43  
44 325 countries/territories have unique challenges due to their geographical features. Finland,  
45  
46  
47 326 Norway, and Sweden have cold climates and unique environmental risk factors (i.e., icy  
48  
49  
50 327 sidewalks) that may increase their populations' fall risk [26, 27]. Environmental risks may  
51  
52 328 need to be prioritized in these countries/territories, particularly as their populations age.

53  
54  
55 329  
56  
57  
58  
59  
60

1  
2  
3 330 This study also examined changes in age-standardized incidence rates by falls. Turkey had the  
4  
5 331 largest increases from 1990 to 2019 (TBI: 100.3% [88.8% to 114.5%], SCI: 110.5% [97.3%  
6  
7  
8 332 to 125.4%]). Armenia had a significant decrease in both TBI (-35.1% [-41.2% to -28.4%])  
9  
10 333 and SCI (-33.9% [-39.3% to -27.9%]). The reasons for this change were unknown but may be  
11  
12 334 related to changes in resource allocation. The gross domestic product (GDP, current USD) in  
13  
14 335 Armenia increased from \$2.26 billion in 1990 to \$13.86 billion in 2019, leading to increased  
15  
16 336 healthcare spending that may have improved public healthcare education [28-30]. By contrast,  
17  
18 337 Turkey faced economic difficulty in recent years; its GDP decreased from \$957.78 billion in  
19  
20 338 2013 to \$761 billion in 2019, which may have contributed to the significant increases in this  
21  
22 339 study [30].  
23  
24  
25  
26  
27  
28  
29  
30

31 341 Road injuries were the leading cause of TBI in 20% (40/204) of the countries/territories.  
32  
33 342 There was a higher prevalence in African countries/territories. One possible reason for the  
34  
35 343 high prevalence in Africa may be the rapid increase in motor vehicle ownership [31], without  
36  
37 344 sufficient road infrastructure (i.e., roads and traffic safety) [32-35]. A previous study found  
38  
39 345 non-adherence to traffic regulations, poorly maintained roads, inadequate traffic signage, and  
40  
41 346 a lack of pedestrian protections as possible reasons behind Mozambique's high age-  
42  
43 347 standardized incidence rates of TBI [36]. The lack of sufficient safety around motor vehicles  
44  
45 348 is not limited to Africa. The Dominican Republic also recorded high age-standardized TBI  
46  
47 349 incidence rates; this was also attributed to traffic safety, although the reported reasons were  
48  
49 350 high rates of people driving while intoxicated and limited policing of traffic violations [37].  
50  
51  
52 351 The high burden of TBI by road injuries in these countries/territories demonstrates that  
53  
54  
55  
56  
57  
58  
59  
60

1  
2  
3 352 despite some countries/territories having successfully reduced their road injuries, challenges  
4  
5 353 remain in others. Furthermore, the variations in causes and rates of TBI in this study suggest  
6  
7  
8 354 that global initiatives to reduce rates of motor vehicle accidents or TBI need to consider the  
9  
10 355 unique challenges faced by each country and territory rather than a generalist approach to rate  
11  
12  
13 356 reduction [19].  
14  
15

16 357  
17  
18 358 Finally, conflict and terrorism was the most common cause of TBI/SCI in 2% (4/204) and 3%  
19  
20 359 (6/204) of countries/territories, respectively, such as Afghanistan, Yemen, and Syrian Arab  
21  
22  
23 360 Republic, which are likely attributable to the on-going armed conflicts that have occurred in  
24  
25  
26 361 these countries/territories over many years [38-40].  
27  
28

29 362

### 31 363 **TBI/SCI Burden by Socio-demographic Index**

32  
33  
34 364  
35  
36 365 The burden of TBI was generally higher in countries/territories with higher SDI. One of the  
37  
38  
39 366 reasons for the difference may be disparities in access to healthcare resources [4]. Medical  
40  
41  
42 367 resources are sufficient and easily available in locations with higher SDI, so patients with TBI  
43  
44  
45 368 can be treated and recorded in time. However, medical resources are insufficient in locations  
46  
47 369 with lower SDI, and patients may die of treatable TBI and even fail to receive a diagnostic  
48  
49  
50 370 code. Furthermore, data from countries/territories with higher SDI may be more reliable than  
51  
52 371 locations with lower SDI, so estimates in locations with higher SDI may be closer to the true  
53  
54  
55 372 disease burden [5].  
56

57 373  
58  
59  
60

## 374 **Strengths and Limitations**

375

376 This study had some strengths. First, it provided the most up-to-date global, regional, and  
377 national burden of TBI/SCI from 1990 to 2019. The findings can help policymakers acquire  
378 the most up-to-date epidemiological characteristics of TBI/SCI in 21 GBD regions and 204  
379 countries/territories. Secondly, it presented variations of leading causes of TBI/SCI in 204  
380 different countries/territories even within a same geographical region. For example, the  
381 leading cause of TBI in the Sub-Saharan Africa region varied from falls in Angola to  
382 pedestrian road injuries in Namibia to motor vehicle road injuries in South Africa and conflict  
383 and terrorism in the Central African Republic. Falls were also the leading cause of SCI in  
384 most countries/territories in the North Africa and Middle East (e.g., Saudi Arabia, Egypt,  
385 Qatar); however, conflict and terrorism were the leading cause in Afghanistan, Iraq, Libya,  
386 Syrian Arab Republic, and Yemen. The presentation of variations in different  
387 countries/territories can provide richer information than a regional analysis and help  
388 policymakers identify which causes should be targeted to improve the effectiveness of  
389 preventive interventions.

390

391 This study also had some limitations. First, the data sources relied on patients having medical  
392 records, so reported estimates would underestimate the true incidence. For example, there was  
393 a discrepancy between the annual worldwide estimation of new TBI cases in this study (27.16  
394 million) and other recent expert sources (more than 50 million) [7]. The underestimation may  
395 be attributed to two reasons.

1  
2  
3 396  
4  
5 397 The first reason for underestimation is that the register-based data may not cover all cases. For  
6  
7  
8 398 example, the Nordic countries and the United States are considered to have reliable statistics,  
9  
10 399 but there are still patients treated at facilities that are not covered by registries (e.g., private  
11  
12  
13 400 healthcare) [7, 41]. Further, many patients with mild TBI go untreated and, therefore,  
14  
15  
16 401 unrecorded; population-based studies with a broad definition of TBI show significantly higher  
17  
18 402 TBI incidence rates than those based on hospital discharge rates [7]. The second reason for  
19  
20  
21 403 underestimation is that clinical diagnosis codes may not accurately match injuries, especially  
22  
23  
24 404 in patients with multi-trauma. For example, some patients may experience both TBI/SCI from  
25  
26 405 a traumatic event, but TBI would not be matched to the individual because SCI had a higher  
27  
28  
29 406 rank than TBI in the GBD severity hierarchy [5]. This is because after the GBD Traumatic  
30  
31 407 Brain Injury and Spinal Cord Injury Collaborators tried to apportion co-occurring non-fatal  
32  
33  
34 408 injuries using regression methods, they found that many long-term disabilities were assigned  
35  
36 409 to seemingly trivial non-fatal injury categories (e.g., open wounds/bruises), thus pulling  
37  
38  
39 410 disability away from more serious non-fatal injury outcomes (e.g., TBI/SCI) [4]. Therefore,  
40  
41  
42 411 this study followed the method that assigns one non-fatal injury case to the most severe of any  
43  
44 412 co-occurring non-fatal injuries according to the GBD severity hierarchy [4, 5]. This method  
45  
46  
47 413 was also utilized in the paper by the GBD Traumatic Brain Injury and Spinal Cord Injury  
48  
49  
50 414 Collaborators published in the Lancet Neurology [4].

51  
52 415  
53  
54 416 Second, this study might also underestimate the true prevalence. The GBD 2019 Study  
55  
56  
57 417 calculated the prevalence of non-fatal injuries through probabilities of permanent health loss  
58  
59  
60

1  
2  
3 418 [5]. Permanent health loss relates to the probability of patients (one year after the injury)  
4  
5 419 returning to a health status with more disability than their pre-injury health status [5].  
6  
7  
8 420 However, the probabilities of permanent health loss assessed in the GBD Study may be  
9  
10 421 grossly underestimated, especially for TBI, because accurate TBI prevalence data is even  
11  
12 422 more limited than incidence data, especially in low/middle-income countries; and TBI is not  
13  
14 423 an isolated event but can have variable long-term consequences, including dementia, stroke,  
15  
16 424 parkinsonism, and epilepsy [7]. For example, a large study from a Swedish registry found  
17  
18 425 higher probabilities of premature mortality, psychiatric inpatient admission/outpatient visits,  
19  
20 426 disability pension, welfare reciprocity, and low educational attainment after even a mild TBI  
21  
22 427 compared to uninjured siblings [42]. Furthermore, the associations between TBI and long-  
23  
24 428 term neurological diseases remain poorly understood; many sequelae other than those  
25  
26 429 mentioned above have not been considered, leading to an underestimation of the true TBI  
27  
28 430 prevalence [7].  
29  
30  
31  
32  
33  
34  
35  
36  
37  
38

39 431  
40 432 Third, a weakness of this study is the ability to estimate incidence in countries with lower-  
41  
42 433 quality data. Estimates in some data-sparse countries/territories were modeled and predicted  
43  
44 434 by borrowing estimates from data-rich countries/territories [5]. Therefore, the estimates of the  
45  
46 435 data-sparse countries/territories (e.g., Democratic People's Republic of Korea) might have a  
47  
48 436 greater deviation than the true incidence. Furthermore, the cause-specific burden (that is, the  
49  
50 437 leading cause) of TBI/SCI in some data-sparse countries/territories should be interpreted  
51  
52 438 carefully. For example, it is logically difficult to explain why falls have surpassed traffic  
53  
54 439 accidents as the leading cause of SCI in many population-rich Asian countries/territories (e.g.,  
55  
56  
57  
58  
59  
60

1  
2  
3 440 Malaysia) with chaotic traffic.  
4

5 441  
6  
7  
8 442 Fourth, the GBD 2019 Study did not link TBI/SCI with risk factors such as behavioral factors  
9  
10 443 (e.g., alcohol use), so we could not assess any associations between the two [43].  
11  
12  
13 444 Furthermore, while longitudinal cohort or survey analysis is commonly used to calculate  
14  
15 445 lifetime prevalence [44, 45], the GBD Study is a cross-sectional analysis conducted iteratively  
16  
17  
18 446 on an annual basis [5]. Short-term disability caused by non-fatal injuries is assumed to last  
19  
20  
21 447 less than one year in the GBD Study, which means that the short-term disability after TBI/SCI  
22  
23  
24 448 in a given year may not be calculated for prevalence in future iterations [5]. Therefore, we  
25  
26 449 could not calculate the lifetime prevalence of TBI/SCI through the GBD data.  
27  
28

29 450  
30  
31 451 Finally, the GBD Traumatic Brain Injury and Spinal Cord Injury Collaborators defined  
32  
33  
34 452 TBI/SCI by ICD-9/ICD-10 codes through physician review. However, with reference to the  
35  
36  
37 453 reviewer's comments, there may be a minor error probably not reflected in the results in the  
38  
39  
40 454 Lancet Neurology paper; the ICD-10 code S06.0 (concussion) can be considered a mild TBI,  
41  
42 455 but S06.1 (traumatic cerebral edema) in the published paper cannot [4].  
43  
44

45 456

### 47 457 **Implications for Future Studies**

48  
49 458  
50  
51  
52 459 First, population-based epidemiological studies may be improved in the future through  
53  
54  
55 460 standardized definitions (e.g., standardized criteria for diagnosis), methods (e.g., case  
56  
57  
58 461 ascertainment based on multiple, overlapping sources of information, such as hospitals,  
59  
60

1  
2  
3 462 outpatient clinics, general practitioners, and death certificates), and data presentation (e.g.,  
4  
5 463 collection of a complete calendar year of data) [7]. These improvements would be especially  
6  
7  
8 464 helpful in data-sparse locations to facilitate comparisons between countries/territories. Second,  
9  
10 465 there is a need for better ways to characterize the currently under-recognized risk of long-term  
11  
12  
13 466 disabling sequelae to bring estimates closer to the true prevalence, especially for mild TBI.  
14  
15  
16 467 Last, we hope that the GBD Collaborators will include the burden of TBI/SCI attributable to  
17  
18 468 risk factors; this would provide more detailed results on the causes of TBI/SCI and allow for  
19  
20  
21 469 more targeted preventative strategies. Furthermore, we hope that the GBD Collaborators  
22  
23  
24 470 include lifetime prevalence in future iterations to estimate the global impact of TBI/SCI  
25  
26 471 accurately.  
27  
28  
29 472

### 31 473 **Conclusions**

32  
33  
34 474  
35  
36 475 In conclusion, the global age-standardized incidence rates of TBI had a significant decrease  
37  
38  
39 476 since 1990, whereas SCI had no significant change. Falls was the leading cause of TBI/SCI in  
40  
41  
42 477 74% (150/204) and 97% (198/204) of countries/territories, respectively, but the variations of  
43  
44  
45 478 leading causes of TBI/SCI did exist between countries/territories, even within a same  
46  
47 479 geographic region. Although declining, high burden of TBI remained a concern in both higher  
48  
49  
50 480 and lower SDI countries/territories. High burden of SCI from falls in almost all  
51  
52 481 countries/territories demonstrates the need for falls reduction to be a global priority now and  
53  
54  
55 482 into the future, but priorities may vary between countries/territories.  
56  
57  
58 483  
59  
60



1  
2  
3 484 **Availability of Data and Materials**

4  
5 485

6  
7  
8 486 The raw data were available from the GBD Results Tool (<https://vizhub.healthdata.org/gbd->  
9  
10 487 [results/](https://vizhub.healthdata.org/gbd-)) and the supplementary materials.

11  
12  
13 488

14  
15  
16 489 **Competing Interests**

17  
18 490

19  
20  
21 491 The authors declare that they have no conflict of interest.

22  
23 492

24  
25  
26 493 **Funding**

27  
28 494

29  
30  
31 495 This study was funded by Taishan Scholars Program of Shandong Province-Young Taishan  
32  
33 496 Scholars (tsqn201909197).

34  
35 497

36  
37  
38  
39 498 **Authors' Contributions**

40  
41 499

42  
43  
44 500 H.Z., S.F., and L.C. contributed to the conception and design of the study. B.G. and D.B.A.  
45  
46 501 contributed to the acquisition, analysis, and interpretation of data. B.G. and D.B.A.  
47  
48 502 contributed to drafting the text or preparing the figures. All authors reviewed the manuscript.

49  
50  
51 503

52  
53  
54 504 **Acknowledgements**

55  
56 505

1  
2  
3 506 We thank the Institute for Health Metrics and Evaluation at the University of Washington and  
4  
5 507 all collaborators involved in the GBD 2019 study to make the data accessible to the public.  
6  
7

8 508

9  
10 509 **Ethical Approval**

11  
12  
13 510

14  
15 511 The data used in this study was publicly available and did not contain any independently  
16  
17 512 identifiable information. Therefore, no ethical approval or patient consent was required for  
18  
19  
20  
21 513 this study.  
22  
23  
24  
25  
26  
27  
28  
29  
30  
31  
32  
33  
34  
35  
36  
37  
38  
39  
40  
41  
42  
43  
44  
45  
46  
47  
48  
49  
50  
51  
52  
53  
54  
55  
56  
57  
58  
59  
60

## References

1. Maas AI, Stocchetti N, Bullock R Moderate and severe traumatic brain injury in adults. *Lancet Neurol* 2008; 7:728-741. [https://doi.org/10.1016/s1474-4422\(08\)70164-9](https://doi.org/10.1016/s1474-4422(08)70164-9)
2. Ahuja CS, Wilson JR, Nori S, Kotter MRN, Druschel C, Curt A, Fehlings MG Traumatic spinal cord injury. *Nat Rev Dis Primers* 2017; 3:17018. <https://doi.org/10.1038/nrdp.2017.18>
3. GBD 2016 Disease and Injury Incidence and Prevalence Collaborators. Global, regional, and national incidence, prevalence, and years lived with disability for 328 diseases and injuries for 195 countries, 1990-2016: a systematic analysis for the Global Burden of Disease Study 2016. *Lancet* 2017; 390:1211-1259. [https://doi.org/10.1016/s0140-6736\(17\)32154-2](https://doi.org/10.1016/s0140-6736(17)32154-2)
4. GBD 2016 Traumatic Brain Injury and Spinal Cord Injury Collaborators. Global, regional, and national burden of traumatic brain injury and spinal cord injury, 1990-2016: a systematic analysis for the Global Burden of Disease Study 2016. *Lancet Neurol* 2019; 18:56-87. [https://doi.org/10.1016/s1474-4422\(18\)30415-0](https://doi.org/10.1016/s1474-4422(18)30415-0)
5. GBD 2019 Diseases and Injuries Collaborators. Global burden of 369 diseases and injuries in 204 countries and territories, 1990-2019: a systematic analysis for the Global Burden of Disease Study 2019. *Lancet* 2020; 396:1204-1222. [https://doi.org/10.1016/s0140-6736\(20\)30925-9](https://doi.org/10.1016/s0140-6736(20)30925-9)
6. Ding W, Hu S, Wang P, Kang H, Peng R, Dong Y, Li F Spinal Cord Injury: The Global Incidence, Prevalence, and Disability from the Global Burden of Disease Study 2019. *Spine (Phila Pa 1976)* 2022; <https://doi.org/10.1097/brs.0000000000004417>
7. Maas AIR, Menon DK, Adelson PD, Andelic N, Bell MJ, Belli A, Bragge P, Brazinova A, Büki A, Chesnut RM, Citerio G, Coburn M, Cooper DJ, Crowder AT, Czeiter E, Czosnyka M, Diaz-Arrastia R, Dreier JP, Duhaime AC, Ercole A, van Essen TA, Feigin VL, Gao G, Giacino J, Gonzalez-Lara LE, Gruen RL, Gupta D, Hartings JA, Hill S, Jiang JY, Ketharanathan N, Kompanje EJO, Lanyon L, Laureys S, Lecky F, Levin H, Lingsma HF, Maegele M, Majdan M, Manley G, Marsteller J, Mascia L, McFadyen C, Mondello S, Newcombe V, Palotie A, Parizel PM, Peul W, Piercy J, Polinder S, Puybasset L, Rasmussen TE, Rossaint R, Smielewski P, Söderberg J, Stanworth SJ, Stein MB, von Steinbüchel N, Stewart W, Steyerberg EW, Stocchetti N, Synnot A, Te Ao B, Tenovuo O, Theadom A, Tibboel D, Videtta W, Wang KKW, Williams WH, Wilson L, Yaffe K Traumatic brain injury: integrated approaches to improve prevention, clinical care, and research. *Lancet Neurol* 2017; 16:987-1048. [https://doi.org/10.1016/s1474-4422\(17\)30371-x](https://doi.org/10.1016/s1474-4422(17)30371-x)
8. Stevens GA, Alkema L, Black RE, Boerma JT, Collins GS, Ezzati M, Grove JT, Hogan DR, Hogan MC, Horton R, Lawn JE, Marušić A, Mathers CD, Murray CJ, Rudan I, Salomon JA, Simpson PJ, Vos T, Welch V Guidelines for Accurate and Transparent Health Estimates Reporting: the GATHER statement. *Lancet* 2016; 388:e19-e23. [https://doi.org/10.1016/s0140-6736\(16\)30388-9](https://doi.org/10.1016/s0140-6736(16)30388-9)
9. von Elm E, Altman DG, Egger M, Pocock SJ, Gøtzsche PC, Vandenbroucke JP The Strengthening the Reporting of Observational Studies in Epidemiology (STROBE) statement: guidelines for reporting observational studies. *Lancet* 2007; 370:1453-

- 1  
2 559 1457. [https://doi.org/10.1016/s0140-6736\(07\)61602-x](https://doi.org/10.1016/s0140-6736(07)61602-x)  
3  
4 560 10. GBD 2019 Universal Health Coverage Collaborators. Measuring universal health  
5 561 coverage based on an index of effective coverage of health services in 204 countries  
6 562 and territories, 1990-2019: a systematic analysis for the Global Burden of Disease  
7 563 Study 2019. *Lancet* 2020; 396:1250-1284. [https://doi.org/10.1016/s0140-6736\(20\)30750-9](https://doi.org/10.1016/s0140-6736(20)30750-9)  
8 564  
9  
10 565 11. Salomon JA, Haagsma JA, Davis A, de Noordhout CM, Polinder S, Havelaar AH,  
11 566 Cassini A, Devleeschauwer B, Kretzschmar M, Speybroeck N, Murray CJ, Vos T  
12 567 Disability weights for the Global Burden of Disease 2013 study. *Lancet Glob Health*  
13 568 2015; 3:e712-723. [https://doi.org/10.1016/s2214-109x\(15\)00069-8](https://doi.org/10.1016/s2214-109x(15)00069-8)  
14 569  
15 569 12. GBD 2019 Demographics Collaborators. Global age-sex-specific fertility, mortality,  
16 570 healthy life expectancy (HALE), and population estimates in 204 countries and  
17 571 territories, 1950-2019: a comprehensive demographic analysis for the Global Burden  
18 572 of Disease Study 2019. *Lancet* 2020; 396:1160-1203. [https://doi.org/10.1016/s0140-6736\(20\)30977-6](https://doi.org/10.1016/s0140-6736(20)30977-6)  
19 573  
20 574 13. Ye P, Er Y, Wang H, Fang L, Li B, Ivers R, Keay L, Duan L, Tian M Burden of falls  
21 575 among people aged 60 years and older in mainland China, 1990-2019: findings from  
22 576 the Global Burden of Disease Study 2019. *Lancet Public Health* 2021; 6:e907-e918.  
23 577 [https://doi.org/10.1016/s2468-2667\(21\)00231-0](https://doi.org/10.1016/s2468-2667(21)00231-0)  
24 578  
25 578 14. GBD 2019 Fracture Collaborators. Global, regional, and national burden of bone  
26 579 fractures in 204 countries and territories, 1990-2019: a systematic analysis from the  
27 580 Global Burden of Disease Study 2019. *Lancet Healthy Longev* 2021; 2:e580-e592.  
28 581 [https://doi.org/10.1016/s2666-7568\(21\)00172-0](https://doi.org/10.1016/s2666-7568(21)00172-0)  
29 582  
30 582 15. Srivastav A, Richard CL, McRell AS, Stropolis M The Unintended Consequence of  
31 583 Novel Coronavirus (COVID-19) Pandemic on Racial Inequities Associated With  
32 584 Adverse Childhood Experiences (ACEs): Findings From a Population-Based Study.  
33 585 *Front Public Health* 2021; 9:701887. <https://doi.org/10.3389/fpubh.2021.701887>  
34 586  
35 586 16. GBD 2016 Stroke Collaborators. Global, regional, and national burden of stroke,  
36 587 1990-2016: a systematic analysis for the Global Burden of Disease Study 2016.  
37 588 *Lancet Neurol* 2019; 18:439-458. [https://doi.org/10.1016/s1474-4422\(19\)30034-1](https://doi.org/10.1016/s1474-4422(19)30034-1)  
38 589  
39 589 17. Jin X, Ren J, Li R, Gao Y, Zhang H, Li J, Zhang J, Wang X, Wang G Global burden  
40 590 of upper respiratory infections in 204 countries and territories, from 1990 to 2019.  
41 591 *EClinicalMedicine* 2021; 37:100986. <https://doi.org/10.1016/j.eclinm.2021.100986>  
42 592  
43 592 18. World Health Organization. Road traffic injuries. Available at:  
44 593 <https://www.who.int/news-room/fact-sheets/detail/road-traffic-injuries>.  
45 594  
46 594 19. Hyder AA, Hoe C, Hajar M, Peden M The political and social contexts of global road  
47 595 safety: challenges for the next decade. *Lancet* 2022; 400:127-136.  
48 596 [https://doi.org/10.1016/s0140-6736\(22\)00917-5](https://doi.org/10.1016/s0140-6736(22)00917-5)  
49 597  
50 597 20. Liu Z, Jiang Y, Yuan H, Fang Q, Cai N, Suo C, Jin L, Zhang T, Chen X The trends in  
51 598 incidence of primary liver cancer caused by specific etiologies: Results from the  
52 599 Global Burden of Disease Study 2016 and implications for liver cancer prevention. *J*  
53 600 *Hepatol* 2019; 70:674-683. <https://doi.org/10.1016/j.jhep.2018.12.001>  
54 601  
55 601 21. Mohammadi E, Villeneuve LM, Smith ZA Letter to the Editor: "Spinal Cord Injury  
56 602 The Global Incidence, Prevalence, and Disability From the Global Burden of Disease  
57 603 Study 2019". *Spine* (Phila Pa 1976)

- 2023;<https://doi.org/10.1097/brs.0000000000004726>
- 604  
605 22. Greenland S, Senn SJ, Rothman KJ, Carlin JB, Poole C, Goodman SN, Altman DG  
606 Statistical tests, P values, confidence intervals, and power: a guide to  
607 misinterpretations. *Eur J Epidemiol* 2016; 31:337-350. [https://doi.org/10.1007/s10654-](https://doi.org/10.1007/s10654-016-0149-3)  
608 [016-0149-3](https://doi.org/10.1007/s10654-016-0149-3)
- 609 23. World Health Organization. Falls. Available at: [https://www.who.int/news-room/fact-](https://www.who.int/news-room/fact-sheets/detail/falls)  
610 [sheets/detail/falls](https://www.who.int/news-room/fact-sheets/detail/falls).
- 611 24. World Health Organization. Spinal cord injury. Available at:  
612 <https://www.who.int/news-room/fact-sheets/detail/spinal-cord-injury>.
- 613 25. The World Bank. Population (age group as % of total population). Available at:  
614 <https://genderdata.worldbank.org/indicators/sp-pop-zs/?age=65%2B&view=trend>.
- 615 26. Ala-Seppälä H, Heino I, Frantzen J, Takala RS, Katila AJ, Kyllönen A, Maanpää HR,  
616 Posti JP, Tallus J, Tenovuo O Injury profiles, demography and representativeness of  
617 patients with TBI attending a regional emergency department. *Brain Inj* 2016;  
618 30:1062-1067. <https://doi.org/10.3109/02699052.2016.1170880>
- 619 27. WorldAtlas. Nordic Countries. Available at:  
620 <https://www.worldatlas.com/articles/nordic-countries.html>.
- 621 28. Chekijian S, Truzyan N, Stepanyan T, Bazarchyan A Healthcare in transition in the  
622 Republic of Armenia: the evolution of emergency medical systems and directions  
623 forward. *Int J Emerg Med* 2021; 14:5. <https://doi.org/10.1186/s12245-020-00328-3>
- 624 29. Peek-Asa C, Coman MA, Zorn A, Chikhladze N, Cebanu S, Tadevosyan A, Hamann  
625 CJ Association of traumatic brain injury severity and time to definitive care in three  
626 low-middle-income European countries. *Inj Prev* 2022; 28:54-60.  
627 <https://doi.org/10.1136/injuryprev-2020-044049>
- 628 30. The World Bank. GDP (current US\$). Available at:  
629 <https://data.worldbank.org/indicator/NY.GDP.MKTP.CD?page=1>.
- 630 31. Frances IU, Maxwell UN, Harold CM, Donald CO, Uloma J Determinants of Vehicle  
631 Ownership in Nigeria. *SAGE Open* 2020;  
632 10<https://doi.org/10.1177/2158244020922970>
- 633 32. Embolo FN, Bellamkonda N, Dickson D, Motwani G, Mbeboh SN, Mbiarikai M,  
634 Oben E, Oke R, Dicker RA, Juillard C, Christie SA, Chichom-Mefire A Epidemiology  
635 of traumatic brain injury based on clinical symptoms amongst inhabitants of the  
636 Southwest Region of Cameroon: a community-based study. *Brain Inj* 2021; 35:1184-  
637 1191. <https://doi.org/10.1080/02699052.2021.1957150>
- 638 33. Takoukam R, Kanmounye US, Robertson FC, Zimmerman K, Nguemba S, Lartigue  
639 JW, Park KB, Figuim B, Esene I Prehospital Conditions and Outcomes After  
640 Craniotomy for Traumatic Brain Injury Performed Within 72 Hours in Central  
641 Cameroon: A Cross-Sectional Study. *World Neurosurg* 2020; 142:e238-e244.  
642 <https://doi.org/10.1016/j.wneu.2020.06.182>
- 643 34. Laeke T, Tirsit A, Kassahun A, Sahlu A, Debebe T, Yesehak B, Masresha S, Deyassa  
644 N, Moen BE, Lund-Johansen M, Sundström T Prospective Study of Surgery for  
645 Traumatic Brain Injury in Addis Ababa, Ethiopia: Trauma Causes, Injury Types, and  
646 Clinical Presentation. *World Neurosurg* 2021; 149:e460-e468.  
647 <https://doi.org/10.1016/j.wneu.2021.02.003>
- 648 35. Ackah M, Gazali Salifu M, Osei Yeboah C Estimated incidence and case fatality rate

- 1  
2 649 of traumatic brain injury among children (0-18 years) in Sub-Saharan Africa. A  
3 650 systematic review and meta-analysis. PLoS One 2021; 16:e0261831.  
4 651 <https://doi.org/10.1371/journal.pone.0261831>  
5  
6 652 36. Nizamo H, Meyrowitsch DW, Zacarias E, Konradsen F Mortality due to injuries in  
7 653 Maputo City, Mozambique. Int J Inj Contr Saf Promot 2006; 13:1-6.  
8 654 <https://doi.org/10.1080/17457300500151705>  
9  
10 655 37. Reddy SP, Walsh MS, Paulino-Ramirez R, Florenzán J, Fernández J, Nwariaku FE,  
11 656 Abdelnaby A Neurologic injuries following road traffic accidents in the Dominican  
12 657 Republic: Examining causes and potential solutions. Traffic Inj Prev 2019; 20:690-  
13 658 695. <https://doi.org/10.1080/15389588.2019.1643016>  
14  
15 659 38. The L Afghanistan: the international community must act. Lancet 2021; 398:1851.  
16 660 [https://doi.org/10.1016/s0140-6736\(21\)02535-6](https://doi.org/10.1016/s0140-6736(21)02535-6)  
17  
18 661 39. The United Nations. UN News Global perspective Human stories. Available at:  
19 662 <https://news.un.org/en/story/2021/09/1101162>.  
20  
21 663 40. International Committee of The Red Cross. War in Yemen. Available at:  
22 664 <https://www.icrc.org/en/war-yemen>.  
23  
24 665 41. Cota MR, Moses AD, Jikaria NR, Bittner KC, Diaz-Arrastia RR, Latour LL, Turtzo  
25 666 LC Discordance between Documented Criteria and Documented Diagnosis of  
26 667 Traumatic Brain Injury in the Emergency Department. J Neurotrauma 2019; 36:1335-  
27 668 1342. <https://doi.org/10.1089/neu.2018.5772>  
28  
29 669 42. Sariaslan A, Sharp DJ, D'Onofrio BM, Larsson H, Fazel S Long-Term Outcomes  
30 670 Associated with Traumatic Brain Injury in Childhood and Adolescence: A Nationwide  
31 671 Swedish Cohort Study of a Wide Range of Medical and Social Outcomes. PLoS Med  
32 672 2016; 13:e1002103. <https://doi.org/10.1371/journal.pmed.1002103>  
33  
34 673 43. GBD 2019 Risk Factors Collaborators. Global burden of 87 risk factors in 204  
35 674 countries and territories, 1990-2019: a systematic analysis for the Global Burden of  
36 675 Disease Study 2019. Lancet 2020; 396:1223-1249. [https://doi.org/10.1016/s0140-6736\(20\)30752-2](https://doi.org/10.1016/s0140-6736(20)30752-2)  
37  
38 676  
39 677 44. McKinlay A, Grace RC, Horwood LJ, Fergusson DM, Ridder EM, MacFarlane MR  
40 678 Prevalence of traumatic brain injury among children, adolescents and young adults:  
41 679 prospective evidence from a birth cohort. Brain Inj 2008; 22:175-181.  
42 680 <https://doi.org/10.1080/02699050801888824>  
43  
44 681 45. Whiteneck GG, Cuthbert JP, Corrigan JD, Bogner JA Prevalence of Self-Reported  
45 682 Lifetime History of Traumatic Brain Injury and Associated Disability: A Statewide  
46 683 Population-Based Survey. J Head Trauma Rehabil 2016; 31:E55-62.  
47 684 <https://doi.org/10.1097/htr.0000000000000140>  
48  
49 685  
50 686

1  
2 687 **Figure Legends**

3 688  
4  
5 689 **Figure 1**

6 690  
7 691 Age-standardized incidence rates per 100,000 persons of traumatic brain injury (A) and spinal  
8 692 cord injury (B) by countries/territories, 2019

9 693  
10  
11 694 **Figure 2**

12 695  
13  
14 696 The leading causes for age-standardized incidence rates of traumatic brain injury (A) and  
15 697 spinal cord injury (B) by countries/territories, 2019

16 698  
17  
18 699 **Figure 3**

19 700  
20 701 Number of countries/territories by the leading causes for age-standardized incidence rates of  
21 702 traumatic brain injury (TBI) (A) and spinal cord injury (SCI) (B);  
22 703  
23 704 total countries/territories=204; the listed are the top three countries/territories with age-  
24 705 standardized incidence rates caused by each cause, 2019; and the top three with both the  
25 706 largest increase and the largest decrease, 1990–2019

28  
29  
30  
31  
32  
33  
34  
35  
36  
37  
38  
39  
40  
41  
42  
43  
44  
45  
46  
47  
48  
49  
50  
51  
52  
53  
54  
55  
56  
57  
58  
59  
60

1

Table 1. Incidence of traumatic brain injury in 1990 and 2019, and percentage changes of age-standardized rates by location, 1990–2019

| Location                     | Incidence                       |                                 |                                                |                  |                                                         |
|------------------------------|---------------------------------|---------------------------------|------------------------------------------------|------------------|---------------------------------------------------------|
|                              | Numbers<br>(95% UI)             |                                 | Age-standardized rates per 100,000<br>(95% UI) |                  | Percentage change of age-standardized rates<br>(95% UI) |
|                              | (Year 1990)                     | (Year 2019)                     | (Year 1990)                                    | (Year 2019)      | (Year 1990–Year 2019)                                   |
| Global                       | 18853869 (16215389 to 21806108) | 27160708 (23357251 to 31415052) | 366 (317 to 421)                               | 346 (298 to 401) | -5.5% (-8.9% to -3.0%)                                  |
| High-income North America    | 1120251 (915712 to 1386641)     | 1343020 (1130550 to 1633382)    | 392 (318 to 491)                               | 339 (280 to 416) | -13.7% (-17.1% to -10.0%)                               |
| Australasia                  | 143293 (121566 to 172676)       | 227584 (194914 to 270506)       | 710 (596 to 863)                               | 729 (613 to 889) | 2.6% (-0.9% to 6.0%)                                    |
| High-income Asia Pacific     | 682610 (576222 to 818678)       | 684210 (585181 to 807782)       | 386 (326 to 468)                               | 337 (282 to 414) | -12.8% (-15.8% to -9.6%)                                |
| Western Europe               | 1900129 (1658576 to 2211597)    | 2211884 (1887690 to 2613432)    | 459 (398 to 536)                               | 413 (352 to 494) | -10.0% (-13.2% to -6.4%)                                |
| Southern Latin America       | 202139 (174596 to 238831)       | 282368 (245426 to 331894)       | 409 (354 to 481)                               | 420 (363 to 497) | 2.9% (0.0% to 5.8%)                                     |
| Eastern Europe               | 2111822 (1829230 to 2431948)    | 1596337 (1380438 to 1851604)    | 913 (788 to 1057)                              | 737 (633 to 857) | -19.3% (-20.9% to -17.5%)                               |
| Central Europe               | 1050449 (918891 to 1208699)     | 860390 (750474 to 986981)       | 846 (738 to 979)                               | 729 (631 to 857) | -13.8% (-16.4% to -11.0%)                               |
| Central Asia                 | 286651 (249571 to 332136)       | 354124 (307249 to 410664)       | 410 (358 to 472)                               | 374 (325 to 433) | -8.7% (-11.1% to -6.5%)                                 |
| Central Latin America        | 614132 (514302 to 738706)       | 765677 (649993 to 907182)       | 369 (315 to 437)                               | 306 (260 to 363) | -17.2% (-21.4% to -14.1%)                               |
| Andean Latin America         | 103322 (87106 to 127542)        | 154311 (135039 to 178003)       | 268 (229 to 325)                               | 243 (213 to 279) | -9.5% (-23.6% to 0.1%)                                  |
| Caribbean                    | 104915 (91947 to 119513)        | 155545 (137052 to 177959)       | 299 (263 to 338)                               | 325 (286 to 373) | 8.5% (4.6% to 12.2%)                                    |
| Tropical Latin America       | 402255 (323726 to 499391)       | 525871 (427539 to 647705)       | 261 (213 to 323)                               | 231 (187 to 286) | -11.5% (-14.6% to -8.6%)                                |
| East Asia                    | 1777529 (1457606 to 2180900)    | 3412591 (2824709 to 4137435)    | 146 (120 to 178)                               | 207 (170 to 253) | 41.5% (34.7% to 48.6%)                                  |
| Southeast Asia               | 1221270 (1035226 to 1428941)    | 1653210 (1430159 to 1907523)    | 270 (232 to 312)                               | 246 (213 to 284) | -8.8% (-13.7% to -5.1%)                                 |
| Oceania                      | 12373 (10780 to 14206)          | 29408 (25561 to 33939)          | 213 (186 to 242)                               | 244 (214 to 280) | 14.8% (11.1% to 18.8%)                                  |
| North Africa and Middle East | 1282547 (1094820 to 1500156)    | 1911495 (1624871 to 2305162)    | 373 (320 to 432)                               | 319 (272 to 382) | -14.5% (-24.8% to -4.0%)                                |
| South Asia                   | 4300736 (3694519 to 4984977)    | 8775756 (7523034 to 10153936)   | 450 (388 to 515)                               | 508 (438 to 587) | 13.1% (9.7% to 16.1%)                                   |
| Southern Sub-Saharan Africa  | 115447 (93813 to 140794)        | 147127 (120571 to 177386)       | 233 (192 to 280)                               | 190 (157 to 230) | -18.4% (-21.4% to -15.8%)                               |
| Western Sub-Saharan Africa   | 382027 (311502 to 464214)       | 911247 (745370 to 1110360)      | 224 (187 to 269)                               | 233 (194 to 277) | 3.6% (-0.4% to 6.6%)                                    |
| Eastern Sub-Saharan Africa   | 915689 (614243 to 1558449)      | 904591 (757646 to 1080346)      | 491 (344 to 789)                               | 246 (209 to 286) | -49.8% (-67.5% to -30.4%)                               |
| Central Sub-Saharan Africa   | 124283 (103595 to 154993)       | 253964 (218605 to 293993)       | 244 (207 to 294)                               | 217 (189 to 246) | -11.3% (-19.9% to -5.1%)                                |

Abbreviations: UI, uncertainty interval

34

35

36

37

38

39

40

41

42

43

44

45

46



1

Table 2. Incidence of spinal cord injury in 1990 and 2019, and percentage changes of age-standardized rates by location, 1990–2019

|                                     | Incidence                 |                            |                                                |               |                                                         |
|-------------------------------------|---------------------------|----------------------------|------------------------------------------------|---------------|---------------------------------------------------------|
|                                     | Numbers<br>(95% UI)       |                            | Age-standardized rates per 100,000<br>(95% UI) |               | Percentage change of age-standardized rates<br>(95% UI) |
|                                     | (Year 1990)               | (Year 2019)                | (Year 1990)                                    | (Year 2019)   | (Year 1990–Year 2019)                                   |
| <b>Global</b>                       | 595228 (471497 to 766656) | 909001 (706953 to 1156410) | 12 (10 to 16)                                  | 12 (9 to 15)  | -6.1% (-17.3% to 1.5%)                                  |
| <b>High-income North America</b>    | 67501 (52610 to 87116)    | 114001 (85370 to 155645)   | 22 (17 to 28)                                  | 23 (17 to 30) | 4.6% (-0.9% to 10.5%)                                   |
| <b>Australasia</b>                  | 2714 (2200 to 3280)       | 4996 (3949 to 6243)        | 13 (11 to 16)                                  | 14 (11 to 17) | 8.1% (3.3% to 13.2%)                                    |
| <b>High-income Asia Pacific</b>     | 24139 (19331 to 29846)    | 32690 (25123 to 43125)     | 13 (11 to 16)                                  | 12 (9 to 15)  | -9.8% (-13.9% to -6.4%)                                 |
| <b>Western Europe</b>               | 46448 (36453 to 59098)    | 61215 (45912 to 80682)     | 10 (8 to 13)                                   | 10 (8 to 12)  | -5.6% (-9.8% to -2.2%)                                  |
| <b>Southern Latin America</b>       | 3665 (3016 to 4385)       | 5305 (4326 to 6394)        | 8 (6 to 9)                                     | 8 (6 to 9)    | 1.7% (-2.6% to 5.2%)                                    |
| <b>Eastern Europe</b>               | 36775 (29156 to 46344)    | 30092 (23743 to 37989)     | 16 (12 to 20)                                  | 13 (11 to 16) | -15.7% (-18.3% to -12.9%)                               |
| <b>Central Europe</b>               | 19087 (15495 to 23162)    | 17227 (13648 to 21504)     | 15 (12 to 18)                                  | 13 (11 to 16) | -13.0% (-16.2% to -9.8%)                                |
| <b>Central Asia</b>                 | 4887 (4059 to 5797)       | 6252 (5146 to 7468)        | 7 (6 to 9)                                     | 7 (6 to 8)    | -6.8% (-9.5% to -4.3%)                                  |
| <b>Central Latin America</b>        | 19015 (14979 to 24183)    | 24749 (19700 to 30982)     | 13 (10 to 17)                                  | 10 (8 to 13)  | -23.4% (-34.3% to -17.9%)                               |
| <b>Andean Latin America</b>         | 2898 (1837 to 5488)       | 2871 (2381 to 3389)        | 8 (5 to 14)                                    | 5 (4 to 5)    | -39.5% (-66.5% to -11.2%)                               |
| <b>Caribbean</b>                    | 2137 (1747 to 2618)       | 3459 (2814 to 4227)        | 7 (5 to 8)                                     | 7 (6 to 9)    | 8.2% (0.9% to 15.1%)                                    |
| <b>Tropical Latin America</b>       | 21365 (16580 to 27710)    | 33477 (25278 to 44097)     | 16 (12 to 20)                                  | 14 (11 to 19) | -8.1% (-11.5% to -5.1%)                                 |
| <b>East Asia</b>                    | 104274 (79266 to 134082)  | 236241 (173443 to 315144)  | 10 (7 to 13)                                   | 13 (10 to 18) | 39.8% (32.0% to 48.0%)                                  |
| <b>Southeast Asia</b>               | 36808 (28373 to 48545)    | 47473 (37736 to 59770)     | 9 (7 to 12)                                    | 7 (6 to 9)    | -18.7% (-31.8% to -10.7%)                               |
| <b>Oceania</b>                      | 253 (203 to 313)          | 569 (466 to 697)           | 5 (4 to 6)                                     | 5 (4 to 6)    | 10.3% (-2.6% to 19.0%)                                  |
| <b>North Africa and Middle East</b> | 42700 (28665 to 64843)    | 52776 (34780 to 97680)     | 14 (9 to 21)                                   | 9 (6 to 17)   | -32.7% (-60.7% to 8.9%)                                 |
| <b>South Asia</b>                   | 81527 (64240 to 103563)   | 156382 (120425 to 201426)  | 9 (7 to 11)                                    | 9 (7 to 12)   | 5.1% (-7.8% to 12.8%)                                   |
| <b>Southern Sub-Saharan Africa</b>  | 4607 (3525 to 6118)       | 6590 (5072 to 8666)        | 10 (8 to 14)                                   | 9 (7 to 12)   | -12.0% (-16.5% to -8.4%)                                |
| <b>Western Sub-Saharan Africa</b>   | 16168 (11877 to 22347)    | 38162 (28265 to 51944)     | 11 (8 to 15)                                   | 11 (8 to 15)  | 3.4% (-5.4% to 8.0%)                                    |
| <b>Eastern Sub-Saharan Africa</b>   | 54804 (22784 to 133741)   | 29156 (22453 to 37652)     | 30 (14 to 69)                                  | 9 (7 to 12)   | -69.8% (-86.8% to -36.8%)                               |
| <b>Central Sub-Saharan Africa</b>   | 3457 (2080 to 6799)       | 5318 (3976 to 7773)        | 7 (4 to 12)                                    | 5 (4 to 6)    | -29.1% (-48% to -10.3%)                                 |

Abbreviations: UI, uncertainty interval

35

36

37

38

39

40

41

42

43

44

45

46

1  
2  
3  
4  
5  
6  
7  
8  
9  
10  
11  
12  
13  
14  
15  
16  
17  
18  
19  
20  
21  
22  
23  
24  
25  
26  
27  
28  
29  
30  
31  
32  
33  
34  
35  
36  
37  
38  
39  
40  
41  
42  
43  
44  
45  
46  
47  
48  
49  
50  
51  
52  
53  
54  
55  
56  
57  
58  
59  
60

**A**



**B**

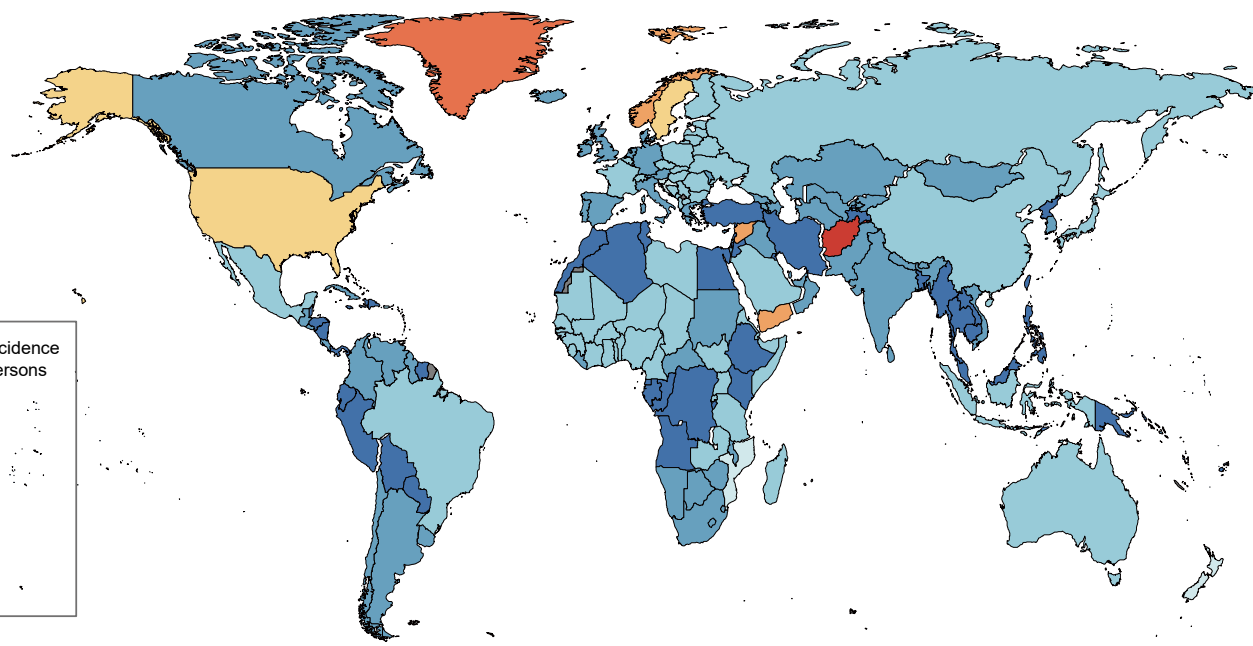

1  
2  
3  
4  
5  
6  
7  
8  
9  
10  
11  
12  
13  
14  
15  
16  
17  
18  
19  
20  
21  
22  
23  
24  
25  
26  
27  
28  
29  
30  
31  
32  
33  
34  
35  
36  
37  
38  
39  
40  
41  
42  
43  
44  
45  
46  
47  
48  
49  
50  
51  
52  
53  
54  
55  
56  
57  
58  
59  
60

**A**

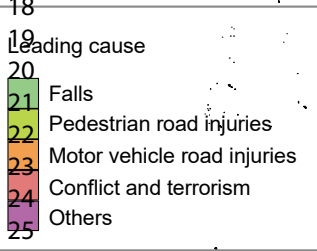

**B**

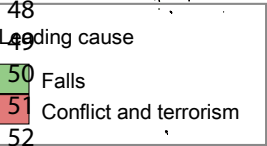

**A**

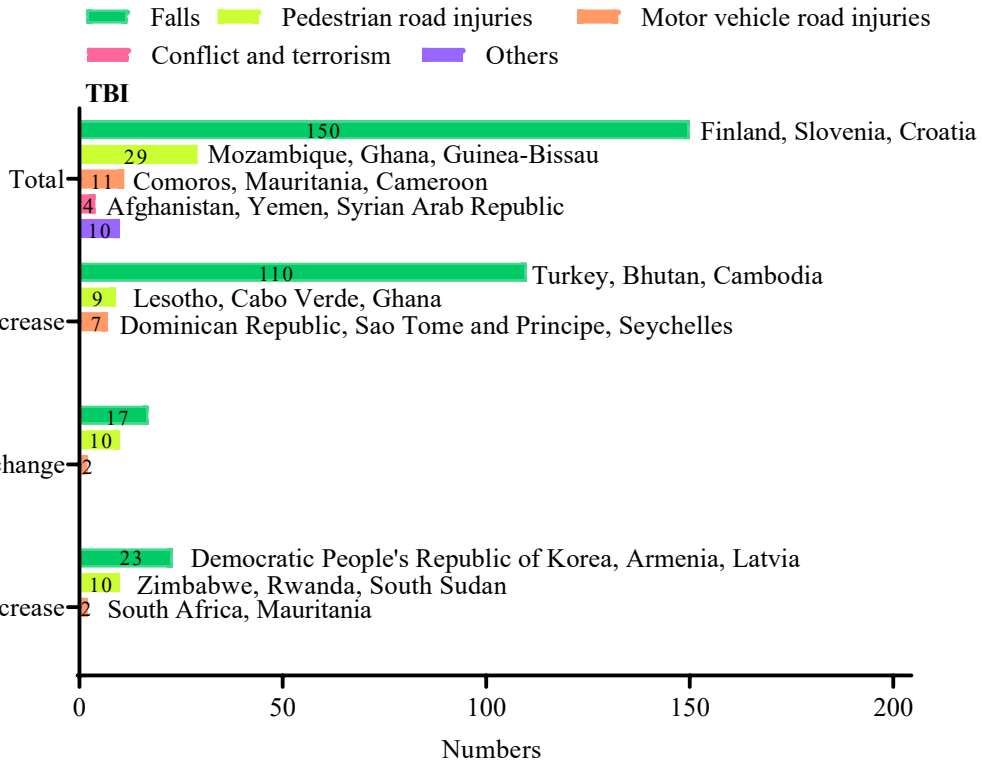

**B**

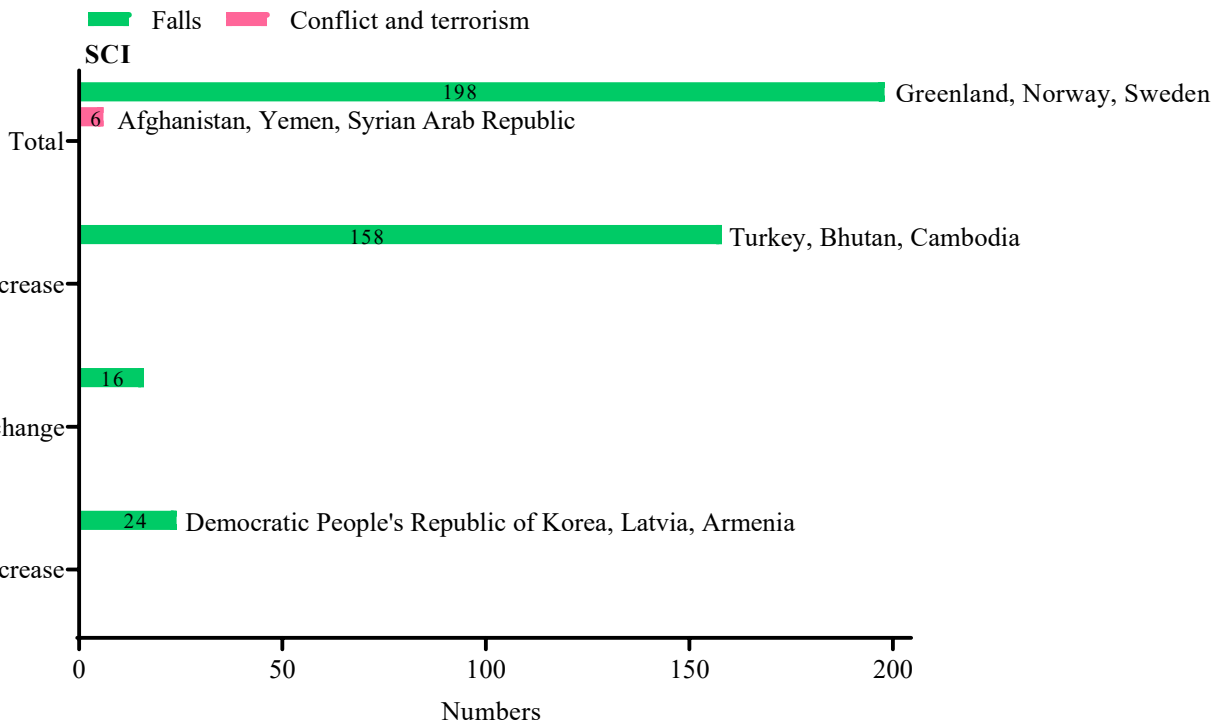

## Supplementary materials

### Global, Regional, and National Disease Burden

#### Leading Causes by Country and Territory

eFigure 1. Incidence of traumatic brain injury worldwide

eFigure 2. Prevalence of traumatic brain injury worldwide

eFigure 3. Years lived with disability of traumatic brain injury worldwide

eFigure 4. Incidence of spinal cord injury worldwide

eFigure 5. Prevalence of spinal cord injury worldwide

eFigure 6. Years lived with disability of spinal cord injury worldwide

eFigure 7. Associations between Socio-demographic Index (SDI) and age-standardized years lived with disability (YLDs) rates of traumatic brain injury and spinal cord injury in 204 countries and territories

eTable 1. Global Burden of Disease detailed data sources for estimates of non-fatal injuries burden from 204 countries and territories

eTable 2. Global Burden of Disease severity hierarchy for nature-of-injury

eTable 3. Global Burden of Disease lay descriptions and disability weights for health states

eTable 4. Global Burden of Disease (GBD) location hierarchy: 7 GBD super regions, 21 GBD regions, and 204 countries and territories

eTable 5. Global Burden of Disease world population standard

eTable 6. Global Burden of Disease (GBD) cause hierarchy with levels for injuries

eTable 7. Global Burden of Disease locational ISO3 code and Socio-demographic Index (SDI), 2019

eTable 8. Incidence of traumatic brain injury in 1990 and 2019, and percentage changes of age-standardized rates by location, 1990–2019

eTable 9. Prevalence of traumatic brain injury in 1990 and 2019, and percentage changes of age-standardized estimates by location, 1990–2019

eTable 10. Years lived with disability for 1990 and 2019 and percentage changes of age-standardized rates by location for traumatic brain injury, 1990–2019

eTable 11. Incidence of spinal cord injury in 1990 and 2019, and percentage changes of age-standardized rates by location, 1990–2019

eTable 12. Prevalence of spinal cord injury in 1990 and 2019, and percentage changes of age-standardized estimates by location, 1990–2019

eTable 13. Years lived with disability for 1990 and 2019 and percentage changes of age-standardized rates by location for spinal cord injury, 1990–2019

eTable 14. Incidence for 1990 and 2019 and percentage changes of age-standardized rates by location and cause for traumatic brain injury, 1990–2019

eTable 15. Incidence for 1990 and 2019 and percentage changes of age-standardized rates by location and cause for spinal cord injury, 1990–2019

### Global, Regional, and National Disease Burden

Regionally, Eastern Europe had the largest age-standardized incidence rates (737 [633 to 857] cases per 100,000 population), age-standardized prevalence estimates (1312 [1240 to 1393] cases per 100,000 population), and age-standardized YLD rates (193 [136 to 261] YLDs per 100,000 population) of TBI in 2019. High-income North America had the largest age-standardized incidence rates (23 [17 to 30] cases per 100,000 population), age-standardized prevalence estimates (438 [404 to 474] cases per 100,000 population), and age-standardized YLD rates (113 [80 to 146] YLDs per 100,000 population) of SCI in 2019.

Nationally, for TBI, Slovenia had the largest age-standardized incidence rates (885 [768 to 1036] cases per 100,000 population), age-standardized prevalence estimates (1521 [1448 to 1595] cases per 100,000 population), and age-standardized YLD rates (223 [157 to 303] YLDs per 100,000 population) in 2019. For SCI, Afghanistan had the largest age-standardized incidence rates (44 [12 to 132] cases per 100,000 population), and Syrian Arab Republic had the largest age-standardized prevalence estimates (1049 [333 to 2942] cases per 100,000 population) and age-standardized YLD rates (403 [113 to 1150] YLDs per 100,000 population) in 2019.

### Leading Causes by Country and Territory

By falls, the countries/territories with the top three largest increase in age-standardized incidence rates of TBI from 1990 to 2019 were Turkey (100.3% [88.8% to 114.5%]), Bhutan (96.7% [86.9% to 108.0%]), and Cambodia (73.5% [67.6% to 79.9%]), and the top three decreasing rates were in Democratic People's Republic of Korea (-38.1% [-40.2% to -35.8%]), Armenia (-35.1% [-41.2% to -28.4%]), and Latvia (-34.6% [-38.4% to -30.9%]) (out of 150 countries/territories). By pedestrian road injuries, the top three countries/territories by increasing rates were Lesotho (49.5% [38.4% to 59.9%]), Cabo Verde (28.1% [19.2% to 37.2%]), and Ghana (18.3% [11.2% to 26.6%]), and the top three countries/territories by decreasing rates were Zimbabwe (-32.5% [-38.5% to -26.4%]), Rwanda (-30.3% [-34.9% to -25.3%]), and South Sudan (-19.2% [-24.3% to -13.9%]) (out of 29 countries/territories). By motor vehicle road injuries, the countries/territories with the top three largest increase in rates were Dominican Republic (38.5% [24.0% to 54.6%]), Sao Tome and Principe (28.9% [20.0% to 38.6%]), and Seychelles (26.8% [15.3% to 39.3%]), and there were only two countries/territories had a significant decrease in their rates: South Africa (-26.0% [-30.5% to -21.3%]) and Mauritania (-11.2% [-17.4% to -4.2%]) (amongst the 11 included countries/territories).

Regarding change rates in falls (as a cause of SCI) from 1990 to 2019, the countries/territories with the largest increase in age-standardized incidence rates were Turkey (110.5% [97.3% to 125.4%]), Bhutan (101.1% [90.9% to 112.6%]), and Cambodia (76.5% [70.1% to 83.1%]), and the top largest declines were in Democratic People's Republic of Korea (-37.2% [-39.3% to -34.9%]), Latvia (-34.5% [-37.9% to -31.0%]), and Armenia (-33.9% [-39.3% to -27.9%]) (out of 198 countries/territories).

eFigure 1. Incidence of traumatic brain injury worldwide

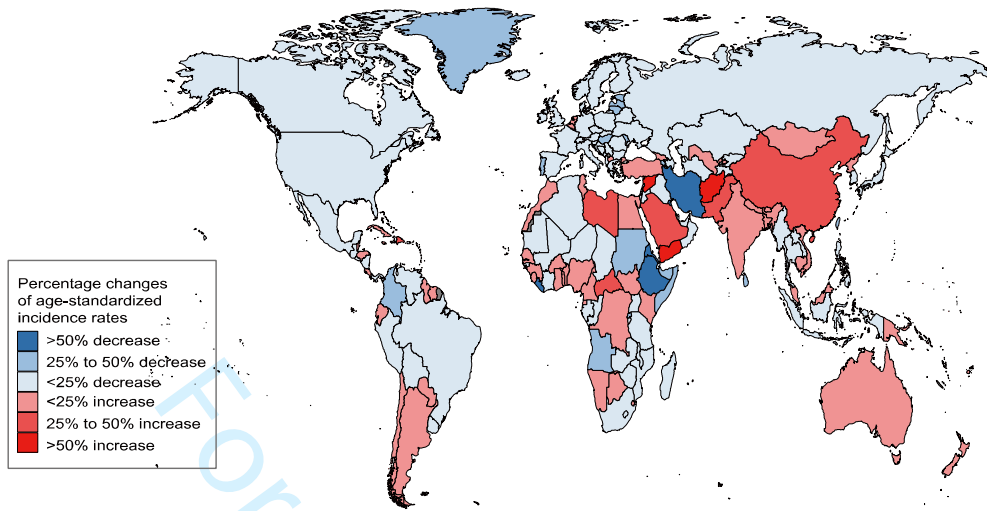

Percentage changes of age-standardized incidence rates of traumatic brain injury, 1990–2019



eFigure 2. Prevalence of traumatic brain injury worldwide

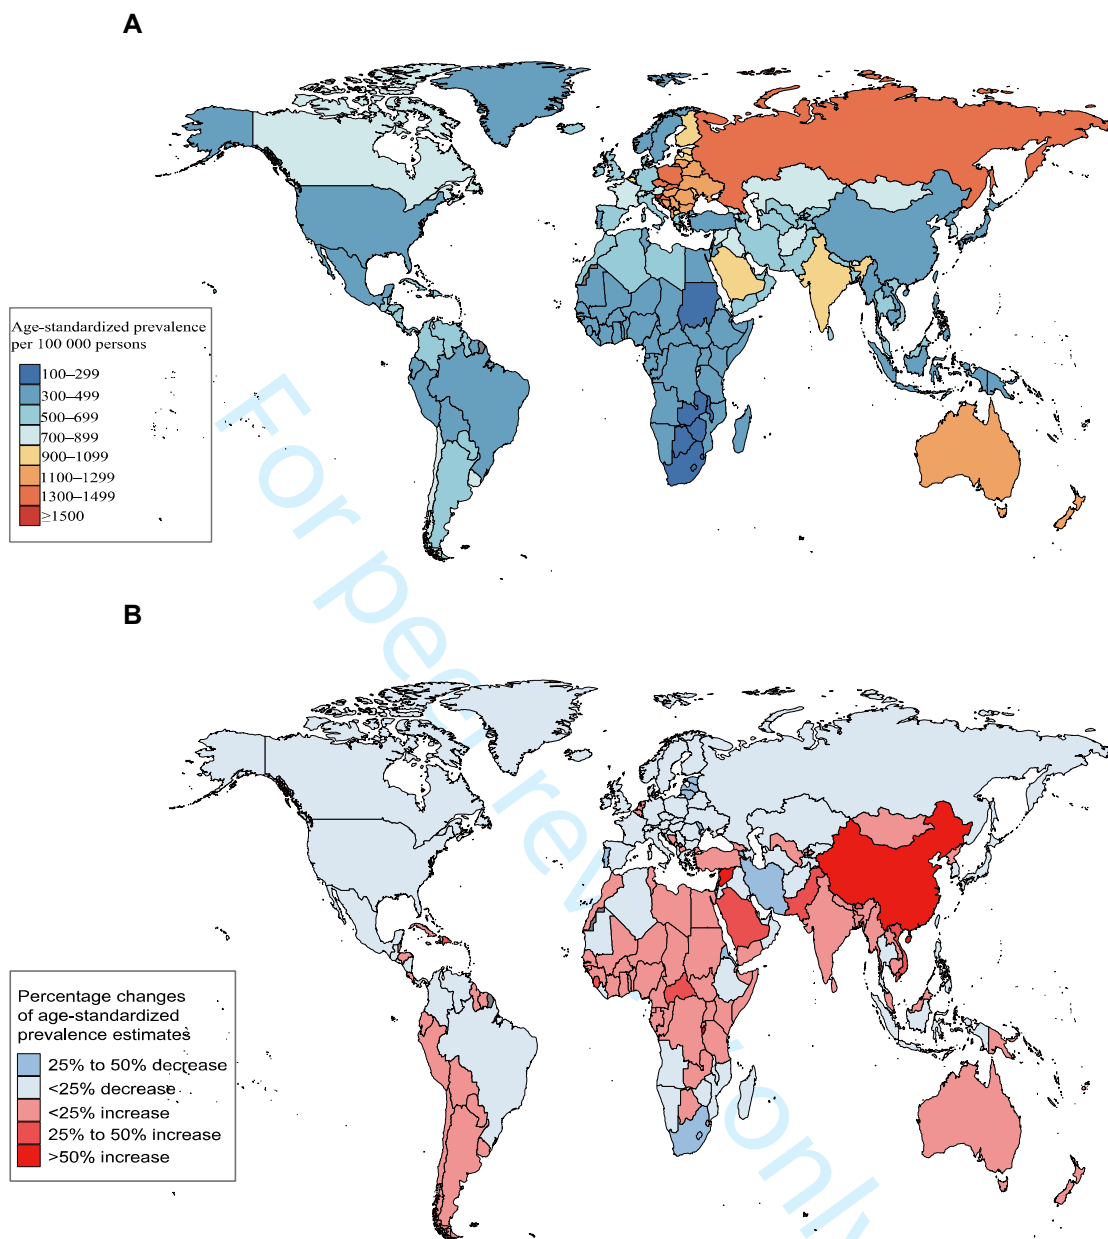

Age-standardized prevalence estimates per 100,000 persons of traumatic brain injury (TBI) by location, 2019 (A); Percentage changes of age-standardized prevalence estimates of TBI, 1990–2019 (B)

eFigure 3. Years lived with disability of traumatic brain injury worldwide

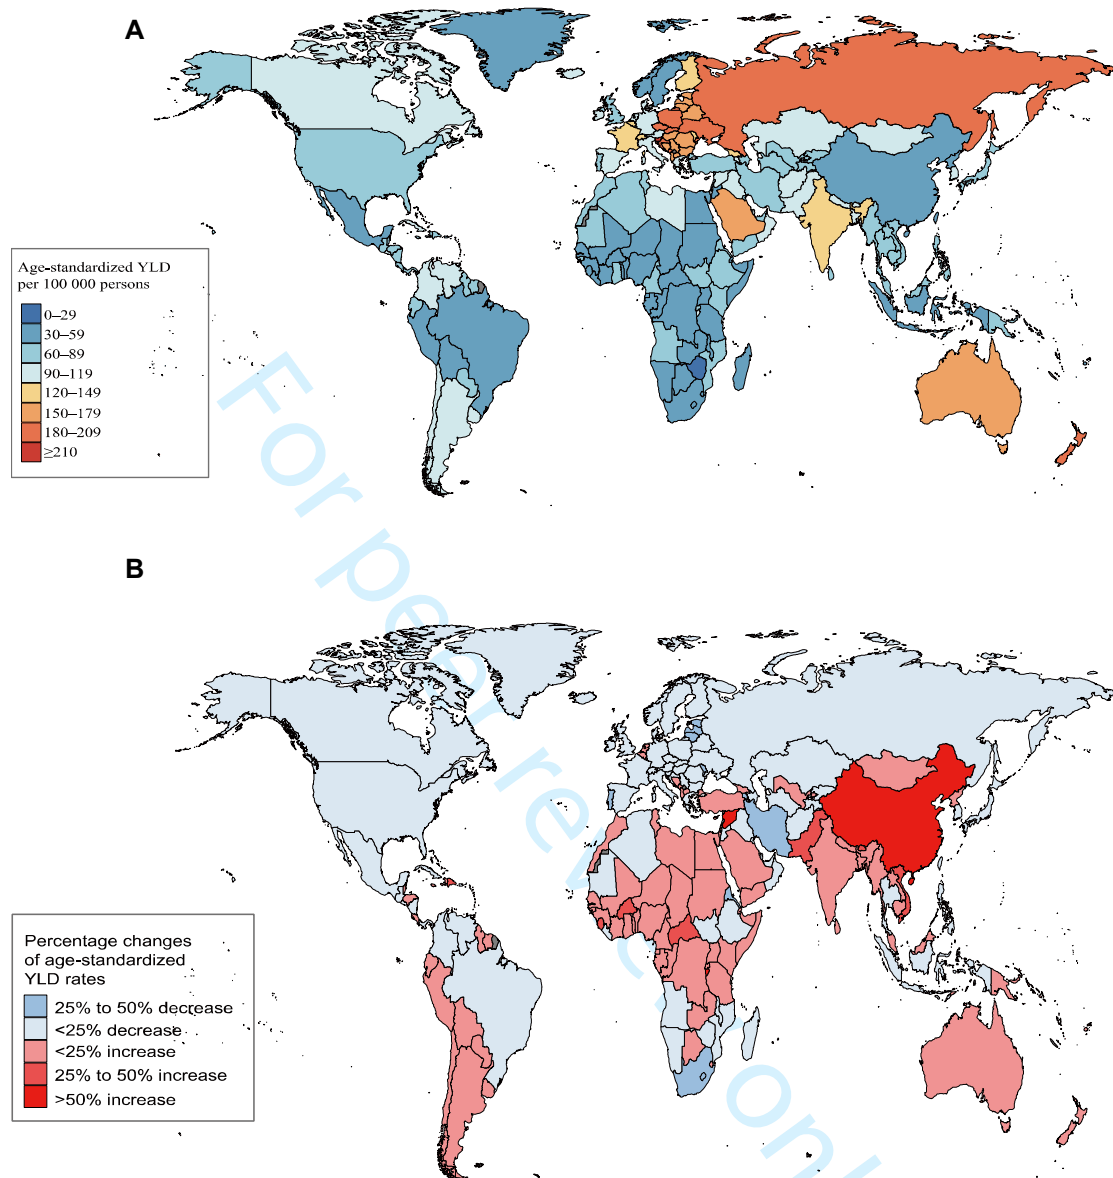

Age-standardized years lived with disability (YLDs) rates per 100,000 persons of traumatic brain injury (TBI) by location, 2019 (A); Percentage changes of age-standardized YLD rates of TBI, 1990–2019 (B)

eFigure 4. Incidence of spinal cord injury worldwide

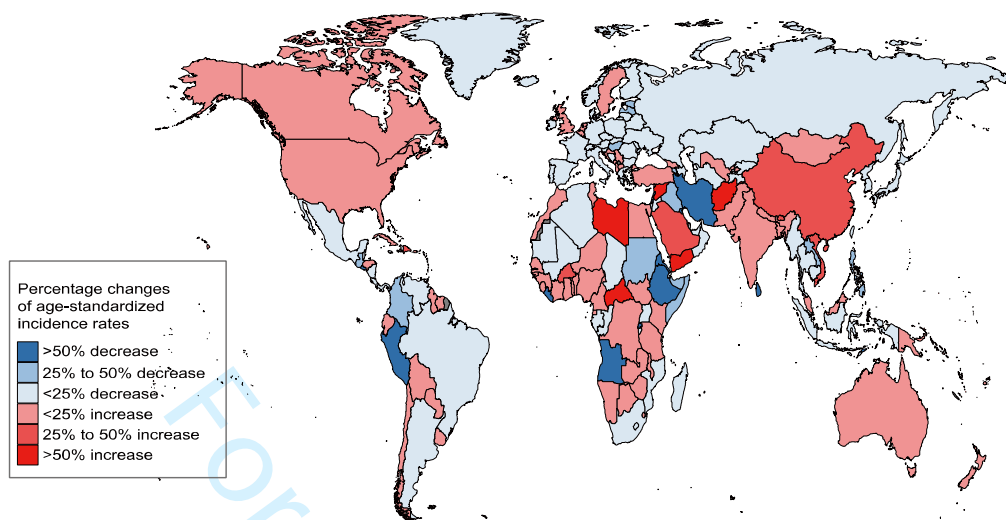

Percentage changes of age-standardized incidence rates of spinal cord injury, 1990–2019

eFigure 5. Prevalence of spinal cord injury worldwide

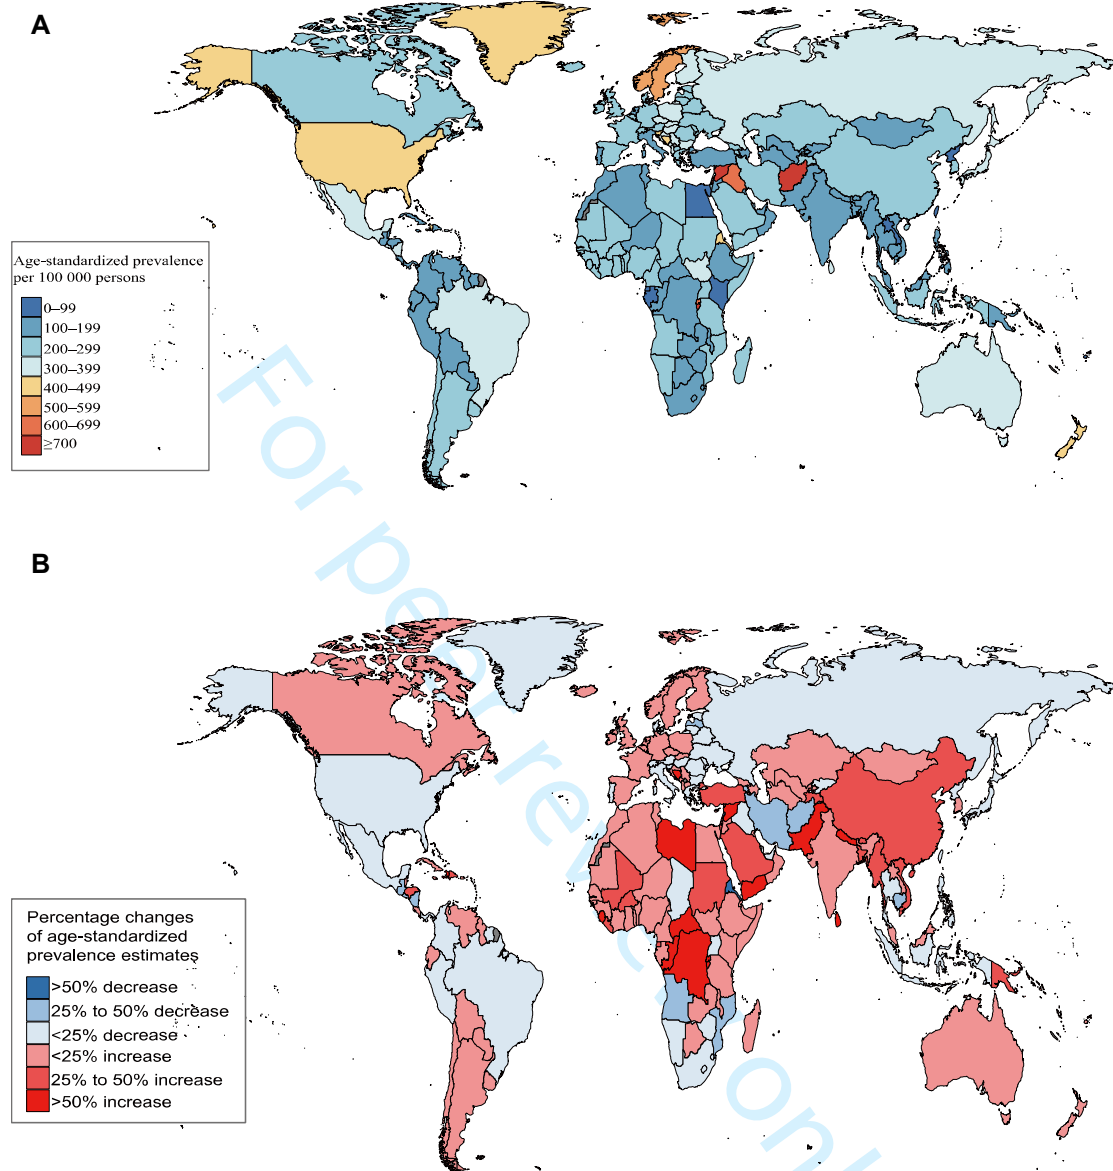

Age-standardized prevalence estimates per 100,000 persons of spinal cord injury (SCI) by location, 2019 (A);

Percentage changes of age-standardized prevalence estimates of SCI, 1990–2019 (B)

eFigure 6. Years lived with disability of spinal cord injury world

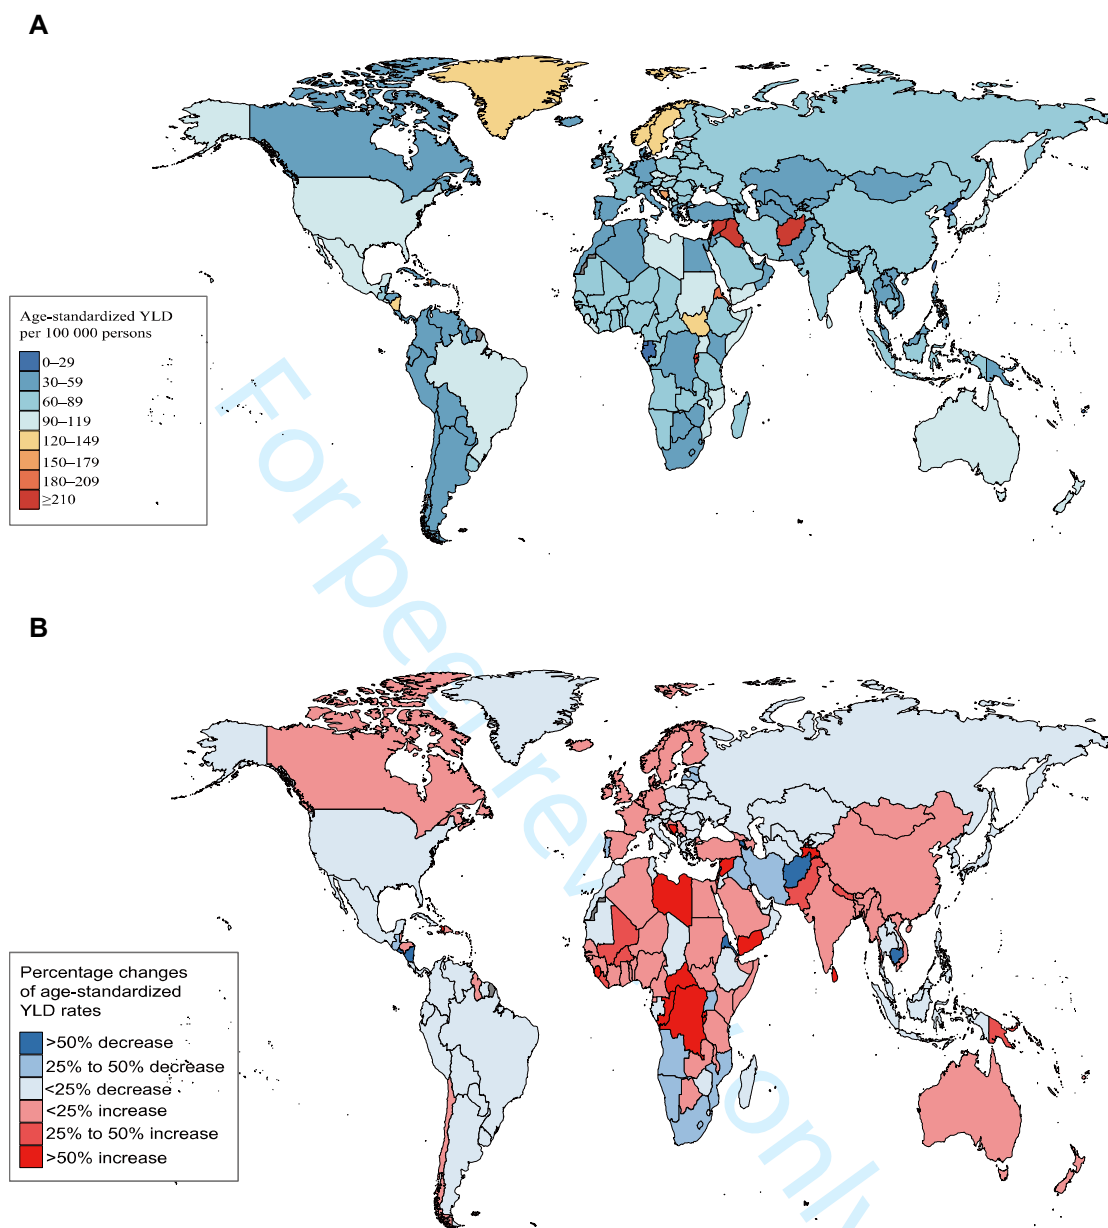

Age-standardized years lived with disability (YLDs) rates per 100,000 persons of spinal cord injury (SCI) by location, 2019 (A); Percentage changes of age-standardized YLD rates of SCI, 1990–2019 (B)

**eFigure 7. Associations between Socio-demographic Index (SDI) and age-standardized years lived with disability (YLDs) rates of traumatic brain injury and spinal cord injury in 204 countries and territories**

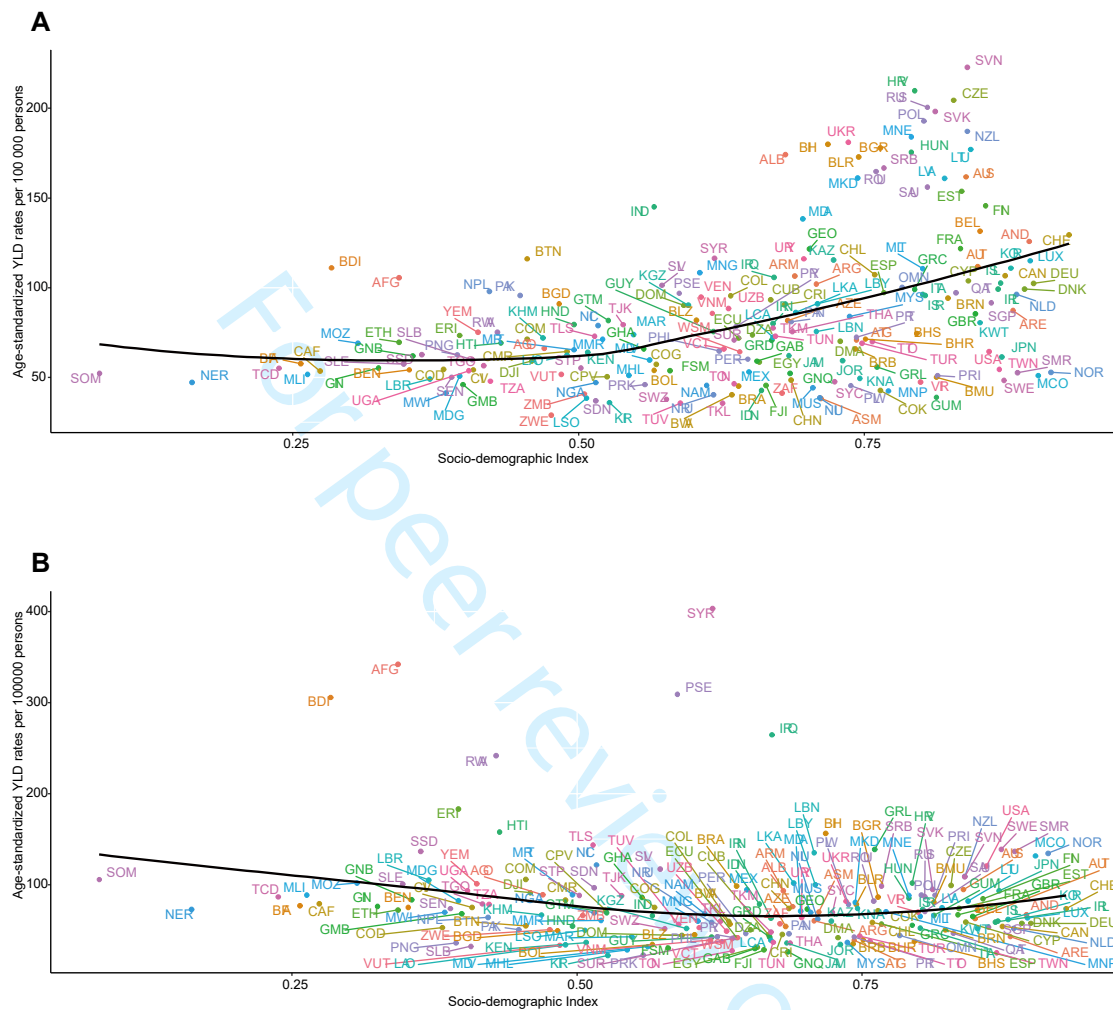

Associations between Socio-demographic Index (SDI) and age-standardized years lived with disability (YLDs) rates of traumatic brain injury (A) and spinal cord injury (B) in 204 countries and territories, 2019; each point is plotted for each country/territory and shows observed age-standardized YLD rates for that country/territory in 2019; expected values based on SDI and disease rates in all countries and territories are shown as the black line; the name of each country/territory is represented by its ISO3 codes; ISO3 codes of 204 countries and territories are presented in **eTable 6**

**Table 1. Global Burden of Disease detailed data sources for estimates of non-fatal injuries burden from 204 countries and territories**

| Location            | Total number of data sources | Total number of metadata | Data source citation                                                                                                                                                                                                                                                                                           |
|---------------------|------------------------------|--------------------------|----------------------------------------------------------------------------------------------------------------------------------------------------------------------------------------------------------------------------------------------------------------------------------------------------------------|
| Afghanistan         | 1                            | 7                        | Afghanistan Demographic and Health Survey 2015-2016                                                                                                                                                                                                                                                            |
| Albania             | 2                            | 510                      | Albania Demographic and Health Survey 2008-2009<br>Albania Reproductive Health Survey 2002                                                                                                                                                                                                                     |
| Algeria             | 0                            | 0                        |                                                                                                                                                                                                                                                                                                                |
| American Samoa      | 0                            | 0                        |                                                                                                                                                                                                                                                                                                                |
| Andorra             | 0                            | 0                        |                                                                                                                                                                                                                                                                                                                |
| Angola              | 0                            | 0                        |                                                                                                                                                                                                                                                                                                                |
| Antigua and Barbuda | 0                            | 0                        |                                                                                                                                                                                                                                                                                                                |
| Argentina           | 0                            | 0                        |                                                                                                                                                                                                                                                                                                                |
| Armenia             | 0                            | 0                        |                                                                                                                                                                                                                                                                                                                |
| Australia           | 0                            | 0                        |                                                                                                                                                                                                                                                                                                                |
| Austria             | 6                            | 240                      | Austria Hospital Inpatient Discharges 1989-1992<br>Austria Hospital Inpatient Discharges 1993-1997<br>Austria Hospital Inpatient Discharges 1998-2002<br>Austria Hospital Inpatient Discharges 2003-2007<br>Austria Hospital Inpatient Discharges 2008-2012<br>Austria Hospital Inpatient Discharges 2013-2014 |
| Azerbaijan          | 2                            | 10                       | Azerbaijan Demographic and Health Survey 2006<br>Azerbaijan Reproductive Health Survey 2001                                                                                                                                                                                                                    |
| Bahamas             | 0                            | 0                        |                                                                                                                                                                                                                                                                                                                |
| Bahrain             | 0                            | 0                        |                                                                                                                                                                                                                                                                                                                |
| Bangladesh          | 3                            | 280                      | Bangladesh World Health Survey 2003<br>Bangladesh Health and Injury Survey 2003<br>Bangladesh Demographic and Health Survey 2007                                                                                                                                                                               |
| Barbados            | 0                            | 0                        |                                                                                                                                                                                                                                                                                                                |
| Belarus             | 0                            | 0                        |                                                                                                                                                                                                                                                                                                                |
| Belgium             | 1                            | 2656                     | European Hospital Morbidity Database, 2008                                                                                                                                                                                                                                                                     |

|    |                                  |   |        |                                                                 |
|----|----------------------------------|---|--------|-----------------------------------------------------------------|
| 1  | Belize                           | 0 | 0      |                                                                 |
| 2  | Benin                            | 0 | 0      |                                                                 |
| 3  |                                  |   |        |                                                                 |
| 4  | Bermuda                          | 0 | 0      |                                                                 |
| 5  | Bhutan                           | 0 | 0      |                                                                 |
| 6  | Bolivia (Plurinational State of) | 1 | 15     | Bolivia Demographic and Health Survey 2008                      |
| 7  |                                  |   |        |                                                                 |
| 8  | Bosnia and Herzegovina           | 1 | 140    | Bosnia and Herzegovina World Health Survey 2003                 |
| 9  | Botswana                         | 2 | 514    | Botswana AIDS Impact Survey 2013                                |
| 10 |                                  |   |        | Botswana Health Management Data System 2008-2009                |
| 11 |                                  |   |        |                                                                 |
| 12 | Brazil                           | 6 | 173640 | Brazil World Health Survey 2003                                 |
| 13 |                                  |   |        | Brazil Hospital Information System 1997                         |
| 14 |                                  |   |        | Brazil Hospital Information System 1998-2002                    |
| 15 |                                  |   |        | Brazil Hospital Information System 2003-2007                    |
| 16 |                                  |   |        | Brazil Hospital Information System 2008-2012                    |
| 17 |                                  |   |        | Brazil Hospital Information System 2013-2014                    |
| 18 |                                  |   |        |                                                                 |
| 19 |                                  |   |        |                                                                 |
| 20 | Brunei Darussalam                | 0 | 0      |                                                                 |
| 21 | Bulgaria                         | 0 | 0      |                                                                 |
| 22 |                                  |   |        |                                                                 |
| 23 | Burkina Faso                     | 2 | 167    | Burkina Faso Demographic and Health Survey 2010-2011            |
| 24 |                                  |   |        | Burkina Faso World Health Survey 2002-2003                      |
| 25 | Burundi                          | 0 | 0      |                                                                 |
| 26 | Cabo Verde                       | 0 | 0      |                                                                 |
| 27 |                                  |   |        |                                                                 |
| 28 | Cambodia                         | 3 | 40     | Cambodia Demographic and Health Survey 2000                     |
| 29 |                                  |   |        | Cambodia Demographic and Health Survey 2005-2006                |
| 30 |                                  |   |        | Cambodia Demographic and Health Survey 2014                     |
| 31 |                                  |   |        |                                                                 |
| 32 | Cameroon                         | 1 | 14     | Cameroon Demographic and Health Survey 2004                     |
| 33 | Canada                           | 0 | 0      |                                                                 |
| 34 |                                  |   |        |                                                                 |
| 35 | Central African Republic         | 1 | 7      | Central African Republic Multiple Indicator Cluster Survey 2006 |
| 36 | Chad                             | 2 | 177    | Chad World Health Survey 2003                                   |
| 37 |                                  |   |        | Chad Demographic and Health Survey 2014-2015                    |
| 38 |                                  |   |        |                                                                 |
| 39 | Chile                            | 3 | 3984   | Chile Hospital Discharges 2001-2002                             |



|    |              |    |       |                                                                       |
|----|--------------|----|-------|-----------------------------------------------------------------------|
| 1  |              |    |       | Chile Hospital Discharges 2003-2007                                   |
| 2  |              |    |       | Chile Hospital Discharges 2008-2012                                   |
| 3  |              |    |       |                                                                       |
| 4  | China        | 15 | 62053 | China World Health Survey 2002                                        |
| 5  |              |    |       | China Health and Family Life Survey 1999-2000                         |
| 6  |              |    |       | China WHO Study on Global AGEing and Adult Health 2007-2010           |
| 7  |              |    |       |                                                                       |
| 8  |              |    |       | Hong Kong Injury Survey 2008                                          |
| 9  |              |    |       | China National Injury Surveillance System 2006 - China CDC            |
| 10 |              |    |       | China National Injury Surveillance System 2007 - China CDC            |
| 11 |              |    |       | China National Injury Surveillance System 2008 - China CDC            |
| 12 |              |    |       | China National Injury Surveillance System 2009 - China CDC            |
| 13 |              |    |       | China National Injury Surveillance System 2010 - China CDC            |
| 14 |              |    |       | China National Injury Surveillance System 2011 - China CDC            |
| 15 |              |    |       | China National Injury Surveillance System 2012 - China CDC            |
| 16 |              |    |       | China National Injury Surveillance System 2013 - China CDC            |
| 17 |              |    |       | China National Injury Surveillance System 2014 - China CDC            |
| 18 |              |    |       | China Injury Comprehensive Surveillance Study 2009-2011 - China CDC   |
| 19 |              |    |       | Prevalence of and Risk Factors for Intimate Partner Violence in China |
| 20 |              |    |       |                                                                       |
| 21 |              |    |       |                                                                       |
| 22 |              |    |       |                                                                       |
| 23 |              |    |       |                                                                       |
| 24 | Colombia     | 2  | 397   | Colombia National Health Survey 2007-2008                             |
| 25 |              |    |       | Colombia Demographic and Health Survey 2009-2010                      |
| 26 | Comoros      | 2  | 162   | Comoros World Health Survey 2003                                      |
| 27 |              |    |       | Comoros Demographic and Health Survey 2012-2013                       |
| 28 |              |    |       |                                                                       |
| 29 | Congo        | 1  | 135   | Congo World Health Survey 2003                                        |
| 30 | Cook Islands | 0  | 0     |                                                                       |
| 31 |              |    |       |                                                                       |
| 32 | Costa Rica   | 0  | 0     |                                                                       |
| 33 | Croatia      | 2  | 5467  | European Hospital Morbidity Database, 2008                            |
| 34 |              |    |       | Croatia World Health Survey 2003                                      |
| 35 |              |    |       |                                                                       |
| 36 | Cuba         | 0  | 0     |                                                                       |
| 37 | Cyprus       | 2  | 336   | European Hospital Morbidity Database, 2008                            |
| 38 |              |    |       | Cyprus European Health Interview Survey 2008                          |
| 39 |              |    |       |                                                                       |

40  
41  
42  
43  
44  
45  
46

|    |                                       |   |      |                                                                          |
|----|---------------------------------------|---|------|--------------------------------------------------------------------------|
| 1  | Czechia                               | 3 | 1492 | European Hospital Morbidity Database, 2008                               |
| 2  |                                       |   |      | Czech Republic World Health Survey 2002-2003                             |
| 3  |                                       |   |      | Czech Republic European Health Interview Survey 2008                     |
| 4  |                                       |   |      |                                                                          |
| 5  | Côte d'Ivoire                         | 2 | 167  | Côte d'Ivoire World Health Survey 2003                                   |
| 6  |                                       |   |      | Côte d'Ivoire Demographic and Health Survey 2011-2012                    |
| 7  |                                       |   |      |                                                                          |
| 8  | Democratic People's Republic of Korea | 0 | 0    |                                                                          |
| 9  |                                       |   |      |                                                                          |
| 10 | Democratic Republic of the Congo      | 1 | 7    | Democratic Republic of the Congo Demographic and Health Survey 2013-2014 |
| 11 |                                       |   |      |                                                                          |
| 12 |                                       |   |      |                                                                          |
| 13 | Denmark                               | 1 | 160  | European Hospital Morbidity Database, 2008                               |
| 14 | Djibouti                              | 0 | 0    |                                                                          |
| 15 |                                       |   |      |                                                                          |
| 16 | Dominica                              | 0 | 0    |                                                                          |
| 17 | Dominican Republic                    | 4 | 191  | Dominican Republic Demographic and Health Survey 2002                    |
| 18 |                                       |   |      | Dominican Republic Demographic and Health Survey 2007                    |
| 19 |                                       |   |      | Dominican Republic World Health Survey 2003                              |
| 20 |                                       |   |      | Dominican Republic Demographic and Health Survey 2013                    |
| 21 |                                       |   |      |                                                                          |
| 22 | Ecuador                               | 8 | 380  | Ecuador World Health Survey 2003                                         |
| 23 |                                       |   |      | Ecuador Reproductive Health Survey 1999                                  |
| 24 |                                       |   |      | Ecuador Reproductive Health Survey 2004                                  |
| 25 |                                       |   |      | Ecuador Hospital Inpatient Discharges 1993-1997                          |
| 26 |                                       |   |      | Ecuador Hospital Inpatient Discharges 1998-2002                          |
| 27 |                                       |   |      | Ecuador Hospital Inpatient Discharges 2003-2007                          |
| 28 |                                       |   |      | Ecuador Hospital Inpatient Discharges 2008-2012                          |
| 29 |                                       |   |      | Ecuador Hospital Inpatient Discharges 2013-2014                          |
| 30 |                                       |   |      |                                                                          |
| 31 |                                       |   |      |                                                                          |
| 32 |                                       |   |      |                                                                          |
| 33 | Egypt                                 | 2 | 14   | Egypt Demographic and Health Survey 2005                                 |
| 34 |                                       |   |      | Egypt Demographic and Health Survey 2014                                 |
| 35 |                                       |   |      |                                                                          |
| 36 | El Salvador                           | 2 | 14   | El Salvador Reproductive Health Survey 2002-2003                         |
| 37 |                                       |   |      | El Salvador Reproductive Health Survey 2008                              |
| 38 | Equatorial Guinea                     | 0 | 0    |                                                                          |
| 39 |                                       |   |      |                                                                          |

|    |           |   |      |                                                                                                                      |
|----|-----------|---|------|----------------------------------------------------------------------------------------------------------------------|
| 1  | Eritrea   | 0 | 0    |                                                                                                                      |
| 2  | Estonia   | 2 | 151  | Estonia World Health Survey 2003                                                                                     |
| 3  |           |   |      | Intimate partner violence and sexual health outcomes: a population-based study among 16-44-year-old women in Estonia |
| 4  |           |   |      |                                                                                                                      |
| 5  |           |   |      |                                                                                                                      |
| 6  | Eswatini  | 1 | 165  | Swaziland World Health Survey 2003                                                                                   |
| 7  |           |   |      |                                                                                                                      |
| 8  | Ethiopia  | 3 | 252  | Ethiopia World Health Survey 2003                                                                                    |
| 9  |           |   |      | Ethiopia Demographic and Health Survey 2016                                                                          |
| 10 |           |   |      | Ethiopia STEPS Noncommunicable Disease Risk Factors Survey 2015                                                      |
| 11 |           |   |      |                                                                                                                      |
| 12 | Fiji      | 0 | 0    |                                                                                                                      |
| 13 | Finland   | 1 | 3984 | European Hospital Morbidity Database, 2008                                                                           |
| 14 | France    | 0 | 0    |                                                                                                                      |
| 15 |           |   |      |                                                                                                                      |
| 16 | Gabon     | 1 | 7    | Gabon Demographic and Health Survey 2012                                                                             |
| 17 | Gambia    | 1 | 7    | Gambia Demographic and Health Survey 2013                                                                            |
| 18 | Georgia   | 6 | 2755 | Georgia World Health Survey 2003                                                                                     |
| 19 |           |   |      | Georgia Reproductive Health Survey 1999-2000                                                                         |
| 20 |           |   |      | Georgia Reproductive Health Survey 2005                                                                              |
| 21 |           |   |      | Georgia Reproductive Health Survey 2010-2011                                                                         |
| 22 |           |   |      | Georgia Hospital Data 2013-2017                                                                                      |
| 23 |           |   |      | Georgia Hospital Discharges 2016-2017                                                                                |
| 24 |           |   |      |                                                                                                                      |
| 25 |           |   |      |                                                                                                                      |
| 26 | Germany   | 1 | 40   | Germany Hospital Discharges by Diagnosis 2009                                                                        |
| 27 |           |   |      |                                                                                                                      |
| 28 | Ghana     | 3 | 415  | Ghana World Health Survey 2003                                                                                       |
| 29 |           |   |      | Ghana WHO Study on Global AGEing and Adult Health 2007-2008                                                          |
| 30 |           |   |      | Ghana Demographic and Health Survey 2008                                                                             |
| 31 |           |   |      |                                                                                                                      |
| 32 | Greece    | 0 | 0    |                                                                                                                      |
| 33 | Greenland | 0 | 0    |                                                                                                                      |
| 34 | Grenada   | 0 | 0    |                                                                                                                      |
| 35 |           |   |      |                                                                                                                      |
| 36 | Guam      | 3 | 54   | United States Behavioral Risk Factor Surveillance System 2003                                                        |
| 37 |           |   |      | United States Behavioral Risk Factor Surveillance System 2008                                                        |
| 38 |           |   |      | United States Behavioral Risk Factor Surveillance System 2012                                                        |
| 39 |           |   |      |                                                                                                                      |

|    |               |    |      |                                                                                                         |
|----|---------------|----|------|---------------------------------------------------------------------------------------------------------|
| 1  | Guatemala     | 3  | 188  | Guatemala World Health Survey 2003                                                                      |
| 2  |               |    |      | Guatemala Reproductive Health Survey 2002                                                               |
| 3  |               |    |      | Guatemala Demographic and Health Survey 2014-2015                                                       |
| 4  |               |    |      |                                                                                                         |
| 5  | Guinea        | 1  | 7    | Guinea Demographic and Health Survey 2005                                                               |
| 6  | Guinea-Bissau | 0  | 0    |                                                                                                         |
| 7  |               |    |      |                                                                                                         |
| 8  | Guyana        | 0  | 0    |                                                                                                         |
| 9  | Haiti         | 3  | 21   | Haiti Demographic and Health Survey 2000                                                                |
| 10 |               |    |      | Haiti Demographic and Health Survey 2005-2006                                                           |
| 11 |               |    |      | Haiti Demographic and Health Survey 2012                                                                |
| 12 |               |    |      |                                                                                                         |
| 13 | Honduras      | 3  | 21   | Honduras Demographic and Health Survey 2005-2006                                                        |
| 14 |               |    |      | Honduras Reproductive Health Survey 2001                                                                |
| 15 |               |    |      | Honduras Demographic and Health Survey 2011-2012                                                        |
| 16 |               |    |      |                                                                                                         |
| 17 | Hungary       | 2  | 190  | Hungary World Health Survey 2003                                                                        |
| 18 |               |    |      | Hungary European Health Interview Survey 2009 - Eurostat                                                |
| 19 |               |    |      |                                                                                                         |
| 20 | Iceland       | 1  | 160  | European Hospital Morbidity Database, 2008                                                              |
| 21 | India         | 16 | 5756 | India Demographic and Health Survey 2005-2006                                                           |
| 22 |               |    |      | India World Health Survey 2003                                                                          |
| 23 |               |    |      | India WHO Study on Global Ageing and Adult Health 2007                                                  |
| 24 |               |    |      | Road use pattern and risk factors for non-fatal road traffic injuries among children in urban India     |
| 25 |               |    |      | India Demographic and Health Survey 2015-2016                                                           |
| 26 |               |    |      | Burden, distribution and impact of domestic accidents in a semi-urban area of coastal Tamil Nadu, India |
| 27 |               |    |      | Characteristics of non-fatal fall injuries in rural India                                               |
| 28 |               |    |      | India - Shillong Nazareth Hospital Inpatient Discharges 2014                                            |
| 29 |               |    |      | Incidence and burden of road traffic injuries in urban India [Unpublished data]                         |
| 30 |               |    |      | A population-based study on road traffic injuries in Pune City, India [Unpublished data]                |
| 31 |               |    |      | India Hospital Inpatient Data 2014-2017                                                                 |
| 32 |               |    |      | Epidemiology of injury in rural Pondicherry, India                                                      |
| 33 |               |    |      | Unintentional Childhood Injuries in Urban and Rural Ujjain, India: A Community-Based Survey             |
| 34 |               |    |      |                                                                                                         |
| 35 |               |    |      |                                                                                                         |
| 36 |               |    |      |                                                                                                         |
| 37 |               |    |      |                                                                                                         |
| 38 |               |    |      |                                                                                                         |
| 39 |               |    |      |                                                                                                         |
| 40 |               |    |      |                                                                                                         |
| 41 |               |    |      |                                                                                                         |
| 42 |               |    |      |                                                                                                         |
| 43 |               |    |      |                                                                                                         |
| 44 |               |    |      |                                                                                                         |
| 45 |               |    |      |                                                                                                         |
| 46 |               |    |      |                                                                                                         |

|    |                            |   |       |                                                                                                                            |
|----|----------------------------|---|-------|----------------------------------------------------------------------------------------------------------------------------|
| 1  |                            |   |       | A study of falls among elderly persons in a rural area of Haryana                                                          |
| 2  |                            |   |       | The characteristics of, and risk factors for, child injuries in Andhra Pradesh, India: the Young Lives project             |
| 3  |                            |   |       |                                                                                                                            |
| 4  |                            |   |       |                                                                                                                            |
| 5  |                            |   |       | Epidemiology of childhood injuries in rural Puducherry, South India                                                        |
| 6  | Indonesia                  | 1 | 14368 | Indonesia Integrated Hospital Data 2013                                                                                    |
| 7  |                            |   |       |                                                                                                                            |
| 8  | Iran (Islamic Republic of) | 6 | 333   | Iran Demographic and Health Survey 2000                                                                                    |
| 9  |                            |   |       | Incidence and characteristics of falls leading to hip fracture in Iranian population                                       |
| 10 |                            |   |       | Iran Hospital Data 2001-2010                                                                                               |
| 11 |                            |   |       | Epidemiology and mortality of burns in the South West of Iran                                                              |
| 12 |                            |   |       |                                                                                                                            |
| 13 |                            |   |       | Injury incidence, healthcare consumption and avenues for prevention: a household survey on injury in rural Twiserkan, Iran |
| 14 |                            |   |       |                                                                                                                            |
| 15 |                            |   |       | Population based estimates of non-fatal injuries in the capital of Iran                                                    |
| 16 |                            |   |       |                                                                                                                            |
| 17 | Iraq                       | 0 | 0     |                                                                                                                            |
| 18 | Ireland                    | 0 | 0     |                                                                                                                            |
| 19 |                            |   |       |                                                                                                                            |
| 20 | Israel                     | 0 | 0     |                                                                                                                            |
| 21 | Italy                      | 3 | 83664 | Italy Hospital Inpatient Discharges 2005-2007                                                                              |
| 22 |                            |   |       | Italy Hospital Inpatient Discharges 2008-2012                                                                              |
| 23 |                            |   |       | Italy Hospital Inpatient Discharges 2013-2016                                                                              |
| 24 |                            |   |       |                                                                                                                            |
| 25 | Jamaica                    | 0 | 0     |                                                                                                                            |
| 26 | Japan                      | 2 | 7708  | Japan Diagnosis Procedure Combination Database 2010-2012                                                                   |
| 27 |                            |   |       | Japan Diagnosis Procedure Combination Database 2013-2015                                                                   |
| 28 |                            |   |       |                                                                                                                            |
| 29 | Jordan                     | 3 | 137   | Jordan Al-Bashir Hospital Discharges 2016                                                                                  |
| 30 |                            |   |       | Jordan Demographic and Health Survey 2007                                                                                  |
| 31 |                            |   |       | Jordan Demographic and Health Survey 2012                                                                                  |
| 32 |                            |   |       |                                                                                                                            |
| 33 | Kazakhstan                 | 2 | 147   | Kazakhstan World Health Survey 2002-2003                                                                                   |
| 34 |                            |   |       | Kazakhstan Multiple Indicator Cluster Survey 2010-2011                                                                     |
| 35 |                            |   |       |                                                                                                                            |
| 36 | Kenya                      | 7 | 1545  | Kenya Demographic and Health Survey 2003                                                                                   |
| 37 |                            |   |       | Kenya Demographic and Health Survey 2008-2009                                                                              |
| 38 |                            |   |       | Kenya World Health Survey 2004                                                                                             |
| 39 |                            |   |       |                                                                                                                            |

|    |                                  |   |      |                                                                  |
|----|----------------------------------|---|------|------------------------------------------------------------------|
| 1  |                                  |   |      | Kenya Violence Against Children Study 2010                       |
| 2  |                                  |   |      | Kenya National Inpatient Morbidity and Mortality Statistics 1999 |
| 3  |                                  |   |      | Kenya Demographic and Health Survey 2014                         |
| 4  |                                  |   |      | Kenya STEPS Noncommunicable Disease Risk Factors Survey 2015     |
| 5  |                                  |   |      |                                                                  |
| 6  | Kiribati                         | 1 | 1    | Kiribati Family Health and Support Study 2008                    |
| 7  |                                  |   |      |                                                                  |
| 8  | Kuwait                           | 0 | 0    |                                                                  |
| 9  |                                  |   |      |                                                                  |
| 10 | Kyrgyzstan                       | 1 | 6    | Kyrgyzstan Demographic and Health Survey 2012                    |
| 11 |                                  |   |      |                                                                  |
| 12 | Lao People's Democratic Republic | 1 | 165  | Laos World Health Survey 2003                                    |
| 13 |                                  |   |      |                                                                  |
| 14 | Latvia                           | 3 | 500  | European Hospital Morbidity Database, 2008                       |
| 15 |                                  |   |      | Latvia World Health Survey 2003                                  |
| 16 |                                  |   |      | Latvia European Health Interview Survey 2008 - Eurostat          |
| 17 |                                  |   |      |                                                                  |
| 18 | Lebanon                          | 0 | 0    |                                                                  |
| 19 |                                  |   |      |                                                                  |
| 20 | Lesotho                          | 0 | 0    |                                                                  |
| 21 |                                  |   |      |                                                                  |
| 22 | Liberia                          | 1 | 7    | Liberia Demographic and Health Survey 2006-2007                  |
| 23 |                                  |   |      |                                                                  |
| 24 | Libya                            | 0 | 0    |                                                                  |
| 25 |                                  |   |      |                                                                  |
| 26 | Lithuania                        | 1 | 480  | European Hospital Morbidity Database, 2008                       |
| 27 |                                  |   |      |                                                                  |
| 28 | Luxembourg                       | 1 | 480  | European Hospital Morbidity Database, 2008                       |
| 29 |                                  |   |      |                                                                  |
| 30 | Madagascar                       | 0 | 0    |                                                                  |
| 31 |                                  |   |      |                                                                  |
| 32 | Malawi                           | 4 | 171  | Malawi Demographic and Health Survey 2004-2005                   |
| 33 |                                  |   |      | Malawi Demographic and Health Survey 2010                        |
| 34 |                                  |   |      | Malawi World Health Survey 2003                                  |
| 35 |                                  |   |      | Malawi Demographic and Health Survey 2015-2016                   |
| 36 |                                  |   |      |                                                                  |
| 37 | Malaysia                         | 1 | 160  | Malaysia World Health Survey 2003                                |
| 38 |                                  |   |      |                                                                  |
| 39 | Maldives                         | 0 | 0    |                                                                  |
| 40 |                                  |   |      |                                                                  |
| 41 | Mali                             | 2 | 177  | Mali World Health Survey 2003                                    |
| 42 |                                  |   |      | Mali Demographic and Health Survey 2012-2013                     |
| 43 |                                  |   |      |                                                                  |
| 44 | Malta                            | 1 | 1488 | European Hospital Morbidity Database, 2008                       |
| 45 |                                  |   |      |                                                                  |
| 46 | Marshall Islands                 | 0 | 0    |                                                                  |

|    |                              |    |        |                                                                        |
|----|------------------------------|----|--------|------------------------------------------------------------------------|
| 1  | Mauritania                   | 1  | 155    | Mauritania World Health Survey 2003                                    |
| 2  | Mauritius                    | 1  | 155    | Mauritius World Health Survey 2003                                     |
| 3  |                              |    |        |                                                                        |
| 4  | Mexico                       | 7  | 132660 | Mexico National Health Survey 1999-2000                                |
| 5  |                              |    |        | Mexico National Addiction Survey 2008                                  |
| 6  |                              |    |        | Mexico National Addiction Survey 2011                                  |
| 7  |                              |    |        |                                                                        |
| 8  |                              |    |        | Mexico WHO Study on Global AGEing and Adult Health 2009-2010           |
| 9  |                              |    |        | Mexico Ministry of Health Hospital Discharges 2000-2002                |
| 10 |                              |    |        | Mexico Ministry of Health Hospital Discharges 2003-2007                |
| 11 |                              |    |        |                                                                        |
| 12 |                              |    |        | Mexico Ministry of Health Hospital Discharges 2008-2012                |
| 13 | Micronesia (Federated States |    |        |                                                                        |
| 14 | of)                          | 0  | 0      |                                                                        |
| 15 |                              |    |        |                                                                        |
| 16 | Monaco                       | 0  | 0      |                                                                        |
| 17 | Mongolia                     | 0  | 0      |                                                                        |
| 18 | Montenegro                   | 0  | 0      |                                                                        |
| 19 |                              |    |        |                                                                        |
| 20 | Morocco                      | 1  | 170    | Morocco World Health Survey 2003                                       |
| 21 | Mozambique                   | 2  | 593    | Mozambique Demographic and Health Survey 2003-2004                     |
| 22 |                              |    |        | Mozambique Demographic and Health Survey 2011                          |
| 23 |                              |    |        |                                                                        |
| 24 | Myanmar                      | 2  | 162    | Myanmar World Health Survey 2003                                       |
| 25 |                              |    |        | Myanmar Demographic and Health Survey 2015-2016                        |
| 26 | Namibia                      | 2  | 174    | Namibia World Health Survey 2003                                       |
| 27 |                              |    |        | Namibia Demographic and Health Survey 2013                             |
| 28 |                              |    |        |                                                                        |
| 29 | Nauru                        | 0  | 0      |                                                                        |
| 30 | Nepal                        | 5  | 1416   | Nepal World Health Survey 2003                                         |
| 31 |                              |    |        | Nepal Hospital Inpatient Discharges 2010-2012                          |
| 32 |                              |    |        | Nepal Hospital Inpatient Discharges 2013-2014                          |
| 33 |                              |    |        | Nepal Demographic and Health Survey 2011                               |
| 34 |                              |    |        | Women's Status and Violence against Young Married Women in Rural Nepal |
| 35 |                              |    |        |                                                                        |
| 36 |                              |    |        |                                                                        |
| 37 | Netherlands                  | 15 | 11332  | Netherlands Injury Surveillance System 1998                            |
| 38 |                              |    |        | Netherlands Injury Surveillance System 1999                            |
| 39 |                              |    |        |                                                                        |
| 40 |                              |    |        |                                                                        |
| 41 |                              |    |        |                                                                        |
| 42 |                              |    |        |                                                                        |
| 43 |                              |    |        |                                                                        |
| 44 |                              |    |        |                                                                        |
| 45 |                              |    |        |                                                                        |
| 46 |                              |    |        |                                                                        |

|    |             |    |       |                                                                  |
|----|-------------|----|-------|------------------------------------------------------------------|
| 1  |             |    |       | Netherlands Injury Surveillance System 2000                      |
| 2  |             |    |       | Netherlands Injury Surveillance System 2001                      |
| 3  |             |    |       | Netherlands Injury Surveillance System 2002                      |
| 4  |             |    |       | Netherlands Injury Surveillance System 2003                      |
| 5  |             |    |       | Netherlands Injury Surveillance System 2004                      |
| 6  |             |    |       | Netherlands Injury Surveillance System 2005                      |
| 7  |             |    |       | Netherlands Injury Surveillance System 2006                      |
| 8  |             |    |       | Netherlands Injury Surveillance System 2007                      |
| 9  |             |    |       | Netherlands Injury Surveillance System 2008                      |
| 10 |             |    |       | Netherlands Injury Surveillance System 2009                      |
| 11 |             |    |       | Netherlands Injury Surveillance System 2010                      |
| 12 |             |    |       | Netherlands Injury Surveillance System 2011                      |
| 13 |             |    |       | Netherlands Injury Surveillance System 2012                      |
| 14 |             |    |       | Netherlands Injury Surveillance System 2013                      |
| 15 |             |    |       | Netherlands Injury Surveillance System 2014                      |
| 16 |             |    |       | Netherlands Injury Surveillance System 2015                      |
| 17 |             |    |       | Netherlands Injury Surveillance System 2016                      |
| 18 | New Zealand | 15 | 19406 | New Zealand National Minimum Dataset 2000-2002                   |
| 19 |             |    |       | New Zealand National Minimum Dataset 2003-2007                   |
| 20 |             |    |       | New Zealand National Minimum Dataset 2008-2012                   |
| 21 |             |    |       | New Zealand National Minimum Dataset 2013-2014                   |
| 22 |             |    |       | New Zealand Accident Compensation Corporation Injury Claims 2015 |
| 23 |             |    |       | New Zealand Accident Compensation Corporation Injury Claims 2016 |
| 24 |             |    |       | New Zealand Accident Compensation Corporation Injury Claims 2017 |
| 25 |             |    |       | New Zealand Accident Compensation Corporation Injury Claims 2014 |
| 26 |             |    |       | New Zealand Accident Compensation Corporation Injury Claims 2013 |
| 27 |             |    |       | New Zealand Accident Compensation Corporation Injury Claims 2012 |
| 28 |             |    |       | New Zealand Accident Compensation Corporation Injury Claims 2011 |
| 29 |             |    |       | New Zealand Accident Compensation Corporation Injury Claims 2010 |
| 30 |             |    |       | New Zealand Accident Compensation Corporation Injury Claims 2009 |
| 31 |             |    |       | New Zealand Accident Compensation Corporation Injury Claims 2008 |
| 32 |             |    |       | New Zealand National Minimum Dataset 2016-2017                   |
| 33 |             |    |       | New Zealand National Minimum Dataset 2015-2016                   |
| 34 |             |    |       | New Zealand National Minimum Dataset 2014-2015                   |
| 35 |             |    |       | New Zealand National Minimum Dataset 2013-2014                   |
| 36 |             |    |       | New Zealand National Minimum Dataset 2012-2013                   |
| 37 |             |    |       | New Zealand National Minimum Dataset 2011-2012                   |
| 38 |             |    |       | New Zealand National Minimum Dataset 2010-2011                   |
| 39 | Nicaragua   | 2  | 14    | Nicaragua Reproductive Health Survey 2006-2007                   |



|    |                          |   |       |                                                                                         |
|----|--------------------------|---|-------|-----------------------------------------------------------------------------------------|
| 1  |                          |   |       | Nicaragua Demographic and Health Survey 1997-1998                                       |
| 2  | Niger                    | 0 | 0     |                                                                                         |
| 3  |                          |   |       |                                                                                         |
| 4  | Nigeria                  | 3 | 520   | The burden of road traffic injuries in Nigeria: results of a population-based survey    |
| 5  |                          |   |       | Nigeria Demographic and Health Survey 2008                                              |
| 6  |                          |   |       | Nigeria Demographic and Health Survey 2013                                              |
| 7  |                          |   |       |                                                                                         |
| 8  | Niue                     | 0 | 0     |                                                                                         |
| 9  | North Macedonia          | 0 | 0     |                                                                                         |
| 10 | Northern Mariana Islands | 0 | 0     |                                                                                         |
| 11 |                          |   |       |                                                                                         |
| 12 | Norway                   | 1 | 1128  | Norway Patient Register 2008-2012                                                       |
| 13 | Oman                     | 0 | 0     |                                                                                         |
| 14 | Pakistan                 | 2 | 173   | Pakistan World Health Survey 2003-2004                                                  |
| 15 |                          |   |       |                                                                                         |
| 16 |                          |   |       | Burden of fall injuries in Pakistan--analysis of the National Injury Survey of Pakistan |
| 17 | Palau                    | 0 | 0     |                                                                                         |
| 18 | Palestine                | 0 | 0     |                                                                                         |
| 19 |                          |   |       |                                                                                         |
| 20 | Panama                   | 0 | 0     |                                                                                         |
| 21 | Papua New Guinea         | 0 | 0     |                                                                                         |
| 22 | Paraguay                 | 3 | 162   | Paraguay Reproductive Health Survey 2004                                                |
| 23 |                          |   |       |                                                                                         |
| 24 |                          |   |       | Paraguay World Health Survey 2002-2003                                                  |
| 25 |                          |   |       | Paraguay Reproductive Health Survey 2008                                                |
| 26 | Peru                     | 1 | 7     | Peru Continuous Demographic and Health Survey 2014 - INEI                               |
| 27 |                          |   |       |                                                                                         |
| 28 | Philippines              | 4 | 2495  | Philippines World Health Survey 2003                                                    |
| 29 |                          |   |       | Philippine Health Insurance Corporation Claims 2013-2016                                |
| 30 |                          |   |       | Philippines Demographic and Health Survey 2008                                          |
| 31 |                          |   |       | Philippines Demographic and Health Survey 2013                                          |
| 32 |                          |   |       |                                                                                         |
| 33 | Poland                   | 4 | 47840 | European Hospital Morbidity Database, 2008                                              |
| 34 |                          |   |       | Poland National Health Fund Patient Claims 2015                                         |
| 35 |                          |   |       | Poland National Health Fund Patient Claims 2016                                         |
| 36 |                          |   |       | Poland National Health Fund Patient Claims 2017                                         |
| 37 |                          |   |       |                                                                                         |
| 38 | Portugal                 | 1 | 1166  | Portugal Hospital Inpatient Discharges 2015                                             |
| 39 |                          |   |       |                                                                                         |
| 40 |                          |   |       |                                                                                         |
| 41 |                          |   |       |                                                                                         |
| 42 |                          |   |       |                                                                                         |
| 43 |                          |   |       |                                                                                         |
| 44 |                          |   |       |                                                                                         |
| 45 |                          |   |       |                                                                                         |
| 46 |                          |   |       |                                                                                         |

|    |                                  |   |      |                                                                                                                                             |
|----|----------------------------------|---|------|---------------------------------------------------------------------------------------------------------------------------------------------|
| 1  | Puerto Rico                      | 6 | 131  | United States Behavioral Risk Factor Surveillance System 2003                                                                               |
| 2  |                                  |   |      | United States Behavioral Risk Factor Surveillance System 2005                                                                               |
| 3  |                                  |   |      | United States Behavioral Risk Factor Surveillance System 2006                                                                               |
| 4  |                                  |   |      | United States Behavioral Risk Factor Surveillance System 2007                                                                               |
| 5  |                                  |   |      | United States Behavioral Risk Factor Surveillance System 2008                                                                               |
| 6  |                                  |   |      | United States Behavioral Risk Factor Surveillance System 2012                                                                               |
| 9  | Qatar                            | 3 | 96   | Qatar - Annual Inpatients Discharge Abstract: Hamad General Hospital 2002                                                                   |
| 10 |                                  |   |      | Qatar - Annual Inpatients Discharge Abstract: Hamad General Hospital and Women's Hospital 2003                                              |
| 11 |                                  |   |      | Qatar STEPS Noncommunicable Disease Risk Factors Survey 2012                                                                                |
| 13 | Republic of Korea                | 0 | 0    |                                                                                                                                             |
| 14 | Republic of Moldova              | 1 | 7    | Moldova Demographic and Health Survey 2005                                                                                                  |
| 15 | Romania                          | 4 | 199  | European Hospital Morbidity Database, 2008                                                                                                  |
| 17 |                                  |   |      | Romania Reproductive Health Survey 1999                                                                                                     |
| 18 |                                  |   |      | Romania Reproductive Health Survey 2004                                                                                                     |
| 19 |                                  |   |      | Romania European Health Interview Survey 2008 - Eurostat                                                                                    |
| 21 | Russian Federation               | 2 | 3520 | Russia World Health Survey 2003                                                                                                             |
| 22 |                                  |   |      | Russia WHO Study on Global AGEing and Adult Health 2007-2010                                                                                |
| 24 | Rwanda                           | 4 | 38   | Rwanda Demographic and Health Survey 2005                                                                                                   |
| 25 |                                  |   |      | Rwanda Demographic and Health Survey 2010-2011                                                                                              |
| 26 |                                  |   |      | Rwanda Demographic and Health Survey 2014-2015                                                                                              |
| 28 |                                  |   |      | Women are considerably more exposed to intimate partner violence than men in Rwanda: results from a population-based, cross-sectional study |
| 30 | Saint Kitts and Nevis            | 0 | 0    |                                                                                                                                             |
| 31 | Saint Lucia                      | 0 | 0    |                                                                                                                                             |
| 33 | Saint Vincent and the Grenadines | 0 | 0    |                                                                                                                                             |
| 35 | Samoa                            | 1 | 1    | Samoa Family Health and Safety Study 2000                                                                                                   |
| 37 | San Marino                       | 0 | 0    |                                                                                                                                             |
| 38 | Sao Tome and Principe            | 1 | 7    | Sao Tome and Principe Demographic and Health Survey 2008-2009                                                                               |

|    |                 |    |      |                                                                                              |
|----|-----------------|----|------|----------------------------------------------------------------------------------------------|
| 1  | Saudi Arabia    | 0  | 0    |                                                                                              |
| 2  | Senegal         | 2  | 157  | Senegal World Health Survey 2003                                                             |
| 3  |                 |    |      | Senegal Demographic and Health Survey 2005                                                   |
| 4  |                 |    |      |                                                                                              |
| 5  | Serbia          | 1  | 160  | European Hospital Morbidity Database, 2008                                                   |
| 6  | Seychelles      | 0  | 0    |                                                                                              |
| 7  |                 |    |      |                                                                                              |
| 8  | Sierra Leone    | 1  | 16   | Sierra Leone Demographic and Health Survey 2013                                              |
| 9  | Singapore       | 0  | 0    |                                                                                              |
| 10 | Slovakia        | 2  | 620  | Slovakia World Health Survey 2003                                                            |
| 11 |                 |    |      | European Hospital Morbidity Database, 2008                                                   |
| 12 |                 |    |      |                                                                                              |
| 13 | Slovenia        | 2  | 2806 | European Hospital Morbidity Database, 2008                                                   |
| 14 |                 |    |      | Slovenia World Health Survey 2003                                                            |
| 15 |                 |    |      |                                                                                              |
| 16 | Solomon Islands | 0  | 0    |                                                                                              |
| 17 | Somalia         | 0  | 0    |                                                                                              |
| 18 | South Africa    | 5  | 5489 | South Africa Demographic and Health Survey 1998                                              |
| 19 |                 |    |      | South Africa World Health Survey 2002-2003                                                   |
| 20 |                 |    |      | South Africa WHO Study on Global AGEing and Adult Health 2007-2008                           |
| 21 |                 |    |      | Prevalence of emotional, physical and sexual abuse of women in three South African provinces |
| 22 |                 |    |      | South Africa National HIV Prevalence, Incidence, Behavior and Communication Survey 2008-2009 |
| 23 |                 |    |      |                                                                                              |
| 24 |                 |    |      |                                                                                              |
| 25 | South Sudan     | 0  | 0    |                                                                                              |
| 26 | Spain           | 2  | 265  | Spain World Health Survey 2002-2003                                                          |
| 27 |                 |    |      | Spain Household Survey on Alcohol and Drugs 2007-2008                                        |
| 28 |                 |    |      |                                                                                              |
| 29 | Sri Lanka       | 1  | 155  | Sri Lanka World Health Survey 2003                                                           |
| 30 | Sudan           | 0  | 0    |                                                                                              |
| 31 |                 |    |      |                                                                                              |
| 32 | Suriname        | 0  | 0    |                                                                                              |
| 33 | Sweden          | 16 | 2234 | Sweden National Patient Register 2001                                                        |
| 34 |                 |    |      | Sweden National Patient Register 2002                                                        |
| 35 |                 |    |      | Sweden National Patient Register 2003                                                        |
| 36 |                 |    |      | Sweden National Patient Register 2004                                                        |
| 37 |                 |    |      | Sweden National Patient Register 2005                                                        |
| 38 |                 |    |      |                                                                                              |
| 39 |                 |    |      |                                                                                              |
| 40 |                 |    |      |                                                                                              |
| 41 |                 |    |      |                                                                                              |
| 42 |                 |    |      |                                                                                              |
| 43 |                 |    |      |                                                                                              |
| 44 |                 |    |      |                                                                                              |
| 45 |                 |    |      |                                                                                              |
| 46 |                 |    |      |                                                                                              |

|    |                            |   |      |                                                                                                                           |
|----|----------------------------|---|------|---------------------------------------------------------------------------------------------------------------------------|
| 1  |                            |   |      | Sweden National Patient Register 2006                                                                                     |
| 2  |                            |   |      | Sweden National Patient Register 2007                                                                                     |
| 3  |                            |   |      | Sweden National Patient Register 2008                                                                                     |
| 4  |                            |   |      | Sweden National Patient Register 2009                                                                                     |
| 5  |                            |   |      | Sweden National Patient Register 2010                                                                                     |
| 6  |                            |   |      | Sweden National Patient Register 2011                                                                                     |
| 7  |                            |   |      | Sweden National Patient Register 2012                                                                                     |
| 8  |                            |   |      | Sweden National Patient Register 1998-2002                                                                                |
| 9  |                            |   |      | Sweden National Patient Register 2003-2007                                                                                |
| 10 |                            |   |      | Sweden National Patient Register 2008-2012                                                                                |
| 11 |                            |   |      | Sweden National Patient Register 1998-2002                                                                                |
| 12 |                            |   |      | Sweden National Patient Register 2003-2007                                                                                |
| 13 |                            |   |      | Sweden National Patient Register 2008-2012                                                                                |
| 14 |                            |   |      | Self-reported exposure to intimate partner violence among women and men in Sweden: results from a population-based survey |
| 15 |                            |   |      |                                                                                                                           |
| 16 |                            |   |      |                                                                                                                           |
| 17 | Switzerland                | 1 | 3984 | European Hospital Morbidity Database, 2008                                                                                |
| 18 | Syrian Arab Republic       | 1 | 4    | Injuries in Aleppo, Syria; first population-based estimates and characterization of predominant types                     |
| 19 | Taiwan (Province of China) | 0 | 0    |                                                                                                                           |
| 20 | Tajikistan                 | 1 | 7    | Tajikistan Demographic and Health Survey 2012                                                                             |
| 21 | Thailand                   | 1 | 48   | Thailand National Injury Survey 2003-2004                                                                                 |
| 22 | Timor-Leste                | 1 | 7    | Timor-Leste Demographic and Health Survey 2009-2010                                                                       |
| 23 | Togo                       | 1 | 7    | Togo Demographic and Health Survey 2013-2014                                                                              |
| 24 | Tokelau                    | 0 | 0    |                                                                                                                           |
| 25 | Tonga                      | 1 | 6    | Tonga National Study on Domestic Violence Against Women 2008-2009                                                         |
| 26 | Trinidad and Tobago        | 0 | 0    |                                                                                                                           |
| 27 | Tunisia                    | 1 | 165  | Tunisia World Health Survey 2003                                                                                          |
| 28 | Turkey                     | 4 | 213  | Turkey World Health Survey 2003                                                                                           |
| 29 |                            |   |      | Turkey National Research on Domestic Violence Against Women 2008                                                          |
| 30 |                            |   |      | Turkey National Research on Domestic Violence Against Women 2014                                                          |
| 31 |                            |   |      | Turkey Diagnosis-Related Group Hospital Inpatient Database 2011-2012                                                      |
| 32 | Turkmenistan               | 0 | 0    |                                                                                                                           |
| 33 | Tuvalu                     | 0 | 0    |                                                                                                                           |
| 34 |                            |   |      |                                                                                                                           |
| 35 |                            |   |      |                                                                                                                           |
| 36 |                            |   |      |                                                                                                                           |
| 37 |                            |   |      |                                                                                                                           |
| 38 |                            |   |      |                                                                                                                           |
| 39 |                            |   |      |                                                                                                                           |
| 40 |                            |   |      |                                                                                                                           |
| 41 |                            |   |      |                                                                                                                           |
| 42 |                            |   |      |                                                                                                                           |
| 43 |                            |   |      |                                                                                                                           |
| 44 |                            |   |      |                                                                                                                           |
| 45 |                            |   |      |                                                                                                                           |
| 46 |                            |   |      |                                                                                                                           |

|    |                             |    |       |                                                                                         |
|----|-----------------------------|----|-------|-----------------------------------------------------------------------------------------|
| 1  | Uganda                      | 3  | 39    | Uganda Child Verbal Autopsy Study 2007                                                  |
| 2  |                             |    |       | Uganda AIDS Indicator Survey 2011                                                       |
| 3  |                             |    |       | Uganda Demographic and Health Survey 2011                                               |
| 4  |                             |    |       |                                                                                         |
| 5  | Ukraine                     | 2  | 161   | Ukraine Demographic and Health Survey 2007                                              |
| 6  |                             |    |       | Ukraine World Health Survey 2002-2003                                                   |
| 7  |                             |    |       |                                                                                         |
| 8  | United Arab Emirates        | 1  | 135   | United Arab Emirates World Health Survey 2003                                           |
| 9  | United Kingdom              | 8  | 49268 | United Kingdom - England Hospital Episode Statistics 2003-2007                          |
| 10 |                             |    |       | United Kingdom - England Hospital Episode Statistics 2001-2002                          |
| 11 |                             |    |       | United Kingdom - England Hospital Episode Statistics 2008-2012                          |
| 12 |                             |    |       | United Kingdom - England Hospital Episode Statistics 2013-2014                          |
| 13 |                             |    |       | United Kingdom - England Adult Psychiatric Morbidity Survey 2006-2007 - UK Data Service |
| 14 |                             |    |       | United Kingdom - Scottish Crime and Justice Survey 2008-2009 - UK Data Service          |
| 15 |                             |    |       | United Kingdom - Scottish Crime and Justice Survey 2009-2010 - UK Data Service          |
| 16 |                             |    |       | United Kingdom - Scottish Crime and Justice Survey 2010-2011 - UK Data Service          |
| 17 |                             |    |       |                                                                                         |
| 18 |                             |    |       |                                                                                         |
| 19 |                             |    |       |                                                                                         |
| 20 | United Republic of Tanzania | 2  | 14    | Tanzania Demographic and Health Survey 2009-2010                                        |
| 21 |                             |    |       | Tanzania Demographic and Health Survey 2015-2016                                        |
| 22 | United States of America    | 44 | 81198 | United States National Hospital Ambulatory Medical Care Survey 1992                     |
| 23 |                             |    |       | United States National Hospital Ambulatory Medical Care Survey 2008                     |
| 24 |                             |    |       | United States National Hospital Ambulatory Medical Care Survey 2009                     |
| 25 |                             |    |       | United States National Hospital Ambulatory Medical Care Survey 2010                     |
| 26 |                             |    |       | United States National Hospital Ambulatory Medical Care Survey 1993                     |
| 27 |                             |    |       | United States National Hospital Ambulatory Medical Care Survey 1994                     |
| 28 |                             |    |       | United States National Hospital Ambulatory Medical Care Survey 1995                     |
| 29 |                             |    |       | United States National Hospital Ambulatory Medical Care Survey 1996                     |
| 30 |                             |    |       | United States National Hospital Ambulatory Medical Care Survey 1997                     |
| 31 |                             |    |       | United States National Hospital Ambulatory Medical Care Survey 1998                     |
| 32 |                             |    |       | United States National Hospital Ambulatory Medical Care Survey 1999                     |
| 33 |                             |    |       | United States National Hospital Ambulatory Medical Care Survey 2002                     |
| 34 |                             |    |       | United States National Hospital Ambulatory Medical Care Survey 2000                     |
| 35 |                             |    |       |                                                                                         |
| 36 |                             |    |       |                                                                                         |
| 37 |                             |    |       |                                                                                         |
| 38 |                             |    |       |                                                                                         |
| 39 |                             |    |       |                                                                                         |

40  
41  
42  
43  
44  
45  
46

|    |  |  |                                                                     |
|----|--|--|---------------------------------------------------------------------|
| 1  |  |  | United States National Hospital Ambulatory Medical Care Survey 2001 |
| 2  |  |  | United States National Hospital Ambulatory Medical Care Survey 2003 |
| 3  |  |  | United States National Hospital Ambulatory Medical Care Survey 2004 |
| 4  |  |  | United States National Hospital Ambulatory Medical Care Survey 2005 |
| 5  |  |  | United States National Hospital Ambulatory Medical Care Survey 2006 |
| 6  |  |  | United States National Hospital Ambulatory Medical Care Survey 2007 |
| 7  |  |  | United States National Health Interview Survey 2008                 |
| 8  |  |  | United States National Health Interview Survey 2009                 |
| 9  |  |  | United States National Hospital Ambulatory Medical Care Survey 2011 |
| 10 |  |  | United States National Health Interview Survey 2010                 |
| 11 |  |  | United States National Ambulatory Medical Care Survey 2012          |
| 12 |  |  | United States National Health Interview Survey 2011                 |
| 13 |  |  | United States National Hospital Discharge Survey 1988-1992          |
| 14 |  |  | United States National Hospital Discharge Survey 1993-1997          |
| 15 |  |  | United States National Hospital Discharge Survey 1998-2002          |
| 16 |  |  | United States National Hospital Discharge Survey 2003-2007          |
| 17 |  |  | United States National Hospital Discharge Survey 2008-2010          |
| 18 |  |  | United States National Hospital Ambulatory Medical Care Survey 2012 |
| 19 |  |  | United States National Ambulatory Medical Care Survey 2013          |
| 20 |  |  | United States National Hospital Ambulatory Medical Care Survey 2013 |
| 21 |  |  | United States State Inpatient Databases 2003-2007                   |
| 22 |  |  | United States State Inpatient Databases 2008-2009                   |
| 23 |  |  | United States National Hospital Ambulatory Medical Care Survey 2014 |
| 24 |  |  | United States Behavioral Risk Factor Surveillance System 2003       |
| 25 |  |  | United States Behavioral Risk Factor Surveillance System 2006       |
| 26 |  |  | United States Behavioral Risk Factor Surveillance System 2008       |
| 27 |  |  | United States Behavioral Risk Factor Surveillance System 2012       |
| 28 |  |  | United States Behavioral Risk Factor Surveillance System 2005       |
| 29 |  |  | United States Behavioral Risk Factor Surveillance System 2007       |
| 30 |  |  |                                                                     |
| 31 |  |  |                                                                     |
| 32 |  |  |                                                                     |
| 33 |  |  |                                                                     |
| 34 |  |  |                                                                     |
| 35 |  |  |                                                                     |
| 36 |  |  |                                                                     |
| 37 |  |  |                                                                     |
| 38 |  |  |                                                                     |
| 39 |  |  |                                                                     |

|    |                              |   |      |                                                                                                      |
|----|------------------------------|---|------|------------------------------------------------------------------------------------------------------|
| 1  |                              |   |      | United States National Epidemiologic Survey on Alcohol and Related Conditions 2004-2005              |
| 2  |                              |   |      | United States Gender, Alcohol and Culture: An International Study (GENACIS) 1995-1996                |
| 3  |                              |   |      |                                                                                                      |
| 4  | United States Virgin Islands | 4 | 99   | United States Behavioral Risk Factor Surveillance System 2003                                        |
| 5  |                              |   |      | United States Behavioral Risk Factor Surveillance System 2005                                        |
| 6  |                              |   |      | United States Behavioral Risk Factor Surveillance System 2006                                        |
| 7  |                              |   |      |                                                                                                      |
| 8  |                              |   |      | United States Behavioral Risk Factor Surveillance System 2008                                        |
| 9  | Uruguay                      | 1 | 155  | Uruguay World Health Survey 2002-2003                                                                |
| 10 | Uzbekistan                   | 0 | 0    |                                                                                                      |
| 11 |                              |   |      |                                                                                                      |
| 12 | Vanuatu                      | 0 | 0    |                                                                                                      |
| 13 | Venezuela (Bolivarian        |   |      |                                                                                                      |
| 14 | Republic of)                 | 0 | 0    |                                                                                                      |
| 15 |                              |   |      |                                                                                                      |
| 16 | Viet Nam                     | 7 | 1746 | Vietnam World Health Survey 2002-2003                                                                |
| 17 |                              |   |      | Injury and pre-hospital trauma care in Hanoi, Vietnam                                                |
| 18 |                              |   |      | Community-based assessment of unintentional injuries: a pilot study in rural Vietnam                 |
| 19 |                              |   |      |                                                                                                      |
| 20 |                              |   |      | Vietnam Hospital Data 2013                                                                           |
| 21 |                              |   |      | Vietnam Injury Survey 2010                                                                           |
| 22 |                              |   |      | Vietnam Multi-Center Injury Survey 2001                                                              |
| 23 |                              |   |      |                                                                                                      |
| 24 |                              |   |      | Suicide attempt in a rural area of Vietnam: Incidence, methods used and access to mental health care |
| 25 | Yemen                        | 0 | 0    |                                                                                                      |
| 26 | Zambia                       | 6 | 186  | Zambia Demographic and Health Survey 2001-2002                                                       |
| 27 |                              |   |      |                                                                                                      |
| 28 |                              |   |      | Zambia Demographic and Health Survey 2007                                                            |
| 29 |                              |   |      | Zambia World Health Survey 2003                                                                      |
| 30 |                              |   |      | Zambia Sexual Behavior Survey 2005                                                                   |
| 31 |                              |   |      |                                                                                                      |
| 32 |                              |   |      | Zambia Sexual Behavior Survey 2009                                                                   |
| 33 |                              |   |      |                                                                                                      |
| 34 | Zimbabwe                     | 4 | 193  | Zimbabwe World Health Survey 2003                                                                    |
| 35 |                              |   |      |                                                                                                      |
| 36 |                              |   |      | Zimbabwe Demographic and Health Survey 2005-2006                                                     |
| 37 |                              |   |      | Zimbabwe Demographic and Health Survey 2010-2011                                                     |
| 38 |                              |   |      |                                                                                                      |
| 39 |                              |   |      | Zimbabwe Demographic and Health Survey 2015                                                          |

**Table 2. Global Burden of Disease severity hierarchy for nature-of-injury**

| Rank | Inpatient hierarchy                                                                                                                         | Outpatient hierarchy                                                    |
|------|---------------------------------------------------------------------------------------------------------------------------------------------|-------------------------------------------------------------------------|
| 1    | Spinal cord lesion below neck level                                                                                                         | Fracture of pelvis                                                      |
| 2    | Amputation of lower limbs, bilateral                                                                                                        | Fracture of patella, tibia or fibula, or ankle                          |
| 3    | Amputation of upper limbs, bilateral                                                                                                        | Fracture of hip                                                         |
| 4    | Spinal cord lesion at neck level                                                                                                            | Fracture of skull                                                       |
| 5    | Fracture of hip                                                                                                                             | Amputation of thumb                                                     |
| 6    | Fracture of femur, other than femoral neck                                                                                                  | Fracture of vertebral column                                            |
| 7    | Amputation of upper limb, unilateral                                                                                                        | Multiple fractures, dislocations, crashes, wounds, sprains, and strains |
| 8    | Amputation of lower limb, unilateral                                                                                                        | Internal hemorrhage in abdomen and pelvis                               |
| 9    | Multiple fractures, dislocations, crashes, wounds, sprains, and strains                                                                     | Fracture of femur, other than femoral neck                              |
| 10   | Effect of different environmental factors                                                                                                   | Dislocation of hip                                                      |
| 11   | Fracture of patella, tibia or fibula, or ankle                                                                                              | Amputation of toe/toes                                                  |
| 12   | Moderate-Severe traumatic brain injury                                                                                                      | Fracture of hand (wrist and other distal part of hand)                  |
| 13   | Fracture of foot bones except ankle                                                                                                         | Amputation of fingers (excluding thumb)                                 |
| 14   | Internal hemorrhage in abdomen and pelvis                                                                                                   | Burns, <20% of total burned surface area without lower airway burns     |
| 15   | Crush injury                                                                                                                                | Dislocation of knee                                                     |
| 16   | Minor traumatic brain injury                                                                                                                | Contusion in any part of the body                                       |
| 17   | Fracture of pelvis                                                                                                                          | Minor traumatic brain injury                                            |
| 18   | Nerve injury                                                                                                                                | Foreign body in respiratory system                                      |
| 19   | Severe chest injury                                                                                                                         | Severe chest injury                                                     |
| 20   | Dislocation of hip                                                                                                                          | Drowning and nonfatal submersion                                        |
| 21   | Burns, $\geq 20\%$ total burned surface area or $\geq 10\%$ burned surface area if head/neck or hands/wrist involved w/o lower airway burns | Asphyxiation                                                            |
| 22   | Lower airway burns                                                                                                                          | Poisoning requiring urgent care                                         |
| 23   | Fracture of skull                                                                                                                           | Effect of different environmental factors                               |
| 24   | Amputation of thumb                                                                                                                         | Foreign body in GI and urogenital system                                |
| 25   | Fracture of hand (wrist and other distal part of hand)                                                                                      | Fracture of sternum and/or fracture of one or more ribs                 |
| 26   | Fracture of vertebral column                                                                                                                | Nerve injury                                                            |
| 27   | Contusion in any part of the body                                                                                                           | Fracture of face bones                                                  |
| 28   | Open wound(s)                                                                                                                               | Dislocation of shoulder                                                 |
| 29   | Amputation of toe/toes                                                                                                                      | Injury to eyes                                                          |
| 30   | Dislocation of knee                                                                                                                         | Fracture of clavicle, scapula, or humerus                               |
| 31   | Amputation of fingers (excluding thumb)                                                                                                     | Fracture of radius and/or ulna                                          |
| 32   | Drowning and nonfatal submersion                                                                                                            | Fracture of foot bones except ankle                                     |
| 33   | Asphyxiation                                                                                                                                | Foreign body in ear                                                     |



| Rank | Inpatient hierarchy                                                           | Outpatient hierarchy                                                          |
|------|-------------------------------------------------------------------------------|-------------------------------------------------------------------------------|
| 34   | Burns, <20% total burned surface area without lower airway burns              | Muscle and tendon injuries, including sprains and strains lesser dislocations |
| 35   | Muscle and tendon injuries, including sprains and strains lesser dislocations | Superficial injury of any part of the body                                    |
| 36   | Fracture of face bones                                                        | Open wound(s)                                                                 |
| 37   | Foreign body in respiratory system                                            | Complications following therapeutic procedures                                |
| 38   | Poisoning requiring urgent care                                               |                                                                               |
| 39   | Foreign body in GI and urogenital system                                      |                                                                               |
| 40   | Fracture of sternum and/or fracture of one or more ribs                       |                                                                               |
| 41   | Dislocation of shoulder                                                       |                                                                               |
| 42   | Injury to eyes                                                                |                                                                               |
| 43   | Fracture of clavicle, scapula, or humerus                                     |                                                                               |
| 44   | Fracture of radius and/or ulna                                                |                                                                               |
| 45   | Foreign body in ear                                                           |                                                                               |
| 46   | Superficial injury of any part of the body                                    |                                                                               |
| 47   | Complications following therapeutic procedures                                |                                                                               |

**Table 3. Global Burden of Disease lay descriptions and disability weights for health states**

| Health state                                                                        | Lay description                                                                                                                                                                                                                              | Disability weight      |
|-------------------------------------------------------------------------------------|----------------------------------------------------------------------------------------------------------------------------------------------------------------------------------------------------------------------------------------------|------------------------|
| Concussion                                                                          | has headaches, dizziness, nausea and difficulty concentrating.                                                                                                                                                                               | 0.110<br>(0.074–0.158) |
| Severe traumatic brain injury: short term, with or without treatment                | cannot concentrate and has headaches, memory problems, dizziness, and feels angry.                                                                                                                                                           | 0.214<br>(0.141–0.297) |
| Traumatic brain injury: long-term consequences, minor, with or without treatment    | has episodes of headaches, memory problems, and difficulty concentrating.                                                                                                                                                                    | 0.094<br>(0.063–0.133) |
| Traumatic brain injury: long-term consequences, moderate, with or without treatment | has frequent headaches, memory problems, difficulty concentrating, and dizziness. The person is often anxious and moody.                                                                                                                     | 0.231<br>(0.156–0.324) |
| Traumatic brain injury: long-term consequences, severe, with or without treatment   | cannot think clearly and has frequent headaches, memory problems, difficulty concentrating and dizziness. The person is often anxious and moody, and depends on others for feeding, toileting, dressing and walking.                         | 0.637<br>(0.462–0.789) |
| Spinal cord lesion below neck: treated                                              | is paralyzed from the waist down, cannot feel or move the legs and has difficulties with urine and bowel control. The person uses a wheelchair to move around.                                                                               | 0.296<br>(0.198–0.414) |
| Spinal cord lesion below neck: untreated                                            | is paralyzed from the waist down, cannot feel or move the legs and has difficulties with urine and bowel control. Legs are in fixed, bent positions, and the person gets frequent infections and pressure sores.                             | 0.623<br>(0.434–0.777) |
| Spinal cord lesion at neck: treated                                                 | is paralyzed from the neck down, with no feeling or control over any part of the body below the neck, and no urine or bowel control.                                                                                                         | 0.589<br>(0.415–0.748) |
| Spinal cord lesion at neck: untreated                                               | is paralyzed from the neck down, with no feeling or control over any part of the body below the neck, and no urine or bowel control. Arms and legs are in fixed, bent positions, and the person gets frequent infections and pressure sores. | 0.732<br>(0.544–0.871) |

**eTable 4. Global Burden of Disease (GBD) location hierarchy: 7 GBD super regions, 21 GBD regions, and 204 countries and territories**

| <b>GBD hierarchy</b> | <b>Location</b>           |
|----------------------|---------------------------|
| GBD super region     | High-income               |
| GBD region           | High-income North America |
|                      | Canada                    |
|                      | Greenland                 |
|                      | United States of America  |
| GBD region           | Australasia               |
|                      | Australia                 |
|                      | New Zealand               |
| GBD region           | High-income Asia Pacific  |
|                      | Brunei Darussalam         |
|                      | Japan                     |
|                      | Republic of Korea         |
|                      | Singapore                 |
| GBD region           | Western Europe            |
|                      | Andorra                   |
|                      | Austria                   |
|                      | Belgium                   |
|                      | Cyprus                    |
|                      | Denmark                   |
|                      | Finland                   |
|                      | France                    |
|                      | Germany                   |
|                      | Greece                    |
|                      | Iceland                   |
|                      | Ireland                   |
|                      | Israel                    |
|                      | Italy                     |
|                      | Luxembourg                |
|                      | Malta                     |
|                      | Monaco                    |
|                      | Netherlands               |
|                      | Norway                    |
|                      | Portugal                  |
|                      | San Marino                |
|                      | Spain                     |
|                      | Sweden                    |
|                      | Switzerland               |
|                      | United Kingdom            |
| GBD region           | Southern Latin America    |
|                      | Argentina                 |

| <b>GBD hierarchy</b> | <b>Location</b>                                  |
|----------------------|--------------------------------------------------|
|                      | Chile                                            |
|                      | Uruguay                                          |
| GBD super region     | Central Europe, Eastern Europe, and Central Asia |
| GBD region           | Eastern Europe                                   |
|                      | Belarus                                          |
|                      | Estonia                                          |
|                      | Latvia                                           |
|                      | Lithuania                                        |
|                      | Republic of Moldova                              |
|                      | Russian Federation                               |
|                      | Ukraine                                          |
| GBD region           | Central Europe                                   |
|                      | Albania                                          |
|                      | Bosnia and Herzegovina                           |
|                      | Bulgaria                                         |
|                      | Croatia                                          |
|                      | Czechia                                          |
|                      | Hungary                                          |
|                      | Montenegro                                       |
|                      | North Macedonia                                  |
|                      | Poland                                           |
|                      | Romania                                          |
|                      | Serbia                                           |
|                      | Slovakia                                         |
|                      | Slovenia                                         |
| GBD region           | Central Asia                                     |
|                      | Armenia                                          |
|                      | Azerbaijan                                       |
|                      | Georgia                                          |
|                      | Kazakhstan                                       |
|                      | Kyrgyzstan                                       |
|                      | Mongolia                                         |
|                      | Tajikistan                                       |
|                      | Turkmenistan                                     |
|                      | Uzbekistan                                       |
| GBD super region     | Latin America and Caribbean                      |
| GBD region           | Central Latin America                            |
|                      | Colombia                                         |
|                      | Costa Rica                                       |
|                      | El Salvador                                      |
|                      | Guatemala                                        |

| <b>GBD hierarchy</b> | <b>Location</b>                        |
|----------------------|----------------------------------------|
|                      | Honduras                               |
|                      | Mexico                                 |
|                      | Nicaragua                              |
|                      | Panama                                 |
|                      | Venezuela (Bolivarian Republic of)     |
| GBD region           | Andean Latin America                   |
|                      | Bolivia (Plurinational State of)       |
|                      | Ecuador                                |
|                      | Peru                                   |
| GBD region           | Caribbean                              |
|                      | Antigua and Barbuda                    |
|                      | Bahamas                                |
|                      | Barbados                               |
|                      | Belize                                 |
|                      | Bermuda                                |
|                      | Cuba                                   |
|                      | Dominica                               |
|                      | Dominican Republic                     |
|                      | Grenada                                |
|                      | Guyana                                 |
|                      | Haiti                                  |
|                      | Jamaica                                |
|                      | Puerto Rico                            |
|                      | Saint Lucia                            |
|                      | Saint Kitts and Nevis                  |
|                      | Saint Vincent and the Grenadines       |
|                      | Suriname                               |
|                      | Trinidad and Tobago                    |
|                      | United States Virgin Islands           |
| GBD region           | Tropical Latin America                 |
|                      | Brazil                                 |
|                      | Paraguay                               |
| GBD super region     | Southeast Asia, East Asia, and Oceania |
| GBD region           | East Asia                              |
|                      | China                                  |
|                      | Democratic People's Republic of Korea  |
|                      | Taiwan (Province of China)             |
| GBD region           | Southeast Asia                         |
|                      | Cambodia                               |
|                      | Indonesia                              |
|                      | Lao People's Democratic Republic       |
|                      | Malaysia                               |

| <b>GBD hierarchy</b> | <b>Location</b>                  |
|----------------------|----------------------------------|
|                      | Maldives                         |
|                      | Mauritius                        |
|                      | Myanmar                          |
|                      | Philippines                      |
|                      | Seychelles                       |
|                      | Sri Lanka                        |
|                      | Thailand                         |
|                      | Timor-Leste                      |
|                      | Viet Nam                         |
| GBD region           | Oceania                          |
|                      | American Samoa                   |
|                      | Cook Islands                     |
|                      | Fiji                             |
|                      | Guam                             |
|                      | Kiribati                         |
|                      | Marshall Islands                 |
|                      | Micronesia (Federated States of) |
|                      | Nauru                            |
|                      | Niue                             |
|                      | Northern Mariana Islands         |
|                      | Palau                            |
|                      | Papua New Guinea                 |
|                      | Samoa                            |
|                      | Solomon Islands                  |
|                      | Tokelau                          |
|                      | Tonga                            |
|                      | Vanuatu                          |
|                      | Tuvalu                           |
| GBD super region     | North Africa and Middle East     |
| GBD region           | North Africa and Middle East     |
|                      | Afghanistan                      |
|                      | Algeria                          |
|                      | Bahrain                          |
|                      | Egypt                            |
|                      | Iran (Islamic Republic of)       |
|                      | Iraq                             |
|                      | Jordan                           |
|                      | Kuwait                           |
|                      | Lebanon                          |
|                      | Libya                            |
|                      | Morocco                          |
|                      | Oman                             |

| <b>GBD hierarchy</b> | <b>Location</b>             |
|----------------------|-----------------------------|
|                      | Palestine                   |
|                      | Qatar                       |
|                      | Saudi Arabia                |
|                      | Sudan                       |
|                      | Syrian Arab Republic        |
|                      | Tunisia                     |
|                      | Turkey                      |
|                      | United Arab Emirates        |
|                      | Yemen                       |
| GBD super region     | South Asia                  |
| GBD region           | South Asia                  |
|                      | Bangladesh                  |
|                      | Bhutan                      |
|                      | India                       |
|                      | Nepal                       |
|                      | Pakistan                    |
| GBD super region     | Sub-Saharan Africa          |
| GBD region           | Southern Sub-Saharan Africa |
|                      | Botswana                    |
|                      | Eswatini                    |
|                      | Lesotho                     |
|                      | Namibia                     |
|                      | South Africa                |
|                      | Zimbabwe                    |
| GBD region           | Western Sub-Saharan Africa  |
|                      | Benin                       |
|                      | Burkina Faso                |
|                      | Cape Verde                  |
|                      | Cameroon                    |
|                      | Chad                        |
|                      | Côte d'Ivoire               |
|                      | Gambia                      |
|                      | Ghana                       |
|                      | Guinea                      |
|                      | Guinea-Bissau               |
|                      | Liberia                     |
|                      | Mali                        |
|                      | Mauritania                  |
|                      | Niger                       |
|                      | Nigeria                     |
|                      | Sao Tome and Principe       |
|                      | Senegal                     |

| <b>GBD hierarchy</b> | <b>Location</b>                  |
|----------------------|----------------------------------|
|                      | Sierra Leone                     |
|                      | Togo                             |
| GBD region           | Eastern Sub-Saharan Africa       |
|                      | Burundi                          |
|                      | Comoros                          |
|                      | Djibouti                         |
|                      | Eritrea                          |
|                      | Ethiopia                         |
|                      | Kenya                            |
|                      | Madagascar                       |
|                      | Malawi                           |
|                      | Mozambique                       |
|                      | Rwanda                           |
|                      | Somalia                          |
|                      | South Sudan                      |
|                      | Uganda                           |
|                      | United Republic of Tanzania      |
|                      | Zambia                           |
| GBD region           | Central Sub-Saharan Africa       |
|                      | Angola                           |
|                      | Central African Republic         |
|                      | Congo                            |
|                      | Democratic Republic of the Congo |
|                      | Equatorial Guinea                |
|                      | Gabon                            |



**eTable 5. Global Burden of Disease world population standard**

| Age group      | Percent of population | Rounded |
|----------------|-----------------------|---------|
| Early neonatal | 0.039706188           | 0.04    |
| Late neonatal  | 0.118021789           | 0.12    |
| Post neonatal  | 1.868264909           | 1.87    |
| <1             | 2.025992886           | 2.03    |
| 1 to 4         | 7.909875913           | 7.91    |
| 5 to 9         | 9.568418272           | 9.57    |
| 10 to 14       | 8.990277942           | 8.99    |
| 15 to 19       | 8.324362192           | 8.32    |
| 20 to 24       | 7.866450176           | 7.87    |
| 25 to 29       | 7.632917343           | 7.63    |
| 30 to 34       | 7.331511124           | 7.33    |
| 35 to 39       | 6.811055              | 6.81    |
| 40 to 44       | 6.136798184           | 6.14    |
| 45 to 49       | 5.509495973           | 5.51    |
| 50 to 54       | 4.921822565           | 4.92    |
| 55 to 59       | 4.345633072           | 4.35    |
| 60 to 64       | 3.684473754           | 3.68    |
| 65 to 69       | 2.991239718           | 2.99    |
| 70 to 74       | 2.272487547           | 2.27    |
| 75 to 79       | 1.607371655           | 1.61    |
| 80 to 84       | 1.113034599           | 1.11    |
| 85 to 89       | 0.61707008            | 0.62    |
| 90 to 94       | 0.255008068           | 0.26    |
| 95 plus        | 0.084703935           | 0.08    |

eTable 6. Global Burden of Disease (GBD) cause hierarchy with levels for injuries

| Cause                                                  | Level |
|--------------------------------------------------------|-------|
| Injuries                                               | 1     |
| Transport injuries                                     | 2     |
| Road injuries                                          | 3     |
| <b>Pedestrian road injuries</b>                        | 4     |
| <b>Cyclist road injuries</b>                           | 4     |
| <b>Motorcyclist road injuries</b>                      | 4     |
| <b>Motor vehicle road injuries</b>                     | 4     |
| <b>Other road injuries</b>                             | 4     |
| <b>Other transport injuries</b>                        | 3     |
| Unintentional injuries                                 | 2     |
| <b>Falls</b>                                           | 3     |
| <b>Drowning</b>                                        | 3     |
| <b>Fire, heat, and hot substances</b>                  | 3     |
| Poisonings                                             | 3     |
| <b>Poisoning by carbon monoxide</b>                    | 4     |
| <b>Poisoning by other means</b>                        | 4     |
| Exposure to mechanical forces                          | 3     |
| <b>Unintentional firearm injuries</b>                  | 4     |
| <b>Other exposure to mechanical forces</b>             | 4     |
| <b>Adverse effects of medical treatment</b>            | 3     |
| Animal contact                                         | 3     |
| <b>Venomous animal contact</b>                         | 4     |
| <b>Non-venomous animal contact</b>                     | 4     |
| Foreign body                                           | 3     |
| <b>Pulmonary aspiration and foreign body in airway</b> | 4     |
| <b>Foreign body in eyes</b>                            | 4     |
| <b>Foreign body in other body part</b>                 | 4     |
| <b>Environmental heat and cold exposure</b>            | 3     |
| <b>Exposure to forces of nature</b>                    | 3     |
| <b>Other unintentional injuries</b>                    | 3     |
| Self-harm and interpersonal violence                   | 2     |
| Self-harm                                              | 3     |
| <b>Self-harm by firearm</b>                            | 4     |
| <b>Self-harm by other specified means</b>              | 4     |
| Interpersonal violence                                 | 3     |
| <b>Physical violence by firearm</b>                    | 4     |
| <b>Physical violence by sharp object</b>               | 4     |
| <b>Physical violence by other means</b>                | 4     |
| <b>Conflict and terrorism</b>                          | 3     |
| <b>Executions and police conflict</b>                  | 3     |

The 29 causes in **bold** (they were called the most detailed causes in the GBD 2019 study) were analyzed in our study, which was consistent with the statistical analysis in the previous GBD 2016 study published in The Lancet Neurology.

**eTable 7. Global Burden of Disease locational ISO3 code and Socio-demographic Index (SDI), 2019**

| Location                         | ISO3 code | SDI   |
|----------------------------------|-----------|-------|
| Afghanistan                      | AFG       | 0.343 |
| Albania                          | ALB       | 0.681 |
| Algeria                          | DZA       | 0.652 |
| American Samoa                   | ASM       | 0.712 |
| Andorra                          | AND       | 0.894 |
| Angola                           | AGO       | 0.47  |
| Antigua and Barbuda              | ATG       | 0.743 |
| Argentina                        | ARG       | 0.708 |
| Armenia                          | ARM       | 0.689 |
| Australia                        | AUS       | 0.839 |
| Austria                          | AUT       | 0.849 |
| Azerbaijan                       | AZE       | 0.683 |
| Bahamas                          | BHS       | 0.796 |
| Bahrain                          | BHR       | 0.751 |
| Bangladesh                       | BGD       | 0.483 |
| Barbados                         | BRB       | 0.742 |
| Belarus                          | BLR       | 0.745 |
| Belgium                          | BEL       | 0.851 |
| Belize                           | BLZ       | 0.603 |
| Benin                            | BEN       | 0.352 |
| Bermuda                          | BMU       | 0.813 |
| Bhutan                           | BTN       | 0.455 |
| Bolivia (Plurinational State of) | BOL       | 0.566 |
| Bosnia and Herzegovina           | BIH       | 0.718 |
| Botswana                         | BWA       | 0.634 |
| Brazil                           | BRA       | 0.64  |
| Brunei Darussalam                | BRN       | 0.823 |
| Bulgaria                         | BGR       | 0.764 |
| Burkina Faso                     | BFA       | 0.257 |
| Burundi                          | BDI       | 0.284 |
| Cabo Verde                       | CPV       | 0.525 |
| Cambodia                         | KHM       | 0.469 |
| Cameroon                         | CMR       | 0.49  |
| Canada                           | CAN       | 0.873 |
| Central African Republic         | CAF       | 0.274 |
| Chad                             | TCD       | 0.238 |
| Chile                            | CHL       | 0.759 |
| China                            | CHN       | 0.686 |
| Colombia                         | COL       | 0.633 |
| Comoros                          | COM       | 0.455 |
| Congo                            | COG       | 0.568 |

| Location                              | ISO3 code | SDI   |
|---------------------------------------|-----------|-------|
| Cook Islands                          | COK       | 0.764 |
| Costa Rica                            | CRI       | 0.68  |
| Croatia                               | HRV       | 0.794 |
| Cuba                                  | CUB       | 0.668 |
| Cyprus                                | CYP       | 0.841 |
| Czechia                               | CZE       | 0.828 |
| Côte d'Ivoire                         | CIV       | 0.408 |
| Democratic People's Republic of Korea | PRK       | 0.558 |
| Democratic Republic of the Congo      | COD       | 0.382 |
| Denmark                               | DNK       | 0.89  |
| Djibouti                              | DJI       | 0.459 |
| Dominica                              | DMA       | 0.729 |
| Dominican Republic                    | DOM       | 0.592 |
| Ecuador                               | ECU       | 0.64  |
| Egypt                                 | EGY       | 0.658 |
| El Salvador                           | SLV       | 0.573 |
| Equatorial Guinea                     | GNQ       | 0.685 |
| Eritrea                               | ERI       | 0.396 |
| Estonia                               | EST       | 0.835 |
| Eswatini                              | SWZ       | 0.577 |
| Ethiopia                              | ETH       | 0.343 |
| Fiji                                  | FJI       | 0.664 |
| Finland                               | FIN       | 0.856 |
| France                                | FRA       | 0.834 |
| Gabon                                 | GAB       | 0.656 |
| Gambia                                | GMB       | 0.399 |
| Georgia                               | GEO       | 0.702 |
| Germany                               | DEU       | 0.898 |
| Ghana                                 | GHA       | 0.557 |
| Greece                                | GRC       | 0.794 |
| Greenland                             | GRL       | 0.761 |
| Grenada                               | GRD       | 0.669 |
| Guam                                  | GUM       | 0.813 |
| Guatemala                             | GTM       | 0.526 |
| Guinea                                | GIN       | 0.325 |
| Guinea-Bissau                         | GNB       | 0.355 |
| Guyana                                | GUY       | 0.618 |
| Haiti                                 | HTI       | 0.432 |
| Honduras                              | HND       | 0.496 |
| Hungary                               | HUN       | 0.791 |
| Iceland                               | ISL       | 0.869 |
| India                                 | IND       | 0.566 |

| <b>Location</b>                  | <b>ISO3 code</b> | <b>SDI</b> |
|----------------------------------|------------------|------------|
| Indonesia                        | IDN              | 0.66       |
| Iran (Islamic Republic of)       | IRN              | 0.67       |
| Iraq                             | IRQ              | 0.671      |
| Ireland                          | IRL              | 0.867      |
| Israel                           | ISR              | 0.803      |
| Italy                            | ITA              | 0.801      |
| Jamaica                          | JAM              | 0.684      |
| Japan                            | JPN              | 0.87       |
| Jordan                           | JOR              | 0.731      |
| Kazakhstan                       | KAZ              | 0.723      |
| Kenya                            | KEN              | 0.508      |
| Kiribati                         | KIR              | 0.527      |
| Kuwait                           | KWT              | 0.851      |
| Kyrgyzstan                       | KGZ              | 0.596      |
| Lao People's Democratic Republic | LAO              | 0.49       |
| Latvia                           | LVA              | 0.82       |
| Lebanon                          | LBN              | 0.708      |
| Lesotho                          | LSO              | 0.507      |
| Liberia                          | LBR              | 0.37       |
| Libya                            | LBY              | 0.709      |
| Lithuania                        | LTU              | 0.843      |
| Luxembourg                       | LUX              | 0.895      |
| Madagascar                       | MDG              | 0.396      |
| Malawi                           | MWI              | 0.384      |
| Malaysia                         | MYS              | 0.737      |
| Maldives                         | MDV              | 0.562      |
| Mali                             | MLI              | 0.263      |
| Malta                            | MLT              | 0.801      |
| Marshall Islands                 | MHL              | 0.544      |
| Mauritania                       | MRT              | 0.496      |
| Mauritius                        | MUS              | 0.705      |
| Mexico                           | MEX              | 0.649      |
| Micronesia (Federated States of) | FSM              | 0.58       |
| Monaco                           | MCO              | 0.902      |
| Mongolia                         | MNG              | 0.606      |
| Montenegro                       | MNE              | 0.791      |
| Morocco                          | MAR              | 0.548      |
| Mozambique                       | MOZ              | 0.307      |
| Myanmar                          | MMR              | 0.521      |
| Namibia                          | NAM              | 0.612      |
| Nauru                            | NRU              | 0.618      |
| Nepal                            | NPL              | 0.422      |

| <b>Location</b>                  | <b>ISO3 code</b> | <b>SDI</b> |
|----------------------------------|------------------|------------|
| Netherlands                      | NLD              | 0.883      |
| New Zealand                      | NZL              | 0.84       |
| Nicaragua                        | NIC              | 0.517      |
| Niger                            | NER              | 0.162      |
| Nigeria                          | NGA              | 0.515      |
| Niue                             | NIU              | 0.711      |
| North Macedonia                  | MKD              | 0.744      |
| Northern Mariana Islands         | MNP              | 0.771      |
| Norway                           | NOR              | 0.913      |
| Oman                             | OMN              | 0.783      |
| Pakistan                         | PAK              | 0.449      |
| Palau                            | PLW              | 0.738      |
| Palestine                        | PSE              | 0.588      |
| Panama                           | PAN              | 0.686      |
| Papua New Guinea                 | PNG              | 0.394      |
| Paraguay                         | PRY              | 0.638      |
| Peru                             | PER              | 0.648      |
| Philippines                      | PHL              | 0.623      |
| Poland                           | POL              | 0.802      |
| Portugal                         | PRT              | 0.743      |
| Puerto Rico                      | PRI              | 0.814      |
| Qatar                            | QAT              | 0.83       |
| Republic of Korea                | KOR              | 0.878      |
| Republic of Moldova              | MDA              | 0.696      |
| Romania                          | ROU              | 0.76       |
| Russian Federation               | RUS              | 0.805      |
| Rwanda                           | RWA              | 0.429      |
| Saint Kitts and Nevis            | KNA              | 0.746      |
| Saint Lucia                      | LCA              | 0.67       |
| Saint Vincent and the Grenadines | VCT              | 0.627      |
| Samoa                            | WSM              | 0.641      |
| San Marino                       | SMR              | 0.884      |
| Sao Tome and Principe            | STP              | 0.502      |
| Saudi Arabia                     | SAU              | 0.805      |
| Senegal                          | SEN              | 0.389      |
| Serbia                           | SRB              | 0.767      |
| Seychelles                       | SYC              | 0.724      |
| Sierra Leone                     | SLE              | 0.347      |
| Singapore                        | SGP              | 0.861      |
| Slovakia                         | SVK              | 0.812      |
| Slovenia                         | SVN              | 0.84       |
| Solomon Islands                  | SLB              | 0.407      |

| <b>Location</b>                    | <b>ISO3 code</b> | <b>SDI</b> |
|------------------------------------|------------------|------------|
| Somalia                            | SOM              | 0.081      |
| South Africa                       | ZAF              | 0.678      |
| South Sudan                        | SSD              | 0.363      |
| Spain                              | ESP              | 0.767      |
| Sri Lanka                          | LKA              | 0.69       |
| Sudan                              | SDN              | 0.515      |
| Suriname                           | SUR              | 0.636      |
| Sweden                             | SWE              | 0.872      |
| Switzerland                        | CHE              | 0.929      |
| Syrian Arab Republic               | SYR              | 0.619      |
| Taiwan (Province of China)         | TWN              | 0.868      |
| Tajikistan                         | TJK              | 0.539      |
| Thailand                           | THA              | 0.687      |
| Timor-Leste                        | TLS              | 0.514      |
| Togo                               | TGO              | 0.417      |
| Tokelau                            | TKL              | 0.626      |
| Tonga                              | TON              | 0.636      |
| Trinidad and Tobago                | TTO              | 0.757      |
| Tunisia                            | TUN              | 0.672      |
| Turkey                             | TUR              | 0.748      |
| Turkmenistan                       | TKM              | 0.67       |
| Tuvalu                             | TUV              | 0.589      |
| Uganda                             | UGA              | 0.404      |
| Ukraine                            | UKR              | 0.736      |
| United Arab Emirates               | ARE              | 0.88       |
| United Kingdom                     | GBR              | 0.847      |
| United Republic of Tanzania        | TZA              | 0.423      |
| United States of America           | USA              | 0.859      |
| United States Virgin Islands       | VIR              | 0.799      |
| Uruguay                            | URY              | 0.697      |
| Uzbekistan                         | UZB              | 0.631      |
| Vanuatu                            | VUT              | 0.485      |
| Venezuela (Bolivarian Republic of) | VEN              | 0.607      |
| Viet Nam                           | VNM              | 0.617      |
| Yemen                              | YEM              | 0.412      |
| Zambia                             | ZMB              | 0.505      |
| Zimbabwe                           | ZWE              | 0.476      |

Table 8. Incidence of traumatic brain injury in 1990 and 2019, and percentage changes of age-standardized rates by location, 1990–2019

| Location                         | Incidence                    |                                 |                                                |                  |                                                         |
|----------------------------------|------------------------------|---------------------------------|------------------------------------------------|------------------|---------------------------------------------------------|
|                                  | Numbers<br>(95% UI)          |                                 | Age-standardized rates per 100,000<br>(95% UI) |                  | Percentage change of age-standardized rates<br>(95% UI) |
|                                  | (Year 1990)                  | (Year 2019)                     | (Year 1990)                                    | (Year 2019)      | (Year 1990–Year 2019)                                   |
|                                  | <b>Global</b>                | 18853869 (16215389 to 21806108) | 27160708 (23357251 to 31415052)                | 366 (317 to 421) | 346 (298 to 401)                                        |
| <b>High-income</b>               | 4048422 (3493149 to 4776726) | 4749065 (4069211 to 5570829)    | 431 (369 to 515)                               | 385 (327 to 466) | -10.6% (-12.9% to -8.2%)                                |
| <b>High-income North America</b> | 1120251 (915712 to 1386641)  | 1343020 (1130550 to 1633382)    | 392 (318 to 491)                               | 339 (280 to 416) | -13.7% (-17.1% to -10.0%)                               |
| Canada                           | 126742 (112173 to 143701)    | 208010 (181031 to 239428)       | 441 (390 to 501)                               | 435 (381 to 500) | -1.4% (-5.7% to 2.8%)                                   |
| Greenland                        | 260 (205 to 339)             | 191 (152 to 242)                | 463 (367 to 600)                               | 332 (264 to 426) | -28.4% (-31.8% to -25.4%)                               |
| United States of America         | 993223 (800533 to 1253794)   | 1134798 (933708 to 1399550)     | 388 (310 to 492)                               | 327 (266 to 406) | -15.7% (-19.3% to -11.8%)                               |
| <b>Australasia</b>               | 143293 (121566 to 172676)    | 227584 (194914 to 270506)       | 710 (596 to 863)                               | 729 (613 to 889) | 2.6% (-0.9% to 6.0%)                                    |
| Australia                        | 115278 (97486 to 138505)     | 188496 (161519 to 224241)       | 689 (577 to 838)                               | 712 (595 to 871) | 3.3% (-0.6% to 7.2%)                                    |
| New Zealand                      | 28015 (23858 to 33989)       | 39088 (33612 to 46185)          | 812 (689 to 985)                               | 820 (697 to 985) | 0.9% (-3.7% to 5.9%)                                    |
| <b>High-income Asia Pacific</b>  | 682610 (576222 to 818678)    | 684210 (585181 to 807782)       | 386 (326 to 468)                               | 337 (282 to 414) | -12.8% (-15.8% to -9.6%)                                |
| Brunei Darussalam                | 1159 (995 to 1359)           | 1717 (1474 to 2014)             | 462 (404 to 535)                               | 399 (346 to 466) | -13.5% (-16.8% to -10.4%)                               |
| Japan                            | 439516 (362898 to 539700)    | 401396 (337356 to 483481)       | 344 (282 to 430)                               | 294 (238 to 374) | -14.6% (-17.6% to -11.6%)                               |



1  
2  
3  
4  
5  
6  
7  
8  
9  
10  
11  
12  
13  
14  
15  
16  
17  
18  
19  
20  
21  
22  
23  
24  
25  
26  
27  
28  
29  
30  
31  
32  
33  
34  
35  
36  
37  
38  
39  
40  
41  
42  
43  
44  
45  
46

| Location              | Incidence                    |                              |                                                |                  |                                                         |
|-----------------------|------------------------------|------------------------------|------------------------------------------------|------------------|---------------------------------------------------------|
|                       | Numbers<br>(95% UI)          |                              | Age-standardized rates per 100,000<br>(95% UI) |                  | Percentage change of age-standardized rates<br>(95% UI) |
|                       | (Year 1990)                  | (Year 2019)                  | (Year 1990)                                    | (Year 2019)      | (Year 1990–Year 2019)                                   |
| Republic of Korea     | 229572 (198367 to 266154)    | 261650 (229995 to 301800)    | 510 (445 to 589)                               | 447 (385 to 523) | -12.4% (-17% to -7.5%)                                  |
| Singapore             | 12363 (10572 to 14673)       | 19447 (16786 to 22882)       | 386 (332 to 456)                               | 348 (297 to 415) | -9.7% (-13.1% to -6.0%)                                 |
| <b>Western Europe</b> | 1900129 (1658576 to 2211597) | 2211884 (1887690 to 2613432) | 459 (398 to 536)                               | 413 (352 to 494) | -10.0% (-13.2% to -6.4%)                                |
| Andorra               | 257 (222 to 300)             | 483 (413 to 572)             | 494 (426 to 577)                               | 497 (426 to 591) | 0.7% (-2.7% to 4.2%)                                    |
| Austria               | 45930 (39911 to 53565)       | 49798 (42570 to 58889)       | 538 (464 to 632)                               | 459 (390 to 544) | -14.6% (-18.6% to -10.2%)                               |
| Belgium               | 54836 (47715 to 63954)       | 79891 (68166 to 95248)       | 512 (441 to 601)                               | 545 (461 to 653) | 6.5% (1.7% to 11.3%)                                    |
| Cyprus                | 3322 (2878 to 3882)          | 5975 (5132 to 7037)          | 437 (379 to 512)                               | 440 (374 to 527) | 0.7% (-3.9% to 5.3%)                                    |
| Denmark               | 31336 (27114 to 36415)       | 27541 (23501 to 32541)       | 512 (443 to 598)                               | 410 (345 to 495) | -19.9% (-24.8% to -14.9%)                               |
| Finland               | 35307 (30443 to 41573)       | 40725 (34945 to 47999)       | 662 (569 to 785)                               | 599 (502 to 730) | -9.5% (-13.4% to -5.3%)                                 |
| France                | 355104 (309249 to 412705)    | 437805 (371350 to 520101)    | 552 (479 to 648)                               | 500 (426 to 599) | -9.4% (-13.6% to -5.2%)                                 |
| Germany               | 387145 (335603 to 449564)    | 459776 (391023 to 540848)    | 447 (386 to 524)                               | 425 (361 to 507) | -5.1% (-9.5% to -0.3%)                                  |
| Greece                | 46034 (40112 to 53668)       | 40552 (35287 to 46979)       | 436 (374 to 510)                               | 378 (321 to 452) | -13.1% (-17.3% to -9.2%)                                |
| Iceland               | 1120 (971 to 1320)           | 1547 (1322 to 1823)          | 429 (370 to 506)                               | 410 (347 to 493) | -4.4% (-8.5% to -0.5%)                                  |

1  
2  
3  
4  
5  
6  
7  
8  
9  
10  
11  
12  
13  
14  
15  
16  
17  
18  
19  
20  
21  
22  
23  
24  
25  
26  
27  
28  
29  
30  
31  
32  
33  
34  
35  
36  
37  
38  
39  
40  
41  
42  
43  
44  
45  
46

| Location       | Incidence                 |                           |                                                |                  |                                                         |
|----------------|---------------------------|---------------------------|------------------------------------------------|------------------|---------------------------------------------------------|
|                | Numbers<br>(95% UI)       |                           | Age-standardized rates per 100,000<br>(95% UI) |                  | Percentage change of age-standardized rates<br>(95% UI) |
|                | (Year 1990)               | (Year 2019)               | (Year 1990)                                    | (Year 2019)      | (Year 1990–Year 2019)                                   |
| Ireland        | 15276 (13121 to 17950)    | 20279 (17258 to 24025)    | 420 (360 to 493)                               | 399 (336 to 479) | -5.0% (-9.9% to -0.1%)                                  |
| Israel         | 19147 (16486 to 22607)    | 34415 (29353 to 40786)    | 383 (331 to 452)                               | 363 (309 to 432) | -5.3% (-10.8% to 0.5%)                                  |
| Italy          | 311925 (264451 to 373554) | 293426 (244319 to 355929) | 490 (418 to 581)                               | 377 (319 to 451) | -23.1% (-26.1% to -20.0%)                               |
| Luxembourg     | 2190 (1907 to 2530)       | 3303 (2824 to 3882)       | 545 (471 to 634)                               | 471 (403 to 560) | -13.5% (-18.3% to -9.0%)                                |
| Malta          | 1559 (1335 to 1841)       | 2163 (1841 to 2568)       | 426 (363 to 507)                               | 448 (374 to 543) | 5.1% (1.2% to 9.0%)                                     |
| Monaco         | 78 (63 to 98)             | 99 (79 to 125)            | 275 (215 to 350)                               | 286 (221 to 372) | 4.1% (-0.2% to 8.5%)                                    |
| Netherlands    | 59151 (51424 to 68439)    | 96639 (82271 to 114651)   | 374 (324 to 432)                               | 418 (358 to 495) | 11.8% (6.9% to 16.8%)                                   |
| Norway         | 15876 (12909 to 19920)    | 17945 (14487 to 22608)    | 350 (279 to 445)                               | 305 (239 to 394) | -12.9% (-16.7% to -8.7%)                                |
| Portugal       | 43355 (38038 to 49550)    | 36993 (32073 to 43127)    | 418 (364 to 480)                               | 291 (251 to 340) | -30.4% (-34.4% to -26.4%)                               |
| San Marino     | 71 (56 to 91)             | 95 (75 to 122)            | 305 (239 to 389)                               | 296 (228 to 386) | -2.9% (-8.0% to 2.3%)                                   |
| Spain          | 170769 (149645 to 196464) | 193591 (166251 to 227169) | 427 (372 to 498)                               | 378 (320 to 451) | -11.6% (-17.8% to -4.6%)                                |
| Sweden         | 27855 (22159 to 35604)    | 31091 (24594 to 39906)    | 322 (250 to 420)                               | 290 (223 to 384) | -9.8% (-13.6% to -5.4%)                                 |
| Switzerland    | 52629 (45812 to 61541)    | 59413 (50433 to 70834)    | 675 (583 to 792)                               | 537 (453 to 647) | -20.5% (-24.3% to -16.6%)                               |
| United Kingdom | 218280 (187260 to 257578) | 276411 (233936 to 329374) | 369 (314 to 437)                               | 364 (306 to 440) | -1.4% (-5.3% to 2.1%)                                   |

1  
2  
3  
4  
5  
6  
7  
8  
9  
10  
11  
12  
13  
14  
15  
16  
17  
18  
19  
20  
21  
22  
23  
24  
25  
26  
27  
28  
29  
30  
31  
32  
33  
34  
35  
36  
37  
38  
39  
40  
41  
42  
43  
44  
45  
46

| Location                                                | Incidence                    |                              |                                                |                  |                                                         |
|---------------------------------------------------------|------------------------------|------------------------------|------------------------------------------------|------------------|---------------------------------------------------------|
|                                                         | Numbers<br>(95% UI)          |                              | Age-standardized rates per 100,000<br>(95% UI) |                  | Percentage change of age-standardized rates<br>(95% UI) |
|                                                         | (Year 1990)                  | (Year 2019)                  | (Year 1990)                                    | (Year 2019)      | (Year 1990–Year 2019)                                   |
| <b>Southern Latin America</b>                           | 202139 (174596 to 238831)    | 282368 (245426 to 331894)    | 409 (354 to 481)                               | 420 (363 to 497) | 2.9% (0.0% to 5.8%)                                     |
| Argentina                                               | 133041 (114953 to 157207)    | 185347 (160190 to 218721)    | 404 (350 to 476)                               | 410 (352 to 486) | 1.3% (-2.2% to 4.9%)                                    |
| Chile                                                   | 53588 (46283 to 63533)       | 80432 (70305 to 93851)       | 403 (351 to 474)                               | 435 (376 to 515) | 7.9% (4.3% to 11.9%)                                    |
| Uruguay                                                 | 15502 (13094 to 18725)       | 16575 (14375 to 19433)       | 494 (416 to 601)                               | 471 (405 to 557) | -4.7% (-10.7% to 1.2%)                                  |
| <b>Central Europe, Eastern Europe, and Central Asia</b> | 3448923 (2993981 to 3970637) | 2810851 (2441242 to 3232848) | 814 (706 to 941)                               | 652 (562 to 756) | -20.0% (-21.6% to -18.3%)                               |
| <b>Eastern Europe</b>                                   | 2111822 (1829230 to 2431948) | 1596337 (1380438 to 1851604) | 913 (788 to 1057)                              | 737 (633 to 857) | -19.3% (-20.9% to -17.5%)                               |
| Belarus                                                 | 82407 (72591 to 94495)       | 68634 (60179 to 79328)       | 776 (681 to 890)                               | 691 (601 to 800) | -10.9% (-16.4% to -5.6%)                                |
| Estonia                                                 | 15139 (13274 to 17122)       | 7956 (6969 to 9194)          | 946 (827 to 1070)                              | 593 (515 to 689) | -37.3% (-41.3% to -33.3%)                               |
| Latvia                                                  | 28612 (25205 to 32672)       | 12779 (11230 to 14679)       | 1040 (913 to 1188)                             | 637 (556 to 735) | -38.7% (-42.4% to -34.9%)                               |
| Lithuania                                               | 36467 (32025 to 41606)       | 21385 (18860 to 24407)       | 958 (840 to 1095)                              | 696 (610 to 803) | -27.3% (-31.4% to -23.4%)                               |
| Republic of Moldova                                     | 33134 (29064 to 37940)       | 20142 (17703 to 22874)       | 740 (650 to 845)                               | 535 (467 to 613) | -27.6% (-31.4% to -23.6%)                               |
| Russian Federation                                      | 1460908 (1259645 to 1686720) | 1147613 (987359 to 1334447)  | 946 (812 to 1102)                              | 755 (648 to 882) | -20.3% (-22.5% to -17.9%)                               |

1  
2  
3  
4  
5  
6  
7  
8  
9  
10  
11  
12  
13  
14  
15  
16  
17  
18  
19  
20  
21  
22  
23  
24  
25  
26  
27  
28  
29  
30  
31  
32  
33  
34  
35  
36  
37  
38  
39  
40  
41  
42  
43  
44  
45  
46

| Location               | Incidence                   |                           |                                                |                  |                                                         |
|------------------------|-----------------------------|---------------------------|------------------------------------------------|------------------|---------------------------------------------------------|
|                        | Numbers<br>(95% UI)         |                           | Age-standardized rates per 100,000<br>(95% UI) |                  | Percentage change of age-standardized rates<br>(95% UI) |
|                        | (Year 1990)                 | (Year 2019)               | (Year 1990)                                    | (Year 2019)      | (Year 1990–Year 2019)                                   |
| Ukraine                | 455155 (390046 to 532796)   | 317828 (274671 to 370646) | 850 (726 to 999)                               | 721 (619 to 844) | -15.2% (-17.5% to -12.9%)                               |
| Central Europe         | 1050449 (918891 to 1208699) | 860390 (750474 to 986981) | 846 (738 to 979)                               | 729 (631 to 857) | -13.8% (-16.4% to -11.0%)                               |
| Albania                | 24290 (20268 to 29847)      | 17546 (15114 to 20694)    | 707 (593 to 860)                               | 661 (566 to 787) | -6.5% (-12.7% to -0.1%)                                 |
| Bosnia and Herzegovina | 31248 (26595 to 36809)      | 21054 (18270 to 24541)    | 680 (578 to 801)                               | 664 (567 to 787) | -2.3% (-11.0% to 3.9%)                                  |
| Bulgaria               | 67563 (59061 to 77434)      | 45758 (39781 to 53064)    | 799 (691 to 924)                               | 712 (611 to 836) | -10.8% (-15.5% to -6.8%)                                |
| Croatia                | 45918 (40136 to 52198)      | 42676 (37073 to 49095)    | 920 (800 to 1049)                              | 840 (733 to 973) | -8.7% (-14.3% to -3.1%)                                 |
| Czechia                | 108400 (95345 to 123811)    | 89409 (78044 to 102472)   | 998 (873 to 1148)                              | 800 (691 to 935) | -19.9% (-23.8% to -15.7%)                               |
| Hungary                | 107982 (94821 to 123481)    | 76538 (66601 to 87694)    | 964 (847 to 1105)                              | 721 (622 to 848) | -25.3% (-29.3% to -20.8%)                               |
| Montenegro             | 4648 (4046 to 5422)         | 4534 (3961 to 5250)       | 736 (640 to 859)                               | 727 (628 to 855) | -1.2% (-4.0% to 2.0%)                                   |
| North Macedonia        | 12604 (10778 to 14886)      | 13508 (11694 to 15736)    | 619 (530 to 732)                               | 644 (551 to 760) | 4.0% (-2.9% to 10.2%)                                   |
| Poland                 | 326391 (281406 to 381390)   | 300905 (260824 to 348188) | 847 (730 to 995)                               | 746 (639 to 876) | -11.9% (-14.9% to -8.8%)                                |
| Romania                | 187639 (163095 to 217914)   | 125140 (109393 to 144911) | 798 (690 to 928)                               | 662 (567 to 782) | -17.1% (-20.8% to -13.0%)                               |

1  
2  
3  
4  
5  
6  
7  
8  
9  
10  
11  
12  
13  
14  
15  
16  
17  
18  
19  
20  
21  
22  
23  
24  
25  
26  
27  
28  
29  
30  
31  
32  
33  
34  
35  
36  
37  
38  
39  
40  
41  
42  
43  
44  
45  
46

| Location            | Incidence                 |                           |                                                |                   |                                                         |
|---------------------|---------------------------|---------------------------|------------------------------------------------|-------------------|---------------------------------------------------------|
|                     | Numbers<br>(95% UI)       |                           | Age-standardized rates per 100,000<br>(95% UI) |                   | Percentage change of age-standardized rates<br>(95% UI) |
|                     | (Year 1990)               | (Year 2019)               | (Year 1990)                                    | (Year 2019)       | (Year 1990–Year 2019)                                   |
| Serbia              | 63400 (54940 to 73105)    | 56442 (49158 to 65675)    | 685 (589 to 796)                               | 651 (556 to 771)  | -5.0% (-10.0% to 0.8%)                                  |
| Slovakia            | 48267 (42123 to 55944)    | 45752 (39889 to 52835)    | 899 (782 to 1043)                              | 802 (694 to 936)  | -10.8% (-14.7% to -6.8%)                                |
| Slovenia            | 22098 (19335 to 25416)    | 21129 (18353 to 24397)    | 1079 (935 to 1251)                             | 885 (768 to 1036) | -18% (-22.1% to -13.8%)                                 |
| <b>Central Asia</b> | 286651 (249571 to 332136) | 354124 (307249 to 410664) | 410 (358 to 472)                               | 374 (325 to 433)  | -8.7% (-11.1% to -6.5%)                                 |
| Armenia             | 16547 (14288 to 19180)    | 10102 (8759 to 11727)     | 479 (416 to 554)                               | 342 (295 to 401)  | -28.6% (-32.0% to -25.0%)                               |
| Azerbaijan          | 27908 (24115 to 32533)    | 33547 (28879 to 39351)    | 367 (318 to 424)                               | 323 (278 to 379)  | -12.0% (-16.2% to -7.2%)                                |
| Georgia             | 26165 (22663 to 30364)    | 18034 (15773 to 20821)    | 473 (409 to 549)                               | 502 (433 to 585)  | 6.1% (1.9% to 10.7%)                                    |
| Kazakhstan          | 80723 (70244 to 93033)    | 85299 (74100 to 98232)    | 483 (421 to 555)                               | 461 (400 to 530)  | -4.5% (-8.6% to -0.8%)                                  |
| Kyrgyzstan          | 19195 (16570 to 22255)    | 22763 (19622 to 26463)    | 432 (375 to 498)                               | 343 (297 to 398)  | -20.5% (-24.3% to -16.5%)                               |
| Mongolia            | 8232 (7097 to 9614)       | 15601 (13536 to 18142)    | 383 (334 to 443)                               | 451 (393 to 526)  | 17.8% (13.9% to 21.9%)                                  |
| Tajikistan          | 20222 (17355 to 23810)    | 29009 (24797 to 34252)    | 381 (331 to 442)                               | 298 (258 to 350)  | -21.7% (-24.8% to -18.6%)                               |
| Turkmenistan        | 12629 (10913 to 14680)    | 16375 (14087 to 19322)    | 333 (290 to 384)                               | 316 (272 to 373)  | -5.1% (-9.9% to -0.2%)                                  |

1  
2  
3  
4  
5  
6  
7  
8  
9  
10  
11  
12  
13  
14  
15  
16  
17  
18  
19  
20  
21  
22  
23  
24  
25  
26  
27  
28  
29  
30  
31  
32  
33  
34  
35  
36  
37  
38  
39  
40  
41  
42  
43  
44  
45  
46

| Location                           | Incidence                    |                              |                                                |                  |                                                         |
|------------------------------------|------------------------------|------------------------------|------------------------------------------------|------------------|---------------------------------------------------------|
|                                    | Numbers<br>(95% UI)          |                              | Age-standardized rates per 100,000<br>(95% UI) |                  | Percentage change of age-standardized rates<br>(95% UI) |
|                                    | (Year 1990)                  | (Year 2019)                  | (Year 1990)                                    | (Year 2019)      | (Year 1990–Year 2019)                                   |
| Uzbekistan                         | 75031 (64631 to 87357)       | 123394 (106270 to 143651)    | 354 (308 to 408)                               | 358 (311 to 415) | 1.3% (-2.8% to 4.8%)                                    |
| <b>Latin America and Caribbean</b> | 1224624 (1025961 to 1471278) | 1601404 (1357254 to 1904769) | 311 (264 to 370)                               | 273 (231 to 324) | -12.4% (-16.0% to -9.8%)                                |
| <b>Central Latin America</b>       | 614132 (514302 to 738706)    | 765677 (649993 to 907182)    | 369 (315 to 437)                               | 306 (260 to 363) | -17.2% (-21.4% to -14.1%)                               |
| Colombia                           | 157598 (136622 to 190358)    | 162401 (141821 to 184268)    | 481 (423 to 569)                               | 341 (297 to 389) | -29.1% (-38.2% to -23.2%)                               |
| Costa Rica                         | 10257 (8870 to 11945)        | 16510 (14473 to 18827)       | 351 (307 to 401)                               | 352 (306 to 402) | 0.4% (-3.6% to 4.0%)                                    |
| El Salvador                        | 26398 (20821 to 37523)       | 23137 (20203 to 26687)       | 483 (390 to 668)                               | 366 (321 to 422) | -24.1% (-44.4% to -8.2%)                                |
| Guatemala                          | 30702 (24868 to 40208)       | 59797 (51515 to 70653)       | 383 (318 to 486)                               | 340 (296 to 396) | -11.3% (-30.7% to 1.4%)                                 |
| Honduras                           | 15003 (12781 to 17528)       | 31620 (27148 to 36947)       | 306 (267 to 351)                               | 321 (279 to 372) | 4.7% (-0.1% to 9.8%)                                    |
| Mexico                             | 279371 (219058 to 358076)    | 339717 (272861 to 424935)    | 320 (257 to 404)                               | 271 (219 to 339) | -15.4% (-17.4% to -13.1%)                               |
| Nicaragua                          | 11712 (9996 to 13780)        | 17213 (14760 to 20240)       | 289 (251 to 331)                               | 269 (233 to 313) | -6.9% (-12% to -2.4%)                                   |
| Panama                             | 7790 (6726 to 8947)          | 12749 (11095 to 14736)       | 325 (285 to 371)                               | 306 (266 to 354) | -5.9% (-10.2% to -1.9%)                                 |
| Venezuela (Bolivarian Republic of) | 75302 (64723 to 87960)       | 102532 (89076 to 118625)     | 394 (343 to 452)                               | 371 (321 to 430) | -6.0% (-11.2% to -0.8%)                                 |
| <b>Andean Latin America</b>        | 103322 (87106 to 127542)     | 154311 (135039 to 178003)    | 268 (229 to 325)                               | 243 (213 to 279) | -9.5% (-23.6% to 0.1%)                                  |

1  
2  
3  
4  
5  
6  
7  
8  
9  
10  
11  
12  
13  
14  
15  
16  
17  
18  
19  
20  
21  
22  
23  
24  
25  
26  
27  
28  
29  
30  
31  
32  
33  
34  
35  
36  
37  
38  
39  
40  
41  
42  
43  
44  
45  
46

| Location                         | Incidence                |                           |                                                |                  |                                                         |
|----------------------------------|--------------------------|---------------------------|------------------------------------------------|------------------|---------------------------------------------------------|
|                                  | Numbers<br>(95% UI)      |                           | Age-standardized rates per 100,000<br>(95% UI) |                  | Percentage change of age-standardized rates<br>(95% UI) |
|                                  | (Year 1990)              | (Year 2019)               | (Year 1990)                                    | (Year 2019)      | (Year 1990–Year 2019)                                   |
| Bolivia (Plurinational State of) | 14398 (12480 to 16778)   | 26248 (22834 to 30390)    | 229 (201 to 263)                               | 224 (196 to 257) | -2.2% (-6.1% to 1.7%)                                   |
| Ecuador                          | 25018 (21761 to 28749)   | 49398 (43363 to 56599)    | 255 (224 to 289)                               | 282 (248 to 322) | 10.8% (7.0% to 14.7%)                                   |
| Peru                             | 63906 (51592 to 85784)   | 78666 (68391 to 91205)    | 286 (235 to 378)                               | 230 (201 to 267) | -19.5% (-38.6% to -5.3%)                                |
| <b>Caribbean</b>                 | 104915 (91947 to 119513) | 155545 (137052 to 177959) | 299 (263 to 338)                               | 325 (286 to 373) | 8.5% (4.6% to 12.2%)                                    |
| Antigua and Barbuda              | 168 (143 to 201)         | 250 (216 to 296)          | 268 (229 to 319)                               | 287 (246 to 341) | 7.1% (2.8% to 11.5%)                                    |
| Bahamas                          | 725 (625 to 828)         | 1087 (951 to 1240)        | 277 (241 to 313)                               | 289 (253 to 330) | 4.4% (-0.7% to 9.4%)                                    |
| Barbados                         | 641 (557 to 737)         | 749 (659 to 853)          | 244 (211 to 280)                               | 255 (222 to 295) | 4.8% (-0.3% to 9.4%)                                    |
| Belize                           | 554 (471 to 658)         | 1314 (1132 to 1524)       | 286 (246 to 331)                               | 314 (273 to 362) | 9.8% (0.0% to 17.5%)                                    |
| Bermuda                          | 150 (121 to 184)         | 140 (114 to 174)          | 250 (201 to 308)                               | 243 (193 to 311) | -2.8% (-9.4% to 5.2%)                                   |
| Cuba                             | 41259 (36610 to 46402)   | 54214 (47783 to 62107)    | 372 (331 to 417)                               | 407 (357 to 465) | 9.5% (3.0% to 16.6%)                                    |
| Dominica                         | 186 (162 to 213)         | 182 (160 to 208)          | 247 (216 to 281)                               | 264 (230 to 303) | 6.8% (2.6% to 10.9%)                                    |
| Dominican Republic               | 18517 (15908 to 21389)   | 36823 (31858 to 42425)    | 253 (220 to 288)                               | 334 (290 to 382) | 32.2% (26.3% to 38%)                                    |
| Grenada                          | 217 (188 to 253)         | 302 (264 to 352)          | 251 (218 to 291)                               | 294 (255 to 343) | 17.3% (12.4% to 22.7%)                                  |
| Guyana                           | 2157 (1897 to 2469)      | 2551 (2245 to 2910)       | 287 (254 to 325)                               | 333 (294 to 379) | 16.0% (12.5% to 19.9%)                                  |
| Haiti                            | 15742 (13525 to 18796)   | 30690 (26357 to 36272)    | 250 (216 to 295)                               | 249 (216 to 291) | -0.4% (-3.1% to 2.5%)                                   |
| Jamaica                          | 5951 (5034 to 7031)      | 7066 (6116 to 8286)       | 242 (207 to 283)                               | 248 (214 to 290) | 2.4% (-2.1% to 6.7%)                                    |
| Puerto Rico                      | 10006 (8277 to 12091)    | 8553 (7022 to 10417)      | 274 (226 to 331)                               | 254 (205 to 317) | -7.2% (-13.7% to -0.3%)                                 |

1  
2  
3  
4  
5  
6  
7  
8  
9  
10  
11  
12  
13  
14  
15  
16  
17  
18  
19  
20  
21  
22  
23  
24  
25  
26  
27  
28  
29  
30  
31  
32  
33  
34  
35  
36  
37  
38  
39  
40  
41  
42  
43  
44  
45  
46

| Location                                      | Incidence                    |                              |                                                |                  |                                                         |
|-----------------------------------------------|------------------------------|------------------------------|------------------------------------------------|------------------|---------------------------------------------------------|
|                                               | Numbers<br>(95% UI)          |                              | Age-standardized rates per 100,000<br>(95% UI) |                  | Percentage change of age-standardized rates<br>(95% UI) |
|                                               | (Year 1990)                  | (Year 2019)                  | (Year 1990)                                    | (Year 2019)      | (Year 1990–Year 2019)                                   |
| Saint Kitts and Nevis                         | 108 (84 to 139)              | 153 (122 to 195)             | 259 (204 to 330)                               | 266 (210 to 339) | 5.1% (-0.4% to 10.4%)                                   |
| Saint Lucia                                   | 369 (319 to 425)             | 491 (432 to 558)             | 268 (234 to 304)                               | 282 (246 to 324) | 2.7% (-2.8% to 8.0%)                                    |
| Saint Vincent and the Grenadines              | 271 (234 to 316)             | 306 (269 to 353)             | 243 (212 to 279)                               | 270 (237 to 313) | 11.1% (6.9% to 15.5%)                                   |
| Suriname                                      | 991 (857 to 1143)            | 1568 (1375 to 1790)          | 251 (218 to 287)                               | 275 (240 to 315) | 9.3% (4.7% to 14.4%)                                    |
| Trinidad and Tobago                           | 3132 (2698 to 3579)          | 3596 (3168 to 4101)          | 259 (224 to 294)                               | 264 (230 to 303) | 2.1% (-6.3% to 9.1%)                                    |
| United States Virgin Islands                  | 276 (225 to 344)             | 240 (196 to 296)             | 260 (213 to 323)                               | 245 (196 to 308) | -6.0% (-11.8% to -0.2%)                                 |
| <b>Tropical Latin America</b>                 | 402255 (323726 to 499391)    | 525871 (427539 to 647705)    | 261 (213 to 323)                               | 231 (187 to 286) | -11.5% (-14.6% to -8.6%)                                |
| Brazil                                        | 390799 (313409 to 486773)    | 504767 (408622 to 624274)    | 260 (211 to 323)                               | 229 (185 to 284) | -12.1% (-15.2% to -9.2%)                                |
| Paraguay                                      | 11457 (9813 to 13509)        | 21104 (18266 to 24583)       | 285 (248 to 330)                               | 300 (261 to 347) | 5.3% (1.4% to 9.3%)                                     |
| <b>Southeast Asia, East Asia, and Oceania</b> | 3011172 (2496898 to 3614257) | 5095208 (4280678 to 6104063) | 179 (150 to 214)                               | 222 (186 to 265) | 23.6% (19.5% to 27.7%)                                  |
| <b>East Asia</b>                              | 1777529 (1457606 to 2180900) | 3412591 (2824709 to 4137435) | 146 (120 to 178)                               | 207 (170 to 253) | 41.5% (34.7% to 48.6%)                                  |
| China                                         | 1691121 (1376509 to 2086871) | 3310055 (2727619 to 4021599) | 144 (118 to 176)                               | 208 (170 to 255) | 44.6% (37.5% to 52.0%)                                  |
| Democratic People's Republic of Korea         | 33855 (29762 to 39003)       | 47331 (41187 to 53742)       | 166 (146 to 190)                               | 166 (145 to 188) | 0.1% (-5.0% to 5.7%)                                    |
| Taiwan (Province of China)                    | 52553 (46334 to 59737)       | 55205 (48911 to 61794)       | 261 (232 to 296)                               | 193 (170 to 217) | -26.4% (-30.1% to -22.3%)                               |
| <b>Southeast Asia</b>                         | 1221270 (1035226 to 1428941) | 1653210 (1430159 to 1907523) | 270 (232 to 312)                               | 246 (213 to 284) | -8.8% (-13.7% to -5.1%)                                 |



1  
2  
3  
4  
5  
6  
7  
8  
9  
10  
11  
12  
13  
14  
15  
16  
17  
18  
19  
20  
21  
22  
23  
24  
25  
26  
27  
28  
29  
30  
31  
32  
33  
34  
35  
36  
37  
38  
39  
40  
41  
42  
43  
44  
45  
46

| Location                         | Incidence                 |                           |                                                |                  |                                                         |
|----------------------------------|---------------------------|---------------------------|------------------------------------------------|------------------|---------------------------------------------------------|
|                                  | Numbers<br>(95% UI)       |                           | Age-standardized rates per 100,000<br>(95% UI) |                  | Percentage change of age-standardized rates<br>(95% UI) |
|                                  | (Year 1990)               | (Year 2019)               | (Year 1990)                                    | (Year 2019)      | (Year 1990–Year 2019)                                   |
| Cambodia                         | 23951 (20415 to 28766)    | 43107 (37751 to 49401)    | 252 (218 to 293)                               | 276 (242 to 313) | 9.5% (-2.4% to 18.5%)                                   |
| Indonesia                        | 405050 (326221 to 499990) | 491104 (399909 to 601380) | 220 (180 to 269)                               | 189 (155 to 232) | -14.0% (-16.2% to -12.0%)                               |
| Lao People's Democratic Republic | 11572 (9505 to 15264)     | 16638 (14469 to 19086)    | 292 (245 to 374)                               | 239 (209 to 271) | -18.4% (-34.2% to -8.4%)                                |
| Malaysia                         | 46852 (40411 to 53545)    | 96768 (84367 to 110145)   | 284 (247 to 321)                               | 308 (268 to 349) | 8.6% (3.9% to 13.6%)                                    |
| Maldives                         | 420 (362 to 485)          | 1059 (923 to 1218)        | 211 (185 to 240)                               | 216 (188 to 248) | 2.3% (-2.6% to 7.7%)                                    |
| Mauritius                        | 2048 (1690 to 2468)       | 2646 (2190 to 3174)       | 183 (152 to 219)                               | 203 (167 to 245) | 10.8% (4.7% to 17.7%)                                   |
| Myanmar                          | 111688 (97238 to 129136)  | 136589 (119324 to 157635) | 281 (246 to 321)                               | 257 (224 to 297) | -8.6% (-12.9% to -4.6%)                                 |
| Philippines                      | 178811 (152160 to 209683) | 267241 (230496 to 309556) | 294 (252 to 341)                               | 246 (213 to 283) | -16.3% (-23.3% to -10.9%)                               |
| Seychelles                       | 149 (122 to 181)          | 223 (184 to 267)          | 205 (170 to 248)                               | 213 (174 to 257) | 3.7% (-1.4% to 9.1%)                                    |
| Sri Lanka                        | 85269 (60250 to 140083)   | 66466 (58700 to 75850)    | 489 (356 to 775)                               | 297 (262 to 338) | -39.2% (-60.6% to -18%)                                 |
| Thailand                         | 185784 (161287 to 212248) | 206998 (181911 to 233050) | 324 (284 to 367)                               | 273 (240 to 309) | -15.7% (-20% to -11.4%)                                 |
| Timor-Leste                      | 2892 (2003 to 4865)       | 2700 (2342 to 3110)       | 359 (258 to 575)                               | 216 (189 to 246) | -39.8% (-62% to -16.5%)                                 |
| Viet Nam                         | 165161 (142941 to 189272) | 319503 (279955 to 361856) | 264 (231 to 300)                               | 330 (290 to 374) | 24.8% (19.2% to 30.6%)                                  |
| Oceania                          | 12373 (10780 to 14206)    | 29408 (25561 to 33939)    | 213 (186 to 242)                               | 244 (214 to 280) | 14.8% (11.1% to 18.8%)                                  |
| American Samoa                   | 87 (71 to 106)            | 91 (75 to 111)            | 187 (155 to 227)                               | 168 (138 to 203) | -10.3% (-14.0% to -5.9%)                                |

1  
2  
3  
4  
5  
6  
7  
8  
9  
10  
11  
12  
13  
14  
15  
16  
17  
18  
19  
20  
21  
22  
23  
24  
25  
26  
27  
28  
29  
30  
31  
32  
33  
34  
35  
36  
37  
38  
39  
40  
41  
42  
43  
44  
45  
46

| Location                            | Incidence                    |                              |                                                |                   |                                                         |
|-------------------------------------|------------------------------|------------------------------|------------------------------------------------|-------------------|---------------------------------------------------------|
|                                     | Numbers<br>(95% UI)          |                              | Age-standardized rates per 100,000<br>(95% UI) |                   | Percentage change of age-standardized rates<br>(95% UI) |
|                                     | (Year 1990)                  | (Year 2019)                  | (Year 1990)                                    | (Year 2019)       | (Year 1990–Year 2019)                                   |
| Cook Islands                        | 41 (34 to 50)                | 35 (29 to 42)                | 229 (190 to 273)                               | 192 (156 to 234)  | -16.3% (-22.5% to -9.8%)                                |
| Fiji                                | 1296 (1125 to 1490)          | 1638 (1431 to 1875)          | 177 (155 to 200)                               | 184 (161 to 210)  | 4.2% (0.7% to 7.8%)                                     |
| Guam                                | 275 (225 to 332)             | 298 (247 to 363)             | 198 (164 to 237)                               | 176 (145 to 214)  | -11.2% (-15.7% to -6.9%)                                |
| Kiribati                            | 108 (94 to 124)              | 179 (155 to 207)             | 150 (132 to 170)                               | 155 (134 to 176)  | 3.1% (-0.8% to 7.4%)                                    |
| Marshall Islands                    | 81 (71 to 93)                | 117 (102 to 134)             | 208 (182 to 235)                               | 217 (190 to 247)  | 4.3% (1.0% to 7.9%)                                     |
| Micronesia (Federated States of)    | 193 (168 to 220)             | 220 (191 to 253)             | 211 (184 to 239)                               | 227 (198 to 259)  | 7.6% (3.8% to 11.6%)                                    |
| Nauru                               | 19 (15 to 23)                | 20 (17 to 25)                | 195 (162 to 234)                               | 199 (164 to 240)  | 1.7% (-2.4% to 5.9%)                                    |
| Niue                                | 4 (3 to 5)                   | 3 (2 to 4)                   | 176 (146 to 214)                               | 176 (145 to 215)  | 0.1% (-4.3% to 5.0%)                                    |
| Northern Mariana Islands            | 115 (94 to 139)              | 88 (73 to 108)               | 244 (203 to 294)                               | 205 (168 to 250)  | -16.1% (-20.5% to -10.7%)                               |
| Palau                               | 37 (30 to 45)                | 46 (38 to 56)                | 237 (196 to 288)                               | 249 (205 to 303)  | 4.8% (0.9% to 9.0%)                                     |
| Papua New Guinea                    | 7935 (6896 to 9122)          | 22541 (19552 to 26063)       | 221 (193 to 250)                               | 259 (227 to 298)  | 17.5% (12.8% to 22.3%)                                  |
| Samoa                               | 365 (316 to 423)             | 459 (398 to 531)             | 238 (208 to 271)                               | 232 (202 to 265)  | -2.8% (-10.4% to 3.5%)                                  |
| Solomon Islands                     | 698 (607 to 809)             | 1541 (1334 to 1813)          | 246 (216 to 283)                               | 270 (235 to 315)  | 9.9% (5.7% to 14.3%)                                    |
| Tokelau                             | 2 (2 to 3)                   | 2 (2 to 3)                   | 160 (133 to 193)                               | 167 (138 to 203)  | 4.3% (0.1% to 9.2%)                                     |
| Tonga                               | 168 (147 to 192)             | 176 (153 to 203)             | 191 (168 to 216)                               | 180 (156 to 206)  | -5.7% (-10.8% to -0.4%)                                 |
| Tuvalu                              | 15 (12 to 18)                | 20 (17 to 24)                | 162 (135 to 195)                               | 171 (142 to 208)  | 8.3% (4.6% to 12.0%)                                    |
| Vanuatu                             | 250 (218 to 286)             | 544 (472 to 630)             | 182 (159 to 205)                               | 197 (172 to 225)  | 5.5% (1.0% to 10.9%)                                    |
| <b>North Africa and Middle East</b> | 1282547 (1094820 to 1500156) | 1911495 (1624871 to 2305162) | 373 (320 to 432)                               | 319 (272 to 382)  | -14.5% (-24.8% to -4.0%)                                |
| <b>North Africa and Middle East</b> | 1282547 (1094820 to 1500156) | 1911495 (1624871 to 2305162) | 373 (320 to 432)                               | 319 (272 to 382)  | -14.5% (-24.8% to -4.0%)                                |
| Afghanistan                         | 34710 (26794 to 50241)       | 172744 (114294 to 298507)    | 302 (239 to 418)                               | 572 (347 to 1015) | 89.2% (38.3% to 157.5%)                                 |

1  
2  
3  
4  
5  
6  
7  
8  
9  
10  
11  
12  
13  
14  
15  
16  
17  
18  
19  
20  
21  
22  
23  
24  
25  
26  
27  
28  
29  
30  
31  
32  
33  
34  
35  
36  
37  
38  
39  
40  
41  
42  
43  
44  
45  
46

| Location                   | Incidence                 |                           |                                                |                  |                                                         |
|----------------------------|---------------------------|---------------------------|------------------------------------------------|------------------|---------------------------------------------------------|
|                            | Numbers<br>(95% UI)       |                           | Age-standardized rates per 100,000<br>(95% UI) |                  | Percentage change of age-standardized rates<br>(95% UI) |
|                            | (Year 1990)               | (Year 2019)               | (Year 1990)                                    | (Year 2019)      | (Year 1990–Year 2019)                                   |
| Algeria                    | 75841 (65370 to 88606)    | 109818 (95425 to 126366)  | 306 (268 to 349)                               | 266 (231 to 306) | -13.1% (-17.2% to -8.7%)                                |
| Bahrain                    | 1347 (1159 to 1554)       | 3605 (3131 to 4160)       | 261 (227 to 297)                               | 259 (224 to 299) | -0.7% (-5.5% to 4.4%)                                   |
| Egypt                      | 119851 (104161 to 138952) | 222467 (191763 to 257387) | 218 (191 to 250)                               | 230 (199 to 264) | 5.3% (0.5% to 10.6%)                                    |
| Iran (Islamic Republic of) | 481149 (369653 to 629092) | 224769 (194553 to 259552) | 832 (639 to 1097)                              | 267 (232 to 309) | -67.8% (-75.7% to -58%)                                 |
| Iraq                       | 69506 (57147 to 88661)    | 140292 (119415 to 166064) | 395 (330 to 493)                               | 321 (276 to 376) | -18.8% (-27.5% to -12.2%)                               |
| Jordan                     | 8955 (7700 to 10433)      | 26039 (22338 to 30461)    | 237 (208 to 272)                               | 223 (194 to 259) | -5.9% (-10.0% to -1.2%)                                 |
| Kuwait                     | 12821 (8346 to 22077)     | 12537 (10826 to 14617)    | 670 (448 to 1137)                              | 280 (243 to 324) | -58.2% (-76.0% to -37.2%)                               |
| Lebanon                    | 13842 (10371 to 21079)    | 12783 (11084 to 14829)    | 418 (319 to 615)                               | 248 (215 to 288) | -40.8% (-59.4% to -23.5%)                               |
| Libya                      | 11860 (10255 to 13694)    | 26776 (22306 to 34151)    | 295 (258 to 336)                               | 385 (320 to 494) | 30.4% (12.6% to 66.0%)                                  |
| Morocco                    | 70981 (61333 to 82278)    | 102188 (88863 to 118831)  | 281 (245 to 323)                               | 286 (250 to 331) | 1.7% (-2.5% to 5.9%)                                    |
| Oman                       | 7324 (6311 to 8515)       | 17119 (14700 to 19857)    | 416 (362 to 477)                               | 386 (336 to 438) | -7.2% (-11.9% to -2.0%)                                 |
| Palestine                  | 8161 (5922 to 12983)      | 12633 (10861 to 14734)    | 373 (278 to 561)                               | 255 (221 to 296) | -31.7% (-53.3% to -12.3%)                               |
| Qatar                      | 1979 (1696 to 2305)       | 11890 (10081 to 14150)    | 415 (361 to 477)                               | 374 (325 to 434) | -9.9% (-14.5% to -5.1%)                                 |
| Saudi Arabia               | 74970 (64447 to 88788)    | 242222 (207011 to 286739) | 500 (435 to 581)                               | 628 (542 to 735) | 25.6% (19.3% to 32.2%)                                  |
| Sudan                      | 59258 (38878 to 101160)   | 69744 (56092 to 87454)    | 289 (195 to 484)                               | 172 (141 to 213) | -40.5% (-64.4% to -16.4%)                               |

1  
2  
3  
4  
5  
6  
7  
8  
9  
10  
11  
12  
13  
14  
15  
16  
17  
18  
19  
20  
21  
22  
23  
24  
25  
26  
27  
28  
29  
30  
31  
32  
33  
34  
35  
36  
37  
38  
39  
40  
41  
42  
43  
44  
45  
46

| Location             | Incidence                    |                               |                                                |                  |                                                         |
|----------------------|------------------------------|-------------------------------|------------------------------------------------|------------------|---------------------------------------------------------|
|                      | Numbers<br>(95% UI)          |                               | Age-standardized rates per 100,000<br>(95% UI) |                  | Percentage change of age-standardized rates<br>(95% UI) |
|                      | (Year 1990)                  | (Year 2019)                   | (Year 1990)                                    | (Year 2019)      | (Year 1990–Year 2019)                                   |
| Syrian Arab Republic | 27298 (23322 to 32182)       | 52830 (39544 to 76766)        | 212 (184 to 244)                               | 414 (297 to 626) | 95.4% (43.6% to 192.7%)                                 |
| Tunisia              | 22252 (19108 to 26018)       | 31759 (27629 to 36591)        | 265 (229 to 306)                               | 274 (238 to 317) | 3.3% (-1.0% to 8.1%)                                    |
| Turkey               | 141441 (122511 to 163565)    | 219256 (191556 to 254991)     | 236 (205 to 270)                               | 265 (232 to 308) | 12.5% (5.2% to 20.0%)                                   |
| United Arab Emirates | 6539 (5617 to 7609)          | 33183 (28455 to 38552)        | 357 (312 to 410)                               | 330 (286 to 378) | -7.6% (-11.2% to -3.8%)                                 |
| Yemen                | 31601 (27106 to 36896)       | 164898 (108336 to 287669)     | 250 (218 to 286)                               | 496 (338 to 841) | 98.1% (35.1% to 236.3%)                                 |
| South Asia           | 4300736 (3694519 to 4984977) | 8775756 (7523034 to 10153936) | 450 (388 to 515)                               | 508 (438 to 587) | 13.1% (9.7% to 16.1%)                                   |
| South Asia           | 4300736 (3694519 to 4984977) | 8775756 (7523034 to 10153936) | 450 (388 to 515)                               | 508 (438 to 587) | 13.1% (9.7% to 16.1%)                                   |
| Bangladesh           | 278929 (238243 to 322617)    | 498953 (428415 to 575427)     | 278 (241 to 319)                               | 308 (266 to 353) | 10.8% (6.4% to 15.7%)                                   |
| Bhutan               | 1970 (1681 to 2296)          | 3152 (2726 to 3617)           | 348 (302 to 397)                               | 419 (366 to 478) | 20.5% (14.9% to 26.4%)                                  |
| India                | 3699867 (3165789 to 4285733) | 7464821 (6383527 to 8667434)  | 499 (431 to 574)                               | 554 (476 to 641) | 11.1% (7.3% to 14.3%)                                   |
| Nepal                | 58632 (50978 to 67502)       | 108778 (94776 to 125460)      | 338 (296 to 384)                               | 369 (323 to 422) | 9.2% (5.7% to 12.4%)                                    |
| Pakistan             | 261338 (223563 to 302917)    | 700052 (592408 to 822394)     | 266 (229 to 305)                               | 337 (287 to 390) | 26.7% (22.8% to 30.3%)                                  |
| Sub-Saharan Africa   | 1537445 (1146016 to 2275614) | 2216929 (1852407 to 2642459)  | 329 (256 to 461)                               | 231 (195 to 272) | -29.7% (-47.0% to -15.2%)                               |

1  
2  
3  
4  
5  
6  
7  
8  
9  
10  
11  
12  
13  
14  
15  
16  
17  
18  
19  
20  
21  
22  
23  
24  
25  
26  
27  
28  
29  
30  
31  
32  
33  
34  
35  
36  
37  
38  
39  
40  
41  
42  
43  
44  
45  
46

| Location                           | Incidence                 |                            |                                                |                  |                                                         |
|------------------------------------|---------------------------|----------------------------|------------------------------------------------|------------------|---------------------------------------------------------|
|                                    | Numbers<br>(95% UI)       |                            | Age-standardized rates per 100,000<br>(95% UI) |                  | Percentage change of age-standardized rates<br>(95% UI) |
|                                    | (Year 1990)               | (Year 2019)                | (Year 1990)                                    | (Year 2019)      | (Year 1990–Year 2019)                                   |
| <b>Southern Sub-Saharan Africa</b> | 115447 (93813 to 140794)  | 147127 (120571 to 177386)  | 233 (192 to 280)                               | 190 (157 to 230) | -18.4% (-21.4% to -15.8%)                               |
| Botswana                           | 2191 (1767 to 2682)       | 4653 (3836 to 5610)        | 175 (145 to 211)                               | 202 (168 to 244) | 15.3% (9.5% to 20.7%)                                   |
| Eswatini                           | 1290 (1050 to 1590)       | 2178 (1798 to 2635)        | 175 (146 to 211)                               | 199 (165 to 238) | 13.4% (8.6% to 18.4%)                                   |
| Lesotho                            | 2845 (2325 to 3480)       | 4350 (3601 to 5251)        | 164 (137 to 198)                               | 212 (177 to 254) | 29.1% (22.4% to 35.8%)                                  |
| Namibia                            | 2572 (2114 to 3133)       | 4813 (3964 to 5787)        | 201 (168 to 239)                               | 210 (174 to 251) | 4.7% (0.9% to 9.1%)                                     |
| South Africa                       | 91918 (74258 to 112133)   | 108940 (88449 to 131433)   | 258 (210 to 311)                               | 195 (159 to 235) | -24.4% (-27.7% to -21.5%)                               |
| Zimbabwe                           | 14631 (11818 to 17980)    | 22193 (18083 to 27027)     | 161 (135 to 192)                               | 160 (133 to 193) | -0.7% (-6.1% to 7.4%)                                   |
| <b>Western Sub-Saharan Africa</b>  | 382027 (311502 to 464214) | 911247 (745370 to 1110360) | 224 (187 to 269)                               | 233 (194 to 277) | 3.6% (-0.4% to 6.6%)                                    |
| Benin                              | 9289 (7594 to 11299)      | 25317 (20605 to 30904)     | 228 (189 to 275)                               | 238 (197 to 287) | 4.2% (0.5% to 8.8%)                                     |
| Burkina Faso                       | 17138 (13980 to 20844)    | 51473 (42015 to 62572)     | 219 (181 to 263)                               | 271 (224 to 327) | 23.9% (16.6% to 35.9%)                                  |
| Cabo Verde                         | 609 (496 to 741)          | 1224 (1005 to 1456)        | 184 (152 to 221)                               | 220 (182 to 260) | 19.3% (14.5% to 24.5%)                                  |
| Cameroon                           | 22582 (18328 to 27491)    | 72858 (58673 to 89401)     | 261 (215 to 315)                               | 290 (239 to 352) | 11.3% (5.6% to 18.6%)                                   |
| Chad                               | 13637 (10288 to 19609)    | 32204 (26198 to 38993)     | 250 (194 to 347)                               | 241 (201 to 289) | -3.7% (-23.2% to 10.8%)                                 |
| Côte d'Ivoire                      | 24499 (20017 to 29733)    | 54433 (44435 to 65820)     | 246 (205 to 295)                               | 245 (203 to 294) | -0.3% (-3.9% to 3.6%)                                   |
| Gambia                             | 1659 (1344 to 2036)       | 4001 (3257 to 4890)        | 196 (163 to 236)                               | 209 (173 to 250) | 6.3% (3.1% to 9.8%)                                     |

1  
2  
3  
4  
5  
6  
7  
8  
9  
10  
11  
12  
13  
14  
15  
16  
17  
18  
19  
20  
21  
22  
23  
24  
25  
26  
27  
28  
29  
30  
31  
32  
33  
34  
35  
36  
37  
38  
39  
40  
41  
42  
43  
44  
45  
46

| Location                          | Incidence                  |                            |                                                |                  |                                                         |
|-----------------------------------|----------------------------|----------------------------|------------------------------------------------|------------------|---------------------------------------------------------|
|                                   | Numbers<br>(95% UI)        |                            | Age-standardized rates per 100,000<br>(95% UI) |                  | Percentage change of age-standardized rates<br>(95% UI) |
|                                   | (Year 1990)                | (Year 2019)                | (Year 1990)                                    | (Year 2019)      | (Year 1990–Year 2019)                                   |
| Ghana                             | 31030 (25268 to 37891)     | 82612 (67111 to 100632)    | 235 (193 to 284)                               | 281 (230 to 341) | 19.5% (15.0% to 24.4%)                                  |
| Guinea                            | 11807 (9667 to 14382)      | 26064 (21153 to 31734)     | 214 (178 to 256)                               | 244 (201 to 293) | 13.7% (8.8% to 18.5%)                                   |
| Guinea-Bissau                     | 2419 (1965 to 2966)        | 4638 (3724 to 5718)        | 273 (224 to 332)                               | 271 (220 to 329) | -0.7% (-4.6% to 3.2%)                                   |
| Liberia                           | 19837 (8502 to 45461)      | 8013 (6513 to 9752)        | 987 (444 to 2198)                              | 190 (157 to 229) | -80.7% (-91.5% to -56.7%)                               |
| Mali                              | 18839 (14989 to 24426)     | 44120 (35428 to 55449)     | 244 (197 to 309)                               | 236 (193 to 290) | -3.3% (-9.3% to 1.5%)                                   |
| Mauritania                        | 5543 (4481 to 6780)        | 9567 (7760 to 11677)       | 304 (247 to 368)                               | 263 (216 to 320) | -13.2% (-17.7% to -8.6%)                                |
| Niger                             | 15116 (12366 to 18488)     | 41182 (33534 to 50198)     | 219 (182 to 262)                               | 217 (181 to 258) | -0.9% (-4.8% to 2.7%)                                   |
| Nigeria                           | 159087 (129032 to 196310)  | 389966 (316281 to 480854)  | 198 (163 to 238)                               | 212 (175 to 257) | 7.3% (3.5% to 13.0%)                                    |
| Sao Tome and Principe             | 232 (190 to 285)           | 463 (378 to 558)           | 210 (175 to 252)                               | 247 (204 to 295) | 17.6% (13.2% to 22.4%)                                  |
| Senegal                           | 14134 (11507 to 17228)     | 28943 (23477 to 35172)     | 215 (179 to 257)                               | 218 (179 to 261) | 1.4% (-4.0% to 6.0%)                                    |
| Sierra Leone                      | 6798 (5591 to 8288)        | 16290 (13229 to 19977)     | 209 (172 to 252)                               | 226 (187 to 274) | 8.1% (3.7% to 12.2%)                                    |
| Togo                              | 7757 (6242 to 9634)        | 17866 (14519 to 21873)     | 237 (195 to 289)                               | 244 (201 to 296) | 2.8% (-1.3% to 6.4%)                                    |
| <b>Eastern Sub-Saharan Africa</b> | 915689 (614243 to 1558449) | 904591 (757646 to 1080346) | 491 (344 to 789)                               | 246 (209 to 286) | -49.8% (-67.5% to -30.4%)                               |
| Burundi                           | 14420 (12357 to 16712)     | 29122 (24824 to 33800)     | 304 (264 to 348)                               | 281 (243 to 322) | -7.6% (-10.8% to -4.0%)                                 |
| Comoros                           | 1286 (1046 to 1588)        | 2099 (1712 to 2554)        | 304 (249 to 371)                               | 302 (248 to 365) | -0.6% (-5.0% to 4.0%)                                   |
| Djibouti                          | 1450 (1119 to 2040)        | 2864 (2318 to 3491)        | 317 (251 to 421)                               | 255 (211 to 310) | -19.5% (-35.4% to -7.4%)                                |

1  
2  
3  
4  
5  
6  
7  
8  
9  
10  
11  
12  
13  
14  
15  
16  
17  
18  
19  
20  
21  
22  
23  
24  
25  
26  
27  
28  
29  
30  
31  
32  
33  
34  
35  
36  
37  
38  
39  
40  
41  
42  
43  
44  
45  
46

| Location                    | Incidence                  |                           |                                                |                  |                                                         |
|-----------------------------|----------------------------|---------------------------|------------------------------------------------|------------------|---------------------------------------------------------|
|                             | Numbers<br>(95% UI)        |                           | Age-standardized rates per 100,000<br>(95% UI) |                  | Percentage change of age-standardized rates<br>(95% UI) |
|                             | (Year 1990)                | (Year 2019)               | (Year 1990)                                    | (Year 2019)      | (Year 1990–Year 2019)                                   |
| Eritrea                     | 45882 (18912 to 107796)    | 15655 (12704 to 19149)    | 1411 (622 to 3143)                             | 254 (210 to 305) | -82% (-92.1% to -58%)                                   |
| Ethiopia                    | 533016 (297003 to 1055456) | 232073 (198395 to 270172) | 1019 (601 to 1899)                             | 249 (218 to 284) | -75.5% (-86.6% to -58.1%)                               |
| Kenya                       | 49374 (42201 to 57573)     | 114355 (98124 to 132513)  | 254 (221 to 290)                               | 259 (225 to 295) | 1.8% (0.8% to 2.7%)                                     |
| Madagascar                  | 28238 (22733 to 34714)     | 57866 (47018 to 70749)    | 254 (208 to 309)                               | 233 (192 to 279) | -8.5% (-12.3% to -4.0%)                                 |
| Malawi                      | 17980 (14480 to 22169)     | 33959 (27334 to 42233)    | 204 (167 to 246)                               | 197 (162 to 238) | -3.3% (-6.9% to 0.5%)                                   |
| Mozambique                  | 40434 (30166 to 60812)     | 79887 (64958 to 97654)    | 335 (261 to 486)                               | 318 (261 to 381) | -5.2% (-31.8% to 12.2%)                                 |
| Rwanda                      | 33831 (23013 to 55618)     | 30616 (24797 to 37465)    | 494 (354 to 772)                               | 259 (213 to 313) | -47.6% (-65.9% to -31.3%)                               |
| Somalia                     | 27638 (17267 to 51140)     | 50001 (39176 to 66334)    | 405 (266 to 709)                               | 267 (215 to 343) | -34.2% (-53.7% to -13.8%)                               |
| South Sudan                 | 14422 (11653 to 17614)     | 23374 (18761 to 29502)    | 275 (227 to 332)                               | 275 (227 to 342) | 0.3% (-6.9% to 14.1%)                                   |
| Uganda                      | 38848 (31013 to 49200)     | 85312 (69281 to 105407)   | 246 (202 to 304)                               | 230 (191 to 275) | -6.6% (-18.4% to 0.9%)                                  |
| United Republic of Tanzania | 53724 (43604 to 65758)     | 113661 (92406 to 139892)  | 225 (186 to 272)                               | 216 (180 to 261) | -3.9% (-7.5% to -0.3%)                                  |
| Zambia                      | 14474 (11753 to 17785)     | 33022 (26718 to 40468)    | 201 (168 to 241)                               | 199 (165 to 239) | -0.9% (-5.2% to 3.4%)                                   |

1  
2  
3  
4  
5  
6  
7  
8  
9  
10  
11  
12  
13  
14  
15  
16  
17  
18  
19  
20  
21  
22  
23  
24  
25  
26  
27  
28  
29  
30  
31  
32  
33  
34  
35  
36  
37  
38  
39  
40  
41  
42  
43  
44  
45  
46

| Location                         | Incidence                 |                           |                                                |                  |                                                         |
|----------------------------------|---------------------------|---------------------------|------------------------------------------------|------------------|---------------------------------------------------------|
|                                  | Numbers<br>(95% UI)       |                           | Age-standardized rates per 100,000<br>(95% UI) |                  | Percentage change of age-standardized rates<br>(95% UI) |
|                                  | (Year 1990)               | (Year 2019)               | (Year 1990)                                    | (Year 2019)      | (Year 1990–Year 2019)                                   |
| Central Sub-Saharan Africa       | 124283 (103595 to 154993) | 253964 (218605 to 293993) | 244 (207 to 294)                               | 217 (189 to 246) | -11.3% (-19.9% to -5.1%)                                |
| Angola                           | 39241 (27108 to 66030)    | 56663 (48838 to 65681)    | 382 (278 to 599)                               | 218 (190 to 247) | -43% (-63.3% to -22.5%)                                 |
| Central African Republic         | 4641 (4002 to 5348)       | 12095 (9996 to 15534)     | 192 (167 to 218)                               | 243 (205 to 301) | 26.6% (13.1% to 54.7%)                                  |
| Congo                            | 4611 (3977 to 5326)       | 9480 (8121 to 10899)      | 216 (188 to 245)                               | 200 (173 to 227) | -7.3% (-10.2% to -4.3%)                                 |
| Democratic Republic of the Congo | 72855 (62741 to 84539)    | 169290 (145141 to 197215) | 213 (186 to 243)                               | 215 (188 to 247) | 1.2% (-2.9% to 7.3%)                                    |
| Equatorial Guinea                | 766 (659 to 879)          | 2665 (2278 to 3133)       | 200 (173 to 225)                               | 211 (184 to 242) | 5.9% (1.1% to 10.6%)                                    |
| Gabon                            | 2170 (1871 to 2497)       | 3771 (3259 to 4323)       | 243 (211 to 276)                               | 234 (204 to 265) | -3.7% (-6.6% to -0.6%)                                  |

Abbreviations: UI, uncertainty interval



1  
2  
3  
4  
5  
6  
7  
8  
9  
10  
11  
12  
13  
14  
15  
16  
17  
18  
19  
20  
21  
22  
23  
24  
25  
26  
27  
28  
29  
30  
31  
32  
33  
34  
35  
36  
37  
38  
39  
40  
41  
42  
43  
44  
45  
46

Table 9. Prevalence of traumatic brain injury in 1990 and 2019, and percentage changes of age-standardized estimates by location, 1990–2019

| Location                  | Prevalence                      |                                 |                                                    |                     |                                                             |
|---------------------------|---------------------------------|---------------------------------|----------------------------------------------------|---------------------|-------------------------------------------------------------|
|                           | Numbers<br>(95% UI)             |                                 | Age-standardized estimates per 100,000<br>(95% UI) |                     | Percentage change of age-standardized<br>estimates (95% UI) |
|                           | (Year 1990)                     | (Year 2019)                     | (Year 1990)                                        | (Year 2019)         | (Year 1990–Year 2019)                                       |
| Global                    | 27223249 (26109471 to 28451588) | 48987927 (46840150 to 51316804) | 599 (576 to 626)                                   | 599 (573 to 627)    | 0.0% (-1.1% to 1.2%)                                        |
| High-income               | 7083312 (6797231 to 7400614)    | 9628688 (9197255 to 10070244)   | 669 (642 to 699)                                   | 611 (585 to 640)    | -8.6% (-9.6% to -7.6%)                                      |
| High-income North America | 1787399 (1704060 to 1883324)    | 2529864 (2411434 to 2659615)    | 564 (537 to 595)                                   | 503 (480 to 530)    | -10.8% (-12% to -9.6%)                                      |
| Canada                    | 232061 (221455 to 242912)       | 409106 (389130 to 430098)       | 751 (717 to 786)                                   | 732 (699 to 768)    | -2.5% (-4.4% to -0.4%)                                      |
| Greenland                 | 268 (254 to 284)                | 273 (261 to 287)                | 546 (520 to 576)                                   | 418 (399 to 439)    | -23.5% (-24.8% to -22.1%)                                   |
| United States of America  | 1555029 (1478138 to 1643310)    | 2120444 (2015771 to 2235606)    | 545 (517 to 576)                                   | 476 (452 to 503)    | -12.6% (-13.9% to -11.4%)                                   |
| Australasia               | 245389 (233066 to 259182)       | 437585 (414576 to 462102)       | 1117 (1059 to 1181)                                | 1145 (1082 to 1220) | 2.5% (0.7% to 4.3%)                                         |
| Australia                 | 198541 (188680 to 209805)       | 361334 (342297 to 381913)       | 1084 (1029 to 1148)                                | 1118 (1056 to 1194) | 3.1% (1.2% to 5.2%)                                         |
| New Zealand               | 46848 (44344 to 49303)          | 76252 (72471 to 80358)          | 1282 (1214 to 1352)                                | 1291 (1225 to 1367) | 0.7% (-1.4% to 3.3%)                                        |
| High-income Asia Pacific  | 1146281 (1098572 to 1197980)    | 1569359 (1503598 to 1638630)    | 583 (560 to 609)                                   | 526 (504 to 552)    | -9.8% (-11.0% to -8.5%)                                     |
| Brunei Darussalam         | 1433 (1363 to 1505)             | 2753 (2625 to 2901)             | 748 (716 to 783)                                   | 645 (618 to 676)    | -13.7% (-15.4% to -12.1%)                                   |
| Japan                     | 794144 (759571 to 830984)       | 942598 (902464 to 984158)       | 515 (492 to 539)                                   | 432 (413 to 452)    | -16.1% (-17.2% to -15%)                                     |

1  
2

| Location          | Prevalence                   |                              |                                                    |                   |                                                             |
|-------------------|------------------------------|------------------------------|----------------------------------------------------|-------------------|-------------------------------------------------------------|
|                   | Numbers<br>(95% UI)          |                              | Age-standardized estimates per 100,000<br>(95% UI) |                   | Percentage change of age-standardized<br>estimates (95% UI) |
|                   | (Year 1990)                  | (Year 2019)                  | (Year 1990)                                        | (Year 2019)       | (Year 1990–Year 2019)                                       |
| Republic of Korea | 331627 (317243 to 347338)    | 578220 (549546 to 608111)    | 826 (791 to 864)                                   | 756 (719 to 796)  | -8.5% (-10.5% to -6.5%)                                     |
| Singapore         | 19078 (18198 to 20119)       | 45787 (43497 to 48284)       | 636 (609 to 668)                                   | 619 (589 to 654)  | -2.7% (-4.7% to -0.7%)                                      |
| Western Europe    | 3589411 (3430217 to 3763722) | 4558854 (4307986 to 4805028) | 752 (718 to 789)                                   | 687 (652 to 726)  | -8.5% (-10.2% to -6.8%)                                     |
| Andorra           | 485 (461 to 511)             | 1054 (1001 to 1112)          | 843 (800 to 887)                                   | 860 (816 to 908)  | 2.1% (0.2% to 4.3%)                                         |
| Austria           | 84367 (80516 to 88743)       | 102932 (97216 to 109369)     | 867 (826 to 913)                                   | 764 (721 to 815)  | -11.8% (-14% to -9.3%)                                      |
| Belgium           | 107317 (102334 to 112625)    | 157277 (148398 to 167372)    | 855 (813 to 898)                                   | 903 (852 to 962)  | 5.6% (3.0% to 8.4%)                                         |
| Cyprus            | 5615 (5361 to 5897)          | 11806 (11149 to 12487)       | 695 (663 to 730)                                   | 709 (669 to 751)  | 2.0% (-0.8% to 5.0%)                                        |
| Denmark           | 53543 (50856 to 56416)       | 55684 (52605 to 58826)       | 791 (754 to 830)                                   | 678 (638 to 721)  | -14.3% (-16.9% to -11.6%)                                   |
| Finland           | 65196 (61947 to 69082)       | 85065 (80164 to 90379)       | 1061 (1006 to 1125)                                | 997 (936 to 1071) | -6.0% (-8.3% to -3.3%)                                      |
| France            | 635312 (606658 to 665578)    | 850166 (803396 to 897985)    | 898 (859 to 942)                                   | 831 (786 to 879)  | -7.6% (-9.7% to -5.4%)                                      |
| Germany           | 755519 (721936 to 795139)    | 943401 (888790 to 996046)    | 732 (698 to 772)                                   | 700 (661 to 744)  | -4.4% (-6.9% to -1.9%)                                      |
| Greece            | 96681 (92044 to 101849)      | 102345 (97112 to 107847)     | 763 (725 to 805)                                   | 673 (635 to 713)  | -11.9% (-13.9% to -9.7%)                                    |
| Iceland           | 1951 (1860 to 2050)          | 3117 (2943 to 3311)          | 728 (694 to 766)                                   | 699 (657 to 745)  | -4.1% (-6.7% to -1.5%)                                      |

40  
41  
42  
43  
44  
45  
46

1

2

3

4

5

6

7

8

9

10

11

12

13

14

15

16

17

18

19

20

21

22

23

24

25

26

27

28

29

30

31

32

33

34

35

36

37

38

39

40

41

42

43

44

45

46

47

48

49

50

51

52

53

54

| Location       | Prevalence                |                           |                                                    |                  |                                                             |
|----------------|---------------------------|---------------------------|----------------------------------------------------|------------------|-------------------------------------------------------------|
|                | Numbers<br>(95% UI)       |                           | Age-standardized estimates per 100,000<br>(95% UI) |                  | Percentage change of age-standardized<br>estimates (95% UI) |
|                | (Year 1990)               | (Year 2019)               | (Year 1990)                                        | (Year 2019)      | (Year 1990–Year 2019)                                       |
| Ireland        | 25441 (24177 to 26775)    | 41596 (39247 to 44184)    | 686 (652 to 723)                                   | 678 (639 to 724) | -1.1% (-3.7% to 1.5%)                                       |
| Israel         | 29810 (28368 to 31355)    | 65091 (61407 to 69200)    | 629 (599 to 661)                                   | 652 (613 to 695) | 3.6% (0.3% to 7.5%)                                         |
| Italy          | 594610 (561364 to 626824) | 652766 (614279 to 691707) | 808 (764 to 852)                                   | 657 (621 to 694) | -18.7% (-20.0% to -17.3%)                                   |
| Luxembourg     | 4203 (4008 to 4421)       | 6658 (6300 to 7033)       | 889 (848 to 935)                                   | 788 (746 to 834) | -11.4% (-13.4% to -9.2%)                                    |
| Malta          | 2782 (2636 to 2936)       | 4834 (4558 to 5115)       | 685 (648 to 724)                                   | 754 (709 to 804) | 10.1% (7.5% to 12.8%)                                       |
| Monaco         | 164 (156 to 172)          | 213 (203 to 224)          | 366 (348 to 386)                                   | 370 (352 to 391) | 1.1% (-0.8% to 3.0%)                                        |
| Netherlands    | 108496 (103271 to 113683) | 174265 (164438 to 183817) | 612 (583 to 643)                                   | 659 (625 to 692) | 7.6% (5.0% to 10.0%)                                        |
| Norway         | 24469 (23315 to 25771)    | 29219 (27778 to 30849)    | 456 (435 to 479)                                   | 387 (369 to 408) | -15.1% (-16.4% to -13.7%)                                   |
| Portugal       | 84457 (80974 to 88627)    | 83546 (79556 to 87660)    | 713 (683 to 749)                                   | 495 (472 to 520) | -30.6% (-32.7% to -28.7%)                                   |
| San Marino     | 112 (107 to 118)          | 174 (167 to 183)          | 407 (388 to 429)                                   | 382 (363 to 404) | -6.2% (-8.1% to -4.3%)                                      |
| Spain          | 340863 (326210 to 356774) | 455709 (431959 to 480189) | 747 (715 to 783)                                   | 663 (626 to 706) | -11.3% (-14.6% to -8.2%)                                    |
| Sweden         | 46088 (43789 to 48587)    | 52538 (49831 to 55634)    | 411 (390 to 434)                                   | 357 (339 to 378) | -13.2% (-14.8% to -11.4%)                                   |
| Switzerland    | 95970 (91290 to 100912)   | 118708 (111882 to 125639) | 1082 (1027 to 1137)                                | 886 (832 to 944) | -18.1% (-20.1% to -15.4%)                                   |
| United Kingdom | 422981 (402489 to 443629) | 556715 (524564 to 587112) | 599 (570 to 630)                                   | 592 (559 to 625) | -1.2% (-3.0% to 0.5%)                                       |

1  
2  
3  
4  
5  
6  
7  
8  
9  
10  
11  
12  
13  
14  
15  
16  
17  
18  
19  
20  
21  
22  
23  
24  
25  
26  
27  
28  
29  
30  
31  
32  
33  
34  
35  
36  
37  
38  
39  
40  
41  
42  
43  
44  
45  
46

| Location                                                | Prevalence                   |                              |                                                    |                     |                                                             |
|---------------------------------------------------------|------------------------------|------------------------------|----------------------------------------------------|---------------------|-------------------------------------------------------------|
|                                                         | Numbers<br>(95% UI)          |                              | Age-standardized estimates per 100,000<br>(95% UI) |                     | Percentage change of age-standardized<br>estimates (95% UI) |
|                                                         | (Year 1990)                  | (Year 2019)                  | (Year 1990)                                        | (Year 2019)         | (Year 1990–Year 2019)                                       |
| <b>Southern Latin America</b>                           | 314832 (302011 to 328300)    | 533026 (510966 to 557226)    | 661 (635 to 689)                                   | 710 (680 to 744)    | 7.4% (5.7% to 9.0%)                                         |
| Argentina                                               | 211134 (202345 to 220806)    | 341995 (327397 to 357857)    | 655 (628 to 685)                                   | 694 (664 to 727)    | 6.0% (3.9% to 8.0%)                                         |
| Chile                                                   | 77223 (74043 to 80606)       | 158038 (151516 to 164956)    | 649 (624 to 678)                                   | 732 (701 to 765)    | 12.7% (10.9% to 14.8%)                                      |
| Uruguay                                                 | 26462 (25314 to 27602)       | 32966 (31674 to 34324)       | 782 (747 to 816)                                   | 790 (757 to 823)    | 0.9% (-1.4% to 3.3%)                                        |
| <b>Central Europe, Eastern Europe, and Central Asia</b> | 6453206 (6144026 to 6810900) | 6272924 (5973428 to 6619235) | 1421 (1353 to 1499)                                | 1179 (1121 to 1245) | -17.0% (-17.9% to -16.2%)                                   |
| <b>Eastern Europe</b>                                   | 4141204 (3921920 to 4395004) | 3684328 (3481748 to 3916305) | 1593 (1511 to 1688)                                | 1312 (1240 to 1393) | -17.6% (-18.6% to -16.7%)                                   |
| Belarus                                                 | 160205 (152714 to 168752)    | 151525 (144167 to 160168)    | 1345 (1281 to 1414)                                | 1175 (1117 to 1241) | -12.7% (-14.5% to -11.1%)                                   |
| Estonia                                                 | 29223 (27868 to 30752)       | 19177 (18313 to 20152)       | 1597 (1521 to 1679)                                | 1044 (995 to 1095)  | -34.7% (-36.1% to -33.0%)                                   |
| Latvia                                                  | 55190 (52619 to 58063)       | 30132 (28879 to 31651)       | 1742 (1662 to 1833)                                | 1095 (1046 to 1150) | -37.2% (-38.4% to -35.9%)                                   |
| Lithuania                                               | 68835 (65919 to 72396)       | 49561 (47552 to 51935)       | 1648 (1577 to 1732)                                | 1205 (1155 to 1265) | -26.9% (-28.3% to -25.2%)                                   |
| Republic of Moldova                                     | 57736 (55297 to 60492)       | 45620 (43596 to 47808)       | 1260 (1207 to 1321)                                | 939 (896 to 983)    | -25.5% (-27.0% to -24.1%)                                   |
| Russian Federation                                      | 2844919 (2690581 to 3021463) | 2659714 (2510186 to 2831620) | 1658 (1569 to 1758)                                | 1365 (1288 to 1450) | -17.7% (-18.8% to -16.6%)                                   |

| Location               | Prevalence                   |                              |                                                    |                     |                                                             |
|------------------------|------------------------------|------------------------------|----------------------------------------------------|---------------------|-------------------------------------------------------------|
|                        | Numbers<br>(95% UI)          |                              | Age-standardized estimates per 100,000<br>(95% UI) |                     | Percentage change of age-standardized<br>estimates (95% UI) |
|                        | (Year 1990)                  | (Year 2019)                  | (Year 1990)                                        | (Year 2019)         | (Year 1990–Year 2019)                                       |
| Ukraine                | 925096 (875143 to 984013)    | 728598 (688793 to 774019)    | 1471 (1391 to 1563)                                | 1229 (1162 to 1305) | -16.5% (-18.1% to -15.0%)                                   |
| Central Europe         | 1905530 (1824286 to 1993636) | 1996004 (1907261 to 2099717) | 1389 (1329 to 1454)                                | 1259 (1200 to 1325) | -9.3% (-10.7% to -8.0%)                                     |
| Albania                | 32988 (31362 to 34644)       | 40368 (38379 to 42440)       | 1185 (1128 to 1242)                                | 1180 (1119 to 1241) | -0.4% (-3.1% to 1.7%)                                       |
| Bosnia and Herzegovina | 50335 (48011 to 52860)       | 55240 (51846 to 59262)       | 1075 (1026 to 1129)                                | 1233 (1156 to 1324) | 14.7% (11.3% to 20.0%)                                      |
| Bulgaria               | 140389 (134253 to 147124)    | 115486 (110330 to 121483)    | 1332 (1273 to 1396)                                | 1206 (1148 to 1267) | -9.5% (-11.0% to -7.8%)                                     |
| Croatia                | 88909 (84838 to 92936)       | 90349 (86071 to 94948)       | 1530 (1459 to 1599)                                | 1430 (1363 to 1501) | -6.6% (-8.7% to -4.4%)                                      |
| Czechia                | 190939 (182529 to 199866)    | 210700 (201553 to 221445)    | 1581 (1510 to 1658)                                | 1397 (1333 to 1468) | -11.6% (-13.6% to -9.5%)                                    |
| Hungary                | 188342 (179917 to 196921)    | 166974 (159293 to 175128)    | 1482 (1418 to 1550)                                | 1197 (1140 to 1257) | -19.3% (-21.3% to -17.1%)                                   |
| Montenegro             | 8049 (7690 to 8410)          | 9943 (9483 to 10437)         | 1247 (1192 to 1303)                                | 1250 (1192 to 1312) | 0.2% (-1.4% to 1.9%)                                        |
| North Macedonia        | 21250 (20272 to 22230)       | 30086 (28684 to 31639)       | 1036 (989 to 1084)                                 | 1095 (1042 to 1151) | 5.7% (3.4% to 7.7%)                                         |
| Poland                 | 592344 (565150 to 624014)    | 701517 (667414 to 740911)    | 1425 (1359 to 1501)                                | 1313 (1247 to 1386) | -7.9% (-9.5% to -6.3%)                                      |
| Romania                | 341836 (326973 to 358956)    | 296504 (282553 to 312297)    | 1307 (1249 to 1370)                                | 1120 (1063 to 1179) | -14.3% (-16.1% to -12.8%)                                   |

1  
2  
3  
4  
5  
6  
7  
8  
9  
10  
11  
12  
13  
14  
15  
16  
17  
18  
19  
20  
21  
22  
23  
24  
25  
26  
27  
28  
29  
30  
31  
32  
33  
34  
35  
36  
37  
38  
39  
40  
41  
42  
43  
44  
45  
46

| Location     | Prevalence                |                           |                                                    |                     |                                                             |
|--------------|---------------------------|---------------------------|----------------------------------------------------|---------------------|-------------------------------------------------------------|
|              | Numbers<br>(95% UI)       |                           | Age-standardized estimates per 100,000<br>(95% UI) |                     | Percentage change of age-standardized<br>estimates (95% UI) |
|              | (Year 1990)               | (Year 2019)               | (Year 1990)                                        | (Year 2019)         | (Year 1990–Year 2019)                                       |
| Serbia       | 127430 (121821 to 133686) | 131249 (125348 to 138035) | 1187 (1134 to 1245)                                | 1135 (1080 to 1195) | -4.3% (-7.0% to -1.2%)                                      |
| Slovakia     | 81811 (78231 to 85769)    | 100130 (95678 to 105347)  | 1444 (1379 to 1514)                                | 1351 (1290 to 1415) | -6.4% (-8.0% to -4.6%)                                      |
| Slovenia     | 40908 (39030 to 42872)    | 47458 (45204 to 49694)    | 1797 (1713 to 1884)                                | 1521 (1448 to 1595) | -15.3% (-17.2% to -13.1%)                                   |
| Central Asia | 406473 (388360 to 426724) | 592593 (564520 to 622301) | 704 (674 to 739)                                   | 650 (621 to 682)    | -7.7% (-8.9% to -6.6%)                                      |
| Armenia      | 35694 (30551 to 43742)    | 26341 (23832 to 30265)    | 1101 (950 to 1342)                                 | 724 (655 to 830)    | -34.2% (-38.8% to -30%)                                     |
| Azerbaijan   | 38686 (36987 to 40640)    | 62368 (59069 to 65715)    | 611 (585 to 642)                                   | 553 (524 to 581)    | -9.5% (-11.7% to -7.0%)                                     |
| Georgia      | 46220 (43961 to 48652)    | 38008 (36181 to 39921)    | 777 (739 to 818)                                   | 827 (787 to 868)    | 6.5% (4.3% to 8.8%)                                         |
| Kazakhstan   | 120024 (114297 to 126084) | 149753 (142403 to 157250) | 797 (759 to 836)                                   | 784 (748 to 823)    | -1.5% (-3.2% to 0.1%)                                       |
| Kyrgyzstan   | 25831 (24723 to 27104)    | 35868 (34193 to 37595)    | 715 (684 to 751)                                   | 609 (581 to 639)    | -14.9% (-16.6% to -13.3%)                                   |
| Mongolia     | 9143 (8717 to 9577)       | 24286 (23110 to 25572)    | 594 (568 to 624)                                   | 734 (702 to 772)    | 23.5% (21.5% to 25.7%)                                      |
| Tajikistan   | 23820 (22738 to 25109)    | 43353 (40216 to 47274)    | 633 (605 to 667)                                   | 542 (504 to 590)    | -14.5% (-19.0% to -7.9%)                                    |
| Turkmenistan | 15354 (14621 to 16120)    | 25771 (24602 to 27050)    | 557 (532 to 583)                                   | 524 (502 to 549)    | -5.8% (-7.8% to -3.8%)                                      |

| Location                           | Prevalence                   |                              |                                                    |                  |                                                             |
|------------------------------------|------------------------------|------------------------------|----------------------------------------------------|------------------|-------------------------------------------------------------|
|                                    | Numbers<br>(95% UI)          |                              | Age-standardized estimates per 100,000<br>(95% UI) |                  | Percentage change of age-standardized<br>estimates (95% UI) |
|                                    | (Year 1990)                  | (Year 2019)                  | (Year 1990)                                        | (Year 2019)      | (Year 1990–Year 2019)                                       |
| Uzbekistan                         | 91701 (87543 to 96282)       | 186844 (177804 to 196282)    | 592 (566 to 622)                                   | 597 (570 to 626) | 0.7% (-0.9% to 2.5%)                                        |
| <b>Latin America and Caribbean</b> | 1408278 (1346293 to 1483754) | 2607065 (2504148 to 2726076) | 463 (445 to 486)                                   | 430 (413 to 450) | -7.1% (-8.6% to -5.6%)                                      |
| <b>Central Latin America</b>       | 709801 (672148 to 755684)    | 1257961 (1206027 to 1317005) | 579 (552 to 611)                                   | 502 (482 to 526) | -13.2% (-14.9% to -11.9%)                                   |
| Colombia                           | 211177 (199918 to 223864)    | 332994 (319128 to 348824)    | 823 (782 to 866)                                   | 648 (620 to 679) | -21.3% (-23.3% to -19.4%)                                   |
| Costa Rica                         | 13910 (13318 to 14642)       | 31385 (30134 to 32937)       | 595 (571 to 624)                                   | 615 (590 to 645) | 3.4% (1.6% to 5.2%)                                         |
| El Salvador                        | 34989 (28041 to 46601)       | 42703 (39065 to 48120)       | 835 (688 to 1079)                                  | 704 (642 to 796) | -15.8% (-26.7% to -5.9%)                                    |
| Guatemala                          | 32528 (28357 to 39768)       | 81261 (76894 to 87161)       | 571 (507 to 676)                                   | 566 (535 to 610) | -0.8% (-10.9% to 6.7%)                                      |
| Honduras                           | 16208 (15518 to 17034)       | 43820 (41768 to 45816)       | 510 (492 to 532)                                   | 544 (520 to 567) | 6.6% (4.5% to 8.9%)                                         |
| Mexico                             | 273095 (259200 to 289310)    | 480897 (459524 to 507789)    | 441 (421 to 464)                                   | 383 (366 to 404) | -13.1% (-14.1% to -12%)                                     |
| Nicaragua                          | 19374 (14550 to 27939)       | 30687 (27244 to 36377)       | 696 (552 to 951)                                   | 548 (485 to 655) | -21.3% (-31.8% to -11.8%)                                   |
| Panama                             | 11198 (10639 to 11926)       | 23078 (22046 to 24233)       | 578 (551 to 611)                                   | 551 (526 to 578) | -4.6% (-7.1% to -2.7%)                                      |
| Venezuela (Bolivarian Republic of) | 97324 (93032 to 102354)      | 191135 (183441 to 199635)    | 670 (643 to 699)                                   | 644 (618 to 672) | -3.9% (-6.2% to -2.2%)                                      |

| Location                         | Prevalence                |                           |                                                    |                  |                                                             |
|----------------------------------|---------------------------|---------------------------|----------------------------------------------------|------------------|-------------------------------------------------------------|
|                                  | Numbers<br>(95% UI)       |                           | Age-standardized estimates per 100,000<br>(95% UI) |                  | Percentage change of age-standardized<br>estimates (95% UI) |
|                                  | (Year 1990)               | (Year 2019)               | (Year 1990)                                        | (Year 2019)      | (Year 1990–Year 2019)                                       |
| <b>Andean Latin America</b>      | 115610 (109587 to 123199) | 258082 (247394 to 269334) | 402 (384 to 424)                                   | 425 (408 to 443) | 5.6% (2.9% to 8.2%)                                         |
| Bolivia (Plurinational State of) | 16725 (16072 to 17429)    | 38426 (36793 to 40095)    | 362 (348 to 375)                                   | 368 (353 to 383) | 1.8% (-0.1% to 3.7%)                                        |
| Ecuador                          | 33356 (31684 to 35275)    | 81011 (77741 to 84639)    | 448 (428 to 469)                                   | 489 (469 to 511) | 9.3% (6.5% to 11.9%)                                        |
| Peru                             | 65529 (61055 to 71465)    | 138644 (132302 to 145836) | 393 (371 to 423)                                   | 411 (393 to 432) | 4.5% (0.5% to 8.1%)                                         |
| <b>Caribbean</b>                 | 152940 (146922 to 159299) | 279129 (266795 to 292459) | 506 (487 to 526)                                   | 555 (531 to 582) | 9.8% (7.1% to 13.5%)                                        |
| Antigua and Barbuda              | 247 (237 to 257)          | 490 (471 to 510)          | 447 (429 to 465)                                   | 483 (464 to 502) | 7.9% (6.0% to 9.8%)                                         |
| Bahamas                          | 1046 (1001 to 1095)       | 2096 (2015 to 2181)       | 484 (464 to 504)                                   | 504 (486 to 525) | 4.3% (2.5% to 6.4%)                                         |
| Barbados                         | 1117 (1071 to 1164)       | 1720 (1657 to 1783)       | 428 (410 to 446)                                   | 447 (430 to 464) | 4.5% (2.3% to 6.8%)                                         |
| Belize                           | 635 (607 to 666)          | 2005 (1923 to 2094)       | 489 (469 to 511)                                   | 556 (535 to 578) | 13.6% (11.2% to 15.9%)                                      |
| Bermuda                          | 247 (233 to 263)          | 320 (305 to 338)          | 374 (353 to 397)                                   | 354 (336 to 374) | -5.4% (-7.8% to -3.1%)                                      |
| Cuba                             | 68303 (65366 to 71259)    | 101107 (96780 to 105693)  | 634 (607 to 661)                                   | 638 (611 to 666) | 0.6% (-2.0% to 3.6%)                                        |
| Dominica                         | 283 (271 to 296)          | 376 (362 to 392)          | 429 (410 to 449)                                   | 477 (458 to 498) | 11.2% (8.8% to 13.4%)                                       |
| Dominican Republic               | 24962 (23821 to 26120)    | 63528 (60735 to 66628)    | 468 (448 to 489)                                   | 609 (582 to 638) | 30.1% (27.6% to 32.9%)                                      |
| Grenada                          | 309 (290 to 336)          | 546 (524 to 567)          | 434 (408 to 468)                                   | 483 (464 to 502) | 11.4% (4.8% to 16.2%)                                       |
| Guyana                           | 2534 (2438 to 2643)       | 3823 (3675 to 3970)       | 432 (417 to 449)                                   | 519 (500 to 539) | 20.1% (18.2% to 22.0%)                                      |
| Haiti                            | 18158 (17342 to 18909)    | 50055 (44426 to 58034)    | 385 (370 to 399)                                   | 481 (431 to 553) | 25.0% (13.1% to 42.9%)                                      |



| Location                                      | Prevalence                   |                               |                                                    |                  |                                                             |
|-----------------------------------------------|------------------------------|-------------------------------|----------------------------------------------------|------------------|-------------------------------------------------------------|
|                                               | Numbers<br>(95% UI)          |                               | Age-standardized estimates per 100,000<br>(95% UI) |                  | Percentage change of age-standardized<br>estimates (95% UI) |
|                                               | (Year 1990)                  | (Year 2019)                   | (Year 1990)                                        | (Year 2019)      | (Year 1990–Year 2019)                                       |
|                                               |                              |                               |                                                    |                  |                                                             |
| Jamaica                                       | 7934 (7592 to 8241)          | 12653 (12159 to 13124)        | 401 (385 to 416)                                   | 423 (406 to 438) | 5.3% (3.7% to 7.2%)                                         |
| Puerto Rico                                   | 14884 (14164 to 15663)       | 17797 (16960 to 18675)        | 412 (392 to 434)                                   | 365 (346 to 386) | -11.3% (-13.6% to -8.3%)                                    |
| Saint Kitts and Nevis                         | 120 (114 to 126)             | 243 (232 to 255)              | 338 (322 to 357)                                   | 356 (340 to 375) | 8.4% (6.3% to 10.5%)                                        |
| Saint Lucia                                   | 485 (464 to 507)             | 1014 (975 to 1054)            | 455 (436 to 475)                                   | 493 (474 to 513) | 5.3% (3.3% to 7.4%)                                         |
| Saint Vincent and the Grenadines              | 345 (331 to 360)             | 574 (553 to 596)              | 404 (388 to 421)                                   | 450 (433 to 467) | 11.3% (8.9% to 13.5%)                                       |
| Suriname                                      | 1490 (1402 to 1660)          | 2945 (2826 to 3100)           | 455 (430 to 498)                                   | 483 (464 to 508) | 6.3% (0.5% to 9.4%)                                         |
| Trinidad and Tobago                           | 4345 (4165 to 4545)          | 7914 (7613 to 8241)           | 417 (401 to 435)                                   | 475 (456 to 494) | 13.9% (11.3% to 16.0%)                                      |
| United States Virgin Islands                  | 400 (379 to 422)             | 466 (447 to 489)              | 392 (372 to 413)                                   | 340 (325 to 358) | -13.4% (-15.2% to -11.7%)                                   |
| <b>Tropical Latin America</b>                 | 429926 (410516 to 454470)    | 811893 (772237 to 859923)     | 353 (337 to 371)                                   | 330 (314 to 350) | -6.3% (-9.1% to -3.4%)                                      |
| Brazil                                        | 414928 (396357 to 438869)    | 777443 (739279 to 824188)     | 349 (334 to 368)                                   | 325 (309 to 344) | -6.9% (-9.8% to -4.0%)                                      |
| Paraguay                                      | 14998 (14296 to 15823)       | 34450 (32770 to 36316)        | 503 (480 to 528)                                   | 532 (507 to 560) | 5.9% (3.6% to 8.1%)                                         |
| <b>Southeast Asia, East Asia, and Oceania</b> | 3869502 (3689053 to 4094076) | 9786362 (9269215 to 10368135) | 271 (259 to 286)                                   | 371 (353 to 393) | 37.1% (35.1% to 39.4%)                                      |
| <b>East Asia</b>                              | 2330447 (2212990 to 2468532) | 6771606 (6392908 to 7230198)  | 219 (209 to 232)                                   | 342 (324 to 365) | 56.1% (53.2% to 59.4%)                                      |
| China                                         | 2187277 (2073352 to 2318836) | 6546436 (6173879 to 6994611)  | 213 (202 to 226)                                   | 342 (324 to 365) | 60.6% (57.5% to 64.1%)                                      |
| Democratic People's Republic of Korea         | 55706 (53312 to 58390)       | 97855 (93379 to 103039)       | 292 (281 to 306)                                   | 309 (294 to 325) | 5.5% (3.0% to 7.8%)                                         |

1  
2  
3  
4  
5  
6  
7  
8  
9  
10  
11  
12  
13  
14  
15  
16  
17  
18  
19  
20  
21  
22  
23  
24  
25  
26  
27  
28  
29  
30  
31  
32  
33  
34  
35  
36  
37  
38  
39  
40  
41  
42  
43  
44  
45  
46

| Location                         | Prevalence                   |                              |                                                    |                  |                                                             |
|----------------------------------|------------------------------|------------------------------|----------------------------------------------------|------------------|-------------------------------------------------------------|
|                                  | Numbers<br>(95% UI)          |                              | Age-standardized estimates per 100,000<br>(95% UI) |                  | Percentage change of age-standardized<br>estimates (95% UI) |
|                                  | (Year 1990)                  | (Year 2019)                  | (Year 1990)                                        | (Year 2019)      | (Year 1990–Year 2019)                                       |
| Taiwan (Province of China)       | 87464 (83846 to 91581)       | 127315 (121795 to 133575)    | 473 (454 to 494)                                   | 367 (352 to 385) | -22.3% (-24.8% to -19.9%)                                   |
| <b>Southeast Asia</b>            | 1524028 (1446391 to 1621291) | 2973675 (2820825 to 3144016) | 430 (410 to 455)                                   | 438 (415 to 462) | 1.8% (-0.3% to 4.1%)                                        |
| Cambodia                         | 33642 (26316 to 51550)       | 71251 (65198 to 82969)       | 468 (385 to 672)                                   | 496 (454 to 580) | 6.2% (-14.0% to 19.6%)                                      |
| Indonesia                        | 476448 (448580 to 509803)    | 782493 (732623 to 837497)    | 337 (318 to 359)                                   | 304 (285 to 324) | -10.0% (-12.3% to -7.0%)                                    |
| Lao People's Democratic Republic | 12303 (11719 to 12991)       | 25230 (24033 to 26580)       | 420 (401 to 441)                                   | 423 (404 to 444) | 0.7% (-1.6% to 2.6%)                                        |
| Malaysia                         | 68021 (64781 to 71801)       | 174373 (166587 to 183447)    | 516 (493 to 543)                                   | 569 (545 to 597) | 10.3% (8.4% to 12.1%)                                       |
| Maldives                         | 495 (474 to 519)             | 1892 (1791 to 2003)          | 360 (345 to 377)                                   | 404 (385 to 425) | 12.2% (8.9% to 16.2%)                                       |
| Mauritius                        | 2677 (2549 to 2837)          | 5050 (4786 to 5334)          | 279 (267 to 296)                                   | 315 (299 to 333) | 12.7% (10.1% to 15.3%)                                      |
| Myanmar                          | 139640 (130748 to 156551)    | 258019 (234542 to 289681)    | 439 (414 to 483)                                   | 488 (446 to 545) | 11.1% (3.4% to 22.5%)                                       |
| Philippines                      | 206438 (194169 to 221200)    | 428823 (406562 to 454093)    | 462 (437 to 491)                                   | 442 (420 to 467) | -4.3% (-6.4% to -2.6%)                                      |
| Seychelles                       | 188 (179 to 199)             | 392 (371 to 416)             | 304 (289 to 321)                                   | 336 (319 to 356) | 10.7% (8.3% to 13.0%)                                       |
| Sri Lanka                        | 72464 (66989 to 80208)       | 145897 (132466 to 165436)    | 502 (468 to 546)                                   | 597 (542 to 678) | 19.1% (12.1% to 28.6%)                                      |
| Thailand                         | 283957 (270592 to 299599)    | 476782 (454192 to 501115)    | 586 (559 to 616)                                   | 511 (488 to 538) | -12.8% (-14.5% to -11%)                                     |
| Timor-Leste                      | 2800 (2173 to 3731)          | 4998 (4249 to 6138)          | 486 (398 to 619)                                   | 510 (431 to 630) | 5.0% (0.4% to 9.4%)                                         |

| Location                         | Prevalence             |                           |                                                    |                  |                                                             |
|----------------------------------|------------------------|---------------------------|----------------------------------------------------|------------------|-------------------------------------------------------------|
|                                  | Numbers<br>(95% UI)    |                           | Age-standardized estimates per 100,000<br>(95% UI) |                  | Percentage change of age-standardized<br>estimates (95% UI) |
|                                  | (Year 1990)            | (Year 2019)               | (Year 1990)                                        | (Year 2019)      | (Year 1990–Year 2019)                                       |
|                                  | Viet Nam               | 222930 (213114 to 233910) | 594579 (567714 to 624209)                          | 450 (431 to 472) | 579 (555 to 607)                                            |
| <b>Oceania</b>                   | 15027 (14382 to 15767) | 41081 (38963 to 43478)    | 338 (324 to 353)                                   | 406 (386 to 428) | 20.1% (17.6% to 23.8%)                                      |
| American Samoa                   | 93 (88 to 99)          | 145 (133 to 158)          | 278 (263 to 295)                                   | 277 (255 to 303) | 0.0% (-5.3% to 8.4%)                                        |
| Cook Islands                     | 53 (50 to 56)          | 66 (63 to 71)             | 344 (326 to 367)                                   | 306 (290 to 325) | -11.1% (-12.6% to -9.6%)                                    |
| Fiji                             | 1706 (1629 to 1798)    | 2753 (2628 to 2897)       | 295 (283 to 310)                                   | 313 (299 to 329) | 6.1% (4.2% to 8.2%)                                         |
| Guam                             | 346 (327 to 367)       | 507 (481 to 536)          | 312 (297 to 331)                                   | 277 (263 to 293) | -11.2% (-12.8% to -9.7%)                                    |
| Kiribati                         | 130 (124 to 136)       | 243 (231 to 256)          | 233 (223 to 245)                                   | 247 (236 to 259) | 5.7% (3.2% to 8.1%)                                         |
| Marshall Islands                 | 90 (86 to 95)          | 170 (162 to 179)          | 338 (323 to 356)                                   | 353 (338 to 371) | 4.4% (2.8% to 5.9%)                                         |
| Micronesia (Federated States of) | 229 (218 to 241)       | 329 (312 to 349)          | 339 (324 to 358)                                   | 369 (351 to 389) | 8.7% (6.2% to 11.6%)                                        |
| Nauru                            | 19 (18 to 21)          | 22 (21 to 23)             | 290 (275 to 309)                                   | 289 (274 to 307) | -0.5% (-1.8% to 0.8%)                                       |
| Niue                             | 6 (5 to 6)             | 5 (5 to 6)                | 265 (251 to 281)                                   | 278 (261 to 297) | 5.1% (1.9% to 9.5%)                                         |
| Northern Mariana Islands         | 132 (124 to 142)       | 160 (152 to 170)          | 377 (358 to 402)                                   | 305 (290 to 322) | -19% (-21% to -17.2%)                                       |
| Palau                            | 40 (38 to 43)          | 73 (69 to 78)             | 320 (303 to 338)                                   | 332 (314 to 351) | 3.9% (2.1% to 5.5%)                                         |
| Papua New Guinea                 | 9638 (9217 to 10099)   | 30861 (29214 to 32771)    | 350 (335 to 366)                                   | 432 (410 to 456) | 23.5% (20.6% to 27.7%)                                      |
| Samoa                            | 413 (393 to 435)       | 772 (719 to 838)          | 361 (344 to 381)                                   | 439 (411 to 474) | 21.7% (16.2% to 30.1%)                                      |
| Solomon Islands                  | 756 (720 to 795)       | 1914 (1818 to 2024)       | 366 (350 to 384)                                   | 411 (392 to 433) | 12.4% (10.1% to 15%)                                        |
| Tokelau                          | 3 (3 to 3)             | 3 (3 to 4)                | 240 (227 to 255)                                   | 255 (241 to 271) | 6.4% (5.1% to 7.8%)                                         |
| Tonga                            | 217 (207 to 230)       | 277 (264 to 290)          | 315 (301 to 332)                                   | 317 (303 to 333) | 0.6% (-2.1% to 3.1%)                                        |
| Tuvalu                           | 19 (18 to 20)          | 28 (27 to 30)             | 239 (226 to 255)                                   | 256 (241 to 273) | 16.6% (12.9% to 21.9%)                                      |
| Vanuatu                          | 306 (292 to 322)       | 812 (766 to 870)          | 304 (290 to 320)                                   | 354 (334 to 377) | 6.7% (5.2% to 8.3%)                                         |

1  
2  
3  
4  
5  
6  
7  
8  
9  
10  
11  
12  
13  
14  
15  
16  
17  
18  
19  
20  
21  
22  
23  
24  
25  
26  
27  
28  
29  
30  
31  
32  
33  
34  
35  
36  
37  
38  
39  
40  
41  
42  
43  
44  
45  
46

| Location                     | Prevalence                   |                              |                                                    |                   |                                                             |
|------------------------------|------------------------------|------------------------------|----------------------------------------------------|-------------------|-------------------------------------------------------------|
|                              | Numbers<br>(95% UI)          |                              | Age-standardized estimates per 100,000<br>(95% UI) |                   | Percentage change of age-standardized<br>estimates (95% UI) |
|                              | (Year 1990)                  | (Year 2019)                  | (Year 1990)                                        | (Year 2019)       | (Year 1990–Year 2019)                                       |
| North Africa and Middle East | 1361137 (1227870 to 1581514) | 3096882 (2843657 to 3481267) | 539 (490 to 621)                                   | 552 (507 to 619)  | 2.4% (-3.3% to 5.7%)                                        |
| North Africa and Middle East | 1361137 (1227870 to 1581514) | 3096882 (2843657 to 3481267) | 539 (490 to 621)                                   | 552 (507 to 619)  | 2.4% (-3.3% to 5.7%)                                        |
| Afghanistan                  | 86158 (38145 to 226063)      | 182536 (119628 to 305576)    | 944 (440 to 2344)                                  | 775 (486 to 1367) | -17.9% (-42.8% to 24.8%)                                    |
| Algeria                      | 98764 (93969 to 103896)      | 202606 (192787 to 214115)    | 557 (533 to 584)                                   | 503 (480 to 530)  | -9.8% (-12.0% to -7.0%)                                     |
| Bahrain                      | 1947 (1848 to 2051)          | 8331 (7910 to 8808)          | 467 (447 to 489)                                   | 487 (465 to 512)  | 4.2% (1.5% to 7.2%)                                         |
| Egypt                        | 161672 (154186 to 169480)    | 337571 (322203 to 354072)    | 380 (365 to 397)                                   | 397 (379 to 415)  | 4.3% (1.7% to 7.0%)                                         |
| Iran (Islamic Republic of)   | 304254 (271636 to 352096)    | 478928 (445665 to 520699)    | 757 (673 to 887)                                   | 550 (513 to 595)  | -27.4% (-34.4% to -22.2%)                                   |
| Iraq                         | 112013 (81392 to 162656)     | 261206 (207437 to 347346)    | 958 (692 to 1410)                                  | 750 (597 to 996)  | -21.7% (-31.2% to -12.7%)                                   |
| Jordan                       | 10142 (9672 to 10621)        | 39421 (37539 to 41373)       | 418 (401 to 436)                                   | 403 (386 to 422)  | -3.6% (-5.7% to -1.6%)                                      |
| Kuwait                       | 8810 (8126 to 9769)          | 24948 (23651 to 26471)       | 622 (583 to 672)                                   | 550 (524 to 579)  | -11.6% (-17.4% to -7.7%)                                    |
| Lebanon                      | 21210 (15217 to 33977)       | 28045 (23771 to 37081)       | 765 (556 to 1213)                                  | 528 (447 to 700)  | -30.9% (-42.9% to -19.1%)                                   |
| Libya                        | 15766 (14915 to 16737)       | 43130 (39583 to 47930)       | 562 (536 to 595)                                   | 627 (579 to 694)  | 11.6% (5.9% to 19.3%)                                       |

| Location             | Prevalence                   |                                 |                                                    |                     |                                                             |
|----------------------|------------------------------|---------------------------------|----------------------------------------------------|---------------------|-------------------------------------------------------------|
|                      | Numbers<br>(95% UI)          |                                 | Age-standardized estimates per 100,000<br>(95% UI) |                     | Percentage change of age-standardized<br>estimates (95% UI) |
|                      | (Year 1990)                  | (Year 2019)                     | (Year 1990)                                        | (Year 2019)         | (Year 1990–Year 2019)                                       |
|                      | Morocco                      | 94093 (89709 to 98896)          | 179475 (171427 to 188308)                          | 489 (468 to 512)    | 503 (481 to 528)                                            |
| Oman                 | 9477 (8971 to 10027)         | 28135 (26674 to 29779)          | 715 (680 to 753)                                   | 679 (649 to 713)    | -5.0% (-7.1% to -3.1%)                                      |
| Palestine            | 8972 (6670 to 12759)         | 26166 (19893 to 36241)          | 616 (478 to 842)                                   | 688 (527 to 948)    | 11.7% (4.9% to 17.8%)                                       |
| Qatar                | 2872 (2716 to 3037)          | 18974 (17875 to 20194)          | 735 (702 to 772)                                   | 664 (632 to 701)    | -9.7% (-11.8% to -7.3%)                                     |
| Saudi Arabia         | 89712 (84748 to 94811)       | 369775 (344765 to 397295)       | 853 (813 to 899)                                   | 1071 (1008 to 1140) | 25.5% (22.3% to 28.3%)                                      |
| Sudan                | 35193 (31486 to 41234)       | 76842 (69587 to 87305)          | 255 (235 to 287)                                   | 268 (244 to 304)    | 5.2% (0.6% to 10.1%)                                        |
| Syrian Arab Republic | 32418 (29591 to 37968)       | 111858 (77475 to 171069)        | 382 (353 to 436)                                   | 834 (566 to 1291)   | 118.2% (55.8% to 220.8%)                                    |
| Tunisia              | 31239 (29906 to 32701)       | 63641 (60813 to 66654)          | 477 (458 to 498)                                   | 496 (474 to 519)    | 4.0% (1.9% to 6.4%)                                         |
| Turkey               | 189610 (181971 to 197914)    | 428134 (407264 to 451661)       | 394 (379 to 411)                                   | 471 (449 to 496)    | 19.6% (16.1% to 24.1%)                                      |
| United Arab Emirates | 9350 (8869 to 9857)          | 66292 (62592 to 70302)          | 621 (594 to 649)                                   | 594 (567 to 624)    | -4.4% (-6.7% to -2.6%)                                      |
| Yemen                | 36551 (34139 to 39589)       | 117721 (101299 to 141736)       | 441 (417 to 470)                                   | 525 (456 to 626)    | 18.9% (7.1% to 35.6%)                                       |
| South Asia           | 5841505 (5539892 to 6167668) | 14952502 (14136245 to 15831814) | 750 (714 to 791)                                   | 932 (881 to 986)    | 24.2% (22.8% to 25.6%)                                      |

1  
2  
3  
4  
5  
6  
7  
8  
9  
10  
11  
12  
13  
14  
15  
16  
17  
18  
19  
20  
21  
22  
23  
24  
25  
26  
27  
28  
29  
30  
31  
32  
33  
34  
35  
36  
37  
38  
39  
40  
41  
42  
43  
44  
45  
46

| Location                           | Prevalence                   |                                 |                                                    |                    |                                                             |
|------------------------------------|------------------------------|---------------------------------|----------------------------------------------------|--------------------|-------------------------------------------------------------|
|                                    | Numbers<br>(95% UI)          |                                 | Age-standardized estimates per 100,000<br>(95% UI) |                    | Percentage change of age-standardized<br>estimates (95% UI) |
|                                    | (Year 1990)                  | (Year 2019)                     | (Year 1990)                                        | (Year 2019)        | (Year 1990–Year 2019)                                       |
| <b>South Asia</b>                  | 5841505 (5539892 to 6167668) | 14952502 (14136245 to 15831814) | 750 (714 to 791)                                   | 932 (881 to 986)   | 24.2% (22.8% to 25.6%)                                      |
| Bangladesh                         | 359155 (336447 to 380719)    | 924863 (871564 to 977129)       | 506 (477 to 536)                                   | 616 (581 to 651)   | 21.8% (19.0% to 24.2%)                                      |
| Bhutan                             | 2432 (2303 to 2574)          | 5406 (5119 to 5727)             | 615 (585 to 648)                                   | 791 (752 to 835)   | 28.7% (26.2% to 31.0%)                                      |
| India                              | 5052191 (4789672 to 5335687) | 12795681 (12085618 to 13557100) | 818 (778 to 863)                                   | 1002 (947 to 1060) | 22.4% (21.0% to 23.9%)                                      |
| Nepal                              | 74046 (70671 to 78019)       | 176164 (167511 to 186265)       | 559 (535 to 587)                                   | 673 (641 to 708)   | 20.4% (17.3% to 24.2%)                                      |
| Pakistan                           | 353682 (335994 to 374052)    | 1050389 (989822 to 1114093)     | 480 (457 to 508)                                   | 652 (617 to 692)   | 36.0% (33.6% to 38.9%)                                      |
| <b>Sub-Saharan Africa</b>          | 1206309 (1113585 to 1334495) | 2643504 (2466427 to 2859292)    | 383 (360 to 415)                                   | 385 (361 to 415)   | 0.4% (-2.0% to 2.0%)                                        |
| <b>Southern Sub-Saharan Africa</b> | 133543 (125403 to 142989)    | 194888 (183354 to 208477)       | 364 (342 to 391)                                   | 286 (270 to 306)   | -21.4% (-22.7% to -20.1%)                                   |
| Botswana                           | 2051 (1932 to 2183)          | 5731 (5393 to 6094)             | 242 (229 to 256)                                   | 292 (276 to 310)   | 20.6% (18.7% to 22.7%)                                      |
| Eswatini                           | 1172 (1107 to 1245)          | 2307 (2179 to 2452)             | 252 (239 to 267)                                   | 274 (260 to 292)   | 8.9% (7.2% to 10.8%)                                        |
| Lesotho                            | 2806 (2651 to 2978)          | 4746 (4474 to 5042)             | 220 (209 to 232)                                   | 279 (264 to 296)   | 26.8% (24.6% to 29.4%)                                      |
| Namibia                            | 3194 (2831 to 3755)          | 6029 (5640 to 6500)             | 332 (299 to 379)                                   | 328 (307 to 354)   | -1.2% (-8.6% to 4.2%)                                       |
| South Africa                       | 110769 (103753 to 118832)    | 154867 (145551 to 165941)       | 406 (380 to 437)                                   | 298 (281 to 320)   | -26.5% (-28.0% to -25.1%)                                   |
| Zimbabwe                           | 13552 (12817 to 14370)       | 21208 (20122 to 22513)          | 229 (217 to 242)                                   | 210 (200 to 222)   | -8.3% (-10.1% to -6.6%)                                     |

| Location      | Prevalence                        |                           |                                                    |                  |                                                             |
|---------------|-----------------------------------|---------------------------|----------------------------------------------------|------------------|-------------------------------------------------------------|
|               | Numbers<br>(95% UI)               |                           | Age-standardized estimates per 100,000<br>(95% UI) |                  | Percentage change of age-standardized<br>estimates (95% UI) |
|               | (Year 1990)                       | (Year 2019)               | (Year 1990)                                        | (Year 2019)      | (Year 1990–Year 2019)                                       |
|               | <b>Western Sub-Saharan Africa</b> | 393643 (371506 to 417915) | 1015292 (956643 to 1081707)                        | 330 (311 to 350) | 369 (348 to 392)                                            |
| Benin         | 9598 (9087 to 10182)              | 27620 (26060 to 29366)    | 353 (334 to 374)                                   | 380 (359 to 403) | 7.9% (6.3% to 9.8%)                                         |
| Burkina Faso  | 18263 (17286 to 19378)            | 53183 (50128 to 56778)    | 328 (311 to 348)                                   | 405 (382 to 429) | 23.4% (21.6% to 25.3%)                                      |
| Cabo Verde    | 710 (674 to 749)                  | 1773 (1679 to 1885)       | 290 (276 to 307)                                   | 354 (337 to 376) | 22.3% (20.8% to 24.0%)                                      |
| Cameroon      | 26104 (24567 to 27826)            | 81374 (76604 to 86776)    | 422 (400 to 449)                                   | 452 (427 to 482) | 7.1% (5.3% to 9.0%)                                         |
| Chad          | 12524 (11163 to 14614)            | 33024 (30732 to 35901)    | 335 (305 to 379)                                   | 392 (366 to 424) | 17.2% (10.9% to 21.6%)                                      |
| Côte d'Ivoire | 24357 (22908 to 25937)            | 62791 (59003 to 66694)    | 368 (348 to 389)                                   | 383 (362 to 405) | 4.0% (2.4% to 5.8%)                                         |
| Gambia        | 1701 (1591 to 1821)               | 4441 (4183 to 4719)       | 309 (291 to 328)                                   | 325 (308 to 345) | 5.4% (3.1% to 7.5%)                                         |
| Ghana         | 34864 (32489 to 37234)            | 105387 (98549 to 112825)  | 378 (353 to 402)                                   | 459 (430 to 490) | 21.6% (19.5% to 23.4%)                                      |
| Guinea        | 13474 (12693 to 14282)            | 29370 (27691 to 31229)    | 331 (313 to 351)                                   | 388 (366 to 412) | 17.1% (15.3% to 18.8%)                                      |
| Guinea-Bissau | 2499 (2342 to 2669)               | 5186 (4841 to 5555)       | 412 (387 to 438)                                   | 435 (408 to 465) | 5.7% (3.9% to 8.0%)                                         |
| Liberia       | 5776 (4553 to 8368)               | 11219 (9845 to 13311)     | 390 (327 to 518)                                   | 356 (316 to 417) | -8.6% (-24.3% to 2.7%)                                      |
| Mali          | 17615 (16574 to 18798)            | 45061 (41639 to 49459)    | 326 (307 to 345)                                   | 366 (341 to 396) | 12.3% (8.3% to 19.1%)                                       |
| Mauritania    | 6379 (5995 to 6774)               | 12375 (11593 to 13199)    | 485 (457 to 517)                                   | 455 (426 to 485) | -6.3% (-7.6% to -5.0%)                                      |

1  
2  
3  
4  
5  
6  
7  
8  
9  
10  
11  
12  
13  
14  
15  
16  
17  
18  
19  
20  
21  
22  
23  
24  
25  
26  
27  
28  
29  
30  
31  
32  
33  
34  
35  
36  
37  
38  
39  
40  
41  
42  
43  
44  
45  
46

| Location                          | Prevalence                |                              |                                                    |                   |                                                             |
|-----------------------------------|---------------------------|------------------------------|----------------------------------------------------|-------------------|-------------------------------------------------------------|
|                                   | Numbers<br>(95% UI)       |                              | Age-standardized estimates per 100,000<br>(95% UI) |                   | Percentage change of age-standardized<br>estimates (95% UI) |
|                                   | (Year 1990)               | (Year 2019)                  | (Year 1990)                                        | (Year 2019)       | (Year 1990–Year 2019)                                       |
| Niger                             | 13834 (13043 to 14730)    | 39131 (36861 to 41586)       | 317 (301 to 336)                                   | 333 (316 to 353)  | 5.0% (3.6% to 6.5%)                                         |
| Nigeria                           | 175736 (165268 to 186733) | 424532 (399558 to 453038)    | 303 (286 to 321)                                   | 333 (315 to 354)  | 10.1% (8.7% to 12.1%)                                       |
| Sao Tome and Principe             | 249 (236 to 263)          | 566 (532 to 600)             | 320 (303 to 339)                                   | 388 (366 to 412)  | 21.5% (19.6% to 23.4%)                                      |
| Senegal                           | 14364 (13478 to 15318)    | 34930 (32773 to 37093)       | 324 (305 to 344)                                   | 353 (331 to 374)  | 8.8% (7.1% to 10.5%)                                        |
| Sierra Leone                      | 7733 (7320 to 8213)       | 21506 (19609 to 24323)       | 320 (303 to 339)                                   | 407 (375 to 455)  | 27.4% (19.7% to 40.9%)                                      |
| Togo                              | 7849 (7353 to 8389)       | 21809 (20468 to 23233)       | 381 (357 to 404)                                   | 395 (372 to 420)  | 3.9% (2.6% to 5.3%)                                         |
| <b>Eastern Sub-Saharan Africa</b> | 546626 (484496 to 643421) | 1094872 (1008201 to 1210322) | 451 (413 to 505)                                   | 428 (397 to 471)  | -5.0% (-10.1% to -2.1%)                                     |
| Burundi                           | 16000 (15197 to 16889)    | 60908 (45647 to 85359)       | 459 (438 to 483)                                   | 789 (603 to 1086) | 71.9% (31.1% to 140.3%)                                     |
| Comoros                           | 1424 (1339 to 1511)       | 2971 (2793 to 3151)          | 479 (452 to 507)                                   | 499 (470 to 528)  | 4.2% (2.7% to 5.6%)                                         |
| Djibouti                          | 1146 (1071 to 1236)       | 3775 (3543 to 4045)          | 412 (388 to 438)                                   | 416 (392 to 443)  | 1.0% (-1.2% to 3.2%)                                        |
| Eritrea                           | 17672 (10227 to 30705)    | 23159 (18819 to 30609)       | 775 (498 to 1256)                                  | 538 (430 to 725)  | -30.5% (-44.6% to -12.2%)                                   |
| Ethiopia                          | 205144 (172013 to 260669) | 312469 (285987 to 352276)    | 593 (526 to 692)                                   | 480 (441 to 539)  | -19.0% (-28.0% to -12.5%)                                   |
| Kenya                             | 54192 (51282 to 57168)    | 148313 (140229 to 156661)    | 419 (399 to 441)                                   | 437 (416 to 461)  | 4.4% (3.5% to 5.6%)                                         |



| Location                    | Prevalence                |                           |                                                    |                  |                                                             |
|-----------------------------|---------------------------|---------------------------|----------------------------------------------------|------------------|-------------------------------------------------------------|
|                             | Numbers<br>(95% UI)       |                           | Age-standardized estimates per 100,000<br>(95% UI) |                  | Percentage change of age-standardized<br>estimates (95% UI) |
|                             | (Year 1990)               | (Year 2019)               | (Year 1990)                                        | (Year 2019)      | (Year 1990–Year 2019)                                       |
|                             | Madagascar                | 28958 (27086 to 30958)    | 62457 (58392 to 66781)                             | 387 (364 to 410) | 357 (336 to 380)                                            |
| Malawi                      | 17419 (16343 to 18504)    | 33843 (31621 to 36156)    | 294 (277 to 310)                                   | 292 (274 to 310) | -0.6% (-2.2% to 0.8%)                                       |
| Mozambique                  | 44165 (36287 to 58750)    | 82974 (76744 to 91370)    | 501 (426 to 636)                                   | 496 (460 to 552) | -1.0% (-13.9% to 9.1%)                                      |
| Rwanda                      | 22408 (20656 to 25061)    | 47538 (39579 to 62410)    | 500 (469 to 539)                                   | 540 (451 to 701) | 7.9% (-7.7% to 41.3%)                                       |
| Somalia                     | 15940 (13747 to 22257)    | 45237 (40209 to 53126)    | 355 (319 to 454)                                   | 375 (339 to 433) | 5.4% (-8.1% to 13.4%)                                       |
| South Sudan                 | 16135 (14910 to 17648)    | 26382 (23597 to 30638)    | 449 (419 to 485)                                   | 453 (411 to 514) | 1.0% (-3.6% to 8.3%)                                        |
| Uganda                      | 40438 (33471 to 53028)    | 88572 (81633 to 97593)    | 380 (327 to 475)                                   | 383 (353 to 427) | 0.6% (-10.5% to 9.4%)                                       |
| United Republic of Tanzania | 52426 (49327 to 55790)    | 122702 (115238 to 130321) | 331 (313 to 350)                                   | 338 (320 to 357) | 2.1% (0.6% to 3.4%)                                         |
| Zambia                      | 12756 (11996 to 13624)    | 32697 (30668 to 34830)    | 279 (265 to 296)                                   | 291 (275 to 308) | 4.2% (2.7% to 5.7%)                                         |
| Central Sub-Saharan Africa  | 132497 (122290 to 145589) | 338451 (308212 to 380779) | 367 (344 to 396)                                   | 396 (363 to 441) | 7.8% (4.6% to 12.2%)                                        |
| Angola                      | 35168 (27673 to 46702)    | 84342 (74531 to 99345)    | 482 (401 to 604)                                   | 461 (406 to 544) | -4.3% (-11% to 1.6%)                                        |
| Central African Republic    | 5137 (4892 to 5410)       | 14127 (12332 to 16792)    | 286 (273 to 300)                                   | 372 (333 to 427) | 30.0% (18.1% to 50.3%)                                      |

1  
2  
3  
4  
5  
6  
7  
8  
9  
10  
11  
12  
13  
14  
15  
16  
17  
18  
19  
20  
21  
22  
23  
24  
25  
26  
27  
28  
29  
30  
31  
32  
33  
34  
35  
36  
37  
38  
39  
40  
41  
42  
43  
44  
45  
46

| Location                         | Prevalence             |                           |                                                    |                  |                                                             |
|----------------------------------|------------------------|---------------------------|----------------------------------------------------|------------------|-------------------------------------------------------------|
|                                  | Numbers<br>(95% UI)    |                           | Age-standardized estimates per 100,000<br>(95% UI) |                  | Percentage change of age-standardized<br>estimates (95% UI) |
|                                  | (Year 1990)            | (Year 2019)               | (Year 1990)                                        | (Year 2019)      | (Year 1990–Year 2019)                                       |
|                                  | Congo                  | 5269 (5019 to 5530)       | 15760 (13995 to 18395)                             | 336 (320 to 352) | 397 (356 to 455)                                            |
| Democratic Republic of the Congo | 83247 (79033 to 87924) | 215440 (199080 to 237463) | 343 (327 to 361)                                   | 376 (350 to 409) | 9.5% (4.2% to 17.7%)                                        |
| Equatorial Guinea                | 853 (813 to 896)       | 3166 (3003 to 3328)       | 305 (291 to 320)                                   | 358 (341 to 376) | 17.2% (14.9% to 19.4%)                                      |
| Gabon                            | 2823 (2700 to 2962)    | 5616 (5359 to 5908)       | 400 (383 to 420)                                   | 403 (386 to 424) | 0.7% (-0.7% to 2.2%)                                        |

Abbreviations: UI, uncertainty interval

1  
2  
3  
4  
5  
6  
7  
8  
9  
10  
11  
12  
13  
14  
15  
16  
17  
18  
19  
20  
21  
22  
23  
24  
25  
26  
27  
28  
29  
30  
31  
32  
33  
34  
35  
36  
37  
38  
39  
40  
41  
42  
43  
44  
45  
46

Table 10. Years lived with disability for 1990 and 2019 and percentage changes of age-standardized rates by location for traumatic brain injury, 1990–2019

| Location                  | YLD                          |                              |                                                |                  |                                                         |
|---------------------------|------------------------------|------------------------------|------------------------------------------------|------------------|---------------------------------------------------------|
|                           | Numbers<br>(95% UI)          |                              | Age-standardized rates per 100,000<br>(95% UI) |                  | Percentage change of age-standardized rates<br>(95% UI) |
|                           | (Year 1990)                  | (Year 2019)                  | (Year 1990)                                    | (Year 2019)      | (Year 1990–Year 2019)                                   |
| Global                    | 3953933 (2777811 to 5334853) | 7076902 (4997948 to 9588098) | 86 (61 to 117)                                 | 87 (61 to 117)   | 0.1% (-1% to 1.3%)                                      |
| High-income               | 1014882 (712991 to 1373593)  | 1360583 (957111 to 1837205)  | 96 (67 to 130)                                 | 88 (61 to 118)   | -8.9% (-10.1% to -7.7%)                                 |
| High-income North America | 245962 (171414 to 333811)    | 342093 (241165 to 461325)    | 78 (54 to 106)                                 | 69 (48 to 93)    | -11.5% (-13% to -9.8%)                                  |
| Canada                    | 34042 (23793 to 46540)       | 58904 (41426 to 79662)       | 110 (77 to 151)                                | 107 (75 to 144)  | -3.2% (-6.9% to 0.8%)                                   |
| Greenland                 | 36 (25 to 50)                | 37 (26 to 49)                | 73 (51 to 99)                                  | 56 (39 to 75)    | -23.1% (-26.6% to -19.5%)                               |
| United States of America  | 211878 (147546 to 287094)    | 283146 (199948 to 381051)    | 75 (52 to 101)                                 | 65 (45 to 87)    | -13.5% (-15.1% to -11.9%)                               |
| Australasia               | 35580 (25007 to 48065)       | 62658 (44000 to 84416)       | 162 (114 to 219)                               | 166 (115 to 225) | 2.2% (-0.7% to 5.4%)                                    |
| Australia                 | 28806 (20192 to 38986)       | 51733 (36213 to 69985)       | 157 (110 to 212)                               | 162 (112 to 220) | 2.8% (-0.6% to 6.5%)                                    |
| New Zealand               | 6774 (4757 to 9172)          | 10925 (7716 to 14864)        | 186 (131 to 252)                               | 187 (132 to 254) | 0.8% (-2.2% to 4.3%)                                    |
| High-income Asia Pacific  | 165215 (115479 to 223728)    | 222787 (156099 to 301904)    | 84 (59 to 114)                                 | 76 (53 to 104)   | -9.5% (-11.4% to -7.7%)                                 |
| Brunei Darussalam         | 214 (150 to 295)             | 408 (287 to 557)             | 110 (77 to 148)                                | 94 (67 to 128)   | -13.9% (-17.4% to -10.5%)                               |
| Japan                     | 112943 (78986 to 152999)     | 131214 (91583 to 177340)     | 73 (51 to 99)                                  | 61 (43 to 83)    | -16.3% (-17.7% to -14.9%)                               |

1  
2

| Location          | YLD                       |                           |                                                |                  |                                                         |
|-------------------|---------------------------|---------------------------|------------------------------------------------|------------------|---------------------------------------------------------|
|                   | Numbers<br>(95% UI)       |                           | Age-standardized rates per 100,000<br>(95% UI) |                  | Percentage change of age-standardized rates<br>(95% UI) |
|                   | (Year 1990)               | (Year 2019)               | (Year 1990)                                    | (Year 2019)      | (Year 1990–Year 2019)                                   |
| Republic of Korea | 49224 (34429 to 66793)    | 84408 (58733 to 115371)   | 121 (85 to 165)                                | 111 (78 to 152)  | -8.5% (-12% to -4.9%)                                   |
| Singapore         | 2834 (1964 to 3874)       | 6757 (4714 to 9192)       | 94 (65 to 128)                                 | 92 (64 to 125)   | -2.3% (-6.4% to 1.8%)                                   |
| Western Europe    | 521859 (366129 to 707104) | 655051 (458429 to 881035) | 110 (77 to 149)                                | 100 (70 to 136)  | -8.8% (-10.8% to -6.7%)                                 |
| Andorra           | 72 (50 to 97)             | 153 (107 to 208)          | 124 (87 to 168)                                | 126 (88 to 170)  | 1.5% (-2.4% to 5.6%)                                    |
| Austria           | 12269 (8528 to 16668)     | 14826 (10349 to 20156)    | 127 (88 to 173)                                | 112 (78 to 151)  | -12% (-15.6% to -8.1%)                                  |
| Belgium           | 15634 (10923 to 21080)    | 22555 (15827 to 30372)    | 125 (88 to 170)                                | 132 (91 to 178)  | 4.9% (0.8% to 9.2%)                                     |
| Cyprus            | 826 (581 to 1120)         | 1721 (1213 to 2332)       | 102 (72 to 138)                                | 104 (73 to 141)  | 1.7% (-3.1% to 6.2%)                                    |
| Denmark           | 7755 (5449 to 10493)      | 8047 (5630 to 10829)      | 116 (81 to 156)                                | 99 (69 to 135)   | -14.1% (-18% to -9.9%)                                  |
| Finland           | 9497 (6674 to 12879)      | 12214 (8542 to 16578)     | 155 (109 to 211)                               | 146 (101 to 198) | -6.2% (-9.9% to -2.4%)                                  |
| France            | 92736 (65233 to 125053)   | 122822 (85860 to 166276)  | 132 (93 to 178)                                | 122 (85 to 165)  | -7.7% (-11.7% to -3.9%)                                 |
| Germany           | 110220 (77245 to 149618)  | 135464 (94583 to 183616)  | 108 (75 to 146)                                | 102 (71 to 139)  | -4.9% (-8.9% to -0.4%)                                  |
| Greece            | 14192 (9960 to 19169)     | 14822 (10382 to 20098)    | 113 (79 to 152)                                | 99 (69 to 135)   | -12.1% (-15.9% to -8.2%)                                |
| Iceland           | 286 (201 to 388)          | 453 (317 to 610)          | 107 (75 to 145)                                | 103 (71 to 139)  | -4.3% (-8.4% to 0%)                                     |
| Ireland           | 3737 (2589 to 5076)       | 6046 (4161 to 8182)       | 101 (70 to 137)                                | 99 (68 to 134)   | -1.7% (-6.4% to 3%)                                     |
| Israel            | 4397 (3066 to 5955)       | 9508 (6760 to 13018)      | 93 (65 to 126)                                 | 96 (68 to 131)   | 3.1% (-2.3% to 8.9%)                                    |

39  
40  
41  
42  
43  
44  
45  
46

1

2

3

4

5

6

7

8

9

10

11

12

13

14

15

16

17

18

19

20

21

22

23

24

25

26

27

28

29

30

31

32

33

34

35

36

37

38

39

40

41

42

43

44

45

46

47

48

49

50

51

52

53

54

55

56

| Location                      | YLD                     |                         |                                                |                 |                                                         |
|-------------------------------|-------------------------|-------------------------|------------------------------------------------|-----------------|---------------------------------------------------------|
|                               | Numbers<br>(95% UI)     |                         | Age-standardized rates per 100,000<br>(95% UI) |                 | Percentage change of age-standardized rates<br>(95% UI) |
|                               | (Year 1990)             | (Year 2019)             | (Year 1990)                                    | (Year 2019)     | (Year 1990–Year 2019)                                   |
| Italy                         | 86061 (60155 to 116787) | 93736 (66044 to 126346) | 118 (82 to 160)                                | 96 (67 to 131)  | -18.3% (-20% to -16.5%)                                 |
| Luxembourg                    | 615 (432 to 829)        | 963 (676 to 1301)       | 131 (92 to 177)                                | 115 (80 to 156) | -12% (-15.4% to -8.3%)                                  |
| Malta                         | 408 (287 to 553)        | 699 (489 to 938)        | 101 (71 to 136)                                | 111 (78 to 149) | 10% (5.2% to 14.8%)                                     |
| Monaco                        | 22 (16 to 30)           | 29 (20 to 39)           | 51 (36 to 69)                                  | 51 (36 to 70)   | 0.3% (-5% to 5.3%)                                      |
| Netherlands                   | 15909 (11173 to 21703)  | 25119 (17756 to 33892)  | 90 (63 to 123)                                 | 96 (68 to 130)  | 6.8% (2.1% to 11.5%)                                    |
| Norway                        | 3324 (2336 to 4499)     | 3921 (2761 to 5272)     | 63 (44 to 85)                                  | 53 (37 to 71)   | -15.8% (-17.6% to -13.8%)                               |
| Portugal                      | 12329 (8677 to 16672)   | 12024 (8572 to 16421)   | 105 (74 to 142)                                | 72 (51 to 99)   | -30.8% (-34.4% to -27.3%)                               |
| San Marino                    | 16 (11 to 21)           | 24 (17 to 32)           | 57 (40 to 77)                                  | 53 (37 to 72)   | -7.1% (-11.7% to -2.6%)                                 |
| Spain                         | 50036 (35096 to 67824)  | 65877 (45969 to 89448)  | 110 (77 to 149)                                | 97 (68 to 133)  | -11.9% (-16.4% to -7.3%)                                |
| Sweden                        | 6247 (4389 to 8442)     | 7003 (4895 to 9443)     | 56 (40 to 76)                                  | 48 (34 to 65)   | -14.1% (-17.9% to -10.1%)                               |
| Switzerland                   | 13892 (9797 to 18811)   | 17102 (12059 to 23120)  | 158 (111 to 214)                               | 130 (90 to 175) | -17.9% (-21.3% to -14.3%)                               |
| United Kingdom                | 60948 (42742 to 82260)  | 79351 (55900 to 107435) | 87 (61 to 118)                                 | 85 (59 to 115)  | -1.8% (-3.6% to 0%)                                     |
| <b>Southern Latin America</b> | 46267 (32375 to 62358)  | 77994 (55135 to 105285) | 97 (68 to 131)                                 | 104 (74 to 141) | 7.5% (4.2% to 11%)                                      |
| Argentina                     | 31020 (21788 to 41792)  | 50115 (35459 to 67528)  | 96 (68 to 130)                                 | 102 (72 to 137) | 6.1% (1.8% to 10.5%)                                    |
| Chile                         | 11380 (7906 to 15406)   | 23074 (16248 to 30963)  | 95 (66 to 128)                                 | 107 (75 to 144) | 12.8% (8.4% to 17.2%)                                   |

| Location                                                | YLD                        |                            |                                                |                  |                                                         |
|---------------------------------------------------------|----------------------------|----------------------------|------------------------------------------------|------------------|---------------------------------------------------------|
|                                                         | Numbers<br>(95% UI)        |                            | Age-standardized rates per 100,000<br>(95% UI) |                  | Percentage change of age-standardized rates<br>(95% UI) |
|                                                         | (Year 1990)                | (Year 2019)                | (Year 1990)                                    | (Year 2019)      | (Year 1990–Year 2019)                                   |
| Uruguay                                                 | 3865 (2698 to 5241)        | 4802 (3353 to 6507)        | 115 (80 to 156)                                | 116 (81 to 158)  | 1.2% (-3% to 5.6%)                                      |
| <b>Central Europe, Eastern Europe, and Central Asia</b> | 943958 (661605 to 1277133) | 913700 (644818 to 1239156) | 208 (146 to 282)                               | 173 (122 to 235) | -16.9% (-17.9% to -15.9%)                               |
| <b>Eastern Europe</b>                                   | 604907 (424334 to 817583)  | 536447 (376708 to 725229)  | 233 (164 to 316)                               | 193 (136 to 261) | -17.4% (-18.5% to -16.3%)                               |
| Belarus                                                 | 23518 (16376 to 32097)     | 22096 (15455 to 29994)     | 198 (138 to 271)                               | 173 (121 to 235) | -12.8% (-15.6% to -9.9%)                                |
| Estonia                                                 | 4277 (2978 to 5809)        | 2784 (1953 to 3788)        | 235 (164 to 319)                               | 154 (107 to 210) | -34.6% (-37% to -32.1%)                                 |
| Latvia                                                  | 8038 (5651 to 10926)       | 4361 (3084 to 5934)        | 255 (179 to 347)                               | 161 (114 to 220) | -36.9% (-39.1% to -34.7%)                               |
| Lithuania                                               | 10053 (7071 to 13649)      | 7172 (5059 to 9771)        | 242 (170 to 328)                               | 177 (124 to 241) | -26.7% (-29.1% to -24.2%)                               |
| Republic of Moldova                                     | 8505 (5924 to 11540)       | 6673 (4694 to 9089)        | 185 (129 to 252)                               | 138 (98 to 189)  | -25.4% (-27.9% to -22.7%)                               |
| Russian Federation                                      | 415551 (290189 to 561463)  | 387145 (272036 to 522377)  | 243 (170 to 329)                               | 200 (141 to 271) | -17.5% (-18.8% to -16.1%)                               |
| Ukraine                                                 | 134965 (95231 to 182486)   | 106217 (74659 to 143539)   | 216 (152 to 293)                               | 181 (127 to 245) | -16.1% (-18.6% to -13.5%)                               |
| <b>Central Europe</b>                                   | 278598 (195451 to 377346)  | 289346 (203891 to 392223)  | 204 (143 to 276)                               | 185 (130 to 251) | -9.2% (-10.6% to -7.7%)                                 |
| Albania                                                 | 4883 (3432 to 6644)        | 5913 (4153 to 8047)        | 174 (122 to 236)                               | 174 (122 to 238) | 0.2% (-3.5% to 3.6%)                                    |
| Bosnia and Herzegovina                                  | 7424 (5249 to 10029)       | 7966 (5840 to 10686)       | 158 (112 to 213)                               | 180 (131 to 242) | 14% (9.5% to 19.8%)                                     |
| Bulgaria                                                | 20529 (14452 to 27707)     | 16763 (11871 to 22686)     | 196 (137 to 266)                               | 178 (125 to 241) | -9.3% (-12.3% to -6.3%)                                 |
| Croatia                                                 | 13018 (9165 to 17568)      | 13031 (9190 to 17543)      | 225 (158 to 303)                               | 210 (147 to 284) | -6.7% (-10% to -3.7%)                                   |

| Location        | YLD                     |                          |                                                |                  |                                                         |
|-----------------|-------------------------|--------------------------|------------------------------------------------|------------------|---------------------------------------------------------|
|                 | Numbers<br>(95% UI)     |                          | Age-standardized rates per 100,000<br>(95% UI) |                  | Percentage change of age-standardized rates<br>(95% UI) |
|                 | (Year 1990)             | (Year 2019)              | (Year 1990)                                    | (Year 2019)      | (Year 1990–Year 2019)                                   |
| Czechia         | 27847 (19624 to 37900)  | 30328 (21306 to 41027)   | 232 (163 to 315)                               | 204 (142 to 277) | -11.8% (-14.7% to -8.7%)                                |
| Hungary         | 27345 (19336 to 37321)  | 24110 (16879 to 32515)   | 216 (152 to 295)                               | 175 (123 to 238) | -18.9% (-21.9% to -15.9%)                               |
| Montenegro      | 1188 (833 to 1615)      | 1451 (1015 to 1975)      | 184 (129 to 250)                               | 184 (129 to 250) | 0.1% (-3.1% to 3.1%)                                    |
| North Macedonia | 3138 (2192 to 4235)     | 4402 (3104 to 5938)      | 153 (107 to 206)                               | 161 (113 to 217) | 5.7% (2.1% to 9.1%)                                     |
| Poland          | 86522 (60412 to 116964) | 101897 (71521 to 138435) | 208 (145 to 282)                               | 193 (135 to 262) | -7.5% (-9.4% to -5.7%)                                  |
| Romania         | 49979 (35005 to 67925)  | 43079 (30195 to 58391)   | 192 (133 to 261)                               | 165 (115 to 223) | -14% (-16.8% to -11.2%)                                 |
| Serbia          | 18768 (13173 to 25405)  | 19024 (13534 to 25615)   | 175 (123 to 238)                               | 167 (118 to 226) | -4.9% (-8.8% to -0.6%)                                  |
| Slovakia        | 11979 (8428 to 16274)   | 14550 (10196 to 19759)   | 212 (149 to 288)                               | 198 (138 to 270) | -6.4% (-9.3% to -3.2%)                                  |
| Slovenia        | 5978 (4228 to 8143)     | 6831 (4851 to 9290)      | 263 (186 to 359)                               | 223 (157 to 303) | -15.4% (-18% to -12.6%)                                 |
| Central Asia    | 60453 (42819 to 81137)  | 87908 (62104 to 118441)  | 104 (74 to 140)                                | 96 (68 to 129)   | -7.9% (-9.8% to -6%)                                    |
| Armenia         | 5275 (3906 to 6815)     | 3855 (2879 to 5035)      | 162 (121 to 210)                               | 107 (80 to 139)  | -34.2% (-39.4% to -29.5%)                               |
| Azerbaijan      | 5777 (3992 to 7870)     | 9254 (6507 to 12554)     | 91 (63 to 123)                                 | 82 (57 to 111)   | -9.9% (-14.1% to -5.4%)                                 |
| Georgia         | 6836 (4788 to 9279)     | 5528 (3927 to 7487)      | 115 (81 to 156)                                | 122 (86 to 164)  | 5.7% (1% to 9.9%)                                       |
| Kazakhstan      | 17806 (12422 to 24221)  | 22119 (15369 to 29968)   | 118 (82 to 160)                                | 116 (80 to 156)  | -1.7% (-5.4% to 2.1%)                                   |
| Kyrgyzstan      | 3840 (2694 to 5235)     | 5357 (3746 to 7331)      | 106 (74 to 144)                                | 90 (63 to 123)   | -14.6% (-18.4% to -10.7%)                               |
| Mongolia        | 1364 (945 to 1859)      | 3614 (2527 to 4944)      | 88 (61 to 120)                                 | 108 (76 to 148)  | 23.6% (18.8% to 28.9%)                                  |

1  
2

| Location                           | YLD                       |                           |                                                |                 |                                                         |
|------------------------------------|---------------------------|---------------------------|------------------------------------------------|-----------------|---------------------------------------------------------|
|                                    | Numbers<br>(95% UI)       |                           | Age-standardized rates per 100,000<br>(95% UI) |                 | Percentage change of age-standardized rates<br>(95% UI) |
|                                    | (Year 1990)               | (Year 2019)               | (Year 1990)                                    | (Year 2019)     | (Year 1990–Year 2019)                                   |
| Tajikistan                         | 3561 (2505 to 4843)       | 6424 (4676 to 8702)       | 94 (65 to 128)                                 | 79 (58 to 107)  | -15.4% (-20.4% to -7.8%)                                |
| Turkmenistan                       | 2302 (1611 to 3128)       | 3832 (2673 to 5211)       | 83 (58 to 112)                                 | 78 (54 to 105)  | -6.2% (-10.7% to -1.7%)                                 |
| Uzbekistan                         | 13692 (9568 to 18537)     | 27924 (19438 to 38027)    | 88 (61 to 119)                                 | 88 (61 to 120)  | 0.8% (-3.4% to 5.3%)                                    |
| <b>Latin America and Caribbean</b> | 202620 (142813 to 272345) | 373193 (262150 to 502419) | 66 (47 to 88)                                  | 61 (43 to 83)   | -6.6% (-8.6% to -4.9%)                                  |
| <b>Central Latin America</b>       | 102992 (73993 to 138066)  | 181186 (127975 to 243118) | 83 (59 to 110)                                 | 72 (51 to 97)   | -12.9% (-15.1% to -11.1%)                               |
| Colombia                           | 31423 (22333 to 42234)    | 49058 (34579 to 66389)    | 121 (86 to 162)                                | 96 (67 to 129)  | -21% (-24.8% to -17.4%)                                 |
| Costa Rica                         | 2074 (1433 to 2814)       | 4616 (3252 to 6244)       | 88 (61 to 119)                                 | 90 (64 to 122)  | 3.2% (-0.9% to 7.2%)                                    |
| El Salvador                        | 5041 (3605 to 6925)       | 6163 (4489 to 8066)       | 120 (87 to 163)                                | 101 (74 to 133) | -15.3% (-27% to -5.2%)                                  |
| Guatemala                          | 4717 (3396 to 6407)       | 11867 (8491 to 15982)     | 82 (59 to 110)                                 | 82 (58 to 110)  | -0.3% (-11.1% to 8.3%)                                  |
| Honduras                           | 2410 (1669 to 3256)       | 6477 (4576 to 8738)       | 75 (52 to 101)                                 | 80 (57 to 107)  | 6.2% (1.4% to 11.5%)                                    |
| Mexico                             | 38323 (26631 to 51746)    | 66975 (46700 to 90175)    | 61 (43 to 82)                                  | 53 (37 to 72)   | -12.8% (-14.3% to -11.4%)                               |
| Nicaragua                          | 2797 (1946 to 4012)       | 4465 (3234 to 5975)       | 100 (71 to 140)                                | 79 (57 to 105)  | -20.8% (-32.2% to -10.6%)                               |
| Panama                             | 1668 (1182 to 2235)       | 3399 (2382 to 4556)       | 85 (60 to 114)                                 | 81 (57 to 109)  | -4.9% (-9.2% to -0.5%)                                  |
| Venezuela (Bolivarian Republic of) | 14538 (10051 to 19674)    | 28166 (19857 to 38293)    | 99 (69 to 133)                                 | 95 (67 to 129)  | -4.1% (-8.1% to 0.1%)                                   |
| <b>Andean Latin America</b>        | 17095 (12192 to 23048)    | 38002 (26845 to 51360)    | 59 (42 to 79)                                  | 62 (44 to 84)   | 5.8% (1.3% to 10.1%)                                    |
| Bolivia (Plurinational State of)   | 2475 (1709 to 3360)       | 5668 (3998 to 7760)       | 53 (37 to 71)                                  | 54 (38 to 74)   | 2% (-3.6% to 7.7%)                                      |

40  
41  
42  
43  
44  
45  
46



| Location                         | YLD                    |                        |                                                |                |                                                         |
|----------------------------------|------------------------|------------------------|------------------------------------------------|----------------|---------------------------------------------------------|
|                                  | Numbers<br>(95% UI)    |                        | Age-standardized rates per 100,000<br>(95% UI) |                | Percentage change of age-standardized rates<br>(95% UI) |
|                                  | (Year 1990)            | (Year 2019)            | (Year 1990)                                    | (Year 2019)    | (Year 1990–Year 2019)                                   |
| Ecuador                          | 4968 (3561 to 6674)    | 11962 (8388 to 16108)  | 66 (47 to 89)                                  | 72 (51 to 97)  | 9.1% (3.8% to 14.4%)                                    |
| Peru                             | 9652 (6881 to 13116)   | 20373 (14499 to 27345) | 57 (41 to 78)                                  | 60 (43 to 81)  | 4.9% (-1.7% to 11.4%)                                   |
| <b>Caribbean</b>                 | 22600 (15774 to 30498) | 40644 (28816 to 54647) | 74 (52 to 100)                                 | 81 (57 to 109) | 9% (5.7% to 13.4%)                                      |
| Antigua and Barbuda              | 37 (25 to 50)          | 72 (51 to 98)          | 66 (46 to 90)                                  | 71 (50 to 96)  | 7.3% (2.2% to 12.3%)                                    |
| Bahamas                          | 157 (110 to 216)       | 310 (218 to 421)       | 72 (50 to 98)                                  | 75 (52 to 101) | 3.8% (-1.1% to 9%)                                      |
| Barbados                         | 166 (116 to 225)       | 252 (176 to 342)       | 64 (44 to 86)                                  | 66 (46 to 90)  | 3.8% (-1.4% to 9%)                                      |
| Belize                           | 95 (66 to 130)         | 298 (211 to 407)       | 73 (51 to 99)                                  | 82 (58 to 111) | 12.6% (7.8% to 17.7%)                                   |
| Bermuda                          | 36 (25 to 49)          | 45 (31 to 61)          | 54 (37 to 74)                                  | 50 (35 to 68)  | -6.6% (-11.8% to -1%)                                   |
| Cuba                             | 10126 (7061 to 13687)  | 14632 (10260 to 19851) | 94 (65 to 127)                                 | 93 (66 to 126) | -0.4% (-5.1% to 4.2%)                                   |
| Dominica                         | 42 (29 to 57)          | 55 (39 to 75)          | 64 (44 to 86)                                  | 70 (49 to 95)  | 10.1% (5.5% to 15%)                                     |
| Dominican Republic               | 3741 (2608 to 5083)    | 9454 (6610 to 12921)   | 69 (48 to 94)                                  | 90 (63 to 123) | 30% (24.1% to 36.1%)                                    |
| Grenada                          | 45 (32 to 61)          | 80 (56 to 108)         | 64 (45 to 85)                                  | 71 (50 to 96)  | 11.3% (3.9% to 18.3%)                                   |
| Guyana                           | 374 (264 to 510)       | 561 (392 to 763)       | 63 (44 to 85)                                  | 76 (53 to 103) | 20.2% (14.4% to 25.9%)                                  |
| Haiti                            | 2680 (1858 to 3638)    | 7284 (5476 to 9644)    | 56 (39 to 76)                                  | 69 (52 to 91)  | 23.2% (10.8% to 41.9%)                                  |
| Jamaica                          | 1176 (817 to 1584)     | 1858 (1294 to 2526)    | 59 (41 to 80)                                  | 62 (43 to 84)  | 4.8% (-0.7% to 10.9%)                                   |
| Puerto Rico                      | 2108 (1465 to 2874)    | 2444 (1722 to 3287)    | 58 (41 to 80)                                  | 51 (36 to 69)  | -12.5% (-17.1% to -7%)                                  |
| Saint Kitts and Nevis            | 17 (12 to 23)          | 34 (24 to 46)          | 47 (33 to 64)                                  | 50 (35 to 67)  | 8% (3.1% to 13.3%)                                      |
| Saint Lucia                      | 72 (50 to 98)          | 149 (105 to 202)       | 67 (47 to 91)                                  | 72 (51 to 98)  | 4.7% (-0.9% to 10.7%)                                   |
| Saint Vincent and the Grenadines | 51 (36 to 69)          | 84 (59 to 114)         | 60 (42 to 80)                                  | 66 (46 to 90)  | 10.6% (5% to 16.9%)                                     |
| Suriname                         | 222 (155 to 301)       | 432 (305 to 583)       | 67 (47 to 91)                                  | 71 (50 to 96)  | 5.5% (-1.5% to 11.3%)                                   |

1  
2  
3  
4  
5  
6  
7  
8  
9  
10  
11  
12  
13  
14  
15  
16  
17  
18  
19  
20  
21  
22  
23  
24  
25  
26  
27  
28  
29  
30  
31  
32  
33  
34  
35  
36  
37  
38  
39  
40  
41  
42  
43  
44  
45  
46

| Location                                      | YLD                       |                             |                                                |                |                                                         |
|-----------------------------------------------|---------------------------|-----------------------------|------------------------------------------------|----------------|---------------------------------------------------------|
|                                               | Numbers<br>(95% UI)       |                             | Age-standardized rates per 100,000<br>(95% UI) |                | Percentage change of age-standardized rates<br>(95% UI) |
|                                               | (Year 1990)               | (Year 2019)                 | (Year 1990)                                    | (Year 2019)    | (Year 1990–Year 2019)                                   |
| Trinidad and Tobago                           | 647 (447 to 872)          | 1160 (818 to 1573)          | 62 (43 to 83)                                  | 70 (49 to 95)  | 13.5% (7.8% to 19.7%)                                   |
| United States Virgin Islands                  | 57 (40 to 79)             | 64 (45 to 87)               | 56 (39 to 76)                                  | 47 (33 to 64)  | -14.9% (-19.5% to -9.8%)                                |
| <b>Tropical Latin America</b>                 | 59933 (41675 to 80749)    | 113361 (79088 to 154099)    | 49 (34 to 65)                                  | 46 (32 to 63)  | -5.1% (-8.5% to -1.6%)                                  |
| Brazil                                        | 57701 (40149 to 77611)    | 108257 (75602 to 147092)    | 48 (33 to 64)                                  | 45 (32 to 61)  | -5.7% (-9.2% to -2.2%)                                  |
| Paraguay                                      | 2231 (1540 to 3049)       | 5103 (3604 to 6965)         | 74 (52 to 101)                                 | 78 (55 to 107) | 5.8% (0.9% to 10.9%)                                    |
| <b>Southeast Asia, East Asia, and Oceania</b> | 558047 (390436 to 759042) | 1403425 (994536 to 1907325) | 39 (27 to 52)                                  | 53 (38 to 72)  | 37.8% (35.3% to 40.5%)                                  |
| <b>East Asia</b>                              | 331950 (231139 to 451082) | 961990 (676389 to 1304904)  | 31 (22 to 42)                                  | 49 (34 to 66)  | 57.4% (53.8% to 61.4%)                                  |
| China                                         | 310524 (216428 to 421804) | 928651 (653288 to 1259096)  | 30 (21 to 41)                                  | 49 (34 to 66)  | 62.2% (58.4% to 66.3%)                                  |
| Democratic People's Republic of Korea         | 8365 (5757 to 11421)      | 14583 (10154 to 20004)      | 44 (30 to 59)                                  | 46 (32 to 63)  | 5.6% (-1% to 11.3%)                                     |
| Taiwan (Province of China)                    | 13062 (9050 to 17766)     | 18755 (13050 to 25434)      | 70 (49 to 95)                                  | 54 (38 to 74)  | -22.2% (-26.2% to -17.8%)                               |
| <b>Southeast Asia</b>                         | 223869 (157515 to 304129) | 435373 (313813 to 588454)   | 62 (44 to 84)                                  | 64 (46 to 86)  | 2.2% (-0.2% to 5%)                                      |
| Cambodia                                      | 4888 (3284 to 7407)       | 10450 (7541 to 14233)       | 67 (47 to 97)                                  | 72 (52 to 97)  | 7.1% (-14% to 22.2%)                                    |
| Indonesia                                     | 68162 (47545 to 93357)    | 111645 (79306 to 151466)    | 47 (33 to 65)                                  | 43 (30 to 58)  | -9.7% (-12.4% to -6.3%)                                 |
| Lao People's Democratic Republic              | 1835 (1274 to 2511)       | 3769 (2634 to 5135)         | 62 (43 to 84)                                  | 62 (44 to 85)  | 0.8% (-4.7% to 5.8%)                                    |

| Location                         | YLD                    |                         |                                                |                |                                                         |
|----------------------------------|------------------------|-------------------------|------------------------------------------------|----------------|---------------------------------------------------------|
|                                  | Numbers<br>(95% UI)    |                         | Age-standardized rates per 100,000<br>(95% UI) |                | Percentage change of age-standardized rates<br>(95% UI) |
|                                  | (Year 1990)            | (Year 2019)             | (Year 1990)                                    | (Year 2019)    | (Year 1990–Year 2019)                                   |
| Malaysia                         | 10197 (7057 to 13976)  | 25949 (18147 to 35442)  | 76 (53 to 104)                                 | 84 (59 to 115) | 10.3% (5.3% to 15.3%)                                   |
| Maldives                         | 74 (52 to 101)         | 284 (204 to 386)        | 53 (37 to 72)                                  | 60 (43 to 81)  | 12.5% (6.6% to 19.3%)                                   |
| Mauritius                        | 383 (267 to 524)       | 709 (497 to 965)        | 40 (28 to 54)                                  | 44 (31 to 61)  | 12.2% (4.5% to 19.1%)                                   |
| Myanmar                          | 20691 (14652 to 28025) | 37979 (28490 to 49831)  | 64 (46 to 87)                                  | 71 (53 to 93)  | 10.9% (2.5% to 24.2%)                                   |
| Philippines                      | 30614 (21882 to 41001) | 63439 (45829 to 85592)  | 68 (48 to 90)                                  | 65 (47 to 87)  | -4.1% (-6.3% to -2.2%)                                  |
| Seychelles                       | 27 (18 to 36)          | 56 (39 to 76)           | 43 (30 to 58)                                  | 48 (33 to 64)  | 10.9% (4.4% to 17.5%)                                   |
| Sri Lanka                        | 10643 (7574 to 14518)  | 21080 (15551 to 27555)  | 73 (52 to 99)                                  | 86 (64 to 113) | 18.1% (10.3% to 28.9%)                                  |
| Thailand                         | 42422 (29573 to 58447) | 70147 (49354 to 94871)  | 86 (61 to 118)                                 | 76 (53 to 103) | -12.6% (-16.4% to -8.8%)                                |
| Timor-Leste                      | 404 (288 to 557)       | 722 (530 to 963)        | 70 (51 to 94)                                  | 73 (53 to 97)  | 4.9% (-1.2% to 11.4%)                                   |
| Viet Nam                         | 33231 (23150 to 45336) | 88575 (62570 to 120852) | 66 (46 to 91)                                  | 86 (61 to 117) | 29.2% (23.7% to 35.1%)                                  |
| <b>Oceania</b>                   | 2228 (1554 to 3027)    | 6062 (4359 to 8110)     | 49 (34 to 67)                                  | 59 (42 to 79)  | 19.7% (14.7% to 25.6%)                                  |
| American Samoa                   | 13 (9 to 18)           | 20 (15 to 27)           | 39 (27 to 52)                                  | 38 (29 to 50)  | -0.6% (-8.2% to 10.3%)                                  |
| Cook Islands                     | 8 (5 to 10)            | 9 (7 to 12)             | 49 (35 to 67)                                  | 43 (30 to 58)  | -12.5% (-17.6% to -7.7%)                                |
| Fiji                             | 254 (176 to 347)       | 404 (285 to 550)        | 43 (30 to 59)                                  | 46 (32 to 62)  | 5.3% (-0.5% to 11.6%)                                   |
| Guam                             | 50 (35 to 68)          | 71 (49 to 96)           | 44 (31 to 60)                                  | 39 (27 to 53)  | -11.9% (-16.9% to -6.8%)                                |
| Kiribati                         | 19 (14 to 26)          | 36 (25 to 49)           | 34 (24 to 46)                                  | 36 (26 to 49)  | 5.7% (-1.6% to 12.9%)                                   |
| Marshall Islands                 | 13 (9 to 18)           | 25 (17 to 34)           | 50 (34 to 67)                                  | 51 (36 to 69)  | 3.6% (-1.8% to 9%)                                      |
| Micronesia (Federated States of) | 34 (24 to 47)          | 49 (34 to 66)           | 50 (35 to 67)                                  | 54 (38 to 73)  | 8.2% (2.2% to 14.5%)                                    |

1  
2  
3  
4  
5  
6  
7  
8  
9  
10  
11  
12  
13  
14  
15  
16  
17  
18  
19  
20  
21  
22  
23  
24  
25  
26  
27  
28  
29  
30  
31  
32  
33  
34  
35  
36  
37  
38  
39  
40  
41  
42  
43  
44  
45  
46

| Location                     | YLD                       |                           |                                                |                 |                                                         |
|------------------------------|---------------------------|---------------------------|------------------------------------------------|-----------------|---------------------------------------------------------|
|                              | Numbers<br>(95% UI)       |                           | Age-standardized rates per 100,000<br>(95% UI) |                 | Percentage change of age-standardized rates<br>(95% UI) |
|                              | (Year 1990)               | (Year 2019)               | (Year 1990)                                    | (Year 2019)     | (Year 1990–Year 2019)                                   |
| Nauru                        | 3 (2 to 4)                | 3 (2 to 4)                | 41 (28 to 56)                                  | 40 (28 to 55)   | -1.4% (-7% to 5.1%)                                     |
| Niue                         | 1 (1 to 1)                | 1 (1 to 1)                | 37 (26 to 51)                                  | 39 (28 to 52)   | 4.2% (-2.8% to 11.9%)                                   |
| Northern Mariana Islands     | 19 (13 to 26)             | 22 (16 to 30)             | 53 (37 to 72)                                  | 42 (30 to 57)   | -20.1% (-24.4% to -15.6%)                               |
| Palau                        | 6 (4 to 8)                | 10 (7 to 14)              | 44 (31 to 59)                                  | 45 (32 to 61)   | 3.1% (-2.3% to 8.7%)                                    |
| Papua New Guinea             | 1430 (996 to 1950)        | 4562 (3302 to 6098)       | 51 (36 to 69)                                  | 63 (45 to 84)   | 23% (16.5% to 30.4%)                                    |
| Samoa                        | 62 (43 to 84)             | 114 (84 to 150)           | 53 (37 to 72)                                  | 64 (47 to 85)   | 20.6% (13% to 30.8%)                                    |
| Solomon Islands              | 112 (78 to 152)           | 284 (200 to 381)          | 53 (37 to 72)                                  | 60 (42 to 81)   | 12% (6.4% to 18.1%)                                     |
| Tokelau                      | 0 (0 to 1)                | 0 (0 to 1)                | 34 (23 to 46)                                  | 36 (25 to 48)   | 5.7% (0.1% to 12.2%)                                    |
| Tonga                        | 32 (23 to 44)             | 41 (29 to 55)             | 46 (33 to 63)                                  | 46 (33 to 63)   | 0.4% (-5.5% to 7.6%)                                    |
| Tuvalu                       | 3 (2 to 4)                | 4 (3 to 5)                | 34 (23 to 46)                                  | 36 (25 to 48)   | 16.2% (9.2% to 25%)                                     |
| Vanuatu                      | 46 (32 to 62)             | 120 (87 to 160)           | 45 (31 to 60)                                  | 52 (37 to 69)   | 5.9% (-0.4% to 13.1%)                                   |
| North Africa and Middle East | 201450 (145412 to 269033) | 453033 (331629 to 604021) | 79 (57 to 104)                                 | 80 (59 to 107)  | 1.9% (-3.5% to 5.4%)                                    |
| North Africa and Middle East | 201450 (145412 to 269033) | 453033 (331629 to 604021) | 79 (57 to 104)                                 | 80 (59 to 107)  | 1.9% (-3.5% to 5.4%)                                    |
| Afghanistan                  | 11856 (5273 to 28707)     | 25411 (16490 to 40529)    | 129 (60 to 299)                                | 106 (66 to 177) | -18.2% (-43.5% to 22.8%)                                |
| Algeria                      | 14814 (10463 to 20007)    | 29937 (21475 to 40072)    | 83 (58 to 112)                                 | 74 (53 to 99)   | -10.6% (-14.9% to -6%)                                  |
| Bahrain                      | 293 (204 to 395)          | 1239 (871 to 1704)        | 69 (48 to 93)                                  | 71 (50 to 97)   | 3.6% (-2.3% to 9.8%)                                    |
| Egypt                        | 24219 (16935 to 32991)    | 50341 (35383 to 68471)    | 56 (40 to 76)                                  | 59 (41 to 79)   | 4% (-2.1% to 10.7%)                                     |
| Iran (Islamic Republic of)   | 46118 (33452 to 61797)    | 70192 (52341 to 93184)    | 111 (81 to 147)                                | 80 (60 to 106)  | -28.1% (-34.8% to -23.2%)                               |

1  
2  
3  
4  
5  
6  
7  
8  
9  
10  
11  
12  
13  
14  
15  
16  
17  
18  
19  
20  
21  
22  
23  
24  
25  
26  
27  
28  
29  
30  
31  
32  
33  
34  
35  
36  
37  
38  
39  
40  
41  
42  
43  
44  
45  
46

| Location             | YLD                    |                        |                                                |                  |                                                         |
|----------------------|------------------------|------------------------|------------------------------------------------|------------------|---------------------------------------------------------|
|                      | Numbers<br>(95% UI)    |                        | Age-standardized rates per 100,000<br>(95% UI) |                  | Percentage change of age-standardized rates<br>(95% UI) |
|                      | (Year 1990)            | (Year 2019)            | (Year 1990)                                    | (Year 2019)      | (Year 1990–Year 2019)                                   |
| Iraq                 | 15785 (10889 to 22572) | 37310 (26823 to 50871) | 132 (90 to 187)                                | 106 (76 to 143)  | -19.9% (-30.1% to -10.6%)                               |
| Jordan               | 1528 (1062 to 2076)    | 5884 (4095 to 7991)    | 62 (43 to 84)                                  | 59 (41 to 80)    | -3.9% (-8.6% to 1%)                                     |
| Kuwait               | 1316 (926 to 1822)     | 3711 (2638 to 5012)    | 92 (65 to 126)                                 | 81 (58 to 109)   | -12% (-18% to -6.7%)                                    |
| Lebanon              | 3035 (1991 to 4851)    | 4026 (2849 to 5569)    | 109 (72 to 173)                                | 76 (54 to 105)   | -30.4% (-42.8% to -18%)                                 |
| Libya                | 2352 (1663 to 3166)    | 6320 (4603 to 8529)    | 83 (59 to 112)                                 | 91 (66 to 123)   | 9.9% (3.2% to 18.6%)                                    |
| Morocco              | 14032 (9792 to 19007)  | 26514 (18727 to 35851) | 72 (50 to 98)                                  | 74 (52 to 100)   | 2.5% (-2.9% to 7.6%)                                    |
| Oman                 | 1432 (995 to 1957)     | 4246 (2938 to 5805)    | 106 (74 to 144)                                | 100 (70 to 136)  | -5.4% (-9.6% to -0.8%)                                  |
| Palestine            | 1291 (914 to 1828)     | 3728 (2642 to 5148)    | 88 (64 to 122)                                 | 97 (69 to 133)   | 10.2% (2.1% to 17.8%)                                   |
| Qatar                | 434 (302 to 599)       | 2857 (1994 to 3911)    | 109 (76 to 149)                                | 97 (68 to 132)   | -10.5% (-14.8% to -6.2%)                                |
| Saudi Arabia         | 13403 (9420 to 18276)  | 55075 (38616 to 75312) | 125 (88 to 170)                                | 156 (109 to 212) | 25% (20.1% to 29.7%)                                    |
| Sudan                | 4890 (3454 to 6758)    | 10734 (7768 to 14444)  | 35 (25 to 48)                                  | 37 (27 to 50)    | 4.9% (-1.9% to 12.7%)                                   |
| Syrian Arab Republic | 4817 (3388 to 6570)    | 15764 (10567 to 23012) | 56 (40 to 76)                                  | 116 (76 to 170)  | 107.7% (51.8% to 211.9%)                                |
| Tunisia              | 4665 (3256 to 6345)    | 9380 (6559 to 12772)   | 71 (49 to 96)                                  | 73 (51 to 99)    | 3.5% (-1.5% to 8.8%)                                    |
| Turkey               | 28204 (19754 to 38200) | 62842 (45196 to 84968) | 58 (41 to 79)                                  | 69 (50 to 93)    | 18.9% (12.6% to 26.1%)                                  |
| United Arab Emirates | 1418 (986 to 1951)     | 9976 (6962 to 13671)   | 92 (64 to 125)                                 | 87 (61 to 119)   | -4.9% (-9.5% to 0%)                                     |
| Yemen                | 5412 (3882 to 7267)    | 17087 (12086 to 23384) | 64 (46 to 87)                                  | 75 (54 to 101)   | 16.7% (4.8% to 33.9%)                                   |

| Location                    | YLD                        |                              |                                                |                  |                                                         |
|-----------------------------|----------------------------|------------------------------|------------------------------------------------|------------------|---------------------------------------------------------|
|                             | Numbers<br>(95% UI)        |                              | Age-standardized rates per 100,000<br>(95% UI) |                  | Percentage change of age-standardized rates<br>(95% UI) |
|                             | (Year 1990)                | (Year 2019)                  | (Year 1990)                                    | (Year 2019)      | (Year 1990–Year 2019)                                   |
| South Asia                  | 860069 (604623 to 1163495) | 2190818 (1536215 to 2967664) | 109 (77 to 147)                                | 135 (95 to 183)  | 24.4% (22.8% to 26.1%)                                  |
| South Asia                  | 860069 (604623 to 1163495) | 2190818 (1536215 to 2967664) | 109 (77 to 147)                                | 135 (95 to 183)  | 24.4% (22.8% to 26.1%)                                  |
| Bangladesh                  | 53822 (37633 to 73397)     | 137433 (96855 to 186188)     | 75 (52 to 102)                                 | 91 (64 to 123)   | 22% (16.9% to 27.6%)                                    |
| Bhutan                      | 364 (257 to 500)           | 802 (568 to 1096)            | 90 (63 to 123)                                 | 116 (82 to 158)  | 28.5% (23.3% to 34.2%)                                  |
| India                       | 742455 (522650 to 1003627) | 1870307 (1310196 to 2531657) | 118 (83 to 160)                                | 145 (102 to 196) | 22.9% (21.2% to 24.6%)                                  |
| Nepal                       | 10938 (7623 to 14857)      | 25880 (18657 to 34764)       | 81 (57 to 110)                                 | 98 (71 to 132)   | 20.5% (15.2% to 26.7%)                                  |
| Pakistan                    | 52490 (36788 to 71199)     | 156397 (110431 to 211564)    | 70 (49 to 95)                                  | 96 (68 to 129)   | 36% (32.2% to 40.3%)                                    |
| Sub-Saharan Africa          | 172908 (123072 to 233849)  | 382150 (275687 to 515793)    | 54 (39 to 74)                                  | 55 (39 to 73)    | 0.8% (-1.4% to 2.6%)                                    |
| Southern Sub-Saharan Africa | 18861 (13201 to 25332)     | 27272 (19047 to 36610)       | 51 (36 to 68)                                  | 40 (28 to 53)    | -22% (-24% to -20%)                                     |
| Botswana                    | 290 (201 to 397)           | 807 (560 to 1087)            | 34 (24 to 46)                                  | 40 (28 to 54)    | 19.6% (12.7% to 26.9%)                                  |
| Eswatini                    | 166 (116 to 225)           | 324 (226 to 442)             | 35 (24 to 47)                                  | 38 (27 to 51)    | 7.6% (1.7% to 14%)                                      |
| Lesotho                     | 395 (274 to 534)           | 664 (463 to 898)             | 31 (22 to 41)                                  | 38 (27 to 52)    | 25.3% (17.5% to 33.6%)                                  |
| Namibia                     | 446 (322 to 597)           | 848 (603 to 1142)            | 46 (33 to 61)                                  | 46 (33 to 61)    | -1% (-9.7% to 6.7%)                                     |
| South Africa                | 15640 (10926 to 21082)     | 21643 (15178 to 28943)       | 57 (40 to 76)                                  | 41 (29 to 55)    | -27.1% (-29.1% to -24.8%)                               |
| Zimbabwe                    | 1923 (1333 to 2632)        | 2988 (2099 to 4074)          | 32 (22 to 43)                                  | 29 (20 to 39)    | -9.1% (-14.8% to -3.1%)                                 |

| Location                   | YLD                    |                           |                                                |               |                                                         |
|----------------------------|------------------------|---------------------------|------------------------------------------------|---------------|---------------------------------------------------------|
|                            | Numbers<br>(95% UI)    |                           | Age-standardized rates per 100,000<br>(95% UI) |               | Percentage change of age-standardized rates<br>(95% UI) |
|                            | (Year 1990)            | (Year 2019)               | (Year 1990)                                    | (Year 2019)   | (Year 1990–Year 2019)                                   |
| Western Sub-Saharan Africa | 56254 (39560 to 76157) | 146349 (103313 to 197859) | 47 (33 to 63)                                  | 52 (37 to 70) | 12.4% (11.1% to 14.1%)                                  |
| Benin                      | 1374 (955 to 1870)     | 4004 (2807 to 5466)       | 50 (35 to 68)                                  | 54 (38 to 73) | 8.8% (3.5% to 14.6%)                                    |
| Burkina Faso               | 2600 (1819 to 3556)    | 7705 (5360 to 10461)      | 46 (32 to 62)                                  | 58 (40 to 78) | 25.2% (19.5% to 31.5%)                                  |
| Cabo Verde                 | 101 (70 to 137)        | 254 (177 to 344)          | 41 (29 to 56)                                  | 50 (35 to 68) | 22.4% (15.8% to 29.1%)                                  |
| Cameroon                   | 3755 (2637 to 5061)    | 11816 (8246 to 16095)     | 60 (42 to 81)                                  | 64 (46 to 88) | 7.8% (3.1% to 13%)                                      |
| Chad                       | 1764 (1273 to 2365)    | 4729 (3386 to 6432)       | 47 (34 to 63)                                  | 55 (40 to 74) | 17.9% (9.9% to 25.4%)                                   |
| Côte d'Ivoire              | 3492 (2397 to 4736)    | 9078 (6327 to 12400)      | 52 (36 to 70)                                  | 54 (38 to 73) | 5.2% (0.1% to 10.7%)                                    |
| Gambia                     | 244 (173 to 331)       | 638 (451 to 866)          | 44 (31 to 59)                                  | 46 (33 to 63) | 5.5% (-0.3% to 10.9%)                                   |
| Ghana                      | 5052 (3515 to 6960)    | 15368 (10684 to 20817)    | 54 (38 to 73)                                  | 66 (46 to 89) | 22.3% (16.8% to 28.2%)                                  |
| Guinea                     | 1931 (1370 to 2598)    | 4240 (2937 to 5743)       | 47 (33 to 63)                                  | 55 (38 to 74) | 17.4% (11.5% to 23.4%)                                  |
| Guinea-Bissau              | 361 (250 to 492)       | 754 (523 to 1012)         | 58 (41 to 79)                                  | 62 (43 to 84) | 6.1% (1.4% to 11.3%)                                    |
| Liberia                    | 782 (513 to 1233)      | 1578 (1139 to 2109)       | 53 (36 to 78)                                  | 49 (36 to 66) | -7.3% (-22.1% to 4.6%)                                  |
| Mali                       | 2508 (1739 to 3419)    | 6452 (4613 to 8736)       | 46 (32 to 62)                                  | 52 (37 to 70) | 12.8% (5.9% to 21.5%)                                   |
| Mauritania                 | 926 (640 to 1265)      | 1800 (1249 to 2459)       | 70 (49 to 95)                                  | 65 (46 to 89) | -6.2% (-10.4% to -1.6%)                                 |
| Niger                      | 1989 (1391 to 2690)    | 5650 (3980 to 7687)       | 45 (31 to 61)                                  | 47 (33 to 64) | 5.3% (-0.3% to 10.8%)                                   |
| Nigeria                    | 25033 (17488 to 33851) | 60912 (42958 to 82353)    | 43 (30 to 57)                                  | 47 (33 to 63) | 10.4% (8.8% to 12.8%)                                   |
| Sao Tome and Principe      | 36 (25 to 48)          | 82 (57 to 111)            | 45 (32 to 61)                                  | 55 (38 to 75) | 21.6% (15.4% to 28.1%)                                  |
| Senegal                    | 2061 (1436 to 2812)    | 5031 (3527 to 6891)       | 46 (32 to 62)                                  | 50 (35 to 68) | 9.1% (3.6% to 14.7%)                                    |
| Sierra Leone               | 1105 (770 to 1503)     | 3084 (2249 to 4110)       | 45 (32 to 61)                                  | 58 (42 to 76) | 27.1% (17.3% to 41.7%)                                  |
| Togo                       | 1138 (798 to 1566)     | 3173 (2211 to 4304)       | 54 (38 to 74)                                  | 57 (40 to 77) | 4.4% (-0.3% to 9.1%)                                    |

1  
2  
3  
4  
5  
6  
7  
8  
9  
10  
11  
12  
13  
14  
15  
16  
17  
18  
19  
20  
21  
22  
23  
24  
25  
26  
27  
28  
29  
30  
31  
32  
33  
34  
35  
36  
37  
38  
39  
40  
41  
42  
43  
44  
45  
46

| Location                          | YLD                     |                           |                                                |                 |                                                         |
|-----------------------------------|-------------------------|---------------------------|------------------------------------------------|-----------------|---------------------------------------------------------|
|                                   | Numbers<br>(95% UI)     |                           | Age-standardized rates per 100,000<br>(95% UI) |                 | Percentage change of age-standardized rates<br>(95% UI) |
|                                   | (Year 1990)             | (Year 2019)               | (Year 1990)                                    | (Year 2019)     | (Year 1990–Year 2019)                                   |
| <b>Eastern Sub-Saharan Africa</b> | 78366 (56234 to 106623) | 158772 (115632 to 212654) | 64 (46 to 86)                                  | 61 (44 to 81)   | -4.6% (-8.9% to -1.8%)                                  |
| Burundi                           | 2385 (1658 to 3269)     | 8672 (6103 to 12139)      | 67 (47 to 92)                                  | 111 (79 to 154) | 64.9% (29% to 133.1%)                                   |
| Comoros                           | 205 (145 to 279)        | 430 (301 to 588)          | 68 (48 to 93)                                  | 71 (50 to 97)   | 4.8% (0.1% to 9.6%)                                     |
| Djibouti                          | 166 (114 to 227)        | 546 (386 to 741)          | 59 (41 to 79)                                  | 59 (42 to 80)   | 0.9% (-4% to 6.5%)                                      |
| Eritrea                           | 2364 (1357 to 4220)     | 3231 (2346 to 4468)       | 104 (65 to 169)                                | 73 (54 to 102)  | -29.2% (-44.5% to -10.6%)                               |
| Ethiopia                          | 29635 (20754 to 41581)  | 46122 (32994 to 62059)    | 85 (61 to 117)                                 | 70 (51 to 93)   | -18.3% (-26.5% to -12%)                                 |
| Kenya                             | 8064 (5612 to 10876)    | 22105 (15512 to 29939)    | 61 (43 to 82)                                  | 64 (45 to 86)   | 4.7% (3.4% to 6.2%)                                     |
| Madagascar                        | 4160 (2888 to 5693)     | 9033 (6300 to 12243)      | 55 (38 to 74)                                  | 51 (36 to 69)   | -7.2% (-12.3% to -2.2%)                                 |
| Malawi                            | 2499 (1722 to 3363)     | 4867 (3373 to 6630)       | 41 (29 to 56)                                  | 41 (29 to 56)   | -0.3% (-5.5% to 5.4%)                                   |
| Mozambique                        | 6159 (4462 to 8610)     | 11785 (8413 to 15762)     | 69 (50 to 96)                                  | 69 (50 to 92)   | -0.2% (-15.2% to 10.8%)                                 |
| Rwanda                            | 3202 (2193 to 4400)     | 6728 (4867 to 9024)       | 71 (49 to 96)                                  | 75 (55 to 100)  | 6.4% (-8.7% to 37.8%)                                   |
| Somalia                           | 2245 (1540 to 3269)     | 6429 (4643 to 8636)       | 50 (34 to 69)                                  | 52 (38 to 70)   | 5.7% (-6.7% to 16%)                                     |
| South Sudan                       | 2292 (1640 to 3060)     | 3706 (2671 to 4957)       | 63 (45 to 83)                                  | 63 (45 to 83)   | 0% (-6.6% to 8%)                                        |
| Uganda                            | 5627 (4051 to 7768)     | 12677 (9152 to 16970)     | 52 (38 to 71)                                  | 54 (39 to 72)   | 2.7% (-10.1% to 12.9%)                                  |
| United Republic of Tanzania       | 7487 (5161 to 10080)    | 17639 (12368 to 24008)    | 47 (32 to 64)                                  | 48 (34 to 65)   | 2.8% (-2.6% to 8.2%)                                    |
| Zambia                            | 1817 (1268 to 2473)     | 4675 (3269 to 6385)       | 39 (27 to 53)                                  | 41 (29 to 56)   | 4.4% (-1.2% to 10.4%)                                   |
| <b>Central Sub-Saharan Africa</b> | 19427 (14018 to 26234)  | 49757 (36254 to 66187)    | 53 (38 to 71)                                  | 57 (42 to 77)   | 7.8% (3.3% to 13.1%)                                    |



1  
2  
3  
4  
5  
6  
7  
8  
9  
10  
11  
12  
13  
14  
15  
16  
17  
18  
19  
20  
21  
22  
23  
24  
25  
26  
27  
28  
29  
30  
31  
32  
33  
34  
35  
36  
37  
38  
39  
40  
41  
42  
43  
44  
45  
46

| Location                         | YLD                   |                        |                                                |               |                                                         |
|----------------------------------|-----------------------|------------------------|------------------------------------------------|---------------|---------------------------------------------------------|
|                                  | Numbers<br>(95% UI)   |                        | Age-standardized rates per 100,000<br>(95% UI) |               | Percentage change of age-standardized rates<br>(95% UI) |
|                                  | (Year 1990)           | (Year 2019)            | (Year 1990)                                    | (Year 2019)   | (Year 1990–Year 2019)                                   |
| Angola                           | 5060 (3578 to 6975)   | 12323 (9051 to 16261)  | 69 (50 to 93)                                  | 66 (49 to 87) | -3.9% (-11.9% to 4.3%)                                  |
| Central African Republic         | 759 (532 to 1029)     | 2060 (1512 to 2777)    | 41 (29 to 56)                                  | 54 (40 to 71) | 29.1% (15.9% to 50.3%)                                  |
| Congo                            | 783 (546 to 1064)     | 2309 (1677 to 3084)    | 49 (34 to 67)                                  | 57 (42 to 76) | 17% (5.6% to 34.8%)                                     |
| Democratic Republic of the Congo | 12283 (8662 to 16696) | 31757 (22970 to 42327) | 50 (35 to 67)                                  | 55 (39 to 72) | 9.6% (2.6% to 19.6%)                                    |
| Equatorial Guinea                | 126 (88 to 169)       | 474 (334 to 646)       | 44 (31 to 59)                                  | 52 (37 to 71) | 18.4% (12.1% to 24.5%)                                  |
| Gabon                            | 418 (293 to 569)      | 834 (582 to 1128)      | 59 (41 to 79)                                  | 59 (41 to 80) | 0.8% (-3.8% to 6.1%)                                    |

Abbreviations: YLDs, years lived with disability; UI, uncertainty interval

Table 11. Incidence of spinal cord injury in 1990 and 2019, and percentage changes of age-standardized rates by location, 1990–2019

|                                  | Incidence                 |                            |                                                |               |                                                         |
|----------------------------------|---------------------------|----------------------------|------------------------------------------------|---------------|---------------------------------------------------------|
|                                  | Numbers<br>(95% UI)       |                            | Age-standardized rates per 100,000<br>(95% UI) |               | Percentage change of age-standardized rates<br>(95% UI) |
|                                  | (Year 1990)               | (Year 2019)                | (Year 1990)                                    | (Year 2019)   | (Year 1990–Year 2019)                                   |
|                                  |                           |                            |                                                |               |                                                         |
| <b>Global</b>                    | 595228 (471497 to 766656) | 909001 (706953 to 1156410) | 12 (10 to 16)                                  | 12 (9 to 15)  | -6.1% (-17.3% to 1.5%)                                  |
| <b>High-income</b>               | 144467 (114653 to 181721) | 218207 (166751 to 289330)  | 14 (11 to 18)                                  | 14 (11 to 18) | -0.8% (-4.3% to 2.4%)                                   |
| <b>High-income North America</b> | 67501 (52610 to 87116)    | 114001 (85370 to 155645)   | 22 (17 to 28)                                  | 23 (17 to 30) | 4.6% (-0.9% to 10.5%)                                   |
| Canada                           | 2827 (2314 to 3453)       | 5431 (4270 to 6912)        | 10 (8 to 12)                                   | 10 (8 to 13)  | 6.2% (0.6% to 11.9%)                                    |
| Greenland                        | 17 (13 to 22)             | 19 (15 to 26)              | 39 (29 to 50)                                  | 32 (24 to 43) | -17.0% (-20.6% to -13.7%)                               |
| United States of America         | 64655 (50213 to 83656)    | 108549 (80631 to 149208)   | 23 (18 to 29)                                  | 24 (18 to 32) | 5.1% (-0.7% to 11.4%)                                   |
| <b>Australasia</b>               | 2714 (2200 to 3280)       | 4996 (3949 to 6243)        | 13 (11 to 16)                                  | 14 (11 to 17) | 8.1% (3.3% to 13.2%)                                    |
| Australia                        | 2175 (1760 to 2635)       | 4146 (3277 to 5191)        | 13 (10 to 15)                                  | 14 (11 to 17) | 9.5% (4.1% to 15.2%)                                    |
| New Zealand                      | 539 (439 to 658)          | 850 (675 to 1072)          | 15 (12 to 19)                                  | 16 (13 to 19) | 3.8% (-0.7% to 8.5%)                                    |
| <b>High-income Asia Pacific</b>  | 24139 (19331 to 29846)    | 32690 (25123 to 43125)     | 13 (11 to 16)                                  | 12 (9 to 15)  | -9.8% (-13.9% to -6.4%)                                 |
| Brunei Darussalam                | 19 (16 to 23)             | 32 (26 to 38)              | 9 (7 to 10)                                    | 8 (6 to 9)    | -8.5% (-13.8% to -3.9%)                                 |
| Japan                            | 19707 (15505 to 24733)    | 26116 (19727 to 35484)     | 14 (11 to 18)                                  | 13 (10 to 17) | -7.7% (-11.8% to -4.3%)                                 |
| Republic of Korea                | 4182 (3485 to 4986)       | 6124 (4942 to 7543)        | 10 (8 to 12)                                   | 9 (8 to 12)   | -3.4% (-10.6% to 3.3%)                                  |
| Singapore                        | 230 (191 to 276)          | 418 (340 to 504)           | 7 (6 to 9)                                     | 7 (6 to 8)    | -7.0% (-10.6% to -3.5%)                                 |
| <b>Western Europe</b>            | 46448 (36453 to 59098)    | 61215 (45912 to 80682)     | 10 (8 to 13)                                   | 10 (8 to 12)  | -5.6% (-9.8% to -2.2%)                                  |
| Andorra                          | 5 (4 to 7)                | 12 (9 to 15)               | 10 (8 to 13)                                   | 11 (8 to 14)  | 2.9% (-0.8% to 7.0%)                                    |

1

2

3

4

5

6

7

8

9

10

11

12

13

14

15

16

17

18

19

20

21

22

23

24

25

26

27

28

29

30

31

32

33

34

35

36

37

38

39

40

41

42

43

44

45

46

|             | Incidence            |                       |                                                |               |                                                         |
|-------------|----------------------|-----------------------|------------------------------------------------|---------------|---------------------------------------------------------|
|             | Numbers<br>(95% UI)  |                       | Age-standardized rates per 100,000<br>(95% UI) |               | Percentage change of age-standardized rates<br>(95% UI) |
|             | (Year 1990)          | (Year 2019)           | (Year 1990)                                    | (Year 2019)   | (Year 1990–Year 2019)                                   |
| Austria     | 1011 (796 to 1274)   | 1209 (922 to 1575)    | 11 (9 to 14)                                   | 10 (8 to 12)  | -11.0% (-15.4% to -6.6%)                                |
| Belgium     | 1221 (966 to 1531)   | 1992 (1500 to 2628)   | 11 (9 to 13)                                   | 12 (9 to 15)  | 13.8% (6.7% to 19.7%)                                   |
| Cyprus      | 67 (54 to 81)        | 135 (105 to 173)      | 9 (7 to 11)                                    | 9 (7 to 12)   | 5.4% (-0.8% to 11.1%)                                   |
| Denmark     | 752 (577 to 978)     | 657 (505 to 851)      | 11 (9 to 14)                                   | 9 (7 to 11)   | -23.5% (-27.8% to -18.8%)                               |
| Finland     | 800 (635 to 1014)    | 995 (754 to 1300)     | 14 (11 to 18)                                  | 13 (10 to 16) | -9.0% (-13.3% to -4.7%)                                 |
| France      | 7961 (6227 to 10235) | 10840 (8157 to 14346) | 12 (9 to 15)                                   | 11 (9 to 14)  | -6.5% (-11.3% to -2.2%)                                 |
| Germany     | 8658 (6811 to 10987) | 11418 (8599 to 15121) | 9 (7 to 11)                                    | 9 (7 to 11)   | -1.3% (-6.3% to 3.3%)                                   |
| Greece      | 912 (738 to 1121)    | 897 (711 to 1125)     | 8 (7 to 10)                                    | 7 (6 to 9)    | -11.0% (-14.9% to -7.3%)                                |
| Iceland     | 23 (19 to 29)        | 35 (28 to 45)         | 9 (7 to 11)                                    | 9 (7 to 11)   | -2.0% (-6.7% to 2.2%)                                   |
| Ireland     | 307 (247 to 379)     | 454 (357 to 575)      | 8 (7 to 10)                                    | 8 (7 to 10)   | -0.8% (-6.2% to 3.9%)                                   |
| Israel      | 396 (315 to 513)     | 700 (560 to 870)      | 8 (6 to 10)                                    | 7 (6 to 9)    | -10.8% (-28.3% to -0.1%)                                |
| Italy       | 6984 (5309 to 9235)  | 7114 (5225 to 9725)   | 10 (8 to 13)                                   | 8 (6 to 10)   | -23.6% (-26.2% to -20.9%)                               |
| Luxembourg  | 46 (37 to 58)        | 77 (59 to 100)        | 11 (9 to 13)                                   | 10 (8 to 13)  | -7.6% (-13.0% to -2.5%)                                 |
| Malta       | 32 (26 to 40)        | 51 (39 to 66)         | 9 (7 to 11)                                    | 9 (7 to 12)   | 6.3% (2.9% to 9.7%)                                     |
| Monaco      | 8 (6 to 11)          | 11 (8 to 16)          | 18 (13 to 24)                                  | 20 (15 to 27) | 12.2% (7.6% to 16.2%)                                   |
| Netherlands | 1306 (1026 to 1627)  | 2465 (1825 to 3305)   | 8 (6 to 10)                                    | 9 (7 to 12)   | 21.1% (12.7% to 29.4%)                                  |
| Norway      | 1525 (1067 to 2203)  | 2129 (1430 to 3202)   | 26 (19 to 37)                                  | 26 (18 to 37) | -1.3% (-5.5% to 2.7%)                                   |
| Portugal    | 844 (690 to 1026)    | 912 (716 to 1160)     | 8 (6 to 9)                                     | 6 (5 to 7)    | -21.9% (-28.0% to -16.8%)                               |
| San Marino  | 5 (4 to 6)           | 9 (6 to 12)           | 18 (14 to 24)                                  | 20 (15 to 27) | 9.3% (3.5% to 14.4%)                                    |
| Spain       | 3241 (2655 to 3941)  | 4547 (3526 to 5853)   | 8 (6 to 9)                                     | 8 (6 to 10)   | -0.9% (-10.0% to 7.6%)                                  |
| Sweden      | 2789 (1953 to 4022)  | 3946 (2665 to 5921)   | 24 (17 to 32)                                  | 24 (17 to 34) | 1.8% (-3.0% to 6.6%)                                    |
| Switzerland | 1194 (929 to 1527)   | 1460 (1091 to 1923)   | 14 (11 to 18)                                  | 12 (9 to 15)  | -18.5% (-21.9% to -14.8%)                               |

1  
2  
3  
4  
5  
6  
7  
8  
9  
10  
11  
12  
13  
14  
15  
16  
17  
18  
19  
20  
21  
22  
23  
24  
25  
26  
27  
28  
29  
30  
31  
32  
33  
34  
35  
36  
37  
38  
39  
40  
41  
42  
43  
44  
45  
46

|                                                         | Incidence              |                        |                                                |               |                                                         |
|---------------------------------------------------------|------------------------|------------------------|------------------------------------------------|---------------|---------------------------------------------------------|
|                                                         | Numbers<br>(95% UI)    |                        | Age-standardized rates per 100,000<br>(95% UI) |               | Percentage change of age-standardized rates<br>(95% UI) |
|                                                         | (Year 1990)            | (Year 2019)            | (Year 1990)                                    | (Year 2019)   | (Year 1990–Year 2019)                                   |
| United Kingdom                                          | 6323 (4968 to 8043)    | 9096 (6830 to 12284)   | 10 (8 to 12)                                   | 10 (8 to 13)  | 6.0% (0.4% to 10.6%)                                    |
| <b>Southern Latin America</b>                           | 3665 (3016 to 4385)    | 5305 (4326 to 6394)    | 8 (6 to 9)                                     | 8 (6 to 9)    | 1.7% (-2.6% to 5.2%)                                    |
| Argentina                                               | 2425 (2006 to 2895)    | 3384 (2755 to 4077)    | 7 (6 to 9)                                     | 7 (6 to 9)    | -1.7% (-7.2% to 2.8%)                                   |
| Chile                                                   | 965 (798 to 1153)      | 1599 (1294 to 1955)    | 8 (6 to 9)                                     | 8 (7 to 10)   | 9.3% (4.8% to 13.5%)                                    |
| Uruguay                                                 | 275 (221 to 340)       | 322 (260 to 391)       | 9 (7 to 11)                                    | 9 (7 to 10)   | 0.1% (-6.8% to 6.4%)                                    |
| <b>Central Europe, Eastern Europe, and Central Asia</b> | 60749 (48760 to 75114) | 53570 (42822 to 66828) | 14 (11 to 18)                                  | 12 (10 to 15) | -16.9% (-19.6% to -14.4%)                               |
| <b>Eastern Europe</b>                                   | 36775 (29156 to 46344) | 30092 (23743 to 37989) | 16 (12 to 20)                                  | 13 (11 to 16) | -15.7% (-18.3% to -12.9%)                               |
| Belarus                                                 | 1441 (1168 to 1785)    | 1362 (1099 to 1674)    | 13 (11 to 16)                                  | 13 (10 to 16) | -3.7% (-10.5% to 3.3%)                                  |
| Estonia                                                 | 274 (223 to 339)       | 160 (128 to 195)       | 17 (14 to 21)                                  | 11 (9 to 13)  | -34.4% (-39.2% to -30.1%)                               |
| Latvia                                                  | 527 (423 to 652)       | 259 (209 to 320)       | 18 (15 to 23)                                  | 12 (10 to 14) | -36.6% (-40.2% to -32.9%)                               |
| Lithuania                                               | 659 (531 to 815)       | 448 (358 to 555)       | 17 (14 to 21)                                  | 13 (11 to 16) | -22.0% (-27.2% to -17.0%)                               |
| Republic of Moldova                                     | 562 (454 to 702)       | 381 (309 to 462)       | 13 (10 to 16)                                  | 10 (8 to 12)  | -23.9% (-28.2% to -19.5%)                               |
| Russian Federation                                      | 24982 (19584 to 31842) | 21366 (16720 to 27153) | 16 (13 to 20)                                  | 13 (11 to 17) | -16.2% (-19.6% to -12.6%)                               |
| Ukraine                                                 | 8330 (6687 to 10418)   | 6116 (4927 to 7659)    | 15 (12 to 19)                                  | 13 (11 to 16) | -13.3% (-16.4% to -9.3%)                                |
| <b>Central Europe</b>                                   | 19087 (15495 to 23162) | 17227 (13648 to 21504) | 15 (12 to 18)                                  | 13 (11 to 16) | -13.0% (-16.2% to -9.8%)                                |
| Albania                                                 | 357 (280 to 449)       | 307 (246 to 378)       | 11 (9 to 14)                                   | 11 (9 to 14)  | 0.5% (-7.6% to 9.0%)                                    |
| Bosnia and Herzegovina                                  | 685 (488 to 1106)      | 395 (315 to 483)       | 15 (11 to 24)                                  | 11 (9 to 14)  | -24.7% (-52.9% to -2.0%)                                |
| Bulgaria                                                | 1161 (950 to 1404)     | 858 (692 to 1043)      | 13 (11 to 16)                                  | 12 (10 to 14) | -9% (-13.4% to -5.1%)                                   |
| Croatia                                                 | 832 (670 to 1027)      | 952 (726 to 1242)      | 16 (13 to 20)                                  | 16 (13 to 20) | 0.3% (-7.2% to 8.0%)                                    |

1  
2  
3  
4  
5  
6  
7  
8  
9  
10  
11  
12  
13  
14  
15  
16  
17  
18  
19  
20  
21  
22  
23  
24  
25  
26  
27  
28  
29  
30  
31  
32  
33  
34  
35  
36  
37  
38  
39  
40  
41  
42  
43  
44  
45  
46

|                                    | Incidence              |                        |                                                |               |                                                         |
|------------------------------------|------------------------|------------------------|------------------------------------------------|---------------|---------------------------------------------------------|
|                                    | Numbers<br>(95% UI)    |                        | Age-standardized rates per 100,000<br>(95% UI) |               | Percentage change of age-standardized rates<br>(95% UI) |
|                                    | (Year 1990)            | (Year 2019)            | (Year 1990)                                    | (Year 2019)   | (Year 1990–Year 2019)                                   |
| Czechia                            | 2133 (1690 to 2694)    | 1845 (1461 to 2299)    | 19 (15 to 23)                                  | 14 (12 to 18) | -22.2% (-26.2% to -18.3%)                               |
| Hungary                            | 2243 (1764 to 2836)    | 1657 (1300 to 2100)    | 19 (15 to 24)                                  | 14 (11 to 17) | -28.0% (-31.8% to -24.1%)                               |
| Montenegro                         | 80 (65 to 97)          | 86 (69 to 105)         | 13 (10 to 15)                                  | 13 (10 to 15) | 0.6% (-2.2% to 3.3%)                                    |
| North Macedonia                    | 197 (160 to 240)       | 247 (197 to 301)       | 10 (8 to 12)                                   | 11 (9 to 13)  | 13.6% (6.3% to 21.3%)                                   |
| Poland                             | 5733 (4558 to 7097)    | 5981 (4676 to 7524)    | 15 (12 to 18)                                  | 13 (11 to 17) | -8.3% (-12.4% to -4.2%)                                 |
| Romania                            | 3310 (2715 to 3957)    | 2425 (1962 to 2953)    | 14 (11 to 16)                                  | 12 (9 to 14)  | -15.6% (-19.5% to -11.5%)                               |
| Serbia                             | 1074 (868 to 1324)     | 1082 (873 to 1327)     | 11 (9 to 14)                                   | 11 (9 to 14)  | 0.7% (-6.3% to 7.6%)                                    |
| Slovakia                           | 870 (701 to 1066)      | 928 (735 to 1145)      | 16 (13 to 19)                                  | 15 (12 to 18) | -7.5% (-11.9% to -3.5%)                                 |
| Slovenia                           | 411 (329 to 510)       | 466 (364 to 597)       | 19 (15 to 24)                                  | 17 (13 to 20) | -14.2% (-20.0% to -9.1%)                                |
| <b>Central Asia</b>                | 4887 (4059 to 5797)    | 6252 (5146 to 7468)    | 7 (6 to 9)                                     | 7 (6 to 8)    | -6.8% (-9.5% to -4.3%)                                  |
| Armenia                            | 294 (243 to 352)       | 192 (159 to 231)       | 9 (7 to 10)                                    | 6 (5 to 7)    | -28.8% (-34.4% to -24.1%)                               |
| Azerbaijan                         | 472 (391 to 570)       | 590 (485 to 708)       | 6 (5 to 8)                                     | 6 (5 to 7)    | -10.8% (-17.5% to -5.3%)                                |
| Georgia                            | 455 (375 to 545)       | 343 (280 to 418)       | 8 (7 to 10)                                    | 9 (7 to 11)   | 9.9% (4.9% to 15.0%)                                    |
| Kazakhstan                         | 1384 (1137 to 1671)    | 1558 (1281 to 1873)    | 8 (7 to 10)                                    | 8 (7 to 10)   | -0.3% (-4.1% to 3.5%)                                   |
| Kyrgyzstan                         | 327 (271 to 389)       | 391 (322 to 474)       | 8 (6 to 9)                                     | 6 (5 to 7)    | -20.7% (-24.8% to -16.4%)                               |
| Mongolia                           | 147 (122 to 175)       | 275 (226 to 330)       | 7 (6 to 9)                                     | 8 (7 to 10)   | 10.8% (3.7% to 16.7%)                                   |
| Tajikistan                         | 351 (292 to 416)       | 498 (414 to 595)       | 7 (6 to 8)                                     | 5 (4 to 6)    | -23.1% (-27.8% to -19.1%)                               |
| Turkmenistan                       | 208 (173 to 249)       | 285 (237 to 341)       | 6 (5 to 7)                                     | 6 (5 to 7)    | -2.4% (-8.0% to 3.2%)                                   |
| Uzbekistan                         | 1249 (1049 to 1482)    | 2119 (1744 to 2552)    | 6 (5 to 7)                                     | 6 (5 to 8)    | 3.0% (-1.0% to 7.0%)                                    |
| <b>Latin America and Caribbean</b> | 45415 (36265 to 57008) | 64555 (50629 to 82893) | 13 (10 to 16)                                  | 11 (9 to 14)  | -15.4% (-24.7% to -10.6%)                               |
| <b>Central Latin America</b>       | 19015 (14979 to 24183) | 24749 (19700 to 30982) | 13 (10 to 17)                                  | 10 (8 to 13)  | -23.4% (-34.3% to -17.9%)                               |
| Colombia                           | 3049 (2237 to 4529)    | 2768 (2213 to 3431)    | 10 (7 to 14)                                   | 6 (5 to 7)    | -40.6% (-58.5% to -27.4%)                               |

1  
2  
3  
4  
5  
6  
7  
8  
9  
10  
11  
12  
13  
14  
15  
16  
17  
18  
19  
20  
21  
22  
23  
24  
25  
26  
27  
28  
29  
30  
31  
32  
33  
34  
35  
36  
37  
38  
39  
40  
41  
42  
43  
44  
45  
46

|                                    | Incidence             |                        |                                                |               |                                                         |
|------------------------------------|-----------------------|------------------------|------------------------------------------------|---------------|---------------------------------------------------------|
|                                    | Numbers<br>(95% UI)   |                        | Age-standardized rates per 100,000<br>(95% UI) |               | Percentage change of age-standardized rates<br>(95% UI) |
|                                    | (Year 1990)           | (Year 2019)            | (Year 1990)                                    | (Year 2019)   | (Year 1990–Year 2019)                                   |
| Costa Rica                         | 172 (140 to 211)      | 303 (246 to 371)       | 6 (5 to 8)                                     | 6 (5 to 8)    | -0.6% (-4.1% to 3.8%)                                   |
| El Salvador                        | 943 (445 to 2252)     | 413 (332 to 515)       | 17 (9 to 40)                                   | 7 (5 to 8)    | -61.9% (-83.5% to -24.9%)                               |
| Guatemala                          | 871 (500 to 1724)     | 1011 (825 to 1215)     | 11 (7 to 21)                                   | 6 (5 to 7)    | -44.3% (-72.1% to -10.8%)                               |
| Honduras                           | 229 (186 to 276)      | 511 (407 to 632)       | 5 (4 to 6)                                     | 5 (4 to 7)    | 7.2% (1.0% to 14.3%)                                    |
| Mexico                             | 12232 (9539 to 15778) | 17497 (13364 to 22764) | 17 (13 to 22)                                  | 14 (11 to 19) | -16.1% (-17.6% to -14.6%)                               |
| Nicaragua                          | 210 (162 to 286)      | 292 (240 to 353)       | 6 (4 to 7)                                     | 5 (4 to 6)    | -14.0% (-33.4% to -1.3%)                                |
| Panama                             | 125 (101 to 154)      | 218 (176 to 265)       | 6 (4 to 7)                                     | 5 (4 to 6)    | -5.9% (-10.3% to -0.9%)                                 |
| Venezuela (Bolivarian Republic of) | 1184 (951 to 1472)    | 1736 (1400 to 2127)    | 7 (5 to 8)                                     | 6 (5 to 8)    | -6.7% (-13.0% to -0.5%)                                 |
| <b>Andean Latin America</b>        | 2898 (1837 to 5488)   | 2871 (2381 to 3389)    | 8 (5 to 14)                                    | 5 (4 to 5)    | -39.5% (-66.5% to -11.2%)                               |
| Bolivia (Plurinational State of)   | 249 (208 to 292)      | 487 (405 to 572)       | 4 (4 to 5)                                     | 4 (4 to 5)    | 2.5% (-3.2% to 7.9%)                                    |
| Ecuador                            | 429 (362 to 506)      | 912 (763 to 1078)      | 5 (4 to 6)                                     | 5 (4 to 6)    | 14.7% (9.9% to 19.4%)                                   |
| Peru                               | 2220 (1205 to 4832)   | 1473 (1223 to 1748)    | 10 (6 to 21)                                   | 4 (4 to 5)    | -56.3% (-78.9% to -23.7%)                               |
| <b>Caribbean</b>                   | 2137 (1747 to 2618)   | 3459 (2814 to 4227)    | 7 (5 to 8)                                     | 7 (6 to 9)    | 8.2% (0.9% to 15.1%)                                    |
| Antigua and Barbuda                | 3 (2 to 3)            | 4 (3 to 5)             | 4 (3 to 5)                                     | 5 (4 to 6)    | 11.7% (6.5% to 17.3%)                                   |
| Bahamas                            | 11 (9 to 14)          | 19 (16 to 23)          | 5 (4 to 6)                                     | 5 (4 to 6)    | 8.1% (0.9% to 14.5%)                                    |
| Barbados                           | 11 (9 to 13)          | 14 (12 to 17)          | 4 (3 to 5)                                     | 4 (4 to 5)    | 9.5% (3.6% to 15.6%)                                    |
| Belize                             | 11 (8 to 19)          | 21 (17 to 26)          | 6 (4 to 9)                                     | 5 (4 to 7)    | -9.5% (-41.1% to 13.8%)                                 |
| Bermuda                            | 6 (5 to 8)            | 9 (7 to 12)            | 11 (8 to 14)                                   | 12 (9 to 15)  | 9.3% (-1.2% to 20.5%)                                   |
| Cuba                               | 773 (629 to 944)      | 1263 (985 to 1628)     | 7 (6 to 9)                                     | 8 (7 to 10)   | 17.7% (6.3% to 28.6%)                                   |
| Dominica                           | 3 (2 to 4)            | 3 (3 to 4)             | 4 (3 to 5)                                     | 4 (4 to 5)    | 7.9% (3.3% to 12.2%)                                    |
| Dominican Republic                 | 282 (222 to 358)      | 587 (460 to 736)       | 4 (3 to 5)                                     | 5 (4 to 7)    | 31.8% (26.4% to 37.7%)                                  |
| Grenada                            | 4 (3 to 4)            | 5 (4 to 6)             | 4 (3 to 5)                                     | 5 (4 to 6)    | 21.7% (14.2% to 28.6%)                                  |
| Guyana                             | 37 (31 to 44)         | 46 (39 to 55)          | 6 (5 to 7)                                     | 6 (5 to 8)    | 14.9% (11.5% to 18.4%)                                  |

1  
2  
3  
4  
5  
6  
7  
8  
9  
10  
11  
12  
13  
14  
15  
16  
17  
18  
19  
20  
21  
22  
23  
24  
25  
26  
27  
28  
29  
30  
31  
32  
33  
34  
35  
36  
37  
38  
39  
40  
41  
42  
43  
44  
45  
46

|                                               | Incidence                 |                           |                                                |               |                                                         |
|-----------------------------------------------|---------------------------|---------------------------|------------------------------------------------|---------------|---------------------------------------------------------|
|                                               | Numbers<br>(95% UI)       |                           | Age-standardized rates per 100,000<br>(95% UI) |               | Percentage change of age-standardized rates<br>(95% UI) |
|                                               | (Year 1990)               | (Year 2019)               | (Year 1990)                                    | (Year 2019)   | (Year 1990–Year 2019)                                   |
| Haiti                                         | 258 (210 to 315)          | 505 (409 to 612)          | 4 (4 to 5)                                     | 4 (4 to 5)    | -0.2% (-5.4% to 3.8%)                                   |
| Jamaica                                       | 107 (85 to 138)           | 124 (101 to 150)          | 5 (4 to 6)                                     | 4 (4 to 5)    | -5.2% (-22.3% to 5%)                                    |
| Puerto Rico                                   | 452 (349 to 580)          | 613 (459 to 804)          | 13 (10 to 16)                                  | 13 (10 to 17) | 6.0% (-3.1% to 15.8%)                                   |
| Saint Kitts and Nevis                         | 4 (3 to 6)                | 7 (5 to 9)                | 11 (9 to 14)                                   | 12 (9 to 15)  | 6.8% (0.1% to 13.2%)                                    |
| Saint Lucia                                   | 6 (5 to 8)                | 9 (7 to 11)               | 5 (4 to 6)                                     | 5 (4 to 6)    | 0.9% (-13.6% to 10.4%)                                  |
| Saint Vincent and the Grenadines              | 4 (4 to 5)                | 6 (5 to 7)                | 4 (3 to 5)                                     | 5 (4 to 6)    | 13.7% (8.2% to 19.2%)                                   |
| Suriname                                      | 16 (13 to 21)             | 28 (23 to 35)             | 4 (4 to 5)                                     | 5 (4 to 6)    | 13.3% (7.7% to 18.5%)                                   |
| Trinidad and Tobago                           | 65 (48 to 99)             | 64 (53 to 79)             | 6 (4 to 9)                                     | 5 (4 to 6)    | -19.9% (-45% to -1.2%)                                  |
| United States Virgin Islands                  | 11 (8 to 14)              | 13 (10 to 17)             | 11 (8 to 14)                                   | 11 (9 to 14)  | 4.3% (-3.6% to 12.3%)                                   |
| <b>Tropical Latin America</b>                 | 21365 (16580 to 27710)    | 33477 (25278 to 44097)    | 16 (12 to 20)                                  | 14 (11 to 19) | -8.1% (-11.5% to -5.1%)                                 |
| Brazil                                        | 21177 (16415 to 27463)    | 33118 (24962 to 43693)    | 16 (12 to 21)                                  | 15 (11 to 19) | -8.1% (-11.5% to -5.0%)                                 |
| Paraguay                                      | 188 (155 to 226)          | 359 (293 to 439)          | 5 (4 to 6)                                     | 5 (4 to 6)    | 6.0% (2.4% to 9.7%)                                     |
| <b>Southeast Asia, East Asia, and Oceania</b> | 141335 (111053 to 179070) | 284283 (211337 to 376241) | 9 (7 to 12)                                    | 12 (9 to 16)  | 25.6% (17.1% to 32.6%)                                  |
| <b>East Asia</b>                              | 104274 (79266 to 134082)  | 236241 (173443 to 315144) | 10 (7 to 13)                                   | 13 (10 to 18) | 39.8% (32.0% to 48.0%)                                  |
| China                                         | 102622 (77801 to 132131)  | 234191 (171837 to 312871) | 10 (7 to 13)                                   | 14 (10 to 19) | 40.8% (32.9% to 49.1%)                                  |
| Democratic People's Republic of Korea         | 662 (539 to 821)          | 873 (686 to 1129)         | 3 (3 to 4)                                     | 3 (2 to 4)    | -9.4% (-16.1% to -1.5%)                                 |
| Taiwan (Province of China)                    | 990 (800 to 1238)         | 1177 (934 to 1463)        | 5 (4 to 6)                                     | 4 (3 to 5)    | -23.6% (-27.2% to -19.7%)                               |
| <b>Southeast Asia</b>                         | 36808 (28373 to 48545)    | 47473 (37736 to 59770)    | 9 (7 to 12)                                    | 7 (6 to 9)    | -18.7% (-31.8% to -10.7%)                               |

1  
2  
3  
4  
5  
6  
7  
8  
9  
10  
11  
12  
13  
14  
15  
16  
17  
18  
19  
20  
21  
22  
23  
24  
25  
26  
27  
28  
29  
30  
31  
32  
33  
34  
35  
36  
37  
38  
39  
40  
41  
42  
43  
44  
45  
46

|                                  | Incidence              |                        |                                                |              |                                                         |
|----------------------------------|------------------------|------------------------|------------------------------------------------|--------------|---------------------------------------------------------|
|                                  | Numbers<br>(95% UI)    |                        | Age-standardized rates per 100,000<br>(95% UI) |              | Percentage change of age-standardized rates<br>(95% UI) |
|                                  | (Year 1990)            | (Year 2019)            | (Year 1990)                                    | (Year 2019)  | (Year 1990–Year 2019)                                   |
| Cambodia                         | 574 (386 to 1005)      | 797 (647 to 973)       | 6 (4 to 10)                                    | 5 (4 to 7)   | -12.1% (-45.5% to 16.5%)                                |
| Indonesia                        | 18250 (14109 to 23763) | 25244 (19349 to 32889) | 12 (9 to 16)                                   | 11 (8 to 14) | -11.5% (-13.7% to -9.4%)                                |
| Lao People's Democratic Republic | 305 (168 to 640)       | 279 (221 to 352)       | 8 (4 to 15)                                    | 4 (3 to 5)   | -44.8% (-72.5% to -14.3%)                               |
| Malaysia                         | 742 (575 to 955)       | 1647 (1281 to 2113)    | 5 (4 to 6)                                     | 5 (4 to 7)   | 11.3% (6.6% to 16.4%)                                   |
| Maldives                         | 7 (6 to 8)             | 19 (16 to 23)          | 4 (3 to 5)                                     | 4 (3 to 5)   | 9.2% (0.5% to 17.6%)                                    |
| Mauritius                        | 86 (66 to 113)         | 140 (107 to 183)       | 8 (6 to 11)                                    | 10 (8 to 13) | 22.6% (13.8% to 32.3%)                                  |
| Myanmar                          | 2114 (1669 to 2836)    | 2798 (2239 to 3572)    | 6 (5 to 7)                                     | 5 (4 to 7)   | -3.9% (-10.6% to 3.2%)                                  |
| Philippines                      | 4386 (3208 to 6290)    | 4962 (3991 to 6137)    | 8 (6 to 11)                                    | 5 (4 to 6)   | -38.3% (-54.2% to -22.5%)                               |
| Seychelles                       | 6 (5 to 8)             | 11 (8 to 14)           | 9 (7 to 12)                                    | 10 (8 to 13) | 9.7% (5.2% to 14.2%)                                    |
| Sri Lanka                        | 4222 (1659 to 10682)   | 1496 (1195 to 1878)    | 24 (10 to 59)                                  | 7 (5 to 8)   | -72.1% (-86.6% to -38.7%)                               |
| Thailand                         | 3095 (2432 to 3953)    | 4088 (3294 to 5010)    | 6 (5 to 7)                                     | 5 (4 to 6)   | -10.5% (-17.0% to -3.9%)                                |
| Timor-Leste                      | 142 (50 to 380)        | 46 (37 to 57)          | 17 (7 to 45)                                   | 4 (3 to 5)   | -77.2% (-91.1% to -42.1%)                               |
| Viet Nam                         | 2831 (2271 to 3514)    | 5883 (4660 to 7367)    | 5 (4 to 6)                                     | 6 (5 to 8)   | 26.2% (19.4% to 33.8%)                                  |
| <b>Oceania</b>                   | 253 (203 to 313)       | 569 (466 to 697)       | 5 (4 to 6)                                     | 5 (4 to 6)   | 10.3% (-2.6% to 19.0%)                                  |
| American Samoa                   | 4 (3 to 5)             | 5 (4 to 6)             | 9 (7 to 12)                                    | 10 (8 to 13) | 6.4% (-0.1% to 13.1%)                                   |
| Cook Islands                     | 2 (2 to 3)             | 2 (2 to 3)             | 12 (9 to 17)                                   | 11 (8 to 14) | -11.7% (-27.9% to 3.0%)                                 |
| Fiji                             | 23 (19 to 29)          | 31 (26 to 38)          | 3 (3 to 4)                                     | 4 (3 to 4)   | 7.3% (2.6% to 11.7%)                                    |
| Guam                             | 11 (9 to 15)           | 16 (13 to 21)          | 9 (7 to 12)                                    | 9 (7 to 12)  | 2.4% (-4.3% to 9.1%)                                    |
| Kiribati                         | 2 (2 to 3)             | 3 (3 to 4)             | 3 (2 to 4)                                     | 3 (3 to 4)   | 2.8% (-2.0% to 7.5%)                                    |
| Marshall Islands                 | 1 (1 to 2)             | 2 (2 to 3)             | 4 (3 to 5)                                     | 4 (4 to 5)   | 6.7% (2.7% to 10.9%)                                    |
| Micronesia (Federated States of) | 4 (3 to 4)             | 4 (3 to 5)             | 4 (3 to 5)                                     | 5 (4 to 6)   | 11.7% (6.2% to 17.6%)                                   |
| Nauru                            | 1 (1 to 1)             | 1 (1 to 1)             | 9 (7 to 12)                                    | 10 (8 to 13) | 15.2% (8.4% to 22.5%)                                   |



1  
2  
3  
4  
5  
6  
7  
8  
9  
10  
11  
12  
13  
14  
15  
16  
17  
18  
19  
20  
21  
22  
23  
24  
25  
26  
27  
28  
29  
30  
31  
32  
33  
34  
35  
36  
37  
38  
39  
40  
41  
42  
43  
44  
45  
46

|                                     | Incidence              |                        |                                                |                |                                                         |
|-------------------------------------|------------------------|------------------------|------------------------------------------------|----------------|---------------------------------------------------------|
|                                     | Numbers<br>(95% UI)    |                        | Age-standardized rates per 100,000<br>(95% UI) |                | Percentage change of age-standardized rates<br>(95% UI) |
|                                     | (Year 1990)            | (Year 2019)            | (Year 1990)                                    | (Year 2019)    | (Year 1990–Year 2019)                                   |
| Niue                                | 0 (0 to 0)             | 0 (0 to 0)             | 9 (7 to 11)                                    | 10 (8 to 13)   | 19.6% (11.0% to 28.6%)                                  |
| Northern Mariana Islands            | 5 (4 to 6)             | 6 (4 to 7)             | 12 (10 to 16)                                  | 13 (10 to 18)  | 6.9% (-3.6% to 17.6%)                                   |
| Palau                               | 2 (1 to 2)             | 3 (2 to 4)             | 14 (11 to 18)                                  | 17 (13 to 22)  | 17.1% (11.9% to 21.9%)                                  |
| Papua New Guinea                    | 154 (122 to 200)       | 414 (337 to 509)       | 5 (4 to 6)                                     | 5 (4 to 6)     | 13.7% (-4.4% to 25.1%)                                  |
| Samoa                               | 8 (6 to 11)            | 9 (7 to 11)            | 6 (4 to 8)                                     | 5 (4 to 6)     | -20.1% (-39.1% to -4.3%)                                |
| Solomon Islands                     | 13 (11 to 16)          | 31 (25 to 37)          | 5 (4 to 6)                                     | 6 (5 to 7)     | 14.7% (8.6% to 20.4%)                                   |
| Tokelau                             | 0 (0 to 0)             | 0 (0 to 0)             | 7 (6 to 10)                                    | 9 (7 to 12)    | 21.6% (13.2% to 30.4%)                                  |
| Tonga                               | 3 (3 to 4)             | 3 (3 to 4)             | 4 (3 to 5)                                     | 4 (3 to 4)     | -8.6% (-18.7% to 0.1%)                                  |
| Tuvalu                              | 1 (0 to 1)             | 1 (1 to 1)             | 8 (6 to 10)                                    | 9 (7 to 12)    | 18.7% (11.1% to 26.9%)                                  |
| Vanuatu                             | 4 (4 to 6)             | 10 (8 to 12)           | 3 (3 to 4)                                     | 4 (3 to 5)     | 10.2% (6.5% to 14.3%)                                   |
| <b>North Africa and Middle East</b> | 42700 (28665 to 64843) | 52776 (34780 to 97680) | 14 (9 to 21)                                   | 9 (6 to 17)    | -32.7% (-60.7% to 8.9%)                                 |
| <b>North Africa and Middle East</b> | 42700 (28665 to 64843) | 52776 (34780 to 97680) | 14 (9 to 21)                                   | 9 (6 to 17)    | -32.7% (-60.7% to 8.9%)                                 |
| Afghanistan                         | 1241 (577 to 2984)     | 10452 (3261 to 29635)  | 11 (5 to 25)                                   | 44 (12 to 132) | 308.3% (115.4% to 502.2%)                               |
| Algeria                             | 1191 (957 to 1500)     | 1935 (1588 to 2368)    | 5 (4 to 6)                                     | 5 (4 to 6)     | -6.7% (-13.1% to -0.4%)                                 |
| Bahrain                             | 21 (17 to 27)          | 65 (53 to 78)          | 4 (4 to 5)                                     | 5 (4 to 6)     | 5.6% (-2.2% to 13.4%)                                   |
| Egypt                               | 1923 (1536 to 2429)    | 4060 (3281 to 5084)    | 4 (3 to 5)                                     | 4 (3 to 5)     | 16.3% (6.6% to 33.8%)                                   |
| Iran (Islamic Republic of)          | 24800 (13327 to 45554) | 4164 (3373 to 5116)    | 51 (26 to 95)                                  | 5 (4 to 6)     | -90.2% (-94.8% to -81.2%)                               |
| Iraq                                | 1862 (1081 to 3507)    | 3076 (2202 to 4940)    | 11 (6 to 19)                                   | 7 (5 to 11)    | -32.4% (-44.7% to -15.8%)                               |
| Jordan                              | 143 (118 to 173)       | 456 (379 to 543)       | 4 (3 to 5)                                     | 4 (3 to 5)     | -1.1% (-6.7% to 4.5%)                                   |
| Kuwait                              | 702 (234 to 1879)      | 222 (183 to 267)       | 36 (12 to 97)                                  | 5 (4 to 6)     | -86.3% (-94.9% to -60.5%)                               |
| Lebanon                             | 547 (234 to 1362)      | 244 (201 to 294)       | 16 (7 to 40)                                   | 5 (4 to 6)     | -71.5% (-87.7% to -37.5%)                               |

1  
2  
3  
4  
5  
6  
7  
8  
9  
10  
11  
12  
13  
14  
15  
16  
17  
18  
19  
20  
21  
22  
23  
24  
25  
26  
27  
28  
29  
30  
31  
32  
33  
34  
35  
36  
37  
38  
39  
40  
41  
42  
43  
44  
45  
46

|                           | Incidence               |                           |                                                |              |                                                         |
|---------------------------|-------------------------|---------------------------|------------------------------------------------|--------------|---------------------------------------------------------|
|                           | Numbers<br>(95% UI)     |                           | Age-standardized rates per 100,000<br>(95% UI) |              | Percentage change of age-standardized rates<br>(95% UI) |
|                           | (Year 1990)             | (Year 2019)               | (Year 1990)                                    | (Year 2019)  | (Year 1990–Year 2019)                                   |
| Libya                     | 186 (150 to 231)        | 815 (471 to 1647)         | 5 (4 to 6)                                     | 12 (7 to 24) | 141.6% (40.5% to 405.8%)                                |
| Morocco                   | 1146 (938 to 1394)      | 1836 (1507 to 2226)       | 5 (4 to 6)                                     | 5 (4 to 6)   | 8.0% (2.9% to 13.7%)                                    |
| Oman                      | 111 (87 to 142)         | 279 (226 to 355)          | 7 (5 to 9)                                     | 7 (5 to 9)   | -0.5% (-7.3% to 6.9%)                                   |
| Palestine                 | 357 (142 to 926)        | 254 (207 to 324)          | 16 (7 to 41)                                   | 5 (4 to 7)   | -66.9% (-83.5% to -29.6%)                               |
| Qatar                     | 32 (26 to 39)           | 204 (168 to 248)          | 7 (6 to 9)                                     | 7 (6 to 8)   | -3.2% (-10.3% to 3.5%)                                  |
| Saudi Arabia              | 1214 (999 to 1476)      | 4304 (3458 to 5275)       | 9 (7 to 11)                                    | 12 (9 to 14) | 33.3% (26.1% to 40.4%)                                  |
| Sudan                     | 3034 (1646 to 6333)     | 3305 (2618 to 4167)       | 16 (9 to 32)                                   | 9 (7 to 12)  | -43.6% (-72.1% to -7.9%)                                |
| Syrian Arab Republic      | 474 (388 to 577)        | 2762 (1061 to 7102)       | 4 (3 to 5)                                     | 26 (9 to 69) | 548.3% (131.1% to 1510.3%)                              |
| Tunisia                   | 365 (295 to 449)        | 574 (467 to 697)          | 5 (4 to 6)                                     | 5 (4 to 6)   | 6.1% (-0.9% to 13.0%)                                   |
| Turkey                    | 2725 (2128 to 3708)     | 4391 (3619 to 5398)       | 5 (4 to 6)                                     | 5 (4 to 6)   | 11.1% (-9.0% to 28.1%)                                  |
| United Arab Emirates      | 102 (82 to 127)         | 562 (454 to 695)          | 6 (5 to 7)                                     | 6 (5 to 7)   | -3.5% (-8.2% to 1.3%)                                   |
| Yemen                     | 495 (404 to 603)        | 8763 (2941 to 24072)      | 4 (3 to 5)                                     | 26 (9 to 70) | 510.5% (122.1% to 1565%)                                |
| <b>South Asia</b>         | 81527 (64240 to 103563) | 156382 (120425 to 201426) | 9 (7 to 11)                                    | 9 (7 to 12)  | 5.1% (-7.8% to 12.8%)                                   |
| <b>South Asia</b>         | 81527 (64240 to 103563) | 156382 (120425 to 201426) | 9 (7 to 11)                                    | 9 (7 to 12)  | 5.1% (-7.8% to 12.8%)                                   |
| Bangladesh                | 4734 (3645 to 6205)     | 8139 (6241 to 10775)      | 5 (4 to 6)                                     | 5 (4 to 7)   | 4.4% (-3.6% to 11.1%)                                   |
| Bhutan                    | 29 (22 to 39)           | 52 (41 to 68)             | 6 (4 to 7)                                     | 7 (6 to 9)   | 28.4% (20.1% to 38.7%)                                  |
| India                     | 71333 (56267 to 91142)  | 134888 (103757 to 173814) | 10 (8 to 13)                                   | 10 (8 to 13) | 2.1% (-11.3% to 10.4%)                                  |
| Nepal                     | 1039 (854 to 1257)      | 2007 (1633 to 2454)       | 6 (5 to 8)                                     | 7 (6 to 9)   | 11.0% (7.1% to 14.4%)                                   |
| Pakistan                  | 4392 (3396 to 5692)     | 11294 (8483 to 15235)     | 5 (4 to 6)                                     | 6 (4 to 8)   | 21.7% (14.9% to 28.3%)                                  |
| <b>Sub-Saharan Africa</b> | 79036 (42497 to 164850) | 79227 (60108 to 104346)   | 18 (10 to 34)                                  | 9 (7 to 13)  | -46.4% (-70.9% to -17%)                                 |

1  
2  
3  
4  
5  
6  
7  
8  
9  
10  
11  
12  
13  
14  
15  
16  
17  
18  
19  
20  
21  
22  
23  
24  
25  
26  
27  
28  
29  
30  
31  
32  
33  
34  
35  
36  
37  
38  
39  
40  
41  
42  
43  
44  
45  
46

|                                    | Incidence              |                        |                                                |               |                                                         |
|------------------------------------|------------------------|------------------------|------------------------------------------------|---------------|---------------------------------------------------------|
|                                    | Numbers<br>(95% UI)    |                        | Age-standardized rates per 100,000<br>(95% UI) |               | Percentage change of age-standardized rates<br>(95% UI) |
|                                    | (Year 1990)            | (Year 2019)            | (Year 1990)                                    | (Year 2019)   | (Year 1990–Year 2019)                                   |
| <b>Southern Sub-Saharan Africa</b> | 4607 (3525 to 6118)    | 6590 (5072 to 8666)    | 10 (8 to 14)                                   | 9 (7 to 12)   | -12.0% (-16.5% to -8.4%)                                |
| Botswana                           | 93 (73 to 120)         | 201 (155 to 267)       | 9 (7 to 11)                                    | 10 (7 to 13)  | 12.1% (6.3% to 17.3%)                                   |
| Eswatini                           | 50 (40 to 65)          | 90 (69 to 119)         | 8 (6 to 10)                                    | 9 (7 to 12)   | 13.7% (9.7% to 18.0%)                                   |
| Lesotho                            | 123 (97 to 155)        | 184 (142 to 241)       | 8 (6 to 10)                                    | 10 (7 to 13)  | 20.6% (12.5% to 29.1%)                                  |
| Namibia                            | 103 (79 to 135)        | 202 (154 to 267)       | 9 (7 to 12)                                    | 10 (7 to 13)  | 8.1% (4.7% to 11.7%)                                    |
| South Africa                       | 3579 (2694 to 4822)    | 4748 (3614 to 6370)    | 11 (8 to 15)                                   | 9 (7 to 12)   | -18.9% (-23.8% to -15.2%)                               |
| Zimbabwe                           | 659 (524 to 828)       | 1164 (911 to 1469)     | 9 (7 to 11)                                    | 10 (8 to 13)  | 12.7% (2.0% to 32.6%)                                   |
| <b>Western Sub-Saharan Africa</b>  | 16168 (11877 to 22347) | 38162 (28265 to 51944) | 11 (8 to 15)                                   | 11 (8 to 15)  | 3.4% (-5.4% to 8.0%)                                    |
| Benin                              | 367 (272 to 500)       | 1004 (729 to 1385)     | 11 (8 to 15)                                   | 11 (8 to 15)  | 5.8% (2.4% to 9.3%)                                     |
| Burkina Faso                       | 704 (520 to 961)       | 2207 (1612 to 3054)    | 10 (8 to 14)                                   | 13 (10 to 18) | 28.1% (18.4% to 49.1%)                                  |
| Cabo Verde                         | 26 (20 to 34)          | 57 (43 to 76)          | 9 (7 to 11)                                    | 11 (8 to 14)  | 24.9% (20.3% to 29.7%)                                  |
| Cameroon                           | 879 (632 to 1227)      | 2960 (2102 to 4128)    | 12 (8 to 17)                                   | 14 (10 to 19) | 15.9% (9.2% to 27.2%)                                   |
| Chad                               | 620 (398 to 1058)      | 1275 (939 to 1744)     | 13 (8 to 20)                                   | 11 (8 to 15)  | -11.7% (-39.3% to 10.5%)                                |
| Côte d'Ivoire                      | 934 (689 to 1281)      | 2179 (1598 to 2998)    | 11 (8 to 16)                                   | 12 (9 to 16)  | 2.4% (-0.8% to 5.7%)                                    |
| Gambia                             | 65 (49 to 87)          | 170 (127 to 229)       | 9 (7 to 13)                                    | 10 (8 to 14)  | 10.6% (7.3% to 13.7%)                                   |
| Ghana                              | 1226 (880 to 1713)     | 3340 (2335 to 4766)    | 11 (8 to 15)                                   | 13 (9 to 18)  | 19.6% (16.1% to 23.5%)                                  |
| Guinea                             | 475 (354 to 645)       | 1043 (750 to 1460)     | 10 (7 to 13)                                   | 11 (8 to 16)  | 14.7% (10.8% to 18.6%)                                  |
| Guinea-Bissau                      | 92 (65 to 131)         | 178 (124 to 255)       | 12 (9 to 17)                                   | 12 (9 to 17)  | 0.8% (-2.3% to 3.8%)                                    |
| Liberia                            | 1272 (356 to 3721)     | 339 (250 to 461)       | 68 (20 to 187)                                 | 9 (7 to 13)   | -86% (-95.2% to -53.4%)                                 |
| Mali                               | 832 (585 to 1265)      | 1931 (1389 to 2803)    | 12 (9 to 18)                                   | 12 (9 to 17)  | -1.2% (-11.6% to 5.6%)                                  |
| Mauritania                         | 213 (150 to 304)       | 383 (269 to 545)       | 13 (9 to 19)                                   | 12 (8 to 17)  | -8.9% (-15.6% to -3.5%)                                 |
| Niger                              | 626 (467 to 851)       | 1736 (1306 to 2329)    | 11 (8 to 15)                                   | 11 (8 to 15)  | 2.7% (-2.8% to 6.7%)                                    |
| Nigeria                            | 6673 (5070 to 8794)    | 16736 (12504 to 22446) | 10 (7 to 13)                                   | 11 (8 to 14)  | 9.2% (4.9% to 17.8%)                                    |

1  
2  
3  
4  
5  
6  
7  
8  
9  
10  
11  
12  
13  
14  
15  
16  
17  
18  
19  
20  
21  
22  
23  
24  
25  
26  
27  
28  
29  
30  
31  
32  
33  
34  
35  
36  
37  
38  
39  
40  
41  
42  
43  
44  
45  
46

|                                   | Incidence               |                        |                                                |               |                                                         |
|-----------------------------------|-------------------------|------------------------|------------------------------------------------|---------------|---------------------------------------------------------|
|                                   | Numbers<br>(95% UI)     |                        | Age-standardized rates per 100,000<br>(95% UI) |               | Percentage change of age-standardized rates<br>(95% UI) |
|                                   | (Year 1990)             | (Year 2019)            | (Year 1990)                                    | (Year 2019)   | (Year 1990–Year 2019)                                   |
| Sao Tome and Principe             | 10 (8 to 13)            | 21 (16 to 28)          | 11 (8 to 14)                                   | 13 (10 to 18) | 24.0% (19.8% to 28.1%)                                  |
| Senegal                           | 578 (428 to 786)        | 1219 (885 to 1673)     | 10 (8 to 14)                                   | 11 (8 to 15)  | 3.0% (-5.8% to 8.2%)                                    |
| Sierra Leone                      | 280 (207 to 382)        | 667 (479 to 929)       | 10 (7 to 13)                                   | 11 (8 to 15)  | 10.6% (7.3% to 14%)                                     |
| Togo                              | 295 (211 to 412)        | 716 (511 to 1016)      | 11 (8 to 15)                                   | 11 (8 to 16)  | 4.7% (1.4% to 7.6%)                                     |
| <b>Eastern Sub-Saharan Africa</b> | 54804 (22784 to 133741) | 29156 (22453 to 37652) | 30 (14 to 69)                                  | 9 (7 to 12)   | -69.8% (-86.8% to -36.8%)                               |
| Burundi                           | 237 (182 to 307)        | 521 (402 to 674)       | 5 (4 to 7)                                     | 5 (4 to 7)    | -0.9% (-6.9% to 10.2%)                                  |
| Comoros                           | 49 (35 to 68)           | 86 (62 to 122)         | 13 (9 to 18)                                   | 13 (10 to 19) | 2.6% (-1.2% to 6.9%)                                    |
| Djibouti                          | 61 (40 to 98)           | 119 (88 to 161)        | 15 (11 to 24)                                  | 12 (9 to 16)  | -21% (-47.9% to -2.2%)                                  |
| Eritrea                           | 3433 (819 to 10266)     | 635 (467 to 861)       | 112 (30 to 330)                                | 12 (9 to 16)  | -89.2% (-96.5% to -59.7%)                               |
| Ethiopia                          | 38357 (10931 to 107247) | 4139 (3323 to 5096)    | 72 (22 to 190)                                 | 5 (4 to 6)    | -93.3% (-97.5% to -78%)                                 |
| Kenya                             | 858 (681 to 1054)       | 1995 (1580 to 2483)    | 5 (4 to 6)                                     | 5 (4 to 6)    | 0.3% (-1.5% to 2.6%)                                    |
| Madagascar                        | 1106 (812 to 1516)      | 2400 (1784 to 3217)    | 11 (8 to 16)                                   | 11 (8 to 15)  | -2.7% (-7.0% to 2.5%)                                   |
| Malawi                            | 750 (563 to 1004)       | 1498 (1148 to 1968)    | 10 (8 to 14)                                   | 10 (8 to 14)  | 2.3% (-2.3% to 7.1%)                                    |
| Mozambique                        | 1885 (1194 to 3430)     | 3459 (2568 to 4656)    | 17 (11 to 29)                                  | 16 (12 to 22) | -7.9% (-43.1% to 18.4%)                                 |
| Rwanda                            | 1598 (867 to 3273)      | 1281 (933 to 1771)     | 25 (14 to 48)                                  | 12 (9 to 17)  | -50.6% (-74.7% to -23.1%)                               |
| Somalia                           | 1386 (691 to 3196)      | 2192 (1537 to 3307)    | 22 (12 to 47)                                  | 13 (10 to 20) | -39.4% (-61.2% to -10.6%)                               |
| South Sudan                       | 550 (404 to 749)        | 964 (698 to 1429)      | 12 (9 to 17)                                   | 13 (9 to 18)  | 6.4% (-5.1% to 34.7%)                                   |
| Uganda                            | 1664 (1208 to 2433)     | 3506 (2626 to 4657)    | 12 (9 to 17)                                   | 11 (8 to 15)  | -7.6% (-27.4% to 3.4%)                                  |
| United Republic of Tanzania       | 2217 (1681 to 2959)     | 4873 (3700 to 6437)    | 11 (8 to 15)                                   | 11 (8 to 15)  | 0.1% (-3.9% to 4.3%)                                    |
| Zambia                            | 612 (472 to 798)        | 1463 (1123 to 1917)    | 10 (8 to 14)                                   | 11 (8 to 14)  | 3.8% (-2.1% to 9.4%)                                    |
| <b>Central Sub-Saharan Africa</b> | 3457 (2080 to 6799)     | 5318 (3976 to 7773)    | 7 (4 to 12)                                    | 5 (4 to 6)    | -29.1% (-48% to -10.3%)                                 |
| Angola                            | 1919 (702 to 5157)      | 971 (759 to 1233)      | 18 (7 to 46)                                   | 4 (3 to 5)    | -77.1% (-90.9% to -43.8%)                               |

1  
2  
3  
4  
5  
6  
7  
8  
9  
10  
11  
12  
13  
14  
15  
16  
17  
18  
19  
20  
21  
22  
23  
24  
25  
26  
27  
28  
29  
30  
31  
32  
33  
34  
35  
36  
37  
38  
39  
40  
41  
42  
43  
44  
45  
46

|                                  | <b>Incidence</b>            |                     |                                                        |                    |                                                                 |
|----------------------------------|-----------------------------|---------------------|--------------------------------------------------------|--------------------|-----------------------------------------------------------------|
|                                  | <b>Numbers<br/>(95% UI)</b> |                     | <b>Age-standardized rates per 100,000<br/>(95% UI)</b> |                    | <b>Percentage change of age-standardized rates<br/>(95% UI)</b> |
|                                  | <b>(Year 1990)</b>          | <b>(Year 2019)</b>  | <b>(Year 1990)</b>                                     | <b>(Year 2019)</b> | <b>(Year 1990–Year 2019)</b>                                    |
| Central African Republic         | 83 (67 to 104)              | 365 (208 to 741)    | 4 (3 to 5)                                             | 7 (4 to 14)        | 93.1% (24.9% to 269.5%)                                         |
| Congo                            | 79 (62 to 101)              | 167 (131 to 213)    | 4 (3 to 5)                                             | 4 (3 to 5)         | -6.2% (-8.9% to -3.3%)                                          |
| Democratic Republic of the Congo | 1324 (1018 to 1742)         | 3704 (2691 to 5623) | 4 (3 to 5)                                             | 5 (4 to 7)         | 17.8% (3.5% to 51.4%)                                           |
| Equatorial Guinea                | 14 (11 to 17)               | 45 (35 to 57)       | 4 (3 to 5)                                             | 4 (3 to 5)         | 2.8% (-2.9% to 7.9%)                                            |
| Gabon                            | 37 (29 to 48)               | 67 (53 to 86)       | 4 (4 to 6)                                             | 4 (3 to 6)         | -1.3% (-4.5% to 2.9%)                                           |

Abbreviations: UI, uncertainty interval

Table 12. Prevalence of spinal cord injury in 1990 and 2019, and percentage changes of age-standardized estimates by location, 1990–2019

| Location                         | Prevalence                      |                                 |                                                    |                  |                                                             |
|----------------------------------|---------------------------------|---------------------------------|----------------------------------------------------|------------------|-------------------------------------------------------------|
|                                  | Numbers<br>(95% UI)             |                                 | Age-standardized estimates per 100,000<br>(95% UI) |                  | Percentage change of age-standardized<br>estimates (95% UI) |
|                                  | (Year 1990)                     | (Year 2019)                     | (Year 1990)                                        | (Year 2019)      | (Year 1990–Year 2019)                                       |
| <b>Global</b>                    | 11366799 (10375237 to 13112529) | 20635037 (18925876 to 23611174) | 239 (220 to 272)                                   | 253 (231 to 290) | 5.8% (2.7% to 9.6%)                                         |
| <b>High-income</b>               | 3309339 (3097968 to 3559963)    | 4658703 (4322688 to 5025979)    | 319 (298 to 343)                                   | 314 (293 to 339) | -1.6% (-3.2% to -0.1%)                                      |
| <b>High-income North America</b> | 1470807 (1362896 to 1596414)    | 2142480 (1965695 to 2332658)    | 468 (434 to 510)                                   | 438 (404 to 474) | -6.5% (-9.1% to -3.8%)                                      |
| Canada                           | 61362 (57616 to 66045)          | 104864 (98334 to 112454)        | 200 (188 to 215)                                   | 203 (191 to 218) | 1.5% (-1.3% to 4.2%)                                        |
| Greenland                        | 279 (257 to 306)                | 313 (288 to 341)                | 536 (495 to 584)                                   | 477 (437 to 518) | -11.1% (-13.9% to -8.8%)                                    |
| United States of America         | 1409133 (1303741 to 1532097)    | 2037268 (1865361 to 2222271)    | 497 (460 to 542)                                   | 465 (428 to 505) | -6.5% (-9.2% to -3.7%)                                      |
| <b>Australasia</b>               | 73943 (68140 to 82386)          | 128689 (118942 to 142726)       | 339 (312 to 378)                                   | 362 (331 to 405) | 6.8% (4.0% to 9.8%)                                         |
| Australia                        | 60172 (55261 to 67234)          | 106452 (98260 to 118061)        | 331 (304 to 370)                                   | 354 (323 to 397) | 7.0% (3.9% to 10.5%)                                        |
| New Zealand                      | 13771 (12703 to 15056)          | 22238 (20608 to 24554)          | 380 (350 to 416)                                   | 407 (374 to 452) | 7.0% (3.2% to 11.4%)                                        |
| <b>High-income Asia Pacific</b>  | 623896 (583531 to 673069)       | 859398 (798884 to 927726)       | 317 (297 to 342)                                   | 305 (283 to 328) | -3.9% (-5.7% to -1.8%)                                      |
| Brunei Darussalam                | 396 (371 to 425)                | 809 (759 to 862)                | 184 (173 to 196)                                   | 177 (167 to 188) | -4.0% (-7.1% to -0.9%)                                      |
| Japan                            | 526634 (490533 to 569215)       | 675897 (622213 to 733296)       | 347 (324 to 375)                                   | 342 (316 to 371) | -1.4% (-3.5% to 0.9%)                                       |

1  
2  
3  
4  
5  
6  
7  
8  
9  
10  
11  
12  
13  
14  
15  
16  
17  
18  
19  
20  
21  
22  
23  
24  
25  
26  
27  
28  
29  
30  
31  
32  
33  
34  
35  
36  
37  
38  
39  
40  
41  
42  
43  
44  
45  
46

| Location              | Prevalence                  |                              |                                                    |                  |                                                             |
|-----------------------|-----------------------------|------------------------------|----------------------------------------------------|------------------|-------------------------------------------------------------|
|                       | Numbers<br>(95% UI)         |                              | Age-standardized estimates per 100,000<br>(95% UI) |                  | Percentage change of age-standardized<br>estimates (95% UI) |
|                       | (Year 1990)                 | (Year 2019)                  | (Year 1990)                                        | (Year 2019)      | (Year 1990–Year 2019)                                       |
| Republic of Korea     | 90930 (85259 to 96631)      | 168438 (158707 to 180809)    | 213 (200 to 225)                                   | 229 (216 to 247) | 7.9% (4.3% to 11.9%)                                        |
| Singapore             | 5936 (5540 to 6352)         | 14255 (13304 to 15272)       | 188 (176 to 201)                                   | 195 (182 to 209) | 3.6% (0.7% to 6.5%)                                         |
| <b>Western Europe</b> | 1047289 (982594 to 1125303) | 1374656 (1272365 to 1486731) | 229 (215 to 246)                                   | 233 (216 to 253) | 1.4% (-1.4% to 4.3%)                                        |
| Andorra               | 138 (129 to 149)            | 284 (265 to 307)             | 231 (216 to 249)                                   | 247 (230 to 268) | 6.9% (3.1% to 11.5%)                                        |
| Austria               | 22253 (20832 to 23942)      | 28169 (26147 to 30656)       | 240 (224 to 258)                                   | 232 (215 to 255) | -3.0% (-7.6% to 1.1%)                                       |
| Belgium               | 28809 (26945 to 31200)      | 41680 (38494 to 45149)       | 241 (225 to 263)                                   | 269 (248 to 294) | 11.5% (6.8% to 16.8%)                                       |
| Cyprus                | 1599 (1492 to 1730)         | 3506 (3240 to 3836)          | 196 (183 to 212)                                   | 217 (200 to 239) | 10.5% (5.0% to 16.9%)                                       |
| Denmark               | 13546 (12628 to 14620)      | 15769 (14579 to 17119)       | 214 (199 to 232)                                   | 213 (194 to 234) | -0.7% (-5.4% to 4.5%)                                       |
| Finland               | 18048 (16781 to 19591)      | 23401 (21471 to 25629)       | 305 (283 to 333)                                   | 313 (285 to 349) | 2.6% (-1.3% to 8.2%)                                        |
| France                | 164549 (154347 to 175895)   | 222331 (205901 to 240071)    | 244 (229 to 262)                                   | 248 (229 to 268) | 1.4% (-2.5% to 5.3%)                                        |
| Germany               | 200326 (187433 to 215127)   | 252232 (231248 to 274013)    | 205 (191 to 220)                                   | 214 (196 to 234) | 4.4% (-0.2% to 9.4%)                                        |
| Greece                | 26017 (24358 to 28055)      | 27838 (25879 to 30192)       | 214 (200 to 232)                                   | 203 (188 to 222) | -5% (-9.2% to -1.5%)                                        |
| Iceland               | 563 (527 to 606)            | 924 (853 to 1003)            | 213 (199 to 229)                                   | 221 (203 to 242) | 3.9% (-0.3% to 8.4%)                                        |

1  
2  
3  
4  
5  
6  
7  
8  
9  
10  
11  
12  
13  
14  
15  
16  
17  
18  
19  
20  
21  
22  
23  
24  
25  
26  
27  
28  
29  
30  
31  
32  
33  
34  
35  
36  
37  
38  
39  
40  
41  
42  
43  
44  
45  
46

| Location       | Prevalence                |                           |                                                    |                  |                                                             |
|----------------|---------------------------|---------------------------|----------------------------------------------------|------------------|-------------------------------------------------------------|
|                | Numbers<br>(95% UI)       |                           | Age-standardized estimates per 100,000<br>(95% UI) |                  | Percentage change of age-standardized<br>estimates (95% UI) |
|                | (Year 1990)               | (Year 2019)               | (Year 1990)                                        | (Year 2019)      | (Year 1990–Year 2019)                                       |
| Ireland        | 7297 (6822 to 7883)       | 12722 (11716 to 13820)    | 199 (186 to 216)                                   | 218 (200 to 239) | 9.5% (5.1% to 13.8%)                                        |
| Israel         | 9064 (8381 to 9847)       | 23677 (19717 to 31856)    | 191 (176 to 207)                                   | 247 (204 to 337) | 29.8% (11.9% to 69.2%)                                      |
| Italy          | 152759 (143157 to 165237) | 167203 (155913 to 180891) | 218 (204 to 235)                                   | 193 (179 to 208) | -11.8% (-14.3% to -8.9%)                                    |
| Luxembourg     | 1098 (1035 to 1181)       | 1867 (1742 to 2028)       | 240 (226 to 259)                                   | 236 (219 to 256) | -1.9% (-6.2% to 2.3%)                                       |
| Malta          | 839 (776 to 919)          | 1394 (1284 to 1511)       | 208 (192 to 228)                                   | 240 (218 to 263) | 15.3% (10.9% to 20.5%)                                      |
| Monaco         | 180 (164 to 197)          | 257 (234 to 283)          | 428 (390 to 477)                                   | 488 (440 to 553) | 14.0% (9.9% to 19.1%)                                       |
| Netherlands    | 30052 (28101 to 32175)    | 45505 (42399 to 48825)    | 175 (163 to 188)                                   | 193 (180 to 208) | 10.5% (6.1% to 14.5%)                                       |
| Norway         | 25378 (23017 to 27724)    | 36099 (32427 to 39596)    | 486 (444 to 531)                                   | 503 (454 to 557) | 3.5% (0.5% to 7.0%)                                         |
| Portugal       | 23506 (21407 to 27259)    | 23534 (21821 to 26017)    | 207 (188 to 245)                                   | 156 (144 to 172) | -24.8% (-30.4% to -20.7%)                                   |
| San Marino     | 123 (113 to 135)          | 218 (198 to 241)          | 454 (416 to 501)                                   | 505 (457 to 568) | 11.3% (7.1% to 15.8%)                                       |
| Spain          | 86830 (81809 to 92631)    | 129596 (120047 to 140357) | 197 (185 to 210)                                   | 208 (192 to 228) | 5.7% (-0.3% to 11.6%)                                       |
| Sweden         | 53249 (48329 to 58425)    | 72301 (65044 to 79382)    | 489 (447 to 539)                                   | 515 (464 to 573) | 5.3% (2.1% to 8.9%)                                         |
| Switzerland    | 25301 (23630 to 27371)    | 32541 (29900 to 35495)    | 300 (280 to 323)                                   | 272 (248 to 300) | -9.3% (-13.3% to -4.0%)                                     |
| United Kingdom | 154893 (144548 to 166794) | 210409 (194954 to 228369) | 231 (216 to 250)                                   | 243 (225 to 265) | 5.1% (2.2% to 8.0%)                                         |



| Location                                                | Prevalence                    |                              |                                                    |                  |                                                             |
|---------------------------------------------------------|-------------------------------|------------------------------|----------------------------------------------------|------------------|-------------------------------------------------------------|
|                                                         | Numbers<br>(95% UI)           |                              | Age-standardized estimates per 100,000<br>(95% UI) |                  | Percentage change of age-standardized<br>estimates (95% UI) |
|                                                         | (Year 1990)                   | (Year 2019)                  | (Year 1990)                                        | (Year 2019)      | (Year 1990–Year 2019)                                       |
|                                                         | <b>Southern Latin America</b> | 93403 (86234 to 104555)      | 153480 (143685 to 165038)                          | 194 (179 to 216) | 209 (195 to 225)                                            |
| Argentina                                               | 63830 (57864 to 74714)        | 99369 (92357 to 107852)      | 197 (179 to 230)                                   | 205 (190 to 223) | 3.8% (-5.3% to 9.4%)                                        |
| Chile                                                   | 22612 (21262 to 24053)        | 45271 (42649 to 48478)       | 182 (172 to 193)                                   | 215 (202 to 231) | 18.2% (14.5% to 22.3%)                                      |
| Uruguay                                                 | 6957 (6534 to 7440)           | 8832 (8331 to 9435)          | 212 (198 to 227)                                   | 223 (210 to 239) | 5.5% (1.9% to 9.1%)                                         |
| <b>Central Europe, Eastern Europe, and Central Asia</b> | 1454386 (1361320 to 1563953)  | 1470355 (1367128 to 1601720) | 325 (304 to 349)                                   | 291 (270 to 317) | -10.5% (-13.3% to -5.1%)                                    |
| <b>Eastern Europe</b>                                   | 899009 (838179 to 972430)     | 805575 (746346 to 876551)    | 354 (330 to 382)                                   | 305 (282 to 333) | -13.9% (-16.5% to -9.0%)                                    |
| Belarus                                                 | 35844 (33576 to 38509)        | 35199 (33016 to 38065)       | 309 (289 to 332)                                   | 290 (272 to 313) | -6.1% (-8.7% to -3.2%)                                      |
| Estonia                                                 | 6363 (5922 to 6860)           | 4627 (4341 to 4987)          | 358 (333 to 385)                                   | 273 (255 to 293) | -23.9% (-27.0% to -20.9%)                                   |
| Latvia                                                  | 11684 (10953 to 12620)        | 6847 (6438 to 7434)          | 382 (358 to 412)                                   | 273 (256 to 295) | -28.6% (-31.3% to -25.9%)                                   |
| Lithuania                                               | 14772 (13822 to 15932)        | 11184 (10535 to 12051)       | 362 (338 to 390)                                   | 297 (279 to 321) | -17.8% (-20.3% to -14.8%)                                   |
| Republic of Moldova                                     | 12807 (12015 to 13711)        | 11018 (10315 to 11881)       | 279 (262 to 299)                                   | 239 (223 to 257) | -14.5% (-17.6% to -11.2%)                                   |
| Russian Federation                                      | 608061 (566008 to 658182)     | 575291 (532592 to 628058)    | 361 (336 to 390)                                   | 313 (289 to 343) | -13.4% (-16.5% to -8.1%)                                    |
| Ukraine                                                 | 209478 (194928 to 226542)     | 161409 (149366 to 177092)    | 346 (322 to 374)                                   | 292 (269 to 321) | -15.6% (-18.7% to -10.7%)                                   |

1  
2  
3  
4  
5  
6  
7  
8  
9  
10  
11  
12  
13  
14  
15  
16  
17  
18  
19  
20  
21  
22  
23  
24  
25  
26  
27  
28  
29  
30  
31  
32  
33  
34  
35  
36  
37  
38  
39  
40  
41  
42  
43  
44  
45  
46

| Location               | Prevalence                |                           |                                                    |                  |                                                             |
|------------------------|---------------------------|---------------------------|----------------------------------------------------|------------------|-------------------------------------------------------------|
|                        | Numbers<br>(95% UI)       |                           | Age-standardized estimates per 100,000<br>(95% UI) |                  | Percentage change of age-standardized<br>estimates (95% UI) |
|                        | (Year 1990)               | (Year 2019)               | (Year 1990)                                        | (Year 2019)      | (Year 1990–Year 2019)                                       |
| <b>Central Europe</b>  | 439972 (412747 to 471841) | 489513 (456513 to 533815) | 326 (306 to 350)                                   | 332 (308 to 363) | 1.8% (-1.4% to 6.8%)                                        |
| Albania                | 8866 (8151 to 9594)       | 10877 (9969 to 12120)     | 306 (282 to 330)                                   | 332 (303 to 375) | 8.7% (2.5% to 20.1%)                                        |
| Bosnia and Herzegovina | 14423 (12916 to 17202)    | 20410 (14633 to 35167)    | 302 (271 to 363)                                   | 491 (349 to 860) | 62.4% (25.7% to 136.1%)                                     |
| Bulgaria               | 32719 (30682 to 35010)    | 26946 (25037 to 29240)    | 325 (304 to 348)                                   | 308 (284 to 334) | -5.3% (-8.7% to -2.7%)                                      |
| Croatia                | 19846 (18467 to 21281)    | 21217 (19643 to 23395)    | 350 (325 to 375)                                   | 369 (339 to 408) | 5.6% (0.1% to 14.4%)                                        |
| Czechia                | 42455 (39887 to 45742)    | 51155 (47808 to 55398)    | 362 (340 to 390)                                   | 366 (340 to 397) | 1.0% (-2.5% to 5.0%)                                        |
| Hungary                | 40571 (38006 to 43552)    | 40177 (37422 to 43691)    | 332 (310 to 357)                                   | 316 (293 to 343) | -5.0% (-8.6% to -0.2%)                                      |
| Montenegro             | 2028 (1896 to 2178)       | 2449 (2288 to 2656)       | 313 (292 to 336)                                   | 324 (302 to 352) | 3.5% (0.4% to 6.9%)                                         |
| North Macedonia        | 5347 (4945 to 5725)       | 7655 (7103 to 8316)       | 257 (238 to 275)                                   | 289 (267 to 314) | 12.2% (8.3% to 16.7%)                                       |
| Poland                 | 132249 (123697 to 142241) | 163770 (153262 to 177622) | 322 (301 to 346)                                   | 327 (305 to 354) | 1.5% (-1.1% to 4.0%)                                        |
| Romania                | 83378 (78152 to 89666)    | 72662 (67894 to 78563)    | 327 (306 to 352)                                   | 297 (276 to 323) | -9.3% (-12.4% to -6.2%)                                     |
| Serbia                 | 30163 (28050 to 32472)    | 36205 (31742 to 45108)    | 287 (265 to 308)                                   | 341 (296 to 435) | 19.0% (5.7% to 49.8%)                                       |
| Slovakia               | 18681 (17476 to 20094)    | 24557 (22989 to 26578)    | 333 (311 to 359)                                   | 349 (326 to 379) | 4.9% (1.9% to 8.4%)                                         |

| Location                           | Prevalence                 |                              |                                                    |                  |                                                             |
|------------------------------------|----------------------------|------------------------------|----------------------------------------------------|------------------|-------------------------------------------------------------|
|                                    | Numbers<br>(95% UI)        |                              | Age-standardized estimates per 100,000<br>(95% UI) |                  | Percentage change of age-standardized<br>estimates (95% UI) |
|                                    | (Year 1990)                | (Year 2019)                  | (Year 1990)                                        | (Year 2019)      | (Year 1990–Year 2019)                                       |
|                                    | Slovenia                   | 9245 (8607 to 9977)          | 11433 (10655 to 12393)                             | 413 (384 to 445) | 401 (373 to 435)                                            |
| <b>Central Asia</b>                | 115405 (107057 to 125666)  | 175268 (159927 to 201702)    | 191 (178 to 208)                                   | 186 (170 to 212) | -2.7% (-9.8% to 10.6%)                                      |
| Armenia                            | 15954 (10905 to 25069)     | 9408 (7488 to 12854)         | 483 (332 to 766)                                   | 264 (212 to 358) | -45.3% (-53.4% to -34.9%)                                   |
| Azerbaijan                         | 10359 (9704 to 11027)      | 19475 (17317 to 23953)       | 156 (147 to 166)                                   | 169 (151 to 205) | 8.1% (-1.5% to 30.6%)                                       |
| Georgia                            | 11614 (10921 to 12425)     | 10030 (9083 to 11840)        | 199 (187 to 212)                                   | 236 (211 to 282) | 18.5% (8.9% to 40.7%)                                       |
| Kazakhstan                         | 31263 (29228 to 33341)     | 39097 (36469 to 42064)       | 201 (188 to 215)                                   | 203 (190 to 218) | 1.0% (-1.4% to 3.2%)                                        |
| Kyrgyzstan                         | 6759 (6335 to 7180)        | 10187 (9455 to 11006)        | 179 (168 to 190)                                   | 165 (154 to 178) | -7.7% (-11% to -2.5%)                                       |
| Mongolia                           | 2544 (2390 to 2715)        | 6391 (5970 to 6861)          | 151 (142 to 161)                                   | 184 (172 to 198) | 22.3% (18.4% to 26.1%)                                      |
| Tajikistan                         | 6617 (6202 to 7080)        | 20651 (13792 to 38620)       | 165 (155 to 176)                                   | 237 (160 to 436) | 43.8% (-1.4% to 165.1%)                                     |
| Turkmenistan                       | 4278 (4001 to 4543)        | 7701 (7145 to 8470)          | 144 (135 to 153)                                   | 152 (141 to 167) | 5.7% (0.9% to 13.5%)                                        |
| Uzbekistan                         | 26017 (24383 to 27765)     | 52328 (48703 to 55999)       | 157 (148 to 167)                                   | 158 (147 to 168) | 0.5% (-2.7% to 3.7%)                                        |
| <b>Latin America and Caribbean</b> | 945885 (843370 to 1108550) | 1654334 (1525342 to 1823896) | 288 (260 to 329)                                   | 271 (250 to 299) | -5.8% (-11.6% to -1.4%)                                     |
| <b>Central Latin America</b>       | 422080 (355172 to 564287)  | 656424 (594640 to 761640)    | 311 (271 to 394)                                   | 259 (235 to 300) | -16.8% (-24.4% to -12%)                                     |

1  
2  
3  
4  
5  
6  
7  
8  
9  
10  
11  
12  
13  
14  
15  
16  
17  
18  
19  
20  
21  
22  
23  
24  
25  
26  
27  
28  
29  
30  
31  
32  
33  
34  
35  
36  
37  
38  
39  
40  
41  
42  
43  
44  
45  
46

| Location                           | Prevalence                |                           |                                                    |                  |                                                             |
|------------------------------------|---------------------------|---------------------------|----------------------------------------------------|------------------|-------------------------------------------------------------|
|                                    | Numbers<br>(95% UI)       |                           | Age-standardized estimates per 100,000<br>(95% UI) |                  | Percentage change of age-standardized<br>estimates (95% UI) |
|                                    | (Year 1990)               | (Year 2019)               | (Year 1990)                                        | (Year 2019)      | (Year 1990–Year 2019)                                       |
| Colombia                           | 62172 (54456 to 74082)    | 100259 (86297 to 132383)  | 220 (196 to 254)                                   | 196 (169 to 259) | -10.5% (-18.7% to 3.4%)                                     |
| Costa Rica                         | 3776 (3499 to 4080)       | 8130 (7657 to 8739)       | 149 (139 to 160)                                   | 160 (151 to 172) | 7.5% (4.5% to 10.5%)                                        |
| El Salvador                        | 34391 (12461 to 90889)    | 20241 (11797 to 42493)    | 671 (263 to 1743)                                  | 337 (193 to 718) | -49.8% (-59.1% to -26%)                                     |
| Guatemala                          | 21796 (10355 to 49254)    | 29872 (22956 to 46810)    | 308 (158 to 673)                                   | 198 (149 to 318) | -35.6% (-53.6% to -4.6%)                                    |
| Honduras                           | 4381 (4085 to 4715)       | 14252 (12544 to 16931)    | 125 (118 to 133)                                   | 165 (146 to 198) | 32.3% (18.9% to 56.1%)                                      |
| Mexico                             | 241316 (222816 to 264653) | 404685 (374488 to 442322) | 365 (338 to 399)                                   | 319 (295 to 348) | -12.7% (-14.5% to -11.1%)                                   |
| Nicaragua                          | 25022 (7657 to 67214)     | 19884 (9920 to 43869)     | 667 (232 to 1742)                                  | 342 (167 to 760) | -48.7% (-56.3% to -26.6%)                                   |
| Panama                             | 3415 (2840 to 5443)       | 6453 (5833 to 7965)       | 161 (137 to 240)                                   | 154 (139 to 190) | -4.3% (-21.7% to 4.6%)                                      |
| Venezuela (Bolivarian Republic of) | 25812 (23940 to 27785)    | 52649 (47953 to 58203)    | 163 (152 to 174)                                   | 177 (161 to 196) | 9.1% (2.4% to 19.3%)                                        |
| <b>Andean Latin America</b>        | 45203 (35649 to 68463)    | 84038 (74358 to 105119)   | 137 (113 to 195)                                   | 136 (120 to 169) | -1.2% (-13.2% to 7.9%)                                      |
| Bolivia (Plurinational State of)   | 4761 (4505 to 5045)       | 11226 (10592 to 11990)    | 93 (89 to 98)                                      | 103 (97 to 109)  | 10.4% (6.8% to 14.2%)                                       |
| Ecuador                            | 10497 (9440 to 12158)     | 23004 (21613 to 24784)    | 129 (117 to 147)                                   | 136 (127 to 146) | 5.4% (-1.9% to 11.3%)                                       |
| Peru                               | 29944 (20967 to 51939)    | 49807 (41420 to 70628)    | 154 (114 to 249)                                   | 146 (121 to 205) | -5.4% (-19.7% to 7.5%)                                      |

1

2

3

4

5

6

7

8

9

10

11

12

13

14

15

16

17

18

19

20

21

22

23

24

25

26

27

28

29

30

31

32

33

34

35

36

37

38

39

40

41

42

43

44

45

46

47

48

49

50

51

52

| Location                         | Prevalence             |                          |                                                    |                  |                                                             |
|----------------------------------|------------------------|--------------------------|----------------------------------------------------|------------------|-------------------------------------------------------------|
|                                  | Numbers<br>(95% UI)    |                          | Age-standardized estimates per 100,000<br>(95% UI) |                  | Percentage change of age-standardized<br>estimates (95% UI) |
|                                  | (Year 1990)            | (Year 2019)              | (Year 1990)                                        | (Year 2019)      | (Year 1990–Year 2019)                                       |
| <b>Caribbean</b>                 | 45566 (43184 to 48167) | 118136 (93316 to 165454) | 145 (138 to 153)                                   | 239 (188 to 336) | 64.8% (29.1% to 131.2%)                                     |
| Antigua and Barbuda              | 64 (60 to 68)          | 133 (124 to 142)         | 113 (106 to 120)                                   | 131 (123 to 140) | 16.2% (13.2% to 19.6%)                                      |
| Bahamas                          | 251 (236 to 266)       | 513 (487 to 543)         | 107 (102 to 113)                                   | 123 (117 to 130) | 14.8% (10.7% to 18.7%)                                      |
| Barbados                         | 272 (255 to 289)       | 426 (403 to 451)         | 105 (98 to 111)                                    | 117 (111 to 124) | 12.0% (8.4% to 15.3%)                                       |
| Belize                           | 166 (153 to 184)       | 525 (488 to 578)         | 118 (110 to 129)                                   | 138 (128 to 152) | 16.5% (12.4% to 21.5%)                                      |
| Bermuda                          | 165 (154 to 177)       | 259 (242 to 278)         | 248 (232 to 266)                                   | 297 (277 to 319) | 19.7% (15.2% to 24.9%)                                      |
| Cuba                             | 16409 (15431 to 17403) | 23861 (22638 to 25300)   | 150 (141 to 158)                                   | 162 (153 to 171) | 8.3% (3.6% to 12.4%)                                        |
| Dominica                         | 71 (65 to 82)          | 101 (91 to 117)          | 107 (98 to 122)                                    | 131 (119 to 150) | 22.5% (9.8% to 39.5%)                                       |
| Dominican Republic               | 6180 (5782 to 6599)    | 14734 (13824 to 15659)   | 107 (101 to 114)                                   | 138 (130 to 146) | 28.4% (24.5% to 32.9%)                                      |
| Grenada                          | 102 (77 to 169)        | 149 (137 to 171)         | 136 (104 to 218)                                   | 133 (122 to 153) | -2.1% (-29.9% to 20.1%)                                     |
| Guyana                           | 710 (663 to 781)       | 973 (916 to 1048)        | 107 (101 to 117)                                   | 127 (120 to 137) | 18.5% (14.7% to 21.7%)                                      |
| Haiti                            | 4542 (4299 to 4839)    | 49888 (26327 to 93675)   | 88 (83 to 93)                                      | 431 (230 to 813) | 391% (164.9% to 805.4%)                                     |
| Jamaica                          | 2379 (2231 to 2558)    | 3502 (3305 to 3721)      | 116 (109 to 124)                                   | 117 (111 to 125) | 1.1% (-1.7% to 3.9%)                                        |
| Puerto Rico                      | 10610 (9955 to 11350)  | 15476 (14251 to 17427)   | 293 (275 to 313)                                   | 330 (303 to 374) | 12.6% (5.7% to 25.2%)                                       |
| Saint Kitts and Nevis            | 77 (72 to 82)          | 174 (163 to 186)         | 213 (200 to 226)                                   | 257 (241 to 276) | 21.1% (17.0% to 25.0%)                                      |
| Saint Lucia                      | 121 (113 to 131)       | 255 (240 to 270)         | 107 (100 to 115)                                   | 126 (119 to 134) | 17.7% (13.2% to 21.8%)                                      |
| Saint Vincent and the Grenadines | 93 (87 to 99)          | 147 (139 to 156)         | 102 (96 to 109)                                    | 117 (111 to 125) | 14.9% (10.4% to 19.9%)                                      |
| Suriname                         | 445 (366 to 702)       | 759 (696 to 904)         | 126 (106 to 190)                                   | 125 (115 to 147) | -1.0% (-23.1% to 10.7%)                                     |
| Trinidad and Tobago              | 1133 (1056 to 1227)    | 1950 (1844 to 2084)      | 103 (96 to 111)                                    | 121 (114 to 129) | 17.3% (13.6% to 20.4%)                                      |

| Location                                      | Prevalence                   |                              |                                                    |                  |                                                             |
|-----------------------------------------------|------------------------------|------------------------------|----------------------------------------------------|------------------|-------------------------------------------------------------|
|                                               | Numbers<br>(95% UI)          |                              | Age-standardized estimates per 100,000<br>(95% UI) |                  | Percentage change of age-standardized<br>estimates (95% UI) |
|                                               | (Year 1990)                  | (Year 2019)                  | (Year 1990)                                        | (Year 2019)      | (Year 1990–Year 2019)                                       |
| United States Virgin Islands                  | 260 (244 to 276)             | 310 (294 to 330)             | 250 (235 to 266)                                   | 241 (229 to 256) | -3.4% (-6.9% to 0.2%)                                       |
| <b>Tropical Latin America</b>                 | 433036 (398417 to 474467)    | 795736 (733802 to 868808)    | 333 (308 to 363)                                   | 325 (299 to 355) | -2.5% (-5.4% to 0.3%)                                       |
| Brazil                                        | 428811 (394414 to 470171)    | 786832 (725507 to 859364)    | 338 (312 to 369)                                   | 330 (304 to 360) | -2.4% (-5.3% to 0.5%)                                       |
| Paraguay                                      | 4224 (3901 to 4636)          | 8904 (8300 to 9587)          | 133 (124 to 144)                                   | 133 (125 to 143) | 0.2% (-3.4% to 3.3%)                                        |
| <b>Southeast Asia, East Asia, and Oceania</b> | 2869879 (2659889 to 3149019) | 6408788 (5994232 to 6934620) | 189 (176 to 207)                                   | 245 (229 to 265) | 29.5% (24.5% to 33.7%)                                      |
| <b>East Asia</b>                              | 2174815 (2017401 to 2348060) | 5147994 (4799710 to 5551476) | 193 (180 to 208)                                   | 266 (249 to 287) | 38.0% (34.1% to 42.4%)                                      |
| China                                         | 2139839 (1983005 to 2312296) | 5096258 (4750056 to 5499035) | 197 (183 to 213)                                   | 273 (255 to 294) | 38.7% (34.7% to 43.2%)                                      |
| Democratic People's Republic of Korea         | 14339 (13493 to 15314)       | 21809 (20610 to 23210)       | 72 (68 to 77)                                      | 70 (66 to 74)    | -3.5% (-7.1% to 0.8%)                                       |
| Taiwan (Province of China)                    | 20637 (19362 to 21924)       | 29927 (28119 to 32019)       | 106 (100 to 113)                                   | 91 (86 to 97)    | -14.3% (-18.4% to -10.0%)                                   |
| <b>Southeast Asia</b>                         | 690953 (602962 to 898824)    | 1249313 (1128418 to 1450442) | 176 (158 to 220)                                   | 179 (162 to 206) | 1.3% (-10.7% to 9.4%)                                       |
| Cambodia                                      | 29805 (8827 to 99033)        | 27229 (17353 to 57818)       | 311 (107 to 991)                                   | 179 (114 to 386) | -42.4% (-62.6% to 8.8%)                                     |
| Indonesia                                     | 371199 (342075 to 415584)    | 624426 (577523 to 681498)    | 244 (226 to 269)                                   | 236 (218 to 257) | -3.4% (-9.0% to 1.7%)                                       |
| Laos People's Democratic Republic             | 2735 (2537 to 2982)          | 6076 (5689 to 6527)          | 85 (79 to 91)                                      | 95 (89 to 101)   | 11.3% (8.3% to 14.3%)                                       |

| Location         | Prevalence              |                           |                                                    |                  |                                                             |
|------------------|-------------------------|---------------------------|----------------------------------------------------|------------------|-------------------------------------------------------------|
|                  | Numbers<br>(95% UI)     |                           | Age-standardized estimates per 100,000<br>(95% UI) |                  | Percentage change of age-standardized<br>estimates (95% UI) |
|                  | (Year 1990)             | (Year 2019)               | (Year 1990)                                        | (Year 2019)      | (Year 1990–Year 2019)                                       |
|                  | Malaysia                | 15417 (14482 to 16507)    | 38532 (36236 to 41114)                             | 107 (101 to 114) | 122 (114 to 130)                                            |
| Maldives         | 124 (117 to 131)        | 566 (518 to 639)          | 81 (77 to 86)                                      | 113 (104 to 126) | 39.2% (30.0% to 55.1%)                                      |
| Mauritius        | 1930 (1813 to 2073)     | 3734 (3493 to 4032)       | 188 (177 to 201)                                   | 240 (224 to 258) | 27.7% (22.6% to 33.7%)                                      |
| Myanmar          | 45843 (31351 to 98916)  | 95561 (72067 to 134781)   | 124 (90 to 251)                                    | 174 (132 to 244) | 40.0% (-11.8% to 104.1%)                                    |
| Philippines      | 70220 (53653 to 111258) | 127472 (109169 to 165496) | 137 (110 to 204)                                   | 125 (107 to 162) | -8.8% (-24% to 1.4%)                                        |
| Seychelles       | 126 (118 to 135)        | 267 (250 to 287)          | 197 (184 to 210)                                   | 230 (215 to 246) | 16.5% (12.4% to 20.4%)                                      |
| Sri Lanka        | 28614 (20202 to 48485)  | 72326 (44291 to 142831)   | 176 (130 to 285)                                   | 304 (184 to 605) | 72.2% (36.7% to 119%)                                       |
| Thailand         | 67897 (63611 to 72766)  | 112221 (105208 to 121967) | 131 (123 to 140)                                   | 125 (117 to 137) | -4.6% (-8.2% to 0.0%)                                       |
| Timor-Leste      | 2771 (998 to 7454)      | 3636 (1543 to 9215)       | 372 (146 to 974)                                   | 355 (150 to 902) | -4.7% (-10.6% to 3.9%)                                      |
| Viet Nam         | 53354 (50294 to 56627)  | 135628 (127816 to 144368) | 100 (95 to 106)                                    | 129 (122 to 138) | 29.0% (25.6% to 32.8%)                                      |
| <b>Oceania</b>   | 4111 (3871 to 4403)     | 11481 (10493 to 12939)    | 82 (78 to 88)                                      | 104 (95 to 117)  | 26.0% (19.6% to 36.0%)                                      |
| American Samoa   | 72 (67 to 77)           | 119 (108 to 134)          | 193 (181 to 207)                                   | 224 (204 to 252) | 16.1% (8.1% to 29.6%)                                       |
| Cook Islands     | 37 (34 to 40)           | 52 (48 to 57)             | 227 (210 to 246)                                   | 252 (232 to 276) | 11.4% (6.8% to 16.4%)                                       |
| Fiji             | 484 (448 to 524)        | 773 (714 to 844)          | 75 (70 to 80)                                      | 85 (78 to 93)    | 13.4% (9.8% to 17.5%)                                       |
| Guam             | 256 (238 to 277)        | 403 (375 to 441)          | 214 (200 to 231)                                   | 224 (209 to 245) | 4.9% (0.6% to 9.1%)                                         |
| Kiribati         | 32 (30 to 35)           | 65 (59 to 72)             | 52 (48 to 56)                                      | 60 (56 to 66)    | 16.4% (10.6% to 25.9%)                                      |
| Marshall Islands | 24 (22 to 25)           | 43 (40 to 46)             | 76 (72 to 82)                                      | 82 (76 to 88)    | 7.1% (4.6% to 9.6%)                                         |

1  
2  
3  
4  
5  
6  
7  
8  
9  
10  
11  
12  
13  
14  
15  
16  
17  
18  
19  
20  
21  
22  
23  
24  
25  
26  
27  
28  
29  
30  
31  
32  
33  
34  
35  
36  
37  
38  
39  
40  
41  
42  
43  
44  
45  
46

| Location                            | Prevalence                 |                             |                                                    |                   |                                                             |
|-------------------------------------|----------------------------|-----------------------------|----------------------------------------------------|-------------------|-------------------------------------------------------------|
|                                     | Numbers<br>(95% UI)        |                             | Age-standardized estimates per 100,000<br>(95% UI) |                   | Percentage change of age-standardized<br>estimates (95% UI) |
|                                     | (Year 1990)                | (Year 2019)                 | (Year 1990)                                        | (Year 2019)       | (Year 1990–Year 2019)                                       |
| Micronesia (Federated States of)    | 57 (53 to 62)              | 86 (78 to 95)               | 75 (70 to 81)                                      | 90 (82 to 99)     | 19.5% (14.1% to 28.3%)                                      |
| Nauru                               | 13 (12 to 14)              | 16 (15 to 18)               | 162 (152 to 173)                                   | 185 (172 to 201)  | 14.8% (10.7% to 19.3%)                                      |
| Niue                                | 4 (3 to 4)                 | 4 (4 to 4)                  | 173 (161 to 185)                                   | 216 (200 to 237)  | 24.8% (19.3% to 32.7%)                                      |
| Northern Mariana Islands            | 95 (88 to 104)             | 128 (119 to 140)            | 239 (223 to 258)                                   | 251 (232 to 273)  | 5.1% (0.7% to 9.5%)                                         |
| Palau                               | 32 (30 to 34)              | 60 (55 to 65)               | 233 (217 to 252)                                   | 272 (252 to 298)  | 17.1% (13.5% to 20.7%)                                      |
| Papua New Guinea                    | 2311 (2175 to 2472)        | 8120 (7373 to 9247)         | 74 (70 to 79)                                      | 101 (92 to 114)   | 35.9% (27.3% to 49.4%)                                      |
| Samoa                               | 104 (97 to 112)            | 239 (201 to 303)            | 84 (79 to 90)                                      | 128 (109 to 162)  | 52.3% (31.5% to 89.9%)                                      |
| Solomon Islands                     | 202 (181 to 234)           | 501 (460 to 558)            | 83 (75 to 94)                                      | 95 (87 to 105)    | 14.4% (8.0% to 19.4%)                                       |
| Tokelau                             | 2 (2 to 2)                 | 2 (2 to 3)                  | 150 (140 to 160)                                   | 187 (174 to 202)  | 24.7% (20.5% to 29.7%)                                      |
| Tonga                               | 58 (54 to 62)              | 75 (70 to 81)               | 78 (73 to 84)                                      | 83 (78 to 90)     | 6.6% (2.3% to 11.6%)                                        |
| Tuvalu                              | 12 (11 to 12)              | 20 (18 to 21)               | 140 (132 to 149)                                   | 173 (161 to 187)  | 23.8% (19.7% to 29.0%)                                      |
| Vanuatu                             | 91 (80 to 110)             | 232 (201 to 282)            | 78 (69 to 93)                                      | 94 (81 to 113)    | 19.5% (12.7% to 28.5%)                                      |
| <b>North Africa and Middle East</b> | 761978 (412124 to 1681726) | 1597740 (989333 to 3176105) | 252 (145 to 518)                                   | 264 (166 to 520)  | 5.0% (-19.4% to 21.4%)                                      |
| <b>North Africa and Middle East</b> | 761978 (412124 to 1681726) | 1597740 (989333 to 3176105) | 252 (145 to 518)                                   | 264 (166 to 520)  | 5.0% (-19.4% to 21.4%)                                      |
| Afghanistan                         | 170410 (21376 to 675039)   | 229275 (64978 to 655574)    | 1558 (216 to 6103)                                 | 810 (225 to 2351) | -48.0% (-65.9% to 41.6%)                                    |
| Algeria                             | 25519 (23487 to 27768)     | 67773 (56104 to 95193)      | 133 (124 to 145)                                   | 160 (134 to 221)  | 20.1% (2.5% to 61.7%)                                       |
| Bahrain                             | 549 (503 to 619)           | 2464 (2288 to 2677)         | 118 (109 to 133)                                   | 137 (128 to 149)  | 16.2% (8.9% to 22.2%)                                       |
| Egypt                               | 40374 (38033 to 43009)     | 91724 (85282 to 100309)     | 88 (83 to 93)                                      | 100 (93 to 108)   | 13.8% (8.4% to 21.8%)                                       |



| Location             | Prevalence                 |                           |                                                    |                    |                                                             |
|----------------------|----------------------------|---------------------------|----------------------------------------------------|--------------------|-------------------------------------------------------------|
|                      | Numbers<br>(95% UI)        |                           | Age-standardized estimates per 100,000<br>(95% UI) |                    | Percentage change of age-standardized<br>estimates (95% UI) |
|                      | (Year 1990)                | (Year 2019)               | (Year 1990)                                        | (Year 2019)        | (Year 1990–Year 2019)                                       |
|                      | Iran (Islamic Republic of) | 153375 (88594 to 316280)  | 192392 (147592 to 289632)                          | 333 (200 to 673)   | 209 (163 to 308)                                            |
| Iraq                 | 141309 (44811 to 400279)   | 275649 (100535 to 735044) | 905 (308 to 2513)                                  | 694 (261 to 1839)  | -23.3% (-32.7% to -11.6%)                                   |
| Jordan               | 2840 (2672 to 3012)        | 12356 (11428 to 13714)    | 106 (100 to 112)                                   | 118 (110 to 129)   | 10.9% (5.8% to 19.5%)                                       |
| Kuwait               | 2499 (2200 to 3098)        | 8925 (7309 to 12662)      | 159 (143 to 190)                                   | 179 (150 to 246)   | 12.6% (3.7% to 28.4%)                                       |
| Lebanon              | 24895 (6752 to 81123)      | 21407 (8783 to 61368)     | 804 (228 to 2582)                                  | 400 (164 to 1148)  | -50.2% (-57.6% to -27.9%)                                   |
| Libya                | 5625 (4142 to 9380)        | 20977 (12852 to 41589)    | 168 (134 to 249)                                   | 287 (177 to 573)   | 71.0% (31.2% to 126.2%)                                     |
| Morocco              | 27077 (24049 to 33304)     | 49136 (45658 to 53596)    | 128 (116 to 152)                                   | 133 (124 to 145)   | 4.1% (-6.6% to 10.5%)                                       |
| Oman                 | 2197 (2040 to 2360)        | 7431 (6863 to 8020)       | 147 (137 to 157)                                   | 160 (150 to 171)   | 9.3% (5.5% to 13.7%)                                        |
| Palestine            | 13014 (4565 to 34264)      | 34617 (12023 to 92970)    | 701 (271 to 1799)                                  | 814 (289 to 2164)  | 16.1% (1.3% to 24.0%)                                       |
| Qatar                | 757 (704 to 818)           | 5438 (5015 to 5874)       | 172 (162 to 185)                                   | 172 (160 to 184)   | -0.5% (-4.4% to 3.4%)                                       |
| Saudi Arabia         | 23679 (22193 to 25441)     | 99232 (90735 to 108803)   | 202 (189 to 216)                                   | 256 (237 to 279)   | 27.2% (21.8% to 32.6%)                                      |
| Sudan                | 32065 (26718 to 44313)     | 88763 (69261 to 135844)   | 208 (179 to 272)                                   | 274 (218 to 405)   | 31.5% (19.6% to 50.5%)                                      |
| Syrian Arab Republic | 16275 (9261 to 39605)      | 146780 (46392 to 407902)  | 157 (99 to 352)                                    | 1049 (333 to 2942) | 567.8% (215.4% to 1184.7%)                                  |

1  
2

| Location             | Prevalence                   |                              |                                                    |                  |                                                             |
|----------------------|------------------------------|------------------------------|----------------------------------------------------|------------------|-------------------------------------------------------------|
|                      | Numbers<br>(95% UI)          |                              | Age-standardized estimates per 100,000<br>(95% UI) |                  | Percentage change of age-standardized<br>estimates (95% UI) |
|                      | (Year 1990)                  | (Year 2019)                  | (Year 1990)                                        | (Year 2019)      | (Year 1990–Year 2019)                                       |
| Tunisia              | 8279 (7740 to 9006)          | 16698 (15691 to 17935)       | 120 (112 to 130)                                   | 130 (122 to 140) | 8.6% (3.7% to 13.4%)                                        |
| Turkey               | 52416 (49089 to 56145)       | 139191 (121472 to 172113)    | 102 (96 to 109)                                    | 151 (132 to 188) | 47.9% (32.9% to 75.7%)                                      |
| United Arab Emirates | 2490 (2314 to 2700)          | 17277 (16071 to 18581)       | 140 (132 to 151)                                   | 139 (131 to 148) | -1.2% (-5.1% to 1.8%)                                       |
| Yemen                | 15821 (10321 to 29852)       | 68611 (34516 to 160572)      | 149 (108 to 252)                                   | 260 (137 to 595) | 74.1% (25.0% to 134.1%)                                     |
| South Asia           | 1313358 (1235439 to 1395741) | 3161582 (2952968 to 3412943) | 153 (145 to 162)                                   | 188 (176 to 202) | 22.9% (19.5% to 27.1%)                                      |
| South Asia           | 1313358 (1235439 to 1395741) | 3161582 (2952968 to 3412943) | 153 (145 to 162)                                   | 188 (176 to 202) | 22.9% (19.5% to 27.1%)                                      |
| Bangladesh           | 84744 (77080 to 94106)       | 229245 (204809 to 265803)    | 105 (97 to 115)                                    | 148 (132 to 171) | 41.0% (33.7% to 50.7%)                                      |
| Bhutan               | 509 (475 to 545)             | 1192 (1113 to 1276)          | 115 (108 to 123)                                   | 166 (156 to 177) | 43.6% (37.9% to 50.9%)                                      |
| India                | 1134037 (1065345 to 1209041) | 2620689 (2458704 to 2800787) | 166 (157 to 177)                                   | 197 (185 to 211) | 18.6% (15.6% to 21.5%)                                      |
| Nepal                | 17788 (16718 to 19069)       | 50961 (44198 to 63223)       | 121 (115 to 129)                                   | 183 (160 to 222) | 50.6% (35.5% to 80.4%)                                      |
| Pakistan             | 76281 (71641 to 80906)       | 259494 (229416 to 318122)    | 95 (89 to 101)                                     | 144 (129 to 172) | 51.5% (37.9% to 77.7%)                                      |
| Sub-Saharan Africa   | 711974 (573802 to 1072304)   | 1683535 (1394868 to 2363973) | 193 (164 to 265)                                   | 211 (177 to 288) | 9.1% (4.8% to 13.0%)                                        |

39  
40  
41  
42  
43  
44  
45  
46

| Location                           | Prevalence                |                           |                                                    |                  |                                                             |
|------------------------------------|---------------------------|---------------------------|----------------------------------------------------|------------------|-------------------------------------------------------------|
|                                    | Numbers<br>(95% UI)       |                           | Age-standardized estimates per 100,000<br>(95% UI) |                  | Percentage change of age-standardized<br>estimates (95% UI) |
|                                    | (Year 1990)               | (Year 2019)               | (Year 1990)                                        | (Year 2019)      | (Year 1990–Year 2019)                                       |
| <b>Southern Sub-Saharan Africa</b> | 88483 (81203 to 100702)   | 125520 (117191 to 135338) | 214 (198 to 239)                                   | 171 (160 to 184) | -20.3% (-25.3% to -17.5%)                                   |
| Botswana                           | 1540 (1432 to 1663)       | 3919 (3628 to 4221)       | 157 (147 to 169)                                   | 178 (166 to 191) | 13.3% (10.5% to 16.5%)                                      |
| Eswatini                           | 853 (795 to 913)          | 1458 (1350 to 1563)       | 154 (145 to 165)                                   | 150 (140 to 160) | -3.1% (-5.3% to -0.7%)                                      |
| Lesotho                            | 2067 (1925 to 2219)       | 2692 (2508 to 2885)       | 146 (136 to 156)                                   | 139 (130 to 149) | -4.7% (-7.5% to -1.2%)                                      |
| Namibia                            | 3028 (2000 to 5729)       | 4126 (3720 to 4849)       | 260 (184 to 449)                                   | 201 (182 to 237) | -22.6% (-48.4% to 1.6%)                                     |
| South Africa                       | 70255 (64677 to 80330)    | 96685 (90104 to 104482)   | 232 (214 to 261)                                   | 176 (165 to 190) | -24.1% (-29.5% to -21.1%)                                   |
| Zimbabwe                           | 10739 (9999 to 11655)     | 16640 (15505 to 17907)    | 151 (142 to 163)                                   | 140 (132 to 151) | -7.3% (-9.5% to -5.0%)                                      |
| <b>Western Sub-Saharan Africa</b>  | 246022 (228652 to 265737) | 686804 (626081 to 784464) | 183 (171 to 197)                                   | 215 (198 to 241) | 17.7% (14.0% to 26.0%)                                      |
| Benin                              | 5790 (5410 to 6173)       | 17311 (16106 to 18602)    | 187 (175 to 199)                                   | 207 (193 to 222) | 11.1% (8.9% to 13.4%)                                       |
| Burkina Faso                       | 10229 (9563 to 10973)     | 32023 (29801 to 34408)    | 161 (151 to 173)                                   | 212 (198 to 228) | 32.0% (29.5% to 34.7%)                                      |
| Cabo Verde                         | 482 (452 to 515)          | 1197 (1120 to 1284)       | 187 (176 to 200)                                   | 229 (215 to 245) | 22.3% (19.4% to 25.5%)                                      |
| Cameroon                           | 15328 (14138 to 16623)    | 48942 (44632 to 54262)    | 219 (202 to 236)                                   | 234 (214 to 256) | 6.8% (2.4% to 12.4%)                                        |
| Chad                               | 10278 (7050 to 18421)     | 22401 (19089 to 30056)    | 231 (170 to 381)                                   | 225 (193 to 296) | -2.6% (-23.6% to 14.9%)                                     |
| Côte d'Ivoire                      | 14611 (13535 to 15712)    | 39548 (36200 to 43009)    | 183 (171 to 196)                                   | 206 (191 to 222) | 12.7% (9.8% to 17.8%)                                       |
| Gambia                             | 1241 (1073 to 1596)       | 3008 (2775 to 3265)       | 187 (166 to 230)                                   | 189 (175 to 206) | 1.4% (-12.1% to 8.9%)                                       |

1  
2  
3  
4  
5  
6  
7  
8  
9  
10  
11  
12  
13  
14  
15  
16  
17  
18  
19  
20  
21  
22  
23  
24  
25  
26  
27  
28  
29  
30  
31  
32  
33  
34  
35  
36  
37  
38  
39  
40  
41  
42  
43  
44  
45  
46

| Location                          | Prevalence                |                            |                                                    |                   |                                                             |
|-----------------------------------|---------------------------|----------------------------|----------------------------------------------------|-------------------|-------------------------------------------------------------|
|                                   | Numbers<br>(95% UI)       |                            | Age-standardized estimates per 100,000<br>(95% UI) |                   | Percentage change of age-standardized<br>estimates (95% UI) |
|                                   | (Year 1990)               | (Year 2019)                | (Year 1990)                                        | (Year 2019)       | (Year 1990–Year 2019)                                       |
| Ghana                             | 21026 (19340 to 22809)    | 62838 (57513 to 68360)     | 201 (186 to 217)                                   | 248 (228 to 270)  | 23.3% (20.7% to 25.8%)                                      |
| Guinea                            | 7872 (7352 to 8437)       | 17737 (16424 to 19192)     | 177 (166 to 190)                                   | 205 (190 to 221)  | 15.8% (12.5% to 20.8%)                                      |
| Guinea-Bissau                     | 1353 (1241 to 1470)       | 3078 (2793 to 3426)        | 194 (178 to 210)                                   | 222 (202 to 246)  | 14.5% (9.4% to 24.1%)                                       |
| Liberia                           | 2948 (2450 to 4176)       | 10240 (6993 to 18359)      | 195 (167 to 258)                                   | 276 (195 to 483)  | 41.5% (14.8% to 87.6%)                                      |
| Mali                              | 10345 (9609 to 11118)     | 33763 (27877 to 47737)     | 172 (161 to 185)                                   | 235 (198 to 321)  | 36.6% (18.2% to 81.7%)                                      |
| Mauritania                        | 3502 (3209 to 3805)       | 7623 (7004 to 8283)        | 241 (221 to 262)                                   | 257 (236 to 279)  | 6.5% (4.7% to 8.1%)                                         |
| Niger                             | 8807 (8185 to 9456)       | 26780 (24637 to 29399)     | 174 (163 to 186)                                   | 196 (182 to 212)  | 12.7% (9.9% to 16.3%)                                       |
| Nigeria                           | 113598 (105957 to 122265) | 307508 (280722 to 351514)  | 175 (165 to 189)                                   | 205 (189 to 228)  | 16.8% (12% to 27.8%)                                        |
| Sao Tome and Principe             | 178 (165 to 192)          | 415 (386 to 446)           | 209 (196 to 224)                                   | 257 (241 to 276)  | 22.9% (19.3% to 26.1%)                                      |
| Senegal                           | 8905 (8247 to 9569)       | 22726 (20984 to 24629)     | 177 (164 to 190)                                   | 205 (190 to 223)  | 16.3% (13.4% to 20.4%)                                      |
| Sierra Leone                      | 4598 (4290 to 4915)       | 16180 (12691 to 24462)     | 171 (160 to 183)                                   | 265 (211 to 392)  | 54.6% (24.7% to 126.6%)                                     |
| Togo                              | 4922 (4539 to 5336)       | 13475 (12407 to 14597)     | 208 (193 to 224)                                   | 220 (204 to 238)  | 6.1% (3.8% to 8.9%)                                         |
| <b>Eastern Sub-Saharan Africa</b> | 322647 (219213 to 603862) | 712913 (537596 to 1156257) | 216 (159 to 366)                                   | 234 (179 to 377)  | 8.3% (-3.2% to 15.3%)                                       |
| Burundi                           | 3190 (2954 to 3414)       | 67502 (22199 to 188953)    | 78 (73 to 83)                                      | 703 (242 to 1936) | 799.8% (206.9% to 2316.4%)                                  |

| Location                    | Prevalence              |                          |                                                    |                   |                                                             |
|-----------------------------|-------------------------|--------------------------|----------------------------------------------------|-------------------|-------------------------------------------------------------|
|                             | Numbers<br>(95% UI)     |                          | Age-standardized estimates per 100,000<br>(95% UI) |                   | Percentage change of age-standardized<br>estimates (95% UI) |
|                             | (Year 1990)             | (Year 2019)              | (Year 1990)                                        | (Year 2019)       | (Year 1990–Year 2019)                                       |
|                             | Comoros                 | 838 (775 to 905)         | 1849 (1703 to 2001)                                | 252 (234 to 271)  | 291 (269 to 315)                                            |
| Djibouti                    | 754 (692 to 822)        | 2603 (2361 to 2969)      | 230 (214 to 249)                                   | 254 (233 to 287)  | 10.3% (5.6% to 20%)                                         |
| Eritrea                     | 27056 (7937 to 76851)   | 23173 (13141 to 51188)   | 967 (318 to 2678)                                  | 449 (255 to 978)  | -53.5% (-64.8% to -19.5%)                                   |
| Ethiopia                    | 75914 (41139 to 165521) | 140703 (87440 to 285059) | 171 (105 to 344)                                   | 182 (114 to 366)  | 6.0% (-7.0% to 29.3%)                                       |
| Kenya                       | 13839 (12959 to 14779)  | 40838 (36708 to 49228)   | 89 (84 to 94)                                      | 100 (92 to 116)   | 13.0% (5.7% to 30.0%)                                       |
| Madagascar                  | 18232 (16806 to 19829)  | 44949 (41190 to 49020)   | 214 (198 to 232)                                   | 221 (204 to 240)  | 3.3% (0.4% to 6.1%)                                         |
| Malawi                      | 11285 (10462 to 12176)  | 25880 (23743 to 28080)   | 164 (154 to 177)                                   | 193 (179 to 208)  | 17.1% (13.5% to 20.6%)                                      |
| Mozambique                  | 49506 (25560 to 115606) | 54653 (47593 to 69114)   | 456 (259 to 995)                                   | 275 (237 to 357)  | -39.7% (-64.2% to -6.4%)                                    |
| Rwanda                      | 12008 (10930 to 13304)  | 62514 (31791 to 142164)  | 235 (215 to 256)                                   | 605 (316 to 1347) | 157.9% (37.2% to 467.9%)                                    |
| Somalia                     | 11992 (8174 to 33180)   | 38706 (28493 to 65501)   | 218 (161 to 518)                                   | 259 (199 to 421)  | 19.0% (-34.3% to 71.2%)                                     |
| South Sudan                 | 12203 (9589 to 18634)   | 23709 (16946 to 41158)   | 279 (231 to 394)                                   | 344 (255 to 567)  | 23.3% (8.9% to 45.7%)                                       |
| Uganda                      | 42654 (22535 to 100043) | 69689 (60102 to 90469)   | 305 (177 to 675)                                   | 254 (219 to 333)  | -16.5% (-49.7% to 25.6%)                                    |
| United Republic of Tanzania | 34334 (31696 to 36935)  | 90556 (83657 to 98054)   | 189 (176 to 203)                                   | 220 (206 to 237)  | 16.7% (14.1% to 19.2%)                                      |

1  
2  
3  
4  
5  
6  
7  
8  
9  
10  
11  
12  
13  
14  
15  
16  
17  
18  
19  
20  
21  
22  
23  
24  
25  
26  
27  
28  
29  
30  
31  
32  
33  
34  
35  
36  
37  
38  
39  
40  
41  
42  
43  
44  
45  
46

| Location                          | Prevalence              |                          |                                                    |                  |                                                             |
|-----------------------------------|-------------------------|--------------------------|----------------------------------------------------|------------------|-------------------------------------------------------------|
|                                   | Numbers<br>(95% UI)     |                          | Age-standardized estimates per 100,000<br>(95% UI) |                  | Percentage change of age-standardized<br>estimates (95% UI) |
|                                   | (Year 1990)             | (Year 2019)              | (Year 1990)                                        | (Year 2019)      | (Year 1990–Year 2019)                                       |
|                                   | Zambia                  | 8607 (7922 to 9298)      | 25020 (22961 to 27064)                             | 158 (148 to 170) | 188 (175 to 203)                                            |
| <b>Central Sub-Saharan Africa</b> | 54823 (33715 to 110269) | 158299 (92933 to 330433) | 118 (79 to 217)                                    | 154 (93 to 313)  | 30.4% (16.9% to 44.5%)                                      |
| Angola                            | 32214 (11520 to 87247)  | 45818 (23083 to 106888)  | 330 (131 to 869)                                   | 217 (109 to 508) | -34.2% (-42.1% to -15.1%)                                   |
| Central African Republic          | 1161 (1082 to 1243)     | 9062 (4135 to 21755)     | 55 (52 to 58)                                      | 178 (89 to 409)  | 224.5% (63.6% to 624%)                                      |
| Congo                             | 1171 (1094 to 1254)     | 8752 (4373 to 19792)     | 63 (60 to 68)                                      | 184 (96 to 407)  | 191.1% (55.0% to 531%)                                      |
| Democratic Republic of the Congo  | 19452 (18069 to 20914)  | 92511 (58980 to 179752)  | 69 (65 to 74)                                      | 132 (88 to 245)  | 90.4% (29.4% to 249.7%)                                     |
| Equatorial Guinea                 | 195 (182 to 209)        | 830 (772 to 898)         | 61 (58 to 65)                                      | 77 (73 to 82)    | 26.2% (22.1% to 30.4%)                                      |
| Gabon                             | 631 (593 to 673)        | 1326 (1248 to 1413)      | 81 (77 to 86)                                      | 86 (82 to 92)    | 6.5% (4.2% to 8.9%)                                         |

Abbreviations: UI, uncertainty interval

1  
2  
3  
4  
5  
6  
7  
8  
9  
10  
11  
12  
13  
14  
15  
16  
17  
18  
19  
20  
21  
22  
23  
24  
25  
26  
27  
28  
29  
30  
31  
32  
33  
34  
35  
36  
37  
38  
39  
40  
41  
42  
43  
44  
45  
46

Table 13. Years lived with disability for 1990 and 2019 and percentage changes of age-standardized rates by location for spinal cord injury, 1990–2019

| Location                  | YLD                          |                              |                                                |                 |                                                         |
|---------------------------|------------------------------|------------------------------|------------------------------------------------|-----------------|---------------------------------------------------------|
|                           | Numbers<br>(95% UI)          |                              | Age-standardized rates per 100,000<br>(95% UI) |                 | Percentage change of age-standardized rates<br>(95% UI) |
|                           | (Year 1990)                  | (Year 2019)                  | (Year 1990)                                    | (Year 2019)     | (Year 1990–Year 2019)                                   |
| Global                    | 3748672 (2702778 to 4951850) | 6200809 (4465317 to 8156193) | 77 (56 to 101)                                 | 76 (55 to 100)  | -1.5% (-5.6% to 3.3%)                                   |
| High-income               | 885050 (632972 to 1135187)   | 1210171 (857173 to 1553079)  | 86 (62 to 111)                                 | 84 (59 to 108)  | -2.8% (-4.7% to -1.1%)                                  |
| High-income North America | 383372 (273104 to 493551)    | 543327 (382768 to 696793)    | 123 (87 to 159)                                | 113 (80 to 146) | -7.7% (-10.4% to -4.8%)                                 |
| Canada                    | 16435 (11771 to 21451)       | 27394 (19406 to 35536)       | 54 (39 to 70)                                  | 54 (38 to 70)   | 0.8% (-7.1% to 9.1%)                                    |
| Greenland                 | 89 (65 to 114)               | 91 (64 to 116)               | 169 (121 to 213)                               | 139 (98 to 176) | -17.6% (-22% to -12.8%)                                 |
| United States of America  | 366838 (261078 to 473846)    | 515833 (364639 to 661820)    | 130 (93 to 169)                                | 120 (85 to 155) | -7.8% (-10.6% to -4.8%)                                 |
| Australasia               | 19732 (13765 to 25937)       | 33799 (23765 to 44013)       | 91 (63 to 120)                                 | 97 (68 to 127)  | 6.7% (0.8% to 13%)                                      |
| Australia                 | 16039 (11183 to 21253)       | 27954 (19462 to 36495)       | 88 (61 to 117)                                 | 95 (66 to 124)  | 7% (-0.2% to 14.6%)                                     |
| New Zealand               | 3693 (2583 to 4832)          | 5845 (4127 to 7620)          | 102 (71 to 134)                                | 109 (77 to 143) | 6.5% (0% to 13.5%)                                      |
| High-income Asia Pacific  | 171547 (120968 to 220202)    | 226816 (161070 to 292262)    | 87 (62 to 112)                                 | 83 (58 to 107)  | -5.3% (-7.9% to -2.6%)                                  |
| Brunei Darussalam         | 127 (90 to 165)              | 234 (164 to 302)             | 58 (42 to 74)                                  | 50 (35 to 65)   | -12.6% (-19.7% to -5.1%)                                |
| Japan                     | 141594 (100178 to 182978)    | 177770 (125301 to 229752)    | 94 (66 to 122)                                 | 93 (66 to 121)  | -0.8% (-3.5% to 1.9%)                                   |
| Republic of Korea         | 28128 (19849 to 36057)       | 44931 (31441 to 58697)       | 65 (46 to 83)                                  | 62 (43 to 81)   | -4.5% (-12.2% to 4.1%)                                  |

1  
2

| Location       | YLD                       |                           |                                                |                 |                                                         |
|----------------|---------------------------|---------------------------|------------------------------------------------|-----------------|---------------------------------------------------------|
|                | Numbers<br>(95% UI)       |                           | Age-standardized rates per 100,000<br>(95% UI) |                 | Percentage change of age-standardized rates<br>(95% UI) |
|                | (Year 1990)               | (Year 2019)               | (Year 1990)                                    | (Year 2019)     | (Year 1990–Year 2019)                                   |
| Singapore      | 1697 (1193 to 2200)       | 3881 (2727 to 5081)       | 53 (37 to 69)                                  | 53 (37 to 70)   | 0.4% (-8.2% to 9.1%)                                    |
| Western Europe | 279889 (197802 to 361524) | 362292 (259168 to 466837) | 62 (44 to 81)                                  | 63 (45 to 82)   | 1.4% (-2.3% to 5.2%)                                    |
| Andorra        | 38 (27 to 50)             | 76 (54 to 99)             | 63 (45 to 83)                                  | 67 (48 to 88)   | 6.5% (-2.1% to 15.3%)                                   |
| Austria        | 5901 (4157 to 7675)       | 7418 (5264 to 9570)       | 64 (45 to 85)                                  | 63 (44 to 81)   | -2.6% (-10.4% to 6.2%)                                  |
| Belgium        | 7661 (5439 to 9989)       | 10894 (7676 to 14182)     | 65 (46 to 85)                                  | 72 (51 to 95)   | 10.9% (1.9% to 20.4%)                                   |
| Cyprus         | 461 (331 to 602)          | 943 (661 to 1242)         | 57 (41 to 74)                                  | 59 (41 to 78)   | 3.9% (-4.9% to 13.6%)                                   |
| Denmark        | 3584 (2531 to 4695)       | 4168 (2926 to 5448)       | 58 (41 to 75)                                  | 58 (40 to 75)   | 0% (-9.2% to 10.4%)                                     |
| Finland        | 4795 (3379 to 6195)       | 6140 (4337 to 8023)       | 82 (57 to 106)                                 | 85 (59 to 112)  | 3.1% (-5% to 12.3%)                                     |
| France         | 44198 (31606 to 57539)    | 58574 (41243 to 76394)    | 66 (47 to 86)                                  | 67 (47 to 88)   | 0.9% (-7% to 9.7%)                                      |
| Germany        | 53226 (38070 to 70139)    | 65939 (46825 to 86203)    | 55 (39 to 73)                                  | 58 (40 to 76)   | 4.3% (-4.6% to 13.4%)                                   |
| Greece         | 7006 (4919 to 9093)       | 7380 (5230 to 9569)       | 58 (41 to 76)                                  | 55 (39 to 73)   | -5% (-13.1% to 3.3%)                                    |
| Iceland        | 152 (107 to 200)          | 247 (175 to 324)          | 58 (41 to 76)                                  | 60 (42 to 80)   | 4% (-4.8% to 13.7%)                                     |
| Ireland        | 1985 (1414 to 2614)       | 3395 (2405 to 4422)       | 54 (39 to 72)                                  | 59 (42 to 77)   | 8.3% (-0.6% to 17.8%)                                   |
| Israel         | 2599 (1868 to 3382)       | 6892 (4598 to 10405)      | 55 (39 to 71)                                  | 73 (48 to 111)  | 33.1% (8.1% to 83.4%)                                   |
| Italy          | 40412 (28984 to 52258)    | 44023 (31605 to 56655)    | 59 (42 to 76)                                  | 52 (37 to 68)   | -10.7% (-13.9% to -6.8%)                                |
| Luxembourg     | 295 (209 to 385)          | 495 (353 to 644)          | 65 (46 to 85)                                  | 64 (45 to 83)   | -2.4% (-10.8% to 5.8%)                                  |
| Malta          | 232 (164 to 306)          | 370 (261 to 483)          | 58 (41 to 76)                                  | 65 (46 to 86)   | 12.7% (3.7% to 23.3%)                                   |
| Monaco         | 47 (33 to 62)             | 67 (47 to 88)             | 116 (81 to 153)                                | 132 (91 to 177) | 13.9% (6.8% to 21.4%)                                   |

39  
40  
41  
42  
43  
44  
45  
46



1  
2  
3  
4  
5  
6  
7  
8  
9  
10  
11  
12  
13  
14  
15  
16  
17  
18  
19  
20  
21  
22  
23  
24  
25  
26  
27  
28  
29  
30  
31  
32  
33  
34  
35  
36  
37  
38  
39  
40  
41  
42  
43  
44  
45  
46

| Location                                                | YLD                       |                           |                                                |                 |                                                         |
|---------------------------------------------------------|---------------------------|---------------------------|------------------------------------------------|-----------------|---------------------------------------------------------|
|                                                         | Numbers<br>(95% UI)       |                           | Age-standardized rates per 100,000<br>(95% UI) |                 | Percentage change of age-standardized rates<br>(95% UI) |
|                                                         | (Year 1990)               | (Year 2019)               | (Year 1990)                                    | (Year 2019)     | (Year 1990–Year 2019)                                   |
| Netherlands                                             | 8074 (5744 to 10507)      | 11974 (8526 to 15625)     | 47 (33 to 61)                                  | 52 (37 to 68)   | 10.1% (0.5% to 19.8%)                                   |
| Norway                                                  | 6642 (4671 to 8561)       | 9426 (6643 to 12304)      | 129 (91 to 169)                                | 134 (94 to 177) | 3.8% (0.3% to 7.8%)                                     |
| Portugal                                                | 6969 (4907 to 9277)       | 6283 (4459 to 8202)       | 62 (44 to 84)                                  | 43 (30 to 56)   | -31.5% (-39.4% to -24.1%)                               |
| San Marino                                              | 33 (23 to 44)             | 58 (40 to 76)             | 123 (87 to 163)                                | 137 (95 to 181) | 10.7% (3.9% to 18%)                                     |
| Spain                                                   | 23321 (16596 to 30399)    | 34473 (24458 to 44862)    | 53 (38 to 70)                                  | 57 (40 to 75)   | 6.1% (-4.5% to 17.5%)                                   |
| Sweden                                                  | 14031 (9879 to 18292)     | 18973 (13417 to 24808)    | 131 (92 to 172)                                | 139 (96 to 184) | 5.6% (-0.2% to 11.3%)                                   |
| Switzerland                                             | 6683 (4699 to 8775)       | 8610 (6048 to 11261)      | 80 (57 to 105)                                 | 74 (51 to 97)   | -8.2% (-15.9% to -0.1%)                                 |
| United Kingdom                                          | 41311 (29390 to 53200)    | 55158 (39439 to 71101)    | 63 (45 to 81)                                  | 65 (46 to 85)   | 4% (0.7% to 7.2%)                                       |
| <b>Southern Latin America</b>                           | 30510 (22019 to 39520)    | 43936 (31118 to 56649)    | 63 (46 to 82)                                  | 60 (42 to 78)   | -4.8% (-14.1% to 2.9%)                                  |
| Argentina                                               | 21112 (15060 to 28261)    | 29214 (20449 to 37642)    | 65 (47 to 87)                                  | 60 (42 to 78)   | -7.3% (-19.2% to 3.5%)                                  |
| Chile                                                   | 7238 (5210 to 9296)       | 12222 (8740 to 15961)     | 58 (42 to 74)                                  | 59 (42 to 76)   | 1.4% (-7.4% to 10.5%)                                   |
| Uruguay                                                 | 2159 (1561 to 2790)       | 2499 (1787 to 3231)       | 66 (48 to 85)                                  | 64 (46 to 83)   | -3.2% (-11.3% to 6.3%)                                  |
| <b>Central Europe, Eastern Europe, and Central Asia</b> | 444671 (316403 to 564756) | 407384 (290705 to 526194) | 100 (71 to 127)                                | 82 (58 to 106)  | -18% (-21.9% to -10.7%)                                 |
| <b>Eastern Europe</b>                                   | 271646 (192682 to 347314) | 219534 (156030 to 282875) | 108 (76 to 138)                                | 85 (60 to 109)  | -21.4% (-25.1% to -15.4%)                               |

1  
2  
3  
4  
5  
6  
7  
8  
9  
10  
11  
12  
13  
14  
15  
16  
17  
18  
19  
20  
21  
22  
23  
24  
25  
26  
27  
28  
29  
30  
31  
32  
33  
34  
35  
36  
37  
38  
39  
40  
41  
42  
43  
44  
45  
46

| Location               | YLD                       |                           |                                                |                 |                                                         |
|------------------------|---------------------------|---------------------------|------------------------------------------------|-----------------|---------------------------------------------------------|
|                        | Numbers<br>(95% UI)       |                           | Age-standardized rates per 100,000<br>(95% UI) |                 | Percentage change of age-standardized rates<br>(95% UI) |
|                        | (Year 1990)               | (Year 2019)               | (Year 1990)                                    | (Year 2019)     | (Year 1990–Year 2019)                                   |
| Belarus                | 10900 (7733 to 13970)     | 9342 (6561 to 12215)      | 95 (67 to 121)                                 | 78 (55 to 102)  | -17.1% (-23.2% to -11.3%)                               |
| Estonia                | 1886 (1327 to 2431)       | 1225 (867 to 1610)        | 107 (76 to 138)                                | 74 (52 to 97)   | -31.1% (-36.6% to -25.5%)                               |
| Latvia                 | 3483 (2489 to 4452)       | 1823 (1280 to 2382)       | 115 (82 to 147)                                | 75 (52 to 98)   | -35.2% (-40.3% to -29.8%)                               |
| Lithuania              | 4346 (3095 to 5557)       | 3002 (2125 to 3902)       | 107 (76 to 137)                                | 82 (57 to 107)  | -23.5% (-29.2% to -17.6%)                               |
| Republic of Moldova    | 4120 (2959 to 5252)       | 3227 (2279 to 4171)       | 90 (65 to 114)                                 | 71 (50 to 92)   | -21.1% (-27.6% to -14.2%)                               |
| Russian Federation     | 184998 (131132 to 235248) | 156702 (111813 to 202955) | 111 (78 to 141)                                | 87 (62 to 112)  | -21.5% (-25.9% to -15%)                                 |
| Ukraine                | 61912 (43941 to 79689)    | 44214 (31275 to 57074)    | 104 (74 to 133)                                | 82 (58 to 106)  | -21% (-27.4% to -13.3%)                                 |
| <b>Central Europe</b>  | 134251 (96558 to 170285)  | 132314 (94264 to 171655)  | 100 (72 to 127)                                | 92 (65 to 119)  | -8.4% (-13% to -2%)                                     |
| Albania                | 2910 (2092 to 3738)       | 3007 (2094 to 3962)       | 99 (71 to 127)                                 | 93 (65 to 123)  | -6.2% (-15.9% to 8.6%)                                  |
| Bosnia and Herzegovina | 4834 (3424 to 6442)       | 6377 (3687 to 12037)      | 101 (72 to 135)                                | 156 (90 to 302) | 54.5% (11.7% to 130.8%)                                 |
| Bulgaria               | 9803 (6941 to 12610)      | 7357 (5223 to 9532)       | 99 (70 to 127)                                 | 86 (61 to 112)  | -12.6% (-19% to -6.2%)                                  |
| Croatia                | 5550 (3949 to 7139)       | 5690 (4019 to 7402)       | 99 (70 to 128)                                 | 102 (73 to 134) | 3.4% (-5.4% to 16.5%)                                   |
| Czechia                | 12202 (8618 to 15787)     | 13522 (9535 to 17554)     | 105 (75 to 136)                                | 99 (70 to 130)  | -5.7% (-11.9% to 1.4%)                                  |
| Hungary                | 11949 (8547 to 15269)     | 10581 (7521 to 13774)     | 99 (70 to 127)                                 | 85 (60 to 112)  | -13.9% (-20.6% to -6.4%)                                |
| Montenegro             | 587 (418 to 757)          | 657 (462 to 856)          | 91 (64 to 117)                                 | 88 (62 to 115)  | -2.5% (-8.6% to 4.4%)                                   |
| North Macedonia        | 1697 (1189 to 2167)       | 2107 (1487 to 2725)       | 81 (57 to 104)                                 | 81 (57 to 105)  | -1.1% (-9.3% to 7.5%)                                   |
| Poland                 | 40801 (29267 to 51706)    | 43601 (30773 to 56420)    | 100 (71 to 126)                                | 89 (63 to 115)  | -11.1% (-15.6% to -6.8%)                                |

| Location                    | YLD                       |                           |                                                |                 |                                                         |
|-----------------------------|---------------------------|---------------------------|------------------------------------------------|-----------------|---------------------------------------------------------|
|                             | Numbers<br>(95% UI)       |                           | Age-standardized rates per 100,000<br>(95% UI) |                 | Percentage change of age-standardized rates<br>(95% UI) |
|                             | (Year 1990)               | (Year 2019)               | (Year 1990)                                    | (Year 2019)     | (Year 1990–Year 2019)                                   |
|                             |                           |                           |                                                |                 |                                                         |
| Romania                     | 26357 (18966 to 33675)    | 19666 (14015 to 25656)    | 104 (75 to 133)                                | 82 (58 to 107)  | -21.2% (-27.4% to -14.7%)                               |
| Serbia                      | 9405 (6815 to 12082)      | 10185 (7050 to 14487)     | 90 (65 to 115)                                 | 98 (67 to 141)  | 9.4% (-8.5% to 47%)                                     |
| Slovakia                    | 5560 (3928 to 7110)       | 6544 (4662 to 8499)       | 99 (70 to 127)                                 | 95 (67 to 123)  | -4.8% (-11.4% to 2%)                                    |
| Slovenia                    | 2596 (1853 to 3396)       | 3019 (2147 to 3976)       | 117 (83 to 153)                                | 109 (77 to 143) | -6.7% (-12.9% to -0.5%)                                 |
| Central Asia                | 38774 (28022 to 49649)    | 55536 (39430 to 73018)    | 64 (46 to 81)                                  | 58 (42 to 76)   | -8.1% (-16.7% to 8%)                                    |
| Armenia                     | 5198 (3146 to 8491)       | 2673 (1793 to 3841)       | 157 (95 to 255)                                | 76 (52 to 108)  | -51.6% (-60% to -40.6%)                                 |
| Azerbaijan                  | 3604 (2571 to 4580)       | 6274 (4363 to 8767)       | 54 (39 to 69)                                  | 54 (38 to 75)   | 0.7% (-14.3% to 25.7%)                                  |
| Georgia                     | 3591 (2566 to 4613)       | 3053 (2133 to 4063)       | 62 (44 to 79)                                  | 73 (50 to 98)   | 18.4% (2.9% to 47.1%)                                   |
| Kazakhstan                  | 10394 (7403 to 13230)     | 11569 (8175 to 14962)     | 66 (47 to 84)                                  | 60 (42 to 78)   | -9.5% (-17.4% to -1.5%)                                 |
| Kyrgyzstan                  | 2318 (1672 to 2968)       | 3234 (2302 to 4195)       | 61 (44 to 77)                                  | 52 (37 to 67)   | -14.5% (-22.7% to -5.2%)                                |
| Mongolia                    | 951 (688 to 1200)         | 2105 (1497 to 2698)       | 55 (40 to 70)                                  | 60 (43 to 77)   | 8.6% (-1.2% to 18.7%)                                   |
| Tajikistan                  | 2367 (1683 to 3005)       | 7748 (4353 to 15772)      | 58 (42 to 73)                                  | 88 (50 to 175)  | 51.2% (-5.1% to 195.3%)                                 |
| Turkmenistan                | 1498 (1072 to 1913)       | 2455 (1756 to 3185)       | 50 (36 to 63)                                  | 48 (35 to 62)   | -2.9% (-13.2% to 10.6%)                                 |
| Uzbekistan                  | 8854 (6375 to 11451)      | 16425 (11580 to 21093)    | 53 (37 to 68)                                  | 49 (35 to 63)   | -6.8% (-15.5% to 2.3%)                                  |
| Latin America and Caribbean | 332236 (236429 to 446580) | 502465 (360265 to 641612) | 99 (71 to 129)                                 | 82 (59 to 105)  | -16.8% (-23.3% to -11.6%)                               |
| Central Latin America       | 152900 (104937 to 229866) | 200134 (142895 to 262800) | 110 (77 to 157)                                | 79 (56 to 103)  | -28.2% (-36.5% to -22.5%)                               |

1  
2

| Location                           | YLD                     |                          |                                                |                 |                                                         |
|------------------------------------|-------------------------|--------------------------|------------------------------------------------|-----------------|---------------------------------------------------------|
|                                    | Numbers<br>(95% UI)     |                          | Age-standardized rates per 100,000<br>(95% UI) |                 | Percentage change of age-standardized rates<br>(95% UI) |
|                                    | (Year 1990)             | (Year 2019)              | (Year 1990)                                    | (Year 2019)     | (Year 1990–Year 2019)                                   |
| Colombia                           | 21868 (15273 to 29497)  | 30489 (20572 to 44447)   | 76 (54 to 100)                                 | 60 (40 to 87)   | -20.9% (-31.5% to -5.8%)                                |
| Costa Rica                         | 1189 (848 to 1554)      | 2299 (1621 to 3010)      | 46 (33 to 59)                                  | 45 (32 to 59)   | -1.7% (-9.7% to 6.7%)                                   |
| El Salvador                        | 14593 (4794 to 41290)   | 7025 (3524 to 16079)     | 280 (95 to 763)                                | 117 (58 to 272) | -58.1% (-65.7% to -38.1%)                               |
| Guatemala                          | 9339 (3905 to 23409)    | 10479 (6703 to 18661)    | 129 (58 to 318)                                | 69 (43 to 127)  | -46.5% (-61.2% to -19%)                                 |
| Honduras                           | 1644 (1189 to 2093)     | 4760 (3333 to 6327)      | 46 (33 to 58)                                  | 54 (38 to 72)   | 18.6% (2.3% to 42.6%)                                   |
| Mexico                             | 83476 (60063 to 105507) | 120381 (86536 to 154329) | 123 (89 to 155)                                | 94 (68 to 121)  | -23.5% (-26.3% to -20.8%)                               |
| Nicaragua                          | 10677 (3015 to 31127)   | 7105 (3061 to 17891)     | 279 (85 to 785)                                | 122 (51 to 309) | -56.3% (-62.6% to -38.9%)                               |
| Panama                             | 1175 (776 to 2105)      | 1936 (1346 to 2667)      | 54 (37 to 92)                                  | 46 (32 to 63)   | -15.1% (-33.7% to -0.8%)                                |
| Venezuela (Bolivarian Republic of) | 8941 (6413 to 11455)    | 15660 (11076 to 20541)   | 55 (40 to 70)                                  | 53 (37 to 69)   | -4.6% (-14.9% to 8%)                                    |
| <b>Andean Latin America</b>        | 17534 (11289 to 29299)  | 26820 (18760 to 38361)   | 52 (35 to 82)                                  | 43 (30 to 62)   | -17.2% (-29.5% to -6.2%)                                |
| Bolivia (Plurinational State of)   | 1861 (1329 to 2351)     | 3779 (2690 to 4811)      | 36 (26 to 45)                                  | 34 (24 to 44)   | -4.1% (-14.5% to 7.3%)                                  |
| Ecuador                            | 3868 (2730 to 5003)     | 7139 (5143 to 9248)      | 47 (33 to 60)                                  | 42 (30 to 54)   | -10.4% (-20.6% to 0.7%)                                 |
| Peru                               | 11805 (6784 to 23027)   | 15903 (10527 to 25226)   | 59 (36 to 108)                                 | 46 (31 to 73)   | -21.7% (-35.3% to -6.6%)                                |
| <b>Caribbean</b>                   | 14906 (10845 to 18906)  | 38262 (24729 to 57334)   | 47 (34 to 59)                                  | 78 (50 to 117)  | 66% (24.4% to 140%)                                     |
| Antigua and Barbuda                | 21 (15 to 27)           | 39 (28 to 51)            | 36 (26 to 47)                                  | 39 (28 to 50)   | 7% (-3.7% to 18.9%)                                     |

40  
41  
42  
43  
44  
45  
46

| Location                         | YLD                       |                           |                                                |                 |                                                         |
|----------------------------------|---------------------------|---------------------------|------------------------------------------------|-----------------|---------------------------------------------------------|
|                                  | Numbers<br>(95% UI)       |                           | Age-standardized rates per 100,000<br>(95% UI) |                 | Percentage change of age-standardized rates<br>(95% UI) |
|                                  | (Year 1990)               | (Year 2019)               | (Year 1990)                                    | (Year 2019)     | (Year 1990–Year 2019)                                   |
| Bahamas                          | 84 (60 to 107)            | 158 (113 to 204)          | 35 (25 to 45)                                  | 38 (27 to 49)   | 7.3% (-4.3% to 19.8%)                                   |
| Barbados                         | 88 (64 to 112)            | 124 (89 to 159)           | 34 (25 to 43)                                  | 35 (25 to 45)   | 2.7% (-8.5% to 14.3%)                                   |
| Belize                           | 59 (42 to 77)             | 173 (126 to 226)          | 41 (30 to 53)                                  | 45 (33 to 58)   | 8.6% (-1.2% to 19.7%)                                   |
| Bermuda                          | 50 (36 to 65)             | 69 (49 to 89)             | 76 (54 to 98)                                  | 81 (58 to 105)  | 7% (-1.8% to 16.5%)                                     |
| Cuba                             | 5056 (3569 to 6436)       | 6504 (4662 to 8469)       | 46 (33 to 58)                                  | 45 (32 to 59)   | -2.1% (-10.9% to 8.4%)                                  |
| Dominica                         | 24 (17 to 32)             | 32 (23 to 42)             | 36 (26 to 48)                                  | 42 (30 to 54)   | 15.1% (-0.4% to 32.9%)                                  |
| Dominican Republic               | 2235 (1614 to 2834)       | 4755 (3410 to 6125)       | 38 (28 to 48)                                  | 44 (32 to 57)   | 15.7% (4.1% to 28.6%)                                   |
| Grenada                          | 37 (23 to 70)             | 48 (33 to 62)             | 49 (31 to 89)                                  | 42 (30 to 56)   | -13.7% (-40% to 12.3%)                                  |
| Guyana                           | 260 (189 to 331)          | 328 (235 to 416)          | 39 (28 to 49)                                  | 43 (30 to 54)   | 10.3% (-1.2% to 22.8%)                                  |
| Haiti                            | 1824 (1321 to 2337)       | 18498 (8950 to 34403)     | 35 (25 to 44)                                  | 158 (77 to 294) | 354.7% (143.5% to 723.4%)                               |
| Jamaica                          | 786 (568 to 1021)         | 1076 (769 to 1376)        | 38 (27 to 49)                                  | 36 (26 to 46)   | -5.2% (-16.3% to 5.6%)                                  |
| Puerto Rico                      | 3152 (2227 to 4050)       | 4044 (2883 to 5316)       | 87 (61 to 112)                                 | 88 (62 to 116)  | 1.7% (-7.9% to 14.7%)                                   |
| Saint Kitts and Nevis            | 25 (18 to 31)             | 50 (35 to 64)             | 68 (49 to 86)                                  | 74 (52 to 96)   | 9.5% (-1.6% to 21.3%)                                   |
| Saint Lucia                      | 42 (30 to 54)             | 78 (57 to 100)            | 37 (27 to 47)                                  | 39 (28 to 50)   | 6.4% (-4.5% to 18.9%)                                   |
| Saint Vincent and the Grenadines | 32 (23 to 40)             | 47 (33 to 60)             | 35 (25 to 44)                                  | 38 (27 to 48)   | 8.8% (-2.7% to 22.4%)                                   |
| Suriname                         | 160 (108 to 261)          | 249 (178 to 326)          | 45 (30 to 70)                                  | 41 (29 to 54)   | -8.7% (-31.4% to 7.7%)                                  |
| Trinidad and Tobago              | 390 (278 to 506)          | 606 (436 to 779)          | 35 (25 to 45)                                  | 38 (27 to 49)   | 8% (-4% to 21%)                                         |
| United States Virgin Islands     | 84 (61 to 106)            | 88 (63 to 113)            | 80 (58 to 101)                                 | 70 (50 to 90)   | -12.5% (-19.5% to -4.7%)                                |
| <b>Tropical Latin America</b>    | 146895 (104835 to 186002) | 237248 (169890 to 302343) | 111 (80 to 140)                                | 97 (69 to 124)  | -12.9% (-16.6% to -9%)                                  |
| Brazil                           | 145402 (103654 to 184192) | 234431 (167899 to 298702) | 113 (81 to 142)                                | 98 (70 to 126)  | -12.8% (-16.6% to -8.8%)                                |
| Paraguay                         | 1494 (1070 to 1924)       | 2818 (2022 to 3605)       | 46 (33 to 59)                                  | 42 (30 to 53)   | -9.7% (-19% to 0.3%)                                    |

| Location                               | YLD                         |                              |                                                |                |                                                         |
|----------------------------------------|-----------------------------|------------------------------|------------------------------------------------|----------------|---------------------------------------------------------|
|                                        | Numbers<br>(95% UI)         |                              | Age-standardized rates per 100,000<br>(95% UI) |                | Percentage change of age-standardized rates<br>(95% UI) |
|                                        | (Year 1990)                 | (Year 2019)                  | (Year 1990)                                    | (Year 2019)    | (Year 1990–Year 2019)                                   |
| Southeast Asia, East Asia, and Oceania | 1002681 (732643 to 1259197) | 1805371 (1289643 to 2309733) | 65 (48 to 82)                                  | 69 (50 to 89)  | 6.6% (0.1% to 12.2%)                                    |
| East Asia                              | 742342 (531641 to 940603)   | 1388823 (979243 to 1793841)  | 65 (46 to 82)                                  | 72 (51 to 94)  | 11.1% (5% to 16.9%)                                     |
| China                                  | 731470 (523591 to 926331)   | 1373726 (968118 to 1774815)  | 66 (47 to 84)                                  | 74 (52 to 96)  | 11.4% (5.2% to 17.3%)                                   |
| Democratic People's Republic of Korea  | 4753 (3395 to 6097)         | 7008 (5007 to 9073)          | 24 (17 to 30)                                  | 23 (16 to 29)  | -5.3% (-16.1% to 6.9%)                                  |
| Taiwan (Province of China)             | 6119 (4255 to 8025)         | 8089 (5746 to 10379)         | 31 (22 to 41)                                  | 25 (18 to 32)  | -19.9% (-28.7% to -10.2%)                               |
| Southeast Asia                         | 258828 (180465 to 372095)   | 412470 (297995 to 546543)    | 65 (46 to 89)                                  | 59 (43 to 77)  | -9.3% (-22.4% to -0.7%)                                 |
| Cambodia                               | 13370 (3463 to 42654)       | 10238 (5454 to 22190)        | 137 (41 to 421)                                | 67 (35 to 146) | -51.2% (-67.5% to -7.9%)                                |
| Indonesia                              | 138111 (102139 to 173454)   | 210217 (153290 to 266273)    | 89 (66 to 111)                                 | 79 (57 to 99)  | -11.5% (-17.9% to -6%)                                  |
| Lao People's Democratic Republic       | 1114 (814 to 1425)          | 2208 (1612 to 2785)          | 34 (25 to 43)                                  | 34 (25 to 43)  | -0.3% (-11.3% to 13%)                                   |
| Malaysia                               | 5366 (3824 to 6836)         | 11627 (8356 to 15152)        | 37 (26 to 47)                                  | 36 (26 to 47)  | -1% (-11.4% to 9.7%)                                    |
| Maldives                               | 44 (32 to 57)               | 164 (116 to 219)             | 29 (21 to 36)                                  | 32 (23 to 42)  | 12% (-3% to 28.5%)                                      |
| Mauritius                              | 622 (444 to 798)            | 1072 (778 to 1385)           | 60 (43 to 77)                                  | 69 (50 to 89)  | 16.5% (6.5% to 28.1%)                                   |
| Myanmar                                | 18809 (10422 to 43265)      | 33553 (21725 to 50386)       | 50 (29 to 108)                                 | 61 (40 to 90)  | 21.5% (-27.4% to 83.6%)                                 |
| Philippines                            | 26715 (16967 to 47094)      | 43970 (30346 to 63181)       | 51 (33 to 84)                                  | 43 (30 to 61)  | -16.1% (-31.3% to -5.4%)                                |
| Seychelles                             | 43 (31 to 54)               | 81 (58 to 104)               | 67 (49 to 85)                                  | 70 (50 to 89)  | 4.2% (-5.1% to 13.7%)                                   |

| Location                         | YLD                    |                        |                                                |                 |                                                         |
|----------------------------------|------------------------|------------------------|------------------------------------------------|-----------------|---------------------------------------------------------|
|                                  | Numbers<br>(95% UI)    |                        | Age-standardized rates per 100,000<br>(95% UI) |                 | Percentage change of age-standardized rates<br>(95% UI) |
|                                  | (Year 1990)            | (Year 2019)            | (Year 1990)                                    | (Year 2019)     | (Year 1990–Year 2019)                                   |
| Sri Lanka                        | 10662 (6172 to 20907)  | 24070 (12260 to 51620) | 64 (39 to 120)                                 | 102 (51 to 222) | 58.3% (18.7% to 104.8%)                                 |
| Thailand                         | 23282 (16627 to 29397) | 31982 (23052 to 41443) | 44 (32 to 56)                                  | 36 (26 to 47)   | -18.5% (-27.3% to -8.7%)                                |
| Timor-Leste                      | 1261 (429 to 3464)     | 1479 (569 to 3897)     | 167 (60 to 449)                                | 143 (55 to 377) | -13.8% (-21% to -3.4%)                                  |
| Viet Nam                         | 19083 (14045 to 24179) | 41271 (29846 to 53245) | 35 (26 to 45)                                  | 39 (28 to 50)   | 10.7% (-0.9% to 22.5%)                                  |
| <b>Oceania</b>                   | 1511 (1114 to 1906)    | 4077 (2923 to 5215)    | 30 (22 to 37)                                  | 36 (26 to 46)   | 21.8% (9.6% to 35.9%)                                   |
| American Samoa                   | 24 (17 to 31)          | 37 (27 to 48)          | 64 (46 to 81)                                  | 70 (50 to 90)   | 9.8% (-1.8% to 25.5%)                                   |
| Cook Islands                     | 11 (8 to 15)           | 15 (10 to 19)          | 70 (50 to 91)                                  | 72 (50 to 93)   | 2.5% (-8.3% to 14.2%)                                   |
| Fiji                             | 172 (123 to 221)       | 261 (188 to 336)       | 26 (19 to 33)                                  | 28 (21 to 37)   | 9% (-2.8% to 23.3%)                                     |
| Guam                             | 79 (57 to 103)         | 119 (85 to 153)        | 65 (47 to 84)                                  | 66 (48 to 85)   | 1.8% (-6.7% to 10.4%)                                   |
| Kiribati                         | 13 (9 to 16)           | 24 (18 to 32)          | 20 (14 to 25)                                  | 22 (16 to 29)   | 13.4% (-3.8% to 34.3%)                                  |
| Marshall Islands                 | 9 (6 to 11)            | 15 (11 to 20)          | 28 (20 to 35)                                  | 28 (21 to 36)   | 2.3% (-8.9% to 13.9%)                                   |
| Micronesia (Federated States of) | 21 (15 to 27)          | 29 (21 to 37)          | 28 (20 to 35)                                  | 30 (22 to 39)   | 9.9% (-3.7% to 25%)                                     |
| Nauru                            | 4 (3 to 6)             | 5 (4 to 7)             | 53 (39 to 68)                                  | 58 (42 to 76)   | 9.8% (-1.2% to 21.3%)                                   |
| Niue                             | 1 (1 to 1)             | 1 (1 to 1)             | 53 (38 to 68)                                  | 62 (45 to 81)   | 17.5% (4.5% to 32%)                                     |
| Northern Mariana Islands         | 29 (21 to 38)          | 36 (26 to 47)          | 71 (51 to 92)                                  | 70 (51 to 91)   | -1.5% (-9.6% to 7.2%)                                   |
| Palau                            | 10 (7 to 13)           | 17 (12 to 22)          | 72 (51 to 93)                                  | 78 (56 to 101)  | 9% (-2.3% to 21.4%)                                     |
| Papua New Guinea                 | 882 (641 to 1113)      | 2956 (2106 to 3811)    | 28 (20 to 35)                                  | 36 (26 to 46)   | 29.8% (12.9% to 50.1%)                                  |
| Samoa                            | 37 (26 to 47)          | 79 (54 to 108)         | 29 (21 to 37)                                  | 42 (29 to 57)   | 44.1% (19% to 79.9%)                                    |
| Solomon Islands                  | 75 (54 to 99)          | 175 (126 to 225)       | 30 (22 to 39)                                  | 32 (23 to 41)   | 7.7% (-5.6% to 21.6%)                                   |
| Tokelau                          | 1 (1 to 1)             | 1 (1 to 1)             | 53 (38 to 67)                                  | 60 (43 to 77)   | 13.5% (2% to 25.3%)                                     |
| Tonga                            | 20 (14 to 26)          | 25 (18 to 32)          | 27 (19 to 35)                                  | 27 (20 to 36)   | 1.7% (-11.3% to 16.3%)                                  |

1  
2

| Location                     | YLD                       |                            |                                                |                  |                                                         |
|------------------------------|---------------------------|----------------------------|------------------------------------------------|------------------|---------------------------------------------------------|
|                              | Numbers<br>(95% UI)       |                            | Age-standardized rates per 100,000<br>(95% UI) |                  | Percentage change of age-standardized rates<br>(95% UI) |
|                              | (Year 1990)               | (Year 2019)                | (Year 1990)                                    | (Year 2019)      | (Year 1990–Year 2019)                                   |
| Tuvalu                       | 4 (3 to 5)                | 6 (5 to 8)                 | 50 (36 to 63)                                  | 56 (41 to 72)    | 13.4% (1.5% to 27%)                                     |
| Vanuatu                      | 34 (24 to 46)             | 84 (59 to 112)             | 29 (20 to 38)                                  | 33 (24 to 44)    | 15.3% (0.2% to 31.9%)                                   |
| North Africa and Middle East | 304143 (139079 to 722558) | 564189 (289631 to 1229092) | 97 (48 to 219)                                 | 92 (48 to 199)   | -5.4% (-27.6% to 12.3%)                                 |
| North Africa and Middle East | 304143 (139079 to 722558) | 564189 (289631 to 1229092) | 97 (48 to 219)                                 | 92 (48 to 199)   | -5.4% (-27.6% to 12.3%)                                 |
| Afghanistan                  | 76762 (9561 to 311279)    | 98889 (26400 to 287537)    | 694 (91 to 2785)                               | 342 (87 to 1016) | -50.7% (-67.5% to 33%)                                  |
| Algeria                      | 8738 (6214 to 11266)      | 21542 (14186 to 32871)     | 45 (32 to 57)                                  | 50 (33 to 76)    | 12.2% (-11.6% to 62.6%)                                 |
| Bahrain                      | 191 (136 to 251)          | 716 (501 to 939)           | 40 (29 to 52)                                  | 39 (28 to 51)    | -2.1% (-13.7% to 11.7%)                                 |
| Egypt                        | 14451 (10269 to 18383)    | 28971 (20531 to 37521)     | 31 (22 to 39)                                  | 31 (22 to 40)    | 0.7% (-11.7% to 16.9%)                                  |
| Iran (Islamic Republic of)   | 58541 (29148 to 128645)   | 58925 (36923 to 97182)     | 122 (63 to 265)                                | 63 (40 to 102)   | -48.3% (-62.5% to -29.6%)                               |
| Iraq                         | 59709 (18003 to 169919)   | 106419 (35020 to 295453)   | 370 (113 to 1039)                              | 265 (90 to 729)  | -28.6% (-37.1% to -18.4%)                               |
| Jordan                       | 973 (690 to 1251)         | 3679 (2567 to 4814)        | 36 (25 to 45)                                  | 34 (24 to 45)    | -3.2% (-14.6% to 11.5%)                                 |
| Kuwait                       | 810 (547 to 1160)         | 2655 (1727 to 4220)        | 50 (34 to 68)                                  | 52 (34 to 80)    | 4.4% (-10.2% to 21%)                                    |
| Lebanon                      | 10077 (2378 to 32728)     | 7227 (2416 to 20570)       | 322 (78 to 1057)                               | 135 (45 to 386)  | -58.1% (-63.8% to -41.5%)                               |
| Libya                        | 2072 (1260 to 3768)       | 7366 (3820 to 15730)       | 60 (39 to 98)                                  | 100 (52 to 215)  | 67.9% (21.6% to 123.9%)                                 |
| Morocco                      | 10116 (7230 to 13770)     | 15820 (11427 to 20411)     | 47 (34 to 63)                                  | 43 (31 to 55)    | -9.1% (-21.4% to 2.7%)                                  |

40  
41  
42  
43  
44  
45  
46



1  
2  
3  
4  
5  
6  
7  
8  
9  
10  
11  
12  
13  
14  
15  
16  
17  
18  
19  
20  
21  
22  
23  
24  
25  
26  
27  
28  
29  
30  
31  
32  
33  
34  
35  
36  
37  
38  
39  
40  
41  
42  
43  
44  
45  
46

| Location             | YLD                       |                             |                                                |                   |                                                         |
|----------------------|---------------------------|-----------------------------|------------------------------------------------|-------------------|---------------------------------------------------------|
|                      | Numbers<br>(95% UI)       |                             | Age-standardized rates per 100,000<br>(95% UI) |                   | Percentage change of age-standardized rates<br>(95% UI) |
|                      | (Year 1990)               | (Year 2019)                 | (Year 1990)                                    | (Year 2019)       | (Year 1990–Year 2019)                                   |
| Oman                 | 739 (530 to 954)          | 2116 (1481 to 2770)         | 48 (35 to 62)                                  | 44 (31 to 58)     | -7.8% (-17.9% to 4.1%)                                  |
| Palestine            | 5353 (1742 to 14840)      | 13321 (4255 to 37063)       | 283 (97 to 746)                                | 309 (100 to 843)  | 9.3% (-5.8% to 17.9%)                                   |
| Qatar                | 255 (183 to 323)          | 1525 (1072 to 2024)         | 57 (41 to 71)                                  | 47 (33 to 61)     | -17.5% (-26.8% to -8.3%)                                |
| Saudi Arabia         | 8009 (5687 to 10303)      | 28027 (19946 to 36763)      | 66 (48 to 85)                                  | 71 (50 to 92)     | 6.2% (-3.8% to 16.6%)                                   |
| Sudan                | 12460 (8534 to 19490)     | 31938 (20436 to 55444)      | 79 (56 to 116)                                 | 96 (63 to 164)    | 22.2% (5.5% to 42.6%)                                   |
| Syrian Arab Republic | 6334 (2931 to 15535)      | 56665 (16102 to 159728)     | 59 (31 to 139)                                 | 403 (113 to 1150) | 579.2% (218.2% to 1263.6%)                              |
| Tunisia              | 2730 (1975 to 3497)       | 4717 (3406 to 6139)         | 39 (28 to 50)                                  | 37 (26 to 48)     | -5.7% (-16% to 5.6%)                                    |
| Turkey               | 18251 (13258 to 23147)    | 40162 (27330 to 56767)      | 35 (25 to 45)                                  | 44 (30 to 62)     | 24.2% (3.7% to 55.5%)                                   |
| United Arab Emirates | 880 (633 to 1129)         | 5464 (3826 to 7080)         | 48 (35 to 61)                                  | 43 (31 to 55)     | -11.1% (-21.3% to -1.1%)                                |
| Yemen                | 6487 (3619 to 13350)      | 27471 (12186 to 66369)      | 59 (36 to 109)                                 | 101 (46 to 238)   | 70.7% (18.8% to 131.1%)                                 |
| South Asia           | 494741 (363959 to 612135) | 1076209 (779951 to 1354932) | 56 (42 to 70)                                  | 63 (46 to 79)     | 11.9% (7.6% to 17%)                                     |
| South Asia           | 494741 (363959 to 612135) | 1076209 (779951 to 1354932) | 56 (42 to 70)                                  | 63 (46 to 79)     | 11.9% (7.6% to 17%)                                     |
| Bangladesh           | 32876 (23818 to 42290)    | 77231 (55316 to 100459)     | 40 (29 to 51)                                  | 50 (36 to 64)     | 24% (11% to 38.2%)                                      |
| Bhutan               | 201 (144 to 251)          | 399 (292 to 506)            | 45 (32 to 56)                                  | 55 (40 to 69)     | 22.8% (10.6% to 37.1%)                                  |

1  
2

| Location                    | YLD                       |                            |                                                |                |                                                         |
|-----------------------------|---------------------------|----------------------------|------------------------------------------------|----------------|---------------------------------------------------------|
|                             | Numbers<br>(95% UI)       |                            | Age-standardized rates per 100,000<br>(95% UI) |                | Percentage change of age-standardized rates<br>(95% UI) |
|                             | (Year 1990)               | (Year 2019)                | (Year 1990)                                    | (Year 2019)    | (Year 1990–Year 2019)                                   |
| India                       | 425838 (312874 to 527008) | 887447 (644356 to 1112943) | 61 (45 to 75)                                  | 66 (48 to 82)  | 8% (4.1% to 11.6%)                                      |
| Nepal                       | 6953 (5034 to 8814)       | 18091 (12597 to 24724)     | 47 (34 to 58)                                  | 64 (45 to 87)  | 37.6% (17.1% to 70.8%)                                  |
| Pakistan                    | 28874 (21063 to 36036)    | 93040 (65998 to 127413)    | 35 (26 to 44)                                  | 51 (36 to 67)  | 42.7% (25.2% to 72.6%)                                  |
| Sub-Saharan Africa          | 285149 (188516 to 479224) | 635020 (432096 to 1003966) | 75 (52 to 119)                                 | 77 (54 to 119) | 3.6% (-1% to 8%)                                        |
| Southern Sub-Saharan Africa | 31705 (22957 to 40483)    | 41857 (29959 to 52588)     | 75 (54 to 95)                                  | 56 (40 to 71)  | -25.2% (-30.8% to -21.5%)                               |
| Botswana                    | 561 (412 to 719)          | 1274 (907 to 1617)         | 56 (41 to 71)                                  | 57 (41 to 72)  | 1.6% (-7.7% to 11%)                                     |
| Eswatini                    | 321 (232 to 406)          | 514 (364 to 646)           | 57 (41 to 71)                                  | 52 (37 to 65)  | -9% (-17.2% to -1%)                                     |
| Lesotho                     | 788 (562 to 993)          | 984 (707 to 1254)          | 55 (39 to 68)                                  | 50 (36 to 63)  | -8.8% (-18.1% to 1.3%)                                  |
| Namibia                     | 1241 (695 to 2583)        | 1421 (1015 to 1872)        | 104 (62 to 200)                                | 68 (49 to 91)  | -34.3% (-58.3% to -9.7%)                                |
| South Africa                | 24873 (17886 to 31878)    | 31489 (22407 to 39715)     | 81 (58 to 103)                                 | 57 (41 to 71)  | -29.5% (-35.4% to -25.5%)                               |
| Zimbabwe                    | 3920 (2824 to 5003)       | 6175 (4495 to 7836)        | 54 (38 to 68)                                  | 51 (37 to 64)  | -5.5% (-13.4% to 4%)                                    |
| Western Sub-Saharan Africa  | 92325 (67628 to 115005)   | 248091 (181695 to 324936)  | 67 (49 to 84)                                  | 76 (55 to 98)  | 12.7% (7.9% to 22.6%)                                   |
| Benin                       | 2223 (1613 to 2804)       | 6408 (4564 to 8217)        | 70 (51 to 88)                                  | 75 (54 to 95)  | 6.9% (-1.8% to 15.3%)                                   |
| Burkina Faso                | 3910 (2830 to 4923)       | 11871 (8646 to 14957)      | 60 (44 to 76)                                  | 77 (56 to 96)  | 27.4% (17.5% to 38.4%)                                  |
| Cabo Verde                  | 172 (123 to 217)          | 381 (274 to 483)           | 66 (48 to 83)                                  | 72 (52 to 92)  | 9.3% (-0.1% to 18.9%)                                   |

39  
40  
41  
42  
43  
44  
45  
46

1  
2  
3  
4  
5  
6  
7  
8  
9  
10  
11  
12  
13  
14  
15  
16  
17  
18  
19  
20  
21  
22  
23  
24  
25  
26  
27  
28  
29  
30  
31  
32  
33  
34  
35  
36  
37  
38  
39  
40  
41  
42  
43  
44  
45  
46

| Location                   | YLD                      |                           |                                                |                 |                                                         |
|----------------------------|--------------------------|---------------------------|------------------------------------------------|-----------------|---------------------------------------------------------|
|                            | Numbers<br>(95% UI)      |                           | Age-standardized rates per 100,000<br>(95% UI) |                 | Percentage change of age-standardized rates<br>(95% UI) |
|                            | (Year 1990)              | (Year 2019)               | (Year 1990)                                    | (Year 2019)     | (Year 1990–Year 2019)                                   |
| Cameroon                   | 5866 (4309 to 7377)      | 17898 (12839 to 23285)    | 82 (60 to 103)                                 | 83 (60 to 106)  | 1.3% (-7.4% to 11.4%)                                   |
| Chad                       | 4323 (2513 to 8625)      | 8833 (6084 to 13034)      | 95 (59 to 174)                                 | 87 (61 to 127)  | -8.5% (-28.9% to 13.2%)                                 |
| Côte d'Ivoire              | 5561 (3972 to 6998)      | 14737 (10567 to 18642)    | 68 (49 to 84)                                  | 75 (54 to 94)   | 10.8% (2% to 21%)                                       |
| Gambia                     | 487 (342 to 711)         | 1107 (798 to 1405)        | 71 (51 to 97)                                  | 68 (50 to 86)   | -4.5% (-20% to 7.7%)                                    |
| Ghana                      | 7883 (5582 to 9921)      | 22174 (15891 to 28290)    | 74 (53 to 93)                                  | 86 (62 to 109)  | 16.2% (7.7% to 24.7%)                                   |
| Guinea                     | 3086 (2202 to 3879)      | 6731 (4870 to 8518)       | 68 (49 to 85)                                  | 76 (56 to 96)   | 11.3% (2.1% to 21.5%)                                   |
| Guinea-Bissau              | 541 (393 to 678)         | 1184 (852 to 1523)        | 76 (55 to 95)                                  | 83 (61 to 106)  | 9.6% (-0.1% to 23.1%)                                   |
| Liberia                    | 1189 (810 to 1884)       | 3991 (2373 to 7994)       | 77 (54 to 113)                                 | 105 (63 to 203) | 37.1% (7.1% to 82%)                                     |
| Mali                       | 4043 (2894 to 5063)      | 13001 (8825 to 20343)     | 66 (47 to 83)                                  | 88 (62 to 138)  | 33.8% (10.1% to 88.8%)                                  |
| Mauritania                 | 1351 (979 to 1701)       | 2685 (1935 to 3434)       | 92 (67 to 116)                                 | 89 (64 to 114)  | -2.8% (-9.4% to 4.2%)                                   |
| Niger                      | 3532 (2571 to 4467)      | 10196 (7356 to 12935)     | 68 (50 to 85)                                  | 73 (53 to 92)   | 6.6% (-1.7% to 16%)                                     |
| Nigeria                    | 41034 (29577 to 51422)   | 107235 (77703 to 141553)  | 62 (45 to 78)                                  | 69 (50 to 89)   | 11.4% (5% to 25.7%)                                     |
| Sao Tome and Principe      | 67 (48 to 85)            | 145 (103 to 185)          | 78 (56 to 98)                                  | 88 (63 to 112)  | 13.4% (4.8% to 21.6%)                                   |
| Senegal                    | 3421 (2430 to 4303)      | 8308 (6023 to 10410)      | 66 (47 to 84)                                  | 74 (54 to 92)   | 10.9% (3.2% to 21.2%)                                   |
| Sierra Leone               | 1766 (1285 to 2206)      | 6286 (4171 to 10476)      | 65 (48 to 81)                                  | 101 (67 to 167) | 55.4% (19% to 138.8%)                                   |
| Togo                       | 1867 (1351 to 2362)      | 4915 (3518 to 6243)       | 77 (55 to 97)                                  | 79 (57 to 99)   | 2.5% (-4.9% to 10.6%)                                   |
| Eastern Sub-Saharan Africa | 137377 (79383 to 292137) | 279864 (176063 to 502643) | 89 (55 to 175)                                 | 90 (57 to 161)  | 1.1% (-10.4% to 8.8%)                                   |

1  
2  
3  
4  
5  
6  
7  
8  
9  
10  
11  
12  
13  
14  
15  
16  
17  
18  
19  
20  
21  
22  
23  
24  
25  
26  
27  
28  
29  
30  
31  
32  
33  
34  
35  
36  
37  
38  
39  
40  
41  
42  
43  
44  
45  
46

| Location                    | YLD                    |                         |                                                |                  |                                                         |
|-----------------------------|------------------------|-------------------------|------------------------------------------------|------------------|---------------------------------------------------------|
|                             | Numbers<br>(95% UI)    |                         | Age-standardized rates per 100,000<br>(95% UI) |                  | Percentage change of age-standardized rates<br>(95% UI) |
|                             | (Year 1990)            | (Year 2019)             | (Year 1990)                                    | (Year 2019)      | (Year 1990–Year 2019)                                   |
| Burundi                     | 1295 (929 to 1654)     | 29623 (9258 to 84723)   | 31 (23 to 39)                                  | 306 (98 to 849)  | 883.9% (217.8% to 2582.5%)                              |
| Comoros                     | 334 (246 to 421)       | 678 (490 to 855)        | 99 (72 to 125)                                 | 106 (77 to 133)  | 7.2% (-0.2% to 14.6%)                                   |
| Djibouti                    | 297 (215 to 375)       | 952 (678 to 1230)       | 88 (64 to 111)                                 | 91 (65 to 117)   | 3.2% (-6.4% to 15.6%)                                   |
| Eritrea                     | 12654 (3458 to 39163)  | 9577 (4639 to 23553)    | 444 (132 to 1272)                              | 183 (90 to 458)  | -58.8% (-68.2% to -30.2%)                               |
| Ethiopia                    | 34524 (16633 to 80823) | 56868 (30373 to 121962) | 75 (40 to 161)                                 | 72 (39 to 155)   | -4.2% (-17.5% to 20%)                                   |
| Kenya                       | 5256 (3826 to 6541)    | 15246 (11075 to 20379)  | 33 (24 to 41)                                  | 36 (27 to 47)    | 11.1% (2% to 31.2%)                                     |
| Madagascar                  | 7170 (5120 to 8972)    | 17061 (12159 to 21638)  | 83 (59 to 103)                                 | 82 (59 to 104)   | -0.5% (-8.3% to 8.6%)                                   |
| Malawi                      | 4380 (3111 to 5585)    | 9618 (6811 to 12315)    | 62 (45 to 79)                                  | 70 (50 to 87)    | 11.8% (3.4% to 21%)                                     |
| Mozambique                  | 21792 (9745 to 57111)  | 20719 (14681 to 29422)  | 196 (97 to 475)                                | 102 (72 to 150)  | -48% (-69.8% to -14.4%)                                 |
| Rwanda                      | 4886 (3490 to 6178)    | 25354 (11173 to 61782)  | 93 (67 to 117)                                 | 242 (109 to 579) | 159.4% (28.5% to 491.7%)                                |
| Somalia                     | 5141 (2845 to 14541)   | 16214 (10017 to 30965)  | 91 (54 to 224)                                 | 106 (67 to 192)  | 16.4% (-38.5% to 74.2%)                                 |
| South Sudan                 | 5006 (3293 to 8245)    | 9635 (5876 to 18305)    | 111 (77 to 173)                                | 136 (87 to 248)  | 22.8% (4.4% to 47%)                                     |
| Uganda                      | 18110 (8333 to 46907)  | 26128 (18352 to 37337)  | 125 (62 to 297)                                | 93 (65 to 134)   | -25.7% (-56.4% to 17.9%)                                |
| United Republic of Tanzania | 13056 (9286 to 16460)  | 32929 (23333 to 41503)  | 70 (51 to 88)                                  | 78 (56 to 99)    | 11.5% (3.6% to 20.7%)                                   |

1  
2  
3  
4  
5  
6  
7  
8  
9  
10  
11  
12  
13  
14  
15  
16  
17  
18  
19  
20  
21  
22  
23  
24  
25  
26  
27  
28  
29  
30  
31  
32  
33  
34  
35  
36  
37  
38  
39  
40  
41  
42  
43  
44  
45  
46

| Location                         | YLD                    |                         |                                                |                |                                                         |
|----------------------------------|------------------------|-------------------------|------------------------------------------------|----------------|---------------------------------------------------------|
|                                  | Numbers<br>(95% UI)    |                         | Age-standardized rates per 100,000<br>(95% UI) |                | Percentage change of age-standardized rates<br>(95% UI) |
|                                  | (Year 1990)            | (Year 2019)             | (Year 1990)                                    | (Year 2019)    | (Year 1990–Year 2019)                                   |
| Zambia                           | 3375 (2402 to 4242)    | 9038 (6509 to 11379)    | 61 (44 to 75)                                  | 66 (48 to 83)  | 9.1% (0.3% to 18.6%)                                    |
| Central Sub-Saharan Africa       | 23742 (12722 to 50625) | 65208 (33786 to 145484) | 50 (29 to 97)                                  | 62 (33 to 135) | 25.3% (8.7% to 40.1%)                                   |
| Angola                           | 14892 (5002 to 40955)  | 18968 (8592 to 46506)   | 150 (55 to 393)                                | 89 (40 to 218) | -40.7% (-48.1% to -25.2%)                               |
| Central African Republic         | 469 (339 to 604)       | 4095 (1737 to 10241)    | 22 (16 to 28)                                  | 79 (36 to 189) | 263.5% (71.3% to 729%)                                  |
| Congo                            | 460 (331 to 594)       | 3607 (1642 to 8799)     | 24 (18 to 31)                                  | 75 (35 to 177) | 208.6% (54.6% to 598.3%)                                |
| Democratic Republic of the Congo | 7603 (5389 to 9605)    | 37780 (20750 to 78035)  | 27 (19 to 33)                                  | 53 (30 to 104) | 99.1% (25.4% to 273.4%)                                 |
| Equatorial Guinea                | 80 (57 to 100)         | 293 (209 to 379)        | 24 (18 to 31)                                  | 26 (19 to 34)  | 7.6% (-5.1% to 22.1%)                                   |
| Gabon                            | 237 (173 to 302)       | 465 (335 to 599)        | 30 (22 to 38)                                  | 30 (22 to 38)  | -0.7% (-11.6% to 11.4%)                                 |

Abbreviations: YLDs, years lived with disability; UI, uncertainty interval

eTable 14. Incidence for 1990 and 2019 and percentage changes of age-standardized rates by location and cause for traumatic brain injury, 1990–2019

| Location    | Cause                                           | Age-standardized rates per 100,000 | Age-standardized rates per | Percentage change of age-standardized rates (95% UI) (1990–2019) |
|-------------|-------------------------------------------------|------------------------------------|----------------------------|------------------------------------------------------------------|
| Afghanistan | Adverse effects of medical treatment            | 0 (0 to 0)                         | 0 (0 to 0)                 | 0% (0% to 0%)                                                    |
| Afghanistan | Conflict and terrorism                          | 81 (31 to 192)                     | 356 (134 to 798)           | NA                                                               |
| Afghanistan | Cyclist road injuries                           | 13 (8 to 18)                       | 11 (8 to 16)               | -11% (-19% to -2.3%)                                             |
| Afghanistan | Drowning                                        | 0 (0 to 0)                         | 0 (0 to 0)                 | -21.3% (0% to -14.7%)                                            |
| Afghanistan | Environmental heat and cold exposure            | 2 (2 to 3)                         | 2 (1 to 3)                 | -1% (-5.5% to 5%)                                                |
| Afghanistan | Executions and police conflict                  | 0 (0 to 0)                         | 2 (1 to 3)                 | NA                                                               |
| Afghanistan | Exposure to forces of nature                    | 0 (0 to 0)                         | 2 (1 to 3)                 | NA                                                               |
| Afghanistan | Falls                                           | 44 (34 to 59)                      | 55 (42 to 72)              | 24.2% (19.4% to 28.9%)                                           |
| Afghanistan | Fire, heat, and hot substances                  | 0 (0 to 1)                         | 0 (0 to 1)                 | -7.4% (-14.7% to 1.7%)                                           |
| Afghanistan | Foreign body in eyes                            | 0 (0 to 0)                         | 0 (0 to 0)                 | 1% (0% to 2.7%)                                                  |
| Afghanistan | Foreign body in other body part                 | 1 (1 to 3)                         | 1 (1 to 3)                 | -1.3% (-5.7% to 4.1%)                                            |
| Afghanistan | Motor vehicle road injuries                     | 28 (22 to 37)                      | 23 (17 to 30)              | -20.2% (-27.4% to -12.5%)                                        |
| Afghanistan | Motorcyclist road injuries                      | 9 (7 to 12)                        | 8 (6 to 11)                | -9.2% (-18.5% to 0.1%)                                           |
| Afghanistan | Non-venomous animal contact                     | 6 (3 to 10)                        | 6 (3 to 10)                | -3.1% (-8.9% to 2.6%)                                            |
| Afghanistan | Other exposure to mechanical forces             | 27 (17 to 42)                      | 26 (16 to 41)              | -4.6% (-10.1% to 1.1%)                                           |
| Afghanistan | Other road injuries                             | 1 (1 to 2)                         | 1 (1 to 2)                 | -5.8% (-16.3% to 5.4%)                                           |
| Afghanistan | Other transport injuries                        | 5 (3 to 6)                         | 5 (4 to 6)                 | 6.1% (0.9% to 11.8%)                                             |
| Afghanistan | Other unintentional injuries                    | 26 (18 to 42)                      | 21 (14 to 32)              | -22.2% (-26.4% to -17.1%)                                        |
| Afghanistan | Pedestrian road injuries                        | 22 (16 to 28)                      | 18 (13 to 23)              | -18.6% (-25.5% to -11.9%)                                        |
| Afghanistan | Physical violence by firearm                    | 0 (0 to 0)                         | 0 (0 to 0)                 | 45% (20.6% to 75.7%)                                             |
| Afghanistan | Physical violence by other means                | 27 (19 to 37)                      | 27 (19 to 38)              | 1.8% (-5.7% to 9.1%)                                             |
| Afghanistan | Physical violence by sharp object               | 2 (2 to 4)                         | 2 (1 to 3)                 | -19.8% (-28% to -11.2%)                                          |
| Afghanistan | Poisoning by carbon monoxide                    | 0 (0 to 0)                         | 0 (0 to 0)                 | 30.9% (18.2% to 45.6%)                                           |
| Afghanistan | Poisoning by other means                        | 0 (0 to 0)                         | 0 (0 to 0)                 | -16.5% (-24.2% to -8.8%)                                         |
| Afghanistan | Pulmonary aspiration and foreign body in airway | 0 (0 to 1)                         | 0 (0 to 1)                 | -22.3% (-31.1% to -13.1%)                                        |
| Afghanistan | Self-harm by firearm                            | 0 (0 to 0)                         | 0 (0 to 0)                 | 14.6% (3.2% to 27.3%)                                            |
| Afghanistan | Self-harm by other specified means              | 1 (1 to 2)                         | 1 (1 to 1)                 | -10.7% (-15.7% to -5.6%)                                         |
| Afghanistan | Unintentional firearm injuries                  | 1 (1 to 2)                         | 1 (1 to 2)                 | -2.2% (-10.8% to 7.5%)                                           |
| Afghanistan | Venomous animal contact                         | 3 (1 to 7)                         | 3 (1 to 7)                 | -1.3% (-8.1% to 6.5%)                                            |
| Albania     | Adverse effects of medical treatment            | 0 (0 to 0)                         | 0 (0 to 0)                 | 0% (0% to 0%)                                                    |
| Albania     | Conflict and terrorism                          | 0 (0 to 0)                         | 0 (0 to 0)                 | NA                                                               |
| Albania     | Cyclist road injuries                           | 55 (39 to 72)                      | 60 (43 to 79)              | 9.3% (0.8% to 18.9%)                                             |
| Albania     | Drowning                                        | 0 (0 to 0)                         | 0 (0 to 1)                 | 89.2% (66.9% to 115%)                                            |
| Albania     | Environmental heat and cold exposure            | 2 (1 to 2)                         | 2 (1 to 2)                 | 2.9% (-1.2% to 7.4%)                                             |
| Albania     | Executions and police conflict                  | 0 (0 to 0)                         | 0 (0 to 0)                 | NA                                                               |
| Albania     | Exposure to forces of nature                    | 0 (0 to 0)                         | 0 (0 to 0)                 | NA                                                               |
| Albania     | Falls                                           | 130 (97 to 175)                    | 202 (153 to 271)           | 55.6% (49.5% to 61.7%)                                           |
| Albania     | Fire, heat, and hot substances                  | 3 (2 to 6)                         | 3 (2 to 6)                 | 2.6% (-3% to 7.8%)                                               |
| Albania     | Foreign body in eyes                            | 0 (0 to 0)                         | 0 (0 to 0)                 | -0.2% (-1% to 0.5%)                                              |

|    |         |                                                 |                  |                  |                           |
|----|---------|-------------------------------------------------|------------------|------------------|---------------------------|
| 1  |         |                                                 |                  |                  |                           |
| 2  | Albania | Foreign body in other body part                 | 3 (1 to 5)       | 2 (1 to 5)       | -0.9% (-7.1% to 4.6%)     |
| 3  | Albania | Motor vehicle road injuries                     | 78 (61 to 100)   | 84 (64 to 107)   | 7.6% (-1.3% to 16.7%)     |
| 4  | Albania | Motorcyclist road injuries                      | 11 (8 to 14)     | 15 (11 to 21)    | 45.8% (29.2% to 65.2%)    |
| 5  | Albania | Non-venomous animal contact                     | 7 (4 to 13)      | 6 (3 to 10)      | -19.6% (-24.2% to -14.3%) |
| 6  | Albania | Other exposure to mechanical forces             | 258 (164 to 402) | 172 (110 to 267) | -33.2% (-38.5% to -26.5%) |
| 7  | Albania | Other road injuries                             | 1 (1 to 2)       | 2 (1 to 3)       | 6.2% (-3.5% to 17.7%)     |
| 8  | Albania | Other transport injuries                        | 8 (6 to 10)      | 7 (5 to 9)       | -14.5% (-20.5% to -9.7%)  |
| 9  | Albania | Other unintentional injuries                    | 46 (30 to 73)    | 31 (19 to 50)    | -33.6% (-40.5% to -28.1%) |
| 10 | Albania | Pedestrian road injuries                        | 40 (31 to 51)    | 39 (29 to 49)    | -3.7% (-12.2% to 5.4%)    |
| 11 | Albania | Physical violence by firearm                    | 1 (1 to 2)       | 1 (0 to 1)       | -43.4% (-54.1% to -30.4%) |
| 12 | Albania | Physical violence by other means                | 49 (35 to 69)    | 25 (17 to 35)    | -49.4% (-56% to -42.9%)   |
| 13 | Albania | Physical violence by sharp object               | 4 (3 to 7)       | 2 (1 to 3)       | -61% (-69.1% to -52.6%)   |
| 14 | Albania | Poisoning by carbon monoxide                    | 0 (0 to 0)       | 0 (0 to 0)       | 41% (30.2% to 55.6%)      |
| 15 | Albania | Poisoning by other means                        | 1 (0 to 1)       | 1 (0 to 1)       | -2.1% (-8.4% to 4.6%)     |
| 16 | Albania | Pulmonary aspiration and foreign body in airway | 1 (1 to 2)       | 1 (0 to 2)       | -16% (-22.8% to -8.9%)    |
| 17 | Albania | Self-harm by firearm                            | 0 (0 to 0)       | 0 (0 to 1)       | 72.4% (53.6% to 94.8%)    |
| 18 | Albania | Self-harm by other specified means              | 1 (1 to 2)       | 2 (1 to 3)       | 65.8% (54% to 77.6%)      |
| 19 | Albania | Unintentional firearm injuries                  | 2 (1 to 3)       | 1 (0 to 1)       | -58.5% (-65.2% to -51.5%) |
| 20 | Albania | Venomous animal contact                         | 6 (3 to 12)      | 5 (2 to 9)       | -20.6% (-25.5% to -14.7%) |
| 21 | Algeria | Adverse effects of medical treatment            | 0 (0 to 0)       | 0 (0 to 0)       | 0% (0% to 0%)             |
| 22 | Algeria | Conflict and terrorism                          | 0 (0 to 0)       | 0 (0 to 0)       | NA                        |
| 23 | Algeria | Cyclist road injuries                           | 20 (13 to 29)    | 17 (12 to 25)    | -11.7% (-19.8% to -1.4%)  |
| 24 | Algeria | Drowning                                        | 0 (0 to 0)       | 0 (0 to 1)       | 49.8% (26.7% to 76.5%)    |
| 25 | Algeria | Environmental heat and cold exposure            | 3 (2 to 4)       | 3 (2 to 4)       | 2.8% (-1.8% to 7.8%)      |
| 26 | Algeria | Executions and police conflict                  | 0 (0 to 0)       | 0 (0 to 0)       | NA                        |
| 27 | Algeria | Exposure to forces of nature                    | 0 (0 to 0)       | 0 (0 to 0)       | NA                        |
| 28 | Algeria | Falls                                           | 82 (64 to 108)   | 97 (75 to 127)   | 18.1% (13.5% to 23.5%)    |
| 29 | Algeria | Fire, heat, and hot substances                  | 1 (1 to 2)       | 1 (0 to 1)       | -37.3% (-42.3% to -31.8%) |
| 30 | Algeria | Foreign body in eyes                            | 0 (0 to 0)       | 0 (0 to 0)       | 0.2% (0% to 0.6%)         |
| 31 | Algeria | Foreign body in other body part                 | 1 (1 to 3)       | 1 (1 to 3)       | 0.4% (-5.3% to 5.2%)      |
| 32 | Algeria | Motor vehicle road injuries                     | 70 (54 to 88)    | 46 (35 to 58)    | -34.2% (-39.6% to -28.2%) |
| 33 | Algeria | Motorcyclist road injuries                      | 12 (9 to 16)     | 8 (6 to 10)      | -37.4% (-44.1% to -29.3%) |
| 34 | Algeria | Non-venomous animal contact                     | 3 (2 to 5)       | 3 (2 to 6)       | 4.1% (-0.6% to 10.3%)     |
| 35 | Algeria | Other exposure to mechanical forces             | 28 (17 to 44)    | 24 (15 to 39)    | -13.6% (-19.1% to -7.8%)  |
| 36 | Algeria | Other road injuries                             | 2 (1 to 4)       | 2 (1 to 4)       | -2.7% (-12.9% to 10.1%)   |
| 37 | Algeria | Other transport injuries                        | 5 (4 to 7)       | 5 (4 to 7)       | 1.5% (-4.7% to 9.3%)      |
| 38 | Algeria | Other unintentional injuries                    | 19 (12 to 30)    | 16 (10 to 26)    | -17.1% (-23.4% to -11.4%) |
| 39 | Algeria | Pedestrian road injuries                        | 40 (31 to 50)    | 25 (19 to 31)    | -37.8% (-43.1% to -31.8%) |
| 40 | Algeria | Physical violence by firearm                    | 0 (0 to 0)       | 0 (0 to 1)       | 116% (93.2% to 144.1%)    |
| 41 | Algeria | Physical violence by other means                | 12 (8 to 17)     | 10 (7 to 14)     | -16.4% (-22% to -10.4%)   |
| 42 | Algeria | Physical violence by sharp object               | 2 (1 to 3)       | 1 (1 to 2)       | -25.1% (-34.5% to -15.9%) |
| 43 | Algeria | Poisoning by carbon monoxide                    | 0 (0 to 0)       | 0 (0 to 0)       | 15.6% (1.1% to 32.6%)     |
| 44 | Algeria | Poisoning by other means                        | 0 (0 to 0)       | 0 (0 to 0)       | -29.3% (-37.3% to -20.9%) |
| 45 |         |                                                 |                  |                  |                           |
| 46 |         |                                                 |                  |                  |                           |

|    |                |                                                 |                  |                  |                           |
|----|----------------|-------------------------------------------------|------------------|------------------|---------------------------|
| 1  |                |                                                 |                  |                  |                           |
| 2  | Algeria        | Pulmonary aspiration and foreign body in airway | 0 (0 to 1)       | 0 (0 to 1)       | -11.1% (-19.9% to -3.2%)  |
| 3  | Algeria        | Self-harm by firearm                            | 0 (0 to 0)       | 0 (0 to 0)       | 4.5% (-6% to 17.2%)       |
| 4  | Algeria        | Self-harm by other specified means              | 1 (1 to 2)       | 1 (1 to 2)       | -19.7% (-23.9% to -15%)   |
| 5  | Algeria        | Unintentional firearm injuries                  | 2 (1 to 3)       | 2 (1 to 3)       | 4.1% (-4.3% to 13.5%)     |
| 6  | Algeria        | Venomous animal contact                         | 2 (1 to 4)       | 2 (1 to 4)       | 5.7% (-0.4% to 13%)       |
| 7  | American Samoa | Adverse effects of medical treatment            | 0 (0 to 0)       | 0 (0 to 0)       | 0% (0% to 0%)             |
| 8  | American Samoa | Conflict and terrorism                          | 0 (0 to 0)       | 0 (0 to 0)       | NA                        |
| 9  | American Samoa | Cyclist road injuries                           | 7 (4 to 11)      | 7 (4 to 11)      | 4% (-3.3% to 12.2%)       |
| 10 | American Samoa | Drowning                                        | 0 (0 to 0)       | 0 (0 to 0)       | 0.4% (-8.6% to 11.4%)     |
| 11 | American Samoa | Environmental heat and cold exposure            | 1 (0 to 1)       | 0 (0 to 1)       | -20.9% (-27.9% to -14.4%) |
| 12 | American Samoa | Executions and police conflict                  | 0 (0 to 0)       | 0 (0 to 0)       | NA                        |
| 13 | American Samoa | Exposure to forces of nature                    | 0 (0 to 0)       | 0 (0 to 0)       | NA                        |
| 14 | American Samoa | Falls                                           | 32 (20 to 50)    | 40 (25 to 62)    | 24.7% (19.9% to 29.4%)    |
| 15 | American Samoa | Fire, heat, and hot substances                  | 0 (0 to 0)       | 0 (0 to 0)       | 12.1% (5.6% to 18.8%)     |
| 16 | American Samoa | Foreign body in eyes                            | 0 (0 to 0)       | 0 (0 to 0)       | -1.1% (-2.1% to -0.4%)    |
| 17 | American Samoa | Foreign body in other body part                 | 1 (0 to 2)       | 1 (0 to 2)       | -1.7% (-6.3% to 3.4%)     |
| 18 | American Samoa | Motor vehicle road injuries                     | 28 (19 to 38)    | 20 (14 to 29)    | -27.6% (-33.1% to -21.8%) |
| 19 | American Samoa | Motorcyclist road injuries                      | 20 (15 to 28)    | 19 (14 to 26)    | -7.7% (-14.6% to 0.3%)    |
| 20 | American Samoa | Non-venomous animal contact                     | 2 (1 to 4)       | 2 (1 to 4)       | 1.1% (-3.7% to 6.5%)      |
| 21 | American Samoa | Other exposure to mechanical forces             | 28 (14 to 51)    | 20 (10 to 38)    | -28.2% (-34.4% to -22.6%) |
| 22 | American Samoa | Other road injuries                             | 2 (1 to 4)       | 2 (1 to 3)       | -3.5% (-12.5% to 6.3%)    |
| 23 | American Samoa | Other transport injuries                        | 4 (3 to 6)       | 3 (2 to 5)       | -27.8% (-34.5% to -21.8%) |
| 24 | American Samoa | Other unintentional injuries                    | 3 (2 to 6)       | 3 (2 to 5)       | -18.8% (-23.7% to -14%)   |
| 25 | American Samoa | Pedestrian road injuries                        | 15 (10 to 21)    | 13 (9 to 17)     | -15.6% (-22.1% to -8.2%)  |
| 26 | American Samoa | Physical violence by firearm                    | 0 (0 to 0)       | 0 (0 to 0)       | -23.9% (-36.7% to -8.7%)  |
| 27 | American Samoa | Physical violence by other means                | 39 (26 to 57)    | 34 (23 to 51)    | -11.4% (-17% to -5.9%)    |
| 28 | American Samoa | Physical violence by sharp object               | 2 (1 to 4)       | 1 (1 to 3)       | -35.9% (-45.2% to -27.7%) |
| 29 | American Samoa | Poisoning by carbon monoxide                    | 0 (0 to 0)       | 0 (0 to 0)       | 9% (-0.4% to 19%)         |
| 30 | American Samoa | Poisoning by other means                        | 0 (0 to 0)       | 0 (0 to 0)       | -6.6% (-13.4% to 0.5%)    |
| 31 | American Samoa | Pulmonary aspiration and foreign body in airway | 0 (0 to 0)       | 0 (0 to 0)       | 13% (-0.7% to 26.9%)      |
| 32 | American Samoa | Self-harm by firearm                            | 0 (0 to 0)       | 0 (0 to 0)       | 1.2% (-8% to 10.4%)       |
| 33 | American Samoa | Self-harm by other specified means              | 0 (0 to 0)       | 0 (0 to 0)       | 21.1% (12.9% to 31.3%)    |
| 34 | American Samoa | Unintentional firearm injuries                  | 2 (1 to 4)       | 1 (0 to 2)       | -39.3% (-48.8% to -30.7%) |
| 35 | American Samoa | Venomous animal contact                         | 1 (0 to 2)       | 1 (0 to 2)       | -4.3% (-11.9% to 3.3%)    |
| 36 | Andorra        | Adverse effects of medical treatment            | 0 (0 to 0)       | 0 (0 to 0)       | 0% (0% to 0%)             |
| 37 | Andorra        | Conflict and terrorism                          | 0 (0 to 0)       | 0 (0 to 0)       | NA                        |
| 38 | Andorra        | Cyclist road injuries                           | 33 (23 to 44)    | 27 (19 to 37)    | -16.3% (-22.8% to -8.7%)  |
| 39 | Andorra        | Drowning                                        | 0 (0 to 0)       | 0 (0 to 0)       | 65.2% (48.1% to 81.3%)    |
| 40 | Andorra        | Environmental heat and cold exposure            | 2 (1 to 3)       | 2 (1 to 3)       | 0.9% (-2.9% to 4.9%)      |
| 41 | Andorra        | Executions and police conflict                  | 0 (0 to 0)       | 0 (0 to 0)       | NA                        |
| 42 | Andorra        | Exposure to forces of nature                    | 0 (0 to 0)       | 0 (0 to 0)       | NA                        |
| 43 | Andorra        | Falls                                           | 294 (235 to 368) | 318 (250 to 398) | 8% (3.3% to 12.7%)        |
| 44 | Andorra        | Fire, heat, and hot substances                  | 2 (1 to 3)       | 2 (1 to 3)       | 0.6% (-4.1% to 5.3%)      |
| 45 |                |                                                 |                  |                  |                           |
| 46 |                |                                                 |                  |                  |                           |



|    |         |                                                 |                 |               |                           |
|----|---------|-------------------------------------------------|-----------------|---------------|---------------------------|
| 1  |         |                                                 |                 |               |                           |
| 2  | Andorra | Foreign body in eyes                            | 0 (0 to 0)      | 0 (0 to 0)    | -0.9% (-1.7% to -0.4%)    |
| 3  | Andorra | Foreign body in other body part                 | 2 (1 to 3)      | 2 (1 to 3)    | -1% (-5.6% to 4.1%)       |
| 4  | Andorra | Motor vehicle road injuries                     | 41 (32 to 54)   | 31 (23 to 41) | -23.7% (-29.9% to -16.7%) |
| 5  | Andorra | Motorcyclist road injuries                      | 15 (11 to 20)   | 14 (10 to 18) | -7.2% (-16.8% to 3.1%)    |
| 6  | Andorra | Non-venomous animal contact                     | 2 (1 to 3)      | 2 (1 to 3)    | -6.2% (-11.2% to -1.7%)   |
| 7  | Andorra | Other exposure to mechanical forces             | 42 (25 to 67)   | 42 (25 to 69) | 1.3% (-3.6% to 6.4%)      |
| 8  | Andorra | Other road injuries                             | 2 (1 to 3)      | 2 (1 to 3)    | -9.8% (-18.2% to -0.6%)   |
| 9  | Andorra | Other transport injuries                        | 4 (3 to 6)      | 4 (3 to 6)    | 1% (-3.5% to 5.6%)        |
| 10 | Andorra | Other unintentional injuries                    | 22 (14 to 35)   | 21 (13 to 35) | -2.4% (-6.3% to 1.3%)     |
| 11 | Andorra | Pedestrian road injuries                        | 12 (9 to 15)    | 9 (6 to 12)   | -21.7% (-29.5% to -13%)   |
| 12 | Andorra | Physical violence by firearm                    | 1 (0 to 1)      | 1 (0 to 1)    | 33.4% (20.9% to 47.2%)    |
| 13 | Andorra | Physical violence by other means                | 14 (9 to 20)    | 13 (9 to 19)  | -4.4% (-10.8% to 1.9%)    |
| 14 | Andorra | Physical violence by sharp object               | 1 (1 to 2)      | 1 (1 to 2)    | -7.4% (-16.6% to 2.1%)    |
| 15 | Andorra | Poisoning by carbon monoxide                    | 0 (0 to 0)      | 0 (0 to 0)    | 10.4% (3.5% to 18.2%)     |
| 16 | Andorra | Poisoning by other means                        | 0 (0 to 0)      | 0 (0 to 0)    | -4.5% (-9.9% to 1%)       |
| 17 | Andorra | Pulmonary aspiration and foreign body in airway | 1 (1 to 2)      | 1 (0 to 1)    | -11.5% (-19.8% to -3.4%)  |
| 18 | Andorra | Self-harm by firearm                            | 0 (0 to 1)      | 0 (0 to 0)    | -13.1% (-22.8% to -2%)    |
| 19 | Andorra | Self-harm by other specified means              | 3 (2 to 4)      | 2 (1 to 4)    | -15.3% (-19.2% to -11.6%) |
| 20 | Andorra | Unintentional firearm injuries                  | 1 (0 to 2)      | 1 (0 to 2)    | 5.6% (-2.9% to 14.1%)     |
| 21 | Andorra | Venomous animal contact                         | 1 (0 to 2)      | 1 (0 to 2)    | -7.6% (-13.5% to -1.8%)   |
| 22 | Angola  | Adverse effects of medical treatment            | 0 (0 to 0)      | 0 (0 to 0)    | 0% (0% to 0%)             |
| 23 | Angola  | Conflict and terrorism                          | 163 (66 to 372) | 0 (0 to 1)    | NA                        |
| 24 | Angola  | Cyclist road injuries                           | 17 (11 to 24)   | 21 (14 to 30) | 24.7% (14% to 36%)        |
| 25 | Angola  | Drowning                                        | 0 (0 to 0)      | 0 (0 to 0)    | -28.5% (-36.5% to -20.8%) |
| 26 | Angola  | Environmental heat and cold exposure            | 2 (2 to 3)      | 2 (1 to 3)    | -9.3% (-17.1% to -2.4%)   |
| 27 | Angola  | Executions and police conflict                  | 0 (0 to 0)      | 0 (0 to 0)    | NA                        |
| 28 | Angola  | Exposure to forces of nature                    | 0 (0 to 0)      | 0 (0 to 0)    | NA                        |
| 29 | Angola  | Falls                                           | 38 (30 to 48)   | 47 (36 to 59) | 23.9% (19.5% to 28.2%)    |
| 30 | Angola  | Fire, heat, and hot substances                  | 1 (1 to 2)      | 1 (1 to 1)    | -21.8% (-28.7% to -15.6%) |
| 31 | Angola  | Foreign body in eyes                            | 0 (0 to 0)      | 0 (0 to 0)    | -2.2% (-3.8% to -1.1%)    |
| 32 | Angola  | Foreign body in other body part                 | 4 (2 to 7)      | 3 (1 to 6)    | -17.1% (-23.2% to -11.7%) |
| 33 | Angola  | Motor vehicle road injuries                     | 44 (33 to 57)   | 47 (36 to 59) | 6.5% (-1.9% to 15.3%)     |
| 34 | Angola  | Motorcyclist road injuries                      | 10 (8 to 14)    | 11 (8 to 14)  | 4.8% (-6.4% to 16.5%)     |
| 35 | Angola  | Non-venomous animal contact                     | 8 (5 to 14)     | 6 (3 to 10)   | -33% (-38.6% to -27.4%)   |
| 36 | Angola  | Other exposure to mechanical forces             | 17 (11 to 28)   | 14 (9 to 24)  | -16.2% (-22.7% to -9.3%)  |
| 37 | Angola  | Other road injuries                             | 1 (1 to 2)      | 1 (1 to 2)    | 17.7% (6% to 31.2%)       |
| 38 | Angola  | Other transport injuries                        | 6 (5 to 8)      | 5 (4 to 6)    | -18.1% (-25.5% to -10.7%) |
| 39 | Angola  | Other unintentional injuries                    | 8 (6 to 13)     | 7 (4 to 11)   | -20.2% (-26.6% to -13.2%) |
| 40 | Angola  | Pedestrian road injuries                        | 49 (37 to 61)   | 42 (32 to 52) | -15.2% (-21.7% to -9.1%)  |
| 41 | Angola  | Physical violence by firearm                    | 0 (0 to 0)      | 0 (0 to 0)    | 21.1% (8.2% to 35.1%)     |
| 42 | Angola  | Physical violence by other means                | 5 (4 to 8)      | 5 (3 to 7)    | -7.4% (-13.2% to -1.5%)   |
| 43 | Angola  | Physical violence by sharp object               | 2 (1 to 3)      | 2 (1 to 3)    | -9.4% (-16.9% to -1.7%)   |
| 44 | Angola  | Poisoning by carbon monoxide                    | 0 (0 to 0)      | 0 (0 to 0)    | 3.1% (-9.2% to 17.6%)     |
| 45 |         |                                                 |                 |               |                           |
| 46 |         |                                                 |                 |               |                           |

|    |                     |                                                 |                 |                 |                           |
|----|---------------------|-------------------------------------------------|-----------------|-----------------|---------------------------|
| 1  |                     |                                                 |                 |                 |                           |
| 2  | Angola              | Poisoning by other means                        | 0 (0 to 0)      | 0 (0 to 0)      | -32.9% (-40% to -24.6%)   |
| 3  | Angola              | Pulmonary aspiration and foreign body in airway | 0 (0 to 1)      | 0 (0 to 1)      | -39.4% (-47.4% to -30.3%) |
| 4  | Angola              | Self-harm by firearm                            | 0 (0 to 0)      | 0 (0 to 0)      | 16.9% (3.1% to 32.4%)     |
| 5  | Angola              | Self-harm by other specified means              | 1 (1 to 2)      | 1 (1 to 2)      | -5.5% (-10.4% to -0.3%)   |
| 6  | Angola              | Unintentional firearm injuries                  | 2 (1 to 3)      | 1 (1 to 2)      | -24.2% (-32.5% to -15.4%) |
| 7  | Angola              | Venomous animal contact                         | 1 (0 to 4)      | 1 (0 to 3)      | -18% (-27.1% to -7.7%)    |
| 8  | Antigua and Barbuda | Adverse effects of medical treatment            | 0 (0 to 0)      | 0 (0 to 0)      | 0% (0% to 0%)             |
| 9  | Antigua and Barbuda | Conflict and terrorism                          | 0 (0 to 0)      | 0 (0 to 0)      | NA                        |
| 10 | Antigua and Barbuda | Cyclist road injuries                           | 27 (20 to 37)   | 25 (18 to 34)   | -8.5% (-16.8% to 0.1%)    |
| 11 | Antigua and Barbuda | Drowning                                        | 0 (0 to 1)      | 0 (0 to 1)      | 16.9% (4.6% to 28.3%)     |
| 12 | Antigua and Barbuda | Environmental heat and cold exposure            | 13 (9 to 18)    | 14 (10 to 20)   | 7.6% (2.8% to 12%)        |
| 13 | Antigua and Barbuda | Executions and police conflict                  | 0 (0 to 0)      | 0 (0 to 0)      | NA                        |
| 14 | Antigua and Barbuda | Exposure to forces of nature                    | 0 (0 to 0)      | 0 (0 to 0)      | NA                        |
| 15 | Antigua and Barbuda | Falls                                           | 42 (33 to 55)   | 64 (50 to 83)   | 51.3% (45.4% to 57.4%)    |
| 16 | Antigua and Barbuda | Fire, heat, and hot substances                  | 5 (3 to 8)      | 4 (2 to 7)      | -18.3% (-23.6% to -12.7%) |
| 17 | Antigua and Barbuda | Foreign body in eyes                            | 0 (0 to 0)      | 0 (0 to 0)      | 1% (0.4% to 1.9%)         |
| 18 | Antigua and Barbuda | Foreign body in other body part                 | 1 (1 to 3)      | 1 (1 to 3)      | -0.9% (-6.8% to 5.2%)     |
| 19 | Antigua and Barbuda | Motor vehicle road injuries                     | 28 (21 to 36)   | 21 (15 to 27)   | -25.8% (-32.7% to -18.1%) |
| 20 | Antigua and Barbuda | Motorcyclist road injuries                      | 13 (9 to 17)    | 13 (10 to 18)   | 5.6% (-6.2% to 19.1%)     |
| 21 | Antigua and Barbuda | Non-venomous animal contact                     | 3 (1 to 5)      | 3 (1 to 5)      | -1.2% (-6.8% to 5.9%)     |
| 22 | Antigua and Barbuda | Other exposure to mechanical forces             | 68 (41 to 111)  | 76 (46 to 125)  | 11.7% (3.7% to 20.1%)     |
| 23 | Antigua and Barbuda | Other road injuries                             | 4 (2 to 6)      | 3 (2 to 6)      | -3.7% (-13% to 6.6%)      |
| 24 | Antigua and Barbuda | Other transport injuries                        | 4 (3 to 6)      | 4 (3 to 6)      | 2.3% (-3.5% to 8.5%)      |
| 25 | Antigua and Barbuda | Other unintentional injuries                    | 18 (11 to 29)   | 15 (10 to 24)   | -14.3% (-19.6% to -9.7%)  |
| 26 | Antigua and Barbuda | Pedestrian road injuries                        | 12 (9 to 16)    | 10 (7 to 14)    | -14.1% (-22.3% to -5.5%)  |
| 27 | Antigua and Barbuda | Physical violence by firearm                    | 1 (0 to 1)      | 1 (1 to 1)      | 86.3% (62.4% to 118.2%)   |
| 28 | Antigua and Barbuda | Physical violence by other means                | 11 (8 to 15)    | 11 (8 to 16)    | 4.7% (-3.6% to 13.7%)     |
| 29 | Antigua and Barbuda | Physical violence by sharp object               | 3 (2 to 4)      | 3 (2 to 5)      | 9.3% (-1.1% to 21.6%)     |
| 30 | Antigua and Barbuda | Poisoning by carbon monoxide                    | 0 (0 to 0)      | 0 (0 to 0)      | 6.5% (-5.9% to 20.1%)     |
| 31 | Antigua and Barbuda | Poisoning by other means                        | 0 (0 to 0)      | 0 (0 to 0)      | -17.6% (-27.1% to -8.1%)  |
| 32 | Antigua and Barbuda | Pulmonary aspiration and foreign body in airway | 0 (0 to 1)      | 0 (0 to 1)      | -19.2% (-26% to -11.8%)   |
| 33 | Antigua and Barbuda | Self-harm by firearm                            | 0 (0 to 0)      | 0 (0 to 0)      | 36.2% (20.7% to 54.9%)    |
| 34 | Antigua and Barbuda | Self-harm by other specified means              | 0 (0 to 0)      | 0 (0 to 1)      | 23.4% (14.1% to 34.5%)    |
| 35 | Antigua and Barbuda | Unintentional firearm injuries                  | 10 (7 to 15)    | 12 (7 to 18)    | 14.1% (1.4% to 29.5%)     |
| 36 | Antigua and Barbuda | Venomous animal contact                         | 4 (2 to 8)      | 4 (2 to 8)      | -1.5% (-6.8% to 4.6%)     |
| 37 | Argentina           | Adverse effects of medical treatment            | 0 (0 to 0)      | 0 (0 to 0)      | 0% (0% to 0%)             |
| 38 | Argentina           | Conflict and terrorism                          | 3 (1 to 6)      | 0 (0 to 0)      | NA                        |
| 39 | Argentina           | Cyclist road injuries                           | 25 (18 to 33)   | 24 (17 to 33)   | -1.7% (-11.4% to 10.1%)   |
| 40 | Argentina           | Drowning                                        | 0 (0 to 0)      | 0 (0 to 0)      | 23.5% (7.5% to 38.4%)     |
| 41 | Argentina           | Environmental heat and cold exposure            | 2 (1 to 2)      | 2 (1 to 2)      | 1.4% (-4% to 7.8%)        |
| 42 | Argentina           | Executions and police conflict                  | 0 (0 to 0)      | 0 (0 to 0)      | NA                        |
| 43 | Argentina           | Exposure to forces of nature                    | 0 (0 to 0)      | 0 (0 to 0)      | NA                        |
| 44 | Argentina           | Falls                                           | 124 (95 to 162) | 129 (97 to 171) | 3.9% (-1.5% to 8.8%)      |
| 45 |                     |                                                 |                 |                 |                           |
| 46 |                     |                                                 |                 |                 |                           |

|    |           |                                                 |                  |                 |                           |
|----|-----------|-------------------------------------------------|------------------|-----------------|---------------------------|
| 1  |           |                                                 |                  |                 |                           |
| 2  | Argentina | Fire, heat, and hot substances                  | 4 (2 to 6)       | 4 (2 to 6)      | -2% (-8.1% to 4.2%)       |
| 3  | Argentina | Foreign body in eyes                            | 0 (0 to 0)       | 0 (0 to 0)      | 0% (0% to 0.1%)           |
| 4  | Argentina | Foreign body in other body part                 | 3 (1 to 5)       | 2 (1 to 5)      | -7.5% (-12.4% to -2.2%)   |
| 5  | Argentina | Motor vehicle road injuries                     | 36 (28 to 45)    | 42 (33 to 53)   | 17.2% (6.6% to 31.4%)     |
| 6  | Argentina | Motorcyclist road injuries                      | 6 (4 to 8)       | 12 (9 to 16)    | 99.1% (69.9% to 141.2%)   |
| 7  | Argentina | Non-venomous animal contact                     | 6 (3 to 10)      | 5 (3 to 8)      | -17.8% (-21.6% to -14.1%) |
| 8  | Argentina | Other exposure to mechanical forces             | 88 (54 to 138)   | 86 (53 to 135)  | -1.7% (-8.2% to 5.2%)     |
| 9  | Argentina | Other road injuries                             | 1 (1 to 2)       | 1 (1 to 2)      | 1% (-9% to 12%)           |
| 10 | Argentina | Other transport injuries                        | 5 (4 to 6)       | 4 (3 to 5)      | -25.5% (-31.5% to -19.3%) |
| 11 | Argentina | Other unintentional injuries                    | 39 (25 to 61)    | 34 (22 to 54)   | -13% (-18.3% to -6.6%)    |
| 12 | Argentina | Pedestrian road injuries                        | 11 (8 to 14)     | 9 (7 to 13)     | -14.8% (-23.2% to -5.3%)  |
| 13 | Argentina | Physical violence by firearm                    | 1 (1 to 1)       | 2 (1 to 3)      | 74.8% (49.4% to 106.4%)   |
| 14 | Argentina | Physical violence by other means                | 32 (23 to 45)    | 36 (25 to 51)   | 11.3% (-1.2% to 24.6%)    |
| 15 | Argentina | Physical violence by sharp object               | 6 (4 to 9)       | 7 (4 to 10)     | 14.4% (-2.1% to 33.9%)    |
| 16 | Argentina | Poisoning by carbon monoxide                    | 0 (0 to 0)       | 0 (0 to 0)      | 41.4% (28.1% to 57.7%)    |
| 17 | Argentina | Poisoning by other means                        | 0 (0 to 1)       | 0 (0 to 1)      | -6.2% (-13.7% to 2%)      |
| 18 | Argentina | Pulmonary aspiration and foreign body in airway | 1 (0 to 1)       | 0 (0 to 1)      | -43.4% (-50.6% to -36%)   |
| 19 | Argentina | Self-harm by firearm                            | 1 (0 to 1)       | 1 (0 to 1)      | 15.9% (-0.7% to 33%)      |
| 20 | Argentina | Self-harm by other specified means              | 1 (1 to 2)       | 2 (2 to 4)      | 68.4% (56% to 81.9%)      |
| 21 | Argentina | Unintentional firearm injuries                  | 7 (4 to 11)      | 4 (3 to 7)      | -38.3% (-47% to -29.8%)   |
| 22 | Argentina | Venomous animal contact                         | 4 (2 to 7)       | 3 (1 to 6)      | -18.2% (-22.4% to -13.7%) |
| 23 | Armenia   | Adverse effects of medical treatment            | 0 (0 to 0)       | 0 (0 to 0)      | 0% (0% to 0%)             |
| 24 | Armenia   | Conflict and terrorism                          | 4 (2 to 10)      | 0 (0 to 0)      | NA                        |
| 25 | Armenia   | Cyclist road injuries                           | 24 (16 to 33)    | 20 (14 to 27)   | -17% (-25.4% to -7.4%)    |
| 26 | Armenia   | Drowning                                        | 1 (0 to 1)       | 1 (0 to 1)      | 5.1% (-9.6% to 19.6%)     |
| 27 | Armenia   | Environmental heat and cold exposure            | 5 (3 to 7)       | 5 (3 to 6)      | 0.1% (-7.4% to 9.6%)      |
| 28 | Armenia   | Executions and police conflict                  | 0 (0 to 0)       | 0 (0 to 0)      | NA                        |
| 29 | Armenia   | Exposure to forces of nature                    | 0 (0 to 0)       | 0 (0 to 0)      | NA                        |
| 30 | Armenia   | Falls                                           | 182 (142 to 235) | 118 (88 to 158) | -35.1% (-41.2% to -28.4%) |
| 31 | Armenia   | Fire, heat, and hot substances                  | 6 (4 to 10)      | 4 (2 to 6)      | -37% (-47.3% to -27.4%)   |
| 32 | Armenia   | Foreign body in eyes                            | 0 (0 to 0)       | 0 (0 to 0)      | 0.8% (0.4% to 1.4%)       |
| 33 | Armenia   | Foreign body in other body part                 | 2 (1 to 5)       | 2 (1 to 4)      | -14.9% (-20% to -9.9%)    |
| 34 | Armenia   | Motor vehicle road injuries                     | 57 (44 to 71)    | 47 (36 to 60)   | -16.4% (-25.4% to -6.5%)  |
| 35 | Armenia   | Motorcyclist road injuries                      | 10 (7 to 13)     | 6 (4 to 8)      | -41.3% (-51.2% to -30.8%) |
| 36 | Armenia   | Non-venomous animal contact                     | 3 (1 to 5)       | 3 (1 to 5)      | -3.3% (-9.4% to 3.1%)     |
| 37 | Armenia   | Other exposure to mechanical forces             | 81 (51 to 126)   | 58 (36 to 92)   | -28.3% (-36.3% to -20.6%) |
| 38 | Armenia   | Other road injuries                             | 3 (1 to 4)       | 2 (1 to 3)      | -21.5% (-30.9% to -11.2%) |
| 39 | Armenia   | Other transport injuries                        | 4 (3 to 6)       | 5 (3 to 7)      | 9% (4.4% to 14.3%)        |
| 40 | Armenia   | Other unintentional injuries                    | 35 (23 to 56)    | 25 (16 to 40)   | -30.7% (-37% to -23.1%)   |
| 41 | Armenia   | Pedestrian road injuries                        | 29 (22 to 36)    | 19 (14 to 25)   | -32.8% (-39.7% to -24.7%) |
| 42 | Armenia   | Physical violence by firearm                    | 0 (0 to 0)       | 0 (0 to 0)      | 50% (28.9% to 74.1%)      |
| 43 | Armenia   | Physical violence by other means                | 23 (16 to 31)    | 19 (13 to 26)   | -17.4% (-26.4% to -6.9%)  |
| 44 | Armenia   | Physical violence by sharp object               | 2 (2 to 4)       | 2 (1 to 4)      | -12.5% (-26.4% to 1.1%)   |
| 45 |           |                                                 |                  |                 |                           |
| 46 |           |                                                 |                  |                 |                           |

|    |           |                                                 |                  |                  |                           |
|----|-----------|-------------------------------------------------|------------------|------------------|---------------------------|
| 1  |           |                                                 |                  |                  |                           |
| 2  | Armenia   | Poisoning by carbon monoxide                    | 0 (0 to 0)       | 0 (0 to 0)       | -11.8% (-26.8% to 3.3%)   |
| 3  | Armenia   | Poisoning by other means                        | 0 (0 to 1)       | 0 (0 to 1)       | -17% (-27.7% to -6.9%)    |
| 4  | Armenia   | Pulmonary aspiration and foreign body in airway | 2 (1 to 3)       | 1 (1 to 2)       | -33.1% (-41% to -26.4%)   |
| 5  | Armenia   | Self-harm by firearm                            | 0 (0 to 0)       | 0 (0 to 0)       | 128.4% (99.4% to 160.5%)  |
| 6  | Armenia   | Self-harm by other specified means              | 1 (1 to 1)       | 2 (1 to 3)       | 98.7% (84.4% to 115.3%)   |
| 7  | Armenia   | Unintentional firearm injuries                  | 2 (1 to 3)       | 1 (1 to 2)       | -49.3% (-57.3% to -39.5%) |
| 8  | Armenia   | Venomous animal contact                         | 3 (1 to 6)       | 3 (1 to 5)       | -15.9% (-21.6% to -10.8%) |
| 9  | Australia | Adverse effects of medical treatment            | 0 (0 to 0)       | 0 (0 to 0)       | 0% (0% to 0%)             |
| 10 | Australia | Conflict and terrorism                          | 0 (0 to 0)       | 0 (0 to 0)       | NA                        |
| 11 | Australia | Cyclist road injuries                           | 10 (6 to 14)     | 8 (5 to 11)      | -18.9% (-30.1% to -5.9%)  |
| 12 | Australia | Drowning                                        | 0 (0 to 0)       | 0 (0 to 0)       | 35.9% (22.9% to 51.8%)    |
| 13 | Australia | Environmental heat and cold exposure            | 3 (2 to 4)       | 2 (2 to 3)       | -15.2% (-21.3% to -10.3%) |
| 14 | Australia | Executions and police conflict                  | 0 (0 to 0)       | 0 (0 to 0)       | NA                        |
| 15 | Australia | Exposure to forces of nature                    | 0 (0 to 0)       | 0 (0 to 0)       | NA                        |
| 16 | Australia | Falls                                           | 259 (198 to 346) | 338 (262 to 442) | 30.4% (24.4% to 37.1%)    |
| 17 | Australia | Fire, heat, and hot substances                  | 3 (2 to 6)       | 3 (2 to 6)       | -4.5% (-10.2% to 1.1%)    |
| 18 | Australia | Foreign body in eyes                            | 0 (0 to 0)       | 0 (0 to 0)       | 0.2% (-0.1% to 0.7%)      |
| 19 | Australia | Foreign body in other body part                 | 5 (3 to 11)      | 5 (3 to 11)      | 0.8% (-4.1% to 6.9%)      |
| 20 | Australia | Motor vehicle road injuries                     | 51 (40 to 64)    | 32 (25 to 40)    | -37.7% (-45.2% to -29.7%) |
| 21 | Australia | Motorcyclist road injuries                      | 14 (10 to 18)    | 12 (9 to 15)     | -15.6% (-31.1% to 0.7%)   |
| 22 | Australia | Non-venomous animal contact                     | 13 (7 to 23)     | 12 (6 to 20)     | -13% (-16.8% to -8.8%)    |
| 23 | Australia | Other exposure to mechanical forces             | 191 (117 to 304) | 177 (106 to 286) | -7.1% (-14.5% to -0.9%)   |
| 24 | Australia | Other road injuries                             | 1 (0 to 1)       | 1 (0 to 1)       | -4.4% (-16.4% to 9.5%)    |
| 25 | Australia | Other transport injuries                        | 7 (5 to 9)       | 6 (4 to 8)       | -14.1% (-20.6% to -7.6%)  |
| 26 | Australia | Other unintentional injuries                    | 61 (39 to 96)    | 54 (35 to 86)    | -11.4% (-17.3% to -6.6%)  |
| 27 | Australia | Pedestrian road injuries                        | 13 (10 to 16)    | 8 (6 to 11)      | -34.9% (-43.9% to -24.7%) |
| 28 | Australia | Physical violence by firearm                    | 1 (0 to 1)       | 1 (0 to 1)       | 27.2% (14.9% to 42.9%)    |
| 29 | Australia | Physical violence by other means                | 45 (32 to 64)    | 42 (29 to 59)    | -7.3% (-14.3% to 0.1%)    |
| 30 | Australia | Physical violence by sharp object               | 3 (2 to 5)       | 3 (1 to 4)       | -18.5% (-27.2% to -9.3%)  |
| 31 | Australia | Poisoning by carbon monoxide                    | 0 (0 to 0)       | 0 (0 to 0)       | 7.1% (-1.6% to 15.1%)     |
| 32 | Australia | Poisoning by other means                        | 0 (0 to 0)       | 0 (0 to 0)       | -2.1% (-9.1% to 3.9%)     |
| 33 | Australia | Pulmonary aspiration and foreign body in airway | 1 (1 to 2)       | 1 (1 to 2)       | -8.4% (-12.8% to -3.3%)   |
| 34 | Australia | Self-harm by firearm                            | 0 (0 to 1)       | 0 (0 to 0)       | -52.3% (-61.9% to -41.3%) |
| 35 | Australia | Self-harm by other specified means              | 4 (2 to 6)       | 4 (2 to 6)       | 0.1% (-5.7% to 6.4%)      |
| 36 | Australia | Unintentional firearm injuries                  | 1 (1 to 2)       | 1 (0 to 2)       | -9.3% (-20.3% to 2.8%)    |
| 37 | Australia | Venomous animal contact                         | 3 (1 to 7)       | 3 (1 to 6)       | -15.3% (-20.2% to -10.2%) |
| 38 | Austria   | Adverse effects of medical treatment            | 0 (0 to 0)       | 0 (0 to 0)       | 0% (0% to 0%)             |
| 39 | Austria   | Conflict and terrorism                          | 0 (0 to 0)       | 0 (0 to 0)       | NA                        |
| 40 | Austria   | Cyclist road injuries                           | 26 (19 to 35)    | 19 (13 to 25)    | -29.7% (-39.1% to -18.8%) |
| 41 | Austria   | Drowning                                        | 0 (0 to 0)       | 0 (0 to 0)       | 38.9% (21.9% to 54.8%)    |
| 42 | Austria   | Environmental heat and cold exposure            | 2 (1 to 3)       | 2 (1 to 3)       | 3.5% (-1.9% to 9.3%)      |
| 43 | Austria   | Executions and police conflict                  | 0 (0 to 0)       | 0 (0 to 0)       | NA                        |
| 44 | Austria   | Exposure to forces of nature                    | 0 (0 to 0)       | 0 (0 to 0)       | NA                        |
| 45 |           |                                                 |                  |                  |                           |
| 46 |           |                                                 |                  |                  |                           |

|    |            |                                                 |                  |                  |                           |
|----|------------|-------------------------------------------------|------------------|------------------|---------------------------|
| 1  |            |                                                 |                  |                  |                           |
| 2  | Austria    | Falls                                           | 312 (247 to 397) | 300 (236 to 379) | -3.8% (-8.6% to 1%)       |
| 3  | Austria    | Fire, heat, and hot substances                  | 2 (1 to 4)       | 2 (1 to 4)       | -4.2% (-9.3% to 1.6%)     |
| 4  | Austria    | Foreign body in eyes                            | 0 (0 to 0)       | 0 (0 to 0)       | 0.9% (0.2% to 1.9%)       |
| 5  | Austria    | Foreign body in other body part                 | 2 (1 to 3)       | 2 (1 to 3)       | 1.6% (-2.6% to 6.7%)      |
| 6  | Austria    | Motor vehicle road injuries                     | 44 (34 to 57)    | 19 (14 to 25)    | -56.4% (-63.2% to -48.7%) |
| 7  | Austria    | Motorcyclist road injuries                      | 14 (10 to 18)    | 10 (7 to 13)     | -30% (-42.5% to -15.6%)   |
| 8  | Austria    | Non-venomous animal contact                     | 2 (1 to 4)       | 2 (1 to 4)       | -12.9% (-17.8% to -7.3%)  |
| 9  | Austria    | Other exposure to mechanical forces             | 66 (42 to 104)   | 46 (28 to 74)    | -30.2% (-38.2% to -23%)   |
| 10 | Austria    | Other road injuries                             | 1 (1 to 2)       | 1 (1 to 2)       | -17.3% (-29.2% to -3.7%)  |
| 11 | Austria    | Other transport injuries                        | 5 (4 to 7)       | 5 (4 to 7)       | -7% (-12.6% to -0.7%)     |
| 12 | Austria    | Other unintentional injuries                    | 23 (14 to 36)    | 22 (14 to 35)    | -4.2% (-9.9% to 0.6%)     |
| 13 | Austria    | Pedestrian road injuries                        | 12 (10 to 16)    | 6 (4 to 8)       | -50.7% (-58.1% to -41.7%) |
| 14 | Austria    | Physical violence by firearm                    | 0 (0 to 1)       | 1 (0 to 1)       | 36.2% (23.6% to 49.8%)    |
| 15 | Austria    | Physical violence by other means                | 14 (10 to 20)    | 14 (10 to 21)    | 1.5% (-4.8% to 7.2%)      |
| 16 | Austria    | Physical violence by sharp object               | 2 (1 to 3)       | 1 (1 to 2)       | -17.4% (-25.4% to -9%)    |
| 17 | Austria    | Poisoning by carbon monoxide                    | 0 (0 to 0)       | 0 (0 to 0)       | 14.4% (6.2% to 23.5%)     |
| 18 | Austria    | Poisoning by other means                        | 0 (0 to 0)       | 0 (0 to 0)       | -3.8% (-9.3% to 1.9%)     |
| 19 | Austria    | Pulmonary aspiration and foreign body in airway | 1 (1 to 2)       | 1 (0 to 1)       | -7.3% (-15.5% to 1.7%)    |
| 20 | Austria    | Self-harm by firearm                            | 1 (0 to 1)       | 1 (0 to 1)       | -35.2% (-44.2% to -25.3%) |
| 21 | Austria    | Self-harm by other specified means              | 4 (3 to 7)       | 3 (2 to 5)       | -32.4% (-36.3% to -28%)   |
| 22 | Austria    | Unintentional firearm injuries                  | 1 (1 to 2)       | 1 (1 to 2)       | 5.8% (-5.7% to 17.4%)     |
| 23 | Austria    | Venomous animal contact                         | 1 (0 to 2)       | 1 (0 to 2)       | -12.5% (-17.8% to -6.2%)  |
| 24 | Azerbaijan | Adverse effects of medical treatment            | 0 (0 to 0)       | 0 (0 to 0)       | 0% (0% to 0%)             |
| 25 | Azerbaijan | Conflict and terrorism                          | 2 (1 to 6)       | 0 (0 to 0)       | NA                        |
| 26 | Azerbaijan | Cyclist road injuries                           | 20 (14 to 28)    | 18 (12 to 26)    | -9.7% (-19% to 0.7%)      |
| 27 | Azerbaijan | Drowning                                        | 1 (0 to 1)       | 1 (0 to 1)       | 17.5% (3.9% to 34%)       |
| 28 | Azerbaijan | Environmental heat and cold exposure            | 5 (3 to 7)       | 4 (3 to 6)       | -8.3% (-14.1% to -1.7%)   |
| 29 | Azerbaijan | Executions and police conflict                  | 0 (0 to 0)       | 0 (0 to 0)       | NA                        |
| 30 | Azerbaijan | Exposure to forces of nature                    | 0 (0 to 0)       | 0 (0 to 0)       | NA                        |
| 31 | Azerbaijan | Falls                                           | 106 (80 to 142)  | 113 (85 to 153)  | 7% (0.8% to 13.1%)        |
| 32 | Azerbaijan | Fire, heat, and hot substances                  | 6 (4 to 10)      | 5 (3 to 8)       | -21.7% (-27.9% to -15.1%) |
| 33 | Azerbaijan | Foreign body in eyes                            | 0 (0 to 0)       | 0 (0 to 0)       | 2.5% (1.6% to 3.7%)       |
| 34 | Azerbaijan | Foreign body in other body part                 | 2 (1 to 4)       | 2 (1 to 4)       | 1.2% (-4.6% to 7.7%)      |
| 35 | Azerbaijan | Motor vehicle road injuries                     | 60 (47 to 77)    | 46 (35 to 58)    | -24.7% (-32.7% to -16.5%) |
| 36 | Azerbaijan | Motorcyclist road injuries                      | 6 (4 to 8)       | 3 (2 to 4)       | -46.5% (-54% to -38%)     |
| 37 | Azerbaijan | Non-venomous animal contact                     | 2 (1 to 4)       | 2 (1 to 4)       | -10% (-14.8% to -4.3%)    |
| 38 | Azerbaijan | Other exposure to mechanical forces             | 55 (34 to 87)    | 55 (34 to 86)    | -0.6% (-6.6% to 6.2%)     |
| 39 | Azerbaijan | Other road injuries                             | 2 (1 to 3)       | 2 (1 to 3)       | -1.3% (-12.4% to 11%)     |
| 40 | Azerbaijan | Other transport injuries                        | 4 (3 to 6)       | 5 (4 to 7)       | 13.5% (7.8% to 20.2%)     |
| 41 | Azerbaijan | Other unintentional injuries                    | 20 (13 to 33)    | 21 (13 to 33)    | 1.7% (-3.9% to 6.8%)      |
| 42 | Azerbaijan | Pedestrian road injuries                        | 27 (20 to 35)    | 21 (16 to 27)    | -19.8% (-28.2% to -10.6%) |
| 43 | Azerbaijan | Physical violence by firearm                    | 0 (0 to 0)       | 0 (0 to 0)       | -18.1% (-36.7% to 3.6%)   |
| 44 | Azerbaijan | Physical violence by other means                | 38 (27 to 53)    | 17 (12 to 24)    | -55.7% (-61.8% to -48.3%) |
| 45 |            |                                                 |                  |                  |                           |
| 46 |            |                                                 |                  |                  |                           |

|    |            |                                                 |               |               |                           |
|----|------------|-------------------------------------------------|---------------|---------------|---------------------------|
| 1  |            |                                                 |               |               |                           |
| 2  | Azerbaijan | Physical violence by sharp object               | 3 (2 to 5)    | 2 (1 to 3)    | -49.7% (-58.5% to -39.3%) |
| 3  | Azerbaijan | Poisoning by carbon monoxide                    | 0 (0 to 0)    | 0 (0 to 0)    | 16.7% (3.4% to 30.5%)     |
| 4  | Azerbaijan | Poisoning by other means                        | 0 (0 to 1)    | 0 (0 to 1)    | -8.8% (-18.3% to -0.2%)   |
| 5  | Azerbaijan | Pulmonary aspiration and foreign body in airway | 1 (1 to 2)    | 1 (1 to 2)    | -12.4% (-19.5% to -4.9%)  |
| 6  | Azerbaijan | Self-harm by firearm                            | 0 (0 to 0)    | 0 (0 to 0)    | 34.2% (19.2% to 51.4%)    |
| 7  | Azerbaijan | Self-harm by other specified means              | 1 (1 to 1)    | 1 (1 to 2)    | 27.3% (20% to 35.3%)      |
| 8  | Azerbaijan | Unintentional firearm injuries                  | 1 (1 to 2)    | 1 (1 to 2)    | 1.9% (-6.7% to 11.2%)     |
| 9  | Azerbaijan | Venomous animal contact                         | 3 (1 to 5)    | 2 (1 to 4)    | -9.6% (-14.2% to -4.3%)   |
| 10 | Bahamas    | Adverse effects of medical treatment            | 0 (0 to 0)    | 0 (0 to 0)    | 0% (0% to 0%)             |
| 11 | Bahamas    | Conflict and terrorism                          | 0 (0 to 0)    | 0 (0 to 0)    | NA                        |
| 12 | Bahamas    | Cyclist road injuries                           | 34 (24 to 45) | 26 (18 to 35) | -23.4% (-31.8% to -14.3%) |
| 13 | Bahamas    | Drowning                                        | 0 (0 to 1)    | 0 (0 to 1)    | 13.6% (2.7% to 24.9%)     |
| 14 | Bahamas    | Environmental heat and cold exposure            | 11 (8 to 15)  | 11 (8 to 15)  | 1.1% (-3.7% to 5.4%)      |
| 15 | Bahamas    | Executions and police conflict                  | 0 (0 to 0)    | 0 (0 to 0)    | NA                        |
| 16 | Bahamas    | Exposure to forces of nature                    | 0 (0 to 0)    | 0 (0 to 0)    | NA                        |
| 17 | Bahamas    | Falls                                           | 51 (40 to 65) | 70 (55 to 90) | 38.9% (33.4% to 44.7%)    |
| 18 | Bahamas    | Fire, heat, and hot substances                  | 5 (3 to 9)    | 5 (3 to 8)    | -16.1% (-21.6% to -9.9%)  |
| 19 | Bahamas    | Foreign body in eyes                            | 0 (0 to 0)    | 0 (0 to 0)    | 0.3% (0% to 0.7%)         |
| 20 | Bahamas    | Foreign body in other body part                 | 1 (1 to 3)    | 1 (1 to 3)    | -4.2% (-10% to 2.3%)      |
| 21 | Bahamas    | Motor vehicle road injuries                     | 45 (34 to 58) | 34 (25 to 43) | -25.5% (-33.6% to -16.4%) |
| 22 | Bahamas    | Motorcyclist road injuries                      | 22 (17 to 29) | 25 (19 to 31) | 13.4% (-0.3% to 29.2%)    |
| 23 | Bahamas    | Non-venomous animal contact                     | 2 (1 to 4)    | 2 (1 to 4)    | 1.1% (-4.8% to 7.8%)      |
| 24 | Bahamas    | Other exposure to mechanical forces             | 28 (16 to 46) | 33 (19 to 55) | 17.8% (12% to 24.3%)      |
| 25 | Bahamas    | Other road injuries                             | 5 (3 to 8)    | 4 (2 to 6)    | -18.4% (-27.5% to -8.3%)  |
| 26 | Bahamas    | Other transport injuries                        | 6 (5 to 8)    | 7 (6 to 9)    | 16.3% (8.8% to 24.8%)     |
| 27 | Bahamas    | Other unintentional injuries                    | 12 (8 to 20)  | 12 (7 to 20)  | -5% (-10.6% to 0.4%)      |
| 28 | Bahamas    | Pedestrian road injuries                        | 22 (17 to 28) | 15 (11 to 19) | -34.3% (-40.9% to -27.3%) |
| 29 | Bahamas    | Physical violence by firearm                    | 2 (1 to 3)    | 7 (5 to 9)    | 204.5% (155.3% to 261.8%) |
| 30 | Bahamas    | Physical violence by other means                | 15 (11 to 23) | 20 (14 to 30) | 30.7% (17.6% to 43.9%)    |
| 31 | Bahamas    | Physical violence by sharp object               | 6 (4 to 9)    | 9 (5 to 14)   | 46.1% (26.8% to 67%)      |
| 32 | Bahamas    | Poisoning by carbon monoxide                    | 0 (0 to 0)    | 0 (0 to 0)    | 9.8% (-1.4% to 22.1%)     |
| 33 | Bahamas    | Poisoning by other means                        | 0 (0 to 0)    | 0 (0 to 0)    | -5% (-13.6% to 3.9%)      |
| 34 | Bahamas    | Pulmonary aspiration and foreign body in airway | 1 (0 to 1)    | 0 (0 to 1)    | -25% (-32% to -17%)       |
| 35 | Bahamas    | Self-harm by firearm                            | 0 (0 to 0)    | 0 (0 to 0)    | -0.5% (-10.3% to 9%)      |
| 36 | Bahamas    | Self-harm by other specified means              | 0 (0 to 0)    | 0 (0 to 0)    | 9.5% (2.6% to 17.5%)      |
| 37 | Bahamas    | Unintentional firearm injuries                  | 3 (2 to 6)    | 4 (2 to 7)    | 18.7% (10.6% to 27.8%)    |
| 38 | Bahamas    | Venomous animal contact                         | 4 (2 to 7)    | 4 (2 to 7)    | 1.1% (-4.5% to 7.3%)      |
| 39 | Bahrain    | Adverse effects of medical treatment            | 0 (0 to 0)    | 0 (0 to 0)    | 0% (0% to 0%)             |
| 40 | Bahrain    | Conflict and terrorism                          | 0 (0 to 0)    | 0 (0 to 0)    | NA                        |
| 41 | Bahrain    | Cyclist road injuries                           | 19 (13 to 27) | 17 (12 to 24) | -9.9% (-18.7% to 0.6%)    |
| 42 | Bahrain    | Drowning                                        | 0 (0 to 0)    | 0 (0 to 1)    | 88.9% (56.3% to 122%)     |
| 43 | Bahrain    | Environmental heat and cold exposure            | 4 (3 to 6)    | 4 (3 to 6)    | 2.9% (-2.7% to 8.1%)      |
| 44 | Bahrain    | Executions and police conflict                  | 0 (0 to 0)    | 0 (0 to 0)    | NA                        |
| 45 |            |                                                 |               |               |                           |
| 46 |            |                                                 |               |               |                           |

|    |            |                                                 |                |                |                           |
|----|------------|-------------------------------------------------|----------------|----------------|---------------------------|
| 1  |            |                                                 |                |                |                           |
| 2  | Bahrain    | Exposure to forces of nature                    | 0 (0 to 0)     | 0 (0 to 0)     | NA                        |
| 3  | Bahrain    | Falls                                           | 67 (52 to 88)  | 95 (72 to 126) | 41.5% (35.3% to 47.7%)    |
| 4  | Bahrain    | Fire, heat, and hot substances                  | 1 (0 to 1)     | 1 (0 to 1)     | -1.6% (-8% to 4.6%)       |
| 5  | Bahrain    | Foreign body in eyes                            | 0 (0 to 0)     | 0 (0 to 0)     | 1.2% (0.4% to 2.7%)       |
| 6  | Bahrain    | Foreign body in other body part                 | 1 (1 to 3)     | 1 (1 to 3)     | 1.8% (-2.8% to 6.4%)      |
| 7  | Bahrain    | Motor vehicle road injuries                     | 66 (52 to 82)  | 39 (30 to 50)  | -41.4% (-47.2% to -34.9%) |
| 8  | Bahrain    | Motorcyclist road injuries                      | 10 (7 to 13)   | 10 (7 to 13)   | 0.2% (-10.8% to 12%)      |
| 9  | Bahrain    | Non-venomous animal contact                     | 3 (1 to 5)     | 3 (1 to 5)     | 2.6% (-2.8% to 7.4%)      |
| 10 | Bahrain    | Other exposure to mechanical forces             | 24 (14 to 39)  | 26 (15 to 42)  | 9.6% (3.5% to 15.6%)      |
| 11 | Bahrain    | Other road injuries                             | 3 (1 to 4)     | 2 (1 to 4)     | -9% (-19.2% to 3.5%)      |
| 12 | Bahrain    | Other transport injuries                        | 5 (4 to 7)     | 6 (4 to 8)     | 6.6% (-0.4% to 13.8%)     |
| 13 | Bahrain    | Other unintentional injuries                    | 19 (12 to 30)  | 19 (12 to 31)  | 0.2% (-5% to 5.6%)        |
| 14 | Bahrain    | Pedestrian road injuries                        | 18 (14 to 24)  | 15 (11 to 20)  | -18% (-25.8% to -9.6%)    |
| 15 | Bahrain    | Physical violence by firearm                    | 0 (0 to 0)     | 1 (0 to 1)     | 146.3% (120.9% to 177.6%) |
| 16 | Bahrain    | Physical violence by other means                | 15 (10 to 20)  | 14 (10 to 19)  | -6.3% (-11.6% to -1.3%)   |
| 17 | Bahrain    | Physical violence by sharp object               | 2 (1 to 3)     | 2 (1 to 3)     | -3.9% (-11.6% to 4.8%)    |
| 18 | Bahrain    | Poisoning by carbon monoxide                    | 0 (0 to 0)     | 0 (0 to 0)     | 42.3% (29.8% to 57.8%)    |
| 19 | Bahrain    | Poisoning by other means                        | 0 (0 to 0)     | 0 (0 to 0)     | -6.1% (-13.1% to 1.8%)    |
| 20 | Bahrain    | Pulmonary aspiration and foreign body in airway | 0 (0 to 1)     | 0 (0 to 1)     | -11.2% (-20.4% to -2.9%)  |
| 21 | Bahrain    | Self-harm by firearm                            | 0 (0 to 0)     | 0 (0 to 0)     | 13.6% (0% to 29.4%)       |
| 22 | Bahrain    | Self-harm by other specified means              | 1 (1 to 2)     | 1 (1 to 2)     | 32.3% (24.4% to 41.5%)    |
| 23 | Bahrain    | Unintentional firearm injuries                  | 2 (1 to 3)     | 2 (1 to 3)     | 10% (1% to 20.5%)         |
| 24 | Bahrain    | Venomous animal contact                         | 2 (1 to 3)     | 2 (1 to 3)     | 4% (-2.3% to 11%)         |
| 25 | Bangladesh | Adverse effects of medical treatment            | 0 (0 to 0)     | 0 (0 to 0)     | 0% (0% to 0%)             |
| 26 | Bangladesh | Conflict and terrorism                          | 1 (0 to 2)     | 1 (0 to 1)     | NA                        |
| 27 | Bangladesh | Cyclist road injuries                           | 90 (69 to 116) | 88 (66 to 113) | -2.2% (-8.9% to 5.6%)     |
| 28 | Bangladesh | Drowning                                        | 0 (0 to 1)     | 0 (0 to 1)     | -8.9% (-19.5% to 2.9%)    |
| 29 | Bangladesh | Environmental heat and cold exposure            | 2 (2 to 3)     | 3 (2 to 4)     | 7.5% (2.2% to 13.9%)      |
| 30 | Bangladesh | Executions and police conflict                  | 0 (0 to 0)     | 0 (0 to 0)     | NA                        |
| 31 | Bangladesh | Exposure to forces of nature                    | 2 (1 to 5)     | 0 (0 to 0)     | NA                        |
| 32 | Bangladesh | Falls                                           | 33 (24 to 45)  | 53 (40 to 71)  | 62.9% (55.3% to 71.2%)    |
| 33 | Bangladesh | Fire, heat, and hot substances                  | 1 (0 to 1)     | 0 (0 to 1)     | -7.2% (-18.1% to 2.6%)    |
| 34 | Bangladesh | Foreign body in eyes                            | 0 (0 to 0)     | 0 (0 to 0)     | -1.9% (-3.3% to -0.9%)    |
| 35 | Bangladesh | Foreign body in other body part                 | 1 (1 to 3)     | 1 (1 to 2)     | -15% (-20.8% to -8.3%)    |
| 36 | Bangladesh | Motor vehicle road injuries                     | 25 (18 to 34)  | 29 (21 to 38)  | 14.7% (4.9% to 25.2%)     |
| 37 | Bangladesh | Motorcyclist road injuries                      | 28 (21 to 37)  | 35 (27 to 45)  | 22.7% (12.8% to 33.5%)    |
| 38 | Bangladesh | Non-venomous animal contact                     | 9 (5 to 16)    | 9 (5 to 17)    | -0.1% (-6.7% to 6.5%)     |
| 39 | Bangladesh | Other exposure to mechanical forces             | 8 (5 to 14)    | 11 (6 to 18)   | 27.5% (19.6% to 34.6%)    |
| 40 | Bangladesh | Other road injuries                             | 2 (1 to 4)     | 3 (2 to 5)     | 10.5% (0.9% to 21.3%)     |
| 41 | Bangladesh | Other transport injuries                        | 7 (5 to 9)     | 7 (5 to 9)     | 1.6% (-4.6% to 7.3%)      |
| 42 | Bangladesh | Other unintentional injuries                    | 11 (7 to 18)   | 11 (7 to 18)   | 3.6% (-2.9% to 9.4%)      |
| 43 | Bangladesh | Pedestrian road injuries                        | 31 (23 to 39)  | 32 (24 to 43)  | 6.3% (-2.1% to 15%)       |
| 44 | Bangladesh | Physical violence by firearm                    | 0 (0 to 0)     | 0 (0 to 0)     | 47.5% (24% to 73.2%)      |
| 45 |            |                                                 |                |                |                           |
| 46 |            |                                                 |                |                |                           |

|    |            |                                                 |               |               |                           |
|----|------------|-------------------------------------------------|---------------|---------------|---------------------------|
| 1  |            |                                                 |               |               |                           |
| 2  | Bangladesh | Physical violence by other means                | 18 (13 to 25) | 17 (13 to 25) | -1.5% (-7.7% to 4.7%)     |
| 3  | Bangladesh | Physical violence by sharp object               | 1 (0 to 1)    | 1 (0 to 1)    | -7.7% (-16.3% to 2.1%)    |
| 4  | Bangladesh | Poisoning by carbon monoxide                    | 0 (0 to 0)    | 0 (0 to 0)    | 16.6% (3% to 32.7%)       |
| 5  | Bangladesh | Poisoning by other means                        | 0 (0 to 0)    | 0 (0 to 0)    | -10.2% (-17.3% to -3%)    |
| 6  | Bangladesh | Pulmonary aspiration and foreign body in airway | 1 (0 to 1)    | 0 (0 to 1)    | -38.4% (-46.9% to -28.7%) |
| 7  | Bangladesh | Self-harm by firearm                            | 0 (0 to 0)    | 0 (0 to 0)    | -12.5% (-24.6% to 1.3%)   |
| 8  | Bangladesh | Self-harm by other specified means              | 2 (1 to 3)    | 1 (1 to 2)    | -38.4% (-43.7% to -33.4%) |
| 9  | Bangladesh | Unintentional firearm injuries                  | 1 (0 to 1)    | 1 (0 to 1)    | 2.2% (-8.7% to 12.1%)     |
| 10 | Bangladesh | Venomous animal contact                         | 4 (2 to 9)    | 5 (2 to 10)   | 4.5% (-3.7% to 13.7%)     |
| 11 | Barbados   | Adverse effects of medical treatment            | 0 (0 to 0)    | 0 (0 to 0)    | 0% (0% to 0%)             |
| 12 | Barbados   | Conflict and terrorism                          | 0 (0 to 0)    | 0 (0 to 0)    | NA                        |
| 13 | Barbados   | Cyclist road injuries                           | 29 (21 to 40) | 26 (18 to 35) | -11.8% (-20.7% to -2.2%)  |
| 14 | Barbados   | Drowning                                        | 0 (0 to 1)    | 0 (0 to 1)    | 20% (6.4% to 34.3%)       |
| 15 | Barbados   | Environmental heat and cold exposure            | 11 (8 to 15)  | 12 (8 to 16)  | 6.1% (0.9% to 11.2%)      |
| 16 | Barbados   | Executions and police conflict                  | 0 (0 to 0)    | 0 (0 to 0)    | NA                        |
| 17 | Barbados   | Exposure to forces of nature                    | 0 (0 to 0)    | 0 (0 to 0)    | NA                        |
| 18 | Barbados   | Falls                                           | 44 (34 to 57) | 66 (51 to 85) | 48.3% (42.6% to 54.1%)    |
| 19 | Barbados   | Fire, heat, and hot substances                  | 4 (2 to 7)    | 4 (2 to 6)    | -8% (-14.3% to -1.2%)     |
| 20 | Barbados   | Foreign body in eyes                            | 0 (0 to 0)    | 0 (0 to 0)    | 0.8% (0.3% to 1.5%)       |
| 21 | Barbados   | Foreign body in other body part                 | 1 (1 to 3)    | 1 (1 to 3)    | -1.6% (-6.6% to 3.1%)     |
| 22 | Barbados   | Motor vehicle road injuries                     | 36 (26 to 46) | 28 (21 to 35) | -22.4% (-30.1% to -13.8%) |
| 23 | Barbados   | Motorcyclist road injuries                      | 15 (11 to 20) | 14 (11 to 19) | -5.5% (-17.2% to 7.1%)    |
| 24 | Barbados   | Non-venomous animal contact                     | 3 (1 to 5)    | 3 (1 to 5)    | -3.2% (-8.4% to 3.3%)     |
| 25 | Barbados   | Other exposure to mechanical forces             | 32 (18 to 55) | 38 (21 to 62) | 16.1% (9.8% to 22.5%)     |
| 26 | Barbados   | Other road injuries                             | 4 (2 to 7)    | 4 (2 to 6)    | -9.8% (-19.5% to 1.3%)    |
| 27 | Barbados   | Other transport injuries                        | 4 (3 to 6)    | 4 (3 to 6)    | -0.9% (-6.5% to 5.5%)     |
| 28 | Barbados   | Other unintentional injuries                    | 14 (8 to 23)  | 13 (8 to 22)  | -1.8% (-6.8% to 3.7%)     |
| 29 | Barbados   | Pedestrian road injuries                        | 15 (11 to 19) | 11 (8 to 14)  | -26.4% (-34% to -17.6%)   |
| 30 | Barbados   | Physical violence by firearm                    | 1 (1 to 1)    | 2 (1 to 2)    | 104.2% (77.3% to 139.1%)  |
| 31 | Barbados   | Physical violence by other means                | 14 (10 to 20) | 15 (10 to 22) | 6.3% (-3.2% to 16.2%)     |
| 32 | Barbados   | Physical violence by sharp object               | 5 (3 to 7)    | 5 (3 to 8)    | 16.7% (2.6% to 33.1%)     |
| 33 | Barbados   | Poisoning by carbon monoxide                    | 0 (0 to 0)    | 0 (0 to 0)    | 21.8% (6.4% to 37.1%)     |
| 34 | Barbados   | Poisoning by other means                        | 0 (0 to 0)    | 0 (0 to 0)    | -13.2% (-23.2% to -4.7%)  |
| 35 | Barbados   | Pulmonary aspiration and foreign body in airway | 0 (0 to 1)    | 0 (0 to 1)    | -11.7% (-19.5% to -3.7%)  |
| 36 | Barbados   | Self-harm by firearm                            | 0 (0 to 0)    | 0 (0 to 0)    | 1.9% (-8.3% to 13.3%)     |
| 37 | Barbados   | Self-harm by other specified means              | 0 (0 to 1)    | 0 (0 to 1)    | -11.5% (-18.9% to -4.1%)  |
| 38 | Barbados   | Unintentional firearm injuries                  | 5 (3 to 8)    | 5 (3 to 8)    | -11.3% (-21.3% to -1.6%)  |
| 39 | Barbados   | Venomous animal contact                         | 5 (2 to 8)    | 4 (2 to 8)    | -3.1% (-7.5% to 2.1%)     |
| 40 | Belarus    | Adverse effects of medical treatment            | 0 (0 to 0)    | 0 (0 to 0)    | 0% (0% to 0%)             |
| 41 | Belarus    | Conflict and terrorism                          | 0 (0 to 0)    | 0 (0 to 0)    | NA                        |
| 42 | Belarus    | Cyclist road injuries                           | 61 (43 to 82) | 44 (31 to 61) | -27.3% (-36.4% to -17%)   |
| 43 | Belarus    | Drowning                                        | 1 (1 to 2)    | 1 (1 to 2)    | -1.5% (-11.5% to 9.6%)    |
| 44 | Belarus    | Environmental heat and cold exposure            | 12 (9 to 17)  | 10 (7 to 14)  | -15.7% (-24.4% to -4.5%)  |
| 45 |            |                                                 |               |               |                           |
| 46 |            |                                                 |               |               |                           |



|    |         |                                                 |                  |                  |                           |
|----|---------|-------------------------------------------------|------------------|------------------|---------------------------|
| 1  |         |                                                 |                  |                  |                           |
| 2  | Belarus | Executions and police conflict                  | 0 (0 to 0)       | 0 (0 to 0)       | NA                        |
| 3  | Belarus | Exposure to forces of nature                    | 0 (0 to 0)       | 0 (0 to 0)       | NA                        |
| 4  | Belarus | Falls                                           | 268 (209 to 342) | 314 (248 to 406) | 17.4% (12.1% to 23.4%)    |
| 5  | Belarus | Fire, heat, and hot substances                  | 5 (3 to 8)       | 4 (3 to 7)       | -7.5% (-14.1% to -0.8%)   |
| 6  | Belarus | Foreign body in eyes                            | 0 (0 to 0)       | 0 (0 to 0)       | 0.8% (0.4% to 1.3%)       |
| 7  | Belarus | Foreign body in other body part                 | 2 (1 to 4)       | 2 (1 to 4)       | -0.1% (-6.6% to 5.8%)     |
| 8  | Belarus | Motor vehicle road injuries                     | 155 (120 to 196) | 108 (83 to 137)  | -30% (-39.8% to -20.3%)   |
| 9  | Belarus | Motorcyclist road injuries                      | 24 (18 to 32)    | 15 (11 to 20)    | -39% (-48.8% to -28.1%)   |
| 10 | Belarus | Non-venomous animal contact                     | 5 (3 to 8)       | 4 (2 to 7)       | -10.6% (-15.5% to -6%)    |
| 11 | Belarus | Other exposure to mechanical forces             | 81 (50 to 128)   | 77 (47 to 121)   | -5% (-11.3% to 0.7%)      |
| 12 | Belarus | Other road injuries                             | 3 (1 to 4)       | 2 (1 to 4)       | -17.8% (-28% to -6.7%)    |
| 13 | Belarus | Other transport injuries                        | 6 (4 to 8)       | 6 (4 to 8)       | 3.2% (-1.4% to 8.2%)      |
| 14 | Belarus | Other unintentional injuries                    | 27 (17 to 44)    | 25 (15 to 40)    | -8.7% (-14.9% to -2.8%)   |
| 15 | Belarus | Pedestrian road injuries                        | 78 (61 to 98)    | 37 (28 to 48)    | -52.3% (-58.4% to -45.8%) |
| 16 | Belarus | Physical violence by firearm                    | 0 (0 to 0)       | 0 (0 to 1)       | 50.4% (25.8% to 78.8%)    |
| 17 | Belarus | Physical violence by other means                | 34 (25 to 48)    | 27 (19 to 37)    | -20.4% (-28.7% to -10.5%) |
| 18 | Belarus | Physical violence by sharp object               | 4 (3 to 7)       | 3 (2 to 5)       | -33.4% (-43.4% to -22.7%) |
| 19 | Belarus | Poisoning by carbon monoxide                    | 0 (0 to 0)       | 0 (0 to 0)       | -17.5% (-29.9% to -4.4%)  |
| 20 | Belarus | Poisoning by other means                        | 0 (0 to 1)       | 0 (0 to 1)       | -10.2% (-20.5% to -0.8%)  |
| 21 | Belarus | Pulmonary aspiration and foreign body in airway | 1 (1 to 2)       | 1 (1 to 2)       | -14.4% (-20.8% to -7.2%)  |
| 22 | Belarus | Self-harm by firearm                            | 1 (0 to 1)       | 1 (0 to 1)       | 0.5% (-14.5% to 15.8%)    |
| 23 | Belarus | Self-harm by other specified means              | 5 (3 to 7)       | 5 (3 to 7)       | -0.8% (-7.8% to 6.9%)     |
| 24 | Belarus | Unintentional firearm injuries                  | 1 (1 to 2)       | 1 (1 to 2)       | 3.8% (-7.7% to 15.5%)     |
| 25 | Belarus | Venomous animal contact                         | 4 (2 to 7)       | 3 (1 to 6)       | -10.7% (-16.4% to -5.6%)  |
| 26 | Belgium | Adverse effects of medical treatment            | 0 (0 to 0)       | 0 (0 to 0)       | 0% (0% to 0%)             |
| 27 | Belgium | Conflict and terrorism                          | 1 (0 to 1)       | 0 (0 to 0)       | NA                        |
| 28 | Belgium | Cyclist road injuries                           | 27 (19 to 36)    | 21 (15 to 28)    | -24.6% (-36.2% to -12.9%) |
| 29 | Belgium | Drowning                                        | 0 (0 to 0)       | 0 (0 to 0)       | 50.1% (36.8% to 65.1%)    |
| 30 | Belgium | Environmental heat and cold exposure            | 2 (1 to 2)       | 2 (1 to 3)       | 0% (-5.2% to 4.5%)        |
| 31 | Belgium | Executions and police conflict                  | 0 (0 to 0)       | 0 (0 to 0)       | NA                        |
| 32 | Belgium | Exposure to forces of nature                    | 0 (0 to 0)       | 0 (0 to 0)       | NA                        |
| 33 | Belgium | Falls                                           | 285 (223 to 364) | 372 (293 to 472) | 30.5% (26.3% to 35%)      |
| 34 | Belgium | Fire, heat, and hot substances                  | 2 (1 to 4)       | 2 (1 to 4)       | -13.4% (-19.6% to -8.1%)  |
| 35 | Belgium | Foreign body in eyes                            | 0 (0 to 0)       | 0 (0 to 0)       | 0.3% (0% to 0.9%)         |
| 36 | Belgium | Foreign body in other body part                 | 1 (1 to 3)       | 1 (1 to 3)       | 2.1% (-2.9% to 7.3%)      |
| 37 | Belgium | Motor vehicle road injuries                     | 49 (39 to 62)    | 24 (18 to 31)    | -51.9% (-58.6% to -44.6%) |
| 38 | Belgium | Motorcyclist road injuries                      | 10 (8 to 14)     | 10 (7 to 13)     | -6.3% (-22% to 11.9%)     |
| 39 | Belgium | Non-venomous animal contact                     | 3 (2 to 5)       | 3 (1 to 5)       | -8.4% (-12.6% to -4.1%)   |
| 40 | Belgium | Other exposure to mechanical forces             | 49 (30 to 78)    | 46 (28 to 73)    | -5.7% (-12.2% to -0.2%)   |
| 41 | Belgium | Other road injuries                             | 1 (1 to 2)       | 1 (1 to 2)       | -11.9% (-26.3% to 2.7%)   |
| 42 | Belgium | Other transport injuries                        | 5 (4 to 7)       | 5 (4 to 7)       | 9.1% (4.1% to 13.9%)      |
| 43 | Belgium | Other unintentional injuries                    | 26 (17 to 41)    | 24 (15 to 39)    | -6.3% (-11.2% to -1.1%)   |
| 44 | Belgium | Pedestrian road injuries                        | 18 (14 to 23)    | 7 (5 to 9)       | -63.4% (-69.7% to -56.7%) |
| 45 |         |                                                 |                  |                  |                           |
| 46 |         |                                                 |                  |                  |                           |

|    |         |                                                 |               |               |                           |
|----|---------|-------------------------------------------------|---------------|---------------|---------------------------|
| 1  |         |                                                 |               |               |                           |
| 2  | Belgium | Physical violence by firearm                    | 1 (0 to 1)    | 1 (0 to 1)    | 10.8% (-1.2% to 25.5%)    |
| 3  | Belgium | Physical violence by other means                | 20 (14 to 28) | 17 (12 to 25) | -12.7% (-18.9% to -6.7%)  |
| 4  | Belgium | Physical violence by sharp object               | 2 (1 to 3)    | 2 (1 to 3)    | -18.1% (-26.4% to -9.4%)  |
| 5  | Belgium | Poisoning by carbon monoxide                    | 0 (0 to 0)    | 0 (0 to 0)    | -23.6% (-31.8% to -14.8%) |
| 6  | Belgium | Poisoning by other means                        | 0 (0 to 1)    | 0 (0 to 0)    | -29.2% (-35.3% to -22.5%) |
| 7  | Belgium | Pulmonary aspiration and foreign body in airway | 1 (0 to 1)    | 1 (0 to 1)    | -15% (-24.4% to -4.3%)    |
| 8  | Belgium | Self-harm by firearm                            | 1 (0 to 1)    | 0 (0 to 1)    | -34.9% (-45.8% to -22%)   |
| 9  | Belgium | Self-harm by other specified means              | 5 (3 to 7)    | 4 (3 to 7)    | -6.1% (-11.5% to -0.1%)   |
| 10 | Belgium | Unintentional firearm injuries                  | 1 (0 to 2)    | 1 (0 to 2)    | -1% (-9.9% to 8.1%)       |
| 11 | Belgium | Venomous animal contact                         | 1 (0 to 2)    | 1 (0 to 2)    | -9% (-14.5% to -2.2%)     |
| 12 | Belize  | Adverse effects of medical treatment            | 0 (0 to 0)    | 0 (0 to 0)    | 0% (0% to 0%)             |
| 13 | Belize  | Conflict and terrorism                          | 19 (7 to 43)  | 0 (0 to 0)    | NA                        |
| 14 | Belize  | Cyclist road injuries                           | 44 (33 to 58) | 35 (26 to 47) | -20.7% (-29.3% to -10%)   |
| 15 | Belize  | Drowning                                        | 0 (0 to 1)    | 0 (0 to 1)    | 21.6% (11.7% to 33.9%)    |
| 16 | Belize  | Environmental heat and cold exposure            | 10 (7 to 14)  | 10 (7 to 15)  | 4.7% (0.4% to 9.5%)       |
| 17 | Belize  | Executions and police conflict                  | 0 (0 to 0)    | 0 (0 to 0)    | NA                        |
| 18 | Belize  | Exposure to forces of nature                    | 0 (0 to 0)    | 0 (0 to 0)    | NA                        |
| 19 | Belize  | Falls                                           | 41 (32 to 53) | 64 (50 to 84) | 56% (50% to 62.1%)        |
| 20 | Belize  | Fire, heat, and hot substances                  | 3 (2 to 6)    | 3 (2 to 6)    | 4.7% (-3% to 14.1%)       |
| 21 | Belize  | Foreign body in eyes                            | 0 (0 to 0)    | 0 (0 to 0)    | -0.5% (-1% to 0%)         |
| 22 | Belize  | Foreign body in other body part                 | 1 (1 to 3)    | 1 (1 to 3)    | -2% (-6.9% to 3.6%)       |
| 23 | Belize  | Motor vehicle road injuries                     | 38 (28 to 49) | 35 (26 to 45) | -6.8% (-17% to 3.6%)      |
| 24 | Belize  | Motorcyclist road injuries                      | 15 (11 to 19) | 23 (17 to 30) | 53.9% (31.8% to 78.5%)    |
| 25 | Belize  | Non-venomous animal contact                     | 3 (2 to 6)    | 4 (2 to 7)    | 9.9% (1.8% to 19.8%)      |
| 26 | Belize  | Other exposure to mechanical forces             | 42 (25 to 69) | 51 (30 to 83) | 22.3% (13.3% to 32.1%)    |
| 27 | Belize  | Other road injuries                             | 3 (2 to 6)    | 4 (2 to 6)    | 6% (-5.6% to 18.1%)       |
| 28 | Belize  | Other transport injuries                        | 6 (4 to 8)    | 7 (5 to 9)    | 10.2% (1.5% to 18.1%)     |
| 29 | Belize  | Other unintentional injuries                    | 12 (8 to 20)  | 13 (8 to 21)  | 3% (-3.2% to 8.9%)        |
| 30 | Belize  | Pedestrian road injuries                        | 17 (13 to 22) | 15 (11 to 19) | -10.7% (-19.3% to 0%)     |
| 31 | Belize  | Physical violence by firearm                    | 1 (0 to 1)    | 3 (2 to 4)    | 373.2% (300.1% to 481%)   |
| 32 | Belize  | Physical violence by other means                | 10 (7 to 15)  | 19 (14 to 29) | 89.3% (69% to 115.7%)     |
| 33 | Belize  | Physical violence by sharp object               | 4 (3 to 6)    | 8 (5 to 12)   | 90.2% (65.1% to 123.1%)   |
| 34 | Belize  | Poisoning by carbon monoxide                    | 0 (0 to 0)    | 0 (0 to 0)    | 18.1% (-0.3% to 37.9%)    |
| 35 | Belize  | Poisoning by other means                        | 0 (0 to 0)    | 0 (0 to 0)    | -29.6% (-40.8% to -17.9%) |
| 36 | Belize  | Pulmonary aspiration and foreign body in airway | 1 (0 to 1)    | 0 (0 to 1)    | -24.4% (-32.1% to -15.2%) |
| 37 | Belize  | Self-harm by firearm                            | 0 (0 to 0)    | 0 (0 to 1)    | 34% (19.3% to 51.3%)      |
| 38 | Belize  | Self-harm by other specified means              | 0 (0 to 1)    | 0 (0 to 1)    | 7.1% (-2.7% to 16.7%)     |
| 39 | Belize  | Unintentional firearm injuries                  | 8 (5 to 11)   | 8 (5 to 12)   | 10.4% (-1.9% to 22%)      |
| 40 | Belize  | Venomous animal contact                         | 6 (3 to 10)   | 7 (3 to 12)   | 20.8% (11.9% to 32.7%)    |
| 41 | Benin   | Adverse effects of medical treatment            | 0 (0 to 0)    | 0 (0 to 0)    | 0% (0% to 0%)             |
| 42 | Benin   | Conflict and terrorism                          | 0 (0 to 0)    | 0 (0 to 0)    | NA                        |
| 43 | Benin   | Cyclist road injuries                           | 30 (19 to 44) | 30 (19 to 44) | 0.9% (-7.3% to 9.9%)      |
| 44 | Benin   | Drowning                                        | 0 (0 to 0)    | 0 (0 to 0)    | -15.3% (-22% to -8.2%)    |
| 45 |         |                                                 |               |               |                           |
| 46 |         |                                                 |               |               |                           |

|    |         |                                                 |                |                |                           |
|----|---------|-------------------------------------------------|----------------|----------------|---------------------------|
| 1  |         |                                                 |                |                |                           |
| 2  | Benin   | Environmental heat and cold exposure            | 0 (0 to 1)     | 0 (0 to 1)     | 3.9% (-1.4% to 10%)       |
| 3  | Benin   | Executions and police conflict                  | 0 (0 to 0)     | 0 (0 to 0)     | NA                        |
| 4  | Benin   | Exposure to forces of nature                    | 0 (0 to 0)     | 0 (0 to 0)     | NA                        |
| 5  | Benin   | Falls                                           | 18 (12 to 27)  | 20 (13 to 29)  | 11% (6.5% to 15.2%)       |
| 6  | Benin   | Fire, heat, and hot substances                  | 0 (0 to 0)     | 0 (0 to 0)     | -6.7% (-12.1% to -1.2%)   |
| 7  | Benin   | Foreign body in eyes                            | 0 (0 to 0)     | 0 (0 to 0)     | 0.1% (-0.3% to 0.8%)      |
| 8  | Benin   | Foreign body in other body part                 | 3 (1 to 8)     | 3 (1 to 7)     | -0.7% (-5.3% to 3.6%)     |
| 9  | Benin   | Motor vehicle road injuries                     | 43 (30 to 63)  | 54 (37 to 75)  | 25.4% (16.1% to 36.3%)    |
| 10 | Benin   | Motorcyclist road injuries                      | 47 (35 to 62)  | 37 (27 to 50)  | -22.3% (-28.5% to -16.2%) |
| 11 | Benin   | Non-venomous animal contact                     | 3 (1 to 5)     | 3 (1 to 5)     | -2.4% (-6.7% to 2.1%)     |
| 12 | Benin   | Other exposure to mechanical forces             | 26 (13 to 46)  | 23 (11 to 43)  | -8.9% (-14.1% to -3.6%)   |
| 13 | Benin   | Other road injuries                             | 2 (1 to 3)     | 2 (1 to 3)     | 11.6% (0.9% to 23.3%)     |
| 14 | Benin   | Other transport injuries                        | 4 (3 to 5)     | 3 (2 to 4)     | -10.7% (-16.8% to -3.5%)  |
| 15 | Benin   | Other unintentional injuries                    | 3 (2 to 5)     | 2 (1 to 4)     | -12.7% (-17.9% to -7.1%)  |
| 16 | Benin   | Pedestrian road injuries                        | 39 (28 to 52)  | 47 (34 to 63)  | 21.7% (13.7% to 30.8%)    |
| 17 | Benin   | Physical violence by firearm                    | 0 (0 to 0)     | 0 (0 to 0)     | 39.5% (24.3% to 56.8%)    |
| 18 | Benin   | Physical violence by other means                | 8 (5 to 11)    | 9 (6 to 13)    | 17% (10.1% to 23.4%)      |
| 19 | Benin   | Physical violence by sharp object               | 2 (1 to 3)     | 2 (1 to 4)     | 16.2% (8.3% to 24.6%)     |
| 20 | Benin   | Poisoning by carbon monoxide                    | 0 (0 to 0)     | 0 (0 to 0)     | 9.4% (-1.8% to 21.1%)     |
| 21 | Benin   | Poisoning by other means                        | 0 (0 to 0)     | 0 (0 to 0)     | -15.9% (-23.4% to -8.2%)  |
| 22 | Benin   | Pulmonary aspiration and foreign body in airway | 0 (0 to 0)     | 0 (0 to 0)     | -12.8% (-21.2% to -3.8%)  |
| 23 | Benin   | Self-harm by firearm                            | 0 (0 to 0)     | 0 (0 to 0)     | 20.7% (12.5% to 30.2%)    |
| 24 | Benin   | Self-harm by other specified means              | 0 (0 to 0)     | 0 (0 to 0)     | 10.9% (4.8% to 16.9%)     |
| 25 | Benin   | Unintentional firearm injuries                  | 1 (0 to 2)     | 1 (0 to 2)     | -12.1% (-20.2% to -4.1%)  |
| 26 | Benin   | Venomous animal contact                         | 0 (0 to 1)     | 0 (0 to 1)     | -2.2% (-8.7% to 5.4%)     |
| 27 | Bermuda | Adverse effects of medical treatment            | 0 (0 to 0)     | 0 (0 to 0)     | 0% (0% to 0%)             |
| 28 | Bermuda | Conflict and terrorism                          | 0 (0 to 0)     | 0 (0 to 0)     | NA                        |
| 29 | Bermuda | Cyclist road injuries                           | 23 (14 to 36)  | 18 (11 to 29)  | -21% (-30.3% to -9.4%)    |
| 30 | Bermuda | Drowning                                        | 0 (0 to 0)     | 0 (0 to 0)     | 48.3% (33.7% to 65.4%)    |
| 31 | Bermuda | Environmental heat and cold exposure            | 1 (1 to 3)     | 1 (1 to 3)     | 2.4% (-3% to 8.2%)        |
| 32 | Bermuda | Executions and police conflict                  | 0 (0 to 0)     | 0 (0 to 0)     | NA                        |
| 33 | Bermuda | Exposure to forces of nature                    | 0 (0 to 0)     | 0 (0 to 0)     | NA                        |
| 34 | Bermuda | Falls                                           | 27 (17 to 40)  | 40 (26 to 62)  | 51.9% (44.9% to 58.5%)    |
| 35 | Bermuda | Fire, heat, and hot substances                  | 1 (0 to 1)     | 1 (0 to 1)     | 22.8% (17.8% to 28.9%)    |
| 36 | Bermuda | Foreign body in eyes                            | 0 (0 to 0)     | 0 (0 to 0)     | 0.5% (0% to 1.1%)         |
| 37 | Bermuda | Foreign body in other body part                 | 1 (1 to 3)     | 2 (1 to 3)     | 6.1% (-1.6% to 12.5%)     |
| 38 | Bermuda | Motor vehicle road injuries                     | 22 (14 to 33)  | 17 (10 to 25)  | -23.4% (-32.9% to -13.2%) |
| 39 | Bermuda | Motorcyclist road injuries                      | 69 (53 to 88)  | 48 (37 to 62)  | -30.5% (-37.5% to -22.3%) |
| 40 | Bermuda | Non-venomous animal contact                     | 2 (1 to 4)     | 2 (1 to 3)     | -3.5% (-8.2% to 1.8%)     |
| 41 | Bermuda | Other exposure to mechanical forces             | 56 (28 to 103) | 68 (33 to 126) | 21.8% (14.9% to 28.5%)    |
| 42 | Bermuda | Other road injuries                             | 6 (3 to 12)    | 5 (2 to 9)     | -20.7% (-29% to -10.6%)   |
| 43 | Bermuda | Other transport injuries                        | 3 (2 to 4)     | 3 (2 to 4)     | 8.8% (2.4% to 17.4%)      |
| 44 | Bermuda | Other unintentional injuries                    | 5 (3 to 9)     | 5 (3 to 10)    | 12.1% (4.5% to 19.2%)     |
| 45 |         |                                                 |                |                |                           |
| 46 |         |                                                 |                |                |                           |

|    |                                  |                                                 |               |                 |                           |
|----|----------------------------------|-------------------------------------------------|---------------|-----------------|---------------------------|
| 1  |                                  |                                                 |               |                 |                           |
| 2  | Bermuda                          | Pedestrian road injuries                        | 16 (10 to 23) | 13 (8 to 20)    | -16.8% (-25.8% to -6.5%)  |
| 3  | Bermuda                          | Physical violence by firearm                    | 1 (0 to 1)    | 1 (1 to 2)      | 82.6% (62.6% to 107.4%)   |
| 4  | Bermuda                          | Physical violence by other means                | 11 (7 to 16)  | 11 (7 to 17)    | -0.4% (-7.4% to 6.4%)     |
| 5  | Bermuda                          | Physical violence by sharp object               | 3 (2 to 6)    | 3 (1 to 6)      | -4.5% (-14.1% to 5.2%)    |
| 6  | Bermuda                          | Poisoning by carbon monoxide                    | 0 (0 to 0)    | 0 (0 to 0)      | -1% (-14.8% to 13.7%)     |
| 7  | Bermuda                          | Poisoning by other means                        | 0 (0 to 0)    | 0 (0 to 0)      | -26.1% (-38% to -13%)     |
| 8  | Bermuda                          | Pulmonary aspiration and foreign body in airway | 0 (0 to 0)    | 0 (0 to 0)      | 2.8% (-8.1% to 14.3%)     |
| 9  | Bermuda                          | Self-harm by firearm                            | 0 (0 to 0)    | 0 (0 to 0)      | -3.7% (-10.1% to 3.2%)    |
| 10 | Bermuda                          | Self-harm by other specified means              | 0 (0 to 0)    | 0 (0 to 0)      | -10.9% (-20.3% to -1.4%)  |
| 11 | Bermuda                          | Unintentional firearm injuries                  | 2 (1 to 4)    | 3 (1 to 6)      | 34.2% (22.6% to 46.6%)    |
| 12 | Bermuda                          | Venomous animal contact                         | 1 (0 to 3)    | 1 (0 to 3)      | -3.3% (-8.4% to 2.7%)     |
| 13 | Bhutan                           | Adverse effects of medical treatment            | 0 (0 to 0)    | 0 (0 to 0)      | 0% (0% to 0%)             |
| 14 | Bhutan                           | Conflict and terrorism                          | 0 (0 to 0)    | 0 (0 to 0)      | NA                        |
| 15 | Bhutan                           | Cyclist road injuries                           | 73 (53 to 96) | 93 (70 to 122)  | 28.5% (19.4% to 38.5%)    |
| 16 | Bhutan                           | Drowning                                        | 0 (0 to 0)    | 0 (0 to 1)      | 14.3% (-0.4% to 27.7%)    |
| 17 | Bhutan                           | Environmental heat and cold exposure            | 2 (1 to 3)    | 2 (2 to 3)      | 7% (2.6% to 11.6%)        |
| 18 | Bhutan                           | Executions and police conflict                  | 0 (0 to 0)    | 0 (0 to 0)      | NA                        |
| 19 | Bhutan                           | Exposure to forces of nature                    | 0 (0 to 0)    | 0 (0 to 0)      | NA                        |
| 20 | Bhutan                           | Falls                                           | 60 (48 to 76) | 118 (95 to 150) | 96.7% (86.9% to 108%)     |
| 21 | Bhutan                           | Fire, heat, and hot substances                  | 1 (0 to 1)    | 1 (0 to 1)      | -8.5% (-15.4% to -0.9%)   |
| 22 | Bhutan                           | Foreign body in eyes                            | 0 (0 to 0)    | 0 (0 to 0)      | 0.6% (-0.1% to 1.7%)      |
| 23 | Bhutan                           | Foreign body in other body part                 | 1 (1 to 2)    | 1 (1 to 2)      | 1.9% (-4.1% to 8.5%)      |
| 24 | Bhutan                           | Motor vehicle road injuries                     | 44 (33 to 58) | 51 (37 to 68)   | 16.2% (6.4% to 25.9%)     |
| 25 | Bhutan                           | Motorcyclist road injuries                      | 32 (24 to 41) | 31 (23 to 41)   | -2.3% (-11.3% to 6.8%)    |
| 26 | Bhutan                           | Non-venomous animal contact                     | 10 (6 to 18)  | 8 (5 to 14)     | -22.7% (-28% to -17%)     |
| 27 | Bhutan                           | Other exposure to mechanical forces             | 30 (19 to 48) | 26 (16 to 41)   | -14.1% (-20.1% to -8%)    |
| 28 | Bhutan                           | Other road injuries                             | 2 (1 to 3)    | 2 (1 to 4)      | 33.3% (22.8% to 46.8%)    |
| 29 | Bhutan                           | Other transport injuries                        | 5 (4 to 7)    | 5 (4 to 7)      | -1.2% (-9.1% to 6.9%)     |
| 30 | Bhutan                           | Other unintentional injuries                    | 10 (7 to 16)  | 11 (7 to 17)    | 3.6% (-1.2% to 8.4%)      |
| 31 | Bhutan                           | Pedestrian road injuries                        | 50 (37 to 63) | 42 (31 to 54)   | -15.5% (-22.1% to -8.4%)  |
| 32 | Bhutan                           | Physical violence by firearm                    | 0 (0 to 0)    | 0 (0 to 0)      | 63.6% (37.2% to 91.7%)    |
| 33 | Bhutan                           | Physical violence by other means                | 20 (14 to 28) | 20 (14 to 28)   | -0.4% (-6.3% to 5.4%)     |
| 34 | Bhutan                           | Physical violence by sharp object               | 1 (0 to 1)    | 1 (0 to 1)      | -11.7% (-19.9% to -3.5%)  |
| 35 | Bhutan                           | Poisoning by carbon monoxide                    | 0 (0 to 0)    | 0 (0 to 0)      | 45.3% (28.7% to 64.3%)    |
| 36 | Bhutan                           | Poisoning by other means                        | 0 (0 to 0)    | 0 (0 to 0)      | 0.1% (-8.7% to 9.1%)      |
| 37 | Bhutan                           | Pulmonary aspiration and foreign body in airway | 0 (0 to 1)    | 0 (0 to 1)      | -27.5% (-34.7% to -20.1%) |
| 38 | Bhutan                           | Self-harm by firearm                            | 0 (0 to 0)    | 0 (0 to 0)      | 20.8% (5.1% to 40.5%)     |
| 39 | Bhutan                           | Self-harm by other specified means              | 1 (1 to 2)    | 1 (1 to 2)      | 1.4% (-4.5% to 7.8%)      |
| 40 | Bhutan                           | Unintentional firearm injuries                  | 1 (1 to 2)    | 1 (0 to 1)      | -40.9% (-48.3% to -33.9%) |
| 41 | Bhutan                           | Venomous animal contact                         | 4 (2 to 9)    | 4 (1 to 8)      | -9.3% (-16.8% to -0.4%)   |
| 42 | Bolivia (Plurinational State of) | Adverse effects of medical treatment            | 0 (0 to 0)    | 0 (0 to 0)      | 0% (0% to 0%)             |
| 43 | Bolivia (Plurinational State of) | Conflict and terrorism                          | 1 (0 to 1)    | 0 (0 to 0)      | NA                        |
| 44 | Bolivia (Plurinational State of) | Cyclist road injuries                           | 11 (7 to 15)  | 9 (6 to 13)     | -14.5% (-22.5% to -6.1%)  |
| 45 |                                  |                                                 |               |                 |                           |
| 46 |                                  |                                                 |               |                 |                           |

|    |                                  |                                                 |                  |                  |                           |
|----|----------------------------------|-------------------------------------------------|------------------|------------------|---------------------------|
| 1  |                                  |                                                 |                  |                  |                           |
| 2  | Bolivia (Plurinational State of) | Drowning                                        | 0 (0 to 1)       | 0 (0 to 0)       | -22.4% (-30.2% to -13.1%) |
| 3  | Bolivia (Plurinational State of) | Environmental heat and cold exposure            | 8 (6 to 11)      | 8 (6 to 12)      | 0.5% (-3.5% to 5.3%)      |
| 4  | Bolivia (Plurinational State of) | Executions and police conflict                  | 0 (0 to 0)       | 0 (0 to 0)       | NA                        |
| 5  | Bolivia (Plurinational State of) | Exposure to forces of nature                    | 0 (0 to 0)       | 2 (1 to 3)       | NA                        |
| 6  | Bolivia (Plurinational State of) | Falls                                           | 60 (47 to 77)    | 79 (61 to 102)   | 32% (25.9% to 38.4%)      |
| 7  | Bolivia (Plurinational State of) | Fire, heat, and hot substances                  | 3 (2 to 6)       | 3 (2 to 5)       | -21.1% (-28.9% to -13.7%) |
| 8  | Bolivia (Plurinational State of) | Foreign body in eyes                            | 0 (0 to 0)       | 0 (0 to 0)       | 0.8% (0.3% to 1.3%)       |
| 9  | Bolivia (Plurinational State of) | Foreign body in other body part                 | 2 (1 to 5)       | 2 (1 to 4)       | -10.9% (-18.8% to -4.1%)  |
| 10 | Bolivia (Plurinational State of) | Motor vehicle road injuries                     | 24 (18 to 31)    | 21 (16 to 26)    | -13.3% (-20.7% to -5.7%)  |
| 11 | Bolivia (Plurinational State of) | Motorcyclist road injuries                      | 8 (6 to 10)      | 7 (5 to 9)       | -6.1% (-14.9% to 4.1%)    |
| 12 | Bolivia (Plurinational State of) | Non-venomous animal contact                     | 3 (2 to 6)       | 3 (2 to 5)       | -7.7% (-13.4% to -2.5%)   |
| 13 | Bolivia (Plurinational State of) | Other exposure to mechanical forces             | 34 (20 to 54)    | 33 (20 to 53)    | -2.5% (-9.9% to 5.4%)     |
| 14 | Bolivia (Plurinational State of) | Other road injuries                             | 2 (1 to 4)       | 2 (1 to 4)       | -9.5% (-18.4% to 0.2%)    |
| 15 | Bolivia (Plurinational State of) | Other transport injuries                        | 5 (4 to 6)       | 5 (4 to 6)       | -8.7% (-13.9% to -3.8%)   |
| 16 | Bolivia (Plurinational State of) | Other unintentional injuries                    | 24 (16 to 37)    | 16 (11 to 25)    | -32.6% (-36.9% to -28.1%) |
| 17 | Bolivia (Plurinational State of) | Pedestrian road injuries                        | 18 (14 to 23)    | 12 (9 to 15)     | -35.7% (-41.2% to -29.6%) |
| 18 | Bolivia (Plurinational State of) | Physical violence by firearm                    | 0 (0 to 1)       | 1 (0 to 1)       | 67.6% (43.6% to 97.3%)    |
| 19 | Bolivia (Plurinational State of) | Physical violence by other means                | 8 (6 to 12)      | 8 (6 to 12)      | -4.1% (-10.6% to 3.1%)    |
| 20 | Bolivia (Plurinational State of) | Physical violence by sharp object               | 3 (2 to 4)       | 3 (2 to 4)       | -4.7% (-13.6% to 5.4%)    |
| 21 | Bolivia (Plurinational State of) | Poisoning by carbon monoxide                    | 0 (0 to 0)       | 0 (0 to 0)       | 46.4% (25.1% to 70.9%)    |
| 22 | Bolivia (Plurinational State of) | Poisoning by other means                        | 0 (0 to 0)       | 0 (0 to 0)       | -18.2% (-26.1% to -9.9%)  |
| 23 | Bolivia (Plurinational State of) | Pulmonary aspiration and foreign body in airway | 1 (1 to 3)       | 1 (0 to 1)       | -54.6% (-61.6% to -47.2%) |
| 24 | Bolivia (Plurinational State of) | Self-harm by firearm                            | 0 (0 to 0)       | 0 (0 to 0)       | 23.3% (8.8% to 38.2%)     |
| 25 | Bolivia (Plurinational State of) | Self-harm by other specified means              | 0 (0 to 1)       | 1 (0 to 1)       | 13.6% (6.1% to 22.1%)     |
| 26 | Bolivia (Plurinational State of) | Unintentional firearm injuries                  | 5 (3 to 7)       | 3 (2 to 5)       | -29.7% (-37.6% to -22%)   |
| 27 | Bolivia (Plurinational State of) | Venomous animal contact                         | 6 (3 to 11)      | 6 (3 to 10)      | -8.7% (-13.1% to -4.3%)   |
| 28 | Bosnia and Herzegovina           | Adverse effects of medical treatment            | 0 (0 to 0)       | 0 (0 to 0)       | 0% (0% to 0%)             |
| 29 | Bosnia and Herzegovina           | Conflict and terrorism                          | 47 (19 to 109)   | 0 (0 to 0)       | NA                        |
| 30 | Bosnia and Herzegovina           | Cyclist road injuries                           | 68 (49 to 91)    | 66 (48 to 89)    | -2% (-10.6% to 6.3%)      |
| 31 | Bosnia and Herzegovina           | Drowning                                        | 0 (0 to 0)       | 0 (0 to 1)       | 97.3% (71.1% to 126.3%)   |
| 32 | Bosnia and Herzegovina           | Environmental heat and cold exposure            | 2 (1 to 2)       | 2 (1 to 2)       | 6.1% (0.2% to 12.8%)      |
| 33 | Bosnia and Herzegovina           | Executions and police conflict                  | 0 (0 to 0)       | 0 (0 to 0)       | NA                        |
| 34 | Bosnia and Herzegovina           | Exposure to forces of nature                    | 0 (0 to 0)       | 0 (0 to 0)       | NA                        |
| 35 | Bosnia and Herzegovina           | Falls                                           | 188 (144 to 249) | 237 (179 to 316) | 25.7% (20.5% to 30.8%)    |
| 36 | Bosnia and Herzegovina           | Fire, heat, and hot substances                  | 5 (3 to 8)       | 4 (2 to 7)       | -19% (-24.1% to -14.3%)   |
| 37 | Bosnia and Herzegovina           | Foreign body in eyes                            | 0 (0 to 0)       | 0 (0 to 0)       | 0% (-0.2% to 0.5%)        |
| 38 | Bosnia and Herzegovina           | Foreign body in other body part                 | 3 (1 to 5)       | 2 (1 to 5)       | -4.7% (-9.1% to 0.6%)     |
| 39 | Bosnia and Herzegovina           | Motor vehicle road injuries                     | 69 (51 to 90)    | 83 (62 to 106)   | 20.9% (10.6% to 31.5%)    |
| 40 | Bosnia and Herzegovina           | Motorcyclist road injuries                      | 12 (9 to 17)     | 13 (10 to 18)    | 7.8% (-5.2% to 22.3%)     |
| 41 | Bosnia and Herzegovina           | Non-venomous animal contact                     | 8 (5 to 15)      | 6 (3 to 10)      | -30.2% (-34.6% to -24.7%) |
| 42 | Bosnia and Herzegovina           | Other exposure to mechanical forces             | 149 (92 to 236)  | 137 (84 to 216)  | -8% (-13.9% to -1.7%)     |
| 43 | Bosnia and Herzegovina           | Other road injuries                             | 2 (1 to 3)       | 2 (1 to 3)       | -7.5% (-15.7% to 2%)      |
| 44 | Bosnia and Herzegovina           | Other transport injuries                        | 7 (5 to 9)       | 6 (4 to 8)       | -7.5% (-12.3% to -3.6%)   |
| 45 |                                  |                                                 |                  |                  |                           |
| 46 |                                  |                                                 |                  |                  |                           |

|    |                        |                                                 |               |               |                           |
|----|------------------------|-------------------------------------------------|---------------|---------------|---------------------------|
| 1  |                        |                                                 |               |               |                           |
| 2  | Bosnia and Herzegovina | Other unintentional injuries                    | 34 (21 to 56) | 30 (19 to 50) | -10.4% (-15.8% to -5.6%)  |
| 3  | Bosnia and Herzegovina | Pedestrian road injuries                        | 35 (26 to 45) | 33 (24 to 43) | -6.2% (-13.2% to 1.7%)    |
| 4  | Bosnia and Herzegovina | Physical violence by firearm                    | 0 (0 to 0)    | 0 (0 to 1)    | 127.3% (104% to 155%)     |
| 5  | Bosnia and Herzegovina | Physical violence by other means                | 37 (26 to 52) | 30 (22 to 43) | -17.5% (-23.1% to -11.6%) |
| 6  | Bosnia and Herzegovina | Physical violence by sharp object               | 2 (1 to 3)    | 2 (1 to 3)    | 3.8% (-5.8% to 14.8%)     |
| 7  | Bosnia and Herzegovina | Poisoning by carbon monoxide                    | 0 (0 to 0)    | 0 (0 to 0)    | -10% (-26.7% to 10.4%)    |
| 8  | Bosnia and Herzegovina | Poisoning by other means                        | 1 (1 to 1)    | 0 (0 to 1)    | -47% (-57.1% to -35.3%)   |
| 9  | Bosnia and Herzegovina | Pulmonary aspiration and foreign body in airway | 1 (1 to 2)    | 1 (1 to 2)    | -15.2% (-22.8% to -6.7%)  |
| 10 | Bosnia and Herzegovina | Self-harm by firearm                            | 0 (0 to 1)    | 0 (0 to 1)    | 32.3% (16% to 49.3%)      |
| 11 | Bosnia and Herzegovina | Self-harm by other specified means              | 2 (1 to 3)    | 2 (1 to 3)    | -1.6% (-7.2% to 3.8%)     |
| 12 | Bosnia and Herzegovina | Unintentional firearm injuries                  | 1 (1 to 2)    | 1 (1 to 2)    | -19.8% (-28% to -11.4%)   |
| 13 | Bosnia and Herzegovina | Venomous animal contact                         | 7 (3 to 13)   | 5 (2 to 9)    | -31.3% (-35.5% to -26.5%) |
| 14 | Botswana               | Adverse effects of medical treatment            | 0 (0 to 0)    | 0 (0 to 0)    | 0% (0% to 0%)             |
| 15 | Botswana               | Conflict and terrorism                          | 2 (1 to 6)    | 0 (0 to 0)    | NA                        |
| 16 | Botswana               | Cyclist road injuries                           | 12 (7 to 19)  | 16 (10 to 24) | 26.7% (18% to 36.8%)      |
| 17 | Botswana               | Drowning                                        | 0 (0 to 0)    | 0 (0 to 0)    | -0.1% (-9.4% to 11%)      |
| 18 | Botswana               | Environmental heat and cold exposure            | 0 (0 to 1)    | 0 (0 to 1)    | -10% (-16.5% to -3.7%)    |
| 19 | Botswana               | Executions and police conflict                  | 0 (0 to 0)    | 0 (0 to 0)    | NA                        |
| 20 | Botswana               | Exposure to forces of nature                    | 0 (0 to 0)    | 0 (0 to 0)    | NA                        |
| 21 | Botswana               | Falls                                           | 23 (15 to 36) | 26 (16 to 40) | 11.9% (7.5% to 16.6%)     |
| 22 | Botswana               | Fire, heat, and hot substances                  | 0 (0 to 0)    | 0 (0 to 0)    | -7.8% (-13.2% to -1.1%)   |
| 23 | Botswana               | Foreign body in eyes                            | 0 (0 to 0)    | 0 (0 to 0)    | 0.4% (-0.1% to 1.3%)      |
| 24 | Botswana               | Foreign body in other body part                 | 4 (2 to 9)    | 4 (2 to 9)    | -3.9% (-9.8% to 2.4%)     |
| 25 | Botswana               | Motor vehicle road injuries                     | 31 (21 to 43) | 41 (28 to 56) | 32.8% (22.6% to 42.9%)    |
| 26 | Botswana               | Motorcyclist road injuries                      | 8 (6 to 11)   | 8 (6 to 12)   | 4.2% (-6.1% to 14.2%)     |
| 27 | Botswana               | Non-venomous animal contact                     | 4 (2 to 8)    | 3 (1 to 6)    | -23.5% (-27.5% to -19.6%) |
| 28 | Botswana               | Other exposure to mechanical forces             | 32 (16 to 59) | 28 (14 to 51) | -13.1% (-18.8% to -7.9%)  |
| 29 | Botswana               | Other road injuries                             | 1 (1 to 3)    | 2 (1 to 4)    | 29.8% (18.2% to 42.9%)    |
| 30 | Botswana               | Other transport injuries                        | 3 (2 to 5)    | 3 (2 to 5)    | -7.9% (-13.1% to -1.5%)   |
| 31 | Botswana               | Other unintentional injuries                    | 3 (2 to 5)    | 2 (1 to 4)    | -17.6% (-22.2% to -12.3%) |
| 32 | Botswana               | Pedestrian road injuries                        | 38 (28 to 50) | 43 (31 to 56) | 12.2% (4.4% to 19.6%)     |
| 33 | Botswana               | Physical violence by firearm                    | 0 (0 to 0)    | 1 (0 to 1)    | 266.9% (208.3% to 348.8%) |
| 34 | Botswana               | Physical violence by other means                | 6 (4 to 10)   | 17 (11 to 26) | 157.5% (125.5% to 198.5%) |
| 35 | Botswana               | Physical violence by sharp object               | 2 (1 to 4)    | 5 (3 to 10)   | 153.7% (116.2% to 205.7%) |
| 36 | Botswana               | Poisoning by carbon monoxide                    | 0 (0 to 0)    | 0 (0 to 0)    | 14.2% (2.5% to 26.5%)     |
| 37 | Botswana               | Poisoning by other means                        | 0 (0 to 0)    | 0 (0 to 0)    | -21.2% (-28.9% to -13.5%) |
| 38 | Botswana               | Pulmonary aspiration and foreign body in airway | 0 (0 to 0)    | 0 (0 to 0)    | -15.3% (-22.5% to -8.3%)  |
| 39 | Botswana               | Self-harm by firearm                            | 0 (0 to 0)    | 0 (0 to 0)    | 25.3% (15.9% to 35.8%)    |
| 40 | Botswana               | Self-harm by other specified means              | 0 (0 to 0)    | 0 (0 to 0)    | 17.9% (10.7% to 25.1%)    |
| 41 | Botswana               | Unintentional firearm injuries                  | 1 (0 to 1)    | 0 (0 to 1)    | -15.7% (-24.4% to -6.3%)  |
| 42 | Botswana               | Venomous animal contact                         | 0 (0 to 1)    | 0 (0 to 1)    | -24.6% (-31.4% to -17.7%) |
| 43 | Brazil                 | Adverse effects of medical treatment            | 0 (0 to 0)    | 0 (0 to 0)    | 0% (0% to 0%)             |
| 44 | Brazil                 | Conflict and terrorism                          | 0 (0 to 0)    | 0 (0 to 0)    | NA                        |
| 45 |                        |                                                 |               |               |                           |
| 46 |                        |                                                 |               |               |                           |

|    |                   |                                                 |                  |                  |                           |
|----|-------------------|-------------------------------------------------|------------------|------------------|---------------------------|
| 1  |                   |                                                 |                  |                  |                           |
| 2  | Brazil            | Cyclist road injuries                           | 9 (5 to 15)      | 6 (4 to 11)      | -33.1% (-42% to -22.6%)   |
| 3  | Brazil            | Drowning                                        | 0 (0 to 0)       | 0 (0 to 0)       | -41% (-44.7% to -37.2%)   |
| 4  | Brazil            | Environmental heat and cold exposure            | 2 (1 to 4)       | 2 (1 to 4)       | -0.6% (-7.4% to 7.2%)     |
| 5  | Brazil            | Executions and police conflict                  | 0 (0 to 0)       | 0 (0 to 0)       | NA                        |
| 6  | Brazil            | Exposure to forces of nature                    | 0 (0 to 0)       | 0 (0 to 0)       | NA                        |
| 7  | Brazil            | Falls                                           | 83 (52 to 128)   | 78 (49 to 119)   | -5.9% (-7.9% to -3.9%)    |
| 8  | Brazil            | Fire, heat, and hot substances                  | 1 (0 to 1)       | 0 (0 to 1)       | -53.1% (-55.5% to -50.5%) |
| 9  | Brazil            | Foreign body in eyes                            | 0 (0 to 0)       | 0 (0 to 0)       | -0.2% (-0.5% to 0%)       |
| 10 | Brazil            | Foreign body in other body part                 | 1 (0 to 2)       | 0 (0 to 1)       | -60.8% (-65.2% to -51.6%) |
| 11 | Brazil            | Motor vehicle road injuries                     | 16 (10 to 24)    | 8 (5 to 13)      | -49% (-57% to -40.8%)     |
| 12 | Brazil            | Motorcyclist road injuries                      | 17 (12 to 25)    | 41 (30 to 55)    | 136.3% (106% to 172.3%)   |
| 13 | Brazil            | Non-venomous animal contact                     | 2 (1 to 5)       | 1 (0 to 2)       | -53.9% (-57.1% to -49.5%) |
| 14 | Brazil            | Other exposure to mechanical forces             | 42 (21 to 78)    | 31 (15 to 57)    | -25.4% (-28.2% to -21.9%) |
| 15 | Brazil            | Other road injuries                             | 4 (2 to 7)       | 6 (3 to 10)      | 42.4% (25.3% to 63.1%)    |
| 16 | Brazil            | Other transport injuries                        | 3 (2 to 4)       | 1 (1 to 2)       | -53% (-55.3% to -50.6%)   |
| 17 | Brazil            | Other unintentional injuries                    | 8 (5 to 15)      | 6 (4 to 11)      | -27.7% (-30.4% to -24.5%) |
| 18 | Brazil            | Pedestrian road injuries                        | 39 (29 to 52)    | 22 (15 to 31)    | -43.9% (-51.2% to -36.8%) |
| 19 | Brazil            | Physical violence by firearm                    | 3 (2 to 5)       | 5 (3 to 9)       | 92.2% (65.2% to 127.5%)   |
| 20 | Brazil            | Physical violence by other means                | 20 (13 to 31)    | 15 (9 to 24)     | -27% (-34.3% to -21.2%)   |
| 21 | Brazil            | Physical violence by sharp object               | 5 (2 to 9)       | 3 (1 to 6)       | -36.1% (-44.1% to -28.6%) |
| 22 | Brazil            | Poisoning by carbon monoxide                    | 0 (0 to 0)       | 0 (0 to 0)       | -31.3% (-42.3% to -11.6%) |
| 23 | Brazil            | Poisoning by other means                        | 0 (0 to 0)       | 0 (0 to 0)       | -46.6% (-52.3% to -39.4%) |
| 24 | Brazil            | Pulmonary aspiration and foreign body in airway | 0 (0 to 0)       | 0 (0 to 0)       | -48.5% (-54.1% to -43.8%) |
| 25 | Brazil            | Self-harm by firearm                            | 0 (0 to 0)       | 0 (0 to 0)       | 4.6% (-4.5% to 17.9%)     |
| 26 | Brazil            | Self-harm by other specified means              | 0 (0 to 0)       | 0 (0 to 0)       | -37.6% (-47.5% to -30.1%) |
| 27 | Brazil            | Unintentional firearm injuries                  | 2 (1 to 4)       | 1 (0 to 2)       | -56.6% (-60.3% to -52.2%) |
| 28 | Brazil            | Venomous animal contact                         | 3 (1 to 6)       | 1 (0 to 3)       | -53.4% (-56.6% to -48.6%) |
| 29 | Brunei Darussalam | Adverse effects of medical treatment            | 0 (0 to 0)       | 0 (0 to 0)       | 0% (0% to 0%)             |
| 30 | Brunei Darussalam | Conflict and terrorism                          | 0 (0 to 0)       | 0 (0 to 0)       | NA                        |
| 31 | Brunei Darussalam | Cyclist road injuries                           | 31 (21 to 42)    | 22 (16 to 30)    | -28.2% (-34.3% to -21.3%) |
| 32 | Brunei Darussalam | Drowning                                        | 0 (0 to 1)       | 1 (0 to 1)       | 28.3% (16.8% to 40.6%)    |
| 33 | Brunei Darussalam | Environmental heat and cold exposure            | 4 (3 to 6)       | 5 (3 to 7)       | 4.8% (0.5% to 9.4%)       |
| 34 | Brunei Darussalam | Executions and police conflict                  | 0 (0 to 0)       | 0 (0 to 0)       | NA                        |
| 35 | Brunei Darussalam | Exposure to forces of nature                    | 0 (0 to 0)       | 0 (0 to 0)       | NA                        |
| 36 | Brunei Darussalam | Falls                                           | 168 (131 to 217) | 179 (141 to 228) | 6.6% (2.9% to 10.8%)      |
| 37 | Brunei Darussalam | Fire, heat, and hot substances                  | 4 (2 to 6)       | 3 (2 to 5)       | -26% (-31.5% to -20.6%)   |
| 38 | Brunei Darussalam | Foreign body in eyes                            | 0 (0 to 0)       | 0 (0 to 0)       | -0.4% (-1% to -0.1%)      |
| 39 | Brunei Darussalam | Foreign body in other body part                 | 3 (1 to 5)       | 3 (2 to 6)       | 16.2% (8.4% to 25.9%)     |
| 40 | Brunei Darussalam | Motor vehicle road injuries                     | 67 (51 to 84)    | 34 (26 to 44)    | -48.5% (-52.6% to -44.3%) |
| 41 | Brunei Darussalam | Motorcyclist road injuries                      | 20 (15 to 26)    | 13 (10 to 17)    | -32.1% (-40% to -23.9%)   |
| 42 | Brunei Darussalam | Non-venomous animal contact                     | 5 (3 to 9)       | 4 (2 to 8)       | -9.8% (-14.3% to -5.3%)   |
| 43 | Brunei Darussalam | Other exposure to mechanical forces             | 73 (45 to 114)   | 68 (42 to 106)   | -7.1% (-11.6% to -2.4%)   |
| 44 | Brunei Darussalam | Other road injuries                             | 2 (1 to 3)       | 1 (1 to 2)       | -34.3% (-40.8% to -27.3%) |
| 45 |                   |                                                 |                  |                  |                           |
| 46 |                   |                                                 |                  |                  |                           |

|    |                   |                                                 |                  |                  |                           |
|----|-------------------|-------------------------------------------------|------------------|------------------|---------------------------|
| 1  |                   |                                                 |                  |                  |                           |
| 2  | Brunei Darussalam | Other transport injuries                        | 9 (7 to 11)      | 5 (4 to 7)       | -42.1% (-47.8% to -34.6%) |
| 3  | Brunei Darussalam | Other unintentional injuries                    | 36 (24 to 57)    | 29 (19 to 46)    | -20.5% (-26% to -15.3%)   |
| 4  | Brunei Darussalam | Pedestrian road injuries                        | 17 (13 to 22)    | 13 (9 to 16)     | -27.4% (-33.5% to -20.7%) |
| 5  | Brunei Darussalam | Physical violence by firearm                    | 0 (0 to 0)       | 0 (0 to 1)       | 75.1% (50.9% to 103.8%)   |
| 6  | Brunei Darussalam | Physical violence by other means                | 17 (12 to 24)    | 13 (9 to 19)     | -22.1% (-27.9% to -15.4%) |
| 7  | Brunei Darussalam | Physical violence by sharp object               | 1 (1 to 2)       | 1 (1 to 2)       | -19.3% (-30.7% to -8%)    |
| 8  | Brunei Darussalam | Poisoning by carbon monoxide                    | 0 (0 to 0)       | 0 (0 to 0)       | -1.7% (-11% to 9.1%)      |
| 9  | Brunei Darussalam | Poisoning by other means                        | 0 (0 to 1)       | 0 (0 to 0)       | -20% (-26.1% to -13%)     |
| 10 | Brunei Darussalam | Pulmonary aspiration and foreign body in airway | 0 (0 to 1)       | 1 (0 to 1)       | 1.5% (-5.9% to 9.2%)      |
| 11 | Brunei Darussalam | Self-harm by firearm                            | 0 (0 to 0)       | 0 (0 to 0)       | -0.1% (-15.9% to 15.3%)   |
| 12 | Brunei Darussalam | Self-harm by other specified means              | 1 (1 to 2)       | 1 (1 to 2)       | 5.7% (-1.4% to 12.9%)     |
| 13 | Brunei Darussalam | Unintentional firearm injuries                  | 1 (1 to 2)       | 1 (1 to 2)       | -5% (-13.4% to 3.2%)      |
| 14 | Brunei Darussalam | Venomous animal contact                         | 2 (1 to 4)       | 2 (1 to 4)       | -6.7% (-11.8% to -0.8%)   |
| 15 | Bulgaria          | Adverse effects of medical treatment            | 0 (0 to 0)       | 0 (0 to 0)       | 0% (0% to 0%)             |
| 16 | Bulgaria          | Conflict and terrorism                          | 0 (0 to 0)       | 0 (0 to 0)       | NA                        |
| 17 | Bulgaria          | Cyclist road injuries                           | 64 (46 to 86)    | 58 (41 to 79)    | -9.7% (-19.8% to 2%)      |
| 18 | Bulgaria          | Drowning                                        | 0 (0 to 0)       | 0 (0 to 1)       | 25% (9.5% to 39.4%)       |
| 19 | Bulgaria          | Environmental heat and cold exposure            | 3 (2 to 4)       | 2 (2 to 3)       | -11.5% (-15.7% to -6.8%)  |
| 20 | Bulgaria          | Executions and police conflict                  | 0 (0 to 0)       | 0 (0 to 0)       | NA                        |
| 21 | Bulgaria          | Exposure to forces of nature                    | 0 (0 to 0)       | 0 (0 to 0)       | NA                        |
| 22 | Bulgaria          | Falls                                           | 255 (195 to 333) | 250 (190 to 333) | -2.1% (-7.4% to 2.9%)     |
| 23 | Bulgaria          | Fire, heat, and hot substances                  | 4 (2 to 6)       | 4 (2 to 6)       | -7.1% (-13.3% to -1.2%)   |
| 24 | Bulgaria          | Foreign body in eyes                            | 0 (0 to 0)       | 0 (0 to 0)       | 0.2% (-0.1% to 0.6%)      |
| 25 | Bulgaria          | Foreign body in other body part                 | 3 (1 to 5)       | 2 (1 to 5)       | -1.6% (-7.6% to 4.4%)     |
| 26 | Bulgaria          | Motor vehicle road injuries                     | 114 (88 to 145)  | 112 (87 to 143)  | -1.7% (-14.8% to 12.2%)   |
| 27 | Bulgaria          | Motorcyclist road injuries                      | 22 (16 to 28)    | 18 (13 to 24)    | -16.1% (-29.1% to -1.5%)  |
| 28 | Bulgaria          | Non-venomous animal contact                     | 6 (3 to 11)      | 5 (3 to 10)      | -11% (-15.3% to -6.5%)    |
| 29 | Bulgaria          | Other exposure to mechanical forces             | 148 (93 to 230)  | 158 (99 to 243)  | 6.2% (0.6% to 12.1%)      |
| 30 | Bulgaria          | Other road injuries                             | 2 (1 to 3)       | 1 (1 to 2)       | -12.6% (-23.1% to -0.5%)  |
| 31 | Bulgaria          | Other transport injuries                        | 9 (7 to 12)      | 7 (5 to 9)       | -23.3% (-29.1% to -17.2%) |
| 32 | Bulgaria          | Other unintentional injuries                    | 59 (39 to 92)    | 30 (19 to 49)    | -48.9% (-55.5% to -41.6%) |
| 33 | Bulgaria          | Pedestrian road injuries                        | 53 (41 to 67)    | 26 (19 to 34)    | -51.6% (-58.3% to -44.6%) |
| 34 | Bulgaria          | Physical violence by firearm                    | 0 (0 to 1)       | 0 (0 to 1)       | -12.9% (-30.1% to 5.5%)   |
| 35 | Bulgaria          | Physical violence by other means                | 41 (30 to 56)    | 26 (18 to 36)    | -36.2% (-44.7% to -27.4%) |
| 36 | Bulgaria          | Physical violence by sharp object               | 3 (2 to 6)       | 2 (1 to 3)       | -45% (-55.7% to -34.1%)   |
| 37 | Bulgaria          | Poisoning by carbon monoxide                    | 0 (0 to 0)       | 0 (0 to 0)       | 25.6% (8.5% to 41.9%)     |
| 38 | Bulgaria          | Poisoning by other means                        | 0 (0 to 1)       | 0 (0 to 1)       | -6.8% (-17.8% to 4.2%)    |
| 39 | Bulgaria          | Pulmonary aspiration and foreign body in airway | 1 (1 to 2)       | 1 (0 to 2)       | -25.5% (-34.4% to -17.4%) |
| 40 | Bulgaria          | Self-harm by firearm                            | 1 (0 to 1)       | 1 (0 to 1)       | -11.7% (-23.4% to 2%)     |
| 41 | Bulgaria          | Self-harm by other specified means              | 4 (2 to 6)       | 2 (1 to 3)       | -37.3% (-41.5% to -33%)   |
| 42 | Bulgaria          | Unintentional firearm injuries                  | 1 (1 to 2)       | 1 (1 to 2)       | -7.8% (-16.5% to 1.1%)    |
| 43 | Bulgaria          | Venomous animal contact                         | 5 (2 to 10)      | 4 (2 to 8)       | -12.4% (-16.8% to -7.7%)  |
| 44 | Burkina Faso      | Adverse effects of medical treatment            | 0 (0 to 0)       | 0 (0 to 0)       | 0% (0% to 0%)             |
| 45 |                   |                                                 |                  |                  |                           |
| 46 |                   |                                                 |                  |                  |                           |



|    |              |                                                 |               |               |                           |
|----|--------------|-------------------------------------------------|---------------|---------------|---------------------------|
| 1  |              |                                                 |               |               |                           |
| 2  | Burkina Faso | Conflict and terrorism                          | 0 (0 to 0)    | 14 (4 to 36)  | NA                        |
| 3  | Burkina Faso | Cyclist road injuries                           | 28 (18 to 41) | 36 (24 to 54) | 31% (21.5% to 41.1%)      |
| 4  | Burkina Faso | Drowning                                        | 0 (0 to 0)    | 0 (0 to 0)    | -6.5% (-12.8% to 1%)      |
| 5  | Burkina Faso | Environmental heat and cold exposure            | 0 (0 to 1)    | 0 (0 to 1)    | 2.5% (-2.5% to 8%)        |
| 6  | Burkina Faso | Executions and police conflict                  | 0 (0 to 0)    | 5 (2 to 11)   | NA                        |
| 7  | Burkina Faso | Exposure to forces of nature                    | 0 (0 to 0)    | 0 (0 to 0)    | NA                        |
| 8  | Burkina Faso | Falls                                           | 18 (12 to 26) | 21 (14 to 31) | 17.7% (14% to 21.8%)      |
| 9  | Burkina Faso | Fire, heat, and hot substances                  | 0 (0 to 0)    | 0 (0 to 0)    | -2.2% (-8.1% to 3.3%)     |
| 10 | Burkina Faso | Foreign body in eyes                            | 0 (0 to 0)    | 0 (0 to 0)    | -0.1% (-0.6% to 0.3%)     |
| 11 | Burkina Faso | Foreign body in other body part                 | 3 (1 to 7)    | 3 (1 to 7)    | -1.9% (-6% to 2.4%)       |
| 12 | Burkina Faso | Motor vehicle road injuries                     | 41 (28 to 59) | 49 (33 to 69) | 18.3% (9.2% to 27.9%)     |
| 13 | Burkina Faso | Motorcyclist road injuries                      | 31 (22 to 43) | 43 (31 to 59) | 37.6% (28.2% to 48%)      |
| 14 | Burkina Faso | Non-venomous animal contact                     | 3 (1 to 6)    | 3 (1 to 5)    | -1.2% (-16.2% to -8%)     |
| 15 | Burkina Faso | Other exposure to mechanical forces             | 21 (10 to 38) | 21 (10 to 38) | -1% (-6.4% to 5.3%)       |
| 16 | Burkina Faso | Other road injuries                             | 2 (1 to 4)    | 2 (1 to 4)    | 8.5% (-0.3% to 18.1%)     |
| 17 | Burkina Faso | Other transport injuries                        | 3 (2 to 4)    | 3 (2 to 4)    | -6.3% (-11.6% to -0.2%)   |
| 18 | Burkina Faso | Other unintentional injuries                    | 3 (2 to 4)    | 2 (1 to 4)    | -8.9% (-13.1% to -3.8%)   |
| 19 | Burkina Faso | Pedestrian road injuries                        | 52 (38 to 69) | 56 (40 to 74) | 5.9% (-1% to 13.3%)       |
| 20 | Burkina Faso | Physical violence by firearm                    | 0 (0 to 0)    | 0 (0 to 1)    | 25.4% (11% to 42.3%)      |
| 21 | Burkina Faso | Physical violence by other means                | 9 (6 to 14)   | 10 (6 to 14)  | 5.5% (0.4% to 10.9%)      |
| 22 | Burkina Faso | Physical violence by sharp object               | 3 (1 to 5)    | 3 (1 to 5)    | 4.3% (-2.3% to 11.7%)     |
| 23 | Burkina Faso | Poisoning by carbon monoxide                    | 0 (0 to 0)    | 0 (0 to 0)    | 5.1% (-4% to 15.4%)       |
| 24 | Burkina Faso | Poisoning by other means                        | 0 (0 to 0)    | 0 (0 to 0)    | -10.4% (-16.8% to -3.4%)  |
| 25 | Burkina Faso | Pulmonary aspiration and foreign body in airway | 0 (0 to 0)    | 0 (0 to 0)    | -8.7% (-17.6% to -0.3%)   |
| 26 | Burkina Faso | Self-harm by firearm                            | 0 (0 to 0)    | 0 (0 to 0)    | 19.2% (11.7% to 28.5%)    |
| 27 | Burkina Faso | Self-harm by other specified means              | 0 (0 to 0)    | 0 (0 to 0)    | 12.2% (6.4% to 18.2%)     |
| 28 | Burkina Faso | Unintentional firearm injuries                  | 1 (0 to 2)    | 1 (0 to 2)    | -10% (-17.6% to -2.4%)    |
| 29 | Burkina Faso | Venomous animal contact                         | 0 (0 to 1)    | 0 (0 to 1)    | -11.7% (-17.5% to -5.1%)  |
| 30 | Burundi      | Adverse effects of medical treatment            | 0 (0 to 0)    | 0 (0 to 0)    | 0% (0% to 0%)             |
| 31 | Burundi      | Conflict and terrorism                          | 1 (0 to 2)    | 4 (2 to 9)    | NA                        |
| 32 | Burundi      | Cyclist road injuries                           | 67 (50 to 87) | 54 (40 to 70) | -19.5% (-25.5% to -13.7%) |
| 33 | Burundi      | Drowning                                        | 0 (0 to 0)    | 0 (0 to 0)    | -24% (-29.6% to -17.8%)   |
| 34 | Burundi      | Environmental heat and cold exposure            | 2 (2 to 3)    | 2 (1 to 3)    | -11.2% (-16.8% to -5.6%)  |
| 35 | Burundi      | Executions and police conflict                  | 0 (0 to 0)    | 1 (0 to 2)    | NA                        |
| 36 | Burundi      | Exposure to forces of nature                    | 0 (0 to 0)    | 0 (0 to 0)    | NA                        |
| 37 | Burundi      | Falls                                           | 50 (39 to 64) | 53 (41 to 69) | 6.4% (1.3% to 11.6%)      |
| 38 | Burundi      | Fire, heat, and hot substances                  | 2 (1 to 4)    | 2 (1 to 3)    | -18.1% (-23.9% to -12.9%) |
| 39 | Burundi      | Foreign body in eyes                            | 0 (0 to 0)    | 0 (0 to 0)    | 2.3% (1.1% to 4.2%)       |
| 40 | Burundi      | Foreign body in other body part                 | 3 (1 to 5)    | 3 (1 to 5)    | 3.3% (-2.8% to 9.1%)      |
| 41 | Burundi      | Motor vehicle road injuries                     | 42 (32 to 55) | 40 (29 to 52) | -5.1% (-12.5% to 2.9%)    |
| 42 | Burundi      | Motorcyclist road injuries                      | 15 (12 to 20) | 14 (11 to 19) | -6.2% (-13.1% to 1.7%)    |
| 43 | Burundi      | Non-venomous animal contact                     | 11 (6 to 18)  | 10 (6 to 17)  | -7.3% (-12.5% to -2%)     |
| 44 | Burundi      | Other exposure to mechanical forces             | 17 (10 to 29) | 16 (10 to 27) | -6.1% (-12.4% to -0.4%)   |
| 45 |              |                                                 |               |               |                           |
| 46 |              |                                                 |               |               |                           |

|    |            |                                                 |               |               |                           |
|----|------------|-------------------------------------------------|---------------|---------------|---------------------------|
| 1  |            |                                                 |               |               |                           |
| 2  | Burundi    | Other road injuries                             | 1 (1 to 2)    | 1 (1 to 2)    | 16.8% (6.9% to 27.8%)     |
| 3  | Burundi    | Other transport injuries                        | 6 (5 to 8)    | 6 (4 to 7)    | -8.6% (-14.4% to -1.8%)   |
| 4  | Burundi    | Other unintentional injuries                    | 9 (6 to 14)   | 7 (5 to 11)   | -22% (-26.8% to -17%)     |
| 5  | Burundi    | Pedestrian road injuries                        | 63 (49 to 79) | 55 (42 to 68) | -13.4% (-19% to -7.2%)    |
| 6  | Burundi    | Physical violence by firearm                    | 0 (0 to 0)    | 0 (0 to 0)    | 22.1% (10.2% to 36.8%)    |
| 7  | Burundi    | Physical violence by other means                | 4 (2 to 5)    | 4 (2 to 5)    | 1.6% (-3.6% to 8%)        |
| 8  | Burundi    | Physical violence by sharp object               | 1 (1 to 2)    | 1 (1 to 2)    | 0.9% (-5.4% to 8.3%)      |
| 9  | Burundi    | Poisoning by carbon monoxide                    | 0 (0 to 0)    | 0 (0 to 0)    | 7.2% (-2.9% to 19.3%)     |
| 10 | Burundi    | Poisoning by other means                        | 0 (0 to 0)    | 0 (0 to 0)    | -23% (-29.3% to -16.2%)   |
| 11 | Burundi    | Pulmonary aspiration and foreign body in airway | 0 (0 to 1)    | 0 (0 to 1)    | -5.4% (-15.6% to 8.2%)    |
| 12 | Burundi    | Self-harm by firearm                            | 0 (0 to 0)    | 0 (0 to 0)    | -0.9% (-13.1% to 15.3%)   |
| 13 | Burundi    | Self-harm by other specified means              | 1 (1 to 2)    | 1 (1 to 2)    | -26.1% (-29.8% to -22.4%) |
| 14 | Burundi    | Unintentional firearm injuries                  | 2 (1 to 3)    | 2 (1 to 3)    | -13.4% (-21.1% to -5.9%)  |
| 15 | Burundi    | Venomous animal contact                         | 4 (2 to 9)    | 4 (1 to 8)    | -15.3% (-22.5% to -8.3%)  |
| 16 | Cabo Verde | Adverse effects of medical treatment            | 0 (0 to 0)    | 0 (0 to 0)    | 0% (0% to 0%)             |
| 17 | Cabo Verde | Conflict and terrorism                          | 0 (0 to 0)    | 0 (0 to 0)    | NA                        |
| 18 | Cabo Verde | Cyclist road injuries                           | 24 (15 to 36) | 27 (17 to 40) | 11.4% (3.3% to 20%)       |
| 19 | Cabo Verde | Drowning                                        | 0 (0 to 0)    | 0 (0 to 0)    | 55.3% (41.9% to 67.8%)    |
| 20 | Cabo Verde | Environmental heat and cold exposure            | 0 (0 to 1)    | 0 (0 to 1)    | 7.2% (1.2% to 14.1%)      |
| 21 | Cabo Verde | Executions and police conflict                  | 0 (0 to 0)    | 0 (0 to 0)    | NA                        |
| 22 | Cabo Verde | Exposure to forces of nature                    | 0 (0 to 0)    | 0 (0 to 0)    | NA                        |
| 23 | Cabo Verde | Falls                                           | 18 (12 to 28) | 26 (17 to 38) | 42% (36.7% to 47.9%)      |
| 24 | Cabo Verde | Fire, heat, and hot substances                  | 0 (0 to 0)    | 0 (0 to 0)    | 9.2% (2.9% to 15.5%)      |
| 25 | Cabo Verde | Foreign body in eyes                            | 0 (0 to 0)    | 0 (0 to 0)    | 2.1% (0.1% to 5.5%)       |
| 26 | Cabo Verde | Foreign body in other body part                 | 4 (2 to 8)    | 4 (2 to 8)    | -1.7% (-6.7% to 3.3%)     |
| 27 | Cabo Verde | Motor vehicle road injuries                     | 25 (17 to 36) | 35 (24 to 50) | 39.9% (28.7% to 52.7%)    |
| 28 | Cabo Verde | Motorcyclist road injuries                      | 16 (11 to 23) | 20 (14 to 29) | 24.2% (15.2% to 34.2%)    |
| 29 | Cabo Verde | Non-venomous animal contact                     | 3 (1 to 6)    | 2 (1 to 5)    | -13.7% (-20.1% to -6.5%)  |
| 30 | Cabo Verde | Other exposure to mechanical forces             | 27 (13 to 50) | 26 (13 to 47) | -4.6% (-9.7% to 0.6%)     |
| 31 | Cabo Verde | Other road injuries                             | 2 (1 to 5)    | 2 (1 to 5)    | 1.6% (-7.3% to 10.9%)     |
| 32 | Cabo Verde | Other transport injuries                        | 3 (2 to 4)    | 3 (2 to 4)    | 5% (-0.8% to 11.7%)       |
| 33 | Cabo Verde | Other unintentional injuries                    | 4 (2 to 6)    | 3 (2 to 6)    | -11.1% (-16.5% to -6.1%)  |
| 34 | Cabo Verde | Pedestrian road injuries                        | 37 (27 to 49) | 47 (34 to 62) | 28.1% (19.2% to 37.2%)    |
| 35 | Cabo Verde | Physical violence by firearm                    | 0 (0 to 1)    | 1 (0 to 1)    | 110.8% (89.6% to 138.5%)  |
| 36 | Cabo Verde | Physical violence by other means                | 14 (9 to 22)  | 16 (11 to 24) | 12.1% (4.8% to 20.5%)     |
| 37 | Cabo Verde | Physical violence by sharp object               | 3 (2 to 6)    | 4 (2 to 7)    | 16.1% (7.6% to 27%)       |
| 38 | Cabo Verde | Poisoning by carbon monoxide                    | 0 (0 to 0)    | 0 (0 to 0)    | 20.4% (10.2% to 32.6%)    |
| 39 | Cabo Verde | Poisoning by other means                        | 0 (0 to 0)    | 0 (0 to 0)    | -6% (-11.5% to -0.3%)     |
| 40 | Cabo Verde | Pulmonary aspiration and foreign body in airway | 0 (0 to 0)    | 0 (0 to 0)    | -21.1% (-29.1% to -13.4%) |
| 41 | Cabo Verde | Self-harm by firearm                            | 0 (0 to 0)    | 0 (0 to 0)    | 48.3% (35.1% to 61.8%)    |
| 42 | Cabo Verde | Self-harm by other specified means              | 0 (0 to 0)    | 0 (0 to 0)    | 37.9% (27.2% to 50.4%)    |
| 43 | Cabo Verde | Unintentional firearm injuries                  | 1 (0 to 2)    | 1 (0 to 2)    | -11.4% (-19.2% to -2.7%)  |
| 44 | Cabo Verde | Venomous animal contact                         | 1 (0 to 1)    | 0 (0 to 1)    | -21.6% (-28.4% to -13.2%) |
| 45 |            |                                                 |               |               |                           |
| 46 |            |                                                 |               |               |                           |

|    |          |                                                 |               |                 |                           |
|----|----------|-------------------------------------------------|---------------|-----------------|---------------------------|
| 1  |          |                                                 |               |                 |                           |
| 2  | Cambodia | Adverse effects of medical treatment            | 0 (0 to 0)    | 0 (0 to 0)      | 0% (0% to 0%)             |
| 3  | Cambodia | Conflict and terrorism                          | 22 (9 to 51)  | 0 (0 to 0)      | NA                        |
| 4  | Cambodia | Cyclist road injuries                           | 16 (11 to 23) | 17 (12 to 24)   | 5.8% (-3.6% to 16.1%)     |
| 5  | Cambodia | Drowning                                        | 1 (0 to 1)    | 0 (0 to 1)      | -31.2% (-36.2% to -24.5%) |
| 6  | Cambodia | Environmental heat and cold exposure            | 2 (1 to 2)    | 2 (1 to 3)      | 5.1% (0.7% to 9.9%)       |
| 7  | Cambodia | Executions and police conflict                  | 0 (0 to 0)    | 0 (0 to 0)      | NA                        |
| 8  | Cambodia | Exposure to forces of nature                    | 0 (0 to 0)    | 0 (0 to 0)      | NA                        |
| 9  | Cambodia | Falls                                           | 71 (57 to 90) | 123 (99 to 155) | 73.5% (67.6% to 79.9%)    |
| 10 | Cambodia | Fire, heat, and hot substances                  | 1 (1 to 2)    | 1 (1 to 2)      | -25.5% (-32% to -18.6%)   |
| 11 | Cambodia | Foreign body in eyes                            | 0 (0 to 0)    | 0 (0 to 0)      | 2.8% (1.6% to 4.3%)       |
| 12 | Cambodia | Foreign body in other body part                 | 1 (0 to 2)    | 1 (0 to 2)      | -0.5% (-5.7% to 5.3%)     |
| 13 | Cambodia | Motor vehicle road injuries                     | 22 (16 to 30) | 21 (15 to 28)   | -5.9% (-13.7% to 3.1%)    |
| 14 | Cambodia | Motorcyclist road injuries                      | 39 (31 to 49) | 39 (31 to 50)   | 1.9% (-7.1% to 11.5%)     |
| 15 | Cambodia | Non-venomous animal contact                     | 6 (4 to 11)   | 5 (3 to 8)      | -26.2% (-31% to -21.2%)   |
| 16 | Cambodia | Other exposure to mechanical forces             | 17 (10 to 28) | 15 (9 to 25)    | -11.4% (-16.6% to -6.1%)  |
| 17 | Cambodia | Other road injuries                             | 1 (1 to 2)    | 1 (1 to 2)      | 6.3% (-5.2% to 18.2%)     |
| 18 | Cambodia | Other transport injuries                        | 5 (4 to 7)    | 5 (4 to 7)      | -11.5% (-18.9% to -2.8%)  |
| 19 | Cambodia | Other unintentional injuries                    | 8 (5 to 13)   | 9 (5 to 14)     | 7.7% (-0.3% to 15.7%)     |
| 20 | Cambodia | Pedestrian road injuries                        | 15 (11 to 19) | 13 (10 to 17)   | -9.8% (-17.3% to -2.3%)   |
| 21 | Cambodia | Physical violence by firearm                    | 0 (0 to 0)    | 0 (0 to 0)      | 22.4% (5.6% to 40.5%)     |
| 22 | Cambodia | Physical violence by other means                | 16 (11 to 22) | 15 (10 to 22)   | -3.3% (-10.4% to 4.2%)    |
| 23 | Cambodia | Physical violence by sharp object               | 3 (2 to 5)    | 3 (2 to 5)      | -5.5% (-16.2% to 5.6%)    |
| 24 | Cambodia | Poisoning by carbon monoxide                    | 0 (0 to 0)    | 0 (0 to 0)      | 44.6% (29% to 62.1%)      |
| 25 | Cambodia | Poisoning by other means                        | 0 (0 to 0)    | 0 (0 to 0)      | -8.1% (-16.3% to -0.6%)   |
| 26 | Cambodia | Pulmonary aspiration and foreign body in airway | 0 (0 to 0)    | 0 (0 to 0)      | -26.1% (-33.3% to -17.3%) |
| 27 | Cambodia | Self-harm by firearm                            | 0 (0 to 0)    | 0 (0 to 0)      | 60.9% (35.4% to 95.3%)    |
| 28 | Cambodia | Self-harm by other specified means              | 1 (1 to 2)    | 1 (1 to 2)      | -9.8% (-15% to -4.2%)     |
| 29 | Cambodia | Unintentional firearm injuries                  | 2 (1 to 3)    | 2 (1 to 3)      | -11.4% (-20% to -2.6%)    |
| 30 | Cambodia | Venomous animal contact                         | 1 (0 to 3)    | 1 (0 to 3)      | -17.1% (-23.3% to -10.2%) |
| 31 | Cameroon | Adverse effects of medical treatment            | 0 (0 to 0)    | 0 (0 to 0)      | 0% (0% to 0%)             |
| 32 | Cameroon | Conflict and terrorism                          | 0 (0 to 1)    | 10 (3 to 24)    | NA                        |
| 33 | Cameroon | Cyclist road injuries                           | 29 (19 to 45) | 36 (23 to 54)   | 23.5% (14.9% to 33.3%)    |
| 34 | Cameroon | Drowning                                        | 0 (0 to 0)    | 0 (0 to 0)      | -6.4% (-13.1% to 0.4%)    |
| 35 | Cameroon | Environmental heat and cold exposure            | 0 (0 to 1)    | 0 (0 to 1)      | -0.5% (-5.6% to 6%)       |
| 36 | Cameroon | Executions and police conflict                  | 0 (0 to 0)    | 1 (0 to 3)      | NA                        |
| 37 | Cameroon | Exposure to forces of nature                    | 0 (0 to 0)    | 0 (0 to 0)      | NA                        |
| 38 | Cameroon | Falls                                           | 19 (12 to 29) | 22 (15 to 33)   | 15.7% (11.6% to 19.7%)    |
| 39 | Cameroon | Fire, heat, and hot substances                  | 0 (0 to 0)    | 0 (0 to 0)      | -6.8% (-11.9% to -0.9%)   |
| 40 | Cameroon | Foreign body in eyes                            | 0 (0 to 0)    | 0 (0 to 0)      | 0.1% (-0.1% to 0.5%)      |
| 41 | Cameroon | Foreign body in other body part                 | 3 (1 to 7)    | 3 (1 to 8)      | 2.2% (-3.3% to 7.8%)      |
| 42 | Cameroon | Motor vehicle road injuries                     | 67 (47 to 93) | 75 (52 to 103)  | 11.7% (3.3% to 20.6%)     |
| 43 | Cameroon | Motorcyclist road injuries                      | 60 (44 to 79) | 61 (45 to 81)   | 2.3% (-4.2% to 9.6%)      |
| 44 | Cameroon | Non-venomous animal contact                     | 2 (1 to 5)    | 3 (1 to 5)      | 0.2% (-4.8% to 5.6%)      |
| 45 |          |                                                 |               |                 |                           |
| 46 |          |                                                 |               |                 |                           |

|    |          |                                                 |                  |                  |                           |
|----|----------|-------------------------------------------------|------------------|------------------|---------------------------|
| 1  |          |                                                 |                  |                  |                           |
| 2  | Cameroon | Other exposure to mechanical forces             | 25 (13 to 45)    | 23 (11 to 43)    | -8.7% (-14.9% to -2.8%)   |
| 3  | Cameroon | Other road injuries                             | 2 (1 to 4)       | 2 (1 to 5)       | 24.3% (13.1% to 36.2%)    |
| 4  | Cameroon | Other transport injuries                        | 3 (2 to 4)       | 3 (2 to 4)       | -3% (-9.2% to 4.2%)       |
| 5  | Cameroon | Other unintentional injuries                    | 3 (2 to 5)       | 2 (1 to 4)       | -10.2% (-15.6% to -4.1%)  |
| 6  | Cameroon | Pedestrian road injuries                        | 38 (27 to 52)    | 40 (28 to 54)    | 5.3% (-2.4% to 13.3%)     |
| 7  | Cameroon | Physical violence by firearm                    | 0 (0 to 0)       | 0 (0 to 0)       | 32.5% (15.4% to 52.1%)    |
| 8  | Cameroon | Physical violence by other means                | 5 (3 to 8)       | 5 (3 to 8)       | -2.9% (-8.2% to 2%)       |
| 9  | Cameroon | Physical violence by sharp object               | 1 (1 to 2)       | 1 (1 to 2)       | 1.3% (-6.2% to 8.8%)      |
| 10 | Cameroon | Poisoning by carbon monoxide                    | 0 (0 to 0)       | 0 (0 to 0)       | 10.9% (-0.5% to 25.2%)    |
| 11 | Cameroon | Poisoning by other means                        | 0 (0 to 0)       | 0 (0 to 0)       | -15.1% (-22.4% to -7.1%)  |
| 12 | Cameroon | Pulmonary aspiration and foreign body in airway | 0 (0 to 0)       | 0 (0 to 0)       | 1.8% (-8.2% to 11.7%)     |
| 13 | Cameroon | Self-harm by firearm                            | 0 (0 to 0)       | 0 (0 to 0)       | 37.9% (28.6% to 49.6%)    |
| 14 | Cameroon | Self-harm by other specified means              | 0 (0 to 0)       | 0 (0 to 0)       | 25.6% (17.9% to 33.5%)    |
| 15 | Cameroon | Unintentional firearm injuries                  | 1 (0 to 2)       | 1 (0 to 2)       | -11.1% (-19.8% to -1.1%)  |
| 16 | Cameroon | Venomous animal contact                         | 0 (0 to 1)       | 0 (0 to 1)       | -0.1% (-7.7% to 7.2%)     |
| 17 | Canada   | Adverse effects of medical treatment            | 0 (0 to 0)       | 0 (0 to 0)       | 0% (0% to 0%)             |
| 18 | Canada   | Conflict and terrorism                          | 0 (0 to 0)       | 0 (0 to 0)       | NA                        |
| 19 | Canada   | Cyclist road injuries                           | 15 (10 to 21)    | 13 (9 to 17)     | -14.1% (-27.4% to 0.9%)   |
| 20 | Canada   | Drowning                                        | 0 (0 to 0)       | 0 (0 to 1)       | 38.6% (22.8% to 56.2%)    |
| 21 | Canada   | Environmental heat and cold exposure            | 4 (3 to 5)       | 3 (2 to 5)       | -8.3% (-13.9% to -3.8%)   |
| 22 | Canada   | Executions and police conflict                  | 0 (0 to 0)       | 0 (0 to 0)       | NA                        |
| 23 | Canada   | Exposure to forces of nature                    | 0 (0 to 0)       | 0 (0 to 0)       | NA                        |
| 24 | Canada   | Falls                                           | 182 (147 to 228) | 224 (181 to 279) | 23.5% (18.4% to 28.9%)    |
| 25 | Canada   | Fire, heat, and hot substances                  | 3 (2 to 5)       | 2 (1 to 4)       | -18.8% (-25.5% to -13.4%) |
| 26 | Canada   | Foreign body in eyes                            | 0 (0 to 0)       | 0 (0 to 0)       | 0.3% (0% to 0.9%)         |
| 27 | Canada   | Foreign body in other body part                 | 1 (1 to 3)       | 1 (1 to 3)       | 0.3% (-3.8% to 4.2%)      |
| 28 | Canada   | Motor vehicle road injuries                     | 75 (59 to 92)    | 44 (34 to 55)    | -40.8% (-48.4% to -31%)   |
| 29 | Canada   | Motorcyclist road injuries                      | 10 (7 to 13)     | 8 (6 to 11)      | -18.6% (-34.1% to 0.8%)   |
| 30 | Canada   | Non-venomous animal contact                     | 6 (3 to 10)      | 6 (3 to 10)      | -4.6% (-8.7% to -0.5%)    |
| 31 | Canada   | Other exposure to mechanical forces             | 51 (31 to 81)    | 44 (26 to 70)    | -14.7% (-21.7% to -8.2%)  |
| 32 | Canada   | Other road injuries                             | 1 (1 to 2)       | 1 (1 to 2)       | 21.3% (2.9% to 44.4%)     |
| 33 | Canada   | Other transport injuries                        | 19 (14 to 24)    | 18 (14 to 23)    | -1.9% (-5.1% to 1.6%)     |
| 34 | Canada   | Other unintentional injuries                    | 32 (21 to 50)    | 27 (18 to 43)    | -14.9% (-19.6% to -10.2%) |
| 35 | Canada   | Pedestrian road injuries                        | 9 (7 to 11)      | 7 (5 to 9)       | -18.7% (-29.6% to -5.6%)  |
| 36 | Canada   | Physical violence by firearm                    | 1 (1 to 1)       | 1 (1 to 2)       | 43.4% (29.8% to 56.4%)    |
| 37 | Canada   | Physical violence by other means                | 17 (12 to 25)    | 18 (13 to 26)    | 4.6% (-3.7% to 11.7%)     |
| 38 | Canada   | Physical violence by sharp object               | 3 (2 to 4)       | 3 (2 to 4)       | -0.1% (-10% to 10.4%)     |
| 39 | Canada   | Poisoning by carbon monoxide                    | 0 (0 to 0)       | 0 (0 to 0)       | 7.9% (-0.7% to 16.9%)     |
| 40 | Canada   | Poisoning by other means                        | 0 (0 to 1)       | 0 (0 to 1)       | -8.9% (-13.9% to -4.2%)   |
| 41 | Canada   | Pulmonary aspiration and foreign body in airway | 1 (1 to 1)       | 1 (0 to 1)       | -12.8% (-18.8% to -7.5%)  |
| 42 | Canada   | Self-harm by firearm                            | 0 (0 to 1)       | 0 (0 to 0)       | -47.1% (-58.4% to -34.2%) |
| 43 | Canada   | Self-harm by other specified means              | 6 (4 to 9)       | 6 (4 to 10)      | 1.4% (-5.1% to 7.9%)      |
| 44 | Canada   | Unintentional firearm injuries                  | 2 (1 to 3)       | 2 (1 to 3)       | -0.8% (-12.7% to 11.6%)   |
| 45 |          |                                                 |                  |                  |                           |
| 46 |          |                                                 |                  |                  |                           |

|    |                          |                                                 |                |               |                           |
|----|--------------------------|-------------------------------------------------|----------------|---------------|---------------------------|
| 1  |                          |                                                 |                |               |                           |
| 2  | Canada                   | Venomous animal contact                         | 3 (1 to 6)     | 3 (1 to 5)    | -4.6% (-9.6% to 0.4%)     |
| 3  | Central African Republic | Adverse effects of medical treatment            | 0 (0 to 0)     | 0 (0 to 0)    | 0% (0% to 0%)             |
| 4  | Central African Republic | Conflict and terrorism                          | 0 (0 to 0)     | 39 (16 to 89) | NA                        |
| 5  | Central African Republic | Cyclist road injuries                           | 18 (12 to 25)  | 20 (13 to 27) | 11% (3.7% to 19.2%)       |
| 6  | Central African Republic | Drowning                                        | 0 (0 to 0)     | 0 (0 to 0)    | -17.5% (-23.5% to -10.9%) |
| 7  | Central African Republic | Environmental heat and cold exposure            | 2 (2 to 3)     | 2 (1 to 3)    | -3.3% (-7.7% to 1.4%)     |
| 8  | Central African Republic | Executions and police conflict                  | 0 (0 to 0)     | 0 (0 to 1)    | NA                        |
| 9  | Central African Republic | Exposure to forces of nature                    | 0 (0 to 0)     | 0 (0 to 0)    | NA                        |
| 10 | Central African Republic | Falls                                           | 35 (28 to 44)  | 34 (27 to 44) | -2.2% (-5.7% to 1.2%)     |
| 11 | Central African Republic | Fire, heat, and hot substances                  | 1 (1 to 2)     | 1 (1 to 1)    | -8.5% (-13.1% to -3.4%)   |
| 12 | Central African Republic | Foreign body in eyes                            | 0 (0 to 0)     | 0 (0 to 0)    | -0.2% (-0.8% to 0.3%)     |
| 13 | Central African Republic | Foreign body in other body part                 | 3 (2 to 7)     | 3 (2 to 7)    | -1.9% (-6.7% to 3.3%)     |
| 14 | Central African Republic | Motor vehicle road injuries                     | 30 (22 to 39)  | 30 (22 to 40) | 2% (-5.2% to 10.1%)       |
| 15 | Central African Republic | Motorcyclist road injuries                      | 15 (11 to 19)  | 18 (14 to 23) | 21.3% (10.5% to 33.4%)    |
| 16 | Central African Republic | Non-venomous animal contact                     | 8 (5 to 14)    | 8 (5 to 14)   | 1.5% (-2.9% to 6.5%)      |
| 17 | Central African Republic | Other exposure to mechanical forces             | 14 (8 to 23)   | 13 (7 to 21)  | -9.5% (-15% to -3%)       |
| 18 | Central African Republic | Other road injuries                             | 1 (1 to 2)     | 1 (1 to 2)    | 8.4% (0.2% to 17.9%)      |
| 19 | Central African Republic | Other transport injuries                        | 6 (5 to 8)     | 6 (5 to 8)    | 1.3% (-3.2% to 6.2%)      |
| 20 | Central African Republic | Other unintentional injuries                    | 7 (5 to 12)    | 7 (4 to 10)   | -12.8% (-17.2% to -8.1%)  |
| 21 | Central African Republic | Pedestrian road injuries                        | 38 (29 to 47)  | 35 (27 to 44) | -7.1% (-12.3% to -1.2%)   |
| 22 | Central African Republic | Physical violence by firearm                    | 0 (0 to 0)     | 0 (0 to 0)    | 121.2% (94.6% to 155.1%)  |
| 23 | Central African Republic | Physical violence by other means                | 6 (4 to 8)     | 14 (10 to 19) | 142.7% (112.9% to 173.9%) |
| 24 | Central African Republic | Physical violence by sharp object               | 2 (2 to 4)     | 6 (4 to 9)    | 157.8% (124.6% to 200%)   |
| 25 | Central African Republic | Poisoning by carbon monoxide                    | 0 (0 to 0)     | 0 (0 to 0)    | -0.3% (-9.7% to 10.4%)    |
| 26 | Central African Republic | Poisoning by other means                        | 0 (0 to 0)     | 0 (0 to 0)    | -13.6% (-19.4% to -7.6%)  |
| 27 | Central African Republic | Pulmonary aspiration and foreign body in airway | 0 (0 to 1)     | 0 (0 to 1)    | -3.8% (-13.6% to 6.9%)    |
| 28 | Central African Republic | Self-harm by firearm                            | 0 (0 to 1)     | 0 (0 to 1)    | -3.6% (-13.9% to 8.8%)    |
| 29 | Central African Republic | Self-harm by other specified means              | 1 (1 to 2)     | 1 (1 to 2)    | -13.1% (-17.9% to -8.1%)  |
| 30 | Central African Republic | Unintentional firearm injuries                  | 1 (1 to 2)     | 1 (1 to 2)    | -3.6% (-10.5% to 3.9%)    |
| 31 | Chad                     | Venomous animal contact                         | 1 (0 to 4)     | 2 (1 to 4)    | 9.7% (3.3% to 18.3%)      |
| 32 | Chad                     | Adverse effects of medical treatment            | 0 (0 to 0)     | 0 (0 to 0)    | 0% (0% to 0%)             |
| 33 | Chad                     | Conflict and terrorism                          | 53 (16 to 133) | 8 (2 to 20)   | NA                        |
| 34 | Chad                     | Cyclist road injuries                           | 24 (15 to 35)  | 28 (18 to 42) | 19.6% (11.2% to 27.8%)    |
| 35 | Chad                     | Drowning                                        | 0 (0 to 0)     | 0 (0 to 0)    | -6.9% (-12.2% to -1%)     |
| 36 | Chad                     | Environmental heat and cold exposure            | 0 (0 to 1)     | 0 (0 to 1)    | 3.9% (-1.4% to 9.8%)      |
| 37 | Chad                     | Executions and police conflict                  | 0 (0 to 0)     | 0 (0 to 0)    | NA                        |
| 38 | Chad                     | Exposure to forces of nature                    | 0 (0 to 0)     | 0 (0 to 0)    | NA                        |
| 39 | Chad                     | Falls                                           | 15 (10 to 23)  | 18 (11 to 27) | 14.1% (10.3% to 17.8%)    |
| 40 | Chad                     | Fire, heat, and hot substances                  | 0 (0 to 0)     | 0 (0 to 0)    | 5.2% (-0.1% to 11.1%)     |
| 41 | Chad                     | Foreign body in eyes                            | 0 (0 to 0)     | 0 (0 to 0)    | 1.6% (0.2% to 3.5%)       |
| 42 | Chad                     | Foreign body in other body part                 | 4 (1 to 8)     | 4 (2 to 8)    | 0.4% (-4.8% to 6.3%)      |
| 43 | Chad                     | Motor vehicle road injuries                     | 42 (29 to 58)  | 54 (37 to 74) | 28.2% (19.6% to 37.5%)    |
| 44 | Chad                     | Motorcyclist road injuries                      | 15 (10 to 21)  | 22 (16 to 31) | 49.1% (37.8% to 60.8%)    |
| 45 |                          |                                                 |                |               |                           |
| 46 |                          |                                                 |                |               |                           |

|    |       |                                                 |                  |                  |                           |
|----|-------|-------------------------------------------------|------------------|------------------|---------------------------|
| 1  |       |                                                 |                  |                  |                           |
| 2  | Chad  | Non-venomous animal contact                     | 3 (1 to 6)       | 3 (2 to 6)       | 2.5% (-2% to 7.7%)        |
| 3  | Chad  | Other exposure to mechanical forces             | 26 (13 to 47)    | 25 (12 to 45)    | -4% (-9% to 1.3%)         |
| 4  | Chad  | Other road injuries                             | 2 (1 to 4)       | 2 (1 to 4)       | 12% (4% to 20.7%)         |
| 5  | Chad  | Other transport injuries                        | 3 (2 to 4)       | 3 (2 to 4)       | 1.3% (-4.1% to 7.4%)      |
| 6  | Chad  | Other unintentional injuries                    | 3 (2 to 5)       | 3 (2 to 5)       | -6.5% (-10.6% to -1.7%)   |
| 7  | Chad  | Pedestrian road injuries                        | 51 (38 to 66)    | 59 (43 to 77)    | 16.1% (9.4% to 22.6%)     |
| 8  | Chad  | Physical violence by firearm                    | 0 (0 to 0)       | 0 (0 to 0)       | 29.1% (18.5% to 40.4%)    |
| 9  | Chad  | Physical violence by other means                | 7 (5 to 10)      | 9 (6 to 13)      | 26.5% (19.8% to 34.2%)    |
| 10 | Chad  | Physical violence by sharp object               | 2 (1 to 3)       | 2 (1 to 4)       | 22.7% (13.7% to 33.4%)    |
| 11 | Chad  | Poisoning by carbon monoxide                    | 0 (0 to 0)       | 0 (0 to 0)       | 9.2% (-1% to 21.3%)       |
| 12 | Chad  | Poisoning by other means                        | 0 (0 to 0)       | 0 (0 to 0)       | -4.9% (-11.1% to 2.3%)    |
| 13 | Chad  | Pulmonary aspiration and foreign body in airway | 0 (0 to 0)       | 0 (0 to 0)       | -6.4% (-16.2% to 3.5%)    |
| 14 | Chad  | Self-harm by firearm                            | 0 (0 to 0)       | 0 (0 to 0)       | 31.3% (22.3% to 42.9%)    |
| 15 | Chad  | Self-harm by other specified means              | 0 (0 to 0)       | 0 (0 to 0)       | 20.7% (14.6% to 27%)      |
| 16 | Chad  | Unintentional firearm injuries                  | 1 (0 to 2)       | 1 (0 to 2)       | -12.3% (-18.8% to -5.5%)  |
| 17 | Chad  | Venomous animal contact                         | 0 (0 to 1)       | 1 (0 to 1)       | 3.9% (-2.9% to 11.9%)     |
| 18 | Chile | Adverse effects of medical treatment            | 0 (0 to 0)       | 0 (0 to 0)       | 0% (0% to 0%)             |
| 19 | Chile | Conflict and terrorism                          | 0 (0 to 1)       | 0 (0 to 0)       | NA                        |
| 20 | Chile | Cyclist road injuries                           | 21 (15 to 28)    | 24 (17 to 32)    | 16.2% (4.5% to 31.6%)     |
| 21 | Chile | Drowning                                        | 0 (0 to 0)       | 0 (0 to 1)       | 68.2% (46.5% to 91.7%)    |
| 22 | Chile | Environmental heat and cold exposure            | 2 (1 to 3)       | 2 (1 to 2)       | -14.8% (-21.1% to -9.7%)  |
| 23 | Chile | Executions and police conflict                  | 0 (0 to 0)       | 0 (0 to 0)       | NA                        |
| 24 | Chile | Exposure to forces of nature                    | 0 (0 to 0)       | 0 (0 to 0)       | NA                        |
| 25 | Chile | Falls                                           | 138 (107 to 178) | 177 (137 to 228) | 28.6% (23.8% to 33.4%)    |
| 26 | Chile | Fire, heat, and hot substances                  | 6 (3 to 9)       | 4 (2 to 7)       | -27% (-35% to -20.7%)     |
| 27 | Chile | Foreign body in eyes                            | 0 (0 to 0)       | 0 (0 to 0)       | 0.2% (0% to 0.6%)         |
| 28 | Chile | Foreign body in other body part                 | 2 (1 to 5)       | 2 (1 to 5)       | 3.9% (-0.9% to 9.5%)      |
| 29 | Chile | Motor vehicle road injuries                     | 32 (25 to 42)    | 33 (25 to 42)    | 1.6% (-8.6% to 13.2%)     |
| 30 | Chile | Motorcyclist road injuries                      | 4 (3 to 5)       | 6 (5 to 8)       | 68.1% (45.7% to 96%)      |
| 31 | Chile | Non-venomous animal contact                     | 5 (3 to 9)       | 4 (2 to 8)       | -18.9% (-22.7% to -14.8%) |
| 32 | Chile | Other exposure to mechanical forces             | 82 (51 to 128)   | 85 (52 to 133)   | 3.4% (-2.8% to 10.3%)     |
| 33 | Chile | Other road injuries                             | 1 (1 to 2)       | 1 (1 to 2)       | 6.9% (-4.3% to 19.7%)     |
| 34 | Chile | Other transport injuries                        | 4 (3 to 5)       | 4 (3 to 5)       | -5.8% (-12.1% to 0.1%)    |
| 35 | Chile | Other unintentional injuries                    | 31 (20 to 50)    | 28 (18 to 45)    | -10.8% (-17.9% to -4.3%)  |
| 36 | Chile | Pedestrian road injuries                        | 20 (16 to 25)    | 15 (12 to 20)    | -23.2% (-31.2% to -14.6%) |
| 37 | Chile | Physical violence by firearm                    | 0 (0 to 1)       | 1 (1 to 2)       | 260.4% (182.6% to 366.9%) |
| 38 | Chile | Physical violence by other means                | 37 (27 to 52)    | 30 (21 to 43)    | -20.1% (-31.8% to -7.3%)  |
| 39 | Chile | Physical violence by sharp object               | 4 (2 to 6)       | 7 (5 to 12)      | 94.4% (53.2% to 145.1%)   |
| 40 | Chile | Poisoning by carbon monoxide                    | 0 (0 to 0)       | 0 (0 to 0)       | 33.2% (21.1% to 45.6%)    |
| 41 | Chile | Poisoning by other means                        | 0 (0 to 1)       | 0 (0 to 1)       | 6.1% (-1.9% to 13.1%)     |
| 42 | Chile | Pulmonary aspiration and foreign body in airway | 1 (1 to 2)       | 0 (0 to 1)       | -55.8% (-63.3% to -46.6%) |
| 43 | Chile | Self-harm by firearm                            | 1 (0 to 1)       | 0 (0 to 1)       | -40.8% (-50.6% to -30.6%) |
| 44 | Chile | Self-harm by other specified means              | 3 (2 to 5)       | 3 (2 to 4)       | -14.9% (-20.3% to -9%)    |
| 45 |       |                                                 |                  |                  |                           |
| 46 |       |                                                 |                  |                  |                           |

|    |          |                                                 |                 |                |                           |
|----|----------|-------------------------------------------------|-----------------|----------------|---------------------------|
| 1  |          |                                                 |                 |                |                           |
| 2  | Chile    | Unintentional firearm injuries                  | 4 (2 to 6)      | 3 (2 to 6)     | -16.7% (-28.1% to -5.1%)  |
| 3  | Chile    | Venomous animal contact                         | 4 (1 to 7)      | 3 (1 to 6)     | -21.1% (-25.4% to -16.9%) |
| 4  | China    | Adverse effects of medical treatment            | 0 (0 to 0)      | 0 (0 to 0)     | 0% (0% to 0%)             |
| 5  | China    | Conflict and terrorism                          | 0 (0 to 0)      | 0 (0 to 0)     | NA                        |
| 6  | China    | Cyclist road injuries                           | 11 (7 to 17)    | 21 (13 to 32)  | 92.2% (82.2% to 102.4%)   |
| 7  | China    | Drowning                                        | 0 (0 to 0)      | 0 (0 to 0)     | -10.2% (-21.4% to 1.5%)   |
| 8  | China    | Environmental heat and cold exposure            | 0 (0 to 1)      | 0 (0 to 1)     | -10.7% (-16.6% to -5.4%)  |
| 9  | China    | Executions and police conflict                  | 0 (0 to 0)      | 0 (0 to 0)     | NA                        |
| 10 | China    | Exposure to forces of nature                    | 1 (0 to 1)      | 0 (0 to 0)     | NA                        |
| 11 | China    | Falls                                           | 45 (29 to 69)   | 56 (37 to 82)  | 23% (17.2% to 30.1%)      |
| 12 | China    | Fire, heat, and hot substances                  | 0 (0 to 0)      | 0 (0 to 0)     | 10.7% (4.5% to 16.2%)     |
| 13 | China    | Foreign body in eyes                            | 0 (0 to 0)      | 0 (0 to 0)     | -29.2% (-32.6% to -25.7%) |
| 14 | China    | Foreign body in other body part                 | 1 (1 to 3)      | 1 (0 to 1)     | -49.7% (-54.9% to -42.8%) |
| 15 | China    | Motor vehicle road injuries                     | 9 (5 to 13)     | 19 (12 to 29)  | 118.8% (107.1% to 131.6%) |
| 16 | China    | Motorcyclist road injuries                      | 17 (12 to 23)   | 36 (26 to 49)  | 114.5% (103.8% to 127.7%) |
| 17 | China    | Non-venomous animal contact                     | 2 (1 to 4)      | 1 (1 to 3)     | -40.2% (-43% to -37.2%)   |
| 18 | China    | Other exposure to mechanical forces             | 12 (6 to 22)    | 17 (9 to 33)   | 50.1% (38.6% to 63.5%)    |
| 19 | China    | Other road injuries                             | 2 (1 to 3)      | 3 (1 to 6)     | 91.1% (80.6% to 102.2%)   |
| 20 | China    | Other transport injuries                        | 3 (2 to 4)      | 2 (2 to 4)     | -18.1% (-25.2% to -11.4%) |
| 21 | China    | Other unintentional injuries                    | 1 (1 to 2)      | 1 (1 to 2)     | -20.9% (-25.3% to -15.2%) |
| 22 | China    | Pedestrian road injuries                        | 20 (14 to 27)   | 32 (22 to 43)  | 58.8% (51.3% to 66.3%)    |
| 23 | China    | Physical violence by firearm                    | 0 (0 to 1)      | 1 (0 to 1)     | 18.6% (-3.7% to 40.6%)    |
| 24 | China    | Physical violence by other means                | 15 (10 to 22)   | 14 (9 to 21)   | -7.4% (-12.3% to -2.7%)   |
| 25 | China    | Physical violence by sharp object               | 2 (1 to 5)      | 2 (1 to 3)     | -30.6% (-37.3% to -24.1%) |
| 26 | China    | Poisoning by carbon monoxide                    | 0 (0 to 0)      | 0 (0 to 0)     | 38.1% (30.4% to 47.3%)    |
| 27 | China    | Poisoning by other means                        | 0 (0 to 0)      | 0 (0 to 0)     | -1% (-6.5% to 4.7%)       |
| 28 | China    | Pulmonary aspiration and foreign body in airway | 0 (0 to 0)      | 0 (0 to 0)     | -30.7% (-37.4% to -22%)   |
| 29 | China    | Self-harm by firearm                            | 0 (0 to 0)      | 0 (0 to 0)     | -25.7% (-36.3% to -9.8%)  |
| 30 | China    | Self-harm by other specified means              | 0 (0 to 1)      | 0 (0 to 0)     | -64.4% (-70.5% to -57.7%) |
| 31 | China    | Unintentional firearm injuries                  | 1 (0 to 2)      | 1 (0 to 2)     | -20.3% (-28% to -10.5%)   |
| 32 | China    | Venomous animal contact                         | 0 (0 to 1)      | 0 (0 to 0)     | -49.1% (-53.7% to -42.9%) |
| 33 | Colombia | Adverse effects of medical treatment            | 0 (0 to 0)      | 0 (0 to 0)     | 0% (0% to 0%)             |
| 34 | Colombia | Conflict and terrorism                          | 25 (10 to 56)   | 0 (0 to 0)     | NA                        |
| 35 | Colombia | Cyclist road injuries                           | 33 (23 to 45)   | 28 (19 to 38)  | -14.2% (-24.5% to -2.4%)  |
| 36 | Colombia | Drowning                                        | 0 (0 to 0)      | 0 (0 to 1)     | 51.8% (33.6% to 71.2%)    |
| 37 | Colombia | Environmental heat and cold exposure            | 3 (2 to 4)      | 3 (2 to 4)     | -5.7% (-10.7% to -0.3%)   |
| 38 | Colombia | Executions and police conflict                  | 0 (0 to 0)      | 0 (0 to 0)     | NA                        |
| 39 | Colombia | Exposure to forces of nature                    | 0 (0 to 0)      | 0 (0 to 0)     | NA                        |
| 40 | Colombia | Falls                                           | 106 (82 to 137) | 89 (67 to 119) | -15.9% (-21.6% to -9.8%)  |
| 41 | Colombia | Fire, heat, and hot substances                  | 4 (3 to 7)      | 3 (2 to 5)     | -25.9% (-33.9% to -17.7%) |
| 42 | Colombia | Foreign body in eyes                            | 0 (0 to 0)      | 0 (0 to 0)     | -0.5% (-1.1% to 0%)       |
| 43 | Colombia | Foreign body in other body part                 | 1 (1 to 2)      | 1 (0 to 2)     | -3.5% (-8.6% to 2.5%)     |
| 44 | Colombia | Motor vehicle road injuries                     | 52 (39 to 66)   | 37 (27 to 47)  | -29.5% (-37% to -20.2%)   |
| 45 |          |                                                 |                 |                |                           |
| 46 |          |                                                 |                 |                |                           |

|    |          |                                                 |                |                |                           |
|----|----------|-------------------------------------------------|----------------|----------------|---------------------------|
| 1  |          |                                                 |                |                |                           |
| 2  | Colombia | Motorecyclist road injuries                     | 17 (13 to 22)  | 34 (27 to 43)  | 104% (79.2% to 133.1%)    |
| 3  | Colombia | Non-venomous animal contact                     | 6 (3 to 11)    | 5 (3 to 8)     | -23% (-28.9% to -16.4%)   |
| 4  | Colombia | Other exposure to mechanical forces             | 46 (27 to 74)  | 37 (21 to 60)  | -19.9% (-26.6% to -11.9%) |
| 5  | Colombia | Other road injuries                             | 9 (5 to 14)    | 7 (4 to 12)    | -13.7% (-24.7% to -0.8%)  |
| 6  | Colombia | Other transport injuries                        | 3 (2 to 5)     | 3 (2 to 4)     | -11.2% (-16.2% to -5.8%)  |
| 7  | Colombia | Other unintentional injuries                    | 15 (10 to 24)  | 10 (6 to 16)   | -36.6% (-43.7% to -28.9%) |
| 8  | Colombia | Pedestrian road injuries                        | 61 (49 to 75)  | 27 (21 to 34)  | -56.2% (-61.1% to -50.4%) |
| 9  | Colombia | Physical violence by firearm                    | 12 (8 to 24)   | 8 (6 to 11)    | -32.7% (-65.7% to -5.5%)  |
| 10 | Colombia | Physical violence by other means                | 49 (31 to 86)  | 26 (17 to 39)  | -47.2% (-69.3% to -30.8%) |
| 11 | Colombia | Physical violence by sharp object               | 25 (15 to 47)  | 13 (8 to 21)   | -47.6% (-70.6% to -27.9%) |
| 12 | Colombia | Poisoning by carbon monoxide                    | 0 (0 to 0)     | 0 (0 to 0)     | 29.1% (12.4% to 47.4%)    |
| 13 | Colombia | Poisoning by other means                        | 0 (0 to 0)     | 0 (0 to 0)     | -15.8% (-24.8% to -7.3%)  |
| 14 | Colombia | Pulmonary aspiration and foreign body in airway | 1 (0 to 1)     | 0 (0 to 1)     | -21.9% (-30.3% to -13.9%) |
| 15 | Colombia | Self-harm by firearm                            | 0 (0 to 0)     | 0 (0 to 0)     | 5.7% (-10.2% to 21.3%)    |
| 16 | Colombia | Self-harm by other specified means              | 0 (0 to 1)     | 1 (0 to 1)     | 59.9% (45.9% to 77.8%)    |
| 17 | Colombia | Unintentional firearm injuries                  | 4 (2 to 6)     | 2 (1 to 4)     | -32.9% (-42.2% to -23.2%) |
| 18 | Colombia | Venomous animal contact                         | 9 (4 to 16)    | 6 (3 to 11)    | -30.9% (-36.9% to -25.2%) |
| 19 | Comoros  | Adverse effects of medical treatment            | 0 (0 to 0)     | 0 (0 to 0)     | 0% (0% to 0%)             |
| 20 | Comoros  | Conflict and terrorism                          | 0 (0 to 0)     | 0 (0 to 0)     | NA                        |
| 21 | Comoros  | Cyclist road injuries                           | 39 (25 to 58)  | 45 (29 to 67)  | 17.2% (7.2% to 27.9%)     |
| 22 | Comoros  | Drowning                                        | 0 (0 to 0)     | 0 (0 to 0)     | -18.5% (-25.1% to -11.3%) |
| 23 | Comoros  | Environmental heat and cold exposure            | 0 (0 to 1)     | 0 (0 to 1)     | -9.8% (-16.5% to -3.2%)   |
| 24 | Comoros  | Executions and police conflict                  | 0 (0 to 0)     | 0 (0 to 0)     | NA                        |
| 25 | Comoros  | Exposure to forces of nature                    | 0 (0 to 0)     | 0 (0 to 0)     | NA                        |
| 26 | Comoros  | Falls                                           | 22 (14 to 34)  | 26 (16 to 41)  | 20.3% (15.3% to 25.1%)    |
| 27 | Comoros  | Fire, heat, and hot substances                  | 1 (0 to 1)     | 0 (0 to 1)     | -19.3% (-24.5% to -14.3%) |
| 28 | Comoros  | Foreign body in eyes                            | 0 (0 to 0)     | 0 (0 to 0)     | -0.1% (-0.5% to 0.5%)     |
| 29 | Comoros  | Foreign body in other body part                 | 3 (1 to 7)     | 3 (1 to 8)     | 6.5% (1% to 13.3%)        |
| 30 | Comoros  | Motor vehicle road injuries                     | 85 (59 to 117) | 86 (61 to 117) | 0.6% (-6.8% to 9.5%)      |
| 31 | Comoros  | Motorecyclist road injuries                     | 32 (22 to 45)  | 30 (21 to 42)  | -7.4% (-14.5% to 0.1%)    |
| 32 | Comoros  | Non-venomous animal contact                     | 7 (3 to 13)    | 6 (3 to 11)    | -16.1% (-21.8% to -10.2%) |
| 33 | Comoros  | Other exposure to mechanical forces             | 34 (17 to 63)  | 30 (15 to 54)  | -13.3% (-19.3% to -6.7%)  |
| 34 | Comoros  | Other road injuries                             | 2 (1 to 4)     | 2 (1 to 5)     | 23.5% (12.4% to 36.5%)    |
| 35 | Comoros  | Other transport injuries                        | 3 (2 to 4)     | 3 (2 to 4)     | -4.5% (-10.7% to 1.7%)    |
| 36 | Comoros  | Other unintentional injuries                    | 3 (2 to 5)     | 3 (2 to 5)     | -15.4% (-21.8% to -9.1%)  |
| 37 | Comoros  | Pedestrian road injuries                        | 59 (42 to 81)  | 52 (37 to 71)  | -12.7% (-19.2% to -5.1%)  |
| 38 | Comoros  | Physical violence by firearm                    | 0 (0 to 0)     | 0 (0 to 0)     | 52.8% (37.2% to 70.6%)    |
| 39 | Comoros  | Physical violence by other means                | 9 (6 to 13)    | 11 (7 to 16)   | 23.9% (15.9% to 32.1%)    |
| 40 | Comoros  | Physical violence by sharp object               | 2 (1 to 4)     | 3 (1 to 5)     | 24.1% (15.2% to 34.2%)    |
| 41 | Comoros  | Poisoning by carbon monoxide                    | 0 (0 to 0)     | 0 (0 to 0)     | 16% (3.5% to 31.4%)       |
| 42 | Comoros  | Poisoning by other means                        | 0 (0 to 0)     | 0 (0 to 0)     | -27.1% (-33.8% to -19.3%) |
| 43 | Comoros  | Pulmonary aspiration and foreign body in airway | 0 (0 to 0)     | 0 (0 to 0)     | -7.5% (-16.7% to 3.1%)    |
| 44 | Comoros  | Self-harm by firearm                            | 0 (0 to 0)     | 0 (0 to 0)     | 19.6% (11.2% to 30.4%)    |
| 45 |          |                                                 |                |                |                           |
| 46 |          |                                                 |                |                |                           |



|    |              |                                                 |               |               |                           |
|----|--------------|-------------------------------------------------|---------------|---------------|---------------------------|
| 1  |              |                                                 |               |               |                           |
| 2  | Comoros      | Self-harm by other specified means              | 0 (0 to 0)    | 0 (0 to 0)    | 5.9% (0.2% to 11.8%)      |
| 3  | Comoros      | Unintentional firearm injuries                  | 1 (0 to 2)    | 1 (0 to 2)    | -17.9% (-25.6% to -8.8%)  |
| 4  | Comoros      | Venomous animal contact                         | 1 (0 to 4)    | 1 (0 to 3)    | -31% (-40.1% to -24.2%)   |
| 5  | Congo        | Adverse effects of medical treatment            | 0 (0 to 0)    | 0 (0 to 0)    | 0% (0% to 0%)             |
| 6  | Congo        | Conflict and terrorism                          | 0 (0 to 0)    | 0 (0 to 0)    | NA                        |
| 7  | Congo        | Cyclist road injuries                           | 18 (12 to 25) | 19 (12 to 26) | 3.6% (-4% to 12.6%)       |
| 8  | Congo        | Drowning                                        | 0 (0 to 0)    | 0 (0 to 0)    | -28.4% (-35.3% to -21.2%) |
| 9  | Congo        | Environmental heat and cold exposure            | 2 (2 to 3)    | 2 (1 to 3)    | -7.3% (-12.6% to -1.5%)   |
| 10 | Congo        | Executions and police conflict                  | 0 (0 to 0)    | 0 (0 to 0)    | NA                        |
| 11 | Congo        | Exposure to forces of nature                    | 0 (0 to 0)    | 0 (0 to 0)    | NA                        |
| 12 | Congo        | Falls                                           | 39 (30 to 49) | 43 (34 to 54) | 11.9% (8.2% to 15.9%)     |
| 13 | Congo        | Fire, heat, and hot substances                  | 1 (1 to 2)    | 1 (0 to 1)    | -19.9% (-26.6% to -14.3%) |
| 14 | Congo        | Foreign body in eyes                            | 0 (0 to 0)    | 0 (0 to 0)    | 1.4% (0.6% to 2.7%)       |
| 15 | Congo        | Foreign body in other body part                 | 3 (2 to 6)    | 3 (2 to 6)    | -2.8% (-8.5% to 3.3%)     |
| 16 | Congo        | Motor vehicle road injuries                     | 44 (33 to 57) | 42 (32 to 53) | -5.7% (-12.1% to 1.7%)    |
| 17 | Congo        | Motorcyclist road injuries                      | 11 (8 to 15)  | 9 (6 to 11)   | -24.5% (-32% to -17%)     |
| 18 | Congo        | Non-venomous animal contact                     | 6 (4 to 10)   | 6 (3 to 9)    | -7.4% (-12.2% to -2.2%)   |
| 19 | Congo        | Other exposure to mechanical forces             | 16 (9 to 25)  | 14 (8 to 23)  | -12% (-18% to -6.2%)      |
| 20 | Congo        | Other road injuries                             | 1 (1 to 2)    | 1 (1 to 2)    | 6% (-3.9% to 16.8%)       |
| 21 | Congo        | Other transport injuries                        | 5 (4 to 7)    | 5 (3 to 6)    | -15.8% (-22.2% to -9.3%)  |
| 22 | Congo        | Other unintentional injuries                    | 7 (5 to 11)   | 6 (4 to 10)   | -10.1% (-17.8% to -2.8%)  |
| 23 | Congo        | Pedestrian road injuries                        | 47 (36 to 59) | 38 (29 to 47) | -19.2% (-24.4% to -13.7%) |
| 24 | Congo        | Physical violence by firearm                    | 0 (0 to 0)    | 0 (0 to 0)    | 2.9% (-7.4% to 14.7%)     |
| 25 | Congo        | Physical violence by other means                | 7 (5 to 10)   | 5 (4 to 8)    | -16.7% (-22.3% to -11.3%) |
| 26 | Congo        | Physical violence by sharp object               | 3 (2 to 4)    | 2 (1 to 3)    | -16.9% (-23.5% to -9.7%)  |
| 27 | Congo        | Poisoning by carbon monoxide                    | 0 (0 to 0)    | 0 (0 to 0)    | 10.9% (-2.1% to 23.5%)    |
| 28 | Congo        | Poisoning by other means                        | 0 (0 to 0)    | 0 (0 to 0)    | -21.2% (-28.5% to -13.5%) |
| 29 | Congo        | Pulmonary aspiration and foreign body in airway | 0 (0 to 1)    | 0 (0 to 1)    | -24% (-31.4% to -15.4%)   |
| 30 | Congo        | Self-harm by firearm                            | 0 (0 to 1)    | 0 (0 to 0)    | -11.9% (-22.3% to 0.1%)   |
| 31 | Congo        | Self-harm by other specified means              | 2 (1 to 2)    | 1 (1 to 2)    | -26.6% (-30.6% to -23%)   |
| 32 | Congo        | Unintentional firearm injuries                  | 1 (1 to 2)    | 1 (1 to 2)    | -12.4% (-20.1% to -4.4%)  |
| 33 | Congo        | Venomous animal contact                         | 1 (0 to 3)    | 1 (0 to 3)    | -3.3% (-10.4% to 4.6%)    |
| 34 | Cook Islands | Adverse effects of medical treatment            | 0 (0 to 0)    | 0 (0 to 0)    | 0% (0% to 0%)             |
| 35 | Cook Islands | Conflict and terrorism                          | 0 (0 to 0)    | 0 (0 to 0)    | NA                        |
| 36 | Cook Islands | Cyclist road injuries                           | 13 (8 to 20)  | 11 (7 to 17)  | -16.6% (-23.6% to -8%)    |
| 37 | Cook Islands | Drowning                                        | 0 (0 to 0)    | 0 (0 to 0)    | 19.2% (8% to 30.9%)       |
| 38 | Cook Islands | Environmental heat and cold exposure            | 0 (0 to 1)    | 0 (0 to 1)    | 1% (-4.7% to 6.8%)        |
| 39 | Cook Islands | Executions and police conflict                  | 0 (0 to 0)    | 0 (0 to 0)    | NA                        |
| 40 | Cook Islands | Exposure to forces of nature                    | 18 (10 to 29) | 0 (0 to 0)    | NA                        |
| 41 | Cook Islands | Falls                                           | 31 (19 to 48) | 45 (28 to 71) | 47.4% (42% to 52.6%)      |
| 42 | Cook Islands | Fire, heat, and hot substances                  | 0 (0 to 1)    | 0 (0 to 1)    | 9.8% (4.4% to 16.5%)      |
| 43 | Cook Islands | Foreign body in eyes                            | 0 (0 to 0)    | 0 (0 to 0)    | -2.6% (-4.4% to -1.1%)    |
| 44 | Cook Islands | Foreign body in other body part                 | 1 (0 to 2)    | 1 (0 to 2)    | -2.7% (-8.2% to 3.3%)     |
| 45 |              |                                                 |               |               |                           |
| 46 |              |                                                 |               |               |                           |

|    |              |                                                 |                 |                 |                           |
|----|--------------|-------------------------------------------------|-----------------|-----------------|---------------------------|
| 1  |              |                                                 |                 |                 |                           |
| 2  | Cook Islands | Motor vehicle road injuries                     | 50 (34 to 69)   | 36 (25 to 51)   | -26.8% (-32.2% to -21%)   |
| 3  | Cook Islands | Motorcyclist road injuries                      | 38 (27 to 52)   | 31 (23 to 41)   | -18.5% (-24.5% to -11.3%) |
| 4  | Cook Islands | Non-venomous animal contact                     | 2 (1 to 5)      | 2 (1 to 4)      | -16.1% (-20.2% to -11.9%) |
| 5  | Cook Islands | Other exposure to mechanical forces             | 18 (8 to 34)    | 18 (8 to 33)    | -0.9% (-5.8% to 3.4%)     |
| 6  | Cook Islands | Other road injuries                             | 3 (2 to 6)      | 3 (1 to 5)      | -21.3% (-28.8% to -12.3%) |
| 7  | Cook Islands | Other transport injuries                        | 3 (2 to 5)      | 3 (2 to 5)      | -3.3% (-8.5% to 1.9%)     |
| 8  | Cook Islands | Other unintentional injuries                    | 2 (1 to 4)      | 2 (1 to 4)      | 4.9% (-1% to 9.6%)        |
| 9  | Cook Islands | Pedestrian road injuries                        | 24 (17 to 34)   | 18 (12 to 25)   | -24.9% (-30.8% to -18.4%) |
| 10 | Cook Islands | Physical violence by firearm                    | 0 (0 to 0)      | 0 (0 to 0)      | 29.7% (14.4% to 47.3%)    |
| 11 | Cook Islands | Physical violence by other means                | 21 (14 to 32)   | 17 (11 to 26)   | -17.5% (-22.8% to -12.4%) |
| 12 | Cook Islands | Physical violence by sharp object               | 2 (1 to 4)      | 1 (1 to 3)      | -21.5% (-32.7% to -10.6%) |
| 13 | Cook Islands | Poisoning by carbon monoxide                    | 0 (0 to 0)      | 0 (0 to 0)      | 15.7% (5.9% to 27.1%)     |
| 14 | Cook Islands | Poisoning by other means                        | 0 (0 to 0)      | 0 (0 to 0)      | -8.3% (-15% to -1.2%)     |
| 15 | Cook Islands | Pulmonary aspiration and foreign body in airway | 0 (0 to 0)      | 0 (0 to 0)      | -5.8% (-16.4% to 6.9%)    |
| 16 | Cook Islands | Self-harm by firearm                            | 0 (0 to 0)      | 0 (0 to 0)      | -3.7% (-11.1% to 4.7%)    |
| 17 | Cook Islands | Self-harm by other specified means              | 0 (0 to 1)      | 0 (0 to 0)      | -23.3% (-29.6% to -16.7%) |
| 18 | Cook Islands | Unintentional firearm injuries                  | 1 (0 to 2)      | 1 (0 to 2)      | 3.5% (-6% to 13.6%)       |
| 19 | Cook Islands | Venomous animal contact                         | 1 (0 to 2)      | 1 (0 to 2)      | -11.6% (-17.5% to -6.1%)  |
| 20 | Costa Rica   | Adverse effects of medical treatment            | 0 (0 to 0)      | 0 (0 to 0)      | 0% (0% to 0%)             |
| 21 | Costa Rica   | Conflict and terrorism                          | 0 (0 to 0)      | 0 (0 to 0)      | NA                        |
| 22 | Costa Rica   | Cyclist road injuries                           | 29 (21 to 39)   | 20 (14 to 29)   | -29.1% (-39% to -20.3%)   |
| 23 | Costa Rica   | Drowning                                        | 0 (0 to 1)      | 0 (0 to 1)      | -6.5% (-15.5% to 3.2%)    |
| 24 | Costa Rica   | Environmental heat and cold exposure            | 3 (2 to 4)      | 3 (2 to 4)      | 4.1% (-1% to 9%)          |
| 25 | Costa Rica   | Executions and police conflict                  | 0 (0 to 0)      | 0 (0 to 0)      | NA                        |
| 26 | Costa Rica   | Exposure to forces of nature                    | 0 (0 to 0)      | 0 (0 to 0)      | NA                        |
| 27 | Costa Rica   | Falls                                           | 126 (99 to 162) | 125 (97 to 161) | -1.5% (-5.6% to 2.3%)     |
| 28 | Costa Rica   | Fire, heat, and hot substances                  | 4 (2 to 6)      | 3 (2 to 6)      | -5.9% (-13.2% to 0.5%)    |
| 29 | Costa Rica   | Foreign body in eyes                            | 0 (0 to 0)      | 0 (0 to 0)      | -1% (-1.7% to -0.4%)      |
| 30 | Costa Rica   | Foreign body in other body part                 | 1 (1 to 3)      | 1 (1 to 2)      | -6% (-11.9% to -0.4%)     |
| 31 | Costa Rica   | Motor vehicle road injuries                     | 42 (32 to 53)   | 41 (31 to 52)   | -1.6% (-11.3% to 8.6%)    |
| 32 | Costa Rica   | Motorcyclist road injuries                      | 14 (11 to 18)   | 19 (15 to 25)   | 38.5% (20.8% to 57.8%)    |
| 33 | Costa Rica   | Non-venomous animal contact                     | 6 (4 to 11)     | 5 (3 to 9)      | -18.9% (-23.2% to -14.1%) |
| 34 | Costa Rica   | Other exposure to mechanical forces             | 37 (22 to 61)   | 38 (22 to 63)   | 3.3% (-2.9% to 8.9%)      |
| 35 | Costa Rica   | Other road injuries                             | 6 (3 to 9)      | 6 (3 to 9)      | 1.2% (-11.1% to 15%)      |
| 36 | Costa Rica   | Other transport injuries                        | 4 (3 to 6)      | 5 (4 to 6)      | 18.3% (9.5% to 28.1%)     |
| 37 | Costa Rica   | Other unintentional injuries                    | 12 (7 to 20)    | 11 (7 to 19)    | -6.3% (-11.6% to -0.9%)   |
| 38 | Costa Rica   | Pedestrian road injuries                        | 34 (27 to 42)   | 29 (23 to 36)   | -14.2% (-23.4% to -4.8%)  |
| 39 | Costa Rica   | Physical violence by firearm                    | 1 (1 to 1)      | 4 (3 to 6)      | 297.7% (230% to 384.1%)   |
| 40 | Costa Rica   | Physical violence by other means                | 14 (10 to 21)   | 22 (15 to 31)   | 51.3% (33.2% to 68.7%)    |
| 41 | Costa Rica   | Physical violence by sharp object               | 5 (3 to 8)      | 8 (5 to 12)     | 50.2% (28.2% to 74.5%)    |
| 42 | Costa Rica   | Poisoning by carbon monoxide                    | 0 (0 to 0)      | 0 (0 to 0)      | 13.1% (3.2% to 24.7%)     |
| 43 | Costa Rica   | Poisoning by other means                        | 0 (0 to 0)      | 0 (0 to 0)      | -4.1% (-10.6% to 2.3%)    |
| 44 | Costa Rica   | Pulmonary aspiration and foreign body in airway | 1 (0 to 1)      | 0 (0 to 1)      | -21.8% (-29.2% to -13.3%) |
| 45 |              |                                                 |                 |                 |                           |
| 46 |              |                                                 |                 |                 |                           |

|    |            |                                                 |                  |                  |                           |
|----|------------|-------------------------------------------------|------------------|------------------|---------------------------|
| 1  |            |                                                 |                  |                  |                           |
| 2  | Costa Rica | Self-harm by firearm                            | 0 (0 to 0)       | 0 (0 to 0)       | 4.2% (-8.8% to 16.7%)     |
| 3  | Costa Rica | Self-harm by other specified means              | 1 (0 to 1)       | 1 (0 to 1)       | 24.9% (15.8% to 35.8%)    |
| 4  | Costa Rica | Unintentional firearm injuries                  | 2 (1 to 4)       | 3 (2 to 4)       | 13.2% (3.6% to 23%)       |
| 5  | Costa Rica | Venomous animal contact                         | 7 (4 to 14)      | 6 (3 to 12)      | -15.8% (-20% to -11.4%)   |
| 6  | Croatia    | Adverse effects of medical treatment            | 0 (0 to 0)       | 0 (0 to 0)       | 0% (0% to 0%)             |
| 7  | Croatia    | Conflict and terrorism                          | 0 (0 to 0)       | 0 (0 to 0)       | NA                        |
| 8  | Croatia    | Cyclist road injuries                           | 71 (50 to 97)    | 67 (49 to 89)    | -5.6% (-16.3% to 8.2%)    |
| 9  | Croatia    | Drowning                                        | 0 (0 to 0)       | 1 (0 to 1)       | 91.8% (69.6% to 117%)     |
| 10 | Croatia    | Environmental heat and cold exposure            | 2 (2 to 3)       | 2 (1 to 2)       | -20.2% (-26.3% to -14.9%) |
| 11 | Croatia    | Executions and police conflict                  | 0 (0 to 0)       | 0 (0 to 0)       | NA                        |
| 12 | Croatia    | Exposure to forces of nature                    | 0 (0 to 0)       | 0 (0 to 0)       | NA                        |
| 13 | Croatia    | Falls                                           | 296 (236 to 375) | 400 (318 to 501) | 35.1% (28.7% to 42.2%)    |
| 14 | Croatia    | Fire, heat, and hot substances                  | 3 (2 to 5)       | 3 (2 to 5)       | -8.2% (-14.4% to -0.3%)   |
| 15 | Croatia    | Foreign body in eyes                            | 0 (0 to 0)       | 0 (0 to 0)       | -0.3% (-5% to 4.5%)       |
| 16 | Croatia    | Foreign body in other body part                 | 2 (1 to 4)       | 2 (1 to 4)       | -10.7% (-18.4% to -3.5%)  |
| 17 | Croatia    | Motor vehicle road injuries                     | 169 (132 to 212) | 119 (93 to 151)  | -29.9% (-37% to -21.6%)   |
| 18 | Croatia    | Motorcyclist road injuries                      | 19 (14 to 25)    | 26 (20 to 34)    | 37.5% (16.2% to 63.1%)    |
| 19 | Croatia    | Non-venomous animal contact                     | 4 (2 to 8)       | 4 (2 to 6)       | -20.2% (-28.3% to -11.6%) |
| 20 | Croatia    | Other exposure to mechanical forces             | 149 (93 to 231)  | 105 (67 to 163)  | -29.3% (-35.7% to -22.9%) |
| 21 | Croatia    | Other road injuries                             | 2 (1 to 3)       | 2 (1 to 3)       | 4.6% (-7.1% to 18.2%)     |
| 22 | Croatia    | Other transport injuries                        | 6 (5 to 8)       | 6 (4 to 7)       | -11.9% (-17.2% to -6.4%)  |
| 23 | Croatia    | Other unintentional injuries                    | 62 (41 to 97)    | 24 (14 to 39)    | -61.8% (-68.5% to -54.8%) |
| 24 | Croatia    | Pedestrian road injuries                        | 81 (63 to 102)   | 48 (36 to 62)    | -40.8% (-48.4% to -32.2%) |
| 25 | Croatia    | Physical violence by firearm                    | 1 (1 to 1)       | 1 (0 to 1)       | -38.1% (-53.6% to -21.9%) |
| 26 | Croatia    | Physical violence by other means                | 34 (24 to 48)    | 21 (14 to 29)    | -39.9% (-47.9% to -30.9%) |
| 27 | Croatia    | Physical violence by sharp object               | 3 (2 to 5)       | 2 (1 to 3)       | -42.2% (-52.1% to -32.3%) |
| 28 | Croatia    | Poisoning by carbon monoxide                    | 0 (0 to 0)       | 0 (0 to 0)       | 15% (1.9% to 29.8%)       |
| 29 | Croatia    | Poisoning by other means                        | 0 (0 to 1)       | 0 (0 to 1)       | -3.4% (-11.6% to 5.3%)    |
| 30 | Croatia    | Pulmonary aspiration and foreign body in airway | 1 (1 to 2)       | 1 (1 to 2)       | 4.6% (-3.3% to 13.2%)     |
| 31 | Croatia    | Self-harm by firearm                            | 2 (1 to 3)       | 1 (1 to 2)       | -36.8% (-44.1% to -28.7%) |
| 32 | Croatia    | Self-harm by other specified means              | 4 (2 to 6)       | 2 (2 to 4)       | -33.1% (-37.8% to -28.2%) |
| 33 | Croatia    | Unintentional firearm injuries                  | 3 (1 to 4)       | 1 (1 to 2)       | -56.1% (-64.3% to -47.6%) |
| 34 | Croatia    | Venomous animal contact                         | 4 (2 to 8)       | 3 (1 to 6)       | -24.2% (-32.6% to -15.9%) |
| 35 | Cuba       | Adverse effects of medical treatment            | 0 (0 to 0)       | 0 (0 to 0)       | 0% (0% to 0%)             |
| 36 | Cuba       | Conflict and terrorism                          | 1 (1 to 3)       | 0 (0 to 0)       | NA                        |
| 37 | Cuba       | Cyclist road injuries                           | 67 (52 to 86)    | 33 (25 to 43)    | -50.4% (-57.8% to -41.8%) |
| 38 | Cuba       | Drowning                                        | 0 (0 to 1)       | 0 (0 to 1)       | 44.7% (2.5% to 65.5%)     |
| 39 | Cuba       | Environmental heat and cold exposure            | 10 (7 to 14)     | 11 (8 to 16)     | 7.2% (1.2% to 12.7%)      |
| 40 | Cuba       | Executions and police conflict                  | 0 (0 to 0)       | 0 (0 to 0)       | NA                        |
| 41 | Cuba       | Exposure to forces of nature                    | 0 (0 to 0)       | 0 (0 to 0)       | NA                        |
| 42 | Cuba       | Falls                                           | 123 (100 to 154) | 187 (152 to 233) | 51.5% (44.6% to 58.8%)    |
| 43 | Cuba       | Fire, heat, and hot substances                  | 4 (2 to 7)       | 5 (3 to 9)       | 32% (20.5% to 44.2%)      |
| 44 | Cuba       | Foreign body in eyes                            | 0 (0 to 0)       | 0 (0 to 0)       | -0.1% (-0.5% to 0.1%)     |
| 45 |            |                                                 |                  |                  |                           |
| 46 |            |                                                 |                  |                  |                           |

|    |        |                                                 |                  |                  |                           |
|----|--------|-------------------------------------------------|------------------|------------------|---------------------------|
| 1  |        |                                                 |                  |                  |                           |
| 2  | Cuba   | Foreign body in other body part                 | 1 (1 to 3)       | 2 (1 to 3)       | 32.8% (25.4% to 40.8%)    |
| 3  | Cuba   | Motor vehicle road injuries                     | 27 (20 to 34)    | 18 (13 to 24)    | -31.5% (-41.2% to -20.6%) |
| 4  | Cuba   | Motorcyclist road injuries                      | 19 (15 to 24)    | 19 (14 to 24)    | -2.1% (-17% to 14.7%)     |
| 5  | Cuba   | Non-venomous animal contact                     | 4 (2 to 6)       | 5 (3 to 8)       | 35.3% (27.6% to 43.4%)    |
| 6  | Cuba   | Other exposure to mechanical forces             | 33 (19 to 55)    | 47 (26 to 79)    | 41.5% (30.1% to 52.1%)    |
| 7  | Cuba   | Other road injuries                             | 4 (2 to 7)       | 5 (3 to 8)       | 28.6% (10.1% to 51.2%)    |
| 8  | Cuba   | Other transport injuries                        | 5 (4 to 7)       | 8 (6 to 11)      | 58.3% (45.4% to 71.8%)    |
| 9  | Cuba   | Other unintentional injuries                    | 18 (12 to 29)    | 21 (13 to 34)    | 13.9% (4.7% to 21.5%)     |
| 10 | Cuba   | Pedestrian road injuries                        | 23 (18 to 29)    | 13 (10 to 17)    | -43.2% (-50.9% to -34.5%) |
| 11 | Cuba   | Physical violence by firearm                    | 1 (0 to 1)       | 1 (1 to 2)       | 65.5% (43.1% to 93.3%)    |
| 12 | Cuba   | Physical violence by other means                | 11 (8 to 17)     | 10 (7 to 15)     | -11.1% (-19.9% to -0.7%)  |
| 13 | Cuba   | Physical violence by sharp object               | 6 (4 to 9)       | 5 (3 to 8)       | -13.3% (-24.9% to 0.2%)   |
| 14 | Cuba   | Poisoning by carbon monoxide                    | 0 (0 to 0)       | 0 (0 to 0)       | 75.2% (59.6% to 95.5%)    |
| 15 | Cuba   | Poisoning by other means                        | 0 (0 to 0)       | 0 (0 to 0)       | 64.9% (54.4% to 76%)      |
| 16 | Cuba   | Pulmonary aspiration and foreign body in airway | 1 (0 to 1)       | 0 (0 to 1)       | -22.5% (-31% to -13.4%)   |
| 17 | Cuba   | Self-harm by firearm                            | 1 (0 to 1)       | 0 (0 to 1)       | -24.7% (-36.1% to -13.7%) |
| 18 | Cuba   | Self-harm by other specified means              | 2 (1 to 3)       | 1 (1 to 2)       | -49.8% (-54.5% to -45%)   |
| 19 | Cuba   | Unintentional firearm injuries                  | 4 (2 to 6)       | 6 (4 to 10)      | 75.8% (60.4% to 92%)      |
| 20 | Cyprus | Venomous animal contact                         | 5 (3 to 10)      | 7 (3 to 13)      | 28.3% (21.2% to 34.9%)    |
| 21 | Cyprus | Adverse effects of medical treatment            | 0 (0 to 0)       | 0 (0 to 0)       | 0% (0% to 0%)             |
| 22 | Cyprus | Conflict and terrorism                          | 0 (0 to 0)       | 0 (0 to 0)       | NA                        |
| 23 | Cyprus | Cyclist road injuries                           | 20 (14 to 27)    | 15 (11 to 20)    | -24.5% (-32.3% to -16.2%) |
| 24 | Cyprus | Drowning                                        | 0 (0 to 0)       | 0 (0 to 0)       | 80.6% (65.4% to 95.9%)    |
| 25 | Cyprus | Environmental heat and cold exposure            | 2 (2 to 3)       | 2 (2 to 3)       | -7.5% (-12.4% to -2.4%)   |
| 26 | Cyprus | Executions and police conflict                  | 0 (0 to 0)       | 0 (0 to 0)       | NA                        |
| 27 | Cyprus | Exposure to forces of nature                    | 0 (0 to 0)       | 0 (0 to 0)       | NA                        |
| 28 | Cyprus | Falls                                           | 226 (178 to 286) | 281 (220 to 362) | 24.3% (19.5% to 29%)      |
| 29 | Cyprus | Fire, heat, and hot substances                  | 2 (1 to 4)       | 2 (1 to 4)       | -9.2% (-15.7% to -3.4%)   |
| 30 | Cyprus | Foreign body in eyes                            | 0 (0 to 0)       | 0 (0 to 0)       | -0.5% (-1.2% to -0.2%)    |
| 31 | Cyprus | Foreign body in other body part                 | 2 (1 to 3)       | 2 (1 to 3)       | -0.4% (-4.8% to 4.1%)     |
| 32 | Cyprus | Motor vehicle road injuries                     | 36 (28 to 46)    | 21 (16 to 27)    | -41.2% (-46.7% to -35.3%) |
| 33 | Cyprus | Motorcyclist road injuries                      | 17 (13 to 22)    | 11 (8 to 14)     | -35.2% (-43.7% to -24.9%) |
| 34 | Cyprus | Non-venomous animal contact                     | 3 (1 to 4)       | 2 (1 to 4)       | -10.7% (-14.9% to -6.3%)  |
| 35 | Cyprus | Other exposure to mechanical forces             | 58 (36 to 91)    | 47 (28 to 74)    | -19.1% (-26.6% to -12.7%) |
| 36 | Cyprus | Other road injuries                             | 1 (1 to 2)       | 1 (0 to 1)       | -14.8% (-23.4% to -4.1%)  |
| 37 | Cyprus | Other transport injuries                        | 8 (6 to 10)      | 5 (3 to 6)       | -37.6% (-44.7% to -29.8%) |
| 38 | Cyprus | Other unintentional injuries                    | 24 (16 to 38)    | 21 (14 to 35)    | -10.8% (-15.9% to -6.1%)  |
| 39 | Cyprus | Pedestrian road injuries                        | 10 (7 to 13)     | 5 (4 to 7)       | -44.7% (-51% to -38.1%)   |
| 40 | Cyprus | Physical violence by firearm                    | 0 (0 to 1)       | 1 (0 to 1)       | 62.4% (47.2% to 80.1%)    |
| 41 | Cyprus | Physical violence by other means                | 21 (15 to 30)    | 17 (12 to 24)    | -18.8% (-24.5% to -12.5%) |
| 42 | Cyprus | Physical violence by sharp object               | 2 (1 to 3)       | 1 (1 to 2)       | -12.9% (-22.2% to -3.4%)  |
| 43 | Cyprus | Poisoning by carbon monoxide                    | 0 (0 to 0)       | 0 (0 to 0)       | 17.8% (8.3% to 27.3%)     |
| 44 | Cyprus | Poisoning by other means                        | 0 (0 to 0)       | 0 (0 to 0)       | -9.5% (-18.1% to -3.5%)   |
| 45 |        |                                                 |                  |                  |                           |
| 46 |        |                                                 |                  |                  |                           |

|    |               |                                                 |                  |                  |                           |
|----|---------------|-------------------------------------------------|------------------|------------------|---------------------------|
| 1  |               |                                                 |                  |                  |                           |
| 2  | Cyprus        | Pulmonary aspiration and foreign body in airway | 1 (1 to 2)       | 1 (0 to 1)       | -26.7% (-33.6% to -19.2%) |
| 3  | Cyprus        | Self-harm by firearm                            | 0 (0 to 0)       | 0 (0 to 0)       | 8.3% (-4.1% to 21.9%)     |
| 4  | Cyprus        | Self-harm by other specified means              | 1 (1 to 2)       | 1 (1 to 2)       | 4% (-2.1% to 10.7%)       |
| 5  | Cyprus        | Unintentional firearm injuries                  | 1 (1 to 2)       | 1 (1 to 2)       | -22.4% (-32.3% to -12.8%) |
| 6  | Cyprus        | Venomous animal contact                         | 1 (0 to 2)       | 1 (0 to 2)       | -11.5% (-17.1% to -5.8%)  |
| 7  | Czechia       | Adverse effects of medical treatment            | 0 (0 to 0)       | 0 (0 to 0)       | 0% (0% to 0%)             |
| 8  | Czechia       | Conflict and terrorism                          | 0 (0 to 0)       | 0 (0 to 0)       | NA                        |
| 9  | Czechia       | Cyclist road injuries                           | 83 (61 to 110)   | 72 (52 to 98)    | -12.9% (-23% to -0.6%)    |
| 10 | Czechia       | Drowning                                        | 0 (0 to 0)       | 1 (0 to 1)       | 79% (55.6% to 99.5%)      |
| 11 | Czechia       | Environmental heat and cold exposure            | 2 (2 to 3)       | 2 (2 to 3)       | 0.2% (-5.2% to 5.4%)      |
| 12 | Czechia       | Executions and police conflict                  | 0 (0 to 0)       | 0 (0 to 0)       | NA                        |
| 13 | Czechia       | Exposure to forces of nature                    | 0 (0 to 0)       | 0 (0 to 0)       | NA                        |
| 14 | Czechia       | Falls                                           | 403 (327 to 501) | 324 (253 to 416) | -19.6% (-25.9% to -13.2%) |
| 15 | Czechia       | Fire, heat, and hot substances                  | 4 (2 to 7)       | 4 (2 to 7)       | -2.3% (-8.8% to 3.2%)     |
| 16 | Czechia       | Foreign body in eyes                            | 0 (0 to 0)       | 0 (0 to 0)       | 0.9% (0.4% to 1.8%)       |
| 17 | Czechia       | Foreign body in other body part                 | 3 (1 to 5)       | 3 (1 to 5)       | 0.1% (-5.4% to 5.8%)      |
| 18 | Czechia       | Motor vehicle road injuries                     | 178 (141 to 220) | 106 (82 to 134)  | -40.8% (-47.8% to -33.1%) |
| 19 | Czechia       | Motorcyclist road injuries                      | 27 (20 to 34)    | 25 (18 to 32)    | -7.2% (-20.8% to 7.8%)    |
| 20 | Czechia       | Non-venomous animal contact                     | 7 (4 to 12)      | 6 (3 to 10)      | -14% (-18.5% to -9.3%)    |
| 21 | Czechia       | Other exposure to mechanical forces             | 158 (99 to 245)  | 143 (88 to 224)  | -9.3% (-14.6% to -3.5%)   |
| 22 | Czechia       | Other road injuries                             | 2 (1 to 3)       | 2 (1 to 3)       | -4.6% (-15.8% to 8%)      |
| 23 | Czechia       | Other transport injuries                        | 8 (6 to 11)      | 7 (5 to 9)       | -16.1% (-22.2% to -9.3%)  |
| 24 | Czechia       | Other unintentional injuries                    | 40 (25 to 62)    | 32 (20 to 53)    | -18.6% (-26.7% to -10.7%) |
| 25 | Czechia       | Pedestrian road injuries                        | 35 (26 to 45)    | 30 (22 to 40)    | -14.1% (-24.1% to -3.5%)  |
| 26 | Czechia       | Physical violence by firearm                    | 0 (0 to 1)       | 1 (0 to 1)       | 61.2% (42.2% to 83%)      |
| 27 | Czechia       | Physical violence by other means                | 33 (23 to 46)    | 31 (21 to 43)    | -7.4% (-16.1% to 1%)      |
| 28 | Czechia       | Physical violence by sharp object               | 3 (2 to 5)       | 2 (1 to 4)       | -16.5% (-28.4% to -5.2%)  |
| 29 | Czechia       | Poisoning by carbon monoxide                    | 0 (0 to 0)       | 0 (0 to 0)       | 0.1% (-12.8% to 11.8%)    |
| 30 | Czechia       | Poisoning by other means                        | 1 (0 to 1)       | 1 (0 to 1)       | -5.1% (-14.5% to 3.5%)    |
| 31 | Czechia       | Pulmonary aspiration and foreign body in airway | 1 (1 to 2)       | 1 (1 to 2)       | -27.3% (-35.3% to -19.4%) |
| 32 | Czechia       | Self-harm by firearm                            | 1 (0 to 1)       | 1 (0 to 1)       | -4.5% (-16.1% to 10.3%)   |
| 33 | Czechia       | Self-harm by other specified means              | 4 (3 to 6)       | 3 (2 to 5)       | -19.8% (-24% to -15%)     |
| 34 | Czechia       | Unintentional firearm injuries                  | 1 (1 to 2)       | 1 (1 to 2)       | -2.8% (-11.3% to 6.3%)    |
| 35 | Czechia       | Venomous animal contact                         | 5 (2 to 9)       | 4 (2 to 8)       | -16.5% (-21.4% to -11.5%) |
| 36 | Côte d'Ivoire | Adverse effects of medical treatment            | 0 (0 to 0)       | 0 (0 to 0)       | 0% (0% to 0%)             |
| 37 | Côte d'Ivoire | Conflict and terrorism                          | 0 (0 to 1)       | 0 (0 to 0)       | NA                        |
| 38 | Côte d'Ivoire | Cyclist road injuries                           | 28 (18 to 41)    | 31 (19 to 45)    | 9.2% (1.7% to 17.8%)      |
| 39 | Côte d'Ivoire | Drowning                                        | 0 (0 to 0)       | 0 (0 to 0)       | -12.2% (-18.9% to -4.2%)  |
| 40 | Côte d'Ivoire | Environmental heat and cold exposure            | 0 (0 to 1)       | 0 (0 to 1)       | 1.6% (-3% to 8%)          |
| 41 | Côte d'Ivoire | Executions and police conflict                  | 0 (0 to 0)       | 0 (0 to 1)       | NA                        |
| 42 | Côte d'Ivoire | Exposure to forces of nature                    | 0 (0 to 0)       | 0 (0 to 0)       | NA                        |
| 43 | Côte d'Ivoire | Falls                                           | 20 (13 to 29)    | 21 (14 to 32)    | 7.7% (4.4% to 11.3%)      |
| 44 | Côte d'Ivoire | Fire, heat, and hot substances                  | 0 (0 to 0)       | 0 (0 to 0)       | -10.5% (-16% to -4.9%)    |
| 45 |               |                                                 |                  |                  |                           |
| 46 |               |                                                 |                  |                  |                           |

|    |                                       |                                                 |               |               |                           |
|----|---------------------------------------|-------------------------------------------------|---------------|---------------|---------------------------|
| 1  |                                       |                                                 |               |               |                           |
| 2  | Côte d'Ivoire                         | Foreign body in eyes                            | 0 (0 to 0)    | 0 (0 to 0)    | -0.2% (-0.6% to 0.1%)     |
| 3  | Côte d'Ivoire                         | Foreign body in other body part                 | 3 (1 to 7)    | 3 (1 to 8)    | 1.1% (-3.6% to 5.5%)      |
| 4  | Côte d'Ivoire                         | Motor vehicle road injuries                     | 54 (38 to 76) | 55 (38 to 76) | 1.7% (-5.6% to 9.5%)      |
| 5  | Côte d'Ivoire                         | Motorcyclist road injuries                      | 27 (19 to 36) | 27 (19 to 37) | 0.2% (-7.4% to 8.4%)      |
| 6  | Côte d'Ivoire                         | Non-venomous animal contact                     | 3 (1 to 6)    | 3 (1 to 5)    | -8.2% (-13.1% to -3.2%)   |
| 7  | Côte d'Ivoire                         | Other exposure to mechanical forces             | 26 (13 to 47) | 24 (12 to 43) | -9.3% (-14.2% to -4.5%)   |
| 8  | Côte d'Ivoire                         | Other road injuries                             | 2 (1 to 4)    | 2 (1 to 4)    | 6.1% (-2.5% to 15%)       |
| 9  | Côte d'Ivoire                         | Other transport injuries                        | 3 (2 to 4)    | 3 (2 to 4)    | -3.2% (-9.2% to 2.3%)     |
| 10 | Côte d'Ivoire                         | Other unintentional injuries                    | 3 (2 to 5)    | 2 (1 to 4)    | -10% (-15.2% to -5.2%)    |
| 11 | Côte d'Ivoire                         | Pedestrian road injuries                        | 61 (45 to 80) | 59 (43 to 77) | -3.8% (-10% to 3%)        |
| 12 | Côte d'Ivoire                         | Physical violence by firearm                    | 0 (0 to 0)    | 0 (0 to 0)    | 5.7% (-5.8% to 19%)       |
| 13 | Côte d'Ivoire                         | Physical violence by other means                | 10 (7 to 15)  | 10 (7 to 15)  | -3.3% (-8.2% to 1.5%)     |
| 14 | Côte d'Ivoire                         | Physical violence by sharp object               | 3 (1 to 5)    | 2 (1 to 4)    | -6% (-13% to 0.8%)        |
| 15 | Côte d'Ivoire                         | Poisoning by carbon monoxide                    | 0 (0 to 0)    | 0 (0 to 0)    | 6.7% (-2.2% to 16.9%)     |
| 16 | Côte d'Ivoire                         | Poisoning by other means                        | 0 (0 to 0)    | 0 (0 to 0)    | -14.5% (-20.9% to -7.3%)  |
| 17 | Côte d'Ivoire                         | Pulmonary aspiration and foreign body in airway | 0 (0 to 0)    | 0 (0 to 0)    | -8.9% (-18.3% to 0.4%)    |
| 18 | Côte d'Ivoire                         | Self-harm by firearm                            | 0 (0 to 0)    | 0 (0 to 0)    | -0.5% (-7.5% to 6.8%)     |
| 19 | Côte d'Ivoire                         | Self-harm by other specified means              | 0 (0 to 0)    | 0 (0 to 0)    | -0.2% (-6.1% to 5.8%)     |
| 20 | Côte d'Ivoire                         | Unintentional firearm injuries                  | 1 (0 to 2)    | 1 (0 to 2)    | -10.1% (-17.2% to -2.5%)  |
| 21 | Côte d'Ivoire                         | Venomous animal contact                         | 0 (0 to 1)    | 0 (0 to 1)    | -7.9% (-15.1% to -0.9%)   |
| 22 | Democratic People's Republic of Korea | Adverse effects of medical treatment            | 0 (0 to 0)    | 0 (0 to 0)    | 0% (0% to 0%)             |
| 23 | Democratic People's Republic of Korea | Conflict and terrorism                          | 0 (0 to 0)    | 0 (0 to 0)    | NA                        |
| 24 | Democratic People's Republic of Korea | Cyclist road injuries                           | 15 (11 to 21) | 21 (15 to 29) | 39.2% (27.9% to 52%)      |
| 25 | Democratic People's Republic of Korea | Drowning                                        | 1 (0 to 1)    | 0 (0 to 1)    | -29.4% (-38.1% to -19.2%) |
| 26 | Democratic People's Republic of Korea | Environmental heat and cold exposure            | 2 (1 to 3)    | 2 (1 to 3)    | 4.1% (-1.3% to 9.5%)      |
| 27 | Democratic People's Republic of Korea | Executions and police conflict                  | 0 (0 to 0)    | 0 (0 to 0)    | NA                        |
| 28 | Democratic People's Republic of Korea | Exposure to forces of nature                    | 0 (0 to 0)    | 0 (0 to 0)    | NA                        |
| 29 | Democratic People's Republic of Korea | Falls                                           | 58 (46 to 75) | 36 (28 to 47) | -38.1% (-40.2% to -35.8%) |
| 30 | Democratic People's Republic of Korea | Fire, heat, and hot substances                  | 1 (0 to 1)    | 1 (0 to 1)    | -13.8% (-19.6% to -8.5%)  |
| 31 | Democratic People's Republic of Korea | Foreign body in eyes                            | 0 (0 to 0)    | 0 (0 to 0)    | 3.9% (2.6% to 5.7%)       |
| 32 | Democratic People's Republic of Korea | Foreign body in other body part                 | 0 (0 to 1)    | 0 (0 to 1)    | -3.2% (-9.4% to 3.5%)     |
| 33 | Democratic People's Republic of Korea | Motor vehicle road injuries                     | 13 (10 to 18) | 15 (11 to 20) | 16.5% (6.4% to 27.1%)     |
| 34 | Democratic People's Republic of Korea | Motorcyclist road injuries                      | 20 (16 to 26) | 29 (23 to 37) | 44.5% (32.3% to 57%)      |
| 35 | Democratic People's Republic of Korea | Non-venomous animal contact                     | 2 (1 to 4)    | 2 (1 to 3)    | -14.8% (-19.1% to -9.8%)  |
| 36 | Democratic People's Republic of Korea | Other exposure to mechanical forces             | 5 (3 to 9)    | 7 (4 to 12)   | 41.4% (31.8% to 54%)      |
| 37 | Democratic People's Republic of Korea | Other road injuries                             | 1 (0 to 2)    | 1 (1 to 2)    | 12.1% (1.5% to 23.9%)     |
| 38 | Democratic People's Republic of Korea | Other transport injuries                        | 6 (4 to 8)    | 5 (4 to 7)    | -8.5% (-12.8% to -3.7%)   |
| 39 | Democratic People's Republic of Korea | Other unintentional injuries                    | 4 (3 to 6)    | 4 (3 to 7)    | 3.6% (-1.7% to 10.5%)     |
| 40 | Democratic People's Republic of Korea | Pedestrian road injuries                        | 14 (10 to 17) | 16 (12 to 20) | 18.4% (9.5% to 28.5%)     |
| 41 | Democratic People's Republic of Korea | Physical violence by firearm                    | 0 (0 to 0)    | 0 (0 to 0)    | -1% (-13.3% to 11.9%)     |
| 42 | Democratic People's Republic of Korea | Physical violence by other means                | 15 (11 to 22) | 18 (13 to 25) | 16.7% (9.2% to 25.4%)     |
| 43 | Democratic People's Republic of Korea | Physical violence by sharp object               | 3 (2 to 5)    | 3 (2 to 5)    | -0.4% (-10.2% to 9.8%)    |
| 44 | Democratic People's Republic of Korea | Poisoning by carbon monoxide                    | 0 (0 to 0)    | 0 (0 to 0)    | 15.6% (5.6% to 28.1%)     |
| 45 |                                       |                                                 |               |               |                           |
| 46 |                                       |                                                 |               |               |                           |

|    |                                       |                                                 |                  |                  |                           |
|----|---------------------------------------|-------------------------------------------------|------------------|------------------|---------------------------|
| 1  |                                       |                                                 |                  |                  |                           |
| 2  | Democratic People's Republic of Korea | Poisoning by other means                        | 0 (0 to 0)       | 0 (0 to 0)       | -10.1% (-17.1% to -1.3%)  |
| 3  | Democratic People's Republic of Korea | Pulmonary aspiration and foreign body in airway | 0 (0 to 0)       | 0 (0 to 0)       | 17.2% (1% to 36.1%)       |
| 4  | Democratic People's Republic of Korea | Self-harm by firearm                            | 1 (0 to 1)       | 0 (0 to 1)       | -23.8% (-32% to -13.8%)   |
| 5  | Democratic People's Republic of Korea | Self-harm by other specified means              | 2 (1 to 4)       | 1 (1 to 2)       | -40.1% (-44% to -36.2%)   |
| 6  | Democratic People's Republic of Korea | Unintentional firearm injuries                  | 1 (1 to 2)       | 1 (1 to 2)       | -6% (-15% to 2.6%)        |
| 7  | Democratic People's Republic of Korea | Venomous animal contact                         | 1 (0 to 1)       | 1 (0 to 1)       | -8.4% (-14.4% to -0.8%)   |
| 8  | Democratic Republic of the Congo      | Adverse effects of medical treatment            | 0 (0 to 0)       | 0 (0 to 0)       | 0% (0% to 0%)             |
| 9  | Democratic Republic of the Congo      | Conflict and terrorism                          | 2 (1 to 7)       | 11 (5 to 26)     | NA                        |
| 10 | Democratic Republic of the Congo      | Cyclist road injuries                           | 21 (14 to 30)    | 19 (13 to 27)    | -8.8% (-15% to -2.8%)     |
| 11 | Democratic Republic of the Congo      | Drowning                                        | 0 (0 to 0)       | 0 (0 to 0)       | -25.3% (-32.8% to -17.8%) |
| 12 | Democratic Republic of the Congo      | Environmental heat and cold exposure            | 2 (1 to 3)       | 2 (1 to 3)       | -2.4% (-7.9% to 3.2%)     |
| 13 | Democratic Republic of the Congo      | Executions and police conflict                  | 0 (0 to 0)       | 0 (0 to 1)       | NA                        |
| 14 | Democratic Republic of the Congo      | Exposure to forces of nature                    | 0 (0 to 0)       | 0 (0 to 0)       | NA                        |
| 15 | Democratic Republic of the Congo      | Falls                                           | 37 (29 to 47)    | 44 (35 to 56)    | 18.9% (14.6% to 23.3%)    |
| 16 | Democratic Republic of the Congo      | Fire, heat, and hot substances                  | 1 (1 to 2)       | 1 (0 to 1)       | -9% (-14.5% to -4%)       |
| 17 | Democratic Republic of the Congo      | Foreign body in eyes                            | 0 (0 to 0)       | 0 (0 to 0)       | 0% (-1% to 0.9%)          |
| 18 | Democratic Republic of the Congo      | Foreign body in other body part                 | 4 (2 to 7)       | 3 (2 to 7)       | -8% (-13.4% to -2.8%)     |
| 19 | Democratic Republic of the Congo      | Motor vehicle road injuries                     | 47 (36 to 60)    | 40 (31 to 52)    | -13.9% (-20% to -7.8%)    |
| 20 | Democratic Republic of the Congo      | Motorcyclist road injuries                      | 8 (6 to 10)      | 7 (5 to 9)       | -11% (-19.7% to -2.2%)    |
| 21 | Democratic Republic of the Congo      | Non-venomous animal contact                     | 7 (4 to 12)      | 8 (5 to 13)      | 5.7% (0.5% to 10.5%)      |
| 22 | Democratic Republic of the Congo      | Other exposure to mechanical forces             | 14 (8 to 23)     | 13 (8 to 22)     | -5.8% (-11.3% to -0.9%)   |
| 23 | Democratic Republic of the Congo      | Other road injuries                             | 1 (1 to 3)       | 1 (1 to 2)       | -1.8% (-10% to 7.3%)      |
| 24 | Democratic Republic of the Congo      | Other transport injuries                        | 5 (4 to 7)       | 5 (4 to 7)       | 2.6% (-3.1% to 8.8%)      |
| 25 | Democratic Republic of the Congo      | Other unintentional injuries                    | 7 (5 to 11)      | 7 (4 to 11)      | -3.4% (-9.5% to 3.4%)     |
| 26 | Democratic Republic of the Congo      | Pedestrian road injuries                        | 44 (34 to 55)    | 41 (31 to 51)    | -6.5% (-11.9% to -1.1%)   |
| 27 | Democratic Republic of the Congo      | Physical violence by firearm                    | 0 (0 to 0)       | 0 (0 to 0)       | 2.3% (-6.8% to 12.9%)     |
| 28 | Democratic Republic of the Congo      | Physical violence by other means                | 5 (3 to 7)       | 4 (3 to 6)       | -8.8% (-14.3% to -3.1%)   |
| 29 | Democratic Republic of the Congo      | Physical violence by sharp object               | 2 (1 to 3)       | 2 (1 to 3)       | -5.3% (-13.1% to 3.2%)    |
| 30 | Democratic Republic of the Congo      | Poisoning by carbon monoxide                    | 0 (0 to 0)       | 0 (0 to 0)       | 7% (-3.8% to 19%)         |
| 31 | Democratic Republic of the Congo      | Poisoning by other means                        | 0 (0 to 0)       | 0 (0 to 0)       | -18.1% (-24.6% to -11.5%) |
| 32 | Democratic Republic of the Congo      | Pulmonary aspiration and foreign body in airway | 0 (0 to 1)       | 0 (0 to 1)       | -13.9% (-22.2% to -3%)    |
| 33 | Democratic Republic of the Congo      | Self-harm by firearm                            | 0 (0 to 0)       | 0 (0 to 0)       | 14.3% (1.6% to 31.3%)     |
| 34 | Democratic Republic of the Congo      | Self-harm by other specified means              | 1 (1 to 2)       | 1 (1 to 2)       | 1.4% (-4% to 6.7%)        |
| 35 | Democratic Republic of the Congo      | Unintentional firearm injuries                  | 1 (1 to 2)       | 1 (1 to 2)       | -9.6% (-16.2% to -2.4%)   |
| 36 | Democratic Republic of the Congo      | Venomous animal contact                         | 1 (0 to 3)       | 2 (0 to 4)       | 11.3% (4% to 20.1%)       |
| 37 | Denmark                               | Adverse effects of medical treatment            | 0 (0 to 0)       | 0 (0 to 0)       | 0% (0% to 0%)             |
| 38 | Denmark                               | Conflict and terrorism                          | 0 (0 to 0)       | 0 (0 to 0)       | NA                        |
| 39 | Denmark                               | Cyclist road injuries                           | 37 (28 to 48)    | 19 (13 to 25)    | -49% (-57.1% to -41.2%)   |
| 40 | Denmark                               | Drowning                                        | 0 (0 to 0)       | 0 (0 to 0)       | 72.2% (56.3% to 89.4%)    |
| 41 | Denmark                               | Environmental heat and cold exposure            | 2 (1 to 3)       | 2 (1 to 3)       | 1.3% (-2.4% to 5.4%)      |
| 42 | Denmark                               | Executions and police conflict                  | 0 (0 to 0)       | 0 (0 to 0)       | NA                        |
| 43 | Denmark                               | Exposure to forces of nature                    | 0 (0 to 0)       | 0 (0 to 0)       | NA                        |
| 44 | Denmark                               | Falls                                           | 306 (246 to 379) | 259 (198 to 333) | -15.3% (-21.6% to -8.4%)  |
| 45 |                                       |                                                 |                  |                  |                           |
| 46 |                                       |                                                 |                  |                  |                           |

|    |          |                                                 |                |               |                           |
|----|----------|-------------------------------------------------|----------------|---------------|---------------------------|
| 1  |          |                                                 |                |               |                           |
| 2  | Denmark  | Fire, heat, and hot substances                  | 3 (2 to 4)     | 2 (1 to 4)    | -13.7% (-19.1% to -8.2%)  |
| 3  | Denmark  | Foreign body in eyes                            | 0 (0 to 0)     | 0 (0 to 0)    | 0.4% (0.1% to 0.9%)       |
| 4  | Denmark  | Foreign body in other body part                 | 2 (1 to 3)     | 2 (1 to 3)    | 0.8% (-3.7% to 5.7%)      |
| 5  | Denmark  | Motor vehicle road injuries                     | 34 (27 to 43)  | 18 (14 to 24) | -46.6% (-54.6% to -38.7%) |
| 6  | Denmark  | Motorcyclist road injuries                      | 9 (7 to 12)    | 7 (5 to 10)   | -22.1% (-35% to -6.9%)    |
| 7  | Denmark  | Non-venomous animal contact                     | 2 (1 to 4)     | 2 (1 to 4)    | -4.7% (-8.5% to -0.3%)    |
| 8  | Denmark  | Other exposure to mechanical forces             | 47 (29 to 74)  | 44 (26 to 70) | -7.2% (-14.4% to -0.9%)   |
| 9  | Denmark  | Other road injuries                             | 1 (1 to 2)     | 1 (1 to 2)    | -4.2% (-18.5% to 11.7%)   |
| 10 | Denmark  | Other transport injuries                        | 5 (4 to 7)     | 5 (3 to 6)    | -14.8% (-22.2% to -7%)    |
| 11 | Denmark  | Other unintentional injuries                    | 28 (18 to 43)  | 22 (14 to 36) | -21.3% (-29.2% to -14.8%) |
| 12 | Denmark  | Pedestrian road injuries                        | 8 (6 to 11)    | 6 (4 to 8)    | -26.8% (-39.3% to -13%)   |
| 13 | Denmark  | Physical violence by firearm                    | 0 (0 to 1)     | 1 (0 to 1)    | 36.1% (21.1% to 52.9%)    |
| 14 | Denmark  | Physical violence by other means                | 17 (12 to 24)  | 13 (9 to 20)  | -19.9% (-27.7% to -12%)   |
| 15 | Denmark  | Physical violence by sharp object               | 2 (1 to 3)     | 1 (1 to 2)    | -13.8% (-25.4% to -3.6%)  |
| 16 | Denmark  | Poisoning by carbon monoxide                    | 0 (0 to 0)     | 0 (0 to 0)    | 17.3% (7.5% to 28.2%)     |
| 17 | Denmark  | Poisoning by other means                        | 0 (0 to 0)     | 0 (0 to 0)    | -1.3% (-7.3% to 5.4%)     |
| 18 | Denmark  | Pulmonary aspiration and foreign body in airway | 1 (1 to 2)     | 1 (0 to 2)    | -5% (-13.8% to 4%)        |
| 19 | Denmark  | Self-harm by firearm                            | 1 (0 to 1)     | 0 (0 to 1)    | -50.8% (-57.9% to -42.9%) |
| 20 | Denmark  | Self-harm by other specified means              | 5 (3 to 7)     | 2 (1 to 3)    | -53.6% (-56.7% to -50.4%) |
| 21 | Denmark  | Unintentional firearm injuries                  | 1 (1 to 2)     | 1 (1 to 2)    | 3.5% (-7.1% to 14%)       |
| 22 | Denmark  | Venomous animal contact                         | 1 (0 to 2)     | 1 (0 to 2)    | -6.6% (-11.7% to -1.5%)   |
| 23 | Djibouti | Adverse effects of medical treatment            | 0 (0 to 0)     | 0 (0 to 0)    | 0% (0% to 0%)             |
| 24 | Djibouti | Conflict and terrorism                          | 55 (17 to 139) | 0 (0 to 0)    | NA                        |
| 25 | Djibouti | Cyclist road injuries                           | 31 (20 to 47)  | 34 (22 to 50) | 9.3% (1.5% to 17.2%)      |
| 26 | Djibouti | Drowning                                        | 0 (0 to 0)     | 0 (0 to 0)    | -9.6% (-16.6% to -2.1%)   |
| 27 | Djibouti | Environmental heat and cold exposure            | 0 (0 to 1)     | 0 (0 to 1)    | -6.4% (-13.3% to -0.1%)   |
| 28 | Djibouti | Executions and police conflict                  | 0 (0 to 0)     | 1 (0 to 2)    | NA                        |
| 29 | Djibouti | Exposure to forces of nature                    | 0 (0 to 0)     | 0 (0 to 0)    | NA                        |
| 30 | Djibouti | Falls                                           | 23 (15 to 36)  | 27 (18 to 43) | 18.5% (13.8% to 24%)      |
| 31 | Djibouti | Fire, heat, and hot substances                  | 0 (0 to 1)     | 0 (0 to 1)    | -15.3% (-20.7% to -10.4%) |
| 32 | Djibouti | Foreign body in eyes                            | 0 (0 to 0)     | 0 (0 to 0)    | 0.4% (-0.1% to 1.1%)      |
| 33 | Djibouti | Foreign body in other body part                 | 3 (1 to 7)     | 3 (1 to 7)    | 4.5% (-1.4% to 10.6%)     |
| 34 | Djibouti | Motor vehicle road injuries                     | 49 (33 to 69)  | 46 (30 to 64) | -7% (-13.6% to 0.5%)      |
| 35 | Djibouti | Motorcyclist road injuries                      | 20 (14 to 28)  | 23 (16 to 32) | 15.9% (7.3% to 24.8%)     |
| 36 | Djibouti | Non-venomous animal contact                     | 5 (2 to 10)    | 5 (2 to 10)   | -4% (-8.6% to 0.9%)       |
| 37 | Djibouti | Other exposure to mechanical forces             | 33 (17 to 58)  | 29 (15 to 53) | -10.8% (-16% to -5.5%)    |
| 38 | Djibouti | Other road injuries                             | 1 (1 to 3)     | 2 (1 to 3)    | 10.1% (0.8% to 19.5%)     |
| 39 | Djibouti | Other transport injuries                        | 3 (2 to 4)     | 3 (2 to 4)    | -3.5% (-8.8% to 2%)       |
| 40 | Djibouti | Other unintentional injuries                    | 3 (2 to 5)     | 2 (1 to 4)    | -12.6% (-17.8% to -6.2%)  |
| 41 | Djibouti | Pedestrian road injuries                        | 74 (54 to 96)  | 63 (47 to 83) | -14.4% (-19.7% to -8.5%)  |
| 42 | Djibouti | Physical violence by firearm                    | 0 (0 to 0)     | 0 (0 to 0)    | 42.3% (26.9% to 61.9%)    |
| 43 | Djibouti | Physical violence by other means                | 10 (7 to 16)   | 10 (7 to 16)  | -0.3% (-6.6% to 7%)       |
| 44 | Djibouti | Physical violence by sharp object               | 3 (1 to 5)     | 3 (1 to 5)    | 3.5% (-4.9% to 12.3%)     |
| 45 |          |                                                 |                |               |                           |
| 46 |          |                                                 |                |               |                           |



|    |                    |                                                 |               |               |                           |
|----|--------------------|-------------------------------------------------|---------------|---------------|---------------------------|
| 1  |                    |                                                 |               |               |                           |
| 2  | Djibouti           | Poisoning by carbon monoxide                    | 0 (0 to 0)    | 0 (0 to 0)    | 13.6% (1.9% to 26.9%)     |
| 3  | Djibouti           | Poisoning by other means                        | 0 (0 to 0)    | 0 (0 to 0)    | -19.9% (-26.7% to -12.1%) |
| 4  | Djibouti           | Pulmonary aspiration and foreign body in airway | 0 (0 to 0)    | 0 (0 to 0)    | -11.3% (-20.3% to -0.4%)  |
| 5  | Djibouti           | Self-harm by firearm                            | 0 (0 to 0)    | 0 (0 to 0)    | 32.1% (22.1% to 45.2%)    |
| 6  | Djibouti           | Self-harm by other specified means              | 0 (0 to 0)    | 0 (0 to 0)    | 10.9% (4.7% to 17.7%)     |
| 7  | Djibouti           | Unintentional firearm injuries                  | 1 (0 to 2)    | 1 (0 to 2)    | -18.7% (-25.5% to -10.9%) |
| 8  | Djibouti           | Venomous animal contact                         | 1 (0 to 3)    | 1 (0 to 2)    | -9.3% (-16.1% to -3.2%)   |
| 9  | Dominica           | Adverse effects of medical treatment            | 0 (0 to 0)    | 0 (0 to 0)    | 0% (0% to 0%)             |
| 10 | Dominica           | Conflict and terrorism                          | 0 (0 to 0)    | 0 (0 to 0)    | NA                        |
| 11 | Dominica           | Cyclist road injuries                           | 31 (22 to 43) | 28 (19 to 38) | -11.3% (-19.5% to -3.3%)  |
| 12 | Dominica           | Drowning                                        | 0 (0 to 1)    | 0 (0 to 1)    | 5.7% (-3.1% to 14.9%)     |
| 13 | Dominica           | Environmental heat and cold exposure            | 11 (8 to 15)  | 11 (8 to 16)  | 4.6% (0.6% to 9.5%)       |
| 14 | Dominica           | Executions and police conflict                  | 0 (0 to 0)    | 0 (0 to 0)    | NA                        |
| 15 | Dominica           | Exposure to forces of nature                    | 0 (0 to 0)    | 0 (0 to 0)    | NA                        |
| 16 | Dominica           | Falls                                           | 44 (34 to 57) | 58 (45 to 75) | 32.8% (27.3% to 37.6%)    |
| 17 | Dominica           | Fire, heat, and hot substances                  | 4 (3 to 7)    | 4 (2 to 6)    | -6.6% (-11% to -2.1%)     |
| 18 | Dominica           | Foreign body in eyes                            | 0 (0 to 0)    | 0 (0 to 0)    | 1.7% (0.6% to 3.5%)       |
| 19 | Dominica           | Foreign body in other body part                 | 1 (1 to 3)    | 1 (1 to 3)    | -2.8% (-7.8% to 4.1%)     |
| 20 | Dominica           | Motor vehicle road injuries                     | 33 (25 to 44) | 30 (22 to 39) | -11.7% (-20.4% to -2.3%)  |
| 21 | Dominica           | Motorcyclist road injuries                      | 22 (17 to 29) | 26 (20 to 34) | 19.4% (6.3% to 33.2%)     |
| 22 | Dominica           | Non-venomous animal contact                     | 3 (2 to 6)    | 3 (2 to 5)    | -11.9% (-17% to -6%)      |
| 23 | Dominica           | Other exposure to mechanical forces             | 30 (18 to 50) | 36 (21 to 59) | 18.1% (11.6% to 25%)      |
| 24 | Dominica           | Other road injuries                             | 4 (2 to 7)    | 4 (2 to 6)    | -7.1% (-15.5% to 2.1%)    |
| 25 | Dominica           | Other transport injuries                        | 4 (3 to 6)    | 5 (3 to 6)    | 4.1% (-2.7% to 11.5%)     |
| 26 | Dominica           | Other unintentional injuries                    | 15 (9 to 23)  | 14 (9 to 23)  | -2.4% (-8% to 3.3%)       |
| 27 | Dominica           | Pedestrian road injuries                        | 19 (14 to 24) | 15 (11 to 19) | -21.7% (-28.8% to -14.8%) |
| 28 | Dominica           | Physical violence by firearm                    | 1 (0 to 1)    | 1 (1 to 2)    | 97.2% (75.5% to 126.1%)   |
| 29 | Dominica           | Physical violence by other means                | 10 (7 to 15)  | 13 (9 to 19)  | 32.4% (23.8% to 43.7%)    |
| 30 | Dominica           | Physical violence by sharp object               | 4 (3 to 6)    | 6 (4 to 9)    | 42.5% (29% to 60.2%)      |
| 31 | Dominica           | Poisoning by carbon monoxide                    | 0 (0 to 0)    | 0 (0 to 0)    | 2.3% (-11.1% to 17%)      |
| 32 | Dominica           | Poisoning by other means                        | 0 (0 to 1)    | 0 (0 to 0)    | -55.4% (-61.2% to -48.9%) |
| 33 | Dominica           | Pulmonary aspiration and foreign body in airway | 0 (0 to 1)    | 0 (0 to 1)    | -16.1% (-24.8% to -8%)    |
| 34 | Dominica           | Self-harm by firearm                            | 0 (0 to 0)    | 0 (0 to 0)    | 9.1% (-2.9% to 22.7%)     |
| 35 | Dominica           | Self-harm by other specified means              | 0 (0 to 1)    | 0 (0 to 1)    | -0.7% (-7.8% to 6.5%)     |
| 36 | Dominica           | Unintentional firearm injuries                  | 4 (2 to 6)    | 4 (2 to 6)    | 13.1% (3.1% to 23.8%)     |
| 37 | Dominica           | Venomous animal contact                         | 5 (3 to 10)   | 5 (2 to 9)    | -11.3% (-15.9% to -6.3%)  |
| 38 | Dominican Republic | Adverse effects of medical treatment            | 0 (0 to 0)    | 0 (0 to 0)    | 0% (0% to 0%)             |
| 39 | Dominican Republic | Conflict and terrorism                          | 0 (0 to 1)    | 0 (0 to 0)    | NA                        |
| 40 | Dominican Republic | Cyclist road injuries                           | 31 (22 to 43) | 29 (20 to 41) | -5.8% (-16.5% to 4.7%)    |
| 41 | Dominican Republic | Drowning                                        | 0 (0 to 0)    | 0 (0 to 1)    | 46.8% (30.6% to 65.9%)    |
| 42 | Dominican Republic | Environmental heat and cold exposure            | 10 (7 to 15)  | 11 (8 to 16)  | 7.7% (3.4% to 12%)        |
| 43 | Dominican Republic | Executions and police conflict                  | 0 (0 to 0)    | 0 (0 to 0)    | NA                        |
| 44 | Dominican Republic | Exposure to forces of nature                    | 0 (0 to 0)    | 0 (0 to 0)    | NA                        |
| 45 |                    |                                                 |               |               |                           |
| 46 |                    |                                                 |               |               |                           |

|    |                    |                                                 |                |                 |                           |
|----|--------------------|-------------------------------------------------|----------------|-----------------|---------------------------|
| 1  |                    |                                                 |                |                 |                           |
| 2  | Dominican Republic | Falls                                           | 38 (30 to 49)  | 61 (47 to 80)   | 60.8% (55.3% to 66.6%)    |
| 3  | Dominican Republic | Fire, heat, and hot substances                  | 3 (2 to 6)     | 4 (2 to 6)      | 4.5% (-0.5% to 9.5%)      |
| 4  | Dominican Republic | Foreign body in eyes                            | 0 (0 to 0)     | 0 (0 to 0)      | 0.6% (0.1% to 1.3%)       |
| 5  | Dominican Republic | Foreign body in other body part                 | 1 (1 to 3)     | 1 (1 to 3)      | -4.9% (-10.4% to 1.1%)    |
| 6  | Dominican Republic | Motor vehicle road injuries                     | 48 (37 to 62)  | 67 (51 to 84)   | 38.5% (24% to 54.6%)      |
| 7  | Dominican Republic | Motorcyclist road injuries                      | 18 (14 to 24)  | 35 (27 to 46)   | 91.1% (68.6% to 119.8%)   |
| 8  | Dominican Republic | Non-venomous animal contact                     | 3 (2 to 6)     | 3 (2 to 5)      | -17.1% (-21.3% to -12.2%) |
| 9  | Dominican Republic | Other exposure to mechanical forces             | 30 (17 to 50)  | 40 (23 to 68)   | 36.2% (28.4% to 44.9%)    |
| 10 | Dominican Republic | Other road injuries                             | 4 (3 to 7)     | 4 (2 to 7)      | -0.7% (-12.3% to 11.7%)   |
| 11 | Dominican Republic | Other transport injuries                        | 5 (3 to 6)     | 5 (3 to 6)      | 1.1% (-4.7% to 7%)        |
| 12 | Dominican Republic | Other unintentional injuries                    | 17 (11 to 27)  | 18 (12 to 28)   | 3.1% (-3.6% to 11%)       |
| 13 | Dominican Republic | Pedestrian road injuries                        | 15 (11 to 19)  | 15 (11 to 19)   | 2.6% (-7.8% to 14.5%)     |
| 14 | Dominican Republic | Physical violence by firearm                    | 1 (1 to 1)     | 3 (2 to 5)      | 329% (264.4% to 405.6%)   |
| 15 | Dominican Republic | Physical violence by other means                | 11 (8 to 17)   | 17 (12 to 25)   | 48.7% (33.5% to 63.4%)    |
| 16 | Dominican Republic | Physical violence by sharp object               | 5 (3 to 7)     | 8 (5 to 12)     | 69.3% (48.7% to 93.2%)    |
| 17 | Dominican Republic | Poisoning by carbon monoxide                    | 0 (0 to 0)     | 0 (0 to 0)      | 34.4% (20.1% to 50.5%)    |
| 18 | Dominican Republic | Poisoning by other means                        | 0 (0 to 0)     | 0 (0 to 0)      | 11.5% (3.5% to 18.8%)     |
| 19 | Dominican Republic | Pulmonary aspiration and foreign body in airway | 0 (0 to 1)     | 0 (0 to 1)      | -26.8% (-35% to -18.9%)   |
| 20 | Dominican Republic | Self-harm by firearm                            | 0 (0 to 0)     | 0 (0 to 1)      | 84% (64.8% to 106.5%)     |
| 21 | Dominican Republic | Self-harm by other specified means              | 0 (0 to 1)     | 0 (0 to 1)      | 39.7% (29.7% to 50.7%)    |
| 22 | Dominican Republic | Unintentional firearm injuries                  | 5 (3 to 7)     | 7 (4 to 11)     | 54.9% (42.1% to 71.5%)    |
| 23 | Dominican Republic | Venomous animal contact                         | 6 (3 to 10)    | 5 (2 to 9)      | -15.8% (-19.8% to -10.8%) |
| 24 | Ecuador            | Adverse effects of medical treatment            | 0 (0 to 0)     | 0 (0 to 0)      | 0% (0% to 0%)             |
| 25 | Ecuador            | Conflict and terrorism                          | 0 (0 to 1)     | 0 (0 to 0)      | NA                        |
| 26 | Ecuador            | Cyclist road injuries                           | 14 (9 to 19)   | 15 (10 to 20)   | 6.3% (-3.2% to 17.5%)     |
| 27 | Ecuador            | Drowning                                        | 0 (0 to 0)     | 0 (0 to 1)      | 17.5% (3.6% to 32.9%)     |
| 28 | Ecuador            | Environmental heat and cold exposure            | 8 (6 to 11)    | 8 (6 to 12)     | 6% (1.9% to 11.6%)        |
| 29 | Ecuador            | Executions and police conflict                  | 0 (0 to 0)     | 0 (0 to 0)      | NA                        |
| 30 | Ecuador            | Exposure to forces of nature                    | 0 (0 to 0)     | 0 (0 to 0)      | NA                        |
| 31 | Ecuador            | Falls                                           | 80 (63 to 103) | 109 (85 to 140) | 36.2% (30.5% to 42.2%)    |
| 32 | Ecuador            | Fire, heat, and hot substances                  | 3 (2 to 5)     | 3 (2 to 5)      | -6.3% (-12.7% to -0.1%)   |
| 33 | Ecuador            | Foreign body in eyes                            | 0 (0 to 0)     | 0 (0 to 0)      | -0.2% (-0.7% to 0.1%)     |
| 34 | Ecuador            | Foreign body in other body part                 | 2 (1 to 5)     | 2 (1 to 5)      | -8.5% (-16.5% to -0.4%)   |
| 35 | Ecuador            | Motor vehicle road injuries                     | 17 (12 to 22)  | 21 (16 to 28)   | 29.2% (16.9% to 44.8%)    |
| 36 | Ecuador            | Motorcyclist road injuries                      | 7 (5 to 9)     | 15 (11 to 19)   | 119.9% (91.5% to 153%)    |
| 37 | Ecuador            | Non-venomous animal contact                     | 3 (2 to 6)     | 3 (2 to 5)      | -8.3% (-13.4% to -2.7%)   |
| 38 | Ecuador            | Other exposure to mechanical forces             | 32 (19 to 51)  | 31 (18 to 50)   | -2.6% (-9.9% to 4.6%)     |
| 39 | Ecuador            | Other road injuries                             | 3 (2 to 5)     | 3 (2 to 5)      | 2.2% (-8.4% to 15.7%)     |
| 40 | Ecuador            | Other transport injuries                        | 4 (3 to 5)     | 5 (4 to 6)      | 26.6% (15.6% to 40.3%)    |
| 41 | Ecuador            | Other unintentional injuries                    | 21 (14 to 32)  | 16 (11 to 26)   | -20.7% (-27% to -14.5%)   |
| 42 | Ecuador            | Pedestrian road injuries                        | 32 (25 to 39)  | 22 (17 to 27)   | -31.2% (-36.8% to -24.8%) |
| 43 | Ecuador            | Physical violence by firearm                    | 1 (1 to 1)     | 1 (1 to 2)      | 35.3% (12.9% to 62.4%)    |
| 44 | Ecuador            | Physical violence by other means                | 12 (8 to 17)   | 12 (8 to 18)    | 2.4% (-9.1% to 15.1%)     |
| 45 |                    |                                                 |                |                 |                           |
| 46 |                    |                                                 |                |                 |                           |

|    |             |                                                 |                 |               |                           |
|----|-------------|-------------------------------------------------|-----------------|---------------|---------------------------|
| 1  |             |                                                 |                 |               |                           |
| 2  | Ecuador     | Physical violence by sharp object               | 5 (4 to 8)      | 4 (3 to 7)    | -20.7% (-32.2% to -9.2%)  |
| 3  | Ecuador     | Poisoning by carbon monoxide                    | 0 (0 to 0)      | 0 (0 to 0)    | 47.4% (28.9% to 66.5%)    |
| 4  | Ecuador     | Poisoning by other means                        | 0 (0 to 0)      | 0 (0 to 0)    | -5.2% (-12.2% to 2.6%)    |
| 5  | Ecuador     | Pulmonary aspiration and foreign body in airway | 1 (0 to 1)      | 1 (0 to 1)    | -27.7% (-36.2% to -20.1%) |
| 6  | Ecuador     | Self-harm by firearm                            | 0 (0 to 0)      | 0 (0 to 0)    | 54.6% (28.6% to 79.2%)    |
| 7  | Ecuador     | Self-harm by other specified means              | 0 (0 to 1)      | 1 (1 to 1)    | 100.3% (82.7% to 119.6%)  |
| 8  | Ecuador     | Unintentional firearm injuries                  | 3 (2 to 5)      | 3 (2 to 5)    | -12.6% (-21.8% to -2.5%)  |
| 9  | Egypt       | Venomous animal contact                         | 6 (3 to 10)     | 5 (3 to 10)   | -3.2% (-7.6% to 2.2%)     |
| 10 | Egypt       | Adverse effects of medical treatment            | 0 (0 to 0)      | 0 (0 to 0)    | 0% (0% to 0%)             |
| 11 | Egypt       | Conflict and terrorism                          | 0 (0 to 1)      | 4 (2 to 9)    | NA                        |
| 12 | Egypt       | Cyclist road injuries                           | 14 (9 to 20)    | 14 (9 to 20)  | -2.8% (-12.3% to 8.5%)    |
| 13 | Egypt       | Drowning                                        | 0 (0 to 0)      | 0 (0 to 0)    | 42.6% (18.8% to 69.5%)    |
| 14 | Egypt       | Environmental heat and cold exposure            | 3 (2 to 4)      | 3 (2 to 4)    | -2% (-7.8% to 3.8%)       |
| 15 | Egypt       | Executions and police conflict                  | 0 (0 to 0)      | 0 (0 to 0)    | NA                        |
| 16 | Egypt       | Exposure to forces of nature                    | 0 (0 to 0)      | 0 (0 to 0)    | NA                        |
| 17 | Egypt       | Falls                                           | 48 (36 to 63)   | 68 (52 to 91) | 43.1% (37.5% to 49%)      |
| 18 | Egypt       | Fire, heat, and hot substances                  | 1 (0 to 1)      | 1 (0 to 1)    | -15.3% (-22.7% to -7.5%)  |
| 19 | Egypt       | Foreign body in eyes                            | 0 (0 to 0)      | 0 (0 to 0)    | 1.5% (0.6% to 2.9%)       |
| 20 | Egypt       | Foreign body in other body part                 | 1 (1 to 3)      | 1 (1 to 3)    | 0.2% (-5.4% to 5.6%)      |
| 21 | Egypt       | Motor vehicle road injuries                     | 45 (35 to 57)   | 39 (30 to 49) | -14.2% (-21.5% to -6.7%)  |
| 22 | Egypt       | Motorcyclist road injuries                      | 12 (9 to 15)    | 13 (10 to 17) | 10% (-1.1% to 22%)        |
| 23 | Egypt       | Non-venomous animal contact                     | 3 (2 to 6)      | 3 (2 to 5)    | -6.6% (-12% to -0.6%)     |
| 24 | Egypt       | Other exposure to mechanical forces             | 17 (10 to 27)   | 18 (11 to 30) | 10.2% (5% to 15.8%)       |
| 25 | Egypt       | Other road injuries                             | 2 (1 to 3)      | 2 (1 to 3)    | 4.2% (-7.8% to 16.6%)     |
| 26 | Egypt       | Other transport injuries                        | 8 (6 to 10)     | 5 (4 to 7)    | -31.8% (-37.8% to -24.9%) |
| 27 | Egypt       | Other unintentional injuries                    | 15 (10 to 24)   | 14 (9 to 23)  | -7.2% (-13.2% to -0.7%)   |
| 28 | Egypt       | Pedestrian road injuries                        | 34 (26 to 43)   | 29 (23 to 37) | -13.3% (-21.3% to -5.2%)  |
| 29 | Egypt       | Physical violence by firearm                    | 0 (0 to 0)      | 0 (0 to 1)    | 113.8% (84.5% to 145.9%)  |
| 30 | Egypt       | Physical violence by other means                | 9 (6 to 13)     | 9 (6 to 13)   | -0.5% (-5.9% to 5.3%)     |
| 31 | Egypt       | Physical violence by sharp object               | 1 (1 to 2)      | 1 (1 to 2)    | -8.6% (-15.8% to -0.8%)   |
| 32 | Egypt       | Poisoning by carbon monoxide                    | 0 (0 to 0)      | 0 (0 to 0)    | 51.7% (34.4% to 71.7%)    |
| 33 | Egypt       | Poisoning by other means                        | 0 (0 to 0)      | 0 (0 to 0)    | -4.9% (-13.8% to 5.1%)    |
| 34 | Egypt       | Pulmonary aspiration and foreign body in airway | 0 (0 to 1)      | 0 (0 to 1)    | -19.7% (-27.6% to -10.6%) |
| 35 | Egypt       | Self-harm by firearm                            | 0 (0 to 0)      | 0 (0 to 0)    | 52.8% (38.5% to 70.3%)    |
| 36 | Egypt       | Self-harm by other specified means              | 1 (0 to 1)      | 1 (1 to 1)    | 11% (4.5% to 18.4%)       |
| 37 | Egypt       | Unintentional firearm injuries                  | 2 (1 to 3)      | 2 (1 to 2)    | -11.7% (-19.5% to -4%)    |
| 38 | Egypt       | Venomous animal contact                         | 2 (1 to 4)      | 2 (1 to 4)    | -17.7% (-26.3% to -11.3%) |
| 39 | El Salvador | Adverse effects of medical treatment            | 0 (0 to 0)      | 0 (0 to 0)    | 0% (0% to 0%)             |
| 40 | El Salvador | Conflict and terrorism                          | 131 (53 to 301) | 0 (0 to 0)    | NA                        |
| 41 | El Salvador | Cyclist road injuries                           | 25 (17 to 35)   | 19 (13 to 26) | -26.4% (-35.3% to -17.1%) |
| 42 | El Salvador | Drowning                                        | 0 (0 to 0)      | 0 (0 to 1)    | 48.6% (33.7% to 66%)      |
| 43 | El Salvador | Environmental heat and cold exposure            | 3 (2 to 4)      | 3 (2 to 4)    | 2.2% (-2.6% to 6.4%)      |
| 44 | El Salvador | Executions and police conflict                  | 0 (0 to 0)      | 0 (0 to 0)    | NA                        |
| 45 |             |                                                 |                 |               |                           |
| 46 |             |                                                 |                 |               |                           |

|    |                   |                                                 |                |                 |                           |
|----|-------------------|-------------------------------------------------|----------------|-----------------|---------------------------|
| 1  |                   |                                                 |                |                 |                           |
| 2  | El Salvador       | Exposure to forces of nature                    | 0 (0 to 0)     | 0 (0 to 0)      | NA                        |
| 3  | El Salvador       | Falls                                           | 91 (71 to 118) | 109 (84 to 141) | 20.2% (15.5% to 25.3%)    |
| 4  | El Salvador       | Fire, heat, and hot substances                  | 4 (2 to 6)     | 3 (2 to 5)      | -15% (-23.5% to -7.7%)    |
| 5  | El Salvador       | Foreign body in eyes                            | 0 (0 to 0)     | 0 (0 to 0)      | -1.4% (-2.7% to -0.6%)    |
| 6  | El Salvador       | Foreign body in other body part                 | 1 (1 to 3)     | 1 (0 to 2)      | -11.3% (-15.9% to -5.6%)  |
| 7  | El Salvador       | Motor vehicle road injuries                     | 46 (35 to 58)  | 39 (30 to 50)   | -15.2% (-22.6% to -7.3%)  |
| 8  | El Salvador       | Motorcyclist road injuries                      | 8 (6 to 10)    | 8 (6 to 11)     | 7.3% (-3.7% to 19.5%)     |
| 9  | El Salvador       | Non-venomous animal contact                     | 6 (3 to 11)    | 5 (3 to 9)      | -20.7% (-24.9% to -16.3%) |
| 10 | El Salvador       | Other exposure to mechanical forces             | 30 (17 to 50)  | 33 (18 to 54)   | 6.7% (-1.1% to 14.5%)     |
| 11 | El Salvador       | Other road injuries                             | 6 (4 to 10)    | 5 (3 to 7)      | -23.5% (-31.6% to -14.7%) |
| 12 | El Salvador       | Other transport injuries                        | 9 (7 to 12)    | 6 (5 to 7)      | -38% (-42% to -33.7%)     |
| 13 | El Salvador       | Other unintentional injuries                    | 13 (8 to 21)   | 8 (5 to 14)     | -35.3% (-43.5% to -27%)   |
| 14 | El Salvador       | Pedestrian road injuries                        | 40 (31 to 49)  | 27 (21 to 34)   | -31.6% (-38.1% to -24.9%) |
| 15 | El Salvador       | Physical violence by firearm                    | 5 (3 to 7)     | 15 (10 to 20)   | 200.7% (156.9% to 257.3%) |
| 16 | El Salvador       | Physical violence by other means                | 41 (29 to 58)  | 60 (41 to 86)   | 47.2% (32.7% to 65.5%)    |
| 17 | El Salvador       | Physical violence by sharp object               | 13 (9 to 19)   | 17 (10 to 26)   | 29.1% (12.9% to 49.4%)    |
| 18 | El Salvador       | Poisoning by carbon monoxide                    | 0 (0 to 0)     | 0 (0 to 0)      | 28.3% (15.1% to 45%)      |
| 19 | El Salvador       | Poisoning by other means                        | 0 (0 to 0)     | 0 (0 to 0)      | 1.8% (-6.6% to 11%)       |
| 20 | El Salvador       | Pulmonary aspiration and foreign body in airway | 1 (0 to 1)     | 0 (0 to 1)      | -59.8% (-67.4% to -51.4%) |
| 21 | El Salvador       | Self-harm by firearm                            | 0 (0 to 0)     | 0 (0 to 0)      | 28% (7.7% to 52.2%)       |
| 22 | El Salvador       | Self-harm by other specified means              | 1 (1 to 1)     | 1 (0 to 1)      | -19.8% (-28.1% to -11.6%) |
| 23 | El Salvador       | Unintentional firearm injuries                  | 2 (1 to 3)     | 2 (1 to 4)      | 17.5% (6% to 30.5%)       |
| 24 | El Salvador       | Venomous animal contact                         | 7 (3 to 14)    | 6 (3 to 12)     | -15.5% (-19.5% to -10.8%) |
| 25 | Equatorial Guinea | Adverse effects of medical treatment            | 0 (0 to 0)     | 0 (0 to 0)      | 0% (0% to 0%)             |
| 26 | Equatorial Guinea | Conflict and terrorism                          | 0 (0 to 0)     | 0 (0 to 0)      | NA                        |
| 27 | Equatorial Guinea | Cyclist road injuries                           | 17 (11 to 24)  | 22 (15 to 31)   | 32% (20.8% to 45.4%)      |
| 28 | Equatorial Guinea | Drowning                                        | 0 (0 to 0)     | 0 (0 to 0)      | -9.6% (-22.3% to 3.9%)    |
| 29 | Equatorial Guinea | Environmental heat and cold exposure            | 2 (2 to 3)     | 2 (2 to 3)      | -5.4% (-13.1% to 3.2%)    |
| 30 | Equatorial Guinea | Executions and police conflict                  | 0 (0 to 0)     | 0 (0 to 0)      | NA                        |
| 31 | Equatorial Guinea | Exposure to forces of nature                    | 0 (0 to 0)     | 0 (0 to 0)      | NA                        |
| 32 | Equatorial Guinea | Falls                                           | 34 (26 to 42)  | 47 (37 to 60)   | 40% (33.8% to 46.2%)      |
| 33 | Equatorial Guinea | Fire, heat, and hot substances                  | 1 (1 to 2)     | 1 (0 to 1)      | -19% (-27.9% to -10.3%)   |
| 34 | Equatorial Guinea | Foreign body in eyes                            | 0 (0 to 0)     | 0 (0 to 0)      | 2.7% (1.1% to 5.4%)       |
| 35 | Equatorial Guinea | Foreign body in other body part                 | 4 (2 to 8)     | 3 (2 to 6)      | -13.9% (-21.4% to -8.2%)  |
| 36 | Equatorial Guinea | Motor vehicle road injuries                     | 39 (30 to 50)  | 46 (35 to 59)   | 18.7% (8.8% to 29.5%)     |
| 37 | Equatorial Guinea | Motorcyclist road injuries                      | 10 (7 to 13)   | 11 (8 to 15)    | 12.9% (-1.2% to 29%)      |
| 38 | Equatorial Guinea | Non-venomous animal contact                     | 10 (6 to 16)   | 4 (3 to 7)      | -54% (-58.7% to -48.8%)   |
| 39 | Equatorial Guinea | Other exposure to mechanical forces             | 16 (9 to 26)   | 15 (9 to 24)    | -7.6% (-17% to 3.4%)      |
| 40 | Equatorial Guinea | Other road injuries                             | 1 (1 to 2)     | 1 (1 to 3)      | 39.1% (23.7% to 58.4%)    |
| 41 | Equatorial Guinea | Other transport injuries                        | 6 (4 to 7)     | 5 (3 to 6)      | -15% (-23.4% to -6.5%)    |
| 42 | Equatorial Guinea | Other unintentional injuries                    | 8 (5 to 12)    | 7 (4 to 11)     | -17.8% (-28.5% to -7.3%)  |
| 43 | Equatorial Guinea | Pedestrian road injuries                        | 39 (30 to 49)  | 34 (26 to 43)   | -13% (-19.5% to -6.3%)    |
| 44 | Equatorial Guinea | Physical violence by firearm                    | 0 (0 to 0)     | 0 (0 to 0)      | 46.2% (23.3% to 70.3%)    |
| 45 |                   |                                                 |                |                 |                           |
| 46 |                   |                                                 |                |                 |                           |

|    |                   |                                                 |                    |               |                           |
|----|-------------------|-------------------------------------------------|--------------------|---------------|---------------------------|
| 1  |                   |                                                 |                    |               |                           |
| 2  | Equatorial Guinea | Physical violence by other means                | 6 (4 to 9)         | 6 (4 to 9)    | -0.8% (-8.1% to 6.9%)     |
| 3  | Equatorial Guinea | Physical violence by sharp object               | 2 (2 to 4)         | 3 (2 to 4)    | 3.8% (-5.9% to 15.2%)     |
| 4  | Equatorial Guinea | Poisoning by carbon monoxide                    | 0 (0 to 0)         | 0 (0 to 0)    | 27.4% (6.6% to 50.9%)     |
| 5  | Equatorial Guinea | Poisoning by other means                        | 0 (0 to 0)         | 0 (0 to 0)    | -26.5% (-37.6% to -14.2%) |
| 6  | Equatorial Guinea | Pulmonary aspiration and foreign body in airway | 1 (0 to 1)         | 0 (0 to 0)    | -52.9% (-60.6% to -44.2%) |
| 7  | Equatorial Guinea | Self-harm by firearm                            | 0 (0 to 0)         | 0 (0 to 1)    | 38.2% (19% to 62.5%)      |
| 8  | Equatorial Guinea | Self-harm by other specified means              | 1 (1 to 2)         | 1 (1 to 2)    | -6.1% (-14% to 1.2%)      |
| 9  | Equatorial Guinea | Unintentional firearm injuries                  | 2 (1 to 3)         | 1 (1 to 2)    | -18.1% (-29.8% to -5.8%)  |
| 10 | Eritrea           | Venomous animal contact                         | 2 (1 to 4)         | 1 (0 to 2)    | -47.8% (-54.6% to -38.9%) |
| 11 | Eritrea           | Adverse effects of medical treatment            | 0 (0 to 0)         | 0 (0 to 0)    | 0% (0% to 0%)             |
| 12 | Eritrea           | Conflict and terrorism                          | 1166 (381 to 2867) | 0 (0 to 0)    | NA                        |
| 13 | Eritrea           | Cyclist road injuries                           | 34 (23 to 51)      | 35 (23 to 52) | 3% (-4.8% to 11.7%)       |
| 14 | Eritrea           | Drowning                                        | 0 (0 to 0)         | 0 (0 to 0)    | -19.2% (-23.9% to -13.3%) |
| 15 | Eritrea           | Environmental heat and cold exposure            | 0 (0 to 1)         | 0 (0 to 1)    | -8.7% (-14.9% to -2.7%)   |
| 16 | Eritrea           | Executions and police conflict                  | 0 (0 to 0)         | 0 (0 to 0)    | NA                        |
| 17 | Eritrea           | Exposure to forces of nature                    | 0 (0 to 0)         | 0 (0 to 0)    | NA                        |
| 18 | Eritrea           | Falls                                           | 21 (13 to 32)      | 26 (16 to 40) | 25.5% (21.7% to 29.9%)    |
| 19 | Eritrea           | Fire, heat, and hot substances                  | 0 (0 to 1)         | 0 (0 to 1)    | -12.9% (-17.8% to -8.5%)  |
| 20 | Eritrea           | Foreign body in eyes                            | 0 (0 to 0)         | 0 (0 to 0)    | 0.6% (0.1% to 1.5%)       |
| 21 | Eritrea           | Foreign body in other body part                 | 3 (1 to 7)         | 3 (1 to 7)    | 2.1% (-2.9% to 8.7%)      |
| 22 | Eritrea           | Motor vehicle road injuries                     | 41 (27 to 59)      | 44 (29 to 62) | 7.3% (-1% to 16.9%)       |
| 23 | Eritrea           | Motorcyclist road injuries                      | 21 (15 to 29)      | 21 (15 to 29) | 2.5% (-5.4% to 10.4%)     |
| 24 | Eritrea           | Non-venomous animal contact                     | 8 (4 to 15)        | 7 (3 to 13)   | -14% (-17.5% to -10%)     |
| 25 | Eritrea           | Other exposure to mechanical forces             | 30 (15 to 55)      | 28 (14 to 51) | -6.3% (-11% to -0.5%)     |
| 26 | Eritrea           | Other road injuries                             | 1 (1 to 3)         | 2 (1 to 3)    | 12.1% (2% to 23.2%)       |
| 27 | Eritrea           | Other transport injuries                        | 3 (2 to 4)         | 3 (2 to 4)    | -7.2% (-12% to -2.2%)     |
| 28 | Eritrea           | Other unintentional injuries                    | 3 (2 to 5)         | 3 (2 to 5)    | -13.4% (-18.6% to -8.2%)  |
| 29 | Eritrea           | Pedestrian road injuries                        | 67 (49 to 88)      | 67 (49 to 88) | -0.1% (-6.8% to 6.6%)     |
| 30 | Eritrea           | Physical violence by firearm                    | 0 (0 to 0)         | 0 (0 to 0)    | 48.8% (35.8% to 64.4%)    |
| 31 | Eritrea           | Physical violence by other means                | 7 (5 to 11)        | 10 (6 to 15)  | 34.8% (25.9% to 43.5%)    |
| 32 | Eritrea           | Physical violence by sharp object               | 2 (1 to 4)         | 3 (1 to 5)    | 37.8% (27.4% to 50.8%)    |
| 33 | Eritrea           | Poisoning by carbon monoxide                    | 0 (0 to 0)         | 0 (0 to 0)    | 14.6% (2.6% to 27.3%)     |
| 34 | Eritrea           | Poisoning by other means                        | 0 (0 to 0)         | 0 (0 to 0)    | -20.4% (-26.8% to -13.3%) |
| 35 | Eritrea           | Pulmonary aspiration and foreign body in airway | 0 (0 to 0)         | 0 (0 to 0)    | -11.3% (-20.6% to -0.1%)  |
| 36 | Eritrea           | Self-harm by firearm                            | 0 (0 to 0)         | 0 (0 to 0)    | 34.6% (25% to 46.2%)      |
| 37 | Eritrea           | Self-harm by other specified means              | 0 (0 to 0)         | 0 (0 to 0)    | 16.2% (9.6% to 22.4%)     |
| 38 | Eritrea           | Unintentional firearm injuries                  | 1 (0 to 2)         | 1 (0 to 2)    | -20.7% (-27.7% to -12.9%) |
| 39 | Eritrea           | Venomous animal contact                         | 1 (0 to 4)         | 1 (0 to 3)    | -15.4% (-21.5% to -9.2%)  |
| 40 | Estonia           | Adverse effects of medical treatment            | 0 (0 to 0)         | 0 (0 to 0)    | 0% (0% to 0%)             |
| 41 | Estonia           | Conflict and terrorism                          | 0 (0 to 0)         | 0 (0 to 0)    | NA                        |
| 42 | Estonia           | Cyclist road injuries                           | 69 (49 to 93)      | 42 (30 to 57) | -39.7% (-48.4% to -30.2%) |
| 43 | Estonia           | Drowning                                        | 1 (1 to 2)         | 1 (0 to 1)    | -18.1% (-29.3% to -7.9%)  |
| 44 | Estonia           | Environmental heat and cold exposure            | 12 (9 to 16)       | 10 (8 to 15)  | -11.1% (-16.3% to -6.1%)  |
| 45 |                   |                                                 |                    |               |                           |
| 46 |                   |                                                 |                    |               |                           |

|    |          |                                                 |                  |                  |                           |
|----|----------|-------------------------------------------------|------------------|------------------|---------------------------|
| 1  |          |                                                 |                  |                  |                           |
| 2  | Estonia  | Executions and police conflict                  | 0 (0 to 0)       | 0 (0 to 0)       | NA                        |
| 3  | Estonia  | Exposure to forces of nature                    | 0 (0 to 0)       | 0 (0 to 0)       | NA                        |
| 4  | Estonia  | Falls                                           | 338 (266 to 430) | 257 (201 to 337) | -23.9% (-28.5% to -19.1%) |
| 5  | Estonia  | Fire, heat, and hot substances                  | 7 (4 to 12)      | 4 (2 to 6)       | -47.2% (-53.5% to -41.1%) |
| 6  | Estonia  | Foreign body in eyes                            | 0 (0 to 0)       | 0 (0 to 0)       | 1.6% (0.8% to 2.7%)       |
| 7  | Estonia  | Foreign body in other body part                 | 2 (1 to 4)       | 2 (1 to 4)       | 1.6% (-4% to 8.7%)        |
| 8  | Estonia  | Motor vehicle road injuries                     | 200 (156 to 249) | 83 (64 to 106)   | -58.5% (-65% to -52%)     |
| 9  | Estonia  | Motorcyclist road injuries                      | 16 (11 to 21)    | 10 (7 to 14)     | -34.5% (-46.4% to -21.6%) |
| 10 | Estonia  | Non-venomous animal contact                     | 4 (2 to 7)       | 4 (2 to 6)       | -7.6% (-12.3% to -2.5%)   |
| 11 | Estonia  | Other exposure to mechanical forces             | 101 (64 to 159)  | 80 (49 to 126)   | -20.8% (-29.2% to -13.2%) |
| 12 | Estonia  | Other road injuries                             | 2 (1 to 4)       | 2 (1 to 3)       | -14.1% (-26.6% to 0.3%)   |
| 13 | Estonia  | Other transport injuries                        | 8 (6 to 10)      | 6 (4 to 8)       | -30.2% (-38.5% to -21.1%) |
| 14 | Estonia  | Other unintentional injuries                    | 30 (19 to 48)    | 26 (16 to 44)    | -11.4% (-23.2% to 0.2%)   |
| 15 | Estonia  | Pedestrian road injuries                        | 86 (66 to 107)   | 30 (22 to 38)    | -65.1% (-70.1% to -59%)   |
| 16 | Estonia  | Physical violence by firearm                    | 1 (1 to 1)       | 0 (0 to 1)       | -57.3% (-70% to -39.2%)   |
| 17 | Estonia  | Physical violence by other means                | 48 (35 to 68)    | 24 (17 to 33)    | -50.6% (-56.9% to -42.5%) |
| 18 | Estonia  | Physical violence by sharp object               | 7 (5 to 11)      | 3 (2 to 5)       | -59.7% (-68.1% to -50.2%) |
| 19 | Estonia  | Poisoning by carbon monoxide                    | 0 (0 to 0)       | 0 (0 to 0)       | 17.6% (-3.5% to 38.6%)    |
| 20 | Estonia  | Poisoning by other means                        | 0 (0 to 1)       | 0 (0 to 1)       | 2.4% (-11% to 14.6%)      |
| 21 | Estonia  | Pulmonary aspiration and foreign body in airway | 2 (1 to 3)       | 1 (0 to 1)       | -45.1% (-52.3% to -36.7%) |
| 22 | Estonia  | Self-harm by firearm                            | 2 (1 to 3)       | 1 (0 to 1)       | -52.8% (-60.4% to -44.7%) |
| 23 | Estonia  | Self-harm by other specified means              | 6 (4 to 9)       | 3 (2 to 5)       | -42.7% (-46.8% to -37.8%) |
| 24 | Estonia  | Unintentional firearm injuries                  | 1 (1 to 2)       | 1 (1 to 2)       | -12.5% (-26.1% to 1.4%)   |
| 25 | Estonia  | Venomous animal contact                         | 3 (1 to 6)       | 3 (1 to 5)       | -9.2% (-14.1% to -4%)     |
| 26 | Eswatini | Adverse effects of medical treatment            | 0 (0 to 0)       | 0 (0 to 0)       | 0% (0% to 0%)             |
| 27 | Eswatini | Conflict and terrorism                          | 0 (0 to 0)       | 0 (0 to 0)       | NA                        |
| 28 | Eswatini | Cyclist road injuries                           | 11 (7 to 16)     | 14 (9 to 21)     | 26.9% (16.7% to 38.5%)    |
| 29 | Eswatini | Drowning                                        | 0 (0 to 0)       | 0 (0 to 0)       | 0.9% (-5.7% to 7.6%)      |
| 30 | Eswatini | Environmental heat and cold exposure            | 0 (0 to 1)       | 0 (0 to 1)       | 2.6% (-3.5% to 8.5%)      |
| 31 | Eswatini | Executions and police conflict                  | 0 (0 to 0)       | 0 (0 to 0)       | NA                        |
| 32 | Eswatini | Exposure to forces of nature                    | 0 (0 to 0)       | 0 (0 to 0)       | NA                        |
| 33 | Eswatini | Falls                                           | 19 (12 to 28)    | 23 (14 to 35)    | 23% (18.1% to 28.8%)      |
| 34 | Eswatini | Fire, heat, and hot substances                  | 0 (0 to 0)       | 0 (0 to 0)       | 3.3% (-4% to 9.8%)        |
| 35 | Eswatini | Foreign body in eyes                            | 0 (0 to 0)       | 0 (0 to 0)       | -0.1% (-0.8% to 0.8%)     |
| 36 | Eswatini | Foreign body in other body part                 | 4 (2 to 8)       | 4 (2 to 8)       | -1.4% (-6.3% to 4.2%)     |
| 37 | Eswatini | Motor vehicle road injuries                     | 31 (21 to 43)    | 39 (26 to 55)    | 27.8% (18.1% to 38.3%)    |
| 38 | Eswatini | Motorcyclist road injuries                      | 9 (6 to 13)      | 14 (10 to 19)    | 50.6% (35.9% to 68%)      |
| 39 | Eswatini | Non-venomous animal contact                     | 4 (2 to 7)       | 3 (2 to 7)       | -2.7% (-7.5% to 3.3%)     |
| 40 | Eswatini | Other exposure to mechanical forces             | 29 (14 to 52)    | 28 (14 to 51)    | -2.9% (-8.2% to 3%)       |
| 41 | Eswatini | Other road injuries                             | 1 (1 to 2)       | 1 (1 to 3)       | 13.6% (3.6% to 23.7%)     |
| 42 | Eswatini | Other transport injuries                        | 3 (2 to 5)       | 3 (2 to 5)       | 4.7% (-2.2% to 10.9%)     |
| 43 | Eswatini | Other unintentional injuries                    | 2 (1 to 4)       | 2 (1 to 4)       | -7% (-12.1% to -1.6%)     |
| 44 | Eswatini | Pedestrian road injuries                        | 37 (28 to 48)    | 43 (31 to 57)    | 16.5% (7.7% to 24.7%)     |
| 45 |          |                                                 |                  |                  |                           |
| 46 |          |                                                 |                  |                  |                           |

|    |          |                                                 |                   |               |                           |
|----|----------|-------------------------------------------------|-------------------|---------------|---------------------------|
| 1  |          |                                                 |                   |               |                           |
| 2  | Eswatini | Physical violence by firearm                    | 0 (0 to 1)        | 0 (0 to 1)    | -15% (-24.3% to -4.6%)    |
| 3  | Eswatini | Physical violence by other means                | 17 (11 to 26)     | 16 (10 to 24) | -10.5% (-19.1% to -1.2%)  |
| 4  | Eswatini | Physical violence by sharp object               | 6 (3 to 10)       | 5 (3 to 9)    | -7.2% (-17.8% to 4.7%)    |
| 5  | Eswatini | Poisoning by carbon monoxide                    | 0 (0 to 0)        | 0 (0 to 0)    | 7.6% (-3% to 19.7%)       |
| 6  | Eswatini | Poisoning by other means                        | 0 (0 to 0)        | 0 (0 to 0)    | -6.4% (-14.5% to 1.8%)    |
| 7  | Eswatini | Pulmonary aspiration and foreign body in airway | 0 (0 to 0)        | 0 (0 to 0)    | 2.4% (-6.8% to 12.2%)     |
| 8  | Eswatini | Self-harm by firearm                            | 0 (0 to 0)        | 0 (0 to 0)    | 61.6% (46.7% to 81.4%)    |
| 9  | Eswatini | Self-harm by other specified means              | 0 (0 to 0)        | 0 (0 to 0)    | 40.7% (30.3% to 51.9%)    |
| 10 | Eswatini | Unintentional firearm injuries                  | 1 (0 to 1)        | 0 (0 to 1)    | -9.8% (-17.8% to 0%)      |
| 11 | Ethiopia | Venomous animal contact                         | 0 (0 to 1)        | 0 (0 to 1)    | -11.6% (-18.1% to -4.4%)  |
| 12 | Ethiopia | Adverse effects of medical treatment            | 0 (0 to 0)        | 0 (0 to 0)    | 0% (0% to 0%)             |
| 13 | Ethiopia | Conflict and terrorism                          | 701 (291 to 1568) | 1 (0 to 3)    | NA                        |
| 14 | Ethiopia | Cyclist road injuries                           | 53 (39 to 73)     | 40 (30 to 54) | -24.5% (-27.4% to -21.4%) |
| 15 | Ethiopia | Drowning                                        | 0 (0 to 0)        | 0 (0 to 0)    | -32.4% (-37.8% to -27.4%) |
| 16 | Ethiopia | Environmental heat and cold exposure            | 3 (2 to 4)        | 2 (2 to 3)    | -14% (-19.7% to -8.2%)    |
| 17 | Ethiopia | Executions and police conflict                  | 0 (0 to 0)        | 0 (0 to 1)    | NA                        |
| 18 | Ethiopia | Exposure to forces of nature                    | 0 (0 to 0)        | 0 (0 to 0)    | NA                        |
| 19 | Ethiopia | Falls                                           | 49 (39 to 63)     | 52 (41 to 68) | 6.7% (3.7% to 9.7%)       |
| 20 | Ethiopia | Fire, heat, and hot substances                  | 3 (2 to 4)        | 2 (1 to 3)    | -24.3% (-29% to -19.8%)   |
| 21 | Ethiopia | Foreign body in eyes                            | 0 (0 to 0)        | 0 (0 to 0)    | 0.4% (0.1% to 1%)         |
| 22 | Ethiopia | Foreign body in other body part                 | 3 (2 to 7)        | 3 (2 to 7)    | 0.8% (-3.5% to 5%)        |
| 23 | Ethiopia | Motor vehicle road injuries                     | 40 (29 to 54)     | 29 (21 to 38) | -27.2% (-30.6% to -23.4%) |
| 24 | Ethiopia | Motorcyclist road injuries                      | 18 (13 to 24)     | 13 (10 to 17) | -28.3% (-31.8% to -24.3%) |
| 25 | Ethiopia | Non-venomous animal contact                     | 14 (8 to 25)      | 10 (6 to 17)  | -32.5% (-35.1% to -29.7%) |
| 26 | Ethiopia | Other exposure to mechanical forces             | 22 (13 to 35)     | 20 (12 to 32) | -8.8% (-12.9% to -4.6%)   |
| 27 | Ethiopia | Other road injuries                             | 2 (1 to 3)        | 1 (1 to 3)    | -4.3% (-10.5% to 2.4%)    |
| 28 | Ethiopia | Other transport injuries                        | 7 (6 to 10)       | 6 (4 to 8)    | -20.4% (-26.2% to -14.9%) |
| 29 | Ethiopia | Other unintentional injuries                    | 11 (8 to 18)      | 8 (5 to 13)   | -27.8% (-31.7% to -24.7%) |
| 30 | Ethiopia | Pedestrian road injuries                        | 65 (49 to 82)     | 40 (30 to 52) | -38.1% (-40.7% to -35.3%) |
| 31 | Ethiopia | Physical violence by firearm                    | 0 (0 to 1)        | 0 (0 to 0)    | -26.8% (-30.9% to -21.5%) |
| 32 | Ethiopia | Physical violence by other means                | 13 (9 to 19)      | 10 (7 to 14)  | -28.1% (-30.7% to -25.5%) |
| 33 | Ethiopia | Physical violence by sharp object               | 4 (3 to 6)        | 3 (2 to 5)    | -21.5% (-24.9% to -17.5%) |
| 34 | Ethiopia | Poisoning by carbon monoxide                    | 0 (0 to 0)        | 0 (0 to 0)    | -6.7% (-15.7% to 2.8%)    |
| 35 | Ethiopia | Poisoning by other means                        | 0 (0 to 0)        | 0 (0 to 0)    | -43.7% (-48.1% to -38.9%) |
| 36 | Ethiopia | Pulmonary aspiration and foreign body in airway | 0 (0 to 1)        | 0 (0 to 1)    | -24.5% (-31.4% to -16.9%) |
| 37 | Ethiopia | Self-harm by firearm                            | 0 (0 to 0)        | 0 (0 to 0)    | -23.7% (-30.1% to -16.2%) |
| 38 | Ethiopia | Self-harm by other specified means              | 2 (1 to 3)        | 1 (1 to 1)    | -40.3% (-42.5% to -37.7%) |
| 39 | Ethiopia | Unintentional firearm injuries                  | 3 (2 to 4)        | 2 (1 to 3)    | -30.5% (-36% to -24%)     |
| 40 | Ethiopia | Venomous animal contact                         | 5 (2 to 11)       | 4 (1 to 8)    | -31.7% (-37.3% to -27%)   |
| 41 | Fiji     | Adverse effects of medical treatment            | 0 (0 to 0)        | 0 (0 to 0)    | 0% (0% to 0%)             |
| 42 | Fiji     | Conflict and terrorism                          | 0 (0 to 0)        | 0 (0 to 0)    | NA                        |
| 43 | Fiji     | Cyclist road injuries                           | 11 (7 to 15)      | 11 (7 to 15)  | -0.9% (-7.5% to 6.6%)     |
| 44 | Fiji     | Drowning                                        | 0 (0 to 1)        | 0 (0 to 1)    | 2.5% (-4.9% to 10.5%)     |
| 45 |          |                                                 |                   |               |                           |
| 46 |          |                                                 |                   |               |                           |

|    |         |                                                 |                  |                  |                           |
|----|---------|-------------------------------------------------|------------------|------------------|---------------------------|
| 1  |         |                                                 |                  |                  |                           |
| 2  | Fiji    | Environmental heat and cold exposure            | 2 (1 to 3)       | 2 (1 to 3)       | -0.3% (-5.2% to 5%)       |
| 3  | Fiji    | Executions and police conflict                  | 0 (0 to 0)       | 0 (0 to 0)       | NA                        |
| 4  | Fiji    | Exposure to forces of nature                    | 0 (0 to 0)       | 0 (0 to 0)       | NA                        |
| 5  | Fiji    | Falls                                           | 46 (35 to 61)    | 61 (48 to 82)    | 34.1% (29.6% to 39.1%)    |
| 6  | Fiji    | Fire, heat, and hot substances                  | 2 (1 to 3)       | 2 (1 to 3)       | -3.4% (-8.7% to 1.9%)     |
| 7  | Fiji    | Foreign body in eyes                            | 0 (0 to 0)       | 0 (0 to 0)       | -0.3% (-1.1% to 0.1%)     |
| 8  | Fiji    | Foreign body in other body part                 | 1 (0 to 1)       | 1 (0 to 1)       | -3.6% (-8% to 1%)         |
| 9  | Fiji    | Motor vehicle road injuries                     | 28 (21 to 35)    | 22 (17 to 28)    | -20.4% (-26.1% to -14.4%) |
| 10 | Fiji    | Motorcyclist road injuries                      | 13 (9 to 17)     | 14 (11 to 19)    | 12.6% (3.8% to 22.2%)     |
| 11 | Fiji    | Non-venomous animal contact                     | 4 (2 to 8)       | 4 (2 to 7)       | -18% (-22.4% to -13.8%)   |
| 12 | Fiji    | Other exposure to mechanical forces             | 12 (7 to 21)     | 11 (6 to 18)     | -14.1% (-18.9% to -9.5%)  |
| 13 | Fiji    | Other road injuries                             | 1 (1 to 2)       | 1 (1 to 2)       | -2.1% (-11% to 8.5%)      |
| 14 | Fiji    | Other transport injuries                        | 6 (5 to 8)       | 6 (4 to 8)       | -4% (-9% to 1.2%)         |
| 15 | Fiji    | Other unintentional injuries                    | 8 (6 to 13)      | 7 (4 to 11)      | -19.3% (-23.4% to -14.8%) |
| 16 | Fiji    | Pedestrian road injuries                        | 9 (6 to 11)      | 8 (6 to 10)      | -12.2% (-19.1% to -4.1%)  |
| 17 | Fiji    | Physical violence by firearm                    | 0 (0 to 0)       | 0 (0 to 0)       | 25.8% (12.8% to 40.3%)    |
| 18 | Fiji    | Physical violence by other means                | 25 (18 to 35)    | 27 (19 to 38)    | 7.8% (0.2% to 15.9%)      |
| 19 | Fiji    | Physical violence by sharp object               | 1 (1 to 2)       | 1 (1 to 2)       | 3.1% (-6.5% to 14.6%)     |
| 20 | Fiji    | Poisoning by carbon monoxide                    | 0 (0 to 0)       | 0 (0 to 0)       | 13.7% (3% to 24.5%)       |
| 21 | Fiji    | Poisoning by other means                        | 0 (0 to 0)       | 0 (0 to 0)       | -7.3% (-14.5% to -0.5%)   |
| 22 | Fiji    | Pulmonary aspiration and foreign body in airway | 0 (0 to 0)       | 0 (0 to 0)       | -4.9% (-14.1% to 6.2%)    |
| 23 | Fiji    | Self-harm by firearm                            | 0 (0 to 1)       | 0 (0 to 1)       | 12.3% (-3% to 29.3%)      |
| 24 | Fiji    | Self-harm by other specified means              | 2 (1 to 3)       | 2 (1 to 3)       | -9.3% (-15.6% to -2.4%)   |
| 25 | Fiji    | Unintentional firearm injuries                  | 2 (1 to 3)       | 2 (1 to 3)       | -5.6% (-12.4% to 1.3%)    |
| 26 | Fiji    | Venomous animal contact                         | 3 (1 to 6)       | 3 (1 to 5)       | -10.3% (-16% to -3.6%)    |
| 27 | Finland | Adverse effects of medical treatment            | 0 (0 to 0)       | 0 (0 to 0)       | 0% (0% to 0%)             |
| 28 | Finland | Conflict and terrorism                          | 1 (0 to 1)       | 0 (0 to 0)       | NA                        |
| 29 | Finland | Cyclist road injuries                           | 38 (28 to 50)    | 21 (15 to 29)    | -44% (-51.6% to -36%)     |
| 30 | Finland | Drowning                                        | 0 (0 to 0)       | 0 (0 to 0)       | 69.6% (52.5% to 88.8%)    |
| 31 | Finland | Environmental heat and cold exposure            | 3 (2 to 4)       | 3 (2 to 4)       | 4.3% (-0.8% to 10.5%)     |
| 32 | Finland | Executions and police conflict                  | 0 (0 to 0)       | 0 (0 to 0)       | NA                        |
| 33 | Finland | Exposure to forces of nature                    | 0 (0 to 0)       | 0 (0 to 0)       | NA                        |
| 34 | Finland | Falls                                           | 409 (320 to 521) | 418 (324 to 539) | 2.2% (-2.4% to 7%)        |
| 35 | Finland | Fire, heat, and hot substances                  | 4 (2 to 7)       | 3 (2 to 5)       | -28.2% (-34.5% to -22.1%) |
| 36 | Finland | Foreign body in eyes                            | 0 (0 to 0)       | 0 (0 to 0)       | 1% (0.3% to 2%)           |
| 37 | Finland | Foreign body in other body part                 | 2 (1 to 4)       | 2 (1 to 4)       | 0.3% (-4.2% to 5.3%)      |
| 38 | Finland | Motor vehicle road injuries                     | 44 (33 to 56)    | 23 (17 to 30)    | -47.9% (-54.8% to -40.7%) |
| 39 | Finland | Motorcyclist road injuries                      | 12 (9 to 15)     | 10 (7 to 13)     | -16.3% (-29% to -2.4%)    |
| 40 | Finland | Non-venomous animal contact                     | 3 (2 to 6)       | 3 (1 to 5)       | -17.7% (-21.5% to -13.5%) |
| 41 | Finland | Other exposure to mechanical forces             | 53 (32 to 85)    | 50 (30 to 80)    | -6.2% (-12% to 0%)        |
| 42 | Finland | Other road injuries                             | 1 (1 to 2)       | 1 (0 to 2)       | -17.1% (-27.4% to -5.7%)  |
| 43 | Finland | Other transport injuries                        | 8 (7 to 11)      | 6 (4 to 7)       | -33.6% (-39.5% to -25.8%) |
| 44 | Finland | Other unintentional injuries                    | 32 (21 to 51)    | 25 (16 to 40)    | -22.5% (-28.9% to -16.8%) |
| 45 |         |                                                 |                  |                  |                           |
| 46 |         |                                                 |                  |                  |                           |



|    |         |                                                 |                  |                  |                           |
|----|---------|-------------------------------------------------|------------------|------------------|---------------------------|
| 1  |         |                                                 |                  |                  |                           |
| 2  | Finland | Pedestrian road injuries                        | 11 (8 to 14)     | 7 (5 to 10)      | -33.3% (-43.3% to -22.7%) |
| 3  | Finland | Physical violence by firearm                    | 1 (0 to 1)       | 1 (0 to 1)       | 16.6% (0.4% to 34.5%)     |
| 4  | Finland | Physical violence by other means                | 27 (19 to 38)    | 18 (13 to 26)    | -30.9% (-37.8% to -23.3%) |
| 5  | Finland | Physical violence by sharp object               | 3 (2 to 5)       | 2 (1 to 3)       | -40.6% (-49.2% to -31.5%) |
| 6  | Finland | Poisoning by carbon monoxide                    | 0 (0 to 0)       | 0 (0 to 0)       | -75.6% (-82.8% to -66.4%) |
| 7  | Finland | Poisoning by other means                        | 0 (0 to 1)       | 0 (0 to 0)       | -44.5% (-53.9% to -34.6%) |
| 8  | Finland | Pulmonary aspiration and foreign body in airway | 1 (1 to 2)       | 1 (1 to 2)       | -21% (-28.4% to -13.7%)   |
| 9  | Finland | Self-harm by firearm                            | 2 (1 to 3)       | 1 (0 to 1)       | -67% (-72.4% to -61.2%)   |
| 10 | Finland | Self-harm by other specified means              | 6 (4 to 9)       | 4 (3 to 6)       | -35.7% (-40.4% to -30.5%) |
| 11 | Finland | Unintentional firearm injuries                  | 1 (1 to 2)       | 1 (1 to 2)       | 0% (-10.8% to 11.7%)      |
| 12 | Finland | Venomous animal contact                         | 1 (0 to 2)       | 1 (0 to 2)       | -14.4% (-19.2% to -8.2%)  |
| 13 | France  | Adverse effects of medical treatment            | 0 (0 to 0)       | 0 (0 to 0)       | 0% (0% to 0%)             |
| 14 | France  | Conflict and terrorism                          | 0 (0 to 0)       | 0 (0 to 0)       | NA                        |
| 15 | France  | Cyclist road injuries                           | 25 (18 to 34)    | 20 (14 to 27)    | -19.9% (-31.2% to -7.6%)  |
| 16 | France  | Drowning                                        | 0 (0 to 0)       | 0 (0 to 0)       | 93% (74.9% to 109%)       |
| 17 | France  | Environmental heat and cold exposure            | 2 (2 to 3)       | 2 (1 to 3)       | -11.7% (-16.6% to -6.3%)  |
| 18 | France  | Executions and police conflict                  | 0 (0 to 0)       | 0 (0 to 0)       | NA                        |
| 19 | France  | Exposure to forces of nature                    | 0 (0 to 0)       | 0 (0 to 0)       | NA                        |
| 20 | France  | Falls                                           | 319 (254 to 402) | 329 (259 to 419) | 3.1% (-1.4% to 8.1%)      |
| 21 | France  | Fire, heat, and hot substances                  | 3 (2 to 4)       | 2 (1 to 4)       | -9.7% (-15.3% to -4.5%)   |
| 22 | France  | Foreign body in eyes                            | 0 (0 to 0)       | 0 (0 to 0)       | 0.2% (0% to 0.6%)         |
| 23 | France  | Foreign body in other body part                 | 2 (1 to 3)       | 2 (1 to 3)       | 5.5% (0.8% to 10.6%)      |
| 24 | France  | Motor vehicle road injuries                     | 49 (38 to 63)    | 22 (16 to 28)    | -55.8% (-63% to -47.4%)   |
| 25 | France  | Motorcyclist road injuries                      | 12 (9 to 16)     | 11 (8 to 14)     | -8.7% (-23.7% to 9.3%)    |
| 26 | France  | Non-venomous animal contact                     | 2 (1 to 4)       | 2 (1 to 4)       | -6.2% (-10.2% to -1.9%)   |
| 27 | France  | Other exposure to mechanical forces             | 51 (31 to 80)    | 48 (28 to 76)    | -6.7% (-12.7% to -0.3%)   |
| 28 | France  | Other road injuries                             | 1 (1 to 2)       | 1 (1 to 2)       | -10.8% (-25.1% to 4%)     |
| 29 | France  | Other transport injuries                        | 5 (4 to 6)       | 5 (4 to 7)       | 10.4% (5.4% to 16.3%)     |
| 30 | France  | Other unintentional injuries                    | 33 (22 to 51)    | 26 (17 to 41)    | -21.8% (-27.1% to -16.6%) |
| 31 | France  | Pedestrian road injuries                        | 19 (14 to 25)    | 7 (5 to 10)      | -62.3% (-68.4% to -54.9%) |
| 32 | France  | Physical violence by firearm                    | 0 (0 to 1)       | 1 (0 to 1)       | 29% (15.1% to 45.2%)      |
| 33 | France  | Physical violence by other means                | 16 (12 to 23)    | 13 (9 to 19)     | -20.8% (-27.8% to -14.6%) |
| 34 | France  | Physical violence by sharp object               | 1 (1 to 2)       | 1 (1 to 2)       | -13.2% (-23.3% to -3.8%)  |
| 35 | France  | Poisoning by carbon monoxide                    | 0 (0 to 0)       | 0 (0 to 0)       | 11.9% (3.8% to 21.2%)     |
| 36 | France  | Poisoning by other means                        | 0 (0 to 0)       | 0 (0 to 0)       | -0.3% (-6.7% to 5%)       |
| 37 | France  | Pulmonary aspiration and foreign body in airway | 1 (1 to 2)       | 1 (1 to 2)       | -15.8% (-24.1% to -5.9%)  |
| 38 | France  | Self-harm by firearm                            | 1 (1 to 2)       | 1 (0 to 1)       | -47% (-54.4% to -38.3%)   |
| 39 | France  | Self-harm by other specified means              | 4 (3 to 7)       | 3 (2 to 5)       | -24.6% (-29.5% to -19.2%) |
| 40 | France  | Unintentional firearm injuries                  | 1 (1 to 2)       | 1 (1 to 2)       | -10.8% (-19.7% to -1.1%)  |
| 41 | France  | Venomous animal contact                         | 1 (0 to 2)       | 1 (0 to 2)       | -9.7% (-15.1% to -4.9%)   |
| 42 | Gabon   | Adverse effects of medical treatment            | 0 (0 to 0)       | 0 (0 to 0)       | 0% (0% to 0%)             |
| 43 | Gabon   | Conflict and terrorism                          | 0 (0 to 0)       | 1 (0 to 2)       | NA                        |
| 44 | Gabon   | Cyclist road injuries                           | 22 (15 to 31)    | 22 (15 to 31)    | -0.9% (-7.7% to 7.2%)     |
| 45 |         |                                                 |                  |                  |                           |
| 46 |         |                                                 |                  |                  |                           |

|    |        |                                                 |               |               |                           |
|----|--------|-------------------------------------------------|---------------|---------------|---------------------------|
| 1  |        |                                                 |               |               |                           |
| 2  | Gabon  | Drowning                                        | 0 (0 to 0)    | 0 (0 to 0)    | -16.1% (-23.7% to -8.3%)  |
| 3  | Gabon  | Environmental heat and cold exposure            | 3 (2 to 4)    | 2 (2 to 4)    | -6.9% (-11.9% to -0.7%)   |
| 4  | Gabon  | Executions and police conflict                  | 0 (0 to 0)    | 0 (0 to 0)    | NA                        |
| 5  | Gabon  | Exposure to forces of nature                    | 0 (0 to 0)    | 0 (0 to 0)    | NA                        |
| 6  | Gabon  | Falls                                           | 47 (37 to 59) | 53 (43 to 67) | 13.1% (8.9% to 16.7%)     |
| 7  | Gabon  | Fire, heat, and hot substances                  | 1 (1 to 2)    | 1 (1 to 2)    | -12.1% (-17% to -7.1%)    |
| 8  | Gabon  | Foreign body in eyes                            | 0 (0 to 0)    | 0 (0 to 0)    | -0.4% (-1.4% to 0.2%)     |
| 9  | Gabon  | Foreign body in other body part                 | 3 (2 to 6)    | 3 (2 to 6)    | -2.6% (-7.6% to 2.7%)     |
| 10 | Gabon  | Motor vehicle road injuries                     | 50 (38 to 64) | 48 (37 to 63) | -2.7% (-8.5% to 4.2%)     |
| 11 | Gabon  | Motorcyclist road injuries                      | 15 (12 to 20) | 14 (11 to 19) | -5.6% (-13.5% to 3.7%)    |
| 12 | Gabon  | Non-venomous animal contact                     | 5 (3 to 9)    | 5 (3 to 9)    | -3.7% (-8.5% to 1.2%)     |
| 13 | Gabon  | Other exposure to mechanical forces             | 17 (10 to 29) | 15 (9 to 25)  | -11.6% (-17% to -5.4%)    |
| 14 | Gabon  | Other road injuries                             | 1 (1 to 2)    | 1 (1 to 3)    | 2.8% (-5.4% to 12.4%)     |
| 15 | Gabon  | Other transport injuries                        | 6 (4 to 8)    | 5 (4 to 7)    | -11.5% (-16.3% to -6.2%)  |
| 16 | Gabon  | Other unintentional injuries                    | 8 (5 to 12)   | 7 (4 to 12)   | -9.6% (-17.1% to -2.7%)   |
| 17 | Gabon  | Pedestrian road injuries                        | 48 (37 to 60) | 40 (31 to 51) | -16.2% (-21.2% to -10.8%) |
| 18 | Gabon  | Physical violence by firearm                    | 0 (0 to 0)    | 0 (0 to 0)    | 16.3% (4% to 30.7%)       |
| 19 | Gabon  | Physical violence by other means                | 7 (5 to 11)   | 6 (4 to 9)    | -13.4% (-18.8% to -8.3%)  |
| 20 | Gabon  | Physical violence by sharp object               | 3 (2 to 4)    | 3 (2 to 4)    | -12.2% (-18.4% to -6%)    |
| 21 | Gabon  | Poisoning by carbon monoxide                    | 0 (0 to 0)    | 0 (0 to 0)    | 12.6% (2.3% to 25.7%)     |
| 22 | Gabon  | Poisoning by other means                        | 0 (0 to 0)    | 0 (0 to 0)    | -16.4% (-22.7% to -9%)    |
| 23 | Gabon  | Pulmonary aspiration and foreign body in airway | 0 (0 to 1)    | 0 (0 to 1)    | -13.6% (-21.9% to -3.1%)  |
| 24 | Gabon  | Self-harm by firearm                            | 0 (0 to 1)    | 0 (0 to 1)    | 2.7% (-8.9% to 16.5%)     |
| 25 | Gabon  | Self-harm by other specified means              | 2 (1 to 2)    | 1 (1 to 2)    | -13.3% (-18.3% to -7.9%)  |
| 26 | Gabon  | Unintentional firearm injuries                  | 2 (1 to 2)    | 1 (1 to 2)    | -11.8% (-18.5% to -4.3%)  |
| 27 | Gabon  | Venomous animal contact                         | 1 (0 to 3)    | 1 (0 to 3)    | -0.8% (-7.3% to 6.3%)     |
| 28 | Gambia | Adverse effects of medical treatment            | 0 (0 to 0)    | 0 (0 to 0)    | 0% (0% to 0%)             |
| 29 | Gambia | Conflict and terrorism                          | 0 (0 to 0)    | 0 (0 to 0)    | NA                        |
| 30 | Gambia | Cyclist road injuries                           | 21 (13 to 32) | 24 (15 to 35) | 11% (3.8% to 19.1%)       |
| 31 | Gambia | Drowning                                        | 0 (0 to 0)    | 0 (0 to 0)    | -5.7% (-12.5% to 1.3%)    |
| 32 | Gambia | Environmental heat and cold exposure            | 0 (0 to 1)    | 0 (0 to 1)    | -2.7% (-8.2% to 2.9%)     |
| 33 | Gambia | Executions and police conflict                  | 0 (0 to 0)    | 0 (0 to 0)    | NA                        |
| 34 | Gambia | Exposure to forces of nature                    | 0 (0 to 0)    | 0 (0 to 0)    | NA                        |
| 35 | Gambia | Falls                                           | 18 (12 to 26) | 21 (14 to 31) | 19% (15% to 23.3%)        |
| 36 | Gambia | Fire, heat, and hot substances                  | 0 (0 to 0)    | 0 (0 to 0)    | -2.2% (-7.2% to 2.5%)     |
| 37 | Gambia | Foreign body in eyes                            | 0 (0 to 0)    | 0 (0 to 0)    | -1% (-2.3% to -0.2%)      |
| 38 | Gambia | Foreign body in other body part                 | 4 (1 to 8)    | 4 (2 to 8)    | 2.7% (-2.6% to 8.8%)      |
| 39 | Gambia | Motor vehicle road injuries                     | 41 (28 to 57) | 45 (31 to 63) | 9.4% (1.7% to 17.2%)      |
| 40 | Gambia | Motorcyclist road injuries                      | 20 (14 to 28) | 23 (16 to 32) | 14% (6.7% to 22.4%)       |
| 41 | Gambia | Non-venomous animal contact                     | 3 (1 to 6)    | 3 (1 to 6)    | -0.6% (-5.7% to 4.5%)     |
| 42 | Gambia | Other exposure to mechanical forces             | 26 (13 to 47) | 24 (12 to 44) | -9% (-14.5% to -3.8%)     |
| 43 | Gambia | Other road injuries                             | 2 (1 to 3)    | 2 (1 to 3)    | 2.9% (-4.9% to 10.9%)     |
| 44 | Gambia | Other transport injuries                        | 3 (2 to 4)    | 3 (2 to 4)    | -0.8% (-6.7% to 6.1%)     |
| 45 |        |                                                 |               |               |                           |
| 46 |        |                                                 |               |               |                           |

|    |         |                                                 |                  |                  |                           |
|----|---------|-------------------------------------------------|------------------|------------------|---------------------------|
| 1  |         |                                                 |                  |                  |                           |
| 2  | Gambia  | Other unintentional injuries                    | 3 (2 to 5)       | 3 (2 to 5)       | -3.9% (-9.7% to 1.9%)     |
| 3  | Gambia  | Pedestrian road injuries                        | 49 (36 to 63)    | 51 (37 to 67)    | 4.8% (-1.4% to 11.3%)     |
| 4  | Gambia  | Physical violence by firearm                    | 0 (0 to 0)       | 0 (0 to 0)       | 45% (23.7% to 65.5%)      |
| 5  | Gambia  | Physical violence by other means                | 4 (3 to 6)       | 4 (3 to 6)       | 2.3% (-1.7% to 6.6%)      |
| 6  | Gambia  | Physical violence by sharp object               | 1 (1 to 2)       | 1 (1 to 2)       | 0.7% (-5.4% to 6.6%)      |
| 7  | Gambia  | Poisoning by carbon monoxide                    | 0 (0 to 0)       | 0 (0 to 0)       | 6.6% (-4% to 18.5%)       |
| 8  | Gambia  | Poisoning by other means                        | 0 (0 to 0)       | 0 (0 to 0)       | -11.3% (-17.5% to -4.5%)  |
| 9  | Gambia  | Pulmonary aspiration and foreign body in airway | 0 (0 to 0)       | 0 (0 to 0)       | 6% (-2.3% to 16.1%)       |
| 10 | Gambia  | Self-harm by firearm                            | 0 (0 to 0)       | 0 (0 to 0)       | 19.6% (12% to 27.4%)      |
| 11 | Gambia  | Self-harm by other specified means              | 0 (0 to 0)       | 0 (0 to 0)       | 16.4% (10.3% to 22.6%)    |
| 12 | Gambia  | Unintentional firearm injuries                  | 1 (0 to 2)       | 1 (0 to 2)       | -9.2% (-16.3% to -0.5%)   |
| 13 | Gambia  | Venomous animal contact                         | 0 (0 to 1)       | 0 (0 to 1)       | -0.2% (-7% to 7.2%)       |
| 14 | Georgia | Adverse effects of medical treatment            | 0 (0 to 0)       | 0 (0 to 0)       | 0% (0% to 0%)             |
| 15 | Georgia | Conflict and terrorism                          | 0 (0 to 0)       | 0 (0 to 0)       | NA                        |
| 16 | Georgia | Cyclist road injuries                           | 21 (14 to 29)    | 17 (12 to 24)    | -17.6% (-26.4% to -7.6%)  |
| 17 | Georgia | Drowning                                        | 1 (0 to 1)       | 1 (0 to 1)       | -24.3% (-33.5% to -15.2%) |
| 18 | Georgia | Environmental heat and cold exposure            | 5 (3 to 7)       | 4 (3 to 6)       | -9.1% (-17.3% to 0.6%)    |
| 19 | Georgia | Executions and police conflict                  | 0 (0 to 0)       | 0 (0 to 0)       | NA                        |
| 20 | Georgia | Exposure to forces of nature                    | 0 (0 to 0)       | 0 (0 to 0)       | NA                        |
| 21 | Georgia | Falls                                           | 189 (144 to 245) | 226 (176 to 295) | 20% (13.6% to 27.1%)      |
| 22 | Georgia | Fire, heat, and hot substances                  | 6 (4 to 10)      | 5 (3 to 8)       | -26.5% (-33.2% to -19.2%) |
| 23 | Georgia | Foreign body in eyes                            | 0 (0 to 0)       | 0 (0 to 0)       | -3.9% (-11.6% to 4.2%)    |
| 24 | Georgia | Foreign body in other body part                 | 3 (1 to 5)       | 2 (1 to 3)       | -38.7% (-44.4% to -32.2%) |
| 25 | Georgia | Motor vehicle road injuries                     | 82 (64 to 103)   | 72 (58 to 89)    | -12.1% (-20.3% to -1.6%)  |
| 26 | Georgia | Motorcyclist road injuries                      | 6 (4 to 8)       | 4 (3 to 6)       | -26.1% (-36% to -13.7%)   |
| 27 | Georgia | Non-venomous animal contact                     | 2 (1 to 4)       | 2 (1 to 4)       | -15.4% (-27.4% to 0.1%)   |
| 28 | Georgia | Other exposure to mechanical forces             | 72 (45 to 111)   | 79 (51 to 124)   | 10.4% (1.6% to 20.6%)     |
| 29 | Georgia | Other road injuries                             | 2 (1 to 3)       | 2 (1 to 4)       | 5.8% (-6.3% to 19.5%)     |
| 30 | Georgia | Other transport injuries                        | 5 (4 to 7)       | 6 (5 to 8)       | 8.4% (-4.9% to 24.7%)     |
| 31 | Georgia | Other unintentional injuries                    | 25 (16 to 40)    | 29 (19 to 45)    | 13.7% (5.4% to 23.3%)     |
| 32 | Georgia | Pedestrian road injuries                        | 27 (20 to 35)    | 30 (23 to 37)    | 9.5% (-2.7% to 24%)       |
| 33 | Georgia | Physical violence by firearm                    | 1 (0 to 1)       | 0 (0 to 1)       | -44.2% (-55% to -32.4%)   |
| 34 | Georgia | Physical violence by other means                | 17 (12 to 24)    | 13 (9 to 19)     | -21.5% (-30% to -12%)     |
| 35 | Georgia | Physical violence by sharp object               | 2 (1 to 4)       | 2 (1 to 4)       | -5.5% (-18.3% to 9.8%)    |
| 36 | Georgia | Poisoning by carbon monoxide                    | 0 (0 to 0)       | 0 (0 to 0)       | 0.6% (-14.5% to 20.7%)    |
| 37 | Georgia | Poisoning by other means                        | 0 (0 to 1)       | 0 (0 to 1)       | 18.5% (4.4% to 36.1%)     |
| 38 | Georgia | Pulmonary aspiration and foreign body in airway | 1 (1 to 2)       | 1 (1 to 2)       | 21% (7% to 36.2%)         |
| 39 | Georgia | Self-harm by firearm                            | 0 (0 to 0)       | 0 (0 to 1)       | 62.4% (40.4% to 93.1%)    |
| 40 | Georgia | Self-harm by other specified means              | 1 (1 to 2)       | 2 (1 to 2)       | 26.8% (19.1% to 35%)      |
| 41 | Georgia | Unintentional firearm injuries                  | 2 (1 to 2)       | 1 (1 to 2)       | -4.5% (-17% to 10.7%)     |
| 42 | Georgia | Venomous animal contact                         | 2 (1 to 4)       | 2 (1 to 3)       | -19.6% (-31.4% to -4.1%)  |
| 43 | Germany | Adverse effects of medical treatment            | 0 (0 to 0)       | 0 (0 to 0)       | 0% (0% to 0%)             |
| 44 | Germany | Conflict and terrorism                          | 0 (0 to 1)       | 0 (0 to 0)       | NA                        |
| 45 |         |                                                 |                  |                  |                           |
| 46 |         |                                                 |                  |                  |                           |

|    |         |                                                 |                  |                  |                           |
|----|---------|-------------------------------------------------|------------------|------------------|---------------------------|
| 1  |         |                                                 |                  |                  |                           |
| 2  | Germany | Cyclist road injuries                           | 28 (21 to 37)    | 18 (13 to 25)    | -34.9% (-44.8% to -24.6%) |
| 3  | Germany | Drowning                                        | 0 (0 to 0)       | 0 (0 to 0)       | 57.6% (40.5% to 76.1%)    |
| 4  | Germany | Environmental heat and cold exposure            | 2 (1 to 3)       | 2 (1 to 3)       | -1.4% (-6.3% to 3.3%)     |
| 5  | Germany | Executions and police conflict                  | 0 (0 to 0)       | 0 (0 to 0)       | NA                        |
| 6  | Germany | Exposure to forces of nature                    | 0 (0 to 0)       | 0 (0 to 0)       | NA                        |
| 7  | Germany | Falls                                           | 247 (195 to 315) | 272 (213 to 350) | 10.1% (5.2% to 15%)       |
| 8  | Germany | Fire, heat, and hot substances                  | 2 (1 to 4)       | 2 (1 to 4)       | -11.4% (-17.5% to -5.9%)  |
| 9  | Germany | Foreign body in eyes                            | 0 (0 to 0)       | 0 (0 to 0)       | 1.1% (0.3% to 2.3%)       |
| 10 | Germany | Foreign body in other body part                 | 2 (1 to 3)       | 2 (1 to 3)       | 0.8% (-3.4% to 5.6%)      |
| 11 | Germany | Motor vehicle road injuries                     | 42 (33 to 53)    | 19 (14 to 25)    | -54.6% (-62.2% to -46.3%) |
| 12 | Germany | Motorcyclist road injuries                      | 12 (9 to 16)     | 9 (7 to 12)      | -27.5% (-41% to -11.6%)   |
| 13 | Germany | Non-venomous animal contact                     | 2 (1 to 4)       | 2 (1 to 4)       | -10.6% (-14.9% to -5.7%)  |
| 14 | Germany | Other exposure to mechanical forces             | 44 (26 to 70)    | 43 (26 to 69)    | -1% (-7.2% to 4.1%)       |
| 15 | Germany | Other road injuries                             | 1 (1 to 2)       | 1 (1 to 2)       | -19.3% (-31.3% to -5.5%)  |
| 16 | Germany | Other transport injuries                        | 5 (4 to 7)       | 5 (3 to 6)       | -5.3% (-10.4% to 0%)      |
| 17 | Germany | Other unintentional injuries                    | 25 (16 to 40)    | 23 (14 to 37)    | -9% (-14.2% to -4.1%)     |
| 18 | Germany | Pedestrian road injuries                        | 10 (8 to 13)     | 6 (4 to 8)       | -42.8% (-52.2% to -32.2%) |
| 19 | Germany | Physical violence by firearm                    | 0 (0 to 1)       | 1 (0 to 1)       | 39.6% (25.5% to 56.8%)    |
| 20 | Germany | Physical violence by other means                | 15 (10 to 21)    | 13 (9 to 19)     | -12.3% (-18.6% to -6.5%)  |
| 21 | Germany | Physical violence by sharp object               | 2 (1 to 3)       | 1 (1 to 2)       | -17.8% (-26.8% to -8.8%)  |
| 22 | Germany | Poisoning by carbon monoxide                    | 0 (0 to 0)       | 0 (0 to 0)       | 9% (1.4% to 17.2%)        |
| 23 | Germany | Poisoning by other means                        | 0 (0 to 0)       | 0 (0 to 0)       | -1.9% (-7.2% to 4%)       |
| 24 | Germany | Pulmonary aspiration and foreign body in airway | 1 (1 to 2)       | 1 (1 to 2)       | -10.5% (-18.9% to -2.6%)  |
| 25 | Germany | Self-harm by firearm                            | 0 (0 to 1)       | 0 (0 to 1)       | -7% (-19.6% to 8.2%)      |
| 26 | Germany | Self-harm by other specified means              | 3 (2 to 5)       | 3 (2 to 4)       | -23.7% (-28.3% to -19.2%) |
| 27 | Germany | Unintentional firearm injuries                  | 1 (1 to 2)       | 1 (1 to 2)       | 2.6% (-5% to 10.7%)       |
| 28 | Germany | Venomous animal contact                         | 1 (0 to 2)       | 1 (0 to 2)       | -12.8% (-18.2% to -7%)    |
| 29 | Ghana   | Adverse effects of medical treatment            | 0 (0 to 0)       | 0 (0 to 0)       | 0% (0% to 0%)             |
| 30 | Ghana   | Conflict and terrorism                          | 0 (0 to 0)       | 0 (0 to 1)       | NA                        |
| 31 | Ghana   | Cyclist road injuries                           | 31 (19 to 46)    | 39 (25 to 58)    | 28% (19.2% to 38.9%)      |
| 32 | Ghana   | Drowning                                        | 0 (0 to 0)       | 0 (0 to 0)       | 4.5% (-2.5% to 12.1%)     |
| 33 | Ghana   | Environmental heat and cold exposure            | 0 (0 to 1)       | 0 (0 to 1)       | 2.8% (-2% to 8.6%)        |
| 34 | Ghana   | Executions and police conflict                  | 0 (0 to 0)       | 0 (0 to 0)       | NA                        |
| 35 | Ghana   | Exposure to forces of nature                    | 0 (0 to 0)       | 0 (0 to 0)       | NA                        |
| 36 | Ghana   | Falls                                           | 19 (12 to 28)    | 23 (15 to 35)    | 23.4% (19.4% to 27.5%)    |
| 37 | Ghana   | Fire, heat, and hot substances                  | 0 (0 to 0)       | 0 (0 to 0)       | -2.7% (-7% to 2.4%)       |
| 38 | Ghana   | Foreign body in eyes                            | 0 (0 to 0)       | 0 (0 to 0)       | -1.1% (-2.4% to -0.1%)    |
| 39 | Ghana   | Foreign body in other body part                 | 3 (1 to 7)       | 4 (1 to 8)       | 2.2% (-3.2% to 7.5%)      |
| 40 | Ghana   | Motor vehicle road injuries                     | 52 (36 to 73)    | 64 (43 to 91)    | 22.1% (13.6% to 32.1%)    |
| 41 | Ghana   | Motorcyclist road injuries                      | 17 (12 to 24)    | 25 (17 to 35)    | 45.2% (35.2% to 56.6%)    |
| 42 | Ghana   | Non-venomous animal contact                     | 3 (1 to 6)       | 3 (1 to 5)       | -10% (-14.7% to -5.2%)    |
| 43 | Ghana   | Other exposure to mechanical forces             | 22 (11 to 41)    | 23 (11 to 42)    | 1.3% (-4.7% to 7.7%)      |
| 44 | Ghana   | Other road injuries                             | 3 (1 to 5)       | 3 (2 to 6)       | 22.4% (12.5% to 33.6%)    |
| 45 |         |                                                 |                  |                  |                           |
| 46 |         |                                                 |                  |                  |                           |

|    |           |                                                 |                  |                  |                           |
|----|-----------|-------------------------------------------------|------------------|------------------|---------------------------|
| 1  |           |                                                 |                  |                  |                           |
| 2  | Ghana     | Other transport injuries                        | 3 (2 to 4)       | 3 (2 to 4)       | 1.1% (-4.9% to 6.7%)      |
| 3  | Ghana     | Other unintentional injuries                    | 3 (1 to 5)       | 3 (1 to 5)       | -0.4% (-7.6% to 6.4%)     |
| 4  | Ghana     | Pedestrian road injuries                        | 70 (51 to 91)    | 83 (61 to 109)   | 18.3% (11.2% to 26.6%)    |
| 5  | Ghana     | Physical violence by firearm                    | 0 (0 to 0)       | 0 (0 to 0)       | 43.9% (22.7% to 64.3%)    |
| 6  | Ghana     | Physical violence by other means                | 5 (3 to 8)       | 5 (3 to 8)       | -4.8% (-11.1% to 1.5%)    |
| 7  | Ghana     | Physical violence by sharp object               | 2 (1 to 3)       | 1 (1 to 3)       | -6.2% (-13.7% to 1.9%)    |
| 8  | Ghana     | Poisoning by carbon monoxide                    | 0 (0 to 0)       | 0 (0 to 0)       | 16.9% (5.6% to 29.6%)     |
| 9  | Ghana     | Poisoning by other means                        | 0 (0 to 0)       | 0 (0 to 0)       | -7.9% (-14.9% to -0.6%)   |
| 10 | Ghana     | Pulmonary aspiration and foreign body in airway | 0 (0 to 0)       | 0 (0 to 0)       | -6% (-14.3% to 2.5%)      |
| 11 | Ghana     | Self-harm by firearm                            | 0 (0 to 0)       | 0 (0 to 0)       | 34.8% (25.2% to 45.2%)    |
| 12 | Ghana     | Self-harm by other specified means              | 0 (0 to 0)       | 0 (0 to 0)       | 27.3% (19.5% to 35.6%)    |
| 13 | Ghana     | Unintentional firearm injuries                  | 1 (0 to 2)       | 1 (0 to 2)       | -9.1% (-17.2% to 0.4%)    |
| 14 | Ghana     | Venomous animal contact                         | 0 (0 to 1)       | 0 (0 to 1)       | -14.7% (-22.2% to -8.2%)  |
| 15 | Greece    | Adverse effects of medical treatment            | 0 (0 to 0)       | 0 (0 to 0)       | 0% (0% to 0%)             |
| 16 | Greece    | Conflict and terrorism                          | 0 (0 to 0)       | 0 (0 to 0)       | NA                        |
| 17 | Greece    | Cyclist road injuries                           | 22 (16 to 31)    | 20 (14 to 27)    | -12.8% (-23.5% to -0.4%)  |
| 18 | Greece    | Drowning                                        | 0 (0 to 0)       | 0 (0 to 0)       | 52.8% (40.7% to 66.7%)    |
| 19 | Greece    | Environmental heat and cold exposure            | 2 (2 to 3)       | 2 (1 to 3)       | -2.9% (-7.4% to 1.6%)     |
| 20 | Greece    | Executions and police conflict                  | 0 (0 to 0)       | 0 (0 to 0)       | NA                        |
| 21 | Greece    | Exposure to forces of nature                    | 0 (0 to 0)       | 0 (0 to 0)       | NA                        |
| 22 | Greece    | Falls                                           | 217 (166 to 284) | 201 (152 to 270) | -7% (-12.5% to -1.4%)     |
| 23 | Greece    | Fire, heat, and hot substances                  | 2 (1 to 4)       | 2 (1 to 3)       | -13.9% (-19.7% to -9.1%)  |
| 24 | Greece    | Foreign body in eyes                            | 0 (0 to 0)       | 0 (0 to 0)       | 0% (0% to 0.2%)           |
| 25 | Greece    | Foreign body in other body part                 | 2 (1 to 3)       | 2 (1 to 3)       | 0.6% (-4.1% to 5.3%)      |
| 26 | Greece    | Motor vehicle road injuries                     | 60 (48 to 75)    | 32 (25 to 41)    | -46.5% (-53.7% to -39.2%) |
| 27 | Greece    | Motorcyclist road injuries                      | 14 (11 to 19)    | 16 (13 to 21)    | 13.5% (-5.7% to 35%)      |
| 28 | Greece    | Non-venomous animal contact                     | 2 (1 to 4)       | 2 (1 to 4)       | -8.8% (-13% to -4.1%)     |
| 29 | Greece    | Other exposure to mechanical forces             | 44 (27 to 71)    | 45 (28 to 72)    | 2.7% (-1.7% to 7.8%)      |
| 30 | Greece    | Other road injuries                             | 1 (1 to 2)       | 1 (1 to 2)       | -11.7% (-23.2% to 0.8%)   |
| 31 | Greece    | Other transport injuries                        | 4 (3 to 6)       | 5 (4 to 7)       | 14.4% (8.3% to 21.4%)     |
| 32 | Greece    | Other unintentional injuries                    | 28 (18 to 44)    | 21 (13 to 33)    | -25.5% (-32.8% to -19.4%) |
| 33 | Greece    | Pedestrian road injuries                        | 13 (10 to 17)    | 8 (6 to 10)      | -40.7% (-48.3% to -32.4%) |
| 34 | Greece    | Physical violence by firearm                    | 1 (0 to 1)       | 1 (0 to 1)       | 12.6% (1.6% to 25.2%)     |
| 35 | Greece    | Physical violence by other means                | 15 (10 to 22)    | 14 (10 to 20)    | -4.4% (-10.1% to 2.3%)    |
| 36 | Greece    | Physical violence by sharp object               | 2 (1 to 3)       | 1 (1 to 2)       | -11% (-18.9% to -2.5%)    |
| 37 | Greece    | Poisoning by carbon monoxide                    | 0 (0 to 0)       | 0 (0 to 0)       | 3.8% (-4.1% to 11.5%)     |
| 38 | Greece    | Poisoning by other means                        | 0 (0 to 0)       | 0 (0 to 0)       | -7.4% (-13.3% to -2.4%)   |
| 39 | Greece    | Pulmonary aspiration and foreign body in airway | 1 (1 to 2)       | 1 (0 to 1)       | -40% (-47.2% to -30.8%)   |
| 40 | Greece    | Self-harm by firearm                            | 0 (0 to 0)       | 0 (0 to 0)       | 11.1% (-0.2% to 23.6%)    |
| 41 | Greece    | Self-harm by other specified means              | 1 (1 to 2)       | 1 (1 to 2)       | 6.2% (1.4% to 11.6%)      |
| 42 | Greece    | Unintentional firearm injuries                  | 1 (1 to 2)       | 1 (1 to 2)       | -14.1% (-21% to -6.5%)    |
| 43 | Greece    | Venomous animal contact                         | 1 (0 to 2)       | 1 (0 to 2)       | -7.7% (-13% to -2.3%)     |
| 44 | Greenland | Adverse effects of medical treatment            | 0 (0 to 0)       | 0 (0 to 0)       | 0% (0% to 0%)             |
| 45 |           |                                                 |                  |                  |                           |
| 46 |           |                                                 |                  |                  |                           |

|    |           |                                                 |                  |                 |                           |
|----|-----------|-------------------------------------------------|------------------|-----------------|---------------------------|
| 1  |           |                                                 |                  |                 |                           |
| 2  | Greenland | Conflict and terrorism                          | 0 (0 to 0)       | 0 (0 to 0)      | NA                        |
| 3  | Greenland | Cyclist road injuries                           | 8 (5 to 13)      | 7 (4 to 10)     | -19.1% (-28.7% to -8.1%)  |
| 4  | Greenland | Drowning                                        | 0 (0 to 0)       | 0 (0 to 0)      | -8.1% (-16.6% to 0.5%)    |
| 5  | Greenland | Environmental heat and cold exposure            | 2 (1 to 3)       | 1 (1 to 2)      | -35.8% (-40.2% to -31.2%) |
| 6  | Greenland | Executions and police conflict                  | 0 (0 to 0)       | 0 (0 to 0)      | NA                        |
| 7  | Greenland | Exposure to forces of nature                    | 0 (0 to 0)       | 0 (0 to 0)      | NA                        |
| 8  | Greenland | Falls                                           | 163 (108 to 241) | 136 (91 to 196) | -16.7% (-19.8% to -13.1%) |
| 9  | Greenland | Fire, heat, and hot substances                  | 1 (1 to 2)       | 1 (0 to 1)      | -43.6% (-47.3% to -39.7%) |
| 10 | Greenland | Foreign body in eyes                            | 0 (0 to 0)       | 0 (0 to 0)      | -0.7% (-1.4% to 0%)       |
| 11 | Greenland | Foreign body in other body part                 | 2 (1 to 3)       | 2 (1 to 3)      | 0.1% (-3.6% to 3.9%)      |
| 12 | Greenland | Motor vehicle road injuries                     | 33 (24 to 45)    | 25 (18 to 35)   | -24.6% (-31% to -17.9%)   |
| 13 | Greenland | Motorcyclist road injuries                      | 10 (7 to 15)     | 9 (6 to 13)     | -11.7% (-19.8% to -3%)    |
| 14 | Greenland | Non-venomous animal contact                     | 5 (2 to 9)       | 3 (1 to 5)      | -40.9% (-49.8% to -33.9%) |
| 15 | Greenland | Other exposure to mechanical forces             | 135 (69 to 249)  | 81 (41 to 147)  | -40.1% (-44.5% to -35.4%) |
| 16 | Greenland | Other road injuries                             | 1 (1 to 3)       | 1 (1 to 2)      | -26.4% (-36.4% to -16.1%) |
| 17 | Greenland | Other transport injuries                        | 26 (19 to 35)    | 15 (11 to 20)   | -44% (-47.3% to -40.2%)   |
| 18 | Greenland | Other unintentional injuries                    | 13 (8 to 23)     | 9 (6 to 16)     | -28.9% (-33.9% to -23.6%) |
| 19 | Greenland | Pedestrian road injuries                        | 10 (7 to 14)     | 6 (4 to 8)      | -40.5% (-46.7% to -33.2%) |
| 20 | Greenland | Physical violence by firearm                    | 1 (0 to 1)       | 1 (0 to 1)      | 4.4% (-8.2% to 18.9%)     |
| 21 | Greenland | Physical violence by other means                | 39 (25 to 59)    | 27 (18 to 41)   | -28.8% (-33.3% to -23.9%) |
| 22 | Greenland | Physical violence by sharp object               | 7 (3 to 12)      | 4 (2 to 8)      | -33.8% (-40.8% to -25.1%) |
| 23 | Greenland | Poisoning by carbon monoxide                    | 0 (0 to 0)       | 0 (0 to 0)      | -39.1% (-48.6% to -28.6%) |
| 24 | Greenland | Poisoning by other means                        | 0 (0 to 0)       | 0 (0 to 0)      | -34.7% (-40.7% to -28.6%) |
| 25 | Greenland | Pulmonary aspiration and foreign body in airway | 0 (0 to 0)       | 0 (0 to 0)      | -27.3% (-33% to -21.8%)   |
| 26 | Greenland | Self-harm by firearm                            | 1 (0 to 1)       | 0 (0 to 1)      | -31.6% (-38.9% to -23.9%) |
| 27 | Greenland | Self-harm by other specified means              | 2 (1 to 4)       | 2 (1 to 3)      | -24.4% (-28.6% to -19.5%) |
| 28 | Greenland | Unintentional firearm injuries                  | 4 (2 to 7)       | 1 (1 to 3)      | -62.1% (-67.8% to -55.7%) |
| 29 | Greenland | Venomous animal contact                         | 1 (0 to 2)       | 1 (0 to 1)      | -0.7% (-8.7% to 11.4%)    |
| 30 | Grenada   | Adverse effects of medical treatment            | 0 (0 to 0)       | 0 (0 to 0)      | 0% (0% to 0%)             |
| 31 | Grenada   | Conflict and terrorism                          | 0 (0 to 0)       | 0 (0 to 0)      | NA                        |
| 32 | Grenada   | Cyclist road injuries                           | 30 (21 to 39)    | 25 (18 to 34)   | -14.6% (-22.5% to -5.5%)  |
| 33 | Grenada   | Drowning                                        | 0 (0 to 1)       | 0 (0 to 1)      | 15.2% (3.8% to 27.8%)     |
| 34 | Grenada   | Environmental heat and cold exposure            | 12 (8 to 17)     | 13 (9 to 18)    | 8% (3.8% to 12.6%)        |
| 35 | Grenada   | Executions and police conflict                  | 0 (0 to 0)       | 0 (0 to 0)      | NA                        |
| 36 | Grenada   | Exposure to forces of nature                    | 0 (0 to 0)       | 0 (0 to 0)      | NA                        |
| 37 | Grenada   | Falls                                           | 50 (39 to 64)    | 83 (65 to 106)  | 66.4% (60.5% to 73.4%)    |
| 38 | Grenada   | Fire, heat, and hot substances                  | 5 (3 to 8)       | 4 (3 to 7)      | -10.5% (-16.7% to -3.9%)  |
| 39 | Grenada   | Foreign body in eyes                            | 0 (0 to 0)       | 0 (0 to 0)      | 1.6% (0.7% to 2.9%)       |
| 40 | Grenada   | Foreign body in other body part                 | 1 (1 to 2)       | 1 (1 to 3)      | 0.3% (-5.4% to 6.6%)      |
| 41 | Grenada   | Motor vehicle road injuries                     | 28 (21 to 36)    | 23 (17 to 30)   | -16.5% (-24.8% to -7%)    |
| 42 | Grenada   | Motorcyclist road injuries                      | 14 (11 to 19)    | 17 (13 to 22)   | 18.2% (5.4% to 34.8%)     |
| 43 | Grenada   | Non-venomous animal contact                     | 3 (2 to 6)       | 4 (2 to 7)      | 12.3% (2.9% to 24.9%)     |
| 44 | Grenada   | Other exposure to mechanical forces             | 47 (29 to 75)    | 62 (38 to 99)   | 31.3% (21.6% to 41.6%)    |
| 45 |           |                                                 |                  |                 |                           |
| 46 |           |                                                 |                  |                 |                           |

|    |         |                                                 |               |               |                           |
|----|---------|-------------------------------------------------|---------------|---------------|---------------------------|
| 1  |         |                                                 |               |               |                           |
| 2  | Grenada | Other road injuries                             | 4 (2 to 6)    | 3 (2 to 6)    | -8.8% (-18.1% to 2.3%)    |
| 3  | Grenada | Other transport injuries                        | 5 (4 to 7)    | 6 (4 to 7)    | 13% (6% to 21.7%)         |
| 4  | Grenada | Other unintentional injuries                    | 16 (10 to 26) | 16 (10 to 25) | -1.8% (-7.2% to 4%)       |
| 5  | Grenada | Pedestrian road injuries                        | 13 (10 to 18) | 10 (7 to 13)  | -25% (-31.9% to -16.7%)   |
| 6  | Grenada | Physical violence by firearm                    | 0 (0 to 1)    | 1 (0 to 1)    | 51.3% (34.8% to 72.5%)    |
| 7  | Grenada | Physical violence by other means                | 9 (6 to 13)   | 14 (10 to 20) | 55.3% (40.9% to 72%)      |
| 8  | Grenada | Physical violence by sharp object               | 2 (1 to 3)    | 2 (1 to 3)    | -0.3% (-9.9% to 11.9%)    |
| 9  | Grenada | Poisoning by carbon monoxide                    | 0 (0 to 0)    | 0 (0 to 0)    | 27.3% (7.3% to 48.9%)     |
| 10 | Grenada | Poisoning by other means                        | 0 (0 to 0)    | 0 (0 to 0)    | -35.8% (-47.3% to -24.1%) |
| 11 | Grenada | Pulmonary aspiration and foreign body in airway | 1 (0 to 1)    | 0 (0 to 1)    | -23.9% (-30.7% to -16.8%) |
| 12 | Grenada | Self-harm by firearm                            | 0 (0 to 0)    | 0 (0 to 0)    | 8.8% (-2.2% to 20.6%)     |
| 13 | Grenada | Self-harm by other specified means              | 0 (0 to 1)    | 0 (0 to 1)    | -12.5% (-19.3% to -5.2%)  |
| 14 | Grenada | Unintentional firearm injuries                  | 5 (3 to 8)    | 5 (3 to 8)    | 1.1% (-11.7% to 13.9%)    |
| 15 | Grenada | Venomous animal contact                         | 5 (2 to 10)   | 5 (2 to 9)    | -9.3% (-15.6% to -3.1%)   |
| 16 | Guam    | Adverse effects of medical treatment            | 0 (0 to 0)    | 0 (0 to 0)    | 0% (0% to 0%)             |
| 17 | Guam    | Conflict and terrorism                          | 0 (0 to 0)    | 0 (0 to 0)    | NA                        |
| 18 | Guam    | Cyclist road injuries                           | 8 (5 to 12)   | 7 (4 to 11)   | -4.8% (-12.6% to 4.5%)    |
| 19 | Guam    | Drowning                                        | 0 (0 to 0)    | 0 (0 to 0)    | -0.4% (-7.6% to 7.8%)     |
| 20 | Guam    | Environmental heat and cold exposure            | 0 (0 to 1)    | 0 (0 to 1)    | 1.2% (-4.8% to 8.1%)      |
| 21 | Guam    | Executions and police conflict                  | 0 (0 to 0)    | 0 (0 to 0)    | NA                        |
| 22 | Guam    | Exposure to forces of nature                    | 0 (0 to 0)    | 0 (0 to 0)    | NA                        |
| 23 | Guam    | Falls                                           | 29 (18 to 44) | 38 (23 to 59) | 31.8% (26.6% to 36.6%)    |
| 24 | Guam    | Fire, heat, and hot substances                  | 0 (0 to 0)    | 0 (0 to 1)    | 11.7% (5.7% to 18.2%)     |
| 25 | Guam    | Foreign body in eyes                            | 0 (0 to 0)    | 0 (0 to 0)    | -1.1% (-2% to -0.5%)      |
| 26 | Guam    | Foreign body in other body part                 | 1 (0 to 2)    | 1 (0 to 2)    | -2.9% (-8.5% to 2.8%)     |
| 27 | Guam    | Motor vehicle road injuries                     | 42 (30 to 58) | 28 (19 to 39) | -34.3% (-40.6% to -28.6%) |
| 28 | Guam    | Motorcyclist road injuries                      | 25 (18 to 34) | 26 (19 to 35) | 2.9% (-6.4% to 13.4%)     |
| 29 | Guam    | Non-venomous animal contact                     | 2 (1 to 4)    | 2 (1 to 3)    | -7.2% (-11% to -2.6%)     |
| 30 | Guam    | Other exposure to mechanical forces             | 25 (12 to 46) | 19 (9 to 36)  | -23.4% (-29.9% to -17.1%) |
| 31 | Guam    | Other road injuries                             | 2 (1 to 4)    | 2 (1 to 4)    | -4.2% (-14% to 6.9%)      |
| 32 | Guam    | Other transport injuries                        | 4 (2 to 5)    | 3 (2 to 5)    | -10% (-16.2% to -5.1%)    |
| 33 | Guam    | Other unintentional injuries                    | 2 (1 to 4)    | 2 (1 to 3)    | -3.8% (-9.7% to 2%)       |
| 34 | Guam    | Pedestrian road injuries                        | 19 (13 to 26) | 15 (10 to 21) | -21.1% (-28% to -13.4%)   |
| 35 | Guam    | Physical violence by firearm                    | 0 (0 to 1)    | 0 (0 to 0)    | -50.6% (-59.6% to -41.3%) |
| 36 | Guam    | Physical violence by other means                | 33 (22 to 50) | 29 (19 to 43) | -13.6% (-19.2% to -7.8%)  |
| 37 | Guam    | Physical violence by sharp object               | 3 (2 to 7)    | 2 (1 to 4)    | -48.6% (-56% to -41.6%)   |
| 38 | Guam    | Poisoning by carbon monoxide                    | 0 (0 to 0)    | 0 (0 to 0)    | 8.1% (-1.4% to 18%)       |
| 39 | Guam    | Poisoning by other means                        | 0 (0 to 0)    | 0 (0 to 0)    | -4.3% (-11.3% to 2.1%)    |
| 40 | Guam    | Pulmonary aspiration and foreign body in airway | 0 (0 to 0)    | 0 (0 to 0)    | -2.4% (-11.8% to 9.5%)    |
| 41 | Guam    | Self-harm by firearm                            | 0 (0 to 0)    | 0 (0 to 0)    | 9.7% (-1.2% to 21.7%)     |
| 42 | Guam    | Self-harm by other specified means              | 0 (0 to 1)    | 0 (0 to 1)    | 23.5% (12.3% to 37.5%)    |
| 43 | Guam    | Unintentional firearm injuries                  | 1 (1 to 3)    | 1 (0 to 2)    | -27.4% (-36.5% to -19%)   |
| 44 | Guam    | Venomous animal contact                         | 1 (0 to 2)    | 1 (0 to 1)    | -10.1% (-16.8% to -3.7%)  |
| 45 |         |                                                 |               |               |                           |
| 46 |         |                                                 |               |               |                           |

|    |           |                                                 |                 |                 |                           |
|----|-----------|-------------------------------------------------|-----------------|-----------------|---------------------------|
| 1  |           |                                                 |                 |                 |                           |
| 2  | Guatemala | Adverse effects of medical treatment            | 0 (0 to 0)      | 0 (0 to 0)      | 0% (0% to 0%)             |
| 3  | Guatemala | Conflict and terrorism                          | 59 (18 to 152)  | 0 (0 to 0)      | NA                        |
| 4  | Guatemala | Cyclist road injuries                           | 14 (10 to 20)   | 13 (9 to 18)    | -9.2% (-16.6% to -0.4%)   |
| 5  | Guatemala | Drowning                                        | 0 (0 to 0)      | 0 (0 to 0)      | -8% (-18.7% to 3.9%)      |
| 6  | Guatemala | Environmental heat and cold exposure            | 3 (2 to 4)      | 4 (3 to 5)      | 37.1% (26.3% to 48.4%)    |
| 7  | Guatemala | Executions and police conflict                  | 0 (0 to 0)      | 0 (0 to 0)      | NA                        |
| 8  | Guatemala | Exposure to forces of nature                    | 0 (0 to 0)      | 0 (0 to 0)      | NA                        |
| 9  | Guatemala | Falls                                           | 110 (87 to 142) | 120 (93 to 153) | 8.6% (4.4% to 13.4%)      |
| 10 | Guatemala | Fire, heat, and hot substances                  | 5 (3 to 8)      | 3 (2 to 6)      | -33.1% (-39.7% to -26.4%) |
| 11 | Guatemala | Foreign body in eyes                            | 0 (0 to 0)      | 0 (0 to 0)      | -1.6% (-3.1% to -0.6%)    |
| 12 | Guatemala | Foreign body in other body part                 | 4 (2 to 7)      | 2 (1 to 4)      | -46.3% (-52.8% to -38.5%) |
| 13 | Guatemala | Motor vehicle road injuries                     | 19 (14 to 24)   | 24 (18 to 30)   | 27.6% (15.8% to 41.2%)    |
| 14 | Guatemala | Motorcyclist road injuries                      | 7 (6 to 10)     | 10 (8 to 13)    | 38.1% (26% to 53%)        |
| 15 | Guatemala | Non-venomous animal contact                     | 6 (3 to 11)     | 5 (3 to 9)      | -20% (-24.4% to -15.5%)   |
| 16 | Guatemala | Other exposure to mechanical forces             | 42 (25 to 69)   | 64 (38 to 104)  | 52.4% (36.8% to 74.4%)    |
| 17 | Guatemala | Other road injuries                             | 4 (2 to 6)      | 4 (2 to 6)      | 0.9% (-10.7% to 14.4%)    |
| 18 | Guatemala | Other transport injuries                        | 3 (2 to 5)      | 4 (3 to 5)      | 22% (9.2% to 39.3%)       |
| 19 | Guatemala | Other unintentional injuries                    | 19 (12 to 30)   | 15 (10 to 24)   | -19.6% (-24.9% to -13.6%) |
| 20 | Guatemala | Pedestrian road injuries                        | 20 (15 to 25)   | 16 (12 to 19)   | -20.5% (-28.1% to -11.5%) |
| 21 | Guatemala | Physical violence by firearm                    | 1 (1 to 2)      | 6 (4 to 8)      | 334% (256.7% to 434.3%)   |
| 22 | Guatemala | Physical violence by other means                | 46 (34 to 64)   | 25 (17 to 37)   | -45.3% (-52.5% to -36.8%) |
| 23 | Guatemala | Physical violence by sharp object               | 7 (4 to 10)     | 8 (5 to 12)     | 17.2% (-1.5% to 39.4%)    |
| 24 | Guatemala | Poisoning by carbon monoxide                    | 0 (0 to 0)      | 0 (0 to 0)      | 41.4% (22% to 67%)        |
| 25 | Guatemala | Poisoning by other means                        | 0 (0 to 0)      | 0 (0 to 0)      | -2.4% (-9.7% to 4.9%)     |
| 26 | Guatemala | Pulmonary aspiration and foreign body in airway | 1 (1 to 2)      | 0 (0 to 1)      | -55.1% (-60.1% to -49.2%) |
| 27 | Guatemala | Self-harm by firearm                            | 0 (0 to 0)      | 0 (0 to 0)      | -29.5% (-42.8% to -17.2%) |
| 28 | Guatemala | Self-harm by other specified means              | 0 (0 to 1)      | 0 (0 to 1)      | 30.6% (18.6% to 44.2%)    |
| 29 | Guatemala | Unintentional firearm injuries                  | 5 (3 to 7)      | 10 (6 to 15)    | 98.2% (71.8% to 131.6%)   |
| 30 | Guatemala | Venomous animal contact                         | 8 (3 to 14)     | 6 (3 to 12)     | -14.4% (-18.2% to -9.9%)  |
| 31 | Guinea    | Adverse effects of medical treatment            | 0 (0 to 0)      | 0 (0 to 0)      | 0% (0% to 0%)             |
| 32 | Guinea    | Conflict and terrorism                          | 0 (0 to 0)      | 0 (0 to 1)      | NA                        |
| 33 | Guinea    | Cyclist road injuries                           | 24 (15 to 36)   | 29 (18 to 43)   | 22.7% (14% to 32.1%)      |
| 34 | Guinea    | Drowning                                        | 0 (0 to 0)      | 0 (0 to 0)      | -8.8% (-15.3% to -3.2%)   |
| 35 | Guinea    | Environmental heat and cold exposure            | 0 (0 to 1)      | 0 (0 to 1)      | 6% (0.7% to 13.4%)        |
| 36 | Guinea    | Executions and police conflict                  | 0 (0 to 0)      | 0 (0 to 0)      | NA                        |
| 37 | Guinea    | Exposure to forces of nature                    | 0 (0 to 0)      | 0 (0 to 0)      | NA                        |
| 38 | Guinea    | Falls                                           | 16 (11 to 25)   | 19 (12 to 28)   | 15% (10.8% to 18.8%)      |
| 39 | Guinea    | Fire, heat, and hot substances                  | 0 (0 to 0)      | 0 (0 to 0)      | -1% (-6.2% to 4.3%)       |
| 40 | Guinea    | Foreign body in eyes                            | 0 (0 to 0)      | 0 (0 to 0)      | -0.1% (-0.4% to 0.1%)     |
| 41 | Guinea    | Foreign body in other body part                 | 4 (2 to 8)      | 4 (2 to 8)      | -5.1% (-9.7% to 0.8%)     |
| 42 | Guinea    | Motor vehicle road injuries                     | 47 (32 to 65)   | 56 (39 to 77)   | 19.8% (10.5% to 30%)      |
| 43 | Guinea    | Motorcyclist road injuries                      | 22 (15 to 30)   | 28 (20 to 38)   | 26.7% (16.8% to 37.6%)    |
| 44 | Guinea    | Non-venomous animal contact                     | 3 (1 to 6)      | 3 (1 to 6)      | 0.9% (-3.9% to 6.2%)      |
| 45 |           |                                                 |                 |                 |                           |
| 46 |           |                                                 |                 |                 |                           |



|    |               |                                                 |               |               |                           |
|----|---------------|-------------------------------------------------|---------------|---------------|---------------------------|
| 1  |               |                                                 |               |               |                           |
| 2  | Guinea        | Other exposure to mechanical forces             | 27 (13 to 50) | 24 (12 to 44) | -11.2% (-16.5% to -6.5%)  |
| 3  | Guinea        | Other road injuries                             | 2 (1 to 4)    | 2 (1 to 4)    | 14.2% (4.9% to 24.1%)     |
| 4  | Guinea        | Other transport injuries                        | 3 (2 to 4)    | 3 (2 to 4)    | -3.8% (-9% to 2%)         |
| 5  | Guinea        | Other unintentional injuries                    | 3 (2 to 5)    | 3 (2 to 5)    | -14% (-18.7% to -9.2%)    |
| 6  | Guinea        | Pedestrian road injuries                        | 52 (39 to 68) | 60 (43 to 80) | 14.4% (6.6% to 21.7%)     |
| 7  | Guinea        | Physical violence by firearm                    | 0 (0 to 0)    | 0 (0 to 0)    | 29% (17.6% to 41.9%)      |
| 8  | Guinea        | Physical violence by other means                | 7 (5 to 11)   | 9 (6 to 13)   | 19.6% (12.3% to 27.2%)    |
| 9  | Guinea        | Physical violence by sharp object               | 2 (1 to 3)    | 2 (1 to 4)    | 15.1% (6.7% to 25.1%)     |
| 10 | Guinea        | Poisoning by carbon monoxide                    | 0 (0 to 0)    | 0 (0 to 0)    | 5.5% (-4.9% to 17.2%)     |
| 11 | Guinea        | Poisoning by other means                        | 0 (0 to 0)    | 0 (0 to 0)    | -12% (-19.3% to -4.9%)    |
| 12 | Guinea        | Pulmonary aspiration and foreign body in airway | 0 (0 to 0)    | 0 (0 to 0)    | -8.2% (-17.7% to 3.2%)    |
| 13 | Guinea        | Self-harm by firearm                            | 0 (0 to 0)    | 0 (0 to 0)    | 42% (32.1% to 54.2%)      |
| 14 | Guinea        | Self-harm by other specified means              | 0 (0 to 0)    | 0 (0 to 0)    | 29.1% (22.3% to 36.1%)    |
| 15 | Guinea        | Unintentional firearm injuries                  | 1 (0 to 2)    | 1 (0 to 2)    | -14.5% (-21.3% to -7.4%)  |
| 16 | Guinea-Bissau | Venomous animal contact                         | 0 (0 to 1)    | 0 (0 to 1)    | 2.5% (-4.4% to 10.6%)     |
| 17 | Guinea-Bissau | Adverse effects of medical treatment            | 0 (0 to 0)    | 0 (0 to 0)    | 0% (0% to 0%)             |
| 18 | Guinea-Bissau | Conflict and terrorism                          | 0 (0 to 0)    | 0 (0 to 0)    | NA                        |
| 19 | Guinea-Bissau | Cyclist road injuries                           | 31 (20 to 46) | 33 (21 to 49) | 6.1% (-1.7% to 14.6%)     |
| 20 | Guinea-Bissau | Drowning                                        | 0 (0 to 0)    | 0 (0 to 0)    | -23.7% (-28.7% to -18.1%) |
| 21 | Guinea-Bissau | Environmental heat and cold exposure            | 0 (0 to 1)    | 0 (0 to 1)    | 0.5% (-5.5% to 6.6%)      |
| 22 | Guinea-Bissau | Executions and police conflict                  | 0 (0 to 0)    | 0 (0 to 0)    | NA                        |
| 23 | Guinea-Bissau | Exposure to forces of nature                    | 0 (0 to 0)    | 0 (0 to 0)    | NA                        |
| 24 | Guinea-Bissau | Falls                                           | 18 (12 to 27) | 20 (13 to 29) | 6.9% (2.6% to 11%)        |
| 25 | Guinea-Bissau | Fire, heat, and hot substances                  | 0 (0 to 0)    | 0 (0 to 0)    | -11.9% (-17.3% to -6.1%)  |
| 26 | Guinea-Bissau | Foreign body in eyes                            | 0 (0 to 0)    | 0 (0 to 0)    | -0.4% (-1.1% to 0.1%)     |
| 27 | Guinea-Bissau | Foreign body in other body part                 | 4 (2 to 8)    | 3 (1 to 7)    | -4.5% (-9.2% to 0.8%)     |
| 28 | Guinea-Bissau | Motor vehicle road injuries                     | 62 (42 to 90) | 64 (43 to 92) | 3% (-4.9% to 10.9%)       |
| 29 | Guinea-Bissau | Motorcyclist road injuries                      | 34 (24 to 47) | 32 (23 to 44) | -4.8% (-11.4% to 3%)      |
| 30 | Guinea-Bissau | Non-venomous animal contact                     | 3 (1 to 6)    | 3 (1 to 6)    | -6.3% (-10.6% to -1.8%)   |
| 31 | Guinea-Bissau | Other exposure to mechanical forces             | 26 (13 to 47) | 22 (11 to 41) | -12.7% (-18.3% to -6.6%)  |
| 32 | Guinea-Bissau | Other road injuries                             | 2 (1 to 4)    | 2 (1 to 4)    | 2.8% (-6% to 13%)         |
| 33 | Guinea-Bissau | Other transport injuries                        | 4 (3 to 5)    | 3 (2 to 5)    | -15.1% (-20.4% to -9.4%)  |
| 34 | Guinea-Bissau | Other unintentional injuries                    | 3 (2 to 5)    | 3 (2 to 5)    | -17.3% (-22.2% to -12.3%) |
| 35 | Guinea-Bissau | Pedestrian road injuries                        | 72 (52 to 98) | 71 (50 to 95) | -2% (-8.2% to 4.6%)       |
| 36 | Guinea-Bissau | Physical violence by firearm                    | 0 (0 to 0)    | 0 (0 to 0)    | 14.7% (5.4% to 25.4%)     |
| 37 | Guinea-Bissau | Physical violence by other means                | 9 (6 to 13)   | 10 (6 to 15)  | 10.6% (4.5% to 17.5%)     |
| 38 | Guinea-Bissau | Physical violence by sharp object               | 2 (1 to 4)    | 2 (1 to 4)    | 8.5% (0.6% to 17.6%)      |
| 39 | Guinea-Bissau | Poisoning by carbon monoxide                    | 0 (0 to 0)    | 0 (0 to 0)    | 5% (-6.5% to 17.3%)       |
| 40 | Guinea-Bissau | Poisoning by other means                        | 0 (0 to 0)    | 0 (0 to 0)    | -22.5% (-29.2% to -15%)   |
| 41 | Guinea-Bissau | Pulmonary aspiration and foreign body in airway | 0 (0 to 0)    | 0 (0 to 0)    | -20.3% (-29.4% to -10.2%) |
| 42 | Guinea-Bissau | Self-harm by firearm                            | 0 (0 to 0)    | 0 (0 to 0)    | 14.7% (7.3% to 23.3%)     |
| 43 | Guinea-Bissau | Self-harm by other specified means              | 0 (0 to 0)    | 0 (0 to 0)    | 6.2% (0.6% to 12.1%)      |
| 44 | Guinea-Bissau | Unintentional firearm injuries                  | 1 (0 to 2)    | 1 (0 to 2)    | -20% (-27.2% to -12.3%)   |
| 45 |               |                                                 |               |               |                           |
| 46 |               |                                                 |               |               |                           |

|    |               |                                                 |                |                 |                           |
|----|---------------|-------------------------------------------------|----------------|-----------------|---------------------------|
| 1  |               |                                                 |                |                 |                           |
| 2  | Guinea-Bissau | Venomous animal contact                         | 0 (0 to 1)     | 0 (0 to 1)      | -7.1% (-13.9% to 0.5%)    |
| 3  | Guyana        | Adverse effects of medical treatment            | 0 (0 to 0)     | 0 (0 to 0)      | 0% (0% to 0%)             |
| 4  | Guyana        | Conflict and terrorism                          | 0 (0 to 0)     | 0 (0 to 0)      | NA                        |
| 5  | Guyana        | Cyclist road injuries                           | 28 (20 to 37)  | 29 (21 to 39)   | 3.6% (-5.7% to 14.7%)     |
| 6  | Guyana        | Drowning                                        | 0 (0 to 1)     | 0 (0 to 1)      | 16.3% (5.9% to 27.1%)     |
| 7  | Guyana        | Environmental heat and cold exposure            | 15 (11 to 21)  | 15 (11 to 21)   | -1.9% (-6.3% to 2.4%)     |
| 8  | Guyana        | Executions and police conflict                  | 0 (0 to 0)     | 0 (0 to 0)      | NA                        |
| 9  | Guyana        | Exposure to forces of nature                    | 0 (0 to 0)     | 0 (0 to 0)      | NA                        |
| 10 | Guyana        | Falls                                           | 86 (69 to 108) | 106 (85 to 133) | 23.5% (18.9% to 28.3%)    |
| 11 | Guyana        | Fire, heat, and hot substances                  | 4 (3 to 7)     | 4 (2 to 6)      | -12.3% (-17.9% to -5.7%)  |
| 12 | Guyana        | Foreign body in eyes                            | 0 (0 to 0)     | 0 (0 to 0)      | -0.2% (-0.5% to 0.1%)     |
| 13 | Guyana        | Foreign body in other body part                 | 2 (1 to 5)     | 2 (1 to 3)      | -27.3% (-32.6% to -20.8%) |
| 14 | Guyana        | Motor vehicle road injuries                     | 22 (16 to 28)  | 27 (20 to 36)   | 25% (13.4% to 39.8%)      |
| 15 | Guyana        | Motorcyclist road injuries                      | 14 (10 to 18)  | 22 (17 to 29)   | 65.8% (47.7% to 87.9%)    |
| 16 | Guyana        | Non-venomous animal contact                     | 3 (2 to 6)     | 4 (2 to 6)      | 4% (-6% to 15.6%)         |
| 17 | Guyana        | Other exposure to mechanical forces             | 30 (18 to 48)  | 38 (22 to 62)   | 25.9% (19.3% to 33.2%)    |
| 18 | Guyana        | Other road injuries                             | 3 (2 to 5)     | 3 (2 to 5)      | 11.5% (0.6% to 23.8%)     |
| 19 | Guyana        | Other transport injuries                        | 7 (5 to 9)     | 8 (6 to 10)     | 11.4% (4.1% to 19.2%)     |
| 20 | Guyana        | Other unintentional injuries                    | 24 (16 to 38)  | 19 (12 to 29)   | -21.5% (-26.7% to -16.1%) |
| 21 | Guyana        | Pedestrian road injuries                        | 17 (13 to 21)  | 13 (10 to 17)   | -21% (-28.6% to -12.6%)   |
| 22 | Guyana        | Physical violence by firearm                    | 1 (0 to 1)     | 2 (1 to 2)      | 210.6% (169% to 263.8%)   |
| 23 | Guyana        | Physical violence by other means                | 15 (11 to 20)  | 17 (12 to 25)   | 18.5% (7.8% to 29.7%)     |
| 24 | Guyana        | Physical violence by sharp object               | 3 (2 to 5)     | 6 (3 to 9)      | 93.8% (68.7% to 128.5%)   |
| 25 | Guyana        | Poisoning by carbon monoxide                    | 0 (0 to 0)     | 0 (0 to 0)      | 26% (9.4% to 45.6%)       |
| 26 | Guyana        | Poisoning by other means                        | 0 (0 to 0)     | 0 (0 to 0)      | -11.2% (-21.8% to -1.1%)  |
| 27 | Guyana        | Pulmonary aspiration and foreign body in airway | 1 (0 to 1)     | 0 (0 to 1)      | -28.1% (-36.3% to -18.5%) |
| 28 | Guyana        | Self-harm by firearm                            | 0 (0 to 1)     | 1 (0 to 1)      | 33.7% (13.2% to 60.4%)    |
| 29 | Guyana        | Self-harm by other specified means              | 2 (1 to 3)     | 2 (1 to 3)      | 17.7% (9.1% to 26.5%)     |
| 30 | Guyana        | Unintentional firearm injuries                  | 3 (2 to 4)     | 3 (2 to 5)      | 19.7% (8.8% to 30.3%)     |
| 31 | Haiti         | Venomous animal contact                         | 8 (4 to 13)    | 12 (7 to 20)    | 55.8% (40.7% to 76.6%)    |
| 32 | Haiti         | Adverse effects of medical treatment            | 0 (0 to 0)     | 0 (0 to 0)      | 0% (0% to 0%)             |
| 33 | Haiti         | Conflict and terrorism                          | 1 (1 to 3)     | 0 (0 to 0)      | NA                        |
| 34 | Haiti         | Cyclist road injuries                           | 23 (16 to 31)  | 22 (15 to 30)   | -3.7% (-10% to 3.6%)      |
| 35 | Haiti         | Drowning                                        | 1 (0 to 1)     | 0 (0 to 1)      | -27.2% (-34.7% to -17.2%) |
| 36 | Haiti         | Environmental heat and cold exposure            | 18 (13 to 24)  | 16 (12 to 22)   | -9.8% (-13.3% to -5.9%)   |
| 37 | Haiti         | Executions and police conflict                  | 0 (0 to 0)     | 0 (0 to 0)      | NA                        |
| 38 | Haiti         | Exposure to forces of nature                    | 0 (0 to 0)     | 0 (0 to 0)      | NA                        |
| 39 | Haiti         | Falls                                           | 36 (28 to 46)  | 47 (37 to 60)   | 31.6% (26.2% to 36.7%)    |
| 40 | Haiti         | Fire, heat, and hot substances                  | 5 (3 to 8)     | 4 (2 to 6)      | -26.3% (-30.7% to -21.8%) |
| 41 | Haiti         | Foreign body in eyes                            | 0 (0 to 0)     | 0 (0 to 0)      | 0% (-0.5% to 0.4%)        |
| 42 | Haiti         | Foreign body in other body part                 | 1 (1 to 3)     | 1 (1 to 3)      | 2.5% (-3.3% to 10.5%)     |
| 43 | Haiti         | Motor vehicle road injuries                     | 17 (12 to 23)  | 17 (12 to 23)   | -1.4% (-8.5% to 6.5%)     |
| 44 | Haiti         | Motorcyclist road injuries                      | 16 (12 to 21)  | 18 (14 to 25)   | 17.7% (10.2% to 27.5%)    |
| 45 |               |                                                 |                |                 |                           |
| 46 |               |                                                 |                |                 |                           |

|    |          |                                                 |               |               |                           |
|----|----------|-------------------------------------------------|---------------|---------------|---------------------------|
| 1  |          |                                                 |               |               |                           |
| 2  | Haiti    | Non-venomous animal contact                     | 3 (2 to 6)    | 3 (2 to 6)    | 4.7% (-0.5% to 10.4%)     |
| 3  | Haiti    | Other exposure to mechanical forces             | 45 (26 to 77) | 45 (26 to 74) | -1.3% (-7.7% to 5.8%)     |
| 4  | Haiti    | Other road injuries                             | 2 (1 to 3)    | 2 (1 to 3)    | 7.3% (-1.3% to 17.3%)     |
| 5  | Haiti    | Other transport injuries                        | 6 (4 to 7)    | 5 (4 to 7)    | -6.1% (-10.6% to -1.1%)   |
| 6  | Haiti    | Other unintentional injuries                    | 16 (10 to 26) | 12 (8 to 20)  | -22% (-25.7% to -17.4%)   |
| 7  | Haiti    | Pedestrian road injuries                        | 13 (10 to 17) | 11 (8 to 14)  | -19.8% (-24.8% to -14.1%) |
| 8  | Haiti    | Physical violence by firearm                    | 1 (1 to 1)    | 1 (1 to 2)    | 26.7% (13.9% to 41.7%)    |
| 9  | Haiti    | Physical violence by other means                | 20 (14 to 28) | 19 (14 to 28) | -1.3% (-6.9% to 5.3%)     |
| 10 | Haiti    | Physical violence by sharp object               | 5 (3 to 8)    | 6 (4 to 9)    | 13.5% (4% to 25.2%)       |
| 11 | Haiti    | Poisoning by carbon monoxide                    | 0 (0 to 0)    | 0 (0 to 0)    | 15.4% (0.9% to 30.9%)     |
| 12 | Haiti    | Poisoning by other means                        | 0 (0 to 0)    | 0 (0 to 0)    | -21.7% (-28.3% to -15.1%) |
| 13 | Haiti    | Pulmonary aspiration and foreign body in airway | 1 (0 to 1)    | 0 (0 to 1)    | -35.6% (-43.4% to -27.6%) |
| 14 | Haiti    | Self-harm by firearm                            | 0 (0 to 0)    | 0 (0 to 0)    | -1.5% (-12.1% to 9.5%)    |
| 15 | Haiti    | Self-harm by other specified means              | 1 (0 to 1)    | 1 (0 to 1)    | -3.7% (-9.4% to 3.1%)     |
| 16 | Haiti    | Unintentional firearm injuries                  | 14 (9 to 20)  | 10 (6 to 15)  | -25.7% (-31.9% to -18.7%) |
| 17 | Haiti    | Venomous animal contact                         | 6 (3 to 11)   | 7 (3 to 12)   | 5% (0.5% to 9.8%)         |
| 18 | Honduras | Adverse effects of medical treatment            | 0 (0 to 0)    | 0 (0 to 0)    | 0% (0% to 0%)             |
| 19 | Honduras | Conflict and terrorism                          | 1 (0 to 1)    | 0 (0 to 0)    | NA                        |
| 20 | Honduras | Cyclist road injuries                           | 20 (13 to 28) | 16 (11 to 23) | -18% (-25.6% to -9.8%)    |
| 21 | Honduras | Drowning                                        | 0 (0 to 0)    | 0 (0 to 0)    | 9% (-3.5% to 24.9%)       |
| 22 | Honduras | Environmental heat and cold exposure            | 3 (2 to 4)    | 3 (2 to 4)    | 0.2% (-4.2% to 5%)        |
| 23 | Honduras | Executions and police conflict                  | 0 (0 to 0)    | 0 (0 to 0)    | NA                        |
| 24 | Honduras | Exposure to forces of nature                    | 0 (0 to 0)    | 0 (0 to 0)    | NA                        |
| 25 | Honduras | Falls                                           | 64 (49 to 85) | 71 (54 to 96) | 11.4% (6.1% to 17.3%)     |
| 26 | Honduras | Fire, heat, and hot substances                  | 3 (2 to 5)    | 3 (2 to 5)    | 1.3% (-6.4% to 9.2%)      |
| 27 | Honduras | Foreign body in eyes                            | 0 (0 to 0)    | 0 (0 to 0)    | -0.8% (-1.5% to -0.3%)    |
| 28 | Honduras | Foreign body in other body part                 | 1 (1 to 2)    | 1 (1 to 2)    | 1% (-4% to 6.6%)          |
| 29 | Honduras | Motor vehicle road injuries                     | 30 (23 to 39) | 31 (24 to 40) | 2.1% (-6.2% to 11.8%)     |
| 30 | Honduras | Motorcyclist road injuries                      | 9 (7 to 12)   | 10 (8 to 14)  | 13.9% (2.6% to 26.2%)     |
| 31 | Honduras | Non-venomous animal contact                     | 6 (4 to 11)   | 6 (3 to 11)   | -7.7% (-13.5% to -1.8%)   |
| 32 | Honduras | Other exposure to mechanical forces             | 48 (29 to 79) | 44 (26 to 70) | -9.9% (-17.1% to -0.4%)   |
| 33 | Honduras | Other road injuries                             | 5 (3 to 8)    | 4 (2 to 7)    | -17.2% (-25% to -8.1%)    |
| 34 | Honduras | Other transport injuries                        | 4 (3 to 5)    | 4 (3 to 5)    | -4% (-10% to 2.2%)        |
| 35 | Honduras | Other unintentional injuries                    | 19 (12 to 30) | 14 (9 to 22)  | -27.4% (-33.5% to -20.7%) |
| 36 | Honduras | Pedestrian road injuries                        | 27 (21 to 33) | 20 (16 to 26) | -24.2% (-31.3% to -16.3%) |
| 37 | Honduras | Physical violence by firearm                    | 2 (2 to 3)    | 6 (4 to 9)    | 170.6% (133.6% to 218.7%) |
| 38 | Honduras | Physical violence by other means                | 38 (27 to 54) | 57 (40 to 82) | 50.9% (37.3% to 66.6%)    |
| 39 | Honduras | Physical violence by sharp object               | 11 (7 to 16)  | 18 (12 to 27) | 66.5% (47.6% to 89.5%)    |
| 40 | Honduras | Poisoning by carbon monoxide                    | 0 (0 to 0)    | 0 (0 to 0)    | 43.7% (23.7% to 65.2%)    |
| 41 | Honduras | Poisoning by other means                        | 0 (0 to 0)    | 0 (0 to 0)    | -18% (-27.4% to -8.2%)    |
| 42 | Honduras | Pulmonary aspiration and foreign body in airway | 0 (0 to 1)    | 0 (0 to 1)    | -10.4% (-22.4% to 2.4%)   |
| 43 | Honduras | Self-harm by firearm                            | 0 (0 to 0)    | 0 (0 to 0)    | -17.5% (-28.7% to -5.6%)  |
| 44 | Honduras | Self-harm by other specified means              | 0 (0 to 0)    | 0 (0 to 0)    | -11% (-20.2% to -1.1%)    |
| 45 |          |                                                 |               |               |                           |
| 46 |          |                                                 |               |               |                           |

|    |          |                                                 |                  |                  |                           |
|----|----------|-------------------------------------------------|------------------|------------------|---------------------------|
| 1  |          |                                                 |                  |                  |                           |
| 2  | Honduras | Unintentional firearm injuries                  | 5 (3 to 8)       | 3 (2 to 5)       | -34.2% (-41.2% to -26.8%) |
| 3  | Honduras | Venomous animal contact                         | 8 (4 to 15)      | 7 (4 to 14)      | -11.3% (-16.5% to -6.5%)  |
| 4  | Hungary  | Adverse effects of medical treatment            | 0 (0 to 0)       | 0 (0 to 0)       | 0% (0% to 0%)             |
| 5  | Hungary  | Conflict and terrorism                          | 0 (0 to 0)       | 0 (0 to 0)       | NA                        |
| 6  | Hungary  | Cyclist road injuries                           | 90 (68 to 116)   | 57 (42 to 77)    | -36.1% (-43.8% to -27.9%) |
| 7  | Hungary  | Drowning                                        | 0 (0 to 0)       | 0 (0 to 1)       | 58.2% (36% to 83.4%)      |
| 8  | Hungary  | Environmental heat and cold exposure            | 3 (2 to 4)       | 2 (2 to 3)       | -17.3% (-21.6% to -13%)   |
| 9  | Hungary  | Executions and police conflict                  | 0 (0 to 0)       | 0 (0 to 0)       | NA                        |
| 10 | Hungary  | Exposure to forces of nature                    | 0 (0 to 0)       | 0 (0 to 0)       | NA                        |
| 11 | Hungary  | Falls                                           | 448 (364 to 561) | 329 (255 to 421) | -26.6% (-32.2% to -20.2%) |
| 12 | Hungary  | Fire, heat, and hot substances                  | 4 (3 to 7)       | 4 (2 to 6)       | -19.2% (-26.6% to -12.9%) |
| 13 | Hungary  | Foreign body in eyes                            | 0 (0 to 0)       | 0 (0 to 0)       | 0.4% (0.2% to 0.8%)       |
| 14 | Hungary  | Foreign body in other body part                 | 2 (1 to 5)       | 2 (1 to 5)       | 0.5% (-4.9% to 6.3%)      |
| 15 | Hungary  | Motor vehicle road injuries                     | 126 (98 to 159)  | 80 (62 to 101)   | -36.6% (-43.8% to -27.8%) |
| 16 | Hungary  | Motorcyclist road injuries                      | 20 (15 to 26)    | 14 (10 to 19)    | -29.3% (-42.6% to -14.5%) |
| 17 | Hungary  | Non-venomous animal contact                     | 6 (3 to 11)      | 5 (3 to 9)       | -16.1% (-20.5% to -11.8%) |
| 18 | Hungary  | Other exposure to mechanical forces             | 136 (84 to 213)  | 130 (80 to 204)  | -4.4% (-10.7% to 0.7%)    |
| 19 | Hungary  | Other road injuries                             | 1 (1 to 2)       | 1 (1 to 2)       | -9.3% (-20.3% to 1.9%)    |
| 20 | Hungary  | Other transport injuries                        | 7 (5 to 9)       | 6 (4 to 8)       | -16.2% (-23.9% to -10%)   |
| 21 | Hungary  | Other unintentional injuries                    | 32 (20 to 53)    | 28 (17 to 47)    | -11.9% (-19% to -4.4%)    |
| 22 | Hungary  | Pedestrian road injuries                        | 41 (32 to 52)    | 25 (19 to 33)    | -38.6% (-47.2% to -29.1%) |
| 23 | Hungary  | Physical violence by firearm                    | 0 (0 to 0)       | 0 (0 to 1)       | 72.1% (52.4% to 93.1%)    |
| 24 | Hungary  | Physical violence by other means                | 30 (21 to 42)    | 24 (16 to 33)    | -21.2% (-28.7% to -12.9%) |
| 25 | Hungary  | Physical violence by sharp object               | 3 (2 to 5)       | 2 (1 to 3)       | -40.2% (-50.4% to -29.6%) |
| 26 | Hungary  | Poisoning by carbon monoxide                    | 0 (0 to 0)       | 0 (0 to 0)       | 30.9% (19% to 45.1%)      |
| 27 | Hungary  | Poisoning by other means                        | 0 (0 to 1)       | 0 (0 to 1)       | -4% (-11.6% to 3.7%)      |
| 28 | Hungary  | Pulmonary aspiration and foreign body in airway | 1 (1 to 2)       | 1 (1 to 2)       | -18.9% (-25.4% to -11.4%) |
| 29 | Hungary  | Self-harm by firearm                            | 1 (0 to 1)       | 1 (0 to 1)       | -14.8% (-26.8% to 1.3%)   |
| 30 | Hungary  | Self-harm by other specified means              | 6 (4 to 9)       | 3 (2 to 5)       | -43.6% (-47% to -40%)     |
| 31 | Hungary  | Unintentional firearm injuries                  | 1 (1 to 2)       | 1 (1 to 2)       | -0.5% (-9.6% to 9.1%)     |
| 32 | Hungary  | Venomous animal contact                         | 5 (2 to 9)       | 4 (2 to 8)       | -15.4% (-20.1% to -10.1%) |
| 33 | Iceland  | Adverse effects of medical treatment            | 0 (0 to 0)       | 0 (0 to 0)       | 0% (0% to 0%)             |
| 34 | Iceland  | Conflict and terrorism                          | 0 (0 to 0)       | 0 (0 to 0)       | NA                        |
| 35 | Iceland  | Cyclist road injuries                           | 21 (15 to 29)    | 16 (11 to 21)    | -25.8% (-34.6% to -16.1%) |
| 36 | Iceland  | Drowning                                        | 0 (0 to 0)       | 0 (0 to 0)       | 22.5% (11.1% to 35%)      |
| 37 | Iceland  | Environmental heat and cold exposure            | 2 (1 to 3)       | 2 (1 to 3)       | -4.3% (-9.2% to 0.2%)     |
| 38 | Iceland  | Executions and police conflict                  | 0 (0 to 0)       | 0 (0 to 0)       | NA                        |
| 39 | Iceland  | Exposure to forces of nature                    | 0 (0 to 0)       | 0 (0 to 0)       | NA                        |
| 40 | Iceland  | Falls                                           | 230 (179 to 296) | 258 (199 to 334) | 12.4% (8.6% to 17%)       |
| 41 | Iceland  | Fire, heat, and hot substances                  | 2 (1 to 4)       | 2 (1 to 4)       | -11.2% (-16.4% to -6.7%)  |
| 42 | Iceland  | Foreign body in eyes                            | 0 (0 to 0)       | 0 (0 to 0)       | 0.4% (0.2% to 0.8%)       |
| 43 | Iceland  | Foreign body in other body part                 | 2 (1 to 3)       | 2 (1 to 3)       | 1.3% (-3.1% to 6.3%)      |
| 44 | Iceland  | Motor vehicle road injuries                     | 42 (32 to 53)    | 19 (14 to 25)    | -54.3% (-59.9% to -48.4%) |
| 45 |          |                                                 |                  |                  |                           |
| 46 |          |                                                 |                  |                  |                           |

|    |         |                                                 |                  |                  |                           |
|----|---------|-------------------------------------------------|------------------|------------------|---------------------------|
| 1  |         |                                                 |                  |                  |                           |
| 2  | Iceland | Motorcyclist road injuries                      | 6 (5 to 8)       | 6 (4 to 8)       | -9% (-21.8% to 3.9%)      |
| 3  | Iceland | Non-venomous animal contact                     | 2 (1 to 4)       | 2 (1 to 4)       | -9.6% (-13.5% to -5.7%)   |
| 4  | Iceland | Other exposure to mechanical forces             | 51 (32 to 81)    | 45 (27 to 72)    | -12.8% (-19.8% to -6.6%)  |
| 5  | Iceland | Other road injuries                             | 1 (1 to 2)       | 1 (1 to 2)       | -19.4% (-29% to -7.4%)    |
| 6  | Iceland | Other transport injuries                        | 11 (8 to 14)     | 8 (6 to 10)      | -25.4% (-31% to -19.1%)   |
| 7  | Iceland | Other unintentional injuries                    | 24 (15 to 39)    | 21 (13 to 35)    | -11.3% (-16.9% to -6.1%)  |
| 8  | Iceland | Pedestrian road injuries                        | 9 (6 to 11)      | 6 (4 to 8)       | -34.9% (-44% to -24.2%)   |
| 9  | Iceland | Physical violence by firearm                    | 1 (0 to 1)       | 1 (0 to 1)       | 29.6% (18% to 43.2%)      |
| 10 | Iceland | Physical violence by other means                | 16 (11 to 22)    | 14 (10 to 21)    | -9% (-14.9% to -2.4%)     |
| 11 | Iceland | Physical violence by sharp object               | 1 (1 to 2)       | 1 (1 to 2)       | -7.9% (-16.4% to 1.3%)    |
| 12 | Iceland | Poisoning by carbon monoxide                    | 0 (0 to 0)       | 0 (0 to 0)       | -0.2% (-6.8% to 7.7%)     |
| 13 | Iceland | Poisoning by other means                        | 0 (0 to 0)       | 0 (0 to 0)       | -10% (-15.3% to -4.9%)    |
| 14 | Iceland | Pulmonary aspiration and foreign body in airway | 1 (1 to 2)       | 1 (1 to 2)       | -10.6% (-19.6% to 0.1%)   |
| 15 | Iceland | Self-harm by firearm                            | 1 (0 to 1)       | 0 (0 to 1)       | -35.7% (-44.3% to -25.7%) |
| 16 | Iceland | Self-harm by other specified means              | 4 (2 to 5)       | 3 (2 to 4)       | -26.6% (-30.9% to -22.1%) |
| 17 | Iceland | Unintentional firearm injuries                  | 1 (0 to 2)       | 1 (1 to 2)       | 5.8% (-2.8% to 16%)       |
| 18 | India   | Venomous animal contact                         | 1 (0 to 2)       | 1 (0 to 2)       | -10.1% (-15.2% to -4.4%)  |
| 19 | India   | Adverse effects of medical treatment            | 0 (0 to 0)       | 0 (0 to 0)       | 0% (0% to 0%)             |
| 20 | India   | Conflict and terrorism                          | 9 (4 to 20)      | 0 (0 to 1)       | NA                        |
| 21 | India   | Cyclist road injuries                           | 79 (57 to 107)   | 90 (65 to 123)   | 14.1% (10.4% to 18%)      |
| 22 | India   | Drowning                                        | 0 (0 to 1)       | 0 (0 to 1)       | -31.2% (-34.7% to -27.1%) |
| 23 | India   | Environmental heat and cold exposure            | 4 (3 to 5)       | 4 (3 to 5)       | -5% (-8.1% to -1.7%)      |
| 24 | India   | Executions and police conflict                  | 0 (0 to 0)       | 0 (0 to 0)       | NA                        |
| 25 | India   | Exposure to forces of nature                    | 1 (1 to 2)       | 0 (0 to 0)       | NA                        |
| 26 | India   | Falls                                           | 160 (126 to 204) | 179 (140 to 226) | 11.7% (8.3% to 15.2%)     |
| 27 | India   | Fire, heat, and hot substances                  | 1 (0 to 2)       | 1 (0 to 1)       | -11.3% (-14.5% to -8.3%)  |
| 28 | India   | Foreign body in eyes                            | 0 (0 to 0)       | 0 (0 to 0)       | -0.9% (-1.6% to -0.4%)    |
| 29 | India   | Foreign body in other body part                 | 1 (1 to 3)       | 1 (1 to 3)       | -1.7% (-3.7% to 0.4%)     |
| 30 | India   | Motor vehicle road injuries                     | 45 (32 to 60)    | 57 (40 to 76)    | 27% (22.7% to 31.1%)      |
| 31 | India   | Motorcyclist road injuries                      | 53 (40 to 70)    | 83 (63 to 110)   | 57.6% (51.6% to 62.9%)    |
| 32 | India   | Non-venomous animal contact                     | 14 (8 to 24)     | 10 (6 to 17)     | -30.1% (-33.2% to -26.7%) |
| 33 | India   | Other exposure to mechanical forces             | 11 (6 to 18)     | 10 (6 to 17)     | -3.9% (-8.5% to 0.9%)     |
| 34 | India   | Other road injuries                             | 2 (1 to 3)       | 2 (1 to 4)       | 14.9% (10.7% to 18.8%)    |
| 35 | India   | Other transport injuries                        | 7 (5 to 9)       | 7 (5 to 9)       | 3.4% (-0.2% to 6.6%)      |
| 36 | India   | Other unintentional injuries                    | 14 (9 to 23)     | 12 (8 to 18)     | -18.9% (-21.9% to -15.7%) |
| 37 | India   | Pedestrian road injuries                        | 53 (39 to 68)    | 61 (45 to 80)    | 15.6% (10.9% to 19.7%)    |
| 38 | India   | Physical violence by firearm                    | 0 (0 to 0)       | 0 (0 to 0)       | -7.4% (-14% to -0.2%)     |
| 39 | India   | Physical violence by other means                | 29 (21 to 41)    | 26 (18 to 36)    | -11.5% (-13.2% to -9.8%)  |
| 40 | India   | Physical violence by sharp object               | 1 (1 to 2)       | 1 (1 to 2)       | -15.3% (-19.8% to -10.3%) |
| 41 | India   | Poisoning by carbon monoxide                    | 0 (0 to 0)       | 0 (0 to 0)       | 8.3% (-1.7% to 17.2%)     |
| 42 | India   | Poisoning by other means                        | 0 (0 to 0)       | 0 (0 to 0)       | 2.2% (-6.6% to 9.5%)      |
| 43 | India   | Pulmonary aspiration and foreign body in airway | 1 (0 to 1)       | 0 (0 to 1)       | -18.6% (-22.1% to -15.1%) |
| 44 | India   | Self-harm by firearm                            | 1 (0 to 1)       | 0 (0 to 1)       | -1.9% (-7.3% to 2.7%)     |
| 45 |         |                                                 |                  |                  |                           |
| 46 |         |                                                 |                  |                  |                           |

|    |                            |                                                 |                  |                |                           |
|----|----------------------------|-------------------------------------------------|------------------|----------------|---------------------------|
| 1  |                            |                                                 |                  |                |                           |
| 2  | India                      | Self-harm by other specified means              | 3 (2 to 6)       | 3 (1 to 4)     | -25.7% (-29.2% to -22.1%) |
| 3  | India                      | Unintentional firearm injuries                  | 1 (0 to 1)       | 1 (0 to 1)     | -5% (-9.8% to -0.2%)      |
| 4  | India                      | Venomous animal contact                         | 9 (4 to 18)      | 5 (2 to 10)    | -48.4% (-53.5% to -44.3%) |
| 5  | Indonesia                  | Adverse effects of medical treatment            | 0 (0 to 0)       | 0 (0 to 0)     | 0% (0% to 0%)             |
| 6  | Indonesia                  | Conflict and terrorism                          | 1 (0 to 1)       | 0 (0 to 0)     | NA                        |
| 7  | Indonesia                  | Cyclist road injuries                           | 13 (7 to 20)     | 11 (7 to 18)   | -11.2% (-17.1% to -5.6%)  |
| 8  | Indonesia                  | Drowning                                        | 0 (0 to 0)       | 0 (0 to 0)     | -8.9% (-14.9% to -2.9%)   |
| 9  | Indonesia                  | Environmental heat and cold exposure            | 1 (0 to 1)       | 0 (0 to 1)     | -12.6% (-17% to -8.3%)    |
| 10 | Indonesia                  | Executions and police conflict                  | 0 (0 to 0)       | 0 (0 to 0)     | NA                        |
| 11 | Indonesia                  | Exposure to forces of nature                    | 1 (0 to 1)       | 0 (0 to 1)     | NA                        |
| 12 | Indonesia                  | Falls                                           | 38 (24 to 57)    | 36 (23 to 54)  | -5.4% (-7.6% to -3.2%)    |
| 13 | Indonesia                  | Fire, heat, and hot substances                  | 0 (0 to 0)       | 0 (0 to 0)     | 2.8% (-1.8% to 7.1%)      |
| 14 | Indonesia                  | Foreign body in eyes                            | 0 (0 to 0)       | 0 (0 to 0)     | 0.5% (0.2% to 0.9%)       |
| 15 | Indonesia                  | Foreign body in other body part                 | 2 (1 to 4)       | 2 (1 to 3)     | -8.7% (-10.7% to -6.5%)   |
| 16 | Indonesia                  | Motor vehicle road injuries                     | 29 (18 to 42)    | 20 (12 to 30)  | -31% (-35.6% to -27%)     |
| 17 | Indonesia                  | Motorcyclist road injuries                      | 52 (38 to 69)    | 52 (38 to 69)  | 0.5% (-4.5% to 6.2%)      |
| 18 | Indonesia                  | Non-venomous animal contact                     | 3 (1 to 6)       | 2 (1 to 4)     | -37.4% (-43.2% to -32.7%) |
| 19 | Indonesia                  | Other exposure to mechanical forces             | 32 (15 to 60)    | 28 (13 to 54)  | -12.5% (-18.9% to -6.5%)  |
| 20 | Indonesia                  | Other road injuries                             | 2 (1 to 4)       | 2 (1 to 4)     | -18.5% (-28% to -9.4%)    |
| 21 | Indonesia                  | Other transport injuries                        | 5 (3 to 7)       | 3 (2 to 4)     | -44.4% (-50.5% to -38.4%) |
| 22 | Indonesia                  | Other unintentional injuries                    | 6 (3 to 11)      | 5 (3 to 10)    | -9.5% (-19.5% to -2%)     |
| 23 | Indonesia                  | Pedestrian road injuries                        | 24 (17 to 34)    | 14 (10 to 20)  | -41.3% (-44.6% to -38.4%) |
| 24 | Indonesia                  | Physical violence by firearm                    | 0 (0 to 0)       | 0 (0 to 0)     | 38.9% (27.6% to 50.5%)    |
| 25 | Indonesia                  | Physical violence by other means                | 10 (6 to 16)     | 11 (7 to 16)   | 4.9% (-0.9% to 10.8%)     |
| 26 | Indonesia                  | Physical violence by sharp object               | 2 (1 to 3)       | 2 (1 to 3)     | -4.4% (-11.4% to 1.9%)    |
| 27 | Indonesia                  | Poisoning by carbon monoxide                    | 0 (0 to 0)       | 0 (0 to 0)     | 1% (-2.6% to 5.6%)        |
| 28 | Indonesia                  | Poisoning by other means                        | 0 (0 to 0)       | 0 (0 to 0)     | -12.7% (-15% to -10.1%)   |
| 29 | Indonesia                  | Pulmonary aspiration and foreign body in airway | 0 (0 to 0)       | 0 (0 to 0)     | -35.8% (-41.8% to -28.8%) |
| 30 | Indonesia                  | Self-harm by firearm                            | 0 (0 to 0)       | 0 (0 to 0)     | -21.1% (-26.4% to -16.3%) |
| 31 | Indonesia                  | Self-harm by other specified means              | 0 (0 to 0)       | 0 (0 to 0)     | -14.4% (-17.7% to -10.6%) |
| 32 | Indonesia                  | Unintentional firearm injuries                  | 2 (1 to 4)       | 1 (1 to 3)     | -15.1% (-22.1% to -8.7%)  |
| 33 | Indonesia                  | Venomous animal contact                         | 0 (0 to 1)       | 0 (0 to 1)     | 6.9% (-5.8% to 25.8%)     |
| 34 | Iran (Islamic Republic of) | Adverse effects of medical treatment            | 0 (0 to 0)       | 0 (0 to 0)     | 0% (0% to 0%)             |
| 35 | Iran (Islamic Republic of) | Conflict and terrorism                          | 16 (6 to 39)     | 0 (0 to 1)     | NA                        |
| 36 | Iran (Islamic Republic of) | Cyclist road injuries                           | 19 (13 to 28)    | 16 (11 to 23)  | -16.5% (-21.7% to -11.6%) |
| 37 | Iran (Islamic Republic of) | Drowning                                        | 1 (0 to 1)       | 0 (0 to 0)     | -57.3% (-62% to -52.4%)   |
| 38 | Iran (Islamic Republic of) | Environmental heat and cold exposure            | 3 (2 to 5)       | 3 (2 to 5)     | 6.9% (5.3% to 8.7%)       |
| 39 | Iran (Islamic Republic of) | Executions and police conflict                  | 4 (2 to 8)       | 0 (0 to 0)     | NA                        |
| 40 | Iran (Islamic Republic of) | Exposure to forces of nature                    | 494 (301 to 754) | 1 (1 to 2)     | NA                        |
| 41 | Iran (Islamic Republic of) | Falls                                           | 98 (74 to 131)   | 94 (73 to 124) | -3.3% (-6.3% to 0.2%)     |
| 42 | Iran (Islamic Republic of) | Fire, heat, and hot substances                  | 1 (1 to 2)       | 1 (0 to 1)     | -34.4% (-37.7% to -31.2%) |
| 43 | Iran (Islamic Republic of) | Foreign body in eyes                            | 0 (0 to 0)       | 0 (0 to 0)     | -0.1% (-0.7% to 0.3%)     |
| 44 | Iran (Islamic Republic of) | Foreign body in other body part                 | 2 (1 to 3)       | 2 (1 to 3)     | 0.5% (-0.8% to 1.6%)      |
| 45 |                            |                                                 |                  |                |                           |
| 46 |                            |                                                 |                  |                |                           |

|    |                            |                                                 |                |                |                           |
|----|----------------------------|-------------------------------------------------|----------------|----------------|---------------------------|
| 1  |                            |                                                 |                |                |                           |
| 2  | Iran (Islamic Republic of) | Motor vehicle road injuries                     | 52 (39 to 68)  | 33 (25 to 44)  | -35.7% (-38.2% to -33%)   |
| 3  | Iran (Islamic Republic of) | Motorcyclist road injuries                      | 23 (17 to 31)  | 15 (11 to 20)  | -37.4% (-40.3% to -34.5%) |
| 4  | Iran (Islamic Republic of) | Non-venomous animal contact                     | 4 (2 to 7)     | 4 (2 to 6)     | -6.8% (-9.7% to -3.6%)    |
| 5  | Iran (Islamic Republic of) | Other exposure to mechanical forces             | 32 (20 to 51)  | 27 (17 to 44)  | -15% (-17.2% to -13.2%)   |
| 6  | Iran (Islamic Republic of) | Other road injuries                             | 2 (1 to 3)     | 2 (1 to 3)     | 3% (-2.5% to 8.8%)        |
| 7  | Iran (Islamic Republic of) | Other transport injuries                        | 7 (5 to 9)     | 7 (5 to 9)     | 3.1% (1% to 5.4%)         |
| 8  | Iran (Islamic Republic of) | Other unintentional injuries                    | 17 (11 to 28)  | 15 (9 to 24)   | -15.6% (-19.1% to -11.8%) |
| 9  | Iran (Islamic Republic of) | Pedestrian road injuries                        | 34 (25 to 44)  | 25 (18 to 32)  | -27.9% (-31% to -25.2%)   |
| 10 | Iran (Islamic Republic of) | Physical violence by firearm                    | 0 (0 to 1)     | 1 (0 to 1)     | 55.1% (45% to 65.8%)      |
| 11 | Iran (Islamic Republic of) | Physical violence by other means                | 14 (10 to 20)  | 15 (10 to 22)  | 6.5% (3.4% to 9.4%)       |
| 12 | Iran (Islamic Republic of) | Physical violence by sharp object               | 1 (1 to 2)     | 2 (1 to 2)     | 19% (11.4% to 26.7%)      |
| 13 | Iran (Islamic Republic of) | Poisoning by carbon monoxide                    | 0 (0 to 0)     | 0 (0 to 0)     | -36.8% (-45.2% to -28.6%) |
| 14 | Iran (Islamic Republic of) | Poisoning by other means                        | 0 (0 to 0)     | 0 (0 to 0)     | -36.1% (-42.1% to -30.3%) |
| 15 | Iran (Islamic Republic of) | Pulmonary aspiration and foreign body in airway | 0 (0 to 1)     | 0 (0 to 1)     | -25.2% (-31.3% to -19.1%) |
| 16 | Iran (Islamic Republic of) | Self-harm by firearm                            | 0 (0 to 0)     | 0 (0 to 0)     | 9.5% (3.8% to 15.6%)      |
| 17 | Iran (Islamic Republic of) | Self-harm by other specified means              | 2 (1 to 3)     | 1 (1 to 2)     | -17.2% (-20.2% to -13.9%) |
| 18 | Iran (Islamic Republic of) | Unintentional firearm injuries                  | 2 (1 to 3)     | 1 (1 to 2)     | -12.3% (-15.3% to -9%)    |
| 19 | Iraq                       | Venomous animal contact                         | 2 (1 to 5)     | 2 (1 to 4)     | -14.9% (-19.8% to -11.6%) |
| 20 | Iraq                       | Adverse effects of medical treatment            | 0 (0 to 0)     | 0 (0 to 0)     | 0% (0% to 0%)             |
| 21 | Iraq                       | Conflict and terrorism                          | 71 (29 to 161) | 25 (10 to 57)  | NA                        |
| 22 | Iraq                       | Cyclist road injuries                           | 15 (10 to 21)  | 13 (9 to 19)   | -10.2% (-17.5% to -1.2%)  |
| 23 | Iraq                       | Drowning                                        | 0 (0 to 0)     | 0 (0 to 0)     | 29.8% (13.7% to 47.3%)    |
| 24 | Iraq                       | Environmental heat and cold exposure            | 3 (2 to 4)     | 3 (2 to 4)     | 2.3% (-3.3% to 8.5%)      |
| 25 | Iraq                       | Executions and police conflict                  | 0 (0 to 0)     | 0 (0 to 0)     | NA                        |
| 26 | Iraq                       | Exposure to forces of nature                    | 0 (0 to 0)     | 0 (0 to 0)     | NA                        |
| 27 | Iraq                       | Falls                                           | 79 (61 to 105) | 85 (64 to 112) | 6.7% (1.2% to 12%)        |
| 28 | Iraq                       | Fire, heat, and hot substances                  | 1 (1 to 2)     | 1 (0 to 1)     | -26.5% (-32.3% to -20.4%) |
| 29 | Iraq                       | Foreign body in eyes                            | 0 (0 to 0)     | 0 (0 to 0)     | 0% (-0.1% to 0.2%)        |
| 30 | Iraq                       | Foreign body in other body part                 | 1 (1 to 3)     | 1 (1 to 3)     | 3.9% (-1% to 7.9%)        |
| 31 | Iraq                       | Motor vehicle road injuries                     | 32 (25 to 41)  | 27 (20 to 34)  | -17.8% (-24.2% to -10.6%) |
| 32 | Iraq                       | Motorcyclist road injuries                      | 9 (7 to 12)    | 8 (6 to 10)    | -15% (-22.5% to -6%)      |
| 33 | Iraq                       | Non-venomous animal contact                     | 4 (2 to 7)     | 3 (2 to 6)     | -15.9% (-23.6% to -8.9%)  |
| 34 | Iraq                       | Other exposure to mechanical forces             | 74 (46 to 116) | 60 (38 to 95)  | -19.3% (-25% to -12.7%)   |
| 35 | Iraq                       | Other road injuries                             | 2 (1 to 3)     | 2 (1 to 3)     | -5.6% (-14.7% to 4.9%)    |
| 36 | Iraq                       | Other transport injuries                        | 5 (3 to 6)     | 5 (4 to 7)     | 5.5% (0.1% to 12%)        |
| 37 | Iraq                       | Other unintentional injuries                    | 40 (26 to 64)  | 29 (19 to 46)  | -28.4% (-33.2% to -23.2%) |
| 38 | Iraq                       | Pedestrian road injuries                        | 24 (18 to 30)  | 17 (13 to 21)  | -31.1% (-36.6% to -25%)   |
| 39 | Iraq                       | Physical violence by firearm                    | 1 (0 to 1)     | 2 (1 to 2)     | 219.1% (183.8% to 263.1%) |
| 40 | Iraq                       | Physical violence by other means                | 25 (18 to 35)  | 32 (23 to 44)  | 28.2% (18.4% to 40.1%)    |
| 41 | Iraq                       | Physical violence by sharp object               | 2 (1 to 3)     | 2 (1 to 4)     | 18% (4.8% to 33.2%)       |
| 42 | Iraq                       | Poisoning by carbon monoxide                    | 0 (0 to 0)     | 0 (0 to 0)     | 44.4% (29.8% to 60.4%)    |
| 43 | Iraq                       | Poisoning by other means                        | 0 (0 to 0)     | 0 (0 to 0)     | -5.9% (-13.3% to 2.3%)    |
| 44 | Iraq                       | Pulmonary aspiration and foreign body in airway | 0 (0 to 1)     | 0 (0 to 0)     | -22.3% (-30.7% to -14.2%) |
| 45 |                            |                                                 |                |                |                           |
| 46 |                            |                                                 |                |                |                           |

|    |         |                                                 |                  |                  |                           |
|----|---------|-------------------------------------------------|------------------|------------------|---------------------------|
| 1  |         |                                                 |                  |                  |                           |
| 2  | Iraq    | Self-harm by firearm                            | 0 (0 to 1)       | 0 (0 to 1)       | 17.4% (4.6% to 32.2%)     |
| 3  | Iraq    | Self-harm by other specified means              | 1 (1 to 2)       | 1 (1 to 2)       | 18% (10.8% to 26%)        |
| 4  | Iraq    | Unintentional firearm injuries                  | 5 (3 to 7)       | 4 (3 to 6)       | -6.5% (-16% to 4.4%)      |
| 5  | Iraq    | Venomous animal contact                         | 2 (1 to 4)       | 2 (1 to 4)       | 8.2% (-0.9% to 19.9%)     |
| 6  | Ireland | Adverse effects of medical treatment            | 0 (0 to 0)       | 0 (0 to 0)       | 0% (0% to 0%)             |
| 7  | Ireland | Conflict and terrorism                          | 0 (0 to 0)       | 0 (0 to 0)       | NA                        |
| 8  | Ireland | Cyclist road injuries                           | 29 (21 to 38)    | 17 (12 to 23)    | -39.9% (-49.5% to -29.6%) |
| 9  | Ireland | Drowning                                        | 0 (0 to 0)       | 0 (0 to 0)       | 49.7% (34.2% to 66.5%)    |
| 10 | Ireland | Environmental heat and cold exposure            | 2 (2 to 3)       | 2 (1 to 3)       | -7.8% (-13.2% to -2.7%)   |
| 11 | Ireland | Executions and police conflict                  | 0 (0 to 0)       | 0 (0 to 0)       | NA                        |
| 12 | Ireland | Exposure to forces of nature                    | 0 (0 to 0)       | 0 (0 to 0)       | NA                        |
| 13 | Ireland | Falls                                           | 215 (166 to 278) | 249 (191 to 323) | 15.5% (10.6% to 20.7%)    |
| 14 | Ireland | Fire, heat, and hot substances                  | 3 (2 to 5)       | 2 (1 to 4)       | -23.1% (-29.8% to -16.4%) |
| 15 | Ireland | Foreign body in eyes                            | 0 (0 to 0)       | 0 (0 to 0)       | 0% (-0.3% to 0.4%)        |
| 16 | Ireland | Foreign body in other body part                 | 2 (1 to 3)       | 2 (1 to 3)       | 2.2% (-2.5% to 7.6%)      |
| 17 | Ireland | Motor vehicle road injuries                     | 35 (27 to 44)    | 18 (13 to 24)    | -49.4% (-57.7% to -39.7%) |
| 18 | Ireland | Motorcyclist road injuries                      | 9 (7 to 12)      | 6 (4 to 8)       | -37.8% (-50.8% to -22%)   |
| 19 | Ireland | Non-venomous animal contact                     | 3 (1 to 5)       | 2 (1 to 3)       | -25% (-29.1% to -21.6%)   |
| 20 | Ireland | Other exposure to mechanical forces             | 55 (34 to 88)    | 44 (27 to 71)    | -19.8% (-27.8% to -12.7%) |
| 21 | Ireland | Other road injuries                             | 1 (1 to 2)       | 1 (1 to 2)       | -13.2% (-27.2% to 3.2%)   |
| 22 | Ireland | Other transport injuries                        | 5 (4 to 7)       | 5 (3 to 7)       | -9.8% (-15.9% to -2.1%)   |
| 23 | Ireland | Other unintentional injuries                    | 27 (17 to 45)    | 24 (15 to 39)    | -12.9% (-20.1% to -6.2%)  |
| 24 | Ireland | Pedestrian road injuries                        | 11 (8 to 14)     | 6 (4 to 8)       | -45.8% (-56.1% to -34.2%) |
| 25 | Ireland | Physical violence by firearm                    | 0 (0 to 1)       | 1 (0 to 1)       | 47.6% (34.8% to 63.3%)    |
| 26 | Ireland | Physical violence by other means                | 13 (9 to 19)     | 13 (9 to 19)     | -0.2% (-6.6% to 6.5%)     |
| 27 | Ireland | Physical violence by sharp object               | 1 (1 to 2)       | 1 (1 to 2)       | -10% (-19.7% to -0.3%)    |
| 28 | Ireland | Poisoning by carbon monoxide                    | 0 (0 to 0)       | 0 (0 to 0)       | 15.2% (5.7% to 25%)       |
| 29 | Ireland | Poisoning by other means                        | 0 (0 to 0)       | 0 (0 to 0)       | -5.7% (-11.2% to 0.2%)    |
| 30 | Ireland | Pulmonary aspiration and foreign body in airway | 1 (1 to 2)       | 1 (0 to 1)       | -14% (-23% to -4.3%)      |
| 31 | Ireland | Self-harm by firearm                            | 0 (0 to 1)       | 0 (0 to 0)       | -16.2% (-31.1% to -1.2%)  |
| 32 | Ireland | Self-harm by other specified means              | 3 (2 to 5)       | 3 (2 to 5)       | -7% (-13.1% to -0.9%)     |
| 33 | Ireland | Unintentional firearm injuries                  | 1 (1 to 2)       | 1 (1 to 2)       | 0.4% (-11.1% to 11.5%)    |
| 34 | Ireland | Venomous animal contact                         | 1 (0 to 2)       | 1 (0 to 2)       | -22.8% (-27.5% to -18.3%) |
| 35 | Israel  | Adverse effects of medical treatment            | 0 (0 to 0)       | 0 (0 to 0)       | 0% (0% to 0%)             |
| 36 | Israel  | Conflict and terrorism                          | 12 (5 to 28)     | 0 (0 to 1)       | NA                        |
| 37 | Israel  | Cyclist road injuries                           | 22 (15 to 29)    | 19 (13 to 25)    | -13.5% (-22.4% to -3.3%)  |
| 38 | Israel  | Drowning                                        | 0 (0 to 0)       | 0 (0 to 0)       | 48.6% (31.3% to 67.1%)    |
| 39 | Israel  | Environmental heat and cold exposure            | 2 (2 to 3)       | 2 (2 to 3)       | -4.5% (-9.9% to 0.6%)     |
| 40 | Israel  | Executions and police conflict                  | 0 (0 to 0)       | 0 (0 to 0)       | NA                        |
| 41 | Israel  | Exposure to forces of nature                    | 0 (0 to 0)       | 0 (0 to 0)       | NA                        |
| 42 | Israel  | Falls                                           | 163 (124 to 213) | 195 (146 to 260) | 20.1% (15.2% to 24.5%)    |
| 43 | Israel  | Fire, heat, and hot substances                  | 2 (1 to 4)       | 2 (1 to 3)       | -9.9% (-14.9% to -5.2%)   |
| 44 | Israel  | Foreign body in eyes                            | 0 (0 to 0)       | 0 (0 to 0)       | 0.3% (0.1% to 0.7%)       |
| 45 |         |                                                 |                  |                  |                           |
| 46 |         |                                                 |                  |                  |                           |



|    |        |                                                 |                  |                  |                           |
|----|--------|-------------------------------------------------|------------------|------------------|---------------------------|
| 1  |        |                                                 |                  |                  |                           |
| 2  | Israel | Foreign body in other body part                 | 2 (1 to 4)       | 2 (1 to 3)       | -8.2% (-13.1% to -3.2%)   |
| 3  | Israel | Motor vehicle road injuries                     | 39 (30 to 49)    | 23 (17 to 29)    | -41.8% (-48.3% to -34.6%) |
| 4  | Israel | Motorcyclist road injuries                      | 7 (5 to 9)       | 8 (6 to 11)      | 21.7% (4.8% to 41.3%)     |
| 5  | Israel | Non-venomous animal contact                     | 2 (1 to 4)       | 2 (1 to 4)       | -15.4% (-19.3% to -11.2%) |
| 6  | Israel | Other exposure to mechanical forces             | 55 (34 to 86)    | 44 (26 to 70)    | -19% (-26.2% to -12%)     |
| 7  | Israel | Other road injuries                             | 1 (1 to 2)       | 1 (1 to 2)       | -15.8% (-25.8% to -5.5%)  |
| 8  | Israel | Other transport injuries                        | 4 (3 to 6)       | 4 (3 to 6)       | -4.1% (-7.8% to -0.1%)    |
| 9  | Israel | Other unintentional injuries                    | 29 (18 to 46)    | 23 (14 to 36)    | -21.1% (-26.4% to -15.1%) |
| 10 | Israel | Pedestrian road injuries                        | 12 (9 to 15)     | 8 (6 to 10)      | -34.8% (-42.2% to -27.4%) |
| 11 | Israel | Physical violence by firearm                    | 1 (0 to 1)       | 1 (1 to 2)       | 97.3% (72.2% to 127.6%)   |
| 12 | Israel | Physical violence by other means                | 22 (16 to 32)    | 21 (15 to 30)    | -6.2% (-14.9% to 2.4%)    |
| 13 | Israel | Physical violence by sharp object               | 3 (2 to 4)       | 3 (2 to 5)       | 16.4% (1.1% to 33.1%)     |
| 14 | Israel | Poisoning by carbon monoxide                    | 0 (0 to 0)       | 0 (0 to 0)       | 6% (-3.2% to 15.6%)       |
| 15 | Israel | Poisoning by other means                        | 0 (0 to 0)       | 0 (0 to 0)       | -8.4% (-14.9% to -1.9%)   |
| 16 | Israel | Pulmonary aspiration and foreign body in airway | 1 (1 to 2)       | 1 (1 to 2)       | -27.1% (-33.4% to -19.4%) |
| 17 | Israel | Self-harm by firearm                            | 0 (0 to 1)       | 0 (0 to 0)       | -30.9% (-41% to -20.3%)   |
| 18 | Israel | Self-harm by other specified means              | 2 (1 to 3)       | 2 (1 to 2)       | -17.8% (-22.9% to -12.8%) |
| 19 | Israel | Unintentional firearm injuries                  | 2 (1 to 3)       | 1 (1 to 2)       | -37.4% (-46.9% to -28.2%) |
| 20 | Israel | Venomous animal contact                         | 1 (0 to 2)       | 1 (0 to 2)       | -15.2% (-20.6% to -9.7%)  |
| 21 | Italy  | Adverse effects of medical treatment            | 0 (0 to 0)       | 0 (0 to 0)       | 0% (0% to 0%)             |
| 22 | Italy  | Conflict and terrorism                          | 0 (0 to 0)       | 0 (0 to 0)       | NA                        |
| 23 | Italy  | Cyclist road injuries                           | 25 (17 to 36)    | 18 (13 to 24)    | -28.8% (-33.9% to -23.4%) |
| 24 | Italy  | Drowning                                        | 0 (0 to 0)       | 0 (0 to 0)       | 2.3% (-1.8% to 5.5%)      |
| 25 | Italy  | Environmental heat and cold exposure            | 4 (2 to 6)       | 2 (2 to 4)       | -37.3% (-43.1% to -31%)   |
| 26 | Italy  | Executions and police conflict                  | 0 (0 to 0)       | 0 (0 to 0)       | NA                        |
| 27 | Italy  | Exposure to forces of nature                    | 0 (0 to 0)       | 0 (0 to 0)       | NA                        |
| 28 | Italy  | Falls                                           | 276 (215 to 355) | 231 (179 to 299) | -16.3% (-20.8% to -11.9%) |
| 29 | Italy  | Fire, heat, and hot substances                  | 2 (1 to 3)       | 1 (1 to 2)       | -39.3% (-45.5% to -30.7%) |
| 30 | Italy  | Foreign body in eyes                            | 0 (0 to 0)       | 0 (0 to 0)       | 0.6% (0.2% to 1.2%)       |
| 31 | Italy  | Foreign body in other body part                 | 2 (1 to 5)       | 2 (1 to 5)       | -5.9% (-16.8% to 6.9%)    |
| 32 | Italy  | Motor vehicle road injuries                     | 37 (26 to 50)    | 27 (19 to 36)    | -27.2% (-31.6% to -22.4%) |
| 33 | Italy  | Motorcyclist road injuries                      | 17 (12 to 24)    | 17 (12 to 23)    | 0.5% (-7.5% to 9.7%)      |
| 34 | Italy  | Non-venomous animal contact                     | 2 (1 to 4)       | 1 (0 to 1)       | -64.7% (-70.5% to -56%)   |
| 35 | Italy  | Other exposure to mechanical forces             | 50 (30 to 82)    | 31 (19 to 49)    | -38% (-41.5% to -34%)     |
| 36 | Italy  | Other road injuries                             | 3 (2 to 5)       | 3 (2 to 5)       | 9.4% (1.5% to 19%)        |
| 37 | Italy  | Other transport injuries                        | 5 (4 to 7)       | 5 (4 to 7)       | 4.9% (2.7% to 7.6%)       |
| 38 | Italy  | Other unintentional injuries                    | 29 (17 to 48)    | 16 (10 to 25)    | -45.9% (-49.4% to -41.5%) |
| 39 | Italy  | Pedestrian road injuries                        | 10 (7 to 14)     | 7 (5 to 9)       | -29.5% (-34.1% to -24.1%) |
| 40 | Italy  | Physical violence by firearm                    | 2 (1 to 2)       | 1 (1 to 2)       | -37% (-44.4% to -27.6%)   |
| 41 | Italy  | Physical violence by other means                | 18 (11 to 26)    | 10 (6 to 14)     | -45.4% (-48.4% to -41.5%) |
| 42 | Italy  | Physical violence by sharp object               | 2 (1 to 4)       | 1 (1 to 2)       | -43.5% (-49.5% to -35.8%) |
| 43 | Italy  | Poisoning by carbon monoxide                    | 0 (0 to 0)       | 0 (0 to 0)       | -29.2% (-41.2% to -8.3%)  |
| 44 | Italy  | Poisoning by other means                        | 0 (0 to 1)       | 0 (0 to 0)       | -47% (-51.5% to -41.3%)   |
| 45 |        |                                                 |                  |                  |                           |
| 46 |        |                                                 |                  |                  |                           |

|    |         |                                                 |                 |                 |                           |
|----|---------|-------------------------------------------------|-----------------|-----------------|---------------------------|
| 1  |         |                                                 |                 |                 |                           |
| 2  | Italy   | Pulmonary aspiration and foreign body in airway | 1 (1 to 2)      | 1 (1 to 2)      | -6.9% (-13.3% to -0.5%)   |
| 3  | Italy   | Self-harm by firearm                            | 0 (0 to 1)      | 0 (0 to 1)      | -4.8% (-13% to 6%)        |
| 4  | Italy   | Self-harm by other specified means              | 2 (1 to 3)      | 1 (1 to 2)      | -37.7% (-41.6% to -34.2%) |
| 5  | Italy   | Unintentional firearm injuries                  | 2 (1 to 3)      | 1 (0 to 2)      | -44.7% (-50.8% to -36.8%) |
| 6  | Italy   | Venomous animal contact                         | 2 (1 to 5)      | 1 (0 to 1)      | -70.5% (-75.4% to -64%)   |
| 7  | Jamaica | Adverse effects of medical treatment            | 0 (0 to 0)      | 0 (0 to 0)      | 0% (0% to 0%)             |
| 8  | Jamaica | Conflict and terrorism                          | 6 (2 to 14)     | 0 (0 to 0)      | NA                        |
| 9  | Jamaica | Cyclist road injuries                           | 23 (17 to 31)   | 21 (16 to 29)   | -6.6% (-14.6% to 1.4%)    |
| 10 | Jamaica | Drowning                                        | 0 (0 to 0)      | 0 (0 to 1)      | 49.8% (30% to 71.5%)      |
| 11 | Jamaica | Environmental heat and cold exposure            | 10 (7 to 15)    | 11 (8 to 16)    | 6.3% (1.9% to 10.7%)      |
| 12 | Jamaica | Executions and police conflict                  | 0 (0 to 0)      | 0 (0 to 0)      | NA                        |
| 13 | Jamaica | Exposure to forces of nature                    | 0 (0 to 0)      | 0 (0 to 0)      | NA                        |
| 14 | Jamaica | Falls                                           | 41 (31 to 55)   | 59 (46 to 78)   | 42.7% (37.4% to 49%)      |
| 15 | Jamaica | Fire, heat, and hot substances                  | 4 (2 to 6)      | 4 (2 to 6)      | -0.3% (-5.7% to 7.1%)     |
| 16 | Jamaica | Foreign body in eyes                            | 0 (0 to 0)      | 0 (0 to 0)      | 0.6% (0.3% to 1.1%)       |
| 17 | Jamaica | Foreign body in other body part                 | 2 (1 to 5)      | 1 (1 to 3)      | -42.4% (-50.1% to -35.2%) |
| 18 | Jamaica | Motor vehicle road injuries                     | 14 (10 to 18)   | 16 (12 to 21)   | 20.4% (9.4% to 33.1%)     |
| 19 | Jamaica | Motorcyclist road injuries                      | 9 (7 to 12)     | 9 (7 to 12)     | -1.1% (-11% to 8.4%)      |
| 20 | Jamaica | Non-venomous animal contact                     | 4 (2 to 7)      | 3 (2 to 5)      | -20.8% (-25.1% to -16.2%) |
| 21 | Jamaica | Other exposure to mechanical forces             | 50 (28 to 84)   | 49 (28 to 83)   | -0.8% (-8.1% to 7.6%)     |
| 22 | Jamaica | Other road injuries                             | 3 (2 to 6)      | 3 (2 to 5)      | -9% (-18% to 0.7%)        |
| 23 | Jamaica | Other transport injuries                        | 5 (4 to 7)      | 4 (3 to 6)      | -14.2% (-19.4% to -7.9%)  |
| 24 | Jamaica | Other unintentional injuries                    | 16 (10 to 27)   | 15 (9 to 25)    | -7.7% (-13.4% to -1.9%)   |
| 25 | Jamaica | Pedestrian road injuries                        | 9 (7 to 12)     | 10 (7 to 13)    | 7.7% (-1.3% to 16.8%)     |
| 26 | Jamaica | Physical violence by firearm                    | 2 (1 to 3)      | 3 (2 to 4)      | 27.5% (11.6% to 45.7%)    |
| 27 | Jamaica | Physical violence by other means                | 14 (10 to 21)   | 15 (10 to 22)   | 5.9% (-3.6% to 17.3%)     |
| 28 | Jamaica | Physical violence by sharp object               | 6 (4 to 10)     | 5 (3 to 8)      | -14.9% (-23.5% to -5.2%)  |
| 29 | Jamaica | Poisoning by carbon monoxide                    | 0 (0 to 0)      | 0 (0 to 0)      | 6.1% (-4.8% to 16.8%)     |
| 30 | Jamaica | Poisoning by other means                        | 0 (0 to 0)      | 0 (0 to 0)      | -1.2% (-7.8% to 5.7%)     |
| 31 | Jamaica | Pulmonary aspiration and foreign body in airway | 1 (0 to 1)      | 1 (0 to 1)      | 7% (-5.1% to 21.3%)       |
| 32 | Jamaica | Self-harm by firearm                            | 0 (0 to 0)      | 0 (0 to 0)      | 38.7% (23.8% to 60.1%)    |
| 33 | Jamaica | Self-harm by other specified means              | 0 (0 to 0)      | 0 (0 to 0)      | 8.2% (-0.1% to 16.1%)     |
| 34 | Jamaica | Unintentional firearm injuries                  | 14 (9 to 21)    | 11 (7 to 16)    | -23.6% (-32.4% to -14%)   |
| 35 | Jamaica | Venomous animal contact                         | 6 (3 to 12)     | 5 (3 to 10)     | -18.5% (-22% to -14.2%)   |
| 36 | Japan   | Adverse effects of medical treatment            | 0 (0 to 0)      | 0 (0 to 0)      | 0% (0% to 0%)             |
| 37 | Japan   | Conflict and terrorism                          | 0 (0 to 0)      | 0 (0 to 0)      | NA                        |
| 38 | Japan   | Cyclist road injuries                           | 20 (13 to 28)   | 12 (8 to 18)    | -39.5% (-43.4% to -35.7%) |
| 39 | Japan   | Drowning                                        | 0 (0 to 1)      | 1 (0 to 1)      | 26.9% (22.8% to 31.7%)    |
| 40 | Japan   | Environmental heat and cold exposure            | 2 (1 to 3)      | 2 (1 to 3)      | 6.4% (4.2% to 9.2%)       |
| 41 | Japan   | Executions and police conflict                  | 0 (0 to 0)      | 0 (0 to 0)      | NA                        |
| 42 | Japan   | Exposure to forces of nature                    | 0 (0 to 0)      | 0 (0 to 0)      | NA                        |
| 43 | Japan   | Falls                                           | 112 (81 to 154) | 110 (79 to 153) | -1.9% (-4.4% to 0.5%)     |
| 44 | Japan   | Fire, heat, and hot substances                  | 2 (1 to 2)      | 1 (1 to 2)      | -10.4% (-14.6% to -6.9%)  |
| 45 |         |                                                 |                 |                 |                           |
| 46 |         |                                                 |                 |                 |                           |

|    |        |                                                 |                |                |                           |
|----|--------|-------------------------------------------------|----------------|----------------|---------------------------|
| 1  |        |                                                 |                |                |                           |
| 2  | Japan  | Foreign body in eyes                            | 0 (0 to 0)     | 0 (0 to 0)     | -2.8% (-4.2% to -1.1%)    |
| 3  | Japan  | Foreign body in other body part                 | 3 (1 to 7)     | 3 (1 to 7)     | -3.4% (-4.7% to -1.9%)    |
| 4  | Japan  | Motor vehicle road injuries                     | 30 (20 to 41)  | 15 (10 to 22)  | -47.5% (-50.5% to -44.6%) |
| 5  | Japan  | Motorcyclist road injuries                      | 20 (14 to 27)  | 11 (7 to 15)   | -46.2% (-49.5% to -42.9%) |
| 6  | Japan  | Non-venomous animal contact                     | 5 (3 to 10)    | 5 (2 to 8)     | -15.2% (-16.6% to -13.9%) |
| 7  | Japan  | Other exposure to mechanical forces             | 91 (48 to 162) | 82 (43 to 148) | -9.2% (-13.2% to -6.4%)   |
| 8  | Japan  | Other road injuries                             | 2 (1 to 3)     | 1 (1 to 2)     | -21.9% (-26% to -17.1%)   |
| 9  | Japan  | Other transport injuries                        | 5 (4 to 7)     | 5 (3 to 6)     | -8.3% (-11.5% to -5.3%)   |
| 10 | Japan  | Other unintentional injuries                    | 23 (14 to 40)  | 20 (12 to 35)  | -13.2% (-15.8% to -10.5%) |
| 11 | Japan  | Pedestrian road injuries                        | 11 (8 to 14)   | 6 (4 to 9)     | -39.7% (-45.1% to -34.1%) |
| 12 | Japan  | Physical violence by firearm                    | 0 (0 to 1)     | 1 (0 to 1)     | 44.7% (37.8% to 52.8%)    |
| 13 | Japan  | Physical violence by other means                | 12 (8 to 17)   | 12 (8 to 18)   | 2.2% (-1.9% to 6.3%)      |
| 14 | Japan  | Physical violence by sharp object               | 1 (1 to 2)     | 1 (1 to 2)     | 3.7% (-1.8% to 8.9%)      |
| 15 | Japan  | Poisoning by carbon monoxide                    | 0 (0 to 0)     | 0 (0 to 0)     | 7.1% (4% to 10.3%)        |
| 16 | Japan  | Poisoning by other means                        | 0 (0 to 0)     | 0 (0 to 0)     | -7.4% (-9.7% to -5.1%)    |
| 17 | Japan  | Pulmonary aspiration and foreign body in airway | 0 (0 to 1)     | 0 (0 to 1)     | -15.1% (-17.5% to -12.4%) |
| 18 | Japan  | Self-harm by firearm                            | 0 (0 to 0)     | 0 (0 to 0)     | 36.5% (26% to 45.8%)      |
| 19 | Japan  | Self-harm by other specified means              | 2 (1 to 4)     | 2 (2 to 4)     | 6.5% (2.7% to 10.7%)      |
| 20 | Japan  | Unintentional firearm injuries                  | 1 (0 to 2)     | 1 (0 to 2)     | -1% (-5.3% to 3%)         |
| 21 | Japan  | Venomous animal contact                         | 2 (1 to 4)     | 1 (0 to 3)     | -15.3% (-17.4% to -12.9%) |
| 22 | Jordan | Adverse effects of medical treatment            | 0 (0 to 0)     | 0 (0 to 0)     | 0% (0% to 0%)             |
| 23 | Jordan | Conflict and terrorism                          | 0 (0 to 0)     | 0 (0 to 0)     | NA                        |
| 24 | Jordan | Cyclist road injuries                           | 15 (10 to 21)  | 14 (10 to 19)  | -7.3% (-15.6% to 3.1%)    |
| 25 | Jordan | Drowning                                        | 0 (0 to 0)     | 0 (0 to 1)     | 99.6% (70.2% to 130.9%)   |
| 26 | Jordan | Environmental heat and cold exposure            | 3 (2 to 4)     | 3 (2 to 4)     | 0.4% (-5.4% to 5.7%)      |
| 27 | Jordan | Executions and police conflict                  | 0 (0 to 0)     | 0 (0 to 0)     | NA                        |
| 28 | Jordan | Exposure to forces of nature                    | 0 (0 to 0)     | 0 (0 to 0)     | NA                        |
| 29 | Jordan | Falls                                           | 70 (54 to 91)  | 85 (65 to 114) | 22.6% (16.2% to 29.7%)    |
| 30 | Jordan | Fire, heat, and hot substances                  | 1 (1 to 2)     | 1 (0 to 1)     | -34.7% (-41.5% to -28.1%) |
| 31 | Jordan | Foreign body in eyes                            | 0 (0 to 0)     | 0 (0 to 0)     | 1% (0.4% to 1.9%)         |
| 32 | Jordan | Foreign body in other body part                 | 1 (1 to 3)     | 1 (1 to 3)     | 1.7% (-4% to 7.4%)        |
| 33 | Jordan | Motor vehicle road injuries                     | 35 (28 to 45)  | 24 (19 to 31)  | -31.6% (-37% to -25.4%)   |
| 34 | Jordan | Motorcyclist road injuries                      | 8 (6 to 11)    | 6 (4 to 7)     | -29% (-36.5% to -20.4%)   |
| 35 | Jordan | Non-venomous animal contact                     | 3 (2 to 6)     | 3 (2 to 6)     | 3% (-1.3% to 8.7%)        |
| 36 | Jordan | Other exposure to mechanical forces             | 22 (13 to 35)  | 21 (12 to 34)  | -3.5% (-12.7% to 4.7%)    |
| 37 | Jordan | Other road injuries                             | 2 (1 to 3)     | 2 (1 to 3)     | -8% (-17.8% to 3%)        |
| 38 | Jordan | Other transport injuries                        | 8 (6 to 11)    | 7 (5 to 9)     | -21% (-26.7% to -15.1%)   |
| 39 | Jordan | Other unintentional injuries                    | 19 (12 to 30)  | 16 (10 to 26)  | -16.8% (-24% to -8.7%)    |
| 40 | Jordan | Pedestrian road injuries                        | 25 (20 to 31)  | 16 (12 to 21)  | -36.3% (-41.5% to -30.2%) |
| 41 | Jordan | Physical violence by firearm                    | 0 (0 to 1)     | 1 (1 to 1)     | 133.4% (105.7% to 166.4%) |
| 42 | Jordan | Physical violence by other means                | 17 (12 to 23)  | 16 (11 to 22)  | -4.7% (-11.3% to 2.2%)    |
| 43 | Jordan | Physical violence by sharp object               | 2 (1 to 4)     | 2 (1 to 3)     | -4.7% (-14.4% to 5.1%)    |
| 44 | Jordan | Poisoning by carbon monoxide                    | 0 (0 to 0)     | 0 (0 to 0)     | 4% (-9.4% to 18.3%)       |
| 45 |        |                                                 |                |                |                           |
| 46 |        |                                                 |                |                |                           |

|    |            |                                                 |                  |                  |                           |
|----|------------|-------------------------------------------------|------------------|------------------|---------------------------|
| 1  |            |                                                 |                  |                  |                           |
| 2  | Jordan     | Poisoning by other means                        | 0 (0 to 0)       | 0 (0 to 0)       | -27.1% (-36.1% to -17.9%) |
| 3  | Jordan     | Pulmonary aspiration and foreign body in airway | 0 (0 to 1)       | 0 (0 to 1)       | -18% (-25.8% to -10.6%)   |
| 4  | Jordan     | Self-harm by firearm                            | 0 (0 to 0)       | 0 (0 to 0)       | 16.1% (3.4% to 32.1%)     |
| 5  | Jordan     | Self-harm by other specified means              | 1 (1 to 1)       | 1 (0 to 1)       | -18.7% (-25.4% to -11.6%) |
| 6  | Jordan     | Unintentional firearm injuries                  | 2 (1 to 3)       | 2 (1 to 3)       | 9.8% (-2.9% to 22.6%)     |
| 7  | Jordan     | Venomous animal contact                         | 2 (1 to 4)       | 2 (1 to 4)       | 2% (-3.8% to 7.6%)        |
| 8  | Kazakhstan | Adverse effects of medical treatment            | 0 (0 to 0)       | 0 (0 to 0)       | 0% (0% to 0%)             |
| 9  | Kazakhstan | Conflict and terrorism                          | 0 (0 to 0)       | 0 (0 to 0)       | NA                        |
| 10 | Kazakhstan | Cyclist road injuries                           | 25 (17 to 35)    | 25 (16 to 34)    | -2.1% (-12.6% to 9.8%)    |
| 11 | Kazakhstan | Drowning                                        | 1 (0 to 1)       | 1 (0 to 1)       | 1.6% (-9.3% to 13.9%)     |
| 12 | Kazakhstan | Environmental heat and cold exposure            | 4 (3 to 6)       | 6 (5 to 9)       | 63.4% (42.2% to 88.6%)    |
| 13 | Kazakhstan | Executions and police conflict                  | 0 (0 to 0)       | 0 (0 to 0)       | NA                        |
| 14 | Kazakhstan | Exposure to forces of nature                    | 0 (0 to 0)       | 0 (0 to 0)       | NA                        |
| 15 | Kazakhstan | Falls                                           | 162 (124 to 214) | 173 (133 to 225) | 7.3% (2.3% to 12.4%)      |
| 16 | Kazakhstan | Fire, heat, and hot substances                  | 5 (3 to 8)       | 3 (2 to 6)       | -24.7% (-32.4% to -17%)   |
| 17 | Kazakhstan | Foreign body in eyes                            | 0 (0 to 0)       | 0 (0 to 0)       | 0.6% (0.3% to 1.3%)       |
| 18 | Kazakhstan | Foreign body in other body part                 | 2 (1 to 4)       | 2 (1 to 4)       | -0.2% (-5.7% to 5.2%)     |
| 19 | Kazakhstan | Motor vehicle road injuries                     | 88 (70 to 111)   | 89 (69 to 110)   | 0.4% (-10.1% to 10.6%)    |
| 20 | Kazakhstan | Motorcyclist road injuries                      | 6 (4 to 8)       | 5 (4 to 7)       | -11.2% (-23.1% to 2.2%)   |
| 21 | Kazakhstan | Non-venomous animal contact                     | 3 (1 to 5)       | 2 (1 to 4)       | -16.1% (-21.2% to -10.8%) |
| 22 | Kazakhstan | Other exposure to mechanical forces             | 78 (50 to 120)   | 67 (42 to 104)   | -14.4% (-21% to -7.9%)    |
| 23 | Kazakhstan | Other road injuries                             | 2 (1 to 4)       | 2 (1 to 4)       | -1% (-12.5% to 11.2%)     |
| 24 | Kazakhstan | Other transport injuries                        | 5 (4 to 7)       | 5 (3 to 6)       | -11.2% (-18% to -3.2%)    |
| 25 | Kazakhstan | Other unintentional injuries                    | 21 (13 to 33)    | 20 (13 to 33)    | -1.5% (-7.1% to 3.1%)     |
| 26 | Kazakhstan | Pedestrian road injuries                        | 35 (27 to 45)    | 26 (20 to 33)    | -25.3% (-34.3% to -15.4%) |
| 27 | Kazakhstan | Physical violence by firearm                    | 0 (0 to 0)       | 0 (0 to 0)       | 16.7% (-3.1% to 38%)      |
| 28 | Kazakhstan | Physical violence by other means                | 32 (23 to 44)    | 21 (15 to 29)    | -33.6% (-41.3% to -25.4%) |
| 29 | Kazakhstan | Physical violence by sharp object               | 5 (3 to 8)       | 3 (2 to 5)       | -36.5% (-47.1% to -24.8%) |
| 30 | Kazakhstan | Poisoning by carbon monoxide                    | 0 (0 to 0)       | 0 (0 to 0)       | 22.8% (6.3% to 40.2%)     |
| 31 | Kazakhstan | Poisoning by other means                        | 1 (0 to 1)       | 0 (0 to 1)       | -34.4% (-42.2% to -26.2%) |
| 32 | Kazakhstan | Pulmonary aspiration and foreign body in airway | 1 (1 to 3)       | 1 (1 to 2)       | -29% (-36.5% to -21.6%)   |
| 33 | Kazakhstan | Self-harm by firearm                            | 1 (0 to 1)       | 1 (0 to 1)       | -0.9% (-19.5% to 17.3%)   |
| 34 | Kazakhstan | Self-harm by other specified means              | 5 (3 to 7)       | 5 (4 to 8)       | 15.7% (9.2% to 22.6%)     |
| 35 | Kazakhstan | Unintentional firearm injuries                  | 1 (1 to 2)       | 1 (0 to 1)       | -23.2% (-35.6% to -10.5%) |
| 36 | Kazakhstan | Venomous animal contact                         | 2 (1 to 5)       | 2 (1 to 4)       | -14.9% (-19.8% to -9.5%)  |
| 37 | Kenya      | Adverse effects of medical treatment            | 0 (0 to 0)       | 0 (0 to 0)       | 0% (0% to 0%)             |
| 38 | Kenya      | Conflict and terrorism                          | 0 (0 to 0)       | 1 (0 to 2)       | NA                        |
| 39 | Kenya      | Cyclist road injuries                           | 33 (24 to 46)    | 36 (26 to 50)    | 7.7% (5.5% to 10%)        |
| 40 | Kenya      | Drowning                                        | 0 (0 to 0)       | 0 (0 to 0)       | -19.5% (-23.1% to -15.8%) |
| 41 | Kenya      | Environmental heat and cold exposure            | 3 (2 to 4)       | 3 (2 to 4)       | 0.7% (-1.7% to 2.7%)      |
| 42 | Kenya      | Executions and police conflict                  | 0 (0 to 0)       | 0 (0 to 0)       | NA                        |
| 43 | Kenya      | Exposure to forces of nature                    | 1 (1 to 2)       | 0 (0 to 0)       | NA                        |
| 44 | Kenya      | Falls                                           | 51 (40 to 65)    | 54 (42 to 70)    | 7.1% (6% to 8.3%)         |
| 45 |            |                                                 |                  |                  |                           |
| 46 |            |                                                 |                  |                  |                           |

|    |          |                                                 |               |               |                           |
|----|----------|-------------------------------------------------|---------------|---------------|---------------------------|
| 1  |          |                                                 |               |               |                           |
| 2  | Kenya    | Fire, heat, and hot substances                  | 2 (1 to 3)    | 2 (1 to 3)    | -8.5% (-10.2% to -6.9%)   |
| 3  | Kenya    | Foreign body in eyes                            | 0 (0 to 0)    | 0 (0 to 0)    | -0.4% (-1.2% to 0%)       |
| 4  | Kenya    | Foreign body in other body part                 | 4 (2 to 7)    | 4 (2 to 7)    | -0.5% (-2.2% to 1.4%)     |
| 5  | Kenya    | Motor vehicle road injuries                     | 30 (21 to 40) | 31 (23 to 42) | 5.9% (4.1% to 7.7%)       |
| 6  | Kenya    | Motorcyclist road injuries                      | 9 (6 to 12)   | 10 (7 to 13)  | 9% (6.6% to 11.2%)        |
| 7  | Kenya    | Non-venomous animal contact                     | 9 (5 to 15)   | 8 (5 to 14)   | -6.2% (-7.6% to -4.5%)    |
| 8  | Kenya    | Other exposure to mechanical forces             | 21 (12 to 34) | 20 (12 to 33) | -3.6% (-6.2% to -0.7%)    |
| 9  | Kenya    | Other road injuries                             | 1 (1 to 2)    | 1 (1 to 2)    | -0.5% (-3% to 2.1%)       |
| 10 | Kenya    | Other transport injuries                        | 6 (4 to 8)    | 6 (4 to 8)    | -3.2% (-4.7% to -1.8%)    |
| 11 | Kenya    | Other unintentional injuries                    | 9 (6 to 14)   | 8 (5 to 14)   | -7.2% (-12.2% to -2.5%)   |
| 12 | Kenya    | Pedestrian road injuries                        | 55 (42 to 69) | 53 (40 to 66) | -3.6% (-5.1% to -2%)      |
| 13 | Kenya    | Physical violence by firearm                    | 0 (0 to 0)    | 0 (0 to 1)    | 10.5% (8.3% to 12.8%)     |
| 14 | Kenya    | Physical violence by other means                | 11 (8 to 16)  | 12 (8 to 17)  | 6.9% (5.2% to 8.3%)       |
| 15 | Kenya    | Physical violence by sharp object               | 3 (2 to 5)    | 3 (2 to 5)    | 7% (5% to 9%)             |
| 16 | Kenya    | Poisoning by carbon monoxide                    | 0 (0 to 0)    | 0 (0 to 0)    | 8.8% (5.3% to 13.1%)      |
| 17 | Kenya    | Poisoning by other means                        | 0 (0 to 0)    | 0 (0 to 0)    | -8.6% (-11.1% to -6.5%)   |
| 18 | Kenya    | Pulmonary aspiration and foreign body in airway | 0 (0 to 1)    | 0 (0 to 1)    | -11.1% (-13.2% to -9%)    |
| 19 | Kenya    | Self-harm by firearm                            | 0 (0 to 0)    | 0 (0 to 0)    | 24.2% (17.7% to 32.1%)    |
| 20 | Kenya    | Self-harm by other specified means              | 1 (1 to 2)    | 1 (1 to 2)    | -0.5% (-2.9% to 2%)       |
| 21 | Kenya    | Unintentional firearm injuries                  | 2 (1 to 3)    | 2 (1 to 3)    | -13.4% (-18.7% to -8%)    |
| 22 | Kiribati | Venomous animal contact                         | 4 (1 to 8)    | 3 (1 to 7)    | -11.4% (-15.4% to -8.4%)  |
| 23 | Kiribati | Adverse effects of medical treatment            | 0 (0 to 0)    | 0 (0 to 0)    | 0% (0% to 0%)             |
| 24 | Kiribati | Conflict and terrorism                          | 0 (0 to 0)    | 0 (0 to 0)    | NA                        |
| 25 | Kiribati | Cyclist road injuries                           | 10 (7 to 14)  | 10 (6 to 14)  | -2.1% (-10.9% to 6.7%)    |
| 26 | Kiribati | Drowning                                        | 0 (0 to 1)    | 0 (0 to 1)    | -15% (-21.9% to -7.4%)    |
| 27 | Kiribati | Environmental heat and cold exposure            | 2 (1 to 3)    | 2 (2 to 4)    | 12.3% (6% to 19.2%)       |
| 28 | Kiribati | Executions and police conflict                  | 0 (0 to 0)    | 0 (0 to 0)    | NA                        |
| 29 | Kiribati | Exposure to forces of nature                    | 0 (0 to 0)    | 0 (0 to 0)    | NA                        |
| 30 | Kiribati | Falls                                           | 30 (23 to 40) | 42 (32 to 56) | 38% (32.6% to 44.1%)      |
| 31 | Kiribati | Fire, heat, and hot substances                  | 1 (1 to 2)    | 1 (1 to 2)    | 5.3% (-0.6% to 13.3%)     |
| 32 | Kiribati | Foreign body in eyes                            | 0 (0 to 0)    | 0 (0 to 0)    | -0.8% (-1.3% to -0.4%)    |
| 33 | Kiribati | Foreign body in other body part                 | 1 (0 to 1)    | 1 (0 to 1)    | -1% (-5% to 4.2%)         |
| 34 | Kiribati | Motor vehicle road injuries                     | 19 (15 to 25) | 16 (12 to 22) | -15.4% (-23.4% to -6.9%)  |
| 35 | Kiribati | Motorcyclist road injuries                      | 14 (11 to 19) | 22 (17 to 29) | 57.3% (40% to 76.7%)      |
| 36 | Kiribati | Non-venomous animal contact                     | 5 (3 to 9)    | 5 (3 to 8)    | -1.8% (-6.5% to 2.4%)     |
| 37 | Kiribati | Other exposure to mechanical forces             | 10 (6 to 17)  | 9 (5 to 16)   | -8.8% (-14.9% to -2.7%)   |
| 38 | Kiribati | Other road injuries                             | 1 (1 to 2)    | 1 (1 to 2)    | -4.5% (-15.4% to 7.9%)    |
| 39 | Kiribati | Other transport injuries                        | 6 (5 to 8)    | 6 (4 to 7)    | -12.9% (-19.9% to -6.6%)  |
| 40 | Kiribati | Other unintentional injuries                    | 5 (3 to 8)    | 4 (3 to 7)    | -6% (-11.4% to -0.1%)     |
| 41 | Kiribati | Pedestrian road injuries                        | 8 (6 to 11)   | 5 (4 to 7)    | -34.4% (-42.6% to -25%)   |
| 42 | Kiribati | Physical violence by firearm                    | 0 (0 to 0)    | 0 (0 to 0)    | -4.7% (-15.5% to 6.8%)    |
| 43 | Kiribati | Physical violence by other means                | 25 (18 to 35) | 19 (13 to 26) | -24.8% (-30.3% to -19.2%) |
| 44 | Kiribati | Physical violence by sharp object               | 2 (1 to 4)    | 2 (1 to 3)    | -21.9% (-29.9% to -12.9%) |
| 45 |          |                                                 |               |               |                           |
| 46 |          |                                                 |               |               |                           |

|    |            |                                                 |                  |                 |                           |
|----|------------|-------------------------------------------------|------------------|-----------------|---------------------------|
| 1  |            |                                                 |                  |                 |                           |
| 2  | Kiribati   | Poisoning by carbon monoxide                    | 0 (0 to 0)       | 0 (0 to 0)      | 21% (6.9% to 37.8%)       |
| 3  | Kiribati   | Poisoning by other means                        | 0 (0 to 0)       | 0 (0 to 0)      | -19.6% (-27% to -11.3%)   |
| 4  | Kiribati   | Pulmonary aspiration and foreign body in airway | 0 (0 to 0)       | 0 (0 to 0)      | -1.7% (-12.7% to 8.9%)    |
| 5  | Kiribati   | Self-harm by firearm                            | 1 (0 to 1)       | 1 (0 to 1)      | -5% (-23.5% to 17.5%)     |
| 6  | Kiribati   | Self-harm by other specified means              | 4 (3 to 6)       | 3 (2 to 5)      | -15.1% (-21.5% to -8%)    |
| 7  | Kiribati   | Unintentional firearm injuries                  | 1 (1 to 2)       | 1 (1 to 2)      | 5.7% (-2.9% to 14.2%)     |
| 8  | Kiribati   | Venomous animal contact                         | 3 (1 to 6)       | 3 (1 to 6)      | 2.5% (-3.2% to 9%)        |
| 9  | Kuwait     | Adverse effects of medical treatment            | 0 (0 to 0)       | 0 (0 to 0)      | 0% (0% to 0%)             |
| 10 | Kuwait     | Conflict and terrorism                          | 366 (149 to 827) | 0 (0 to 0)      | NA                        |
| 11 | Kuwait     | Cyclist road injuries                           | 23 (16 to 31)    | 18 (12 to 24)   | -22.4% (-30.5% to -13.7%) |
| 12 | Kuwait     | Drowning                                        | 0 (0 to 0)       | 0 (0 to 1)      | 87.6% (61.2% to 127.6%)   |
| 13 | Kuwait     | Environmental heat and cold exposure            | 3 (2 to 4)       | 3 (2 to 4)      | 2.9% (-2.2% to 8.8%)      |
| 14 | Kuwait     | Executions and police conflict                  | 0 (0 to 0)       | 0 (0 to 0)      | NA                        |
| 15 | Kuwait     | Exposure to forces of nature                    | 0 (0 to 0)       | 0 (0 to 0)      | NA                        |
| 16 | Kuwait     | Falls                                           | 96 (73 to 128)   | 111 (83 to 147) | 14.9% (10% to 20%)        |
| 17 | Kuwait     | Fire, heat, and hot substances                  | 1 (0 to 1)       | 1 (0 to 1)      | 2.7% (-2.6% to 7.9%)      |
| 18 | Kuwait     | Foreign body in eyes                            | 0 (0 to 0)       | 0 (0 to 0)      | -2.4% (-4.6% to -0.9%)    |
| 19 | Kuwait     | Foreign body in other body part                 | 1 (1 to 3)       | 1 (1 to 3)      | -0.7% (-4.9% to 5.3%)     |
| 20 | Kuwait     | Motor vehicle road injuries                     | 57 (45 to 71)    | 40 (32 to 51)   | -28.8% (-36.3% to -21.2%) |
| 21 | Kuwait     | Motorcyclist road injuries                      | 10 (8 to 14)     | 9 (7 to 12)     | -13.9% (-24.9% to -2.1%)  |
| 22 | Kuwait     | Non-venomous animal contact                     | 2 (1 to 4)       | 2 (1 to 4)      | 1.4% (-3.1% to 6%)        |
| 23 | Kuwait     | Other exposure to mechanical forces             | 24 (15 to 39)    | 25 (15 to 42)   | 3.5% (-4.2% to 11.1%)     |
| 24 | Kuwait     | Other road injuries                             | 3 (1 to 4)       | 2 (1 to 4)      | -14.7% (-25.3% to -2%)    |
| 25 | Kuwait     | Other transport injuries                        | 8 (6 to 10)      | 6 (5 to 8)      | -19.5% (-26.1% to -13.1%) |
| 26 | Kuwait     | Other unintentional injuries                    | 18 (11 to 30)    | 19 (12 to 32)   | 4.8% (-2.4% to 11.5%)     |
| 27 | Kuwait     | Pedestrian road injuries                        | 34 (27 to 42)    | 21 (17 to 27)   | -36.9% (-43.9% to -30.3%) |
| 28 | Kuwait     | Physical violence by firearm                    | 0 (0 to 1)       | 1 (0 to 1)      | 59.4% (39.5% to 84.4%)    |
| 29 | Kuwait     | Physical violence by other means                | 16 (11 to 22)    | 13 (9 to 18)    | -19.2% (-25.7% to -11.8%) |
| 30 | Kuwait     | Physical violence by sharp object               | 2 (1 to 3)       | 2 (1 to 3)      | -27.1% (-35.8% to -18.9%) |
| 31 | Kuwait     | Poisoning by carbon monoxide                    | 0 (0 to 0)       | 0 (0 to 0)      | 11.3% (-0.2% to 25%)      |
| 32 | Kuwait     | Poisoning by other means                        | 0 (0 to 0)       | 0 (0 to 0)      | -11% (-18.3% to -0.8%)    |
| 33 | Kuwait     | Pulmonary aspiration and foreign body in airway | 0 (0 to 1)       | 0 (0 to 1)      | -13.5% (-22.6% to -4.9%)  |
| 34 | Kuwait     | Self-harm by firearm                            | 0 (0 to 0)       | 0 (0 to 0)      | 21.2% (9.1% to 34.7%)     |
| 35 | Kuwait     | Self-harm by other specified means              | 1 (0 to 1)       | 1 (1 to 1)      | 13.3% (6.5% to 20.2%)     |
| 36 | Kuwait     | Unintentional firearm injuries                  | 2 (1 to 3)       | 2 (1 to 3)      | 10.2% (-0.9% to 21.8%)    |
| 37 | Kuwait     | Venomous animal contact                         | 1 (1 to 3)       | 1 (1 to 3)      | 2.3% (-3.7% to 7.8%)      |
| 38 | Kyrgyzstan | Adverse effects of medical treatment            | 0 (0 to 0)       | 0 (0 to 0)      | 0% (0% to 0%)             |
| 39 | Kyrgyzstan | Conflict and terrorism                          | 0 (0 to 0)       | 0 (0 to 0)      | NA                        |
| 40 | Kyrgyzstan | Cyclist road injuries                           | 21 (14 to 30)    | 20 (14 to 28)   | -5.7% (-14.9% to 3.8%)    |
| 41 | Kyrgyzstan | Drowning                                        | 1 (0 to 1)       | 1 (0 to 1)      | -14.2% (-25.1% to -3.3%)  |
| 42 | Kyrgyzstan | Environmental heat and cold exposure            | 4 (3 to 6)       | 4 (3 to 6)      | 5.9% (-4.6% to 16.6%)     |
| 43 | Kyrgyzstan | Executions and police conflict                  | 0 (0 to 0)       | 0 (0 to 0)      | NA                        |
| 44 | Kyrgyzstan | Exposure to forces of nature                    | 0 (0 to 0)       | 0 (0 to 0)      | NA                        |
| 45 |            |                                                 |                  |                 |                           |
| 46 |            |                                                 |                  |                 |                           |

|    |                                  |                                                 |                  |                 |                           |
|----|----------------------------------|-------------------------------------------------|------------------|-----------------|---------------------------|
| 1  |                                  |                                                 |                  |                 |                           |
| 2  | Kyrgyzstan                       | Falls                                           | 162 (125 to 210) | 112 (84 to 151) | -30.6% (-35.9% to -24.4%) |
| 3  | Kyrgyzstan                       | Fire, heat, and hot substances                  | 4 (3 to 7)       | 3 (2 to 5)      | -27.1% (-36.9% to -17.3%) |
| 4  | Kyrgyzstan                       | Foreign body in eyes                            | 0 (0 to 0)       | 0 (0 to 0)      | 1.1% (0.6% to 1.9%)       |
| 5  | Kyrgyzstan                       | Foreign body in other body part                 | 2 (1 to 4)       | 2 (1 to 4)      | 1.2% (-4.6% to 6.8%)      |
| 6  | Kyrgyzstan                       | Motor vehicle road injuries                     | 71 (55 to 88)    | 66 (51 to 82)   | -7% (-16.4% to 3.2%)      |
| 7  | Kyrgyzstan                       | Motorcyclist road injuries                      | 9 (7 to 12)      | 6 (4 to 7)      | -38.3% (-47.9% to -27.9%) |
| 8  | Kyrgyzstan                       | Non-venomous animal contact                     | 3 (2 to 5)       | 3 (2 to 5)      | 8.9% (3.2% to 15.4%)      |
| 9  | Kyrgyzstan                       | Other exposure to mechanical forces             | 49 (30 to 77)    | 48 (29 to 76)   | -1.7% (-7.2% to 3.1%)     |
| 10 | Kyrgyzstan                       | Other road injuries                             | 3 (2 to 5)       | 2 (1 to 4)      | -25.7% (-35.3% to -15.3%) |
| 11 | Kyrgyzstan                       | Other transport injuries                        | 5 (3 to 6)       | 5 (3 to 6)      | -2.4% (-7.7% to 3.2%)     |
| 12 | Kyrgyzstan                       | Other unintentional injuries                    | 25 (16 to 40)    | 20 (12 to 32)   | -22% (-28.9% to -15.3%)   |
| 13 | Kyrgyzstan                       | Pedestrian road injuries                        | 31 (24 to 39)    | 27 (21 to 35)   | -11.3% (-21.5% to 0%)     |
| 14 | Kyrgyzstan                       | Physical violence by firearm                    | 0 (0 to 0)       | 0 (0 to 0)      | -11.2% (-29.2% to 6.5%)   |
| 15 | Kyrgyzstan                       | Physical violence by other means                | 29 (21 to 40)    | 14 (10 to 21)   | -49.5% (-55.3% to -42.9%) |
| 16 | Kyrgyzstan                       | Physical violence by sharp object               | 5 (3 to 8)       | 2 (1 to 4)      | -52.3% (-61.2% to -43.3%) |
| 17 | Kyrgyzstan                       | Poisoning by carbon monoxide                    | 0 (0 to 0)       | 0 (0 to 0)      | -19.3% (-34.8% to -2.1%)  |
| 18 | Kyrgyzstan                       | Poisoning by other means                        | 0 (0 to 1)       | 0 (0 to 1)      | -19.7% (-30.3% to -8.5%)  |
| 19 | Kyrgyzstan                       | Pulmonary aspiration and foreign body in airway | 1 (1 to 2)       | 1 (1 to 2)      | -16.2% (-24.4% to -7.7%)  |
| 20 | Kyrgyzstan                       | Self-harm by firearm                            | 0 (0 to 1)       | 0 (0 to 0)      | -26% (-39.6% to -10.7%)   |
| 21 | Kyrgyzstan                       | Self-harm by other specified means              | 3 (2 to 4)       | 2 (2 to 4)      | -19.4% (-24.2% to -15%)   |
| 22 | Kyrgyzstan                       | Unintentional firearm injuries                  | 1 (0 to 2)       | 1 (0 to 1)      | -5.1% (-13.5% to 3.7%)    |
| 23 | Kyrgyzstan                       | Venomous animal contact                         | 3 (1 to 5)       | 3 (1 to 6)      | 3.8% (-2.4% to 9.5%)      |
| 24 | Lao People's Democratic Republic | Adverse effects of medical treatment            | 0 (0 to 0)       | 0 (0 to 0)      | 0% (0% to 0%)             |
| 25 | Lao People's Democratic Republic | Conflict and terrorism                          | 38 (10 to 107)   | 0 (0 to 0)      | NA                        |
| 26 | Lao People's Democratic Republic | Cyclist road injuries                           | 20 (14 to 29)    | 18 (13 to 26)   | -9.9% (-18.2% to -1.3%)   |
| 27 | Lao People's Democratic Republic | Drowning                                        | 1 (0 to 1)       | 0 (0 to 1)      | -46.7% (-49.9% to -41.9%) |
| 28 | Lao People's Democratic Republic | Environmental heat and cold exposure            | 1 (1 to 2)       | 1 (1 to 2)      | -6.7% (-12.4% to -0.6%)   |
| 29 | Lao People's Democratic Republic | Executions and police conflict                  | 0 (0 to 0)       | 0 (0 to 0)      | NA                        |
| 30 | Lao People's Democratic Republic | Exposure to forces of nature                    | 0 (0 to 0)       | 0 (0 to 0)      | NA                        |
| 31 | Lao People's Democratic Republic | Falls                                           | 45 (35 to 58)    | 60 (48 to 77)   | 34.5% (29.2% to 40.4%)    |
| 32 | Lao People's Democratic Republic | Fire, heat, and hot substances                  | 2 (1 to 3)       | 1 (1 to 2)      | -35.1% (-41.5% to -29.3%) |
| 33 | Lao People's Democratic Republic | Foreign body in eyes                            | 0 (0 to 0)       | 0 (0 to 0)      | 1.8% (1.2% to 2.6%)       |
| 34 | Lao People's Democratic Republic | Foreign body in other body part                 | 1 (0 to 2)       | 1 (0 to 2)      | -5.8% (-11.3% to -0.1%)   |
| 35 | Lao People's Democratic Republic | Motor vehicle road injuries                     | 28 (20 to 37)    | 24 (18 to 32)   | -12.5% (-20.1% to -4.4%)  |
| 36 | Lao People's Democratic Republic | Motorcyclist road injuries                      | 45 (36 to 57)    | 46 (37 to 58)   | 2.3% (-6.4% to 11.2%)     |
| 37 | Lao People's Democratic Republic | Non-venomous animal contact                     | 7 (4 to 12)      | 4 (3 to 7)      | -37.8% (-41.8% to -33.7%) |
| 38 | Lao People's Democratic Republic | Other exposure to mechanical forces             | 18 (11 to 30)    | 16 (9 to 25)    | -14.6% (-21.5% to -8.6%)  |
| 39 | Lao People's Democratic Republic | Other road injuries                             | 1 (1 to 2)       | 1 (1 to 2)      | 0.5% (-9.7% to 11.1%)     |
| 40 | Lao People's Democratic Republic | Other transport injuries                        | 6 (5 to 8)       | 4 (3 to 6)      | -26.3% (-32.2% to -19.9%) |
| 41 | Lao People's Democratic Republic | Other unintentional injuries                    | 10 (7 to 16)     | 9 (6 to 14)     | -15.2% (-20.8% to -9.1%)  |
| 42 | Lao People's Democratic Republic | Pedestrian road injuries                        | 21 (16 to 27)    | 15 (11 to 19)   | -28.6% (-33.9% to -22.8%) |
| 43 | Lao People's Democratic Republic | Physical violence by firearm                    | 0 (0 to 1)       | 0 (0 to 0)      | -24.4% (-31.7% to -15.6%) |
| 44 | Lao People's Democratic Republic | Physical violence by other means                | 34 (24 to 49)    | 26 (18 to 37)   | -24.1% (-29.1% to -18.8%) |
| 45 |                                  |                                                 |                  |                 |                           |
| 46 |                                  |                                                 |                  |                 |                           |

|    |                                  |                                                 |                  |                  |                           |
|----|----------------------------------|-------------------------------------------------|------------------|------------------|---------------------------|
| 1  | Lao People's Democratic Republic | Physical violence by sharp object               | 7 (4 to 11)      | 6 (4 to 9)       | -20.5% (-28.7% to -11.5%) |
| 2  | Lao People's Democratic Republic | Poisoning by carbon monoxide                    | 0 (0 to 0)       | 0 (0 to 0)       | 16.6% (-2.7% to 38.6%)    |
| 3  | Lao People's Democratic Republic | Poisoning by other means                        | 0 (0 to 0)       | 0 (0 to 0)       | -28.3% (-37.2% to -19.1%) |
| 4  | Lao People's Democratic Republic | Pulmonary aspiration and foreign body in airway | 0 (0 to 0)       | 0 (0 to 0)       | -39.6% (-47.6% to -32.1%) |
| 5  | Lao People's Democratic Republic | Self-harm by firearm                            | 0 (0 to 0)       | 0 (0 to 0)       | -12.4% (-28.4% to 7%)     |
| 6  | Lao People's Democratic Republic | Self-harm by other specified means              | 2 (1 to 3)       | 1 (1 to 2)       | -28% (-32.2% to -23.7%)   |
| 7  | Lao People's Democratic Republic | Unintentional firearm injuries                  | 2 (1 to 3)       | 2 (1 to 3)       | -17.4% (-26.9% to -8.4%)  |
| 8  | Lao People's Democratic Republic | Venomous animal contact                         | 2 (0 to 3)       | 1 (0 to 2)       | -33.9% (-41.4% to -27.3%) |
| 9  | Latvia                           | Adverse effects of medical treatment            | 0 (0 to 0)       | 0 (0 to 0)       | 0% (0% to 0%)             |
| 10 | Latvia                           | Conflict and terrorism                          | 0 (0 to 0)       | 0 (0 to 0)       | NA                        |
| 11 | Latvia                           | Cyclist road injuries                           | 78 (56 to 106)   | 46 (33 to 62)    | -41.3% (-49.7% to -31.8%) |
| 12 | Latvia                           | Drowning                                        | 1 (1 to 2)       | 1 (1 to 2)       | -17% (-25.5% to -8.3%)    |
| 13 | Latvia                           | Environmental heat and cold exposure            | 10 (7 to 14)     | 11 (8 to 15)     | 15.6% (5% to 28.7%)       |
| 14 | Latvia                           | Executions and police conflict                  | 0 (0 to 0)       | 0 (0 to 0)       | NA                        |
| 15 | Latvia                           | Exposure to forces of nature                    | 0 (0 to 0)       | 0 (0 to 0)       | NA                        |
| 16 | Latvia                           | Falls                                           | 407 (322 to 516) | 266 (208 to 341) | -34.6% (-38.4% to -30.9%) |
| 17 | Latvia                           | Fire, heat, and hot substances                  | 7 (4 to 11)      | 4 (3 to 7)       | -40% (-45.5% to -33.8%)   |
| 18 | Latvia                           | Foreign body in eyes                            | 0 (0 to 0)       | 0 (0 to 0)       | 1.1% (0.6% to 1.9%)       |
| 19 | Latvia                           | Foreign body in other body part                 | 2 (1 to 4)       | 2 (1 to 4)       | 2.2% (-3.6% to 8.5%)      |
| 20 | Latvia                           | Motor vehicle road injuries                     | 199 (156 to 248) | 98 (76 to 123)   | -50.6% (-57.9% to -41.7%) |
| 21 | Latvia                           | Motorcyclist road injuries                      | 24 (18 to 31)    | 12 (9 to 16)     | -48.8% (-58.7% to -37.6%) |
| 22 | Latvia                           | Non-venomous animal contact                     | 4 (2 to 7)       | 4 (2 to 6)       | -9.4% (-15.1% to -4.2%)   |
| 23 | Latvia                           | Other exposure to mechanical forces             | 109 (69 to 170)  | 84 (52 to 131)   | -23.3% (-31.3% to -14.6%) |
| 24 | Latvia                           | Other road injuries                             | 2 (1 to 4)       | 2 (1 to 3)       | -15.1% (-26.9% to -1.5%)  |
| 25 | Latvia                           | Other transport injuries                        | 10 (8 to 13)     | 6 (5 to 8)       | -39.1% (-46% to -32.4%)   |
| 26 | Latvia                           | Other unintentional injuries                    | 27 (17 to 44)    | 24 (15 to 40)    | -10.5% (-18.5% to -2.7%)  |
| 27 | Latvia                           | Pedestrian road injuries                        | 97 (75 to 122)   | 36 (27 to 46)    | -63% (-68.4% to -57.4%)   |
| 28 | Latvia                           | Physical violence by firearm                    | 0 (0 to 1)       | 0 (0 to 1)       | -17.5% (-36.6% to 5.1%)   |
| 29 | Latvia                           | Physical violence by other means                | 44 (32 to 61)    | 28 (20 to 39)    | -37.1% (-43.6% to -30.1%) |
| 30 | Latvia                           | Physical violence by sharp object               | 6 (4 to 9)       | 3 (2 to 5)       | -45.7% (-54.8% to -36.3%) |
| 31 | Latvia                           | Poisoning by carbon monoxide                    | 0 (0 to 0)       | 0 (0 to 0)       | -3.3% (-21.1% to 14.7%)   |
| 32 | Latvia                           | Poisoning by other means                        | 0 (0 to 1)       | 0 (0 to 1)       | 2.2% (-11.8% to 15.4%)    |
| 33 | Latvia                           | Pulmonary aspiration and foreign body in airway | 1 (1 to 2)       | 1 (0 to 1)       | -21.9% (-28.8% to -14.3%) |
| 34 | Latvia                           | Self-harm by firearm                            | 2 (1 to 3)       | 1 (1 to 2)       | -40.8% (-48.9% to -31.9%) |
| 35 | Latvia                           | Self-harm by other specified means              | 5 (3 to 8)       | 4 (2 to 6)       | -31.9% (-36.4% to -26.7%) |
| 36 | Latvia                           | Unintentional firearm injuries                  | 1 (1 to 2)       | 1 (1 to 2)       | -1.6% (-15.6% to 13.6%)   |
| 37 | Latvia                           | Venomous animal contact                         | 3 (1 to 6)       | 3 (1 to 5)       | -8.5% (-14.6% to -2.5%)   |
| 38 | Lebanon                          | Adverse effects of medical treatment            | 0 (0 to 0)       | 0 (0 to 0)       | 0% (0% to 0%)             |
| 39 | Lebanon                          | Conflict and terrorism                          | 136 (51 to 324)  | 1 (0 to 2)       | NA                        |
| 40 | Lebanon                          | Cyclist road injuries                           | 12 (8 to 17)     | 12 (8 to 17)     | 0% (-7.7% to 9.5%)        |
| 41 | Lebanon                          | Drowning                                        | 0 (0 to 0)       | 0 (0 to 1)       | 115.2% (89.4% to 143.2%)  |
| 42 | Lebanon                          | Environmental heat and cold exposure            | 3 (2 to 4)       | 3 (2 to 4)       | 3.6% (-1.9% to 7.7%)      |
| 43 | Lebanon                          | Executions and police conflict                  | 0 (0 to 0)       | 0 (0 to 0)       | NA                        |



|    |         |                                                 |                |                |                           |
|----|---------|-------------------------------------------------|----------------|----------------|---------------------------|
| 1  |         |                                                 |                |                |                           |
| 2  | Lebanon | Exposure to forces of nature                    | 0 (0 to 0)     | 0 (0 to 0)     | NA                        |
| 3  | Lebanon | Falls                                           | 64 (49 to 86)  | 98 (75 to 132) | 53.7% (47.8% to 59.8%)    |
| 4  | Lebanon | Fire, heat, and hot substances                  | 1 (1 to 2)     | 1 (0 to 1)     | -23.7% (-30.2% to -17%)   |
| 5  | Lebanon | Foreign body in eyes                            | 0 (0 to 0)     | 0 (0 to 0)     | -0.7% (-1.6% to -0.2%)    |
| 6  | Lebanon | Foreign body in other body part                 | 1 (1 to 3)     | 1 (1 to 3)     | -0.8% (-5.8% to 4.6%)     |
| 7  | Lebanon | Motor vehicle road injuries                     | 27 (21 to 35)  | 21 (16 to 27)  | -21.6% (-27.7% to -15%)   |
| 8  | Lebanon | Motorcyclist road injuries                      | 8 (6 to 11)    | 8 (6 to 10)    | -6.1% (-14.3% to 3.8%)    |
| 9  | Lebanon | Non-venomous animal contact                     | 3 (2 to 6)     | 3 (2 to 6)     | -3.4% (-8.9% to 2.1%)     |
| 10 | Lebanon | Other exposure to mechanical forces             | 27 (16 to 44)  | 24 (14 to 40)  | -10.2% (-16.1% to -5%)    |
| 11 | Lebanon | Other road injuries                             | 2 (1 to 3)     | 2 (1 to 3)     | 2.4% (-6.2% to 12.5%)     |
| 12 | Lebanon | Other transport injuries                        | 5 (4 to 7)     | 5 (4 to 8)     | 0.2% (-4.8% to 5.7%)      |
| 13 | Lebanon | Other unintentional injuries                    | 19 (12 to 31)  | 17 (11 to 29)  | -6.7% (-11.7% to -1.1%)   |
| 14 | Lebanon | Pedestrian road injuries                        | 14 (11 to 19)  | 12 (9 to 15)   | -17.8% (-24.3% to -10.7%) |
| 15 | Lebanon | Physical violence by firearm                    | 1 (1 to 2)     | 1 (1 to 2)     | 8.6% (-10.8% to 33.3%)    |
| 16 | Lebanon | Physical violence by other means                | 77 (57 to 106) | 28 (20 to 40)  | -63.8% (-69.3% to -57.2%) |
| 17 | Lebanon | Physical violence by sharp object               | 10 (7 to 16)   | 2 (2 to 4)     | -76.1% (-80.3% to -71.1%) |
| 18 | Lebanon | Poisoning by carbon monoxide                    | 0 (0 to 0)     | 0 (0 to 0)     | 29.1% (15.3% to 43.4%)    |
| 19 | Lebanon | Poisoning by other means                        | 0 (0 to 0)     | 0 (0 to 0)     | -20.5% (-28.8% to -13.3%) |
| 20 | Lebanon | Pulmonary aspiration and foreign body in airway | 0 (0 to 1)     | 0 (0 to 1)     | -14.4% (-22.4% to -5.6%)  |
| 21 | Lebanon | Self-harm by firearm                            | 0 (0 to 0)     | 0 (0 to 0)     | 42.5% (28.5% to 58.9%)    |
| 22 | Lebanon | Self-harm by other specified means              | 1 (1 to 2)     | 1 (1 to 2)     | 14.9% (9.1% to 22%)       |
| 23 | Lebanon | Unintentional firearm injuries                  | 2 (1 to 3)     | 2 (1 to 3)     | -1.3% (-9.3% to 6.9%)     |
| 24 | Lebanon | Venomous animal contact                         | 2 (1 to 4)     | 2 (1 to 4)     | 0.1% (-5.8% to 6.9%)      |
| 25 | Lesotho | Adverse effects of medical treatment            | 0 (0 to 0)     | 0 (0 to 0)     | 0% (0% to 0%)             |
| 26 | Lesotho | Conflict and terrorism                          | 0 (0 to 0)     | 0 (0 to 0)     | NA                        |
| 27 | Lesotho | Cyclist road injuries                           | 9 (5 to 14)    | 13 (8 to 20)   | 48.8% (36.5% to 63.1%)    |
| 28 | Lesotho | Drowning                                        | 0 (0 to 0)     | 0 (0 to 0)     | 1.2% (-8.3% to 10.3%)     |
| 29 | Lesotho | Environmental heat and cold exposure            | 0 (0 to 1)     | 0 (0 to 1)     | 5% (-0.9% to 11%)         |
| 30 | Lesotho | Executions and police conflict                  | 0 (0 to 0)     | 0 (0 to 0)     | NA                        |
| 31 | Lesotho | Exposure to forces of nature                    | 5 (3 to 9)     | 0 (0 to 0)     | NA                        |
| 32 | Lesotho | Falls                                           | 20 (13 to 31)  | 24 (15 to 37)  | 19.9% (15% to 25.8%)      |
| 33 | Lesotho | Fire, heat, and hot substances                  | 0 (0 to 0)     | 0 (0 to 0)     | 21.5% (12.9% to 31.7%)    |
| 34 | Lesotho | Foreign body in eyes                            | 0 (0 to 0)     | 0 (0 to 0)     | -0.3% (-0.8% to 0.3%)     |
| 35 | Lesotho | Foreign body in other body part                 | 4 (2 to 9)     | 4 (2 to 8)     | -5.8% (-11.4% to -0.7%)   |
| 36 | Lesotho | Motor vehicle road injuries                     | 23 (15 to 33)  | 37 (25 to 53)  | 63.7% (50.4% to 78.2%)    |
| 37 | Lesotho | Motorcyclist road injuries                      | 6 (4 to 9)     | 12 (8 to 17)   | 91.8% (71.6% to 116.8%)   |
| 38 | Lesotho | Non-venomous animal contact                     | 4 (2 to 8)     | 4 (2 to 8)     | -4.7% (-9.8% to 1.1%)     |
| 39 | Lesotho | Other exposure to mechanical forces             | 28 (14 to 50)  | 28 (14 to 50)  | -0.3% (-5.9% to 5.3%)     |
| 40 | Lesotho | Other road injuries                             | 1 (1 to 2)     | 1 (1 to 3)     | 29.7% (18.7% to 41.4%)    |
| 41 | Lesotho | Other transport injuries                        | 4 (3 to 6)     | 4 (3 to 6)     | 2.4% (-3.7% to 9.5%)      |
| 42 | Lesotho | Other unintentional injuries                    | 3 (1 to 5)     | 2 (1 to 4)     | -4% (-9.4% to 2%)         |
| 43 | Lesotho | Pedestrian road injuries                        | 33 (25 to 43)  | 50 (36 to 65)  | 49.5% (38.4% to 59.9%)    |
| 44 | Lesotho | Physical violence by firearm                    | 0 (0 to 1)     | 1 (0 to 1)     | 22.6% (10% to 34.6%)      |
| 45 |         |                                                 |                |                |                           |
| 46 |         |                                                 |                |                |                           |

|    |         |                                                 |                   |                |                           |
|----|---------|-------------------------------------------------|-------------------|----------------|---------------------------|
| 1  |         |                                                 |                   |                |                           |
| 2  | Lesotho | Physical violence by other means                | 16 (11 to 24)     | 22 (14 to 33)  | 37.3% (26.8% to 49.2%)    |
| 3  | Lesotho | Physical violence by sharp object               | 5 (3 to 9)        | 7 (4 to 12)    | 36.5% (21.8% to 51.1%)    |
| 4  | Lesotho | Poisoning by carbon monoxide                    | 0 (0 to 0)        | 0 (0 to 0)     | 5.5% (-3.8% to 15.2%)     |
| 5  | Lesotho | Poisoning by other means                        | 0 (0 to 0)        | 0 (0 to 0)     | 0.2% (-7.3% to 8.7%)      |
| 6  | Lesotho | Pulmonary aspiration and foreign body in airway | 0 (0 to 0)        | 0 (0 to 0)     | -1.6% (-9.5% to 8.4%)     |
| 7  | Lesotho | Self-harm by firearm                            | 0 (0 to 0)        | 0 (0 to 0)     | 101.4% (82.4% to 124.1%)  |
| 8  | Lesotho | Self-harm by other specified means              | 0 (0 to 0)        | 0 (0 to 1)     | 68.4% (56.4% to 82.5%)    |
| 9  | Lesotho | Unintentional firearm injuries                  | 1 (0 to 1)        | 1 (0 to 1)     | -9.8% (-17.7% to -0.8%)   |
| 10 | Lesotho | Venomous animal contact                         | 0 (0 to 1)        | 0 (0 to 1)     | -14.3% (-20.6% to -7.6%)  |
| 11 | Liberia | Adverse effects of medical treatment            | 0 (0 to 0)        | 0 (0 to 0)     | 0% (0% to 0%)             |
| 12 | Liberia | Conflict and terrorism                          | 792 (244 to 1989) | 0 (0 to 0)     | NA                        |
| 13 | Liberia | Cyclist road injuries                           | 24 (15 to 35)     | 26 (17 to 38)  | 6.3% (-0.6% to 13.9%)     |
| 14 | Liberia | Drowning                                        | 0 (0 to 0)        | 0 (0 to 0)     | -14.4% (-22.2% to -6.9%)  |
| 15 | Liberia | Environmental heat and cold exposure            | 0 (0 to 1)        | 0 (0 to 1)     | 3.9% (-3.2% to 11.9%)     |
| 16 | Liberia | Executions and police conflict                  | 0 (0 to 0)        | 0 (0 to 0)     | NA                        |
| 17 | Liberia | Exposure to forces of nature                    | 0 (0 to 0)        | 0 (0 to 0)     | NA                        |
| 18 | Liberia | Falls                                           | 17 (11 to 25)     | 19 (12 to 29)  | 15.6% (10.5% to 21.1%)    |
| 19 | Liberia | Fire, heat, and hot substances                  | 0 (0 to 0)        | 0 (0 to 0)     | -8.9% (-15.6% to -2.3%)   |
| 20 | Liberia | Foreign body in eyes                            | 0 (0 to 0)        | 0 (0 to 0)     | 0.1% (-0.3% to 0.9%)      |
| 21 | Liberia | Foreign body in other body part                 | 4 (2 to 8)        | 4 (1 to 7)     | -4.5% (-9.8% to 0.8%)     |
| 22 | Liberia | Motor vehicle road injuries                     | 42 (29 to 59)     | 41 (28 to 57)  | -3.5% (-10.2% to 3.5%)    |
| 23 | Liberia | Motorcyclist road injuries                      | 20 (14 to 27)     | 19 (14 to 27)  | -0.5% (-7.6% to 7%)       |
| 24 | Liberia | Non-venomous animal contact                     | 3 (1 to 6)        | 3 (1 to 6)     | 5.9% (1.2% to 11%)        |
| 25 | Liberia | Other exposure to mechanical forces             | 24 (12 to 45)     | 22 (11 to 40)  | -10.4% (-17.1% to -4.5%)  |
| 26 | Liberia | Other road injuries                             | 2 (1 to 3)        | 2 (1 to 4)     | 8.7% (-0.3% to 18.4%)     |
| 27 | Liberia | Other transport injuries                        | 3 (2 to 4)        | 3 (2 to 4)     | 1.2% (-7.6% to 9.8%)      |
| 28 | Liberia | Other unintentional injuries                    | 3 (2 to 5)        | 2 (1 to 4)     | -14.8% (-21.5% to -8.9%)  |
| 29 | Liberia | Pedestrian road injuries                        | 44 (32 to 58)     | 42 (30 to 56)  | -5.8% (-11.8% to 0.5%)    |
| 30 | Liberia | Physical violence by firearm                    | 0 (0 to 0)        | 0 (0 to 0)     | 1.9% (-12.5% to 18.8%)    |
| 31 | Liberia | Physical violence by other means                | 6 (4 to 9)        | 4 (3 to 7)     | -26.6% (-32.6% to -20.1%) |
| 32 | Liberia | Physical violence by sharp object               | 2 (1 to 3)        | 1 (1 to 2)     | -23% (-29.4% to -15.4%)   |
| 33 | Liberia | Poisoning by carbon monoxide                    | 0 (0 to 0)        | 0 (0 to 0)     | 8.9% (-4% to 24.6%)       |
| 34 | Liberia | Poisoning by other means                        | 0 (0 to 0)        | 0 (0 to 0)     | -17.3% (-25.3% to -9.1%)  |
| 35 | Liberia | Pulmonary aspiration and foreign body in airway | 0 (0 to 0)        | 0 (0 to 0)     | -17.5% (-27.9% to -7.5%)  |
| 36 | Liberia | Self-harm by firearm                            | 0 (0 to 0)        | 0 (0 to 0)     | 13.8% (6.6% to 22%)       |
| 37 | Liberia | Self-harm by other specified means              | 0 (0 to 0)        | 0 (0 to 0)     | 10.8% (4.9% to 17.6%)     |
| 38 | Liberia | Unintentional firearm injuries                  | 1 (0 to 2)        | 1 (0 to 2)     | -18.9% (-26.5% to -10.8%) |
| 39 | Liberia | Venomous animal contact                         | 0 (0 to 1)        | 0 (0 to 1)     | 5.8% (-1.7% to 13.7%)     |
| 40 | Libya   | Adverse effects of medical treatment            | 0 (0 to 0)        | 0 (0 to 0)     | 0% (0% to 0%)             |
| 41 | Libya   | Conflict and terrorism                          | 0 (0 to 0)        | 76 (31 to 175) | NA                        |
| 42 | Libya   | Cyclist road injuries                           | 17 (11 to 25)     | 16 (11 to 23)  | -6.3% (-15.4% to 3.7%)    |
| 43 | Libya   | Drowning                                        | 0 (0 to 0)        | 0 (0 to 0)     | 16.6% (2% to 35.5%)       |
| 44 | Libya   | Environmental heat and cold exposure            | 3 (2 to 4)        | 3 (2 to 4)     | 0.4% (-4.4% to 4.8%)      |
| 45 |         |                                                 |                   |                |                           |
| 46 |         |                                                 |                   |                |                           |

|    |           |                                                 |                  |                  |                           |
|----|-----------|-------------------------------------------------|------------------|------------------|---------------------------|
| 1  |           |                                                 |                  |                  |                           |
| 2  | Libya     | Executions and police conflict                  | 0 (0 to 0)       | 2 (1 to 4)       | NA                        |
| 3  | Libya     | Exposure to forces of nature                    | 0 (0 to 0)       | 0 (0 to 0)       | NA                        |
| 4  | Libya     | Falls                                           | 81 (63 to 105)   | 95 (73 to 125)   | 18% (13.4% to 22.8%)      |
| 5  | Libya     | Fire, heat, and hot substances                  | 1 (1 to 2)       | 1 (0 to 1)       | -27.3% (-32.7% to -21.6%) |
| 6  | Libya     | Foreign body in eyes                            | 0 (0 to 0)       | 0 (0 to 0)       | -1.4% (-2.6% to -0.5%)    |
| 7  | Libya     | Foreign body in other body part                 | 1 (1 to 3)       | 1 (1 to 3)       | -0.9% (-5.1% to 4.7%)     |
| 8  | Libya     | Motor vehicle road injuries                     | 66 (52 to 83)    | 48 (38 to 61)    | -27% (-32.4% to -21.3%)   |
| 9  | Libya     | Motorcyclist road injuries                      | 12 (9 to 16)     | 10 (8 to 14)     | -11.8% (-21.3% to -1.8%)  |
| 10 | Libya     | Non-venomous animal contact                     | 3 (1 to 5)       | 3 (2 to 5)       | 18.2% (12.7% to 23.6%)    |
| 11 | Libya     | Other exposure to mechanical forces             | 29 (18 to 45)    | 24 (14 to 38)    | -16% (-21.7% to -11.1%)   |
| 12 | Libya     | Other road injuries                             | 2 (1 to 4)       | 2 (1 to 3)       | -2.7% (-12.2% to 7.9%)    |
| 13 | Libya     | Other transport injuries                        | 5 (4 to 7)       | 5 (4 to 7)       | -5.3% (-11.5% to 0.7%)    |
| 14 | Libya     | Other unintentional injuries                    | 18 (12 to 29)    | 16 (10 to 27)    | -10.2% (-15.7% to -4.4%)  |
| 15 | Libya     | Pedestrian road injuries                        | 36 (27 to 45)    | 27 (20 to 33)    | -25.2% (-31.4% to -19%)   |
| 16 | Libya     | Physical violence by firearm                    | 0 (0 to 0)       | 2 (1 to 2)       | 509.9% (398.5% to 654.9%) |
| 17 | Libya     | Physical violence by other means                | 14 (10 to 20)    | 43 (32 to 59)    | 213.6% (165.9% to 271.4%) |
| 18 | Libya     | Physical violence by sharp object               | 2 (1 to 3)       | 5 (3 to 7)       | 130.9% (93.1% to 176.2%)  |
| 19 | Libya     | Poisoning by carbon monoxide                    | 0 (0 to 0)       | 0 (0 to 0)       | 14.7% (3.3% to 26.1%)     |
| 20 | Libya     | Poisoning by other means                        | 0 (0 to 0)       | 0 (0 to 0)       | -21.6% (-27.9% to -15.2%) |
| 21 | Libya     | Pulmonary aspiration and foreign body in airway | 0 (0 to 1)       | 0 (0 to 1)       | -5.6% (-13.8% to 2.9%)    |
| 22 | Libya     | Self-harm by firearm                            | 0 (0 to 0)       | 0 (0 to 0)       | 24.7% (10.8% to 40.3%)    |
| 23 | Libya     | Self-harm by other specified means              | 1 (1 to 2)       | 1 (1 to 2)       | 12.6% (7.2% to 18.8%)     |
| 24 | Libya     | Unintentional firearm injuries                  | 2 (1 to 3)       | 1 (1 to 2)       | -9% (-17.3% to -0.1%)     |
| 25 | Libya     | Venomous animal contact                         | 2 (1 to 3)       | 2 (1 to 4)       | 18.6% (11.9% to 25.6%)    |
| 26 | Lithuania | Adverse effects of medical treatment            | 0 (0 to 0)       | 0 (0 to 0)       | 0% (0% to 0%)             |
| 27 | Lithuania | Conflict and terrorism                          | 0 (0 to 0)       | 0 (0 to 0)       | NA                        |
| 28 | Lithuania | Cyclist road injuries                           | 85 (63 to 113)   | 53 (38 to 71)    | -38.2% (-46.7% to -30%)   |
| 29 | Lithuania | Drowning                                        | 1 (1 to 2)       | 1 (0 to 1)       | -23.4% (-31.1% to -15.3%) |
| 30 | Lithuania | Environmental heat and cold exposure            | 12 (9 to 17)     | 13 (9 to 17)     | 4% (-2.8% to 13.1%)       |
| 31 | Lithuania | Executions and police conflict                  | 0 (0 to 0)       | 0 (0 to 0)       | NA                        |
| 32 | Lithuania | Exposure to forces of nature                    | 0 (0 to 0)       | 0 (0 to 0)       | NA                        |
| 33 | Lithuania | Falls                                           | 359 (283 to 459) | 305 (242 to 392) | -15% (-19.3% to -10.4%)   |
| 34 | Lithuania | Fire, heat, and hot substances                  | 5 (3 to 7)       | 3 (2 to 6)       | -25.1% (-33.3% to -16.9%) |
| 35 | Lithuania | Foreign body in eyes                            | 0 (0 to 0)       | 0 (0 to 0)       | 0.6% (0.3% to 1.1%)       |
| 36 | Lithuania | Foreign body in other body part                 | 2 (1 to 4)       | 2 (1 to 4)       | 2.2% (-3.6% to 7.6%)      |
| 37 | Lithuania | Motor vehicle road injuries                     | 178 (137 to 225) | 105 (82 to 132)  | -40.9% (-49.4% to -32.4%) |
| 38 | Lithuania | Motorcyclist road injuries                      | 15 (11 to 20)    | 13 (9 to 17)     | -17.7% (-31.4% to -5.3%)  |
| 39 | Lithuania | Non-venomous animal contact                     | 4 (2 to 7)       | 4 (2 to 7)       | -11.9% (-16.8% to -7%)    |
| 40 | Lithuania | Other exposure to mechanical forces             | 91 (56 to 143)   | 82 (50 to 129)   | -10% (-17.5% to -2.7%)    |
| 41 | Lithuania | Other road injuries                             | 4 (2 to 6)       | 2 (1 to 4)       | -40.6% (-50.1% to -30.3%) |
| 42 | Lithuania | Other transport injuries                        | 7 (5 to 9)       | 6 (4 to 8)       | -14.4% (-21.6% to -7.1%)  |
| 43 | Lithuania | Other unintentional injuries                    | 32 (20 to 51)    | 25 (15 to 42)    | -21.4% (-28.8% to -14.2%) |
| 44 | Lithuania | Pedestrian road injuries                        | 108 (84 to 134)  | 40 (31 to 51)    | -62.5% (-67.2% to -57.5%) |
| 45 |           |                                                 |                  |                  |                           |
| 46 |           |                                                 |                  |                  |                           |

|    |            |                                                 |                  |                  |                           |
|----|------------|-------------------------------------------------|------------------|------------------|---------------------------|
| 1  |            |                                                 |                  |                  |                           |
| 2  | Lithuania  | Physical violence by firearm                    | 0 (0 to 1)       | 0 (0 to 1)       | -31.4% (-48.5% to -11%)   |
| 3  | Lithuania  | Physical violence by other means                | 35 (26 to 50)    | 27 (19 to 37)    | -25.1% (-33.1% to -16.8%) |
| 4  | Lithuania  | Physical violence by sharp object               | 5 (3 to 8)       | 3 (2 to 5)       | -40.5% (-50.7% to -31.4%) |
| 5  | Lithuania  | Poisoning by carbon monoxide                    | 0 (0 to 0)       | 0 (0 to 0)       | -1.1% (-12.5% to 10.7%)   |
| 6  | Lithuania  | Poisoning by other means                        | 0 (0 to 1)       | 0 (0 to 1)       | -8% (-17.5% to 1.4%)      |
| 7  | Lithuania  | Pulmonary aspiration and foreign body in airway | 1 (1 to 2)       | 1 (1 to 2)       | -18.7% (-25.7% to -11.9%) |
| 8  | Lithuania  | Self-harm by firearm                            | 1 (1 to 2)       | 1 (1 to 2)       | -23.5% (-36.4% to -8.6%)  |
| 9  | Lithuania  | Self-harm by other specified means              | 7 (5 to 11)      | 6 (4 to 10)      | -8.4% (-13.9% to -2.6%)   |
| 10 | Lithuania  | Unintentional firearm injuries                  | 1 (1 to 2)       | 1 (1 to 2)       | -10.4% (-22.2% to 1.6%)   |
| 11 | Lithuania  | Venomous animal contact                         | 3 (1 to 6)       | 3 (1 to 6)       | -7.1% (-12.5% to -1.4%)   |
| 12 | Luxembourg | Adverse effects of medical treatment            | 0 (0 to 0)       | 0 (0 to 0)       | 0% (0% to 0%)             |
| 13 | Luxembourg | Conflict and terrorism                          | 0 (0 to 0)       | 0 (0 to 0)       | NA                        |
| 14 | Luxembourg | Cyclist road injuries                           | 26 (18 to 35)    | 20 (14 to 27)    | -22% (-32.7% to -10.3%)   |
| 15 | Luxembourg | Drowning                                        | 0 (0 to 0)       | 0 (0 to 0)       | 77.3% (61.4% to 97%)      |
| 16 | Luxembourg | Environmental heat and cold exposure            | 2 (1 to 3)       | 2 (1 to 3)       | 0.2% (-4.8% to 4.3%)      |
| 17 | Luxembourg | Executions and police conflict                  | 0 (0 to 0)       | 0 (0 to 0)       | NA                        |
| 18 | Luxembourg | Exposure to forces of nature                    | 0 (0 to 0)       | 0 (0 to 0)       | NA                        |
| 19 | Luxembourg | Falls                                           | 290 (228 to 366) | 304 (239 to 386) | 5% (-0.2% to 10.4%)       |
| 20 | Luxembourg | Fire, heat, and hot substances                  | 2 (1 to 4)       | 2 (1 to 4)       | -2.7% (-7.9% to 3%)       |
| 21 | Luxembourg | Foreign body in eyes                            | 0 (0 to 0)       | 0 (0 to 0)       | 0.7% (0.2% to 1.7%)       |
| 22 | Luxembourg | Foreign body in other body part                 | 2 (1 to 3)       | 2 (1 to 3)       | 1.5% (-3.1% to 6.4%)      |
| 23 | Luxembourg | Motor vehicle road injuries                     | 56 (44 to 71)    | 24 (18 to 32)    | -56.9% (-62.8% to -50.4%) |
| 24 | Luxembourg | Motorcyclist road injuries                      | 11 (8 to 15)     | 10 (7 to 13)     | -13% (-27.3% to 3.1%)     |
| 25 | Luxembourg | Non-venomous animal contact                     | 2 (1 to 4)       | 2 (1 to 3)       | -19.2% (-23.2% to -15.1%) |
| 26 | Luxembourg | Other exposure to mechanical forces             | 56 (35 to 88)    | 44 (27 to 71)    | -21.1% (-28.4% to -13.7%) |
| 27 | Luxembourg | Other road injuries                             | 1 (1 to 2)       | 1 (1 to 2)       | -7.5% (-20.4% to 8.1%)    |
| 28 | Luxembourg | Other transport injuries                        | 4 (3 to 6)       | 4 (3 to 6)       | -0.6% (-6.5% to 5.3%)     |
| 29 | Luxembourg | Other unintentional injuries                    | 45 (30 to 69)    | 25 (16 to 39)    | -44.9% (-49.7% to -40%)   |
| 30 | Luxembourg | Pedestrian road injuries                        | 17 (13 to 22)    | 7 (5 to 9)       | -61.4% (-67.5% to -53.9%) |
| 31 | Luxembourg | Physical violence by firearm                    | 0 (0 to 1)       | 1 (0 to 1)       | 57.8% (37.9% to 79.7%)    |
| 32 | Luxembourg | Physical violence by other means                | 19 (13 to 27)    | 15 (10 to 22)    | -19.6% (-26.2% to -12.2%) |
| 33 | Luxembourg | Physical violence by sharp object               | 2 (1 to 3)       | 1 (1 to 2)       | -17.2% (-29.4% to -6.4%)  |
| 34 | Luxembourg | Poisoning by carbon monoxide                    | 0 (0 to 0)       | 0 (0 to 0)       | 4.8% (-3.5% to 13.7%)     |
| 35 | Luxembourg | Poisoning by other means                        | 0 (0 to 0)       | 0 (0 to 0)       | -8.3% (-14.6% to -2.8%)   |
| 36 | Luxembourg | Pulmonary aspiration and foreign body in airway | 1 (1 to 2)       | 1 (0 to 1)       | -22.8% (-30.6% to -16.3%) |
| 37 | Luxembourg | Self-harm by firearm                            | 1 (0 to 1)       | 1 (0 to 1)       | -15% (-26.9% to -0.9%)    |
| 38 | Luxembourg | Self-harm by other specified means              | 4 (2 to 6)       | 2 (1 to 4)       | -36.8% (-41.2% to -32.8%) |
| 39 | Luxembourg | Unintentional firearm injuries                  | 1 (1 to 2)       | 1 (1 to 2)       | -0.7% (-10.7% to 10.4%)   |
| 40 | Luxembourg | Venomous animal contact                         | 1 (0 to 2)       | 1 (0 to 2)       | -18.1% (-23.3% to -13%)   |
| 41 | Madagascar | Adverse effects of medical treatment            | 0 (0 to 0)       | 0 (0 to 0)       | 0% (0% to 0%)             |
| 42 | Madagascar | Conflict and terrorism                          | 0 (0 to 0)       | 2 (1 to 6)       | NA                        |
| 43 | Madagascar | Cyclist road injuries                           | 34 (22 to 51)    | 32 (21 to 47)    | -5.8% (-13.1% to 1.9%)    |
| 44 | Madagascar | Drowning                                        | 0 (0 to 0)       | 0 (0 to 0)       | -13.6% (-21.9% to -4.5%)  |
| 45 |            |                                                 |                  |                  |                           |
| 46 |            |                                                 |                  |                  |                           |

|    |            |                                                 |               |               |                           |
|----|------------|-------------------------------------------------|---------------|---------------|---------------------------|
| 1  |            |                                                 |               |               |                           |
| 2  | Madagascar | Environmental heat and cold exposure            | 0 (0 to 1)    | 0 (0 to 1)    | -3.9% (-10.9% to 3.4%)    |
| 3  | Madagascar | Executions and police conflict                  | 0 (0 to 0)    | 0 (0 to 0)    | NA                        |
| 4  | Madagascar | Exposure to forces of nature                    | 0 (0 to 0)    | 0 (0 to 0)    | NA                        |
| 5  | Madagascar | Falls                                           | 23 (14 to 35) | 25 (16 to 40) | 11.2% (5.5% to 17%)       |
| 6  | Madagascar | Fire, heat, and hot substances                  | 0 (0 to 1)    | 0 (0 to 1)    | -16.6% (-22.7% to -10.4%) |
| 7  | Madagascar | Foreign body in eyes                            | 0 (0 to 0)    | 0 (0 to 0)    | -0.5% (-1.3% to 0%)       |
| 8  | Madagascar | Foreign body in other body part                 | 3 (1 to 7)    | 3 (1 to 8)    | 5.5% (-0.7% to 12%)       |
| 9  | Madagascar | Motor vehicle road injuries                     | 48 (32 to 68) | 41 (27 to 58) | -14.2% (-21.1% to -6.4%)  |
| 10 | Madagascar | Motorcyclist road injuries                      | 17 (12 to 24) | 15 (10 to 21) | -12.9% (-19.8% to -5.1%)  |
| 11 | Madagascar | Non-venomous animal contact                     | 7 (3 to 14)   | 6 (3 to 12)   | -11.6% (-16.4% to -6.6%)  |
| 12 | Madagascar | Other exposure to mechanical forces             | 33 (17 to 59) | 30 (15 to 54) | -8.7% (-15.8% to -0.7%)   |
| 13 | Madagascar | Other road injuries                             | 2 (1 to 4)    | 2 (1 to 4)    | 5.2% (-4.3% to 16.2%)     |
| 14 | Madagascar | Other transport injuries                        | 3 (2 to 4)    | 3 (2 to 4)    | -3.9% (-11.7% to 3.4%)    |
| 15 | Madagascar | Other unintentional injuries                    | 3 (2 to 5)    | 3 (2 to 5)    | -10.5% (-17.8% to -2.8%)  |
| 16 | Madagascar | Pedestrian road injuries                        | 74 (55 to 96) | 62 (46 to 82) | -16.1% (-21.4% to -9.8%)  |
| 17 | Madagascar | Physical violence by firearm                    | 0 (0 to 0)    | 0 (0 to 0)    | 14.2% (1.7% to 28.7%)     |
| 18 | Madagascar | Physical violence by other means                | 4 (2 to 6)    | 4 (3 to 6)    | 10.4% (2.9% to 20.3%)     |
| 19 | Madagascar | Physical violence by sharp object               | 1 (1 to 2)    | 1 (1 to 2)    | 4.9% (-4.6% to 15.9%)     |
| 20 | Madagascar | Poisoning by carbon monoxide                    | 0 (0 to 0)    | 0 (0 to 0)    | 8.1% (-4.7% to 24.5%)     |
| 21 | Madagascar | Poisoning by other means                        | 0 (0 to 0)    | 0 (0 to 0)    | -23.5% (-31.2% to -15.6%) |
| 22 | Madagascar | Pulmonary aspiration and foreign body in airway | 0 (0 to 0)    | 0 (0 to 0)    | -9% (-20.3% to 1.6%)      |
| 23 | Madagascar | Self-harm by firearm                            | 0 (0 to 0)    | 0 (0 to 0)    | 5.6% (-1.7% to 14.8%)     |
| 24 | Madagascar | Self-harm by other specified means              | 0 (0 to 0)    | 0 (0 to 0)    | -18.1% (-23.2% to -13.2%) |
| 25 | Madagascar | Unintentional firearm injuries                  | 1 (0 to 2)    | 1 (0 to 2)    | -12% (-20.4% to -2%)      |
| 26 | Madagascar | Venomous animal contact                         | 1 (0 to 3)    | 1 (0 to 3)    | -18.9% (-27.1% to -12.1%) |
| 27 | Malawi     | Adverse effects of medical treatment            | 0 (0 to 0)    | 0 (0 to 0)    | 0% (0% to 0%)             |
| 28 | Malawi     | Conflict and terrorism                          | 0 (0 to 0)    | 0 (0 to 0)    | NA                        |
| 29 | Malawi     | Cyclist road injuries                           | 30 (19 to 44) | 29 (19 to 41) | -4% (-10.5% to 4.2%)      |
| 30 | Malawi     | Drowning                                        | 0 (0 to 0)    | 0 (0 to 0)    | -5.7% (-13.1% to 1.5%)    |
| 31 | Malawi     | Environmental heat and cold exposure            | 0 (0 to 1)    | 0 (0 to 1)    | 1.1% (-4.9% to 7.7%)      |
| 32 | Malawi     | Executions and police conflict                  | 0 (0 to 0)    | 0 (0 to 0)    | NA                        |
| 33 | Malawi     | Exposure to forces of nature                    | 0 (0 to 0)    | 1 (0 to 1)    | NA                        |
| 34 | Malawi     | Falls                                           | 24 (15 to 36) | 28 (18 to 43) | 19% (14.7% to 23.4%)      |
| 35 | Malawi     | Fire, heat, and hot substances                  | 0 (0 to 1)    | 0 (0 to 1)    | -7.3% (-13% to -1.5%)     |
| 36 | Malawi     | Foreign body in eyes                            | 0 (0 to 0)    | 0 (0 to 0)    | -0.7% (-1.8% to -0.1%)    |
| 37 | Malawi     | Foreign body in other body part                 | 3 (1 to 7)    | 3 (1 to 7)    | -1.2% (-7.1% to 5%)       |
| 38 | Malawi     | Motor vehicle road injuries                     | 34 (22 to 48) | 32 (21 to 45) | -5.8% (-14% to 2.5%)      |
| 39 | Malawi     | Motorcyclist road injuries                      | 19 (13 to 26) | 15 (10 to 21) | -18.5% (-24.8% to -11.8%) |
| 40 | Malawi     | Non-venomous animal contact                     | 5 (3 to 11)   | 5 (2 to 10)   | -7.5% (-12.5% to -2.5%)   |
| 41 | Malawi     | Other exposure to mechanical forces             | 24 (12 to 44) | 24 (12 to 44) | 0.8% (-5.4% to 7.8%)      |
| 42 | Malawi     | Other road injuries                             | 1 (1 to 3)    | 1 (1 to 3)    | 0.3% (-8.7% to 10.5%)     |
| 43 | Malawi     | Other transport injuries                        | 3 (2 to 4)    | 3 (2 to 4)    | 1.5% (-5.3% to 7.6%)      |
| 44 | Malawi     | Other unintentional injuries                    | 2 (1 to 4)    | 2 (1 to 4)    | -1.6% (-10.2% to 6.8%)    |
| 45 |            |                                                 |               |               |                           |
| 46 |            |                                                 |               |               |                           |

|    |          |                                                 |               |                |                           |
|----|----------|-------------------------------------------------|---------------|----------------|---------------------------|
| 1  |          |                                                 |               |                |                           |
| 2  | Malawi   | Pedestrian road injuries                        | 52 (38 to 68) | 47 (34 to 62)  | -10.3% (-16.4% to -3.2%)  |
| 3  | Malawi   | Physical violence by firearm                    | 0 (0 to 0)    | 0 (0 to 0)     | 33.7% (19.8% to 49.7%)    |
| 4  | Malawi   | Physical violence by other means                | 3 (2 to 5)    | 3 (2 to 5)     | 9.8% (4.2% to 16.9%)      |
| 5  | Malawi   | Physical violence by sharp object               | 1 (0 to 2)    | 1 (1 to 2)     | 7.7% (1% to 15.6%)        |
| 6  | Malawi   | Poisoning by carbon monoxide                    | 0 (0 to 0)    | 0 (0 to 0)     | 10.4% (-0.5% to 23.2%)    |
| 7  | Malawi   | Poisoning by other means                        | 0 (0 to 0)    | 0 (0 to 0)     | -12.5% (-20.1% to -5%)    |
| 8  | Malawi   | Pulmonary aspiration and foreign body in airway | 0 (0 to 0)    | 0 (0 to 0)     | -13.4% (-23.1% to -2.9%)  |
| 9  | Malawi   | Self-harm by firearm                            | 0 (0 to 0)    | 0 (0 to 0)     | 10.8% (2.3% to 23.1%)     |
| 10 | Malawi   | Self-harm by other specified means              | 0 (0 to 0)    | 0 (0 to 0)     | -12.9% (-18.5% to -7.2%)  |
| 11 | Malawi   | Unintentional firearm injuries                  | 1 (0 to 2)    | 1 (0 to 2)     | -7.2% (-15.5% to 2.6%)    |
| 12 | Malawi   | Venomous animal contact                         | 1 (0 to 2)    | 1 (0 to 2)     | -5.4% (-14.6% to 3%)      |
| 13 | Malaysia | Adverse effects of medical treatment            | 0 (0 to 0)    | 0 (0 to 0)     | 0% (0% to 0%)             |
| 14 | Malaysia | Conflict and terrorism                          | 0 (0 to 0)    | 0 (0 to 0)     | NA                        |
| 15 | Malaysia | Cyclist road injuries                           | 21 (14 to 30) | 21 (14 to 30)  | 0.3% (-8.8% to 10.2%)     |
| 16 | Malaysia | Drowning                                        | 0 (0 to 0)    | 0 (0 to 1)     | 38.2% (25.5% to 52.4%)    |
| 17 | Malaysia | Environmental heat and cold exposure            | 2 (1 to 3)    | 2 (1 to 3)     | 3.8% (-0.6% to 8.7%)      |
| 18 | Malaysia | Executions and police conflict                  | 0 (0 to 0)    | 0 (0 to 0)     | NA                        |
| 19 | Malaysia | Exposure to forces of nature                    | 0 (0 to 0)    | 0 (0 to 0)     | NA                        |
| 20 | Malaysia | Falls                                           | 57 (45 to 72) | 80 (64 to 101) | 40.2% (35% to 44.9%)      |
| 21 | Malaysia | Fire, heat, and hot substances                  | 1 (1 to 2)    | 1 (1 to 2)     | -10.6% (-15.7% to -6.2%)  |
| 22 | Malaysia | Foreign body in eyes                            | 0 (0 to 0)    | 0 (0 to 0)     | 1.6% (1.1% to 2.4%)       |
| 23 | Malaysia | Foreign body in other body part                 | 1 (0 to 2)    | 1 (0 to 2)     | 1.4% (-3.5% to 5.8%)      |
| 24 | Malaysia | Motor vehicle road injuries                     | 49 (37 to 63) | 53 (40 to 67)  | 8.1% (-2.1% to 19.6%)     |
| 25 | Malaysia | Motorcyclist road injuries                      | 58 (46 to 72) | 62 (48 to 77)  | 6.1% (-3.2% to 17.7%)     |
| 26 | Malaysia | Non-venomous animal contact                     | 4 (2 to 7)    | 3 (2 to 5)     | -22.2% (-26.5% to -18.1%) |
| 27 | Malaysia | Other exposure to mechanical forces             | 19 (11 to 32) | 18 (10 to 29)  | -7.2% (-12.2% to -2.5%)   |
| 28 | Malaysia | Other road injuries                             | 2 (1 to 3)    | 2 (1 to 3)     | 0.2% (-10.1% to 10.6%)    |
| 29 | Malaysia | Other transport injuries                        | 8 (6 to 10)   | 7 (6 to 9)     | -9.5% (-15.2% to -3.7%)   |
| 30 | Malaysia | Other unintentional injuries                    | 11 (7 to 18)  | 10 (6 to 16)   | -15.3% (-22.9% to -9.7%)  |
| 31 | Malaysia | Pedestrian road injuries                        | 25 (19 to 32) | 23 (17 to 29)  | -9.2% (-16.3% to -1.5%)   |
| 32 | Malaysia | Physical violence by firearm                    | 0 (0 to 0)    | 0 (0 to 0)     | 91% (74.1% to 110%)       |
| 33 | Malaysia | Physical violence by other means                | 17 (12 to 24) | 18 (13 to 26)  | 6.4% (-0.3% to 14.2%)     |
| 34 | Malaysia | Physical violence by sharp object               | 2 (1 to 3)    | 2 (1 to 3)     | 2.1% (-6.8% to 12.4%)     |
| 35 | Malaysia | Poisoning by carbon monoxide                    | 0 (0 to 0)    | 0 (0 to 0)     | 24.8% (13.5% to 37.7%)    |
| 36 | Malaysia | Poisoning by other means                        | 0 (0 to 0)    | 0 (0 to 0)     | -21% (-27.5% to -13.9%)   |
| 37 | Malaysia | Pulmonary aspiration and foreign body in airway | 0 (0 to 1)    | 0 (0 to 0)     | -17.1% (-24.8% to -8.2%)  |
| 38 | Malaysia | Self-harm by firearm                            | 0 (0 to 0)    | 0 (0 to 0)     | 30.9% (10.9% to 56.4%)    |
| 39 | Malaysia | Self-harm by other specified means              | 1 (1 to 2)    | 1 (1 to 2)     | 1.4% (-4.6% to 7.8%)      |
| 40 | Malaysia | Unintentional firearm injuries                  | 2 (1 to 3)    | 2 (1 to 3)     | -4% (-11% to 3.4%)        |
| 41 | Malaysia | Venomous animal contact                         | 1 (0 to 2)    | 1 (0 to 2)     | -25.2% (-31.1% to -19.3%) |
| 42 | Maldives | Adverse effects of medical treatment            | 0 (0 to 0)    | 0 (0 to 0)     | 0% (0% to 0%)             |
| 43 | Maldives | Conflict and terrorism                          | 0 (0 to 0)    | 0 (0 to 0)     | NA                        |
| 44 | Maldives | Cyclist road injuries                           | 19 (13 to 27) | 13 (9 to 19)   | -30.8% (-38.7% to -22.4%) |
| 45 |          |                                                 |               |                |                           |
| 46 |          |                                                 |               |                |                           |

|    |          |                                                 |               |                |                           |
|----|----------|-------------------------------------------------|---------------|----------------|---------------------------|
| 1  |          |                                                 |               |                |                           |
| 2  | Maldives | Drowning                                        | 1 (0 to 1)    | 1 (0 to 1)     | 23% (8% to 41.2%)         |
| 3  | Maldives | Environmental heat and cold exposure            | 1 (1 to 2)    | 1 (1 to 2)     | -4.7% (-9.1% to 0.5%)     |
| 4  | Maldives | Executions and police conflict                  | 0 (0 to 0)    | 0 (0 to 0)     | NA                        |
| 5  | Maldives | Exposure to forces of nature                    | 0 (0 to 0)    | 0 (0 to 0)     | NA                        |
| 6  | Maldives | Falls                                           | 58 (46 to 73) | 88 (70 to 109) | 50.4% (43.6% to 57.3%)    |
| 7  | Maldives | Fire, heat, and hot substances                  | 2 (1 to 3)    | 1 (1 to 2)     | -33.8% (-42.6% to -26%)   |
| 8  | Maldives | Foreign body in eyes                            | 0 (0 to 0)    | 0 (0 to 0)     | 6.4% (3.4% to 10.3%)      |
| 9  | Maldives | Foreign body in other body part                 | 1 (0 to 2)    | 1 (1 to 2)     | 6.2% (0.5% to 12.3%)      |
| 10 | Maldives | Motor vehicle road injuries                     | 13 (9 to 18)  | 11 (8 to 16)   | -13.1% (-21.3% to -3.7%)  |
| 11 | Maldives | Motorcyclist road injuries                      | 38 (30 to 47) | 27 (21 to 34)  | -27.8% (-34% to -21.7%)   |
| 12 | Maldives | Non-venomous animal contact                     | 5 (3 to 9)    | 4 (2 to 6)     | -28.1% (-34.2% to -21.9%) |
| 13 | Maldives | Other exposure to mechanical forces             | 23 (13 to 37) | 19 (11 to 31)  | -18.5% (-26.3% to -10.8%) |
| 14 | Maldives | Other road injuries                             | 1 (1 to 2)    | 1 (1 to 2)     | 7.9% (-3.2% to 21.8%)     |
| 15 | Maldives | Other transport injuries                        | 5 (4 to 7)    | 5 (4 to 7)     | 6.3% (-2% to 14.2%)       |
| 16 | Maldives | Other unintentional injuries                    | 12 (8 to 19)  | 9 (6 to 15)    | -25.4% (-33.3% to -16.3%) |
| 17 | Maldives | Pedestrian road injuries                        | 10 (7 to 13)  | 8 (6 to 11)    | -16.2% (-25% to -7.5%)    |
| 18 | Maldives | Physical violence by firearm                    | 0 (0 to 0)    | 0 (0 to 1)     | 203.5% (167.8% to 246.6%) |
| 19 | Maldives | Physical violence by other means                | 14 (10 to 20) | 18 (13 to 26)  | 28.3% (19.2% to 37.3%)    |
| 20 | Maldives | Physical violence by sharp object               | 2 (1 to 4)    | 3 (2 to 4)     | 20.4% (8.4% to 33.8%)     |
| 21 | Maldives | Poisoning by carbon monoxide                    | 0 (0 to 0)    | 0 (0 to 0)     | 45.2% (30.5% to 62.2%)    |
| 22 | Maldives | Poisoning by other means                        | 0 (0 to 0)    | 0 (0 to 0)     | 14% (6.7% to 21.3%)       |
| 23 | Maldives | Pulmonary aspiration and foreign body in airway | 0 (0 to 1)    | 0 (0 to 0)     | -38.1% (-45.5% to -29.8%) |
| 24 | Maldives | Self-harm by firearm                            | 0 (0 to 0)    | 0 (0 to 0)     | 29.9% (6.4% to 58.3%)     |
| 25 | Maldives | Self-harm by other specified means              | 1 (1 to 2)    | 1 (1 to 2)     | -15.3% (-21% to -9.5%)    |
| 26 | Maldives | Unintentional firearm injuries                  | 2 (1 to 4)    | 2 (1 to 4)     | -9% (-18.4% to 1.1%)      |
| 27 | Maldives | Venomous animal contact                         | 1 (0 to 3)    | 1 (0 to 2)     | -21.8% (-29.3% to -12%)   |
| 28 | Mali     | Adverse effects of medical treatment            | 0 (0 to 0)    | 0 (0 to 0)     | 0% (0% to 0%)             |
| 29 | Mali     | Conflict and terrorism                          | 32 (10 to 79) | 21 (6 to 53)   | NA                        |
| 30 | Mali     | Cyclist road injuries                           | 22 (13 to 32) | 26 (16 to 38)  | 19.5% (10.9% to 28.7%)    |
| 31 | Mali     | Drowning                                        | 0 (0 to 0)    | 0 (0 to 0)     | -9.8% (-17.7% to -1.8%)   |
| 32 | Mali     | Environmental heat and cold exposure            | 0 (0 to 1)    | 0 (0 to 1)     | 1.4% (-4.3% to 8.1%)      |
| 33 | Mali     | Executions and police conflict                  | 0 (0 to 0)    | 1 (0 to 2)     | NA                        |
| 34 | Mali     | Exposure to forces of nature                    | 0 (0 to 0)    | 0 (0 to 0)     | NA                        |
| 35 | Mali     | Falls                                           | 18 (12 to 27) | 22 (14 to 32)  | 16.6% (12.9% to 21.1%)    |
| 36 | Mali     | Fire, heat, and hot substances                  | 0 (0 to 0)    | 0 (0 to 0)     | -9.6% (-15.3% to -3.2%)   |
| 37 | Mali     | Foreign body in eyes                            | 0 (0 to 0)    | 0 (0 to 0)     | 0.8% (0.1% to 1.7%)       |
| 38 | Mali     | Foreign body in other body part                 | 4 (2 to 8)    | 4 (2 to 8)     | 0.5% (-4.7% to 5.1%)      |
| 39 | Mali     | Motor vehicle road injuries                     | 46 (32 to 64) | 49 (34 to 68)  | 7.4% (-0.5% to 16.2%)     |
| 40 | Mali     | Motorcyclist road injuries                      | 18 (13 to 26) | 19 (13 to 26)  | 1.4% (-6.2% to 9.4%)      |
| 41 | Mali     | Non-venomous animal contact                     | 3 (2 to 7)    | 3 (1 to 6)     | -15% (-20.1% to -10.3%)   |
| 42 | Mali     | Other exposure to mechanical forces             | 24 (12 to 44) | 21 (11 to 39)  | -9.7% (-14.9% to -3.9%)   |
| 43 | Mali     | Other road injuries                             | 2 (1 to 3)    | 2 (1 to 4)     | 16.9% (5.7% to 28.1%)     |
| 44 | Mali     | Other transport injuries                        | 3 (2 to 4)    | 3 (2 to 4)     | -9.2% (-15.8% to -2.1%)   |
| 45 |          |                                                 |               |                |                           |
| 46 |          |                                                 |               |                |                           |

|    |                  |                                                 |                  |                  |                           |
|----|------------------|-------------------------------------------------|------------------|------------------|---------------------------|
| 1  |                  |                                                 |                  |                  |                           |
| 2  | Mali             | Other unintentional injuries                    | 3 (2 to 5)       | 2 (1 to 4)       | -17.5% (-22% to -12.8%)   |
| 3  | Mali             | Pedestrian road injuries                        | 55 (40 to 71)    | 49 (36 to 65)    | -9.8% (-15.5% to -4.1%)   |
| 4  | Mali             | Physical violence by firearm                    | 0 (0 to 0)       | 0 (0 to 0)       | 22% (8.9% to 36.8%)       |
| 5  | Mali             | Physical violence by other means                | 9 (6 to 14)      | 9 (6 to 14)      | 2.5% (-3% to 8.2%)        |
| 6  | Mali             | Physical violence by sharp object               | 3 (2 to 6)       | 3 (2 to 6)       | 1% (-6.2% to 9.1%)        |
| 7  | Mali             | Poisoning by carbon monoxide                    | 0 (0 to 0)       | 0 (0 to 0)       | 7.8% (-3.3% to 20.7%)     |
| 8  | Mali             | Poisoning by other means                        | 0 (0 to 0)       | 0 (0 to 0)       | -20% (-27.1% to -12.2%)   |
| 9  | Mali             | Pulmonary aspiration and foreign body in airway | 0 (0 to 0)       | 0 (0 to 0)       | -16.9% (-24.7% to -8.7%)  |
| 10 | Mali             | Self-harm by firearm                            | 0 (0 to 0)       | 0 (0 to 0)       | 13.9% (6.1% to 23.7%)     |
| 11 | Mali             | Self-harm by other specified means              | 0 (0 to 0)       | 0 (0 to 0)       | -4.4% (-9.8% to 1%)       |
| 12 | Mali             | Unintentional firearm injuries                  | 1 (0 to 2)       | 1 (0 to 2)       | -14.4% (-22.8% to -5.8%)  |
| 13 | Mali             | Venomous animal contact                         | 0 (0 to 1)       | 0 (0 to 1)       | -12.1% (-18.9% to -4.6%)  |
| 14 | Malta            | Adverse effects of medical treatment            | 0 (0 to 0)       | 0 (0 to 0)       | 0% (0% to 0%)             |
| 15 | Malta            | Conflict and terrorism                          | 0 (0 to 0)       | 0 (0 to 0)       | NA                        |
| 16 | Malta            | Cyclist road injuries                           | 18 (12 to 24)    | 17 (12 to 22)    | -6.8% (-15.9% to 3.5%)    |
| 17 | Malta            | Drowning                                        | 0 (0 to 0)       | 0 (0 to 0)       | 68.6% (55.7% to 83.5%)    |
| 18 | Malta            | Environmental heat and cold exposure            | 2 (2 to 3)       | 2 (1 to 3)       | -6.4% (-10.8% to -1.5%)   |
| 19 | Malta            | Executions and police conflict                  | 0 (0 to 0)       | 0 (0 to 0)       | NA                        |
| 20 | Malta            | Exposure to forces of nature                    | 0 (0 to 0)       | 0 (0 to 0)       | NA                        |
| 21 | Malta            | Falls                                           | 250 (194 to 321) | 290 (222 to 380) | 16% (11.7% to 20.3%)      |
| 22 | Malta            | Fire, heat, and hot substances                  | 3 (2 to 4)       | 3 (2 to 4)       | -2.3% (-7.4% to 2.9%)     |
| 23 | Malta            | Foreign body in eyes                            | 0 (0 to 0)       | 0 (0 to 0)       | 0.9% (0.4% to 1.7%)       |
| 24 | Malta            | Foreign body in other body part                 | 2 (1 to 3)       | 2 (1 to 3)       | 1.2% (-3.7% to 6.3%)      |
| 25 | Malta            | Motor vehicle road injuries                     | 22 (16 to 29)    | 17 (12 to 22)    | -24.4% (-33.2% to -14.6%) |
| 26 | Malta            | Motorcyclist road injuries                      | 8 (6 to 10)      | 8 (6 to 11)      | 3.5% (-11.3% to 22%)      |
| 27 | Malta            | Non-venomous animal contact                     | 3 (1 to 4)       | 2 (1 to 4)       | -18.9% (-22.6% to -15.1%) |
| 28 | Malta            | Other exposure to mechanical forces             | 49 (30 to 76)    | 46 (28 to 73)    | -5% (-10.8% to 2.4%)      |
| 29 | Malta            | Other road injuries                             | 1 (1 to 2)       | 1 (1 to 2)       | -0.5% (-10.6% to 11.4%)   |
| 30 | Malta            | Other transport injuries                        | 4 (3 to 5)       | 4 (3 to 5)       | 2.8% (-2% to 7.9%)        |
| 31 | Malta            | Other unintentional injuries                    | 28 (18 to 44)    | 22 (14 to 36)    | -20.3% (-25.5% to -15.8%) |
| 32 | Malta            | Pedestrian road injuries                        | 9 (6 to 11)      | 7 (5 to 9)       | -25.2% (-35.2% to -15%)   |
| 33 | Malta            | Physical violence by firearm                    | 1 (0 to 1)       | 1 (0 to 1)       | 24.1% (13.5% to 35.5%)    |
| 34 | Malta            | Physical violence by other means                | 22 (15 to 31)    | 21 (14 to 30)    | -3.8% (-9.4% to 3%)       |
| 35 | Malta            | Physical violence by sharp object               | 2 (1 to 3)       | 2 (1 to 3)       | -2.6% (-11% to 6.2%)      |
| 36 | Malta            | Poisoning by carbon monoxide                    | 0 (0 to 0)       | 0 (0 to 0)       | 11.3% (2.1% to 21.1%)     |
| 37 | Malta            | Poisoning by other means                        | 0 (0 to 0)       | 0 (0 to 0)       | -1.5% (-8.7% to 5.2%)     |
| 38 | Malta            | Pulmonary aspiration and foreign body in airway | 1 (0 to 1)       | 1 (0 to 1)       | -13.1% (-20.8% to -5%)    |
| 39 | Malta            | Self-harm by firearm                            | 0 (0 to 0)       | 0 (0 to 0)       | 13.4% (1.3% to 26.1%)     |
| 40 | Malta            | Self-harm by other specified means              | 1 (1 to 2)       | 1 (1 to 2)       | 5.5% (-0.6% to 11.4%)     |
| 41 | Malta            | Unintentional firearm injuries                  | 1 (1 to 2)       | 1 (1 to 2)       | -5.9% (-14.5% to 3.4%)    |
| 42 | Malta            | Venomous animal contact                         | 1 (0 to 2)       | 1 (0 to 2)       | -18.8% (-23.6% to -14%)   |
| 43 | Marshall Islands | Adverse effects of medical treatment            | 0 (0 to 0)       | 0 (0 to 0)       | 0% (0% to 0%)             |
| 44 | Marshall Islands | Conflict and terrorism                          | 0 (0 to 0)       | 0 (0 to 0)       | NA                        |
| 45 |                  |                                                 |                  |                  |                           |
| 46 |                  |                                                 |                  |                  |                           |



|    |                  |                                                 |                |                |                           |
|----|------------------|-------------------------------------------------|----------------|----------------|---------------------------|
| 1  |                  |                                                 |                |                |                           |
| 2  | Marshall Islands | Cyclist road injuries                           | 10 (7 to 14)   | 10 (7 to 15)   | 0.6% (-5.7% to 7.6%)      |
| 3  | Marshall Islands | Drowning                                        | 0 (0 to 1)     | 0 (0 to 1)     | 2% (-6.2% to 11.9%)       |
| 4  | Marshall Islands | Environmental heat and cold exposure            | 2 (2 to 3)     | 2 (2 to 3)     | -2.3% (-7.3% to 2.7%)     |
| 5  | Marshall Islands | Executions and police conflict                  | 0 (0 to 0)     | 0 (0 to 0)     | NA                        |
| 6  | Marshall Islands | Exposure to forces of nature                    | 0 (0 to 0)     | 0 (0 to 0)     | NA                        |
| 7  | Marshall Islands | Falls                                           | 48 (37 to 61)  | 65 (51 to 85)  | 37.7% (32.7% to 42.8%)    |
| 8  | Marshall Islands | Fire, heat, and hot substances                  | 1 (1 to 2)     | 1 (1 to 2)     | -0.2% (-6.1% to 6.3%)     |
| 9  | Marshall Islands | Foreign body in eyes                            | 0 (0 to 0)     | 0 (0 to 0)     | 0.6% (-0.1% to 1.7%)      |
| 10 | Marshall Islands | Foreign body in other body part                 | 1 (0 to 1)     | 1 (0 to 1)     | -2.4% (-7% to 2.7%)       |
| 11 | Marshall Islands | Motor vehicle road injuries                     | 35 (27 to 44)  | 35 (27 to 44)  | -0.2% (-6.8% to 6.3%)     |
| 12 | Marshall Islands | Motorcyclist road injuries                      | 14 (10 to 18)  | 14 (10 to 18)  | 0% (-8.2% to 8.2%)        |
| 13 | Marshall Islands | Non-venomous animal contact                     | 5 (3 to 8)     | 4 (2 to 7)     | -14.8% (-19.1% to -10.6%) |
| 14 | Marshall Islands | Other exposure to mechanical forces             | 14 (8 to 22)   | 11 (7 to 19)   | -15.8% (-20.7% to -10.8%) |
| 15 | Marshall Islands | Other road injuries                             | 1 (1 to 2)     | 1 (1 to 2)     | -0.2% (-8.8% to 8.8%)     |
| 16 | Marshall Islands | Other transport injuries                        | 8 (6 to 10)    | 8 (6 to 10)    | -4.9% (-9.4% to -0.1%)    |
| 17 | Marshall Islands | Other unintentional injuries                    | 7 (4 to 11)    | 7 (4 to 10)    | -4.2% (-8.6% to 0.5%)     |
| 18 | Marshall Islands | Pedestrian road injuries                        | 14 (11 to 18)  | 13 (10 to 17)  | -7.3% (-14.5% to 0.7%)    |
| 19 | Marshall Islands | Physical violence by firearm                    | 0 (0 to 0)     | 0 (0 to 0)     | -11% (-22.7% to 3.1%)     |
| 20 | Marshall Islands | Physical violence by other means                | 36 (25 to 50)  | 33 (23 to 46)  | -8% (-13.7% to -1.2%)     |
| 21 | Marshall Islands | Physical violence by sharp object               | 3 (2 to 5)     | 2 (1 to 4)     | -23.2% (-31.3% to -14.5%) |
| 22 | Marshall Islands | Poisoning by carbon monoxide                    | 0 (0 to 0)     | 0 (0 to 0)     | 5.6% (-5.2% to 17.1%)     |
| 23 | Marshall Islands | Poisoning by other means                        | 0 (0 to 0)     | 0 (0 to 0)     | -16.6% (-23.9% to -8.8%)  |
| 24 | Marshall Islands | Pulmonary aspiration and foreign body in airway | 0 (0 to 0)     | 0 (0 to 0)     | 3.3% (-8.9% to 18.1%)     |
| 25 | Marshall Islands | Self-harm by firearm                            | 1 (1 to 2)     | 1 (1 to 2)     | -8.9% (-21% to 4.6%)      |
| 26 | Marshall Islands | Self-harm by other specified means              | 3 (2 to 4)     | 3 (2 to 4)     | 1.3% (-5.5% to 8.8%)      |
| 27 | Marshall Islands | Unintentional firearm injuries                  | 2 (1 to 3)     | 2 (1 to 3)     | -22.7% (-29.1% to -16.3%) |
| 28 | Marshall Islands | Venomous animal contact                         | 3 (1 to 6)     | 3 (1 to 5)     | -9.4% (-14.3% to -3.2%)   |
| 29 | Mauritania       | Adverse effects of medical treatment            | 0 (0 to 0)     | 0 (0 to 0)     | 0% (0% to 0%)             |
| 30 | Mauritania       | Conflict and terrorism                          | 7 (2 to 17)    | 0 (0 to 0)     | NA                        |
| 31 | Mauritania       | Cyclist road injuries                           | 28 (17 to 43)  | 27 (17 to 40)  | -4.8% (-12.4% to 3.8%)    |
| 32 | Mauritania       | Drowning                                        | 0 (0 to 0)     | 0 (0 to 0)     | 0.8% (-7.8% to 11.3%)     |
| 33 | Mauritania       | Environmental heat and cold exposure            | 0 (0 to 1)     | 0 (0 to 1)     | -5.3% (-10.8% to 0.4%)    |
| 34 | Mauritania       | Executions and police conflict                  | 0 (0 to 0)     | 0 (0 to 0)     | NA                        |
| 35 | Mauritania       | Exposure to forces of nature                    | 0 (0 to 0)     | 0 (0 to 0)     | NA                        |
| 36 | Mauritania       | Falls                                           | 17 (11 to 26)  | 20 (13 to 30)  | 16.3% (11.6% to 20.9%)    |
| 37 | Mauritania       | Fire, heat, and hot substances                  | 0 (0 to 0)     | 0 (0 to 0)     | -9.5% (-15.2% to -3.8%)   |
| 38 | Mauritania       | Foreign body in eyes                            | 0 (0 to 0)     | 0 (0 to 0)     | 0.5% (0% to 1.4%)         |
| 39 | Mauritania       | Foreign body in other body part                 | 4 (1 to 8)     | 3 (1 to 7)     | -2.5% (-8.2% to 3.1%)     |
| 40 | Mauritania       | Motor vehicle road injuries                     | 89 (62 to 125) | 79 (56 to 109) | -11.2% (-17.4% to -4.2%)  |
| 41 | Mauritania       | Motorcyclist road injuries                      | 35 (25 to 48)  | 29 (20 to 40)  | -17.2% (-23.6% to -10.4%) |
| 42 | Mauritania       | Non-venomous animal contact                     | 3 (1 to 6)     | 3 (1 to 5)     | -9.1% (-14% to -4.5%)     |
| 43 | Mauritania       | Other exposure to mechanical forces             | 27 (13 to 49)  | 24 (12 to 44)  | -11.1% (-16.9% to -4.4%)  |
| 44 | Mauritania       | Other road injuries                             | 2 (1 to 5)     | 2 (1 to 4)     | -5.8% (-14.9% to 4.5%)    |
| 45 |                  |                                                 |                |                |                           |
| 46 |                  |                                                 |                |                |                           |

|    |            |                                                 |               |               |                           |
|----|------------|-------------------------------------------------|---------------|---------------|---------------------------|
| 1  |            |                                                 |               |               |                           |
| 2  | Mauritania | Other transport injuries                        | 3 (2 to 4)    | 3 (2 to 4)    | -14.2% (-21.7% to -7.7%)  |
| 3  | Mauritania | Other unintentional injuries                    | 3 (2 to 5)    | 2 (1 to 4)    | -15.7% (-21.3% to -9.6%)  |
| 4  | Mauritania | Pedestrian road injuries                        | 73 (52 to 99) | 59 (42 to 79) | -20.1% (-25.6% to -14.4%) |
| 5  | Mauritania | Physical violence by firearm                    | 0 (0 to 0)    | 0 (0 to 0)    | 51.7% (29.3% to 77.3%)    |
| 6  | Mauritania | Physical violence by other means                | 8 (6 to 13)   | 8 (6 to 13)   | 1.1% (-4.1% to 6.3%)      |
| 7  | Mauritania | Physical violence by sharp object               | 2 (1 to 4)    | 2 (1 to 4)    | 3.3% (-4.6% to 11.6%)     |
| 8  | Mauritania | Poisoning by carbon monoxide                    | 0 (0 to 0)    | 0 (0 to 0)    | 20.9% (9.7% to 33.8%)     |
| 9  | Mauritania | Poisoning by other means                        | 0 (0 to 0)    | 0 (0 to 0)    | -16.7% (-24% to -9.2%)    |
| 10 | Mauritania | Pulmonary aspiration and foreign body in airway | 0 (0 to 0)    | 0 (0 to 0)    | -1.2% (-9.3% to 7.7%)     |
| 11 | Mauritania | Self-harm by firearm                            | 0 (0 to 0)    | 0 (0 to 0)    | 2.6% (-4.1% to 10.6%)     |
| 12 | Mauritania | Self-harm by other specified means              | 0 (0 to 0)    | 0 (0 to 0)    | -6.9% (-13.1% to -0.7%)   |
| 13 | Mauritania | Unintentional firearm injuries                  | 1 (0 to 2)    | 1 (0 to 2)    | -15.2% (-23.5% to -5.8%)  |
| 14 | Mauritania | Venomous animal contact                         | 0 (0 to 1)    | 0 (0 to 1)    | -9.1% (-16% to -2.8%)     |
| 15 | Mauritius  | Adverse effects of medical treatment            | 0 (0 to 0)    | 0 (0 to 0)    | 0% (0% to 0%)             |
| 16 | Mauritius  | Conflict and terrorism                          | 0 (0 to 0)    | 0 (0 to 0)    | NA                        |
| 17 | Mauritius  | Cyclist road injuries                           | 8 (5 to 13)   | 9 (5 to 15)   | 11% (-3.6% to 26.8%)      |
| 18 | Mauritius  | Drowning                                        | 0 (0 to 0)    | 0 (0 to 0)    | 10.1% (0.9% to 20.3%)     |
| 19 | Mauritius  | Environmental heat and cold exposure            | 0 (0 to 0)    | 0 (0 to 0)    | 1.8% (-3.2% to 7%)        |
| 20 | Mauritius  | Executions and police conflict                  | 0 (0 to 0)    | 0 (0 to 0)    | NA                        |
| 21 | Mauritius  | Exposure to forces of nature                    | 0 (0 to 0)    | 0 (0 to 0)    | NA                        |
| 22 | Mauritius  | Falls                                           | 24 (15 to 37) | 39 (25 to 60) | 66.4% (57.8% to 76%)      |
| 23 | Mauritius  | Fire, heat, and hot substances                  | 1 (0 to 1)    | 0 (0 to 1)    | -53.3% (-58.3% to -48%)   |
| 24 | Mauritius  | Foreign body in eyes                            | 0 (0 to 0)    | 0 (0 to 0)    | 0.3% (0% to 0.7%)         |
| 25 | Mauritius  | Foreign body in other body part                 | 1 (0 to 2)    | 1 (0 to 2)    | 2.4% (-1.9% to 7%)        |
| 26 | Mauritius  | Motor vehicle road injuries                     | 36 (25 to 51) | 28 (18 to 42) | -23.7% (-33.5% to -13.4%) |
| 27 | Mauritius  | Motorcyclist road injuries                      | 38 (28 to 51) | 53 (40 to 67) | 37.6% (21.8% to 57%)      |
| 28 | Mauritius  | Non-venomous animal contact                     | 2 (1 to 4)    | 2 (1 to 4)    | -18.9% (-22.7% to -15.1%) |
| 29 | Mauritius  | Other exposure to mechanical forces             | 25 (12 to 47) | 26 (12 to 49) | 3.8% (-0.7% to 9%)        |
| 30 | Mauritius  | Other road injuries                             | 1 (1 to 3)    | 1 (1 to 3)    | 12.3% (-2.7% to 27.5%)    |
| 31 | Mauritius  | Other transport injuries                        | 2 (2 to 4)    | 3 (2 to 5)    | 22.4% (9.7% to 37.2%)     |
| 32 | Mauritius  | Other unintentional injuries                    | 3 (2 to 6)    | 3 (2 to 5)    | -4.9% (-12.4% to 2.1%)    |
| 33 | Mauritius  | Pedestrian road injuries                        | 21 (14 to 28) | 15 (10 to 21) | -27.8% (-36% to -18.2%)   |
| 34 | Mauritius  | Physical violence by firearm                    | 0 (0 to 0)    | 0 (0 to 0)    | 43.2% (28.7% to 60.5%)    |
| 35 | Mauritius  | Physical violence by other means                | 15 (10 to 23) | 17 (11 to 25) | 11% (3.4% to 18.8%)       |
| 36 | Mauritius  | Physical violence by sharp object               | 2 (1 to 4)    | 3 (1 to 5)    | 26.1% (12.2% to 44.6%)    |
| 37 | Mauritius  | Poisoning by carbon monoxide                    | 0 (0 to 0)    | 0 (0 to 0)    | 30.3% (19.4% to 47.6%)    |
| 38 | Mauritius  | Poisoning by other means                        | 0 (0 to 0)    | 0 (0 to 0)    | -1.3% (-6.5% to 4.4%)     |
| 39 | Mauritius  | Pulmonary aspiration and foreign body in airway | 0 (0 to 0)    | 0 (0 to 0)    | 2.1% (-8.2% to 14.8%)     |
| 40 | Mauritius  | Self-harm by firearm                            | 0 (0 to 0)    | 0 (0 to 0)    | -10.1% (-22.9% to 6.7%)   |
| 41 | Mauritius  | Self-harm by other specified means              | 0 (0 to 1)    | 0 (0 to 1)    | -22.5% (-27.9% to -16.6%) |
| 42 | Mauritius  | Unintentional firearm injuries                  | 1 (0 to 2)    | 1 (0 to 2)    | 5.3% (-2.3% to 13.6%)     |
| 43 | Mauritius  | Venomous animal contact                         | 0 (0 to 1)    | 0 (0 to 1)    | -17% (-23.1% to -9.3%)    |
| 44 | Mexico     | Adverse effects of medical treatment            | 0 (0 to 0)    | 0 (0 to 0)    | 0% (0% to 0%)             |
| 45 |            |                                                 |               |               |                           |
| 46 |            |                                                 |               |               |                           |

|    |                                  |                                                 |                |                |                           |
|----|----------------------------------|-------------------------------------------------|----------------|----------------|---------------------------|
| 1  |                                  |                                                 |                |                |                           |
| 2  | Mexico                           | Conflict and terrorism                          | 0 (0 to 0)     | 0 (0 to 0)     | NA                        |
| 3  | Mexico                           | Cyclist road injuries                           | 14 (8 to 22)   | 12 (7 to 18)   | -15.2% (-19.8% to -9.9%)  |
| 4  | Mexico                           | Drowning                                        | 0 (0 to 0)     | 0 (0 to 0)     | -43.3% (-47% to -39.7%)   |
| 5  | Mexico                           | Environmental heat and cold exposure            | 1 (0 to 2)     | 1 (0 to 1)     | -29.3% (-35.8% to -23.9%) |
| 6  | Mexico                           | Executions and police conflict                  | 0 (0 to 0)     | 0 (0 to 0)     | NA                        |
| 7  | Mexico                           | Exposure to forces of nature                    | 0 (0 to 1)     | 0 (0 to 0)     | NA                        |
| 8  | Mexico                           | Falls                                           | 77 (49 to 116) | 63 (40 to 95)  | -18% (-20.1% to -15.4%)   |
| 9  | Mexico                           | Fire, heat, and hot substances                  | 1 (0 to 1)     | 1 (0 to 1)     | -22% (-26.7% to -17.9%)   |
| 10 | Mexico                           | Foreign body in eyes                            | 0 (0 to 0)     | 0 (0 to 0)     | -0.3% (-0.8% to 0%)       |
| 11 | Mexico                           | Foreign body in other body part                 | 1 (1 to 3)     | 1 (1 to 3)     | -0.1% (-2.4% to 1.6%)     |
| 12 | Mexico                           | Motor vehicle road injuries                     | 40 (27 to 57)  | 39 (27 to 54)  | -3.7% (-7.3% to 0.3%)     |
| 13 | Mexico                           | Motorcyclist road injuries                      | 14 (9 to 21)   | 14 (10 to 21)  | 1% (-4.7% to 7.9%)        |
| 14 | Mexico                           | Non-venomous animal contact                     | 4 (2 to 8)     | 3 (1 to 7)     | -18.7% (-22.6% to -15%)   |
| 15 | Mexico                           | Other exposure to mechanical forces             | 77 (38 to 139) | 60 (30 to 111) | -21.7% (-25.8% to -16.8%) |
| 16 | Mexico                           | Other road injuries                             | 11 (6 to 19)   | 10 (5 to 17)   | -10.5% (-15.2% to -5.4%)  |
| 17 | Mexico                           | Other transport injuries                        | 3 (2 to 4)     | 2 (1 to 4)     | -12% (-16.3% to -8.1%)    |
| 18 | Mexico                           | Other unintentional injuries                    | 5 (3 to 9)     | 3 (2 to 6)     | -28.5% (-33.9% to -23.5%) |
| 19 | Mexico                           | Pedestrian road injuries                        | 34 (24 to 47)  | 22 (15 to 30)  | -37% (-40.1% to -34%)     |
| 20 | Mexico                           | Physical violence by firearm                    | 1 (1 to 2)     | 3 (1 to 5)     | 99.6% (82.6% to 117.9%)   |
| 21 | Mexico                           | Physical violence by other means                | 25 (16 to 38)  | 26 (16 to 40)  | 3.8% (-2.1% to 8.7%)      |
| 22 | Mexico                           | Physical violence by sharp object               | 6 (3 to 11)    | 7 (3 to 13)    | 21.8% (14.8% to 28.9%)    |
| 23 | Mexico                           | Poisoning by carbon monoxide                    | 0 (0 to 0)     | 0 (0 to 0)     | 1.1% (-14.8% to 13.3%)    |
| 24 | Mexico                           | Poisoning by other means                        | 0 (0 to 0)     | 0 (0 to 0)     | -11.9% (-19.6% to -5.1%)  |
| 25 | Mexico                           | Pulmonary aspiration and foreign body in airway | 0 (0 to 0)     | 0 (0 to 0)     | -44% (-48.6% to -39.7%)   |
| 26 | Mexico                           | Self-harm by firearm                            | 0 (0 to 0)     | 0 (0 to 0)     | 36.7% (26% to 45.6%)      |
| 27 | Mexico                           | Self-harm by other specified means              | 0 (0 to 0)     | 0 (0 to 0)     | 100.9% (88.3% to 117.5%)  |
| 28 | Mexico                           | Unintentional firearm injuries                  | 2 (1 to 5)     | 1 (1 to 3)     | -44.8% (-50% to -39.7%)   |
| 29 | Mexico                           | Venomous animal contact                         | 3 (1 to 6)     | 2 (1 to 5)     | -24.2% (-29.5% to -20.1%) |
| 30 | Micronesia (Federated States of) | Adverse effects of medical treatment            | 0 (0 to 0)     | 0 (0 to 0)     | 0% (0% to 0%)             |
| 31 | Micronesia (Federated States of) | Conflict and terrorism                          | 0 (0 to 0)     | 0 (0 to 0)     | NA                        |
| 32 | Micronesia (Federated States of) | Cyclist road injuries                           | 12 (8 to 17)   | 12 (8 to 16)   | -5.3% (-12.4% to 2.3%)    |
| 33 | Micronesia (Federated States of) | Drowning                                        | 1 (0 to 1)     | 1 (0 to 1)     | 4% (-6.2% to 16.2%)       |
| 34 | Micronesia (Federated States of) | Environmental heat and cold exposure            | 3 (2 to 4)     | 2 (2 to 4)     | -5% (-11.6% to 1.3%)      |
| 35 | Micronesia (Federated States of) | Executions and police conflict                  | 0 (0 to 0)     | 0 (0 to 0)     | NA                        |
| 36 | Micronesia (Federated States of) | Exposure to forces of nature                    | 0 (0 to 0)     | 0 (0 to 0)     | NA                        |
| 37 | Micronesia (Federated States of) | Falls                                           | 47 (37 to 61)  | 73 (57 to 94)  | 54.4% (48.4% to 59.9%)    |
| 38 | Micronesia (Federated States of) | Fire, heat, and hot substances                  | 1 (1 to 2)     | 1 (1 to 2)     | -0.6% (-7.6% to 7%)       |
| 39 | Micronesia (Federated States of) | Foreign body in eyes                            | 0 (0 to 0)     | 0 (0 to 0)     | -0.8% (-1.5% to -0.3%)    |
| 40 | Micronesia (Federated States of) | Foreign body in other body part                 | 1 (0 to 1)     | 1 (0 to 1)     | -2.9% (-7.2% to 1.9%)     |
| 41 | Micronesia (Federated States of) | Motor vehicle road injuries                     | 44 (34 to 55)  | 41 (32 to 51)  | -7.6% (-13.8% to -1.2%)   |
| 42 | Micronesia (Federated States of) | Motorcyclist road injuries                      | 14 (10 to 18)  | 14 (11 to 19)  | 6.2% (-3.6% to 16%)       |
| 43 | Micronesia (Federated States of) | Non-venomous animal contact                     | 5 (3 to 9)     | 4 (2 to 8)     | -13.1% (-17.7% to -8.9%)  |
| 44 | Micronesia (Federated States of) | Other exposure to mechanical forces             | 13 (8 to 21)   | 11 (6 to 18)   | -16% (-21.2% to -11%)     |
| 45 |                                  |                                                 |                |                |                           |
| 46 |                                  |                                                 |                |                |                           |

|    |                                  |                                                 |                |                 |                           |
|----|----------------------------------|-------------------------------------------------|----------------|-----------------|---------------------------|
| 1  |                                  |                                                 |                |                 |                           |
| 2  | Micronesia (Federated States of) | Other road injuries                             | 1 (1 to 2)     | 1 (1 to 2)      | -6.9% (-16.1% to 2.4%)    |
| 3  | Micronesia (Federated States of) | Other transport injuries                        | 8 (6 to 10)    | 7 (5 to 9)      | -7.7% (-12.6% to -2.3%)   |
| 4  | Micronesia (Federated States of) | Other unintentional injuries                    | 7 (5 to 11)    | 6 (4 to 10)     | -8.1% (-12.3% to -3.5%)   |
| 5  | Micronesia (Federated States of) | Pedestrian road injuries                        | 9 (7 to 12)    | 8 (6 to 10)     | -11.8% (-19.3% to -4.3%)  |
| 6  | Micronesia (Federated States of) | Physical violence by firearm                    | 0 (0 to 0)     | 0 (0 to 0)      | 3.8% (-9.8% to 19.8%)     |
| 7  | Micronesia (Federated States of) | Physical violence by other means                | 34 (24 to 48)  | 34 (24 to 48)   | -0.2% (-6.3% to 6.3%)     |
| 8  | Micronesia (Federated States of) | Physical violence by sharp object               | 3 (2 to 4)     | 2 (1 to 4)      | -15.7% (-24.3% to -6.4%)  |
| 9  | Micronesia (Federated States of) | Poisoning by carbon monoxide                    | 0 (0 to 0)     | 0 (0 to 0)      | 11.7% (0.4% to 24%)       |
| 10 | Micronesia (Federated States of) | Poisoning by other means                        | 0 (0 to 0)     | 0 (0 to 0)      | -19.3% (-27% to -11.7%)   |
| 11 | Micronesia (Federated States of) | Pulmonary aspiration and foreign body in airway | 0 (0 to 0)     | 0 (0 to 0)      | -6.7% (-17.6% to 5.4%)    |
| 12 | Micronesia (Federated States of) | Self-harm by firearm                            | 1 (1 to 2)     | 1 (1 to 2)      | -5% (-18.1% to 9.7%)      |
| 13 | Micronesia (Federated States of) | Self-harm by other specified means              | 3 (2 to 5)     | 3 (2 to 5)      | 2.9% (-4.1% to 11.4%)     |
| 14 | Micronesia (Federated States of) | Unintentional firearm injuries                  | 2 (1 to 3)     | 2 (1 to 3)      | -26.7% (-33.7% to -20.1%) |
| 15 | Monaco                           | Venomous animal contact                         | 3 (1 to 6)     | 3 (1 to 5)      | -7.8% (-12.7% to -2.1%)   |
| 16 | Monaco                           | Adverse effects of medical treatment            | 0 (0 to 0)     | 0 (0 to 0)      | 0% (0% to 0%)             |
| 17 | Monaco                           | Conflict and terrorism                          | 0 (0 to 0)     | 0 (0 to 0)      | NA                        |
| 18 | Monaco                           | Cyclist road injuries                           | 18 (11 to 27)  | 15 (10 to 23)   | -16.4% (-24.4% to -7.5%)  |
| 19 | Monaco                           | Drowning                                        | 0 (0 to 0)     | 0 (0 to 0)      | 75.9% (59.5% to 93.1%)    |
| 20 | Monaco                           | Environmental heat and cold exposure            | 0 (0 to 1)     | 0 (0 to 1)      | 2% (-3% to 6.8%)          |
| 21 | Monaco                           | Executions and police conflict                  | 0 (0 to 0)     | 0 (0 to 0)      | NA                        |
| 22 | Monaco                           | Exposure to forces of nature                    | 0 (0 to 0)     | 0 (0 to 0)      | NA                        |
| 23 | Monaco                           | Falls                                           | 96 (60 to 150) | 117 (73 to 183) | 22.5% (18.3% to 26.9%)    |
| 24 | Monaco                           | Fire, heat, and hot substances                  | 0 (0 to 1)     | 0 (0 to 1)      | 1.4% (-3.2% to 5.6%)      |
| 25 | Monaco                           | Foreign body in eyes                            | 0 (0 to 0)     | 0 (0 to 0)      | 0.3% (0% to 1%)           |
| 26 | Monaco                           | Foreign body in other body part                 | 2 (1 to 4)     | 2 (1 to 4)      | 0.9% (-3.2% to 5.4%)      |
| 27 | Monaco                           | Motor vehicle road injuries                     | 34 (23 to 48)  | 29 (20 to 42)   | -13.4% (-20.7% to -6.1%)  |
| 28 | Monaco                           | Motorcyclist road injuries                      | 18 (12 to 25)  | 17 (12 to 23)   | -5% (-13.9% to 4.6%)      |
| 29 | Monaco                           | Non-venomous animal contact                     | 1 (0 to 2)     | 1 (0 to 2)      | -9.8% (-13.7% to -4.6%)   |
| 30 | Monaco                           | Other exposure to mechanical forces             | 66 (33 to 124) | 67 (33 to 124)  | 1.4% (-3.9% to 6.7%)      |
| 31 | Monaco                           | Other road injuries                             | 2 (1 to 4)     | 2 (1 to 3)      | -16.7% (-24.2% to -8.3%)  |
| 32 | Monaco                           | Other transport injuries                        | 2 (2 to 3)     | 3 (2 to 4)      | 7.8% (3.2% to 12.9%)      |
| 33 | Monaco                           | Other unintentional injuries                    | 7 (4 to 13)    | 7 (4 to 13)     | 1.2% (-3% to 5.4%)        |
| 34 | Monaco                           | Pedestrian road injuries                        | 13 (9 to 19)   | 10 (7 to 14)    | -25% (-32.1% to -17.4%)   |
| 35 | Monaco                           | Physical violence by firearm                    | 0 (0 to 1)     | 1 (0 to 1)      | 28.5% (18.6% to 39.8%)    |
| 36 | Monaco                           | Physical violence by other means                | 12 (7 to 18)   | 12 (8 to 19)    | 5.1% (0.1% to 10.8%)      |
| 37 | Monaco                           | Physical violence by sharp object               | 1 (0 to 2)     | 1 (0 to 2)      | 4.5% (-3.5% to 13%)       |
| 38 | Monaco                           | Poisoning by carbon monoxide                    | 0 (0 to 0)     | 0 (0 to 0)      | -6.8% (-15.5% to 2.1%)    |
| 39 | Monaco                           | Poisoning by other means                        | 0 (0 to 0)     | 0 (0 to 0)      | -34.2% (-40.4% to -28.4%) |
| 40 | Monaco                           | Pulmonary aspiration and foreign body in airway | 0 (0 to 1)     | 0 (0 to 0)      | -16% (-23.1% to -8.1%)    |
| 41 | Monaco                           | Self-harm by firearm                            | 0 (0 to 0)     | 0 (0 to 0)      | 0.7% (-5.5% to 8.8%)      |
| 42 | Monaco                           | Self-harm by other specified means              | 0 (0 to 1)     | 0 (0 to 1)      | -5.9% (-11.4% to 0.3%)    |
| 43 | Monaco                           | Unintentional firearm injuries                  | 0 (0 to 1)     | 0 (0 to 1)      | 2.2% (-5% to 10.2%)       |
| 44 | Monaco                           | Venomous animal contact                         | 0 (0 to 0)     | 0 (0 to 0)      | -10.9% (-16.7% to -4.7%)  |
| 45 |                                  |                                                 |                |                 |                           |
| 46 |                                  |                                                 |                |                 |                           |

|    |            |                                                 |                  |                  |                           |
|----|------------|-------------------------------------------------|------------------|------------------|---------------------------|
| 1  |            |                                                 |                  |                  |                           |
| 2  | Mongolia   | Adverse effects of medical treatment            | 0 (0 to 0)       | 0 (0 to 0)       | 0% (0% to 0%)             |
| 3  | Mongolia   | Conflict and terrorism                          | 0 (0 to 0)       | 0 (0 to 0)       | NA                        |
| 4  | Mongolia   | Cyclist road injuries                           | 22 (13 to 27)    | 22 (14 to 31)    | 10.4% (0.6% to 19.9%)     |
| 5  | Mongolia   | Drowning                                        | 0 (0 to 1)       | 1 (0 to 1)       | 29.8% (15.3% to 47.3%)    |
| 6  | Mongolia   | Environmental heat and cold exposure            | 11 (8 to 15)     | 7 (5 to 10)      | -34.4% (-38.1% to -30.7%) |
| 7  | Mongolia   | Executions and police conflict                  | 0 (0 to 0)       | 0 (0 to 0)       | NA                        |
| 8  | Mongolia   | Exposure to forces of nature                    | 7 (4 to 12)      | 0 (0 to 0)       | NA                        |
| 9  | Mongolia   | Falls                                           | 129 (99 to 168)  | 174 (134 to 228) | 34.8% (29.5% to 40.3%)    |
| 10 | Mongolia   | Fire, heat, and hot substances                  | 3 (2 to 5)       | 4 (2 to 6)       | 10.8% (3.6% to 17.8%)     |
| 11 | Mongolia   | Foreign body in eyes                            | 0 (0 to 0)       | 0 (0 to 0)       | -0.5% (-1.1% to -0.2%)    |
| 12 | Mongolia   | Foreign body in other body part                 | 2 (1 to 4)       | 2 (1 to 4)       | 1.5% (-3.8% to 8.5%)      |
| 13 | Mongolia   | Motor vehicle road injuries                     | 47 (37 to 60)    | 74 (58 to 94)    | 56.7% (45.9% to 69.9%)    |
| 14 | Mongolia   | Motorcyclist road injuries                      | 11 (8 to 14)     | 12 (9 to 16)     | 15.8% (4.3% to 30%)       |
| 15 | Mongolia   | Non-venomous animal contact                     | 3 (2 to 5)       | 2 (1 to 4)       | -22.1% (-27.7% to -16.7%) |
| 16 | Mongolia   | Other exposure to mechanical forces             | 68 (43 to 107)   | 71 (44 to 109)   | 4.3% (-2.3% to 10.8%)     |
| 17 | Mongolia   | Other road injuries                             | 2 (1 to 4)       | 3 (2 to 5)       | 29.9% (16.8% to 46.6%)    |
| 18 | Mongolia   | Other transport injuries                        | 5 (4 to 7)       | 5 (4 to 7)       | 0.5% (-5.7% to 6.3%)      |
| 19 | Mongolia   | Other unintentional injuries                    | 19 (12 to 31)    | 20 (13 to 33)    | 6.3% (0.9% to 12.4%)      |
| 20 | Mongolia   | Pedestrian road injuries                        | 19 (14 to 24)    | 22 (17 to 29)    | 21.1% (10.6% to 33.5%)    |
| 21 | Mongolia   | Physical violence by firearm                    | 0 (0 to 0)       | 0 (0 to 0)       | 71.7% (46.5% to 99.4%)    |
| 22 | Mongolia   | Physical violence by other means                | 24 (17 to 34)    | 20 (14 to 29)    | -15.1% (-22% to -7.9%)    |
| 23 | Mongolia   | Physical violence by sharp object               | 3 (2 to 4)       | 2 (1 to 4)       | -18.8% (-28.1% to -9.1%)  |
| 24 | Mongolia   | Poisoning by carbon monoxide                    | 0 (0 to 0)       | 0 (0 to 0)       | -19% (-33% to -1.2%)      |
| 25 | Mongolia   | Poisoning by other means                        | 1 (1 to 1)       | 0 (0 to 1)       | -59.3% (-65.5% to -52.6%) |
| 26 | Mongolia   | Pulmonary aspiration and foreign body in airway | 1 (1 to 2)       | 1 (1 to 2)       | 0.5% (-6.2% to 8.6%)      |
| 27 | Mongolia   | Self-harm by firearm                            | 0 (0 to 0)       | 0 (0 to 1)       | 24% (3.7% to 46.1%)       |
| 28 | Mongolia   | Self-harm by other specified means              | 3 (2 to 5)       | 4 (3 to 6)       | 15.2% (8.5% to 22.2%)     |
| 29 | Mongolia   | Unintentional firearm injuries                  | 1 (0 to 1)       | 1 (0 to 1)       | -9% (-17.9% to 1.3%)      |
| 30 | Mongolia   | Venomous animal contact                         | 3 (1 to 5)       | 2 (1 to 4)       | -19% (-24% to -14.1%)     |
| 31 | Montenegro | Adverse effects of medical treatment            | 0 (0 to 0)       | 0 (0 to 0)       | 0% (0% to 0%)             |
| 32 | Montenegro | Conflict and terrorism                          | 0 (0 to 0)       | 0 (0 to 0)       | NA                        |
| 33 | Montenegro | Cyclist road injuries                           | 68 (50 to 91)    | 65 (47 to 87)    | -4.9% (-12.8% to 2.8%)    |
| 34 | Montenegro | Drowning                                        | 0 (0 to 0)       | 0 (0 to 1)       | 40.6% (25.1% to 57.4%)    |
| 35 | Montenegro | Environmental heat and cold exposure            | 2 (1 to 3)       | 2 (1 to 2)       | -14.7% (-19.6% to -9.6%)  |
| 36 | Montenegro | Executions and police conflict                  | 0 (0 to 0)       | 0 (0 to 0)       | NA                        |
| 37 | Montenegro | Exposure to forces of nature                    | 0 (0 to 0)       | 0 (0 to 0)       | NA                        |
| 38 | Montenegro | Falls                                           | 270 (211 to 347) | 282 (220 to 365) | 4.3% (-0.5% to 9.7%)      |
| 39 | Montenegro | Fire, heat, and hot substances                  | 5 (3 to 8)       | 4 (2 to 7)       | -11.6% (-16.9% to -6.1%)  |
| 40 | Montenegro | Foreign body in eyes                            | 0 (0 to 0)       | 0 (0 to 0)       | 0.3% (0.1% to 0.7%)       |
| 41 | Montenegro | Foreign body in other body part                 | 2 (1 to 5)       | 2 (1 to 5)       | -1.7% (-6.5% to 3.5%)     |
| 42 | Montenegro | Motor vehicle road injuries                     | 86 (66 to 110)   | 94 (72 to 120)   | 9.2% (0.8% to 19.4%)      |
| 43 | Montenegro | Motorcyclist road injuries                      | 16 (12 to 21)    | 15 (11 to 20)    | -3.9% (-14.3% to 7.6%)    |
| 44 | Montenegro | Non-venomous animal contact                     | 6 (3 to 10)      | 5 (3 to 9)       | -5.6% (-10.5% to -0.9%)   |
| 45 |            |                                                 |                  |                  |                           |
| 46 |            |                                                 |                  |                  |                           |

|    |            |                                                 |                 |                 |                           |
|----|------------|-------------------------------------------------|-----------------|-----------------|---------------------------|
| 1  |            |                                                 |                 |                 |                           |
| 2  | Montenegro | Other exposure to mechanical forces             | 134 (83 to 213) | 131 (80 to 207) | -2.3% (-7.6% to 2.6%)     |
| 3  | Montenegro | Other road injuries                             | 2 (1 to 3)      | 2 (1 to 3)      | 0.1% (-8.8% to 9.4%)      |
| 4  | Montenegro | Other transport injuries                        | 7 (5 to 9)      | 6 (4 to 8)      | -11.4% (-17.4% to -5.5%)  |
| 5  | Montenegro | Other unintentional injuries                    | 35 (22 to 56)   | 29 (18 to 48)   | -15.5% (-22% to -8.2%)    |
| 6  | Montenegro | Pedestrian road injuries                        | 48 (37 to 61)   | 43 (32 to 54)   | -11% (-18% to -3.4%)      |
| 7  | Montenegro | Physical violence by firearm                    | 0 (0 to 1)      | 1 (0 to 1)      | 11.3% (-0.2% to 25.5%)    |
| 8  | Montenegro | Physical violence by other means                | 41 (30 to 58)   | 33 (23 to 47)   | -19.5% (-25.4% to -13%)   |
| 9  | Montenegro | Physical violence by sharp object               | 2 (1 to 4)      | 2 (1 to 3)      | -6.8% (-16.3% to 3%)      |
| 10 | Montenegro | Poisoning by carbon monoxide                    | 0 (0 to 0)      | 0 (0 to 0)      | 18.2% (9.6% to 27.8%)     |
| 11 | Montenegro | Poisoning by other means                        | 0 (0 to 1)      | 0 (0 to 1)      | 1.8% (-4.9% to 9.2%)      |
| 12 | Montenegro | Pulmonary aspiration and foreign body in airway | 1 (1 to 2)      | 1 (1 to 2)      | -19% (-28.6% to -10%)     |
| 13 | Montenegro | Self-harm by firearm                            | 1 (1 to 2)      | 1 (1 to 2)      | 9.3% (-1.5% to 22.2%)     |
| 14 | Montenegro | Self-harm by other specified means              | 3 (2 to 5)      | 3 (2 to 5)      | -5% (-10.7% to 0.4%)      |
| 15 | Montenegro | Unintentional firearm injuries                  | 1 (1 to 2)      | 1 (1 to 2)      | -2.8% (-11.1% to 6.7%)    |
| 16 | Morocco    | Venomous animal contact                         | 5 (2 to 9)      | 4 (2 to 9)      | -8.1% (-13.4% to -3.3%)   |
| 17 | Morocco    | Adverse effects of medical treatment            | 0 (0 to 0)      | 0 (0 to 0)      | 0% (0% to 0%)             |
| 18 | Morocco    | Conflict and terrorism                          | 0 (0 to 0)      | 0 (0 to 0)      | NA                        |
| 19 | Morocco    | Cyclist road injuries                           | 16 (11 to 23)   | 16 (11 to 23)   | 2.5% (-7.4% to 12.9%)     |
| 20 | Morocco    | Drowning                                        | 0 (0 to 0)      | 0 (0 to 0)      | 44.5% (26.5% to 64.2%)    |
| 21 | Morocco    | Environmental heat and cold exposure            | 3 (2 to 4)      | 3 (2 to 4)      | -2% (-6.2% to 2.2%)       |
| 22 | Morocco    | Executions and police conflict                  | 0 (0 to 0)      | 0 (0 to 0)      | NA                        |
| 23 | Morocco    | Exposure to forces of nature                    | 0 (0 to 0)      | 0 (0 to 0)      | NA                        |
| 24 | Morocco    | Falls                                           | 80 (63 to 105)  | 109 (84 to 143) | 35.3% (30% to 41.3%)      |
| 25 | Morocco    | Fire, heat, and hot substances                  | 1 (1 to 2)      | 1 (0 to 1)      | -25.9% (-31.5% to -19.7%) |
| 26 | Morocco    | Foreign body in eyes                            | 0 (0 to 0)      | 0 (0 to 0)      | 0.4% (0.2% to 0.8%)       |
| 27 | Morocco    | Foreign body in other body part                 | 1 (1 to 3)      | 1 (1 to 3)      | -0.9% (-5.5% to 4.4%)     |
| 28 | Morocco    | Motor vehicle road injuries                     | 50 (39 to 63)   | 44 (35 to 56)   | -10.8% (-18.5% to -2.3%)  |
| 29 | Morocco    | Motorcyclist road injuries                      | 9 (7 to 13)     | 9 (7 to 12)     | -4.3% (-13.9% to 7%)      |
| 30 | Morocco    | Non-venomous animal contact                     | 4 (2 to 7)      | 4 (2 to 6)      | -10.8% (-15.5% to -5.8%)  |
| 31 | Morocco    | Other exposure to mechanical forces             | 33 (20 to 53)   | 30 (18 to 47)   | -9% (-14.7% to -4%)       |
| 32 | Morocco    | Other road injuries                             | 2 (1 to 3)      | 2 (1 to 4)      | 11.4% (0.6% to 23.9%)     |
| 33 | Morocco    | Other transport injuries                        | 5 (4 to 7)      | 5 (4 to 7)      | -4.9% (-10.6% to 2.3%)    |
| 34 | Morocco    | Other unintentional injuries                    | 25 (16 to 40)   | 19 (13 to 31)   | -22.2% (-26.4% to -17.8%) |
| 35 | Morocco    | Pedestrian road injuries                        | 34 (26 to 43)   | 25 (19 to 31)   | -27.7% (-34.1% to -20.9%) |
| 36 | Morocco    | Physical violence by firearm                    | 0 (0 to 0)      | 0 (0 to 1)      | 173.4% (140.1% to 214.1%) |
| 37 | Morocco    | Physical violence by other means                | 8 (6 to 12)     | 9 (6 to 13)     | 9.1% (2.6% to 16.8%)      |
| 38 | Morocco    | Physical violence by sharp object               | 1 (1 to 2)      | 1 (1 to 2)      | 9.1% (0.2% to 18.8%)      |
| 39 | Morocco    | Poisoning by carbon monoxide                    | 0 (0 to 0)      | 0 (0 to 0)      | 33.7% (17.4% to 50.3%)    |
| 40 | Morocco    | Poisoning by other means                        | 0 (0 to 0)      | 0 (0 to 0)      | -22.7% (-30.5% to -14.8%) |
| 41 | Morocco    | Pulmonary aspiration and foreign body in airway | 0 (0 to 1)      | 0 (0 to 1)      | -21.4% (-30.6% to -12.8%) |
| 42 | Morocco    | Self-harm by firearm                            | 0 (0 to 0)      | 0 (0 to 0)      | 28.9% (14.4% to 45.2%)    |
| 43 | Morocco    | Self-harm by other specified means              | 1 (1 to 2)      | 1 (1 to 2)      | 4.2% (-0.8% to 9.7%)      |
| 44 | Morocco    | Unintentional firearm injuries                  | 3 (2 to 4)      | 2 (1 to 4)      | -18.6% (-26.7% to -10.9%) |
| 45 |            |                                                 |                 |                 |                           |
| 46 |            |                                                 |                 |                 |                           |

|    |            |                                                 |                |                 |                           |
|----|------------|-------------------------------------------------|----------------|-----------------|---------------------------|
| 1  |            |                                                 |                |                 |                           |
| 2  | Morocco    | Venomous animal contact                         | 2 (1 to 5)     | 2 (1 to 4)      | -8.7% (-14.5% to -1.9%)   |
| 3  | Mozambique | Adverse effects of medical treatment            | 0 (0 to 0)     | 0 (0 to 0)      | 0% (0% to 0%)             |
| 4  | Mozambique | Conflict and terrorism                          | 70 (19 to 200) | 2 (1 to 6)      | NA                        |
| 5  | Mozambique | Cyclist road injuries                           | 39 (25 to 57)  | 47 (31 to 69)   | 21.5% (11.5% to 31.6%)    |
| 6  | Mozambique | Drowning                                        | 0 (0 to 0)     | 0 (0 to 0)      | -8.3% (-14.7% to -1.6%)   |
| 7  | Mozambique | Environmental heat and cold exposure            | 0 (0 to 1)     | 0 (0 to 1)      | 4% (-2.8% to 11.3%)       |
| 8  | Mozambique | Executions and police conflict                  | 0 (0 to 0)     | 0 (0 to 0)      | NA                        |
| 9  | Mozambique | Exposure to forces of nature                    | 0 (0 to 0)     | 5 (2 to 10)     | NA                        |
| 10 | Mozambique | Falls                                           | 26 (17 to 41)  | 34 (22 to 54)   | 30% (24.7% to 35.4%)      |
| 11 | Mozambique | Fire, heat, and hot substances                  | 0 (0 to 1)     | 0 (0 to 1)      | -5.4% (-10.4% to -0.6%)   |
| 12 | Mozambique | Foreign body in eyes                            | 0 (0 to 0)     | 0 (0 to 0)      | -0.5% (-1.4% to -0.1%)    |
| 13 | Mozambique | Foreign body in other body part                 | 3 (1 to 7)     | 3 (1 to 7)      | -4.2% (-9.6% to 2.7%)     |
| 14 | Mozambique | Motor vehicle road injuries                     | 34 (22 to 49)  | 43 (28 to 62)   | 26.2% (14.2% to 38.9%)    |
| 15 | Mozambique | Motorcyclist road injuries                      | 24 (16 to 33)  | 29 (21 to 41)   | 23.7% (14.1% to 34.8%)    |
| 16 | Mozambique | Non-venomous animal contact                     | 7 (3 to 15)    | 6 (3 to 12)     | -16.8% (-21.1% to -12%)   |
| 17 | Mozambique | Other exposure to mechanical forces             | 25 (12 to 46)  | 25 (12 to 46)   | -0.3% (-7% to 6.2%)       |
| 18 | Mozambique | Other road injuries                             | 2 (1 to 4)     | 2 (1 to 4)      | 7.1% (-1.2% to 16.6%)     |
| 19 | Mozambique | Other transport injuries                        | 3 (2 to 5)     | 3 (2 to 5)      | -2.6% (-8.5% to 4.4%)     |
| 20 | Mozambique | Other unintentional injuries                    | 3 (2 to 4)     | 2 (1 to 4)      | -8.4% (-15.1% to -2.2%)   |
| 21 | Mozambique | Pedestrian road injuries                        | 89 (66 to 116) | 103 (76 to 134) | 15.1% (8.1% to 22.8%)     |
| 22 | Mozambique | Physical violence by firearm                    | 0 (0 to 0)     | 0 (0 to 0)      | 66.3% (51.6% to 84.3%)    |
| 23 | Mozambique | Physical violence by other means                | 5 (3 to 7)     | 7 (4 to 10)     | 47% (38.2% to 56.6%)      |
| 24 | Mozambique | Physical violence by sharp object               | 1 (1 to 2)     | 2 (1 to 3)      | 36.6% (25.7% to 49%)      |
| 25 | Mozambique | Poisoning by carbon monoxide                    | 0 (0 to 0)     | 0 (0 to 0)      | 20.3% (6.4% to 37%)       |
| 26 | Mozambique | Poisoning by other means                        | 0 (0 to 0)     | 0 (0 to 0)      | -11.3% (-19.9% to -3.2%)  |
| 27 | Mozambique | Pulmonary aspiration and foreign body in airway | 0 (0 to 0)     | 0 (0 to 0)      | -15.8% (-26.7% to -4.3%)  |
| 28 | Mozambique | Self-harm by firearm                            | 0 (0 to 0)     | 0 (0 to 0)      | 91.3% (74.4% to 113.7%)   |
| 29 | Mozambique | Self-harm by other specified means              | 0 (0 to 0)     | 0 (0 to 0)      | 44.9% (35.5% to 55%)      |
| 30 | Mozambique | Unintentional firearm injuries                  | 1 (0 to 2)     | 1 (0 to 2)      | -15.8% (-23.8% to -5.9%)  |
| 31 | Mozambique | Venomous animal contact                         | 1 (0 to 3)     | 1 (0 to 3)      | -15.5% (-22.3% to -7.6%)  |
| 32 | Myanmar    | Adverse effects of medical treatment            | 0 (0 to 0)     | 0 (0 to 0)      | 0% (0% to 0%)             |
| 33 | Myanmar    | Conflict and terrorism                          | 9 (4 to 20)    | 7 (3 to 15)     | NA                        |
| 34 | Myanmar    | Cyclist road injuries                           | 17 (12 to 25)  | 13 (9 to 19)    | -23.3% (-30% to -15.7%)   |
| 35 | Myanmar    | Drowning                                        | 1 (0 to 1)     | 0 (0 to 1)      | -34% (-40% to -27.5%)     |
| 36 | Myanmar    | Environmental heat and cold exposure            | 1 (1 to 2)     | 2 (1 to 2)      | 3.7% (-2.4% to 8.8%)      |
| 37 | Myanmar    | Executions and police conflict                  | 0 (0 to 0)     | 1 (0 to 1)      | NA                        |
| 38 | Myanmar    | Exposure to forces of nature                    | 0 (0 to 0)     | 0 (0 to 0)      | NA                        |
| 39 | Myanmar    | Falls                                           | 87 (69 to 111) | 115 (91 to 144) | 31.6% (26.3% to 36.9%)    |
| 40 | Myanmar    | Fire, heat, and hot substances                  | 1 (1 to 2)     | 1 (1 to 2)      | -3.9% (-11.5% to 2.2%)    |
| 41 | Myanmar    | Foreign body in eyes                            | 0 (0 to 0)     | 0 (0 to 0)      | -1.5% (-2.3% to -0.9%)    |
| 42 | Myanmar    | Foreign body in other body part                 | 1 (0 to 2)     | 1 (0 to 2)      | -6% (-11.5% to -1.1%)     |
| 43 | Myanmar    | Motor vehicle road injuries                     | 24 (18 to 32)  | 17 (12 to 23)   | -30.2% (-36.5% to -23.4%) |
| 44 | Myanmar    | Motorcyclist road injuries                      | 42 (33 to 53)  | 34 (26 to 43)   | -18.8% (-25.8% to -10.8%) |
| 45 |            |                                                 |                |                 |                           |
| 46 |            |                                                 |                |                 |                           |

|    |         |                                                 |               |               |                           |
|----|---------|-------------------------------------------------|---------------|---------------|---------------------------|
| 1  |         |                                                 |               |               |                           |
| 2  | Myanmar | Non-venomous animal contact                     | 8 (5 to 14)   | 5 (3 to 8)    | -44.6% (-48.5% to -40.7%) |
| 3  | Myanmar | Other exposure to mechanical forces             | 24 (15 to 39) | 20 (12 to 32) | -17.2% (-22.8% to -11.7%) |
| 4  | Myanmar | Other road injuries                             | 1 (1 to 2)    | 1 (0 to 1)    | -15.1% (-23.7% to -5.1%)  |
| 5  | Myanmar | Other transport injuries                        | 5 (4 to 6)    | 4 (3 to 6)    | -11.6% (-21.4% to -2.1%)  |
| 6  | Myanmar | Other unintentional injuries                    | 14 (9 to 23)  | 10 (6 to 17)  | -26.6% (-32.3% to -20.5%) |
| 7  | Myanmar | Pedestrian road injuries                        | 18 (13 to 23) | 10 (8 to 13)  | -44.5% (-49.1% to -39.5%) |
| 8  | Myanmar | Physical violence by firearm                    | 0 (0 to 0)    | 0 (0 to 0)    | -11.1% (-28% to 7.5%)     |
| 9  | Myanmar | Physical violence by other means                | 16 (11 to 22) | 10 (7 to 15)  | -35.7% (-42.6% to -28.9%) |
| 10 | Myanmar | Physical violence by sharp object               | 3 (2 to 5)    | 2 (1 to 3)    | -45.6% (-53.9% to -38.1%) |
| 11 | Myanmar | Poisoning by carbon monoxide                    | 0 (0 to 0)    | 0 (0 to 0)    | -0.2% (-12.8% to 15.6%)   |
| 12 | Myanmar | Poisoning by other means                        | 0 (0 to 0)    | 0 (0 to 0)    | -46.6% (-53% to -40.4%)   |
| 13 | Myanmar | Pulmonary aspiration and foreign body in airway | 0 (0 to 0)    | 0 (0 to 0)    | -41.6% (-47.8% to -34.6%) |
| 14 | Myanmar | Self-harm by firearm                            | 0 (0 to 0)    | 0 (0 to 0)    | -10.1% (-26.2% to 8.6%)   |
| 15 | Myanmar | Self-harm by other specified means              | 1 (1 to 2)    | 1 (1 to 1)    | -26% (-30.5% to -21.4%)   |
| 16 | Myanmar | Unintentional firearm injuries                  | 3 (2 to 4)    | 2 (1 to 3)    | -29.4% (-37.7% to -21.4%) |
| 17 | Myanmar | Venomous animal contact                         | 3 (1 to 6)    | 1 (0 to 3)    | -54.8% (-60.8% to -49.3%) |
| 18 | Namibia | Adverse effects of medical treatment            | 0 (0 to 0)    | 0 (0 to 0)    | 0% (0% to 0%)             |
| 19 | Namibia | Conflict and terrorism                          | 0 (0 to 0)    | 0 (0 to 0)    | NA                        |
| 20 | Namibia | Cyclist road injuries                           | 11 (7 to 17)  | 15 (9 to 24)  | 41% (30.7% to 52.7%)      |
| 21 | Namibia | Drowning                                        | 0 (0 to 0)    | 0 (0 to 0)    | -1.4% (-10.9% to 12.7%)   |
| 22 | Namibia | Environmental heat and cold exposure            | 0 (0 to 1)    | 0 (0 to 1)    | -11.5% (-17.6% to -5.7%)  |
| 23 | Namibia | Executions and police conflict                  | 0 (0 to 0)    | 0 (0 to 0)    | NA                        |
| 24 | Namibia | Exposure to forces of nature                    | 0 (0 to 0)    | 0 (0 to 0)    | NA                        |
| 25 | Namibia | Falls                                           | 18 (12 to 28) | 23 (15 to 35) | 25.9% (21.2% to 31%)      |
| 26 | Namibia | Fire, heat, and hot substances                  | 0 (0 to 0)    | 0 (0 to 0)    | -16.7% (-22.3% to -11.1%) |
| 27 | Namibia | Foreign body in eyes                            | 0 (0 to 0)    | 0 (0 to 0)    | -0.7% (-1.5% to -0.1%)    |
| 28 | Namibia | Foreign body in other body part                 | 4 (2 to 9)    | 4 (2 to 9)    | -3.1% (-8.5% to 2.8%)     |
| 29 | Namibia | Motor vehicle road injuries                     | 41 (28 to 57) | 44 (31 to 61) | 9% (1.2% to 17.8%)        |
| 30 | Namibia | Motorcyclist road injuries                      | 9 (6 to 12)   | 11 (7 to 15)  | 23.8% (12.7% to 35.5%)    |
| 31 | Namibia | Non-venomous animal contact                     | 3 (2 to 7)    | 3 (1 to 6)    | -19% (-23.9% to -13.8%)   |
| 32 | Namibia | Other exposure to mechanical forces             | 32 (16 to 58) | 27 (14 to 49) | -14.5% (-20.3% to -8.3%)  |
| 33 | Namibia | Other road injuries                             | 1 (1 to 3)    | 2 (1 to 3)    | 34.8% (22.3% to 49.9%)    |
| 34 | Namibia | Other transport injuries                        | 3 (2 to 5)    | 3 (2 to 5)    | -0.8% (-8.8% to 6.4%)     |
| 35 | Namibia | Other unintentional injuries                    | 3 (2 to 5)    | 2 (1 to 4)    | -13.6% (-19.5% to -8.4%)  |
| 36 | Namibia | Pedestrian road injuries                        | 50 (36 to 64) | 49 (36 to 64) | -1.5% (-7.8% to 5.4%)     |
| 37 | Namibia | Physical violence by firearm                    | 0 (0 to 1)    | 0 (0 to 1)    | 15.3% (-0.1% to 36.7%)    |
| 38 | Namibia | Physical violence by other means                | 17 (11 to 27) | 18 (11 to 27) | 1.5% (-5.4% to 8.4%)      |
| 39 | Namibia | Physical violence by sharp object               | 5 (3 to 10)   | 6 (3 to 10)   | 5% (-4.8% to 15.2%)       |
| 40 | Namibia | Poisoning by carbon monoxide                    | 0 (0 to 0)    | 0 (0 to 0)    | 23.1% (10.3% to 36.2%)    |
| 41 | Namibia | Poisoning by other means                        | 0 (0 to 0)    | 0 (0 to 0)    | -18.4% (-26.9% to -9%)    |
| 42 | Namibia | Pulmonary aspiration and foreign body in airway | 0 (0 to 0)    | 0 (0 to 0)    | -3.4% (-11.4% to 4.8%)    |
| 43 | Namibia | Self-harm by firearm                            | 0 (0 to 0)    | 0 (0 to 0)    | 48.1% (35.7% to 63.9%)    |
| 44 | Namibia | Self-harm by other specified means              | 0 (0 to 0)    | 0 (0 to 0)    | 26% (16.8% to 34.7%)      |
| 45 |         |                                                 |               |               |                           |
| 46 |         |                                                 |               |               |                           |



|    |         |                                                 |                 |                  |                           |
|----|---------|-------------------------------------------------|-----------------|------------------|---------------------------|
| 1  |         |                                                 |                 |                  |                           |
| 2  | Namibia | Unintentional firearm injuries                  | 1 (0 to 1)      | 0 (0 to 1)       | -13% (-22.9% to -0.3%)    |
| 3  | Namibia | Venomous animal contact                         | 0 (0 to 1)      | 0 (0 to 1)       | -20.9% (-30.3% to -11.6%) |
| 4  | Nauru   | Adverse effects of medical treatment            | 0 (0 to 0)      | 0 (0 to 0)       | 0% (0% to 0%)             |
| 5  | Nauru   | Conflict and terrorism                          | 0 (0 to 0)      | 0 (0 to 0)       | NA                        |
| 6  | Nauru   | Cyclist road injuries                           | 10 (6 to 15)    | 10 (6 to 15)     | 2.9% (-3% to 10.3%)       |
| 7  | Nauru   | Drowning                                        | 0 (0 to 0)      | 0 (0 to 0)       | 23.3% (13.2% to 34.1%)    |
| 8  | Nauru   | Environmental heat and cold exposure            | 0 (0 to 1)      | 0 (0 to 1)       | -4.2% (-9.3% to 1%)       |
| 9  | Nauru   | Executions and police conflict                  | 0 (0 to 0)      | 0 (0 to 0)       | NA                        |
| 10 | Nauru   | Exposure to forces of nature                    | 0 (0 to 0)      | 0 (0 to 0)       | NA                        |
| 11 | Nauru   | Falls                                           | 27 (17 to 42)   | 38 (24 to 59)    | 43.5% (38.4% to 48.7%)    |
| 12 | Nauru   | Fire, heat, and hot substances                  | 0 (0 to 0)      | 0 (0 to 0)       | -2.2% (-7% to 3%)         |
| 13 | Nauru   | Foreign body in eyes                            | 0 (0 to 0)      | 0 (0 to 0)       | -2% (-4% to -0.6%)        |
| 14 | Nauru   | Foreign body in other body part                 | 1 (0 to 2)      | 1 (0 to 2)       | -2.1% (-6.9% to 3.2%)     |
| 15 | Nauru   | Motor vehicle road injuries                     | 40 (28 to 56)   | 36 (25 to 51)    | -10.5% (-16.2% to -4.7%)  |
| 16 | Nauru   | Motorcyclist road injuries                      | 31 (23 to 42)   | 30 (22 to 41)    | -3% (-9.7% to 3.7%)       |
| 17 | Nauru   | Non-venomous animal contact                     | 2 (1 to 4)      | 2 (1 to 4)       | 3.7% (-1.1% to 8.5%)      |
| 18 | Nauru   | Other exposure to mechanical forces             | 20 (10 to 38)   | 18 (9 to 33)     | -13.2% (-17.4% to -8.6%)  |
| 19 | Nauru   | Other road injuries                             | 2 (1 to 4)      | 2 (1 to 4)       | -1.1% (-8.8% to 7.6%)     |
| 20 | Nauru   | Other transport injuries                        | 3 (2 to 5)      | 3 (2 to 5)       | -3.3% (-8.3% to 1.5%)     |
| 21 | Nauru   | Other unintentional injuries                    | 2 (1 to 3)      | 2 (1 to 3)       | 1.7% (-3% to 6.8%)        |
| 22 | Nauru   | Pedestrian road injuries                        | 20 (14 to 28)   | 20 (14 to 29)    | 1.2% (-6.1% to 9.1%)      |
| 23 | Nauru   | Physical violence by firearm                    | 0 (0 to 0)      | 0 (0 to 0)       | 2.3% (-8.3% to 13.3%)     |
| 24 | Nauru   | Physical violence by other means                | 31 (21 to 48)   | 31 (20 to 47)    | -1.7% (-6.8% to 3.5%)     |
| 25 | Nauru   | Physical violence by sharp object               | 2 (1 to 5)      | 2 (1 to 4)       | -14.5% (-22.3% to -6.1%)  |
| 26 | Nauru   | Poisoning by carbon monoxide                    | 0 (0 to 0)      | 0 (0 to 0)       | 5% (-4.9% to 16.2%)       |
| 27 | Nauru   | Poisoning by other means                        | 0 (0 to 0)      | 0 (0 to 0)       | -18.3% (-25.5% to -10.8%) |
| 28 | Nauru   | Pulmonary aspiration and foreign body in airway | 0 (0 to 0)      | 0 (0 to 0)       | 5.8% (-5.4% to 17.3%)     |
| 29 | Nauru   | Self-harm by firearm                            | 0 (0 to 0)      | 0 (0 to 0)       | -2.2% (-9.7% to 6%)       |
| 30 | Nauru   | Self-harm by other specified means              | 0 (0 to 1)      | 0 (0 to 1)       | 0.8% (-6.2% to 8.1%)      |
| 31 | Nauru   | Unintentional firearm injuries                  | 1 (0 to 2)      | 1 (0 to 2)       | -15.2% (-23.8% to -7.4%)  |
| 32 | Nauru   | Venomous animal contact                         | 1 (0 to 1)      | 1 (0 to 2)       | 5.9% (-1.3% to 14.5%)     |
| 33 | Nepal   | Adverse effects of medical treatment            | 0 (0 to 0)      | 0 (0 to 0)       | 0% (0% to 0%)             |
| 34 | Nepal   | Conflict and terrorism                          | 0 (0 to 1)      | 0 (0 to 1)       | NA                        |
| 35 | Nepal   | Cyclist road injuries                           | 58 (44 to 74)   | 57 (43 to 75)    | -1.2% (-8.6% to 6%)       |
| 36 | Nepal   | Drowning                                        | 0 (0 to 1)      | 0 (0 to 1)       | -10.7% (-20.6% to -0.3%)  |
| 37 | Nepal   | Environmental heat and cold exposure            | 3 (2 to 4)      | 3 (2 to 4)       | -11% (-16.6% to -5%)      |
| 38 | Nepal   | Executions and police conflict                  | 0 (0 to 0)      | 0 (0 to 0)       | NA                        |
| 39 | Nepal   | Exposure to forces of nature                    | 1 (1 to 1)      | 0 (0 to 0)       | NA                        |
| 40 | Nepal   | Falls                                           | 119 (93 to 154) | 143 (113 to 185) | 20.5% (16.6% to 24.9%)    |
| 41 | Nepal   | Fire, heat, and hot substances                  | 0 (0 to 1)      | 1 (0 to 1)       | 10.8% (3.4% to 19.4%)     |
| 42 | Nepal   | Foreign body in eyes                            | 0 (0 to 0)      | 0 (0 to 0)       | -1.9% (-3.4% to -0.9%)    |
| 43 | Nepal   | Foreign body in other body part                 | 1 (1 to 2)      | 1 (1 to 2)       | -5.6% (-10.3% to -0.1%)   |
| 44 | Nepal   | Motor vehicle road injuries                     | 24 (18 to 31)   | 28 (21 to 37)    | 16.5% (6.3% to 26%)       |
| 45 |         |                                                 |                 |                  |                           |
| 46 |         |                                                 |                 |                  |                           |

|    |             |                                                 |                  |                  |                           |
|----|-------------|-------------------------------------------------|------------------|------------------|---------------------------|
| 1  |             |                                                 |                  |                  |                           |
| 2  | Nepal       | Motorcyclist road injuries                      | 27 (21 to 36)    | 32 (25 to 42)    | 19.5% (9.4% to 29.7%)     |
| 3  | Nepal       | Non-venomous animal contact                     | 14 (8 to 25)     | 12 (7 to 21)     | -14.6% (-20.1% to -8.6%)  |
| 4  | Nepal       | Other exposure to mechanical forces             | 10 (6 to 17)     | 11 (6 to 18)     | 3.3% (-2.6% to 8.8%)      |
| 5  | Nepal       | Other road injuries                             | 1 (1 to 2)       | 1 (1 to 2)       | 4.8% (-3.6% to 13.9%)     |
| 6  | Nepal       | Other transport injuries                        | 6 (5 to 8)       | 6 (5 to 8)       | 3.1% (-3.7% to 10.6%)     |
| 7  | Nepal       | Other unintentional injuries                    | 16 (10 to 25)    | 13 (8 to 21)     | -18.6% (-22.9% to -14.1%) |
| 8  | Nepal       | Pedestrian road injuries                        | 23 (18 to 30)    | 23 (17 to 29)    | -1.4% (-8.6% to 5.9%)     |
| 9  | Nepal       | Physical violence by firearm                    | 0 (0 to 0)       | 0 (0 to 0)       | 61.3% (37% to 90.9%)      |
| 10 | Nepal       | Physical violence by other means                | 23 (17 to 32)    | 28 (20 to 39)    | 20.5% (13.8% to 27.6%)    |
| 11 | Nepal       | Physical violence by sharp object               | 1 (0 to 1)       | 1 (1 to 2)       | 8.2% (-0.8% to 18.1%)     |
| 12 | Nepal       | Poisoning by carbon monoxide                    | 0 (0 to 0)       | 0 (0 to 0)       | -7.6% (-19.7% to 5%)      |
| 13 | Nepal       | Poisoning by other means                        | 0 (0 to 0)       | 0 (0 to 0)       | -33% (-39.9% to -25.2%)   |
| 14 | Nepal       | Pulmonary aspiration and foreign body in airway | 1 (0 to 1)       | 0 (0 to 1)       | -26% (-32.9% to -18.7%)   |
| 15 | Nepal       | Self-harm by firearm                            | 0 (0 to 1)       | 0 (0 to 1)       | 14.5% (-1.3% to 33.6%)    |
| 16 | Nepal       | Self-harm by other specified means              | 2 (1 to 3)       | 2 (1 to 3)       | 4% (-2.7% to 10.9%)       |
| 17 | Nepal       | Unintentional firearm injuries                  | 1 (0 to 1)       | 1 (0 to 1)       | -10.8% (-17.8% to -3.3%)  |
| 18 | Nepal       | Venomous animal contact                         | 6 (2 to 13)      | 6 (2 to 12)      | -7% (-15.2% to 1.7%)      |
| 19 | Netherlands | Adverse effects of medical treatment            | 0 (0 to 0)       | 0 (0 to 0)       | 0% (0% to 0%)             |
| 20 | Netherlands | Conflict and terrorism                          | 0 (0 to 0)       | 0 (0 to 0)       | NA                        |
| 21 | Netherlands | Cyclist road injuries                           | 37 (28 to 48)    | 20 (15 to 27)    | -45.3% (-53.4% to -36.4%) |
| 22 | Netherlands | Drowning                                        | 0 (0 to 0)       | 0 (0 to 0)       | 57.7% (41.4% to 75.7%)    |
| 23 | Netherlands | Environmental heat and cold exposure            | 2 (1 to 3)       | 2 (1 to 3)       | -3.1% (-7.6% to 1.3%)     |
| 24 | Netherlands | Executions and police conflict                  | 0 (0 to 0)       | 0 (0 to 0)       | NA                        |
| 25 | Netherlands | Exposure to forces of nature                    | 0 (0 to 0)       | 0 (0 to 0)       | NA                        |
| 26 | Netherlands | Falls                                           | 190 (150 to 240) | 270 (215 to 337) | 41.5% (35.4% to 48.3%)    |
| 27 | Netherlands | Fire, heat, and hot substances                  | 2 (1 to 4)       | 2 (1 to 4)       | -0.6% (-5.1% to 3.8%)     |
| 28 | Netherlands | Foreign body in eyes                            | 0 (0 to 0)       | 0 (0 to 0)       | 0.3% (0% to 1%)           |
| 29 | Netherlands | Foreign body in other body part                 | 2 (1 to 4)       | 2 (1 to 4)       | 1.6% (-2.6% to 8.7%)      |
| 30 | Netherlands | Motor vehicle road injuries                     | 26 (20 to 34)    | 18 (13 to 23)    | -33.3% (-43.5% to -21.5%) |
| 31 | Netherlands | Motorcyclist road injuries                      | 13 (9 to 16)     | 8 (6 to 11)      | -34.3% (-46.8% to -19.8%) |
| 32 | Netherlands | Non-venomous animal contact                     | 2 (1 to 3)       | 2 (1 to 3)       | -11.2% (-15.2% to -6.5%)  |
| 33 | Netherlands | Other exposure to mechanical forces             | 43 (26 to 69)    | 42 (25 to 67)    | -2.6% (-8.7% to 3.1%)     |
| 34 | Netherlands | Other road injuries                             | 1 (1 to 2)       | 1 (1 to 2)       | -4.1% (-19% to 13.2%)     |
| 35 | Netherlands | Other transport injuries                        | 4 (3 to 5)       | 4 (3 to 5)       | 3.6% (-1.6% to 9%)        |
| 36 | Netherlands | Other unintentional injuries                    | 22 (14 to 36)    | 21 (14 to 35)    | -3.6% (-8.2% to 1.7%)     |
| 37 | Netherlands | Pedestrian road injuries                        | 6 (5 to 8)       | 6 (4 to 8)       | -5.1% (-18.8% to 11.4%)   |
| 38 | Netherlands | Physical violence by firearm                    | 1 (0 to 1)       | 1 (0 to 1)       | 15.5% (4.4% to 27.6%)     |
| 39 | Netherlands | Physical violence by other means                | 13 (9 to 19)     | 12 (8 to 17)     | -11.8% (-18.5% to -4.7%)  |
| 40 | Netherlands | Physical violence by sharp object               | 2 (1 to 3)       | 1 (1 to 2)       | -26% (-35% to -17.3%)     |
| 41 | Netherlands | Poisoning by carbon monoxide                    | 0 (0 to 0)       | 0 (0 to 0)       | 10.3% (1.9% to 19%)       |
| 42 | Netherlands | Poisoning by other means                        | 0 (0 to 0)       | 0 (0 to 0)       | -5.3% (-11.4% to 1.1%)    |
| 43 | Netherlands | Pulmonary aspiration and foreign body in airway | 1 (1 to 2)       | 1 (1 to 2)       | -9% (-16.7% to -2.3%)     |
| 44 | Netherlands | Self-harm by firearm                            | 0 (0 to 0)       | 0 (0 to 0)       | 15.8% (2.5% to 32.2%)     |
| 45 |             |                                                 |                  |                  |                           |
| 46 |             |                                                 |                  |                  |                           |

|    |             |                                                 |                  |                  |                           |
|----|-------------|-------------------------------------------------|------------------|------------------|---------------------------|
| 1  |             |                                                 |                  |                  |                           |
| 2  | Netherlands | Self-harm by other specified means              | 3 (2 to 5)       | 3 (2 to 4)       | -8.1% (-12.3% to -3.1%)   |
| 3  | Netherlands | Unintentional firearm injuries                  | 1 (1 to 2)       | 1 (1 to 2)       | 5.4% (-3% to 14.4%)       |
| 4  | Netherlands | Venomous animal contact                         | 1 (0 to 2)       | 1 (0 to 2)       | -10.9% (-16.1% to -5.5%)  |
| 5  | New Zealand | Adverse effects of medical treatment            | 0 (0 to 0)       | 0 (0 to 0)       | 0% (0% to 0%)             |
| 6  | New Zealand | Conflict and terrorism                          | 0 (0 to 0)       | 0 (0 to 0)       | NA                        |
| 7  | New Zealand | Cyclist road injuries                           | 14 (10 to 21)    | 11 (8 to 15)     | -24.6% (-34.4% to -13.2%) |
| 8  | New Zealand | Drowning                                        | 0 (0 to 1)       | 0 (0 to 0)       | -34.8% (-40.6% to -28.8%) |
| 9  | New Zealand | Environmental heat and cold exposure            | 3 (2 to 4)       | 2 (1 to 2)       | -38.7% (-46.1% to -29.8%) |
| 10 | New Zealand | Executions and police conflict                  | 0 (0 to 0)       | 0 (0 to 0)       | NA                        |
| 11 | New Zealand | Exposure to forces of nature                    | 0 (0 to 0)       | 0 (0 to 0)       | NA                        |
| 12 | New Zealand | Falls                                           | 307 (236 to 397) | 372 (291 to 482) | 21.2% (14% to 29.4%)      |
| 13 | New Zealand | Fire, heat, and hot substances                  | 4 (3 to 7)       | 4 (2 to 6)       | -14.2% (-19.9% to -5.4%)  |
| 14 | New Zealand | Foreign body in eyes                            | 0 (0 to 0)       | 0 (0 to 0)       | -0.1% (-0.6% to 0.3%)     |
| 15 | New Zealand | Foreign body in other body part                 | 7 (3 to 13)      | 7 (3 to 13)      | -1.5% (-10.7% to 9%)      |
| 16 | New Zealand | Motor vehicle road injuries                     | 64 (47 to 84)    | 56 (44 to 69)    | -12.6% (-22.3% to 0.8%)   |
| 17 | New Zealand | Motorcyclist road injuries                      | 19 (13 to 26)    | 14 (11 to 18)    | -26.8% (-39.2% to -12.9%) |
| 18 | New Zealand | Non-venomous animal contact                     | 17 (9 to 29)     | 14 (8 to 23)     | -17.4% (-31.3% to -1.5%)  |
| 19 | New Zealand | Other exposure to mechanical forces             | 220 (137 to 352) | 200 (124 to 316) | -9.4% (-16.2% to -0.8%)   |
| 20 | New Zealand | Other road injuries                             | 5 (3 to 8)       | 3 (2 to 5)       | -33.5% (-42.7% to -22.3%) |
| 21 | New Zealand | Other transport injuries                        | 10 (7 to 13)     | 7 (6 to 9)       | -24.5% (-36.1% to -12%)   |
| 22 | New Zealand | Other unintentional injuries                    | 71 (45 to 115)   | 66 (43 to 104)   | -7.1% (-15% to 1.5%)      |
| 23 | New Zealand | Pedestrian road injuries                        | 12 (8 to 16)     | 10 (7 to 12)     | -16.4% (-26.9% to -4.3%)  |
| 24 | New Zealand | Physical violence by firearm                    | 0 (0 to 1)       | 0 (0 to 1)       | -15.3% (-26.4% to -3%)    |
| 25 | New Zealand | Physical violence by other means                | 43 (29 to 63)    | 43 (30 to 60)    | -0.7% (-8.9% to 9.8%)     |
| 26 | New Zealand | Physical violence by sharp object               | 3 (2 to 5)       | 2 (1 to 3)       | -37.5% (-45.5% to -27%)   |
| 27 | New Zealand | Poisoning by carbon monoxide                    | 0 (0 to 0)       | 0 (0 to 0)       | -9.2% (-24.6% to 12.1%)   |
| 28 | New Zealand | Poisoning by other means                        | 0 (0 to 0)       | 0 (0 to 0)       | -22.7% (-30.4% to -13%)   |
| 29 | New Zealand | Pulmonary aspiration and foreign body in airway | 2 (1 to 4)       | 3 (2 to 4)       | 11.5% (0.5% to 25.9%)     |
| 30 | New Zealand | Self-harm by firearm                            | 0 (0 to 0)       | 0 (0 to 0)       | -76.2% (-80.5% to -70.8%) |
| 31 | New Zealand | Self-harm by other specified means              | 5 (3 to 8)       | 3 (2 to 6)       | -26.1% (-31.8% to -21%)   |
| 32 | New Zealand | Unintentional firearm injuries                  | 1 (1 to 2)       | 1 (0 to 1)       | -40% (-53.5% to -21.8%)   |
| 33 | New Zealand | Venomous animal contact                         | 4 (1 to 9)       | 3 (1 to 7)       | -22.7% (-39.3% to -1.8%)  |
| 34 | Nicaragua   | Adverse effects of medical treatment            | 0 (0 to 0)       | 0 (0 to 0)       | 0% (0% to 0%)             |
| 35 | Nicaragua   | Conflict and terrorism                          | 10 (4 to 22)     | 0 (0 to 0)       | NA                        |
| 36 | Nicaragua   | Cyclist road injuries                           | 21 (15 to 30)    | 18 (12 to 25)    | -16% (-25% to -6.4%)      |
| 37 | Nicaragua   | Drowning                                        | 0 (0 to 0)       | 0 (0 to 0)       | 23.6% (9.1% to 42.8%)     |
| 38 | Nicaragua   | Environmental heat and cold exposure            | 3 (2 to 4)       | 3 (2 to 4)       | 2.8% (-1.2% to 7.4%)      |
| 39 | Nicaragua   | Executions and police conflict                  | 0 (0 to 0)       | 0 (0 to 0)       | NA                        |
| 40 | Nicaragua   | Exposure to forces of nature                    | 0 (0 to 0)       | 0 (0 to 0)       | NA                        |
| 41 | Nicaragua   | Falls                                           | 72 (55 to 95)    | 91 (69 to 119)   | 26.1% (20.4% to 31.1%)    |
| 42 | Nicaragua   | Fire, heat, and hot substances                  | 3 (2 to 6)       | 3 (2 to 5)       | -2.8% (-10.2% to 4.9%)    |
| 43 | Nicaragua   | Foreign body in eyes                            | 0 (0 to 0)       | 0 (0 to 0)       | 0.2% (-0.2% to 0.7%)      |
| 44 | Nicaragua   | Foreign body in other body part                 | 1 (1 to 2)       | 1 (1 to 2)       | -1.5% (-7.2% to 3.4%)     |
| 45 |             |                                                 |                  |                  |                           |
| 46 |             |                                                 |                  |                  |                           |

|    |           |                                                 |               |               |                           |
|----|-----------|-------------------------------------------------|---------------|---------------|---------------------------|
| 1  |           |                                                 |               |               |                           |
| 2  | Nicaragua | Motor vehicle road injuries                     | 34 (26 to 43) | 29 (22 to 37) | -14.7% (-22.4% to -6.2%)  |
| 3  | Nicaragua | Motorcyclist road injuries                      | 8 (6 to 11)   | 13 (10 to 17) | 57.9% (41.3% to 76.5%)    |
| 4  | Nicaragua | Non-venomous animal contact                     | 6 (3 to 11)   | 6 (3 to 10)   | -9.2% (-14.8% to -2.9%)   |
| 5  | Nicaragua | Other exposure to mechanical forces             | 41 (24 to 67) | 37 (21 to 61) | -10% (-18.3% to -1.8%)    |
| 6  | Nicaragua | Other road injuries                             | 6 (3 to 9)    | 5 (3 to 7)    | -14% (-23.6% to -4.4%)    |
| 7  | Nicaragua | Other transport injuries                        | 4 (3 to 5)    | 4 (3 to 5)    | 0.9% (-4.9% to 7.1%)      |
| 8  | Nicaragua | Other unintentional injuries                    | 14 (9 to 22)  | 10 (6 to 17)  | -27.5% (-34.5% to -20.2%) |
| 9  | Nicaragua | Pedestrian road injuries                        | 28 (22 to 35) | 17 (13 to 22) | -37.9% (-43.7% to -31.7%) |
| 10 | Nicaragua | Physical violence by firearm                    | 1 (1 to 1)    | 1 (1 to 2)    | 65.4% (41.8% to 90.1%)    |
| 11 | Nicaragua | Physical violence by other means                | 16 (11 to 23) | 13 (9 to 20)  | -15.1% (-22.9% to -6.2%)  |
| 12 | Nicaragua | Physical violence by sharp object               | 7 (5 to 10)   | 6 (4 to 8)    | -19.2% (-29.4% to -8.1%)  |
| 13 | Nicaragua | Poisoning by carbon monoxide                    | 0 (0 to 0)    | 0 (0 to 0)    | 33.6% (18.7% to 50.9%)    |
| 14 | Nicaragua | Poisoning by other means                        | 0 (0 to 0)    | 0 (0 to 0)    | -9.7% (-17.3% to -1.1%)   |
| 15 | Nicaragua | Pulmonary aspiration and foreign body in airway | 1 (0 to 1)    | 0 (0 to 1)    | -34.7% (-43.3% to -25.5%) |
| 16 | Nicaragua | Self-harm by firearm                            | 0 (0 to 0)    | 0 (0 to 0)    | 16.3% (0% to 34.1%)       |
| 17 | Nicaragua | Self-harm by other specified means              | 1 (0 to 1)    | 1 (0 to 1)    | 6.1% (-1.5% to 14.3%)     |
| 18 | Nicaragua | Unintentional firearm injuries                  | 4 (2 to 6)    | 3 (1 to 4)    | -29.6% (-39.9% to -19.8%) |
| 19 | Nicaragua | Venomous animal contact                         | 8 (4 to 15)   | 8 (4 to 14)   | -8.4% (-13.5% to -2.5%)   |
| 20 | Niger     | Adverse effects of medical treatment            | 0 (0 to 0)    | 0 (0 to 0)    | 0% (0% to 0%)             |
| 21 | Niger     | Conflict and terrorism                          | 12 (4 to 30)  | 8 (2 to 20)   | NA                        |
| 22 | Niger     | Cyclist road injuries                           | 24 (15 to 36) | 27 (17 to 39) | 13.9% (6.5% to 21.8%)     |
| 23 | Niger     | Drowning                                        | 0 (0 to 0)    | 0 (0 to 0)    | -11.2% (-18.7% to -3.9%)  |
| 24 | Niger     | Environmental heat and cold exposure            | 0 (0 to 1)    | 0 (0 to 1)    | -0.2% (-6.4% to 5.9%)     |
| 25 | Niger     | Executions and police conflict                  | 0 (0 to 0)    | 0 (0 to 0)    | NA                        |
| 26 | Niger     | Exposure to forces of nature                    | 0 (0 to 0)    | 0 (0 to 0)    | NA                        |
| 27 | Niger     | Falls                                           | 19 (13 to 29) | 22 (14 to 33) | 12.6% (8.1% to 16.9%)     |
| 28 | Niger     | Fire, heat, and hot substances                  | 0 (0 to 0)    | 0 (0 to 0)    | -12% (-18.1% to -6%)      |
| 29 | Niger     | Foreign body in eyes                            | 0 (0 to 0)    | 0 (0 to 0)    | -0.6% (-1.6% to -0.1%)    |
| 30 | Niger     | Foreign body in other body part                 | 4 (2 to 8)    | 4 (2 to 8)    | -4.2% (-9.1% to 1.1%)     |
| 31 | Niger     | Motor vehicle road injuries                     | 43 (30 to 60) | 45 (31 to 62) | 5.2% (-1.5% to 13%)       |
| 32 | Niger     | Motorcyclist road injuries                      | 20 (14 to 28) | 19 (13 to 26) | -7.5% (-14.2% to -0.1%)   |
| 33 | Niger     | Non-venomous animal contact                     | 3 (2 to 7)    | 3 (1 to 6)    | -7.9% (-13.2% to -3.3%)   |
| 34 | Niger     | Other exposure to mechanical forces             | 25 (12 to 45) | 22 (11 to 40) | -11.3% (-16.4% to -5.1%)  |
| 35 | Niger     | Other road injuries                             | 2 (1 to 4)    | 2 (1 to 4)    | 13.2% (4% to 23.5%)       |
| 36 | Niger     | Other transport injuries                        | 4 (3 to 5)    | 3 (2 to 4)    | -16.5% (-22.5% to -11.3%) |
| 37 | Niger     | Other unintentional injuries                    | 3 (2 to 5)    | 2 (1 to 4)    | -13.9% (-18.7% to -9.5%)  |
| 38 | Niger     | Pedestrian road injuries                        | 46 (33 to 60) | 46 (33 to 60) | -0.3% (-6.8% to 6.8%)     |
| 39 | Niger     | Physical violence by firearm                    | 0 (0 to 0)    | 0 (0 to 0)    | 10.9% (-0.3% to 24.7%)    |
| 40 | Niger     | Physical violence by other means                | 9 (6 to 14)   | 9 (6 to 13)   | -4.5% (-9.5% to 0.6%)     |
| 41 | Niger     | Physical violence by sharp object               | 3 (2 to 6)    | 3 (2 to 5)    | -6.3% (-12.6% to 0.4%)    |
| 42 | Niger     | Poisoning by carbon monoxide                    | 0 (0 to 0)    | 0 (0 to 0)    | 9.8% (-2.8% to 24.2%)     |
| 43 | Niger     | Poisoning by other means                        | 0 (0 to 0)    | 0 (0 to 0)    | -19.7% (-27.3% to -10.7%) |
| 44 | Niger     | Pulmonary aspiration and foreign body in airway | 0 (0 to 0)    | 0 (0 to 0)    | -16.1% (-25.1% to -6.4%)  |
| 45 |           |                                                 |               |               |                           |
| 46 |           |                                                 |               |               |                           |

|    |         |                                                 |               |               |                           |
|----|---------|-------------------------------------------------|---------------|---------------|---------------------------|
| 1  |         |                                                 |               |               |                           |
| 2  | Niger   | Self-harm by firearm                            | 0 (0 to 0)    | 0 (0 to 0)    | 19.6% (12.8% to 28.1%)    |
| 3  | Niger   | Self-harm by other specified means              | 0 (0 to 0)    | 0 (0 to 0)    | 7% (1.7% to 12.5%)        |
| 4  | Niger   | Unintentional firearm injuries                  | 1 (0 to 2)    | 1 (0 to 2)    | -14.3% (-21.6% to -6.4%)  |
| 5  | Niger   | Venomous animal contact                         | 0 (0 to 1)    | 0 (0 to 1)    | -4.4% (-11.9% to 3.4%)    |
| 6  | Nigeria | Adverse effects of medical treatment            | 0 (0 to 0)    | 0 (0 to 0)    | 0% (0% to 0%)             |
| 7  | Nigeria | Conflict and terrorism                          | 0 (0 to 1)    | 6 (2 to 17)   | NA                        |
| 8  | Nigeria | Cyclist road injuries                           | 22 (14 to 33) | 26 (16 to 38) | 14.8% (12.1% to 17.7%)    |
| 9  | Nigeria | Drowning                                        | 0 (0 to 0)    | 0 (0 to 0)    | -11.1% (-16.3% to -6.1%)  |
| 10 | Nigeria | Environmental heat and cold exposure            | 0 (0 to 1)    | 0 (0 to 1)    | -0.9% (-3.7% to 1.6%)     |
| 11 | Nigeria | Executions and police conflict                  | 0 (0 to 0)    | 0 (0 to 1)    | NA                        |
| 12 | Nigeria | Exposure to forces of nature                    | 0 (0 to 0)    | 0 (0 to 0)    | NA                        |
| 13 | Nigeria | Falls                                           | 20 (13 to 30) | 21 (13 to 31) | 3.3% (2.3% to 4.4%)       |
| 14 | Nigeria | Fire, heat, and hot substances                  | 0 (0 to 0)    | 0 (0 to 0)    | -14.4% (-17.5% to -11.6%) |
| 15 | Nigeria | Foreign body in eyes                            | 0 (0 to 0)    | 0 (0 to 0)    | -1.8% (-4.6% to -0.1%)    |
| 16 | Nigeria | Foreign body in other body part                 | 4 (2 to 9)    | 4 (2 to 8)    | -1.7% (-2.8% to -0.4%)    |
| 17 | Nigeria | Motor vehicle road injuries                     | 39 (26 to 55) | 43 (29 to 60) | 11.1% (8.8% to 13.7%)     |
| 18 | Nigeria | Motorcyclist road injuries                      | 19 (13 to 27) | 21 (14 to 30) | 10.5% (7.9% to 13.1%)     |
| 19 | Nigeria | Non-venomous animal contact                     | 3 (1 to 6)    | 2 (1 to 5)    | -18.7% (-22.1% to -15.7%) |
| 20 | Nigeria | Other exposure to mechanical forces             | 27 (13 to 49) | 22 (11 to 41) | -17.6% (-20.8% to -14.4%) |
| 21 | Nigeria | Other road injuries                             | 2 (1 to 4)    | 2 (1 to 5)    | 14.7% (11.7% to 17.9%)    |
| 22 | Nigeria | Other transport injuries                        | 3 (2 to 4)    | 3 (2 to 4)    | -2.6% (-5.3% to 0%)       |
| 23 | Nigeria | Other unintentional injuries                    | 3 (2 to 5)    | 2 (1 to 4)    | -13.6% (-18.7% to -9.2%)  |
| 24 | Nigeria | Pedestrian road injuries                        | 41 (30 to 54) | 44 (32 to 60) | 8.9% (6.7% to 11.1%)      |
| 25 | Nigeria | Physical violence by firearm                    | 0 (0 to 1)    | 0 (0 to 1)    | 6.5% (2% to 10.9%)        |
| 26 | Nigeria | Physical violence by other means                | 9 (6 to 14)   | 9 (6 to 14)   | -0.2% (-2.2% to 1.6%)     |
| 27 | Nigeria | Physical violence by sharp object               | 3 (2 to 6)    | 3 (1 to 5)    | -4% (-6.5% to -1.9%)      |
| 28 | Nigeria | Poisoning by carbon monoxide                    | 0 (0 to 0)    | 0 (0 to 0)    | -11% (-14.9% to -7%)      |
| 29 | Nigeria | Poisoning by other means                        | 0 (0 to 0)    | 0 (0 to 0)    | -21.3% (-25.5% to -16.9%) |
| 30 | Nigeria | Pulmonary aspiration and foreign body in airway | 0 (0 to 0)    | 0 (0 to 0)    | -14.4% (-17.3% to -11.8%) |
| 31 | Nigeria | Self-harm by firearm                            | 0 (0 to 0)    | 0 (0 to 0)    | 3.8% (0.9% to 6.7%)       |
| 32 | Nigeria | Self-harm by other specified means              | 0 (0 to 0)    | 0 (0 to 0)    | -2.9% (-5.2% to -0.7%)    |
| 33 | Nigeria | Unintentional firearm injuries                  | 1 (0 to 2)    | 1 (0 to 2)    | -26.4% (-31.6% to -21.5%) |
| 34 | Nigeria | Venomous animal contact                         | 0 (0 to 1)    | 0 (0 to 1)    | -17.5% (-22.4% to -13.8%) |
| 35 | Niue    | Adverse effects of medical treatment            | 0 (0 to 0)    | 0 (0 to 0)    | 0% (0% to 0%)             |
| 36 | Niue    | Conflict and terrorism                          | 0 (0 to 0)    | 0 (0 to 0)    | NA                        |
| 37 | Niue    | Cyclist road injuries                           | 9 (5 to 14)   | 9 (5 to 14)   | 3.5% (-3.8% to 11.4%)     |
| 38 | Niue    | Drowning                                        | 0 (0 to 0)    | 0 (0 to 0)    | 37.8% (25.7% to 51.7%)    |
| 39 | Niue    | Environmental heat and cold exposure            | 0 (0 to 1)    | 0 (0 to 1)    | 0.5% (-4.8% to 5.9%)      |
| 40 | Niue    | Executions and police conflict                  | 0 (0 to 0)    | 0 (0 to 0)    | NA                        |
| 41 | Niue    | Exposure to forces of nature                    | 0 (0 to 0)    | 0 (0 to 0)    | NA                        |
| 42 | Niue    | Falls                                           | 27 (17 to 42) | 41 (26 to 64) | 52.4% (47% to 58.8%)      |
| 43 | Niue    | Fire, heat, and hot substances                  | 0 (0 to 0)    | 0 (0 to 0)    | 6.1% (1.2% to 11.3%)      |
| 44 | Niue    | Foreign body in eyes                            | 0 (0 to 0)    | 0 (0 to 0)    | 0.4% (-0.1% to 1.2%)      |
| 45 |         |                                                 |               |               |                           |
| 46 |         |                                                 |               |               |                           |

|    |                 |                                                 |                  |                  |                           |
|----|-----------------|-------------------------------------------------|------------------|------------------|---------------------------|
| 1  |                 |                                                 |                  |                  |                           |
| 2  | Niue            | Foreign body in other body part                 | 1 (0 to 2)       | 1 (0 to 2)       | -1.3% (-5.1% to 3.5%)     |
| 3  | Niue            | Motor vehicle road injuries                     | 31 (22 to 45)    | 27 (18 to 39)    | -14.1% (-20.4% to -7.7%)  |
| 4  | Niue            | Motorcyclist road injuries                      | 25 (18 to 33)    | 24 (17 to 32)    | -4% (-10.5% to 3.1%)      |
| 5  | Niue            | Non-venomous animal contact                     | 3 (1 to 5)       | 2 (1 to 4)       | -14.8% (-18.7% to -10.8%) |
| 6  | Niue            | Other exposure to mechanical forces             | 20 (10 to 37)    | 18 (9 to 33)     | -9.5% (-14.4% to -4.8%)   |
| 7  | Niue            | Other road injuries                             | 2 (1 to 4)       | 2 (1 to 4)       | 2.6% (-6.5% to 12%)       |
| 8  | Niue            | Other transport injuries                        | 3 (2 to 5)       | 3 (2 to 4)       | -7.2% (-13.7% to -1.7%)   |
| 9  | Niue            | Other unintentional injuries                    | 2 (1 to 4)       | 2 (1 to 3)       | -3.6% (-8.8% to 1%)       |
| 10 | Niue            | Pedestrian road injuries                        | 16 (11 to 23)    | 15 (10 to 21)    | -10% (-16.7% to -2.8%)    |
| 11 | Niue            | Physical violence by firearm                    | 0 (0 to 0)       | 0 (0 to 0)       | 9.1% (-2.3% to 21.2%)     |
| 12 | Niue            | Physical violence by other means                | 31 (21 to 47)    | 27 (18 to 41)    | -12.6% (-18.5% to -7.1%)  |
| 13 | Niue            | Physical violence by sharp object               | 3 (1 to 5)       | 2 (1 to 4)       | -27.3% (-36.3% to -19.1%) |
| 14 | Niue            | Poisoning by carbon monoxide                    | 0 (0 to 0)       | 0 (0 to 0)       | 11.4% (1.8% to 23.2%)     |
| 15 | Niue            | Poisoning by other means                        | 0 (0 to 0)       | 0 (0 to 0)       | -10.2% (-17.3% to -2.5%)  |
| 16 | Niue            | Pulmonary aspiration and foreign body in airway | 0 (0 to 0)       | 0 (0 to 0)       | -7.2% (-17.7% to 2.7%)    |
| 17 | Niue            | Self-harm by firearm                            | 0 (0 to 0)       | 0 (0 to 0)       | -12.4% (-20% to -4.6%)    |
| 18 | Niue            | Self-harm by other specified means              | 0 (0 to 1)       | 0 (0 to 0)       | -7.2% (-14.2% to 0.4%)    |
| 19 | Niue            | Unintentional firearm injuries                  | 1 (0 to 2)       | 1 (0 to 2)       | -10.8% (-18.8% to -2.2%)  |
| 20 | Niue            | Venomous animal contact                         | 1 (0 to 2)       | 1 (0 to 2)       | -11.1% (-17.4% to -4.4%)  |
| 21 | North Macedonia | Adverse effects of medical treatment            | 0 (0 to 0)       | 0 (0 to 0)       | 0% (0% to 0%)             |
| 22 | North Macedonia | Conflict and terrorism                          | 0 (0 to 0)       | 0 (0 to 0)       | NA                        |
| 23 | North Macedonia | Cyclist road injuries                           | 59 (42 to 78)    | 57 (40 to 76)    | -3.3% (-11.7% to 4.5%)    |
| 24 | North Macedonia | Drowning                                        | 0 (0 to 0)       | 0 (0 to 1)       | 178.1% (135.7% to 230.8%) |
| 25 | North Macedonia | Environmental heat and cold exposure            | 2 (1 to 2)       | 2 (1 to 2)       | 2.4% (-1.6% to 6.7%)      |
| 26 | North Macedonia | Executions and police conflict                  | 0 (0 to 0)       | 0 (0 to 0)       | NA                        |
| 27 | North Macedonia | Exposure to forces of nature                    | 0 (0 to 0)       | 0 (0 to 0)       | NA                        |
| 28 | North Macedonia | Falls                                           | 136 (102 to 184) | 225 (172 to 297) | 65.3% (56.5% to 75.6%)    |
| 29 | North Macedonia | Fire, heat, and hot substances                  | 3 (2 to 5)       | 3 (2 to 6)       | 5.7% (1.4% to 10%)        |
| 30 | North Macedonia | Foreign body in eyes                            | 0 (0 to 0)       | 0 (0 to 0)       | 0.5% (0.2% to 0.9%)       |
| 31 | North Macedonia | Foreign body in other body part                 | 2 (1 to 5)       | 2 (1 to 5)       | 1.6% (-4.4% to 7.6%)      |
| 32 | North Macedonia | Motor vehicle road injuries                     | 93 (72 to 118)   | 95 (74 to 122)   | 2.7% (-6% to 11%)         |
| 33 | North Macedonia | Motorcyclist road injuries                      | 9 (6 to 12)      | 11 (8 to 15)     | 24.5% (9.1% to 40.8%)     |
| 34 | North Macedonia | Non-venomous animal contact                     | 6 (3 to 11)      | 6 (3 to 10)      | -9.1% (-13.9% to -3.3%)   |
| 35 | North Macedonia | Other exposure to mechanical forces             | 130 (81 to 206)  | 137 (85 to 216)  | 4.8% (-0.3% to 9.8%)      |
| 36 | North Macedonia | Other road injuries                             | 1 (1 to 2)       | 1 (1 to 2)       | -8% (-17.5% to 0.9%)      |
| 37 | North Macedonia | Other transport injuries                        | 6 (4 to 8)       | 6 (4 to 8)       | 5.4% (-0.2% to 10.6%)     |
| 38 | North Macedonia | Other unintentional injuries                    | 90 (59 to 141)   | 34 (22 to 55)    | -62.4% (-66.5% to -57.6%) |
| 39 | North Macedonia | Pedestrian road injuries                        | 35 (27 to 45)    | 27 (21 to 36)    | -21.9% (-29.1% to -14.3%) |
| 40 | North Macedonia | Physical violence by firearm                    | 0 (0 to 0)       | 0 (0 to 1)       | 100.4% (73.9% to 127.6%)  |
| 41 | North Macedonia | Physical violence by other means                | 34 (25 to 48)    | 26 (18 to 37)    | -24.4% (-32.5% to -16.6%) |
| 42 | North Macedonia | Physical violence by sharp object               | 2 (1 to 3)       | 2 (1 to 3)       | 1.8% (-11.2% to 16.3%)    |
| 43 | North Macedonia | Poisoning by carbon monoxide                    | 0 (0 to 0)       | 0 (0 to 0)       | 35.7% (25.5% to 47.7%)    |
| 44 | North Macedonia | Poisoning by other means                        | 0 (0 to 1)       | 0 (0 to 1)       | 4.9% (-1.6% to 11.1%)     |
| 45 |                 |                                                 |                  |                  |                           |
| 46 |                 |                                                 |                  |                  |                           |

|    |                          |                                                 |                  |                  |                           |
|----|--------------------------|-------------------------------------------------|------------------|------------------|---------------------------|
| 1  |                          |                                                 |                  |                  |                           |
| 2  | North Macedonia          | Pulmonary aspiration and foreign body in airway | 1 (0 to 2)       | 1 (0 to 1)       | -10.4% (-16.8% to -2.6%)  |
| 3  | North Macedonia          | Self-harm by firearm                            | 0 (0 to 1)       | 0 (0 to 1)       | 29% (14.9% to 45.1%)      |
| 4  | North Macedonia          | Self-harm by other specified means              | 2 (1 to 3)       | 2 (1 to 3)       | -8.8% (-13.5% to -3.1%)   |
| 5  | North Macedonia          | Unintentional firearm injuries                  | 1 (1 to 2)       | 1 (1 to 2)       | -8% (-16.6% to 0.4%)      |
| 6  | North Macedonia          | Venomous animal contact                         | 5 (2 to 10)      | 5 (2 to 9)       | -10.8% (-15.5% to -5.2%)  |
| 7  | Northern Mariana Islands | Adverse effects of medical treatment            | 0 (0 to 0)       | 0 (0 to 0)       | 0% (0% to 0%)             |
| 8  | Northern Mariana Islands | Conflict and terrorism                          | 0 (0 to 0)       | 0 (0 to 0)       | NA                        |
| 9  | Northern Mariana Islands | Cyclist road injuries                           | 8 (5 to 12)      | 8 (5 to 12)      | 1.3% (-5.9% to 9.1%)      |
| 10 | Northern Mariana Islands | Drowning                                        | 0 (0 to 0)       | 0 (0 to 1)       | 24.4% (15.1% to 35.9%)    |
| 11 | Northern Mariana Islands | Environmental heat and cold exposure            | 0 (0 to 1)       | 0 (0 to 1)       | 3.9% (-3.5% to 9.8%)      |
| 12 | Northern Mariana Islands | Executions and police conflict                  | 0 (0 to 0)       | 0 (0 to 0)       | NA                        |
| 13 | Northern Mariana Islands | Exposure to forces of nature                    | 0 (0 to 0)       | 0 (0 to 0)       | NA                        |
| 14 | Northern Mariana Islands | Falls                                           | 41 (26 to 60)    | 55 (35 to 83)    | 36% (30.4% to 41.9%)      |
| 15 | Northern Mariana Islands | Fire, heat, and hot substances                  | 0 (0 to 0)       | 0 (0 to 0)       | 6.9% (0.6% to 12.5%)      |
| 16 | Northern Mariana Islands | Foreign body in eyes                            | 0 (0 to 0)       | 0 (0 to 0)       | -2.4% (-5% to -0.6%)      |
| 17 | Northern Mariana Islands | Foreign body in other body part                 | 1 (0 to 2)       | 1 (0 to 2)       | 0% (-4.7% to 5%)          |
| 18 | Northern Mariana Islands | Motor vehicle road injuries                     | 45 (32 to 63)    | 26 (18 to 37)    | -42.8% (-47.6% to -37.9%) |
| 19 | Northern Mariana Islands | Motorcyclist road injuries                      | 27 (19 to 38)    | 23 (17 to 31)    | -12.9% (-19.7% to -5.5%)  |
| 20 | Northern Mariana Islands | Non-venomous animal contact                     | 2 (1 to 3)       | 2 (1 to 4)       | 9.3% (4.5% to 14.7%)      |
| 21 | Northern Mariana Islands | Other exposure to mechanical forces             | 31 (15 to 56)    | 21 (10 to 39)    | -32.2% (-38.2% to -25.5%) |
| 22 | Northern Mariana Islands | Other road injuries                             | 2 (1 to 4)       | 2 (1 to 4)       | -4.6% (-13.7% to 5.6%)    |
| 23 | Northern Mariana Islands | Other transport injuries                        | 5 (3 to 7)       | 3 (2 to 5)       | -31.5% (-38.7% to -23.8%) |
| 24 | Northern Mariana Islands | Other unintentional injuries                    | 3 (2 to 5)       | 3 (2 to 5)       | -15.6% (-21% to -10.1%)   |
| 25 | Northern Mariana Islands | Pedestrian road injuries                        | 32 (23 to 44)    | 20 (14 to 28)    | -37.7% (-43% to -32.4%)   |
| 26 | Northern Mariana Islands | Physical violence by firearm                    | 1 (0 to 1)       | 0 (0 to 1)       | -42.2% (-51.7% to -31.5%) |
| 27 | Northern Mariana Islands | Physical violence by other means                | 40 (27 to 60)    | 36 (24 to 54)    | -11.1% (-16.2% to -4.9%)  |
| 28 | Northern Mariana Islands | Physical violence by sharp object               | 4 (2 to 7)       | 2 (1 to 4)       | -53.9% (-61.1% to -46%)   |
| 29 | Northern Mariana Islands | Poisoning by carbon monoxide                    | 0 (0 to 0)       | 0 (0 to 0)       | 13.7% (4.6% to 23.7%)     |
| 30 | Northern Mariana Islands | Poisoning by other means                        | 0 (0 to 0)       | 0 (0 to 0)       | -1.2% (-8.5% to 5.7%)     |
| 31 | Northern Mariana Islands | Pulmonary aspiration and foreign body in airway | 0 (0 to 0)       | 0 (0 to 0)       | 18.9% (3.5% to 36.6%)     |
| 32 | Northern Mariana Islands | Self-harm by firearm                            | 0 (0 to 0)       | 0 (0 to 0)       | 5.8% (-6.8% to 17.3%)     |
| 33 | Northern Mariana Islands | Self-harm by other specified means              | 0 (0 to 0)       | 0 (0 to 1)       | 39.5% (27.7% to 53.5%)    |
| 34 | Northern Mariana Islands | Unintentional firearm injuries                  | 2 (1 to 4)       | 1 (0 to 3)       | -37.6% (-46.7% to -28.4%) |
| 35 | Northern Mariana Islands | Venomous animal contact                         | 1 (0 to 1)       | 1 (0 to 2)       | 9.2% (1.1% to 17.3%)      |
| 36 | Norway                   | Adverse effects of medical treatment            | 0 (0 to 0)       | 0 (0 to 0)       | 0% (0% to 0%)             |
| 37 | Norway                   | Conflict and terrorism                          | 0 (0 to 0)       | 0 (0 to 0)       | NA                        |
| 38 | Norway                   | Cyclist road injuries                           | 16 (10 to 24)    | 12 (7 to 17)     | -27.6% (-31.2% to -23.6%) |
| 39 | Norway                   | Drowning                                        | 0 (0 to 0)       | 0 (0 to 0)       | -14.2% (-18% to -10.3%)   |
| 40 | Norway                   | Environmental heat and cold exposure            | 1 (0 to 1)       | 1 (0 to 1)       | -16.5% (-20.5% to -13.1%) |
| 41 | Norway                   | Executions and police conflict                  | 0 (0 to 0)       | 0 (0 to 0)       | NA                        |
| 42 | Norway                   | Exposure to forces of nature                    | 0 (0 to 1)       | 0 (0 to 0)       | NA                        |
| 43 | Norway                   | Falls                                           | 146 (100 to 213) | 156 (107 to 227) | 6.6% (3.6% to 9.7%)       |
| 44 | Norway                   | Fire, heat, and hot substances                  | 1 (1 to 1)       | 1 (0 to 1)       | -27% (-31% to -23.5%)     |
| 45 |                          |                                                 |                  |                  |                           |
| 46 |                          |                                                 |                  |                  |                           |

|    |        |                                                 |                 |                  |                           |
|----|--------|-------------------------------------------------|-----------------|------------------|---------------------------|
| 1  |        |                                                 |                 |                  |                           |
| 2  | Norway | Foreign body in eyes                            | 0 (0 to 0)      | 0 (0 to 0)       | -1.6% (-2.7% to -0.4%)    |
| 3  | Norway | Foreign body in other body part                 | 2 (1 to 5)      | 2 (1 to 5)       | 1.6% (0.4% to 2.9%)       |
| 4  | Norway | Motor vehicle road injuries                     | 28 (18 to 40)   | 16 (11 to 23)    | -41.4% (-45.1% to -37.6%) |
| 5  | Norway | Motorcyclist road injuries                      | 18 (13 to 25)   | 10 (7 to 14)     | -46.4% (-49.6% to -43.4%) |
| 6  | Norway | Non-venomous animal contact                     | 2 (1 to 3)      | 2 (1 to 3)       | -9.3% (-10.8% to -7.9%)   |
| 7  | Norway | Other exposure to mechanical forces             | 86 (43 to 158)  | 69 (35 to 126)   | -19.7% (-24.3% to -15.4%) |
| 8  | Norway | Other road injuries                             | 3 (2 to 6)      | 1 (1 to 3)       | -58.6% (-64% to -53.3%)   |
| 9  | Norway | Other transport injuries                        | 6 (4 to 9)      | 3 (2 to 4)       | -48.8% (-51.6% to -45.9%) |
| 10 | Norway | Other unintentional injuries                    | 10 (6 to 17)    | 9 (5 to 17)      | -4.6% (-8.2% to -1.4%)    |
| 11 | Norway | Pedestrian road injuries                        | 9 (6 to 13)     | 5 (3 to 8)       | -38% (-43% to -32.5%)     |
| 12 | Norway | Physical violence by firearm                    | 0 (0 to 1)      | 1 (0 to 1)       | 28.3% (20.1% to 37.6%)    |
| 13 | Norway | Physical violence by other means                | 16 (10 to 24)   | 13 (8 to 20)     | -19.5% (-24% to -15.5%)   |
| 14 | Norway | Physical violence by sharp object               | 2 (1 to 3)      | 1 (1 to 3)       | -20.2% (-27.4% to -13.4%) |
| 15 | Norway | Poisoning by carbon monoxide                    | 0 (0 to 0)      | 0 (0 to 0)       | -1.1% (-5.1% to 2.2%)     |
| 16 | Norway | Poisoning by other means                        | 0 (0 to 0)      | 0 (0 to 0)       | 17% (13.2% to 20.4%)      |
| 17 | Norway | Pulmonary aspiration and foreign body in airway | 0 (0 to 1)      | 0 (0 to 1)       | -11.5% (-15.5% to -8.3%)  |
| 18 | Norway | Self-harm by firearm                            | 0 (0 to 1)      | 0 (0 to 0)       | -46.9% (-53% to -41%)     |
| 19 | Norway | Self-harm by other specified means              | 1 (0 to 1)      | 1 (0 to 1)       | -20.1% (-23.7% to -15.8%) |
| 20 | Norway | Unintentional firearm injuries                  | 1 (0 to 1)      | 1 (0 to 1)       | -2.6% (-7.5% to 2%)       |
| 21 | Norway | Venomous animal contact                         | 0 (0 to 1)      | 0 (0 to 1)       | -9.6% (-12.3% to -7.1%)   |
| 22 | Oman   | Adverse effects of medical treatment            | 0 (0 to 0)      | 0 (0 to 0)       | 0% (0% to 0%)             |
| 23 | Oman   | Conflict and terrorism                          | 0 (0 to 0)      | 0 (0 to 0)       | NA                        |
| 24 | Oman   | Cyclist road injuries                           | 25 (16 to 35)   | 20 (13 to 28)    | -20% (-28.6% to -9.8%)    |
| 25 | Oman   | Drowning                                        | 0 (0 to 0)      | 0 (0 to 1)       | 49.8% (30% to 72.7%)      |
| 26 | Oman   | Environmental heat and cold exposure            | 4 (3 to 6)      | 4 (3 to 5)       | -5.3% (-10.6% to 0%)      |
| 27 | Oman   | Executions and police conflict                  | 0 (0 to 0)      | 0 (0 to 0)       | NA                        |
| 28 | Oman   | Exposure to forces of nature                    | 0 (0 to 0)      | 0 (0 to 0)       | NA                        |
| 29 | Oman   | Falls                                           | 118 (93 to 150) | 149 (117 to 189) | 26.3% (20.9% to 31.6%)    |
| 30 | Oman   | Fire, heat, and hot substances                  | 1 (0 to 1)      | 1 (0 to 1)       | 5.3% (-3.1% to 13.7%)     |
| 31 | Oman   | Foreign body in eyes                            | 0 (0 to 0)      | 0 (0 to 0)       | 1.6% (0.7% to 2.8%)       |
| 32 | Oman   | Foreign body in other body part                 | 1 (1 to 3)      | 1 (1 to 3)       | -0.1% (-4.6% to 5%)       |
| 33 | Oman   | Motor vehicle road injuries                     | 100 (77 to 128) | 73 (57 to 93)    | -27.6% (-34.7% to -18.9%) |
| 34 | Oman   | Motorcyclist road injuries                      | 14 (10 to 19)   | 10 (7 to 14)     | -27.5% (-38% to -15.6%)   |
| 35 | Oman   | Non-venomous animal contact                     | 3 (1 to 5)      | 2 (1 to 4)       | -5% (-10.3% to -0.1%)     |
| 36 | Oman   | Other exposure to mechanical forces             | 36 (23 to 57)   | 26 (15 to 41)    | -29.3% (-35.9% to -22.8%) |
| 37 | Oman   | Other road injuries                             | 2 (1 to 4)      | 2 (1 to 4)       | -4.2% (-15.6% to 8.8%)    |
| 38 | Oman   | Other transport injuries                        | 5 (3 to 7)      | 5 (4 to 7)       | 7.3% (1.4% to 13%)        |
| 39 | Oman   | Other unintentional injuries                    | 17 (10 to 28)   | 18 (11 to 31)    | 9.3% (4.5% to 14.7%)      |
| 40 | Oman   | Pedestrian road injuries                        | 74 (57 to 91)   | 57 (44 to 71)    | -22.5% (-29.1% to -14.6%) |
| 41 | Oman   | Physical violence by firearm                    | 0 (0 to 0)      | 1 (0 to 1)       | 161.9% (132% to 195.9%)   |
| 42 | Oman   | Physical violence by other means                | 10 (7 to 14)    | 10 (7 to 15)     | 6.6% (0.3% to 13%)        |
| 43 | Oman   | Physical violence by sharp object               | 1 (1 to 2)      | 1 (1 to 2)       | 5.5% (-3.8% to 15.5%)     |
| 44 | Oman   | Poisoning by carbon monoxide                    | 0 (0 to 0)      | 0 (0 to 0)       | 33.3% (19.1% to 49.5%)    |
| 45 |        |                                                 |                 |                  |                           |
| 46 |        |                                                 |                 |                  |                           |



|    |          |                                                 |               |                |                           |
|----|----------|-------------------------------------------------|---------------|----------------|---------------------------|
| 1  |          |                                                 |               |                |                           |
| 2  | Oman     | Poisoning by other means                        | 0 (0 to 0)    | 0 (0 to 0)     | -25.7% (-34.9% to -17.5%) |
| 3  | Oman     | Pulmonary aspiration and foreign body in airway | 0 (0 to 1)    | 0 (0 to 1)     | -2.1% (-9.7% to 5.1%)     |
| 4  | Oman     | Self-harm by firearm                            | 0 (0 to 0)    | 0 (0 to 0)     | 16.3% (1.8% to 33.9%)     |
| 5  | Oman     | Self-harm by other specified means              | 1 (1 to 1)    | 1 (1 to 1)     | 2.1% (-5.5% to 10%)       |
| 6  | Oman     | Unintentional firearm injuries                  | 2 (1 to 3)    | 2 (1 to 3)     | 2.1% (-8.2% to 13.2%)     |
| 7  | Oman     | Venomous animal contact                         | 1 (1 to 3)    | 1 (1 to 3)     | -3% (-8.7% to 3.5%)       |
| 8  | Pakistan | Adverse effects of medical treatment            | 0 (0 to 0)    | 0 (0 to 0)     | 0% (0% to 0%)             |
| 9  | Pakistan | Conflict and terrorism                          | 1 (1 to 3)    | 1 (0 to 3)     | NA                        |
| 10 | Pakistan | Cyclist road injuries                           | 51 (37 to 69) | 67 (48 to 92)  | 31.4% (26.1% to 36%)      |
| 11 | Pakistan | Drowning                                        | 0 (0 to 0)    | 0 (0 to 0)     | -6% (-15.9% to 5.3%)      |
| 12 | Pakistan | Environmental heat and cold exposure            | 3 (2 to 4)    | 3 (2 to 4)     | 2.1% (-1.5% to 5.6%)      |
| 13 | Pakistan | Executions and police conflict                  | 0 (0 to 0)    | 0 (0 to 0)     | NA                        |
| 14 | Pakistan | Exposure to forces of nature                    | 0 (0 to 0)    | 0 (0 to 0)     | NA                        |
| 15 | Pakistan | Falls                                           | 36 (28 to 48) | 48 (37 to 64)  | 31.8% (28.1% to 35.6%)    |
| 16 | Pakistan | Fire, heat, and hot substances                  | 0 (0 to 1)    | 0 (0 to 1)     | -6.9% (-10.8% to -2.7%)   |
| 17 | Pakistan | Foreign body in eyes                            | 0 (0 to 0)    | 0 (0 to 0)     | -1.3% (-2.3% to -0.6%)    |
| 18 | Pakistan | Foreign body in other body part                 | 1 (1 to 3)    | 1 (1 to 3)     | -2.9% (-6.2% to 0.9%)     |
| 19 | Pakistan | Motor vehicle road injuries                     | 32 (23 to 43) | 48 (34 to 65)  | 50.9% (45.1% to 57.1%)    |
| 20 | Pakistan | Motorcyclist road injuries                      | 27 (20 to 37) | 47 (35 to 63)  | 74.6% (68% to 81.6%)      |
| 21 | Pakistan | Non-venomous animal contact                     | 8 (5 to 14)   | 7 (4 to 12)    | -15.5% (-18.5% to -12.5%) |
| 22 | Pakistan | Other exposure to mechanical forces             | 9 (5 to 15)   | 9 (5 to 15)    | -1.6% (-5.4% to 2.8%)     |
| 23 | Pakistan | Other road injuries                             | 1 (1 to 3)    | 2 (1 to 3)     | 24.4% (16.7% to 30.8%)    |
| 24 | Pakistan | Other transport injuries                        | 5 (4 to 7)    | 6 (5 to 8)     | 14.2% (9.7% to 18.6%)     |
| 25 | Pakistan | Other unintentional injuries                    | 10 (7 to 16)  | 9 (6 to 15)    | -11.2% (-14.2% to -7.7%)  |
| 26 | Pakistan | Pedestrian road injuries                        | 27 (20 to 36) | 38 (28 to 51)  | 40.2% (34.8% to 45.5%)    |
| 27 | Pakistan | Physical violence by firearm                    | 0 (0 to 0)    | 0 (0 to 0)     | -12.8% (-19.3% to -4.8%)  |
| 28 | Pakistan | Physical violence by other means                | 44 (31 to 60) | 41 (29 to 57)  | -5.8% (-9.8% to -1.4%)    |
| 29 | Pakistan | Physical violence by sharp object               | 2 (1 to 3)    | 2 (1 to 3)     | 0.1% (-5.8% to 6.9%)      |
| 30 | Pakistan | Poisoning by carbon monoxide                    | 0 (0 to 0)    | 0 (0 to 0)     | -14.9% (-21.8% to -8.2%)  |
| 31 | Pakistan | Poisoning by other means                        | 0 (0 to 0)    | 0 (0 to 0)     | -20.3% (-26.1% to -14.6%) |
| 32 | Pakistan | Pulmonary aspiration and foreign body in airway | 0 (0 to 1)    | 0 (0 to 1)     | -7.6% (-12.8% to -2.4%)   |
| 33 | Pakistan | Self-harm by firearm                            | 0 (0 to 1)    | 0 (0 to 1)     | 19.3% (9.9% to 27.9%)     |
| 34 | Pakistan | Self-harm by other specified means              | 1 (1 to 2)    | 1 (1 to 2)     | 23.4% (18.6% to 28.3%)    |
| 35 | Pakistan | Unintentional firearm injuries                  | 1 (0 to 1)    | 1 (0 to 1)     | -7.9% (-12.8% to -2.7%)   |
| 36 | Pakistan | Venomous animal contact                         | 3 (1 to 7)    | 3 (1 to 6)     | -8.4% (-12.8% to -4.1%)   |
| 37 | Palau    | Adverse effects of medical treatment            | 0 (0 to 0)    | 0 (0 to 0)     | 0% (0% to 0%)             |
| 38 | Palau    | Conflict and terrorism                          | 0 (0 to 0)    | 0 (0 to 0)     | NA                        |
| 39 | Palau    | Cyclist road injuries                           | 7 (4 to 11)   | 7 (4 to 11)    | 5.8% (-1.4% to 14.1%)     |
| 40 | Palau    | Drowning                                        | 0 (0 to 0)    | 0 (0 to 1)     | 26.1% (16.8% to 37.1%)    |
| 41 | Palau    | Environmental heat and cold exposure            | 1 (0 to 1)    | 1 (0 to 1)     | -3% (-8.4% to 3.1%)       |
| 42 | Palau    | Executions and police conflict                  | 0 (0 to 0)    | 0 (0 to 0)     | NA                        |
| 43 | Palau    | Exposure to forces of nature                    | 0 (0 to 0)    | 0 (0 to 0)     | NA                        |
| 44 | Palau    | Falls                                           | 60 (38 to 88) | 78 (51 to 117) | 30.8% (25.5% to 36.2%)    |
| 45 |          |                                                 |               |                |                           |
| 46 |          |                                                 |               |                |                           |

|    |           |                                                 |                 |                 |                           |
|----|-----------|-------------------------------------------------|-----------------|-----------------|---------------------------|
| 1  |           |                                                 |                 |                 |                           |
| 2  | Palau     | Fire, heat, and hot substances                  | 0 (0 to 1)      | 0 (0 to 1)      | -9.4% (-14.5% to -4.2%)   |
| 3  | Palau     | Foreign body in eyes                            | 0 (0 to 0)      | 0 (0 to 0)      | 2.6% (1.4% to 4.6%)       |
| 4  | Palau     | Foreign body in other body part                 | 1 (0 to 2)      | 1 (0 to 2)      | -4.7% (-9.2% to 0.5%)     |
| 5  | Palau     | Motor vehicle road injuries                     | 24 (16 to 35)   | 24 (16 to 35)   | -0.8% (-8.1% to 7.3%)     |
| 6  | Palau     | Motorcyclist road injuries                      | 27 (20 to 37)   | 27 (20 to 36)   | -0.1% (-7.4% to 6.8%)     |
| 7  | Palau     | Non-venomous animal contact                     | 4 (2 to 8)      | 4 (2 to 8)      | -3.5% (-8.6% to 2.1%)     |
| 8  | Palau     | Other exposure to mechanical forces             | 35 (18 to 62)   | 30 (15 to 55)   | -11.8% (-17.2% to -6%)    |
| 9  | Palau     | Other road injuries                             | 2 (1 to 4)      | 3 (1 to 5)      | 9.4% (-1.9% to 22.1%)     |
| 10 | Palau     | Other transport injuries                        | 6 (4 to 8)      | 6 (4 to 8)      | -1.7% (-7.3% to 3.6%)     |
| 11 | Palau     | Other unintentional injuries                    | 4 (2 to 6)      | 3 (2 to 6)      | -8.2% (-13.5% to -3%)     |
| 12 | Palau     | Pedestrian road injuries                        | 16 (11 to 22)   | 16 (11 to 22)   | 0.6% (-6.7% to 8.8%)      |
| 13 | Palau     | Physical violence by firearm                    | 0 (0 to 0)      | 0 (0 to 0)      | 27.3% (14.1% to 41.3%)    |
| 14 | Palau     | Physical violence by other means                | 46 (30 to 69)   | 43 (29 to 65)   | -5.5% (-11.3% to 0.1%)    |
| 15 | Palau     | Physical violence by sharp object               | 2 (1 to 3)      | 1 (1 to 3)      | -10.4% (-19.8% to -0.4%)  |
| 16 | Palau     | Poisoning by carbon monoxide                    | 0 (0 to 0)      | 0 (0 to 0)      | 1.2% (-10.2% to 13.6%)    |
| 17 | Palau     | Poisoning by other means                        | 0 (0 to 0)      | 0 (0 to 0)      | -27.3% (-33.9% to -20.9%) |
| 18 | Palau     | Pulmonary aspiration and foreign body in airway | 0 (0 to 0)      | 0 (0 to 0)      | -9.5% (-19.1% to 2.1%)    |
| 19 | Palau     | Self-harm by firearm                            | 0 (0 to 0)      | 0 (0 to 0)      | 12.6% (3.7% to 23.8%)     |
| 20 | Palau     | Self-harm by other specified means              | 0 (0 to 1)      | 0 (0 to 0)      | -4.2% (-11.8% to 3.6%)    |
| 21 | Palau     | Unintentional firearm injuries                  | 1 (0 to 2)      | 1 (0 to 2)      | -11.9% (-19.9% to -1.3%)  |
| 22 | Palau     | Venomous animal contact                         | 2 (1 to 4)      | 2 (1 to 4)      | -3.8% (-10.7% to 5.9%)    |
| 23 | Palestine | Adverse effects of medical treatment            | 0 (0 to 0)      | 0 (0 to 0)      | 0% (0% to 0%)             |
| 24 | Palestine | Conflict and terrorism                          | 143 (57 to 327) | 7 (3 to 16)     | NA                        |
| 25 | Palestine | Cyclist road injuries                           | 13 (9 to 19)    | 13 (9 to 18)    | -3.5% (-12% to 5.9%)      |
| 26 | Palestine | Drowning                                        | 0 (0 to 0)      | 0 (0 to 1)      | 51.3% (31.8% to 71.8%)    |
| 27 | Palestine | Environmental heat and cold exposure            | 3 (2 to 4)      | 3 (2 to 4)      | 3.3% (-1.8% to 8.3%)      |
| 28 | Palestine | Executions and police conflict                  | 0 (0 to 0)      | 3 (1 to 5)      | NA                        |
| 29 | Palestine | Exposure to forces of nature                    | 0 (0 to 0)      | 0 (0 to 0)      | NA                        |
| 30 | Palestine | Falls                                           | 92 (71 to 121)  | 102 (79 to 134) | 10.6% (5.7% to 15%)       |
| 31 | Palestine | Fire, heat, and hot substances                  | 1 (0 to 1)      | 1 (0 to 1)      | -4.6% (-16.5% to 6.7%)    |
| 32 | Palestine | Foreign body in eyes                            | 0 (0 to 0)      | 0 (0 to 0)      | 1% (0.4% to 2.2%)         |
| 33 | Palestine | Foreign body in other body part                 | 1 (1 to 3)      | 1 (1 to 3)      | 0.6% (-4.1% to 5.4%)      |
| 34 | Palestine | Motor vehicle road injuries                     | 23 (18 to 30)   | 18 (14 to 23)   | -23.2% (-29.7% to -16.2%) |
| 35 | Palestine | Motorcyclist road injuries                      | 5 (4 to 7)      | 4 (3 to 6)      | -15% (-24.4% to -4.5%)    |
| 36 | Palestine | Non-venomous animal contact                     | 5 (3 to 8)      | 5 (2 to 8)      | -2.6% (-7.9% to 2.4%)     |
| 37 | Palestine | Other exposure to mechanical forces             | 25 (15 to 42)   | 24 (14 to 38)   | -6.4% (-14.1% to 0.7%)    |
| 38 | Palestine | Other road injuries                             | 2 (1 to 3)      | 2 (1 to 3)      | -0.7% (-10.3% to 10%)     |
| 39 | Palestine | Other transport injuries                        | 5 (4 to 7)      | 6 (4 to 8)      | 6.6% (1.3% to 12.1%)      |
| 40 | Palestine | Other unintentional injuries                    | 18 (12 to 30)   | 18 (11 to 29)   | -3.5% (-11.8% to 4%)      |
| 41 | Palestine | Pedestrian road injuries                        | 14 (11 to 19)   | 12 (9 to 15)    | -16.6% (-24% to -9%)      |
| 42 | Palestine | Physical violence by firearm                    | 0 (0 to 1)      | 2 (1 to 3)      | 492.4% (393.7% to 615.6%) |
| 43 | Palestine | Physical violence by other means                | 12 (8 to 17)    | 26 (18 to 36)   | 116.4% (93.5% to 141.1%)  |
| 44 | Palestine | Physical violence by sharp object               | 2 (1 to 3)      | 3 (2 to 5)      | 91.8% (64.7% to 120.7%)   |
| 45 |           |                                                 |                 |                 |                           |
| 46 |           |                                                 |                 |                 |                           |

|    |                  |                                                 |                |                |                           |
|----|------------------|-------------------------------------------------|----------------|----------------|---------------------------|
| 1  |                  |                                                 |                |                |                           |
| 2  | Palestine        | Poisoning by carbon monoxide                    | 0 (0 to 0)     | 0 (0 to 0)     | 58.2% (44% to 76.6%)      |
| 3  | Palestine        | Poisoning by other means                        | 0 (0 to 0)     | 0 (0 to 0)     | 9.3% (0.9% to 17.8%)      |
| 4  | Palestine        | Pulmonary aspiration and foreign body in airway | 0 (0 to 1)     | 0 (0 to 1)     | -0.1% (-7.7% to 7.5%)     |
| 5  | Palestine        | Self-harm by firearm                            | 0 (0 to 0)     | 0 (0 to 0)     | 26.2% (12.6% to 43.2%)    |
| 6  | Palestine        | Self-harm by other specified means              | 1 (0 to 1)     | 1 (0 to 1)     | 1.7% (-4.3% to 8.1%)      |
| 7  | Palestine        | Unintentional firearm injuries                  | 3 (2 to 4)     | 2 (1 to 3)     | -33.4% (-42.9% to -22.4%) |
| 8  | Palestine        | Venomous animal contact                         | 3 (1 to 6)     | 3 (1 to 5)     | -3.1% (-9.6% to 2.9%)     |
| 9  | Panama           | Adverse effects of medical treatment            | 0 (0 to 0)     | 0 (0 to 0)     | 0% (0% to 0%)             |
| 10 | Panama           | Conflict and terrorism                          | 0 (0 to 1)     | 0 (0 to 0)     | NA                        |
| 11 | Panama           | Cyclist road injuries                           | 29 (21 to 39)  | 21 (15 to 29)  | -28% (-36.1% to -19.3%)   |
| 12 | Panama           | Drowning                                        | 0 (0 to 1)     | 0 (0 to 1)     | 2% (-9.9% to 15.7%)       |
| 13 | Panama           | Environmental heat and cold exposure            | 3 (2 to 5)     | 3 (2 to 5)     | 2.7% (-1.4% to 8.1%)      |
| 14 | Panama           | Executions and police conflict                  | 0 (0 to 0)     | 0 (0 to 0)     | NA                        |
| 15 | Panama           | Exposure to forces of nature                    | 0 (0 to 0)     | 0 (0 to 0)     | NA                        |
| 16 | Panama           | Falls                                           | 88 (68 to 115) | 88 (66 to 119) | -0.4% (-5.9% to 4.9%)     |
| 17 | Panama           | Fire, heat, and hot substances                  | 3 (2 to 5)     | 3 (2 to 6)     | 1% (-4.3% to 7.7%)        |
| 18 | Panama           | Foreign body in eyes                            | 0 (0 to 0)     | 0 (0 to 0)     | -0.3% (-0.7% to -0.1%)    |
| 19 | Panama           | Foreign body in other body part                 | 1 (1 to 2)     | 1 (1 to 2)     | -4.2% (-10.1% to 1.9%)    |
| 20 | Panama           | Motor vehicle road injuries                     | 55 (43 to 69)  | 47 (37 to 59)  | -15.2% (-23% to -6.7%)    |
| 21 | Panama           | Motorcyclist road injuries                      | 6 (4 to 8)     | 8 (6 to 11)    | 35% (21.4% to 50.4%)      |
| 22 | Panama           | Non-venomous animal contact                     | 6 (3 to 10)    | 4 (2 to 8)     | -22.5% (-27.8% to -16.6%) |
| 23 | Panama           | Other exposure to mechanical forces             | 39 (23 to 63)  | 39 (23 to 64)  | 0.8% (-5.6% to 7%)        |
| 24 | Panama           | Other road injuries                             | 5 (3 to 9)     | 5 (3 to 8)     | -4.3% (-14.5% to 6.7%)    |
| 25 | Panama           | Other transport injuries                        | 3 (2 to 4)     | 3 (2 to 4)     | -1.9% (-7.7% to 4.5%)     |
| 26 | Panama           | Other unintentional injuries                    | 12 (8 to 20)   | 10 (6 to 17)   | -14.7% (-20.7% to -9.1%)  |
| 27 | Panama           | Pedestrian road injuries                        | 31 (25 to 39)  | 21 (16 to 26)  | -33.7% (-40.7% to -26.6%) |
| 28 | Panama           | Physical violence by firearm                    | 1 (1 to 2)     | 5 (4 to 7)     | 256.2% (184.9% to 349.5%) |
| 29 | Panama           | Physical violence by other means                | 16 (11 to 24)  | 25 (17 to 37)  | 54.3% (33.1% to 79.2%)    |
| 30 | Panama           | Physical violence by sharp object               | 8 (5 to 12)    | 9 (6 to 14)    | 9.1% (-8.8% to 31%)       |
| 31 | Panama           | Poisoning by carbon monoxide                    | 0 (0 to 0)     | 0 (0 to 0)     | 39.1% (25.4% to 55%)      |
| 32 | Panama           | Poisoning by other means                        | 0 (0 to 0)     | 0 (0 to 0)     | 0.9% (-6.4% to 10.8%)     |
| 33 | Panama           | Pulmonary aspiration and foreign body in airway | 1 (0 to 1)     | 0 (0 to 1)     | -42.3% (-50% to -33%)     |
| 34 | Panama           | Self-harm by firearm                            | 0 (0 to 0)     | 0 (0 to 0)     | 3.1% (-12.2% to 18.6%)    |
| 35 | Panama           | Self-harm by other specified means              | 0 (0 to 1)     | 0 (0 to 1)     | 0.2% (-7.6% to 8.4%)      |
| 36 | Panama           | Unintentional firearm injuries                  | 2 (1 to 4)     | 3 (2 to 4)     | 13.7% (3% to 25.9%)       |
| 37 | Panama           | Venomous animal contact                         | 11 (6 to 19)   | 7 (4 to 13)    | -33.6% (-38.9% to -29.1%) |
| 38 | Papua New Guinea | Adverse effects of medical treatment            | 0 (0 to 0)     | 0 (0 to 0)     | 0% (0% to 0%)             |
| 39 | Papua New Guinea | Conflict and terrorism                          | 5 (2 to 12)    | 0 (0 to 0)     | NA                        |
| 40 | Papua New Guinea | Cyclist road injuries                           | 11 (7 to 15)   | 11 (7 to 16)   | 5.7% (-1.7% to 13.4%)     |
| 41 | Papua New Guinea | Drowning                                        | 0 (0 to 0)     | 0 (0 to 0)     | 4.8% (-4.7% to 14.4%)     |
| 42 | Papua New Guinea | Environmental heat and cold exposure            | 2 (1 to 3)     | 2 (1 to 3)     | -1.8% (-7.5% to 4%)       |
| 43 | Papua New Guinea | Executions and police conflict                  | 0 (0 to 0)     | 0 (0 to 0)     | NA                        |
| 44 | Papua New Guinea | Exposure to forces of nature                    | 0 (0 to 0)     | 1 (1 to 2)     | NA                        |
| 45 |                  |                                                 |                |                |                           |
| 46 |                  |                                                 |                |                |                           |

|    |                  |                                                 |                 |                 |                           |
|----|------------------|-------------------------------------------------|-----------------|-----------------|---------------------------|
| 1  |                  |                                                 |                 |                 |                           |
| 2  | Papua New Guinea | Falls                                           | 61 (48 to 79)   | 89 (70 to 115)  | 46.1% (40.3% to 52.7%)    |
| 3  | Papua New Guinea | Fire, heat, and hot substances                  | 3 (2 to 4)      | 3 (2 to 4)      | 0.6% (-5.1% to 6.3%)      |
| 4  | Papua New Guinea | Foreign body in eyes                            | 0 (0 to 0)      | 0 (0 to 0)      | -0.1% (-0.4% to 0.3%)     |
| 5  | Papua New Guinea | Foreign body in other body part                 | 1 (0 to 1)      | 1 (0 to 1)      | -2.2% (-7.1% to 2.6%)     |
| 6  | Papua New Guinea | Motor vehicle road injuries                     | 33 (26 to 42)   | 33 (26 to 43)   | -0.1% (-7.2% to 7.8%)     |
| 7  | Papua New Guinea | Motorcyclist road injuries                      | 19 (14 to 24)   | 20 (15 to 26)   | 5.8% (-2.7% to 14%)       |
| 8  | Papua New Guinea | Non-venomous animal contact                     | 5 (3 to 9)      | 4 (2 to 8)      | -11.2% (-16.5% to -6.2%)  |
| 9  | Papua New Guinea | Other exposure to mechanical forces             | 11 (6 to 18)    | 10 (6 to 17)    | -4.4% (-9.8% to 0.8%)     |
| 10 | Papua New Guinea | Other road injuries                             | 2 (1 to 3)      | 2 (1 to 3)      | 4.6% (-5.7% to 15.2%)     |
| 11 | Papua New Guinea | Other transport injuries                        | 9 (7 to 11)     | 8 (7 to 11)     | -7.8% (-12.1% to -2.9%)   |
| 12 | Papua New Guinea | Other unintentional injuries                    | 5 (3 to 8)      | 5 (3 to 8)      | 1.8% (-3.3% to 7.2%)      |
| 13 | Papua New Guinea | Pedestrian road injuries                        | 18 (13 to 23)   | 17 (13 to 22)   | -4.6% (-12.6% to 3.2%)    |
| 14 | Papua New Guinea | Physical violence by firearm                    | 0 (0 to 0)      | 0 (0 to 0)      | 63.9% (49.6% to 79.1%)    |
| 15 | Papua New Guinea | Physical violence by other means                | 28 (20 to 39)   | 43 (30 to 60)   | 52% (42.5% to 62.5%)      |
| 16 | Papua New Guinea | Physical violence by sharp object               | 3 (1 to 5)      | 4 (2 to 7)      | 41.4% (27.7% to 55.8%)    |
| 17 | Papua New Guinea | Poisoning by carbon monoxide                    | 0 (0 to 0)      | 0 (0 to 0)      | 14.8% (3.7% to 27.8%)     |
| 18 | Papua New Guinea | Poisoning by other means                        | 0 (0 to 0)      | 0 (0 to 0)      | -9.6% (-15.9% to -2.2%)   |
| 19 | Papua New Guinea | Pulmonary aspiration and foreign body in airway | 0 (0 to 0)      | 0 (0 to 0)      | 2% (-9.6% to 14.4%)       |
| 20 | Papua New Guinea | Self-harm by firearm                            | 0 (0 to 0)      | 0 (0 to 0)      | -0.6% (-11.6% to 10.7%)   |
| 21 | Papua New Guinea | Self-harm by other specified means              | 1 (0 to 1)      | 1 (0 to 1)      | 7% (-0.8% to 15.2%)       |
| 22 | Papua New Guinea | Unintentional firearm injuries                  | 2 (1 to 3)      | 2 (1 to 3)      | -1.9% (-8% to 5.4%)       |
| 23 | Papua New Guinea | Venomous animal contact                         | 4 (2 to 8)      | 4 (2 to 7)      | -13.1% (-18.6% to -7.9%)  |
| 24 | Paraguay         | Adverse effects of medical treatment            | 0 (0 to 0)      | 0 (0 to 0)      | 0% (0% to 0%)             |
| 25 | Paraguay         | Conflict and terrorism                          | 0 (0 to 0)      | 0 (0 to 0)      | NA                        |
| 26 | Paraguay         | Cyclist road injuries                           | 15 (10 to 21)   | 13 (9 to 20)    | -10.9% (-20.7% to -0.1%)  |
| 27 | Paraguay         | Drowning                                        | 0 (0 to 0)      | 0 (0 to 0)      | 5.8% (-5.8% to 17.1%)     |
| 28 | Paraguay         | Environmental heat and cold exposure            | 9 (7 to 13)     | 10 (7 to 14)    | 9.3% (4.6% to 15.4%)      |
| 29 | Paraguay         | Executions and police conflict                  | 0 (0 to 0)      | 0 (0 to 0)      | NA                        |
| 30 | Paraguay         | Exposure to forces of nature                    | 0 (0 to 0)      | 0 (0 to 0)      | NA                        |
| 31 | Paraguay         | Falls                                           | 108 (81 to 143) | 111 (84 to 148) | 3.1% (-1% to 7.2%)        |
| 32 | Paraguay         | Fire, heat, and hot substances                  | 2 (1 to 4)      | 2 (1 to 4)      | -4% (-8.5% to 1.2%)       |
| 33 | Paraguay         | Foreign body in eyes                            | 0 (0 to 0)      | 0 (0 to 0)      | 0.2% (0.1% to 0.5%)       |
| 34 | Paraguay         | Foreign body in other body part                 | 0 (0 to 1)      | 0 (0 to 1)      | -6% (-10.7% to -0.7%)     |
| 35 | Paraguay         | Motor vehicle road injuries                     | 8 (6 to 11)     | 9 (6 to 13)     | 10.4% (-2.9% to 24.5%)    |
| 36 | Paraguay         | Motorcyclist road injuries                      | 29 (22 to 37)   | 47 (37 to 58)   | 62.2% (43% to 85.1%)      |
| 37 | Paraguay         | Non-venomous animal contact                     | 2 (1 to 4)      | 2 (1 to 3)      | -17.1% (-22.3% to -11.8%) |
| 38 | Paraguay         | Other exposure to mechanical forces             | 26 (16 to 42)   | 24 (14 to 38)   | -8.2% (-14.5% to -1.1%)   |
| 39 | Paraguay         | Other road injuries                             | 5 (3 to 8)      | 4 (2 to 7)      | -3.1% (-14.5% to 8.7%)    |
| 40 | Paraguay         | Other transport injuries                        | 2 (2 to 3)      | 2 (2 to 3)      | -10.1% (-14.5% to -5.7%)  |
| 41 | Paraguay         | Other unintentional injuries                    | 27 (18 to 41)   | 24 (16 to 37)   | -10.1% (-14.5% to -5%)    |
| 42 | Paraguay         | Pedestrian road injuries                        | 26 (20 to 33)   | 27 (20 to 34)   | 1.4% (-9.1% to 13.9%)     |
| 43 | Paraguay         | Physical violence by firearm                    | 2 (1 to 2)      | 2 (2 to 3)      | 48.4% (27.7% to 73.4%)    |
| 44 | Paraguay         | Physical violence by other means                | 10 (7 to 15)    | 10 (7 to 15)    | 0.3% (-9.6% to 10.4%)     |
| 45 |                  |                                                 |                 |                 |                           |
| 46 |                  |                                                 |                 |                 |                           |

|    |             |                                                 |                |                |                           |
|----|-------------|-------------------------------------------------|----------------|----------------|---------------------------|
| 1  |             |                                                 |                |                |                           |
| 2  | Paraguay    | Physical violence by sharp object               | 4 (3 to 7)     | 4 (2 to 6)     | -7.3% (-19.5% to 6%)      |
| 3  | Paraguay    | Poisoning by carbon monoxide                    | 0 (0 to 0)     | 0 (0 to 0)     | 17.4% (6.3% to 28.8%)     |
| 4  | Paraguay    | Poisoning by other means                        | 0 (0 to 0)     | 0 (0 to 0)     | -16.8% (-22.7% to -11.4%) |
| 5  | Paraguay    | Pulmonary aspiration and foreign body in airway | 1 (0 to 1)     | 0 (0 to 1)     | -36.3% (-43.5% to -27.8%) |
| 6  | Paraguay    | Self-harm by firearm                            | 0 (0 to 0)     | 0 (0 to 0)     | 67.7% (49.2% to 87.5%)    |
| 7  | Paraguay    | Self-harm by other specified means              | 0 (0 to 0)     | 0 (0 to 1)     | 65.7% (52.2% to 82.2%)    |
| 8  | Paraguay    | Unintentional firearm injuries                  | 2 (1 to 4)     | 2 (1 to 3)     | -25% (-32.7% to -16.4%)   |
| 9  | Peru        | Venomous animal contact                         | 5 (3 to 10)    | 5 (2 to 8)     | -15.4% (-19.8% to -11%)   |
| 10 | Peru        | Adverse effects of medical treatment            | 0 (0 to 0)     | 0 (0 to 0)     | 0% (0% to 0%)             |
| 11 | Peru        | Conflict and terrorism                          | 65 (26 to 148) | 0 (0 to 0)     | NA                        |
| 12 | Peru        | Cyclist road injuries                           | 12 (8 to 16)   | 11 (8 to 16)   | -2.4% (-10.3% to 7.5%)    |
| 13 | Peru        | Drowning                                        | 0 (0 to 1)     | 0 (0 to 1)     | 22.7% (5.3% to 41.3%)     |
| 14 | Peru        | Environmental heat and cold exposure            | 9 (7 to 13)    | 9 (6 to 12)    | -3.9% (-8.3% to 0.7%)     |
| 15 | Peru        | Executions and police conflict                  | 0 (0 to 0)     | 0 (0 to 0)     | NA                        |
| 16 | Peru        | Exposure to forces of nature                    | 2 (1 to 5)     | 1 (0 to 1)     | NA                        |
| 17 | Peru        | Falls                                           | 54 (42 to 71)  | 81 (63 to 106) | 49.3% (43.2% to 55.3%)    |
| 18 | Peru        | Fire, heat, and hot substances                  | 3 (2 to 5)     | 3 (2 to 5)     | -10.7% (-19.8% to -3%)    |
| 19 | Peru        | Foreign body in eyes                            | 0 (0 to 0)     | 0 (0 to 0)     | 0.2% (-0.1% to 0.6%)      |
| 20 | Peru        | Foreign body in other body part                 | 3 (2 to 7)     | 2 (1 to 5)     | -33.7% (-41.6% to -25.2%) |
| 21 | Peru        | Motor vehicle road injuries                     | 18 (13 to 23)  | 15 (11 to 20)  | -14.2% (-21.5% to -5.6%)  |
| 22 | Peru        | Motorcyclist road injuries                      | 7 (5 to 9)     | 8 (6 to 11)    | 24.3% (13.8% to 36.8%)    |
| 23 | Peru        | Non-venomous animal contact                     | 3 (2 to 6)     | 3 (2 to 5)     | -9.4% (-15% to -4.1%)     |
| 24 | Peru        | Other exposure to mechanical forces             | 34 (20 to 55)  | 35 (21 to 56)  | 2.8% (-4.7% to 10.1%)     |
| 25 | Peru        | Other road injuries                             | 3 (2 to 5)     | 3 (2 to 4)     | -1.7% (-10.4% to 8.8%)    |
| 26 | Peru        | Other transport injuries                        | 5 (4 to 6)     | 5 (4 to 6)     | -1.2% (-6.9% to 5.5%)     |
| 27 | Peru        | Other unintentional injuries                    | 23 (16 to 36)  | 17 (11 to 27)  | -27.5% (-34.1% to -20.2%) |
| 28 | Peru        | Pedestrian road injuries                        | 19 (15 to 23)  | 16 (12 to 20)  | -15.1% (-22.3% to -7.6%)  |
| 29 | Peru        | Physical violence by firearm                    | 0 (0 to 0)     | 1 (0 to 1)     | 112.9% (86.2% to 143.2%)  |
| 30 | Peru        | Physical violence by other means                | 9 (6 to 13)    | 8 (5 to 11)    | -16% (-22.9% to -9.1%)    |
| 31 | Peru        | Physical violence by sharp object               | 2 (1 to 3)     | 2 (1 to 3)     | -3.9% (-14.6% to 7.3%)    |
| 32 | Peru        | Poisoning by carbon monoxide                    | 0 (0 to 0)     | 0 (0 to 0)     | 40.7% (22.2% to 59.9%)    |
| 33 | Peru        | Poisoning by other means                        | 0 (0 to 0)     | 0 (0 to 0)     | -9.8% (-19.2% to -1.1%)   |
| 34 | Peru        | Pulmonary aspiration and foreign body in airway | 2 (1 to 4)     | 1 (0 to 1)     | -65.6% (-70.9% to -58.8%) |
| 35 | Peru        | Self-harm by firearm                            | 0 (0 to 0)     | 0 (0 to 0)     | 37.9% (23.2% to 54.7%)    |
| 36 | Peru        | Self-harm by other specified means              | 0 (0 to 1)     | 0 (0 to 1)     | 1.2% (-7.1% to 9.5%)      |
| 37 | Peru        | Unintentional firearm injuries                  | 5 (3 to 8)     | 4 (3 to 7)     | -19.6% (-27.9% to -10.6%) |
| 38 | Peru        | Venomous animal contact                         | 6 (3 to 10)    | 5 (3 to 9)     | -9.3% (-13.6% to -5%)     |
| 39 | Philippines | Adverse effects of medical treatment            | 0 (0 to 0)     | 0 (0 to 0)     | 0% (0% to 0%)             |
| 40 | Philippines | Conflict and terrorism                          | 14 (6 to 32)   | 2 (1 to 4)     | NA                        |
| 41 | Philippines | Cyclist road injuries                           | 15 (10 to 22)  | 13 (9 to 19)   | -10.8% (-13.9% to -7.5%)  |
| 42 | Philippines | Drowning                                        | 1 (0 to 1)     | 0 (0 to 1)     | -40.1% (-42.8% to -37.5%) |
| 43 | Philippines | Environmental heat and cold exposure            | 2 (1 to 2)     | 2 (1 to 2)     | -9.8% (-11.8% to -7.8%)   |
| 44 | Philippines | Executions and police conflict                  | 0 (0 to 0)     | 1 (1 to 2)     | NA                        |
| 45 |             |                                                 |                |                |                           |
| 46 |             |                                                 |                |                |                           |

|    |             |                                                 |                  |                  |                           |
|----|-------------|-------------------------------------------------|------------------|------------------|---------------------------|
| 1  |             |                                                 |                  |                  |                           |
| 2  | Philippines | Exposure to forces of nature                    | 29 (18 to 50)    | 0 (0 to 0)       | NA                        |
| 3  | Philippines | Falls                                           | 57 (44 to 74)    | 69 (54 to 88)    | 21.3% (18.9% to 23.7%)    |
| 4  | Philippines | Fire, heat, and hot substances                  | 1 (1 to 2)       | 1 (1 to 2)       | -1.4% (-4.9% to 1.1%)     |
| 5  | Philippines | Foreign body in eyes                            | 0 (0 to 0)       | 0 (0 to 0)       | 0.1% (-4.4% to 5.4%)      |
| 6  | Philippines | Foreign body in other body part                 | 1 (1 to 2)       | 1 (1 to 2)       | 0.2% (-3.1% to 2.7%)      |
| 7  | Philippines | Motor vehicle road injuries                     | 20 (14 to 28)    | 19 (13 to 26)    | -4.2% (-7.1% to -1.4%)    |
| 8  | Philippines | Motorcyclist road injuries                      | 27 (20 to 36)    | 32 (25 to 42)    | 20.6% (16.7% to 25.2%)    |
| 9  | Philippines | Non-venomous animal contact                     | 8 (5 to 13)      | 7 (4 to 12)      | -8% (-11.8% to -2.9%)     |
| 10 | Philippines | Other exposure to mechanical forces             | 15 (9 to 25)     | 15 (8 to 25)     | 1.3% (-3% to 4.8%)        |
| 11 | Philippines | Other road injuries                             | 2 (1 to 3)       | 1 (1 to 2)       | -10.8% (-14.3% to -7.4%)  |
| 12 | Philippines | Other transport injuries                        | 5 (3 to 6)       | 4 (3 to 6)       | -4.7% (-8.6% to -1.5%)    |
| 13 | Philippines | Other unintentional injuries                    | 9 (6 to 15)      | 8 (5 to 13)      | -13% (-15.8% to -10.6%)   |
| 14 | Philippines | Pedestrian road injuries                        | 14 (10 to 18)    | 11 (8 to 15)     | -20.3% (-22.9% to -17.7%) |
| 15 | Philippines | Physical violence by firearm                    | 3 (2 to 4)       | 3 (2 to 4)       | -4.5% (-10.3% to 0.9%)    |
| 16 | Philippines | Physical violence by other means                | 47 (31 to 69)    | 35 (24 to 51)    | -24.8% (-27.3% to -22%)   |
| 17 | Philippines | Physical violence by sharp object               | 21 (13 to 32)    | 16 (10 to 24)    | -25% (-28.1% to -21.3%)   |
| 18 | Philippines | Poisoning by carbon monoxide                    | 0 (0 to 0)       | 0 (0 to 0)       | 16.5% (12.7% to 20.8%)    |
| 19 | Philippines | Poisoning by other means                        | 0 (0 to 0)       | 0 (0 to 0)       | 19.1% (15.4% to 22.9%)    |
| 20 | Philippines | Pulmonary aspiration and foreign body in airway | 0 (0 to 0)       | 0 (0 to 0)       | -34.1% (-37.6% to -30.2%) |
| 21 | Philippines | Self-harm by firearm                            | 0 (0 to 0)       | 0 (0 to 0)       | -19.7% (-27.2% to -12.5%) |
| 22 | Philippines | Self-harm by other specified means              | 1 (1 to 2)       | 1 (1 to 1)       | -9.3% (-11% to -7.3%)     |
| 23 | Philippines | Unintentional firearm injuries                  | 1 (1 to 2)       | 2 (1 to 4)       | 61.1% (49.9% to 73.6%)    |
| 24 | Philippines | Venomous animal contact                         | 1 (0 to 3)       | 1 (0 to 2)       | -41.1% (-47.5% to -35.1%) |
| 25 | Poland      | Adverse effects of medical treatment            | 0 (0 to 0)       | 0 (0 to 0)       | 0% (0% to 0%)             |
| 26 | Poland      | Conflict and terrorism                          | 0 (0 to 0)       | 0 (0 to 0)       | NA                        |
| 27 | Poland      | Cyclist road injuries                           | 80 (56 to 111)   | 66 (47 to 92)    | -17.2% (-20.6% to -13.3%) |
| 28 | Poland      | Drowning                                        | 0 (0 to 1)       | 0 (0 to 1)       | -16.9% (-24.8% to -8.1%)  |
| 29 | Poland      | Environmental heat and cold exposure            | 2 (2 to 3)       | 1 (1 to 1)       | -64.1% (-72.4% to -53.4%) |
| 30 | Poland      | Executions and police conflict                  | 0 (0 to 0)       | 0 (0 to 0)       | NA                        |
| 31 | Poland      | Exposure to forces of nature                    | 0 (0 to 0)       | 0 (0 to 0)       | NA                        |
| 32 | Poland      | Falls                                           | 271 (212 to 354) | 305 (238 to 396) | 12.6% (9.2% to 16.2%)     |
| 33 | Poland      | Fire, heat, and hot substances                  | 4 (3 to 7)       | 4 (2 to 6)       | -13% (-16.6% to -9.4%)    |
| 34 | Poland      | Foreign body in eyes                            | 0 (0 to 0)       | 0 (0 to 0)       | 0.6% (0.2% to 1.1%)       |
| 35 | Poland      | Foreign body in other body part                 | 3 (1 to 6)       | 3 (1 to 6)       | -6% (-8.3% to -4%)        |
| 36 | Poland      | Motor vehicle road injuries                     | 125 (88 to 165)  | 108 (79 to 143)  | -13.2% (-16.9% to -9.2%)  |
| 37 | Poland      | Motorcyclist road injuries                      | 26 (19 to 36)    | 21 (15 to 29)    | -21.4% (-25.4% to -16.9%) |
| 38 | Poland      | Non-venomous animal contact                     | 7 (4 to 13)      | 6 (3 to 10)      | -22% (-23.7% to -20.4%)   |
| 39 | Poland      | Other exposure to mechanical forces             | 144 (89 to 227)  | 128 (78 to 201)  | -11% (-14.6% to -7.2%)    |
| 40 | Poland      | Other road injuries                             | 3 (2 to 5)       | 2 (1 to 3)       | -41.7% (-48% to -35.9%)   |
| 41 | Poland      | Other transport injuries                        | 10 (8 to 13)     | 7 (5 to 9)       | -31.6% (-35.5% to -27.9%) |
| 42 | Poland      | Other unintentional injuries                    | 46 (29 to 75)    | 29 (18 to 49)    | -36.6% (-42.1% to -32.2%) |
| 43 | Poland      | Pedestrian road injuries                        | 78 (58 to 99)    | 31 (22 to 40)    | -60.6% (-62.6% to -58.4%) |
| 44 | Poland      | Physical violence by firearm                    | 0 (0 to 0)       | 0 (0 to 1)       | 60.4% (45.6% to 75.3%)    |
| 45 |             |                                                 |                  |                  |                           |
| 46 |             |                                                 |                  |                  |                           |

|    |             |                                                 |                  |                  |                           |
|----|-------------|-------------------------------------------------|------------------|------------------|---------------------------|
| 1  |             |                                                 |                  |                  |                           |
| 2  | Poland      | Physical violence by other means                | 31 (22 to 44)    | 22 (15 to 31)    | -28.1% (-33% to -22.7%)   |
| 3  | Poland      | Physical violence by sharp object               | 3 (2 to 4)       | 2 (1 to 3)       | -34.6% (-44.6% to -25%)   |
| 4  | Poland      | Poisoning by carbon monoxide                    | 0 (0 to 0)       | 0 (0 to 0)       | -7% (-19.4% to 5.2%)      |
| 5  | Poland      | Poisoning by other means                        | 1 (0 to 1)       | 0 (0 to 1)       | -23.4% (-32.1% to -14%)   |
| 6  | Poland      | Pulmonary aspiration and foreign body in airway | 1 (1 to 2)       | 1 (1 to 2)       | -34% (-40.1% to -28.3%)   |
| 7  | Poland      | Self-harm by firearm                            | 0 (0 to 1)       | 1 (0 to 1)       | 12.1% (5.6% to 18.7%)     |
| 8  | Poland      | Self-harm by other specified means              | 4 (2 to 6)       | 4 (2 to 6)       | -1.4% (-4.2% to 1.3%)     |
| 9  | Poland      | Unintentional firearm injuries                  | 1 (1 to 2)       | 1 (1 to 2)       | 0.9% (-4% to 5.2%)        |
| 10 | Poland      | Venomous animal contact                         | 6 (3 to 11)      | 5 (2 to 9)       | -20.7% (-22.3% to -19.2%) |
| 11 | Portugal    | Adverse effects of medical treatment            | 0 (0 to 0)       | 0 (0 to 0)       | 0% (0% to 0%)             |
| 12 | Portugal    | Conflict and terrorism                          | 0 (0 to 0)       | 0 (0 to 0)       | NA                        |
| 13 | Portugal    | Cyclist road injuries                           | 31 (23 to 42)    | 15 (11 to 19)    | -53.1% (-60.2% to -45.6%) |
| 14 | Portugal    | Drowning                                        | 0 (0 to 0)       | 0 (0 to 0)       | 40.5% (21.8% to 61.2%)    |
| 15 | Portugal    | Environmental heat and cold exposure            | 2 (1 to 3)       | 2 (1 to 3)       | -3.3% (-7.6% to 1.7%)     |
| 16 | Portugal    | Executions and police conflict                  | 0 (0 to 0)       | 0 (0 to 0)       | NA                        |
| 17 | Portugal    | Exposure to forces of nature                    | 0 (0 to 0)       | 0 (0 to 0)       | NA                        |
| 18 | Portugal    | Falls                                           | 187 (146 to 242) | 159 (125 to 202) | -15.1% (-20.8% to -9%)    |
| 19 | Portugal    | Fire, heat, and hot substances                  | 2 (1 to 3)       | 2 (1 to 3)       | -16% (-22.7% to -9.4%)    |
| 20 | Portugal    | Foreign body in eyes                            | 0 (0 to 0)       | 0 (0 to 0)       | 0.3% (-3.9% to 5.9%)      |
| 21 | Portugal    | Foreign body in other body part                 | 2 (1 to 3)       | 2 (1 to 3)       | 4.3% (-2.1% to 11.1%)     |
| 22 | Portugal    | Motor vehicle road injuries                     | 34 (25 to 45)    | 14 (10 to 18)    | -59.9% (-66.4% to -53.3%) |
| 23 | Portugal    | Motorcyclist road injuries                      | 9 (6 to 12)      | 7 (5 to 9)       | -23.5% (-36.3% to -9.8%)  |
| 24 | Portugal    | Non-venomous animal contact                     | 2 (1 to 3)       | 2 (1 to 3)       | -7% (-12.1% to -0.3%)     |
| 25 | Portugal    | Other exposure to mechanical forces             | 50 (31 to 79)    | 36 (21 to 59)    | -28.5% (-37.2% to -19.2%) |
| 26 | Portugal    | Other road injuries                             | 2 (1 to 3)       | 1 (1 to 2)       | -40.4% (-50.3% to -30.3%) |
| 27 | Portugal    | Other transport injuries                        | 8 (6 to 10)      | 8 (6 to 10)      | -0.4% (-6.9% to 5.8%)     |
| 28 | Portugal    | Other unintentional injuries                    | 28 (18 to 43)    | 20 (13 to 32)    | -27.3% (-34.3% to -21%)   |
| 29 | Portugal    | Pedestrian road injuries                        | 31 (25 to 40)    | 5 (4 to 6)       | -84.3% (-87.1% to -80.9%) |
| 30 | Portugal    | Physical violence by firearm                    | 0 (0 to 1)       | 1 (0 to 1)       | 33% (12% to 58.2%)        |
| 31 | Portugal    | Physical violence by other means                | 22 (16 to 30)    | 13 (9 to 19)     | -39.2% (-45.6% to -31.5%) |
| 32 | Portugal    | Physical violence by sharp object               | 1 (1 to 2)       | 1 (1 to 2)       | -17.7% (-30.3% to -4.1%)  |
| 33 | Portugal    | Poisoning by carbon monoxide                    | 0 (0 to 0)       | 0 (0 to 0)       | 32.9% (21.6% to 45.6%)    |
| 34 | Portugal    | Poisoning by other means                        | 0 (0 to 0)       | 0 (0 to 0)       | -9.7% (-16.2% to -2.6%)   |
| 35 | Portugal    | Pulmonary aspiration and foreign body in airway | 1 (1 to 2)       | 1 (0 to 1)       | -27.6% (-35.5% to -19%)   |
| 36 | Portugal    | Self-harm by firearm                            | 0 (0 to 1)       | 0 (0 to 1)       | 3.3% (-10.4% to 19.1%)    |
| 37 | Portugal    | Self-harm by other specified means              | 3 (2 to 4)       | 2 (1 to 3)       | -34.1% (-38.5% to -29.6%) |
| 38 | Portugal    | Unintentional firearm injuries                  | 1 (1 to 2)       | 1 (1 to 2)       | -23.1% (-34.8% to -12.2%) |
| 39 | Portugal    | Venomous animal contact                         | 1 (1 to 3)       | 1 (1 to 2)       | -7.8% (-13% to -2%)       |
| 40 | Puerto Rico | Adverse effects of medical treatment            | 0 (0 to 0)       | 0 (0 to 0)       | 0% (0% to 0%)             |
| 41 | Puerto Rico | Conflict and terrorism                          | 0 (0 to 0)       | 0 (0 to 0)       | NA                        |
| 42 | Puerto Rico | Cyclist road injuries                           | 24 (15 to 35)    | 18 (11 to 27)    | -24.2% (-34% to -13.7%)   |
| 43 | Puerto Rico | Drowning                                        | 0 (0 to 0)       | 0 (0 to 0)       | 49.5% (31.8% to 70.2%)    |
| 44 | Puerto Rico | Environmental heat and cold exposure            | 1 (1 to 3)       | 1 (1 to 3)       | 5.1% (1% to 9.6%)         |
| 45 |             |                                                 |                  |                  |                           |
| 46 |             |                                                 |                  |                  |                           |

|    |             |                                                 |                  |                  |                           |
|----|-------------|-------------------------------------------------|------------------|------------------|---------------------------|
| 1  |             |                                                 |                  |                  |                           |
| 2  | Puerto Rico | Executions and police conflict                  | 0 (0 to 0)       | 0 (0 to 0)       | NA                        |
| 3  | Puerto Rico | Exposure to forces of nature                    | 0 (0 to 0)       | 0 (0 to 0)       | NA                        |
| 4  | Puerto Rico | Falls                                           | 42 (27 to 63)    | 56 (36 to 86)    | 34.5% (29.1% to 40.5%)    |
| 5  | Puerto Rico | Fire, heat, and hot substances                  | 1 (0 to 1)       | 1 (0 to 1)       | 4.8% (-1.6% to 10.9%)     |
| 6  | Puerto Rico | Foreign body in eyes                            | 0 (0 to 0)       | 0 (0 to 0)       | -0.1% (-0.3% to 0.1%)     |
| 7  | Puerto Rico | Foreign body in other body part                 | 2 (1 to 3)       | 2 (1 to 4)       | 7.9% (0.6% to 16%)        |
| 8  | Puerto Rico | Motor vehicle road injuries                     | 48 (33 to 67)    | 24 (16 to 35)    | -49.2% (-56.4% to -41.7%) |
| 9  | Puerto Rico | Motorcyclist road injuries                      | 20 (14 to 28)    | 26 (19 to 34)    | 28.3% (10.3% to 49.7%)    |
| 10 | Puerto Rico | Non-venomous animal contact                     | 2 (1 to 4)       | 2 (1 to 3)       | -8.9% (-14% to -3.7%)     |
| 11 | Puerto Rico | Other exposure to mechanical forces             | 53 (26 to 99)    | 61 (31 to 113)   | 15.3% (8.8% to 20.9%)     |
| 12 | Puerto Rico | Other road injuries                             | 6 (3 to 11)      | 5 (2 to 9)       | -17.5% (-28% to -5.3%)    |
| 13 | Puerto Rico | Other transport injuries                        | 3 (2 to 4)       | 3 (2 to 4)       | -5.6% (-13% to 2.2%)      |
| 14 | Puerto Rico | Other unintentional injuries                    | 5 (3 to 9)       | 5 (3 to 9)       | -5.5% (-12.8% to 0.5%)    |
| 15 | Puerto Rico | Pedestrian road injuries                        | 34 (25 to 46)    | 17 (12 to 24)    | -48.6% (-55.1% to -41.6%) |
| 16 | Puerto Rico | Physical violence by firearm                    | 7 (5 to 11)      | 10 (6 to 15)     | 30.9% (5.5% to 62.9%)     |
| 17 | Puerto Rico | Physical violence by other means                | 18 (11 to 28)    | 16 (9 to 25)     | -11.2% (-22.6% to 2.2%)   |
| 18 | Puerto Rico | Physical violence by sharp object               | 5 (3 to 10)      | 4 (2 to 8)       | -18.7% (-31.7% to -4.6%)  |
| 19 | Puerto Rico | Poisoning by carbon monoxide                    | 0 (0 to 0)       | 0 (0 to 0)       | -27.3% (-43% to -13.5%)   |
| 20 | Puerto Rico | Poisoning by other means                        | 0 (0 to 0)       | 0 (0 to 0)       | -58.2% (-67% to -47.7%)   |
| 21 | Puerto Rico | Pulmonary aspiration and foreign body in airway | 0 (0 to 0)       | 0 (0 to 0)       | -17.3% (-25.4% to -7.7%)  |
| 22 | Puerto Rico | Self-harm by firearm                            | 0 (0 to 0)       | 0 (0 to 0)       | -31.8% (-37.7% to -26.1%) |
| 23 | Puerto Rico | Self-harm by other specified means              | 0 (0 to 0)       | 0 (0 to 0)       | -17.8% (-27.3% to -8%)    |
| 24 | Puerto Rico | Unintentional firearm injuries                  | 2 (1 to 4)       | 2 (1 to 5)       | 13.8% (2.3% to 25.9%)     |
| 25 | Puerto Rico | Venomous animal contact                         | 1 (0 to 3)       | 1 (0 to 3)       | -8.5% (-14% to -2.5%)     |
| 26 | Qatar       | Adverse effects of medical treatment            | 0 (0 to 0)       | 0 (0 to 0)       | 0% (0% to 0%)             |
| 27 | Qatar       | Conflict and terrorism                          | 0 (0 to 0)       | 0 (0 to 0)       | NA                        |
| 28 | Qatar       | Cyclist road injuries                           | 28 (20 to 39)    | 18 (13 to 25)    | -36.6% (-43.3% to -28.7%) |
| 29 | Qatar       | Drowning                                        | 0 (0 to 0)       | 0 (0 to 1)       | 63.7% (39.1% to 91.9%)    |
| 30 | Qatar       | Environmental heat and cold exposure            | 4 (3 to 6)       | 4 (3 to 6)       | -4.6% (-10.9% to 0.7%)    |
| 31 | Qatar       | Executions and police conflict                  | 0 (0 to 0)       | 0 (0 to 0)       | NA                        |
| 32 | Qatar       | Exposure to forces of nature                    | 0 (0 to 0)       | 0 (0 to 0)       | NA                        |
| 33 | Qatar       | Falls                                           | 141 (109 to 185) | 173 (133 to 228) | 22.1% (16.1% to 28.6%)    |
| 34 | Qatar       | Fire, heat, and hot substances                  | 1 (1 to 2)       | 1 (0 to 1)       | -35.7% (-42.5% to -27.8%) |
| 35 | Qatar       | Foreign body in eyes                            | 0 (0 to 0)       | 0 (0 to 0)       | 4.2% (1.9% to 7.2%)       |
| 36 | Qatar       | Foreign body in other body part                 | 1 (1 to 3)       | 1 (1 to 3)       | -0.4% (-5% to 4.2%)       |
| 37 | Qatar       | Motor vehicle road injuries                     | 79 (61 to 99)    | 53 (42 to 67)    | -32.3% (-38.3% to -25.5%) |
| 38 | Qatar       | Motorcyclist road injuries                      | 13 (10 to 17)    | 9 (7 to 12)      | -29% (-37.1% to -19.5%)   |
| 39 | Qatar       | Non-venomous animal contact                     | 2 (1 to 4)       | 2 (1 to 4)       | -0.5% (-6.1% to 6.3%)     |
| 40 | Qatar       | Other exposure to mechanical forces             | 48 (30 to 74)    | 37 (23 to 56)    | -23.7% (-29.7% to -18%)   |
| 41 | Qatar       | Other road injuries                             | 2 (1 to 4)       | 2 (1 to 3)       | -14.7% (-24.5% to -3%)    |
| 42 | Qatar       | Other transport injuries                        | 10 (8 to 13)     | 7 (6 to 9)       | -26.5% (-33.2% to -19.5%) |
| 43 | Qatar       | Other unintentional injuries                    | 21 (14 to 35)    | 18 (12 to 30)    | -13.6% (-19.4% to -7.2%)  |
| 44 | Qatar       | Pedestrian road injuries                        | 43 (33 to 54)    | 26 (20 to 33)    | -38.4% (-44.4% to -31.6%) |
| 45 |             |                                                 |                  |                  |                           |
| 46 |             |                                                 |                  |                  |                           |



|    |                     |                                                 |                  |                  |                           |
|----|---------------------|-------------------------------------------------|------------------|------------------|---------------------------|
| 1  |                     |                                                 |                  |                  |                           |
| 2  | Qatar               | Physical violence by firearm                    | 0 (0 to 0)       | 1 (0 to 1)       | 161.8% (124.2% to 200.8%) |
| 3  | Qatar               | Physical violence by other means                | 12 (9 to 17)     | 13 (9 to 19)     | 6.3% (-0.2% to 12.7%)     |
| 4  | Qatar               | Physical violence by sharp object               | 2 (1 to 3)       | 2 (1 to 3)       | 19.7% (8% to 36.5%)       |
| 5  | Qatar               | Poisoning by carbon monoxide                    | 0 (0 to 0)       | 0 (0 to 0)       | 35% (22.6% to 49.8%)      |
| 6  | Qatar               | Poisoning by other means                        | 0 (0 to 0)       | 0 (0 to 0)       | -10.6% (-17.3% to -3.4%)  |
| 7  | Qatar               | Pulmonary aspiration and foreign body in airway | 0 (0 to 1)       | 0 (0 to 1)       | -20.1% (-30.8% to -6.9%)  |
| 8  | Qatar               | Self-harm by firearm                            | 0 (0 to 0)       | 0 (0 to 0)       | 42.6% (20.8% to 68.2%)    |
| 9  | Qatar               | Self-harm by other specified means              | 1 (1 to 2)       | 1 (1 to 2)       | -1.8% (-9.6% to 5.9%)     |
| 10 | Qatar               | Unintentional firearm injuries                  | 2 (1 to 3)       | 2 (1 to 3)       | 1.5% (-8.1% to 13.1%)     |
| 11 | Republic of Korea   | Venomous animal contact                         | 1 (0 to 2)       | 1 (0 to 2)       | -1.9% (-8.3% to 5.7%)     |
| 12 | Republic of Korea   | Adverse effects of medical treatment            | 0 (0 to 0)       | 0 (0 to 0)       | 0% (0% to 0%)             |
| 13 | Republic of Korea   | Conflict and terrorism                          | 0 (0 to 1)       | 0 (0 to 0)       | NA                        |
| 14 | Republic of Korea   | Cyclist road injuries                           | 34 (25 to 45)    | 19 (14 to 26)    | -43.1% (-50.7% to -34.2%) |
| 15 | Republic of Korea   | Drowning                                        | 0 (0 to 0)       | 1 (0 to 1)       | 129.8% (98.6% to 164.4%)  |
| 16 | Republic of Korea   | Environmental heat and cold exposure            | 4 (3 to 5)       | 3 (2 to 5)       | -8.2% (-13.7% to -3%)     |
| 17 | Republic of Korea   | Executions and police conflict                  | 0 (0 to 0)       | 0 (0 to 0)       | NA                        |
| 18 | Republic of Korea   | Exposure to forces of nature                    | 0 (0 to 1)       | 0 (0 to 0)       | NA                        |
| 19 | Republic of Korea   | Falls                                           | 205 (160 to 262) | 223 (175 to 284) | 8.9% (2.4% to 15.9%)      |
| 20 | Republic of Korea   | Fire, heat, and hot substances                  | 4 (2 to 6)       | 3 (2 to 5)       | -16.3% (-25.6% to -7.6%)  |
| 21 | Republic of Korea   | Foreign body in eyes                            | 0 (0 to 0)       | 0 (0 to 0)       | 1.3% (0.4% to 2.7%)       |
| 22 | Republic of Korea   | Foreign body in other body part                 | 2 (1 to 5)       | 3 (1 to 5)       | 9.1% (4.2% to 13.7%)      |
| 23 | Republic of Korea   | Motor vehicle road injuries                     | 47 (36 to 60)    | 25 (18 to 32)    | -46.5% (-53.4% to -38.5%) |
| 24 | Republic of Korea   | Motorcyclist road injuries                      | 24 (19 to 31)    | 12 (9 to 16)     | -50.3% (-57.5% to -41.8%) |
| 25 | Republic of Korea   | Non-venomous animal contact                     | 6 (3 to 11)      | 6 (3 to 10)      | -6.5% (-11.2% to -1.5%)   |
| 26 | Republic of Korea   | Other exposure to mechanical forces             | 72 (45 to 114)   | 73 (44 to 116)   | 0.7% (-8.8% to 9.7%)      |
| 27 | Republic of Korea   | Other road injuries                             | 2 (1 to 3)       | 1 (1 to 2)       | -32.4% (-44.2% to -18.9%) |
| 28 | Republic of Korea   | Other transport injuries                        | 10 (8 to 12)     | 7 (6 to 10)      | -24% (-32.7% to -13.3%)   |
| 29 | Republic of Korea   | Other unintentional injuries                    | 47 (32 to 74)    | 34 (22 to 55)    | -27.8% (-35.9% to -20%)   |
| 30 | Republic of Korea   | Pedestrian road injuries                        | 27 (21 to 34)    | 11 (8 to 14)     | -59.5% (-64% to -54.2%)   |
| 31 | Republic of Korea   | Physical violence by firearm                    | 0 (0 to 0)       | 1 (0 to 1)       | 106.4% (81.9% to 139.1%)  |
| 32 | Republic of Korea   | Physical violence by other means                | 15 (10 to 21)    | 13 (9 to 19)     | -12.8% (-20.9% to -3.6%)  |
| 33 | Republic of Korea   | Physical violence by sharp object               | 2 (1 to 3)       | 1 (1 to 2)       | -35% (-46% to -24.1%)     |
| 34 | Republic of Korea   | Poisoning by carbon monoxide                    | 0 (0 to 0)       | 0 (0 to 0)       | -27% (-39.8% to -11.9%)   |
| 35 | Republic of Korea   | Poisoning by other means                        | 0 (0 to 1)       | 0 (0 to 1)       | -22.6% (-33.1% to -12.1%) |
| 36 | Republic of Korea   | Pulmonary aspiration and foreign body in airway | 1 (0 to 1)       | 0 (0 to 1)       | -41.6% (-48.8% to -34.5%) |
| 37 | Republic of Korea   | Self-harm by firearm                            | 0 (0 to 0)       | 0 (0 to 1)       | 69.3% (33.8% to 110.6%)   |
| 38 | Republic of Korea   | Self-harm by other specified means              | 3 (2 to 5)       | 6 (4 to 9)       | 77.1% (63.8% to 91.3%)    |
| 39 | Republic of Korea   | Unintentional firearm injuries                  | 1 (1 to 2)       | 1 (1 to 2)       | 22.4% (8.1% to 37%)       |
| 40 | Republic of Korea   | Venomous animal contact                         | 3 (1 to 6)       | 3 (1 to 5)       | -13.9% (-19.5% to -8.9%)  |
| 41 | Republic of Moldova | Adverse effects of medical treatment            | 0 (0 to 0)       | 0 (0 to 0)       | 0% (0% to 0%)             |
| 42 | Republic of Moldova | Conflict and terrorism                          | 0 (0 to 0)       | 0 (0 to 0)       | NA                        |
| 43 | Republic of Moldova | Cyclist road injuries                           | 65 (46 to 87)    | 41 (29 to 57)    | -36.1% (-42.9% to -28.1%) |
| 44 | Republic of Moldova | Drowning                                        | 1 (0 to 1)       | 1 (0 to 1)       | 10.5% (0.7% to 22%)       |
| 45 |                     |                                                 |                  |                  |                           |
| 46 |                     |                                                 |                  |                  |                           |

|    |                     |                                                 |                  |                  |                           |
|----|---------------------|-------------------------------------------------|------------------|------------------|---------------------------|
| 1  |                     |                                                 |                  |                  |                           |
| 2  | Republic of Moldova | Environmental heat and cold exposure            | 10 (7 to 14)     | 11 (8 to 15)     | 12.3% (3.9% to 21.6%)     |
| 3  | Republic of Moldova | Executions and police conflict                  | 0 (0 to 0)       | 0 (0 to 0)       | NA                        |
| 4  | Republic of Moldova | Exposure to forces of nature                    | 0 (0 to 0)       | 0 (0 to 0)       | NA                        |
| 5  | Republic of Moldova | Falls                                           | 220 (172 to 282) | 190 (146 to 248) | -13.6% (-18.6% to -7.7%)  |
| 6  | Republic of Moldova | Fire, heat, and hot substances                  | 4 (2 to 7)       | 3 (2 to 5)       | -21.3% (-29.6% to -13.8%) |
| 7  | Republic of Moldova | Foreign body in eyes                            | 0 (0 to 0)       | 0 (0 to 0)       | 1.2% (0.7% to 1.9%)       |
| 8  | Republic of Moldova | Foreign body in other body part                 | 2 (1 to 4)       | 2 (1 to 4)       | 1.3% (-3.8% to 7.2%)      |
| 9  | Republic of Moldova | Motor vehicle road injuries                     | 141 (109 to 176) | 98 (76 to 122)   | -30.7% (-38.8% to -22.1%) |
| 10 | Republic of Moldova | Motorcyclist road injuries                      | 23 (17 to 29)    | 11 (8 to 15)     | -49.3% (-57.7% to -40.1%) |
| 11 | Republic of Moldova | Non-venomous animal contact                     | 5 (3 to 8)       | 5 (3 to 8)       | 0.3% (-4.5% to 5.2%)      |
| 12 | Republic of Moldova | Other exposure to mechanical forces             | 83 (52 to 133)   | 69 (41 to 110)   | -17.5% (-25.8% to -9.5%)  |
| 13 | Republic of Moldova | Other road injuries                             | 4 (2 to 6)       | 2 (1 to 4)       | -39.8% (-47.4% to -31.2%) |
| 14 | Republic of Moldova | Other transport injuries                        | 7 (5 to 8)       | 5 (4 to 7)       | -18.2% (-24.9% to -11.3%) |
| 15 | Republic of Moldova | Other unintentional injuries                    | 41 (26 to 65)    | 24 (15 to 39)    | -40.8% (-47.2% to -33.1%) |
| 16 | Republic of Moldova | Pedestrian road injuries                        | 79 (62 to 99)    | 35 (27 to 45)    | -55.4% (-60.5% to -50.1%) |
| 17 | Republic of Moldova | Physical violence by firearm                    | 0 (0 to 0)       | 0 (0 to 0)       | 18.6% (-7.6% to 47.6%)    |
| 18 | Republic of Moldova | Physical violence by other means                | 42 (30 to 59)    | 24 (17 to 33)    | -43% (-50.2% to -33.6%)   |
| 19 | Republic of Moldova | Physical violence by sharp object               | 5 (3 to 7)       | 3 (2 to 6)       | -24.6% (-38.4% to -10.7%) |
| 20 | Republic of Moldova | Poisoning by carbon monoxide                    | 0 (0 to 0)       | 0 (0 to 0)       | -2.9% (-11.8% to 6.9%)    |
| 21 | Republic of Moldova | Poisoning by other means                        | 0 (0 to 1)       | 0 (0 to 1)       | -27.1% (-35.2% to -18.9%) |
| 22 | Republic of Moldova | Pulmonary aspiration and foreign body in airway | 1 (1 to 2)       | 1 (1 to 2)       | -5.1% (-11.6% to 2.9%)    |
| 23 | Republic of Moldova | Self-harm by firearm                            | 1 (0 to 1)       | 1 (0 to 1)       | 0.6% (-13.7% to 16.7%)    |
| 24 | Republic of Moldova | Self-harm by other specified means              | 3 (2 to 5)       | 3 (2 to 4)       | -11.2% (-16.3% to -5.5%)  |
| 25 | Republic of Moldova | Unintentional firearm injuries                  | 1 (1 to 2)       | 1 (0 to 2)       | -18.6% (-29.9% to -6.3%)  |
| 26 | Romania             | Venomous animal contact                         | 4 (2 to 7)       | 4 (2 to 7)       | 4.7% (-0.5% to 10.8%)     |
| 27 | Romania             | Adverse effects of medical treatment            | 0 (0 to 0)       | 0 (0 to 0)       | 0% (0% to 0%)             |
| 28 | Romania             | Conflict and terrorism                          | 2 (1 to 5)       | 0 (0 to 0)       | NA                        |
| 29 | Romania             | Cyclist road injuries                           | 58 (43 to 77)    | 49 (36 to 65)    | -16.2% (-25.2% to -5.3%)  |
| 30 | Romania             | Drowning                                        | 0 (0 to 1)       | 0 (0 to 1)       | 24.8% (9.7% to 40.2%)     |
| 31 | Romania             | Environmental heat and cold exposure            | 3 (2 to 4)       | 2 (2 to 3)       | -17.3% (-21.9% to -12.8%) |
| 32 | Romania             | Executions and police conflict                  | 0 (0 to 0)       | 0 (0 to 0)       | NA                        |
| 33 | Romania             | Exposure to forces of nature                    | 0 (0 to 0)       | 0 (0 to 0)       | NA                        |
| 34 | Romania             | Falls                                           | 307 (240 to 402) | 268 (206 to 352) | -12.7% (-18.5% to -6.1%)  |
| 35 | Romania             | Fire, heat, and hot substances                  | 5 (3 to 9)       | 4 (2 to 6)       | -24.8% (-30.5% to -19.7%) |
| 36 | Romania             | Foreign body in eyes                            | 0 (0 to 0)       | 0 (0 to 0)       | 0.3% (0.1% to 0.6%)       |
| 37 | Romania             | Foreign body in other body part                 | 2 (1 to 5)       | 2 (1 to 5)       | 1.1% (-4% to 7.5%)        |
| 38 | Romania             | Motor vehicle road injuries                     | 95 (74 to 119)   | 79 (61 to 100)   | -16.6% (-25.3% to -6.5%)  |
| 39 | Romania             | Motorcyclist road injuries                      | 15 (11 to 20)    | 12 (9 to 16)     | -21.7% (-33% to -8.2%)    |
| 40 | Romania             | Non-venomous animal contact                     | 7 (4 to 12)      | 6 (3 to 10)      | -13.9% (-18.5% to -9.3%)  |
| 41 | Romania             | Other exposure to mechanical forces             | 160 (102 to 248) | 140 (88 to 219)  | -12.4% (-18.9% to -5%)    |
| 42 | Romania             | Other road injuries                             | 2 (1 to 3)       | 1 (1 to 2)       | -28.6% (-37.3% to -19.6%) |
| 43 | Romania             | Other transport injuries                        | 8 (6 to 10)      | 7 (5 to 9)       | -11.8% (-17.3% to -6.4%)  |
| 44 | Romania             | Other unintentional injuries                    | 35 (22 to 55)    | 29 (18 to 47)    | -16.4% (-23.9% to -8.6%)  |
| 45 |                     |                                                 |                  |                  |                           |
| 46 |                     |                                                 |                  |                  |                           |

|    |                    |                                                 |                  |                  |                           |
|----|--------------------|-------------------------------------------------|------------------|------------------|---------------------------|
| 1  |                    |                                                 |                  |                  |                           |
| 2  | Romania            | Pedestrian road injuries                        | 48 (38 to 60)    | 25 (19 to 32)    | -47.7% (-53.8% to -40.4%) |
| 3  | Romania            | Physical violence by firearm                    | 0 (0 to 0)       | 0 (0 to 1)       | 105.3% (79.4% to 134.1%)  |
| 4  | Romania            | Physical violence by other means                | 36 (25 to 49)    | 24 (17 to 34)    | -32.1% (-40.8% to -21.9%) |
| 5  | Romania            | Physical violence by sharp object               | 3 (2 to 5)       | 2 (1 to 3)       | -33.8% (-46.2% to -22.1%) |
| 6  | Romania            | Poisoning by carbon monoxide                    | 0 (0 to 0)       | 0 (0 to 0)       | -6.4% (-21.7% to 11%)     |
| 7  | Romania            | Poisoning by other means                        | 1 (1 to 1)       | 0 (0 to 1)       | -50.4% (-60% to -41.2%)   |
| 8  | Romania            | Pulmonary aspiration and foreign body in airway | 1 (1 to 2)       | 1 (1 to 2)       | -22.1% (-30.4% to -14.1%) |
| 9  | Romania            | Self-harm by firearm                            | 0 (0 to 0)       | 0 (0 to 1)       | 43.5% (21.7% to 71.2%)    |
| 10 | Romania            | Self-harm by other specified means              | 2 (1 to 3)       | 2 (2 to 4)       | 11.5% (5.3% to 17.9%)     |
| 11 | Romania            | Unintentional firearm injuries                  | 1 (1 to 2)       | 1 (1 to 2)       | 1.9% (-9.7% to 13.5%)     |
| 12 | Romania            | Venomous animal contact                         | 5 (2 to 10)      | 4 (2 to 9)       | -17.2% (-21.8% to -12.7%) |
| 13 | Russian Federation | Adverse effects of medical treatment            | 0 (0 to 0)       | 0 (0 to 0)       | 0% (0% to 0%)             |
| 14 | Russian Federation | Conflict and terrorism                          | 1 (0 to 2)       | 0 (0 to 0)       | NA                        |
| 15 | Russian Federation | Cyclist road injuries                           | 69 (46 to 99)    | 57 (38 to 83)    | -17.6% (-21.5% to -13.7%) |
| 16 | Russian Federation | Drowning                                        | 1 (1 to 1)       | 0 (0 to 1)       | -52.3% (-54.3% to -50.3%) |
| 17 | Russian Federation | Environmental heat and cold exposure            | 21 (15 to 28)    | 11 (8 to 15)     | -46.1% (-49.7% to -41.8%) |
| 18 | Russian Federation | Executions and police conflict                  | 0 (0 to 0)       | 0 (0 to 0)       | NA                        |
| 19 | Russian Federation | Exposure to forces of nature                    | 0 (0 to 0)       | 0 (0 to 0)       | NA                        |
| 20 | Russian Federation | Falls                                           | 243 (184 to 329) | 254 (193 to 343) | 4.1% (1.6% to 6.7%)       |
| 21 | Russian Federation | Fire, heat, and hot substances                  | 4 (3 to 7)       | 3 (2 to 5)       | -27.5% (-31.4% to -24.5%) |
| 22 | Russian Federation | Foreign body in eyes                            | 0 (0 to 0)       | 0 (0 to 0)       | 0.9% (0.4% to 1.7%)       |
| 23 | Russian Federation | Foreign body in other body part                 | 3 (1 to 5)       | 3 (1 to 5)       | -1% (-1.9% to 0.4%)       |
| 24 | Russian Federation | Motor vehicle road injuries                     | 202 (146 to 268) | 180 (132 to 238) | -11% (-14.3% to -7.3%)    |
| 25 | Russian Federation | Motorcyclist road injuries                      | 23 (15 to 32)    | 17 (12 to 25)    | -22.9% (-26.5% to -19.1%) |
| 26 | Russian Federation | Non-venomous animal contact                     | 5 (3 to 8)       | 4 (2 to 7)       | -13.2% (-16.1% to -10.9%) |
| 27 | Russian Federation | Other exposure to mechanical forces             | 124 (77 to 195)  | 80 (50 to 127)   | -35.1% (-38.1% to -31.9%) |
| 28 | Russian Federation | Other road injuries                             | 4 (2 to 6)       | 3 (2 to 6)       | -13.1% (-17.8% to -8.3%)  |
| 29 | Russian Federation | Other transport injuries                        | 8 (6 to 10)      | 7 (5 to 10)      | -6.8% (-8.6% to -5.1%)    |
| 30 | Russian Federation | Other unintentional injuries                    | 34 (22 to 56)    | 26 (16 to 42)    | -25.1% (-28.5% to -21.2%) |
| 31 | Russian Federation | Pedestrian road injuries                        | 124 (91 to 161)  | 54 (39 to 71)    | -56.3% (-58.2% to -54.5%) |
| 32 | Russian Federation | Physical violence by firearm                    | 0 (0 to 1)       | 0 (0 to 0)       | -15.7% (-25.9% to -5.8%)  |
| 33 | Russian Federation | Physical violence by other means                | 59 (41 to 86)    | 38 (27 to 55)    | -35.2% (-37% to -33%)     |
| 34 | Russian Federation | Physical violence by sharp object               | 6 (4 to 10)      | 3 (2 to 5)       | -46.2% (-50.8% to -41%)   |
| 35 | Russian Federation | Poisoning by carbon monoxide                    | 0 (0 to 0)       | 0 (0 to 0)       | -29.3% (-34% to -24.3%)   |
| 36 | Russian Federation | Poisoning by other means                        | 0 (0 to 1)       | 0 (0 to 0)       | -28.6% (-33.9% to -23.9%) |
| 37 | Russian Federation | Pulmonary aspiration and foreign body in airway | 1 (1 to 2)       | 1 (1 to 2)       | -9.8% (-13% to -6.1%)     |
| 38 | Russian Federation | Self-harm by firearm                            | 2 (1 to 3)       | 1 (1 to 2)       | -32.9% (-36.2% to -29.9%) |
| 39 | Russian Federation | Self-harm by other specified means              | 7 (4 to 11)      | 6 (4 to 9)       | -19.1% (-21.3% to -16.7%) |
| 40 | Russian Federation | Unintentional firearm injuries                  | 1 (1 to 2)       | 1 (1 to 2)       | -24.6% (-31.1% to -18.7%) |
| 41 | Russian Federation | Venomous animal contact                         | 4 (2 to 7)       | 3 (1 to 6)       | -8.9% (-11.6% to -6.5%)   |
| 42 | Rwanda             | Adverse effects of medical treatment            | 0 (0 to 0)       | 0 (0 to 0)       | 0% (0% to 0%)             |
| 43 | Rwanda             | Conflict and terrorism                          | 167 (51 to 429)  | 0 (0 to 0)       | NA                        |
| 44 | Rwanda             | Cyclist road injuries                           | 66 (45 to 96)    | 47 (32 to 68)    | -29.6% (-35.1% to -23.6%) |
| 45 |                    |                                                 |                  |                  |                           |
| 46 |                    |                                                 |                  |                  |                           |

|    |                       |                                                 |                |                |                           |
|----|-----------------------|-------------------------------------------------|----------------|----------------|---------------------------|
| 1  |                       |                                                 |                |                |                           |
| 2  | Rwanda                | Drowning                                        | 0 (0 to 0)     | 0 (0 to 0)     | -22.8% (-30.1% to -12.9%) |
| 3  | Rwanda                | Environmental heat and cold exposure            | 0 (0 to 1)     | 0 (0 to 1)     | -9.8% (-17% to -2.8%)     |
| 4  | Rwanda                | Executions and police conflict                  | 0 (0 to 0)     | 0 (0 to 0)     | NA                        |
| 5  | Rwanda                | Exposure to forces of nature                    | 0 (0 to 0)     | 0 (0 to 0)     | NA                        |
| 6  | Rwanda                | Falls                                           | 23 (15 to 36)  | 28 (18 to 44)  | 21.6% (16.3% to 27%)      |
| 7  | Rwanda                | Fire, heat, and hot substances                  | 0 (0 to 1)     | 0 (0 to 1)     | -24.1% (-30.9% to -17.6%) |
| 8  | Rwanda                | Foreign body in eyes                            | 0 (0 to 0)     | 0 (0 to 0)     | -0.4% (-1.2% to 0%)       |
| 9  | Rwanda                | Foreign body in other body part                 | 3 (1 to 7)     | 3 (1 to 7)     | 0% (-5.8% to 7.1%)        |
| 10 | Rwanda                | Motor vehicle road injuries                     | 35 (22 to 52)  | 28 (18 to 41)  | -19.9% (-27.1% to -11%)   |
| 11 | Rwanda                | Motorcyclist road injuries                      | 52 (38 to 71)  | 42 (31 to 57)  | -18.8% (-24.3% to -12.6%) |
| 12 | Rwanda                | Non-venomous animal contact                     | 6 (3 to 12)    | 5 (2 to 9)     | -22.7% (-27.7% to -17.1%) |
| 13 | Rwanda                | Other exposure to mechanical forces             | 26 (13 to 48)  | 24 (12 to 44)  | -8.1% (-15.7% to -0.4%)   |
| 14 | Rwanda                | Other road injuries                             | 2 (1 to 4)     | 2 (1 to 3)     | -7.7% (-15.7% to 1.4%)    |
| 15 | Rwanda                | Other transport injuries                        | 4 (3 to 6)     | 3 (2 to 4)     | -27.5% (-33.3% to -20.3%) |
| 16 | Rwanda                | Other unintentional injuries                    | 3 (2 to 5)     | 2 (1 to 4)     | -20.4% (-27.8% to -13%)   |
| 17 | Rwanda                | Pedestrian road injuries                        | 94 (68 to 126) | 65 (48 to 87)  | -30.3% (-34.9% to -25.3%) |
| 18 | Rwanda                | Physical violence by firearm                    | 0 (0 to 0)     | 0 (0 to 0)     | 13% (-5.5% to 33.6%)      |
| 19 | Rwanda                | Physical violence by other means                | 7 (5 to 11)    | 5 (3 to 8)     | -28.7% (-33.8% to -22.8%) |
| 20 | Rwanda                | Physical violence by sharp object               | 2 (1 to 3)     | 1 (1 to 3)     | -17% (-24.8% to -8.6%)    |
| 21 | Rwanda                | Poisoning by carbon monoxide                    | 0 (0 to 0)     | 0 (0 to 0)     | 13.7% (-0.2% to 30.9%)    |
| 22 | Rwanda                | Poisoning by other means                        | 0 (0 to 0)     | 0 (0 to 0)     | -28.5% (-37.4% to -18.6%) |
| 23 | Rwanda                | Pulmonary aspiration and foreign body in airway | 0 (0 to 0)     | 0 (0 to 0)     | -17.5% (-27% to -7%)      |
| 24 | Rwanda                | Self-harm by firearm                            | 0 (0 to 0)     | 0 (0 to 0)     | -16.3% (-24% to -7.3%)    |
| 25 | Rwanda                | Self-harm by other specified means              | 0 (0 to 0)     | 0 (0 to 0)     | -36.7% (-41.3% to -32.1%) |
| 26 | Rwanda                | Unintentional firearm injuries                  | 1 (0 to 2)     | 1 (0 to 2)     | -24.9% (-33.6% to -15.7%) |
| 27 | Rwanda                | Venomous animal contact                         | 1 (0 to 3)     | 1 (0 to 2)     | -26% (-34.8% to -17.4%)   |
| 28 | Saint Kitts and Nevis | Adverse effects of medical treatment            | 0 (0 to 0)     | 0 (0 to 0)     | 0% (0% to 0%)             |
| 29 | Saint Kitts and Nevis | Conflict and terrorism                          | 0 (0 to 0)     | 0 (0 to 0)     | NA                        |
| 30 | Saint Kitts and Nevis | Cyclist road injuries                           | 22 (14 to 32)  | 19 (12 to 28)  | -13.2% (-24.7% to -1.5%)  |
| 31 | Saint Kitts and Nevis | Drowning                                        | 0 (0 to 0)     | 0 (0 to 0)     | 11.6% (-0.7% to 25.2%)    |
| 32 | Saint Kitts and Nevis | Environmental heat and cold exposure            | 2 (1 to 3)     | 2 (1 to 3)     | 2.3% (-2.1% to 7.4%)      |
| 33 | Saint Kitts and Nevis | Executions and police conflict                  | 0 (0 to 0)     | 0 (0 to 0)     | NA                        |
| 34 | Saint Kitts and Nevis | Exposure to forces of nature                    | 0 (0 to 0)     | 0 (0 to 0)     | NA                        |
| 35 | Saint Kitts and Nevis | Falls                                           | 32 (21 to 47)  | 41 (27 to 62)  | 30.9% (25.7% to 36%)      |
| 36 | Saint Kitts and Nevis | Fire, heat, and hot substances                  | 1 (1 to 2)     | 1 (1 to 1)     | -32.7% (-38.6% to -26.6%) |
| 37 | Saint Kitts and Nevis | Foreign body in eyes                            | 0 (0 to 0)     | 0 (0 to 0)     | 0.8% (0% to 1.8%)         |
| 38 | Saint Kitts and Nevis | Foreign body in other body part                 | 2 (1 to 3)     | 2 (1 to 3)     | -1.6% (-7.7% to 6%)       |
| 39 | Saint Kitts and Nevis | Motor vehicle road injuries                     | 34 (23 to 48)  | 25 (17 to 35)  | -26.5% (-35.7% to -16.7%) |
| 40 | Saint Kitts and Nevis | Motorcyclist road injuries                      | 22 (16 to 30)  | 26 (18 to 36)  | 17.4% (3.3% to 34.1%)     |
| 41 | Saint Kitts and Nevis | Non-venomous animal contact                     | 2 (1 to 4)     | 2 (1 to 4)     | -10% (-14.9% to -4.6%)    |
| 42 | Saint Kitts and Nevis | Other exposure to mechanical forces             | 82 (42 to 147) | 86 (43 to 154) | 5% (-2.9% to 12.7%)       |
| 43 | Saint Kitts and Nevis | Other road injuries                             | 5 (3 to 9)     | 5 (3 to 9)     | 0% (-14% to 14.5%)        |
| 44 | Saint Kitts and Nevis | Other transport injuries                        | 3 (2 to 4)     | 3 (2 to 4)     | -1.6% (-8.3% to 6.2%)     |
| 45 |                       |                                                 |                |                |                           |
| 46 |                       |                                                 |                |                |                           |

|    |                                  |                                                 |               |               |                           |
|----|----------------------------------|-------------------------------------------------|---------------|---------------|---------------------------|
| 1  |                                  |                                                 |               |               |                           |
| 2  | Saint Kitts and Nevis            | Other unintentional injuries                    | 4 (2 to 8)    | 4 (2 to 8)    | -8.8% (-14.7% to -2.7%)   |
| 3  | Saint Kitts and Nevis            | Pedestrian road injuries                        | 22 (16 to 30) | 14 (10 to 20) | -36.5% (-44.8% to -27.9%) |
| 4  | Saint Kitts and Nevis            | Physical violence by firearm                    | 2 (1 to 2)    | 6 (3 to 9)    | 276.5% (204.1% to 366.2%) |
| 5  | Saint Kitts and Nevis            | Physical violence by other means                | 12 (8 to 19)  | 18 (11 to 28) | 42.9% (23.3% to 63%)      |
| 6  | Saint Kitts and Nevis            | Physical violence by sharp object               | 4 (2 to 7)    | 6 (3 to 11)   | 58.4% (32.4% to 86.2%)    |
| 7  | Saint Kitts and Nevis            | Poisoning by carbon monoxide                    | 0 (0 to 0)    | 0 (0 to 0)    | 18.3% (5.1% to 32%)       |
| 8  | Saint Kitts and Nevis            | Poisoning by other means                        | 0 (0 to 0)    | 0 (0 to 0)    | -1.8% (-13.6% to 8.6%)    |
| 9  | Saint Kitts and Nevis            | Pulmonary aspiration and foreign body in airway | 0 (0 to 0)    | 0 (0 to 0)    | -11.3% (-19.8% to -2.9%)  |
| 10 | Saint Kitts and Nevis            | Self-harm by firearm                            | 0 (0 to 0)    | 0 (0 to 0)    | 7.1% (-4.4% to 21.9%)     |
| 11 | Saint Kitts and Nevis            | Self-harm by other specified means              | 0 (0 to 0)    | 0 (0 to 0)    | -9.4% (-22.4% to 4.1%)    |
| 12 | Saint Kitts and Nevis            | Unintentional firearm injuries                  | 7 (3 to 14)   | 6 (2 to 12)   | -18.4% (-28.8% to -6.9%)  |
| 13 | Saint Kitts and Nevis            | Venomous animal contact                         | 2 (1 to 3)    | 1 (0 to 3)    | -10.2% (-15.7% to -4.3%)  |
| 14 | Saint Lucia                      | Adverse effects of medical treatment            | 0 (0 to 0)    | 0 (0 to 0)    | 0% (0% to 0%)             |
| 15 | Saint Lucia                      | Conflict and terrorism                          | 4 (2 to 9)    | 0 (0 to 0)    | NA                        |
| 16 | Saint Lucia                      | Cyclist road injuries                           | 35 (25 to 47) | 28 (20 to 38) | -20.9% (-29.5% to -11.1%) |
| 17 | Saint Lucia                      | Drowning                                        | 0 (0 to 1)    | 0 (0 to 1)    | 24.8% (11.3% to 40.6%)    |
| 18 | Saint Lucia                      | Environmental heat and cold exposure            | 10 (7 to 14)  | 11 (8 to 15)  | 5.5% (1.6% to 9.7%)       |
| 19 | Saint Lucia                      | Executions and police conflict                  | 0 (0 to 0)    | 0 (0 to 0)    | NA                        |
| 20 | Saint Lucia                      | Exposure to forces of nature                    | 0 (0 to 0)    | 0 (0 to 0)    | NA                        |
| 21 | Saint Lucia                      | Falls                                           | 43 (34 to 56) | 64 (49 to 83) | 47.2% (41.4% to 52.7%)    |
| 22 | Saint Lucia                      | Fire, heat, and hot substances                  | 4 (3 to 7)    | 4 (2 to 6)    | -11.7% (-18.3% to -5.1%)  |
| 23 | Saint Lucia                      | Foreign body in eyes                            | 0 (0 to 0)    | 0 (0 to 0)    | 1.4% (0.7% to 2.5%)       |
| 24 | Saint Lucia                      | Foreign body in other body part                 | 1 (1 to 2)    | 1 (1 to 2)    | 1% (-4.6% to 6.4%)        |
| 25 | Saint Lucia                      | Motor vehicle road injuries                     | 42 (32 to 54) | 32 (24 to 42) | -23.2% (-32% to -15.1%)   |
| 26 | Saint Lucia                      | Motorcyclist road injuries                      | 14 (11 to 19) | 19 (15 to 25) | 35.1% (18.2% to 56.1%)    |
| 27 | Saint Lucia                      | Non-venomous animal contact                     | 3 (2 to 5)    | 3 (2 to 5)    | -5.2% (-11% to 0.7%)      |
| 28 | Saint Lucia                      | Other exposure to mechanical forces             | 37 (22 to 61) | 46 (27 to 75) | 22.4% (16.1% to 29.7%)    |
| 29 | Saint Lucia                      | Other road injuries                             | 4 (2 to 7)    | 4 (2 to 6)    | -3.5% (-13.9% to 8.6%)    |
| 30 | Saint Lucia                      | Other transport injuries                        | 5 (4 to 7)    | 6 (4 to 8)    | 15.5% (7.8% to 23.6%)     |
| 31 | Saint Lucia                      | Other unintentional injuries                    | 15 (9 to 24)  | 14 (9 to 23)  | -5.3% (-10.7% to 0.2%)    |
| 32 | Saint Lucia                      | Pedestrian road injuries                        | 19 (15 to 24) | 13 (9 to 17)  | -33.8% (-41% to -25.7%)   |
| 33 | Saint Lucia                      | Physical violence by firearm                    | 1 (1 to 1)    | 3 (2 to 4)    | 235.6% (181.4% to 294.7%) |
| 34 | Saint Lucia                      | Physical violence by other means                | 12 (8 to 17)  | 15 (10 to 23) | 26.9% (15.3% to 38.6%)    |
| 35 | Saint Lucia                      | Physical violence by sharp object               | 6 (4 to 8)    | 8 (5 to 12)   | 39.1% (21.6% to 59.2%)    |
| 36 | Saint Lucia                      | Poisoning by carbon monoxide                    | 0 (0 to 0)    | 0 (0 to 0)    | 14.1% (1.2% to 28.2%)     |
| 37 | Saint Lucia                      | Poisoning by other means                        | 0 (0 to 0)    | 0 (0 to 0)    | -6.3% (-16.5% to 4.2%)    |
| 38 | Saint Lucia                      | Pulmonary aspiration and foreign body in airway | 1 (0 to 1)    | 0 (0 to 1)    | -19.7% (-26.8% to -12.4%) |
| 39 | Saint Lucia                      | Self-harm by firearm                            | 0 (0 to 0)    | 0 (0 to 0)    | 12.4% (-0.3% to 27.5%)    |
| 40 | Saint Lucia                      | Self-harm by other specified means              | 1 (0 to 1)    | 1 (0 to 1)    | -2.8% (-11.2% to 5.1%)    |
| 41 | Saint Lucia                      | Unintentional firearm injuries                  | 5 (3 to 7)    | 5 (3 to 8)    | 14.4% (4.2% to 25.2%)     |
| 42 | Saint Lucia                      | Venomous animal contact                         | 5 (2 to 9)    | 5 (2 to 9)    | -4% (-8.7% to 1.5%)       |
| 43 | Saint Vincent and the Grenadines | Adverse effects of medical treatment            | 0 (0 to 0)    | 0 (0 to 0)    | 0% (0% to 0%)             |
| 44 | Saint Vincent and the Grenadines | Conflict and terrorism                          | 0 (0 to 0)    | 0 (0 to 0)    | NA                        |

|    |                                  |                                                 |               |                |                           |
|----|----------------------------------|-------------------------------------------------|---------------|----------------|---------------------------|
| 1  | Saint Vincent and the Grenadines | Cyclist road injuries                           | 27 (19 to 36) | 23 (16 to 30)  | -15.1% (-22.6% to -6.7%)  |
| 2  | Saint Vincent and the Grenadines | Drowning                                        | 0 (0 to 1)    | 0 (0 to 1)     | 6% (-3.4% to 15.2%)       |
| 3  | Saint Vincent and the Grenadines | Environmental heat and cold exposure            | 11 (8 to 16)  | 12 (9 to 17)   | 5.2% (1.2% to 9.9%)       |
| 4  | Saint Vincent and the Grenadines | Executions and police conflict                  | 0 (0 to 0)    | 0 (0 to 0)     | NA                        |
| 5  | Saint Vincent and the Grenadines | Exposure to forces of nature                    | 0 (0 to 0)    | 0 (0 to 0)     | NA                        |
| 6  | Saint Vincent and the Grenadines | Falls                                           | 55 (43 to 71) | 80 (63 to 104) | 45.7% (40.1% to 50.9%)    |
| 7  | Saint Vincent and the Grenadines | Fire, heat, and hot substances                  | 5 (3 to 8)    | 4 (3 to 7)     | -17.9% (-24% to -11.3%)   |
| 8  | Saint Vincent and the Grenadines | Foreign body in eyes                            | 0 (0 to 0)    | 0 (0 to 0)     | 1.7% (0.7% to 3.3%)       |
| 9  | Saint Vincent and the Grenadines | Foreign body in other body part                 | 2 (1 to 4)    | 1 (1 to 3)     | -28.2% (-35% to -21.7%)   |
| 10 | Saint Vincent and the Grenadines | Motor vehicle road injuries                     | 19 (14 to 25) | 19 (14 to 24)  | -1.8% (-11.4% to 8.9%)    |
| 11 | Saint Vincent and the Grenadines | Motorcyclist road injuries                      | 10 (7 to 14)  | 12 (9 to 16)   | 21% (9.1% to 36.3%)       |
| 12 | Saint Vincent and the Grenadines | Non-venomous animal contact                     | 3 (2 to 6)    | 3 (2 to 6)     | -5.3% (-10.9% to 1%)      |
| 13 | Saint Vincent and the Grenadines | Other exposure to mechanical forces             | 39 (23 to 64) | 46 (28 to 76)  | 19.2% (11.3% to 28.1%)    |
| 14 | Saint Vincent and the Grenadines | Other road injuries                             | 3 (2 to 5)    | 3 (2 to 5)     | -4% (-13.8% to 6.5%)      |
| 15 | Saint Vincent and the Grenadines | Other transport injuries                        | 4 (3 to 6)    | 4 (3 to 6)     | 1.4% (-4.2% to 7.9%)      |
| 16 | Saint Vincent and the Grenadines | Other unintentional injuries                    | 13 (8 to 21)  | 13 (8 to 21)   | -3.2% (-8.2% to 2.1%)     |
| 17 | Saint Vincent and the Grenadines | Pedestrian road injuries                        | 19 (15 to 25) | 10 (8 to 13)   | -47.3% (-53.6% to -40.4%) |
| 18 | Saint Vincent and the Grenadines | Physical violence by firearm                    | 1 (1 to 1)    | 2 (1 to 3)     | 138.4% (101.8% to 185.5%) |
| 19 | Saint Vincent and the Grenadines | Physical violence by other means                | 15 (10 to 21) | 18 (12 to 26)  | 18.5% (4.5% to 32.2%)     |
| 20 | Saint Vincent and the Grenadines | Physical violence by sharp object               | 4 (2 to 6)    | 8 (5 to 12)    | 97.3% (69.8% to 132.5%)   |
| 21 | Saint Vincent and the Grenadines | Poisoning by carbon monoxide                    | 0 (0 to 0)    | 0 (0 to 0)     | 16.6% (2% to 30.7%)       |
| 22 | Saint Vincent and the Grenadines | Poisoning by other means                        | 0 (0 to 0)    | 0 (0 to 0)     | 3.9% (-6.9% to 13.6%)     |
| 23 | Saint Vincent and the Grenadines | Pulmonary aspiration and foreign body in airway | 1 (0 to 1)    | 0 (0 to 1)     | -16% (-23.4% to -8%)      |
| 24 | Saint Vincent and the Grenadines | Self-harm by firearm                            | 0 (0 to 0)    | 0 (0 to 0)     | 11.6% (-0.7% to 26.5%)    |
| 25 | Saint Vincent and the Grenadines | Self-harm by other specified means              | 0 (0 to 1)    | 0 (0 to 1)     | -12.4% (-19.7% to -5.3%)  |
| 26 | Saint Vincent and the Grenadines | Unintentional firearm injuries                  | 5 (3 to 8)    | 5 (3 to 8)     | -1.2% (-11.3% to 9.2%)    |
| 27 | Saint Vincent and the Grenadines | Venomous animal contact                         | 5 (3 to 10)   | 5 (2 to 9)     | -8.5% (-13.7% to -2.5%)   |
| 28 | Samoa                            | Adverse effects of medical treatment            | 0 (0 to 0)    | 0 (0 to 0)     | 0% (0% to 0%)             |
| 29 | Samoa                            | Conflict and terrorism                          | 0 (0 to 0)    | 0 (0 to 0)     | NA                        |
| 30 | Samoa                            | Cyclist road injuries                           | 14 (9 to 20)  | 14 (10 to 20)  | 2.2% (-4.8% to 10%)       |
| 31 | Samoa                            | Drowning                                        | 0 (0 to 1)    | 0 (0 to 1)     | 9.8% (1.7% to 19.7%)      |
| 32 | Samoa                            | Environmental heat and cold exposure            | 2 (2 to 3)    | 2 (2 to 3)     | 0% (-5.4% to 5%)          |
| 33 | Samoa                            | Executions and police conflict                  | 0 (0 to 0)    | 0 (0 to 0)     | NA                        |
| 34 | Samoa                            | Exposure to forces of nature                    | 28 (17 to 46) | 0 (0 to 0)     | NA                        |
| 35 | Samoa                            | Falls                                           | 52 (41 to 68) | 74 (58 to 97)  | 43.4% (38.2% to 48.8%)    |
| 36 | Samoa                            | Fire, heat, and hot substances                  | 1 (1 to 2)    | 1 (1 to 2)     | 6.8% (-0.5% to 14.5%)     |
| 37 | Samoa                            | Foreign body in eyes                            | 0 (0 to 0)    | 0 (0 to 0)     | -0.1% (-0.7% to 0.5%)     |
| 38 | Samoa                            | Foreign body in other body part                 | 1 (0 to 1)    | 1 (0 to 1)     | -2.3% (-8.4% to 3%)       |
| 39 | Samoa                            | Motor vehicle road injuries                     | 34 (26 to 43) | 33 (25 to 42)  | -4.1% (-10.7% to 3.3%)    |
| 40 | Samoa                            | Motorcyclist road injuries                      | 11 (8 to 14)  | 13 (9 to 17)   | 17.3% (7.7% to 28.4%)     |
| 41 | Samoa                            | Non-venomous animal contact                     | 5 (3 to 8)    | 4 (2 to 7)     | -14.9% (-19.5% to -10.6%) |
| 42 | Samoa                            | Other exposure to mechanical forces             | 13 (8 to 22)  | 12 (7 to 19)   | -11.7% (-17.6% to -6.4%)  |
| 43 | Samoa                            | Other road injuries                             | 2 (1 to 3)    | 2 (1 to 3)     | 1.6% (-7.6% to 12.9%)     |

|    |                       |                                                 |                |                 |                           |
|----|-----------------------|-------------------------------------------------|----------------|-----------------|---------------------------|
| 1  |                       |                                                 |                |                 |                           |
| 2  | Samoa                 | Other transport injuries                        | 6 (5 to 8)     | 6 (4 to 8)      | -5.7% (-10.5% to -0.8%)   |
| 3  | Samoa                 | Other unintentional injuries                    | 7 (4 to 10)    | 6 (4 to 10)     | -2.6% (-7.5% to 2.6%)     |
| 4  | Samoa                 | Pedestrian road injuries                        | 16 (12 to 20)  | 17 (13 to 22)   | 11.8% (3.1% to 20.8%)     |
| 5  | Samoa                 | Physical violence by firearm                    | 0 (0 to 0)     | 0 (0 to 0)      | 2.7% (-8.9% to 16.1%)     |
| 6  | Samoa                 | Physical violence by other means                | 35 (25 to 50)  | 35 (25 to 49)   | 0.2% (-5.9% to 6.8%)      |
| 7  | Samoa                 | Physical violence by sharp object               | 3 (2 to 5)     | 2 (2 to 4)      | -22.6% (-30.5% to -14.7%) |
| 8  | Samoa                 | Poisoning by carbon monoxide                    | 0 (0 to 0)     | 0 (0 to 0)      | 12.3% (1.8% to 24.1%)     |
| 9  | Samoa                 | Poisoning by other means                        | 0 (0 to 0)     | 0 (0 to 0)      | -12.4% (-18.8% to -5.9%)  |
| 10 | Samoa                 | Pulmonary aspiration and foreign body in airway | 0 (0 to 0)     | 0 (0 to 0)      | -7.3% (-16.7% to 3.4%)    |
| 11 | Samoa                 | Self-harm by firearm                            | 1 (0 to 1)     | 1 (0 to 1)      | -11.2% (-26% to 4.2%)     |
| 12 | Samoa                 | Self-harm by other specified means              | 3 (2 to 4)     | 3 (2 to 4)      | -5% (-11.2% to 1.6%)      |
| 13 | Samoa                 | Unintentional firearm injuries                  | 2 (1 to 3)     | 2 (1 to 3)      | -18% (-25.4% to -10.5%)   |
| 14 | Samoa                 | Venomous animal contact                         | 3 (1 to 6)     | 3 (1 to 5)      | -11% (-16.3% to -5.1%)    |
| 15 | San Marino            | Adverse effects of medical treatment            | 0 (0 to 0)     | 0 (0 to 0)      | 0% (0% to 0%)             |
| 16 | San Marino            | Conflict and terrorism                          | 0 (0 to 0)     | 0 (0 to 0)      | NA                        |
| 17 | San Marino            | Cyclist road injuries                           | 21 (14 to 31)  | 15 (10 to 22)   | -29.2% (-35.8% to -21.7%) |
| 18 | San Marino            | Drowning                                        | 0 (0 to 0)     | 0 (0 to 0)      | 70.4% (57.6% to 85.2%)    |
| 19 | San Marino            | Environmental heat and cold exposure            | 0 (0 to 1)     | 0 (0 to 1)      | -1.2% (-6% to 4.8%)       |
| 20 | San Marino            | Executions and police conflict                  | 0 (0 to 0)     | 0 (0 to 0)      | NA                        |
| 21 | San Marino            | Exposure to forces of nature                    | 0 (0 to 0)     | 0 (0 to 0)      | NA                        |
| 22 | San Marino            | Falls                                           | 95 (59 to 147) | 116 (71 to 181) | 22.5% (18.2% to 26.9%)    |
| 23 | San Marino            | Fire, heat, and hot substances                  | 0 (0 to 1)     | 0 (0 to 1)      | 3.5% (-0.1% to 7.9%)      |
| 24 | San Marino            | Foreign body in eyes                            | 0 (0 to 0)     | 0 (0 to 0)      | -0.6% (-1.6% to -0.1%)    |
| 25 | San Marino            | Foreign body in other body part                 | 2 (1 to 4)     | 2 (1 to 4)      | 0.4% (-4.5% to 6.4%)      |
| 26 | San Marino            | Motor vehicle road injuries                     | 33 (23 to 47)  | 24 (17 to 35)   | -25.9% (-32.6% to -18.8%) |
| 27 | San Marino            | Motorcyclist road injuries                      | 29 (21 to 38)  | 23 (17 to 31)   | -20.8% (-28.3% to -12.7%) |
| 28 | San Marino            | Non-venomous animal contact                     | 1 (1 to 2)     | 1 (0 to 2)      | -4% (-8.2% to 0.2%)       |
| 29 | San Marino            | Other exposure to mechanical forces             | 85 (44 to 157) | 78 (39 to 143)  | -8% (-12.7% to -2.9%)     |
| 30 | San Marino            | Other road injuries                             | 5 (2 to 8)     | 4 (2 to 8)      | -5.2% (-14.9% to 7%)      |
| 31 | San Marino            | Other transport injuries                        | 2 (1 to 3)     | 2 (2 to 3)      | 7.2% (2.1% to 12.5%)      |
| 32 | San Marino            | Other unintentional injuries                    | 8 (4 to 14)    | 7 (4 to 13)     | -8.2% (-12.8% to -4.5%)   |
| 33 | San Marino            | Pedestrian road injuries                        | 9 (6 to 12)    | 6 (4 to 9)      | -26.2% (-32.5% to -19%)   |
| 34 | San Marino            | Physical violence by firearm                    | 0 (0 to 1)     | 1 (0 to 1)      | 25.4% (15.5% to 36.5%)    |
| 35 | San Marino            | Physical violence by other means                | 12 (8 to 19)   | 12 (8 to 19)    | 1.7% (-3.1% to 7.1%)      |
| 36 | San Marino            | Physical violence by sharp object               | 1 (0 to 2)     | 1 (0 to 2)      | -0.4% (-9.1% to 8.1%)     |
| 37 | San Marino            | Poisoning by carbon monoxide                    | 0 (0 to 0)     | 0 (0 to 0)      | 25% (16.3% to 35.3%)      |
| 38 | San Marino            | Poisoning by other means                        | 0 (0 to 0)     | 0 (0 to 0)      | -14.1% (-18.2% to -8.9%)  |
| 39 | San Marino            | Pulmonary aspiration and foreign body in airway | 0 (0 to 0)     | 0 (0 to 0)      | -3.7% (-10.8% to 4.3%)    |
| 40 | San Marino            | Self-harm by firearm                            | 0 (0 to 0)     | 0 (0 to 0)      | -9.2% (-15.8% to -2.8%)   |
| 41 | San Marino            | Self-harm by other specified means              | 0 (0 to 0)     | 0 (0 to 0)      | 0.5% (-5.4% to 5.8%)      |
| 42 | San Marino            | Unintentional firearm injuries                  | 0 (0 to 1)     | 0 (0 to 1)      | 6.5% (-2% to 14.7%)       |
| 43 | San Marino            | Venomous animal contact                         | 0 (0 to 1)     | 0 (0 to 1)      | -5.4% (-12.5% to 2%)      |
| 44 | Sao Tome and Principe | Adverse effects of medical treatment            | 0 (0 to 0)     | 0 (0 to 0)      | 0% (0% to 0%)             |
| 45 |                       |                                                 |                |                 |                           |
| 46 |                       |                                                 |                |                 |                           |

|    |                       |                                                 |                  |                  |                          |
|----|-----------------------|-------------------------------------------------|------------------|------------------|--------------------------|
| 1  |                       |                                                 |                  |                  |                          |
| 2  | Sao Tome and Principe | Conflict and terrorism                          | 0 (0 to 0)       | 0 (0 to 0)       | NA                       |
| 3  | Sao Tome and Principe | Cyclist road injuries                           | 22 (13 to 32)    | 27 (17 to 39)    | 22% (12.6% to 32.7%)     |
| 4  | Sao Tome and Principe | Drowning                                        | 0 (0 to 0)       | 0 (0 to 0)       | 14% (5.5% to 25.2%)      |
| 5  | Sao Tome and Principe | Environmental heat and cold exposure            | 0 (0 to 1)       | 0 (0 to 1)       | 3.6% (-2% to 9.6%)       |
| 6  | Sao Tome and Principe | Executions and police conflict                  | 0 (0 to 0)       | 0 (0 to 0)       | NA                       |
| 7  | Sao Tome and Principe | Exposure to forces of nature                    | 0 (0 to 0)       | 0 (0 to 0)       | NA                       |
| 8  | Sao Tome and Principe | Falls                                           | 31 (21 to 47)    | 41 (27 to 61)    | 30.7% (25.2% to 36.6%)   |
| 9  | Sao Tome and Principe | Fire, heat, and hot substances                  | 0 (0 to 0)       | 0 (0 to 0)       | 6.3% (0.7% to 12.2%)     |
| 10 | Sao Tome and Principe | Foreign body in eyes                            | 0 (0 to 0)       | 0 (0 to 0)       | 0.7% (0% to 1.8%)        |
| 11 | Sao Tome and Principe | Foreign body in other body part                 | 3 (1 to 8)       | 3 (1 to 7)       | -1.8% (-6.9% to 3.7%)    |
| 12 | Sao Tome and Principe | Motor vehicle road injuries                     | 42 (29 to 58)    | 54 (38 to 74)    | 28.9% (20% to 38.6%)     |
| 13 | Sao Tome and Principe | Motorcyclist road injuries                      | 18 (12 to 25)    | 22 (15 to 31)    | 23.7% (14.3% to 33.9%)   |
| 14 | Sao Tome and Principe | Non-venomous animal contact                     | 3 (1 to 6)       | 3 (1 to 6)       | 2.1% (-2.1% to 6.9%)     |
| 15 | Sao Tome and Principe | Other exposure to mechanical forces             | 28 (14 to 50)    | 26 (13 to 46)    | -8.2% (-15.1% to -1.5%)  |
| 16 | Sao Tome and Principe | Other road injuries                             | 2 (1 to 4)       | 2 (1 to 4)       | 12.7% (4% to 22.9%)      |
| 17 | Sao Tome and Principe | Other transport injuries                        | 3 (2 to 4)       | 3 (2 to 4)       | 1.8% (-5.1% to 8.5%)     |
| 18 | Sao Tome and Principe | Other unintentional injuries                    | 3 (2 to 5)       | 3 (1 to 5)       | -7.9% (-14.9% to -1.1%)  |
| 19 | Sao Tome and Principe | Pedestrian road injuries                        | 44 (32 to 58)    | 51 (37 to 67)    | 17.1% (9.6% to 25.2%)    |
| 20 | Sao Tome and Principe | Physical violence by firearm                    | 0 (0 to 0)       | 0 (0 to 0)       | 67.3% (47.7% to 92.3%)   |
| 21 | Sao Tome and Principe | Physical violence by other means                | 8 (5 to 12)      | 9 (6 to 13)      | 11.5% (5.3% to 18.8%)    |
| 22 | Sao Tome and Principe | Physical violence by sharp object               | 2 (1 to 4)       | 2 (1 to 4)       | 9% (0.5% to 18.4%)       |
| 23 | Sao Tome and Principe | Poisoning by carbon monoxide                    | 0 (0 to 0)       | 0 (0 to 0)       | 20.6% (8.6% to 34%)      |
| 24 | Sao Tome and Principe | Poisoning by other means                        | 0 (0 to 0)       | 0 (0 to 0)       | -8% (-15.3% to -0.8%)    |
| 25 | Sao Tome and Principe | Pulmonary aspiration and foreign body in airway | 0 (0 to 0)       | 0 (0 to 0)       | -5.5% (-16% to 6.4%)     |
| 26 | Sao Tome and Principe | Self-harm by firearm                            | 0 (0 to 0)       | 0 (0 to 0)       | 44.8% (35.7% to 55.9%)   |
| 27 | Sao Tome and Principe | Self-harm by other specified means              | 0 (0 to 0)       | 0 (0 to 0)       | 38.3% (29.5% to 48.5%)   |
| 28 | Sao Tome and Principe | Unintentional firearm injuries                  | 1 (0 to 2)       | 1 (0 to 2)       | -9.9% (-18.3% to -1.1%)  |
| 29 | Sao Tome and Principe | Venomous animal contact                         | 0 (0 to 1)       | 0 (0 to 1)       | 2.5% (-4.1% to 9.7%)     |
| 30 | Saudi Arabia          | Adverse effects of medical treatment            | 0 (0 to 0)       | 0 (0 to 0)       | 0% (0% to 0%)            |
| 31 | Saudi Arabia          | Conflict and terrorism                          | 0 (0 to 0)       | 0 (0 to 0)       | NA                       |
| 32 | Saudi Arabia          | Cyclist road injuries                           | 17 (11 to 25)    | 15 (10 to 22)    | -11% (-20% to -1.6%)     |
| 33 | Saudi Arabia          | Drowning                                        | 0 (0 to 0)       | 0 (0 to 1)       | 105.2% (82.2% to 130.2%) |
| 34 | Saudi Arabia          | Environmental heat and cold exposure            | 3 (2 to 5)       | 3 (2 to 5)       | 2.9% (-1.6% to 7.3%)     |
| 35 | Saudi Arabia          | Executions and police conflict                  | 0 (0 to 0)       | 0 (0 to 0)       | NA                       |
| 36 | Saudi Arabia          | Exposure to forces of nature                    | 0 (0 to 0)       | 0 (0 to 0)       | NA                       |
| 37 | Saudi Arabia          | Falls                                           | 235 (184 to 303) | 373 (292 to 477) | 58.7% (52.2% to 65.8%)   |
| 38 | Saudi Arabia          | Fire, heat, and hot substances                  | 1 (0 to 1)       | 1 (0 to 1)       | 0.6% (-5.9% to 7.5%)     |
| 39 | Saudi Arabia          | Foreign body in eyes                            | 0 (0 to 0)       | 0 (0 to 0)       | 0.4% (0% to 1%)          |
| 40 | Saudi Arabia          | Foreign body in other body part                 | 1 (1 to 3)       | 1 (1 to 3)       | -1.1% (-5.5% to 3%)      |
| 41 | Saudi Arabia          | Motor vehicle road injuries                     | 80 (64 to 101)   | 93 (74 to 117)   | 15.9% (6.1% to 25.5%)    |
| 42 | Saudi Arabia          | Motorcyclist road injuries                      | 12 (9 to 16)     | 15 (11 to 19)    | 21.4% (7% to 38%)        |
| 43 | Saudi Arabia          | Non-venomous animal contact                     | 2 (1 to 4)       | 2 (1 to 4)       | 0.1% (-5.2% to 6%)       |
| 44 | Saudi Arabia          | Other exposure to mechanical forces             | 40 (25 to 63)    | 35 (21 to 54)    | -12.8% (-18.2% to -6.6%) |
| 45 |                       |                                                 |                  |                  |                          |
| 46 |                       |                                                 |                  |                  |                          |



|    |              |                                                 |               |               |                           |
|----|--------------|-------------------------------------------------|---------------|---------------|---------------------------|
| 1  |              |                                                 |               |               |                           |
| 2  | Saudi Arabia | Other road injuries                             | 2 (1 to 4)    | 2 (1 to 4)    | -0.1% (-11.3% to 12.1%)   |
| 3  | Saudi Arabia | Other transport injuries                        | 5 (4 to 7)    | 6 (4 to 8)    | 9.6% (3.1% to 17.7%)      |
| 4  | Saudi Arabia | Other unintentional injuries                    | 48 (31 to 75) | 31 (21 to 50) | -33.9% (-38% to -29.4%)   |
| 5  | Saudi Arabia | Pedestrian road injuries                        | 35 (26 to 44) | 31 (24 to 40) | -10.6% (-19% to -1.1%)    |
| 6  | Saudi Arabia | Physical violence by firearm                    | 0 (0 to 0)    | 1 (0 to 1)    | 112.5% (79.9% to 150.3%)  |
| 7  | Saudi Arabia | Physical violence by other means                | 10 (7 to 14)  | 11 (8 to 16)  | 8.6% (2.7% to 15.4%)      |
| 8  | Saudi Arabia | Physical violence by sharp object               | 1 (1 to 2)    | 1 (1 to 2)    | -22.5% (-31.8% to -13%)   |
| 9  | Saudi Arabia | Poisoning by carbon monoxide                    | 0 (0 to 0)    | 0 (0 to 0)    | 45.1% (29% to 64.4%)      |
| 10 | Saudi Arabia | Poisoning by other means                        | 0 (0 to 0)    | 0 (0 to 0)    | -18.5% (-26.2% to -10.9%) |
| 11 | Saudi Arabia | Pulmonary aspiration and foreign body in airway | 0 (0 to 1)    | 0 (0 to 1)    | 3.5% (-5% to 13.7%)       |
| 12 | Saudi Arabia | Self-harm by firearm                            | 0 (0 to 0)    | 0 (0 to 0)    | 85.5% (62.7% to 111.5%)   |
| 13 | Saudi Arabia | Self-harm by other specified means              | 1 (0 to 1)    | 1 (1 to 2)    | 94% (80% to 108.9%)       |
| 14 | Saudi Arabia | Unintentional firearm injuries                  | 3 (2 to 5)    | 2 (1 to 3)    | -31.6% (-39.4% to -23.3%) |
| 15 | Saudi Arabia | Venomous animal contact                         | 1 (0 to 3)    | 1 (1 to 3)    | 3.1% (-3.8% to 11.2%)     |
| 16 | Senegal      | Adverse effects of medical treatment            | 0 (0 to 0)    | 0 (0 to 0)    | 0% (0% to 0%)             |
| 17 | Senegal      | Conflict and terrorism                          | 6 (2 to 16)   | 0 (0 to 0)    | NA                        |
| 18 | Senegal      | Cyclist road injuries                           | 23 (14 to 34) | 26 (17 to 39) | 14% (6.4% to 22.9%)       |
| 19 | Senegal      | Drowning                                        | 0 (0 to 0)    | 0 (0 to 0)    | -8.2% (-15.3% to 0.1%)    |
| 20 | Senegal      | Environmental heat and cold exposure            | 0 (0 to 1)    | 0 (0 to 1)    | 0.3% (-5.8% to 6.1%)      |
| 21 | Senegal      | Executions and police conflict                  | 0 (0 to 0)    | 0 (0 to 0)    | NA                        |
| 22 | Senegal      | Exposure to forces of nature                    | 0 (0 to 0)    | 0 (0 to 0)    | NA                        |
| 23 | Senegal      | Falls                                           | 17 (11 to 26) | 20 (13 to 30) | 17% (12.5% to 21.3%)      |
| 24 | Senegal      | Fire, heat, and hot substances                  | 0 (0 to 0)    | 0 (0 to 0)    | -8.4% (-14.8% to -2.9%)   |
| 25 | Senegal      | Foreign body in eyes                            | 0 (0 to 0)    | 0 (0 to 0)    | -0.1% (-0.5% to 0.4%)     |
| 26 | Senegal      | Foreign body in other body part                 | 3 (1 to 7)    | 3 (1 to 7)    | -0.6% (-5.2% to 4.2%)     |
| 27 | Senegal      | Motor vehicle road injuries                     | 50 (35 to 69) | 59 (41 to 80) | 17.2% (9.2% to 26.5%)     |
| 28 | Senegal      | Motorcyclist road injuries                      | 15 (11 to 22) | 17 (12 to 24) | 9.7% (1.9% to 18.3%)      |
| 29 | Senegal      | Non-venomous animal contact                     | 3 (1 to 6)    | 3 (1 to 5)    | -9.3% (-13.8% to -4.2%)   |
| 30 | Senegal      | Other exposure to mechanical forces             | 25 (12 to 45) | 24 (12 to 43) | -5% (-11.1% to 1.3%)      |
| 31 | Senegal      | Other road injuries                             | 2 (1 to 4)    | 2 (1 to 4)    | 11.4% (2.9% to 20.9%)     |
| 32 | Senegal      | Other transport injuries                        | 3 (2 to 4)    | 3 (2 to 4)    | -5.8% (-13.3% to 1.9%)    |
| 33 | Senegal      | Other unintentional injuries                    | 3 (2 to 5)    | 2 (1 to 4)    | -10.7% (-16.5% to -4.9%)  |
| 34 | Senegal      | Pedestrian road injuries                        | 57 (42 to 74) | 52 (38 to 69) | -9.3% (-14.9% to -3.6%)   |
| 35 | Senegal      | Physical violence by firearm                    | 0 (0 to 0)    | 0 (0 to 0)    | 53.7% (30.8% to 81.1%)    |
| 36 | Senegal      | Physical violence by other means                | 4 (2 to 6)    | 4 (3 to 6)    | 4.7% (-0.5% to 10.5%)     |
| 37 | Senegal      | Physical violence by sharp object               | 1 (1 to 2)    | 1 (1 to 2)    | 4.6% (-2.7% to 12.2%)     |
| 38 | Senegal      | Poisoning by carbon monoxide                    | 0 (0 to 0)    | 0 (0 to 0)    | 10.1% (-1.1% to 23.3%)    |
| 39 | Senegal      | Poisoning by other means                        | 0 (0 to 0)    | 0 (0 to 0)    | -14.9% (-21.5% to -8.1%)  |
| 40 | Senegal      | Pulmonary aspiration and foreign body in airway | 0 (0 to 0)    | 0 (0 to 0)    | -7.6% (-15.8% to 1.5%)    |
| 41 | Senegal      | Self-harm by firearm                            | 0 (0 to 0)    | 0 (0 to 0)    | 16% (8.1% to 25%)         |
| 42 | Senegal      | Self-harm by other specified means              | 0 (0 to 0)    | 0 (0 to 0)    | 8% (2.4% to 13.9%)        |
| 43 | Senegal      | Unintentional firearm injuries                  | 1 (0 to 2)    | 1 (0 to 2)    | -12.1% (-19.8% to -4%)    |
| 44 | Senegal      | Venomous animal contact                         | 0 (0 to 1)    | 0 (0 to 1)    | -6.9% (-13.1% to 0.7%)    |
| 45 |              |                                                 |               |               |                           |
| 46 |              |                                                 |               |               |                           |

|    |            |                                                 |                  |                  |                           |
|----|------------|-------------------------------------------------|------------------|------------------|---------------------------|
| 1  |            |                                                 |                  |                  |                           |
| 2  | Serbia     | Adverse effects of medical treatment            | 0 (0 to 0)       | 0 (0 to 0)       | 0% (0% to 0%)             |
| 3  | Serbia     | Conflict and terrorism                          | 0 (0 to 0)       | 0 (0 to 0)       | NA                        |
| 4  | Serbia     | Cyclist road injuries                           | 82 (60 to 109)   | 62 (46 to 83)    | -23.9% (-32% to -15%)     |
| 5  | Serbia     | Drowning                                        | 0 (0 to 0)       | 0 (0 to 1)       | 92.1% (63.2% to 130.3%)   |
| 6  | Serbia     | Environmental heat and cold exposure            | 2 (1 to 2)       | 2 (1 to 2)       | -8% (-12.8% to -4%)       |
| 7  | Serbia     | Executions and police conflict                  | 0 (0 to 0)       | 0 (0 to 0)       | NA                        |
| 8  | Serbia     | Exposure to forces of nature                    | 0 (0 to 0)       | 0 (0 to 0)       | NA                        |
| 9  | Serbia     | Falls                                           | 175 (135 to 230) | 239 (181 to 318) | 36.7% (29.9% to 42.8%)    |
| 10 | Serbia     | Fire, heat, and hot substances                  | 4 (2 to 6)       | 4 (2 to 6)       | 0.7% (-5.9% to 7.6%)      |
| 11 | Serbia     | Foreign body in eyes                            | 0 (0 to 0)       | 0 (0 to 0)       | 0.9% (0.4% to 1.7%)       |
| 12 | Serbia     | Foreign body in other body part                 | 2 (1 to 5)       | 2 (1 to 5)       | 1.5% (-4.1% to 7%)        |
| 13 | Serbia     | Motor vehicle road injuries                     | 115 (89 to 146)  | 85 (65 to 107)   | -26.5% (-33.1% to -18.1%) |
| 14 | Serbia     | Motorcyclist road injuries                      | 19 (14 to 25)    | 13 (10 to 18)    | -28% (-37.8% to -17%)     |
| 15 | Serbia     | Non-venomous animal contact                     | 6 (3 to 11)      | 6 (3 to 11)      | -5.9% (-10.6% to -0.9%)   |
| 16 | Serbia     | Other exposure to mechanical forces             | 132 (82 to 208)  | 134 (81 to 212)  | 1% (-4.6% to 6.7%)        |
| 17 | Serbia     | Other road injuries                             | 2 (1 to 3)       | 1 (1 to 2)       | -11.9% (-21.5% to -0.8%)  |
| 18 | Serbia     | Other transport injuries                        | 7 (5 to 9)       | 6 (5 to 8)       | -10.8% (-18.2% to -3.2%)  |
| 19 | Serbia     | Other unintentional injuries                    | 37 (24 to 60)    | 29 (18 to 47)    | -23.3% (-31.3% to -15.1%) |
| 20 | Serbia     | Pedestrian road injuries                        | 44 (34 to 57)    | 28 (20 to 36)    | -37.2% (-44.2% to -29.8%) |
| 21 | Serbia     | Physical violence by firearm                    | 0 (0 to 1)       | 0 (0 to 1)       | -1.5% (-17.8% to 16.8%)   |
| 22 | Serbia     | Physical violence by other means                | 42 (29 to 59)    | 27 (19 to 38)    | -35.8% (-41.4% to -29.7%) |
| 23 | Serbia     | Physical violence by sharp object               | 3 (2 to 4)       | 2 (1 to 3)       | -31.2% (-40.4% to -21.6%) |
| 24 | Serbia     | Poisoning by carbon monoxide                    | 0 (0 to 0)       | 0 (0 to 0)       | 41.5% (29.6% to 56.2%)    |
| 25 | Serbia     | Poisoning by other means                        | 0 (0 to 1)       | 0 (0 to 1)       | 7.3% (-3.5% to 15.9%)     |
| 26 | Serbia     | Pulmonary aspiration and foreign body in airway | 1 (1 to 2)       | 1 (0 to 1)       | -15.1% (-24% to -7.2%)    |
| 27 | Serbia     | Self-harm by firearm                            | 1 (1 to 2)       | 1 (1 to 1)       | -13.9% (-23.3% to -2.1%)  |
| 28 | Serbia     | Self-harm by other specified means              | 3 (2 to 5)       | 2 (2 to 4)       | -31.7% (-36% to -27%)     |
| 29 | Serbia     | Unintentional firearm injuries                  | 1 (1 to 2)       | 1 (1 to 2)       | -13.4% (-22.3% to -5.1%)  |
| 30 | Serbia     | Venomous animal contact                         | 5 (2 to 10)      | 5 (2 to 9)       | -9.8% (-14.9% to -4.7%)   |
| 31 | Seychelles | Adverse effects of medical treatment            | 0 (0 to 0)       | 0 (0 to 0)       | 0% (0% to 0%)             |
| 32 | Seychelles | Conflict and terrorism                          | 0 (0 to 0)       | 0 (0 to 0)       | NA                        |
| 33 | Seychelles | Cyclist road injuries                           | 11 (6 to 18)     | 14 (9 to 22)     | 28.6% (16.1% to 42.4%)    |
| 34 | Seychelles | Drowning                                        | 0 (0 to 0)       | 0 (0 to 0)       | 11.1% (1% to 23.6%)       |
| 35 | Seychelles | Environmental heat and cold exposure            | 0 (0 to 0)       | 0 (0 to 0)       | 3.3% (-2.6% to 8.4%)      |
| 36 | Seychelles | Executions and police conflict                  | 0 (0 to 0)       | 0 (0 to 0)       | NA                        |
| 37 | Seychelles | Exposure to forces of nature                    | 0 (0 to 0)       | 0 (0 to 0)       | NA                        |
| 38 | Seychelles | Falls                                           | 30 (19 to 45)    | 35 (22 to 54)    | 17.3% (11.9% to 22.1%)    |
| 39 | Seychelles | Fire, heat, and hot substances                  | 0 (0 to 1)       | 0 (0 to 0)       | -30.3% (-35.4% to -24.9%) |
| 40 | Seychelles | Foreign body in eyes                            | 0 (0 to 0)       | 0 (0 to 0)       | 2.4% (1.1% to 4.1%)       |
| 41 | Seychelles | Foreign body in other body part                 | 1 (0 to 2)       | 1 (0 to 2)       | 1.1% (-3.4% to 6.1%)      |
| 42 | Seychelles | Motor vehicle road injuries                     | 29 (20 to 42)    | 37 (25 to 53)    | 26.8% (15.3% to 39.3%)    |
| 43 | Seychelles | Motorcyclist road injuries                      | 34 (25 to 46)    | 36 (26 to 49)    | 7.2% (-2.9% to 18.1%)     |
| 44 | Seychelles | Non-venomous animal contact                     | 2 (1 to 4)       | 2 (1 to 3)       | -16.5% (-20.3% to -11%)   |
| 45 |            |                                                 |                  |                  |                           |
| 46 |            |                                                 |                  |                  |                           |

|    |              |                                                 |               |               |                           |
|----|--------------|-------------------------------------------------|---------------|---------------|---------------------------|
| 1  |              |                                                 |               |               |                           |
| 2  | Seychelles   | Other exposure to mechanical forces             | 35 (18 to 65) | 28 (14 to 52) | -21.9% (-29.7% to -16.4%) |
| 3  | Seychelles   | Other road injuries                             | 2 (1 to 3)    | 2 (1 to 4)    | 25.6% (13.4% to 39.5%)    |
| 4  | Seychelles   | Other transport injuries                        | 3 (2 to 4)    | 3 (2 to 4)    | 1.1% (-6.2% to 7.1%)      |
| 5  | Seychelles   | Other unintentional injuries                    | 3 (2 to 6)    | 3 (2 to 5)    | -11.1% (-17.6% to -4.1%)  |
| 6  | Seychelles   | Pedestrian road injuries                        | 18 (13 to 25) | 21 (15 to 29) | 13.3% (4.5% to 22.5%)     |
| 7  | Seychelles   | Physical violence by firearm                    | 0 (0 to 1)    | 0 (0 to 1)    | 44.2% (29.8% to 60.6%)    |
| 8  | Seychelles   | Physical violence by other means                | 27 (18 to 41) | 23 (15 to 35) | -16% (-21.1% to -11.1%)   |
| 9  | Seychelles   | Physical violence by sharp object               | 5 (3 to 10)   | 4 (2 to 8)    | -20.3% (-28.1% to -13.1%) |
| 10 | Seychelles   | Poisoning by carbon monoxide                    | 0 (0 to 0)    | 0 (0 to 0)    | 9.8% (0.1% to 21.5%)      |
| 11 | Seychelles   | Poisoning by other means                        | 0 (0 to 0)    | 0 (0 to 0)    | -15.9% (-22.3% to -8.7%)  |
| 12 | Seychelles   | Pulmonary aspiration and foreign body in airway | 0 (0 to 0)    | 0 (0 to 0)    | -18.7% (-26.4% to -10.3%) |
| 13 | Seychelles   | Self-harm by firearm                            | 0 (0 to 0)    | 0 (0 to 0)    | 16% (1.2% to 34.7%)       |
| 14 | Seychelles   | Self-harm by other specified means              | 0 (0 to 0)    | 0 (0 to 0)    | 2.4% (-4.2% to 9.8%)      |
| 15 | Seychelles   | Unintentional firearm injuries                  | 1 (1 to 3)    | 1 (0 to 3)    | -10.9% (-20.6% to -0.9%)  |
| 16 | Sierra Leone | Venomous animal contact                         | 0 (0 to 1)    | 0 (0 to 1)    | -22.4% (-30.3% to -14.8%) |
| 17 | Sierra Leone | Adverse effects of medical treatment            | 0 (0 to 0)    | 0 (0 to 0)    | 0% (0% to 0%)             |
| 18 | Sierra Leone | Conflict and terrorism                          | 0 (0 to 0)    | 0 (0 to 0)    | NA                        |
| 19 | Sierra Leone | Cyclist road injuries                           | 25 (16 to 37) | 28 (17 to 41) | 12.8% (5.5% to 20.7%)     |
| 20 | Sierra Leone | Drowning                                        | 0 (0 to 0)    | 0 (0 to 0)    | -16.4% (-22.1% to -11%)   |
| 21 | Sierra Leone | Environmental heat and cold exposure            | 0 (0 to 1)    | 0 (0 to 1)    | 3% (-3.2% to 9.2%)        |
| 22 | Sierra Leone | Executions and police conflict                  | 0 (0 to 0)    | 0 (0 to 1)    | NA                        |
| 23 | Sierra Leone | Exposure to forces of nature                    | 0 (0 to 0)    | 0 (0 to 0)    | NA                        |
| 24 | Sierra Leone | Falls                                           | 17 (11 to 26) | 19 (12 to 29) | 9.8% (5.2% to 14.8%)      |
| 25 | Sierra Leone | Fire, heat, and hot substances                  | 0 (0 to 0)    | 0 (0 to 0)    | -6.6% (-12.2% to -0.2%)   |
| 26 | Sierra Leone | Foreign body in eyes                            | 0 (0 to 0)    | 0 (0 to 0)    | 0.1% (-0.2% to 0.5%)      |
| 27 | Sierra Leone | Foreign body in other body part                 | 4 (2 to 8)    | 3 (1 to 8)    | -3.6% (-8.6% to 1.8%)     |
| 28 | Sierra Leone | Motor vehicle road injuries                     | 49 (34 to 69) | 58 (40 to 81) | 18.6% (10.6% to 27.4%)    |
| 29 | Sierra Leone | Motorcyclist road injuries                      | 40 (29 to 53) | 41 (30 to 56) | 3.7% (-3.1% to 10%)       |
| 30 | Sierra Leone | Non-venomous animal contact                     | 3 (1 to 5)    | 3 (1 to 6)    | 1.1% (-3.6% to 6.1%)      |
| 31 | Sierra Leone | Other exposure to mechanical forces             | 25 (13 to 45) | 22 (11 to 40) | -12.1% (-17% to -7.5%)    |
| 32 | Sierra Leone | Other road injuries                             | 2 (1 to 4)    | 2 (1 to 4)    | 17.3% (7.2% to 27.2%)     |
| 33 | Sierra Leone | Other transport injuries                        | 3 (2 to 4)    | 3 (2 to 4)    | -7.1% (-12.4% to -1.3%)   |
| 34 | Sierra Leone | Other unintentional injuries                    | 3 (2 to 5)    | 2 (1 to 4)    | -18.7% (-23.8% to -13.1%) |
| 35 | Sierra Leone | Pedestrian road injuries                        | 32 (22 to 43) | 37 (26 to 50) | 15.8% (8% to 23.8%)       |
| 36 | Sierra Leone | Physical violence by firearm                    | 0 (0 to 0)    | 0 (0 to 0)    | 25.5% (10.8% to 42.8%)    |
| 37 | Sierra Leone | Physical violence by other means                | 4 (3 to 6)    | 4 (2 to 6)    | -7.1% (-12.4% to -1.5%)   |
| 38 | Sierra Leone | Physical violence by sharp object               | 1 (1 to 2)    | 1 (1 to 2)    | -3.9% (-10.5% to 2.7%)    |
| 39 | Sierra Leone | Poisoning by carbon monoxide                    | 0 (0 to 0)    | 0 (0 to 0)    | 4.5% (-6.3% to 17.2%)     |
| 40 | Sierra Leone | Poisoning by other means                        | 0 (0 to 0)    | 0 (0 to 0)    | -17.4% (-24.5% to -10.8%) |
| 41 | Sierra Leone | Pulmonary aspiration and foreign body in airway | 0 (0 to 0)    | 0 (0 to 0)    | -11.1% (-21.2% to -0.5%)  |
| 42 | Sierra Leone | Self-harm by firearm                            | 0 (0 to 0)    | 0 (0 to 0)    | 29.5% (21% to 38.1%)      |
| 43 | Sierra Leone | Self-harm by other specified means              | 0 (0 to 0)    | 0 (0 to 0)    | 35.4% (28.4% to 43%)      |
| 44 | Sierra Leone | Unintentional firearm injuries                  | 1 (0 to 2)    | 1 (0 to 2)    | -15.2% (-22.1% to -7.6%)  |
| 45 |              |                                                 |               |               |                           |
| 46 |              |                                                 |               |               |                           |

|    |              |                                                 |                  |                  |                           |
|----|--------------|-------------------------------------------------|------------------|------------------|---------------------------|
| 1  |              |                                                 |                  |                  |                           |
| 2  | Sierra Leone | Venomous animal contact                         | 0 (0 to 1)       | 0 (0 to 1)       | 4.1% (-3% to 11.7%)       |
| 3  | Singapore    | Adverse effects of medical treatment            | 0 (0 to 0)       | 0 (0 to 0)       | 0% (0% to 0%)             |
| 4  | Singapore    | Conflict and terrorism                          | 0 (0 to 0)       | 0 (0 to 0)       | NA                        |
| 5  | Singapore    | Cyclist road injuries                           | 21 (15 to 28)    | 17 (12 to 22)    | -20.8% (-30.4% to -9.8%)  |
| 6  | Singapore    | Drowning                                        | 0 (0 to 1)       | 1 (0 to 1)       | 136.6% (115.1% to 156.4%) |
| 7  | Singapore    | Environmental heat and cold exposure            | 5 (3 to 7)       | 5 (4 to 7)       | 9% (4.7% to 14.3%)        |
| 8  | Singapore    | Executions and police conflict                  | 0 (0 to 0)       | 0 (0 to 0)       | NA                        |
| 9  | Singapore    | Exposure to forces of nature                    | 0 (0 to 0)       | 0 (0 to 0)       | NA                        |
| 10 | Singapore    | Falls                                           | 153 (118 to 200) | 156 (119 to 206) | 1.9% (-3.5% to 7.1%)      |
| 11 | Singapore    | Fire, heat, and hot substances                  | 3 (2 to 5)       | 3 (2 to 5)       | 1.8% (-2.3% to 6.1%)      |
| 12 | Singapore    | Foreign body in eyes                            | 0 (0 to 0)       | 0 (0 to 0)       | 0.7% (0.1% to 1.7%)       |
| 13 | Singapore    | Foreign body in other body part                 | 2 (1 to 5)       | 2 (1 to 5)       | -4.5% (-7.7% to -1.1%)    |
| 14 | Singapore    | Motor vehicle road injuries                     | 20 (15 to 26)    | 17 (12 to 23)    | -17.1% (-28% to -5.7%)    |
| 15 | Singapore    | Motorcyclist road injuries                      | 17 (13 to 22)    | 10 (7 to 13)     | -41.9% (-52% to -30.8%)   |
| 16 | Singapore    | Non-venomous animal contact                     | 6 (3 to 10)      | 4 (2 to 7)       | -26.9% (-29.8% to -23.4%) |
| 17 | Singapore    | Other exposure to mechanical forces             | 76 (47 to 120)   | 68 (41 to 108)   | -11.3% (-18.2% to -5.1%)  |
| 18 | Singapore    | Other road injuries                             | 1 (1 to 2)       | 1 (0 to 2)       | -17.1% (-27.6% to -5.5%)  |
| 19 | Singapore    | Other transport injuries                        | 7 (5 to 9)       | 6 (5 to 9)       | -5.9% (-9.4% to -1.9%)    |
| 20 | Singapore    | Other unintentional injuries                    | 37 (24 to 58)    | 30 (19 to 49)    | -17.2% (-24.3% to -11.1%) |
| 21 | Singapore    | Pedestrian road injuries                        | 10 (7 to 13)     | 7 (5 to 9)       | -28% (-38.7% to -16.8%)   |
| 22 | Singapore    | Physical violence by firearm                    | 0 (0 to 1)       | 1 (0 to 1)       | 56.1% (34.5% to 82.5%)    |
| 23 | Singapore    | Physical violence by other means                | 17 (12 to 24)    | 13 (9 to 19)     | -22.7% (-31.6% to -13.4%) |
| 24 | Singapore    | Physical violence by sharp object               | 2 (1 to 3)       | 1 (1 to 2)       | -28% (-41% to -14.9%)     |
| 25 | Singapore    | Poisoning by carbon monoxide                    | 0 (0 to 0)       | 0 (0 to 0)       | 13.4% (4% to 23.1%)       |
| 26 | Singapore    | Poisoning by other means                        | 0 (0 to 1)       | 0 (0 to 0)       | -5.5% (-10.3% to -0.4%)   |
| 27 | Singapore    | Pulmonary aspiration and foreign body in airway | 1 (0 to 1)       | 0 (0 to 1)       | -14.6% (-21.3% to -7.3%)  |
| 28 | Singapore    | Self-harm by firearm                            | 0 (0 to 0)       | 0 (0 to 0)       | 11.2% (-5.2% to 33.1%)    |
| 29 | Singapore    | Self-harm by other specified means              | 4 (2 to 6)       | 2 (2 to 4)       | -35.1% (-38.7% to -31%)   |
| 30 | Singapore    | Unintentional firearm injuries                  | 1 (1 to 2)       | 1 (1 to 2)       | 1% (-8.8% to 11.1%)       |
| 31 | Slovakia     | Venomous animal contact                         | 2 (1 to 5)       | 2 (1 to 4)       | -24.9% (-29.1% to -19.8%) |
| 32 | Slovakia     | Adverse effects of medical treatment            | 0 (0 to 0)       | 0 (0 to 0)       | 0% (0% to 0%)             |
| 33 | Slovakia     | Conflict and terrorism                          | 0 (0 to 0)       | 0 (0 to 0)       | NA                        |
| 34 | Slovakia     | Cyclist road injuries                           | 87 (64 to 112)   | 61 (45 to 82)    | -29.5% (-38.3% to -20.8%) |
| 35 | Slovakia     | Drowning                                        | 0 (0 to 0)       | 1 (0 to 1)       | 79.7% (60.6% to 104.2%)   |
| 36 | Slovakia     | Environmental heat and cold exposure            | 3 (2 to 3)       | 2 (2 to 3)       | -7.3% (-11.7% to -2.8%)   |
| 37 | Slovakia     | Executions and police conflict                  | 0 (0 to 0)       | 0 (0 to 0)       | NA                        |
| 38 | Slovakia     | Exposure to forces of nature                    | 0 (0 to 0)       | 0 (0 to 0)       | NA                        |
| 39 | Slovakia     | Falls                                           | 352 (281 to 444) | 368 (290 to 466) | 4.4% (-0.2% to 9.2%)      |
| 40 | Slovakia     | Fire, heat, and hot substances                  | 4 (2 to 6)       | 4 (2 to 6)       | -4.1% (-9.7% to 1.5%)     |
| 41 | Slovakia     | Foreign body in eyes                            | 0 (0 to 0)       | 0 (0 to 0)       | 0.5% (0.2% to 1%)         |
| 42 | Slovakia     | Foreign body in other body part                 | 2 (1 to 5)       | 2 (1 to 5)       | 1.4% (-4.1% to 7.1%)      |
| 43 | Slovakia     | Motor vehicle road injuries                     | 124 (95 to 157)  | 93 (71 to 118)   | -25.2% (-34.1% to -15.7%) |
| 44 | Slovakia     | Motorcyclist road injuries                      | 19 (14 to 25)    | 15 (11 to 20)    | -18.4% (-30.3% to -6.1%)  |
| 45 |              |                                                 |                  |                  |                           |
| 46 |              |                                                 |                  |                  |                           |

|    |          |                                                 |                  |                  |                           |
|----|----------|-------------------------------------------------|------------------|------------------|---------------------------|
| 1  |          |                                                 |                  |                  |                           |
| 2  | Slovakia | Non-venomous animal contact                     | 6 (3 to 11)      | 5 (3 to 9)       | -21.9% (-26.3% to -17.9%) |
| 3  | Slovakia | Other exposure to mechanical forces             | 163 (104 to 256) | 148 (92 to 230)  | -9.5% (-17% to -2.9%)     |
| 4  | Slovakia | Other road injuries                             | 1 (1 to 2)       | 1 (1 to 2)       | -5% (-15.8% to 7.4%)      |
| 5  | Slovakia | Other transport injuries                        | 9 (7 to 12)      | 7 (5 to 10)      | -19.9% (-25.4% to -14.3%) |
| 6  | Slovakia | Other unintentional injuries                    | 31 (20 to 51)    | 28 (17 to 46)    | -10.2% (-15.8% to -3.9%)  |
| 7  | Slovakia | Pedestrian road injuries                        | 50 (39 to 64)    | 28 (21 to 37)    | -44% (-50.5% to -36.7%)   |
| 8  | Slovakia | Physical violence by firearm                    | 0 (0 to 0)       | 0 (0 to 1)       | 43.5% (24.9% to 62.9%)    |
| 9  | Slovakia | Physical violence by other means                | 32 (22 to 45)    | 26 (18 to 37)    | -17.5% (-24.6% to -10.4%) |
| 10 | Slovakia | Physical violence by sharp object               | 2 (1 to 4)       | 2 (1 to 3)       | -19.7% (-28.4% to -11.8%) |
| 11 | Slovakia | Poisoning by carbon monoxide                    | 0 (0 to 0)       | 0 (0 to 0)       | 27.2% (17% to 40%)        |
| 12 | Slovakia | Poisoning by other means                        | 0 (0 to 1)       | 0 (0 to 1)       | -2.7% (-10.3% to 4.4%)    |
| 13 | Slovakia | Pulmonary aspiration and foreign body in airway | 1 (1 to 2)       | 1 (1 to 2)       | -17.9% (-24.2% to -10.2%) |
| 14 | Slovakia | Self-harm by firearm                            | 1 (0 to 1)       | 1 (0 to 1)       | -8.5% (-20.8% to 4.9%)    |
| 15 | Slovakia | Self-harm by other specified means              | 3 (2 to 4)       | 2 (2 to 4)       | -13.1% (-18.7% to -7.5%)  |
| 16 | Slovakia | Unintentional firearm injuries                  | 1 (1 to 2)       | 1 (1 to 2)       | -16.5% (-26.5% to -7.1%)  |
| 17 | Slovakia | Venomous animal contact                         | 5 (2 to 9)       | 4 (2 to 8)       | -19% (-23.5% to -13.9%)   |
| 18 | Slovenia | Adverse effects of medical treatment            | 0 (0 to 0)       | 0 (0 to 0)       | 0% (0% to 0%)             |
| 19 | Slovenia | Conflict and terrorism                          | 0 (0 to 0)       | 0 (0 to 0)       | NA                        |
| 20 | Slovenia | Cyclist road injuries                           | 100 (72 to 132)  | 70 (50 to 94)    | -30.4% (-38.2% to -21.6%) |
| 21 | Slovenia | Drowning                                        | 0 (0 to 0)       | 1 (0 to 1)       | 141.3% (113.8% to 172.1%) |
| 22 | Slovenia | Environmental heat and cold exposure            | 2 (2 to 3)       | 2 (1 to 2)       | -36.5% (-42.8% to -30.5%) |
| 23 | Slovenia | Executions and police conflict                  | 0 (0 to 0)       | 0 (0 to 0)       | NA                        |
| 24 | Slovenia | Exposure to forces of nature                    | 0 (0 to 1)       | 0 (0 to 0)       | NA                        |
| 25 | Slovenia | Falls                                           | 397 (318 to 501) | 401 (320 to 504) | 1% (-3.9% to 6.1%)        |
| 26 | Slovenia | Fire, heat, and hot substances                  | 4 (2 to 6)       | 4 (2 to 7)       | 2.5% (-2.8% to 8%)        |
| 27 | Slovenia | Foreign body in eyes                            | 0 (0 to 0)       | 0 (0 to 0)       | 1.4% (0.6% to 2.7%)       |
| 28 | Slovenia | Foreign body in other body part                 | 3 (1 to 6)       | 3 (1 to 6)       | 2.2% (-3.4% to 8.5%)      |
| 29 | Slovenia | Motor vehicle road injuries                     | 213 (168 to 269) | 102 (78 to 129)  | -52% (-56.8% to -46.3%)   |
| 30 | Slovenia | Motorcyclist road injuries                      | 28 (21 to 37)    | 24 (18 to 32)    | -14.4% (-26.5% to 0.6%)   |
| 31 | Slovenia | Non-venomous animal contact                     | 6 (3 to 11)      | 5 (3 to 9)       | -15.7% (-20.2% to -10.5%) |
| 32 | Slovenia | Other exposure to mechanical forces             | 192 (122 to 298) | 166 (104 to 261) | -13.5% (-20.6% to -5.6%)  |
| 33 | Slovenia | Other road injuries                             | 2 (1 to 3)       | 1 (1 to 3)       | -12.6% (-23.6% to -1.1%)  |
| 34 | Slovenia | Other transport injuries                        | 7 (5 to 9)       | 7 (5 to 9)       | -3% (-8% to 2.2%)         |
| 35 | Slovenia | Other unintentional injuries                    | 32 (20 to 52)    | 35 (21 to 58)    | 8.6% (1.7% to 15.3%)      |
| 36 | Slovenia | Pedestrian road injuries                        | 45 (34 to 58)    | 27 (20 to 36)    | -39.8% (-48.6% to -29.4%) |
| 37 | Slovenia | Physical violence by firearm                    | 0 (0 to 1)       | 0 (0 to 1)       | 22.6% (6% to 41.2%)       |
| 38 | Slovenia | Physical violence by other means                | 30 (21 to 42)    | 24 (17 to 35)    | -18.4% (-26.5% to -10.4%) |
| 39 | Slovenia | Physical violence by sharp object               | 3 (2 to 5)       | 2 (1 to 3)       | -26% (-37.3% to -16%)     |
| 40 | Slovenia | Poisoning by carbon monoxide                    | 0 (0 to 0)       | 0 (0 to 0)       | 32% (21.5% to 43.6%)      |
| 41 | Slovenia | Poisoning by other means                        | 0 (0 to 1)       | 0 (0 to 1)       | 0.8% (-6.2% to 8.1%)      |
| 42 | Slovenia | Pulmonary aspiration and foreign body in airway | 1 (0 to 2)       | 1 (0 to 1)       | -4.6% (-12.3% to 4%)      |
| 43 | Slovenia | Self-harm by firearm                            | 1 (1 to 2)       | 1 (1 to 2)       | -23.9% (-33.6% to -12.6%) |
| 44 | Slovenia | Self-harm by other specified means              | 6 (4 to 9)       | 4 (2 to 5)       | -35.4% (-39.4% to -31.1%) |
| 45 |          |                                                 |                  |                  |                           |
| 46 |          |                                                 |                  |                  |                           |

|    |                 |                                                 |                 |                  |                          |
|----|-----------------|-------------------------------------------------|-----------------|------------------|--------------------------|
| 1  |                 |                                                 |                 |                  |                          |
| 2  | Slovenia        | Unintentional firearm injuries                  | 1 (1 to 2)      | 1 (1 to 2)       | 1.4% (-10.1% to 13.2%)   |
| 3  | Slovenia        | Venomous animal contact                         | 5 (2 to 9)      | 4 (2 to 8)       | -12.8% (-17.9% to -6.7%) |
| 4  | Solomon Islands | Adverse effects of medical treatment            | 0 (0 to 0)      | 0 (0 to 0)       | 0% (0% to 0%)            |
| 5  | Solomon Islands | Conflict and terrorism                          | 0 (0 to 0)      | 0 (0 to 0)       | NA                       |
| 6  | Solomon Islands | Cyclist road injuries                           | 10 (6 to 14)    | 10 (7 to 15)     | 6.5% (-0.7% to 14%)      |
| 7  | Solomon Islands | Drowning                                        | 1 (0 to 1)      | 1 (0 to 1)       | 0.3% (-9.5% to 11.3%)    |
| 8  | Solomon Islands | Environmental heat and cold exposure            | 2 (2 to 3)      | 2 (2 to 3)       | -5.3% (-11% to 0.3%)     |
| 9  | Solomon Islands | Executions and police conflict                  | 0 (0 to 0)      | 0 (0 to 0)       | NA                       |
| 10 | Solomon Islands | Exposure to forces of nature                    | 0 (0 to 0)      | 0 (0 to 0)       | NA                       |
| 11 | Solomon Islands | Falls                                           | 95 (74 to 124)  | 132 (103 to 170) | 39.3% (34.2% to 44.9%)   |
| 12 | Solomon Islands | Fire, heat, and hot substances                  | 2 (1 to 3)      | 1 (1 to 2)       | -10.8% (-17.5% to -4.7%) |
| 13 | Solomon Islands | Foreign body in eyes                            | 0 (0 to 0)      | 0 (0 to 0)       | -1.9% (-3.2% to -1%)     |
| 14 | Solomon Islands | Foreign body in other body part                 | 1 (0 to 1)      | 1 (0 to 1)       | -2.4% (-6.3% to 2.2%)    |
| 15 | Solomon Islands | Motor vehicle road injuries                     | 23 (17 to 31)   | 23 (17 to 29)    | -3.3% (-10.2% to 4.2%)   |
| 16 | Solomon Islands | Motorcyclist road injuries                      | 17 (13 to 22)   | 18 (14 to 24)    | 5.2% (-3.9% to 14.5%)    |
| 17 | Solomon Islands | Non-venomous animal contact                     | 6 (3 to 10)     | 5 (3 to 9)       | -16% (-20.6% to -11.4%)  |
| 18 | Solomon Islands | Other exposure to mechanical forces             | 11 (6 to 19)    | 10 (6 to 17)     | -11.9% (-16.9% to -6.9%) |
| 19 | Solomon Islands | Other road injuries                             | 1 (1 to 2)      | 1 (1 to 2)       | 4.8% (-4.1% to 14.7%)    |
| 20 | Solomon Islands | Other transport injuries                        | 8 (7 to 11)     | 8 (6 to 10)      | -9.4% (-13.9% to -5.2%)  |
| 21 | Solomon Islands | Other unintentional injuries                    | 10 (6 to 16)    | 9 (6 to 15)      | -7.5% (-12.4% to -2.1%)  |
| 22 | Solomon Islands | Pedestrian road injuries                        | 17 (12 to 21)   | 17 (12 to 22)    | 0.2% (-6.9% to 8.1%)     |
| 23 | Solomon Islands | Physical violence by firearm                    | 0 (0 to 0)      | 0 (0 to 0)       | -7.6% (-19.6% to 5.4%)   |
| 24 | Solomon Islands | Physical violence by other means                | 30 (21 to 42)   | 21 (15 to 31)    | -28.2% (-33% to -23.4%)  |
| 25 | Solomon Islands | Physical violence by sharp object               | 3 (2 to 5)      | 2 (1 to 4)       | -32.9% (-40% to -25.5%)  |
| 26 | Solomon Islands | Poisoning by carbon monoxide                    | 0 (0 to 0)      | 0 (0 to 0)       | 28.3% (15.4% to 43.5%)   |
| 27 | Solomon Islands | Poisoning by other means                        | 0 (0 to 0)      | 0 (0 to 0)       | -1.5% (-9.8% to 7.1%)    |
| 28 | Solomon Islands | Pulmonary aspiration and foreign body in airway | 0 (0 to 0)      | 0 (0 to 0)       | -2.7% (-13% to 9.4%)     |
| 29 | Solomon Islands | Self-harm by firearm                            | 1 (1 to 2)      | 1 (1 to 2)       | -0.1% (-13.3% to 12.7%)  |
| 30 | Solomon Islands | Self-harm by other specified means              | 2 (1 to 4)      | 3 (2 to 4)       | 19% (9.6% to 29.9%)      |
| 31 | Solomon Islands | Unintentional firearm injuries                  | 2 (1 to 3)      | 2 (1 to 3)       | -14.4% (-20.5% to -8%)   |
| 32 | Solomon Islands | Venomous animal contact                         | 3 (1 to 6)      | 3 (1 to 5)       | -10.2% (-15.8% to -3.2%) |
| 33 | Somalia         | Adverse effects of medical treatment            | 0 (0 to 0)      | 0 (0 to 0)       | 0% (0% to 0%)            |
| 34 | Somalia         | Conflict and terrorism                          | 177 (54 to 466) | 38 (12 to 96)    | NA                       |
| 35 | Somalia         | Cyclist road injuries                           | 29 (19 to 43)   | 33 (22 to 48)    | 11.6% (3.5% to 20.6%)    |
| 36 | Somalia         | Drowning                                        | 0 (0 to 0)      | 0 (0 to 0)       | -12.4% (-17.7% to -6.8%) |
| 37 | Somalia         | Environmental heat and cold exposure            | 0 (0 to 1)      | 0 (0 to 1)       | -3.7% (-8.8% to 1.3%)    |
| 38 | Somalia         | Executions and police conflict                  | 0 (0 to 0)      | 1 (0 to 3)       | NA                       |
| 39 | Somalia         | Exposure to forces of nature                    | 0 (0 to 0)      | 0 (0 to 0)       | NA                       |
| 40 | Somalia         | Falls                                           | 20 (12 to 31)   | 22 (14 to 34)    | 10.8% (6.8% to 14.8%)    |
| 41 | Somalia         | Fire, heat, and hot substances                  | 0 (0 to 1)      | 0 (0 to 1)       | -11% (-16.1% to -6.4%)   |
| 42 | Somalia         | Foreign body in eyes                            | 0 (0 to 0)      | 0 (0 to 0)       | -0.9% (-2.2% to -0.1%)   |
| 43 | Somalia         | Foreign body in other body part                 | 3 (1 to 7)      | 3 (1 to 7)       | -4.1% (-10.5% to 1.7%)   |
| 44 | Somalia         | Motor vehicle road injuries                     | 35 (24 to 50)   | 33 (22 to 47)    | -7.5% (-15% to 0.4%)     |
| 45 |                 |                                                 |                 |                  |                          |
| 46 |                 |                                                 |                 |                  |                          |

|    |              |                                                 |               |               |                           |
|----|--------------|-------------------------------------------------|---------------|---------------|---------------------------|
| 1  |              |                                                 |               |               |                           |
| 2  | Somalia      | Motorcyclist road injuries                      | 20 (14 to 27) | 23 (17 to 32) | 20.3% (11.2% to 29.9%)    |
| 3  | Somalia      | Non-venomous animal contact                     | 9 (4 to 17)   | 9 (4 to 18)   | 3.5% (-1% to 8.9%)        |
| 4  | Somalia      | Other exposure to mechanical forces             | 28 (14 to 50) | 27 (13 to 49) | -4.4% (-9% to 2%)         |
| 5  | Somalia      | Other road injuries                             | 1 (1 to 2)    | 1 (1 to 2)    | -5.6% (-13.3% to 3%)      |
| 6  | Somalia      | Other transport injuries                        | 3 (2 to 4)    | 3 (2 to 5)    | 6.9% (1.3% to 12.2%)      |
| 7  | Somalia      | Other unintentional injuries                    | 3 (2 to 5)    | 3 (2 to 5)    | -11.3% (-15.8% to -6.4%)  |
| 8  | Somalia      | Pedestrian road injuries                        | 61 (45 to 81) | 54 (39 to 71) | -12% (-17.1% to -6.2%)    |
| 9  | Somalia      | Physical violence by firearm                    | 0 (0 to 0)    | 0 (0 to 0)    | 27% (15.9% to 37.9%)      |
| 10 | Somalia      | Physical violence by other means                | 8 (6 to 13)   | 10 (6 to 14)  | 14.7% (6.7% to 22.9%)     |
| 11 | Somalia      | Physical violence by sharp object               | 2 (1 to 4)    | 3 (1 to 5)    | 22.2% (12.4% to 32.9%)    |
| 12 | Somalia      | Poisoning by carbon monoxide                    | 0 (0 to 0)    | 0 (0 to 0)    | -0.3% (-10.3% to 11.3%)   |
| 13 | Somalia      | Poisoning by other means                        | 0 (0 to 0)    | 0 (0 to 0)    | -15.5% (-21.7% to -8.6%)  |
| 14 | Somalia      | Pulmonary aspiration and foreign body in airway | 0 (0 to 0)    | 0 (0 to 0)    | -8.8% (-19.1% to 3.3%)    |
| 15 | Somalia      | Self-harm by firearm                            | 0 (0 to 0)    | 0 (0 to 0)    | 8% (-0.1% to 17.4%)       |
| 16 | Somalia      | Self-harm by other specified means              | 0 (0 to 0)    | 0 (0 to 0)    | 1.2% (-4.1% to 7.1%)      |
| 17 | Somalia      | Unintentional firearm injuries                  | 1 (1 to 3)    | 1 (1 to 3)    | -4.2% (-10.7% to 3.5%)    |
| 18 | Somalia      | Venomous animal contact                         | 2 (0 to 5)    | 2 (0 to 5)    | 5.9% (-0.8% to 13.4%)     |
| 19 | South Africa | Adverse effects of medical treatment            | 0 (0 to 0)    | 0 (0 to 0)    | 0% (0% to 0%)             |
| 20 | South Africa | Conflict and terrorism                          | 4 (1 to 11)   | 0 (0 to 1)    | NA                        |
| 21 | South Africa | Cyclist road injuries                           | 13 (7 to 20)  | 12 (7 to 19)  | -5% (-11.1% to 1.1%)      |
| 22 | South Africa | Drowning                                        | 0 (0 to 0)    | 0 (0 to 0)    | -36% (-42% to -28.5%)     |
| 23 | South Africa | Environmental heat and cold exposure            | 0 (0 to 1)    | 0 (0 to 1)    | -4.3% (-9.4% to 0.6%)     |
| 24 | South Africa | Executions and police conflict                  | 0 (0 to 0)    | 0 (0 to 0)    | NA                        |
| 25 | South Africa | Exposure to forces of nature                    | 0 (0 to 0)    | 0 (0 to 0)    | NA                        |
| 26 | South Africa | Falls                                           | 22 (13 to 34) | 20 (12 to 32) | -5.8% (-9.1% to -2.5%)    |
| 27 | South Africa | Fire, heat, and hot substances                  | 0 (0 to 0)    | 0 (0 to 0)    | -33.4% (-37.6% to -29%)   |
| 28 | South Africa | Foreign body in eyes                            | 0 (0 to 0)    | 0 (0 to 0)    | 0.2% (-0.1% to 0.7%)      |
| 29 | South Africa | Foreign body in other body part                 | 5 (2 to 10)   | 5 (2 to 10)   | 2.4% (0.1% to 4.9%)       |
| 30 | South Africa | Motor vehicle road injuries                     | 54 (36 to 75) | 40 (27 to 56) | -26% (-30.5% to -21.3%)   |
| 31 | South Africa | Motorcyclist road injuries                      | 13 (9 to 20)  | 11 (7 to 16)  | -20.4% (-25.4% to -15.6%) |
| 32 | South Africa | Non-venomous animal contact                     | 3 (1 to 5)    | 3 (1 to 5)    | -6.6% (-12.4% to -0.7%)   |
| 33 | South Africa | Other exposure to mechanical forces             | 32 (16 to 59) | 26 (13 to 46) | -21.3% (-25.4% to -16.5%) |
| 34 | South Africa | Other road injuries                             | 2 (1 to 3)    | 2 (1 to 3)    | -1.8% (-8% to 4.8%)       |
| 35 | South Africa | Other transport injuries                        | 4 (3 to 5)    | 4 (2 to 5)    | -3.3% (-9.3% to 2%)       |
| 36 | South Africa | Other unintentional injuries                    | 2 (1 to 4)    | 2 (1 to 4)    | -12.8% (-18.5% to -7.8%)  |
| 37 | South Africa | Pedestrian road injuries                        | 47 (34 to 65) | 37 (26 to 50) | -22.7% (-27.6% to -18%)   |
| 38 | South Africa | Physical violence by firearm                    | 2 (1 to 3)    | 1 (0 to 1)    | -56.8% (-64.6% to -45.5%) |
| 39 | South Africa | Physical violence by other means                | 41 (26 to 65) | 25 (15 to 38) | -40.3% (-43.6% to -36.9%) |
| 40 | South Africa | Physical violence by sharp object               | 12 (6 to 22)  | 8 (4 to 15)   | -35.2% (-39.8% to -29.7%) |
| 41 | South Africa | Poisoning by carbon monoxide                    | 0 (0 to 0)    | 0 (0 to 0)    | -8.5% (-31.6% to 12.3%)   |
| 42 | South Africa | Poisoning by other means                        | 0 (0 to 0)    | 0 (0 to 0)    | -28.5% (-45.6% to -9.8%)  |
| 43 | South Africa | Pulmonary aspiration and foreign body in airway | 0 (0 to 0)    | 0 (0 to 0)    | -16.4% (-23.3% to -10.7%) |
| 44 | South Africa | Self-harm by firearm                            | 0 (0 to 0)    | 0 (0 to 0)    | -18.6% (-26.3% to -8.7%)  |
| 45 |              |                                                 |               |               |                           |
| 46 |              |                                                 |               |               |                           |

|    |              |                                                 |                  |                  |                           |
|----|--------------|-------------------------------------------------|------------------|------------------|---------------------------|
| 1  |              |                                                 |                  |                  |                           |
| 2  | South Africa | Self-harm by other specified means              | 0 (0 to 1)       | 0 (0 to 0)       | -32.8% (-37.7% to -27.3%) |
| 3  | South Africa | Unintentional firearm injuries                  | 1 (0 to 1)       | 1 (0 to 1)       | -10.3% (-18.4% to -1.2%)  |
| 4  | South Africa | Venomous animal contact                         | 0 (0 to 1)       | 0 (0 to 1)       | -0.1% (-10.1% to 10.3%)   |
| 5  | South Sudan  | Adverse effects of medical treatment            | 0 (0 to 0)       | 0 (0 to 0)       | 0% (0% to 0%)             |
| 6  | South Sudan  | Conflict and terrorism                          | 0 (0 to 0)       | 23 (7 to 59)     | NA                        |
| 7  | South Sudan  | Cyclist road injuries                           | 34 (22 to 50)    | 32 (21 to 48)    | -7.2% (-13.1% to -0.8%)   |
| 8  | South Sudan  | Drowning                                        | 0 (0 to 0)       | 0 (0 to 0)       | -11.6% (-17.9% to -5.1%)  |
| 9  | South Sudan  | Environmental heat and cold exposure            | 0 (0 to 1)       | 0 (0 to 1)       | -6.7% (-11.5% to -1.7%)   |
| 10 | South Sudan  | Executions and police conflict                  | 0 (0 to 0)       | 0 (0 to 1)       | NA                        |
| 11 | South Sudan  | Exposure to forces of nature                    | 0 (0 to 0)       | 0 (0 to 0)       | NA                        |
| 12 | South Sudan  | Falls                                           | 21 (13 to 33)    | 23 (14 to 36)    | 8.7% (4.9% to 13.3%)      |
| 13 | South Sudan  | Fire, heat, and hot substances                  | 0 (0 to 1)       | 0 (0 to 1)       | -10.7% (-15.2% to -7%)    |
| 14 | South Sudan  | Foreign body in eyes                            | 0 (0 to 0)       | 0 (0 to 0)       | -1.6% (-3.9% to -0.1%)    |
| 15 | South Sudan  | Foreign body in other body part                 | 3 (1 to 7)       | 3 (1 to 7)       | -5.9% (-10.7% to -1.3%)   |
| 16 | South Sudan  | Motor vehicle road injuries                     | 50 (33 to 71)    | 44 (29 to 62)    | -12% (-18.1% to -5.6%)    |
| 17 | South Sudan  | Motorcyclist road injuries                      | 20 (14 to 29)    | 19 (13 to 26)    | -9% (-15.3% to -2.2%)     |
| 18 | South Sudan  | Non-venomous animal contact                     | 6 (3 to 12)      | 6 (3 to 11)      | -10.9% (-14.9% to -7.1%)  |
| 19 | South Sudan  | Other exposure to mechanical forces             | 36 (18 to 66)    | 33 (16 to 61)    | -7.8% (-12.1% to -3.5%)   |
| 20 | South Sudan  | Other road injuries                             | 2 (1 to 4)       | 2 (1 to 3)       | -8.5% (-16% to -0.3%)     |
| 21 | South Sudan  | Other transport injuries                        | 3 (2 to 4)       | 3 (2 to 4)       | -4% (-8.2% to 0.5%)       |
| 22 | South Sudan  | Other unintentional injuries                    | 3 (2 to 5)       | 3 (2 to 5)       | -12.6% (-16.4% to -8.5%)  |
| 23 | South Sudan  | Pedestrian road injuries                        | 80 (60 to 105)   | 65 (48 to 85)    | -19.2% (-24.3% to -13.9%) |
| 24 | South Sudan  | Physical violence by firearm                    | 0 (0 to 0)       | 0 (0 to 0)       | 55.5% (41.7% to 71.1%)    |
| 25 | South Sudan  | Physical violence by other means                | 9 (6 to 14)      | 13 (9 to 20)     | 49.4% (37.3% to 62.5%)    |
| 26 | South Sudan  | Physical violence by sharp object               | 2 (1 to 4)       | 4 (2 to 7)       | 50.4% (37.2% to 65%)      |
| 27 | South Sudan  | Poisoning by carbon monoxide                    | 0 (0 to 0)       | 0 (0 to 0)       | 3.4% (-5.3% to 13.9%)     |
| 28 | South Sudan  | Poisoning by other means                        | 0 (0 to 0)       | 0 (0 to 0)       | -15.7% (-21.9% to -9.9%)  |
| 29 | South Sudan  | Pulmonary aspiration and foreign body in airway | 0 (0 to 0)       | 0 (0 to 0)       | -6.7% (-16.8% to 3.6%)    |
| 30 | South Sudan  | Self-harm by firearm                            | 0 (0 to 0)       | 0 (0 to 0)       | -6% (-12.1% to 1.1%)      |
| 31 | South Sudan  | Self-harm by other specified means              | 0 (0 to 0)       | 0 (0 to 0)       | -12.2% (-17.5% to -6.8%)  |
| 32 | South Sudan  | Unintentional firearm injuries                  | 1 (0 to 2)       | 1 (0 to 2)       | -12.6% (-18.6% to -6.7%)  |
| 33 | South Sudan  | Venomous animal contact                         | 1 (0 to 3)       | 1 (0 to 3)       | -9.9% (-16.8% to -3.5%)   |
| 34 | Spain        | Adverse effects of medical treatment            | 0 (0 to 0)       | 0 (0 to 0)       | 0% (0% to 0%)             |
| 35 | Spain        | Conflict and terrorism                          | 1 (0 to 2)       | 0 (0 to 0)       | NA                        |
| 36 | Spain        | Cyclist road injuries                           | 27 (19 to 37)    | 19 (14 to 26)    | -30% (-40.6% to -17%)     |
| 37 | Spain        | Drowning                                        | 0 (0 to 0)       | 0 (0 to 0)       | 35.7% (21.1% to 49%)      |
| 38 | Spain        | Environmental heat and cold exposure            | 2 (2 to 3)       | 2 (1 to 3)       | -1.6% (-6.2% to 2.9%)     |
| 39 | Spain        | Executions and police conflict                  | 0 (0 to 0)       | 0 (0 to 0)       | NA                        |
| 40 | Spain        | Exposure to forces of nature                    | 0 (0 to 0)       | 0 (0 to 0)       | NA                        |
| 41 | Spain        | Falls                                           | 184 (143 to 240) | 227 (174 to 296) | 23% (15.3% to 31.3%)      |
| 42 | Spain        | Fire, heat, and hot substances                  | 2 (1 to 3)       | 2 (1 to 3)       | -4.6% (-9.2% to 1.1%)     |
| 43 | Spain        | Foreign body in eyes                            | 0 (0 to 0)       | 0 (0 to 0)       | 0.4% (0.1% to 0.8%)       |
| 44 | Spain        | Foreign body in other body part                 | 2 (1 to 3)       | 2 (1 to 3)       | 2.1% (-2.1% to 6.8%)      |
| 45 |              |                                                 |                  |                  |                           |
| 46 |              |                                                 |                  |                  |                           |



|    |           |                                                 |                 |                  |                           |
|----|-----------|-------------------------------------------------|-----------------|------------------|---------------------------|
| 1  |           |                                                 |                 |                  |                           |
| 2  | Spain     | Motor vehicle road injuries                     | 63 (49 to 78)   | 21 (15 to 27)    | -66.7% (-72.3% to -60.6%) |
| 3  | Spain     | Motorcyclist road injuries                      | 16 (12 to 21)   | 10 (7 to 13)     | -42.1% (-53% to -29.2%)   |
| 4  | Spain     | Non-venomous animal contact                     | 3 (1 to 4)      | 2 (1 to 4)       | -14.1% (-18.7% to -9.9%)  |
| 5  | Spain     | Other exposure to mechanical forces             | 52 (32 to 82)   | 43 (25 to 69)    | -18% (-26.5% to -10.7%)   |
| 6  | Spain     | Other road injuries                             | 2 (1 to 3)      | 1 (1 to 2)       | -27.1% (-38.9% to -13.2%) |
| 7  | Spain     | Other transport injuries                        | 5 (4 to 7)      | 5 (3 to 7)       | -11.6% (-17.2% to -5.5%)  |
| 8  | Spain     | Other unintentional injuries                    | 31 (20 to 49)   | 21 (13 to 34)    | -30.7% (-37.5% to -24.3%) |
| 9  | Spain     | Pedestrian road injuries                        | 18 (14 to 23)   | 7 (5 to 9)       | -64% (-70.5% to -56.4%)   |
| 10 | Spain     | Physical violence by firearm                    | 0 (0 to 1)      | 1 (0 to 1)       | 43.4% (28.2% to 60.7%)    |
| 11 | Spain     | Physical violence by other means                | 12 (8 to 17)    | 11 (7 to 16)     | -12.4% (-20.4% to -5.1%)  |
| 12 | Spain     | Physical violence by sharp object               | 1 (1 to 2)      | 1 (1 to 2)       | -8.4% (-20.3% to 2%)      |
| 13 | Spain     | Poisoning by carbon monoxide                    | 0 (0 to 0)      | 0 (0 to 0)       | 1.8% (-7.6% to 10.9%)     |
| 14 | Spain     | Poisoning by other means                        | 0 (0 to 0)      | 0 (0 to 0)       | -10.7% (-17.3% to -4.7%)  |
| 15 | Spain     | Pulmonary aspiration and foreign body in airway | 1 (1 to 2)      | 1 (1 to 2)       | -11% (-20.4% to -1.5%)    |
| 16 | Spain     | Self-harm by firearm                            | 0 (0 to 0)      | 0 (0 to 0)       | 7.3% (-5.5% to 21.6%)     |
| 17 | Spain     | Self-harm by other specified means              | 2 (1 to 3)      | 2 (1 to 2)       | -11.5% (-16.6% to -6%)    |
| 18 | Spain     | Unintentional firearm injuries                  | 1 (1 to 2)      | 1 (1 to 2)       | -27.2% (-37.8% to -17.8%) |
| 19 | Sri Lanka | Venomous animal contact                         | 1 (0 to 2)      | 1 (0 to 2)       | -14.3% (-19.5% to -8.8%)  |
| 20 | Sri Lanka | Adverse effects of medical treatment            | 0 (0 to 0)      | 0 (0 to 0)       | 0% (0% to 0%)             |
| 21 | Sri Lanka | Conflict and terrorism                          | 214 (86 to 487) | 8 (3 to 18)      | NA                        |
| 22 | Sri Lanka | Cyclist road injuries                           | 13 (9 to 18)    | 13 (9 to 19)     | 3.6% (-5.3% to 13.6%)     |
| 23 | Sri Lanka | Drowning                                        | 0 (0 to 1)      | 1 (0 to 1)       | 25.3% (13.4% to 38.4%)    |
| 24 | Sri Lanka | Environmental heat and cold exposure            | 2 (2 to 3)      | 2 (1 to 3)       | -16.4% (-22.6% to -9.3%)  |
| 25 | Sri Lanka | Executions and police conflict                  | 0 (0 to 0)      | 0 (0 to 0)       | NA                        |
| 26 | Sri Lanka | Exposure to forces of nature                    | 1 (1 to 2)      | 0 (0 to 0)       | NA                        |
| 27 | Sri Lanka | Falls                                           | 86 (69 to 109)  | 130 (104 to 160) | 49.9% (42.8% to 57.2%)    |
| 28 | Sri Lanka | Fire, heat, and hot substances                  | 2 (1 to 3)      | 1 (1 to 3)       | -27% (-32.7% to -21.6%)   |
| 29 | Sri Lanka | Foreign body in eyes                            | 0 (0 to 0)      | 0 (0 to 0)       | -2.2% (-3.5% to -1.3%)    |
| 30 | Sri Lanka | Foreign body in other body part                 | 1 (1 to 2)      | 1 (1 to 2)       | -5.3% (-9.2% to -0.8%)    |
| 31 | Sri Lanka | Motor vehicle road injuries                     | 21 (16 to 28)   | 23 (17 to 30)    | 6.5% (-2.1% to 16.5%)     |
| 32 | Sri Lanka | Motorcyclist road injuries                      | 30 (23 to 38)   | 34 (27 to 43)    | 14.9% (5.4% to 27%)       |
| 33 | Sri Lanka | Non-venomous animal contact                     | 7 (4 to 12)     | 4 (2 to 7)       | -45.8% (-51.2% to -39.8%) |
| 34 | Sri Lanka | Other exposure to mechanical forces             | 25 (15 to 40)   | 19 (11 to 31)    | -23% (-30% to -16.5%)     |
| 35 | Sri Lanka | Other road injuries                             | 1 (1 to 2)      | 1 (1 to 2)       | 2.7% (-6.9% to 12.6%)     |
| 36 | Sri Lanka | Other transport injuries                        | 5 (3 to 7)      | 5 (3 to 7)       | 7.2% (-0.1% to 15.5%)     |
| 37 | Sri Lanka | Other unintentional injuries                    | 18 (12 to 28)   | 10 (6 to 16)     | -44.8% (-51.3% to -37.5%) |
| 38 | Sri Lanka | Pedestrian road injuries                        | 16 (12 to 20)   | 14 (11 to 18)    | -11.3% (-17.7% to -4%)    |
| 39 | Sri Lanka | Physical violence by firearm                    | 0 (0 to 0)      | 0 (0 to 1)       | 34.1% (15.9% to 54.1%)    |
| 40 | Sri Lanka | Physical violence by other means                | 27 (19 to 38)   | 20 (14 to 29)    | -25.9% (-32.6% to -19.7%) |
| 41 | Sri Lanka | Physical violence by sharp object               | 4 (3 to 6)      | 3 (2 to 4)       | -33.5% (-42.2% to -24.9%) |
| 42 | Sri Lanka | Poisoning by carbon monoxide                    | 0 (0 to 0)      | 0 (0 to 0)       | 9.4% (-2.5% to 22.2%)     |
| 43 | Sri Lanka | Poisoning by other means                        | 0 (0 to 0)      | 0 (0 to 0)       | -25.7% (-34.1% to -17%)   |
| 44 | Sri Lanka | Pulmonary aspiration and foreign body in airway | 0 (0 to 0)      | 0 (0 to 0)       | -5.3% (-13.7% to 4.5%)    |
| 45 |           |                                                 |                 |                  |                           |
| 46 |           |                                                 |                 |                  |                           |

|    |           |                                                 |                 |               |                           |
|----|-----------|-------------------------------------------------|-----------------|---------------|---------------------------|
| 1  |           |                                                 |                 |               |                           |
| 2  | Sri Lanka | Self-harm by firearm                            | 0 (0 to 0)      | 0 (0 to 0)    | -37.8% (-54.1% to -19.2%) |
| 3  | Sri Lanka | Self-harm by other specified means              | 8 (5 to 12)     | 4 (3 to 7)    | -44.5% (-48.2% to -40.4%) |
| 4  | Sri Lanka | Unintentional firearm injuries                  | 4 (2 to 6)      | 2 (1 to 4)    | -41% (-50% to -32.8%)     |
| 5  | Sri Lanka | Venomous animal contact                         | 2 (1 to 4)      | 1 (0 to 2)    | -51.1% (-57.5% to -44.4%) |
| 6  | Sudan     | Adverse effects of medical treatment            | 0 (0 to 0)      | 0 (0 to 0)    | 0% (0% to 0%)             |
| 7  | Sudan     | Conflict and terrorism                          | 119 (37 to 307) | 1 (0 to 3)    | NA                        |
| 8  | Sudan     | Cyclist road injuries                           | 7 (4 to 11)     | 7 (5 to 11)   | 4.8% (-2.7% to 13.8%)     |
| 9  | Sudan     | Drowning                                        | 0 (0 to 0)      | 0 (0 to 0)    | -11.6% (-21% to -0.6%)    |
| 10 | Sudan     | Environmental heat and cold exposure            | 0 (0 to 1)      | 1 (0 to 1)    | 2.9% (-3.9% to 10.6%)     |
| 11 | Sudan     | Executions and police conflict                  | 0 (0 to 0)      | 2 (1 to 5)    | NA                        |
| 12 | Sudan     | Exposure to forces of nature                    | 0 (0 to 0)      | 0 (0 to 0)    | NA                        |
| 13 | Sudan     | Falls                                           | 33 (20 to 51)   | 40 (25 to 62) | 21.4% (15.8% to 27%)      |
| 14 | Sudan     | Fire, heat, and hot substances                  | 0 (0 to 0)      | 0 (0 to 0)    | -33% (-37.9% to -28.4%)   |
| 15 | Sudan     | Foreign body in eyes                            | 0 (0 to 0)      | 0 (0 to 0)    | 0.5% (0% to 1.1%)         |
| 16 | Sudan     | Foreign body in other body part                 | 2 (1 to 3)      | 2 (1 to 3)    | -1.5% (-5.7% to 3.1%)     |
| 17 | Sudan     | Motor vehicle road injuries                     | 31 (22 to 42)   | 28 (20 to 38) | -8.9% (-14.8% to -2.7%)   |
| 18 | Sudan     | Motorcyclist road injuries                      | 12 (8 to 16)    | 12 (8 to 16)  | -1.2% (-9.3% to 7.7%)     |
| 19 | Sudan     | Non-venomous animal contact                     | 3 (1 to 5)      | 2 (1 to 5)    | -8.4% (-13.1% to -2.8%)   |
| 20 | Sudan     | Other exposure to mechanical forces             | 39 (20 to 70)   | 34 (18 to 63) | -10.6% (-16.7% to -5.5%)  |
| 21 | Sudan     | Other road injuries                             | 1 (1 to 2)      | 1 (1 to 3)    | 12.2% (3.9% to 23.1%)     |
| 22 | Sudan     | Other transport injuries                        | 2 (2 to 3)      | 2 (2 to 3)    | 1.7% (-4.3% to 7.6%)      |
| 23 | Sudan     | Other unintentional injuries                    | 7 (4 to 12)     | 5 (3 to 9)    | -24.7% (-28.7% to -20.2%) |
| 24 | Sudan     | Pedestrian road injuries                        | 23 (17 to 31)   | 18 (13 to 25) | -21% (-26.5% to -15.1%)   |
| 25 | Sudan     | Physical violence by firearm                    | 0 (0 to 0)      | 0 (0 to 1)    | 169.7% (127.7% to 235.4%) |
| 26 | Sudan     | Physical violence by other means                | 7 (5 to 11)     | 12 (8 to 19)  | 75.9% (55.4% to 100.8%)   |
| 27 | Sudan     | Physical violence by sharp object               | 1 (0 to 2)      | 1 (1 to 3)    | 40.9% (18.9% to 71.6%)    |
| 28 | Sudan     | Poisoning by carbon monoxide                    | 0 (0 to 0)      | 0 (0 to 0)    | 17.2% (2.8% to 33.6%)     |
| 29 | Sudan     | Poisoning by other means                        | 0 (0 to 0)      | 0 (0 to 0)    | -29.4% (-36.6% to -22.1%) |
| 30 | Sudan     | Pulmonary aspiration and foreign body in airway | 0 (0 to 0)      | 0 (0 to 0)    | -30.4% (-39.3% to -21.8%) |
| 31 | Sudan     | Self-harm by firearm                            | 0 (0 to 0)      | 0 (0 to 0)    | 21.9% (12.8% to 31.9%)    |
| 32 | Sudan     | Self-harm by other specified means              | 0 (0 to 0)      | 0 (0 to 0)    | -1.4% (-8% to 5.6%)       |
| 33 | Sudan     | Unintentional firearm injuries                  | 1 (0 to 2)      | 1 (0 to 1)    | -12.3% (-20.6% to -3.4%)  |
| 34 | Sudan     | Venomous animal contact                         | 1 (0 to 2)      | 1 (0 to 2)    | -12.2% (-19.7% to -5.3%)  |
| 35 | Suriname  | Adverse effects of medical treatment            | 0 (0 to 0)      | 0 (0 to 0)    | 0% (0% to 0%)             |
| 36 | Suriname  | Conflict and terrorism                          | 0 (0 to 0)      | 0 (0 to 0)    | NA                        |
| 37 | Suriname  | Cyclist road injuries                           | 36 (26 to 49)   | 30 (21 to 40) | -18.3% (-26.9% to -8.6%)  |
| 38 | Suriname  | Drowning                                        | 0 (0 to 1)      | 0 (0 to 1)    | 6.6% (-3.3% to 18.3%)     |
| 39 | Suriname  | Environmental heat and cold exposure            | 13 (9 to 18)    | 14 (10 to 19) | 5.8% (1.5% to 9.8%)       |
| 40 | Suriname  | Executions and police conflict                  | 0 (0 to 0)      | 0 (0 to 0)    | NA                        |
| 41 | Suriname  | Exposure to forces of nature                    | 0 (0 to 0)      | 0 (0 to 0)    | NA                        |
| 42 | Suriname  | Falls                                           | 43 (34 to 55)   | 63 (49 to 81) | 46% (40.4% to 51.5%)      |
| 43 | Suriname  | Fire, heat, and hot substances                  | 4 (3 to 7)      | 4 (2 to 6)    | -10.7% (-17% to -3.9%)    |
| 44 | Suriname  | Foreign body in eyes                            | 0 (0 to 0)      | 0 (0 to 0)    | -0.5% (-1.1% to -0.1%)    |
| 45 |           |                                                 |                 |               |                           |
| 46 |           |                                                 |                 |               |                           |

|    |          |                                                 |                 |                 |                           |
|----|----------|-------------------------------------------------|-----------------|-----------------|---------------------------|
| 1  |          |                                                 |                 |                 |                           |
| 2  | Suriname | Foreign body in other body part                 | 2 (1 to 3)      | 2 (1 to 3)      | 4.1% (-3.7% to 10.4%)     |
| 3  | Suriname | Motor vehicle road injuries                     | 37 (27 to 47)   | 34 (25 to 43)   | -8.7% (-17.5% to 0.9%)    |
| 4  | Suriname | Motorcyclist road injuries                      | 21 (16 to 27)   | 27 (21 to 35)   | 31.9% (17% to 48.9%)      |
| 5  | Suriname | Non-venomous animal contact                     | 3 (1 to 5)      | 3 (2 to 5)      | 7% (-0.9% to 14.8%)       |
| 6  | Suriname | Other exposure to mechanical forces             | 32 (19 to 52)   | 37 (22 to 61)   | 15.3% (8.2% to 22.7%)     |
| 7  | Suriname | Other road injuries                             | 4 (2 to 6)      | 4 (2 to 6)      | 3% (-8.1% to 15.3%)       |
| 8  | Suriname | Other transport injuries                        | 5 (3 to 6)      | 5 (4 to 7)      | 10.5% (4.1% to 17.1%)     |
| 9  | Suriname | Other unintentional injuries                    | 12 (7 to 19)    | 12 (8 to 20)    | 2.4% (-3% to 7.3%)        |
| 10 | Suriname | Pedestrian road injuries                        | 15 (11 to 19)   | 12 (9 to 15)    | -20.3% (-27.6% to -12.2%) |
| 11 | Suriname | Physical violence by firearm                    | 0 (0 to 1)      | 1 (1 to 1)      | 86.4% (68.5% to 106.7%)   |
| 12 | Suriname | Physical violence by other means                | 11 (8 to 16)    | 12 (9 to 18)    | 13.3% (5.5% to 21.4%)     |
| 13 | Suriname | Physical violence by sharp object               | 3 (2 to 5)      | 3 (2 to 6)      | 12.4% (1.3% to 23.4%)     |
| 14 | Suriname | Poisoning by carbon monoxide                    | 0 (0 to 0)      | 0 (0 to 0)      | 26% (11.1% to 42.4%)      |
| 15 | Suriname | Poisoning by other means                        | 0 (0 to 0)      | 0 (0 to 0)      | -15.2% (-25.3% to -4.7%)  |
| 16 | Suriname | Pulmonary aspiration and foreign body in airway | 1 (0 to 1)      | 0 (0 to 1)      | -24.9% (-33.1% to -14.4%) |
| 17 | Suriname | Self-harm by firearm                            | 1 (0 to 1)      | 1 (0 to 1)      | 13.8% (-1.7% to 30.2%)    |
| 18 | Suriname | Self-harm by other specified means              | 2 (1 to 3)      | 2 (1 to 3)      | 2.9% (-4.5% to 10.9%)     |
| 19 | Suriname | Unintentional firearm injuries                  | 4 (2 to 6)      | 4 (2 to 6)      | 10.9% (0.6% to 21.7%)     |
| 20 | Sweden   | Venomous animal contact                         | 5 (3 to 9)      | 6 (3 to 11)     | 19.4% (11.6% to 30.2%)    |
| 21 | Sweden   | Adverse effects of medical treatment            | 0 (0 to 0)      | 0 (0 to 0)      | 0% (0% to 0%)             |
| 22 | Sweden   | Conflict and terrorism                          | 0 (0 to 0)      | 0 (0 to 0)      | NA                        |
| 23 | Sweden   | Cyclist road injuries                           | 19 (12 to 27)   | 12 (7 to 18)    | -36.8% (-41.6% to -32.1%) |
| 24 | Sweden   | Drowning                                        | 0 (0 to 0)      | 0 (0 to 0)      | -7.5% (-13.4% to -0.8%)   |
| 25 | Sweden   | Environmental heat and cold exposure            | 1 (0 to 1)      | 1 (0 to 1)      | -13.1% (-17.4% to -8.8%)  |
| 26 | Sweden   | Executions and police conflict                  | 0 (0 to 0)      | 0 (0 to 0)      | NA                        |
| 27 | Sweden   | Exposure to forces of nature                    | 0 (0 to 0)      | 0 (0 to 0)      | NA                        |
| 28 | Sweden   | Falls                                           | 117 (75 to 174) | 129 (83 to 194) | 10.5% (7% to 13.8%)       |
| 29 | Sweden   | Fire, heat, and hot substances                  | 1 (0 to 1)      | 0 (0 to 1)      | -22.2% (-26% to -18.1%)   |
| 30 | Sweden   | Foreign body in eyes                            | 0 (0 to 0)      | 0 (0 to 0)      | 0% (-0.5% to 0.8%)        |
| 31 | Sweden   | Foreign body in other body part                 | 2 (1 to 5)      | 2 (1 to 5)      | 0.7% (-2.8% to 4.4%)      |
| 32 | Sweden   | Motor vehicle road injuries                     | 35 (24 to 48)   | 17 (11 to 25)   | -51% (-54.8% to -47.1%)   |
| 33 | Sweden   | Motorcyclist road injuries                      | 12 (8 to 17)    | 9 (6 to 13)     | -19% (-24.6% to -12.6%)   |
| 34 | Sweden   | Non-venomous animal contact                     | 2 (1 to 4)      | 2 (1 to 3)      | -10% (-13.1% to -6.8%)    |
| 35 | Sweden   | Other exposure to mechanical forces             | 90 (45 to 164)  | 77 (38 to 141)  | -14.6% (-19.4% to -10.6%) |
| 36 | Sweden   | Other road injuries                             | 2 (1 to 3)      | 2 (1 to 3)      | -14.9% (-21.3% to -7.7%)  |
| 37 | Sweden   | Other transport injuries                        | 4 (3 to 5)      | 3 (2 to 4)      | -27.6% (-31.7% to -22.5%) |
| 38 | Sweden   | Other unintentional injuries                    | 8 (5 to 15)     | 8 (4 to 15)     | -3% (-6.5% to 0.4%)       |
| 39 | Sweden   | Pedestrian road injuries                        | 8 (5 to 12)     | 6 (4 to 8)      | -29.1% (-35.2% to -22.8%) |
| 40 | Sweden   | Physical violence by firearm                    | 0 (0 to 1)      | 1 (0 to 1)      | 30.1% (19.4% to 41.8%)    |
| 41 | Sweden   | Physical violence by other means                | 19 (12 to 28)   | 20 (13 to 29)   | 4.7% (-0.3% to 9.1%)      |
| 42 | Sweden   | Physical violence by sharp object               | 2 (1 to 4)      | 2 (1 to 4)      | -4% (-11% to 2.6%)        |
| 43 | Sweden   | Poisoning by carbon monoxide                    | 0 (0 to 0)      | 0 (0 to 0)      | 12.9% (4.2% to 22.6%)     |
| 44 | Sweden   | Poisoning by other means                        | 0 (0 to 0)      | 0 (0 to 0)      | -33% (-39.2% to -27.5%)   |
| 45 |          |                                                 |                 |                 |                           |
| 46 |          |                                                 |                 |                 |                           |

|    |                      |                                                 |                  |                  |                           |
|----|----------------------|-------------------------------------------------|------------------|------------------|---------------------------|
| 1  |                      |                                                 |                  |                  |                           |
| 2  | Sweden               | Pulmonary aspiration and foreign body in airway | 0 (0 to 1)       | 0 (0 to 1)       | -15.4% (-21.6% to -8.4%)  |
| 3  | Sweden               | Self-harm by firearm                            | 0 (0 to 0)       | 0 (0 to 0)       | -35% (-40.3% to -30.3%)   |
| 4  | Sweden               | Self-harm by other specified means              | 1 (0 to 1)       | 0 (0 to 1)       | -23.6% (-27.4% to -19.4%) |
| 5  | Sweden               | Unintentional firearm injuries                  | 1 (0 to 1)       | 1 (0 to 1)       | 2.6% (-4.6% to 9.8%)      |
| 6  | Sweden               | Venomous animal contact                         | 0 (0 to 1)       | 0 (0 to 1)       | -9.6% (-14.7% to -4.3%)   |
| 7  | Switzerland          | Adverse effects of medical treatment            | 0 (0 to 0)       | 0 (0 to 0)       | 0% (0% to 0%)             |
| 8  | Switzerland          | Conflict and terrorism                          | 0 (0 to 0)       | 0 (0 to 0)       | NA                        |
| 9  | Switzerland          | Cyclist road injuries                           | 34 (25 to 45)    | 21 (15 to 29)    | -37.5% (-45.7% to -28.3%) |
| 10 | Switzerland          | Drowning                                        | 0 (0 to 0)       | 0 (0 to 0)       | 33.7% (19.5% to 46.7%)    |
| 11 | Switzerland          | Environmental heat and cold exposure            | 2 (1 to 2)       | 2 (1 to 2)       | 1.8% (-2.5% to 7%)        |
| 12 | Switzerland          | Executions and police conflict                  | 0 (0 to 0)       | 0 (0 to 0)       | NA                        |
| 13 | Switzerland          | Exposure to forces of nature                    | 0 (0 to 0)       | 0 (0 to 0)       | NA                        |
| 14 | Switzerland          | Falls                                           | 407 (326 to 517) | 365 (286 to 466) | -10.4% (-15% to -5.9%)    |
| 15 | Switzerland          | Fire, heat, and hot substances                  | 2 (1 to 4)       | 2 (1 to 4)       | 2.6% (-2.8% to 7.6%)      |
| 16 | Switzerland          | Foreign body in eyes                            | 0 (0 to 0)       | 0 (0 to 0)       | 0.5% (0.1% to 1.1%)       |
| 17 | Switzerland          | Foreign body in other body part                 | 1 (1 to 3)       | 1 (1 to 3)       | 5.2% (0% to 10.3%)        |
| 18 | Switzerland          | Motor vehicle road injuries                     | 39 (29 to 50)    | 20 (15 to 26)    | -48.3% (-55.4% to -39.9%) |
| 19 | Switzerland          | Motorcyclist road injuries                      | 21 (16 to 26)    | 11 (8 to 14)     | -48.9% (-57.1% to -39.9%) |
| 20 | Switzerland          | Non-venomous animal contact                     | 3 (2 to 5)       | 3 (2 to 5)       | 3.4% (-1.7% to 8.6%)      |
| 21 | Switzerland          | Other exposure to mechanical forces             | 81 (51 to 127)   | 56 (34 to 89)    | -30.6% (-39.1% to -23.3%) |
| 22 | Switzerland          | Other road injuries                             | 1 (1 to 2)       | 1 (1 to 2)       | -24.5% (-34.5% to -12.3%) |
| 23 | Switzerland          | Other transport injuries                        | 8 (6 to 10)      | 5 (4 to 7)       | -32.6% (-39.1% to -24.2%) |
| 24 | Switzerland          | Other unintentional injuries                    | 36 (25 to 54)    | 21 (13 to 34)    | -42.1% (-49.9% to -34.9%) |
| 25 | Switzerland          | Pedestrian road injuries                        | 12 (9 to 15)     | 7 (5 to 9)       | -45.1% (-53.8% to -35.5%) |
| 26 | Switzerland          | Physical violence by firearm                    | 1 (0 to 1)       | 1 (0 to 1)       | 16.1% (1.5% to 33.2%)     |
| 27 | Switzerland          | Physical violence by other means                | 16 (11 to 23)    | 13 (9 to 19)     | -16.9% (-24.3% to -9.3%)  |
| 28 | Switzerland          | Physical violence by sharp object               | 2 (1 to 3)       | 1 (1 to 2)       | -17.2% (-26.6% to -7.4%)  |
| 29 | Switzerland          | Poisoning by carbon monoxide                    | 0 (0 to 0)       | 0 (0 to 0)       | 16.2% (7% to 25.2%)       |
| 30 | Switzerland          | Poisoning by other means                        | 0 (0 to 0)       | 0 (0 to 0)       | 6.1% (-1% to 13.2%)       |
| 31 | Switzerland          | Pulmonary aspiration and foreign body in airway | 1 (0 to 1)       | 1 (0 to 1)       | 2.8% (-6% to 12.9%)       |
| 32 | Switzerland          | Self-harm by firearm                            | 1 (1 to 2)       | 0 (0 to 1)       | -67.3% (-72.8% to -61.8%) |
| 33 | Switzerland          | Self-harm by other specified means              | 5 (3 to 8)       | 3 (2 to 4)       | -44.3% (-48.2% to -40.2%) |
| 34 | Switzerland          | Unintentional firearm injuries                  | 1 (1 to 2)       | 1 (0 to 2)       | -25% (-36.4% to -14.1%)   |
| 35 | Switzerland          | Venomous animal contact                         | 1 (0 to 2)       | 1 (0 to 2)       | -1.2% (-7.2% to 5.1%)     |
| 36 | Syrian Arab Republic | Adverse effects of medical treatment            | 0 (0 to 0)       | 0 (0 to 0)       | 0% (0% to 0%)             |
| 37 | Syrian Arab Republic | Conflict and terrorism                          | 3 (1 to 6)       | 180 (68 to 394)  | NA                        |
| 38 | Syrian Arab Republic | Cyclist road injuries                           | 14 (10 to 20)    | 13 (9 to 18)     | -7.4% (-14.3% to 0.4%)    |
| 39 | Syrian Arab Republic | Drowning                                        | 0 (0 to 0)       | 0 (0 to 0)       | 102.1% (67.5% to 142.3%)  |
| 40 | Syrian Arab Republic | Environmental heat and cold exposure            | 3 (2 to 4)       | 3 (2 to 4)       | -4.2% (-9.2% to 1.1%)     |
| 41 | Syrian Arab Republic | Executions and police conflict                  | 0 (0 to 0)       | 5 (2 to 11)      | NA                        |
| 42 | Syrian Arab Republic | Exposure to forces of nature                    | 0 (0 to 0)       | 0 (0 to 0)       | NA                        |
| 43 | Syrian Arab Republic | Falls                                           | 70 (53 to 93)    | 102 (76 to 139)  | 46.6% (40% to 53.9%)      |
| 44 | Syrian Arab Republic | Fire, heat, and hot substances                  | 1 (0 to 1)       | 1 (0 to 1)       | -14.2% (-25.2% to -3%)    |
| 45 |                      |                                                 |                  |                  |                           |
| 46 |                      |                                                 |                  |                  |                           |

|    |                            |                                                 |                 |               |                           |
|----|----------------------------|-------------------------------------------------|-----------------|---------------|---------------------------|
| 1  |                            |                                                 |                 |               |                           |
| 2  | Syrian Arab Republic       | Foreign body in eyes                            | 0 (0 to 0)      | 0 (0 to 0)    | -1.8% (-3.5% to -0.8%)    |
| 3  | Syrian Arab Republic       | Foreign body in other body part                 | 1 (1 to 3)      | 1 (1 to 3)    | -4.9% (-9.6% to 0.2%)     |
| 4  | Syrian Arab Republic       | Motor vehicle road injuries                     | 24 (19 to 31)   | 19 (15 to 25) | -21.6% (-27.6% to -15%)   |
| 5  | Syrian Arab Republic       | Motorcyclist road injuries                      | 8 (6 to 11)     | 7 (6 to 10)   | -8.2% (-16.5% to 0.6%)    |
| 6  | Syrian Arab Republic       | Non-venomous animal contact                     | 4 (2 to 8)      | 4 (2 to 8)    | 4.3% (-1.2% to 9%)        |
| 7  | Syrian Arab Republic       | Other exposure to mechanical forces             | 21 (13 to 35)   | 20 (12 to 34) | -4.9% (-14.8% to 3.8%)    |
| 8  | Syrian Arab Republic       | Other road injuries                             | 2 (1 to 3)      | 2 (1 to 3)    | -5.4% (-14.1% to 3.9%)    |
| 9  | Syrian Arab Republic       | Other transport injuries                        | 6 (4 to 8)      | 6 (4 to 8)    | -2.6% (-8.1% to 2.7%)     |
| 10 | Syrian Arab Republic       | Other unintentional injuries                    | 17 (11 to 28)   | 16 (10 to 27) | -6.6% (-15.4% to 2.7%)    |
| 11 | Syrian Arab Republic       | Pedestrian road injuries                        | 19 (15 to 24)   | 14 (11 to 18) | -28.8% (-33.6% to -22.6%) |
| 12 | Syrian Arab Republic       | Physical violence by firearm                    | 0 (0 to 0)      | 1 (0 to 1)    | 167% (134.9% to 203.3%)   |
| 13 | Syrian Arab Republic       | Physical violence by other means                | 10 (7 to 14)    | 11 (8 to 16)  | 9.9% (2% to 17%)          |
| 14 | Syrian Arab Republic       | Physical violence by sharp object               | 2 (1 to 3)      | 2 (1 to 3)    | 0% (-10% to 10.6%)        |
| 15 | Syrian Arab Republic       | Poisoning by carbon monoxide                    | 0 (0 to 0)      | 0 (0 to 0)    | 39.5% (25.3% to 54.9%)    |
| 16 | Syrian Arab Republic       | Poisoning by other means                        | 0 (0 to 0)      | 0 (0 to 0)    | -9.8% (-17.8% to -1%)     |
| 17 | Syrian Arab Republic       | Pulmonary aspiration and foreign body in airway | 0 (0 to 1)      | 0 (0 to 1)    | -21.3% (-30.4% to -12.5%) |
| 18 | Syrian Arab Republic       | Self-harm by firearm                            | 0 (0 to 0)      | 0 (0 to 0)    | 26.5% (13.7% to 41.7%)    |
| 19 | Syrian Arab Republic       | Self-harm by other specified means              | 1 (0 to 1)      | 1 (0 to 1)    | 13.8% (7.2% to 20.5%)     |
| 20 | Syrian Arab Republic       | Unintentional firearm injuries                  | 2 (1 to 3)      | 2 (1 to 3)    | -6% (-19.7% to 8.5%)      |
| 21 | Syrian Arab Republic       | Venomous animal contact                         | 2 (1 to 5)      | 3 (1 to 5)    | 6.1% (-0.8% to 13%)       |
| 22 | Taiwan (Province of China) | Adverse effects of medical treatment            | 0 (0 to 0)      | 0 (0 to 0)    | 0% (0% to 0%)             |
| 23 | Taiwan (Province of China) | Conflict and terrorism                          | 0 (0 to 0)      | 0 (0 to 0)    | NA                        |
| 24 | Taiwan (Province of China) | Cyclist road injuries                           | 12 (8 to 18)    | 17 (12 to 23) | 34.6% (13.4% to 62.6%)    |
| 25 | Taiwan (Province of China) | Drowning                                        | 1 (0 to 1)      | 1 (0 to 1)    | 3.2% (-10.7% to 24.1%)    |
| 26 | Taiwan (Province of China) | Environmental heat and cold exposure            | 2 (2 to 4)      | 3 (2 to 4)    | 5.6% (-0.3% to 12.3%)     |
| 27 | Taiwan (Province of China) | Executions and police conflict                  | 0 (0 to 0)      | 0 (0 to 0)    | NA                        |
| 28 | Taiwan (Province of China) | Exposure to forces of nature                    | 0 (0 to 0)      | 0 (0 to 0)    | NA                        |
| 29 | Taiwan (Province of China) | Falls                                           | 106 (85 to 134) | 69 (56 to 87) | -34.7% (-38% to -31.4%)   |
| 30 | Taiwan (Province of China) | Fire, heat, and hot substances                  | 1 (1 to 2)      | 1 (0 to 1)    | -43.2% (-52.6% to -34.8%) |
| 31 | Taiwan (Province of China) | Foreign body in eyes                            | 0 (0 to 0)      | 0 (0 to 0)    | -1.8% (-3.1% to -0.9%)    |
| 32 | Taiwan (Province of China) | Foreign body in other body part                 | 0 (0 to 1)      | 0 (0 to 1)    | 3.7% (-1.9% to 10.1%)     |
| 33 | Taiwan (Province of China) | Motor vehicle road injuries                     | 49 (39 to 61)   | 15 (11 to 20) | -69.5% (-74.5% to -63.9%) |
| 34 | Taiwan (Province of China) | Motorcyclist road injuries                      | 23 (18 to 30)   | 35 (28 to 42) | 49% (26.1% to 78.5%)      |
| 35 | Taiwan (Province of China) | Non-venomous animal contact                     | 1 (1 to 2)      | 1 (0 to 1)    | -23.6% (-27.7% to -18.7%) |
| 36 | Taiwan (Province of China) | Other exposure to mechanical forces             | 5 (3 to 8)      | 7 (4 to 11)   | 36.2% (25.2% to 47.1%)    |
| 37 | Taiwan (Province of China) | Other road injuries                             | 1 (0 to 1)      | 2 (1 to 3)    | 93.9% (59% to 142.4%)     |
| 38 | Taiwan (Province of China) | Other transport injuries                        | 4 (3 to 5)      | 4 (3 to 6)    | 13.5% (7% to 21.2%)       |
| 39 | Taiwan (Province of China) | Other unintentional injuries                    | 11 (8 to 16)    | 3 (2 to 5)    | -71% (-77.2% to -64.5%)   |
| 40 | Taiwan (Province of China) | Pedestrian road injuries                        | 15 (11 to 19)   | 12 (9 to 15)  | -17.7% (-29.5% to -3.9%)  |
| 41 | Taiwan (Province of China) | Physical violence by firearm                    | 0 (0 to 1)      | 1 (0 to 1)    | 39.3% (22.4% to 57.5%)    |
| 42 | Taiwan (Province of China) | Physical violence by other means                | 21 (15 to 29)   | 16 (12 to 23) | -21.7% (-31.1% to -12.1%) |
| 43 | Taiwan (Province of China) | Physical violence by sharp object               | 4 (3 to 7)      | 2 (1 to 4)    | -51.8% (-61.9% to -40.5%) |
| 44 | Taiwan (Province of China) | Poisoning by carbon monoxide                    | 0 (0 to 0)      | 0 (0 to 0)    | 64.5% (38% to 98.2%)      |
| 45 |                            |                                                 |                 |               |                           |
| 46 |                            |                                                 |                 |               |                           |

|    |                            |                                                 |                  |                 |                           |
|----|----------------------------|-------------------------------------------------|------------------|-----------------|---------------------------|
| 1  |                            |                                                 |                  |                 |                           |
| 2  | Taiwan (Province of China) | Poisoning by other means                        | 0 (0 to 0)       | 0 (0 to 0)      | -42.5% (-56.3% to -28%)   |
| 3  | Taiwan (Province of China) | Pulmonary aspiration and foreign body in airway | 0 (0 to 0)       | 0 (0 to 0)      | -18.4% (-31.5% to -3.3%)  |
| 4  | Taiwan (Province of China) | Self-harm by firearm                            | 1 (0 to 1)       | 1 (0 to 1)      | 37.1% (16% to 60.4%)      |
| 5  | Taiwan (Province of China) | Self-harm by other specified means              | 2 (1 to 3)       | 2 (2 to 4)      | 44.2% (34.5% to 54.2%)    |
| 6  | Taiwan (Province of China) | Unintentional firearm injuries                  | 1 (1 to 1)       | 1 (1 to 2)      | 7.4% (-5.2% to 19.1%)     |
| 7  | Taiwan (Province of China) | Venomous animal contact                         | 0 (0 to 1)       | 0 (0 to 1)      | -25% (-29.9% to -19.5%)   |
| 8  | Tajikistan                 | Adverse effects of medical treatment            | 0 (0 to 0)       | 0 (0 to 0)      | 0% (0% to 0%)             |
| 9  | Tajikistan                 | Conflict and terrorism                          | 0 (0 to 0)       | 0 (0 to 0)      | NA                        |
| 10 | Tajikistan                 | Cyclist road injuries                           | 22 (15 to 31)    | 17 (12 to 24)   | -20.7% (-27% to -13.9%)   |
| 11 | Tajikistan                 | Drowning                                        | 1 (0 to 1)       | 1 (0 to 1)      | -13.8% (-22.6% to -5.3%)  |
| 12 | Tajikistan                 | Environmental heat and cold exposure            | 5 (3 to 7)       | 5 (3 to 7)      | 1.7% (-3.5% to 7.7%)      |
| 13 | Tajikistan                 | Executions and police conflict                  | 0 (0 to 0)       | 0 (0 to 0)      | NA                        |
| 14 | Tajikistan                 | Exposure to forces of nature                    | 6 (4 to 11)      | 0 (0 to 0)      | NA                        |
| 15 | Tajikistan                 | Falls                                           | 145 (111 to 190) | 112 (84 to 149) | -22.5% (-26.7% to -18.1%) |
| 16 | Tajikistan                 | Fire, heat, and hot substances                  | 6 (3 to 9)       | 4 (2 to 6)      | -36.3% (-42.1% to -30.8%) |
| 17 | Tajikistan                 | Foreign body in eyes                            | 0 (0 to 0)       | 0 (0 to 0)      | 1.2% (0.6% to 2.1%)       |
| 18 | Tajikistan                 | Foreign body in other body part                 | 2 (1 to 4)       | 2 (1 to 4)      | 2.2% (-3.7% to 7.7%)      |
| 19 | Tajikistan                 | Motor vehicle road injuries                     | 56 (44 to 72)    | 41 (32 to 52)   | -27.5% (-32.3% to -22.3%) |
| 20 | Tajikistan                 | Motorcyclist road injuries                      | 6 (4 to 8)       | 3 (2 to 4)      | -45.5% (-51.7% to -39.2%) |
| 21 | Tajikistan                 | Non-venomous animal contact                     | 3 (2 to 5)       | 3 (2 to 6)      | 13% (7.1% to 19%)         |
| 22 | Tajikistan                 | Other exposure to mechanical forces             | 49 (30 to 79)    | 51 (31 to 81)   | 3.7% (-1.4% to 8.8%)      |
| 23 | Tajikistan                 | Other road injuries                             | 2 (1 to 3)       | 2 (1 to 3)      | -20.5% (-27.6% to -12.4%) |
| 24 | Tajikistan                 | Other transport injuries                        | 5 (4 to 7)       | 5 (3 to 7)      | -1.6% (-7.2% to 4.4%)     |
| 25 | Tajikistan                 | Other unintentional injuries                    | 22 (14 to 36)    | 21 (13 to 34)   | -7% (-13.4% to -2%)       |
| 26 | Tajikistan                 | Pedestrian road injuries                        | 16 (12 to 21)    | 13 (10 to 18)   | -18.2% (-24.6% to -11%)   |
| 27 | Tajikistan                 | Physical violence by firearm                    | 0 (0 to 0)       | 0 (0 to 0)      | -3.4% (-23.6% to 18.7%)   |
| 28 | Tajikistan                 | Physical violence by other means                | 26 (19 to 36)    | 12 (8 to 17)    | -55.5% (-60.8% to -50.1%) |
| 29 | Tajikistan                 | Physical violence by sharp object               | 3 (2 to 5)       | 2 (1 to 3)      | -49.5% (-57.8% to -39.6%) |
| 30 | Tajikistan                 | Poisoning by carbon monoxide                    | 0 (0 to 0)       | 0 (0 to 0)      | -13.2% (-33% to 6.9%)     |
| 31 | Tajikistan                 | Poisoning by other means                        | 0 (0 to 1)       | 0 (0 to 1)      | -16.3% (-29.1% to -3.9%)  |
| 32 | Tajikistan                 | Pulmonary aspiration and foreign body in airway | 1 (1 to 2)       | 1 (1 to 2)      | -1.4% (-9.8% to 7.4%)     |
| 33 | Tajikistan                 | Self-harm by firearm                            | 0 (0 to 0)       | 0 (0 to 0)      | 0.2% (-14.9% to 17.6%)    |
| 34 | Tajikistan                 | Self-harm by other specified means              | 1 (1 to 2)       | 1 (1 to 2)      | -6.1% (-10.6% to -1.4%)   |
| 35 | Tajikistan                 | Unintentional firearm injuries                  | 1 (0 to 1)       | 1 (0 to 1)      | -6% (-13.5% to 2.1%)      |
| 36 | Tajikistan                 | Venomous animal contact                         | 3 (1 to 5)       | 3 (1 to 6)      | 12.4% (6.5% to 19%)       |
| 37 | Thailand                   | Adverse effects of medical treatment            | 0 (0 to 0)       | 0 (0 to 0)      | 0% (0% to 0%)             |
| 38 | Thailand                   | Conflict and terrorism                          | 0 (0 to 1)       | 1 (0 to 1)      | NA                        |
| 39 | Thailand                   | Cyclist road injuries                           | 16 (11 to 24)    | 13 (8 to 19)    | -22.1% (-30.6% to -11.8%) |
| 40 | Thailand                   | Drowning                                        | 1 (0 to 1)       | 1 (0 to 1)      | 12.4% (1.7% to 24%)       |
| 41 | Thailand                   | Environmental heat and cold exposure            | 2 (1 to 2)       | 2 (1 to 3)      | 3.1% (-1.7% to 8.6%)      |
| 42 | Thailand                   | Executions and police conflict                  | 0 (0 to 0)       | 0 (0 to 0)      | NA                        |
| 43 | Thailand                   | Exposure to forces of nature                    | 0 (0 to 1)       | 0 (0 to 0)      | NA                        |
| 44 | Thailand                   | Falls                                           | 69 (55 to 88)    | 93 (73 to 117)  | 34.3% (28.5% to 40.2%)    |
| 45 |                            |                                                 |                  |                 |                           |
| 46 |                            |                                                 |                  |                 |                           |

|    |             |                                                 |                 |               |                           |
|----|-------------|-------------------------------------------------|-----------------|---------------|---------------------------|
| 1  |             |                                                 |                 |               |                           |
| 2  | Thailand    | Fire, heat, and hot substances                  | 1 (1 to 2)      | 1 (1 to 2)    | -7.9% (-14% to -2.4%)     |
| 3  | Thailand    | Foreign body in eyes                            | 0 (0 to 0)      | 0 (0 to 0)    | 0.2% (0.1% to 0.4%)       |
| 4  | Thailand    | Foreign body in other body part                 | 1 (1 to 2)      | 1 (1 to 2)    | -7.7% (-14.5% to -0.7%)   |
| 5  | Thailand    | Motor vehicle road injuries                     | 34 (25 to 45)   | 25 (19 to 34) | -25% (-32.6% to -16.6%)   |
| 6  | Thailand    | Motorcyclist road injuries                      | 80 (65 to 100)  | 62 (50 to 76) | -22.1% (-29.2% to -13.9%) |
| 7  | Thailand    | Non-venomous animal contact                     | 4 (2 to 7)      | 3 (2 to 5)    | -26.8% (-32.6% to -19.4%) |
| 8  | Thailand    | Other exposure to mechanical forces             | 24 (14 to 39)   | 17 (10 to 28) | -28.5% (-35.2% to -22.9%) |
| 9  | Thailand    | Other road injuries                             | 2 (1 to 3)      | 1 (1 to 2)    | -35.7% (-45.7% to -25.4%) |
| 10 | Thailand    | Other transport injuries                        | 7 (5 to 9)      | 6 (4 to 7)    | -17% (-23.3% to -11%)     |
| 11 | Thailand    | Other unintentional injuries                    | 14 (9 to 23)    | 11 (7 to 18)  | -20.9% (-27.8% to -13.2%) |
| 12 | Thailand    | Pedestrian road injuries                        | 24 (18 to 31)   | 11 (8 to 14)  | -55.3% (-59.6% to -50.4%) |
| 13 | Thailand    | Physical violence by firearm                    | 1 (1 to 2)      | 1 (0 to 1)    | -32.7% (-41.5% to -22.4%) |
| 14 | Thailand    | Physical violence by other means                | 32 (23 to 47)   | 18 (13 to 26) | -43.4% (-47.8% to -38.6%) |
| 15 | Thailand    | Physical violence by sharp object               | 5 (3 to 7)      | 2 (1 to 4)    | -53% (-58.6% to -46.6%)   |
| 16 | Thailand    | Poisoning by carbon monoxide                    | 0 (0 to 0)      | 0 (0 to 0)    | 25.6% (12.9% to 41.3%)    |
| 17 | Thailand    | Poisoning by other means                        | 0 (0 to 0)      | 0 (0 to 0)    | -9% (-16.3% to -1%)       |
| 18 | Thailand    | Pulmonary aspiration and foreign body in airway | 0 (0 to 1)      | 0 (0 to 0)    | -28.5% (-37.3% to -17.2%) |
| 19 | Thailand    | Self-harm by firearm                            | 0 (0 to 1)      | 0 (0 to 1)    | -32.2% (-48.8% to -13.4%) |
| 20 | Thailand    | Self-harm by other specified means              | 3 (2 to 4)      | 2 (1 to 3)    | -23.3% (-28.3% to -17.1%) |
| 21 | Thailand    | Unintentional firearm injuries                  | 3 (2 to 4)      | 2 (1 to 3)    | -24.2% (-33% to -15.4%)   |
| 22 | Thailand    | Venomous animal contact                         | 1 (0 to 3)      | 1 (0 to 2)    | -37.2% (-45.5% to -29.7%) |
| 23 | Timor-Leste | Adverse effects of medical treatment            | 0 (0 to 0)      | 0 (0 to 0)    | 0% (0% to 0%)             |
| 24 | Timor-Leste | Conflict and terrorism                          | 160 (64 to 367) | 0 (0 to 0)    | NA                        |
| 25 | Timor-Leste | Cyclist road injuries                           | 18 (12 to 25)   | 17 (12 to 24) | -3.9% (-12% to 4.8%)      |
| 26 | Timor-Leste | Drowning                                        | 0 (0 to 1)      | 0 (0 to 0)    | -28.6% (-33.6% to -23.7%) |
| 27 | Timor-Leste | Environmental heat and cold exposure            | 1 (1 to 2)      | 1 (1 to 2)    | -0.6% (-5.7% to 4.3%)     |
| 28 | Timor-Leste | Executions and police conflict                  | 0 (0 to 0)      | 0 (0 to 0)    | NA                        |
| 29 | Timor-Leste | Exposure to forces of nature                    | 0 (0 to 0)      | 0 (0 to 0)    | NA                        |
| 30 | Timor-Leste | Falls                                           | 42 (33 to 53)   | 63 (50 to 80) | 50.4% (44.9% to 55.8%)    |
| 31 | Timor-Leste | Fire, heat, and hot substances                  | 2 (1 to 3)      | 1 (1 to 2)    | -24.1% (-30.2% to -18%)   |
| 32 | Timor-Leste | Foreign body in eyes                            | 0 (0 to 0)      | 0 (0 to 0)    | -1% (-1.6% to -0.6%)      |
| 33 | Timor-Leste | Foreign body in other body part                 | 1 (1 to 2)      | 1 (0 to 2)    | -10.5% (-14.6% to -4.8%)  |
| 34 | Timor-Leste | Motor vehicle road injuries                     | 25 (18 to 32)   | 23 (16 to 30) | -7.7% (-15.7% to 0.9%)    |
| 35 | Timor-Leste | Motorcyclist road injuries                      | 21 (16 to 28)   | 34 (26 to 43) | 58.9% (44.2% to 75.7%)    |
| 36 | Timor-Leste | Non-venomous animal contact                     | 6 (4 to 10)     | 4 (2 to 7)    | -30.4% (-35.4% to -24.9%) |
| 37 | Timor-Leste | Other exposure to mechanical forces             | 21 (12 to 33)   | 17 (10 to 29) | -16.5% (-21.7% to -11.5%) |
| 38 | Timor-Leste | Other road injuries                             | 1 (1 to 2)      | 1 (1 to 2)    | 2% (-8.9% to 13.6%)       |
| 39 | Timor-Leste | Other transport injuries                        | 4 (3 to 6)      | 4 (3 to 6)    | 0% (-7.3% to 8.3%)        |
| 40 | Timor-Leste | Other unintentional injuries                    | 12 (8 to 19)    | 9 (6 to 15)   | -21.9% (-27.1% to -16.5%) |
| 41 | Timor-Leste | Pedestrian road injuries                        | 17 (13 to 22)   | 14 (11 to 19) | -16.9% (-23.1% to -9.4%)  |
| 42 | Timor-Leste | Physical violence by firearm                    | 0 (0 to 0)      | 0 (0 to 0)    | 24% (8.7% to 40.2%)       |
| 43 | Timor-Leste | Physical violence by other means                | 17 (12 to 24)   | 16 (11 to 23) | -3.4% (-9.5% to 3%)       |
| 44 | Timor-Leste | Physical violence by sharp object               | 4 (2 to 6)      | 3 (2 to 5)    | -5.9% (-15.5% to 4.2%)    |
| 45 |             |                                                 |                 |               |                           |
| 46 |             |                                                 |                 |               |                           |

|    |             |                                                 |               |               |                           |
|----|-------------|-------------------------------------------------|---------------|---------------|---------------------------|
| 1  |             |                                                 |               |               |                           |
| 2  | Timor-Leste | Poisoning by carbon monoxide                    | 0 (0 to 0)    | 0 (0 to 0)    | 29.1% (13.3% to 45.7%)    |
| 3  | Timor-Leste | Poisoning by other means                        | 0 (0 to 0)    | 0 (0 to 0)    | -13.7% (-19.9% to -6.2%)  |
| 4  | Timor-Leste | Pulmonary aspiration and foreign body in airway | 0 (0 to 0)    | 0 (0 to 0)    | -28.3% (-36.7% to -19.4%) |
| 5  | Timor-Leste | Self-harm by firearm                            | 0 (0 to 0)    | 0 (0 to 0)    | 27.9% (6% to 54.2%)       |
| 6  | Timor-Leste | Self-harm by other specified means              | 1 (1 to 2)    | 1 (1 to 2)    | -7.1% (-12.7% to -0.6%)   |
| 7  | Timor-Leste | Unintentional firearm injuries                  | 2 (1 to 4)    | 2 (1 to 3)    | -13.8% (-21.4% to -4.9%)  |
| 8  | Timor-Leste | Venomous animal contact                         | 2 (1 to 4)    | 1 (0 to 2)    | -37.7% (-45.2% to -30.7%) |
| 9  | Togo        | Adverse effects of medical treatment            | 0 (0 to 0)    | 0 (0 to 0)    | 0% (0% to 0%)             |
| 10 | Togo        | Conflict and terrorism                          | 0 (0 to 0)    | 0 (0 to 0)    | NA                        |
| 11 | Togo        | Cyclist road injuries                           | 30 (19 to 45) | 34 (22 to 50) | 13% (5% to 22.3%)         |
| 12 | Togo        | Drowning                                        | 0 (0 to 0)    | 0 (0 to 0)    | -10.7% (-16.6% to -4%)    |
| 13 | Togo        | Environmental heat and cold exposure            | 0 (0 to 1)    | 0 (0 to 1)    | 4.1% (-1.5% to 9.9%)      |
| 14 | Togo        | Executions and police conflict                  | 0 (0 to 0)    | 0 (0 to 0)    | NA                        |
| 15 | Togo        | Exposure to forces of nature                    | 0 (0 to 0)    | 0 (0 to 0)    | NA                        |
| 16 | Togo        | Falls                                           | 19 (13 to 29) | 21 (14 to 31) | 7.7% (3.7% to 12%)        |
| 17 | Togo        | Fire, heat, and hot substances                  | 0 (0 to 0)    | 0 (0 to 0)    | -6.4% (-12.5% to -1%)     |
| 18 | Togo        | Foreign body in eyes                            | 0 (0 to 0)    | 0 (0 to 0)    | -0.7% (-2% to 0%)         |
| 19 | Togo        | Foreign body in other body part                 | 4 (1 to 8)    | 4 (2 to 8)    | 1.9% (-3.7% to 7.6%)      |
| 20 | Togo        | Motor vehicle road injuries                     | 54 (36 to 76) | 55 (38 to 79) | 3.2% (-4.2% to 11.4%)     |
| 21 | Togo        | Motorcyclist road injuries                      | 27 (19 to 37) | 32 (23 to 44) | 19.7% (10.5% to 29%)      |
| 22 | Togo        | Non-venomous animal contact                     | 3 (1 to 6)    | 3 (1 to 6)    | 3.3% (-1.6% to 8.8%)      |
| 23 | Togo        | Other exposure to mechanical forces             | 25 (12 to 45) | 23 (11 to 42) | -7.8% (-13.9% to -0.6%)   |
| 24 | Togo        | Other road injuries                             | 2 (1 to 5)    | 2 (1 to 5)    | 3.4% (-5.6% to 13.3%)     |
| 25 | Togo        | Other transport injuries                        | 4 (3 to 5)    | 3 (2 to 5)    | -8.7% (-15.5% to -1.9%)   |
| 26 | Togo        | Other unintentional injuries                    | 3 (2 to 5)    | 3 (1 to 4)    | -6.3% (-12.6% to 1.5%)    |
| 27 | Togo        | Pedestrian road injuries                        | 57 (41 to 76) | 52 (37 to 71) | -8.2% (-14.2% to -2.1%)   |
| 28 | Togo        | Physical violence by firearm                    | 0 (0 to 0)    | 0 (0 to 0)    | 34.9% (22.3% to 48.6%)    |
| 29 | Togo        | Physical violence by other means                | 7 (5 to 11)   | 8 (5 to 12)   | 11.9% (5.8% to 18.6%)     |
| 30 | Togo        | Physical violence by sharp object               | 2 (1 to 3)    | 2 (1 to 4)    | 10.5% (2.2% to 19.9%)     |
| 31 | Togo        | Poisoning by carbon monoxide                    | 0 (0 to 0)    | 0 (0 to 0)    | 8.4% (-3.4% to 22.2%)     |
| 32 | Togo        | Poisoning by other means                        | 0 (0 to 0)    | 0 (0 to 0)    | -12.9% (-20.4% to -4.8%)  |
| 33 | Togo        | Pulmonary aspiration and foreign body in airway | 0 (0 to 0)    | 0 (0 to 0)    | -6.1% (-14.8% to 3.7%)    |
| 34 | Togo        | Self-harm by firearm                            | 0 (0 to 0)    | 0 (0 to 0)    | 24% (15.4% to 34.3%)      |
| 35 | Togo        | Self-harm by other specified means              | 0 (0 to 0)    | 0 (0 to 0)    | 13.5% (7% to 20.6%)       |
| 36 | Togo        | Unintentional firearm injuries                  | 1 (0 to 2)    | 1 (0 to 2)    | -10.5% (-18.7% to -1.6%)  |
| 37 | Togo        | Venomous animal contact                         | 0 (0 to 1)    | 0 (0 to 1)    | 1.8% (-5.7% to 9.1%)      |
| 38 | Tokelau     | Adverse effects of medical treatment            | 0 (0 to 0)    | 0 (0 to 0)    | 0% (0% to 0%)             |
| 39 | Tokelau     | Conflict and terrorism                          | 0 (0 to 0)    | 0 (0 to 0)    | NA                        |
| 40 | Tokelau     | Cyclist road injuries                           | 8 (4 to 12)   | 8 (5 to 13)   | 11.1% (3.3% to 19.5%)     |
| 41 | Tokelau     | Drowning                                        | 0 (0 to 0)    | 0 (0 to 0)    | 18.8% (7% to 34%)         |
| 42 | Tokelau     | Environmental heat and cold exposure            | 0 (0 to 0)    | 0 (0 to 0)    | -1.7% (-7.5% to 4.8%)     |
| 43 | Tokelau     | Executions and police conflict                  | 0 (0 to 0)    | 0 (0 to 0)    | NA                        |
| 44 | Tokelau     | Exposure to forces of nature                    | 0 (0 to 0)    | 0 (0 to 0)    | NA                        |
| 45 |             |                                                 |               |               |                           |
| 46 |             |                                                 |               |               |                           |



|    |         |                                                 |               |               |                           |
|----|---------|-------------------------------------------------|---------------|---------------|---------------------------|
| 1  |         |                                                 |               |               |                           |
| 2  | Tokelau | Falls                                           | 21 (13 to 34) | 34 (21 to 52) | 56.3% (50.4% to 62.9%)    |
| 3  | Tokelau | Fire, heat, and hot substances                  | 0 (0 to 0)    | 0 (0 to 0)    | 17.2% (9.7% to 24.6%)     |
| 4  | Tokelau | Foreign body in eyes                            | 0 (0 to 0)    | 0 (0 to 0)    | 2.4% (0.8% to 4.6%)       |
| 5  | Tokelau | Foreign body in other body part                 | 1 (0 to 2)    | 1 (0 to 2)    | -0.1% (-5% to 5.3%)       |
| 6  | Tokelau | Motor vehicle road injuries                     | 28 (20 to 40) | 26 (18 to 37) | -8.3% (-14.8% to -1.5%)   |
| 7  | Tokelau | Motorcyclist road injuries                      | 18 (13 to 26) | 20 (14 to 28) | 7.7% (0.1% to 15.4%)      |
| 8  | Tokelau | Non-venomous animal contact                     | 3 (1 to 6)    | 2 (1 to 5)    | -18.9% (-23.8% to -14.3%) |
| 9  | Tokelau | Other exposure to mechanical forces             | 20 (10 to 38) | 18 (9 to 34)  | -11.4% (-16.6% to -5.7%)  |
| 10 | Tokelau | Other road injuries                             | 2 (1 to 4)    | 2 (1 to 4)    | 12.6% (1.6% to 23.8%)     |
| 11 | Tokelau | Other transport injuries                        | 3 (2 to 5)    | 3 (2 to 4)    | -9.1% (-15.4% to -2.2%)   |
| 12 | Tokelau | Other unintentional injuries                    | 2 (1 to 4)    | 2 (1 to 4)    | -7.6% (-12.5% to -2.4%)   |
| 13 | Tokelau | Pedestrian road injuries                        | 18 (12 to 25) | 16 (11 to 23) | -9.1% (-15.6% to -2.3%)   |
| 14 | Tokelau | Physical violence by firearm                    | 0 (0 to 0)    | 0 (0 to 0)    | 61.5% (40.3% to 83.8%)    |
| 15 | Tokelau | Physical violence by other means                | 30 (20 to 45) | 30 (20 to 46) | 0.3% (-4.8% to 5.4%)      |
| 16 | Tokelau | Physical violence by sharp object               | 2 (1 to 5)    | 2 (1 to 4)    | -12% (-20.4% to -2.7%)    |
| 17 | Tokelau | Poisoning by carbon monoxide                    | 0 (0 to 0)    | 0 (0 to 0)    | 16.3% (4.3% to 30.4%)     |
| 18 | Tokelau | Poisoning by other means                        | 0 (0 to 0)    | 0 (0 to 0)    | -9.4% (-17.2% to -1%)     |
| 19 | Tokelau | Pulmonary aspiration and foreign body in airway | 0 (0 to 0)    | 0 (0 to 0)    | -12.9% (-22.3% to -3.4%)  |
| 20 | Tokelau | Self-harm by firearm                            | 0 (0 to 0)    | 0 (0 to 0)    | 4.5% (-3.2% to 14.8%)     |
| 21 | Tokelau | Self-harm by other specified means              | 0 (0 to 0)    | 0 (0 to 0)    | -10.1% (-15.9% to -2.9%)  |
| 22 | Tokelau | Unintentional firearm injuries                  | 1 (0 to 2)    | 1 (0 to 2)    | -16.9% (-25.9% to -8.3%)  |
| 23 | Tokelau | Venomous animal contact                         | 1 (0 to 2)    | 1 (0 to 2)    | -16.6% (-22.2% to -9.7%)  |
| 24 | Tonga   | Adverse effects of medical treatment            | 0 (0 to 0)    | 0 (0 to 0)    | 0% (0% to 0%)             |
| 25 | Tonga   | Conflict and terrorism                          | 0 (0 to 0)    | 0 (0 to 0)    | NA                        |
| 26 | Tonga   | Cyclist road injuries                           | 9 (6 to 13)   | 11 (7 to 15)  | 12.1% (4.1% to 20.4%)     |
| 27 | Tonga   | Drowning                                        | 0 (0 to 1)    | 0 (0 to 1)    | 22.1% (11.4% to 35.2%)    |
| 28 | Tonga   | Environmental heat and cold exposure            | 2 (1 to 3)    | 2 (1 to 3)    | -1.2% (-6.1% to 5.2%)     |
| 29 | Tonga   | Executions and police conflict                  | 0 (0 to 0)    | 0 (0 to 0)    | NA                        |
| 30 | Tonga   | Exposure to forces of nature                    | 6 (3 to 10)   | 0 (0 to 0)    | NA                        |
| 31 | Tonga   | Falls                                           | 44 (34 to 58) | 61 (47 to 82) | 39.3% (34.4% to 45%)      |
| 32 | Tonga   | Fire, heat, and hot substances                  | 2 (1 to 3)    | 2 (1 to 3)    | -3.3% (-9.3% to 2.7%)     |
| 33 | Tonga   | Foreign body in eyes                            | 0 (0 to 0)    | 0 (0 to 0)    | -0.3% (-0.9% to 0.1%)     |
| 34 | Tonga   | Foreign body in other body part                 | 1 (0 to 1)    | 1 (0 to 1)    | -3.1% (-7.5% to 2.1%)     |
| 35 | Tonga   | Motor vehicle road injuries                     | 21 (16 to 27) | 22 (17 to 28) | 2.7% (-4.8% to 10.8%)     |
| 36 | Tonga   | Motorcyclist road injuries                      | 12 (9 to 16)  | 14 (11 to 18) | 15.2% (6.4% to 24.6%)     |
| 37 | Tonga   | Non-venomous animal contact                     | 5 (3 to 9)    | 4 (2 to 7)    | -14.1% (-18.4% to -9%)    |
| 38 | Tonga   | Other exposure to mechanical forces             | 11 (6 to 18)  | 10 (5 to 17)  | -6.4% (-11.1% to -0.6%)   |
| 39 | Tonga   | Other road injuries                             | 1 (1 to 2)    | 1 (1 to 2)    | 11.9% (1.4% to 22.9%)     |
| 40 | Tonga   | Other transport injuries                        | 7 (5 to 9)    | 6 (4 to 8)    | -11.5% (-16.7% to -5.9%)  |
| 41 | Tonga   | Other unintentional injuries                    | 10 (6 to 15)  | 8 (6 to 13)   | -13.3% (-17.5% to -8.9%)  |
| 42 | Tonga   | Pedestrian road injuries                        | 12 (9 to 15)  | 11 (8 to 14)  | -9.7% (-16.6% to -2.2%)   |
| 43 | Tonga   | Physical violence by firearm                    | 0 (0 to 0)    | 0 (0 to 0)    | -17.3% (-34.4% to 1.3%)   |
| 44 | Tonga   | Physical violence by other means                | 38 (27 to 53) | 19 (13 to 27) | -50.7% (-55% to -46.1%)   |
| 45 |         |                                                 |               |               |                           |
| 46 |         |                                                 |               |               |                           |

|    |                     |                                                 |               |               |                           |
|----|---------------------|-------------------------------------------------|---------------|---------------|---------------------------|
| 1  |                     |                                                 |               |               |                           |
| 2  | Tonga               | Physical violence by sharp object               | 3 (2 to 6)    | 2 (1 to 3)    | -52.5% (-60.5% to -43.8%) |
| 3  | Tonga               | Poisoning by carbon monoxide                    | 0 (0 to 0)    | 0 (0 to 0)    | 10.4% (1.2% to 22.6%)     |
| 4  | Tonga               | Poisoning by other means                        | 0 (0 to 0)    | 0 (0 to 0)    | -15% (-21.1% to -9.3%)    |
| 5  | Tonga               | Pulmonary aspiration and foreign body in airway | 0 (0 to 0)    | 0 (0 to 0)    | -1.4% (-10.7% to 9.3%)    |
| 6  | Tonga               | Self-harm by firearm                            | 0 (0 to 0)    | 0 (0 to 1)    | 29.3% (13.6% to 46.3%)    |
| 7  | Tonga               | Self-harm by other specified means              | 1 (1 to 1)    | 1 (1 to 2)    | 18.5% (10.6% to 27.2%)    |
| 8  | Tonga               | Unintentional firearm injuries                  | 2 (1 to 3)    | 2 (1 to 3)    | -3.3% (-10.5% to 3.8%)    |
| 9  | Tonga               | Venomous animal contact                         | 3 (1 to 6)    | 3 (1 to 6)    | -11.8% (-16.6% to -6%)    |
| 10 | Trinidad and Tobago | Adverse effects of medical treatment            | 0 (0 to 0)    | 0 (0 to 0)    | 0% (0% to 0%)             |
| 11 | Trinidad and Tobago | Conflict and terrorism                          | 16 (7 to 36)  | 0 (0 to 0)    | NA                        |
| 12 | Trinidad and Tobago | Cyclist road injuries                           | 29 (21 to 39) | 27 (19 to 37) | -8% (-18.9% to 4.6%)      |
| 13 | Trinidad and Tobago | Drowning                                        | 0 (0 to 1)    | 0 (0 to 1)    | 0% (-12.2% to 13.2%)      |
| 14 | Trinidad and Tobago | Environmental heat and cold exposure            | 12 (8 to 17)  | 12 (9 to 18)  | 6.3% (1.6% to 11.2%)      |
| 15 | Trinidad and Tobago | Executions and police conflict                  | 0 (0 to 0)    | 0 (0 to 0)    | NA                        |
| 16 | Trinidad and Tobago | Exposure to forces of nature                    | 0 (0 to 0)    | 0 (0 to 0)    | NA                        |
| 17 | Trinidad and Tobago | Falls                                           | 56 (44 to 72) | 60 (47 to 79) | 7.2% (1.5% to 12.9%)      |
| 18 | Trinidad and Tobago | Fire, heat, and hot substances                  | 4 (2 to 6)    | 3 (2 to 6)    | -5.9% (-13% to 0.8%)      |
| 19 | Trinidad and Tobago | Foreign body in eyes                            | 0 (0 to 0)    | 0 (0 to 0)    | 0.4% (0.2% to 0.7%)       |
| 20 | Trinidad and Tobago | Foreign body in other body part                 | 1 (1 to 2)    | 1 (1 to 2)    | 1% (-4.9% to 7%)          |
| 21 | Trinidad and Tobago | Motor vehicle road injuries                     | 30 (22 to 39) | 35 (26 to 45) | 16.7% (2.9% to 32.9%)     |
| 22 | Trinidad and Tobago | Motorcyclist road injuries                      | 11 (8 to 15)  | 16 (12 to 22) | 46.2% (27% to 70.4%)      |
| 23 | Trinidad and Tobago | Non-venomous animal contact                     | 3 (1 to 5)    | 2 (1 to 4)    | -17.8% (-22.3% to -12.2%) |
| 24 | Trinidad and Tobago | Other exposure to mechanical forces             | 29 (17 to 48) | 33 (18 to 54) | 12.4% (5.1% to 19.6%)     |
| 25 | Trinidad and Tobago | Other road injuries                             | 4 (2 to 7)    | 4 (2 to 7)    | -4.6% (-17.2% to 9.4%)    |
| 26 | Trinidad and Tobago | Other transport injuries                        | 4 (3 to 5)    | 4 (3 to 5)    | -1.3% (-7.5% to 4.9%)     |
| 27 | Trinidad and Tobago | Other unintentional injuries                    | 12 (8 to 20)  | 12 (7 to 20)  | -3.1% (-9.6% to 3.1%)     |
| 28 | Trinidad and Tobago | Pedestrian road injuries                        | 21 (16 to 27) | 13 (10 to 18) | -35.6% (-43.8% to -26.6%) |
| 29 | Trinidad and Tobago | Physical violence by firearm                    | 1 (1 to 1)    | 5 (3 to 6)    | 398.6% (304.4% to 524.9%) |
| 30 | Trinidad and Tobago | Physical violence by other means                | 11 (8 to 17)  | 19 (13 to 29) | 68.1% (49.2% to 88.7%)    |
| 31 | Trinidad and Tobago | Physical violence by sharp object               | 4 (3 to 6)    | 7 (4 to 11)   | 77.4% (52% to 107.8%)     |
| 32 | Trinidad and Tobago | Poisoning by carbon monoxide                    | 0 (0 to 0)    | 0 (0 to 0)    | 12.4% (-1.6% to 27.3%)    |
| 33 | Trinidad and Tobago | Poisoning by other means                        | 0 (0 to 0)    | 0 (0 to 0)    | 2% (-6.2% to 11.4%)       |
| 34 | Trinidad and Tobago | Pulmonary aspiration and foreign body in airway | 1 (0 to 1)    | 0 (0 to 1)    | -19% (-27.2% to -9.3%)    |
| 35 | Trinidad and Tobago | Self-harm by firearm                            | 0 (0 to 1)    | 0 (0 to 1)    | -4.8% (-18.5% to 12.6%)   |
| 36 | Trinidad and Tobago | Self-harm by other specified means              | 1 (1 to 2)    | 1 (1 to 1)    | -30.6% (-37.3% to -23.2%) |
| 37 | Trinidad and Tobago | Unintentional firearm injuries                  | 4 (2 to 6)    | 4 (2 to 7)    | 18.3% (8.7% to 29.5%)     |
| 38 | Trinidad and Tobago | Venomous animal contact                         | 5 (2 to 8)    | 4 (2 to 7)    | -15.7% (-20% to -10.4%)   |
| 39 | Tunisia             | Adverse effects of medical treatment            | 0 (0 to 0)    | 0 (0 to 0)    | 0% (0% to 0%)             |
| 40 | Tunisia             | Conflict and terrorism                          | 0 (0 to 0)    | 1 (0 to 2)    | NA                        |
| 41 | Tunisia             | Cyclist road injuries                           | 21 (14 to 30) | 20 (14 to 28) | -3.7% (-11.8% to 5.5%)    |
| 42 | Tunisia             | Drowning                                        | 0 (0 to 0)    | 0 (0 to 0)    | 60.5% (35.7% to 86.9%)    |
| 43 | Tunisia             | Environmental heat and cold exposure            | 3 (2 to 4)    | 3 (2 to 4)    | 3% (-1.5% to 8.3%)        |
| 44 | Tunisia             | Executions and police conflict                  | 0 (0 to 0)    | 0 (0 to 0)    | NA                        |
| 45 |                     |                                                 |               |               |                           |
| 46 |                     |                                                 |               |               |                           |

|    |         |                                                 |               |                 |                           |
|----|---------|-------------------------------------------------|---------------|-----------------|---------------------------|
| 1  |         |                                                 |               |                 |                           |
| 2  | Tunisia | Exposure to forces of nature                    | 2 (1 to 3)    | 0 (0 to 0)      | NA                        |
| 3  | Tunisia | Falls                                           | 66 (51 to 86) | 92 (71 to 121)  | 40.1% (34.5% to 46%)      |
| 4  | Tunisia | Fire, heat, and hot substances                  | 1 (0 to 1)    | 1 (0 to 1)      | -15.4% (-23.5% to -7.4%)  |
| 5  | Tunisia | Foreign body in eyes                            | 0 (0 to 0)    | 0 (0 to 0)      | -0.7% (-1.4% to -0.3%)    |
| 6  | Tunisia | Foreign body in other body part                 | 1 (1 to 3)    | 1 (1 to 3)      | -1.1% (-5.3% to 3.8%)     |
| 7  | Tunisia | Motor vehicle road injuries                     | 41 (31 to 52) | 39 (31 to 51)   | -2.9% (-10.9% to 5.7%)    |
| 8  | Tunisia | Motorcyclist road injuries                      | 15 (11 to 19) | 14 (11 to 18)   | -6.1% (-14.8% to 2.7%)    |
| 9  | Tunisia | Non-venomous animal contact                     | 3 (2 to 6)    | 3 (2 to 6)      | -7.6% (-12.4% to -2%)     |
| 10 | Tunisia | Other exposure to mechanical forces             | 44 (28 to 69) | 36 (23 to 56)   | -17.6% (-22.7% to -12.1%) |
| 11 | Tunisia | Other road injuries                             | 2 (1 to 4)    | 2 (1 to 4)      | 4.5% (-6% to 16%)         |
| 12 | Tunisia | Other transport injuries                        | 5 (3 to 6)    | 5 (3 to 6)      | -0.5% (-7.3% to 5.6%)     |
| 13 | Tunisia | Other unintentional injuries                    | 16 (10 to 26) | 15 (10 to 25)   | -4.5% (-10% to 2.1%)      |
| 14 | Tunisia | Pedestrian road injuries                        | 30 (23 to 37) | 24 (18 to 30)   | -19.6% (-26.8% to -12.8%) |
| 15 | Tunisia | Physical violence by firearm                    | 0 (0 to 0)    | 1 (0 to 1)      | 141.5% (115.7% to 172.5%) |
| 16 | Tunisia | Physical violence by other means                | 9 (6 to 13)   | 10 (7 to 14)    | 2.8% (-3.4% to 8.9%)      |
| 17 | Tunisia | Physical violence by sharp object               | 1 (1 to 2)    | 1 (1 to 2)      | 1.8% (-6.8% to 10.5%)     |
| 18 | Tunisia | Poisoning by carbon monoxide                    | 0 (0 to 0)    | 0 (0 to 0)      | 30.1% (14.9% to 45.7%)    |
| 19 | Tunisia | Poisoning by other means                        | 0 (0 to 0)    | 0 (0 to 0)      | -15.3% (-23.7% to -6.7%)  |
| 20 | Tunisia | Pulmonary aspiration and foreign body in airway | 0 (0 to 1)    | 0 (0 to 1)      | -13.4% (-21.3% to -4.8%)  |
| 21 | Tunisia | Self-harm by firearm                            | 0 (0 to 0)    | 0 (0 to 0)      | 34.3% (21% to 47.5%)      |
| 22 | Tunisia | Self-harm by other specified means              | 1 (1 to 1)    | 1 (1 to 2)      | 14.7% (8.6% to 21.3%)     |
| 23 | Tunisia | Unintentional firearm injuries                  | 2 (1 to 2)    | 2 (1 to 2)      | -3.9% (-15.3% to 7.7%)    |
| 24 | Tunisia | Venomous animal contact                         | 2 (1 to 4)    | 2 (1 to 4)      | -5.8% (-11.5% to 0.2%)    |
| 25 | Turkey  | Adverse effects of medical treatment            | 0 (0 to 0)    | 0 (0 to 0)      | 0% (0% to 0%)             |
| 26 | Turkey  | Conflict and terrorism                          | 8 (3 to 19)   | 2 (1 to 5)      | NA                        |
| 27 | Turkey  | Cyclist road injuries                           | 16 (11 to 22) | 14 (10 to 20)   | -9.5% (-17.7% to -1%)     |
| 28 | Turkey  | Drowning                                        | 0 (0 to 0)    | 0 (0 to 1)      | 135.5% (104% to 171.8%)   |
| 29 | Turkey  | Environmental heat and cold exposure            | 3 (2 to 4)    | 3 (2 to 4)      | 3.6% (-2.5% to 10.1%)     |
| 30 | Turkey  | Executions and police conflict                  | 0 (0 to 0)    | 0 (0 to 0)      | NA                        |
| 31 | Turkey  | Exposure to forces of nature                    | 0 (0 to 1)    | 0 (0 to 0)      | NA                        |
| 32 | Turkey  | Falls                                           | 60 (46 to 79) | 120 (95 to 155) | 100.3% (88.8% to 114.5%)  |
| 33 | Turkey  | Fire, heat, and hot substances                  | 1 (0 to 1)    | 1 (0 to 1)      | -1.1% (-6.2% to 4.2%)     |
| 34 | Turkey  | Foreign body in eyes                            | 0 (0 to 0)    | 0 (0 to 0)      | 0.1% (0% to 0.2%)         |
| 35 | Turkey  | Foreign body in other body part                 | 1 (1 to 3)    | 1 (1 to 3)      | -8.2% (-14.7% to -2.8%)   |
| 36 | Turkey  | Motor vehicle road injuries                     | 31 (24 to 40) | 26 (20 to 33)   | -17% (-24.2% to -8.6%)    |
| 37 | Turkey  | Motorcyclist road injuries                      | 10 (7 to 13)  | 11 (8 to 14)    | 9.2% (-1.2% to 20.8%)     |
| 38 | Turkey  | Non-venomous animal contact                     | 4 (2 to 7)    | 3 (2 to 5)      | -17.4% (-22.5% to -12.3%) |
| 39 | Turkey  | Other exposure to mechanical forces             | 27 (16 to 44) | 26 (15 to 42)   | -5.5% (-11.3% to 0.4%)    |
| 40 | Turkey  | Other road injuries                             | 5 (3 to 7)    | 2 (1 to 3)      | -62.7% (-69.5% to -55.9%) |
| 41 | Turkey  | Other transport injuries                        | 6 (4 to 8)    | 5 (4 to 7)      | -12.9% (-18.1% to -7.7%)  |
| 42 | Turkey  | Other unintentional injuries                    | 22 (14 to 35) | 17 (10 to 28)   | -22.2% (-29.3% to -15.3%) |
| 43 | Turkey  | Pedestrian road injuries                        | 15 (11 to 19) | 13 (10 to 16)   | -10.5% (-18.2% to -1.8%)  |
| 44 | Turkey  | Physical violence by firearm                    | 0 (0 to 1)    | 1 (0 to 1)      | 78.4% (50.6% to 107.1%)   |
| 45 |         |                                                 |               |                 |                           |
| 46 |         |                                                 |               |                 |                           |

|    |              |                                                 |                 |                 |                           |
|----|--------------|-------------------------------------------------|-----------------|-----------------|---------------------------|
| 1  |              |                                                 |                 |                 |                           |
| 2  | Turkey       | Physical violence by other means                | 18 (13 to 25)   | 13 (9 to 18)    | -28.9% (-35.4% to -22.7%) |
| 3  | Turkey       | Physical violence by sharp object               | 3 (2 to 4)      | 2 (1 to 3)      | -22.3% (-31.7% to -12.8%) |
| 4  | Turkey       | Poisoning by carbon monoxide                    | 0 (0 to 0)      | 0 (0 to 0)      | 39.1% (23% to 59%)        |
| 5  | Turkey       | Poisoning by other means                        | 0 (0 to 0)      | 0 (0 to 0)      | -17% (-24.1% to -10%)     |
| 6  | Turkey       | Pulmonary aspiration and foreign body in airway | 0 (0 to 1)      | 0 (0 to 1)      | -19.1% (-25.5% to -12.6%) |
| 7  | Turkey       | Self-harm by firearm                            | 0 (0 to 1)      | 0 (0 to 0)      | -20.5% (-28.4% to -11.7%) |
| 8  | Turkey       | Self-harm by other specified means              | 1 (1 to 1)      | 1 (0 to 1)      | -5.4% (-12.1% to 2.2%)    |
| 9  | Turkey       | Unintentional firearm injuries                  | 3 (2 to 4)      | 2 (1 to 4)      | -14.6% (-23.3% to -4.4%)  |
| 10 | Turkmenistan | Venomous animal contact                         | 2 (1 to 4)      | 2 (1 to 4)      | -8.7% (-14.9% to 0.1%)    |
| 11 | Turkmenistan | Adverse effects of medical treatment            | 0 (0 to 0)      | 0 (0 to 0)      | 0% (0% to 0%)             |
| 12 | Turkmenistan | Conflict and terrorism                          | 0 (0 to 0)      | 0 (0 to 0)      | NA                        |
| 13 | Turkmenistan | Cyclist road injuries                           | 20 (14 to 28)   | 17 (11 to 23)   | -17.5% (-26.2% to -7.5%)  |
| 14 | Turkmenistan | Drowning                                        | 1 (0 to 1)      | 1 (0 to 1)      | 2.6% (-9.1% to 14.8%)     |
| 15 | Turkmenistan | Environmental heat and cold exposure            | 5 (3 to 7)      | 7 (5 to 9)      | 37.8% (17.9% to 57.7%)    |
| 16 | Turkmenistan | Executions and police conflict                  | 0 (0 to 0)      | 0 (0 to 0)      | NA                        |
| 17 | Turkmenistan | Exposure to forces of nature                    | 0 (0 to 0)      | 0 (0 to 0)      | NA                        |
| 18 | Turkmenistan | Falls                                           | 102 (78 to 135) | 108 (81 to 147) | 6.1% (0.3% to 11.6%)      |
| 19 | Turkmenistan | Fire, heat, and hot substances                  | 6 (4 to 11)     | 4 (2 to 7)      | -37.2% (-44.2% to -31%)   |
| 20 | Turkmenistan | Foreign body in eyes                            | 0 (0 to 0)      | 0 (0 to 0)      | 2.6% (1.6% to 3.9%)       |
| 21 | Turkmenistan | Foreign body in other body part                 | 2 (1 to 4)      | 2 (1 to 4)      | -8% (-14.8% to -1.2%)     |
| 22 | Turkmenistan | Motor vehicle road injuries                     | 53 (42 to 68)   | 37 (28 to 47)   | -30.8% (-39.2% to -21.8%) |
| 23 | Turkmenistan | Motorcyclist road injuries                      | 6 (5 to 8)      | 5 (4 to 8)      | -13.5% (-27% to 1.3%)     |
| 24 | Turkmenistan | Non-venomous animal contact                     | 2 (1 to 4)      | 2 (1 to 4)      | -11.4% (-16.7% to -5.5%)  |
| 25 | Turkmenistan | Other exposure to mechanical forces             | 49 (30 to 78)   | 65 (40 to 103)  | 31.4% (22.4% to 42.8%)    |
| 26 | Turkmenistan | Other road injuries                             | 2 (1 to 3)      | 2 (1 to 3)      | -17.9% (-28.7% to -4.8%)  |
| 27 | Turkmenistan | Other transport injuries                        | 4 (3 to 6)      | 5 (3 to 6)      | 5.1% (-1.4% to 11.7%)     |
| 28 | Turkmenistan | Other unintentional injuries                    | 21 (13 to 33)   | 22 (14 to 35)   | 3.7% (-2.2% to 10.1%)     |
| 29 | Turkmenistan | Pedestrian road injuries                        | 30 (23 to 37)   | 15 (11 to 19)   | -50.3% (-56.7% to -43.1%) |
| 30 | Turkmenistan | Physical violence by firearm                    | 0 (0 to 0)      | 0 (0 to 0)      | 17.1% (-4.8% to 38.8%)    |
| 31 | Turkmenistan | Physical violence by other means                | 19 (13 to 26)   | 16 (11 to 23)   | -12.4% (-22.9% to -1.3%)  |
| 32 | Turkmenistan | Physical violence by sharp object               | 3 (2 to 5)      | 3 (2 to 4)      | -15.3% (-27.3% to -2%)    |
| 33 | Turkmenistan | Poisoning by carbon monoxide                    | 0 (0 to 0)      | 0 (0 to 0)      | 38.7% (24.8% to 58.5%)    |
| 34 | Turkmenistan | Poisoning by other means                        | 0 (0 to 1)      | 0 (0 to 1)      | 0.1% (-8.7% to 10%)       |
| 35 | Turkmenistan | Pulmonary aspiration and foreign body in airway | 1 (1 to 2)      | 1 (1 to 2)      | -13.2% (-20.2% to -5.5%)  |
| 36 | Turkmenistan | Self-harm by firearm                            | 0 (0 to 0)      | 0 (0 to 0)      | 16.7% (0.9% to 37.3%)     |
| 37 | Turkmenistan | Self-harm by other specified means              | 2 (1 to 3)      | 2 (2 to 4)      | 29.2% (21.3% to 37.7%)    |
| 38 | Turkmenistan | Unintentional firearm injuries                  | 1 (1 to 2)      | 1 (1 to 2)      | 19.8% (7.3% to 34%)       |
| 39 | Turkmenistan | Venomous animal contact                         | 2 (1 to 5)      | 2 (1 to 4)      | -11.8% (-16.5% to -6.2%)  |
| 40 | Tuvalu       | Adverse effects of medical treatment            | 0 (0 to 0)      | 0 (0 to 0)      | 0% (0% to 0%)             |
| 41 | Tuvalu       | Conflict and terrorism                          | 0 (0 to 0)      | 0 (0 to 0)      | NA                        |
| 42 | Tuvalu       | Cyclist road injuries                           | 8 (5 to 12)     | 8 (5 to 13)     | 5.3% (-3.6% to 14.9%)     |
| 43 | Tuvalu       | Drowning                                        | 0 (0 to 0)      | 0 (0 to 0)      | 11.4% (4.1% to 20.3%)     |
| 44 | Tuvalu       | Environmental heat and cold exposure            | 0 (0 to 1)      | 0 (0 to 1)      | -0.9% (-7.7% to 7.1%)     |
| 45 |              |                                                 |                 |                 |                           |
| 46 |              |                                                 |                 |                 |                           |

|    |        |                                                 |               |               |                           |
|----|--------|-------------------------------------------------|---------------|---------------|---------------------------|
| 1  |        |                                                 |               |               |                           |
| 2  | Tuvalu | Executions and police conflict                  | 0 (0 to 0)    | 0 (0 to 0)    | NA                        |
| 3  | Tuvalu | Exposure to forces of nature                    | 0 (0 to 0)    | 0 (0 to 0)    | NA                        |
| 4  | Tuvalu | Falls                                           | 21 (13 to 34) | 32 (20 to 51) | 50.2% (44.6% to 56.5%)    |
| 5  | Tuvalu | Fire, heat, and hot substances                  | 0 (0 to 0)    | 0 (0 to 0)    | 9.4% (1.8% to 18.5%)      |
| 6  | Tuvalu | Foreign body in eyes                            | 0 (0 to 0)    | 0 (0 to 0)    | 4.4% (1.9% to 8.1%)       |
| 7  | Tuvalu | Foreign body in other body part                 | 1 (0 to 2)    | 1 (0 to 1)    | -0.3% (-4.7% to 5.2%)     |
| 8  | Tuvalu | Motor vehicle road injuries                     | 30 (20 to 41) | 27 (18 to 38) | -9.2% (-16.4% to -0.9%)   |
| 9  | Tuvalu | Motorcyclist road injuries                      | 20 (15 to 27) | 22 (16 to 30) | 8.3% (-0.7% to 18%)       |
| 10 | Tuvalu | Non-venomous animal contact                     | 3 (1 to 6)    | 2 (1 to 5)    | -15% (-19.4% to -10.6%)   |
| 11 | Tuvalu | Other exposure to mechanical forces             | 18 (9 to 33)  | 16 (8 to 30)  | -9.6% (-15% to -2.9%)     |
| 12 | Tuvalu | Other road injuries                             | 2 (1 to 3)    | 2 (1 to 4)    | 12.3% (1.4% to 25.2%)     |
| 13 | Tuvalu | Other transport injuries                        | 3 (2 to 5)    | 3 (2 to 4)    | -9.4% (-15.1% to -3.4%)   |
| 14 | Tuvalu | Other unintentional injuries                    | 2 (1 to 3)    | 2 (1 to 3)    | -5.1% (-10.8% to 1.2%)    |
| 15 | Tuvalu | Pedestrian road injuries                        | 20 (14 to 28) | 18 (13 to 25) | -8.8% (-16% to -0.9%)     |
| 16 | Tuvalu | Physical violence by firearm                    | 0 (0 to 0)    | 0 (0 to 0)    | 23.2% (7.6% to 41.9%)     |
| 17 | Tuvalu | Physical violence by other means                | 29 (19 to 44) | 32 (21 to 48) | 11.3% (3.5% to 19.6%)     |
| 18 | Tuvalu | Physical violence by sharp object               | 2 (1 to 4)    | 2 (1 to 4)    | -5.8% (-15.3% to 3.8%)    |
| 19 | Tuvalu | Poisoning by carbon monoxide                    | 0 (0 to 0)    | 0 (0 to 0)    | 14.3% (1% to 29.5%)       |
| 20 | Tuvalu | Poisoning by other means                        | 0 (0 to 0)    | 0 (0 to 0)    | -11.2% (-19.6% to -2.2%)  |
| 21 | Tuvalu | Pulmonary aspiration and foreign body in airway | 0 (0 to 0)    | 0 (0 to 0)    | -19.7% (-29.8% to -8.4%)  |
| 22 | Tuvalu | Self-harm by firearm                            | 0 (0 to 0)    | 0 (0 to 0)    | 12.5% (2.6% to 23.5%)     |
| 23 | Tuvalu | Self-harm by other specified means              | 0 (0 to 1)    | 0 (0 to 0)    | -17.1% (-23.3% to -9.8%)  |
| 24 | Tuvalu | Unintentional firearm injuries                  | 1 (0 to 3)    | 1 (0 to 2)    | -20.9% (-30.5% to -11.2%) |
| 25 | Tuvalu | Venomous animal contact                         | 1 (0 to 2)    | 1 (0 to 2)    | -6.5% (-13.3% to 3.9%)    |
| 26 | Uganda | Adverse effects of medical treatment            | 0 (0 to 0)    | 0 (0 to 0)    | 0% (0% to 0%)             |
| 27 | Uganda | Conflict and terrorism                          | 23 (7 to 58)  | 1 (0 to 2)    | NA                        |
| 28 | Uganda | Cyclist road injuries                           | 41 (28 to 57) | 44 (30 to 62) | 7.3% (-0.3% to 15.7%)     |
| 29 | Uganda | Drowning                                        | 0 (0 to 0)    | 0 (0 to 0)    | -1% (-8.3% to 8.8%)       |
| 30 | Uganda | Environmental heat and cold exposure            | 0 (0 to 1)    | 0 (0 to 1)    | 2.3% (-3.3% to 7.6%)      |
| 31 | Uganda | Executions and police conflict                  | 0 (0 to 0)    | 0 (0 to 0)    | NA                        |
| 32 | Uganda | Exposure to forces of nature                    | 0 (0 to 0)    | 0 (0 to 0)    | NA                        |
| 33 | Uganda | Falls                                           | 23 (14 to 36) | 27 (17 to 42) | 17.2% (13.6% to 21%)      |
| 34 | Uganda | Fire, heat, and hot substances                  | 0 (0 to 1)    | 0 (0 to 1)    | -5.6% (-10% to -1.3%)     |
| 35 | Uganda | Foreign body in eyes                            | 0 (0 to 0)    | 0 (0 to 0)    | -1.1% (-2.5% to -0.2%)    |
| 36 | Uganda | Foreign body in other body part                 | 3 (1 to 7)    | 3 (1 to 7)    | -6.9% (-11.8% to -1.7%)   |
| 37 | Uganda | Motor vehicle road injuries                     | 36 (24 to 50) | 39 (26 to 53) | 7.6% (-1.3% to 17.2%)     |
| 38 | Uganda | Motorcyclist road injuries                      | 19 (13 to 26) | 20 (14 to 28) | 9.7% (1.5% to 18%)        |
| 39 | Uganda | Non-venomous animal contact                     | 5 (2 to 11)   | 5 (2 to 9)    | -14.8% (-18.9% to -10.6%) |
| 40 | Uganda | Other exposure to mechanical forces             | 25 (12 to 46) | 24 (12 to 44) | -4.5% (-10.2% to 2.2%)    |
| 41 | Uganda | Other road injuries                             | 2 (1 to 3)    | 1 (1 to 3)    | -14% (-21.1% to -5.9%)    |
| 42 | Uganda | Other transport injuries                        | 3 (2 to 5)    | 3 (2 to 4)    | -5.1% (-10% to -0.3%)     |
| 43 | Uganda | Other unintentional injuries                    | 2 (1 to 4)    | 2 (1 to 4)    | -1.1% (-8.5% to 5.7%)     |
| 44 | Uganda | Pedestrian road injuries                        | 53 (39 to 70) | 50 (37 to 66) | -5.3% (-11.8% to 0.9%)    |
| 45 |        |                                                 |               |               |                           |
| 46 |        |                                                 |               |               |                           |

|    |                      |                                                 |                  |                  |                           |
|----|----------------------|-------------------------------------------------|------------------|------------------|---------------------------|
| 1  |                      |                                                 |                  |                  |                           |
| 2  | Uganda               | Physical violence by firearm                    | 0 (0 to 0)       | 0 (0 to 0)       | 35.3% (18.9% to 53.6%)    |
| 3  | Uganda               | Physical violence by other means                | 6 (4 to 9)       | 6 (4 to 10)      | 7.4% (1.3% to 14.2%)      |
| 4  | Uganda               | Physical violence by sharp object               | 2 (1 to 3)       | 2 (1 to 3)       | 6.1% (-1.9% to 15%)       |
| 5  | Uganda               | Poisoning by carbon monoxide                    | 0 (0 to 0)       | 0 (0 to 0)       | 13.9% (2% to 26.1%)       |
| 6  | Uganda               | Poisoning by other means                        | 0 (0 to 0)       | 0 (0 to 0)       | -9.6% (-16.7% to -1.8%)   |
| 7  | Uganda               | Pulmonary aspiration and foreign body in airway | 0 (0 to 0)       | 0 (0 to 0)       | -16.5% (-26.1% to -4.6%)  |
| 8  | Uganda               | Self-harm by firearm                            | 0 (0 to 0)       | 0 (0 to 0)       | 10.5% (3.5% to 19.6%)     |
| 9  | Uganda               | Self-harm by other specified means              | 0 (0 to 0)       | 0 (0 to 0)       | 6.6% (0.9% to 13%)        |
| 10 | Uganda               | Unintentional firearm injuries                  | 1 (0 to 2)       | 1 (0 to 2)       | -16.2% (-24% to -8%)      |
| 11 | Uganda               | Venomous animal contact                         | 1 (0 to 2)       | 1 (0 to 2)       | -14.4% (-22.9% to -7%)    |
| 12 | Ukraine              | Adverse effects of medical treatment            | 0 (0 to 0)       | 0 (0 to 0)       | 0% (0% to 0%)             |
| 13 | Ukraine              | Conflict and terrorism                          | 0 (0 to 0)       | 3 (1 to 6)       | NA                        |
| 14 | Ukraine              | Cyclist road injuries                           | 54 (36 to 76)    | 48 (32 to 68)    | -11.4% (-16.6% to -5.1%)  |
| 15 | Ukraine              | Drowning                                        | 1 (1 to 2)       | 1 (0 to 1)       | -49.5% (-54.1% to -43.9%) |
| 16 | Ukraine              | Environmental heat and cold exposure            | 13 (9 to 18)     | 11 (8 to 16)     | -11% (-19.6% to -2.4%)    |
| 17 | Ukraine              | Executions and police conflict                  | 0 (0 to 0)       | 0 (0 to 0)       | NA                        |
| 18 | Ukraine              | Exposure to forces of nature                    | 0 (0 to 0)       | 0 (0 to 0)       | NA                        |
| 19 | Ukraine              | Falls                                           | 353 (268 to 470) | 279 (212 to 373) | -20.9% (-23.9% to -17.6%) |
| 20 | Ukraine              | Fire, heat, and hot substances                  | 5 (3 to 8)       | 4 (2 to 6)       | -21.1% (-24.8% to -17%)   |
| 21 | Ukraine              | Foreign body in eyes                            | 0 (0 to 0)       | 0 (0 to 0)       | 0.8% (0.4% to 1.3%)       |
| 22 | Ukraine              | Foreign body in other body part                 | 3 (1 to 5)       | 2 (1 to 5)       | -3.1% (-8.8% to 2%)       |
| 23 | Ukraine              | Motor vehicle road injuries                     | 149 (107 to 196) | 134 (96 to 178)  | -9.8% (-14.8% to -4.1%)   |
| 24 | Ukraine              | Motorcyclist road injuries                      | 20 (14 to 28)    | 16 (11 to 23)    | -20% (-26.1% to -13.5%)   |
| 25 | Ukraine              | Non-venomous animal contact                     | 5 (3 to 8)       | 5 (3 to 9)       | 4.9% (0.4% to 9.3%)       |
| 26 | Ukraine              | Other exposure to mechanical forces             | 81 (50 to 129)   | 78 (48 to 125)   | -3.5% (-8.1% to 1.3%)     |
| 27 | Ukraine              | Other road injuries                             | 3 (1 to 5)       | 2 (1 to 4)       | -5.6% (-12.8% to 2%)      |
| 28 | Ukraine              | Other transport injuries                        | 6 (4 to 8)       | 6 (5 to 9)       | 14.1% (5.7% to 25.4%)     |
| 29 | Ukraine              | Other unintentional injuries                    | 26 (16 to 44)    | 26 (16 to 42)    | -2.1% (-6.9% to 2.7%)     |
| 30 | Ukraine              | Pedestrian road injuries                        | 77 (56 to 101)   | 52 (37 to 69)    | -33.2% (-37.5% to -28.3%) |
| 31 | Ukraine              | Physical violence by firearm                    | 0 (0 to 0)       | 0 (0 to 0)       | 8.3% (-3.2% to 20.2%)     |
| 32 | Ukraine              | Physical violence by other means                | 39 (27 to 56)    | 35 (24 to 50)    | -9.8% (-14% to -5.4%)     |
| 33 | Ukraine              | Physical violence by sharp object               | 4 (3 to 7)       | 3 (2 to 6)       | -24% (-30.4% to -17.2%)   |
| 34 | Ukraine              | Poisoning by carbon monoxide                    | 0 (0 to 0)       | 0 (0 to 0)       | -39.2% (-46.2% to -31.8%) |
| 35 | Ukraine              | Poisoning by other means                        | 0 (0 to 1)       | 0 (0 to 0)       | -6.9% (-13.3% to -0.4%)   |
| 36 | Ukraine              | Pulmonary aspiration and foreign body in airway | 1 (1 to 2)       | 1 (1 to 2)       | -7% (-14.4% to 0.8%)      |
| 37 | Ukraine              | Self-harm by firearm                            | 1 (1 to 2)       | 1 (1 to 2)       | 0.3% (-13.8% to 15%)      |
| 38 | Ukraine              | Self-harm by other specified means              | 5 (3 to 8)       | 8 (5 to 12)      | 48.8% (36.6% to 62%)      |
| 39 | Ukraine              | Unintentional firearm injuries                  | 1 (1 to 2)       | 1 (1 to 2)       | -6.2% (-13.2% to 1.3%)    |
| 40 | Ukraine              | Venomous animal contact                         | 4 (2 to 7)       | 4 (2 to 8)       | 6% (0.6% to 11%)          |
| 41 | United Arab Emirates | Adverse effects of medical treatment            | 0 (0 to 0)       | 0 (0 to 0)       | 0% (0% to 0%)             |
| 42 | United Arab Emirates | Conflict and terrorism                          | 0 (0 to 0)       | 0 (0 to 0)       | NA                        |
| 43 | United Arab Emirates | Cyclist road injuries                           | 22 (15 to 31)    | 20 (14 to 28)    | -9.9% (-18.5% to -0.8%)   |
| 44 | United Arab Emirates | Drowning                                        | 0 (0 to 0)       | 0 (0 to 0)       | 36.2% (13.5% to 64.3%)    |
| 45 |                      |                                                 |                  |                  |                           |
| 46 |                      |                                                 |                  |                  |                           |

|    |                      |                                                 |                  |                  |                           |
|----|----------------------|-------------------------------------------------|------------------|------------------|---------------------------|
| 1  |                      |                                                 |                  |                  |                           |
| 2  | United Arab Emirates | Environmental heat and cold exposure            | 4 (3 to 6)       | 4 (3 to 6)       | 1.7% (-3.3% to 7.2%)      |
| 3  | United Arab Emirates | Executions and police conflict                  | 0 (0 to 0)       | 0 (0 to 0)       | NA                        |
| 4  | United Arab Emirates | Exposure to forces of nature                    | 0 (0 to 0)       | 0 (0 to 0)       | NA                        |
| 5  | United Arab Emirates | Falls                                           | 101 (77 to 131)  | 114 (88 to 150)  | 13.5% (9.1% to 18.3%)     |
| 6  | United Arab Emirates | Fire, heat, and hot substances                  | 1 (0 to 1)       | 1 (0 to 1)       | -16.3% (-22.8% to -9.3%)  |
| 7  | United Arab Emirates | Foreign body in eyes                            | 0 (0 to 0)       | 0 (0 to 0)       | 1.7% (0.5% to 3.5%)       |
| 8  | United Arab Emirates | Foreign body in other body part                 | 1 (1 to 3)       | 1 (1 to 3)       | -1% (-7.2% to 4.9%)       |
| 9  | United Arab Emirates | Motor vehicle road injuries                     | 74 (58 to 93)    | 62 (48 to 78)    | -16.3% (-22.6% to -9.9%)  |
| 10 | United Arab Emirates | Motorcyclist road injuries                      | 17 (13 to 23)    | 15 (12 to 20)    | -10.5% (-19.4% to -0.8%)  |
| 11 | United Arab Emirates | Non-venomous animal contact                     | 2 (1 to 4)       | 2 (1 to 4)       | 9.3% (2.7% to 15.5%)      |
| 12 | United Arab Emirates | Other exposure to mechanical forces             | 34 (21 to 54)    | 29 (18 to 46)    | -14.4% (-19.9% to -9%)    |
| 13 | United Arab Emirates | Other road injuries                             | 2 (1 to 4)       | 2 (1 to 4)       | 5% (-6.3% to 19.4%)       |
| 14 | United Arab Emirates | Other transport injuries                        | 5 (4 to 7)       | 6 (4 to 8)       | 5.1% (-1.1% to 11.1%)     |
| 15 | United Arab Emirates | Other unintentional injuries                    | 20 (13 to 33)    | 18 (12 to 29)    | -10.9% (-17.5% to -4.7%)  |
| 16 | United Arab Emirates | Pedestrian road injuries                        | 52 (40 to 65)    | 35 (27 to 45)    | -32.2% (-37.9% to -26.3%) |
| 17 | United Arab Emirates | Physical violence by firearm                    | 0 (0 to 0)       | 1 (0 to 1)       | 110.7% (87.1% to 137.4%)  |
| 18 | United Arab Emirates | Physical violence by other means                | 13 (9 to 19)     | 12 (8 to 16)     | -10.9% (-16.7% to -4.8%)  |
| 19 | United Arab Emirates | Physical violence by sharp object               | 2 (1 to 3)       | 2 (1 to 3)       | -6.6% (-15.9% to 2.8%)    |
| 20 | United Arab Emirates | Poisoning by carbon monoxide                    | 0 (0 to 0)       | 0 (0 to 0)       | 31.2% (19.3% to 46.9%)    |
| 21 | United Arab Emirates | Poisoning by other means                        | 0 (0 to 0)       | 0 (0 to 0)       | -11.1% (-17.7% to -4.1%)  |
| 22 | United Arab Emirates | Pulmonary aspiration and foreign body in airway | 0 (0 to 1)       | 0 (0 to 1)       | -1.9% (-10.7% to 8.1%)    |
| 23 | United Arab Emirates | Self-harm by firearm                            | 0 (0 to 0)       | 0 (0 to 1)       | 3.4% (-7.8% to 16.1%)     |
| 24 | United Arab Emirates | Self-harm by other specified means              | 1 (1 to 2)       | 1 (1 to 2)       | 3.8% (-2.8% to 10.8%)     |
| 25 | United Arab Emirates | Unintentional firearm injuries                  | 2 (1 to 3)       | 2 (1 to 3)       | -5% (-13.8% to 4.9%)      |
| 26 | United Arab Emirates | Venomous animal contact                         | 1 (0 to 2)       | 1 (0 to 3)       | 7.9% (-0.4% to 14.9%)     |
| 27 | United Kingdom       | Adverse effects of medical treatment            | 0 (0 to 0)       | 0 (0 to 0)       | 0% (0% to 0%)             |
| 28 | United Kingdom       | Conflict and terrorism                          | 1 (0 to 3)       | 0 (0 to 0)       | NA                        |
| 29 | United Kingdom       | Cyclist road injuries                           | 21 (15 to 30)    | 16 (11 to 22)    | -26.8% (-30.2% to -23.4%) |
| 30 | United Kingdom       | Drowning                                        | 0 (0 to 0)       | 0 (0 to 0)       | -0.9% (-4.2% to 2.2%)     |
| 31 | United Kingdom       | Environmental heat and cold exposure            | 4 (2 to 6)       | 3 (2 to 5)       | -25.9% (-31.3% to -21.8%) |
| 32 | United Kingdom       | Executions and police conflict                  | 0 (0 to 0)       | 0 (0 to 0)       | NA                        |
| 33 | United Kingdom       | Exposure to forces of nature                    | 0 (0 to 0)       | 0 (0 to 0)       | NA                        |
| 34 | United Kingdom       | Falls                                           | 181 (139 to 239) | 218 (168 to 286) | 20.9% (18.2% to 23.8%)    |
| 35 | United Kingdom       | Fire, heat, and hot substances                  | 2 (1 to 4)       | 2 (1 to 3)       | -23.6% (-28.5% to -20%)   |
| 36 | United Kingdom       | Foreign body in eyes                            | 0 (0 to 0)       | 0 (0 to 0)       | 1.8% (1.3% to 2.6%)       |
| 37 | United Kingdom       | Foreign body in other body part                 | 2 (1 to 4)       | 2 (1 to 4)       | -0.1% (-1.1% to 0.8%)     |
| 38 | United Kingdom       | Motor vehicle road injuries                     | 26 (18 to 34)    | 15 (11 to 21)    | -39.6% (-42.5% to -36.8%) |
| 39 | United Kingdom       | Motorcyclist road injuries                      | 11 (8 to 15)     | 7 (5 to 9)       | -36.7% (-40% to -33.4%)   |
| 40 | United Kingdom       | Non-venomous animal contact                     | 3 (1 to 5)       | 2 (1 to 4)       | -7.8% (-8.5% to -6.9%)    |
| 41 | United Kingdom       | Other exposure to mechanical forces             | 49 (28 to 80)    | 46 (27 to 75)    | -6.4% (-10.8% to -2.9%)   |
| 42 | United Kingdom       | Other road injuries                             | 1 (1 to 2)       | 1 (1 to 2)       | -18.8% (-23.1% to -14.5%) |
| 43 | United Kingdom       | Other transport injuries                        | 4 (3 to 6)       | 4 (3 to 6)       | -6.4% (-8.9% to -4.1%)    |
| 44 | United Kingdom       | Other unintentional injuries                    | 31 (19 to 51)    | 23 (14 to 37)    | -26.9% (-31.4% to -22.3%) |
| 45 |                      |                                                 |                  |                  |                           |
| 46 |                      |                                                 |                  |                  |                           |

|    |                             |                                                 |               |               |                           |
|----|-----------------------------|-------------------------------------------------|---------------|---------------|---------------------------|
| 1  |                             |                                                 |               |               |                           |
| 2  | United Kingdom              | Pedestrian road injuries                        | 10 (7 to 13)  | 5 (3 to 7)    | -50% (-54.1% to -46.3%)   |
| 3  | United Kingdom              | Physical violence by firearm                    | 0 (0 to 1)    | 1 (0 to 1)    | 45.9% (36.3% to 56.7%)    |
| 4  | United Kingdom              | Physical violence by other means                | 15 (10 to 22) | 13 (8 to 19)  | -16.1% (-20.6% to -12.1%) |
| 5  | United Kingdom              | Physical violence by sharp object               | 1 (1 to 2)    | 1 (1 to 2)    | -2.6% (-9.3% to 3.7%)     |
| 6  | United Kingdom              | Poisoning by carbon monoxide                    | 0 (0 to 0)    | 0 (0 to 0)    | 3.5% (-2.4% to 9.6%)      |
| 7  | United Kingdom              | Poisoning by other means                        | 0 (0 to 1)    | 0 (0 to 0)    | -26.5% (-30.7% to -23%)   |
| 8  | United Kingdom              | Pulmonary aspiration and foreign body in airway | 1 (0 to 1)    | 1 (0 to 1)    | -15.5% (-18.6% to -12.5%) |
| 9  | United Kingdom              | Self-harm by firearm                            | 0 (0 to 0)    | 0 (0 to 0)    | 2.4% (-3.1% to 8.2%)      |
| 10 | United Kingdom              | Self-harm by other specified means              | 3 (2 to 4)    | 2 (1 to 3)    | -24.1% (-27.2% to -21%)   |
| 11 | United Kingdom              | Unintentional firearm injuries                  | 1 (1 to 2)    | 1 (1 to 2)    | 2.3% (-1.7% to 5.8%)      |
| 12 | United Republic of Tanzania | Venomous animal contact                         | 1 (0 to 3)    | 1 (0 to 2)    | -9.7% (-10.7% to -8.8%)   |
| 13 | United Republic of Tanzania | Adverse effects of medical treatment            | 0 (0 to 0)    | 0 (0 to 0)    | 0% (0% to 0%)             |
| 14 | United Republic of Tanzania | Conflict and terrorism                          | 0 (0 to 0)    | 0 (0 to 0)    | NA                        |
| 15 | United Republic of Tanzania | Cyclist road injuries                           | 36 (24 to 53) | 35 (23 to 50) | -3.8% (-10.2% to 4%)      |
| 16 | United Republic of Tanzania | Drowning                                        | 0 (0 to 0)    | 0 (0 to 0)    | -1% (-8.8% to 6.9%)       |
| 17 | United Republic of Tanzania | Environmental heat and cold exposure            | 0 (0 to 1)    | 0 (0 to 1)    | 0.5% (-5.2% to 6.1%)      |
| 18 | United Republic of Tanzania | Executions and police conflict                  | 0 (0 to 0)    | 0 (0 to 0)    | NA                        |
| 19 | United Republic of Tanzania | Exposure to forces of nature                    | 3 (2 to 6)    | 0 (0 to 0)    | NA                        |
| 20 | United Republic of Tanzania | Falls                                           | 25 (15 to 38) | 29 (18 to 44) | 16.1% (12.1% to 20.2%)    |
| 21 | United Republic of Tanzania | Fire, heat, and hot substances                  | 0 (0 to 1)    | 0 (0 to 1)    | -5.5% (-10% to -1.1%)     |
| 22 | United Republic of Tanzania | Foreign body in eyes                            | 0 (0 to 0)    | 0 (0 to 0)    | -0.1% (-0.3% to 0%)       |
| 23 | United Republic of Tanzania | Foreign body in other body part                 | 3 (1 to 8)    | 3 (1 to 7)    | -3.2% (-8% to 1%)         |
| 24 | United Republic of Tanzania | Motor vehicle road injuries                     | 35 (24 to 50) | 34 (23 to 48) | -2.1% (-10.5% to 6.2%)    |
| 25 | United Republic of Tanzania | Motorcyclist road injuries                      | 19 (13 to 27) | 17 (11 to 24) | -11.9% (-18.6% to -5%)    |
| 26 | United Republic of Tanzania | Non-venomous animal contact                     | 5 (2 to 11)   | 5 (2 to 9)    | -14.6% (-18.8% to -10.1%) |
| 27 | United Republic of Tanzania | Other exposure to mechanical forces             | 26 (13 to 48) | 26 (13 to 48) | -1.3% (-6.8% to 4.1%)     |
| 28 | United Republic of Tanzania | Other road injuries                             | 2 (1 to 4)    | 2 (1 to 4)    | -3% (-11.4% to 5.6%)      |
| 29 | United Republic of Tanzania | Other transport injuries                        | 3 (2 to 4)    | 3 (2 to 4)    | 0.1% (-4.7% to 5.4%)      |
| 30 | United Republic of Tanzania | Other unintentional injuries                    | 2 (1 to 4)    | 2 (1 to 4)    | -6.7% (-13% to -0.9%)     |
| 31 | United Republic of Tanzania | Pedestrian road injuries                        | 53 (39 to 70) | 49 (36 to 65) | -7.1% (-13% to -0.7%)     |
| 32 | United Republic of Tanzania | Physical violence by firearm                    | 0 (0 to 0)    | 0 (0 to 0)    | 32.8% (17.7% to 49%)      |
| 33 | United Republic of Tanzania | Physical violence by other means                | 7 (5 to 11)   | 7 (5 to 11)   | 2.3% (-3.9% to 8%)        |
| 34 | United Republic of Tanzania | Physical violence by sharp object               | 2 (1 to 4)    | 2 (1 to 4)    | 0.2% (-7.9% to 7.7%)      |
| 35 | United Republic of Tanzania | Poisoning by carbon monoxide                    | 0 (0 to 0)    | 0 (0 to 0)    | 11.4% (0.7% to 23.6%)     |
| 36 | United Republic of Tanzania | Poisoning by other means                        | 0 (0 to 0)    | 0 (0 to 0)    | -11% (-18.4% to -3.8%)    |
| 37 | United Republic of Tanzania | Pulmonary aspiration and foreign body in airway | 0 (0 to 0)    | 0 (0 to 0)    | -16.7% (-26.3% to -6.9%)  |
| 38 | United Republic of Tanzania | Self-harm by firearm                            | 0 (0 to 0)    | 0 (0 to 0)    | 2.6% (-4.3% to 10.9%)     |
| 39 | United Republic of Tanzania | Self-harm by other specified means              | 0 (0 to 0)    | 0 (0 to 0)    | -10.2% (-15.3% to -5.2%)  |
| 40 | United Republic of Tanzania | Unintentional firearm injuries                  | 1 (0 to 2)    | 1 (0 to 2)    | -9.2% (-16.6% to -1.2%)   |
| 41 | United States of America    | Venomous animal contact                         | 1 (0 to 2)    | 1 (0 to 2)    | -11.1% (-17.6% to -3.9%)  |
| 42 | United States of America    | Adverse effects of medical treatment            | 0 (0 to 0)    | 0 (0 to 0)    | 0% (0% to 0%)             |
| 43 | United States of America    | Conflict and terrorism                          | 0 (0 to 0)    | 0 (0 to 0)    | NA                        |
| 44 | United States of America    | Cyclist road injuries                           | 11 (6 to 17)  | 9 (6 to 14)   | -14.3% (-24.4% to -3.2%)  |
| 45 |                             |                                                 |               |               |                           |
| 46 |                             |                                                 |               |               |                           |



|    |                              |                                                 |                 |                |                           |
|----|------------------------------|-------------------------------------------------|-----------------|----------------|---------------------------|
| 1  |                              |                                                 |                 |                |                           |
| 2  | United States of America     | Drowning                                        | 0 (0 to 0)      | 0 (0 to 0)     | -2.6% (-5.8% to 0.3%)     |
| 3  | United States of America     | Environmental heat and cold exposure            | 1 (0 to 1)      | 0 (0 to 1)     | -2.7% (-6% to 0.5%)       |
| 4  | United States of America     | Executions and police conflict                  | 0 (0 to 0)      | 0 (0 to 0)     | NA                        |
| 5  | United States of America     | Exposure to forces of nature                    | 0 (0 to 0)      | 0 (0 to 0)     | NA                        |
| 6  | United States of America     | Falls                                           | 89 (56 to 133)  | 90 (59 to 132) | 1.6% (-3.6% to 7.9%)      |
| 7  | United States of America     | Fire, heat, and hot substances                  | 1 (0 to 1)      | 0 (0 to 1)     | -30.1% (-33.7% to -26.8%) |
| 8  | United States of America     | Foreign body in eyes                            | 0 (0 to 0)      | 0 (0 to 0)     | -4.9% (-8.3% to -2%)      |
| 9  | United States of America     | Foreign body in other body part                 | 2 (1 to 5)      | 3 (1 to 6)     | 14.1% (9.5% to 20.3%)     |
| 10 | United States of America     | Motor vehicle road injuries                     | 81 (57 to 110)  | 65 (46 to 88)  | -19.5% (-23.5% to -15.8%) |
| 11 | United States of America     | Motorcyclist road injuries                      | 15 (10 to 22)   | 17 (11 to 24)  | 12.7% (3.3% to 23.5%)     |
| 12 | United States of America     | Non-venomous animal contact                     | 4 (2 to 7)      | 4 (2 to 8)     | 10.7% (7.7% to 14.3%)     |
| 13 | United States of America     | Other exposure to mechanical forces             | 102 (51 to 188) | 68 (34 to 128) | -33% (-36% to -30.5%)     |
| 14 | United States of America     | Other road injuries                             | 2 (1 to 4)      | 2 (1 to 3)     | -7% (-12.3% to -2%)       |
| 15 | United States of America     | Other transport injuries                        | 13 (9 to 18)    | 9 (6 to 13)    | -31.2% (-33% to -29.1%)   |
| 16 | United States of America     | Other unintentional injuries                    | 10 (6 to 17)    | 11 (6 to 19)   | 11.8% (6.2% to 16.8%)     |
| 17 | United States of America     | Pedestrian road injuries                        | 12 (8 to 18)    | 10 (7 to 15)   | -17.5% (-23.5% to -11.6%) |
| 18 | United States of America     | Physical violence by firearm                    | 4 (2 to 6)      | 4 (2 to 6)     | 1.2% (-6.6% to 9.7%)      |
| 19 | United States of America     | Physical violence by other means                | 34 (21 to 54)   | 28 (17 to 44)  | -18.2% (-21% to -15%)     |
| 20 | United States of America     | Physical violence by sharp object               | 6 (3 to 11)     | 4 (2 to 8)     | -31.2% (-35.4% to -27.3%) |
| 21 | United States of America     | Poisoning by carbon monoxide                    | 0 (0 to 0)      | 0 (0 to 0)     | -2.3% (-6.9% to 1.9%)     |
| 22 | United States of America     | Poisoning by other means                        | 0 (0 to 0)      | 0 (0 to 0)     | -19.9% (-23% to -16.9%)   |
| 23 | United States of America     | Pulmonary aspiration and foreign body in airway | 0 (0 to 0)      | 0 (0 to 0)     | 8.8% (4.7% to 13.6%)      |
| 24 | United States of America     | Self-harm by firearm                            | 0 (0 to 0)      | 0 (0 to 0)     | -3.9% (-10.3% to 2.4%)    |
| 25 | United States of America     | Self-harm by other specified means              | 1 (0 to 1)      | 1 (0 to 1)     | 14.1% (11.1% to 17.8%)    |
| 26 | United States of America     | Unintentional firearm injuries                  | 2 (1 to 4)      | 1 (0 to 2)     | -48.7% (-54.7% to -43.6%) |
| 27 | United States of America     | Venomous animal contact                         | 1 (0 to 2)      | 1 (0 to 2)     | -1.1% (-7% to 2.6%)       |
| 28 | United States Virgin Islands | Adverse effects of medical treatment            | 0 (0 to 0)      | 0 (0 to 0)     | 0% (0% to 0%)             |
| 29 | United States Virgin Islands | Conflict and terrorism                          | 0 (0 to 0)      | 0 (0 to 0)     | NA                        |
| 30 | United States Virgin Islands | Cyclist road injuries                           | 22 (14 to 34)   | 16 (10 to 23)  | -30.5% (-38.3% to -22.2%) |
| 31 | United States Virgin Islands | Drowning                                        | 0 (0 to 0)      | 0 (0 to 0)     | 23.1% (13.3% to 34.3%)    |
| 32 | United States Virgin Islands | Environmental heat and cold exposure            | 2 (1 to 3)      | 2 (1 to 3)     | -3.5% (-8.4% to 1.1%)     |
| 33 | United States Virgin Islands | Executions and police conflict                  | 0 (0 to 0)      | 0 (0 to 0)     | NA                        |
| 34 | United States Virgin Islands | Exposure to forces of nature                    | 0 (0 to 0)      | 0 (0 to 0)     | NA                        |
| 35 | United States Virgin Islands | Falls                                           | 26 (17 to 39)   | 36 (23 to 53)  | 38.3% (32.4% to 43.7%)    |
| 36 | United States Virgin Islands | Fire, heat, and hot substances                  | 1 (0 to 1)      | 1 (0 to 1)     | 1% (-4.9% to 6.6%)        |
| 37 | United States Virgin Islands | Foreign body in eyes                            | 0 (0 to 0)      | 0 (0 to 0)     | -0.1% (-0.4% to 0%)       |
| 38 | United States Virgin Islands | Foreign body in other body part                 | 1 (1 to 3)      | 1 (1 to 3)     | -1.3% (-7.4% to 5.2%)     |
| 39 | United States Virgin Islands | Motor vehicle road injuries                     | 40 (27 to 56)   | 27 (18 to 39)  | -32.2% (-39.1% to -24.9%) |
| 40 | United States Virgin Islands | Motorcyclist road injuries                      | 25 (18 to 35)   | 26 (19 to 35)  | 5.4% (-5.2% to 18.4%)     |
| 41 | United States Virgin Islands | Non-venomous animal contact                     | 2 (1 to 4)      | 2 (1 to 3)     | -17.9% (-21.7% to -13.2%) |
| 42 | United States Virgin Islands | Other exposure to mechanical forces             | 60 (30 to 107)  | 69 (35 to 125) | 16.1% (10% to 23.4%)      |
| 43 | United States Virgin Islands | Other road injuries                             | 6 (3 to 11)     | 4 (2 to 8)     | -21% (-29.5% to -10.6%)   |
| 44 | United States Virgin Islands | Other transport injuries                        | 4 (3 to 5)      | 3 (2 to 5)     | -6.7% (-13.4% to 0.6%)    |

|    |                              |                                                 |                  |                  |                           |
|----|------------------------------|-------------------------------------------------|------------------|------------------|---------------------------|
| 1  |                              |                                                 |                  |                  |                           |
| 2  | United States Virgin Islands | Other unintentional injuries                    | 5 (3 to 9)       | 4 (2 to 8)       | -4.4% (-9.7% to 1.1%)     |
| 3  | United States Virgin Islands | Pedestrian road injuries                        | 30 (22 to 41)    | 18 (13 to 25)    | -39.4% (-45.3% to -33%)   |
| 4  | United States Virgin Islands | Physical violence by firearm                    | 5 (3 to 7)       | 6 (4 to 10)      | 38% (14.2% to 66.3%)      |
| 5  | United States Virgin Islands | Physical violence by other means                | 21 (13 to 33)    | 18 (11 to 29)    | -14% (-22.1% to -5.2%)    |
| 6  | United States Virgin Islands | Physical violence by sharp object               | 8 (4 to 14)      | 6 (3 to 11)      | -24.5% (-35.3% to -14.4%) |
| 7  | United States Virgin Islands | Poisoning by carbon monoxide                    | 0 (0 to 0)       | 0 (0 to 0)       | 7.4% (-2.2% to 18.8%)     |
| 8  | United States Virgin Islands | Poisoning by other means                        | 0 (0 to 0)       | 0 (0 to 0)       | -5.5% (-13.5% to 2.2%)    |
| 9  | United States Virgin Islands | Pulmonary aspiration and foreign body in airway | 0 (0 to 0)       | 0 (0 to 0)       | -14.4% (-24.6% to -3.2%)  |
| 10 | United States Virgin Islands | Self-harm by firearm                            | 0 (0 to 0)       | 0 (0 to 0)       | -6.3% (-13% to 1.4%)      |
| 11 | United States Virgin Islands | Self-harm by other specified means              | 0 (0 to 0)       | 0 (0 to 0)       | -29.5% (-36.6% to -21.1%) |
| 12 | United States Virgin Islands | Unintentional firearm injuries                  | 2 (1 to 5)       | 3 (1 to 6)       | 15.7% (6.8% to 25%)       |
| 13 | Uruguay                      | Venomous animal contact                         | 1 (0 to 3)       | 1 (0 to 3)       | -18.5% (-22.5% to -14%)   |
| 14 | Uruguay                      | Adverse effects of medical treatment            | 0 (0 to 0)       | 0 (0 to 0)       | 0% (0% to 0%)             |
| 15 | Uruguay                      | Conflict and terrorism                          | 0 (0 to 0)       | 0 (0 to 0)       | NA                        |
| 16 | Uruguay                      | Cyclist road injuries                           | 23 (16 to 31)    | 24 (17 to 33)    | 6.5% (-4.1% to 20.6%)     |
| 17 | Uruguay                      | Drowning                                        | 0 (0 to 0)       | 0 (0 to 0)       | 4% (-8% to 18%)           |
| 18 | Uruguay                      | Environmental heat and cold exposure            | 2 (1 to 2)       | 2 (1 to 3)       | 8.5% (4% to 13.7%)        |
| 19 | Uruguay                      | Executions and police conflict                  | 0 (0 to 0)       | 0 (0 to 0)       | NA                        |
| 20 | Uruguay                      | Exposure to forces of nature                    | 0 (0 to 0)       | 0 (0 to 0)       | NA                        |
| 21 | Uruguay                      | Falls                                           | 134 (103 to 173) | 150 (114 to 196) | 11.6% (7.7% to 15.4%)     |
| 22 | Uruguay                      | Fire, heat, and hot substances                  | 3 (2 to 5)       | 4 (2 to 6)       | 8.4% (3.1% to 13.8%)      |
| 23 | Uruguay                      | Foreign body in eyes                            | 0 (0 to 0)       | 0 (0 to 0)       | -0.1% (-0.2% to 0%)       |
| 24 | Uruguay                      | Foreign body in other body part                 | 2 (1 to 5)       | 2 (1 to 5)       | 0.1% (-4.6% to 5.8%)      |
| 25 | Uruguay                      | Motor vehicle road injuries                     | 39 (30 to 50)    | 40 (31 to 52)    | 2.4% (-7.6% to 13.4%)     |
| 26 | Uruguay                      | Motorcyclist road injuries                      | 11 (8 to 14)     | 19 (14 to 25)    | 79.7% (58.1% to 107.6%)   |
| 27 | Uruguay                      | Non-venomous animal contact                     | 5 (3 to 9)       | 4 (2 to 8)       | -11.5% (-15.5% to -7%)    |
| 28 | Uruguay                      | Other exposure to mechanical forces             | 154 (94 to 245)  | 112 (69 to 178)  | -27% (-34.6% to -17.5%)   |
| 29 | Uruguay                      | Other road injuries                             | 1 (1 to 2)       | 1 (1 to 2)       | -0.9% (-11.7% to 12.1%)   |
| 30 | Uruguay                      | Other transport injuries                        | 4 (3 to 5)       | 4 (3 to 5)       | 0.2% (-4.7% to 4.4%)      |
| 31 | Uruguay                      | Other unintentional injuries                    | 38 (25 to 59)    | 29 (19 to 46)    | -23.4% (-29.9% to -16.4%) |
| 32 | Uruguay                      | Pedestrian road injuries                        | 16 (12 to 20)    | 13 (10 to 16)    | -19.9% (-28.1% to -10%)   |
| 33 | Uruguay                      | Physical violence by firearm                    | 1 (1 to 1)       | 3 (2 to 4)       | 216.4% (166.7% to 277.3%) |
| 34 | Uruguay                      | Physical violence by other means                | 27 (20 to 38)    | 38 (27 to 54)    | 40.2% (24.4% to 56.2%)    |
| 35 | Uruguay                      | Physical violence by sharp object               | 4 (3 to 7)       | 7 (5 to 12)      | 81.5% (54.5% to 116.5%)   |
| 36 | Uruguay                      | Poisoning by carbon monoxide                    | 0 (0 to 0)       | 0 (0 to 0)       | 27.9% (16% to 41.3%)      |
| 37 | Uruguay                      | Poisoning by other means                        | 0 (0 to 1)       | 0 (0 to 1)       | -0.6% (-7.8% to 7.2%)     |
| 38 | Uruguay                      | Pulmonary aspiration and foreign body in airway | 1 (0 to 1)       | 1 (0 to 1)       | -30.8% (-37.3% to -24%)   |
| 39 | Uruguay                      | Self-harm by firearm                            | 1 (1 to 1)       | 1 (1 to 2)       | 27.1% (10.3% to 44.7%)    |
| 40 | Uruguay                      | Self-harm by other specified means              | 2 (1 to 3)       | 3 (2 to 5)       | 90.6% (77.3% to 105.4%)   |
| 41 | Uruguay                      | Unintentional firearm injuries                  | 23 (14 to 33)    | 10 (6 to 15)     | -57.7% (-64.1% to -50.9%) |
| 42 | Uruguay                      | Venomous animal contact                         | 3 (1 to 6)       | 3 (1 to 6)       | -15.9% (-20.5% to -11.3%) |
| 43 | Uzbekistan                   | Adverse effects of medical treatment            | 0 (0 to 0)       | 0 (0 to 0)       | 0% (0% to 0%)             |
| 44 | Uzbekistan                   | Conflict and terrorism                          | 0 (0 to 0)       | 0 (0 to 0)       | NA                        |

|    |            |                                                 |                 |                 |                           |
|----|------------|-------------------------------------------------|-----------------|-----------------|---------------------------|
| 1  |            |                                                 |                 |                 |                           |
| 2  | Uzbekistan | Cyclist road injuries                           | 20 (13 to 27)   | 23 (16 to 31)   | 14.4% (1.8% to 24.6%)     |
| 3  | Uzbekistan | Drowning                                        | 1 (0 to 1)      | 1 (0 to 1)      | 1.4% (-8.3% to 11.5%)     |
| 4  | Uzbekistan | Environmental heat and cold exposure            | 5 (4 to 7)      | 4 (3 to 6)      | -19.6% (-27.7% to -12.4%) |
| 5  | Uzbekistan | Executions and police conflict                  | 0 (0 to 0)      | 0 (0 to 0)      | NA                        |
| 6  | Uzbekistan | Exposure to forces of nature                    | 0 (0 to 0)      | 0 (0 to 0)      | NA                        |
| 7  | Uzbekistan | Falls                                           | 123 (94 to 162) | 120 (91 to 160) | -1.9% (-7.5% to 3.3%)     |
| 8  | Uzbekistan | Fire, heat, and hot substances                  | 4 (3 to 8)      | 3 (2 to 6)      | -24.3% (-30.8% to -16.8%) |
| 9  | Uzbekistan | Foreign body in eyes                            | 0 (0 to 0)      | 0 (0 to 0)      | 0.8% (0.4% to 1.4%)       |
| 10 | Uzbekistan | Foreign body in other body part                 | 2 (1 to 4)      | 2 (1 to 4)      | -1.9% (-7.3% to 4.3%)     |
| 11 | Uzbekistan | Motor vehicle road injuries                     | 50 (40 to 63)   | 63 (49 to 79)   | 25.2% (11.8% to 38.3%)    |
| 12 | Uzbekistan | Motorcyclist road injuries                      | 3 (2 to 5)      | 4 (3 to 5)      | 7.9% (-5.5% to 21.9%)     |
| 13 | Uzbekistan | Non-venomous animal contact                     | 3 (2 to 5)      | 3 (1 to 5)      | -12% (-17.4% to -6.1%)    |
| 14 | Uzbekistan | Other exposure to mechanical forces             | 47 (28 to 75)   | 50 (30 to 79)   | 5.7% (0.9% to 11.1%)      |
| 15 | Uzbekistan | Other road injuries                             | 2 (1 to 3)      | 2 (1 to 3)      | 12.3% (-2.1% to 24.9%)    |
| 16 | Uzbekistan | Other transport injuries                        | 4 (3 to 6)      | 4 (3 to 6)      | 1.5% (-3.6% to 7.2%)      |
| 17 | Uzbekistan | Other unintentional injuries                    | 32 (21 to 52)   | 26 (17 to 42)   | -19.9% (-27% to -12.5%)   |
| 18 | Uzbekistan | Pedestrian road injuries                        | 30 (23 to 37)   | 31 (24 to 40)   | 5.5% (-6.9% to 17.9%)     |
| 19 | Uzbekistan | Physical violence by firearm                    | 0 (0 to 0)      | 0 (0 to 0)      | 70.6% (44.5% to 100.4%)   |
| 20 | Uzbekistan | Physical violence by other means                | 16 (11 to 22)   | 12 (8 to 17)    | -24.6% (-34.4% to -14.7%) |
| 21 | Uzbekistan | Physical violence by sharp object               | 4 (2 to 6)      | 2 (1 to 4)      | -37% (-46.7% to -27.2%)   |
| 22 | Uzbekistan | Poisoning by carbon monoxide                    | 0 (0 to 0)      | 0 (0 to 0)      | 19.7% (9.9% to 31.4%)     |
| 23 | Uzbekistan | Poisoning by other means                        | 0 (0 to 1)      | 0 (0 to 1)      | -4.1% (-9.7% to 3.3%)     |
| 24 | Uzbekistan | Pulmonary aspiration and foreign body in airway | 1 (1 to 2)      | 1 (0 to 1)      | -12% (-19.4% to -4.1%)    |
| 25 | Uzbekistan | Self-harm by firearm                            | 0 (0 to 0)      | 0 (0 to 0)      | 24.6% (4% to 46.7%)       |
| 26 | Uzbekistan | Self-harm by other specified means              | 2 (1 to 3)      | 3 (2 to 5)      | 65.1% (53.7% to 75.9%)    |
| 27 | Uzbekistan | Unintentional firearm injuries                  | 1 (1 to 2)      | 1 (1 to 2)      | 4% (-4.9% to 13.2%)       |
| 28 | Uzbekistan | Venomous animal contact                         | 3 (1 to 6)      | 3 (1 to 5)      | -11.7% (-16.7% to -5.9%)  |
| 29 | Vanuatu    | Adverse effects of medical treatment            | 0 (0 to 0)      | 0 (0 to 0)      | 0% (0% to 0%)             |
| 30 | Vanuatu    | Conflict and terrorism                          | 0 (0 to 0)      | 0 (0 to 0)      | NA                        |
| 31 | Vanuatu    | Cyclist road injuries                           | 13 (8 to 18)    | 13 (9 to 19)    | 5.8% (-1.2% to 13.1%)     |
| 32 | Vanuatu    | Drowning                                        | 0 (0 to 1)      | 0 (0 to 1)      | -1.4% (-9.9% to 8.6%)     |
| 33 | Vanuatu    | Environmental heat and cold exposure            | 2 (1 to 3)      | 2 (1 to 3)      | -4.2% (-9.5% to 1%)       |
| 34 | Vanuatu    | Executions and police conflict                  | 0 (0 to 0)      | 0 (0 to 0)      | NA                        |
| 35 | Vanuatu    | Exposure to forces of nature                    | 0 (0 to 0)      | 0 (0 to 0)      | NA                        |
| 36 | Vanuatu    | Falls                                           | 43 (34 to 57)   | 59 (46 to 78)   | 36.8% (31.3% to 42.4%)    |
| 37 | Vanuatu    | Fire, heat, and hot substances                  | 1 (1 to 2)      | 1 (1 to 2)      | -4.2% (-9.4% to 1.7%)     |
| 38 | Vanuatu    | Foreign body in eyes                            | 0 (0 to 0)      | 0 (0 to 0)      | -1.3% (-2.1% to -0.8%)    |
| 39 | Vanuatu    | Foreign body in other body part                 | 1 (0 to 1)      | 1 (0 to 1)      | -4% (-8.4% to 0.6%)       |
| 40 | Vanuatu    | Motor vehicle road injuries                     | 29 (22 to 37)   | 29 (22 to 37)   | -0.5% (-7.9% to 6.7%)     |
| 41 | Vanuatu    | Motorcyclist road injuries                      | 15 (11 to 19)   | 17 (13 to 22)   | 14.9% (5.1% to 25%)       |
| 42 | Vanuatu    | Non-venomous animal contact                     | 5 (3 to 9)      | 5 (3 to 8)      | -16% (-20.2% to -11.3%)   |
| 43 | Vanuatu    | Other exposure to mechanical forces             | 14 (8 to 23)    | 12 (7 to 19)    | -15.9% (-21.2% to -11.4%) |
| 44 | Vanuatu    | Other road injuries                             | 2 (1 to 3)      | 2 (1 to 3)      | 3.8% (-5.3% to 12.8%)     |
| 45 |            |                                                 |                 |                 |                           |
| 46 |            |                                                 |                 |                 |                           |

|    |                                    |                                                 |                 |                |                           |
|----|------------------------------------|-------------------------------------------------|-----------------|----------------|---------------------------|
| 1  |                                    |                                                 |                 |                |                           |
| 2  | Vanuatu                            | Other transport injuries                        | 7 (5 to 9)      | 6 (5 to 8)     | -7.3% (-12% to -2.8%)     |
| 3  | Vanuatu                            | Other unintentional injuries                    | 7 (5 to 12)     | 7 (4 to 11)    | -7.4% (-11.6% to -2.7%)   |
| 4  | Vanuatu                            | Pedestrian road injuries                        | 18 (13 to 23)   | 19 (14 to 24)  | 6% (-1% to 13.2%)         |
| 5  | Vanuatu                            | Physical violence by firearm                    | 0 (0 to 0)      | 0 (0 to 0)     | 19.2% (7% to 32.2%)       |
| 6  | Vanuatu                            | Physical violence by other means                | 14 (10 to 20)   | 15 (10 to 21)  | 1.8% (-3.1% to 7.8%)      |
| 7  | Vanuatu                            | Physical violence by sharp object               | 2 (1 to 3)      | 1 (1 to 2)     | -6.5% (-14.5% to 1.6%)    |
| 8  | Vanuatu                            | Poisoning by carbon monoxide                    | 0 (0 to 0)      | 0 (0 to 0)     | 0.4% (-9.5% to 10.2%)     |
| 9  | Vanuatu                            | Poisoning by other means                        | 0 (0 to 0)      | 0 (0 to 0)     | -17.5% (-24.2% to -10.4%) |
| 10 | Vanuatu                            | Pulmonary aspiration and foreign body in airway | 0 (0 to 0)      | 0 (0 to 0)     | 0.4% (-11.5% to 12.8%)    |
| 11 | Vanuatu                            | Self-harm by firearm                            | 1 (1 to 2)      | 1 (1 to 2)     | -3.3% (-16.2% to 10.5%)   |
| 12 | Vanuatu                            | Self-harm by other specified means              | 2 (1 to 4)      | 2 (2 to 4)     | 4.6% (-3.2% to 12.6%)     |
| 13 | Vanuatu                            | Unintentional firearm injuries                  | 2 (1 to 3)      | 2 (1 to 3)     | -23.9% (-30.6% to -17.5%) |
| 14 | Vanuatu                            | Venomous animal contact                         | 3 (1 to 6)      | 3 (1 to 6)     | -9.4% (-15% to -3%)       |
| 15 | Venezuela (Bolivarian Republic of) | Adverse effects of medical treatment            | 0 (0 to 0)      | 0 (0 to 0)     | 0% (0% to 0%)             |
| 16 | Venezuela (Bolivarian Republic of) | Conflict and terrorism                          | 2 (1 to 5)      | 0 (0 to 0)     | NA                        |
| 17 | Venezuela (Bolivarian Republic of) | Cyclist road injuries                           | 31 (21 to 43)   | 21 (14 to 30)  | -31.6% (-40.3% to -22.6%) |
| 18 | Venezuela (Bolivarian Republic of) | Drowning                                        | 0 (0 to 0)      | 0 (0 to 0)     | 10.3% (-4.6% to 27.7%)    |
| 19 | Venezuela (Bolivarian Republic of) | Environmental heat and cold exposure            | 3 (2 to 4)      | 3 (2 to 4)     | -0.1% (-4.8% to 4%)       |
| 20 | Venezuela (Bolivarian Republic of) | Executions and police conflict                  | 0 (0 to 0)      | 0 (0 to 0)     | NA                        |
| 21 | Venezuela (Bolivarian Republic of) | Exposure to forces of nature                    | 0 (0 to 0)      | 0 (0 to 0)     | NA                        |
| 22 | Venezuela (Bolivarian Republic of) | Falls                                           | 101 (78 to 132) | 93 (71 to 125) | -7.4% (-12.6% to -2.2%)   |
| 23 | Venezuela (Bolivarian Republic of) | Fire, heat, and hot substances                  | 4 (2 to 6)      | 3 (2 to 6)     | -7.8% (-12.6% to -2.2%)   |
| 24 | Venezuela (Bolivarian Republic of) | Foreign body in eyes                            | 0 (0 to 0)      | 0 (0 to 0)     | -0.3% (-0.6% to -0.1%)    |
| 25 | Venezuela (Bolivarian Republic of) | Foreign body in other body part                 | 1 (1 to 3)      | 1 (1 to 2)     | -12.8% (-18.7% to -7.8%)  |
| 26 | Venezuela (Bolivarian Republic of) | Motor vehicle road injuries                     | 56 (43 to 72)   | 48 (37 to 61)  | -14.9% (-24.9% to -4.3%)  |
| 27 | Venezuela (Bolivarian Republic of) | Motorcyclist road injuries                      | 15 (12 to 20)   | 17 (13 to 22)  | 10.8% (-3.3% to 27.5%)    |
| 28 | Venezuela (Bolivarian Republic of) | Non-venomous animal contact                     | 6 (3 to 11)     | 5 (3 to 9)     | -14.4% (-19.6% to -9.1%)  |
| 29 | Venezuela (Bolivarian Republic of) | Other exposure to mechanical forces             | 53 (31 to 87)   | 57 (33 to 92)  | 6.9% (-1.2% to 16.9%)     |
| 30 | Venezuela (Bolivarian Republic of) | Other road injuries                             | 8 (5 to 13)     | 6 (4 to 10)    | -21% (-31.3% to -9.8%)    |
| 31 | Venezuela (Bolivarian Republic of) | Other transport injuries                        | 5 (4 to 7)      | 5 (4 to 7)     | 1.8% (-4.1% to 9.2%)      |
| 32 | Venezuela (Bolivarian Republic of) | Other unintentional injuries                    | 13 (9 to 21)    | 11 (7 to 18)   | -18.2% (-24.6% to -11.2%) |
| 33 | Venezuela (Bolivarian Republic of) | Pedestrian road injuries                        | 47 (37 to 59)   | 28 (22 to 35)  | -40.1% (-47% to -32.7%)   |
| 34 | Venezuela (Bolivarian Republic of) | Physical violence by firearm                    | 3 (2 to 4)      | 13 (9 to 17)   | 325% (234.1% to 456.9%)   |
| 35 | Venezuela (Bolivarian Republic of) | Physical violence by other means                | 21 (15 to 30)   | 33 (23 to 50)  | 58.5% (35.9% to 86.2%)    |
| 36 | Venezuela (Bolivarian Republic of) | Physical violence by sharp object               | 8 (5 to 12)     | 8 (5 to 14)    | 9% (-11.3% to 30.1%)      |
| 37 | Venezuela (Bolivarian Republic of) | Poisoning by carbon monoxide                    | 0 (0 to 0)      | 0 (0 to 0)     | 15.7% (4.4% to 28.2%)     |
| 38 | Venezuela (Bolivarian Republic of) | Poisoning by other means                        | 0 (0 to 0)      | 0 (0 to 0)     | -10.3% (-17% to -3.1%)    |
| 39 | Venezuela (Bolivarian Republic of) | Pulmonary aspiration and foreign body in airway | 1 (0 to 1)      | 1 (0 to 1)     | -31% (-38.8% to -22.8%)   |
| 40 | Venezuela (Bolivarian Republic of) | Self-harm by firearm                            | 0 (0 to 1)      | 0 (0 to 1)     | 34.9% (20.5% to 52.9%)    |
| 41 | Venezuela (Bolivarian Republic of) | Self-harm by other specified means              | 0 (0 to 1)      | 0 (0 to 1)     | 23.6% (12.5% to 35.6%)    |
| 42 | Venezuela (Bolivarian Republic of) | Unintentional firearm injuries                  | 7 (4 to 10)     | 8 (5 to 11)    | 13.3% (-0.8% to 30.6%)    |
| 43 | Venezuela (Bolivarian Republic of) | Venomous animal contact                         | 8 (4 to 14)     | 7 (3 to 13)    | -7.6% (-12.1% to -2%)     |
| 44 | Viet Nam                           | Adverse effects of medical treatment            | 0 (0 to 0)      | 0 (0 to 0)     | 0% (0% to 0%)             |
| 45 |                                    |                                                 |                 |                |                           |
| 46 |                                    |                                                 |                 |                |                           |

|    |          |                                                 |               |                  |                           |
|----|----------|-------------------------------------------------|---------------|------------------|---------------------------|
| 1  |          |                                                 |               |                  |                           |
| 2  | Viet Nam | Conflict and terrorism                          | 0 (0 to 0)    | 0 (0 to 0)       | NA                        |
| 3  | Viet Nam | Cyclist road injuries                           | 18 (12 to 25) | 25 (18 to 35)    | 40.6% (28.1% to 54.1%)    |
| 4  | Viet Nam | Drowning                                        | 1 (0 to 1)    | 1 (0 to 1)       | 25% (11.3% to 41%)        |
| 5  | Viet Nam | Environmental heat and cold exposure            | 2 (1 to 2)    | 2 (1 to 2)       | 1.9% (-4.1% to 6.5%)      |
| 6  | Viet Nam | Executions and police conflict                  | 0 (0 to 0)    | 0 (0 to 0)       | NA                        |
| 7  | Viet Nam | Exposure to forces of nature                    | 1 (1 to 3)    | 0 (0 to 0)       | NA                        |
| 8  | Viet Nam | Falls                                           | 64 (51 to 82) | 107 (85 to 134)  | 65.7% (59.5% to 71.9%)    |
| 9  | Viet Nam | Fire, heat, and hot substances                  | 2 (1 to 3)    | 2 (1 to 3)       | 14% (6.9% to 21.5%)       |
| 10 | Viet Nam | Foreign body in eyes                            | 0 (0 to 0)    | 0 (0 to 0)       | 2.4% (1.6% to 3.4%)       |
| 11 | Viet Nam | Foreign body in other body part                 | 1 (1 to 2)    | 1 (1 to 2)       | -0.5% (-7% to 8.8%)       |
| 12 | Viet Nam | Motor vehicle road injuries                     | 35 (26 to 45) | 44 (33 to 57)    | 27.6% (16.9% to 40%)      |
| 13 | Viet Nam | Motorcyclist road injuries                      | 43 (34 to 55) | 63 (50 to 78)    | 44.1% (32.2% to 58.4%)    |
| 14 | Viet Nam | Non-venomous animal contact                     | 6 (3 to 10)   | 5 (3 to 8)       | -23.2% (-29.5% to -16.3%) |
| 15 | Viet Nam | Other exposure to mechanical forces             | 29 (17 to 47) | 25 (15 to 40)    | -14.7% (-20% to -8.1%)    |
| 16 | Viet Nam | Other road injuries                             | 1 (1 to 2)    | 1 (1 to 2)       | 27.7% (15.8% to 42.2%)    |
| 17 | Viet Nam | Other transport injuries                        | 5 (4 to 7)    | 6 (4 to 8)       | 7.2% (-0.2% to 14.6%)     |
| 18 | Viet Nam | Other unintentional injuries                    | 9 (6 to 15)   | 7 (4 to 11)      | -27.3% (-32.5% to -22.1%) |
| 19 | Viet Nam | Pedestrian road injuries                        | 18 (13 to 22) | 15 (11 to 19)    | -14.3% (-21.5% to -7%)    |
| 20 | Viet Nam | Physical violence by firearm                    | 0 (0 to 0)    | 0 (0 to 1)       | 136% (109.4% to 168%)     |
| 21 | Viet Nam | Physical violence by other means                | 18 (13 to 26) | 19 (14 to 26)    | 2% (-4.1% to 9.4%)        |
| 22 | Viet Nam | Physical violence by sharp object               | 3 (2 to 5)    | 2 (1 to 4)       | -26.3% (-34.9% to -16.6%) |
| 23 | Viet Nam | Poisoning by carbon monoxide                    | 0 (0 to 0)    | 0 (0 to 0)       | 9.8% (-1.8% to 22.7%)     |
| 24 | Viet Nam | Poisoning by other means                        | 0 (0 to 0)    | 0 (0 to 0)       | -34.9% (-42.5% to -26.1%) |
| 25 | Viet Nam | Pulmonary aspiration and foreign body in airway | 0 (0 to 1)    | 0 (0 to 0)       | -23.5% (-30.6% to -15.3%) |
| 26 | Viet Nam | Self-harm by firearm                            | 0 (0 to 0)    | 0 (0 to 0)       | 93.3% (65.7% to 133.7%)   |
| 27 | Viet Nam | Self-harm by other specified means              | 2 (1 to 3)    | 2 (1 to 3)       | 12% (6.1% to 18.7%)       |
| 28 | Viet Nam | Unintentional firearm injuries                  | 3 (2 to 5)    | 2 (1 to 3)       | -33.6% (-40.9% to -24.8%) |
| 29 | Viet Nam | Venomous animal contact                         | 2 (1 to 5)    | 2 (1 to 4)       | -25.2% (-32.8% to -16.9%) |
| 30 | Yemen    | Adverse effects of medical treatment            | 0 (0 to 0)    | 0 (0 to 0)       | 0% (0% to 0%)             |
| 31 | Yemen    | Conflict and terrorism                          | 0 (0 to 0)    | 256 (103 to 590) | NA                        |
| 32 | Yemen    | Cyclist road injuries                           | 15 (9 to 21)  | 14 (9 to 20)     | -4.3% (-12.2% to 5.5%)    |
| 33 | Yemen    | Drowning                                        | 0 (0 to 0)    | 0 (0 to 0)       | -25.8% (-32.7% to -17.8%) |
| 34 | Yemen    | Environmental heat and cold exposure            | 3 (2 to 4)    | 3 (2 to 4)       | 0.9% (-4.5% to 5.9%)      |
| 35 | Yemen    | Executions and police conflict                  | 0 (0 to 0)    | 0 (0 to 0)       | NA                        |
| 36 | Yemen    | Exposure to forces of nature                    | 0 (0 to 0)    | 0 (0 to 0)       | NA                        |
| 37 | Yemen    | Falls                                           | 66 (50 to 86) | 77 (59 to 99)    | 17% (12.5% to 22%)        |
| 38 | Yemen    | Fire, heat, and hot substances                  | 1 (1 to 2)    | 1 (0 to 1)       | -34.2% (-39.8% to -28.7%) |
| 39 | Yemen    | Foreign body in eyes                            | 0 (0 to 0)    | 0 (0 to 0)       | 0.7% (0% to 1.9%)         |
| 40 | Yemen    | Foreign body in other body part                 | 1 (1 to 3)    | 1 (1 to 3)       | -1.5% (-7.3% to 3.4%)     |
| 41 | Yemen    | Motor vehicle road injuries                     | 47 (37 to 60) | 39 (30 to 49)    | -17.8% (-24% to -10.9%)   |
| 42 | Yemen    | Motorcyclist road injuries                      | 11 (8 to 15)  | 9 (7 to 12)      | -19.3% (-26.8% to -10.8%) |
| 43 | Yemen    | Non-venomous animal contact                     | 4 (2 to 7)    | 4 (2 to 8)       | 8.8% (3.4% to 14.1%)      |
| 44 | Yemen    | Other exposure to mechanical forces             | 27 (17 to 43) | 23 (14 to 37)    | -15.2% (-20.3% to -9.8%)  |
| 45 |          |                                                 |               |                  |                           |
| 46 |          |                                                 |               |                  |                           |

|    |        |                                                 |               |               |                           |
|----|--------|-------------------------------------------------|---------------|---------------|---------------------------|
| 1  |        |                                                 |               |               |                           |
| 2  | Yemen  | Other road injuries                             | 2 (1 to 3)    | 2 (1 to 3)    | 0.8% (-8.6% to 11.7%)     |
| 3  | Yemen  | Other transport injuries                        | 5 (4 to 7)    | 5 (4 to 7)    | 2.1% (-3.4% to 7.9%)      |
| 4  | Yemen  | Other unintentional injuries                    | 21 (14 to 34) | 16 (11 to 26) | -24% (-27.9% to -19.7%)   |
| 5  | Yemen  | Pedestrian road injuries                        | 30 (23 to 38) | 26 (20 to 33) | -14% (-20.2% to -7.1%)    |
| 6  | Yemen  | Physical violence by firearm                    | 0 (0 to 0)    | 0 (0 to 0)    | 116.3% (90.7% to 145.2%)  |
| 7  | Yemen  | Physical violence by other means                | 10 (7 to 14)  | 13 (9 to 19)  | 28.9% (18.4% to 41%)      |
| 8  | Yemen  | Physical violence by sharp object               | 1 (1 to 2)    | 1 (1 to 2)    | -10.4% (-18.8% to -0.7%)  |
| 9  | Yemen  | Poisoning by carbon monoxide                    | 0 (0 to 0)    | 0 (0 to 0)    | 13.1% (-0.5% to 29.7%)    |
| 10 | Yemen  | Poisoning by other means                        | 0 (0 to 0)    | 0 (0 to 0)    | -31.1% (-38% to -23.3%)   |
| 11 | Yemen  | Pulmonary aspiration and foreign body in airway | 0 (0 to 1)    | 0 (0 to 1)    | -14.1% (-22.4% to -2.7%)  |
| 12 | Yemen  | Self-harm by firearm                            | 0 (0 to 0)    | 0 (0 to 0)    | 19% (6% to 34.3%)         |
| 13 | Yemen  | Self-harm by other specified means              | 1 (1 to 2)    | 1 (1 to 2)    | 11.6% (5.9% to 17.3%)     |
| 14 | Yemen  | Unintentional firearm injuries                  | 2 (1 to 3)    | 1 (1 to 2)    | -16.5% (-24.2% to -7.8%)  |
| 15 | Yemen  | Venomous animal contact                         | 2 (1 to 4)    | 2 (1 to 5)    | 10.3% (3.7% to 17.9%)     |
| 16 | Zambia | Adverse effects of medical treatment            | 0 (0 to 0)    | 0 (0 to 0)    | 0% (0% to 0%)             |
| 17 | Zambia | Conflict and terrorism                          | 3 (1 to 7)    | 0 (0 to 0)    | NA                        |
| 18 | Zambia | Cyclist road injuries                           | 34 (23 to 48) | 34 (23 to 48) | 1.6% (-6% to 9.9%)        |
| 19 | Zambia | Drowning                                        | 0 (0 to 0)    | 0 (0 to 0)    | -8.7% (-16.9% to 0.5%)    |
| 20 | Zambia | Environmental heat and cold exposure            | 0 (0 to 1)    | 0 (0 to 1)    | -3.1% (-10% to 4.8%)      |
| 21 | Zambia | Executions and police conflict                  | 0 (0 to 0)    | 0 (0 to 0)    | NA                        |
| 22 | Zambia | Exposure to forces of nature                    | 0 (0 to 0)    | 0 (0 to 0)    | NA                        |
| 23 | Zambia | Falls                                           | 25 (16 to 38) | 31 (20 to 48) | 22.9% (17.6% to 28.3%)    |
| 24 | Zambia | Fire, heat, and hot substances                  | 0 (0 to 1)    | 0 (0 to 1)    | -16.2% (-21.5% to -10.5%) |
| 25 | Zambia | Foreign body in eyes                            | 0 (0 to 0)    | 0 (0 to 0)    | -0.6% (-1.8% to 0.1%)     |
| 26 | Zambia | Foreign body in other body part                 | 3 (1 to 7)    | 3 (1 to 7)    | 6.9% (1.5% to 13.4%)      |
| 27 | Zambia | Motor vehicle road injuries                     | 25 (17 to 36) | 25 (17 to 36) | 0.1% (-8.2% to 9.7%)      |
| 28 | Zambia | Motorcyclist road injuries                      | 11 (8 to 16)  | 10 (7 to 14)  | -11.2% (-18.4% to -3.3%)  |
| 29 | Zambia | Non-venomous animal contact                     | 5 (2 to 11)   | 4 (2 to 9)    | -18.4% (-23.2% to -13%)   |
| 30 | Zambia | Other exposure to mechanical forces             | 27 (13 to 49) | 24 (12 to 44) | -9.9% (-16.4% to -2.2%)   |
| 31 | Zambia | Other road injuries                             | 1 (0 to 2)    | 1 (1 to 2)    | 14.8% (4.9% to 26%)       |
| 32 | Zambia | Other transport injuries                        | 4 (3 to 5)    | 3 (2 to 4)    | -14.6% (-20.4% to -9.1%)  |
| 33 | Zambia | Other unintentional injuries                    | 3 (2 to 4)    | 2 (1 to 4)    | -13.2% (-21.7% to -4.8%)  |
| 34 | Zambia | Pedestrian road injuries                        | 49 (36 to 65) | 46 (34 to 60) | -6.5% (-12.5% to 0.1%)    |
| 35 | Zambia | Physical violence by firearm                    | 0 (0 to 0)    | 0 (0 to 0)    | 100.3% (77.4% to 127.1%)  |
| 36 | Zambia | Physical violence by other means                | 7 (4 to 10)   | 9 (6 to 14)   | 41.4% (29% to 54.8%)      |
| 37 | Zambia | Physical violence by sharp object               | 2 (1 to 3)    | 3 (1 to 5)    | 51.9% (34.5% to 76.1%)    |
| 38 | Zambia | Poisoning by carbon monoxide                    | 0 (0 to 0)    | 0 (0 to 0)    | 12.8% (-1.2% to 27.7%)    |
| 39 | Zambia | Poisoning by other means                        | 0 (0 to 0)    | 0 (0 to 0)    | -22.7% (-31.3% to -14.4%) |
| 40 | Zambia | Pulmonary aspiration and foreign body in airway | 0 (0 to 0)    | 0 (0 to 0)    | -13.5% (-23.7% to -1.6%)  |
| 41 | Zambia | Self-harm by firearm                            | 0 (0 to 0)    | 0 (0 to 0)    | 35% (23.8% to 48.6%)      |
| 42 | Zambia | Self-harm by other specified means              | 0 (0 to 0)    | 0 (0 to 0)    | 6.1% (-0.6% to 13.6%)     |
| 43 | Zambia | Unintentional firearm injuries                  | 1 (0 to 2)    | 1 (0 to 2)    | -21.4% (-29.9% to -11.9%) |
| 44 | Zambia | Venomous animal contact                         | 1 (0 to 2)    | 1 (0 to 2)    | -18% (-27% to -8.4%)      |
| 45 |        |                                                 |               |               |                           |
| 46 |        |                                                 |               |               |                           |

|    |                                                             |                                                 |               |               |                           |
|----|-------------------------------------------------------------|-------------------------------------------------|---------------|---------------|---------------------------|
| 1  |                                                             |                                                 |               |               |                           |
| 2  | Zimbabwe                                                    | Adverse effects of medical treatment            | 0 (0 to 0)    | 0 (0 to 0)    | 0% (0% to 0%)             |
| 3  | Zimbabwe                                                    | Conflict and terrorism                          | 1 (0 to 3)    | 0 (0 to 1)    | NA                        |
| 4  | Zimbabwe                                                    | Cyclist road injuries                           | 10 (6 to 16)  | 13 (8 to 19)  | 24.1% (10.4% to 40.6%)    |
| 5  | Zimbabwe                                                    | Drowning                                        | 0 (0 to 0)    | 0 (0 to 0)    | -14.4% (-21.5% to -7.2%)  |
| 6  | Zimbabwe                                                    | Environmental heat and cold exposure            | 0 (0 to 1)    | 0 (0 to 1)    | -1% (-7.7% to 5.2%)       |
| 7  | Zimbabwe                                                    | Executions and police conflict                  | 0 (0 to 0)    | 0 (0 to 1)    | NA                        |
| 8  | Zimbabwe                                                    | Exposure to forces of nature                    | 0 (0 to 0)    | 9 (4 to 20)   | NA                        |
| 9  | Zimbabwe                                                    | Falls                                           | 22 (14 to 33) | 22 (14 to 33) | 0.1% (-3.4% to 3.9%)      |
| 10 | Zimbabwe                                                    | Fire, heat, and hot substances                  | 0 (0 to 0)    | 0 (0 to 0)    | 6.1% (-0.3% to 11.8%)     |
| 11 | Zimbabwe                                                    | Foreign body in eyes                            | 0 (0 to 0)    | 0 (0 to 0)    | -1.4% (-3.1% to -0.3%)    |
| 12 | Zimbabwe                                                    | Foreign body in other body part                 | 4 (2 to 9)    | 4 (2 to 9)    | -4.7% (-10.4% to 1.7%)    |
| 13 | Zimbabwe                                                    | Motor vehicle road injuries                     | 19 (12 to 27) | 23 (16 to 33) | 22.3% (8.7% to 38.2%)     |
| 14 | Zimbabwe                                                    | Motorcyclist road injuries                      | 10 (7 to 15)  | 9 (6 to 12)   | -17.2% (-25.4% to -7.7%)  |
| 15 | Zimbabwe                                                    | Non-venomous animal contact                     | 3 (2 to 7)    | 3 (2 to 7)    | 5.4% (-0.4% to 10.8%)     |
| 16 | Zimbabwe                                                    | Other exposure to mechanical forces             | 24 (12 to 43) | 22 (11 to 39) | -7.4% (-12.2% to -2%)     |
| 17 | Zimbabwe                                                    | Other road injuries                             | 2 (1 to 3)    | 2 (1 to 4)    | 37.8% (20% to 63.2%)      |
| 18 | Zimbabwe                                                    | Other transport injuries                        | 4 (3 to 6)    | 5 (4 to 7)    | 15.1% (8.2% to 23.1%)     |
| 19 | Zimbabwe                                                    | Other unintentional injuries                    | 3 (2 to 5)    | 3 (2 to 4)    | -7.1% (-11.3% to -2.1%)   |
| 20 | Zimbabwe                                                    | Pedestrian road injuries                        | 45 (34 to 57) | 30 (22 to 39) | -32.5% (-38.5% to -26.4%) |
| 21 | Zimbabwe                                                    | Physical violence by firearm                    | 0 (0 to 0)    | 0 (0 to 0)    | -7.2% (-17.6% to 3%)      |
| 22 | Zimbabwe                                                    | Physical violence by other means                | 10 (7 to 15)  | 11 (7 to 16)  | 5.6% (-3.4% to 16.4%)     |
| 23 | Zimbabwe                                                    | Physical violence by sharp object               | 2 (1 to 4)    | 2 (1 to 4)    | 4.9% (-5.5% to 16.6%)     |
| 24 | Zimbabwe                                                    | Poisoning by carbon monoxide                    | 0 (0 to 0)    | 0 (0 to 0)    | -9.3% (-17.3% to 0.1%)    |
| 25 | Zimbabwe                                                    | Poisoning by other means                        | 0 (0 to 0)    | 0 (0 to 0)    | -5.5% (-12.2% to 1.1%)    |
| 26 | Zimbabwe                                                    | Pulmonary aspiration and foreign body in airway | 0 (0 to 0)    | 0 (0 to 0)    | 10.2% (1.9% to 19.6%)     |
| 27 | Zimbabwe                                                    | Self-harm by firearm                            | 0 (0 to 0)    | 0 (0 to 0)    | 15.6% (4.9% to 25.3%)     |
| 28 | Zimbabwe                                                    | Self-harm by other specified means              | 0 (0 to 0)    | 0 (0 to 0)    | 30.1% (22.4% to 38%)      |
| 29 | Zimbabwe                                                    | Unintentional firearm injuries                  | 0 (0 to 1)    | 0 (0 to 1)    | -4.5% (-12.4% to 4.4%)    |
| 30 | Zimbabwe                                                    | Venomous animal contact                         | 0 (0 to 1)    | 0 (0 to 1)    | 12.9% (5.1% to 22.4%)     |
| 31 | Abbreviations: UI, uncertainty interval; NA, not applicable |                                                 |               |               |                           |
| 32 |                                                             |                                                 |               |               |                           |
| 33 |                                                             |                                                 |               |               |                           |
| 34 |                                                             |                                                 |               |               |                           |
| 35 |                                                             |                                                 |               |               |                           |
| 36 |                                                             |                                                 |               |               |                           |
| 37 |                                                             |                                                 |               |               |                           |
| 38 |                                                             |                                                 |               |               |                           |
| 39 |                                                             |                                                 |               |               |                           |
| 40 |                                                             |                                                 |               |               |                           |
| 41 |                                                             |                                                 |               |               |                           |
| 42 |                                                             |                                                 |               |               |                           |
| 43 |                                                             |                                                 |               |               |                           |
| 44 |                                                             |                                                 |               |               |                           |
| 45 |                                                             |                                                 |               |               |                           |
| 46 |                                                             |                                                 |               |               |                           |

eTable 15. Incidence for 1990 and 2019 and percentage changes of age-standardized rates by location and cause for spinal cord injury, 1990–2019

| Location    | Cause                                           | Age-standardized rates per 100,000 (95% UI) (1990) | Age-standardized rates per 100,000 (95% UI) (2019) | Percentage change of age-standardized rates (95% UI) (1990–2019) |
|-------------|-------------------------------------------------|----------------------------------------------------|----------------------------------------------------|------------------------------------------------------------------|
| Afghanistan | Adverse effects of medical treatment            | 0 (0 to 0)                                         | 0 (0 to 0)                                         | 0% (0% to 0%)                                                    |
| Afghanistan | Conflict and terrorism                          | 7 (2 to 21)                                        | 40 (8 to 128)                                      | NA                                                               |
| Afghanistan | Cyclist road injuries                           | 0 (0 to 0)                                         | 0 (0 to 0)                                         | -6.2% (-14.7% to 2.5%)                                           |
| Afghanistan | Drowning                                        | 0 (0 to 0)                                         | 0 (0 to 0)                                         | -20.4% (-25.9% to -13.6%)                                        |
| Afghanistan | Environmental heat and cold exposure            | 0 (0 to 0)                                         | 0 (0 to 0)                                         | -0.9% (-5.2% to 4.8%)                                            |
| Afghanistan | Executions and police conflict                  | 0 (0 to 0)                                         | 0 (0 to 0)                                         | NA                                                               |
| Afghanistan | Exposure to forces of nature                    | 0 (0 to 0)                                         | 0 (0 to 0)                                         | NA                                                               |
| Afghanistan | Falls                                           | 1 (1 to 1)                                         | 1 (1 to 2)                                         | 24.6% (20.1% to 29.1%)                                           |
| Afghanistan | Fire, heat, and hot substances                  | 0 (0 to 0)                                         | 0 (0 to 0)                                         | -10.1% (-16.6% to -2%)                                           |
| Afghanistan | Foreign body in eyes                            | 0 (0 to 0)                                         | 0 (0 to 0)                                         | 0% (0% to 0%)                                                    |
| Afghanistan | Foreign body in other body part                 | 0 (0 to 0)                                         | 0 (0 to 0)                                         | -2.2% (-5.7% to 1.4%)                                            |
| Afghanistan | Motor vehicle road injuries                     | 0 (0 to 1)                                         | 0 (0 to 1)                                         | -19% (-25.6% to -12%)                                            |
| Afghanistan | Motorcyclist road injuries                      | 0 (0 to 0)                                         | 0 (0 to 0)                                         | -8.9% (-18.5% to 0.9%)                                           |
| Afghanistan | Non-venomous animal contact                     | 0 (0 to 0)                                         | 0 (0 to 0)                                         | -5.5% (-11.1% to -0.2%)                                          |
| Afghanistan | Other exposure to mechanical forces             | 0 (0 to 1)                                         | 0 (0 to 1)                                         | -3.8% (-9.3% to 2.1%)                                            |
| Afghanistan | Other road injuries                             | 0 (0 to 0)                                         | 0 (0 to 0)                                         | -3.9% (-14.2% to 6.9%)                                           |
| Afghanistan | Other transport injuries                        | 0 (0 to 0)                                         | 0 (0 to 0)                                         | 4.7% (0.6% to 9.5%)                                              |
| Afghanistan | Other unintentional injuries                    | 0 (0 to 0)                                         | 0 (0 to 0)                                         | -21.3% (-25.4% to -16.9%)                                        |
| Afghanistan | Pedestrian road injuries                        | 0 (0 to 0)                                         | 0 (0 to 0)                                         | -19.8% (-26.9% to -12.1%)                                        |
| Afghanistan | Physical violence by firearm                    | 0 (0 to 0)                                         | 0 (0 to 0)                                         | 21.9% (6% to 44.7%)                                              |
| Afghanistan | Physical violence by other means                | 0 (0 to 1)                                         | 0 (0 to 1)                                         | 6.4% (-1.5% to 15.3%)                                            |
| Afghanistan | Physical violence by sharp object               | 0 (0 to 0)                                         | 0 (0 to 0)                                         | -20.8% (-29.7% to -12.6%)                                        |
| Afghanistan | Poisoning by carbon monoxide                    | 0 (0 to 0)                                         | 0 (0 to 0)                                         | 31.4% (17.9% to 46.6%)                                           |
| Afghanistan | Poisoning by other means                        | 0 (0 to 0)                                         | 0 (0 to 0)                                         | -16.5% (-23.1% to -9.3%)                                         |
| Afghanistan | Pulmonary aspiration and foreign body in airway | 0 (0 to 0)                                         | 0 (0 to 0)                                         | -20.2% (-28.9% to -11.3%)                                        |
| Afghanistan | Self-harm by firearm                            | 0 (0 to 0)                                         | 0 (0 to 0)                                         | 13.2% (2.1% to 27.9%)                                            |
| Afghanistan | Self-harm by other specified means              | 0 (0 to 0)                                         | 0 (0 to 0)                                         | -15.3% (-20.4% to -10.2%)                                        |
| Afghanistan | Unintentional firearm injuries                  | 0 (0 to 0)                                         | 0 (0 to 0)                                         | -2.9% (-10.4% to 5.5%)                                           |
| Afghanistan | Venomous animal contact                         | 0 (0 to 0)                                         | 0 (0 to 0)                                         | -2.3% (-8.8% to 6%)                                              |
| Albania     | Adverse effects of medical treatment            | 0 (0 to 0)                                         | 0 (0 to 0)                                         | 0% (0% to 0%)                                                    |
| Albania     | Conflict and terrorism                          | 0 (0 to 0)                                         | 0 (0 to 0)                                         | NA                                                               |
| Albania     | Cyclist road injuries                           | 1 (0 to 1)                                         | 1 (0 to 1)                                         | 9.4% (0.4% to 19.7%)                                             |
| Albania     | Drowning                                        | 0 (0 to 0)                                         | 0 (0 to 0)                                         | 106.1% (80.9% to 132.1%)                                         |
| Albania     | Environmental heat and cold exposure            | 0 (0 to 0)                                         | 0 (0 to 0)                                         | 3.7% (0% to 7.3%)                                                |
| Albania     | Executions and police conflict                  | 0 (0 to 0)                                         | 0 (0 to 0)                                         | NA                                                               |
| Albania     | Exposure to forces of nature                    | 0 (0 to 0)                                         | 0 (0 to 0)                                         | NA                                                               |
| Albania     | Falls                                           | 3 (2 to 4)                                         | 4 (3 to 6)                                         | 54.7% (48.6% to 60.1%)                                           |
| Albania     | Fire, heat, and hot substances                  | 0 (0 to 0)                                         | 0 (0 to 0)                                         | 1.6% (-3.8% to 6.6%)                                             |
| Albania     | Foreign body in eyes                            | 0 (0 to 0)                                         | 0 (0 to 0)                                         | 0% (0% to 0%)                                                    |



|    |         |                                                 |            |            |                           |
|----|---------|-------------------------------------------------|------------|------------|---------------------------|
| 1  |         |                                                 |            |            |                           |
| 2  | Albania | Foreign body in other body part                 | 0 (0 to 0) | 0 (0 to 0) | -0.7% (-5.3% to 3.3%)     |
| 3  | Albania | Motor vehicle road injuries                     | 1 (1 to 2) | 1 (1 to 2) | 6.6% (-1.7% to 15.3%)     |
| 4  | Albania | Motorcyclist road injuries                      | 0 (0 to 0) | 0 (0 to 0) | 46% (29.3% to 66.5%)      |
| 5  | Albania | Non-venomous animal contact                     | 0 (0 to 0) | 0 (0 to 0) | -19.3% (-22.8% to -14.8%) |
| 6  | Albania | Other exposure to mechanical forces             | 3 (1 to 6) | 2 (1 to 4) | -32.8% (-37.5% to -26.7%) |
| 7  | Albania | Other road injuries                             | 0 (0 to 0) | 0 (0 to 0) | 6% (-3.7% to 17.1%)       |
| 8  | Albania | Other transport injuries                        | 0 (0 to 0) | 0 (0 to 0) | -10.6% (-15.5% to -6.3%)  |
| 9  | Albania | Other unintentional injuries                    | 1 (0 to 1) | 0 (0 to 0) | -35.4% (-40.9% to -30.3%) |
| 10 | Albania | Pedestrian road injuries                        | 0 (0 to 1) | 0 (0 to 1) | -4.8% (-14% to 5.2%)      |
| 11 | Albania | Physical violence by firearm                    | 0 (0 to 0) | 0 (0 to 0) | -44% (-53.7% to -32.9%)   |
| 12 | Albania | Physical violence by other means                | 1 (0 to 1) | 0 (0 to 1) | -46.5% (-53.7% to -39.3%) |
| 13 | Albania | Physical violence by sharp object               | 0 (0 to 0) | 0 (0 to 0) | -63.1% (-70% to -55.8%)   |
| 14 | Albania | Poisoning by carbon monoxide                    | 0 (0 to 0) | 0 (0 to 0) | 44.8% (33.4% to 59.6%)    |
| 15 | Albania | Poisoning by other means                        | 0 (0 to 0) | 0 (0 to 0) | -1.3% (-7.7% to 5.5%)     |
| 16 | Albania | Pulmonary aspiration and foreign body in airway | 0 (0 to 0) | 0 (0 to 0) | -15.2% (-21.6% to -8.9%)  |
| 17 | Albania | Self-harm by firearm                            | 0 (0 to 0) | 0 (0 to 0) | 68.3% (52% to 86.2%)      |
| 18 | Albania | Self-harm by other specified means              | 0 (0 to 0) | 0 (0 to 0) | 58% (46.9% to 69.4%)      |
| 19 | Albania | Unintentional firearm injuries                  | 0 (0 to 0) | 0 (0 to 0) | -57.4% (-64% to -50.9%)   |
| 20 | Albania | Venomous animal contact                         | 0 (0 to 0) | 0 (0 to 0) | -20.8% (-25.7% to -14.9%) |
| 21 | Algeria | Adverse effects of medical treatment            | 0 (0 to 0) | 0 (0 to 0) | 0% (0% to 0%)             |
| 22 | Algeria | Conflict and terrorism                          | 0 (0 to 0) | 0 (0 to 0) | NA                        |
| 23 | Algeria | Cyclist road injuries                           | 0 (0 to 0) | 0 (0 to 0) | -5.3% (-13.6% to 5.2%)    |
| 24 | Algeria | Drowning                                        | 0 (0 to 0) | 0 (0 to 0) | 65.7% (38.9% to 93.2%)    |
| 25 | Algeria | Environmental heat and cold exposure            | 0 (0 to 0) | 0 (0 to 0) | 2.5% (-1.6% to 7.1%)      |
| 26 | Algeria | Executions and police conflict                  | 0 (0 to 0) | 0 (0 to 0) | NA                        |
| 27 | Algeria | Exposure to forces of nature                    | 0 (0 to 0) | 0 (0 to 0) | NA                        |
| 28 | Algeria | Falls                                           | 2 (1 to 2) | 2 (2 to 3) | 21.2% (16.7% to 25.8%)    |
| 29 | Algeria | Fire, heat, and hot substances                  | 0 (0 to 0) | 0 (0 to 0) | -35.2% (-39.9% to -30.4%) |
| 30 | Algeria | Foreign body in eyes                            | 0 (0 to 0) | 0 (0 to 0) | 0% (0% to 0%)             |
| 31 | Algeria | Foreign body in other body part                 | 0 (0 to 0) | 0 (0 to 0) | 0.4% (-3.4% to 4.2%)      |
| 32 | Algeria | Motor vehicle road injuries                     | 1 (1 to 2) | 1 (0 to 1) | -32.3% (-37% to -26.8%)   |
| 33 | Algeria | Motorcyclist road injuries                      | 0 (0 to 0) | 0 (0 to 0) | -37.6% (-44.8% to -29.4%) |
| 34 | Algeria | Non-venomous animal contact                     | 0 (0 to 0) | 0 (0 to 0) | 2.9% (-1.2% to 8.1%)      |
| 35 | Algeria | Other exposure to mechanical forces             | 0 (0 to 1) | 0 (0 to 0) | -17.2% (-23.7% to -11.2%) |
| 36 | Algeria | Other road injuries                             | 0 (0 to 0) | 0 (0 to 0) | 1.4% (-8.3% to 13.4%)     |
| 37 | Algeria | Other transport injuries                        | 0 (0 to 0) | 0 (0 to 0) | -3.4% (-7.8% to 1.7%)     |
| 38 | Algeria | Other unintentional injuries                    | 0 (0 to 0) | 0 (0 to 0) | -16.7% (-22% to -11.7%)   |
| 39 | Algeria | Pedestrian road injuries                        | 0 (0 to 1) | 0 (0 to 0) | -39% (-44.6% to -32.3%)   |
| 40 | Algeria | Physical violence by firearm                    | 0 (0 to 0) | 0 (0 to 0) | 89% (66.4% to 119.4%)     |
| 41 | Algeria | Physical violence by other means                | 0 (0 to 0) | 0 (0 to 0) | -20% (-27.1% to -12.6%)   |
| 42 | Algeria | Physical violence by sharp object               | 0 (0 to 0) | 0 (0 to 0) | -31.8% (-41% to -23.6%)   |
| 43 | Algeria | Poisoning by carbon monoxide                    | 0 (0 to 0) | 0 (0 to 0) | 20.7% (6.4% to 37.5%)     |
| 44 | Algeria | Poisoning by other means                        | 0 (0 to 0) | 0 (0 to 0) | -27.8% (-35.7% to -19.5%) |
| 45 |         |                                                 |            |            |                           |
| 46 |         |                                                 |            |            |                           |

|    |                |                                                 |             |             |                           |
|----|----------------|-------------------------------------------------|-------------|-------------|---------------------------|
| 1  |                |                                                 |             |             |                           |
| 2  | Algeria        | Pulmonary aspiration and foreign body in airway | 0 (0 to 0)  | 0 (0 to 0)  | -10.2% (-18.6% to -2.9%)  |
| 3  | Algeria        | Self-harm by firearm                            | 0 (0 to 0)  | 0 (0 to 0)  | 10.8% (-0.5% to 24.1%)    |
| 4  | Algeria        | Self-harm by other specified means              | 0 (0 to 0)  | 0 (0 to 0)  | -22.6% (-27.4% to -17.7%) |
| 5  | Algeria        | Unintentional firearm injuries                  | 0 (0 to 0)  | 0 (0 to 0)  | 1.1% (-6% to 10.2%)       |
| 6  | Algeria        | Venomous animal contact                         | 0 (0 to 0)  | 0 (0 to 0)  | 4.7% (-1.1% to 12.1%)     |
| 7  | American Samoa | Adverse effects of medical treatment            | 0 (0 to 0)  | 0 (0 to 0)  | 0% (0% to 0%)             |
| 8  | American Samoa | Conflict and terrorism                          | 0 (0 to 0)  | 0 (0 to 0)  | NA                        |
| 9  | American Samoa | Cyclist road injuries                           | 0 (0 to 1)  | 0 (0 to 1)  | 2.9% (-4.3% to 11.7%)     |
| 10 | American Samoa | Drowning                                        | 0 (0 to 0)  | 0 (0 to 0)  | 13% (1.9% to 25.3%)       |
| 11 | American Samoa | Environmental heat and cold exposure            | 0 (0 to 0)  | 0 (0 to 0)  | -19.9% (-24.9% to -14.9%) |
| 12 | American Samoa | Executions and police conflict                  | 0 (0 to 0)  | 0 (0 to 0)  | NA                        |
| 13 | American Samoa | Exposure to forces of nature                    | 0 (0 to 0)  | 0 (0 to 0)  | NA                        |
| 14 | American Samoa | Falls                                           | 4 (3 to 6)  | 5 (4 to 8)  | 33.6% (28.3% to 39%)      |
| 15 | American Samoa | Fire, heat, and hot substances                  | 0 (0 to 0)  | 0 (0 to 0)  | 9.4% (3.9% to 15.3%)      |
| 16 | American Samoa | Foreign body in eyes                            | 0 (0 to 0)  | 0 (0 to 0)  | 0% (0% to 0%)             |
| 17 | American Samoa | Foreign body in other body part                 | 0 (0 to 0)  | 0 (0 to 0)  | -2.1% (-5.4% to 1%)       |
| 18 | American Samoa | Motor vehicle road injuries                     | 1 (0 to 2)  | 1 (0 to 1)  | -29.3% (-35.5% to -23.5%) |
| 19 | American Samoa | Motorcyclist road injuries                      | 1 (0 to 1)  | 1 (0 to 1)  | -6.8% (-14.5% to 2.4%)    |
| 20 | American Samoa | Non-venomous animal contact                     | 0 (0 to 0)  | 0 (0 to 0)  | 1.9% (-2.7% to 7%)        |
| 21 | American Samoa | Other exposure to mechanical forces             | 0 (0 to 1)  | 0 (0 to 0)  | -30.2% (-35.7% to -25.5%) |
| 22 | American Samoa | Other road injuries                             | 0 (0 to 0)  | 0 (0 to 0)  | -6.5% (-15.6% to 3.8%)    |
| 23 | American Samoa | Other transport injuries                        | 0 (0 to 1)  | 0 (0 to 1)  | -29.3% (-34.9% to -24.5%) |
| 24 | American Samoa | Other unintentional injuries                    | 0 (0 to 1)  | 0 (0 to 0)  | -17.2% (-21.8% to -12.6%) |
| 25 | American Samoa | Pedestrian road injuries                        | 1 (0 to 1)  | 0 (0 to 1)  | -15.9% (-23.1% to -8.3%)  |
| 26 | American Samoa | Physical violence by firearm                    | 0 (0 to 0)  | 0 (0 to 0)  | -26.5% (-40.6% to -11.2%) |
| 27 | American Samoa | Physical violence by other means                | 1 (0 to 2)  | 1 (0 to 1)  | -11.6% (-17.3% to -5.7%)  |
| 28 | American Samoa | Physical violence by sharp object               | 0 (0 to 0)  | 0 (0 to 0)  | -38.7% (-47.5% to -30.2%) |
| 29 | American Samoa | Poisoning by carbon monoxide                    | 0 (0 to 0)  | 0 (0 to 0)  | 5.8% (-3.4% to 16.2%)     |
| 30 | American Samoa | Poisoning by other means                        | 0 (0 to 0)  | 0 (0 to 0)  | -10.7% (-16.6% to -3.4%)  |
| 31 | American Samoa | Pulmonary aspiration and foreign body in airway | 0 (0 to 0)  | 0 (0 to 0)  | 17.5% (4.8% to 30.6%)     |
| 32 | American Samoa | Self-harm by firearm                            | 0 (0 to 0)  | 0 (0 to 0)  | -9.8% (-25.5% to 4%)      |
| 33 | American Samoa | Self-harm by other specified means              | 0 (0 to 0)  | 0 (0 to 0)  | 20.2% (12.6% to 30.2%)    |
| 34 | American Samoa | Unintentional firearm injuries                  | 0 (0 to 0)  | 0 (0 to 0)  | -39.1% (-48.7% to -30.9%) |
| 35 | American Samoa | Venomous animal contact                         | 0 (0 to 0)  | 0 (0 to 0)  | -7.4% (-15% to -0.1%)     |
| 36 | Andorra        | Adverse effects of medical treatment            | 0 (0 to 0)  | 0 (0 to 0)  | 0% (0% to 0%)             |
| 37 | Andorra        | Conflict and terrorism                          | 0 (0 to 0)  | 0 (0 to 0)  | NA                        |
| 38 | Andorra        | Cyclist road injuries                           | 0 (0 to 1)  | 0 (0 to 0)  | -14.1% (-20.9% to -6.3%)  |
| 39 | Andorra        | Drowning                                        | 0 (0 to 0)  | 0 (0 to 0)  | 65.1% (47.8% to 81.5%)    |
| 40 | Andorra        | Environmental heat and cold exposure            | 0 (0 to 0)  | 0 (0 to 0)  | 1.2% (-2.3% to 5.2%)      |
| 41 | Andorra        | Executions and police conflict                  | 0 (0 to 0)  | 0 (0 to 0)  | NA                        |
| 42 | Andorra        | Exposure to forces of nature                    | 0 (0 to 0)  | 0 (0 to 0)  | NA                        |
| 43 | Andorra        | Falls                                           | 7 (5 to 10) | 8 (6 to 11) | 8.1% (3.1% to 13%)        |
| 44 | Andorra        | Fire, heat, and hot substances                  | 0 (0 to 0)  | 0 (0 to 0)  | 0.6% (-3.8% to 4.8%)      |
| 45 |                |                                                 |             |             |                           |
| 46 |                |                                                 |             |             |                           |

|    |         |                                                 |              |            |                           |
|----|---------|-------------------------------------------------|--------------|------------|---------------------------|
| 1  |         |                                                 |              |            |                           |
| 2  | Andorra | Foreign body in eyes                            | 0 (0 to 0)   | 0 (0 to 0) | 0% (0% to 0%)             |
| 3  | Andorra | Foreign body in other body part                 | 0 (0 to 0)   | 0 (0 to 0) | -0.4% (-4.1% to 3.6%)     |
| 4  | Andorra | Motor vehicle road injuries                     | 1 (0 to 1)   | 0 (0 to 1) | -22.6% (-28.8% to -16.2%) |
| 5  | Andorra | Motorcyclist road injuries                      | 0 (0 to 0)   | 0 (0 to 0) | -6.5% (-16.3% to 4.1%)    |
| 6  | Andorra | Non-venomous animal contact                     | 0 (0 to 0)   | 0 (0 to 0) | -6.1% (-9.9% to -2.7%)    |
| 7  | Andorra | Other exposure to mechanical forces             | 0 (0 to 1)   | 0 (0 to 1) | 1.9% (-3% to 6.9%)        |
| 8  | Andorra | Other road injuries                             | 0 (0 to 0)   | 0 (0 to 0) | -9.1% (-17.1% to 0.2%)    |
| 9  | Andorra | Other transport injuries                        | 0 (0 to 0)   | 0 (0 to 0) | 1.1% (-2.9% to 5%)        |
| 10 | Andorra | Other unintentional injuries                    | 0 (0 to 0)   | 0 (0 to 0) | -2.2% (-5.7% to 1.3%)     |
| 11 | Andorra | Pedestrian road injuries                        | 0 (0 to 0)   | 0 (0 to 0) | -22.8% (-31.3% to -13.8%) |
| 12 | Andorra | Physical violence by firearm                    | 0 (0 to 0)   | 0 (0 to 0) | 26% (14.7% to 39.6%)      |
| 13 | Andorra | Physical violence by other means                | 0 (0 to 0)   | 0 (0 to 0) | -8.8% (-16.2% to -2%)     |
| 14 | Andorra | Physical violence by sharp object               | 0 (0 to 0)   | 0 (0 to 0) | -13.1% (-22.5% to -4.3%)  |
| 15 | Andorra | Poisoning by carbon monoxide                    | 0 (0 to 0)   | 0 (0 to 0) | 12.5% (5.4% to 20.2%)     |
| 16 | Andorra | Poisoning by other means                        | 0 (0 to 0)   | 0 (0 to 0) | -4.3% (-9.6% to 1.2%)     |
| 17 | Andorra | Pulmonary aspiration and foreign body in airway | 0 (0 to 0)   | 0 (0 to 0) | -10.6% (-18.3% to -3.1%)  |
| 18 | Andorra | Self-harm by firearm                            | 0 (0 to 0)   | 0 (0 to 0) | -8.2% (-17.6% to 1.3%)    |
| 19 | Andorra | Self-harm by other specified means              | 0 (0 to 0)   | 0 (0 to 0) | -15% (-18.9% to -11.4%)   |
| 20 | Andorra | Unintentional firearm injuries                  | 0 (0 to 0)   | 0 (0 to 0) | 6% (-1.3% to 13.3%)       |
| 21 | Andorra | Venomous animal contact                         | 0 (0 to 0)   | 0 (0 to 0) | -8.2% (-13.9% to -2.8%)   |
| 22 | Angola  | Adverse effects of medical treatment            | 0 (0 to 0)   | 0 (0 to 0) | 0% (0% to 0%)             |
| 23 | Angola  | Conflict and terrorism                          | 14 (3 to 42) | 0 (0 to 0) | NA                        |
| 24 | Angola  | Cyclist road injuries                           | 0 (0 to 0)   | 0 (0 to 0) | 27.2% (16.2% to 37.8%)    |
| 25 | Angola  | Drowning                                        | 0 (0 to 0)   | 0 (0 to 0) | -27.9% (-35.8% to -20.3%) |
| 26 | Angola  | Environmental heat and cold exposure            | 0 (0 to 0)   | 0 (0 to 0) | -10.6% (-18% to -3.9%)    |
| 27 | Angola  | Executions and police conflict                  | 0 (0 to 0)   | 0 (0 to 0) | NA                        |
| 28 | Angola  | Exposure to forces of nature                    | 0 (0 to 0)   | 0 (0 to 0) | NA                        |
| 29 | Angola  | Falls                                           | 1 (1 to 1)   | 1 (1 to 2) | 27.2% (22.7% to 31.5%)    |
| 30 | Angola  | Fire, heat, and hot substances                  | 0 (0 to 0)   | 0 (0 to 0) | -19.9% (-25.9% to -14.8%) |
| 31 | Angola  | Foreign body in eyes                            | 0 (0 to 0)   | 0 (0 to 0) | 0% (0% to 0%)             |
| 32 | Angola  | Foreign body in other body part                 | 0 (0 to 1)   | 0 (0 to 1) | -12.1% (-16% to -8.2%)    |
| 33 | Angola  | Motor vehicle road injuries                     | 1 (0 to 1)   | 1 (0 to 1) | 5.8% (-1.7% to 14.1%)     |
| 34 | Angola  | Motorcyclist road injuries                      | 0 (0 to 0)   | 0 (0 to 0) | 3.6% (-8.2% to 15.2%)     |
| 35 | Angola  | Non-venomous animal contact                     | 0 (0 to 0)   | 0 (0 to 0) | -33.6% (-38% to -29.3%)   |
| 36 | Angola  | Other exposure to mechanical forces             | 0 (0 to 0)   | 0 (0 to 0) | -17.4% (-24.1% to -10.9%) |
| 37 | Angola  | Other road injuries                             | 0 (0 to 0)   | 0 (0 to 0) | 18.9% (7.4% to 31.6%)     |
| 38 | Angola  | Other transport injuries                        | 0 (0 to 0)   | 0 (0 to 0) | -20.1% (-25.4% to -15.4%) |
| 39 | Angola  | Other unintentional injuries                    | 0 (0 to 0)   | 0 (0 to 0) | -21.9% (-27.1% to -15.9%) |
| 40 | Angola  | Pedestrian road injuries                        | 1 (0 to 1)   | 0 (0 to 1) | -16.9% (-23.8% to -10.8%) |
| 41 | Angola  | Physical violence by firearm                    | 0 (0 to 0)   | 0 (0 to 0) | 20.7% (8.8% to 35.2%)     |
| 42 | Angola  | Physical violence by other means                | 0 (0 to 0)   | 0 (0 to 0) | -8.2% (-15% to -1.5%)     |
| 43 | Angola  | Physical violence by sharp object               | 0 (0 to 0)   | 0 (0 to 0) | -10.2% (-16.8% to -3.7%)  |
| 44 | Angola  | Poisoning by carbon monoxide                    | 0 (0 to 0)   | 0 (0 to 0) | 5.6% (-6.5% to 20.3%)     |
| 45 |         |                                                 |              |            |                           |
| 46 |         |                                                 |              |            |                           |

|    |                     |                                                 |            |            |                           |
|----|---------------------|-------------------------------------------------|------------|------------|---------------------------|
| 1  |                     |                                                 |            |            |                           |
| 2  | Angola              | Poisoning by other means                        | 0 (0 to 0) | 0 (0 to 0) | -33.3% (-39.8% to -25.5%) |
| 3  | Angola              | Pulmonary aspiration and foreign body in airway | 0 (0 to 0) | 0 (0 to 0) | -37.4% (-45.3% to -28.8%) |
| 4  | Angola              | Self-harm by firearm                            | 0 (0 to 0) | 0 (0 to 0) | 28.4% (12.9% to 46.5%)    |
| 5  | Angola              | Self-harm by other specified means              | 0 (0 to 0) | 0 (0 to 0) | -5.6% (-10.9% to -0.5%)   |
| 6  | Angola              | Unintentional firearm injuries                  | 0 (0 to 0) | 0 (0 to 0) | -25% (-32.1% to -17.9%)   |
| 7  | Angola              | Venomous animal contact                         | 0 (0 to 0) | 0 (0 to 0) | -22.6% (-31.1% to -12.4%) |
| 8  | Antigua and Barbuda | Adverse effects of medical treatment            | 0 (0 to 0) | 0 (0 to 0) | 0% (0% to 0%)             |
| 9  | Antigua and Barbuda | Conflict and terrorism                          | 0 (0 to 0) | 0 (0 to 0) | NA                        |
| 10 | Antigua and Barbuda | Cyclist road injuries                           | 0 (0 to 0) | 0 (0 to 0) | -7.9% (-16.7% to 1.8%)    |
| 11 | Antigua and Barbuda | Drowning                                        | 0 (0 to 0) | 0 (0 to 0) | 24.7% (12% to 37.7%)      |
| 12 | Antigua and Barbuda | Environmental heat and cold exposure            | 0 (0 to 1) | 0 (0 to 1) | 8.9% (4.2% to 13%)        |
| 13 | Antigua and Barbuda | Executions and police conflict                  | 0 (0 to 0) | 0 (0 to 0) | NA                        |
| 14 | Antigua and Barbuda | Exposure to forces of nature                    | 0 (0 to 0) | 0 (0 to 0) | NA                        |
| 15 | Antigua and Barbuda | Falls                                           | 1 (1 to 1) | 1 (1 to 2) | 52.3% (46.3% to 58.1%)    |
| 16 | Antigua and Barbuda | Fire, heat, and hot substances                  | 0 (0 to 0) | 0 (0 to 0) | -18.8% (-23.8% to -13.9%) |
| 17 | Antigua and Barbuda | Foreign body in eyes                            | 0 (0 to 0) | 0 (0 to 0) | 0% (0% to 0%)             |
| 18 | Antigua and Barbuda | Foreign body in other body part                 | 0 (0 to 0) | 0 (0 to 0) | 3% (-1.5% to 7.6%)        |
| 19 | Antigua and Barbuda | Motor vehicle road injuries                     | 0 (0 to 1) | 0 (0 to 1) | -24.9% (-31.8% to -17.3%) |
| 20 | Antigua and Barbuda | Motorcyclist road injuries                      | 0 (0 to 0) | 0 (0 to 0) | 6.8% (-5.5% to 22.3%)     |
| 21 | Antigua and Barbuda | Non-venomous animal contact                     | 0 (0 to 0) | 0 (0 to 0) | 12.5% (3.8% to 23.2%)     |
| 22 | Antigua and Barbuda | Other exposure to mechanical forces             | 1 (0 to 1) | 1 (0 to 1) | 10.5% (1.1% to 19.5%)     |
| 23 | Antigua and Barbuda | Other road injuries                             | 0 (0 to 0) | 0 (0 to 0) | -3% (-12.5% to 7.8%)      |
| 24 | Antigua and Barbuda | Other transport injuries                        | 0 (0 to 0) | 0 (0 to 0) | 7.7% (3.2% to 13.1%)      |
| 25 | Antigua and Barbuda | Other unintentional injuries                    | 0 (0 to 0) | 0 (0 to 0) | -14% (-18.9% to -9.7%)    |
| 26 | Antigua and Barbuda | Pedestrian road injuries                        | 0 (0 to 0) | 0 (0 to 0) | -12.2% (-20.9% to -3%)    |
| 27 | Antigua and Barbuda | Physical violence by firearm                    | 0 (0 to 0) | 0 (0 to 0) | 63.1% (41.5% to 93.3%)    |
| 28 | Antigua and Barbuda | Physical violence by other means                | 0 (0 to 0) | 0 (0 to 0) | -4.8% (-14.1% to 4.1%)    |
| 29 | Antigua and Barbuda | Physical violence by sharp object               | 0 (0 to 0) | 0 (0 to 0) | 0.2% (-10.2% to 11.9%)    |
| 30 | Antigua and Barbuda | Poisoning by carbon monoxide                    | 0 (0 to 0) | 0 (0 to 0) | 10.7% (-2.6% to 25.4%)    |
| 31 | Antigua and Barbuda | Poisoning by other means                        | 0 (0 to 0) | 0 (0 to 0) | -20.2% (-29.7% to -11%)   |
| 32 | Antigua and Barbuda | Pulmonary aspiration and foreign body in airway | 0 (0 to 0) | 0 (0 to 0) | -18.9% (-25.1% to -11.8%) |
| 33 | Antigua and Barbuda | Self-harm by firearm                            | 0 (0 to 0) | 0 (0 to 0) | 29.9% (17.8% to 45.5%)    |
| 34 | Antigua and Barbuda | Self-harm by other specified means              | 0 (0 to 0) | 0 (0 to 0) | 20.7% (12.3% to 29.9%)    |
| 35 | Antigua and Barbuda | Unintentional firearm injuries                  | 0 (0 to 1) | 1 (0 to 1) | 13.4% (3.3% to 25.5%)     |
| 36 | Antigua and Barbuda | Venomous animal contact                         | 0 (0 to 0) | 0 (0 to 0) | 10.4% (1.7% to 20.9%)     |
| 37 | Argentina           | Venomous animal contact                         | 0 (0 to 0) | 0 (0 to 0) | 0% (0% to 0%)             |
| 38 | Argentina           | Adverse effects of medical treatment            | 0 (0 to 0) | 0 (0 to 0) | 0% (0% to 0%)             |
| 39 | Argentina           | Conflict and terrorism                          | 0 (0 to 1) | 0 (0 to 0) | NA                        |
| 40 | Argentina           | Cyclist road injuries                           | 0 (0 to 0) | 0 (0 to 0) | -3.7% (-13.9% to 8.2%)    |
| 41 | Argentina           | Drowning                                        | 0 (0 to 0) | 0 (0 to 0) | 32.9% (16.3% to 49.7%)    |
| 42 | Argentina           | Environmental heat and cold exposure            | 0 (0 to 0) | 0 (0 to 0) | 1.2% (-4% to 7%)          |
| 43 | Argentina           | Executions and police conflict                  | 0 (0 to 0) | 0 (0 to 0) | NA                        |
| 44 | Argentina           | Exposure to forces of nature                    | 0 (0 to 0) | 0 (0 to 0) | NA                        |
| 45 | Argentina           | Falls                                           | 3 (2 to 4) | 3 (2 to 4) | 1.7% (-3.4% to 6.4%)      |
| 46 |                     |                                                 |            |            |                           |

|    |           |                                                 |            |            |                           |
|----|-----------|-------------------------------------------------|------------|------------|---------------------------|
| 1  |           |                                                 |            |            |                           |
| 2  | Argentina | Fire, heat, and hot substances                  | 0 (0 to 0) | 0 (0 to 0) | -2.4% (-8% to 3.3%)       |
| 3  | Argentina | Foreign body in eyes                            | 0 (0 to 0) | 0 (0 to 0) | 0% (0% to 0%)             |
| 4  | Argentina | Foreign body in other body part                 | 0 (0 to 1) | 0 (0 to 0) | -6.4% (-10.4% to -3.4%)   |
| 5  | Argentina | Motor vehicle road injuries                     | 1 (0 to 1) | 1 (0 to 1) | 15.5% (5.1% to 29.5%)     |
| 6  | Argentina | Motorcyclist road injuries                      | 0 (0 to 0) | 0 (0 to 0) | 97.6% (67.3% to 142.2%)   |
| 7  | Argentina | Non-venomous animal contact                     | 0 (0 to 0) | 0 (0 to 0) | -18.2% (-21.1% to -15%)   |
| 8  | Argentina | Other exposure to mechanical forces             | 1 (0 to 1) | 1 (0 to 2) | 9.2% (0.4% to 20.8%)      |
| 9  | Argentina | Other road injuries                             | 0 (0 to 0) | 0 (0 to 0) | -2.7% (-12.2% to 8.4%)    |
| 10 | Argentina | Other transport injuries                        | 0 (0 to 0) | 0 (0 to 0) | -27.9% (-33.3% to -22.4%) |
| 11 | Argentina | Other unintentional injuries                    | 0 (0 to 1) | 0 (0 to 1) | -12.1% (-17% to -6.2%)    |
| 12 | Argentina | Pedestrian road injuries                        | 0 (0 to 0) | 0 (0 to 0) | -16.5% (-26.1% to -7.1%)  |
| 13 | Argentina | Physical violence by firearm                    | 0 (0 to 0) | 0 (0 to 0) | 64.3% (43.3% to 91%)      |
| 14 | Argentina | Physical violence by other means                | 0 (0 to 1) | 0 (0 to 1) | 1.4% (-10.2% to 14.4%)    |
| 15 | Argentina | Physical violence by sharp object               | 0 (0 to 0) | 0 (0 to 0) | 8.6% (-6.5% to 26.1%)     |
| 16 | Argentina | Poisoning by carbon monoxide                    | 0 (0 to 0) | 0 (0 to 0) | 49.1% (34.9% to 64.9%)    |
| 17 | Argentina | Poisoning by other means                        | 0 (0 to 0) | 0 (0 to 0) | -5.5% (-12.8% to 2.7%)    |
| 18 | Argentina | Pulmonary aspiration and foreign body in airway | 0 (0 to 0) | 0 (0 to 0) | -41.3% (-48.4% to -34.3%) |
| 19 | Argentina | Self-harm by firearm                            | 0 (0 to 0) | 0 (0 to 0) | 2.5% (-12.1% to 18.1%)    |
| 20 | Argentina | Self-harm by other specified means              | 0 (0 to 0) | 0 (0 to 0) | 55.8% (44.7% to 68.4%)    |
| 21 | Argentina | Unintentional firearm injuries                  | 0 (0 to 1) | 0 (0 to 1) | -32.4% (-42.2% to -23.1%) |
| 22 | Argentina | Venomous animal contact                         | 0 (0 to 0) | 0 (0 to 0) | -17.9% (-22.4% to -13.1%) |
| 23 | Armenia   | Adverse effects of medical treatment            | 0 (0 to 0) | 0 (0 to 0) | 0% (0% to 0%)             |
| 24 | Armenia   | Conflict and terrorism                          | 0 (0 to 1) | 0 (0 to 0) | NA                        |
| 25 | Armenia   | Cyclist road injuries                           | 0 (0 to 0) | 0 (0 to 0) | -16.8% (-24.9% to -7.4%)  |
| 26 | Armenia   | Drowning                                        | 0 (0 to 0) | 0 (0 to 0) | 13.9% (-2.4% to 30.2%)    |
| 27 | Armenia   | Environmental heat and cold exposure            | 0 (0 to 0) | 0 (0 to 0) | 1.5% (-7% to 12.4%)       |
| 28 | Armenia   | Executions and police conflict                  | 0 (0 to 0) | 0 (0 to 0) | NA                        |
| 29 | Armenia   | Exposure to forces of nature                    | 0 (0 to 0) | 0 (0 to 0) | NA                        |
| 30 | Armenia   | Falls                                           | 4 (3 to 5) | 3 (2 to 3) | -33.9% (-39.3% to -27.9%) |
| 31 | Armenia   | Fire, heat, and hot substances                  | 0 (0 to 0) | 0 (0 to 0) | -37.5% (-46% to -28.9%)   |
| 32 | Armenia   | Foreign body in eyes                            | 0 (0 to 0) | 0 (0 to 0) | 0% (0% to 0%)             |
| 33 | Armenia   | Foreign body in other body part                 | 0 (0 to 1) | 0 (0 to 1) | -10% (-14.5% to -5.3%)    |
| 34 | Armenia   | Motor vehicle road injuries                     | 1 (0 to 2) | 1 (0 to 1) | -18.3% (-26.6% to -9.1%)  |
| 35 | Armenia   | Motorcyclist road injuries                      | 0 (0 to 0) | 0 (0 to 0) | -42.4% (-52.5% to -31.6%) |
| 36 | Armenia   | Non-venomous animal contact                     | 0 (0 to 0) | 0 (0 to 0) | -4.9% (-9.8% to 0.6%)     |
| 37 | Armenia   | Other exposure to mechanical forces             | 1 (0 to 2) | 1 (0 to 1) | -25.2% (-33.1% to -17.1%) |
| 38 | Armenia   | Other road injuries                             | 0 (0 to 0) | 0 (0 to 0) | -21.5% (-30.8% to -10.9%) |
| 39 | Armenia   | Other transport injuries                        | 0 (0 to 0) | 0 (0 to 0) | 9.3% (5.4% to 13.9%)      |
| 40 | Armenia   | Other unintentional injuries                    | 0 (0 to 1) | 0 (0 to 0) | -29.7% (-35.6% to -22.8%) |
| 41 | Armenia   | Pedestrian road injuries                        | 0 (0 to 1) | 0 (0 to 0) | -32.8% (-40% to -24.5%)   |
| 42 | Armenia   | Physical violence by firearm                    | 0 (0 to 0) | 0 (0 to 0) | 40.2% (20.5% to 63.6%)    |
| 43 | Armenia   | Physical violence by other means                | 0 (0 to 1) | 0 (0 to 0) | -17.6% (-27% to -7%)      |
| 44 | Armenia   | Physical violence by sharp object               | 0 (0 to 0) | 0 (0 to 0) | -19.7% (-31.9% to -6.8%)  |
| 45 |           |                                                 |            |            |                           |
| 46 |           |                                                 |            |            |                           |

|    |           |                                                 |            |             |                           |
|----|-----------|-------------------------------------------------|------------|-------------|---------------------------|
| 1  |           |                                                 |            |             |                           |
| 2  | Armenia   | Poisoning by carbon monoxide                    | 0 (0 to 0) | 0 (0 to 0)  | -8.2% (-21.7% to 5.6%)    |
| 3  | Armenia   | Poisoning by other means                        | 0 (0 to 0) | 0 (0 to 0)  | -14.4% (-24.1% to -5.5%)  |
| 4  | Armenia   | Pulmonary aspiration and foreign body in airway | 0 (0 to 0) | 0 (0 to 0)  | -30.5% (-37.9% to -24.3%) |
| 5  | Armenia   | Self-harm by firearm                            | 0 (0 to 0) | 0 (0 to 0)  | 131.5% (96.6% to 171.8%)  |
| 6  | Armenia   | Self-harm by other specified means              | 0 (0 to 0) | 0 (0 to 0)  | 84.1% (71.1% to 99.8%)    |
| 7  | Armenia   | Unintentional firearm injuries                  | 0 (0 to 0) | 0 (0 to 0)  | -46.4% (-55.6% to -37.7%) |
| 8  | Armenia   | Venomous animal contact                         | 0 (0 to 0) | 0 (0 to 0)  | -17.8% (-24.1% to -13.1%) |
| 9  | Australia | Adverse effects of medical treatment            | 0 (0 to 0) | 0 (0 to 0)  | 0% (0% to 0%)             |
| 10 | Australia | Conflict and terrorism                          | 0 (0 to 0) | 0 (0 to 0)  | NA                        |
| 11 | Australia | Cyclist road injuries                           | 0 (0 to 0) | 0 (0 to 0)  | -15% (-26% to -2.3%)      |
| 12 | Australia | Drowning                                        | 0 (0 to 0) | 0 (0 to 0)  | 36.3% (23.6% to 50.6%)    |
| 13 | Australia | Environmental heat and cold exposure            | 0 (0 to 0) | 0 (0 to 0)  | -18.2% (-24.3% to -12.6%) |
| 14 | Australia | Executions and police conflict                  | 0 (0 to 0) | 0 (0 to 0)  | NA                        |
| 15 | Australia | Exposure to forces of nature                    | 0 (0 to 0) | 0 (0 to 0)  | NA                        |
| 16 | Australia | Falls                                           | 6 (4 to 8) | 8 (6 to 11) | 33.2% (27.2% to 39.8%)    |
| 17 | Australia | Fire, heat, and hot substances                  | 0 (0 to 0) | 0 (0 to 0)  | -6.7% (-11.9% to -1%)     |
| 18 | Australia | Foreign body in eyes                            | 0 (0 to 0) | 0 (0 to 0)  | 0% (0% to 0%)             |
| 19 | Australia | Foreign body in other body part                 | 1 (0 to 1) | 1 (0 to 1)  | 1.6% (-2.5% to 5.7%)      |
| 20 | Australia | Motor vehicle road injuries                     | 1 (0 to 1) | 0 (0 to 1)  | -36.5% (-43.4% to -28.9%) |
| 21 | Australia | Motorcyclist road injuries                      | 0 (0 to 0) | 0 (0 to 0)  | -15% (-31.9% to 2.3%)     |
| 22 | Australia | Non-venomous animal contact                     | 0 (0 to 1) | 0 (0 to 1)  | -13% (-16.2% to -9.5%)    |
| 23 | Australia | Other exposure to mechanical forces             | 2 (1 to 4) | 2 (1 to 4)  | -7.7% (-14.9% to -1.9%)   |
| 24 | Australia | Other road injuries                             | 0 (0 to 0) | 0 (0 to 0)  | -3.4% (-15.4% to 11.2%)   |
| 25 | Australia | Other transport injuries                        | 0 (0 to 0) | 0 (0 to 0)  | -13.2% (-18.8% to -7.9%)  |
| 26 | Australia | Other unintentional injuries                    | 1 (0 to 1) | 1 (0 to 1)  | -11.6% (-16.8% to -7%)    |
| 27 | Australia | Pedestrian road injuries                        | 0 (0 to 0) | 0 (0 to 0)  | -34.8% (-44.7% to -23.9%) |
| 28 | Australia | Physical violence by firearm                    | 0 (0 to 0) | 0 (0 to 0)  | 24.1% (13% to 37.6%)      |
| 29 | Australia | Physical violence by other means                | 1 (0 to 1) | 1 (0 to 1)  | -6.3% (-13.4% to 0.9%)    |
| 30 | Australia | Physical violence by sharp object               | 0 (0 to 0) | 0 (0 to 0)  | -18.9% (-28.1% to -9.9%)  |
| 31 | Australia | Poisoning by carbon monoxide                    | 0 (0 to 0) | 0 (0 to 0)  | 9.4% (1.5% to 17.4%)      |
| 32 | Australia | Poisoning by other means                        | 0 (0 to 0) | 0 (0 to 0)  | -1.8% (-8.5% to 4.4%)     |
| 33 | Australia | Pulmonary aspiration and foreign body in airway | 0 (0 to 0) | 0 (0 to 0)  | -8.2% (-12.5% to -3.5%)   |
| 34 | Australia | Self-harm by firearm                            | 0 (0 to 0) | 0 (0 to 0)  | -43.8% (-57.2% to -32.3%) |
| 35 | Australia | Self-harm by other specified means              | 0 (0 to 1) | 0 (0 to 1)  | 1.7% (-4% to 7.7%)        |
| 36 | Australia | Unintentional firearm injuries                  | 0 (0 to 0) | 0 (0 to 0)  | -8.9% (-19.6% to 1.9%)    |
| 37 | Australia | Venomous animal contact                         | 0 (0 to 0) | 0 (0 to 0)  | -15.8% (-20.9% to -10.9%) |
| 38 | Austria   | Adverse effects of medical treatment            | 0 (0 to 0) | 0 (0 to 0)  | 0% (0% to 0%)             |
| 39 | Austria   | Conflict and terrorism                          | 0 (0 to 0) | 0 (0 to 0)  | NA                        |
| 40 | Austria   | Cyclist road injuries                           | 0 (0 to 0) | 0 (0 to 0)  | -27.5% (-36.4% to -16.7%) |
| 41 | Austria   | Drowning                                        | 0 (0 to 0) | 0 (0 to 0)  | 39.9% (24.2% to 55.1%)    |
| 42 | Austria   | Environmental heat and cold exposure            | 0 (0 to 0) | 0 (0 to 0)  | 4.2% (-0.9% to 9.7%)      |
| 43 | Austria   | Executions and police conflict                  | 0 (0 to 0) | 0 (0 to 0)  | NA                        |
| 44 | Austria   | Exposure to forces of nature                    | 0 (0 to 0) | 0 (0 to 0)  | NA                        |
| 45 |           |                                                 |            |             |                           |
| 46 |           |                                                 |            |             |                           |

|    |            |                                                 |             |            |                           |
|----|------------|-------------------------------------------------|-------------|------------|---------------------------|
| 1  |            |                                                 |             |            |                           |
| 2  | Austria    | Falls                                           | 7 (5 to 10) | 7 (5 to 9) | -3.3% (-7.9% to 1.3%)     |
| 3  | Austria    | Fire, heat, and hot substances                  | 0 (0 to 0)  | 0 (0 to 0) | -6% (-11.2% to -0.5%)     |
| 4  | Austria    | Foreign body in eyes                            | 0 (0 to 0)  | 0 (0 to 0) | 0% (0% to 0%)             |
| 5  | Austria    | Foreign body in other body part                 | 0 (0 to 0)  | 0 (0 to 0) | 2.3% (-1.1% to 5.6%)      |
| 6  | Austria    | Motor vehicle road injuries                     | 1 (0 to 1)  | 0 (0 to 1) | -54.7% (-61.5% to -47.6%) |
| 7  | Austria    | Motorcyclist road injuries                      | 0 (0 to 0)  | 0 (0 to 0) | -28.7% (-41.5% to -13.2%) |
| 8  | Austria    | Non-venomous animal contact                     | 0 (0 to 0)  | 0 (0 to 0) | -12.8% (-16.7% to -8.3%)  |
| 9  | Austria    | Other exposure to mechanical forces             | 1 (0 to 1)  | 1 (0 to 1) | -33.3% (-40.7% to -26.4%) |
| 10 | Austria    | Other road injuries                             | 0 (0 to 0)  | 0 (0 to 0) | -14.4% (-26.2% to -0.5%)  |
| 11 | Austria    | Other transport injuries                        | 0 (0 to 0)  | 0 (0 to 0) | -6.3% (-11.4% to -1%)     |
| 12 | Austria    | Other unintentional injuries                    | 0 (0 to 0)  | 0 (0 to 0) | -4.3% (-9.2% to 0%)       |
| 13 | Austria    | Pedestrian road injuries                        | 0 (0 to 0)  | 0 (0 to 0) | -49.2% (-58.2% to -39.3%) |
| 14 | Austria    | Physical violence by firearm                    | 0 (0 to 0)  | 0 (0 to 0) | 33% (22.2% to 47.3%)      |
| 15 | Austria    | Physical violence by other means                | 0 (0 to 0)  | 0 (0 to 0) | 0.5% (-7.2% to 8.1%)      |
| 16 | Austria    | Physical violence by sharp object               | 0 (0 to 0)  | 0 (0 to 0) | -19.1% (-27.7% to -11.2%) |
| 17 | Austria    | Poisoning by carbon monoxide                    | 0 (0 to 0)  | 0 (0 to 0) | 13.3% (5.8% to 21.9%)     |
| 18 | Austria    | Poisoning by other means                        | 0 (0 to 0)  | 0 (0 to 0) | -3.6% (-9% to 2.6%)       |
| 19 | Austria    | Pulmonary aspiration and foreign body in airway | 0 (0 to 0)  | 0 (0 to 0) | -6.8% (-14.3% to 1.4%)    |
| 20 | Austria    | Self-harm by firearm                            | 0 (0 to 0)  | 0 (0 to 0) | -28.6% (-38.5% to -16.9%) |
| 21 | Austria    | Self-harm by other specified means              | 0 (0 to 1)  | 0 (0 to 1) | -34.8% (-38.2% to -31%)   |
| 22 | Austria    | Unintentional firearm injuries                  | 0 (0 to 0)  | 0 (0 to 0) | 3.7% (-6.5% to 15.4%)     |
| 23 | Austria    | Venomous animal contact                         | 0 (0 to 0)  | 0 (0 to 0) | -11.5% (-16.9% to -4.6%)  |
| 24 | Azerbaijan | Adverse effects of medical treatment            | 0 (0 to 0)  | 0 (0 to 0) | 0% (0% to 0%)             |
| 25 | Azerbaijan | Conflict and terrorism                          | 0 (0 to 1)  | 0 (0 to 0) | NA                        |
| 26 | Azerbaijan | Cyclist road injuries                           | 0 (0 to 0)  | 0 (0 to 0) | -6.9% (-16.6% to 3.8%)    |
| 27 | Azerbaijan | Drowning                                        | 0 (0 to 0)  | 0 (0 to 0) | 30% (13.7% to 47.3%)      |
| 28 | Azerbaijan | Environmental heat and cold exposure            | 0 (0 to 0)  | 0 (0 to 0) | -9.8% (-15.8% to -3.1%)   |
| 29 | Azerbaijan | Executions and police conflict                  | 0 (0 to 0)  | 0 (0 to 0) | NA                        |
| 30 | Azerbaijan | Exposure to forces of nature                    | 0 (0 to 0)  | 0 (0 to 0) | NA                        |
| 31 | Azerbaijan | Falls                                           | 2 (2 to 3)  | 2 (2 to 3) | 8.8% (3.3% to 14.4%)      |
| 32 | Azerbaijan | Fire, heat, and hot substances                  | 0 (0 to 0)  | 0 (0 to 0) | -19.7% (-25.2% to -14.2%) |
| 33 | Azerbaijan | Foreign body in eyes                            | 0 (0 to 0)  | 0 (0 to 0) | 0% (0% to 0%)             |
| 34 | Azerbaijan | Foreign body in other body part                 | 0 (0 to 0)  | 0 (0 to 0) | 1.3% (-3.4% to 6.6%)      |
| 35 | Azerbaijan | Motor vehicle road injuries                     | 1 (0 to 2)  | 1 (0 to 1) | -23.1% (-31.1% to -15.2%) |
| 36 | Azerbaijan | Motorcyclist road injuries                      | 0 (0 to 0)  | 0 (0 to 0) | -46.2% (-54.1% to -37.4%) |
| 37 | Azerbaijan | Non-venomous animal contact                     | 0 (0 to 0)  | 0 (0 to 0) | -9.6% (-13.4% to -5.4%)   |
| 38 | Azerbaijan | Other exposure to mechanical forces             | 1 (0 to 1)  | 1 (0 to 1) | 0.1% (-5.8% to 6.8%)      |
| 39 | Azerbaijan | Other road injuries                             | 0 (0 to 0)  | 0 (0 to 0) | 0.8% (-10.4% to 13.4%)    |
| 40 | Azerbaijan | Other transport injuries                        | 0 (0 to 0)  | 0 (0 to 0) | 10.4% (6% to 15.7%)       |
| 41 | Azerbaijan | Other unintentional injuries                    | 0 (0 to 0)  | 0 (0 to 0) | 2% (-3% to 6.5%)          |
| 42 | Azerbaijan | Pedestrian road injuries                        | 0 (0 to 0)  | 0 (0 to 0) | -20% (-29% to -10.4%)     |
| 43 | Azerbaijan | Physical violence by firearm                    | 0 (0 to 0)  | 0 (0 to 0) | -26% (-42.1% to -6.6%)    |
| 44 | Azerbaijan | Physical violence by other means                | 0 (0 to 1)  | 0 (0 to 0) | -54.8% (-61% to -47.8%)   |
| 45 |            |                                                 |             |            |                           |
| 46 |            |                                                 |             |            |                           |

|    |            |                                                 |            |            |                           |
|----|------------|-------------------------------------------------|------------|------------|---------------------------|
| 1  |            |                                                 |            |            |                           |
| 2  | Azerbaijan | Physical violence by sharp object               | 0 (0 to 0) | 0 (0 to 0) | -55.2% (-62.5% to -47%)   |
| 3  | Azerbaijan | Poisoning by carbon monoxide                    | 0 (0 to 0) | 0 (0 to 0) | 22.1% (9.6% to 35.8%)     |
| 4  | Azerbaijan | Poisoning by other means                        | 0 (0 to 0) | 0 (0 to 0) | -5.4% (-14.2% to 3%)      |
| 5  | Azerbaijan | Pulmonary aspiration and foreign body in airway | 0 (0 to 0) | 0 (0 to 0) | -10.8% (-17.5% to -3.6%)  |
| 6  | Azerbaijan | Self-harm by firearm                            | 0 (0 to 0) | 0 (0 to 0) | 34.4% (19.7% to 51.3%)    |
| 7  | Azerbaijan | Self-harm by other specified means              | 0 (0 to 0) | 0 (0 to 0) | 24% (17.5% to 31.3%)      |
| 8  | Azerbaijan | Unintentional firearm injuries                  | 0 (0 to 0) | 0 (0 to 0) | 3% (-5.3% to 11.4%)       |
| 9  | Bahamas    | Venomous animal contact                         | 0 (0 to 0) | 0 (0 to 0) | -9.2% (-14.3% to -3.5%)   |
| 10 | Bahamas    | Adverse effects of medical treatment            | 0 (0 to 0) | 0 (0 to 0) | 0% (0% to 0%)             |
| 11 | Bahamas    | Conflict and terrorism                          | 0 (0 to 0) | 0 (0 to 0) | NA                        |
| 12 | Bahamas    | Cyclist road injuries                           | 0 (0 to 1) | 0 (0 to 0) | -25.2% (-33.7% to -16%)   |
| 13 | Bahamas    | Drowning                                        | 0 (0 to 0) | 0 (0 to 0) | 17.6% (6.2% to 29.1%)     |
| 14 | Bahamas    | Environmental heat and cold exposure            | 0 (0 to 0) | 0 (0 to 0) | 0.5% (-4.1% to 4.3%)      |
| 15 | Bahamas    | Executions and police conflict                  | 0 (0 to 0) | 0 (0 to 0) | NA                        |
| 16 | Bahamas    | Exposure to forces of nature                    | 0 (0 to 0) | 0 (0 to 0) | NA                        |
| 17 | Bahamas    | Falls                                           | 1 (1 to 2) | 2 (1 to 2) | 36.9% (31.7% to 42.4%)    |
| 18 | Bahamas    | Fire, heat, and hot substances                  | 0 (0 to 0) | 0 (0 to 0) | -19% (-23.6% to -13.6%)   |
| 19 | Bahamas    | Foreign body in eyes                            | 0 (0 to 0) | 0 (0 to 0) | 0% (0% to 0%)             |
| 20 | Bahamas    | Foreign body in other body part                 | 0 (0 to 0) | 0 (0 to 0) | -5.6% (-9.3% to -1%)      |
| 21 | Bahamas    | Motor vehicle road injuries                     | 1 (0 to 1) | 1 (0 to 1) | -26.8% (-34% to -18.5%)   |
| 22 | Bahamas    | Motorcyclist road injuries                      | 0 (0 to 1) | 0 (0 to 1) | 13.8% (-0.5% to 32%)      |
| 23 | Bahamas    | Non-venomous animal contact                     | 0 (0 to 0) | 0 (0 to 0) | 7.4% (1.2% to 15%)        |
| 24 | Bahamas    | Other exposure to mechanical forces             | 0 (0 to 0) | 0 (0 to 0) | 16.5% (9.8% to 23%)       |
| 25 | Bahamas    | Other road injuries                             | 0 (0 to 0) | 0 (0 to 0) | -20.6% (-29.1% to -10.2%) |
| 26 | Bahamas    | Other transport injuries                        | 0 (0 to 0) | 0 (0 to 0) | 23.6% (17% to 30.9%)      |
| 27 | Bahamas    | Other unintentional injuries                    | 0 (0 to 0) | 0 (0 to 0) | -5.4% (-10.1% to -0.7%)   |
| 28 | Bahamas    | Pedestrian road injuries                        | 0 (0 to 0) | 0 (0 to 0) | -34.5% (-41.5% to -26.4%) |
| 29 | Bahamas    | Physical violence by firearm                    | 0 (0 to 0) | 0 (0 to 1) | 137% (99.1% to 191.4%)    |
| 30 | Bahamas    | Physical violence by other means                | 0 (0 to 0) | 0 (0 to 0) | 3.9% (-7.3% to 14.7%)     |
| 31 | Bahamas    | Physical violence by sharp object               | 0 (0 to 0) | 0 (0 to 0) | 16.3% (-0.2% to 33.9%)    |
| 32 | Bahamas    | Poisoning by carbon monoxide                    | 0 (0 to 0) | 0 (0 to 0) | 12.2% (-0.2% to 24.6%)    |
| 33 | Bahamas    | Poisoning by other means                        | 0 (0 to 0) | 0 (0 to 0) | -5.1% (-13.4% to 4%)      |
| 34 | Bahamas    | Pulmonary aspiration and foreign body in airway | 0 (0 to 0) | 0 (0 to 0) | -24.5% (-31.5% to -17.1%) |
| 35 | Bahamas    | Self-harm by firearm                            | 0 (0 to 0) | 0 (0 to 0) | 0.8% (-9.1% to 9.9%)      |
| 36 | Bahamas    | Self-harm by other specified means              | 0 (0 to 0) | 0 (0 to 0) | 7.6% (1.2% to 15.7%)      |
| 37 | Bahamas    | Unintentional firearm injuries                  | 0 (0 to 0) | 0 (0 to 0) | 18.4% (11.4% to 26%)      |
| 38 | Bahamas    | Venomous animal contact                         | 0 (0 to 0) | 0 (0 to 0) | 4.6% (-1.9% to 12%)       |
| 39 | Bahrain    | Adverse effects of medical treatment            | 0 (0 to 0) | 0 (0 to 0) | 0% (0% to 0%)             |
| 40 | Bahrain    | Conflict and terrorism                          | 0 (0 to 0) | 0 (0 to 0) | NA                        |
| 41 | Bahrain    | Cyclist road injuries                           | 0 (0 to 0) | 0 (0 to 0) | -6% (-15.4% to 5%)        |
| 42 | Bahrain    | Drowning                                        | 0 (0 to 0) | 0 (0 to 0) | 105.5% (72% to 142.5%)    |
| 43 | Bahrain    | Environmental heat and cold exposure            | 0 (0 to 0) | 0 (0 to 0) | 2.9% (-2% to 8%)          |
| 44 | Bahrain    | Executions and police conflict                  | 0 (0 to 0) | 0 (0 to 0) | NA                        |
| 45 |            |                                                 |            |            |                           |
| 46 |            |                                                 |            |            |                           |



|    |            |                                                 |            |            |                           |
|----|------------|-------------------------------------------------|------------|------------|---------------------------|
| 1  |            |                                                 |            |            |                           |
| 2  | Bahrain    | Exposure to forces of nature                    | 0 (0 to 0) | 0 (0 to 0) | NA                        |
| 3  | Bahrain    | Falls                                           | 1 (1 to 2) | 2 (1 to 3) | 40.6% (34.9% to 46.4%)    |
| 4  | Bahrain    | Fire, heat, and hot substances                  | 0 (0 to 0) | 0 (0 to 0) | -3.9% (-9.9% to 2%)       |
| 5  | Bahrain    | Foreign body in eyes                            | 0 (0 to 0) | 0 (0 to 0) | 0% (0% to 0%)             |
| 6  | Bahrain    | Foreign body in other body part                 | 0 (0 to 0) | 0 (0 to 0) | 1.6% (-2% to 5.2%)        |
| 7  | Bahrain    | Motor vehicle road injuries                     | 1 (1 to 2) | 1 (0 to 1) | -39.5% (-45.5% to -33.2%) |
| 8  | Bahrain    | Motorcyclist road injuries                      | 0 (0 to 0) | 0 (0 to 0) | 3.4% (-9.1% to 16.9%)     |
| 9  | Bahrain    | Non-venomous animal contact                     | 0 (0 to 0) | 0 (0 to 0) | 0.5% (-4.7% to 4.9%)      |
| 10 | Bahrain    | Other exposure to mechanical forces             | 0 (0 to 0) | 0 (0 to 0) | 9.6% (3.5% to 15.6%)      |
| 11 | Bahrain    | Other road injuries                             | 0 (0 to 0) | 0 (0 to 0) | -5.8% (-16.2% to 6.2%)    |
| 12 | Bahrain    | Other transport injuries                        | 0 (0 to 0) | 0 (0 to 0) | 7.4% (2.4% to 13.2%)      |
| 13 | Bahrain    | Other unintentional injuries                    | 0 (0 to 0) | 0 (0 to 0) | -1% (-6% to 3.7%)         |
| 14 | Bahrain    | Pedestrian road injuries                        | 0 (0 to 0) | 0 (0 to 0) | -15.2% (-24% to -5.1%)    |
| 15 | Bahrain    | Physical violence by firearm                    | 0 (0 to 0) | 0 (0 to 0) | 110.5% (84.2% to 145.5%)  |
| 16 | Bahrain    | Physical violence by other means                | 0 (0 to 0) | 0 (0 to 0) | -14.3% (-21.7% to -8%)    |
| 17 | Bahrain    | Physical violence by sharp object               | 0 (0 to 0) | 0 (0 to 0) | -12.5% (-21% to -3.7%)    |
| 18 | Bahrain    | Poisoning by carbon monoxide                    | 0 (0 to 0) | 0 (0 to 0) | 45.4% (31.2% to 61.8%)    |
| 19 | Bahrain    | Poisoning by other means                        | 0 (0 to 0) | 0 (0 to 0) | -6.5% (-13.1% to 1%)      |
| 20 | Bahrain    | Pulmonary aspiration and foreign body in airway | 0 (0 to 0) | 0 (0 to 0) | -10% (-18.4% to -2.5%)    |
| 21 | Bahrain    | Self-harm by firearm                            | 0 (0 to 0) | 0 (0 to 0) | 19.8% (6.9% to 34.1%)     |
| 22 | Bahrain    | Self-harm by other specified means              | 0 (0 to 0) | 0 (0 to 0) | 33.6% (25.7% to 42.3%)    |
| 23 | Bahrain    | Unintentional firearm injuries                  | 0 (0 to 0) | 0 (0 to 0) | 10.6% (3% to 19.1%)       |
| 24 | Bahrain    | Venomous animal contact                         | 0 (0 to 0) | 0 (0 to 0) | 3.2% (-3.3% to 10.6%)     |
| 25 | Bangladesh | Adverse effects of medical treatment            | 0 (0 to 0) | 0 (0 to 0) | 0% (0% to 0%)             |
| 26 | Bangladesh | Conflict and terrorism                          | 0 (0 to 0) | 0 (0 to 0) | NA                        |
| 27 | Bangladesh | Cyclist road injuries                           | 1 (1 to 2) | 1 (1 to 2) | -5.1% (-12.1% to 2%)      |
| 28 | Bangladesh | Drowning                                        | 0 (0 to 0) | 0 (0 to 0) | -3.7% (-15.4% to 7.3%)    |
| 29 | Bangladesh | Environmental heat and cold exposure            | 0 (0 to 0) | 0 (0 to 0) | 8.9% (3.4% to 15.4%)      |
| 30 | Bangladesh | Executions and police conflict                  | 0 (0 to 0) | 0 (0 to 0) | NA                        |
| 31 | Bangladesh | Exposure to forces of nature                    | 0 (0 to 1) | 0 (0 to 0) | NA                        |
| 32 | Bangladesh | Falls                                           | 1 (1 to 1) | 1 (1 to 2) | 64.1% (57% to 71.7%)      |
| 33 | Bangladesh | Fire, heat, and hot substances                  | 0 (0 to 0) | 0 (0 to 0) | -7.9% (-18% to 1.3%)      |
| 34 | Bangladesh | Foreign body in eyes                            | 0 (0 to 0) | 0 (0 to 0) | 0% (0% to 0%)             |
| 35 | Bangladesh | Foreign body in other body part                 | 0 (0 to 0) | 0 (0 to 0) | -10.6% (-14.5% to -6.1%)  |
| 36 | Bangladesh | Motor vehicle road injuries                     | 0 (0 to 1) | 1 (0 to 1) | 12.4% (3% to 22.8%)       |
| 37 | Bangladesh | Motorcyclist road injuries                      | 0 (0 to 1) | 0 (0 to 1) | 22.2% (12.3% to 33.5%)    |
| 38 | Bangladesh | Non-venomous animal contact                     | 0 (0 to 0) | 0 (0 to 0) | -0.7% (-7% to 5.6%)       |
| 39 | Bangladesh | Other exposure to mechanical forces             | 0 (0 to 0) | 0 (0 to 0) | 30.1% (21.7% to 39%)      |
| 40 | Bangladesh | Other road injuries                             | 0 (0 to 0) | 0 (0 to 0) | 8.2% (-1.5% to 19.1%)     |
| 41 | Bangladesh | Other transport injuries                        | 0 (0 to 0) | 0 (0 to 0) | 5.4% (-0.2% to 11.1%)     |
| 42 | Bangladesh | Other unintentional injuries                    | 0 (0 to 0) | 0 (0 to 0) | 3.8% (-1.9% to 9.3%)      |
| 43 | Bangladesh | Pedestrian road injuries                        | 0 (0 to 1) | 0 (0 to 1) | 7.5% (-1.5% to 17.5%)     |
| 44 | Bangladesh | Physical violence by firearm                    | 0 (0 to 0) | 0 (0 to 0) | 44.1% (23.1% to 69.3%)    |
| 45 |            |                                                 |            |            |                           |
| 46 |            |                                                 |            |            |                           |

|    |            |                                                 |            |            |                           |
|----|------------|-------------------------------------------------|------------|------------|---------------------------|
| 1  |            |                                                 |            |            |                           |
| 2  | Bangladesh | Physical violence by other means                | 0 (0 to 0) | 0 (0 to 0) | -1% (-7.4% to 5.2%)       |
| 3  | Bangladesh | Physical violence by sharp object               | 0 (0 to 0) | 0 (0 to 0) | -7.7% (-16.1% to 1%)      |
| 4  | Bangladesh | Poisoning by carbon monoxide                    | 0 (0 to 0) | 0 (0 to 0) | 14.4% (0.9% to 29.7%)     |
| 5  | Bangladesh | Poisoning by other means                        | 0 (0 to 0) | 0 (0 to 0) | -11.4% (-18.1% to -4.7%)  |
| 6  | Bangladesh | Pulmonary aspiration and foreign body in airway | 0 (0 to 0) | 0 (0 to 0) | -32.3% (-42.1% to -21.7%) |
| 7  | Bangladesh | Self-harm by firearm                            | 0 (0 to 0) | 0 (0 to 0) | -8.6% (-22.3% to 7.7%)    |
| 8  | Bangladesh | Self-harm by other specified means              | 0 (0 to 0) | 0 (0 to 0) | -39.6% (-45.3% to -34%)   |
| 9  | Bangladesh | Unintentional firearm injuries                  | 0 (0 to 0) | 0 (0 to 0) | 7.2% (-2.8% to 15.6%)     |
| 10 | Barbados   | Venomous animal contact                         | 0 (0 to 0) | 0 (0 to 0) | 8.5% (-1.7% to 18.9%)     |
| 11 | Barbados   | Adverse effects of medical treatment            | 0 (0 to 0) | 0 (0 to 0) | 0% (0% to 0%)             |
| 12 | Barbados   | Conflict and terrorism                          | 0 (0 to 0) | 0 (0 to 0) | NA                        |
| 13 | Barbados   | Cyclist road injuries                           | 0 (0 to 0) | 0 (0 to 0) | -11.1% (-20.2% to -1.4%)  |
| 14 | Barbados   | Drowning                                        | 0 (0 to 0) | 0 (0 to 0) | 28.9% (14% to 43.1%)      |
| 15 | Barbados   | Environmental heat and cold exposure            | 0 (0 to 0) | 0 (0 to 1) | 6.4% (1.5% to 11.1%)      |
| 16 | Barbados   | Executions and police conflict                  | 0 (0 to 0) | 0 (0 to 0) | NA                        |
| 17 | Barbados   | Exposure to forces of nature                    | 0 (0 to 0) | 0 (0 to 0) | NA                        |
| 18 | Barbados   | Falls                                           | 1 (1 to 1) | 2 (1 to 2) | 48.7% (43% to 54.1%)      |
| 19 | Barbados   | Fire, heat, and hot substances                  | 0 (0 to 0) | 0 (0 to 0) | -9.5% (-15.3% to -3.6%)   |
| 20 | Barbados   | Foreign body in eyes                            | 0 (0 to 0) | 0 (0 to 0) | 0% (0% to 0%)             |
| 21 | Barbados   | Foreign body in other body part                 | 0 (0 to 0) | 0 (0 to 0) | -1.6% (-5.3% to 1.6%)     |
| 22 | Barbados   | Motor vehicle road injuries                     | 1 (0 to 1) | 0 (0 to 1) | -21.6% (-29.3% to -13.7%) |
| 23 | Barbados   | Motorcyclist road injuries                      | 0 (0 to 0) | 0 (0 to 0) | -5.5% (-18.1% to 7.5%)    |
| 24 | Barbados   | Non-venomous animal contact                     | 0 (0 to 0) | 0 (0 to 0) | -3.5% (-7.9% to 1.3%)     |
| 25 | Barbados   | Other exposure to mechanical forces             | 0 (0 to 0) | 0 (0 to 1) | 28.4% (20% to 39.2%)      |
| 26 | Barbados   | Other road injuries                             | 0 (0 to 0) | 0 (0 to 0) | -9.3% (-18.9% to 2.1%)    |
| 27 | Barbados   | Other transport injuries                        | 0 (0 to 0) | 0 (0 to 0) | -0.8% (-5.1% to 3.4%)     |
| 28 | Barbados   | Other unintentional injuries                    | 0 (0 to 0) | 0 (0 to 0) | -1.3% (-5.9% to 3.8%)     |
| 29 | Barbados   | Pedestrian road injuries                        | 0 (0 to 0) | 0 (0 to 0) | -25.8% (-33.8% to -16.9%) |
| 30 | Barbados   | Physical violence by firearm                    | 0 (0 to 0) | 0 (0 to 0) | 76.1% (51.9% to 108.6%)   |
| 31 | Barbados   | Physical violence by other means                | 0 (0 to 0) | 0 (0 to 0) | -1.7% (-12% to 8%)        |
| 32 | Barbados   | Physical violence by sharp object               | 0 (0 to 0) | 0 (0 to 0) | 3.7% (-9% to 17.7%)       |
| 33 | Barbados   | Poisoning by carbon monoxide                    | 0 (0 to 0) | 0 (0 to 0) | 22% (6.4% to 37.5%)       |
| 34 | Barbados   | Poisoning by other means                        | 0 (0 to 0) | 0 (0 to 0) | -12.3% (-21.8% to -3.9%)  |
| 35 | Barbados   | Pulmonary aspiration and foreign body in airway | 0 (0 to 0) | 0 (0 to 0) | -11.7% (-18.8% to -4%)    |
| 36 | Barbados   | Self-harm by firearm                            | 0 (0 to 0) | 0 (0 to 0) | 6.1% (-4.3% to 18.8%)     |
| 37 | Barbados   | Self-harm by other specified means              | 0 (0 to 0) | 0 (0 to 0) | -11% (-18.8% to -3.8%)    |
| 38 | Barbados   | Unintentional firearm injuries                  | 0 (0 to 0) | 0 (0 to 0) | -3.8% (-14.7% to 5%)      |
| 39 | Barbados   | Venomous animal contact                         | 0 (0 to 0) | 0 (0 to 0) | -3.4% (-8.2% to 1.8%)     |
| 40 | Belarus    | Adverse effects of medical treatment            | 0 (0 to 0) | 0 (0 to 0) | 0% (0% to 0%)             |
| 41 | Belarus    | Conflict and terrorism                          | 0 (0 to 0) | 0 (0 to 0) | NA                        |
| 42 | Belarus    | Cyclist road injuries                           | 1 (0 to 1) | 0 (0 to 1) | -27% (-36.2% to -17.1%)   |
| 43 | Belarus    | Drowning                                        | 0 (0 to 0) | 0 (0 to 0) | 10.3% (-1.9% to 21.8%)    |
| 44 | Belarus    | Environmental heat and cold exposure            | 0 (0 to 1) | 0 (0 to 0) | -9.7% (-18.9% to 2.8%)    |
| 45 |            |                                                 |            |            |                           |
| 46 |            |                                                 |            |            |                           |

|    |         |                                                 |            |             |                           |
|----|---------|-------------------------------------------------|------------|-------------|---------------------------|
| 1  |         |                                                 |            |             |                           |
| 2  | Belarus | Executions and police conflict                  | 0 (0 to 0) | 0 (0 to 0)  | NA                        |
| 3  | Belarus | Exposure to forces of nature                    | 0 (0 to 0) | 0 (0 to 0)  | NA                        |
| 4  | Belarus | Falls                                           | 6 (4 to 7) | 7 (5 to 9)  | 21.5% (16.5% to 27.5%)    |
| 5  | Belarus | Fire, heat, and hot substances                  | 0 (0 to 0) | 0 (0 to 0)  | -3.6% (-9.7% to 2%)       |
| 6  | Belarus | Foreign body in eyes                            | 0 (0 to 0) | 0 (0 to 0)  | 0% (0% to 0%)             |
| 7  | Belarus | Foreign body in other body part                 | 0 (0 to 0) | 0 (0 to 0)  | 0% (-4.8% to 4.4%)        |
| 8  | Belarus | Motor vehicle road injuries                     | 2 (1 to 4) | 2 (1 to 3)  | -30.7% (-40.4% to -21%)   |
| 9  | Belarus | Motorcyclist road injuries                      | 0 (0 to 1) | 0 (0 to 0)  | -40.7% (-50.8% to -30.1%) |
| 10 | Belarus | Non-venomous animal contact                     | 0 (0 to 0) | 0 (0 to 0)  | -10.3% (-14.1% to -6.3%)  |
| 11 | Belarus | Other exposure to mechanical forces             | 1 (0 to 2) | 1 (0 to 2)  | -5.3% (-10.8% to 0.2%)    |
| 12 | Belarus | Other road injuries                             | 0 (0 to 0) | 0 (0 to 0)  | -18.4% (-28.8% to -7.8%)  |
| 13 | Belarus | Other transport injuries                        | 0 (0 to 0) | 0 (0 to 0)  | 3.4% (-0.6% to 7.2%)      |
| 14 | Belarus | Other unintentional injuries                    | 0 (0 to 0) | 0 (0 to 0)  | -8.6% (-14% to -3.4%)     |
| 15 | Belarus | Pedestrian road injuries                        | 1 (0 to 1) | 0 (0 to 1)  | -53.2% (-59.8% to -46.4%) |
| 16 | Belarus | Physical violence by firearm                    | 0 (0 to 0) | 0 (0 to 0)  | 52% (29.2% to 82.3%)      |
| 17 | Belarus | Physical violence by other means                | 0 (0 to 1) | 0 (0 to 1)  | -18.3% (-26.5% to -7%)    |
| 18 | Belarus | Physical violence by sharp object               | 0 (0 to 0) | 0 (0 to 0)  | -32.9% (-42.7% to -21.9%) |
| 19 | Belarus | Poisoning by carbon monoxide                    | 0 (0 to 0) | 0 (0 to 0)  | -14.1% (-25.9% to -1.1%)  |
| 20 | Belarus | Poisoning by other means                        | 0 (0 to 0) | 0 (0 to 0)  | -7.6% (-17.5% to 2.1%)    |
| 21 | Belarus | Pulmonary aspiration and foreign body in airway | 0 (0 to 0) | 0 (0 to 0)  | -12.8% (-18.9% to -6%)    |
| 22 | Belarus | Self-harm by firearm                            | 0 (0 to 0) | 0 (0 to 0)  | 8% (-8.3% to 26.2%)       |
| 23 | Belarus | Self-harm by other specified means              | 0 (0 to 1) | 0 (0 to 1)  | -3.1% (-8.8% to 3.5%)     |
| 24 | Belarus | Unintentional firearm injuries                  | 0 (0 to 0) | 0 (0 to 0)  | 3.2% (-6.5% to 13.1%)     |
| 25 | Belarus | Venomous animal contact                         | 0 (0 to 0) | 0 (0 to 0)  | -10.4% (-16.2% to -4.7%)  |
| 26 | Belgium | Adverse effects of medical treatment            | 0 (0 to 0) | 0 (0 to 0)  | 0% (0% to 0%)             |
| 27 | Belgium | Conflict and terrorism                          | 0 (0 to 0) | 0 (0 to 0)  | NA                        |
| 28 | Belgium | Cyclist road injuries                           | 0 (0 to 0) | 0 (0 to 0)  | -21% (-32.2% to -8.4%)    |
| 29 | Belgium | Drowning                                        | 0 (0 to 0) | 0 (0 to 0)  | 51.1% (38.1% to 66.5%)    |
| 30 | Belgium | Environmental heat and cold exposure            | 0 (0 to 0) | 0 (0 to 0)  | -0.8% (-5.4% to 4.1%)     |
| 31 | Belgium | Executions and police conflict                  | 0 (0 to 0) | 0 (0 to 0)  | NA                        |
| 32 | Belgium | Exposure to forces of nature                    | 0 (0 to 0) | 0 (0 to 0)  | NA                        |
| 33 | Belgium | Falls                                           | 7 (5 to 9) | 9 (6 to 12) | 33.4% (29.1% to 38.3%)    |
| 34 | Belgium | Fire, heat, and hot substances                  | 0 (0 to 0) | 0 (0 to 0)  | -12.3% (-17.7% to -7.4%)  |
| 35 | Belgium | Foreign body in eyes                            | 0 (0 to 0) | 0 (0 to 0)  | 0% (0% to 0%)             |
| 36 | Belgium | Foreign body in other body part                 | 0 (0 to 0) | 0 (0 to 0)  | 7.5% (3% to 12.7%)        |
| 37 | Belgium | Motor vehicle road injuries                     | 1 (0 to 1) | 0 (0 to 1)  | -50.7% (-57.7% to -43.6%) |
| 38 | Belgium | Motorcyclist road injuries                      | 0 (0 to 0) | 0 (0 to 0)  | -5.7% (-22.2% to 14%)     |
| 39 | Belgium | Non-venomous animal contact                     | 0 (0 to 0) | 0 (0 to 0)  | -7.6% (-11.3% to -3.4%)   |
| 40 | Belgium | Other exposure to mechanical forces             | 1 (0 to 1) | 1 (0 to 1)  | -5.4% (-11.6% to -0.1%)   |
| 41 | Belgium | Other road injuries                             | 0 (0 to 0) | 0 (0 to 0)  | -9.3% (-23.2% to 7.2%)    |
| 42 | Belgium | Other transport injuries                        | 0 (0 to 0) | 0 (0 to 0)  | 10.3% (5.2% to 15.2%)     |
| 43 | Belgium | Other unintentional injuries                    | 0 (0 to 0) | 0 (0 to 0)  | -7.4% (-12% to -2.7%)     |
| 44 | Belgium | Pedestrian road injuries                        | 0 (0 to 0) | 0 (0 to 0)  | -63.5% (-70.3% to -55.8%) |
| 45 |         |                                                 |            |             |                           |
| 46 |         |                                                 |            |             |                           |

|    |         |                                                 |            |            |                           |
|----|---------|-------------------------------------------------|------------|------------|---------------------------|
| 1  |         |                                                 |            |            |                           |
| 2  | Belgium | Physical violence by firearm                    | 0 (0 to 0) | 0 (0 to 0) | 7.6% (-2.9% to 19.4%)     |
| 3  | Belgium | Physical violence by other means                | 0 (0 to 0) | 0 (0 to 0) | -13.4% (-19.9% to -7.5%)  |
| 4  | Belgium | Physical violence by sharp object               | 0 (0 to 0) | 0 (0 to 0) | -20.4% (-28.6% to -12.3%) |
| 5  | Belgium | Poisoning by carbon monoxide                    | 0 (0 to 0) | 0 (0 to 0) | -24.6% (-32.9% to -16%)   |
| 6  | Belgium | Poisoning by other means                        | 0 (0 to 0) | 0 (0 to 0) | -29.2% (-35.5% to -22.6%) |
| 7  | Belgium | Pulmonary aspiration and foreign body in airway | 0 (0 to 0) | 0 (0 to 0) | -10.9% (-20.6% to 0.2%)   |
| 8  | Belgium | Self-harm by firearm                            | 0 (0 to 0) | 0 (0 to 0) | -28% (-40.5% to -15.3%)   |
| 9  | Belgium | Self-harm by other specified means              | 0 (0 to 1) | 0 (0 to 1) | -8.2% (-13% to -3.4%)     |
| 10 | Belgium | Unintentional firearm injuries                  | 0 (0 to 0) | 0 (0 to 0) | -1.1% (-9.5% to 7.4%)     |
| 11 | Belgium | Venomous animal contact                         | 0 (0 to 0) | 0 (0 to 0) | -8% (-13.6% to -1.1%)     |
| 12 | Belize  | Adverse effects of medical treatment            | 0 (0 to 0) | 0 (0 to 0) | 0% (0% to 0%)             |
| 13 | Belize  | Conflict and terrorism                          | 2 (0 to 5) | 0 (0 to 0) | NA                        |
| 14 | Belize  | Cyclist road injuries                           | 0 (0 to 1) | 0 (0 to 1) | -22% (-31.6% to -11.2%)   |
| 15 | Belize  | Drowning                                        | 0 (0 to 0) | 0 (0 to 0) | 26.2% (15.9% to 38.8%)    |
| 16 | Belize  | Environmental heat and cold exposure            | 0 (0 to 0) | 0 (0 to 0) | 5.2% (1.5% to 9.6%)       |
| 17 | Belize  | Executions and police conflict                  | 0 (0 to 0) | 0 (0 to 0) | NA                        |
| 18 | Belize  | Exposure to forces of nature                    | 0 (0 to 0) | 0 (0 to 0) | NA                        |
| 19 | Belize  | Falls                                           | 1 (1 to 1) | 1 (1 to 2) | 55.7% (49.9% to 61.7%)    |
| 20 | Belize  | Fire, heat, and hot substances                  | 0 (0 to 0) | 0 (0 to 0) | 3.1% (-4.2% to 11.9%)     |
| 21 | Belize  | Foreign body in eyes                            | 0 (0 to 0) | 0 (0 to 0) | 0% (0% to 0%)             |
| 22 | Belize  | Foreign body in other body part                 | 0 (0 to 0) | 0 (0 to 0) | -2.4% (-6.3% to 1.6%)     |
| 23 | Belize  | Motor vehicle road injuries                     | 1 (0 to 1) | 1 (0 to 1) | -7.1% (-16.9% to 3.8%)    |
| 24 | Belize  | Motorcyclist road injuries                      | 0 (0 to 0) | 0 (0 to 1) | 54.2% (30.8% to 82.1%)    |
| 25 | Belize  | Non-venomous animal contact                     | 0 (0 to 0) | 0 (0 to 0) | 25.4% (14.2% to 37.9%)    |
| 26 | Belize  | Other exposure to mechanical forces             | 0 (0 to 1) | 0 (0 to 1) | 31.6% (20.1% to 42.7%)    |
| 27 | Belize  | Other road injuries                             | 0 (0 to 0) | 0 (0 to 0) | 2% (-9.2% to 14.2%)       |
| 28 | Belize  | Other transport injuries                        | 0 (0 to 0) | 0 (0 to 0) | 27.2% (19.1% to 36.1%)    |
| 29 | Belize  | Other unintentional injuries                    | 0 (0 to 0) | 0 (0 to 0) | 3.8% (-1.4% to 8.9%)      |
| 30 | Belize  | Pedestrian road injuries                        | 0 (0 to 0) | 0 (0 to 0) | -13.6% (-23.2% to -2.5%)  |
| 31 | Belize  | Physical violence by firearm                    | 0 (0 to 0) | 0 (0 to 0) | 283.5% (215.8% to 390.7%) |
| 32 | Belize  | Physical violence by other means                | 0 (0 to 0) | 0 (0 to 0) | 58% (37.7% to 78.8%)      |
| 33 | Belize  | Physical violence by sharp object               | 0 (0 to 0) | 0 (0 to 0) | 68.8% (42.5% to 96%)      |
| 34 | Belize  | Poisoning by carbon monoxide                    | 0 (0 to 0) | 0 (0 to 0) | 18.2% (-1.2% to 37.8%)    |
| 35 | Belize  | Poisoning by other means                        | 0 (0 to 0) | 0 (0 to 0) | -28.2% (-39.5% to -15.7%) |
| 36 | Belize  | Pulmonary aspiration and foreign body in airway | 0 (0 to 0) | 0 (0 to 0) | -23.9% (-31.2% to -15.4%) |
| 37 | Belize  | Self-harm by firearm                            | 0 (0 to 0) | 0 (0 to 0) | 28.9% (15.3% to 46.9%)    |
| 38 | Belize  | Self-harm by other specified means              | 0 (0 to 0) | 0 (0 to 0) | 4.5% (-5% to 13.2%)       |
| 39 | Belize  | Unintentional firearm injuries                  | 0 (0 to 1) | 0 (0 to 1) | 17% (4.6% to 27.2%)       |
| 40 | Belize  | Venomous animal contact                         | 0 (0 to 0) | 0 (0 to 0) | 40.6% (26.6% to 58.6%)    |
| 41 | Benin   | Adverse effects of medical treatment            | 0 (0 to 0) | 0 (0 to 0) | 0% (0% to 0%)             |
| 42 | Benin   | Conflict and terrorism                          | 0 (0 to 0) | 0 (0 to 0) | NA                        |
| 43 | Benin   | Cyclist road injuries                           | 1 (1 to 3) | 1 (1 to 3) | 0.9% (-8% to 9.2%)        |
| 44 | Benin   | Drowning                                        | 0 (0 to 0) | 0 (0 to 0) | -13.1% (-20% to -6%)      |
| 45 |         |                                                 |            |            |                           |
| 46 |         |                                                 |            |            |                           |

|    |         |                                                 |            |            |                           |
|----|---------|-------------------------------------------------|------------|------------|---------------------------|
| 1  |         |                                                 |            |            |                           |
| 2  | Benin   | Environmental heat and cold exposure            | 0 (0 to 0) | 0 (0 to 0) | 2.6% (-2% to 8.1%)        |
| 3  | Benin   | Executions and police conflict                  | 0 (0 to 0) | 0 (0 to 0) | NA                        |
| 4  | Benin   | Exposure to forces of nature                    | 0 (0 to 0) | 0 (0 to 0) | NA                        |
| 5  | Benin   | Falls                                           | 3 (2 to 4) | 3 (2 to 4) | 14.7% (10.8% to 19.3%)    |
| 6  | Benin   | Fire, heat, and hot substances                  | 0 (0 to 0) | 0 (0 to 0) | -5.9% (-10.9% to -0.6%)   |
| 7  | Benin   | Foreign body in eyes                            | 0 (0 to 0) | 0 (0 to 0) | 0% (0% to 0%)             |
| 8  | Benin   | Foreign body in other body part                 | 1 (0 to 1) | 1 (0 to 1) | 0.3% (-3.1% to 3.4%)      |
| 9  | Benin   | Motor vehicle road injuries                     | 1 (1 to 3) | 2 (1 to 3) | 25% (15.6% to 36.8%)      |
| 10 | Benin   | Motorcyclist road injuries                      | 1 (1 to 3) | 1 (0 to 2) | -23.7% (-30.2% to -16.8%) |
| 11 | Benin   | Non-venomous animal contact                     | 0 (0 to 0) | 0 (0 to 0) | -2.2% (-6.5% to 2.3%)     |
| 12 | Benin   | Other exposure to mechanical forces             | 0 (0 to 0) | 0 (0 to 0) | -10% (-14.6% to -5.5%)    |
| 13 | Benin   | Other road injuries                             | 0 (0 to 0) | 0 (0 to 0) | 9.1% (-1.9% to 21.3%)     |
| 14 | Benin   | Other transport injuries                        | 0 (0 to 1) | 0 (0 to 1) | -11.7% (-15.7% to -7.7%)  |
| 15 | Benin   | Other unintentional injuries                    | 0 (0 to 1) | 0 (0 to 0) | -12.5% (-16.9% to -7.8%)  |
| 16 | Benin   | Pedestrian road injuries                        | 1 (1 to 3) | 2 (1 to 3) | 19.4% (11.2% to 28.7%)    |
| 17 | Benin   | Physical violence by firearm                    | 0 (0 to 0) | 0 (0 to 0) | 37.4% (24.1% to 55.3%)    |
| 18 | Benin   | Physical violence by other means                | 0 (0 to 0) | 0 (0 to 0) | 17.3% (10.7% to 24.6%)    |
| 19 | Benin   | Physical violence by sharp object               | 0 (0 to 0) | 0 (0 to 0) | 17.9% (9.8% to 26.5%)     |
| 20 | Benin   | Poisoning by carbon monoxide                    | 0 (0 to 0) | 0 (0 to 0) | 14.1% (2.6% to 27.3%)     |
| 21 | Benin   | Poisoning by other means                        | 0 (0 to 0) | 0 (0 to 0) | -17.9% (-23.9% to -11.6%) |
| 22 | Benin   | Pulmonary aspiration and foreign body in airway | 0 (0 to 0) | 0 (0 to 0) | -8.6% (-16.7% to 0.4%)    |
| 23 | Benin   | Self-harm by firearm                            | 0 (0 to 0) | 0 (0 to 0) | 19.5% (7.3% to 34.8%)     |
| 24 | Benin   | Self-harm by other specified means              | 0 (0 to 0) | 0 (0 to 0) | 12.6% (7.6% to 17.9%)     |
| 25 | Benin   | Unintentional firearm injuries                  | 0 (0 to 0) | 0 (0 to 0) | -14.3% (-21.5% to -7.3%)  |
| 26 | Benin   | Venomous animal contact                         | 0 (0 to 0) | 0 (0 to 0) | -1.8% (-7.9% to 5.3%)     |
| 27 | Bermuda | Adverse effects of medical treatment            | 0 (0 to 0) | 0 (0 to 0) | 0% (0% to 0%)             |
| 28 | Bermuda | Conflict and terrorism                          | 0 (0 to 0) | 0 (0 to 0) | NA                        |
| 29 | Bermuda | Cyclist road injuries                           | 1 (0 to 2) | 1 (0 to 1) | -22% (-30.2% to -12.1%)   |
| 30 | Bermuda | Drowning                                        | 0 (0 to 0) | 0 (0 to 0) | 67% (51.6% to 83.7%)      |
| 31 | Bermuda | Environmental heat and cold exposure            | 0 (0 to 0) | 0 (0 to 0) | 2.5% (-1.4% to 7.1%)      |
| 32 | Bermuda | Executions and police conflict                  | 0 (0 to 0) | 0 (0 to 0) | NA                        |
| 33 | Bermuda | Exposure to forces of nature                    | 0 (0 to 0) | 0 (0 to 0) | NA                        |
| 34 | Bermuda | Falls                                           | 4 (3 to 5) | 6 (4 to 8) | 49.6% (43.6% to 55.1%)    |
| 35 | Bermuda | Fire, heat, and hot substances                  | 0 (0 to 0) | 0 (0 to 1) | 21.4% (16.1% to 27.6%)    |
| 36 | Bermuda | Foreign body in eyes                            | 0 (0 to 0) | 0 (0 to 0) | 0% (0% to 0%)             |
| 37 | Bermuda | Foreign body in other body part                 | 0 (0 to 0) | 0 (0 to 0) | 6.7% (0.7% to 11.5%)      |
| 38 | Bermuda | Motor vehicle road injuries                     | 1 (0 to 1) | 0 (0 to 1) | -24.4% (-33.8% to -14.1%) |
| 39 | Bermuda | Motorcyclist road injuries                      | 2 (1 to 4) | 2 (1 to 3) | -31.2% (-38.9% to -23%)   |
| 40 | Bermuda | Non-venomous animal contact                     | 0 (0 to 0) | 0 (0 to 0) | -2.4% (-6.4% to 2.2%)     |
| 41 | Bermuda | Other exposure to mechanical forces             | 0 (0 to 1) | 1 (0 to 1) | 19.2% (11.9% to 26%)      |
| 42 | Bermuda | Other road injuries                             | 0 (0 to 0) | 0 (0 to 0) | -18.9% (-27.4% to -8.7%)  |
| 43 | Bermuda | Other transport injuries                        | 0 (0 to 0) | 0 (0 to 0) | 9.7% (5.1% to 15.3%)      |
| 44 | Bermuda | Other unintentional injuries                    | 0 (0 to 1) | 1 (0 to 1) | 11.8% (5.5% to 17.6%)     |
| 45 |         |                                                 |            |            |                           |
| 46 |         |                                                 |            |            |                           |

|    |                                  |                                                 |            |            |                           |
|----|----------------------------------|-------------------------------------------------|------------|------------|---------------------------|
| 1  |                                  |                                                 |            |            |                           |
| 2  | Bermuda                          | Pedestrian road injuries                        | 1 (0 to 1) | 0 (0 to 1) | -16.2% (-25% to -6%)      |
| 3  | Bermuda                          | Physical violence by firearm                    | 0 (0 to 0) | 0 (0 to 0) | 79.9% (59.9% to 107.6%)   |
| 4  | Bermuda                          | Physical violence by other means                | 0 (0 to 0) | 0 (0 to 0) | -4.1% (-13.1% to 4%)      |
| 5  | Bermuda                          | Physical violence by sharp object               | 0 (0 to 0) | 0 (0 to 0) | -7.6% (-18.7% to 2.3%)    |
| 6  | Bermuda                          | Poisoning by carbon monoxide                    | 0 (0 to 0) | 0 (0 to 0) | 2.3% (-10.8% to 15.9%)    |
| 7  | Bermuda                          | Poisoning by other means                        | 0 (0 to 0) | 0 (0 to 0) | -19.1% (-30.2% to -7.7%)  |
| 8  | Bermuda                          | Pulmonary aspiration and foreign body in airway | 0 (0 to 0) | 0 (0 to 0) | -1.7% (-11.1% to 7.5%)    |
| 9  | Bermuda                          | Self-harm by firearm                            | 0 (0 to 0) | 0 (0 to 0) | 5.7% (-4.6% to 20.6%)     |
| 10 | Bermuda                          | Self-harm by other specified means              | 0 (0 to 0) | 0 (0 to 0) | -15.1% (-23.7% to -6.8%)  |
| 11 | Bermuda                          | Unintentional firearm injuries                  | 0 (0 to 0) | 0 (0 to 0) | 34.6% (24.8% to 47%)      |
| 12 | Bermuda                          | Venomous animal contact                         | 0 (0 to 0) | 0 (0 to 0) | -2.6% (-7.7% to 2.8%)     |
| 13 | Bhutan                           | Adverse effects of medical treatment            | 0 (0 to 0) | 0 (0 to 0) | 0% (0% to 0%)             |
| 14 | Bhutan                           | Conflict and terrorism                          | 0 (0 to 0) | 0 (0 to 0) | NA                        |
| 15 | Bhutan                           | Cyclist road injuries                           | 1 (0 to 1) | 1 (1 to 2) | 31.4% (21% to 42.9%)      |
| 16 | Bhutan                           | Drowning                                        | 0 (0 to 0) | 0 (0 to 0) | 24.8% (8.6% to 38.5%)     |
| 17 | Bhutan                           | Environmental heat and cold exposure            | 0 (0 to 0) | 0 (0 to 0) | 6.5% (2.3% to 11%)        |
| 18 | Bhutan                           | Executions and police conflict                  | 0 (0 to 0) | 0 (0 to 0) | NA                        |
| 19 | Bhutan                           | Exposure to forces of nature                    | 0 (0 to 0) | 0 (0 to 0) | NA                        |
| 20 | Bhutan                           | Falls                                           | 1 (1 to 2) | 3 (2 to 4) | 101.1% (90.9% to 112.6%)  |
| 21 | Bhutan                           | Fire, heat, and hot substances                  | 0 (0 to 0) | 0 (0 to 0) | -9.2% (-15.3% to -2.3%)   |
| 22 | Bhutan                           | Foreign body in eyes                            | 0 (0 to 0) | 0 (0 to 0) | 0% (0% to 0%)             |
| 23 | Bhutan                           | Foreign body in other body part                 | 0 (0 to 0) | 0 (0 to 0) | 0.9% (-3.9% to 4.7%)      |
| 24 | Bhutan                           | Motor vehicle road injuries                     | 1 (0 to 1) | 1 (0 to 2) | 16.2% (6.6% to 26.4%)     |
| 25 | Bhutan                           | Motorcyclist road injuries                      | 0 (0 to 1) | 0 (0 to 1) | -4.3% (-13.8% to 4.9%)    |
| 26 | Bhutan                           | Non-venomous animal contact                     | 0 (0 to 1) | 0 (0 to 0) | -20.8% (-25.7% to -15.4%) |
| 27 | Bhutan                           | Other exposure to mechanical forces             | 0 (0 to 1) | 0 (0 to 1) | -8.3% (-14.8% to -1.3%)   |
| 28 | Bhutan                           | Other road injuries                             | 0 (0 to 0) | 0 (0 to 0) | 36.8% (25.4% to 49.7%)    |
| 29 | Bhutan                           | Other transport injuries                        | 0 (0 to 0) | 0 (0 to 0) | -4.8% (-10.9% to 1.8%)    |
| 30 | Bhutan                           | Other unintentional injuries                    | 0 (0 to 0) | 0 (0 to 0) | 2.7% (-1.3% to 6.8%)      |
| 31 | Bhutan                           | Pedestrian road injuries                        | 1 (0 to 1) | 0 (0 to 1) | -17.6% (-24.5% to -10%)   |
| 32 | Bhutan                           | Physical violence by firearm                    | 0 (0 to 0) | 0 (0 to 0) | 60.3% (35.8% to 87.7%)    |
| 33 | Bhutan                           | Physical violence by other means                | 0 (0 to 1) | 0 (0 to 1) | 1.1% (-5% to 7.2%)        |
| 34 | Bhutan                           | Physical violence by sharp object               | 0 (0 to 0) | 0 (0 to 0) | -13.3% (-21.7% to -5.7%)  |
| 35 | Bhutan                           | Poisoning by carbon monoxide                    | 0 (0 to 0) | 0 (0 to 0) | 46.3% (28.8% to 66.6%)    |
| 36 | Bhutan                           | Poisoning by other means                        | 0 (0 to 0) | 0 (0 to 0) | 0.3% (-8.5% to 9.5%)      |
| 37 | Bhutan                           | Pulmonary aspiration and foreign body in airway | 0 (0 to 0) | 0 (0 to 0) | -26.9% (-33.5% to -20.1%) |
| 38 | Bhutan                           | Self-harm by firearm                            | 0 (0 to 0) | 0 (0 to 0) | 17.3% (3.7% to 37.8%)     |
| 39 | Bhutan                           | Self-harm by other specified means              | 0 (0 to 0) | 0 (0 to 0) | -4.2% (-10.9% to 2.6%)    |
| 40 | Bhutan                           | Unintentional firearm injuries                  | 0 (0 to 0) | 0 (0 to 0) | -36.7% (-44.2% to -30.2%) |
| 41 | Bhutan                           | Venomous animal contact                         | 0 (0 to 0) | 0 (0 to 0) | -5.6% (-13.7% to 3.7%)    |
| 42 | Bolivia (Plurinational State of) | Adverse effects of medical treatment            | 0 (0 to 0) | 0 (0 to 0) | 0% (0% to 0%)             |
| 43 | Bolivia (Plurinational State of) | Conflict and terrorism                          | 0 (0 to 0) | 0 (0 to 0) | NA                        |
| 44 | Bolivia (Plurinational State of) | Cyclist road injuries                           | 0 (0 to 0) | 0 (0 to 0) | -11.5% (-19.7% to -3.2%)  |
| 45 |                                  |                                                 |            |            |                           |
| 46 |                                  |                                                 |            |            |                           |

|    |                                  |                                                 |             |            |                           |
|----|----------------------------------|-------------------------------------------------|-------------|------------|---------------------------|
| 1  |                                  |                                                 |             |            |                           |
| 2  | Bolivia (Plurinational State of) | Drowning                                        | 0 (0 to 0)  | 0 (0 to 0) | -15.8% (-24.7% to -5.8%)  |
| 3  | Bolivia (Plurinational State of) | Environmental heat and cold exposure            | 0 (0 to 0)  | 0 (0 to 0) | -0.5% (-4.4% to 3.9%)     |
| 4  | Bolivia (Plurinational State of) | Executions and police conflict                  | 0 (0 to 0)  | 0 (0 to 0) | NA                        |
| 5  | Bolivia (Plurinational State of) | Exposure to forces of nature                    | 0 (0 to 0)  | 0 (0 to 0) | NA                        |
| 6  | Bolivia (Plurinational State of) | Falls                                           | 1 (1 to 2)  | 2 (1 to 2) | 33.9% (28.4% to 39.5%)    |
| 7  | Bolivia (Plurinational State of) | Fire, heat, and hot substances                  | 0 (0 to 0)  | 0 (0 to 0) | -21% (-27.6% to -14.6%)   |
| 8  | Bolivia (Plurinational State of) | Foreign body in eyes                            | 0 (0 to 0)  | 0 (0 to 0) | 0% (0% to 0%)             |
| 9  | Bolivia (Plurinational State of) | Foreign body in other body part                 | 0 (0 to 0)  | 0 (0 to 0) | -9.8% (-15.6% to -4.5%)   |
| 10 | Bolivia (Plurinational State of) | Motor vehicle road injuries                     | 0 (0 to 1)  | 0 (0 to 1) | -12.2% (-18.9% to -4.6%)  |
| 11 | Bolivia (Plurinational State of) | Motorcyclist road injuries                      | 0 (0 to 0)  | 0 (0 to 0) | -7.7% (-16.8% to 3%)      |
| 12 | Bolivia (Plurinational State of) | Non-venomous animal contact                     | 0 (0 to 0)  | 0 (0 to 0) | -5.2% (-9.6% to -0.6%)    |
| 13 | Bolivia (Plurinational State of) | Other exposure to mechanical forces             | 0 (0 to 1)  | 0 (0 to 1) | 8.4% (-0.7% to 19.8%)     |
| 14 | Bolivia (Plurinational State of) | Other road injuries                             | 0 (0 to 0)  | 0 (0 to 0) | -8.9% (-17.9% to 1%)      |
| 15 | Bolivia (Plurinational State of) | Other transport injuries                        | 0 (0 to 0)  | 0 (0 to 0) | -1.1% (-5.4% to 3.5%)     |
| 16 | Bolivia (Plurinational State of) | Other unintentional injuries                    | 0 (0 to 0)  | 0 (0 to 0) | -32.2% (-36.1% to -28.3%) |
| 17 | Bolivia (Plurinational State of) | Pedestrian road injuries                        | 0 (0 to 0)  | 0 (0 to 0) | -38.8% (-44.6% to -32.3%) |
| 18 | Bolivia (Plurinational State of) | Physical violence by firearm                    | 0 (0 to 0)  | 0 (0 to 0) | 48.4% (30% to 74.6%)      |
| 19 | Bolivia (Plurinational State of) | Physical violence by other means                | 0 (0 to 0)  | 0 (0 to 0) | -9.6% (-18.1% to -2%)     |
| 20 | Bolivia (Plurinational State of) | Physical violence by sharp object               | 0 (0 to 0)  | 0 (0 to 0) | -10.6% (-18.9% to -2.1%)  |
| 21 | Bolivia (Plurinational State of) | Poisoning by carbon monoxide                    | 0 (0 to 0)  | 0 (0 to 0) | 49.6% (28.3% to 73.2%)    |
| 22 | Bolivia (Plurinational State of) | Poisoning by other means                        | 0 (0 to 0)  | 0 (0 to 0) | -17.9% (-25.6% to -9.9%)  |
| 23 | Bolivia (Plurinational State of) | Pulmonary aspiration and foreign body in airway | 0 (0 to 0)  | 0 (0 to 0) | -53.1% (-60.1% to -46.1%) |
| 24 | Bolivia (Plurinational State of) | Self-harm by firearm                            | 0 (0 to 0)  | 0 (0 to 0) | 25% (10.4% to 40.3%)      |
| 25 | Bolivia (Plurinational State of) | Self-harm by other specified means              | 0 (0 to 0)  | 0 (0 to 0) | 7.3% (-0.6% to 15.5%)     |
| 26 | Bolivia (Plurinational State of) | Unintentional firearm injuries                  | 0 (0 to 0)  | 0 (0 to 0) | -23.8% (-32.9% to -16.5%) |
| 27 | Bolivia (Plurinational State of) | Venomous animal contact                         | 0 (0 to 0)  | 0 (0 to 0) | -8% (-12.4% to -3.2%)     |
| 28 | Bosnia and Herzegovina           | Adverse effects of medical treatment            | 0 (0 to 0)  | 0 (0 to 0) | 0% (0% to 0%)             |
| 29 | Bosnia and Herzegovina           | Conflict and terrorism                          | 4 (1 to 14) | 0 (0 to 0) | NA                        |
| 30 | Bosnia and Herzegovina           | Cyclist road injuries                           | 1 (0 to 1)  | 1 (0 to 1) | -4.9% (-13% to 3.4%)      |
| 31 | Bosnia and Herzegovina           | Drowning                                        | 0 (0 to 0)  | 0 (0 to 0) | 116.7% (86.1% to 145.4%)  |
| 32 | Bosnia and Herzegovina           | Environmental heat and cold exposure            | 0 (0 to 0)  | 0 (0 to 0) | 4.7% (-1.1% to 11.3%)     |
| 33 | Bosnia and Herzegovina           | Executions and police conflict                  | 0 (0 to 0)  | 0 (0 to 0) | NA                        |
| 34 | Bosnia and Herzegovina           | Exposure to forces of nature                    | 0 (0 to 0)  | 0 (0 to 0) | NA                        |
| 35 | Bosnia and Herzegovina           | Falls                                           | 4 (3 to 6)  | 5 (4 to 7) | 25.4% (20.7% to 30.3%)    |
| 36 | Bosnia and Herzegovina           | Fire, heat, and hot substances                  | 0 (0 to 0)  | 0 (0 to 0) | -16.9% (-21.2% to -12.9%) |
| 37 | Bosnia and Herzegovina           | Foreign body in eyes                            | 0 (0 to 0)  | 0 (0 to 0) | 0% (0% to 0%)             |
| 38 | Bosnia and Herzegovina           | Foreign body in other body part                 | 0 (0 to 0)  | 0 (0 to 0) | -3.8% (-7.3% to 0.2%)     |
| 39 | Bosnia and Herzegovina           | Motor vehicle road injuries                     | 1 (1 to 2)  | 1 (1 to 2) | 17.8% (8.1% to 28%)       |
| 40 | Bosnia and Herzegovina           | Motorcyclist road injuries                      | 0 (0 to 0)  | 0 (0 to 0) | 6% (-7% to 20.8%)         |
| 41 | Bosnia and Herzegovina           | Non-venomous animal contact                     | 0 (0 to 0)  | 0 (0 to 0) | -30% (-33.1% to -25.9%)   |
| 42 | Bosnia and Herzegovina           | Other exposure to mechanical forces             | 2 (1 to 3)  | 2 (1 to 3) | -7.2% (-13.4% to -1%)     |
| 43 | Bosnia and Herzegovina           | Other road injuries                             | 0 (0 to 0)  | 0 (0 to 0) | -9.7% (-17.6% to -1%)     |
| 44 | Bosnia and Herzegovina           | Other transport injuries                        | 0 (0 to 0)  | 0 (0 to 0) | -7.8% (-12.3% to -3.7%)   |
| 45 |                                  |                                                 |             |            |                           |
| 46 |                                  |                                                 |             |            |                           |

|    |                        |                                                 |            |            |                           |
|----|------------------------|-------------------------------------------------|------------|------------|---------------------------|
| 1  |                        |                                                 |            |            |                           |
| 2  | Bosnia and Herzegovina | Other unintentional injuries                    | 0 (0 to 1) | 0 (0 to 0) | -10.7% (-15.5% to -6.5%)  |
| 3  | Bosnia and Herzegovina | Pedestrian road injuries                        | 0 (0 to 1) | 0 (0 to 1) | -7.1% (-14.3% to 0.7%)    |
| 4  | Bosnia and Herzegovina | Physical violence by firearm                    | 0 (0 to 0) | 0 (0 to 0) | 107.8% (85.2% to 136.6%)  |
| 5  | Bosnia and Herzegovina | Physical violence by other means                | 1 (0 to 1) | 0 (0 to 1) | -22.5% (-28.6% to -16.6%) |
| 6  | Bosnia and Herzegovina | Physical violence by sharp object               | 0 (0 to 0) | 0 (0 to 0) | -5.6% (-14.3% to 4.3%)    |
| 7  | Bosnia and Herzegovina | Poisoning by carbon monoxide                    | 0 (0 to 0) | 0 (0 to 0) | -4.7% (-22.2% to 14.8%)   |
| 8  | Bosnia and Herzegovina | Poisoning by other means                        | 0 (0 to 0) | 0 (0 to 0) | -43.2% (-53.6% to -31.1%) |
| 9  | Bosnia and Herzegovina | Pulmonary aspiration and foreign body in airway | 0 (0 to 0) | 0 (0 to 0) | -14.8% (-21.5% to -6.7%)  |
| 10 | Bosnia and Herzegovina | Self-harm by firearm                            | 0 (0 to 0) | 0 (0 to 0) | 44.9% (27.8% to 64.9%)    |
| 11 | Bosnia and Herzegovina | Self-harm by other specified means              | 0 (0 to 0) | 0 (0 to 0) | -2% (-7.8% to 3.1%)       |
| 12 | Bosnia and Herzegovina | Unintentional firearm injuries                  | 0 (0 to 0) | 0 (0 to 0) | -19.8% (-28.1% to -12.3%) |
| 13 | Bosnia and Herzegovina | Venomous animal contact                         | 0 (0 to 0) | 0 (0 to 0) | -31.3% (-35.6% to -26.7%) |
| 14 | Botswana               | Adverse effects of medical treatment            | 0 (0 to 0) | 0 (0 to 0) | 0% (0% to 0%)             |
| 15 | Botswana               | Conflict and terrorism                          | 0 (0 to 0) | 0 (0 to 0) | NA                        |
| 16 | Botswana               | Cyclist road injuries                           | 1 (0 to 1) | 1 (0 to 1) | 25.7% (16.9% to 34.9%)    |
| 17 | Botswana               | Drowning                                        | 0 (0 to 0) | 0 (0 to 0) | 17.5% (6.3% to 28.4%)     |
| 18 | Botswana               | Environmental heat and cold exposure            | 0 (0 to 0) | 0 (0 to 0) | -10.9% (-16.5% to -5.1%)  |
| 19 | Botswana               | Executions and police conflict                  | 0 (0 to 0) | 0 (0 to 0) | NA                        |
| 20 | Botswana               | Exposure to forces of nature                    | 0 (0 to 0) | 0 (0 to 0) | NA                        |
| 21 | Botswana               | Falls                                           | 3 (2 to 4) | 3 (2 to 5) | 17.5% (13.6% to 22.2%)    |
| 22 | Botswana               | Fire, heat, and hot substances                  | 0 (0 to 0) | 0 (0 to 0) | -3.9% (-9.3% to 2.1%)     |
| 23 | Botswana               | Foreign body in eyes                            | 0 (0 to 0) | 0 (0 to 0) | 0% (0% to 0%)             |
| 24 | Botswana               | Foreign body in other body part                 | 1 (1 to 1) | 1 (0 to 1) | -3.7% (-7.3% to 0.2%)     |
| 25 | Botswana               | Motor vehicle road injuries                     | 1 (0 to 2) | 1 (1 to 2) | 33.3% (23.4% to 44.4%)    |
| 26 | Botswana               | Motorecyclist road injuries                     | 0 (0 to 0) | 0 (0 to 0) | 1.5% (-9.4% to 11.9%)     |
| 27 | Botswana               | Non-venomous animal contact                     | 0 (0 to 1) | 0 (0 to 0) | -24.1% (-27.7% to -20.8%) |
| 28 | Botswana               | Other exposure to mechanical forces             | 0 (0 to 1) | 0 (0 to 0) | -15.5% (-20.3% to -10.7%) |
| 29 | Botswana               | Other road injuries                             | 0 (0 to 0) | 0 (0 to 0) | 30.5% (19.1% to 42.6%)    |
| 30 | Botswana               | Other transport injuries                        | 0 (0 to 1) | 0 (0 to 0) | -9% (-12.9% to -4.7%)     |
| 31 | Botswana               | Other unintentional injuries                    | 0 (0 to 0) | 0 (0 to 0) | -18.4% (-22.2% to -14%)   |
| 32 | Botswana               | Pedestrian road injuries                        | 1 (1 to 2) | 2 (1 to 3) | 12.9% (4.7% to 20.9%)     |
| 33 | Botswana               | Physical violence by firearm                    | 0 (0 to 0) | 0 (0 to 0) | 277.1% (214.3% to 364%)   |
| 34 | Botswana               | Physical violence by other means                | 0 (0 to 0) | 0 (0 to 1) | 156% (122.9% to 199.9%)   |
| 35 | Botswana               | Physical violence by sharp object               | 0 (0 to 0) | 0 (0 to 0) | 178.3% (138.9% to 223.3%) |
| 36 | Botswana               | Poisoning by carbon monoxide                    | 0 (0 to 0) | 0 (0 to 0) | 17.5% (3.4% to 33.8%)     |
| 37 | Botswana               | Poisoning by other means                        | 0 (0 to 0) | 0 (0 to 0) | -14.2% (-21.5% to -7.9%)  |
| 38 | Botswana               | Pulmonary aspiration and foreign body in airway | 0 (0 to 0) | 0 (0 to 0) | -15.2% (-21.5% to -8.3%)  |
| 39 | Botswana               | Self-harm by firearm                            | 0 (0 to 0) | 0 (0 to 0) | 31.3% (17.8% to 49.1%)    |
| 40 | Botswana               | Self-harm by other specified means              | 0 (0 to 0) | 0 (0 to 0) | 20.2% (14.1% to 25.9%)    |
| 41 | Botswana               | Unintentional firearm injuries                  | 0 (0 to 0) | 0 (0 to 0) | -17.5% (-26% to -9%)      |
| 42 | Botswana               | Venomous animal contact                         | 0 (0 to 0) | 0 (0 to 0) | -26.5% (-32.3% to -20.4%) |
| 43 | Brazil                 | Adverse effects of medical treatment            | 0 (0 to 0) | 0 (0 to 0) | 0% (0% to 0%)             |
| 44 | Brazil                 | Conflict and terrorism                          | 0 (0 to 0) | 0 (0 to 0) | NA                        |
| 45 |                        |                                                 |            |            |                           |
| 46 |                        |                                                 |            |            |                           |



|    |                   |                                                 |              |              |                           |
|----|-------------------|-------------------------------------------------|--------------|--------------|---------------------------|
| 1  |                   |                                                 |              |              |                           |
| 2  | Brazil            | Cyclist road injuries                           | 0 (0 to 1)   | 0 (0 to 0)   | -34.6% (-44.8% to -22.7%) |
| 3  | Brazil            | Drowning                                        | 0 (0 to 0)   | 0 (0 to 0)   | -39.9% (-43.8% to -35.5%) |
| 4  | Brazil            | Environmental heat and cold exposure            | 0 (0 to 1)   | 0 (0 to 1)   | -13.1% (-17.7% to -7.1%)  |
| 5  | Brazil            | Executions and police conflict                  | 0 (0 to 0)   | 0 (0 to 0)   | NA                        |
| 6  | Brazil            | Exposure to forces of nature                    | 0 (0 to 0)   | 0 (0 to 0)   | NA                        |
| 7  | Brazil            | Falls                                           | 10 (7 to 14) | 10 (7 to 14) | 0.8% (-1.7% to 3.4%)      |
| 8  | Brazil            | Fire, heat, and hot substances                  | 0 (0 to 0)   | 0 (0 to 0)   | -55.4% (-57.6% to -53%)   |
| 9  | Brazil            | Foreign body in eyes                            | 0 (0 to 0)   | 0 (0 to 0)   | 0% (0% to 0%)             |
| 10 | Brazil            | Foreign body in other body part                 | 0 (0 to 0)   | 0 (0 to 0)   | -60.6% (-64.6% to -53.7%) |
| 11 | Brazil            | Motor vehicle road injuries                     | 0 (0 to 1)   | 0 (0 to 0)   | -52.3% (-61% to -42.5%)   |
| 12 | Brazil            | Motorcyclist road injuries                      | 0 (0 to 1)   | 1 (1 to 2)   | 167.3% (121.7% to 234.5%) |
| 13 | Brazil            | Non-venomous animal contact                     | 0 (0 to 0)   | 0 (0 to 0)   | -54.8% (-57.6% to -51%)   |
| 14 | Brazil            | Other exposure to mechanical forces             | 0 (0 to 1)   | 0 (0 to 1)   | -24.2% (-28.1% to -17.6%) |
| 15 | Brazil            | Other road injuries                             | 0 (0 to 0)   | 0 (0 to 0)   | 38.7% (18.6% to 62.9%)    |
| 16 | Brazil            | Other transport injuries                        | 0 (0 to 0)   | 0 (0 to 0)   | -54.1% (-55.9% to -52.3%) |
| 17 | Brazil            | Other unintentional injuries                    | 1 (1 to 2)   | 1 (0 to 1)   | -29.5% (-32% to -26.7%)   |
| 18 | Brazil            | Pedestrian road injuries                        | 1 (1 to 3)   | 1 (0 to 1)   | -45% (-53.4% to -35.8%)   |
| 19 | Brazil            | Physical violence by firearm                    | 0 (0 to 0)   | 0 (0 to 0)   | 74.2% (42.9% to 124.6%)   |
| 20 | Brazil            | Physical violence by other means                | 0 (0 to 1)   | 0 (0 to 0)   | -38.4% (-46.7% to -30.4%) |
| 21 | Brazil            | Physical violence by sharp object               | 0 (0 to 0)   | 0 (0 to 0)   | -42.8% (-52.6% to -33.7%) |
| 22 | Brazil            | Poisoning by carbon monoxide                    | 0 (0 to 0)   | 0 (0 to 0)   | -25.7% (-38.9% to -3.2%)  |
| 23 | Brazil            | Poisoning by other means                        | 0 (0 to 0)   | 0 (0 to 0)   | -47.3% (-52.7% to -40.4%) |
| 24 | Brazil            | Pulmonary aspiration and foreign body in airway | 0 (0 to 0)   | 0 (0 to 0)   | -45.7% (-51% to -41.2%)   |
| 25 | Brazil            | Self-harm by firearm                            | 0 (0 to 0)   | 0 (0 to 0)   | 36.8% (13.3% to 73.4%)    |
| 26 | Brazil            | Self-harm by other specified means              | 0 (0 to 0)   | 0 (0 to 0)   | -39.1% (-51.4% to -28.9%) |
| 27 | Brazil            | Unintentional firearm injuries                  | 0 (0 to 0)   | 0 (0 to 0)   | -56.6% (-61.1% to -52.1%) |
| 28 | Brazil            | Venomous animal contact                         | 0 (0 to 0)   | 0 (0 to 0)   | -53.8% (-57% to -48.4%)   |
| 29 | Brunei Darussalam | Adverse effects of medical treatment            | 0 (0 to 0)   | 0 (0 to 0)   | 0% (0% to 0%)             |
| 30 | Brunei Darussalam | Conflict and terrorism                          | 0 (0 to 0)   | 0 (0 to 0)   | NA                        |
| 31 | Brunei Darussalam | Cyclist road injuries                           | 0 (0 to 1)   | 0 (0 to 0)   | -23.1% (-30.3% to -15.6%) |
| 32 | Brunei Darussalam | Drowning                                        | 0 (0 to 0)   | 0 (0 to 0)   | 35.2% (24.8% to 46.3%)    |
| 33 | Brunei Darussalam | Environmental heat and cold exposure            | 0 (0 to 0)   | 0 (0 to 0)   | 5.2% (1% to 9.3%)         |
| 34 | Brunei Darussalam | Executions and police conflict                  | 0 (0 to 0)   | 0 (0 to 0)   | NA                        |
| 35 | Brunei Darussalam | Exposure to forces of nature                    | 0 (0 to 0)   | 0 (0 to 0)   | NA                        |
| 36 | Brunei Darussalam | Falls                                           | 4 (3 to 5)   | 4 (3 to 5)   | 9.6% (5.6% to 13.7%)      |
| 37 | Brunei Darussalam | Fire, heat, and hot substances                  | 0 (0 to 0)   | 0 (0 to 0)   | -23.1% (-27.5% to -18.5%) |
| 38 | Brunei Darussalam | Foreign body in eyes                            | 0 (0 to 0)   | 0 (0 to 0)   | 0% (0% to 0%)             |
| 39 | Brunei Darussalam | Foreign body in other body part                 | 0 (0 to 1)   | 0 (0 to 1)   | 6% (2.1% to 10.5%)        |
| 40 | Brunei Darussalam | Motor vehicle road injuries                     | 1 (1 to 2)   | 1 (0 to 1)   | -46.5% (-50.9% to -42.5%) |
| 41 | Brunei Darussalam | Motorcyclist road injuries                      | 0 (0 to 0)   | 0 (0 to 0)   | -30.3% (-38.5% to -21.1%) |
| 42 | Brunei Darussalam | Non-venomous animal contact                     | 0 (0 to 0)   | 0 (0 to 0)   | -10.7% (-14.4% to -6.7%)  |
| 43 | Brunei Darussalam | Other exposure to mechanical forces             | 1 (0 to 2)   | 1 (0 to 1)   | -7.5% (-11.9% to -2.9%)   |
| 44 | Brunei Darussalam | Other road injuries                             | 0 (0 to 0)   | 0 (0 to 0)   | -32.4% (-39.4% to -25.4%) |
| 45 |                   |                                                 |              |              |                           |
| 46 |                   |                                                 |              |              |                           |

|    |                   |                                                 |            |            |                           |
|----|-------------------|-------------------------------------------------|------------|------------|---------------------------|
| 1  |                   |                                                 |            |            |                           |
| 2  | Brunei Darussalam | Other transport injuries                        | 0 (0 to 1) | 0 (0 to 0) | -51.5% (-56.6% to -44.9%) |
| 3  | Brunei Darussalam | Other unintentional injuries                    | 0 (0 to 1) | 0 (0 to 1) | -21.4% (-26.1% to -16.9%) |
| 4  | Brunei Darussalam | Pedestrian road injuries                        | 0 (0 to 0) | 0 (0 to 0) | -26.4% (-33.2% to -18.3%) |
| 5  | Brunei Darussalam | Physical violence by firearm                    | 0 (0 to 0) | 0 (0 to 0) | 60.3% (40.3% to 88.6%)    |
| 6  | Brunei Darussalam | Physical violence by other means                | 0 (0 to 0) | 0 (0 to 0) | -24.8% (-32% to -18%)     |
| 7  | Brunei Darussalam | Physical violence by sharp object               | 0 (0 to 0) | 0 (0 to 0) | -27.1% (-37.7% to -17.4%) |
| 8  | Brunei Darussalam | Poisoning by carbon monoxide                    | 0 (0 to 0) | 0 (0 to 0) | -3.8% (-12.9% to 7.4%)    |
| 9  | Brunei Darussalam | Poisoning by other means                        | 0 (0 to 0) | 0 (0 to 0) | -21.5% (-27.7% to -14.5%) |
| 10 | Brunei Darussalam | Pulmonary aspiration and foreign body in airway | 0 (0 to 0) | 0 (0 to 0) | 1.1% (-5.7% to 8%)        |
| 11 | Brunei Darussalam | Self-harm by firearm                            | 0 (0 to 0) | 0 (0 to 0) | 4.8% (-10.6% to 19.5%)    |
| 12 | Brunei Darussalam | Self-harm by other specified means              | 0 (0 to 0) | 0 (0 to 0) | 10.3% (3.3% to 17%)       |
| 13 | Brunei Darussalam | Unintentional firearm injuries                  | 0 (0 to 0) | 0 (0 to 0) | -6.7% (-13.9% to 1.1%)    |
| 14 | Brunei Darussalam | Venomous animal contact                         | 0 (0 to 0) | 0 (0 to 0) | -6.3% (-11.8% to -0.1%)   |
| 15 | Bulgaria          | Adverse effects of medical treatment            | 0 (0 to 0) | 0 (0 to 0) | 0% (0% to 0%)             |
| 16 | Bulgaria          | Conflict and terrorism                          | 0 (0 to 0) | 0 (0 to 0) | NA                        |
| 17 | Bulgaria          | Cyclist road injuries                           | 1 (0 to 1) | 1 (0 to 1) | -11.6% (-21.9% to -0.7%)  |
| 18 | Bulgaria          | Drowning                                        | 0 (0 to 0) | 0 (0 to 0) | 36.7% (19.2% to 52.7%)    |
| 19 | Bulgaria          | Environmental heat and cold exposure            | 0 (0 to 0) | 0 (0 to 0) | -10.9% (-16% to -6.2%)    |
| 20 | Bulgaria          | Executions and police conflict                  | 0 (0 to 0) | 0 (0 to 0) | NA                        |
| 21 | Bulgaria          | Exposure to forces of nature                    | 0 (0 to 0) | 0 (0 to 0) | NA                        |
| 22 | Bulgaria          | Falls                                           | 5 (4 to 7) | 5 (4 to 7) | 0.5% (-4.1% to 5%)        |
| 23 | Bulgaria          | Fire, heat, and hot substances                  | 0 (0 to 0) | 0 (0 to 0) | -7.9% (-13.5% to -2.2%)   |
| 24 | Bulgaria          | Foreign body in eyes                            | 0 (0 to 0) | 0 (0 to 0) | 0% (0% to 0%)             |
| 25 | Bulgaria          | Foreign body in other body part                 | 0 (0 to 0) | 0 (0 to 0) | -0.2% (-4.7% to 3.8%)     |
| 26 | Bulgaria          | Motor vehicle road injuries                     | 2 (1 to 3) | 2 (1 to 3) | -4.6% (-16.9% to 8.4%)    |
| 27 | Bulgaria          | Motorcyclist road injuries                      | 0 (0 to 1) | 0 (0 to 0) | -18.8% (-31.3% to -4.2%)  |
| 28 | Bulgaria          | Non-venomous animal contact                     | 0 (0 to 0) | 0 (0 to 0) | -10.3% (-13.7% to -6.6%)  |
| 29 | Bulgaria          | Other exposure to mechanical forces             | 2 (1 to 3) | 2 (1 to 3) | 9.9% (4.4% to 15.9%)      |
| 30 | Bulgaria          | Other road injuries                             | 0 (0 to 0) | 0 (0 to 0) | -13.6% (-24% to -2%)      |
| 31 | Bulgaria          | Other transport injuries                        | 0 (0 to 0) | 0 (0 to 0) | -22.6% (-27.8% to -17.4%) |
| 32 | Bulgaria          | Other unintentional injuries                    | 1 (0 to 1) | 0 (0 to 0) | -51.9% (-57.2% to -45.5%) |
| 33 | Bulgaria          | Pedestrian road injuries                        | 1 (0 to 1) | 0 (0 to 0) | -52.2% (-59.9% to -45.1%) |
| 34 | Bulgaria          | Physical violence by firearm                    | 0 (0 to 0) | 0 (0 to 0) | -14.2% (-30.3% to 2.9%)   |
| 35 | Bulgaria          | Physical violence by other means                | 1 (0 to 1) | 0 (0 to 1) | -34.6% (-43.3% to -25.3%) |
| 36 | Bulgaria          | Physical violence by sharp object               | 0 (0 to 0) | 0 (0 to 0) | -48.4% (-57.7% to -39%)   |
| 37 | Bulgaria          | Poisoning by carbon monoxide                    | 0 (0 to 0) | 0 (0 to 0) | 21.5% (4.6% to 38.2%)     |
| 38 | Bulgaria          | Poisoning by other means                        | 0 (0 to 0) | 0 (0 to 0) | -6.7% (-17.9% to 4.9%)    |
| 39 | Bulgaria          | Pulmonary aspiration and foreign body in airway | 0 (0 to 0) | 0 (0 to 0) | -24.5% (-32.7% to -16.8%) |
| 40 | Bulgaria          | Self-harm by firearm                            | 0 (0 to 0) | 0 (0 to 0) | -10.4% (-22.2% to 8.5%)   |
| 41 | Bulgaria          | Self-harm by other specified means              | 0 (0 to 1) | 0 (0 to 0) | -39.8% (-43.9% to -35.1%) |
| 42 | Bulgaria          | Unintentional firearm injuries                  | 0 (0 to 0) | 0 (0 to 0) | -5.1% (-13.9% to 3.6%)    |
| 43 | Bulgaria          | Venomous animal contact                         | 0 (0 to 0) | 0 (0 to 0) | -12.4% (-16.9% to -7.2%)  |
| 44 | Burkina Faso      | Adverse effects of medical treatment            | 0 (0 to 0) | 0 (0 to 0) | 0% (0% to 0%)             |
| 45 |                   |                                                 |            |            |                           |
| 46 |                   |                                                 |            |            |                           |

|    |              |                                                 |            |            |                           |
|----|--------------|-------------------------------------------------|------------|------------|---------------------------|
| 1  |              |                                                 |            |            |                           |
| 2  | Burkina Faso | Conflict and terrorism                          | 0 (0 to 0) | 1 (0 to 3) | NA                        |
| 3  | Burkina Faso | Cyclist road injuries                           | 1 (1 to 2) | 2 (1 to 3) | 29.5% (20.5% to 39.2%)    |
| 4  | Burkina Faso | Drowning                                        | 0 (0 to 0) | 0 (0 to 0) | -5.7% (-12% to 1.3%)      |
| 5  | Burkina Faso | Environmental heat and cold exposure            | 0 (0 to 0) | 0 (0 to 0) | -0.2% (-4.8% to 5.3%)     |
| 6  | Burkina Faso | Executions and police conflict                  | 0 (0 to 0) | 1 (0 to 1) | NA                        |
| 7  | Burkina Faso | Exposure to forces of nature                    | 0 (0 to 0) | 0 (0 to 0) | NA                        |
| 8  | Burkina Faso | Falls                                           | 3 (2 to 4) | 3 (2 to 5) | 18.7% (14.5% to 23.4%)    |
| 9  | Burkina Faso | Fire, heat, and hot substances                  | 0 (0 to 0) | 0 (0 to 0) | -2.7% (-8.2% to 2.5%)     |
| 10 | Burkina Faso | Foreign body in eyes                            | 0 (0 to 0) | 0 (0 to 0) | 0% (0% to 0%)             |
| 11 | Burkina Faso | Foreign body in other body part                 | 1 (0 to 1) | 1 (0 to 1) | -1.9% (-4.9% to 1.4%)     |
| 12 | Burkina Faso | Motor vehicle road injuries                     | 1 (1 to 3) | 2 (1 to 3) | 16.6% (7.8% to 26.8%)     |
| 13 | Burkina Faso | Motorcyclist road injuries                      | 1 (0 to 2) | 1 (1 to 2) | 38.4% (28.5% to 50%)      |
| 14 | Burkina Faso | Non-venomous animal contact                     | 0 (0 to 0) | 0 (0 to 0) | -13.7% (-17.4% to -9.5%)  |
| 15 | Burkina Faso | Other exposure to mechanical forces             | 0 (0 to 0) | 0 (0 to 0) | -2.1% (-6.8% to 3.2%)     |
| 16 | Burkina Faso | Other road injuries                             | 0 (0 to 0) | 0 (0 to 0) | 6.7% (-2% to 16.8%)       |
| 17 | Burkina Faso | Other transport injuries                        | 0 (0 to 1) | 0 (0 to 1) | -3.6% (-7.4% to 0.4%)     |
| 18 | Burkina Faso | Other unintentional injuries                    | 0 (0 to 0) | 0 (0 to 0) | -9.6% (-13.7% to -5%)     |
| 19 | Burkina Faso | Pedestrian road injuries                        | 2 (1 to 3) | 2 (1 to 4) | 5.7% (-1.2% to 12.8%)     |
| 20 | Burkina Faso | Physical violence by firearm                    | 0 (0 to 0) | 0 (0 to 0) | 25.3% (11.8% to 43.1%)    |
| 21 | Burkina Faso | Physical violence by other means                | 0 (0 to 0) | 0 (0 to 0) | 3.7% (-1.4% to 9.1%)      |
| 22 | Burkina Faso | Physical violence by sharp object               | 0 (0 to 0) | 0 (0 to 0) | 4.2% (-2.4% to 11.7%)     |
| 23 | Burkina Faso | Poisoning by carbon monoxide                    | 0 (0 to 0) | 0 (0 to 0) | 6.7% (-3.2% to 17.5%)     |
| 24 | Burkina Faso | Poisoning by other means                        | 0 (0 to 0) | 0 (0 to 0) | -14.2% (-19.9% to -8.1%)  |
| 25 | Burkina Faso | Pulmonary aspiration and foreign body in airway | 0 (0 to 0) | 0 (0 to 0) | -7.8% (-15.7% to 0%)      |
| 26 | Burkina Faso | Self-harm by firearm                            | 0 (0 to 0) | 0 (0 to 0) | 16% (3.4% to 31.6%)       |
| 27 | Burkina Faso | Self-harm by other specified means              | 0 (0 to 0) | 0 (0 to 0) | 12% (7.1% to 17%)         |
| 28 | Burkina Faso | Unintentional firearm injuries                  | 0 (0 to 0) | 0 (0 to 0) | -11.2% (-18.4% to -4.7%)  |
| 29 | Burkina Faso | Venomous animal contact                         | 0 (0 to 0) | 0 (0 to 0) | -14.2% (-20.2% to -7.7%)  |
| 30 | Burundi      | Adverse effects of medical treatment            | 0 (0 to 0) | 0 (0 to 0) | 0% (0% to 0%)             |
| 31 | Burundi      | Conflict and terrorism                          | 0 (0 to 0) | 0 (0 to 1) | NA                        |
| 32 | Burundi      | Cyclist road injuries                           | 1 (0 to 1) | 1 (0 to 1) | -19.8% (-26% to -14%)     |
| 33 | Burundi      | Drowning                                        | 0 (0 to 0) | 0 (0 to 0) | -21.9% (-27.5% to -16.2%) |
| 34 | Burundi      | Environmental heat and cold exposure            | 0 (0 to 0) | 0 (0 to 0) | -11% (-16% to -5.9%)      |
| 35 | Burundi      | Executions and police conflict                  | 0 (0 to 0) | 0 (0 to 0) | NA                        |
| 36 | Burundi      | Exposure to forces of nature                    | 0 (0 to 0) | 0 (0 to 0) | NA                        |
| 37 | Burundi      | Falls                                           | 1 (1 to 2) | 1 (1 to 2) | 5.4% (0.3% to 10.5%)      |
| 38 | Burundi      | Fire, heat, and hot substances                  | 0 (0 to 0) | 0 (0 to 0) | -17.4% (-22.1% to -12.5%) |
| 39 | Burundi      | Foreign body in eyes                            | 0 (0 to 0) | 0 (0 to 0) | 0% (0% to 0%)             |
| 40 | Burundi      | Foreign body in other body part                 | 0 (0 to 1) | 0 (0 to 1) | 1.8% (-2.5% to 6%)        |
| 41 | Burundi      | Motor vehicle road injuries                     | 1 (0 to 1) | 1 (0 to 1) | -5.5% (-12.4% to 2.2%)    |
| 42 | Burundi      | Motorcyclist road injuries                      | 0 (0 to 0) | 0 (0 to 0) | -7% (-14.4% to 0.9%)      |
| 43 | Burundi      | Non-venomous animal contact                     | 0 (0 to 1) | 0 (0 to 1) | -10.9% (-15.1% to -6.4%)  |
| 44 | Burundi      | Other exposure to mechanical forces             | 0 (0 to 0) | 0 (0 to 0) | -7.2% (-13.2% to -1%)     |
| 45 |              |                                                 |            |            |                           |
| 46 |              |                                                 |            |            |                           |

|    |            |                                                 |            |            |                           |
|----|------------|-------------------------------------------------|------------|------------|---------------------------|
| 1  |            |                                                 |            |            |                           |
| 2  | Burundi    | Other road injuries                             | 0 (0 to 0) | 0 (0 to 0) | 15.7% (6% to 26.2%)       |
| 3  | Burundi    | Other transport injuries                        | 0 (0 to 0) | 0 (0 to 0) | -9.2% (-14.1% to -4%)     |
| 4  | Burundi    | Other unintentional injuries                    | 0 (0 to 0) | 0 (0 to 0) | -23.4% (-27.5% to -19%)   |
| 5  | Burundi    | Pedestrian road injuries                        | 1 (0 to 1) | 1 (0 to 1) | -15.1% (-21.1% to -8.2%)  |
| 6  | Burundi    | Physical violence by firearm                    | 0 (0 to 0) | 0 (0 to 0) | 19.2% (8.9% to 32.9%)     |
| 7  | Burundi    | Physical violence by other means                | 0 (0 to 0) | 0 (0 to 0) | -0.4% (-6.4% to 6.4%)     |
| 8  | Burundi    | Physical violence by sharp object               | 0 (0 to 0) | 0 (0 to 0) | 0.7% (-5% to 7.3%)        |
| 9  | Burundi    | Poisoning by carbon monoxide                    | 0 (0 to 0) | 0 (0 to 0) | 9.8% (-0.3% to 21.9%)     |
| 10 | Burundi    | Poisoning by other means                        | 0 (0 to 0) | 0 (0 to 0) | -22.1% (-27.6% to -15.7%) |
| 11 | Burundi    | Pulmonary aspiration and foreign body in airway | 0 (0 to 0) | 0 (0 to 0) | -4.2% (-14.8% to 9.6%)    |
| 12 | Burundi    | Self-harm by firearm                            | 0 (0 to 0) | 0 (0 to 0) | -0.6% (-11.7% to 15%)     |
| 13 | Burundi    | Self-harm by other specified means              | 0 (0 to 0) | 0 (0 to 0) | -27.5% (-31.2% to -23.8%) |
| 14 | Burundi    | Unintentional firearm injuries                  | 0 (0 to 0) | 0 (0 to 0) | -13.6% (-20.3% to -7.8%)  |
| 15 | Burundi    | Venomous animal contact                         | 0 (0 to 0) | 0 (0 to 0) | -20.8% (-27.5% to -14.1%) |
| 16 | Cabo Verde | Adverse effects of medical treatment            | 0 (0 to 0) | 0 (0 to 0) | 0% (0% to 0%)             |
| 17 | Cabo Verde | Conflict and terrorism                          | 0 (0 to 0) | 0 (0 to 0) | NA                        |
| 18 | Cabo Verde | Cyclist road injuries                           | 1 (0 to 2) | 1 (1 to 2) | 14.3% (6% to 22.8%)       |
| 19 | Cabo Verde | Drowning                                        | 0 (0 to 0) | 0 (0 to 0) | 60.9% (46.2% to 74%)      |
| 20 | Cabo Verde | Environmental heat and cold exposure            | 0 (0 to 0) | 0 (0 to 0) | 8% (2.6% to 14.7%)        |
| 21 | Cabo Verde | Executions and police conflict                  | 0 (0 to 0) | 0 (0 to 0) | NA                        |
| 22 | Cabo Verde | Exposure to forces of nature                    | 0 (0 to 0) | 0 (0 to 0) | NA                        |
| 23 | Cabo Verde | Falls                                           | 3 (2 to 4) | 4 (3 to 5) | 46.8% (41.7% to 52.8%)    |
| 24 | Cabo Verde | Fire, heat, and hot substances                  | 0 (0 to 0) | 0 (0 to 0) | 6% (0.4% to 11.9%)        |
| 25 | Cabo Verde | Foreign body in eyes                            | 0 (0 to 0) | 0 (0 to 0) | 0% (0% to 0%)             |
| 26 | Cabo Verde | Foreign body in other body part                 | 1 (0 to 1) | 1 (0 to 1) | -2.8% (-6.1% to 0.8%)     |
| 27 | Cabo Verde | Motor vehicle road injuries                     | 1 (0 to 1) | 1 (1 to 2) | 43.2% (31.5% to 57.1%)    |
| 28 | Cabo Verde | Motorcyclist road injuries                      | 0 (0 to 1) | 1 (0 to 1) | 26.1% (16% to 36.8%)      |
| 29 | Cabo Verde | Non-venomous animal contact                     | 0 (0 to 0) | 0 (0 to 0) | -9.9% (-16.9% to -0.5%)   |
| 30 | Cabo Verde | Other exposure to mechanical forces             | 0 (0 to 0) | 0 (0 to 0) | -2.5% (-6.7% to 2.6%)     |
| 31 | Cabo Verde | Other road injuries                             | 0 (0 to 0) | 0 (0 to 0) | 2.1% (-7% to 11.9%)       |
| 32 | Cabo Verde | Other transport injuries                        | 0 (0 to 0) | 0 (0 to 1) | 8% (3.3% to 12.8%)        |
| 33 | Cabo Verde | Other unintentional injuries                    | 0 (0 to 1) | 0 (0 to 1) | -11% (-15.6% to -6.8%)    |
| 34 | Cabo Verde | Pedestrian road injuries                        | 1 (1 to 2) | 2 (1 to 3) | 27.9% (18.9% to 37.4%)    |
| 35 | Cabo Verde | Physical violence by firearm                    | 0 (0 to 0) | 0 (0 to 0) | 106.8% (86.5% to 137.2%)  |
| 36 | Cabo Verde | Physical violence by other means                | 0 (0 to 1) | 0 (0 to 1) | 11.7% (3.7% to 20.4%)     |
| 37 | Cabo Verde | Physical violence by sharp object               | 0 (0 to 0) | 0 (0 to 0) | 16.1% (6.9% to 26%)       |
| 38 | Cabo Verde | Poisoning by carbon monoxide                    | 0 (0 to 0) | 0 (0 to 0) | 28.9% (15.8% to 43.2%)    |
| 39 | Cabo Verde | Poisoning by other means                        | 0 (0 to 0) | 0 (0 to 0) | -8.8% (-14.4% to -3.2%)   |
| 40 | Cabo Verde | Pulmonary aspiration and foreign body in airway | 0 (0 to 0) | 0 (0 to 0) | -19.3% (-26.6% to -12.4%) |
| 41 | Cabo Verde | Self-harm by firearm                            | 0 (0 to 0) | 0 (0 to 0) | 31.8% (16.3% to 51.5%)    |
| 42 | Cabo Verde | Self-harm by other specified means              | 0 (0 to 0) | 0 (0 to 0) | 35.2% (26.6% to 45.7%)    |
| 43 | Cabo Verde | Unintentional firearm injuries                  | 0 (0 to 0) | 0 (0 to 0) | -10.3% (-17.4% to -3.1%)  |
| 44 | Cabo Verde | Venomous animal contact                         | 0 (0 to 0) | 0 (0 to 0) | -18.5% (-26% to -9%)      |
| 45 |            |                                                 |            |            |                           |
| 46 |            |                                                 |            |            |                           |

|    |          |                                                 |            |            |                           |
|----|----------|-------------------------------------------------|------------|------------|---------------------------|
| 1  |          |                                                 |            |            |                           |
| 2  | Cambodia | Adverse effects of medical treatment            | 0 (0 to 0) | 0 (0 to 0) | 0% (0% to 0%)             |
| 3  | Cambodia | Conflict and terrorism                          | 2 (0 to 5) | 0 (0 to 0) | NA                        |
| 4  | Cambodia | Cyclist road injuries                           | 0 (0 to 0) | 0 (0 to 0) | 12.4% (1.7% to 22.6%)     |
| 5  | Cambodia | Drowning                                        | 0 (0 to 0) | 0 (0 to 0) | -24.9% (-31.1% to -17.5%) |
| 6  | Cambodia | Environmental heat and cold exposure            | 0 (0 to 0) | 0 (0 to 0) | 5.5% (1.1% to 9.8%)       |
| 7  | Cambodia | Executions and police conflict                  | 0 (0 to 0) | 0 (0 to 0) | NA                        |
| 8  | Cambodia | Exposure to forces of nature                    | 0 (0 to 0) | 0 (0 to 0) | NA                        |
| 9  | Cambodia | Falls                                           | 2 (1 to 2) | 3 (2 to 4) | 76.5% (70.1% to 83.1%)    |
| 10 | Cambodia | Fire, heat, and hot substances                  | 0 (0 to 0) | 0 (0 to 0) | -24.5% (-30.2% to -18.5%) |
| 11 | Cambodia | Foreign body in eyes                            | 0 (0 to 0) | 0 (0 to 0) | 0% (0% to 0%)             |
| 12 | Cambodia | Foreign body in other body part                 | 0 (0 to 0) | 0 (0 to 0) | -2.5% (-6.2% to 1.6%)     |
| 13 | Cambodia | Motor vehicle road injuries                     | 0 (0 to 1) | 0 (0 to 1) | -3.8% (-11.7% to 4.9%)    |
| 14 | Cambodia | Motorcyclist road injuries                      | 1 (0 to 1) | 1 (0 to 1) | 2% (-7.2% to 12.1%)       |
| 15 | Cambodia | Non-venomous animal contact                     | 0 (0 to 0) | 0 (0 to 0) | -26.1% (-30% to -22.1%)   |
| 16 | Cambodia | Other exposure to mechanical forces             | 0 (0 to 0) | 0 (0 to 0) | -11.3% (-17.2% to -5.5%)  |
| 17 | Cambodia | Other road injuries                             | 0 (0 to 0) | 0 (0 to 0) | 6.7% (-4.3% to 18.4%)     |
| 18 | Cambodia | Other transport injuries                        | 0 (0 to 0) | 0 (0 to 0) | -18.1% (-23.3% to -12.3%) |
| 19 | Cambodia | Other unintentional injuries                    | 0 (0 to 0) | 0 (0 to 0) | 4% (-2.7% to 11.3%)       |
| 20 | Cambodia | Pedestrian road injuries                        | 0 (0 to 0) | 0 (0 to 0) | -11.1% (-19.1% to -3.4%)  |
| 21 | Cambodia | Physical violence by firearm                    | 0 (0 to 0) | 0 (0 to 0) | 21% (5.9% to 38.4%)       |
| 22 | Cambodia | Physical violence by other means                | 0 (0 to 0) | 0 (0 to 0) | -3.5% (-10.8% to 4.4%)    |
| 23 | Cambodia | Physical violence by sharp object               | 0 (0 to 0) | 0 (0 to 0) | -5.4% (-14.6% to 4.1%)    |
| 24 | Cambodia | Poisoning by carbon monoxide                    | 0 (0 to 0) | 0 (0 to 0) | 48.1% (32.2% to 65.7%)    |
| 25 | Cambodia | Poisoning by other means                        | 0 (0 to 0) | 0 (0 to 0) | -7.7% (-15.6% to -0.1%)   |
| 26 | Cambodia | Pulmonary aspiration and foreign body in airway | 0 (0 to 0) | 0 (0 to 0) | -24.9% (-31.6% to -17.2%) |
| 27 | Cambodia | Self-harm by firearm                            | 0 (0 to 0) | 0 (0 to 0) | 67.3% (43.6% to 101.6%)   |
| 28 | Cambodia | Self-harm by other specified means              | 0 (0 to 0) | 0 (0 to 0) | -15.3% (-20.3% to -9.3%)  |
| 29 | Cambodia | Unintentional firearm injuries                  | 0 (0 to 0) | 0 (0 to 0) | -13% (-20% to -6.5%)      |
| 30 | Cambodia | Venomous animal contact                         | 0 (0 to 0) | 0 (0 to 0) | -15.6% (-21.6% to -8.9%)  |
| 31 | Cameroon | Adverse effects of medical treatment            | 0 (0 to 0) | 0 (0 to 0) | 0% (0% to 0%)             |
| 32 | Cameroon | Conflict and terrorism                          | 0 (0 to 0) | 1 (0 to 2) | NA                        |
| 33 | Cameroon | Cyclist road injuries                           | 1 (1 to 3) | 2 (1 to 3) | 22% (13.7% to 31.5%)      |
| 34 | Cameroon | Drowning                                        | 0 (0 to 0) | 0 (0 to 0) | -1.4% (-8.7% to 6.1%)     |
| 35 | Cameroon | Environmental heat and cold exposure            | 0 (0 to 0) | 0 (0 to 0) | -1.6% (-6.1% to 3.7%)     |
| 36 | Cameroon | Executions and police conflict                  | 0 (0 to 0) | 0 (0 to 0) | NA                        |
| 37 | Cameroon | Exposure to forces of nature                    | 0 (0 to 0) | 0 (0 to 0) | NA                        |
| 38 | Cameroon | Falls                                           | 3 (2 to 4) | 3 (2 to 5) | 19.3% (15% to 23.6%)      |
| 39 | Cameroon | Fire, heat, and hot substances                  | 0 (0 to 0) | 0 (0 to 0) | -6.5% (-11.7% to -1.3%)   |
| 40 | Cameroon | Foreign body in eyes                            | 0 (0 to 0) | 0 (0 to 0) | 0% (0% to 0%)             |
| 41 | Cameroon | Foreign body in other body part                 | 1 (0 to 1) | 1 (0 to 1) | 4.2% (0.3% to 8.3%)       |
| 42 | Cameroon | Motor vehicle road injuries                     | 2 (1 to 4) | 2 (1 to 4) | 10.8% (2.1% to 20.4%)     |
| 43 | Cameroon | Motorcyclist road injuries                      | 2 (1 to 3) | 2 (1 to 3) | 0.8% (-6.1% to 8.4%)      |
| 44 | Cameroon | Non-venomous animal contact                     | 0 (0 to 0) | 0 (0 to 0) | -1.1% (-5.2% to 3.6%)     |
| 45 |          |                                                 |            |            |                           |
| 46 |          |                                                 |            |            |                           |

|    |          |                                                 |            |            |                           |
|----|----------|-------------------------------------------------|------------|------------|---------------------------|
| 1  |          |                                                 |            |            |                           |
| 2  | Cameroon | Other exposure to mechanical forces             | 0 (0 to 0) | 0 (0 to 0) | -13% (-18.1% to -7.7%)    |
| 3  | Cameroon | Other road injuries                             | 0 (0 to 0) | 0 (0 to 0) | 22.3% (11.7% to 33.3%)    |
| 4  | Cameroon | Other transport injuries                        | 0 (0 to 0) | 0 (0 to 0) | -5% (-9% to -0.6%)        |
| 5  | Cameroon | Other unintentional injuries                    | 0 (0 to 0) | 0 (0 to 0) | -12% (-16.6% to -6.8%)    |
| 6  | Cameroon | Pedestrian road injuries                        | 1 (1 to 3) | 1 (1 to 3) | 4% (-3.8% to 12.2%)       |
| 7  | Cameroon | Physical violence by firearm                    | 0 (0 to 0) | 0 (0 to 0) | 29.6% (13.2% to 47.8%)    |
| 8  | Cameroon | Physical violence by other means                | 0 (0 to 0) | 0 (0 to 0) | -4.1% (-9.3% to 1%)       |
| 9  | Cameroon | Physical violence by sharp object               | 0 (0 to 0) | 0 (0 to 0) | 0.9% (-6.5% to 8.8%)      |
| 10 | Cameroon | Poisoning by carbon monoxide                    | 0 (0 to 0) | 0 (0 to 0) | 14.5% (1.1% to 28.3%)     |
| 11 | Cameroon | Poisoning by other means                        | 0 (0 to 0) | 0 (0 to 0) | -15% (-22.1% to -7.4%)    |
| 12 | Cameroon | Pulmonary aspiration and foreign body in airway | 0 (0 to 0) | 0 (0 to 0) | 4.8% (-4.1% to 15%)       |
| 13 | Cameroon | Self-harm by firearm                            | 0 (0 to 0) | 0 (0 to 0) | 32.6% (19% to 48%)        |
| 14 | Cameroon | Self-harm by other specified means              | 0 (0 to 0) | 0 (0 to 0) | 26.1% (19.3% to 33.7%)    |
| 15 | Cameroon | Unintentional firearm injuries                  | 0 (0 to 0) | 0 (0 to 0) | -14.1% (-22.1% to -6.1%)  |
| 16 | Canada   | Venomous animal contact                         | 0 (0 to 0) | 0 (0 to 0) | -2.3% (-8.9% to 5.1%)     |
| 17 | Canada   | Adverse effects of medical treatment            | 0 (0 to 0) | 0 (0 to 0) | 0% (0% to 0%)             |
| 18 | Canada   | Conflict and terrorism                          | 0 (0 to 0) | 0 (0 to 0) | NA                        |
| 19 | Canada   | Cyclist road injuries                           | 0 (0 to 0) | 0 (0 to 0) | -8.8% (-22.4% to 6.9%)    |
| 20 | Canada   | Drowning                                        | 0 (0 to 0) | 0 (0 to 0) | 38% (22.9% to 56.2%)      |
| 21 | Canada   | Environmental heat and cold exposure            | 0 (0 to 0) | 0 (0 to 0) | -9.4% (-14.6% to -4.7%)   |
| 22 | Canada   | Executions and police conflict                  | 0 (0 to 0) | 0 (0 to 0) | NA                        |
| 23 | Canada   | Exposure to forces of nature                    | 0 (0 to 0) | 0 (0 to 0) | NA                        |
| 24 | Canada   | Falls                                           | 4 (3 to 6) | 6 (4 to 8) | 27% (21.7% to 32.9%)      |
| 25 | Canada   | Fire, heat, and hot substances                  | 0 (0 to 0) | 0 (0 to 0) | -17.7% (-23.6% to -12.2%) |
| 26 | Canada   | Foreign body in eyes                            | 0 (0 to 0) | 0 (0 to 0) | 0% (0% to 0%)             |
| 27 | Canada   | Foreign body in other body part                 | 0 (0 to 0) | 0 (0 to 0) | 0.8% (-2.7% to 4.5%)      |
| 28 | Canada   | Motor vehicle road injuries                     | 1 (1 to 2) | 1 (0 to 1) | -38.9% (-46.6% to -29.6%) |
| 29 | Canada   | Motorcyclist road injuries                      | 0 (0 to 0) | 0 (0 to 0) | -17.2% (-33.9% to 3.4%)   |
| 30 | Canada   | Non-venomous animal contact                     | 0 (0 to 0) | 0 (0 to 0) | -4.8% (-8.5% to -0.6%)    |
| 31 | Canada   | Other exposure to mechanical forces             | 1 (0 to 1) | 0 (0 to 1) | -16.8% (-23.8% to -10.7%) |
| 32 | Canada   | Other road injuries                             | 0 (0 to 0) | 0 (0 to 0) | 24.3% (6.3% to 46.4%)     |
| 33 | Canada   | Other transport injuries                        | 1 (0 to 1) | 1 (0 to 1) | -0.9% (-4% to 2.5%)       |
| 34 | Canada   | Other unintentional injuries                    | 0 (0 to 1) | 0 (0 to 1) | -14.3% (-18.4% to -9.7%)  |
| 35 | Canada   | Pedestrian road injuries                        | 0 (0 to 0) | 0 (0 to 0) | -18.1% (-29.6% to -3.2%)  |
| 36 | Canada   | Physical violence by firearm                    | 0 (0 to 0) | 0 (0 to 0) | 36.2% (23.7% to 50.2%)    |
| 37 | Canada   | Physical violence by other means                | 0 (0 to 0) | 0 (0 to 0) | -0.6% (-9.1% to 7.2%)     |
| 38 | Canada   | Physical violence by sharp object               | 0 (0 to 0) | 0 (0 to 0) | -4% (-14.4% to 6.3%)      |
| 39 | Canada   | Poisoning by carbon monoxide                    | 0 (0 to 0) | 0 (0 to 0) | 10.2% (1.8% to 19.1%)     |
| 40 | Canada   | Poisoning by other means                        | 0 (0 to 0) | 0 (0 to 0) | -8.1% (-12.8% to -3.9%)   |
| 41 | Canada   | Pulmonary aspiration and foreign body in airway | 0 (0 to 0) | 0 (0 to 0) | -14% (-19.9% to -8.3%)    |
| 42 | Canada   | Self-harm by firearm                            | 0 (0 to 0) | 0 (0 to 0) | -37.2% (-50.9% to -24.9%) |
| 43 | Canada   | Self-harm by other specified means              | 1 (0 to 1) | 1 (0 to 1) | 5.2% (-1.5% to 11.5%)     |
| 44 | Canada   | Unintentional firearm injuries                  | 0 (0 to 0) | 0 (0 to 0) | -2.9% (-12.8% to 8.2%)    |
| 45 |          |                                                 |            |            |                           |
| 46 |          |                                                 |            |            |                           |

|    |                          |                                                 |             |             |                           |
|----|--------------------------|-------------------------------------------------|-------------|-------------|---------------------------|
| 1  |                          |                                                 |             |             |                           |
| 2  | Canada                   | Venomous animal contact                         | 0 (0 to 0)  | 0 (0 to 0)  | -4.5% (-9.9% to 0.9%)     |
| 3  | Central African Republic | Adverse effects of medical treatment            | 0 (0 to 0)  | 0 (0 to 0)  | 0% (0% to 0%)             |
| 4  | Central African Republic | Conflict and terrorism                          | 0 (0 to 0)  | 3 (1 to 10) | NA                        |
| 5  | Central African Republic | Cyclist road injuries                           | 0 (0 to 0)  | 0 (0 to 0)  | 9.9% (2.6% to 19.5%)      |
| 6  | Central African Republic | Drowning                                        | 0 (0 to 0)  | 0 (0 to 0)  | -17.5% (-23.4% to -11%)   |
| 7  | Central African Republic | Environmental heat and cold exposure            | 0 (0 to 0)  | 0 (0 to 0)  | -3.4% (-7.6% to 1.1%)     |
| 8  | Central African Republic | Executions and police conflict                  | 0 (0 to 0)  | 0 (0 to 0)  | NA                        |
| 9  | Central African Republic | Exposure to forces of nature                    | 0 (0 to 0)  | 0 (0 to 0)  | NA                        |
| 10 | Central African Republic | Falls                                           | 1 (1 to 1)  | 1 (1 to 1)  | -2.5% (-6% to 1%)         |
| 11 | Central African Republic | Fire, heat, and hot substances                  | 0 (0 to 0)  | 0 (0 to 0)  | -8.5% (-12.6% to -4.1%)   |
| 12 | Central African Republic | Foreign body in eyes                            | 0 (0 to 0)  | 0 (0 to 0)  | 0% (0% to 0%)             |
| 13 | Central African Republic | Foreign body in other body part                 | 0 (0 to 1)  | 0 (0 to 1)  | -1.4% (-5.5% to 2.3%)     |
| 14 | Central African Republic | Motor vehicle road injuries                     | 0 (0 to 1)  | 1 (0 to 1)  | 0.6% (-6% to 8.1%)        |
| 15 | Central African Republic | Motorcyclist road injuries                      | 0 (0 to 0)  | 0 (0 to 0)  | 21% (9.9% to 33.9%)       |
| 16 | Central African Republic | Non-venomous animal contact                     | 0 (0 to 0)  | 0 (0 to 0)  | 1.6% (-3% to 6.9%)        |
| 17 | Central African Republic | Other exposure to mechanical forces             | 0 (0 to 0)  | 0 (0 to 0)  | -13.2% (-18.7% to -7.2%)  |
| 18 | Central African Republic | Other road injuries                             | 0 (0 to 0)  | 0 (0 to 0)  | 7.4% (-0.9% to 17.1%)     |
| 19 | Central African Republic | Other transport injuries                        | 0 (0 to 0)  | 0 (0 to 0)  | 1.7% (-2.4% to 5.9%)      |
| 20 | Central African Republic | Other unintentional injuries                    | 0 (0 to 0)  | 0 (0 to 0)  | -13% (-17.1% to -8.4%)    |
| 21 | Central African Republic | Pedestrian road injuries                        | 0 (0 to 1)  | 0 (0 to 1)  | -7.9% (-13.3% to -1.8%)   |
| 22 | Central African Republic | Physical violence by firearm                    | 0 (0 to 0)  | 0 (0 to 0)  | 117.4% (91.7% to 150.9%)  |
| 23 | Central African Republic | Physical violence by other means                | 0 (0 to 0)  | 0 (0 to 0)  | 126.4% (98.7% to 155.9%)  |
| 24 | Central African Republic | Physical violence by sharp object               | 0 (0 to 0)  | 0 (0 to 0)  | 156.3% (124.1% to 193.4%) |
| 25 | Central African Republic | Poisoning by carbon monoxide                    | 0 (0 to 0)  | 0 (0 to 0)  | 2.3% (-8% to 13%)         |
| 26 | Central African Republic | Poisoning by other means                        | 0 (0 to 0)  | 0 (0 to 0)  | -14.4% (-20% to -8.5%)    |
| 27 | Central African Republic | Pulmonary aspiration and foreign body in airway | 0 (0 to 0)  | 0 (0 to 0)  | -3.1% (-12.4% to 7%)      |
| 28 | Central African Republic | Self-harm by firearm                            | 0 (0 to 0)  | 0 (0 to 0)  | -5.7% (-15.4% to 5.8%)    |
| 29 | Central African Republic | Self-harm by other specified means              | 0 (0 to 0)  | 0 (0 to 0)  | -11.6% (-15.8% to -7.3%)  |
| 30 | Central African Republic | Unintentional firearm injuries                  | 0 (0 to 0)  | 0 (0 to 0)  | -5.3% (-10.9% to 1.5%)    |
| 31 | Chad                     | Venomous animal contact                         | 0 (0 to 0)  | 0 (0 to 0)  | 13.7% (6.3% to 22.5%)     |
| 32 | Chad                     | Adverse effects of medical treatment            | 0 (0 to 0)  | 0 (0 to 0)  | 0% (0% to 0%)             |
| 33 | Chad                     | Conflict and terrorism                          | 3 (1 to 11) | 1 (0 to 2)  | NA                        |
| 34 | Chad                     | Cyclist road injuries                           | 1 (0 to 2)  | 1 (1 to 2)  | 21.5% (13.8% to 30.2%)    |
| 35 | Chad                     | Drowning                                        | 0 (0 to 0)  | 0 (0 to 0)  | -7.4% (-12.9% to -1.4%)   |
| 36 | Chad                     | Environmental heat and cold exposure            | 0 (0 to 0)  | 0 (0 to 0)  | 4.9% (0.2% to 10.4%)      |
| 37 | Chad                     | Executions and police conflict                  | 0 (0 to 0)  | 0 (0 to 0)  | NA                        |
| 38 | Chad                     | Exposure to forces of nature                    | 0 (0 to 0)  | 0 (0 to 0)  | NA                        |
| 39 | Chad                     | Falls                                           | 2 (2 to 3)  | 3 (2 to 4)  | 13.1% (9.2% to 16.9%)     |
| 40 | Chad                     | Fire, heat, and hot substances                  | 0 (0 to 0)  | 0 (0 to 0)  | 5.3% (0.1% to 10.9%)      |
| 41 | Chad                     | Foreign body in eyes                            | 0 (0 to 0)  | 0 (0 to 0)  | 0% (0% to 0%)             |
| 42 | Chad                     | Foreign body in other body part                 | 1 (0 to 1)  | 1 (0 to 1)  | 1.7% (-2.1% to 6.1%)      |
| 43 | Chad                     | Motor vehicle road injuries                     | 1 (1 to 3)  | 2 (1 to 3)  | 28.4% (19.5% to 38.5%)    |
| 44 | Chad                     | Motorcyclist road injuries                      | 0 (0 to 1)  | 1 (0 to 1)  | 50.4% (38.3% to 63.4%)    |
| 45 |                          |                                                 |             |             |                           |
| 46 |                          |                                                 |             |             |                           |

|    |       |                                                 |            |            |                           |
|----|-------|-------------------------------------------------|------------|------------|---------------------------|
| 1  |       |                                                 |            |            |                           |
| 2  | Chad  | Non-venomous animal contact                     | 0 (0 to 0) | 0 (0 to 1) | 4.6% (0.6% to 9.2%)       |
| 3  | Chad  | Other exposure to mechanical forces             | 0 (0 to 0) | 0 (0 to 0) | -2% (-6.5% to 2.9%)       |
| 4  | Chad  | Other road injuries                             | 0 (0 to 0) | 0 (0 to 0) | 11.9% (4% to 20.8%)       |
| 5  | Chad  | Other transport injuries                        | 0 (0 to 0) | 0 (0 to 0) | 0.9% (-3% to 5.6%)        |
| 6  | Chad  | Other unintentional injuries                    | 0 (0 to 1) | 0 (0 to 0) | -5.8% (-9.5% to -1.5%)    |
| 7  | Chad  | Pedestrian road injuries                        | 2 (1 to 3) | 2 (1 to 4) | 16.1% (9.2% to 22.8%)     |
| 8  | Chad  | Physical violence by firearm                    | 0 (0 to 0) | 0 (0 to 0) | 28.6% (18.1% to 39.9%)    |
| 9  | Chad  | Physical violence by other means                | 0 (0 to 0) | 0 (0 to 0) | 27.7% (20.5% to 35.6%)    |
| 10 | Chad  | Physical violence by sharp object               | 0 (0 to 0) | 0 (0 to 0) | 25.6% (16.2% to 36.2%)    |
| 11 | Chad  | Poisoning by carbon monoxide                    | 0 (0 to 0) | 0 (0 to 0) | 14% (2.2% to 27.3%)       |
| 12 | Chad  | Poisoning by other means                        | 0 (0 to 0) | 0 (0 to 0) | -5.7% (-11.6% to 1.4%)    |
| 13 | Chad  | Pulmonary aspiration and foreign body in airway | 0 (0 to 0) | 0 (0 to 0) | -5.4% (-14.6% to 3.4%)    |
| 14 | Chad  | Self-harm by firearm                            | 0 (0 to 0) | 0 (0 to 0) | 24.7% (11.3% to 40.4%)    |
| 15 | Chad  | Self-harm by other specified means              | 0 (0 to 0) | 0 (0 to 0) | 20.7% (15.7% to 26.8%)    |
| 16 | Chad  | Unintentional firearm injuries                  | 0 (0 to 0) | 0 (0 to 0) | -12.8% (-19% to -6.8%)    |
| 17 | Chad  | Venomous animal contact                         | 0 (0 to 0) | 0 (0 to 0) | 6.6% (-0.4% to 14%)       |
| 18 | Chile | Adverse effects of medical treatment            | 0 (0 to 0) | 0 (0 to 0) | 0% (0% to 0%)             |
| 19 | Chile | Conflict and terrorism                          | 0 (0 to 0) | 0 (0 to 0) | NA                        |
| 20 | Chile | Cyclist road injuries                           | 0 (0 to 0) | 0 (0 to 0) | 20% (7.7% to 35.7%)       |
| 21 | Chile | Drowning                                        | 0 (0 to 0) | 0 (0 to 0) | 82.6% (59.2% to 107%)     |
| 22 | Chile | Environmental heat and cold exposure            | 0 (0 to 0) | 0 (0 to 0) | -16.8% (-22.3% to -11.9%) |
| 23 | Chile | Executions and police conflict                  | 0 (0 to 0) | 0 (0 to 0) | NA                        |
| 24 | Chile | Exposure to forces of nature                    | 0 (0 to 0) | 0 (0 to 0) | NA                        |
| 25 | Chile | Falls                                           | 3 (2 to 4) | 4 (3 to 6) | 29.9% (25.5% to 34.3%)    |
| 26 | Chile | Fire, heat, and hot substances                  | 0 (0 to 0) | 0 (0 to 0) | -28% (-34.9% to -21.6%)   |
| 27 | Chile | Foreign body in eyes                            | 0 (0 to 0) | 0 (0 to 0) | 0% (0% to 0%)             |
| 28 | Chile | Foreign body in other body part                 | 0 (0 to 0) | 0 (0 to 0) | 3.3% (0.2% to 7.2%)       |
| 29 | Chile | Motor vehicle road injuries                     | 1 (0 to 1) | 1 (0 to 1) | 0.7% (-8.9% to 11.5%)     |
| 30 | Chile | Motorcyclist road injuries                      | 0 (0 to 0) | 0 (0 to 0) | 66.8% (44.8% to 93.2%)    |
| 31 | Chile | Non-venomous animal contact                     | 0 (0 to 0) | 0 (0 to 0) | -19.2% (-22.2% to -15.8%) |
| 32 | Chile | Other exposure to mechanical forces             | 1 (0 to 2) | 1 (0 to 2) | 6.2% (-0.8% to 13.8%)     |
| 33 | Chile | Other road injuries                             | 0 (0 to 0) | 0 (0 to 0) | 7.3% (-4% to 21.1%)       |
| 34 | Chile | Other transport injuries                        | 0 (0 to 0) | 0 (0 to 0) | -8.4% (-14% to -3.4%)     |
| 35 | Chile | Other unintentional injuries                    | 0 (0 to 1) | 0 (0 to 0) | -12.7% (-18.8% to -6.4%)  |
| 36 | Chile | Pedestrian road injuries                        | 0 (0 to 0) | 0 (0 to 0) | -24.7% (-32.6% to -15.5%) |
| 37 | Chile | Physical violence by firearm                    | 0 (0 to 0) | 0 (0 to 0) | 181.5% (125.5% to 266.5%) |
| 38 | Chile | Physical violence by other means                | 0 (0 to 1) | 0 (0 to 0) | -44.3% (-56.2% to -31.8%) |
| 39 | Chile | Physical violence by sharp object               | 0 (0 to 0) | 0 (0 to 0) | 43% (15.1% to 82.5%)      |
| 40 | Chile | Poisoning by carbon monoxide                    | 0 (0 to 0) | 0 (0 to 0) | 36.7% (23.7% to 49.2%)    |
| 41 | Chile | Poisoning by other means                        | 0 (0 to 0) | 0 (0 to 0) | 7.2% (-0.6% to 14.7%)     |
| 42 | Chile | Pulmonary aspiration and foreign body in airway | 0 (0 to 0) | 0 (0 to 0) | -55.3% (-62.8% to -46.2%) |
| 43 | Chile | Self-harm by firearm                            | 0 (0 to 0) | 0 (0 to 0) | -36.2% (-47.7% to -25%)   |
| 44 | Chile | Self-harm by other specified means              | 0 (0 to 1) | 0 (0 to 0) | -13.8% (-18.5% to -8.9%)  |
| 45 |       |                                                 |            |            |                           |
| 46 |       |                                                 |            |            |                           |



|    |          |                                                 |            |             |                           |
|----|----------|-------------------------------------------------|------------|-------------|---------------------------|
| 1  |          |                                                 |            |             |                           |
| 2  | Chile    | Unintentional firearm injuries                  | 0 (0 to 0) | 0 (0 to 0)  | -13.4% (-24.8% to -3.5%)  |
| 3  | Chile    | Venomous animal contact                         | 0 (0 to 0) | 0 (0 to 0)  | -22.6% (-26.8% to -18.1%) |
| 4  | China    | Adverse effects of medical treatment            | 0 (0 to 0) | 0 (0 to 0)  | 0% (0% to 0%)             |
| 5  | China    | Conflict and terrorism                          | 0 (0 to 0) | 0 (0 to 0)  | NA                        |
| 6  | China    | Cyclist road injuries                           | 0 (0 to 1) | 1 (0 to 2)  | 101% (91% to 112.4%)      |
| 7  | China    | Drowning                                        | 0 (0 to 0) | 0 (0 to 0)  | 9.1% (-10.8% to 28.7%)    |
| 8  | China    | Environmental heat and cold exposure            | 0 (0 to 0) | 0 (0 to 0)  | -17.2% (-22.1% to -12.3%) |
| 9  | China    | Executions and police conflict                  | 0 (0 to 0) | 0 (0 to 0)  | NA                        |
| 10 | China    | Exposure to forces of nature                    | 0 (0 to 0) | 0 (0 to 0)  | NA                        |
| 11 | China    | Falls                                           | 6 (4 to 9) | 9 (6 to 13) | 41.5% (34.6% to 48.4%)    |
| 12 | China    | Fire, heat, and hot substances                  | 0 (0 to 0) | 0 (0 to 0)  | 9.5% (3.5% to 14.7%)      |
| 13 | China    | Foreign body in eyes                            | 0 (0 to 0) | 0 (0 to 0)  | 0% (0% to 0%)             |
| 14 | China    | Foreign body in other body part                 | 0 (0 to 1) | 0 (0 to 0)  | -35.7% (-40.5% to -30.4%) |
| 15 | China    | Motor vehicle road injuries                     | 0 (0 to 1) | 1 (0 to 1)  | 125.5% (114.4% to 139.4%) |
| 16 | China    | Motorcyclist road injuries                      | 1 (0 to 1) | 1 (0 to 2)  | 114.6% (102.4% to 128.5%) |
| 17 | China    | Non-venomous animal contact                     | 0 (0 to 0) | 0 (0 to 0)  | -40.8% (-43.2% to -38.4%) |
| 18 | China    | Other exposure to mechanical forces             | 0 (0 to 0) | 0 (0 to 0)  | 91% (74.2% to 115.1%)     |
| 19 | China    | Other road injuries                             | 0 (0 to 0) | 0 (0 to 0)  | 94.1% (83.3% to 106.1%)   |
| 20 | China    | Other transport injuries                        | 0 (0 to 1) | 0 (0 to 0)  | -23.9% (-28.7% to -18.8%) |
| 21 | China    | Other unintentional injuries                    | 0 (0 to 0) | 0 (0 to 0)  | -14.9% (-19.5% to -9.6%)  |
| 22 | China    | Pedestrian road injuries                        | 1 (0 to 1) | 1 (1 to 2)  | 59.8% (50.4% to 68.6%)    |
| 23 | China    | Physical violence by firearm                    | 0 (0 to 0) | 0 (0 to 0)  | 26.2% (2.5% to 47.2%)     |
| 24 | China    | Physical violence by other means                | 0 (0 to 1) | 0 (0 to 1)  | -6% (-11.2% to -0.9%)     |
| 25 | China    | Physical violence by sharp object               | 0 (0 to 0) | 0 (0 to 0)  | -29% (-36.8% to -22.3%)   |
| 26 | China    | Poisoning by carbon monoxide                    | 0 (0 to 0) | 0 (0 to 0)  | 53.5% (41.6% to 66.2%)    |
| 27 | China    | Poisoning by other means                        | 0 (0 to 0) | 0 (0 to 0)  | -0.9% (-6.6% to 4.5%)     |
| 28 | China    | Pulmonary aspiration and foreign body in airway | 0 (0 to 0) | 0 (0 to 0)  | -24.9% (-32.4% to -15.8%) |
| 29 | China    | Self-harm by firearm                            | 0 (0 to 0) | 0 (0 to 0)  | -8.3% (-27.7% to 25.6%)   |
| 30 | China    | Self-harm by other specified means              | 0 (0 to 0) | 0 (0 to 0)  | -63.6% (-70.8% to -55.8%) |
| 31 | China    | Unintentional firearm injuries                  | 0 (0 to 0) | 0 (0 to 0)  | -11.4% (-22.9% to -0.2%)  |
| 32 | China    | Venomous animal contact                         | 0 (0 to 0) | 0 (0 to 0)  | -49% (-53.3% to -43%)     |
| 33 | Colombia | Adverse effects of medical treatment            | 0 (0 to 0) | 0 (0 to 0)  | 0% (0% to 0%)             |
| 34 | Colombia | Conflict and terrorism                          | 2 (0 to 6) | 0 (0 to 0)  | NA                        |
| 35 | Colombia | Cyclist road injuries                           | 0 (0 to 1) | 0 (0 to 0)  | -12.2% (-23.5% to 1.1%)   |
| 36 | Colombia | Drowning                                        | 0 (0 to 0) | 0 (0 to 0)  | 66.6% (45.9% to 89.1%)    |
| 37 | Colombia | Environmental heat and cold exposure            | 0 (0 to 0) | 0 (0 to 0)  | -6.3% (-11.5% to -0.4%)   |
| 38 | Colombia | Executions and police conflict                  | 0 (0 to 0) | 0 (0 to 0)  | NA                        |
| 39 | Colombia | Exposure to forces of nature                    | 0 (0 to 0) | 0 (0 to 0)  | NA                        |
| 40 | Colombia | Falls                                           | 2 (2 to 3) | 2 (1 to 3)  | -16.3% (-21.6% to -10.9%) |
| 41 | Colombia | Fire, heat, and hot substances                  | 0 (0 to 0) | 0 (0 to 0)  | -26.3% (-34% to -18.3%)   |
| 42 | Colombia | Foreign body in eyes                            | 0 (0 to 0) | 0 (0 to 0)  | 0% (0% to 0%)             |
| 43 | Colombia | Foreign body in other body part                 | 0 (0 to 0) | 0 (0 to 0)  | -3.8% (-7.5% to 0.2%)     |
| 44 | Colombia | Motor vehicle road injuries                     | 1 (0 to 1) | 1 (0 to 1)  | -32.8% (-40.9% to -23.5%) |
| 45 |          |                                                 |            |             |                           |
| 46 |          |                                                 |            |             |                           |

|    |          |                                                 |            |            |                           |
|----|----------|-------------------------------------------------|------------|------------|---------------------------|
| 1  |          |                                                 |            |            |                           |
| 2  | Colombia | Motorcyclist road injuries                      | 0 (0 to 0) | 0 (0 to 1) | 100.5% (73.5% to 134.4%)  |
| 3  | Colombia | Non-venomous animal contact                     | 0 (0 to 0) | 0 (0 to 0) | -26.4% (-31.6% to -20.7%) |
| 4  | Colombia | Other exposure to mechanical forces             | 0 (0 to 1) | 0 (0 to 1) | -17.2% (-24.1% to -8.5%)  |
| 5  | Colombia | Other road injuries                             | 0 (0 to 0) | 0 (0 to 0) | -17.7% (-29% to -4.3%)    |
| 6  | Colombia | Other transport injuries                        | 0 (0 to 0) | 0 (0 to 0) | -9.7% (-13.4% to -5.5%)   |
| 7  | Colombia | Other unintentional injuries                    | 0 (0 to 0) | 0 (0 to 0) | -38.4% (-44.4% to -31.3%) |
| 8  | Colombia | Pedestrian road injuries                        | 1 (0 to 1) | 0 (0 to 0) | -57.7% (-63.7% to -51.3%) |
| 9  | Colombia | Physical violence by firearm                    | 1 (0 to 1) | 0 (0 to 1) | -37.3% (-66.5% to -14.1%) |
| 10 | Colombia | Physical violence by other means                | 0 (0 to 1) | 0 (0 to 0) | -48.3% (-65.6% to -36.5%) |
| 11 | Colombia | Physical violence by sharp object               | 1 (0 to 1) | 0 (0 to 1) | -50.3% (-70.6% to -34.1%) |
| 12 | Colombia | Poisoning by carbon monoxide                    | 0 (0 to 0) | 0 (0 to 0) | 32.9% (15.6% to 49.8%)    |
| 13 | Colombia | Poisoning by other means                        | 0 (0 to 0) | 0 (0 to 0) | -15.5% (-24.6% to -6.6%)  |
| 14 | Colombia | Pulmonary aspiration and foreign body in airway | 0 (0 to 0) | 0 (0 to 0) | -20.8% (-28.9% to -12.9%) |
| 15 | Colombia | Self-harm by firearm                            | 0 (0 to 0) | 0 (0 to 0) | 3.8% (-14.1% to 19.1%)    |
| 16 | Colombia | Self-harm by other specified means              | 0 (0 to 0) | 0 (0 to 0) | 51.6% (39.1% to 68%)      |
| 17 | Colombia | Unintentional firearm injuries                  | 0 (0 to 0) | 0 (0 to 0) | -30.1% (-39.4% to -22.1%) |
| 18 | Colombia | Venomous animal contact                         | 0 (0 to 0) | 0 (0 to 0) | -35.1% (-41.4% to -29.6%) |
| 19 | Comoros  | Adverse effects of medical treatment            | 0 (0 to 0) | 0 (0 to 0) | 0% (0% to 0%)             |
| 20 | Comoros  | Conflict and terrorism                          | 0 (0 to 0) | 0 (0 to 0) | NA                        |
| 21 | Comoros  | Cyclist road injuries                           | 2 (1 to 3) | 2 (1 to 4) | 15.4% (7.1% to 25.3%)     |
| 22 | Comoros  | Drowning                                        | 0 (0 to 0) | 0 (0 to 0) | -13.8% (-21% to -6.4%)    |
| 23 | Comoros  | Environmental heat and cold exposure            | 0 (0 to 0) | 0 (0 to 0) | -11.6% (-16.9% to -5.9%)  |
| 24 | Comoros  | Executions and police conflict                  | 0 (0 to 0) | 0 (0 to 0) | NA                        |
| 25 | Comoros  | Exposure to forces of nature                    | 0 (0 to 0) | 0 (0 to 0) | NA                        |
| 26 | Comoros  | Falls                                           | 3 (2 to 4) | 3 (2 to 5) | 23.2% (18.8% to 27.4%)    |
| 27 | Comoros  | Fire, heat, and hot substances                  | 0 (0 to 0) | 0 (0 to 0) | -17.8% (-22.6% to -13%)   |
| 28 | Comoros  | Foreign body in eyes                            | 0 (0 to 0) | 0 (0 to 0) | 0% (0% to 0%)             |
| 29 | Comoros  | Foreign body in other body part                 | 1 (0 to 1) | 1 (0 to 1) | 3.5% (-0.5% to 7.9%)      |
| 30 | Comoros  | Motor vehicle road injuries                     | 3 (1 to 5) | 3 (1 to 5) | 0.4% (-7.4% to 8.8%)      |
| 31 | Comoros  | Motorcyclist road injuries                      | 1 (0 to 2) | 1 (0 to 2) | -9.1% (-17.1% to -0.9%)   |
| 32 | Comoros  | Non-venomous animal contact                     | 1 (0 to 1) | 0 (0 to 1) | -18.5% (-23% to -13.4%)   |
| 33 | Comoros  | Other exposure to mechanical forces             | 0 (0 to 1) | 0 (0 to 1) | -16.7% (-21.3% to -11.2%) |
| 34 | Comoros  | Other road injuries                             | 0 (0 to 0) | 0 (0 to 0) | 23.7% (12.5% to 36.2%)    |
| 35 | Comoros  | Other transport injuries                        | 0 (0 to 1) | 0 (0 to 1) | -7.6% (-12.2% to -2.9%)   |
| 36 | Comoros  | Other unintentional injuries                    | 0 (0 to 1) | 0 (0 to 0) | -17.5% (-22.3% to -12.4%) |
| 37 | Comoros  | Pedestrian road injuries                        | 2 (1 to 4) | 2 (1 to 3) | -13.7% (-20.6% to -6.3%)  |
| 38 | Comoros  | Physical violence by firearm                    | 0 (0 to 0) | 0 (0 to 0) | 48.5% (32.3% to 65.4%)    |
| 39 | Comoros  | Physical violence by other means                | 0 (0 to 0) | 0 (0 to 0) | 25.2% (17.5% to 33.3%)    |
| 40 | Comoros  | Physical violence by sharp object               | 0 (0 to 0) | 0 (0 to 0) | 25.6% (16.2% to 35.6%)    |
| 41 | Comoros  | Poisoning by carbon monoxide                    | 0 (0 to 0) | 0 (0 to 0) | 22.3% (9% to 38.4%)       |
| 42 | Comoros  | Poisoning by other means                        | 0 (0 to 0) | 0 (0 to 0) | -24.5% (-30.7% to -16.4%) |
| 43 | Comoros  | Pulmonary aspiration and foreign body in airway | 0 (0 to 0) | 0 (0 to 0) | -6.7% (-16.1% to 4%)      |
| 44 | Comoros  | Self-harm by firearm                            | 0 (0 to 0) | 0 (0 to 0) | 25.5% (12.2% to 43.2%)    |
| 45 |          |                                                 |            |            |                           |
| 46 |          |                                                 |            |            |                           |

|    |              |                                                 |            |            |                           |
|----|--------------|-------------------------------------------------|------------|------------|---------------------------|
| 1  |              |                                                 |            |            |                           |
| 2  | Comoros      | Self-harm by other specified means              | 0 (0 to 0) | 0 (0 to 0) | 7.7% (2.7% to 12.6%)      |
| 3  | Comoros      | Unintentional firearm injuries                  | 0 (0 to 0) | 0 (0 to 0) | -21% (-27.6% to -13.1%)   |
| 4  | Comoros      | Venomous animal contact                         | 0 (0 to 0) | 0 (0 to 0) | -36.4% (-43.5% to -30.1%) |
| 5  | Congo        | Adverse effects of medical treatment            | 0 (0 to 0) | 0 (0 to 0) | 0% (0% to 0%)             |
| 6  | Congo        | Conflict and terrorism                          | 0 (0 to 0) | 0 (0 to 0) | NA                        |
| 7  | Congo        | Cyclist road injuries                           | 0 (0 to 0) | 0 (0 to 0) | 4.7% (-3% to 13.7%)       |
| 8  | Congo        | Drowning                                        | 0 (0 to 0) | 0 (0 to 0) | -26.8% (-33.2% to -19.7%) |
| 9  | Congo        | Environmental heat and cold exposure            | 0 (0 to 0) | 0 (0 to 0) | -7.9% (-13% to -2.5%)     |
| 10 | Congo        | Executions and police conflict                  | 0 (0 to 0) | 0 (0 to 0) | NA                        |
| 11 | Congo        | Exposure to forces of nature                    | 0 (0 to 0) | 0 (0 to 0) | NA                        |
| 12 | Congo        | Falls                                           | 1 (1 to 1) | 1 (1 to 1) | 12.4% (8.9% to 16.2%)     |
| 13 | Congo        | Fire, heat, and hot substances                  | 0 (0 to 0) | 0 (0 to 0) | -18.5% (-23.9% to -13.5%) |
| 14 | Congo        | Foreign body in eyes                            | 0 (0 to 0) | 0 (0 to 0) | 0% (0% to 0%)             |
| 15 | Congo        | Foreign body in other body part                 | 0 (0 to 1) | 0 (0 to 1) | -2.6% (-6.3% to 1.7%)     |
| 16 | Congo        | Motor vehicle road injuries                     | 1 (0 to 1) | 1 (0 to 1) | -6% (-11.7% to 0.9%)      |
| 17 | Congo        | Motorcyclist road injuries                      | 0 (0 to 0) | 0 (0 to 0) | -25.2% (-32.9% to -17.5%) |
| 18 | Congo        | Non-venomous animal contact                     | 0 (0 to 0) | 0 (0 to 0) | -10% (-14.2% to -5.4%)    |
| 19 | Congo        | Other exposure to mechanical forces             | 0 (0 to 0) | 0 (0 to 0) | -15.5% (-21.3% to -9.9%)  |
| 20 | Congo        | Other road injuries                             | 0 (0 to 0) | 0 (0 to 0) | 7.7% (-2.2% to 17.6%)     |
| 21 | Congo        | Other transport injuries                        | 0 (0 to 0) | 0 (0 to 0) | -19.2% (-24.3% to -14.3%) |
| 22 | Congo        | Other unintentional injuries                    | 0 (0 to 0) | 0 (0 to 0) | -13.9% (-20.1% to -8.1%)  |
| 23 | Congo        | Pedestrian road injuries                        | 1 (0 to 1) | 0 (0 to 1) | -20.6% (-26.5% to -14.9%) |
| 24 | Congo        | Physical violence by firearm                    | 0 (0 to 0) | 0 (0 to 0) | 2.4% (-7.7% to 14%)       |
| 25 | Congo        | Physical violence by other means                | 0 (0 to 0) | 0 (0 to 0) | -17.5% (-23% to -11.8%)   |
| 26 | Congo        | Physical violence by sharp object               | 0 (0 to 0) | 0 (0 to 0) | -17.8% (-23.4% to -11.6%) |
| 27 | Congo        | Poisoning by carbon monoxide                    | 0 (0 to 0) | 0 (0 to 0) | 13.8% (0.8% to 26.4%)     |
| 28 | Congo        | Poisoning by other means                        | 0 (0 to 0) | 0 (0 to 0) | -20.4% (-27.2% to -12.9%) |
| 29 | Congo        | Pulmonary aspiration and foreign body in airway | 0 (0 to 0) | 0 (0 to 0) | -22.7% (-29.9% to -14.4%) |
| 30 | Congo        | Self-harm by firearm                            | 0 (0 to 0) | 0 (0 to 0) | -6.3% (-16.8% to 7.8%)    |
| 31 | Congo        | Self-harm by other specified means              | 0 (0 to 0) | 0 (0 to 0) | -24.4% (-28.5% to -20.5%) |
| 32 | Congo        | Unintentional firearm injuries                  | 0 (0 to 0) | 0 (0 to 0) | -13.8% (-20.2% to -7.4%)  |
| 33 | Congo        | Venomous animal contact                         | 0 (0 to 0) | 0 (0 to 0) | -4.3% (-10.9% to 4%)      |
| 34 | Cook Islands | Adverse effects of medical treatment            | 0 (0 to 0) | 0 (0 to 0) | 0% (0% to 0%)             |
| 35 | Cook Islands | Conflict and terrorism                          | 0 (0 to 0) | 0 (0 to 0) | NA                        |
| 36 | Cook Islands | Cyclist road injuries                           | 1 (0 to 1) | 1 (0 to 1) | -13.9% (-20.4% to -5.6%)  |
| 37 | Cook Islands | Drowning                                        | 0 (0 to 0) | 0 (0 to 0) | 31.4% (19.1% to 43.9%)    |
| 38 | Cook Islands | Environmental heat and cold exposure            | 0 (0 to 0) | 0 (0 to 0) | 1.9% (-3.2% to 6.4%)      |
| 39 | Cook Islands | Executions and police conflict                  | 0 (0 to 0) | 0 (0 to 0) | NA                        |
| 40 | Cook Islands | Exposure to forces of nature                    | 2 (1 to 5) | 0 (0 to 0) | NA                        |
| 41 | Cook Islands | Falls                                           | 4 (3 to 6) | 6 (4 to 9) | 49.9% (45.1% to 54.9%)    |
| 42 | Cook Islands | Fire, heat, and hot substances                  | 0 (0 to 0) | 0 (0 to 0) | 10.2% (5.3% to 16.2%)     |
| 43 | Cook Islands | Foreign body in eyes                            | 0 (0 to 0) | 0 (0 to 0) | 0% (0% to 0%)             |
| 44 | Cook Islands | Foreign body in other body part                 | 0 (0 to 0) | 0 (0 to 0) | -2.3% (-6.5% to 2.7%)     |
| 45 |              |                                                 |            |            |                           |
| 46 |              |                                                 |            |            |                           |

|    |              |                                                 |            |            |                           |
|----|--------------|-------------------------------------------------|------------|------------|---------------------------|
| 1  |              |                                                 |            |            |                           |
| 2  | Cook Islands | Motor vehicle road injuries                     | 2 (1 to 3) | 1 (1 to 2) | -26.6% (-32.4% to -21%)   |
| 3  | Cook Islands | Motorcyclist road injuries                      | 1 (1 to 2) | 1 (0 to 2) | -17.1% (-23.3% to -9.3%)  |
| 4  | Cook Islands | Non-venomous animal contact                     | 0 (0 to 0) | 0 (0 to 0) | -15.9% (-19.8% to -12.1%) |
| 5  | Cook Islands | Other exposure to mechanical forces             | 0 (0 to 0) | 0 (0 to 0) | -2% (-7.2% to 2.1%)       |
| 6  | Cook Islands | Other road injuries                             | 0 (0 to 0) | 0 (0 to 0) | -22% (-29.6% to -13.7%)   |
| 7  | Cook Islands | Other transport injuries                        | 0 (0 to 1) | 0 (0 to 1) | -4.6% (-9% to 0%)         |
| 8  | Cook Islands | Other unintentional injuries                    | 0 (0 to 0) | 0 (0 to 0) | 4.4% (-0.4% to 8.2%)      |
| 9  | Cook Islands | Pedestrian road injuries                        | 1 (0 to 2) | 1 (0 to 1) | -25.9% (-32.1% to -19.7%) |
| 10 | Cook Islands | Physical violence by firearm                    | 0 (0 to 0) | 0 (0 to 0) | 27% (10.2% to 45.2%)      |
| 11 | Cook Islands | Physical violence by other means                | 0 (0 to 1) | 0 (0 to 1) | -18.2% (-23.4% to -12.9%) |
| 12 | Cook Islands | Physical violence by sharp object               | 0 (0 to 0) | 0 (0 to 0) | -27% (-36.5% to -17.7%)   |
| 13 | Cook Islands | Poisoning by carbon monoxide                    | 0 (0 to 0) | 0 (0 to 0) | 21.4% (11.7% to 32.2%)    |
| 14 | Cook Islands | Poisoning by other means                        | 0 (0 to 0) | 0 (0 to 0) | -9.5% (-16.9% to -2.9%)   |
| 15 | Cook Islands | Pulmonary aspiration and foreign body in airway | 0 (0 to 0) | 0 (0 to 0) | -4.7% (-13.9% to 5.7%)    |
| 16 | Cook Islands | Self-harm by firearm                            | 0 (0 to 0) | 0 (0 to 0) | 0.2% (-11.6% to 15.6%)    |
| 17 | Cook Islands | Self-harm by other specified means              | 0 (0 to 0) | 0 (0 to 0) | -20.2% (-25.6% to -14.1%) |
| 18 | Cook Islands | Unintentional firearm injuries                  | 0 (0 to 0) | 0 (0 to 0) | 3.4% (-4.7% to 11.7%)     |
| 19 | Costa Rica   | Venomous animal contact                         | 0 (0 to 0) | 0 (0 to 0) | -11.6% (-17.8% to -5.4%)  |
| 20 | Costa Rica   | Adverse effects of medical treatment            | 0 (0 to 0) | 0 (0 to 0) | 0% (0% to 0%)             |
| 21 | Costa Rica   | Conflict and terrorism                          | 0 (0 to 0) | 0 (0 to 0) | NA                        |
| 22 | Costa Rica   | Cyclist road injuries                           | 0 (0 to 0) | 0 (0 to 0) | -32.2% (-41.3% to -23.6%) |
| 23 | Costa Rica   | Drowning                                        | 0 (0 to 0) | 0 (0 to 0) | -0.2% (-11.2% to 10.5%)   |
| 24 | Costa Rica   | Environmental heat and cold exposure            | 0 (0 to 0) | 0 (0 to 0) | 4.4% (-0.9% to 8.8%)      |
| 25 | Costa Rica   | Executions and police conflict                  | 0 (0 to 0) | 0 (0 to 0) | NA                        |
| 26 | Costa Rica   | Exposure to forces of nature                    | 0 (0 to 0) | 0 (0 to 0) | NA                        |
| 27 | Costa Rica   | Falls                                           | 3 (2 to 4) | 3 (2 to 4) | -3.1% (-7.2% to 0.7%)     |
| 28 | Costa Rica   | Fire, heat, and hot substances                  | 0 (0 to 0) | 0 (0 to 0) | -7.2% (-14.1% to -0.7%)   |
| 29 | Costa Rica   | Foreign body in eyes                            | 0 (0 to 0) | 0 (0 to 0) | 0% (0% to 0%)             |
| 30 | Costa Rica   | Foreign body in other body part                 | 0 (0 to 0) | 0 (0 to 0) | -6.5% (-10.5% to -2.3%)   |
| 31 | Costa Rica   | Motor vehicle road injuries                     | 1 (0 to 1) | 1 (0 to 1) | -4% (-13.9% to 5.8%)      |
| 32 | Costa Rica   | Motorcyclist road injuries                      | 0 (0 to 0) | 0 (0 to 0) | 37.8% (20.5% to 58%)      |
| 33 | Costa Rica   | Non-venomous animal contact                     | 0 (0 to 0) | 0 (0 to 0) | -19.1% (-22.8% to -15.3%) |
| 34 | Costa Rica   | Other exposure to mechanical forces             | 0 (0 to 1) | 0 (0 to 1) | -0.2% (-7.4% to 6.3%)     |
| 35 | Costa Rica   | Other road injuries                             | 0 (0 to 0) | 0 (0 to 0) | -2.9% (-14.7% to 10.2%)   |
| 36 | Costa Rica   | Other transport injuries                        | 0 (0 to 0) | 0 (0 to 0) | 22.5% (14.9% to 29.9%)    |
| 37 | Costa Rica   | Other unintentional injuries                    | 0 (0 to 0) | 0 (0 to 0) | -5.4% (-9.7% to -0.3%)    |
| 38 | Costa Rica   | Pedestrian road injuries                        | 0 (0 to 1) | 0 (0 to 1) | -16.3% (-26% to -6.5%)    |
| 39 | Costa Rica   | Physical violence by firearm                    | 0 (0 to 0) | 0 (0 to 0) | 215.1% (158.3% to 302.8%) |
| 40 | Costa Rica   | Physical violence by other means                | 0 (0 to 0) | 0 (0 to 0) | 24.3% (7.6% to 41.5%)     |
| 41 | Costa Rica   | Physical violence by sharp object               | 0 (0 to 0) | 0 (0 to 0) | 25.8% (2.8% to 48.4%)     |
| 42 | Costa Rica   | Poisoning by carbon monoxide                    | 0 (0 to 0) | 0 (0 to 0) | 14.6% (4.9% to 25.4%)     |
| 43 | Costa Rica   | Poisoning by other means                        | 0 (0 to 0) | 0 (0 to 0) | -3.1% (-9.9% to 3.6%)     |
| 44 | Costa Rica   | Pulmonary aspiration and foreign body in airway | 0 (0 to 0) | 0 (0 to 0) | -23% (-30.5% to -15%)     |
| 45 |              |                                                 |            |            |                           |
| 46 |              |                                                 |            |            |                           |

|    |            |                                                 |             |              |                           |
|----|------------|-------------------------------------------------|-------------|--------------|---------------------------|
| 1  |            |                                                 |             |              |                           |
| 2  | Costa Rica | Self-harm by firearm                            | 0 (0 to 0)  | 0 (0 to 0)   | 4.3% (-7.7% to 15%)       |
| 3  | Costa Rica | Self-harm by other specified means              | 0 (0 to 0)  | 0 (0 to 0)   | 21.5% (14.1% to 30.6%)    |
| 4  | Costa Rica | Unintentional firearm injuries                  | 0 (0 to 0)  | 0 (0 to 0)   | 11% (2.9% to 19.9%)       |
| 5  | Costa Rica | Venomous animal contact                         | 0 (0 to 0)  | 0 (0 to 0)   | -15.7% (-20.1% to -11.1%) |
| 6  | Croatia    | Adverse effects of medical treatment            | 0 (0 to 0)  | 0 (0 to 0)   | 0% (0% to 0%)             |
| 7  | Croatia    | Conflict and terrorism                          | 0 (0 to 0)  | 0 (0 to 0)   | NA                        |
| 8  | Croatia    | Cyclist road injuries                           | 1 (0 to 1)  | 1 (0 to 1)   | -4.7% (-14.8% to 8.5%)    |
| 9  | Croatia    | Drowning                                        | 0 (0 to 0)  | 0 (0 to 0)   | 100.1% (79% to 123.2%)    |
| 10 | Croatia    | Environmental heat and cold exposure            | 0 (0 to 0)  | 0 (0 to 0)   | -24.3% (-29.7% to -19.1%) |
| 11 | Croatia    | Executions and police conflict                  | 0 (0 to 0)  | 0 (0 to 0)   | NA                        |
| 12 | Croatia    | Exposure to forces of nature                    | 0 (0 to 0)  | 0 (0 to 0)   | NA                        |
| 13 | Croatia    | Falls                                           | 7 (5 to 10) | 10 (7 to 13) | 35.8% (29.4% to 43.1%)    |
| 14 | Croatia    | Fire, heat, and hot substances                  | 0 (0 to 0)  | 0 (0 to 0)   | -10.5% (-15.7% to -4.3%)  |
| 15 | Croatia    | Foreign body in eyes                            | 0 (0 to 0)  | 0 (0 to 0)   | 0% (0% to 0%)             |
| 16 | Croatia    | Foreign body in other body part                 | 0 (0 to 0)  | 0 (0 to 0)   | -13% (-20% to -5.8%)      |
| 17 | Croatia    | Motor vehicle road injuries                     | 3 (1 to 4)  | 2 (1 to 3)   | -29.4% (-36.5% to -21.6%) |
| 18 | Croatia    | Motorcyclist road injuries                      | 0 (0 to 0)  | 0 (0 to 1)   | 37.2% (16.2% to 64.6%)    |
| 19 | Croatia    | Non-venomous animal contact                     | 0 (0 to 0)  | 0 (0 to 0)   | -21.9% (-28.7% to -15.2%) |
| 20 | Croatia    | Other exposure to mechanical forces             | 2 (1 to 3)  | 1 (1 to 2)   | -25.6% (-32.1% to -18.7%) |
| 21 | Croatia    | Other road injuries                             | 0 (0 to 0)  | 0 (0 to 0)   | 5% (-6.7% to 18.9%)       |
| 22 | Croatia    | Other transport injuries                        | 0 (0 to 0)  | 0 (0 to 0)   | -13% (-18.4% to -8.1%)    |
| 23 | Croatia    | Other unintentional injuries                    | 1 (0 to 1)  | 0 (0 to 0)   | -66.2% (-71.5% to -60.1%) |
| 24 | Croatia    | Pedestrian road injuries                        | 1 (0 to 2)  | 1 (0 to 1)   | -40.3% (-48.5% to -31.4%) |
| 25 | Croatia    | Physical violence by firearm                    | 0 (0 to 0)  | 0 (0 to 0)   | -41.3% (-54.8% to -27.1%) |
| 26 | Croatia    | Physical violence by other means                | 0 (0 to 1)  | 0 (0 to 0)   | -38.5% (-47.3% to -29.2%) |
| 27 | Croatia    | Physical violence by sharp object               | 0 (0 to 0)  | 0 (0 to 0)   | -45.4% (-54.4% to -36.7%) |
| 28 | Croatia    | Poisoning by carbon monoxide                    | 0 (0 to 0)  | 0 (0 to 0)   | 17.2% (4.5% to 30.6%)     |
| 29 | Croatia    | Poisoning by other means                        | 0 (0 to 0)  | 0 (0 to 0)   | -1.6% (-9.1% to 7.2%)     |
| 30 | Croatia    | Pulmonary aspiration and foreign body in airway | 0 (0 to 0)  | 0 (0 to 0)   | 3.4% (-4.1% to 11.8%)     |
| 31 | Croatia    | Self-harm by firearm                            | 0 (0 to 0)  | 0 (0 to 0)   | -30.7% (-39.1% to -19.8%) |
| 32 | Croatia    | Self-harm by other specified means              | 0 (0 to 1)  | 0 (0 to 0)   | -38.8% (-42.8% to -34.1%) |
| 33 | Croatia    | Unintentional firearm injuries                  | 0 (0 to 0)  | 0 (0 to 0)   | -52.8% (-62.1% to -44.5%) |
| 34 | Croatia    | Venomous animal contact                         | 0 (0 to 0)  | 0 (0 to 0)   | -26.2% (-35.1% to -15.9%) |
| 35 | Cuba       | Adverse effects of medical treatment            | 0 (0 to 0)  | 0 (0 to 0)   | 0% (0% to 0%)             |
| 36 | Cuba       | Conflict and terrorism                          | 0 (0 to 0)  | 0 (0 to 0)   | NA                        |
| 37 | Cuba       | Cyclist road injuries                           | 1 (0 to 1)  | 0 (0 to 1)   | -52.2% (-59.7% to -43.6%) |
| 38 | Cuba       | Drowning                                        | 0 (0 to 0)  | 0 (0 to 0)   | 60.1% (38.8% to 83%)      |
| 39 | Cuba       | Environmental heat and cold exposure            | 0 (0 to 0)  | 0 (0 to 0)   | 8.1% (2.9% to 13.4%)      |
| 40 | Cuba       | Executions and police conflict                  | 0 (0 to 0)  | 0 (0 to 0)   | NA                        |
| 41 | Cuba       | Exposure to forces of nature                    | 0 (0 to 0)  | 0 (0 to 0)   | NA                        |
| 42 | Cuba       | Falls                                           | 3 (2 to 4)  | 5 (3 to 7)   | 55.9% (48.3% to 63.9%)    |
| 43 | Cuba       | Fire, heat, and hot substances                  | 0 (0 to 0)  | 0 (0 to 0)   | 25.2% (13.8% to 37.2%)    |
| 44 | Cuba       | Foreign body in eyes                            | 0 (0 to 0)  | 0 (0 to 0)   | 0% (0% to 0%)             |
| 45 |            |                                                 |             |              |                           |
| 46 |            |                                                 |             |              |                           |

|    |        |                                                 |            |            |                           |
|----|--------|-------------------------------------------------|------------|------------|---------------------------|
| 1  |        |                                                 |            |            |                           |
| 2  | Cuba   | Foreign body in other body part                 | 0 (0 to 0) | 0 (0 to 0) | 34.6% (28.4% to 40.8%)    |
| 3  | Cuba   | Motor vehicle road injuries                     | 0 (0 to 1) | 0 (0 to 1) | -33.3% (-42% to -23.4%)   |
| 4  | Cuba   | Motorcyclist road injuries                      | 0 (0 to 0) | 0 (0 to 0) | -4.6% (-19.9% to 13.9%)   |
| 5  | Cuba   | Non-venomous animal contact                     | 0 (0 to 0) | 0 (0 to 0) | 35.3% (28% to 42.3%)      |
| 6  | Cuba   | Other exposure to mechanical forces             | 0 (0 to 1) | 0 (0 to 1) | 28.1% (14.5% to 39.8%)    |
| 7  | Cuba   | Other road injuries                             | 0 (0 to 0) | 0 (0 to 0) | 22.6% (5.5% to 43.8%)     |
| 8  | Cuba   | Other transport injuries                        | 0 (0 to 0) | 0 (0 to 0) | 42.9% (31.7% to 53.3%)    |
| 9  | Cuba   | Other unintentional injuries                    | 0 (0 to 0) | 0 (0 to 0) | 14.8% (6.8% to 21.8%)     |
| 10 | Cuba   | Pedestrian road injuries                        | 0 (0 to 0) | 0 (0 to 0) | -45.5% (-53.6% to -36.4%) |
| 11 | Cuba   | Physical violence by firearm                    | 0 (0 to 0) | 0 (0 to 0) | 50.4% (30.9% to 77.7%)    |
| 12 | Cuba   | Physical violence by other means                | 0 (0 to 0) | 0 (0 to 0) | -16.2% (-26.3% to -6%)    |
| 13 | Cuba   | Physical violence by sharp object               | 0 (0 to 0) | 0 (0 to 0) | -18.1% (-30% to -5%)      |
| 14 | Cuba   | Poisoning by carbon monoxide                    | 0 (0 to 0) | 0 (0 to 0) | 76.6% (59% to 98.9%)      |
| 15 | Cuba   | Poisoning by other means                        | 0 (0 to 0) | 0 (0 to 0) | 62.3% (51.4% to 72.6%)    |
| 16 | Cuba   | Pulmonary aspiration and foreign body in airway | 0 (0 to 0) | 0 (0 to 0) | -22.2% (-30.1% to -13.8%) |
| 17 | Cuba   | Self-harm by firearm                            | 0 (0 to 0) | 0 (0 to 0) | -24.8% (-35.4% to -11.8%) |
| 18 | Cuba   | Self-harm by other specified means              | 0 (0 to 0) | 0 (0 to 0) | -56% (-60.8% to -50.6%)   |
| 19 | Cuba   | Unintentional firearm injuries                  | 0 (0 to 0) | 0 (0 to 1) | 64.5% (51.2% to 82.1%)    |
| 20 | Cyprus | Venomous animal contact                         | 0 (0 to 0) | 0 (0 to 0) | 36.2% (26.6% to 46.1%)    |
| 21 | Cyprus | Adverse effects of medical treatment            | 0 (0 to 0) | 0 (0 to 0) | 0% (0% to 0%)             |
| 22 | Cyprus | Conflict and terrorism                          | 0 (0 to 0) | 0 (0 to 0) | NA                        |
| 23 | Cyprus | Cyclist road injuries                           | 0 (0 to 0) | 0 (0 to 0) | -23% (-30.6% to -14.9%)   |
| 24 | Cyprus | Drowning                                        | 0 (0 to 0) | 0 (0 to 0) | 96.2% (78.3% to 116.2%)   |
| 25 | Cyprus | Environmental heat and cold exposure            | 0 (0 to 0) | 0 (0 to 0) | -10.8% (-16.1% to -5.4%)  |
| 26 | Cyprus | Executions and police conflict                  | 0 (0 to 0) | 0 (0 to 0) | NA                        |
| 27 | Cyprus | Exposure to forces of nature                    | 0 (0 to 0) | 0 (0 to 0) | NA                        |
| 28 | Cyprus | Falls                                           | 5 (4 to 7) | 7 (5 to 9) | 23.2% (18% to 28%)        |
| 29 | Cyprus | Fire, heat, and hot substances                  | 0 (0 to 0) | 0 (0 to 0) | -11.5% (-17.3% to -6.6%)  |
| 30 | Cyprus | Foreign body in eyes                            | 0 (0 to 0) | 0 (0 to 0) | 0% (0% to 0%)             |
| 31 | Cyprus | Foreign body in other body part                 | 0 (0 to 0) | 0 (0 to 0) | 0.6% (-2.9% to 4.4%)      |
| 32 | Cyprus | Motor vehicle road injuries                     | 1 (0 to 1) | 0 (0 to 1) | -40.8% (-46.1% to -35.3%) |
| 33 | Cyprus | Motorcyclist road injuries                      | 0 (0 to 0) | 0 (0 to 0) | -34.9% (-43.4% to -24.6%) |
| 34 | Cyprus | Non-venomous animal contact                     | 0 (0 to 0) | 0 (0 to 0) | -9.7% (-13.6% to -6%)     |
| 35 | Cyprus | Other exposure to mechanical forces             | 1 (0 to 1) | 1 (0 to 1) | -21.1% (-28.6% to -15.3%) |
| 36 | Cyprus | Other road injuries                             | 0 (0 to 0) | 0 (0 to 0) | -12.8% (-21.6% to -3.7%)  |
| 37 | Cyprus | Other transport injuries                        | 0 (0 to 0) | 0 (0 to 0) | -39.8% (-46.2% to -33%)   |
| 38 | Cyprus | Other unintentional injuries                    | 0 (0 to 0) | 0 (0 to 0) | -10.8% (-15.5% to -6.5%)  |
| 39 | Cyprus | Pedestrian road injuries                        | 0 (0 to 0) | 0 (0 to 0) | -43.6% (-50.5% to -36.1%) |
| 40 | Cyprus | Physical violence by firearm                    | 0 (0 to 0) | 0 (0 to 0) | 50.2% (35.4% to 68.5%)    |
| 41 | Cyprus | Physical violence by other means                | 0 (0 to 0) | 0 (0 to 0) | -27.3% (-34.8% to -20.2%) |
| 42 | Cyprus | Physical violence by sharp object               | 0 (0 to 0) | 0 (0 to 0) | -20.9% (-29.7% to -11.8%) |
| 43 | Cyprus | Poisoning by carbon monoxide                    | 0 (0 to 0) | 0 (0 to 0) | 20.7% (10.6% to 31%)      |
| 44 | Cyprus | Poisoning by other means                        | 0 (0 to 0) | 0 (0 to 0) | -9.9% (-18.3% to -4%)     |
| 45 |        |                                                 |            |            |                           |
| 46 |        |                                                 |            |            |                           |

|    |               |                                                 |              |             |                           |
|----|---------------|-------------------------------------------------|--------------|-------------|---------------------------|
| 1  |               |                                                 |              |             |                           |
| 2  | Cyprus        | Pulmonary aspiration and foreign body in airway | 0 (0 to 0)   | 0 (0 to 0)  | -23.8% (-30% to -16.9%)   |
| 3  | Cyprus        | Self-harm by firearm                            | 0 (0 to 0)   | 0 (0 to 0)  | 9.5% (-2.5% to 22.3%)     |
| 4  | Cyprus        | Self-harm by other specified means              | 0 (0 to 0)   | 0 (0 to 0)  | -1.9% (-7.7% to 5%)       |
| 5  | Cyprus        | Unintentional firearm injuries                  | 0 (0 to 0)   | 0 (0 to 0)  | -23.9% (-34% to -14.9%)   |
| 6  | Cyprus        | Venomous animal contact                         | 0 (0 to 0)   | 0 (0 to 0)  | -13.1% (-19.6% to -7.9%)  |
| 7  | Czechia       | Adverse effects of medical treatment            | 0 (0 to 0)   | 0 (0 to 0)  | 0% (0% to 0%)             |
| 8  | Czechia       | Conflict and terrorism                          | 0 (0 to 0)   | 0 (0 to 0)  | NA                        |
| 9  | Czechia       | Cyclist road injuries                           | 1 (0 to 1)   | 1 (0 to 1)  | -8.3% (-19.5% to 4.9%)    |
| 10 | Czechia       | Drowning                                        | 0 (0 to 0)   | 0 (0 to 0)  | 85% (61% to 105.3%)       |
| 11 | Czechia       | Environmental heat and cold exposure            | 0 (0 to 0)   | 0 (0 to 0)  | 2.5% (-3.5% to 8.5%)      |
| 12 | Czechia       | Executions and police conflict                  | 0 (0 to 0)   | 0 (0 to 0)  | NA                        |
| 13 | Czechia       | Exposure to forces of nature                    | 0 (0 to 0)   | 0 (0 to 0)  | NA                        |
| 14 | Czechia       | Falls                                           | 10 (7 to 14) | 8 (5 to 10) | -25.2% (-30.7% to -19.4%) |
| 15 | Czechia       | Fire, heat, and hot substances                  | 0 (0 to 0)   | 0 (0 to 0)  | -4.5% (-10.6% to 0.4%)    |
| 16 | Czechia       | Foreign body in eyes                            | 0 (0 to 0)   | 0 (0 to 0)  | 0% (0% to 0%)             |
| 17 | Czechia       | Foreign body in other body part                 | 0 (0 to 0)   | 0 (0 to 0)  | 0.6% (-3.5% to 4.3%)      |
| 18 | Czechia       | Motor vehicle road injuries                     | 3 (1 to 4)   | 2 (1 to 3)  | -38.7% (-46.2% to -31.3%) |
| 19 | Czechia       | Motorcyclist road injuries                      | 0 (0 to 1)   | 0 (0 to 1)  | -5% (-19.4% to 12.4%)     |
| 20 | Czechia       | Non-venomous animal contact                     | 0 (0 to 0)   | 0 (0 to 0)  | -13.7% (-17.3% to -9.9%)  |
| 21 | Czechia       | Other exposure to mechanical forces             | 2 (1 to 3)   | 2 (1 to 3)  | -8.3% (-13.4% to -2.6%)   |
| 22 | Czechia       | Other road injuries                             | 0 (0 to 0)   | 0 (0 to 0)  | -1.1% (-13.2% to 13%)     |
| 23 | Czechia       | Other transport injuries                        | 0 (0 to 0)   | 0 (0 to 0)  | -17.2% (-22.6% to -11.7%) |
| 24 | Czechia       | Other unintentional injuries                    | 0 (0 to 1)   | 0 (0 to 1)  | -22.3% (-29.2% to -15%)   |
| 25 | Czechia       | Pedestrian road injuries                        | 0 (0 to 1)   | 0 (0 to 1)  | -11.6% (-22.9% to 1.3%)   |
| 26 | Czechia       | Physical violence by firearm                    | 0 (0 to 0)   | 0 (0 to 0)  | 60.9% (41.7% to 81.6%)    |
| 27 | Czechia       | Physical violence by other means                | 0 (0 to 1)   | 0 (0 to 1)  | -9.7% (-19.5% to -0.8%)   |
| 28 | Czechia       | Physical violence by sharp object               | 0 (0 to 0)   | 0 (0 to 0)  | -20.1% (-31.2% to -9.5%)  |
| 29 | Czechia       | Poisoning by carbon monoxide                    | 0 (0 to 0)   | 0 (0 to 0)  | -3.5% (-17.2% to 9.7%)    |
| 30 | Czechia       | Poisoning by other means                        | 0 (0 to 0)   | 0 (0 to 0)  | -4% (-13.6% to 4.7%)      |
| 31 | Czechia       | Pulmonary aspiration and foreign body in airway | 0 (0 to 0)   | 0 (0 to 0)  | -25.5% (-32.7% to -18%)   |
| 32 | Czechia       | Self-harm by firearm                            | 0 (0 to 0)   | 0 (0 to 0)  | -0.6% (-13.2% to 18.6%)   |
| 33 | Czechia       | Self-harm by other specified means              | 0 (0 to 1)   | 0 (0 to 1)  | -24.3% (-28.5% to -19.2%) |
| 34 | Czechia       | Unintentional firearm injuries                  | 0 (0 to 0)   | 0 (0 to 0)  | -2.3% (-10.4% to 6%)      |
| 35 | Czechia       | Venomous animal contact                         | 0 (0 to 0)   | 0 (0 to 0)  | -16.7% (-21.7% to -11.5%) |
| 36 | Côte d'Ivoire | Adverse effects of medical treatment            | 0 (0 to 0)   | 0 (0 to 0)  | 0% (0% to 0%)             |
| 37 | Côte d'Ivoire | Conflict and terrorism                          | 0 (0 to 0)   | 0 (0 to 0)  | NA                        |
| 38 | Côte d'Ivoire | Cyclist road injuries                           | 1 (1 to 2)   | 1 (1 to 3)  | 9.1% (1.8% to 17.6%)      |
| 39 | Côte d'Ivoire | Drowning                                        | 0 (0 to 0)   | 0 (0 to 0)  | -9.7% (-16.5% to -2.3%)   |
| 40 | Côte d'Ivoire | Environmental heat and cold exposure            | 0 (0 to 0)   | 0 (0 to 0)  | 1.5% (-2.6% to 6.9%)      |
| 41 | Côte d'Ivoire | Executions and police conflict                  | 0 (0 to 0)   | 0 (0 to 0)  | NA                        |
| 42 | Côte d'Ivoire | Exposure to forces of nature                    | 0 (0 to 0)   | 0 (0 to 0)  | NA                        |
| 43 | Côte d'Ivoire | Falls                                           | 3 (2 to 4)   | 3 (2 to 5)  | 10.9% (7.2% to 15%)       |
| 44 | Côte d'Ivoire | Fire, heat, and hot substances                  | 0 (0 to 0)   | 0 (0 to 0)  | -9.4% (-14.7% to -4%)     |
| 45 |               |                                                 |              |             |                           |
| 46 |               |                                                 |              |             |                           |

|    |                                       |                                                 |            |            |                           |
|----|---------------------------------------|-------------------------------------------------|------------|------------|---------------------------|
| 1  |                                       |                                                 |            |            |                           |
| 2  | Côte d'Ivoire                         | Foreign body in eyes                            | 0 (0 to 0) | 0 (0 to 0) | 0% (0% to 0%)             |
| 3  | Côte d'Ivoire                         | Foreign body in other body part                 | 1 (0 to 1) | 1 (0 to 1) | 1.7% (-1.9% to 5.3%)      |
| 4  | Côte d'Ivoire                         | Motor vehicle road injuries                     | 2 (1 to 3) | 2 (1 to 3) | 1.3% (-6.4% to 9.7%)      |
| 5  | Côte d'Ivoire                         | Motorcyclist road injuries                      | 1 (0 to 1) | 1 (0 to 1) | -0.8% (-8.8% to 7.9%)     |
| 6  | Côte d'Ivoire                         | Non-venomous animal contact                     | 0 (0 to 0) | 0 (0 to 0) | -9.2% (-13.3% to -4.9%)   |
| 7  | Côte d'Ivoire                         | Other exposure to mechanical forces             | 0 (0 to 0) | 0 (0 to 0) | -11.4% (-16% to -7.1%)    |
| 8  | Côte d'Ivoire                         | Other road injuries                             | 0 (0 to 0) | 0 (0 to 0) | 5.2% (-3.7% to 14%)       |
| 9  | Côte d'Ivoire                         | Other transport injuries                        | 0 (0 to 1) | 0 (0 to 0) | -7.9% (-11.6% to -4.2%)   |
| 10 | Côte d'Ivoire                         | Other unintentional injuries                    | 0 (0 to 1) | 0 (0 to 0) | -10.2% (-14.8% to -5.5%)  |
| 11 | Côte d'Ivoire                         | Pedestrian road injuries                        | 2 (1 to 4) | 2 (1 to 4) | -4.1% (-10.6% to 2.7%)    |
| 12 | Côte d'Ivoire                         | Physical violence by firearm                    | 0 (0 to 0) | 0 (0 to 0) | 4.6% (-6.4% to 19%)       |
| 13 | Côte d'Ivoire                         | Physical violence by other means                | 0 (0 to 0) | 0 (0 to 0) | -3.9% (-9.2% to 1.4%)     |
| 14 | Côte d'Ivoire                         | Physical violence by sharp object               | 0 (0 to 0) | 0 (0 to 0) | -6.9% (-13.8% to 0%)      |
| 15 | Côte d'Ivoire                         | Poisoning by carbon monoxide                    | 0 (0 to 0) | 0 (0 to 0) | 12.1% (1.3% to 23.5%)     |
| 16 | Côte d'Ivoire                         | Poisoning by other means                        | 0 (0 to 0) | 0 (0 to 0) | -13.5% (-19.5% to -7.1%)  |
| 17 | Côte d'Ivoire                         | Pulmonary aspiration and foreign body in airway | 0 (0 to 0) | 0 (0 to 0) | -6% (-15.4% to 3%)        |
| 18 | Côte d'Ivoire                         | Self-harm by firearm                            | 0 (0 to 0) | 0 (0 to 0) | 1.9% (-10.6% to 14.4%)    |
| 19 | Côte d'Ivoire                         | Self-harm by other specified means              | 0 (0 to 0) | 0 (0 to 0) | 0.7% (-4.2% to 5.5%)      |
| 20 | Côte d'Ivoire                         | Unintentional firearm injuries                  | 0 (0 to 0) | 0 (0 to 0) | -12.1% (-18.7% to -5.6%)  |
| 21 | Côte d'Ivoire                         | Venomous animal contact                         | 0 (0 to 0) | 0 (0 to 0) | -10% (-16.8% to -3.5%)    |
| 22 | Democratic People's Republic of Korea | Adverse effects of medical treatment            | 0 (0 to 0) | 0 (0 to 0) | 0% (0% to 0%)             |
| 23 | Democratic People's Republic of Korea | Conflict and terrorism                          | 0 (0 to 0) | 0 (0 to 0) | NA                        |
| 24 | Democratic People's Republic of Korea | Cyclist road injuries                           | 0 (0 to 0) | 0 (0 to 0) | 42.9% (30.5% to 57.4%)    |
| 25 | Democratic People's Republic of Korea | Drowning                                        | 0 (0 to 0) | 0 (0 to 0) | -22% (-32.7% to -8.9%)    |
| 26 | Democratic People's Republic of Korea | Environmental heat and cold exposure            | 0 (0 to 0) | 0 (0 to 0) | 3.5% (-1.6% to 8.9%)      |
| 27 | Democratic People's Republic of Korea | Executions and police conflict                  | 0 (0 to 0) | 0 (0 to 0) | NA                        |
| 28 | Democratic People's Republic of Korea | Exposure to forces of nature                    | 0 (0 to 0) | 0 (0 to 0) | NA                        |
| 29 | Democratic People's Republic of Korea | Falls                                           | 1 (1 to 2) | 1 (1 to 1) | -37.2% (-39.3% to -34.9%) |
| 30 | Democratic People's Republic of Korea | Fire, heat, and hot substances                  | 0 (0 to 0) | 0 (0 to 0) | -13.7% (-18.7% to -8.9%)  |
| 31 | Democratic People's Republic of Korea | Foreign body in eyes                            | 0 (0 to 0) | 0 (0 to 0) | 0% (0% to 0%)             |
| 32 | Democratic People's Republic of Korea | Foreign body in other body part                 | 0 (0 to 0) | 0 (0 to 0) | -5.4% (-9.5% to -1.1%)    |
| 33 | Democratic People's Republic of Korea | Motor vehicle road injuries                     | 0 (0 to 0) | 0 (0 to 0) | 18% (7.8% to 28.7%)       |
| 34 | Democratic People's Republic of Korea | Motorcyclist road injuries                      | 0 (0 to 1) | 0 (0 to 1) | 44.9% (32% to 58.5%)      |
| 35 | Democratic People's Republic of Korea | Non-venomous animal contact                     | 0 (0 to 0) | 0 (0 to 0) | -14.8% (-18.5% to -11.1%) |
| 36 | Democratic People's Republic of Korea | Other exposure to mechanical forces             | 0 (0 to 0) | 0 (0 to 0) | 75.2% (56.8% to 102.6%)   |
| 37 | Democratic People's Republic of Korea | Other road injuries                             | 0 (0 to 0) | 0 (0 to 0) | 12.3% (2.4% to 24%)       |
| 38 | Democratic People's Republic of Korea | Other transport injuries                        | 0 (0 to 0) | 0 (0 to 0) | -4.9% (-8.4% to -0.9%)    |
| 39 | Democratic People's Republic of Korea | Other unintentional injuries                    | 0 (0 to 0) | 0 (0 to 0) | 2.9% (-2.3% to 9.5%)      |
| 40 | Democratic People's Republic of Korea | Pedestrian road injuries                        | 0 (0 to 0) | 0 (0 to 0) | 16% (6.8% to 26.2%)       |
| 41 | Democratic People's Republic of Korea | Physical violence by firearm                    | 0 (0 to 0) | 0 (0 to 0) | 8.1% (-3.5% to 19.3%)     |
| 42 | Democratic People's Republic of Korea | Physical violence by other means                | 0 (0 to 0) | 0 (0 to 0) | 20.5% (12.3% to 30.5%)    |
| 43 | Democratic People's Republic of Korea | Physical violence by sharp object               | 0 (0 to 0) | 0 (0 to 0) | 4.8% (-4.5% to 14.3%)     |
| 44 | Democratic People's Republic of Korea | Poisoning by carbon monoxide                    | 0 (0 to 0) | 0 (0 to 0) | 18.2% (8.4% to 29.9%)     |
| 45 |                                       |                                                 |            |            |                           |
| 46 |                                       |                                                 |            |            |                           |



|    |                                       |                                                 |             |            |                           |
|----|---------------------------------------|-------------------------------------------------|-------------|------------|---------------------------|
| 1  |                                       |                                                 |             |            |                           |
| 2  | Democratic People's Republic of Korea | Poisoning by other means                        | 0 (0 to 0)  | 0 (0 to 0) | -10.1% (-16.9% to -2.3%)  |
| 3  | Democratic People's Republic of Korea | Pulmonary aspiration and foreign body in airway | 0 (0 to 0)  | 0 (0 to 0) | 18.2% (2.5% to 35.6%)     |
| 4  | Democratic People's Republic of Korea | Self-harm by firearm                            | 0 (0 to 0)  | 0 (0 to 0) | -29.2% (-35.3% to -20.3%) |
| 5  | Democratic People's Republic of Korea | Self-harm by other specified means              | 0 (0 to 0)  | 0 (0 to 0) | -44.1% (-48.1% to -39.9%) |
| 6  | Democratic People's Republic of Korea | Unintentional firearm injuries                  | 0 (0 to 0)  | 0 (0 to 0) | 5.9% (-6.9% to 17.4%)     |
| 7  | Democratic People's Republic of Korea | Venomous animal contact                         | 0 (0 to 0)  | 0 (0 to 0) | -7.9% (-14.4% to -0.4%)   |
| 8  | Democratic Republic of the Congo      | Adverse effects of medical treatment            | 0 (0 to 0)  | 0 (0 to 0) | 0% (0% to 0%)             |
| 9  | Democratic Republic of the Congo      | Conflict and terrorism                          | 0 (0 to 1)  | 1 (0 to 3) | NA                        |
| 10 | Democratic Republic of the Congo      | Cyclist road injuries                           | 0 (0 to 0)  | 0 (0 to 0) | -7.1% (-13.4% to -0.8%)   |
| 11 | Democratic Republic of the Congo      | Drowning                                        | 0 (0 to 0)  | 0 (0 to 0) | -25.8% (-32.4% to -18%)   |
| 12 | Democratic Republic of the Congo      | Environmental heat and cold exposure            | 0 (0 to 0)  | 0 (0 to 0) | -3.1% (-8.5% to 2.2%)     |
| 13 | Democratic Republic of the Congo      | Executions and police conflict                  | 0 (0 to 0)  | 0 (0 to 0) | NA                        |
| 14 | Democratic Republic of the Congo      | Exposure to forces of nature                    | 0 (0 to 0)  | 0 (0 to 0) | NA                        |
| 15 | Democratic Republic of the Congo      | Falls                                           | 1 (1 to 1)  | 1 (1 to 1) | 20.5% (16.2% to 25.2%)    |
| 16 | Democratic Republic of the Congo      | Fire, heat, and hot substances                  | 0 (0 to 0)  | 0 (0 to 0) | -9.4% (-14.3% to -4.8%)   |
| 17 | Democratic Republic of the Congo      | Foreign body in eyes                            | 0 (0 to 0)  | 0 (0 to 0) | 0% (0% to 0%)             |
| 18 | Democratic Republic of the Congo      | Foreign body in other body part                 | 0 (0 to 1)  | 0 (0 to 1) | -4.5% (-8.1% to -0.3%)    |
| 19 | Democratic Republic of the Congo      | Motor vehicle road injuries                     | 1 (0 to 1)  | 1 (0 to 1) | -12.9% (-18.3% to -7.3%)  |
| 20 | Democratic Republic of the Congo      | Motorcyclist road injuries                      | 0 (0 to 0)  | 0 (0 to 0) | -9.9% (-19% to -0.6%)     |
| 21 | Democratic Republic of the Congo      | Non-venomous animal contact                     | 0 (0 to 0)  | 0 (0 to 0) | 3.2% (-1.4% to 7.5%)      |
| 22 | Democratic Republic of the Congo      | Other exposure to mechanical forces             | 0 (0 to 0)  | 0 (0 to 0) | -7.2% (-12.5% to -2%)     |
| 23 | Democratic Republic of the Congo      | Other road injuries                             | 0 (0 to 0)  | 0 (0 to 0) | -1.2% (-9.2% to 8%)       |
| 24 | Democratic Republic of the Congo      | Other transport injuries                        | 0 (0 to 0)  | 0 (0 to 0) | 1.2% (-2.7% to 5.4%)      |
| 25 | Democratic Republic of the Congo      | Other unintentional injuries                    | 0 (0 to 0)  | 0 (0 to 0) | -5.8% (-10.4% to -0.4%)   |
| 26 | Democratic Republic of the Congo      | Pedestrian road injuries                        | 0 (0 to 1)  | 0 (0 to 1) | -5.9% (-11.4% to 0.1%)    |
| 27 | Democratic Republic of the Congo      | Physical violence by firearm                    | 0 (0 to 0)  | 0 (0 to 0) | 2.2% (-6.9% to 12.9%)     |
| 28 | Democratic Republic of the Congo      | Physical violence by other means                | 0 (0 to 0)  | 0 (0 to 0) | -11% (-16.9% to -4.6%)    |
| 29 | Democratic Republic of the Congo      | Physical violence by sharp object               | 0 (0 to 0)  | 0 (0 to 0) | -6.6% (-13.6% to 0.6%)    |
| 30 | Democratic Republic of the Congo      | Poisoning by carbon monoxide                    | 0 (0 to 0)  | 0 (0 to 0) | 10% (-1.4% to 22%)        |
| 31 | Democratic Republic of the Congo      | Poisoning by other means                        | 0 (0 to 0)  | 0 (0 to 0) | -19.6% (-26.1% to -12.8%) |
| 32 | Democratic Republic of the Congo      | Pulmonary aspiration and foreign body in airway | 0 (0 to 0)  | 0 (0 to 0) | -11.7% (-19.6% to -1.7%)  |
| 33 | Democratic Republic of the Congo      | Self-harm by firearm                            | 0 (0 to 0)  | 0 (0 to 0) | 13.5% (1.8% to 28%)       |
| 34 | Democratic Republic of the Congo      | Self-harm by other specified means              | 0 (0 to 0)  | 0 (0 to 0) | 0.4% (-4.6% to 5.2%)      |
| 35 | Democratic Republic of the Congo      | Unintentional firearm injuries                  | 0 (0 to 0)  | 0 (0 to 0) | -10% (-15.5% to -4.1%)    |
| 36 | Democratic Republic of the Congo      | Venomous animal contact                         | 0 (0 to 0)  | 0 (0 to 0) | 8.8% (1.4% to 17.3%)      |
| 37 | Denmark                               | Adverse effects of medical treatment            | 0 (0 to 0)  | 0 (0 to 0) | 0% (0% to 0%)             |
| 38 | Denmark                               | Conflict and terrorism                          | 0 (0 to 0)  | 0 (0 to 0) | NA                        |
| 39 | Denmark                               | Cyclist road injuries                           | 0 (0 to 1)  | 0 (0 to 0) | -49.6% (-57.2% to -41.8%) |
| 40 | Denmark                               | Drowning                                        | 0 (0 to 0)  | 0 (0 to 0) | 73.8% (58.1% to 90.3%)    |
| 41 | Denmark                               | Environmental heat and cold exposure            | 0 (0 to 0)  | 0 (0 to 0) | 1.7% (-1.7% to 5.5%)      |
| 42 | Denmark                               | Executions and police conflict                  | 0 (0 to 0)  | 0 (0 to 0) | NA                        |
| 43 | Denmark                               | Exposure to forces of nature                    | 0 (0 to 0)  | 0 (0 to 0) | NA                        |
| 44 | Denmark                               | Falls                                           | 8 (5 to 11) | 6 (4 to 8) | -21.5% (-27.2% to -14.9%) |
| 45 |                                       |                                                 |             |            |                           |
| 46 |                                       |                                                 |             |            |                           |

|    |          |                                                 |             |            |                           |
|----|----------|-------------------------------------------------|-------------|------------|---------------------------|
| 1  |          |                                                 |             |            |                           |
| 2  | Denmark  | Fire, heat, and hot substances                  | 0 (0 to 0)  | 0 (0 to 0) | -13.8% (-18.6% to -9.4%)  |
| 3  | Denmark  | Foreign body in eyes                            | 0 (0 to 0)  | 0 (0 to 0) | 0% (0% to 0%)             |
| 4  | Denmark  | Foreign body in other body part                 | 0 (0 to 0)  | 0 (0 to 0) | 0.2% (-3.1% to 3.6%)      |
| 5  | Denmark  | Motor vehicle road injuries                     | 1 (0 to 1)  | 0 (0 to 1) | -46.7% (-54.4% to -39.4%) |
| 6  | Denmark  | Motorcyclist road injuries                      | 0 (0 to 0)  | 0 (0 to 0) | -21.1% (-35.2% to -4.9%)  |
| 7  | Denmark  | Non-venomous animal contact                     | 0 (0 to 0)  | 0 (0 to 0) | -4.4% (-7.8% to -0.1%)    |
| 8  | Denmark  | Other exposure to mechanical forces             | 1 (0 to 1)  | 0 (0 to 1) | -8.4% (-16.1% to -2.4%)   |
| 9  | Denmark  | Other road injuries                             | 0 (0 to 0)  | 0 (0 to 0) | -6% (-19.7% to 9.2%)      |
| 10 | Denmark  | Other transport injuries                        | 0 (0 to 0)  | 0 (0 to 0) | -17.1% (-24.2% to -10.4%) |
| 11 | Denmark  | Other unintentional injuries                    | 0 (0 to 1)  | 0 (0 to 0) | -26.5% (-33.4% to -20.4%) |
| 12 | Denmark  | Pedestrian road injuries                        | 0 (0 to 0)  | 0 (0 to 0) | -26.8% (-40% to -12.8%)   |
| 13 | Denmark  | Physical violence by firearm                    | 0 (0 to 0)  | 0 (0 to 0) | 24.2% (10.8% to 41.7%)    |
| 14 | Denmark  | Physical violence by other means                | 0 (0 to 0)  | 0 (0 to 0) | -26.6% (-35.1% to -18.9%) |
| 15 | Denmark  | Physical violence by sharp object               | 0 (0 to 0)  | 0 (0 to 0) | -22.1% (-33% to -12.1%)   |
| 16 | Denmark  | Poisoning by carbon monoxide                    | 0 (0 to 0)  | 0 (0 to 0) | 18.9% (8.8% to 29.6%)     |
| 17 | Denmark  | Poisoning by other means                        | 0 (0 to 0)  | 0 (0 to 0) | -1% (-7.4% to 6%)         |
| 18 | Denmark  | Pulmonary aspiration and foreign body in airway | 0 (0 to 0)  | 0 (0 to 0) | -4.1% (-12.7% to 4.6%)    |
| 19 | Denmark  | Self-harm by firearm                            | 0 (0 to 0)  | 0 (0 to 0) | -38.1% (-48.1% to -28.5%) |
| 20 | Denmark  | Self-harm by other specified means              | 0 (0 to 1)  | 0 (0 to 0) | -56% (-59.4% to -52.8%)   |
| 21 | Denmark  | Unintentional firearm injuries                  | 0 (0 to 0)  | 0 (0 to 0) | 3.4% (-6.5% to 12.7%)     |
| 22 | Denmark  | Venomous animal contact                         | 0 (0 to 0)  | 0 (0 to 0) | -6.7% (-12.3% to -1.3%)   |
| 23 | Djibouti | Adverse effects of medical treatment            | 0 (0 to 0)  | 0 (0 to 0) | 0% (0% to 0%)             |
| 24 | Djibouti | Conflict and terrorism                          | 4 (1 to 11) | 0 (0 to 0) | NA                        |
| 25 | Djibouti | Cyclist road injuries                           | 1 (1 to 3)  | 1 (1 to 3) | 10.7% (3.2% to 18.9%)     |
| 26 | Djibouti | Drowning                                        | 0 (0 to 0)  | 0 (0 to 0) | -2.8% (-10.7% to 5.2%)    |
| 27 | Djibouti | Environmental heat and cold exposure            | 0 (0 to 0)  | 0 (0 to 0) | -8.3% (-13.3% to -2.5%)   |
| 28 | Djibouti | Executions and police conflict                  | 0 (0 to 0)  | 0 (0 to 0) | NA                        |
| 29 | Djibouti | Exposure to forces of nature                    | 0 (0 to 0)  | 0 (0 to 0) | NA                        |
| 30 | Djibouti | Falls                                           | 3 (2 to 4)  | 4 (3 to 5) | 18.4% (14.2% to 23%)      |
| 31 | Djibouti | Fire, heat, and hot substances                  | 0 (0 to 0)  | 0 (0 to 0) | -14.4% (-19.3% to -9.8%)  |
| 32 | Djibouti | Foreign body in eyes                            | 0 (0 to 0)  | 0 (0 to 0) | 0% (0% to 0%)             |
| 33 | Djibouti | Foreign body in other body part                 | 1 (0 to 1)  | 1 (0 to 1) | 1.3% (-2.7% to 5.3%)      |
| 34 | Djibouti | Motor vehicle road injuries                     | 1 (1 to 3)  | 1 (1 to 3) | -6.1% (-12.9% to 1.5%)    |
| 35 | Djibouti | Motorcyclist road injuries                      | 1 (0 to 1)  | 1 (0 to 1) | 15.5% (6% to 25.7%)       |
| 36 | Djibouti | Non-venomous animal contact                     | 0 (0 to 1)  | 0 (0 to 1) | -5% (-9% to -0.4%)        |
| 37 | Djibouti | Other exposure to mechanical forces             | 0 (0 to 1)  | 0 (0 to 1) | -12.8% (-17.5% to -8.4%)  |
| 38 | Djibouti | Other road injuries                             | 0 (0 to 0)  | 0 (0 to 0) | 11% (1.9% to 20.3%)       |
| 39 | Djibouti | Other transport injuries                        | 0 (0 to 1)  | 0 (0 to 1) | -4% (-8% to 0.2%)         |
| 40 | Djibouti | Other unintentional injuries                    | 0 (0 to 1)  | 0 (0 to 0) | -14.2% (-18.4% to -9.5%)  |
| 41 | Djibouti | Pedestrian road injuries                        | 2 (1 to 5)  | 2 (1 to 4) | -14.9% (-20.5% to -9.1%)  |
| 42 | Djibouti | Physical violence by firearm                    | 0 (0 to 0)  | 0 (0 to 0) | 36.1% (22.5% to 53.5%)    |
| 43 | Djibouti | Physical violence by other means                | 0 (0 to 0)  | 0 (0 to 0) | 2.7% (-4.2% to 10.9%)     |
| 44 | Djibouti | Physical violence by sharp object               | 0 (0 to 0)  | 0 (0 to 0) | 4% (-5% to 12.3%)         |
| 45 |          |                                                 |             |            |                           |
| 46 |          |                                                 |             |            |                           |

|    |                    |                                                 |            |            |                           |
|----|--------------------|-------------------------------------------------|------------|------------|---------------------------|
| 1  |                    |                                                 |            |            |                           |
| 2  | Djibouti           | Poisoning by carbon monoxide                    | 0 (0 to 0) | 0 (0 to 0) | 19.4% (7.3% to 34.5%)     |
| 3  | Djibouti           | Poisoning by other means                        | 0 (0 to 0) | 0 (0 to 0) | -19.6% (-25.9% to -12%)   |
| 4  | Djibouti           | Pulmonary aspiration and foreign body in airway | 0 (0 to 0) | 0 (0 to 0) | -11.9% (-20.9% to -1.7%)  |
| 5  | Djibouti           | Self-harm by firearm                            | 0 (0 to 0) | 0 (0 to 0) | 34% (20.2% to 55.1%)      |
| 6  | Djibouti           | Self-harm by other specified means              | 0 (0 to 0) | 0 (0 to 0) | 13.4% (8.1% to 20.1%)     |
| 7  | Djibouti           | Unintentional firearm injuries                  | 0 (0 to 0) | 0 (0 to 0) | -20.7% (-27.5% to -14.6%) |
| 8  | Djibouti           | Venomous animal contact                         | 0 (0 to 0) | 0 (0 to 0) | -9.8% (-15.5% to -3.7%)   |
| 9  | Dominica           | Adverse effects of medical treatment            | 0 (0 to 0) | 0 (0 to 0) | 0% (0% to 0%)             |
| 10 | Dominica           | Conflict and terrorism                          | 0 (0 to 0) | 0 (0 to 0) | NA                        |
| 11 | Dominica           | Cyclist road injuries                           | 0 (0 to 1) | 0 (0 to 0) | -13.6% (-21.3% to -5.3%)  |
| 12 | Dominica           | Drowning                                        | 0 (0 to 0) | 0 (0 to 0) | 9.6% (0.3% to 18.9%)      |
| 13 | Dominica           | Environmental heat and cold exposure            | 0 (0 to 0) | 0 (0 to 1) | 5.1% (1% to 9.6%)         |
| 14 | Dominica           | Executions and police conflict                  | 0 (0 to 0) | 0 (0 to 0) | NA                        |
| 15 | Dominica           | Exposure to forces of nature                    | 0 (0 to 0) | 0 (0 to 0) | NA                        |
| 16 | Dominica           | Falls                                           | 1 (1 to 1) | 1 (1 to 2) | 32.3% (27.3% to 36.9%)    |
| 17 | Dominica           | Fire, heat, and hot substances                  | 0 (0 to 0) | 0 (0 to 0) | -8.7% (-13% to -4.7%)     |
| 18 | Dominica           | Foreign body in eyes                            | 0 (0 to 0) | 0 (0 to 0) | 0% (0% to 0%)             |
| 19 | Dominica           | Foreign body in other body part                 | 0 (0 to 0) | 0 (0 to 0) | -3.8% (-7.3% to 0.2%)     |
| 20 | Dominica           | Motor vehicle road injuries                     | 1 (0 to 1) | 0 (0 to 1) | -12.6% (-20.8% to -4.1%)  |
| 21 | Dominica           | Motorcyclist road injuries                      | 0 (0 to 1) | 0 (0 to 1) | 18.7% (5.4% to 33%)       |
| 22 | Dominica           | Non-venomous animal contact                     | 0 (0 to 0) | 0 (0 to 0) | -7.5% (-12.3% to -2%)     |
| 23 | Dominica           | Other exposure to mechanical forces             | 0 (0 to 0) | 0 (0 to 1) | 19.9% (13.1% to 27.6%)    |
| 24 | Dominica           | Other road injuries                             | 0 (0 to 0) | 0 (0 to 0) | -9.6% (-18% to -0.2%)     |
| 25 | Dominica           | Other transport injuries                        | 0 (0 to 0) | 0 (0 to 0) | 2.7% (-2% to 7.1%)        |
| 26 | Dominica           | Other unintentional injuries                    | 0 (0 to 0) | 0 (0 to 0) | -2.3% (-7.4% to 3%)       |
| 27 | Dominica           | Pedestrian road injuries                        | 0 (0 to 0) | 0 (0 to 0) | -21.7% (-29.2% to -14.5%) |
| 28 | Dominica           | Physical violence by firearm                    | 0 (0 to 0) | 0 (0 to 0) | 79.3% (60.9% to 104.5%)   |
| 29 | Dominica           | Physical violence by other means                | 0 (0 to 0) | 0 (0 to 0) | 26.5% (16% to 37.6%)      |
| 30 | Dominica           | Physical violence by sharp object               | 0 (0 to 0) | 0 (0 to 0) | 34.4% (22.7% to 48.8%)    |
| 31 | Dominica           | Poisoning by carbon monoxide                    | 0 (0 to 0) | 0 (0 to 0) | 4.2% (-9.6% to 19.4%)     |
| 32 | Dominica           | Poisoning by other means                        | 0 (0 to 0) | 0 (0 to 0) | -52.4% (-58.1% to -46.3%) |
| 33 | Dominica           | Pulmonary aspiration and foreign body in airway | 0 (0 to 0) | 0 (0 to 0) | -16.9% (-24.5% to -9.5%)  |
| 34 | Dominica           | Self-harm by firearm                            | 0 (0 to 0) | 0 (0 to 0) | 7.8% (-2.4% to 20.7%)     |
| 35 | Dominica           | Self-harm by other specified means              | 0 (0 to 0) | 0 (0 to 0) | -2.9% (-9.1% to 3.3%)     |
| 36 | Dominica           | Unintentional firearm injuries                  | 0 (0 to 0) | 0 (0 to 0) | 14.8% (6.1% to 23.8%)     |
| 37 | Dominica           | Venomous animal contact                         | 0 (0 to 0) | 0 (0 to 0) | -7.7% (-13% to -2.4%)     |
| 38 | Dominican Republic | Adverse effects of medical treatment            | 0 (0 to 0) | 0 (0 to 0) | 0% (0% to 0%)             |
| 39 | Dominican Republic | Conflict and terrorism                          | 0 (0 to 0) | 0 (0 to 0) | NA                        |
| 40 | Dominican Republic | Cyclist road injuries                           | 0 (0 to 1) | 0 (0 to 0) | -10.2% (-20.3% to -0.2%)  |
| 41 | Dominican Republic | Drowning                                        | 0 (0 to 0) | 0 (0 to 0) | 56.2% (38.7% to 76.7%)    |
| 42 | Dominican Republic | Environmental heat and cold exposure            | 0 (0 to 0) | 0 (0 to 1) | 8% (3.8% to 11.7%)        |
| 43 | Dominican Republic | Executions and police conflict                  | 0 (0 to 0) | 0 (0 to 0) | NA                        |
| 44 | Dominican Republic | Exposure to forces of nature                    | 0 (0 to 0) | 0 (0 to 0) | NA                        |
| 45 |                    |                                                 |            |            |                           |
| 46 |                    |                                                 |            |            |                           |

|    |                    |                                                 |            |            |                           |
|----|--------------------|-------------------------------------------------|------------|------------|---------------------------|
| 1  |                    |                                                 |            |            |                           |
| 2  | Dominican Republic | Falls                                           | 1 (1 to 1) | 1 (1 to 2) | 60.5% (55.5% to 66.6%)    |
| 3  | Dominican Republic | Fire, heat, and hot substances                  | 0 (0 to 0) | 0 (0 to 0) | 4.5% (-0.1% to 8.8%)      |
| 4  | Dominican Republic | Foreign body in eyes                            | 0 (0 to 0) | 0 (0 to 0) | 0% (0% to 0%)             |
| 5  | Dominican Republic | Foreign body in other body part                 | 0 (0 to 0) | 0 (0 to 0) | -4.2% (-8.1% to 0%)       |
| 6  | Dominican Republic | Motor vehicle road injuries                     | 1 (0 to 1) | 1 (1 to 2) | 35.2% (21.5% to 50.2%)    |
| 7  | Dominican Republic | Motorcyclist road injuries                      | 0 (0 to 0) | 0 (0 to 1) | 89.5% (65.5% to 121.1%)   |
| 8  | Dominican Republic | Non-venomous animal contact                     | 0 (0 to 0) | 0 (0 to 0) | -16.5% (-19.9% to -12.6%) |
| 9  | Dominican Republic | Other exposure to mechanical forces             | 0 (0 to 0) | 0 (0 to 1) | 29.8% (20.6% to 38.8%)    |
| 10 | Dominican Republic | Other road injuries                             | 0 (0 to 0) | 0 (0 to 0) | -7.6% (-18.2% to 4.5%)    |
| 11 | Dominican Republic | Other transport injuries                        | 0 (0 to 0) | 0 (0 to 0) | 2.2% (-2% to 7%)          |
| 12 | Dominican Republic | Other unintentional injuries                    | 0 (0 to 0) | 0 (0 to 0) | 3.7% (-2.5% to 10.8%)     |
| 13 | Dominican Republic | Pedestrian road injuries                        | 0 (0 to 0) | 0 (0 to 0) | -1.2% (-11.9% to 10.6%)   |
| 14 | Dominican Republic | Physical violence by firearm                    | 0 (0 to 0) | 0 (0 to 0) | 231.8% (174.6% to 313.4%) |
| 15 | Dominican Republic | Physical violence by other means                | 0 (0 to 0) | 0 (0 to 0) | 24.7% (8.8% to 39.6%)     |
| 16 | Dominican Republic | Physical violence by sharp object               | 0 (0 to 0) | 0 (0 to 0) | 38.8% (15.7% to 60%)      |
| 17 | Dominican Republic | Poisoning by carbon monoxide                    | 0 (0 to 0) | 0 (0 to 0) | 36.2% (20.9% to 53.4%)    |
| 18 | Dominican Republic | Poisoning by other means                        | 0 (0 to 0) | 0 (0 to 0) | 10.1% (1.8% to 17.7%)     |
| 19 | Dominican Republic | Pulmonary aspiration and foreign body in airway | 0 (0 to 0) | 0 (0 to 0) | -25% (-32.4% to -17.5%)   |
| 20 | Dominican Republic | Self-harm by firearm                            | 0 (0 to 0) | 0 (0 to 0) | 69.9% (50.9% to 96.4%)    |
| 21 | Dominican Republic | Self-harm by other specified means              | 0 (0 to 0) | 0 (0 to 0) | 40.5% (30.5% to 51.4%)    |
| 22 | Dominican Republic | Unintentional firearm injuries                  | 0 (0 to 0) | 0 (0 to 1) | 49.1% (38.1% to 64.9%)    |
| 23 | Dominican Republic | Venomous animal contact                         | 0 (0 to 0) | 0 (0 to 0) | -15.2% (-19.1% to -10.2%) |
| 24 | Ecuador            | Adverse effects of medical treatment            | 0 (0 to 0) | 0 (0 to 0) | 0% (0% to 0%)             |
| 25 | Ecuador            | Conflict and terrorism                          | 0 (0 to 0) | 0 (0 to 0) | NA                        |
| 26 | Ecuador            | Cyclist road injuries                           | 0 (0 to 0) | 0 (0 to 0) | 5% (-4.9% to 16.6%)       |
| 27 | Ecuador            | Drowning                                        | 0 (0 to 0) | 0 (0 to 0) | 30.5% (14.8% to 46.6%)    |
| 28 | Ecuador            | Environmental heat and cold exposure            | 0 (0 to 0) | 0 (0 to 0) | 6.5% (2.6% to 11.6%)      |
| 29 | Ecuador            | Executions and police conflict                  | 0 (0 to 0) | 0 (0 to 0) | NA                        |
| 30 | Ecuador            | Exposure to forces of nature                    | 0 (0 to 0) | 0 (0 to 0) | NA                        |
| 31 | Ecuador            | Falls                                           | 2 (1 to 2) | 2 (2 to 3) | 39.7% (34% to 45.4%)      |
| 32 | Ecuador            | Fire, heat, and hot substances                  | 0 (0 to 0) | 0 (0 to 0) | -5.4% (-11.1% to 0.4%)    |
| 33 | Ecuador            | Foreign body in eyes                            | 0 (0 to 0) | 0 (0 to 0) | 0% (0% to 0%)             |
| 34 | Ecuador            | Foreign body in other body part                 | 0 (0 to 0) | 0 (0 to 0) | -10.5% (-16.2% to -4.6%)  |
| 35 | Ecuador            | Motor vehicle road injuries                     | 0 (0 to 1) | 0 (0 to 1) | 22.5% (10.6% to 37.7%)    |
| 36 | Ecuador            | Motorcyclist road injuries                      | 0 (0 to 0) | 0 (0 to 0) | 110.9% (83.6% to 149.5%)  |
| 37 | Ecuador            | Non-venomous animal contact                     | 0 (0 to 0) | 0 (0 to 0) | -4.5% (-9.7% to 0.9%)     |
| 38 | Ecuador            | Other exposure to mechanical forces             | 0 (0 to 1) | 0 (0 to 1) | -0.4% (-8% to 7.5%)       |
| 39 | Ecuador            | Other road injuries                             | 0 (0 to 0) | 0 (0 to 0) | -2.9% (-13.8% to 9.7%)    |
| 40 | Ecuador            | Other transport injuries                        | 0 (0 to 0) | 0 (0 to 0) | 38.7% (27.4% to 51.7%)    |
| 41 | Ecuador            | Other unintentional injuries                    | 0 (0 to 0) | 0 (0 to 0) | -21.3% (-26.7% to -15.7%) |
| 42 | Ecuador            | Pedestrian road injuries                        | 0 (0 to 1) | 0 (0 to 0) | -35.7% (-42.8% to -28.3%) |
| 43 | Ecuador            | Physical violence by firearm                    | 0 (0 to 0) | 0 (0 to 0) | 29.7% (9.3% to 55.4%)     |
| 44 | Ecuador            | Physical violence by other means                | 0 (0 to 0) | 0 (0 to 0) | 7.1% (-5% to 19.2%)       |
| 45 |                    |                                                 |            |            |                           |
| 46 |                    |                                                 |            |            |                           |

|    |             |                                                 |              |            |                           |
|----|-------------|-------------------------------------------------|--------------|------------|---------------------------|
| 1  |             |                                                 |              |            |                           |
| 2  | Ecuador     | Physical violence by sharp object               | 0 (0 to 0)   | 0 (0 to 0) | -20.7% (-31.9% to -10.1%) |
| 3  | Ecuador     | Poisoning by carbon monoxide                    | 0 (0 to 0)   | 0 (0 to 0) | 51.5% (33% to 70.6%)      |
| 4  | Ecuador     | Poisoning by other means                        | 0 (0 to 0)   | 0 (0 to 0) | -4.3% (-11.2% to 3.2%)    |
| 5  | Ecuador     | Pulmonary aspiration and foreign body in airway | 0 (0 to 0)   | 0 (0 to 0) | -27.1% (-35.2% to -19.8%) |
| 6  | Ecuador     | Self-harm by firearm                            | 0 (0 to 0)   | 0 (0 to 0) | 44.4% (21% to 65.5%)      |
| 7  | Ecuador     | Self-harm by other specified means              | 0 (0 to 0)   | 0 (0 to 0) | 82.8% (67.3% to 104.7%)   |
| 8  | Ecuador     | Unintentional firearm injuries                  | 0 (0 to 0)   | 0 (0 to 0) | -10.7% (-19.5% to -1.8%)  |
| 9  | Egypt       | Venomous animal contact                         | 0 (0 to 0)   | 0 (0 to 0) | 1.9% (-3.8% to 8.6%)      |
| 10 | Egypt       | Adverse effects of medical treatment            | 0 (0 to 0)   | 0 (0 to 0) | 0% (0% to 0%)             |
| 11 | Egypt       | Conflict and terrorism                          | 0 (0 to 0)   | 0 (0 to 1) | NA                        |
| 12 | Egypt       | Cyclist road injuries                           | 0 (0 to 0)   | 0 (0 to 0) | 6.5% (-3.7% to 18.2%)     |
| 13 | Egypt       | Drowning                                        | 0 (0 to 0)   | 0 (0 to 0) | 55.7% (29% to 84.9%)      |
| 14 | Egypt       | Environmental heat and cold exposure            | 0 (0 to 0)   | 0 (0 to 0) | -3.1% (-8.7% to 2.6%)     |
| 15 | Egypt       | Executions and police conflict                  | 0 (0 to 0)   | 0 (0 to 0) | NA                        |
| 16 | Egypt       | Exposure to forces of nature                    | 0 (0 to 0)   | 0 (0 to 0) | NA                        |
| 17 | Egypt       | Falls                                           | 1 (1 to 1)   | 1 (1 to 2) | 42.7% (37.3% to 48%)      |
| 18 | Egypt       | Fire, heat, and hot substances                  | 0 (0 to 0)   | 0 (0 to 0) | -14.5% (-21.4% to -7.2%)  |
| 19 | Egypt       | Foreign body in eyes                            | 0 (0 to 0)   | 0 (0 to 0) | 0% (0% to 0%)             |
| 20 | Egypt       | Foreign body in other body part                 | 0 (0 to 0)   | 0 (0 to 0) | 0.6% (-3.4% to 4.4%)      |
| 21 | Egypt       | Motor vehicle road injuries                     | 1 (0 to 1)   | 1 (0 to 1) | -10.6% (-17.5% to -3.4%)  |
| 22 | Egypt       | Motorcyclist road injuries                      | 0 (0 to 0)   | 0 (0 to 0) | 10.7% (-0.8% to 23.5%)    |
| 23 | Egypt       | Non-venomous animal contact                     | 0 (0 to 0)   | 0 (0 to 0) | -7.9% (-12.4% to -3.3%)   |
| 24 | Egypt       | Other exposure to mechanical forces             | 0 (0 to 0)   | 0 (0 to 0) | 15.7% (9.6% to 23.4%)     |
| 25 | Egypt       | Other road injuries                             | 0 (0 to 0)   | 0 (0 to 0) | 7% (-4.1% to 19.7%)       |
| 26 | Egypt       | Other transport injuries                        | 0 (0 to 0)   | 0 (0 to 0) | -28.2% (-32.9% to -22.9%) |
| 27 | Egypt       | Other unintentional injuries                    | 0 (0 to 0)   | 0 (0 to 0) | -6% (-11.5% to 0.3%)      |
| 28 | Egypt       | Pedestrian road injuries                        | 0 (0 to 1)   | 0 (0 to 1) | -15.9% (-24.3% to -7%)    |
| 29 | Egypt       | Physical violence by firearm                    | 0 (0 to 0)   | 0 (0 to 0) | 92.3% (67.4% to 125%)     |
| 30 | Egypt       | Physical violence by other means                | 0 (0 to 0)   | 0 (0 to 0) | -4.8% (-12.8% to 2.2%)    |
| 31 | Egypt       | Physical violence by sharp object               | 0 (0 to 0)   | 0 (0 to 0) | -12.9% (-22.2% to -4.8%)  |
| 32 | Egypt       | Poisoning by carbon monoxide                    | 0 (0 to 0)   | 0 (0 to 0) | 56.1% (38.8% to 75.4%)    |
| 33 | Egypt       | Poisoning by other means                        | 0 (0 to 0)   | 0 (0 to 0) | -3.6% (-12.1% to 5.8%)    |
| 34 | Egypt       | Pulmonary aspiration and foreign body in airway | 0 (0 to 0)   | 0 (0 to 0) | -18.4% (-25.9% to -10%)   |
| 35 | Egypt       | Self-harm by firearm                            | 0 (0 to 0)   | 0 (0 to 0) | 40.5% (26.6% to 59.1%)    |
| 36 | Egypt       | Self-harm by other specified means              | 0 (0 to 0)   | 0 (0 to 0) | 4.2% (-3.2% to 11.6%)     |
| 37 | Egypt       | Unintentional firearm injuries                  | 0 (0 to 0)   | 0 (0 to 0) | -6% (-13.8% to 0.6%)      |
| 38 | Egypt       | Venomous animal contact                         | 0 (0 to 0)   | 0 (0 to 0) | -18.8% (-27.3% to -12.1%) |
| 39 | El Salvador | Adverse effects of medical treatment            | 0 (0 to 0)   | 0 (0 to 0) | 0% (0% to 0%)             |
| 40 | El Salvador | Conflict and terrorism                          | 11 (3 to 34) | 0 (0 to 0) | NA                        |
| 41 | El Salvador | Cyclist road injuries                           | 0 (0 to 0)   | 0 (0 to 0) | -23.7% (-32.4% to -14.7%) |
| 42 | El Salvador | Drowning                                        | 0 (0 to 0)   | 0 (0 to 0) | 61.1% (43.2% to 80%)      |
| 43 | El Salvador | Environmental heat and cold exposure            | 0 (0 to 0)   | 0 (0 to 0) | 2.8% (-1.7% to 6.9%)      |
| 44 | El Salvador | Executions and police conflict                  | 0 (0 to 0)   | 0 (0 to 0) | NA                        |
| 45 |             |                                                 |              |            |                           |
| 46 |             |                                                 |              |            |                           |

|    |                   |                                                 |            |            |                           |
|----|-------------------|-------------------------------------------------|------------|------------|---------------------------|
| 1  |                   |                                                 |            |            |                           |
| 2  | El Salvador       | Exposure to forces of nature                    | 0 (0 to 0) | 0 (0 to 0) | NA                        |
| 3  | El Salvador       | Falls                                           | 2 (1 to 3) | 2 (2 to 3) | 22.4% (17.9% to 26.9%)    |
| 4  | El Salvador       | Fire, heat, and hot substances                  | 0 (0 to 0) | 0 (0 to 0) | -13.3% (-21.3% to -6.7%)  |
| 5  | El Salvador       | Foreign body in eyes                            | 0 (0 to 0) | 0 (0 to 0) | 0% (0% to 0%)             |
| 6  | El Salvador       | Foreign body in other body part                 | 0 (0 to 0) | 0 (0 to 0) | -13.6% (-17.1% to -9.7%)  |
| 7  | El Salvador       | Motor vehicle road injuries                     | 1 (0 to 1) | 1 (0 to 1) | -15.1% (-22.1% to -7.2%)  |
| 8  | El Salvador       | Motorcyclist road injuries                      | 0 (0 to 0) | 0 (0 to 0) | 5.9% (-5.7% to 19.1%)     |
| 9  | El Salvador       | Non-venomous animal contact                     | 0 (0 to 0) | 0 (0 to 0) | -18.5% (-22.6% to -14.7%) |
| 10 | El Salvador       | Other exposure to mechanical forces             | 0 (0 to 0) | 0 (0 to 1) | 4.9% (-3.7% to 12.5%)     |
| 11 | El Salvador       | Other road injuries                             | 0 (0 to 0) | 0 (0 to 0) | -24.1% (-32% to -14.8%)   |
| 12 | El Salvador       | Other transport injuries                        | 0 (0 to 0) | 0 (0 to 0) | -33.5% (-36.6% to -30.2%) |
| 13 | El Salvador       | Other unintentional injuries                    | 0 (0 to 0) | 0 (0 to 0) | -35.9% (-42.5% to -28.7%) |
| 14 | El Salvador       | Pedestrian road injuries                        | 0 (0 to 1) | 0 (0 to 0) | -34.4% (-41.6% to -26.8%) |
| 15 | El Salvador       | Physical violence by firearm                    | 0 (0 to 1) | 1 (0 to 1) | 144.5% (105.6% to 203.1%) |
| 16 | El Salvador       | Physical violence by other means                | 0 (0 to 1) | 0 (0 to 1) | 23.3% (7.6% to 40%)       |
| 17 | El Salvador       | Physical violence by sharp object               | 0 (0 to 1) | 0 (0 to 1) | 8.1% (-8.8% to 26%)       |
| 18 | El Salvador       | Poisoning by carbon monoxide                    | 0 (0 to 0) | 0 (0 to 0) | 30.8% (16.7% to 48.3%)    |
| 19 | El Salvador       | Poisoning by other means                        | 0 (0 to 0) | 0 (0 to 0) | 2.9% (-5.6% to 12.9%)     |
| 20 | El Salvador       | Pulmonary aspiration and foreign body in airway | 0 (0 to 0) | 0 (0 to 0) | -59.3% (-66.6% to -51.4%) |
| 21 | El Salvador       | Self-harm by firearm                            | 0 (0 to 0) | 0 (0 to 0) | 27.6% (9.4% to 53.4%)     |
| 22 | El Salvador       | Self-harm by other specified means              | 0 (0 to 0) | 0 (0 to 0) | -24.1% (-32% to -15.8%)   |
| 23 | El Salvador       | Unintentional firearm injuries                  | 0 (0 to 0) | 0 (0 to 0) | 14.4% (5.3% to 25.7%)     |
| 24 | El Salvador       | Venomous animal contact                         | 0 (0 to 0) | 0 (0 to 0) | -12.3% (-16.9% to -7.3%)  |
| 25 | Equatorial Guinea | Adverse effects of medical treatment            | 0 (0 to 0) | 0 (0 to 0) | 0% (0% to 0%)             |
| 26 | Equatorial Guinea | Conflict and terrorism                          | 0 (0 to 0) | 0 (0 to 0) | NA                        |
| 27 | Equatorial Guinea | Cyclist road injuries                           | 0 (0 to 0) | 0 (0 to 0) | 33.7% (22.6% to 46.6%)    |
| 28 | Equatorial Guinea | Drowning                                        | 0 (0 to 0) | 0 (0 to 0) | -7.7% (-20.1% to 4.5%)    |
| 29 | Equatorial Guinea | Environmental heat and cold exposure            | 0 (0 to 0) | 0 (0 to 0) | -7.9% (-14.9% to 0.3%)    |
| 30 | Equatorial Guinea | Executions and police conflict                  | 0 (0 to 0) | 0 (0 to 0) | NA                        |
| 31 | Equatorial Guinea | Exposure to forces of nature                    | 0 (0 to 0) | 0 (0 to 0) | NA                        |
| 32 | Equatorial Guinea | Falls                                           | 1 (1 to 1) | 1 (1 to 2) | 40.9% (35.2% to 46.7%)    |
| 33 | Equatorial Guinea | Fire, heat, and hot substances                  | 0 (0 to 0) | 0 (0 to 0) | -18.2% (-24.9% to -11.6%) |
| 34 | Equatorial Guinea | Foreign body in eyes                            | 0 (0 to 0) | 0 (0 to 0) | 0% (0% to 0%)             |
| 35 | Equatorial Guinea | Foreign body in other body part                 | 1 (0 to 1) | 0 (0 to 1) | -14.7% (-19.9% to -10.5%) |
| 36 | Equatorial Guinea | Motor vehicle road injuries                     | 1 (0 to 1) | 1 (0 to 1) | 17.9% (8.7% to 28.5%)     |
| 37 | Equatorial Guinea | Motorcyclist road injuries                      | 0 (0 to 0) | 0 (0 to 0) | 10.6% (-4.1% to 26.4%)    |
| 38 | Equatorial Guinea | Non-venomous animal contact                     | 0 (0 to 0) | 0 (0 to 0) | -55.1% (-58.5% to -51.5%) |
| 39 | Equatorial Guinea | Other exposure to mechanical forces             | 0 (0 to 0) | 0 (0 to 0) | -11% (-20% to -1%)        |
| 40 | Equatorial Guinea | Other road injuries                             | 0 (0 to 0) | 0 (0 to 0) | 40.1% (24.7% to 58.5%)    |
| 41 | Equatorial Guinea | Other transport injuries                        | 0 (0 to 0) | 0 (0 to 0) | -20.3% (-26.5% to -14%)   |
| 42 | Equatorial Guinea | Other unintentional injuries                    | 0 (0 to 0) | 0 (0 to 0) | -24.4% (-31.7% to -16.1%) |
| 43 | Equatorial Guinea | Pedestrian road injuries                        | 0 (0 to 1) | 0 (0 to 1) | -16% (-23.5% to -8.1%)    |
| 44 | Equatorial Guinea | Physical violence by firearm                    | 0 (0 to 0) | 0 (0 to 0) | 40.8% (20.7% to 64.8%)    |
| 45 |                   |                                                 |            |            |                           |
| 46 |                   |                                                 |            |            |                           |

|    |                   |                                                 |                 |            |                           |
|----|-------------------|-------------------------------------------------|-----------------|------------|---------------------------|
| 1  |                   |                                                 |                 |            |                           |
| 2  | Equatorial Guinea | Physical violence by other means                | 0 (0 to 0)      | 0 (0 to 0) | -5% (-12.7% to 2.5%)      |
| 3  | Equatorial Guinea | Physical violence by sharp object               | 0 (0 to 0)      | 0 (0 to 0) | 0.7% (-7.3% to 10.9%)     |
| 4  | Equatorial Guinea | Poisoning by carbon monoxide                    | 0 (0 to 0)      | 0 (0 to 0) | 28% (9.2% to 50.6%)       |
| 5  | Equatorial Guinea | Poisoning by other means                        | 0 (0 to 0)      | 0 (0 to 0) | -28% (-38.2% to -15.8%)   |
| 6  | Equatorial Guinea | Pulmonary aspiration and foreign body in airway | 0 (0 to 0)      | 0 (0 to 0) | -52.2% (-59.6% to -43.8%) |
| 7  | Equatorial Guinea | Self-harm by firearm                            | 0 (0 to 0)      | 0 (0 to 0) | 55.5% (33.7% to 83.9%)    |
| 8  | Equatorial Guinea | Self-harm by other specified means              | 0 (0 to 0)      | 0 (0 to 0) | -9.6% (-17.9% to -2%)     |
| 9  | Equatorial Guinea | Unintentional firearm injuries                  | 0 (0 to 0)      | 0 (0 to 0) | -20.2% (-30.5% to -10.8%) |
| 10 | Eritrea           | Venomous animal contact                         | 0 (0 to 0)      | 0 (0 to 0) | -51% (-56.9% to -43.3%)   |
| 11 | Eritrea           | Adverse effects of medical treatment            | 0 (0 to 0)      | 0 (0 to 0) | 0% (0% to 0%)             |
| 12 | Eritrea           | Conflict and terrorism                          | 100 (19 to 319) | 0 (0 to 0) | NA                        |
| 13 | Eritrea           | Cyclist road injuries                           | 1 (1 to 3)      | 2 (1 to 3) | 5% (-2.7% to 12.7%)       |
| 14 | Eritrea           | Drowning                                        | 0 (0 to 0)      | 0 (0 to 0) | -14.5% (-19.9% to -8.7%)  |
| 15 | Eritrea           | Environmental heat and cold exposure            | 0 (0 to 0)      | 0 (0 to 0) | -10% (-15% to -4.5%)      |
| 16 | Eritrea           | Executions and police conflict                  | 0 (0 to 0)      | 0 (0 to 0) | NA                        |
| 17 | Eritrea           | Exposure to forces of nature                    | 0 (0 to 0)      | 0 (0 to 0) | NA                        |
| 18 | Eritrea           | Falls                                           | 3 (2 to 4)      | 4 (2 to 5) | 28.4% (24.3% to 32.6%)    |
| 19 | Eritrea           | Fire, heat, and hot substances                  | 0 (0 to 0)      | 0 (0 to 0) | -11.1% (-15.7% to -7.4%)  |
| 20 | Eritrea           | Foreign body in eyes                            | 0 (0 to 0)      | 0 (0 to 0) | 0% (0% to 0%)             |
| 21 | Eritrea           | Foreign body in other body part                 | 1 (0 to 1)      | 1 (0 to 1) | -1.5% (-4.9% to 2.7%)     |
| 22 | Eritrea           | Motor vehicle road injuries                     | 1 (1 to 2)      | 1 (1 to 2) | 8.4% (-0.5% to 18%)       |
| 23 | Eritrea           | Motorcyclist road injuries                      | 1 (0 to 1)      | 1 (0 to 1) | 2.4% (-5.6% to 10.6%)     |
| 24 | Eritrea           | Non-venomous animal contact                     | 1 (0 to 1)      | 1 (0 to 1) | -12.8% (-16.4% to -9.2%)  |
| 25 | Eritrea           | Other exposure to mechanical forces             | 0 (0 to 1)      | 0 (0 to 1) | -6.5% (-11.1% to -1.3%)   |
| 26 | Eritrea           | Other road injuries                             | 0 (0 to 0)      | 0 (0 to 0) | 13.7% (2.9% to 24.6%)     |
| 27 | Eritrea           | Other transport injuries                        | 0 (0 to 1)      | 0 (0 to 1) | -8.9% (-12.8% to -4.6%)   |
| 28 | Eritrea           | Other unintentional injuries                    | 0 (0 to 1)      | 0 (0 to 0) | -14.1% (-18.6% to -9.6%)  |
| 29 | Eritrea           | Pedestrian road injuries                        | 2 (1 to 4)      | 2 (1 to 4) | -0.1% (-6.9% to 6.2%)     |
| 30 | Eritrea           | Physical violence by firearm                    | 0 (0 to 0)      | 0 (0 to 0) | 45.5% (32.5% to 59.9%)    |
| 31 | Eritrea           | Physical violence by other means                | 0 (0 to 0)      | 0 (0 to 0) | 37.1% (28.3% to 45.8%)    |
| 32 | Eritrea           | Physical violence by sharp object               | 0 (0 to 0)      | 0 (0 to 0) | 40.4% (29.9% to 52.8%)    |
| 33 | Eritrea           | Poisoning by carbon monoxide                    | 0 (0 to 0)      | 0 (0 to 0) | 20% (8% to 33.3%)         |
| 34 | Eritrea           | Poisoning by other means                        | 0 (0 to 0)      | 0 (0 to 0) | -16.9% (-23.2% to -10.5%) |
| 35 | Eritrea           | Pulmonary aspiration and foreign body in airway | 0 (0 to 0)      | 0 (0 to 0) | -10.9% (-20.3% to -0.6%)  |
| 36 | Eritrea           | Self-harm by firearm                            | 0 (0 to 0)      | 0 (0 to 0) | 43% (26.3% to 64.4%)      |
| 37 | Eritrea           | Self-harm by other specified means              | 0 (0 to 0)      | 0 (0 to 0) | 19.4% (13.1% to 25.1%)    |
| 38 | Eritrea           | Unintentional firearm injuries                  | 0 (0 to 0)      | 0 (0 to 0) | -22.6% (-29.1% to -16.1%) |
| 39 | Eritrea           | Venomous animal contact                         | 0 (0 to 0)      | 0 (0 to 0) | -12.8% (-19.2% to -5.4%)  |
| 40 | Estonia           | Adverse effects of medical treatment            | 0 (0 to 0)      | 0 (0 to 0) | 0% (0% to 0%)             |
| 41 | Estonia           | Conflict and terrorism                          | 0 (0 to 0)      | 0 (0 to 0) | NA                        |
| 42 | Estonia           | Cyclist road injuries                           | 1 (0 to 1)      | 0 (0 to 1) | -38.7% (-47.3% to -29.3%) |
| 43 | Estonia           | Drowning                                        | 0 (0 to 0)      | 0 (0 to 0) | -7.7% (-18.8% to 4.4%)    |
| 44 | Estonia           | Environmental heat and cold exposure            | 0 (0 to 1)      | 0 (0 to 0) | -10.9% (-16.7% to -5.5%)  |
| 45 |                   |                                                 |                 |            |                           |
| 46 |                   |                                                 |                 |            |                           |

|    |          |                                                 |             |            |                           |
|----|----------|-------------------------------------------------|-------------|------------|---------------------------|
| 1  |          |                                                 |             |            |                           |
| 2  | Estonia  | Executions and police conflict                  | 0 (0 to 0)  | 0 (0 to 0) | NA                        |
| 3  | Estonia  | Exposure to forces of nature                    | 0 (0 to 0)  | 0 (0 to 0) | NA                        |
| 4  | Estonia  | Falls                                           | 7 (6 to 10) | 6 (4 to 7) | -23.8% (-28% to -19.1%)   |
| 5  | Estonia  | Fire, heat, and hot substances                  | 0 (0 to 0)  | 0 (0 to 0) | -47.4% (-52.4% to -42.1%) |
| 6  | Estonia  | Foreign body in eyes                            | 0 (0 to 0)  | 0 (0 to 0) | 0% (0% to 0%)             |
| 7  | Estonia  | Foreign body in other body part                 | 0 (0 to 0)  | 0 (0 to 0) | 2% (-2% to 7.2%)          |
| 8  | Estonia  | Motor vehicle road injuries                     | 3 (2 to 5)  | 1 (1 to 2) | -57.8% (-64.3% to -51.5%) |
| 9  | Estonia  | Motorcyclist road injuries                      | 0 (0 to 0)  | 0 (0 to 0) | -35.2% (-47.5% to -21.8%) |
| 10 | Estonia  | Non-venomous animal contact                     | 0 (0 to 0)  | 0 (0 to 0) | -7.2% (-11.1% to -3.1%)   |
| 11 | Estonia  | Other exposure to mechanical forces             | 1 (1 to 2)  | 1 (0 to 2) | -22.2% (-30% to -15.1%)   |
| 12 | Estonia  | Other road injuries                             | 0 (0 to 0)  | 0 (0 to 0) | -12.3% (-24.5% to 1.5%)   |
| 13 | Estonia  | Other transport injuries                        | 0 (0 to 0)  | 0 (0 to 0) | -35% (-41.5% to -28%)     |
| 14 | Estonia  | Other unintentional injuries                    | 0 (0 to 0)  | 0 (0 to 0) | -14.9% (-24.7% to -4.2%)  |
| 15 | Estonia  | Pedestrian road injuries                        | 1 (0 to 2)  | 0 (0 to 1) | -64.9% (-70.6% to -58.8%) |
| 16 | Estonia  | Physical violence by firearm                    | 0 (0 to 0)  | 0 (0 to 0) | -53.6% (-66.6% to -38.2%) |
| 17 | Estonia  | Physical violence by other means                | 1 (0 to 1)  | 0 (0 to 1) | -48.7% (-55.3% to -39.9%) |
| 18 | Estonia  | Physical violence by sharp object               | 0 (0 to 1)  | 0 (0 to 0) | -58.2% (-66% to -49.8%)   |
| 19 | Estonia  | Poisoning by carbon monoxide                    | 0 (0 to 0)  | 0 (0 to 0) | 22.9% (1.5% to 43.4%)     |
| 20 | Estonia  | Poisoning by other means                        | 0 (0 to 0)  | 0 (0 to 0) | 6.3% (-5.8% to 17.5%)     |
| 21 | Estonia  | Pulmonary aspiration and foreign body in airway | 0 (0 to 0)  | 0 (0 to 0) | -43.6% (-50.5% to -35.5%) |
| 22 | Estonia  | Self-harm by firearm                            | 0 (0 to 0)  | 0 (0 to 0) | -44.1% (-53.7% to -33.7%) |
| 23 | Estonia  | Self-harm by other specified means              | 1 (0 to 1)  | 0 (0 to 1) | -46.8% (-50.3% to -42.5%) |
| 24 | Estonia  | Unintentional firearm injuries                  | 0 (0 to 0)  | 0 (0 to 0) | -11.9% (-24.7% to 0.8%)   |
| 25 | Estonia  | Venomous animal contact                         | 0 (0 to 0)  | 0 (0 to 0) | -9% (-14.5% to -3.4%)     |
| 26 | Eswatini | Adverse effects of medical treatment            | 0 (0 to 0)  | 0 (0 to 0) | 0% (0% to 0%)             |
| 27 | Eswatini | Conflict and terrorism                          | 0 (0 to 0)  | 0 (0 to 0) | NA                        |
| 28 | Eswatini | Cyclist road injuries                           | 0 (0 to 1)  | 1 (0 to 1) | 26.9% (16.8% to 39.1%)    |
| 29 | Eswatini | Drowning                                        | 0 (0 to 0)  | 0 (0 to 0) | -2.2% (-8.6% to 3.8%)     |
| 30 | Eswatini | Environmental heat and cold exposure            | 0 (0 to 0)  | 0 (0 to 0) | -1% (-6% to 3.9%)         |
| 31 | Eswatini | Executions and police conflict                  | 0 (0 to 0)  | 0 (0 to 0) | NA                        |
| 32 | Eswatini | Exposure to forces of nature                    | 0 (0 to 0)  | 0 (0 to 0) | NA                        |
| 33 | Eswatini | Falls                                           | 2 (2 to 3)  | 3 (2 to 4) | 18.8% (14.7% to 23.3%)    |
| 34 | Eswatini | Fire, heat, and hot substances                  | 0 (0 to 0)  | 0 (0 to 0) | 0.5% (-6% to 6.2%)        |
| 35 | Eswatini | Foreign body in eyes                            | 0 (0 to 0)  | 0 (0 to 0) | 0% (0% to 0%)             |
| 36 | Eswatini | Foreign body in other body part                 | 1 (0 to 1)  | 1 (0 to 1) | -1% (-4.8% to 2.6%)       |
| 37 | Eswatini | Motor vehicle road injuries                     | 1 (0 to 2)  | 1 (1 to 2) | 25.4% (15.8% to 36.5%)    |
| 38 | Eswatini | Motorcyclist road injuries                      | 0 (0 to 1)  | 0 (0 to 1) | 54.9% (38.8% to 75.4%)    |
| 39 | Eswatini | Non-venomous animal contact                     | 0 (0 to 0)  | 0 (0 to 0) | -6% (-10.4% to -0.9%)     |
| 40 | Eswatini | Other exposure to mechanical forces             | 0 (0 to 1)  | 0 (0 to 0) | -4.4% (-9.6% to 1%)       |
| 41 | Eswatini | Other road injuries                             | 0 (0 to 0)  | 0 (0 to 0) | 12.4% (2.9% to 22.7%)     |
| 42 | Eswatini | Other transport injuries                        | 0 (0 to 1)  | 0 (0 to 1) | 6.4% (1.2% to 11.6%)      |
| 43 | Eswatini | Other unintentional injuries                    | 0 (0 to 0)  | 0 (0 to 0) | -9.8% (-14.3% to -5.1%)   |
| 44 | Eswatini | Pedestrian road injuries                        | 1 (1 to 2)  | 2 (1 to 3) | 15.6% (7.2% to 24%)       |
| 45 |          |                                                 |             |            |                           |
| 46 |          |                                                 |             |            |                           |



|    |          |                                                 |                |            |                           |
|----|----------|-------------------------------------------------|----------------|------------|---------------------------|
| 1  |          |                                                 |                |            |                           |
| 2  | Eswatini | Physical violence by firearm                    | 0 (0 to 0)     | 0 (0 to 0) | -16% (-25.7% to -5.1%)    |
| 3  | Eswatini | Physical violence by other means                | 0 (0 to 1)     | 0 (0 to 1) | -12.6% (-20.6% to -3.1%)  |
| 4  | Eswatini | Physical violence by sharp object               | 0 (0 to 0)     | 0 (0 to 0) | -5.3% (-16% to 7%)        |
| 5  | Eswatini | Poisoning by carbon monoxide                    | 0 (0 to 0)     | 0 (0 to 0) | 6.3% (-6.3% to 21%)       |
| 6  | Eswatini | Poisoning by other means                        | 0 (0 to 0)     | 0 (0 to 0) | -6.2% (-13.7% to 2.1%)    |
| 7  | Eswatini | Pulmonary aspiration and foreign body in airway | 0 (0 to 0)     | 0 (0 to 0) | 0.5% (-7% to 8.7%)        |
| 8  | Eswatini | Self-harm by firearm                            | 0 (0 to 0)     | 0 (0 to 0) | 49.1% (30% to 76%)        |
| 9  | Eswatini | Self-harm by other specified means              | 0 (0 to 0)     | 0 (0 to 0) | 41.7% (32.9% to 52.1%)    |
| 10 | Eswatini | Unintentional firearm injuries                  | 0 (0 to 0)     | 0 (0 to 0) | -10.9% (-18.2% to -2.5%)  |
| 11 | Ethiopia | Venomous animal contact                         | 0 (0 to 0)     | 0 (0 to 0) | -14% (-19.9% to -7.1%)    |
| 12 | Ethiopia | Adverse effects of medical treatment            | 0 (0 to 0)     | 0 (0 to 0) | 0% (0% to 0%)             |
| 13 | Ethiopia | Conflict and terrorism                          | 67 (16 to 185) | 0 (0 to 0) | NA                        |
| 14 | Ethiopia | Cyclist road injuries                           | 1 (0 to 1)     | 0 (0 to 1) | -22.9% (-26.3% to -19.6%) |
| 15 | Ethiopia | Drowning                                        | 0 (0 to 0)     | 0 (0 to 0) | -31% (-36.1% to -26.1%)   |
| 16 | Ethiopia | Environmental heat and cold exposure            | 0 (0 to 0)     | 0 (0 to 0) | -16.1% (-22% to -9.7%)    |
| 17 | Ethiopia | Executions and police conflict                  | 0 (0 to 0)     | 0 (0 to 0) | NA                        |
| 18 | Ethiopia | Exposure to forces of nature                    | 0 (0 to 0)     | 0 (0 to 0) | NA                        |
| 19 | Ethiopia | Falls                                           | 1 (1 to 2)     | 1 (1 to 2) | 7.4% (4.5% to 10.5%)      |
| 20 | Ethiopia | Fire, heat, and hot substances                  | 0 (0 to 0)     | 0 (0 to 0) | -23.7% (-27.4% to -20%)   |
| 21 | Ethiopia | Foreign body in eyes                            | 0 (0 to 0)     | 0 (0 to 0) | 0% (0% to 0%)             |
| 22 | Ethiopia | Foreign body in other body part                 | 0 (0 to 1)     | 0 (0 to 1) | -4.6% (-7.9% to -0.9%)    |
| 23 | Ethiopia | Motor vehicle road injuries                     | 1 (0 to 1)     | 1 (0 to 1) | -26.2% (-29.6% to -22.2%) |
| 24 | Ethiopia | Motorcyclist road injuries                      | 0 (0 to 0)     | 0 (0 to 0) | -29.8% (-33.5% to -25.8%) |
| 25 | Ethiopia | Non-venomous animal contact                     | 0 (0 to 1)     | 0 (0 to 1) | -34.5% (-36.7% to -32.2%) |
| 26 | Ethiopia | Other exposure to mechanical forces             | 0 (0 to 0)     | 0 (0 to 0) | -5.4% (-10.8% to 0.8%)    |
| 27 | Ethiopia | Other road injuries                             | 0 (0 to 0)     | 0 (0 to 0) | -2.3% (-8.5% to 4.2%)     |
| 28 | Ethiopia | Other transport injuries                        | 0 (0 to 0)     | 0 (0 to 0) | -23.6% (-27.4% to -20%)   |
| 29 | Ethiopia | Other unintentional injuries                    | 0 (0 to 0)     | 0 (0 to 0) | -29.6% (-32.6% to -26.7%) |
| 30 | Ethiopia | Pedestrian road injuries                        | 1 (0 to 1)     | 0 (0 to 1) | -39.8% (-43.1% to -36.4%) |
| 31 | Ethiopia | Physical violence by firearm                    | 0 (0 to 0)     | 0 (0 to 0) | -29.5% (-32.7% to -25.4%) |
| 32 | Ethiopia | Physical violence by other means                | 0 (0 to 0)     | 0 (0 to 0) | -28.2% (-31.4% to -24.9%) |
| 33 | Ethiopia | Physical violence by sharp object               | 0 (0 to 0)     | 0 (0 to 0) | -23.2% (-26.3% to -19.8%) |
| 34 | Ethiopia | Poisoning by carbon monoxide                    | 0 (0 to 0)     | 0 (0 to 0) | -3.9% (-12.5% to 6.2%)    |
| 35 | Ethiopia | Poisoning by other means                        | 0 (0 to 0)     | 0 (0 to 0) | -43.6% (-47.7% to -38.5%) |
| 36 | Ethiopia | Pulmonary aspiration and foreign body in airway | 0 (0 to 0)     | 0 (0 to 0) | -23.8% (-30.5% to -16.8%) |
| 37 | Ethiopia | Self-harm by firearm                            | 0 (0 to 0)     | 0 (0 to 0) | -19.2% (-26% to -10.8%)   |
| 38 | Ethiopia | Self-harm by other specified means              | 0 (0 to 0)     | 0 (0 to 0) | -43% (-45.7% to -40.1%)   |
| 39 | Ethiopia | Unintentional firearm injuries                  | 0 (0 to 0)     | 0 (0 to 0) | -28.6% (-34.7% to -23.2%) |
| 40 | Ethiopia | Venomous animal contact                         | 0 (0 to 0)     | 0 (0 to 0) | -38.4% (-43.5% to -33.3%) |
| 41 | Fiji     | Adverse effects of medical treatment            | 0 (0 to 0)     | 0 (0 to 0) | 0% (0% to 0%)             |
| 42 | Fiji     | Conflict and terrorism                          | 0 (0 to 0)     | 0 (0 to 0) | NA                        |
| 43 | Fiji     | Cyclist road injuries                           | 0 (0 to 0)     | 0 (0 to 0) | 0.3% (-6.7% to 9%)        |
| 44 | Fiji     | Drowning                                        | 0 (0 to 0)     | 0 (0 to 0) | 6.9% (-1.1% to 15.1%)     |
| 45 |          |                                                 |                |            |                           |
| 46 |          |                                                 |                |            |                           |

|    |         |                                                 |              |              |                           |
|----|---------|-------------------------------------------------|--------------|--------------|---------------------------|
| 1  |         |                                                 |              |              |                           |
| 2  | Fiji    | Environmental heat and cold exposure            | 0 (0 to 0)   | 0 (0 to 0)   | -0.7% (-5.4% to 5%)       |
| 3  | Fiji    | Executions and police conflict                  | 0 (0 to 0)   | 0 (0 to 0)   | NA                        |
| 4  | Fiji    | Exposure to forces of nature                    | 0 (0 to 0)   | 0 (0 to 0)   | NA                        |
| 5  | Fiji    | Falls                                           | 1 (1 to 1)   | 1 (1 to 2)   | 35.6% (31.2% to 40.8%)    |
| 6  | Fiji    | Fire, heat, and hot substances                  | 0 (0 to 0)   | 0 (0 to 0)   | -4.6% (-9.7% to 0.1%)     |
| 7  | Fiji    | Foreign body in eyes                            | 0 (0 to 0)   | 0 (0 to 0)   | 0% (0% to 0%)             |
| 8  | Fiji    | Foreign body in other body part                 | 0 (0 to 0)   | 0 (0 to 0)   | -4.2% (-7.4% to -0.3%)    |
| 9  | Fiji    | Motor vehicle road injuries                     | 0 (0 to 1)   | 0 (0 to 1)   | -19.3% (-25.3% to -13.4%) |
| 10 | Fiji    | Motorcyclist road injuries                      | 0 (0 to 0)   | 0 (0 to 0)   | 13.9% (4.2% to 25.8%)     |
| 11 | Fiji    | Non-venomous animal contact                     | 0 (0 to 0)   | 0 (0 to 0)   | -17.4% (-22.1% to -13.2%) |
| 12 | Fiji    | Other exposure to mechanical forces             | 0 (0 to 0)   | 0 (0 to 0)   | -18.8% (-24.8% to -13.6%) |
| 13 | Fiji    | Other road injuries                             | 0 (0 to 0)   | 0 (0 to 0)   | -2.3% (-11.7% to 8.5%)    |
| 14 | Fiji    | Other transport injuries                        | 0 (0 to 0)   | 0 (0 to 0)   | -3.7% (-8% to 0.7%)       |
| 15 | Fiji    | Other unintentional injuries                    | 0 (0 to 0)   | 0 (0 to 0)   | -20.3% (-24% to -16.1%)   |
| 16 | Fiji    | Pedestrian road injuries                        | 0 (0 to 0)   | 0 (0 to 0)   | -10.8% (-18.9% to -1.8%)  |
| 17 | Fiji    | Physical violence by firearm                    | 0 (0 to 0)   | 0 (0 to 0)   | 22.7% (11.1% to 36.6%)    |
| 18 | Fiji    | Physical violence by other means                | 0 (0 to 1)   | 0 (0 to 1)   | 8.4% (0.6% to 16.5%)      |
| 19 | Fiji    | Physical violence by sharp object               | 0 (0 to 0)   | 0 (0 to 0)   | 4.6% (-5.4% to 16.3%)     |
| 20 | Fiji    | Poisoning by carbon monoxide                    | 0 (0 to 0)   | 0 (0 to 0)   | 14.9% (4.3% to 25.8%)     |
| 21 | Fiji    | Poisoning by other means                        | 0 (0 to 0)   | 0 (0 to 0)   | -8.8% (-15.7% to -2.4%)   |
| 22 | Fiji    | Pulmonary aspiration and foreign body in airway | 0 (0 to 0)   | 0 (0 to 0)   | -5.5% (-14.4% to 4.5%)    |
| 23 | Fiji    | Self-harm by firearm                            | 0 (0 to 0)   | 0 (0 to 0)   | 12.5% (-2.1% to 31.4%)    |
| 24 | Fiji    | Self-harm by other specified means              | 0 (0 to 0)   | 0 (0 to 0)   | -12.2% (-18.2% to -6.1%)  |
| 25 | Fiji    | Unintentional firearm injuries                  | 0 (0 to 0)   | 0 (0 to 0)   | -8.3% (-13.7% to -2.4%)   |
| 26 | Fiji    | Venomous animal contact                         | 0 (0 to 0)   | 0 (0 to 0)   | -7.8% (-14.7% to -0.8%)   |
| 27 | Finland | Adverse effects of medical treatment            | 0 (0 to 0)   | 0 (0 to 0)   | 0% (0% to 0%)             |
| 28 | Finland | Conflict and terrorism                          | 0 (0 to 0)   | 0 (0 to 0)   | NA                        |
| 29 | Finland | Cyclist road injuries                           | 0 (0 to 1)   | 0 (0 to 0)   | -44.5% (-52.1% to -36.9%) |
| 30 | Finland | Drowning                                        | 0 (0 to 0)   | 0 (0 to 0)   | 80.4% (63.2% to 99.6%)    |
| 31 | Finland | Environmental heat and cold exposure            | 0 (0 to 0)   | 0 (0 to 0)   | 7.3% (1.5% to 13.9%)      |
| 32 | Finland | Executions and police conflict                  | 0 (0 to 0)   | 0 (0 to 0)   | NA                        |
| 33 | Finland | Exposure to forces of nature                    | 0 (0 to 0)   | 0 (0 to 0)   | NA                        |
| 34 | Finland | Falls                                           | 10 (7 to 13) | 10 (7 to 13) | 0.7% (-3.5% to 5.3%)      |
| 35 | Finland | Fire, heat, and hot substances                  | 0 (0 to 0)   | 0 (0 to 0)   | -26.5% (-31.6% to -21.3%) |
| 36 | Finland | Foreign body in eyes                            | 0 (0 to 0)   | 0 (0 to 0)   | 0% (0% to 0%)             |
| 37 | Finland | Foreign body in other body part                 | 0 (0 to 0)   | 0 (0 to 0)   | -0.8% (-4.6% to 3.2%)     |
| 38 | Finland | Motor vehicle road injuries                     | 1 (0 to 1)   | 0 (0 to 1)   | -47.4% (-54.1% to -40.8%) |
| 39 | Finland | Motorcyclist road injuries                      | 0 (0 to 0)   | 0 (0 to 0)   | -15.7% (-29.2% to -1.2%)  |
| 40 | Finland | Non-venomous animal contact                     | 0 (0 to 0)   | 0 (0 to 0)   | -19.7% (-23.1% to -16.3%) |
| 41 | Finland | Other exposure to mechanical forces             | 1 (0 to 1)   | 1 (0 to 1)   | -6.8% (-13% to -0.8%)     |
| 42 | Finland | Other road injuries                             | 0 (0 to 0)   | 0 (0 to 0)   | -17.2% (-27.2% to -5.3%)  |
| 43 | Finland | Other transport injuries                        | 0 (0 to 0)   | 0 (0 to 0)   | -34.7% (-40.1% to -28.4%) |
| 44 | Finland | Other unintentional injuries                    | 0 (0 to 1)   | 0 (0 to 0)   | -24.3% (-29.7% to -18.5%) |
| 45 |         |                                                 |              |              |                           |
| 46 |         |                                                 |              |              |                           |

|    |         |                                                 |             |             |                           |
|----|---------|-------------------------------------------------|-------------|-------------|---------------------------|
| 1  |         |                                                 |             |             |                           |
| 2  | Finland | Pedestrian road injuries                        | 0 (0 to 0)  | 0 (0 to 0)  | -32.3% (-42.9% to -20.7%) |
| 3  | Finland | Physical violence by firearm                    | 0 (0 to 0)  | 0 (0 to 0)  | 14% (-0.1% to 31.5%)      |
| 4  | Finland | Physical violence by other means                | 0 (0 to 1)  | 0 (0 to 0)  | -33.4% (-41% to -25.9%)   |
| 5  | Finland | Physical violence by sharp object               | 0 (0 to 0)  | 0 (0 to 0)  | -43.8% (-52.6% to -34.3%) |
| 6  | Finland | Poisoning by carbon monoxide                    | 0 (0 to 0)  | 0 (0 to 0)  | -75.9% (-82.6% to -67.3%) |
| 7  | Finland | Poisoning by other means                        | 0 (0 to 0)  | 0 (0 to 0)  | -43.2% (-52.2% to -34.1%) |
| 8  | Finland | Pulmonary aspiration and foreign body in airway | 0 (0 to 0)  | 0 (0 to 0)  | -20.8% (-27.5% to -14%)   |
| 9  | Finland | Self-harm by firearm                            | 0 (0 to 0)  | 0 (0 to 0)  | -61.3% (-68.9% to -53.7%) |
| 10 | Finland | Self-harm by other specified means              | 1 (0 to 1)  | 0 (0 to 1)  | -37% (-41% to -31.9%)     |
| 11 | Finland | Unintentional firearm injuries                  | 0 (0 to 0)  | 0 (0 to 0)  | 1.8% (-7.8% to 12.9%)     |
| 12 | Finland | Venomous animal contact                         | 0 (0 to 0)  | 0 (0 to 0)  | -14.3% (-19.9% to -8.1%)  |
| 13 | France  | Adverse effects of medical treatment            | 0 (0 to 0)  | 0 (0 to 0)  | 0% (0% to 0%)             |
| 14 | France  | Conflict and terrorism                          | 0 (0 to 0)  | 0 (0 to 0)  | NA                        |
| 15 | France  | Cyclist road injuries                           | 0 (0 to 0)  | 0 (0 to 0)  | -17.3% (-28.6% to -4.1%)  |
| 16 | France  | Drowning                                        | 0 (0 to 0)  | 0 (0 to 0)  | 103.6% (86.4% to 119.2%)  |
| 17 | France  | Environmental heat and cold exposure            | 0 (0 to 0)  | 0 (0 to 0)  | -15.7% (-20.9% to -9.9%)  |
| 18 | France  | Executions and police conflict                  | 0 (0 to 0)  | 0 (0 to 0)  | NA                        |
| 19 | France  | Exposure to forces of nature                    | 0 (0 to 0)  | 0 (0 to 0)  | NA                        |
| 20 | France  | Falls                                           | 8 (6 to 10) | 8 (6 to 11) | 2.5% (-1.8% to 7.3%)      |
| 21 | France  | Fire, heat, and hot substances                  | 0 (0 to 0)  | 0 (0 to 0)  | -12.9% (-17.7% to -7.7%)  |
| 22 | France  | Foreign body in eyes                            | 0 (0 to 0)  | 0 (0 to 0)  | 0% (0% to 0%)             |
| 23 | France  | Foreign body in other body part                 | 0 (0 to 0)  | 0 (0 to 0)  | 6% (2.3% to 10.3%)        |
| 24 | France  | Motor vehicle road injuries                     | 1 (0 to 1)  | 0 (0 to 1)  | -54.9% (-62.3% to -47.2%) |
| 25 | France  | Motorcyclist road injuries                      | 0 (0 to 0)  | 0 (0 to 0)  | -7% (-23.4% to 12.9%)     |
| 26 | France  | Non-venomous animal contact                     | 0 (0 to 0)  | 0 (0 to 0)  | -7.8% (-11% to -3.8%)     |
| 27 | France  | Other exposure to mechanical forces             | 1 (0 to 1)  | 1 (0 to 1)  | -7.4% (-13.6% to -1%)     |
| 28 | France  | Other road injuries                             | 0 (0 to 0)  | 0 (0 to 0)  | -7.8% (-22.5% to 7.9%)    |
| 29 | France  | Other transport injuries                        | 0 (0 to 0)  | 0 (0 to 0)  | 10.7% (6.4% to 15.2%)     |
| 30 | France  | Other unintentional injuries                    | 0 (0 to 1)  | 0 (0 to 0)  | -23.8% (-28.4% to -19.2%) |
| 31 | France  | Pedestrian road injuries                        | 0 (0 to 0)  | 0 (0 to 0)  | -60.9% (-67.9% to -52.8%) |
| 32 | France  | Physical violence by firearm                    | 0 (0 to 0)  | 0 (0 to 0)  | 17.6% (6.1% to 32.7%)     |
| 33 | France  | Physical violence by other means                | 0 (0 to 0)  | 0 (0 to 0)  | -27.6% (-35.8% to -20.9%) |
| 34 | France  | Physical violence by sharp object               | 0 (0 to 0)  | 0 (0 to 0)  | -21.4% (-31.7% to -11.8%) |
| 35 | France  | Poisoning by carbon monoxide                    | 0 (0 to 0)  | 0 (0 to 0)  | 12.9% (4.7% to 22%)       |
| 36 | France  | Poisoning by other means                        | 0 (0 to 0)  | 0 (0 to 0)  | 0.2% (-5.7% to 5.3%)      |
| 37 | France  | Pulmonary aspiration and foreign body in airway | 0 (0 to 0)  | 0 (0 to 0)  | -16.2% (-23.4% to -7.3%)  |
| 38 | France  | Self-harm by firearm                            | 0 (0 to 0)  | 0 (0 to 0)  | -44.1% (-52.7% to -34.9%) |
| 39 | France  | Self-harm by other specified means              | 0 (0 to 1)  | 0 (0 to 1)  | -29.1% (-33.1% to -24%)   |
| 40 | France  | Unintentional firearm injuries                  | 0 (0 to 0)  | 0 (0 to 0)  | -9.1% (-17.8% to -0.4%)   |
| 41 | France  | Venomous animal contact                         | 0 (0 to 0)  | 0 (0 to 0)  | -11.8% (-17.3% to -6.4%)  |
| 42 | Gabon   | Adverse effects of medical treatment            | 0 (0 to 0)  | 0 (0 to 0)  | 0% (0% to 0%)             |
| 43 | Gabon   | Conflict and terrorism                          | 0 (0 to 0)  | 0 (0 to 0)  | NA                        |
| 44 | Gabon   | Cyclist road injuries                           | 0 (0 to 0)  | 0 (0 to 0)  | 0.6% (-6.2% to 8.3%)      |
| 45 |         |                                                 |             |             |                           |
| 46 |         |                                                 |             |             |                           |

|    |        |                                                 |            |            |                           |
|----|--------|-------------------------------------------------|------------|------------|---------------------------|
| 1  |        |                                                 |            |            |                           |
| 2  | Gabon  | Drowning                                        | 0 (0 to 0) | 0 (0 to 0) | -14% (-21.3% to -6.3%)    |
| 3  | Gabon  | Environmental heat and cold exposure            | 0 (0 to 0) | 0 (0 to 0) | -7.5% (-12.2% to -1.5%)   |
| 4  | Gabon  | Executions and police conflict                  | 0 (0 to 0) | 0 (0 to 0) | NA                        |
| 5  | Gabon  | Exposure to forces of nature                    | 0 (0 to 0) | 0 (0 to 0) | NA                        |
| 6  | Gabon  | Falls                                           | 1 (1 to 2) | 1 (1 to 2) | 13.3% (9% to 17.1%)       |
| 7  | Gabon  | Fire, heat, and hot substances                  | 0 (0 to 0) | 0 (0 to 0) | -11% (-14.9% to -6.5%)    |
| 8  | Gabon  | Foreign body in eyes                            | 0 (0 to 0) | 0 (0 to 0) | 0% (0% to 0%)             |
| 9  | Gabon  | Foreign body in other body part                 | 0 (0 to 1) | 0 (0 to 1) | -2.2% (-5.9% to 1.1%)     |
| 10 | Gabon  | Motor vehicle road injuries                     | 1 (0 to 1) | 1 (0 to 1) | -3.1% (-8.4% to 3.8%)     |
| 11 | Gabon  | Motorcyclist road injuries                      | 0 (0 to 0) | 0 (0 to 0) | -6% (-14% to 3.4%)        |
| 12 | Gabon  | Non-venomous animal contact                     | 0 (0 to 0) | 0 (0 to 0) | -5.2% (-9.9% to -0.5%)    |
| 13 | Gabon  | Other exposure to mechanical forces             | 0 (0 to 0) | 0 (0 to 0) | -14.4% (-20% to -9%)      |
| 14 | Gabon  | Other road injuries                             | 0 (0 to 0) | 0 (0 to 0) | 3.2% (-4.8% to 12.5%)     |
| 15 | Gabon  | Other transport injuries                        | 0 (0 to 0) | 0 (0 to 0) | -11.6% (-15.7% to -7.5%)  |
| 16 | Gabon  | Other unintentional injuries                    | 0 (0 to 0) | 0 (0 to 0) | -13.5% (-19% to -7.8%)    |
| 17 | Gabon  | Pedestrian road injuries                        | 1 (0 to 1) | 0 (0 to 1) | -18.2% (-23.7% to -12.3%) |
| 18 | Gabon  | Physical violence by firearm                    | 0 (0 to 0) | 0 (0 to 0) | 13.8% (2.3% to 27%)       |
| 19 | Gabon  | Physical violence by other means                | 0 (0 to 0) | 0 (0 to 0) | -15.2% (-21% to -9.4%)    |
| 20 | Gabon  | Physical violence by sharp object               | 0 (0 to 0) | 0 (0 to 0) | -14.1% (-19.4% to -9%)    |
| 21 | Gabon  | Poisoning by carbon monoxide                    | 0 (0 to 0) | 0 (0 to 0) | 15.8% (4.6% to 29.3%)     |
| 22 | Gabon  | Poisoning by other means                        | 0 (0 to 0) | 0 (0 to 0) | -16.6% (-22.4% to -9.2%)  |
| 23 | Gabon  | Pulmonary aspiration and foreign body in airway | 0 (0 to 0) | 0 (0 to 0) | -11.9% (-20.1% to -2.2%)  |
| 24 | Gabon  | Self-harm by firearm                            | 0 (0 to 0) | 0 (0 to 0) | 0.3% (-10.1% to 12.3%)    |
| 25 | Gabon  | Self-harm by other specified means              | 0 (0 to 0) | 0 (0 to 0) | -13.2% (-17.9% to -7.8%)  |
| 26 | Gabon  | Unintentional firearm injuries                  | 0 (0 to 0) | 0 (0 to 0) | -12.5% (-18.1% to -6.7%)  |
| 27 | Gabon  | Venomous animal contact                         | 0 (0 to 0) | 0 (0 to 0) | -1.9% (-8.4% to 5.1%)     |
| 28 | Gambia | Adverse effects of medical treatment            | 0 (0 to 0) | 0 (0 to 0) | 0% (0% to 0%)             |
| 29 | Gambia | Conflict and terrorism                          | 0 (0 to 0) | 0 (0 to 0) | NA                        |
| 30 | Gambia | Cyclist road injuries                           | 1 (0 to 2) | 1 (0 to 2) | 14.4% (7.4% to 22.1%)     |
| 31 | Gambia | Drowning                                        | 0 (0 to 0) | 0 (0 to 0) | -1.3% (-8.6% to 6.3%)     |
| 32 | Gambia | Environmental heat and cold exposure            | 0 (0 to 0) | 0 (0 to 0) | -2.6% (-7.3% to 2.5%)     |
| 33 | Gambia | Executions and police conflict                  | 0 (0 to 0) | 0 (0 to 0) | NA                        |
| 34 | Gambia | Exposure to forces of nature                    | 0 (0 to 0) | 0 (0 to 0) | NA                        |
| 35 | Gambia | Falls                                           | 3 (2 to 4) | 3 (2 to 5) | 21.9% (17.4% to 26.7%)    |
| 36 | Gambia | Fire, heat, and hot substances                  | 0 (0 to 0) | 0 (0 to 0) | -1.3% (-6.3% to 3.5%)     |
| 37 | Gambia | Foreign body in eyes                            | 0 (0 to 0) | 0 (0 to 0) | 0% (0% to 0%)             |
| 38 | Gambia | Foreign body in other body part                 | 1 (0 to 1) | 1 (0 to 1) | 3.3% (-0.3% to 7.4%)      |
| 39 | Gambia | Motor vehicle road injuries                     | 1 (1 to 2) | 1 (1 to 3) | 10.2% (2% to 18.3%)       |
| 40 | Gambia | Motorcyclist road injuries                      | 1 (0 to 1) | 1 (0 to 1) | 14.4% (6.3% to 23.2%)     |
| 41 | Gambia | Non-venomous animal contact                     | 0 (0 to 0) | 0 (0 to 0) | -3.8% (-7.9% to 0.5%)     |
| 42 | Gambia | Other exposure to mechanical forces             | 0 (0 to 0) | 0 (0 to 0) | -11.1% (-15.5% to -6.6%)  |
| 43 | Gambia | Other road injuries                             | 0 (0 to 0) | 0 (0 to 0) | 3% (-4.8% to 11.3%)       |
| 44 | Gambia | Other transport injuries                        | 0 (0 to 0) | 0 (0 to 0) | -1.7% (-5.9% to 2.9%)     |
| 45 |        |                                                 |            |            |                           |
| 46 |        |                                                 |            |            |                           |

|    |         |                                                 |            |            |                           |
|----|---------|-------------------------------------------------|------------|------------|---------------------------|
| 1  |         |                                                 |            |            |                           |
| 2  | Gambia  | Other unintentional injuries                    | 0 (0 to 0) | 0 (0 to 0) | -5.3% (-9.9% to -0.3%)    |
| 3  | Gambia  | Pedestrian road injuries                        | 2 (1 to 3) | 2 (1 to 3) | 4.6% (-2.1% to 11%)       |
| 4  | Gambia  | Physical violence by firearm                    | 0 (0 to 0) | 0 (0 to 0) | 42.8% (22.4% to 66%)      |
| 5  | Gambia  | Physical violence by other means                | 0 (0 to 0) | 0 (0 to 0) | 2.1% (-2.4% to 6.6%)      |
| 6  | Gambia  | Physical violence by sharp object               | 0 (0 to 0) | 0 (0 to 0) | -0.5% (-5.9% to 4.7%)     |
| 7  | Gambia  | Poisoning by carbon monoxide                    | 0 (0 to 0) | 0 (0 to 0) | 10.6% (-1.5% to 23.6%)    |
| 8  | Gambia  | Poisoning by other means                        | 0 (0 to 0) | 0 (0 to 0) | -12.1% (-18.5% to -5.2%)  |
| 9  | Gambia  | Pulmonary aspiration and foreign body in airway | 0 (0 to 0) | 0 (0 to 0) | 9.7% (1.9% to 18.7%)      |
| 10 | Gambia  | Self-harm by firearm                            | 0 (0 to 0) | 0 (0 to 0) | 19.4% (7.5% to 32.2%)     |
| 11 | Gambia  | Self-harm by other specified means              | 0 (0 to 0) | 0 (0 to 0) | 17.2% (11.9% to 22.3%)    |
| 12 | Gambia  | Unintentional firearm injuries                  | 0 (0 to 0) | 0 (0 to 0) | -11.3% (-17.9% to -4.1%)  |
| 13 | Gambia  | Venomous animal contact                         | 0 (0 to 0) | 0 (0 to 0) | -3.3% (-9.9% to 3.9%)     |
| 14 | Georgia | Adverse effects of medical treatment            | 0 (0 to 0) | 0 (0 to 0) | 0% (0% to 0%)             |
| 15 | Georgia | Conflict and terrorism                          | 0 (0 to 0) | 0 (0 to 0) | NA                        |
| 16 | Georgia | Cyclist road injuries                           | 0 (0 to 0) | 0 (0 to 0) | -17.6% (-26.4% to -7.2%)  |
| 17 | Georgia | Drowning                                        | 0 (0 to 0) | 0 (0 to 0) | -18.3% (-28% to -8.1%)    |
| 18 | Georgia | Environmental heat and cold exposure            | 0 (0 to 0) | 0 (0 to 0) | -9.9% (-17.9% to -0.1%)   |
| 19 | Georgia | Executions and police conflict                  | 0 (0 to 0) | 0 (0 to 0) | NA                        |
| 20 | Georgia | Exposure to forces of nature                    | 0 (0 to 0) | 0 (0 to 0) | NA                        |
| 21 | Georgia | Falls                                           | 4 (3 to 5) | 5 (4 to 6) | 24.8% (18.5% to 31.8%)    |
| 22 | Georgia | Fire, heat, and hot substances                  | 0 (0 to 0) | 0 (0 to 0) | -25.3% (-31.4% to -18.9%) |
| 23 | Georgia | Foreign body in eyes                            | 0 (0 to 0) | 0 (0 to 0) | 0% (0% to 0%)             |
| 24 | Georgia | Foreign body in other body part                 | 0 (0 to 0) | 0 (0 to 0) | -32.6% (-38% to -28%)     |
| 25 | Georgia | Motor vehicle road injuries                     | 1 (1 to 2) | 1 (1 to 2) | -11.4% (-19.3% to -1.4%)  |
| 26 | Georgia | Motocyclist road injuries                       | 0 (0 to 0) | 0 (0 to 0) | -25.2% (-36% to -12.3%)   |
| 27 | Georgia | Non-venomous animal contact                     | 0 (0 to 0) | 0 (0 to 0) | -13.5% (-23.7% to -0.6%)  |
| 28 | Georgia | Other exposure to mechanical forces             | 1 (0 to 1) | 1 (0 to 2) | 15.1% (6.7% to 25%)       |
| 29 | Georgia | Other road injuries                             | 0 (0 to 0) | 0 (0 to 0) | 6.4% (-5.3% to 20.4%)     |
| 30 | Georgia | Other transport injuries                        | 0 (0 to 0) | 0 (0 to 0) | 13.8% (2.3% to 27.1%)     |
| 31 | Georgia | Other unintentional injuries                    | 0 (0 to 0) | 0 (0 to 0) | 16.2% (8.2% to 24.8%)     |
| 32 | Georgia | Pedestrian road injuries                        | 0 (0 to 0) | 0 (0 to 1) | 10% (-2.1% to 25.1%)      |
| 33 | Georgia | Physical violence by firearm                    | 0 (0 to 0) | 0 (0 to 0) | -45% (-55.3% to -34.7%)   |
| 34 | Georgia | Physical violence by other means                | 0 (0 to 0) | 0 (0 to 0) | -20.9% (-30.6% to -11%)   |
| 35 | Georgia | Physical violence by sharp object               | 0 (0 to 0) | 0 (0 to 0) | -2.2% (-14.8% to 14%)     |
| 36 | Georgia | Poisoning by carbon monoxide                    | 0 (0 to 0) | 0 (0 to 0) | 9.2% (-6.5% to 29.8%)     |
| 37 | Georgia | Poisoning by other means                        | 0 (0 to 0) | 0 (0 to 0) | 24.4% (10.4% to 41.8%)    |
| 38 | Georgia | Pulmonary aspiration and foreign body in airway | 0 (0 to 0) | 0 (0 to 0) | 19.6% (6% to 33.6%)       |
| 39 | Georgia | Self-harm by firearm                            | 0 (0 to 0) | 0 (0 to 0) | 53.6% (31.7% to 91.7%)    |
| 40 | Georgia | Self-harm by other specified means              | 0 (0 to 0) | 0 (0 to 0) | 19.5% (12.8% to 27.6%)    |
| 41 | Georgia | Unintentional firearm injuries                  | 0 (0 to 0) | 0 (0 to 0) | -1.8% (-13.9% to 11.7%)   |
| 42 | Georgia | Venomous animal contact                         | 0 (0 to 0) | 0 (0 to 0) | -17.5% (-29.6% to -1.5%)  |
| 43 | Germany | Adverse effects of medical treatment            | 0 (0 to 0) | 0 (0 to 0) | 0% (0% to 0%)             |
| 44 | Germany | Conflict and terrorism                          | 0 (0 to 0) | 0 (0 to 0) | NA                        |
| 45 |         |                                                 |            |            |                           |
| 46 |         |                                                 |            |            |                           |

|    |         |                                                 |            |            |                           |
|----|---------|-------------------------------------------------|------------|------------|---------------------------|
| 1  |         |                                                 |            |            |                           |
| 2  | Germany | Cyclist road injuries                           | 0 (0 to 0) | 0 (0 to 0) | -33% (-43.1% to -22.3%)   |
| 3  | Germany | Drowning                                        | 0 (0 to 0) | 0 (0 to 0) | 58.1% (41.9% to 77.2%)    |
| 4  | Germany | Environmental heat and cold exposure            | 0 (0 to 0) | 0 (0 to 0) | -2% (-6.4% to 2.5%)       |
| 5  | Germany | Executions and police conflict                  | 0 (0 to 0) | 0 (0 to 0) | NA                        |
| 6  | Germany | Exposure to forces of nature                    | 0 (0 to 0) | 0 (0 to 0) | NA                        |
| 7  | Germany | Falls                                           | 6 (4 to 8) | 6 (5 to 9) | 10% (5.3% to 14.6%)       |
| 8  | Germany | Fire, heat, and hot substances                  | 0 (0 to 0) | 0 (0 to 0) | -10% (-15.3% to -5.2%)    |
| 9  | Germany | Foreign body in eyes                            | 0 (0 to 0) | 0 (0 to 0) | 0% (0% to 0%)             |
| 10 | Germany | Foreign body in other body part                 | 0 (0 to 0) | 0 (0 to 0) | 1.5% (-2.3% to 5.3%)      |
| 11 | Germany | Motor vehicle road injuries                     | 1 (0 to 1) | 0 (0 to 1) | -53% (-60.9% to -45%)     |
| 12 | Germany | Motorcyclist road injuries                      | 0 (0 to 0) | 0 (0 to 0) | -26.2% (-40.9% to -8.8%)  |
| 13 | Germany | Non-venomous animal contact                     | 0 (0 to 0) | 0 (0 to 0) | -10.7% (-14.6% to -6.4%)  |
| 14 | Germany | Other exposure to mechanical forces             | 0 (0 to 1) | 0 (0 to 1) | -0.8% (-6.9% to 4.1%)     |
| 15 | Germany | Other road injuries                             | 0 (0 to 0) | 0 (0 to 0) | -17.3% (-29.2% to -3.7%)  |
| 16 | Germany | Other transport injuries                        | 0 (0 to 0) | 0 (0 to 0) | -5.8% (-10.6% to -0.9%)   |
| 17 | Germany | Other unintentional injuries                    | 0 (0 to 0) | 0 (0 to 0) | -7.8% (-12.5% to -3.4%)   |
| 18 | Germany | Pedestrian road injuries                        | 0 (0 to 0) | 0 (0 to 0) | -42% (-51.9% to -30.6%)   |
| 19 | Germany | Physical violence by firearm                    | 0 (0 to 0) | 0 (0 to 0) | 30.3% (17.3% to 46.7%)    |
| 20 | Germany | Physical violence by other means                | 0 (0 to 0) | 0 (0 to 0) | -17.5% (-24.8% to -10.6%) |
| 21 | Germany | Physical violence by sharp object               | 0 (0 to 0) | 0 (0 to 0) | -23.3% (-32.8% to -14.4%) |
| 22 | Germany | Poisoning by carbon monoxide                    | 0 (0 to 0) | 0 (0 to 0) | 10.2% (2.7% to 18.5%)     |
| 23 | Germany | Poisoning by other means                        | 0 (0 to 0) | 0 (0 to 0) | -1.9% (-7% to 4.3%)       |
| 24 | Germany | Pulmonary aspiration and foreign body in airway | 0 (0 to 0) | 0 (0 to 0) | -10.2% (-17.9% to -2.4%)  |
| 25 | Germany | Self-harm by firearm                            | 0 (0 to 0) | 0 (0 to 0) | -5% (-16.4% to 8.8%)      |
| 26 | Germany | Self-harm by other specified means              | 0 (0 to 1) | 0 (0 to 0) | -24.7% (-28.7% to -20.5%) |
| 27 | Germany | Unintentional firearm injuries                  | 0 (0 to 0) | 0 (0 to 0) | 2.5% (-4.5% to 9.8%)      |
| 28 | Germany | Venomous animal contact                         | 0 (0 to 0) | 0 (0 to 0) | -13% (-18.6% to -6.4%)    |
| 29 | Ghana   | Adverse effects of medical treatment            | 0 (0 to 0) | 0 (0 to 0) | 0% (0% to 0%)             |
| 30 | Ghana   | Conflict and terrorism                          | 0 (0 to 0) | 0 (0 to 0) | NA                        |
| 31 | Ghana   | Cyclist road injuries                           | 1 (1 to 3) | 2 (1 to 3) | 28.2% (19.9% to 38.7%)    |
| 32 | Ghana   | Drowning                                        | 0 (0 to 0) | 0 (0 to 0) | 13.8% (4.2% to 23.6%)     |
| 33 | Ghana   | Environmental heat and cold exposure            | 0 (0 to 0) | 0 (0 to 0) | 1.4% (-3.2% to 6.4%)      |
| 34 | Ghana   | Executions and police conflict                  | 0 (0 to 0) | 0 (0 to 0) | NA                        |
| 35 | Ghana   | Exposure to forces of nature                    | 0 (0 to 0) | 0 (0 to 0) | NA                        |
| 36 | Ghana   | Falls                                           | 3 (2 to 4) | 4 (3 to 5) | 26.3% (21.4% to 31.2%)    |
| 37 | Ghana   | Fire, heat, and hot substances                  | 0 (0 to 0) | 0 (0 to 0) | -2% (-6.4% to 2.7%)       |
| 38 | Ghana   | Foreign body in eyes                            | 0 (0 to 0) | 0 (0 to 0) | 0% (0% to 0%)             |
| 39 | Ghana   | Foreign body in other body part                 | 1 (0 to 1) | 1 (0 to 1) | 2.6% (-0.9% to 6.3%)      |
| 40 | Ghana   | Motor vehicle road injuries                     | 2 (1 to 3) | 2 (1 to 4) | 21.5% (13.1% to 31.9%)    |
| 41 | Ghana   | Motorcyclist road injuries                      | 0 (0 to 1) | 1 (0 to 1) | 45.7% (35.4% to 57.9%)    |
| 42 | Ghana   | Non-venomous animal contact                     | 0 (0 to 0) | 0 (0 to 0) | -12.6% (-16.7% to -8.7%)  |
| 43 | Ghana   | Other exposure to mechanical forces             | 0 (0 to 0) | 0 (0 to 0) | -2.2% (-7.6% to 3.3%)     |
| 44 | Ghana   | Other road injuries                             | 0 (0 to 0) | 0 (0 to 0) | 21.8% (12.6% to 33.8%)    |
| 45 |         |                                                 |            |            |                           |
| 46 |         |                                                 |            |            |                           |

|    |           |                                                 |            |            |                           |
|----|-----------|-------------------------------------------------|------------|------------|---------------------------|
| 1  |           |                                                 |            |            |                           |
| 2  | Ghana     | Other transport injuries                        | 0 (0 to 1) | 0 (0 to 1) | 1.3% (-2.9% to 5.5%)      |
| 3  | Ghana     | Other unintentional injuries                    | 0 (0 to 0) | 0 (0 to 0) | -5.5% (-11.2% to 0.1%)    |
| 4  | Ghana     | Pedestrian road injuries                        | 2 (1 to 4) | 3 (1 to 5) | 17.6% (10.5% to 25.7%)    |
| 5  | Ghana     | Physical violence by firearm                    | 0 (0 to 0) | 0 (0 to 0) | 40.3% (20.3% to 61.8%)    |
| 6  | Ghana     | Physical violence by other means                | 0 (0 to 0) | 0 (0 to 0) | -4.8% (-11.2% to 1.4%)    |
| 7  | Ghana     | Physical violence by sharp object               | 0 (0 to 0) | 0 (0 to 0) | -7.2% (-15.1% to 0%)      |
| 8  | Ghana     | Poisoning by carbon monoxide                    | 0 (0 to 0) | 0 (0 to 0) | 20.8% (8.1% to 34.3%)     |
| 9  | Ghana     | Poisoning by other means                        | 0 (0 to 0) | 0 (0 to 0) | -8.8% (-15.1% to -1.8%)   |
| 10 | Ghana     | Pulmonary aspiration and foreign body in airway | 0 (0 to 0) | 0 (0 to 0) | -5.6% (-12.9% to 2.3%)    |
| 11 | Ghana     | Self-harm by firearm                            | 0 (0 to 0) | 0 (0 to 0) | 27.8% (15.8% to 43.2%)    |
| 12 | Ghana     | Self-harm by other specified means              | 0 (0 to 0) | 0 (0 to 0) | 27.1% (20.8% to 34.7%)    |
| 13 | Ghana     | Unintentional firearm injuries                  | 0 (0 to 0) | 0 (0 to 0) | -11.3% (-18.9% to -3.5%)  |
| 14 | Ghana     | Venomous animal contact                         | 0 (0 to 0) | 0 (0 to 0) | -19.5% (-25.6% to -13%)   |
| 15 | Greece    | Adverse effects of medical treatment            | 0 (0 to 0) | 0 (0 to 0) | 0% (0% to 0%)             |
| 16 | Greece    | Conflict and terrorism                          | 0 (0 to 0) | 0 (0 to 0) | NA                        |
| 17 | Greece    | Cyclist road injuries                           | 0 (0 to 0) | 0 (0 to 0) | -10.4% (-21.7% to 3.1%)   |
| 18 | Greece    | Drowning                                        | 0 (0 to 0) | 0 (0 to 0) | 67.6% (53.4% to 85.1%)    |
| 19 | Greece    | Environmental heat and cold exposure            | 0 (0 to 0) | 0 (0 to 0) | -4.7% (-9.3% to 0.1%)     |
| 20 | Greece    | Executions and police conflict                  | 0 (0 to 0) | 0 (0 to 0) | NA                        |
| 21 | Greece    | Exposure to forces of nature                    | 0 (0 to 0) | 0 (0 to 0) | NA                        |
| 22 | Greece    | Falls                                           | 5 (4 to 6) | 4 (3 to 6) | -7.7% (-12.8% to -2.8%)   |
| 23 | Greece    | Fire, heat, and hot substances                  | 0 (0 to 0) | 0 (0 to 0) | -18.4% (-23.3% to -13.8%) |
| 24 | Greece    | Foreign body in eyes                            | 0 (0 to 0) | 0 (0 to 0) | 0% (0% to 0%)             |
| 25 | Greece    | Foreign body in other body part                 | 0 (0 to 0) | 0 (0 to 0) | 0.4% (-3.6% to 3.8%)      |
| 26 | Greece    | Motor vehicle road injuries                     | 1 (0 to 1) | 0 (0 to 1) | -44.7% (-52.6% to -37.4%) |
| 27 | Greece    | Motorcyclist road injuries                      | 0 (0 to 0) | 0 (0 to 0) | 16.3% (-5.5% to 39.4%)    |
| 28 | Greece    | Non-venomous animal contact                     | 0 (0 to 0) | 0 (0 to 0) | -7.4% (-11.3% to -3.5%)   |
| 29 | Greece    | Other exposure to mechanical forces             | 0 (0 to 1) | 1 (0 to 1) | 7.1% (2.2% to 13%)        |
| 30 | Greece    | Other road injuries                             | 0 (0 to 0) | 0 (0 to 0) | -9.5% (-21.4% to 3.9%)    |
| 31 | Greece    | Other transport injuries                        | 0 (0 to 0) | 0 (0 to 0) | 12.7% (7.1% to 19.6%)     |
| 32 | Greece    | Other unintentional injuries                    | 0 (0 to 0) | 0 (0 to 0) | -23% (-29.7% to -17.8%)   |
| 33 | Greece    | Pedestrian road injuries                        | 0 (0 to 0) | 0 (0 to 0) | -39.6% (-47.9% to -30.2%) |
| 34 | Greece    | Physical violence by firearm                    | 0 (0 to 0) | 0 (0 to 0) | 9.8% (0.2% to 21.5%)      |
| 35 | Greece    | Physical violence by other means                | 0 (0 to 0) | 0 (0 to 0) | -4.9% (-10.9% to 2%)      |
| 36 | Greece    | Physical violence by sharp object               | 0 (0 to 0) | 0 (0 to 0) | -11.6% (-19.1% to -3.9%)  |
| 37 | Greece    | Poisoning by carbon monoxide                    | 0 (0 to 0) | 0 (0 to 0) | 4.8% (-3.1% to 12.6%)     |
| 38 | Greece    | Poisoning by other means                        | 0 (0 to 0) | 0 (0 to 0) | -7.7% (-13.8% to -2.4%)   |
| 39 | Greece    | Pulmonary aspiration and foreign body in airway | 0 (0 to 0) | 0 (0 to 0) | -38.4% (-45.2% to -29.6%) |
| 40 | Greece    | Self-harm by firearm                            | 0 (0 to 0) | 0 (0 to 0) | 8.9% (-0.3% to 20.4%)     |
| 41 | Greece    | Self-harm by other specified means              | 0 (0 to 0) | 0 (0 to 0) | 4.5% (0% to 10%)          |
| 42 | Greece    | Unintentional firearm injuries                  | 0 (0 to 0) | 0 (0 to 0) | -12.5% (-19% to -6.2%)    |
| 43 | Greece    | Venomous animal contact                         | 0 (0 to 0) | 0 (0 to 0) | -6.8% (-12.6% to -1.1%)   |
| 44 | Greenland | Adverse effects of medical treatment            | 0 (0 to 0) | 0 (0 to 0) | 0% (0% to 0%)             |
| 45 |           |                                                 |            |            |                           |
| 46 |           |                                                 |            |            |                           |

|    |           |                                                 |               |               |                           |
|----|-----------|-------------------------------------------------|---------------|---------------|---------------------------|
| 1  |           |                                                 |               |               |                           |
| 2  | Greenland | Conflict and terrorism                          | 0 (0 to 0)    | 0 (0 to 0)    | NA                        |
| 3  | Greenland | Cyclist road injuries                           | 0 (0 to 1)    | 0 (0 to 1)    | -17.5% (-26.2% to -7.9%)  |
| 4  | Greenland | Drowning                                        | 0 (0 to 0)    | 0 (0 to 0)    | -0.1% (-8.3% to 7.7%)     |
| 5  | Greenland | Environmental heat and cold exposure            | 0 (0 to 0)    | 0 (0 to 0)    | -27.9% (-31.5% to -24.4%) |
| 6  | Greenland | Executions and police conflict                  | 0 (0 to 0)    | 0 (0 to 0)    | NA                        |
| 7  | Greenland | Exposure to forces of nature                    | 0 (0 to 0)    | 0 (0 to 0)    | NA                        |
| 8  | Greenland | Falls                                           | 26 (17 to 37) | 23 (15 to 34) | -10.4% (-13.6% to -6.7%)  |
| 9  | Greenland | Fire, heat, and hot substances                  | 1 (0 to 1)    | 0 (0 to 1)    | -40.3% (-43.5% to -36.9%) |
| 10 | Greenland | Foreign body in eyes                            | 0 (0 to 0)    | 0 (0 to 0)    | 0% (0% to 0%)             |
| 11 | Greenland | Foreign body in other body part                 | 1 (0 to 1)    | 1 (0 to 1)    | 0.8% (-2.5% to 4%)        |
| 12 | Greenland | Motor vehicle road injuries                     | 1 (1 to 2)    | 1 (0 to 1)    | -25.9% (-32% to -19.2%)   |
| 13 | Greenland | Motorcyclist road injuries                      | 0 (0 to 1)    | 0 (0 to 1)    | -11.9% (-20.6% to -2.6%)  |
| 14 | Greenland | Non-venomous animal contact                     | 0 (0 to 1)    | 0 (0 to 0)    | -33.3% (-39.6% to -27.7%) |
| 15 | Greenland | Other exposure to mechanical forces             | 1 (1 to 2)    | 1 (0 to 2)    | -35% (-39.7% to -30.4%)   |
| 16 | Greenland | Other road injuries                             | 0 (0 to 0)    | 0 (0 to 0)    | -26.8% (-36.7% to -16.4%) |
| 17 | Greenland | Other transport injuries                        | 4 (2 to 7)    | 3 (2 to 4)    | -37.2% (-40.6% to -33.4%) |
| 18 | Greenland | Other unintentional injuries                    | 2 (1 to 3)    | 1 (1 to 2)    | -25% (-29.7% to -20.5%)   |
| 19 | Greenland | Pedestrian road injuries                        | 0 (0 to 1)    | 0 (0 to 0)    | -40.6% (-47.6% to -32.7%) |
| 20 | Greenland | Physical violence by firearm                    | 0 (0 to 0)    | 0 (0 to 0)    | 2.2% (-9.2% to 16.6%)     |
| 21 | Greenland | Physical violence by other means                | 1 (0 to 1)    | 1 (0 to 1)    | -28.4% (-32.9% to -23.2%) |
| 22 | Greenland | Physical violence by sharp object               | 0 (0 to 0)    | 0 (0 to 0)    | -33.3% (-40% to -25.1%)   |
| 23 | Greenland | Poisoning by carbon monoxide                    | 0 (0 to 0)    | 0 (0 to 0)    | -29.4% (-38.4% to -19.5%) |
| 24 | Greenland | Poisoning by other means                        | 0 (0 to 0)    | 0 (0 to 0)    | -31.6% (-37% to -26.3%)   |
| 25 | Greenland | Pulmonary aspiration and foreign body in airway | 0 (0 to 0)    | 0 (0 to 0)    | -24.3% (-30.1% to -19%)   |
| 26 | Greenland | Self-harm by firearm                            | 0 (0 to 0)    | 0 (0 to 0)    | -40.4% (-48.6% to -31.3%) |
| 27 | Greenland | Self-harm by other specified means              | 1 (0 to 2)    | 1 (0 to 1)    | -25.6% (-29% to -21.5%)   |
| 28 | Greenland | Unintentional firearm injuries                  | 0 (0 to 0)    | 0 (0 to 0)    | -59.9% (-66.3% to -53.7%) |
| 29 | Greenland | Venomous animal contact                         | 0 (0 to 0)    | 0 (0 to 0)    | 4.6% (-3.4% to 15.4%)     |
| 30 | Grenada   | Adverse effects of medical treatment            | 0 (0 to 0)    | 0 (0 to 0)    | 0% (0% to 0%)             |
| 31 | Grenada   | Conflict and terrorism                          | 0 (0 to 0)    | 0 (0 to 0)    | NA                        |
| 32 | Grenada   | Cyclist road injuries                           | 0 (0 to 1)    | 0 (0 to 0)    | -16.5% (-24.1% to -7%)    |
| 33 | Grenada   | Drowning                                        | 0 (0 to 0)    | 0 (0 to 0)    | 24.1% (11.2% to 37.3%)    |
| 34 | Grenada   | Environmental heat and cold exposure            | 0 (0 to 1)    | 0 (0 to 1)    | 8.9% (4.8% to 13.2%)      |
| 35 | Grenada   | Executions and police conflict                  | 0 (0 to 0)    | 0 (0 to 0)    | NA                        |
| 36 | Grenada   | Exposure to forces of nature                    | 0 (0 to 0)    | 0 (0 to 0)    | NA                        |
| 37 | Grenada   | Falls                                           | 1 (1 to 2)    | 2 (1 to 3)    | 68% (62% to 74.9%)        |
| 38 | Grenada   | Fire, heat, and hot substances                  | 0 (0 to 0)    | 0 (0 to 0)    | -11.7% (-17.1% to -5.6%)  |
| 39 | Grenada   | Foreign body in eyes                            | 0 (0 to 0)    | 0 (0 to 0)    | 0% (0% to 0%)             |
| 40 | Grenada   | Foreign body in other body part                 | 0 (0 to 0)    | 0 (0 to 0)    | -0.6% (-4.7% to 3.8%)     |
| 41 | Grenada   | Motor vehicle road injuries                     | 0 (0 to 1)    | 0 (0 to 1)    | -17% (-25% to -7.6%)      |
| 42 | Grenada   | Motorcyclist road injuries                      | 0 (0 to 0)    | 0 (0 to 0)    | 17.6% (4.3% to 35.9%)     |
| 43 | Grenada   | Non-venomous animal contact                     | 0 (0 to 0)    | 0 (0 to 0)    | 21.2% (9.3% to 37.8%)     |
| 44 | Grenada   | Other exposure to mechanical forces             | 0 (0 to 1)    | 1 (0 to 1)    | 41.4% (29.5% to 56.8%)    |
| 45 |           |                                                 |               |               |                           |
| 46 |           |                                                 |               |               |                           |



|    |         |                                                 |            |            |                           |
|----|---------|-------------------------------------------------|------------|------------|---------------------------|
| 1  |         |                                                 |            |            |                           |
| 2  | Grenada | Other road injuries                             | 0 (0 to 0) | 0 (0 to 0) | -10.8% (-20.2% to -0.2%)  |
| 3  | Grenada | Other transport injuries                        | 0 (0 to 0) | 0 (0 to 0) | 20.5% (13.4% to 28.6%)    |
| 4  | Grenada | Other unintentional injuries                    | 0 (0 to 0) | 0 (0 to 0) | -3.6% (-8.6% to 1.5%)     |
| 5  | Grenada | Pedestrian road injuries                        | 0 (0 to 0) | 0 (0 to 0) | -24.7% (-32% to -16.3%)   |
| 6  | Grenada | Physical violence by firearm                    | 0 (0 to 0) | 0 (0 to 0) | 50.8% (34.4% to 74.4%)    |
| 7  | Grenada | Physical violence by other means                | 0 (0 to 0) | 0 (0 to 0) | 71.1% (52% to 96.7%)      |
| 8  | Grenada | Physical violence by sharp object               | 0 (0 to 0) | 0 (0 to 0) | 9.4% (-3.5% to 24.2%)     |
| 9  | Grenada | Poisoning by carbon monoxide                    | 0 (0 to 0) | 0 (0 to 0) | 30.3% (9.8% to 52.8%)     |
| 10 | Grenada | Poisoning by other means                        | 0 (0 to 0) | 0 (0 to 0) | -32.7% (-43.7% to -21.9%) |
| 11 | Grenada | Pulmonary aspiration and foreign body in airway | 0 (0 to 0) | 0 (0 to 0) | -24.6% (-31.2% to -18%)   |
| 12 | Grenada | Self-harm by firearm                            | 0 (0 to 0) | 0 (0 to 0) | 7.7% (-3.5% to 21.7%)     |
| 13 | Grenada | Self-harm by other specified means              | 0 (0 to 0) | 0 (0 to 0) | -15.2% (-22.8% to -7.8%)  |
| 14 | Grenada | Unintentional firearm injuries                  | 0 (0 to 0) | 0 (0 to 1) | 6.7% (-7.4% to 18.5%)     |
| 15 | Guam    | Venomous animal contact                         | 0 (0 to 0) | 0 (0 to 0) | -8.1% (-16.2% to 0.1%)    |
| 16 | Guam    | Adverse effects of medical treatment            | 0 (0 to 0) | 0 (0 to 0) | 0% (0% to 0%)             |
| 17 | Guam    | Conflict and terrorism                          | 0 (0 to 0) | 0 (0 to 0) | NA                        |
| 18 | Guam    | Cyclist road injuries                           | 0 (0 to 1) | 0 (0 to 1) | -5.8% (-14.1% to 3.2%)    |
| 19 | Guam    | Drowning                                        | 0 (0 to 0) | 0 (0 to 0) | 5.4% (-2.5% to 14.1%)     |
| 20 | Guam    | Environmental heat and cold exposure            | 0 (0 to 0) | 0 (0 to 0) | 0.6% (-5% to 6.8%)        |
| 21 | Guam    | Executions and police conflict                  | 0 (0 to 0) | 0 (0 to 0) | NA                        |
| 22 | Guam    | Exposure to forces of nature                    | 0 (0 to 0) | 0 (0 to 0) | NA                        |
| 23 | Guam    | Falls                                           | 4 (3 to 5) | 5 (3 to 7) | 29.1% (24.3% to 33.4%)    |
| 24 | Guam    | Fire, heat, and hot substances                  | 0 (0 to 0) | 0 (0 to 0) | 9.3% (3.9% to 15.2%)      |
| 25 | Guam    | Foreign body in eyes                            | 0 (0 to 0) | 0 (0 to 0) | 0% (0% to 0%)             |
| 26 | Guam    | Foreign body in other body part                 | 0 (0 to 0) | 0 (0 to 0) | -2.9% (-8.4% to 1.1%)     |
| 27 | Guam    | Motor vehicle road injuries                     | 1 (1 to 2) | 1 (0 to 2) | -36.4% (-42.6% to -30.4%) |
| 28 | Guam    | Motorcyclist road injuries                      | 1 (0 to 2) | 1 (0 to 2) | 6.3% (-3.9% to 19.6%)     |
| 29 | Guam    | Non-venomous animal contact                     | 0 (0 to 0) | 0 (0 to 0) | -9.1% (-12.8% to -4.9%)   |
| 30 | Guam    | Other exposure to mechanical forces             | 0 (0 to 0) | 0 (0 to 0) | -27.5% (-33.6% to -21.6%) |
| 31 | Guam    | Other road injuries                             | 0 (0 to 0) | 0 (0 to 0) | -8.4% (-17.8% to 2.4%)    |
| 32 | Guam    | Other transport injuries                        | 0 (0 to 1) | 0 (0 to 1) | -13.2% (-18.4% to -8.7%)  |
| 33 | Guam    | Other unintentional injuries                    | 0 (0 to 0) | 0 (0 to 0) | -6.5% (-11.4% to -1.6%)   |
| 34 | Guam    | Pedestrian road injuries                        | 1 (0 to 1) | 1 (0 to 1) | -21.6% (-29% to -13.8%)   |
| 35 | Guam    | Physical violence by firearm                    | 0 (0 to 0) | 0 (0 to 0) | -52.1% (-61.8% to -42.7%) |
| 36 | Guam    | Physical violence by other means                | 1 (0 to 1) | 1 (0 to 1) | -10.7% (-16.7% to -3.7%)  |
| 37 | Guam    | Physical violence by sharp object               | 0 (0 to 0) | 0 (0 to 0) | -50% (-57.6% to -42.9%)   |
| 38 | Guam    | Poisoning by carbon monoxide                    | 0 (0 to 0) | 0 (0 to 0) | 9.3% (0.3% to 18.8%)      |
| 39 | Guam    | Poisoning by other means                        | 0 (0 to 0) | 0 (0 to 0) | -7.6% (-14% to -1.7%)     |
| 40 | Guam    | Pulmonary aspiration and foreign body in airway | 0 (0 to 0) | 0 (0 to 0) | -2.6% (-11.5% to 7.9%)    |
| 41 | Guam    | Self-harm by firearm                            | 0 (0 to 0) | 0 (0 to 0) | -5.2% (-25% to 14.6%)     |
| 42 | Guam    | Self-harm by other specified means              | 0 (0 to 0) | 0 (0 to 0) | 27% (16.4% to 40.3%)      |
| 43 | Guam    | Unintentional firearm injuries                  | 0 (0 to 0) | 0 (0 to 0) | -26.8% (-36.2% to -19.5%) |
| 44 | Guam    | Venomous animal contact                         | 0 (0 to 0) | 0 (0 to 0) | -12.6% (-19% to -6.2%)    |

|    |           |                                                 |             |            |                           |
|----|-----------|-------------------------------------------------|-------------|------------|---------------------------|
| 1  |           |                                                 |             |            |                           |
| 2  | Guatemala | Adverse effects of medical treatment            | 0 (0 to 0)  | 0 (0 to 0) | 0% (0% to 0%)             |
| 3  | Guatemala | Conflict and terrorism                          | 5 (1 to 15) | 0 (0 to 0) | NA                        |
| 4  | Guatemala | Cyclist road injuries                           | 0 (0 to 0)  | 0 (0 to 0) | -11.7% (-18.6% to -2.8%)  |
| 5  | Guatemala | Drowning                                        | 0 (0 to 0)  | 0 (0 to 0) | -2% (-14.4% to 10.7%)     |
| 6  | Guatemala | Environmental heat and cold exposure            | 0 (0 to 0)  | 0 (0 to 0) | 41.8% (30.1% to 53.8%)    |
| 7  | Guatemala | Executions and police conflict                  | 0 (0 to 0)  | 0 (0 to 0) | NA                        |
| 8  | Guatemala | Exposure to forces of nature                    | 0 (0 to 0)  | 0 (0 to 0) | NA                        |
| 9  | Guatemala | Falls                                           | 2 (2 to 3)  | 3 (2 to 4) | 10.6% (6.7% to 14.9%)     |
| 10 | Guatemala | Fire, heat, and hot substances                  | 0 (0 to 0)  | 0 (0 to 0) | -31.5% (-37.3% to -25.2%) |
| 11 | Guatemala | Foreign body in eyes                            | 0 (0 to 0)  | 0 (0 to 0) | 0% (0% to 0%)             |
| 12 | Guatemala | Foreign body in other body part                 | 0 (0 to 0)  | 0 (0 to 0) | -42% (-48.1% to -35.9%)   |
| 13 | Guatemala | Motor vehicle road injuries                     | 0 (0 to 1)  | 0 (0 to 1) | 24.2% (13.6% to 37.8%)    |
| 14 | Guatemala | Motorcyclist road injuries                      | 0 (0 to 0)  | 0 (0 to 0) | 32.8% (19.7% to 49%)      |
| 15 | Guatemala | Non-venomous animal contact                     | 0 (0 to 0)  | 0 (0 to 0) | -18.5% (-22.7% to -14.9%) |
| 16 | Guatemala | Other exposure to mechanical forces             | 0 (0 to 1)  | 0 (0 to 1) | 48.5% (33.3% to 67.6%)    |
| 17 | Guatemala | Other road injuries                             | 0 (0 to 0)  | 0 (0 to 0) | -3.7% (-15.3% to 10.8%)   |
| 18 | Guatemala | Other transport injuries                        | 0 (0 to 0)  | 0 (0 to 0) | 38.1% (23.7% to 56.3%)    |
| 19 | Guatemala | Other unintentional injuries                    | 0 (0 to 0)  | 0 (0 to 0) | -17.5% (-22.8% to -11.9%) |
| 20 | Guatemala | Pedestrian road injuries                        | 0 (0 to 0)  | 0 (0 to 0) | -24.8% (-33.5% to -15.8%) |
| 21 | Guatemala | Physical violence by firearm                    | 0 (0 to 0)  | 0 (0 to 1) | 143.8% (82% to 235.9%)    |
| 22 | Guatemala | Physical violence by other means                | 1 (0 to 1)  | 0 (0 to 0) | -68.4% (-75.8% to -61.1%) |
| 23 | Guatemala | Physical violence by sharp object               | 0 (0 to 1)  | 0 (0 to 0) | -29.7% (-46% to -11.3%)   |
| 24 | Guatemala | Poisoning by carbon monoxide                    | 0 (0 to 0)  | 0 (0 to 0) | 40.5% (21.7% to 65.7%)    |
| 25 | Guatemala | Poisoning by other means                        | 0 (0 to 0)  | 0 (0 to 0) | -4.8% (-11.8% to 2.4%)    |
| 26 | Guatemala | Pulmonary aspiration and foreign body in airway | 0 (0 to 0)  | 0 (0 to 0) | -55.1% (-59.8% to -49.7%) |
| 27 | Guatemala | Self-harm by firearm                            | 0 (0 to 0)  | 0 (0 to 0) | -15.9% (-34.3% to -0.8%)  |
| 28 | Guatemala | Self-harm by other specified means              | 0 (0 to 0)  | 0 (0 to 0) | 28.7% (16.4% to 43.6%)    |
| 29 | Guatemala | Unintentional firearm injuries                  | 0 (0 to 0)  | 0 (0 to 1) | 91.4% (69.7% to 122%)     |
| 30 | Guatemala | Venomous animal contact                         | 0 (0 to 0)  | 0 (0 to 0) | -11% (-15.3% to -6.2%)    |
| 31 | Guinea    | Adverse effects of medical treatment            | 0 (0 to 0)  | 0 (0 to 0) | 0% (0% to 0%)             |
| 32 | Guinea    | Conflict and terrorism                          | 0 (0 to 0)  | 0 (0 to 0) | NA                        |
| 33 | Guinea    | Cyclist road injuries                           | 1 (0 to 2)  | 1 (1 to 3) | 23.6% (15.3% to 32.9%)    |
| 34 | Guinea    | Drowning                                        | 0 (0 to 0)  | 0 (0 to 0) | -8.6% (-15.1% to -2.6%)   |
| 35 | Guinea    | Environmental heat and cold exposure            | 0 (0 to 0)  | 0 (0 to 0) | 6.3% (1.4% to 12.5%)      |
| 36 | Guinea    | Executions and police conflict                  | 0 (0 to 0)  | 0 (0 to 0) | NA                        |
| 37 | Guinea    | Exposure to forces of nature                    | 0 (0 to 0)  | 0 (0 to 0) | NA                        |
| 38 | Guinea    | Falls                                           | 2 (2 to 3)  | 3 (2 to 4) | 18.1% (13.8% to 22.1%)    |
| 39 | Guinea    | Fire, heat, and hot substances                  | 0 (0 to 0)  | 0 (0 to 0) | -0.4% (-6.2% to 5.3%)     |
| 40 | Guinea    | Foreign body in eyes                            | 0 (0 to 0)  | 0 (0 to 0) | 0% (0% to 0%)             |
| 41 | Guinea    | Foreign body in other body part                 | 1 (0 to 1)  | 1 (0 to 1) | 0.3% (-3.5% to 4.4%)      |
| 42 | Guinea    | Motor vehicle road injuries                     | 2 (1 to 3)  | 2 (1 to 3) | 19.8% (10.7% to 30.1%)    |
| 43 | Guinea    | Motorcyclist road injuries                      | 1 (0 to 1)  | 1 (0 to 2) | 27.4% (16.9% to 39.1%)    |
| 44 | Guinea    | Non-venomous animal contact                     | 0 (0 to 0)  | 0 (0 to 0) | 4.2% (-0.3% to 9.3%)      |
| 45 |           |                                                 |             |            |                           |
| 46 |           |                                                 |             |            |                           |

|    |               |                                                 |            |            |                           |
|----|---------------|-------------------------------------------------|------------|------------|---------------------------|
| 1  |               |                                                 |            |            |                           |
| 2  | Guinea        | Other exposure to mechanical forces             | 0 (0 to 0) | 0 (0 to 0) | -9.4% (-14.3% to -4.9%)   |
| 3  | Guinea        | Other road injuries                             | 0 (0 to 0) | 0 (0 to 0) | 12.9% (3.8% to 23.1%)     |
| 4  | Guinea        | Other transport injuries                        | 0 (0 to 1) | 0 (0 to 1) | -1.4% (-5% to 2.4%)       |
| 5  | Guinea        | Other unintentional injuries                    | 0 (0 to 1) | 0 (0 to 0) | -11.2% (-15.2% to -6.6%)  |
| 6  | Guinea        | Pedestrian road injuries                        | 2 (1 to 3) | 2 (1 to 4) | 13.4% (5.8% to 20.9%)     |
| 7  | Guinea        | Physical violence by firearm                    | 0 (0 to 0) | 0 (0 to 0) | 29.1% (17.8% to 41.7%)    |
| 8  | Guinea        | Physical violence by other means                | 0 (0 to 0) | 0 (0 to 0) | 20.5% (13.2% to 28.4%)    |
| 9  | Guinea        | Physical violence by sharp object               | 0 (0 to 0) | 0 (0 to 0) | 18.3% (9.6% to 27.7%)     |
| 10 | Guinea        | Poisoning by carbon monoxide                    | 0 (0 to 0) | 0 (0 to 0) | 10.1% (-1.8% to 23.6%)    |
| 11 | Guinea        | Poisoning by other means                        | 0 (0 to 0) | 0 (0 to 0) | -15% (-21.5% to -8.6%)    |
| 12 | Guinea        | Pulmonary aspiration and foreign body in airway | 0 (0 to 0) | 0 (0 to 0) | -3.6% (-13.2% to 7%)      |
| 13 | Guinea        | Self-harm by firearm                            | 0 (0 to 0) | 0 (0 to 0) | 31.6% (18.9% to 49.1%)    |
| 14 | Guinea        | Self-harm by other specified means              | 0 (0 to 0) | 0 (0 to 0) | 29.5% (23.3% to 36.3%)    |
| 15 | Guinea        | Unintentional firearm injuries                  | 0 (0 to 0) | 0 (0 to 0) | -13.5% (-19.9% to -6.9%)  |
| 16 | Guinea-Bissau | Venomous animal contact                         | 0 (0 to 0) | 0 (0 to 0) | 6.3% (-0.5% to 13.9%)     |
| 17 | Guinea-Bissau | Adverse effects of medical treatment            | 0 (0 to 0) | 0 (0 to 0) | 0% (0% to 0%)             |
| 18 | Guinea-Bissau | Conflict and terrorism                          | 0 (0 to 0) | 0 (0 to 0) | NA                        |
| 19 | Guinea-Bissau | Cyclist road injuries                           | 1 (1 to 3) | 1 (1 to 3) | 7.2% (-0.6% to 15.4%)     |
| 20 | Guinea-Bissau | Drowning                                        | 0 (0 to 0) | 0 (0 to 0) | -22.8% (-27.9% to -17.1%) |
| 21 | Guinea-Bissau | Environmental heat and cold exposure            | 0 (0 to 0) | 0 (0 to 0) | -1.8% (-6.7% to 3.3%)     |
| 22 | Guinea-Bissau | Executions and police conflict                  | 0 (0 to 0) | 0 (0 to 0) | NA                        |
| 23 | Guinea-Bissau | Exposure to forces of nature                    | 0 (0 to 0) | 0 (0 to 0) | NA                        |
| 24 | Guinea-Bissau | Falls                                           | 3 (2 to 4) | 3 (2 to 4) | 8.7% (4.9% to 12.9%)      |
| 25 | Guinea-Bissau | Fire, heat, and hot substances                  | 0 (0 to 0) | 0 (0 to 0) | -11.8% (-16.9% to -6.4%)  |
| 26 | Guinea-Bissau | Foreign body in eyes                            | 0 (0 to 0) | 0 (0 to 0) | 0% (0% to 0%)             |
| 27 | Guinea-Bissau | Foreign body in other body part                 | 1 (0 to 1) | 1 (0 to 1) | -1.9% (-5.3% to 2%)       |
| 28 | Guinea-Bissau | Motor vehicle road injuries                     | 2 (1 to 4) | 2 (1 to 4) | 3.8% (-3.8% to 11.7%)     |
| 29 | Guinea-Bissau | Motorcyclist road injuries                      | 1 (0 to 2) | 1 (0 to 2) | -5.1% (-12.1% to 3.8%)    |
| 30 | Guinea-Bissau | Non-venomous animal contact                     | 0 (0 to 1) | 0 (0 to 0) | -7.8% (-11.9% to -3.7%)   |
| 31 | Guinea-Bissau | Other exposure to mechanical forces             | 0 (0 to 0) | 0 (0 to 0) | -13.7% (-18.7% to -8.7%)  |
| 32 | Guinea-Bissau | Other road injuries                             | 0 (0 to 0) | 0 (0 to 0) | 2.7% (-5.8% to 12.5%)     |
| 33 | Guinea-Bissau | Other transport injuries                        | 0 (0 to 1) | 0 (0 to 1) | -16% (-19.6% to -12.4%)   |
| 34 | Guinea-Bissau | Other unintentional injuries                    | 0 (0 to 1) | 0 (0 to 0) | -17.6% (-21.4% to -12.9%) |
| 35 | Guinea-Bissau | Pedestrian road injuries                        | 3 (1 to 5) | 2 (1 to 5) | -2.7% (-8.8% to 3.9%)     |
| 36 | Guinea-Bissau | Physical violence by firearm                    | 0 (0 to 0) | 0 (0 to 0) | 13.4% (4.3% to 24.8%)     |
| 37 | Guinea-Bissau | Physical violence by other means                | 0 (0 to 0) | 0 (0 to 0) | 11% (4.8% to 18%)         |
| 38 | Guinea-Bissau | Physical violence by sharp object               | 0 (0 to 0) | 0 (0 to 0) | 10.8% (3.5% to 19.7%)     |
| 39 | Guinea-Bissau | Poisoning by carbon monoxide                    | 0 (0 to 0) | 0 (0 to 0) | 10.8% (-2.1% to 24.5%)    |
| 40 | Guinea-Bissau | Poisoning by other means                        | 0 (0 to 0) | 0 (0 to 0) | -24.6% (-30.7% to -17.5%) |
| 41 | Guinea-Bissau | Pulmonary aspiration and foreign body in airway | 0 (0 to 0) | 0 (0 to 0) | -15.1% (-23.6% to -5.7%)  |
| 42 | Guinea-Bissau | Self-harm by firearm                            | 0 (0 to 0) | 0 (0 to 0) | 13.6% (1.8% to 27.4%)     |
| 43 | Guinea-Bissau | Self-harm by other specified means              | 0 (0 to 0) | 0 (0 to 0) | 8.2% (3.8% to 13.2%)      |
| 44 | Guinea-Bissau | Unintentional firearm injuries                  | 0 (0 to 0) | 0 (0 to 0) | -21.1% (-27.5% to -14.7%) |
| 45 |               |                                                 |            |            |                           |
| 46 |               |                                                 |            |            |                           |

|    |               |                                                 |            |            |                           |
|----|---------------|-------------------------------------------------|------------|------------|---------------------------|
| 1  |               |                                                 |            |            |                           |
| 2  | Guinea-Bissau | Venomous animal contact                         | 0 (0 to 0) | 0 (0 to 0) | -9.4% (-15.1% to -2.2%)   |
| 3  | Guyana        | Adverse effects of medical treatment            | 0 (0 to 0) | 0 (0 to 0) | 0% (0% to 0%)             |
| 4  | Guyana        | Conflict and terrorism                          | 0 (0 to 0) | 0 (0 to 0) | NA                        |
| 5  | Guyana        | Cyclist road injuries                           | 0 (0 to 0) | 0 (0 to 0) | -1.2% (-10.4% to 9.4%)    |
| 6  | Guyana        | Drowning                                        | 0 (0 to 0) | 0 (0 to 0) | 19.6% (8.5% to 32.2%)     |
| 7  | Guyana        | Environmental heat and cold exposure            | 0 (0 to 1) | 0 (0 to 1) | -1.5% (-6.1% to 2.8%)     |
| 8  | Guyana        | Executions and police conflict                  | 0 (0 to 0) | 0 (0 to 0) | NA                        |
| 9  | Guyana        | Exposure to forces of nature                    | 0 (0 to 0) | 0 (0 to 0) | NA                        |
| 10 | Guyana        | Falls                                           | 2 (1 to 3) | 2 (2 to 3) | 22.4% (17.9% to 27.2%)    |
| 11 | Guyana        | Fire, heat, and hot substances                  | 0 (0 to 0) | 0 (0 to 0) | -14.3% (-19.7% to -8.2%)  |
| 12 | Guyana        | Foreign body in eyes                            | 0 (0 to 0) | 0 (0 to 0) | 0% (0% to 0%)             |
| 13 | Guyana        | Foreign body in other body part                 | 0 (0 to 0) | 0 (0 to 0) | -29.1% (-33% to -24.5%)   |
| 14 | Guyana        | Motor vehicle road injuries                     | 0 (0 to 1) | 0 (0 to 1) | 20% (9.2% to 33.3%)       |
| 15 | Guyana        | Motorcyclist road injuries                      | 0 (0 to 0) | 0 (0 to 1) | 63.2% (45.6% to 85.6%)    |
| 16 | Guyana        | Non-venomous animal contact                     | 0 (0 to 0) | 0 (0 to 0) | 23.9% (6.9% to 38.9%)     |
| 17 | Guyana        | Other exposure to mechanical forces             | 0 (0 to 0) | 0 (0 to 1) | 28.3% (20.3% to 37.1%)    |
| 18 | Guyana        | Other road injuries                             | 0 (0 to 0) | 0 (0 to 0) | 6% (-4.4% to 17.9%)       |
| 19 | Guyana        | Other transport injuries                        | 0 (0 to 0) | 0 (0 to 0) | 25.1% (18% to 32.1%)      |
| 20 | Guyana        | Other unintentional injuries                    | 0 (0 to 0) | 0 (0 to 0) | -23.7% (-28.4% to -18.9%) |
| 21 | Guyana        | Pedestrian road injuries                        | 0 (0 to 0) | 0 (0 to 0) | -23.2% (-31.1% to -14.1%) |
| 22 | Guyana        | Physical violence by firearm                    | 0 (0 to 0) | 0 (0 to 0) | 137.2% (102.8% to 186.3%) |
| 23 | Guyana        | Physical violence by other means                | 0 (0 to 0) | 0 (0 to 0) | -5% (-16.3% to 5.8%)      |
| 24 | Guyana        | Physical violence by sharp object               | 0 (0 to 0) | 0 (0 to 0) | 56.3% (35% to 82.2%)      |
| 25 | Guyana        | Poisoning by carbon monoxide                    | 0 (0 to 0) | 0 (0 to 0) | 28.5% (10.3% to 51.3%)    |
| 26 | Guyana        | Poisoning by other means                        | 0 (0 to 0) | 0 (0 to 0) | -10.2% (-20.2% to 0.2%)   |
| 27 | Guyana        | Pulmonary aspiration and foreign body in airway | 0 (0 to 0) | 0 (0 to 0) | -28.2% (-35.8% to -19%)   |
| 28 | Guyana        | Self-harm by firearm                            | 0 (0 to 0) | 0 (0 to 0) | 24.5% (5.6% to 47.8%)     |
| 29 | Guyana        | Self-harm by other specified means              | 0 (0 to 0) | 0 (0 to 0) | 12% (5.2% to 20.4%)       |
| 30 | Guyana        | Unintentional firearm injuries                  | 0 (0 to 0) | 0 (0 to 0) | 21.2% (11.7% to 30.2%)    |
| 31 | Haiti         | Venomous animal contact                         | 0 (0 to 0) | 0 (0 to 0) | 89.2% (69% to 115.2%)     |
| 32 | Haiti         | Adverse effects of medical treatment            | 0 (0 to 0) | 0 (0 to 0) | 0% (0% to 0%)             |
| 33 | Haiti         | Conflict and terrorism                          | 0 (0 to 0) | 0 (0 to 0) | NA                        |
| 34 | Haiti         | Cyclist road injuries                           | 0 (0 to 0) | 0 (0 to 0) | -4% (-11% to 3.5%)        |
| 35 | Haiti         | Drowning                                        | 0 (0 to 0) | 0 (0 to 0) | -25.3% (-33% to -15.5%)   |
| 36 | Haiti         | Environmental heat and cold exposure            | 0 (0 to 1) | 0 (0 to 1) | -8.5% (-11.7% to -5.1%)   |
| 37 | Haiti         | Executions and police conflict                  | 0 (0 to 0) | 0 (0 to 0) | NA                        |
| 38 | Haiti         | Exposure to forces of nature                    | 0 (0 to 0) | 0 (0 to 0) | NA                        |
| 39 | Haiti         | Falls                                           | 1 (1 to 1) | 1 (1 to 1) | 34.1% (29% to 39.2%)      |
| 40 | Haiti         | Fire, heat, and hot substances                  | 0 (0 to 0) | 0 (0 to 0) | -23.1% (-27.5% to -19.1%) |
| 41 | Haiti         | Foreign body in eyes                            | 0 (0 to 0) | 0 (0 to 0) | 0% (0% to 0%)             |
| 42 | Haiti         | Foreign body in other body part                 | 0 (0 to 0) | 0 (0 to 0) | 1.9% (-1.9% to 7.1%)      |
| 43 | Haiti         | Motor vehicle road injuries                     | 0 (0 to 1) | 0 (0 to 1) | -2.1% (-8.9% to 5.4%)     |
| 44 | Haiti         | Motorcyclist road injuries                      | 0 (0 to 0) | 0 (0 to 0) | 16.8% (9.1% to 27.3%)     |
| 45 |               |                                                 |            |            |                           |
| 46 |               |                                                 |            |            |                           |

|    |          |                                                 |            |            |                           |
|----|----------|-------------------------------------------------|------------|------------|---------------------------|
| 1  |          |                                                 |            |            |                           |
| 2  | Haiti    | Non-venomous animal contact                     | 0 (0 to 0) | 0 (0 to 0) | 6.1% (2% to 11.2%)        |
| 3  | Haiti    | Other exposure to mechanical forces             | 0 (0 to 1) | 0 (0 to 1) | 16.3% (8.4% to 28.6%)     |
| 4  | Haiti    | Other road injuries                             | 0 (0 to 0) | 0 (0 to 0) | 5.3% (-3.5% to 15.2%)     |
| 5  | Haiti    | Other transport injuries                        | 0 (0 to 0) | 0 (0 to 0) | -0.1% (-4.2% to 4.3%)     |
| 6  | Haiti    | Other unintentional injuries                    | 0 (0 to 0) | 0 (0 to 0) | -19.8% (-23.6% to -15.6%) |
| 7  | Haiti    | Pedestrian road injuries                        | 0 (0 to 0) | 0 (0 to 0) | -21.7% (-27.2% to -15.7%) |
| 8  | Haiti    | Physical violence by firearm                    | 0 (0 to 0) | 0 (0 to 0) | 18.8% (8.1% to 32.4%)     |
| 9  | Haiti    | Physical violence by other means                | 0 (0 to 0) | 0 (0 to 0) | -8.3% (-14.5% to -2%)     |
| 10 | Haiti    | Physical violence by sharp object               | 0 (0 to 0) | 0 (0 to 0) | 5.7% (-1.3% to 15%)       |
| 11 | Haiti    | Poisoning by carbon monoxide                    | 0 (0 to 0) | 0 (0 to 0) | 17.1% (2% to 32.5%)       |
| 12 | Haiti    | Poisoning by other means                        | 0 (0 to 0) | 0 (0 to 0) | -21.7% (-28.5% to -15.1%) |
| 13 | Haiti    | Pulmonary aspiration and foreign body in airway | 0 (0 to 0) | 0 (0 to 0) | -34.4% (-41.4% to -26.7%) |
| 14 | Haiti    | Self-harm by firearm                            | 0 (0 to 0) | 0 (0 to 0) | 0.6% (-10.8% to 11.7%)    |
| 15 | Haiti    | Self-harm by other specified means              | 0 (0 to 0) | 0 (0 to 0) | -6.2% (-12.4% to 0.4%)    |
| 16 | Haiti    | Unintentional firearm injuries                  | 0 (0 to 1) | 0 (0 to 1) | -17.2% (-24.8% to -10.9%) |
| 17 | Honduras | Venomous animal contact                         | 0 (0 to 0) | 0 (0 to 0) | 6.4% (1.5% to 11.8%)      |
| 18 | Honduras | Adverse effects of medical treatment            | 0 (0 to 0) | 0 (0 to 0) | 0% (0% to 0%)             |
| 19 | Honduras | Conflict and terrorism                          | 0 (0 to 0) | 0 (0 to 0) | NA                        |
| 20 | Honduras | Cyclist road injuries                           | 0 (0 to 0) | 0 (0 to 0) | -13.7% (-22.4% to -4.8%)  |
| 21 | Honduras | Drowning                                        | 0 (0 to 0) | 0 (0 to 0) | 18.4% (4.5% to 36.8%)     |
| 22 | Honduras | Environmental heat and cold exposure            | 0 (0 to 0) | 0 (0 to 0) | 0.6% (-3.8% to 5.2%)      |
| 23 | Honduras | Executions and police conflict                  | 0 (0 to 0) | 0 (0 to 0) | NA                        |
| 24 | Honduras | Exposure to forces of nature                    | 0 (0 to 0) | 0 (0 to 0) | NA                        |
| 25 | Honduras | Falls                                           | 1 (1 to 2) | 2 (1 to 2) | 13.3% (8.3% to 18.3%)     |
| 26 | Honduras | Fire, heat, and hot substances                  | 0 (0 to 0) | 0 (0 to 0) | 2.9% (-4.6% to 10.4%)     |
| 27 | Honduras | Foreign body in eyes                            | 0 (0 to 0) | 0 (0 to 0) | 0% (0% to 0%)             |
| 28 | Honduras | Foreign body in other body part                 | 0 (0 to 0) | 0 (0 to 0) | 0.8% (-2.8% to 4.8%)      |
| 29 | Honduras | Motor vehicle road injuries                     | 0 (0 to 1) | 0 (0 to 1) | 3.1% (-5.8% to 12.2%)     |
| 30 | Honduras | Motorcyclist road injuries                      | 0 (0 to 0) | 0 (0 to 0) | 10.8% (-1% to 23.1%)      |
| 31 | Honduras | Non-venomous animal contact                     | 0 (0 to 0) | 0 (0 to 0) | -8.1% (-12.7% to -3.9%)   |
| 32 | Honduras | Other exposure to mechanical forces             | 0 (0 to 1) | 0 (0 to 1) | -1.1% (-9.3% to 9.3%)     |
| 33 | Honduras | Other road injuries                             | 0 (0 to 0) | 0 (0 to 0) | -17.4% (-25.5% to -8.4%)  |
| 34 | Honduras | Other transport injuries                        | 0 (0 to 0) | 0 (0 to 0) | -0.6% (-5% to 4.1%)       |
| 35 | Honduras | Other unintentional injuries                    | 0 (0 to 0) | 0 (0 to 0) | -25.8% (-31.2% to -20.1%) |
| 36 | Honduras | Pedestrian road injuries                        | 0 (0 to 0) | 0 (0 to 0) | -28% (-36.2% to -20.3%)   |
| 37 | Honduras | Physical violence by firearm                    | 0 (0 to 0) | 0 (0 to 1) | 134.3% (104.3% to 175.8%) |
| 38 | Honduras | Physical violence by other means                | 0 (0 to 1) | 0 (0 to 1) | 34.2% (20.5% to 47.8%)    |
| 39 | Honduras | Physical violence by sharp object               | 0 (0 to 1) | 1 (0 to 1) | 48.4% (31.5% to 66.4%)    |
| 40 | Honduras | Poisoning by carbon monoxide                    | 0 (0 to 0) | 0 (0 to 0) | 48.5% (28.5% to 69.2%)    |
| 41 | Honduras | Poisoning by other means                        | 0 (0 to 0) | 0 (0 to 0) | -14.5% (-23.6% to -4.4%)  |
| 42 | Honduras | Pulmonary aspiration and foreign body in airway | 0 (0 to 0) | 0 (0 to 0) | -8.9% (-20% to 3.5%)      |
| 43 | Honduras | Self-harm by firearm                            | 0 (0 to 0) | 0 (0 to 0) | -11.1% (-23.9% to 2.4%)   |
| 44 | Honduras | Self-harm by other specified means              | 0 (0 to 0) | 0 (0 to 0) | -11.7% (-20.6% to -2.4%)  |
| 45 |          |                                                 |            |            |                           |
| 46 |          |                                                 |            |            |                           |

|    |          |                                                 |              |             |                           |
|----|----------|-------------------------------------------------|--------------|-------------|---------------------------|
| 1  |          |                                                 |              |             |                           |
| 2  | Honduras | Unintentional firearm injuries                  | 0 (0 to 0)   | 0 (0 to 0)  | -28.4% (-36.4% to -21.7%) |
| 3  | Honduras | Venomous animal contact                         | 0 (0 to 0)   | 0 (0 to 0)  | -12.1% (-16.9% to -7.8%)  |
| 4  | Hungary  | Adverse effects of medical treatment            | 0 (0 to 0)   | 0 (0 to 0)  | 0% (0% to 0%)             |
| 5  | Hungary  | Conflict and terrorism                          | 0 (0 to 0)   | 0 (0 to 0)  | NA                        |
| 6  | Hungary  | Cyclist road injuries                           | 1 (0 to 2)   | 1 (0 to 1)  | -37.5% (-45% to -29.5%)   |
| 7  | Hungary  | Drowning                                        | 0 (0 to 0)   | 0 (0 to 0)  | 73.7% (49.8% to 97.7%)    |
| 8  | Hungary  | Environmental heat and cold exposure            | 0 (0 to 0)   | 0 (0 to 0)  | -16% (-20.4% to -11.4%)   |
| 9  | Hungary  | Executions and police conflict                  | 0 (0 to 0)   | 0 (0 to 0)  | NA                        |
| 10 | Hungary  | Exposure to forces of nature                    | 0 (0 to 0)   | 0 (0 to 0)  | NA                        |
| 11 | Hungary  | Falls                                           | 11 (8 to 15) | 8 (6 to 10) | -30.6% (-35.2% to -24.7%) |
| 12 | Hungary  | Fire, heat, and hot substances                  | 0 (0 to 0)   | 0 (0 to 0)  | -23.8% (-29.9% to -17.4%) |
| 13 | Hungary  | Foreign body in eyes                            | 0 (0 to 0)   | 0 (0 to 0)  | 0% (0% to 0%)             |
| 14 | Hungary  | Foreign body in other body part                 | 0 (0 to 0)   | 0 (0 to 0)  | -0.2% (-3.7% to 3.7%)     |
| 15 | Hungary  | Motor vehicle road injuries                     | 2 (1 to 3)   | 1 (1 to 2)  | -35.9% (-43% to -27.5%)   |
| 16 | Hungary  | Motorcyclist road injuries                      | 0 (0 to 0)   | 0 (0 to 0)  | -30% (-43.3% to -14.4%)   |
| 17 | Hungary  | Non-venomous animal contact                     | 0 (0 to 0)   | 0 (0 to 0)  | -15.2% (-18.2% to -11.7%) |
| 18 | Hungary  | Other exposure to mechanical forces             | 2 (1 to 3)   | 1 (1 to 3)  | -4.9% (-11.4% to 0.3%)    |
| 19 | Hungary  | Other road injuries                             | 0 (0 to 0)   | 0 (0 to 0)  | -10.1% (-20.8% to 1%)     |
| 20 | Hungary  | Other transport injuries                        | 0 (0 to 0)   | 0 (0 to 0)  | -19.4% (-26% to -13.5%)   |
| 21 | Hungary  | Other unintentional injuries                    | 0 (0 to 1)   | 0 (0 to 0)  | -10.3% (-16.9% to -3.8%)  |
| 22 | Hungary  | Pedestrian road injuries                        | 0 (0 to 1)   | 0 (0 to 0)  | -37.9% (-47.4% to -27.5%) |
| 23 | Hungary  | Physical violence by firearm                    | 0 (0 to 0)   | 0 (0 to 0)  | 68.2% (48.8% to 92.4%)    |
| 24 | Hungary  | Physical violence by other means                | 0 (0 to 1)   | 0 (0 to 1)  | -22.6% (-31.8% to -13.7%) |
| 25 | Hungary  | Physical violence by sharp object               | 0 (0 to 0)   | 0 (0 to 0)  | -43.6% (-53.2% to -33.5%) |
| 26 | Hungary  | Poisoning by carbon monoxide                    | 0 (0 to 0)   | 0 (0 to 0)  | 33.3% (22% to 46.7%)      |
| 27 | Hungary  | Poisoning by other means                        | 0 (0 to 0)   | 0 (0 to 0)  | -3.1% (-10.4% to 4.4%)    |
| 28 | Hungary  | Pulmonary aspiration and foreign body in airway | 0 (0 to 0)   | 0 (0 to 0)  | -18.4% (-24.3% to -11.8%) |
| 29 | Hungary  | Self-harm by firearm                            | 0 (0 to 0)   | 0 (0 to 0)  | -10.6% (-23.9% to 10.5%)  |
| 30 | Hungary  | Self-harm by other specified means              | 1 (0 to 1)   | 0 (0 to 1)  | -44.3% (-47.6% to -40.8%) |
| 31 | Hungary  | Unintentional firearm injuries                  | 0 (0 to 0)   | 0 (0 to 0)  | 0.2% (-9% to 9.9%)        |
| 32 | Hungary  | Venomous animal contact                         | 0 (0 to 0)   | 0 (0 to 0)  | -14.4% (-18.9% to -8.9%)  |
| 33 | Iceland  | Adverse effects of medical treatment            | 0 (0 to 0)   | 0 (0 to 0)  | 0% (0% to 0%)             |
| 34 | Iceland  | Conflict and terrorism                          | 0 (0 to 0)   | 0 (0 to 0)  | NA                        |
| 35 | Iceland  | Cyclist road injuries                           | 0 (0 to 0)   | 0 (0 to 0)  | -23.6% (-32.7% to -13.1%) |
| 36 | Iceland  | Drowning                                        | 0 (0 to 0)   | 0 (0 to 0)  | 24.9% (14.5% to 36.1%)    |
| 37 | Iceland  | Environmental heat and cold exposure            | 0 (0 to 0)   | 0 (0 to 0)  | -6.7% (-11.4% to -2.3%)   |
| 38 | Iceland  | Executions and police conflict                  | 0 (0 to 0)   | 0 (0 to 0)  | NA                        |
| 39 | Iceland  | Exposure to forces of nature                    | 0 (0 to 0)   | 0 (0 to 0)  | NA                        |
| 40 | Iceland  | Falls                                           | 5 (4 to 7)   | 6 (4 to 8)  | 10.8% (7% to 15.2%)       |
| 41 | Iceland  | Fire, heat, and hot substances                  | 0 (0 to 0)   | 0 (0 to 0)  | -11.7% (-16.2% to -7.1%)  |
| 42 | Iceland  | Foreign body in eyes                            | 0 (0 to 0)   | 0 (0 to 0)  | 0% (0% to 0%)             |
| 43 | Iceland  | Foreign body in other body part                 | 0 (0 to 0)   | 0 (0 to 0)  | 2.5% (-1% to 6.2%)        |
| 44 | Iceland  | Motor vehicle road injuries                     | 1 (0 to 1)   | 0 (0 to 1)  | -53.1% (-59.1% to -47.3%) |
| 45 |          |                                                 |              |             |                           |
| 46 |          |                                                 |              |             |                           |

|    |         |                                                 |            |            |                           |
|----|---------|-------------------------------------------------|------------|------------|---------------------------|
| 1  |         |                                                 |            |            |                           |
| 2  | Iceland | Motorcyclist road injuries                      | 0 (0 to 0) | 0 (0 to 0) | -6.3% (-20.7% to 8.3%)    |
| 3  | Iceland | Non-venomous animal contact                     | 0 (0 to 0) | 0 (0 to 0) | -9.7% (-13% to -6.1%)     |
| 4  | Iceland | Other exposure to mechanical forces             | 1 (0 to 1) | 0 (0 to 1) | -13.8% (-20.9% to -8%)    |
| 5  | Iceland | Other road injuries                             | 0 (0 to 0) | 0 (0 to 0) | -16.4% (-26.5% to -3.5%)  |
| 6  | Iceland | Other transport injuries                        | 0 (0 to 1) | 0 (0 to 0) | -21.4% (-26.7% to -15.7%) |
| 7  | Iceland | Other unintentional injuries                    | 0 (0 to 0) | 0 (0 to 0) | -10.7% (-15.7% to -6%)    |
| 8  | Iceland | Pedestrian road injuries                        | 0 (0 to 0) | 0 (0 to 0) | -31.5% (-42.4% to -19.1%) |
| 9  | Iceland | Physical violence by firearm                    | 0 (0 to 0) | 0 (0 to 0) | 22% (11.3% to 36.5%)      |
| 10 | Iceland | Physical violence by other means                | 0 (0 to 0) | 0 (0 to 0) | -13.3% (-20.2% to -6.8%)  |
| 11 | Iceland | Physical violence by sharp object               | 0 (0 to 0) | 0 (0 to 0) | -13.1% (-21.8% to -4.4%)  |
| 12 | Iceland | Poisoning by carbon monoxide                    | 0 (0 to 0) | 0 (0 to 0) | 0.7% (-5.8% to 8.1%)      |
| 13 | Iceland | Poisoning by other means                        | 0 (0 to 0) | 0 (0 to 0) | -10% (-15.1% to -5%)      |
| 14 | Iceland | Pulmonary aspiration and foreign body in airway | 0 (0 to 0) | 0 (0 to 0) | -10.2% (-18.1% to -1%)    |
| 15 | Iceland | Self-harm by firearm                            | 0 (0 to 0) | 0 (0 to 0) | -31.7% (-41.3% to -21.2%) |
| 16 | Iceland | Self-harm by other specified means              | 0 (0 to 1) | 0 (0 to 0) | -31.2% (-34.9% to -27%)   |
| 17 | Iceland | Unintentional firearm injuries                  | 0 (0 to 0) | 0 (0 to 0) | 5% (-3.1% to 14.8%)       |
| 18 | Iceland | Venomous animal contact                         | 0 (0 to 0) | 0 (0 to 0) | -9.8% (-15% to -3.8%)     |
| 19 | India   | Adverse effects of medical treatment            | 0 (0 to 0) | 0 (0 to 0) | 0% (0% to 0%)             |
| 20 | India   | Conflict and terrorism                          | 1 (0 to 2) | 0 (0 to 0) | NA                        |
| 21 | India   | Cyclist road injuries                           | 1 (0 to 1) | 1 (0 to 2) | 13.7% (9% to 18.1%)       |
| 22 | India   | Drowning                                        | 0 (0 to 0) | 0 (0 to 0) | -29.2% (-33.2% to -25%)   |
| 23 | India   | Environmental heat and cold exposure            | 0 (0 to 0) | 0 (0 to 0) | -7.2% (-10.6% to -4.1%)   |
| 24 | India   | Executions and police conflict                  | 0 (0 to 0) | 0 (0 to 0) | NA                        |
| 25 | India   | Exposure to forces of nature                    | 0 (0 to 0) | 0 (0 to 0) | NA                        |
| 26 | India   | Falls                                           | 4 (3 to 6) | 5 (3 to 6) | 15.2% (11.9% to 18.2%)    |
| 27 | India   | Fire, heat, and hot substances                  | 0 (0 to 0) | 0 (0 to 0) | -8.5% (-11.4% to -5.9%)   |
| 28 | India   | Foreign body in eyes                            | 0 (0 to 0) | 0 (0 to 0) | 0% (0% to 0%)             |
| 29 | India   | Foreign body in other body part                 | 0 (0 to 0) | 0 (0 to 0) | -3.3% (-4.4% to -2.1%)    |
| 30 | India   | Motor vehicle road injuries                     | 1 (0 to 1) | 1 (0 to 2) | 25.8% (20.9% to 30.4%)    |
| 31 | India   | Motorcyclist road injuries                      | 1 (0 to 1) | 1 (1 to 2) | 56.8% (50.7% to 63.6%)    |
| 32 | India   | Non-venomous animal contact                     | 0 (0 to 1) | 0 (0 to 1) | -31.7% (-34.1% to -27.8%) |
| 33 | India   | Other exposure to mechanical forces             | 0 (0 to 0) | 0 (0 to 0) | -4.4% (-8.1% to -0.3%)    |
| 34 | India   | Other road injuries                             | 0 (0 to 0) | 0 (0 to 0) | 10.9% (6.8% to 15.2%)     |
| 35 | India   | Other transport injuries                        | 0 (0 to 0) | 0 (0 to 0) | 1.9% (0.1% to 3.8%)       |
| 36 | India   | Other unintentional injuries                    | 0 (0 to 0) | 0 (0 to 0) | -19.5% (-21.8% to -17.2%) |
| 37 | India   | Pedestrian road injuries                        | 1 (0 to 1) | 1 (0 to 1) | 13% (7.8% to 18.1%)       |
| 38 | India   | Physical violence by firearm                    | 0 (0 to 0) | 0 (0 to 0) | -6.8% (-13.4% to 1.1%)    |
| 39 | India   | Physical violence by other means                | 0 (0 to 1) | 0 (0 to 1) | -11.3% (-13.1% to -9.6%)  |
| 40 | India   | Physical violence by sharp object               | 0 (0 to 0) | 0 (0 to 0) | -15.5% (-19.4% to -11.5%) |
| 41 | India   | Poisoning by carbon monoxide                    | 0 (0 to 0) | 0 (0 to 0) | 8.1% (-1.4% to 16.7%)     |
| 42 | India   | Poisoning by other means                        | 0 (0 to 0) | 0 (0 to 0) | 1.8% (-6.4% to 9%)        |
| 43 | India   | Pulmonary aspiration and foreign body in airway | 0 (0 to 0) | 0 (0 to 0) | -18.6% (-21.9% to -15.2%) |
| 44 | India   | Self-harm by firearm                            | 0 (0 to 0) | 0 (0 to 0) | -1.3% (-9.5% to 7.8%)     |

|    |                            |                                                 |               |            |                           |
|----|----------------------------|-------------------------------------------------|---------------|------------|---------------------------|
| 1  |                            |                                                 |               |            |                           |
| 2  | India                      | Self-harm by other specified means              | 0 (0 to 1)    | 0 (0 to 1) | -29.2% (-33.9% to -24.8%) |
| 3  | India                      | Unintentional firearm injuries                  | 0 (0 to 0)    | 0 (0 to 0) | -4.3% (-9% to -0.1%)      |
| 4  | India                      | Venomous animal contact                         | 0 (0 to 0)    | 0 (0 to 0) | -51.2% (-54.7% to -47.8%) |
| 5  | Indonesia                  | Adverse effects of medical treatment            | 0 (0 to 0)    | 0 (0 to 0) | 0% (0% to 0%)             |
| 6  | Indonesia                  | Conflict and terrorism                          | 0 (0 to 0)    | 0 (0 to 0) | NA                        |
| 7  | Indonesia                  | Cyclist road injuries                           | 1 (0 to 1)    | 0 (0 to 1) | -8.1% (-13.7% to -1.7%)   |
| 8  | Indonesia                  | Drowning                                        | 0 (0 to 0)    | 0 (0 to 0) | -3% (-11.7% to 5.8%)      |
| 9  | Indonesia                  | Environmental heat and cold exposure            | 0 (0 to 0)    | 0 (0 to 0) | -10% (-14.6% to -5.4%)    |
| 10 | Indonesia                  | Executions and police conflict                  | 0 (0 to 0)    | 0 (0 to 0) | NA                        |
| 11 | Indonesia                  | Exposure to forces of nature                    | 0 (0 to 0)    | 0 (0 to 0) | NA                        |
| 12 | Indonesia                  | Falls                                           | 6 (4 to 8)    | 5 (3 to 8) | -6.6% (-9.1% to -4.3%)    |
| 13 | Indonesia                  | Fire, heat, and hot substances                  | 0 (0 to 0)    | 0 (0 to 0) | 2.8% (-1.2% to 6.6%)      |
| 14 | Indonesia                  | Foreign body in eyes                            | 0 (0 to 0)    | 0 (0 to 0) | 0% (0% to 0%)             |
| 15 | Indonesia                  | Foreign body in other body part                 | 0 (0 to 1)    | 0 (0 to 1) | -9.6% (-11.1% to -8.1%)   |
| 16 | Indonesia                  | Motor vehicle road injuries                     | 1 (0 to 2)    | 1 (0 to 1) | -30.6% (-35.1% to -26.3%) |
| 17 | Indonesia                  | Motorcyclist road injuries                      | 2 (1 to 3)    | 2 (1 to 3) | 3.4% (-2% to 10.6%)       |
| 18 | Indonesia                  | Non-venomous animal contact                     | 0 (0 to 0)    | 0 (0 to 0) | -32.9% (-37.3% to -29.5%) |
| 19 | Indonesia                  | Other exposure to mechanical forces             | 0 (0 to 1)    | 0 (0 to 0) | -14% (-19.9% to -8.5%)    |
| 20 | Indonesia                  | Other road injuries                             | 0 (0 to 0)    | 0 (0 to 0) | -18% (-27.5% to -8.7%)    |
| 21 | Indonesia                  | Other transport injuries                        | 0 (0 to 1)    | 0 (0 to 0) | -37.4% (-41.6% to -33.4%) |
| 22 | Indonesia                  | Other unintentional injuries                    | 1 (0 to 1)    | 1 (0 to 1) | -10.3% (-17.8% to -3.8%)  |
| 23 | Indonesia                  | Pedestrian road injuries                        | 1 (0 to 2)    | 1 (0 to 1) | -41.6% (-45.6% to -37.7%) |
| 24 | Indonesia                  | Physical violence by firearm                    | 0 (0 to 0)    | 0 (0 to 0) | 39.6% (28.1% to 51.2%)    |
| 25 | Indonesia                  | Physical violence by other means                | 0 (0 to 0)    | 0 (0 to 0) | 3.6% (-1.9% to 9.6%)      |
| 26 | Indonesia                  | Physical violence by sharp object               | 0 (0 to 0)    | 0 (0 to 0) | -5.7% (-12% to 0.4%)      |
| 27 | Indonesia                  | Poisoning by carbon monoxide                    | 0 (0 to 0)    | 0 (0 to 0) | 4.2% (0% to 8.9%)         |
| 28 | Indonesia                  | Poisoning by other means                        | 0 (0 to 0)    | 0 (0 to 0) | -13.5% (-15.7% to -10.8%) |
| 29 | Indonesia                  | Pulmonary aspiration and foreign body in airway | 0 (0 to 0)    | 0 (0 to 0) | -32.3% (-38.1% to -25.9%) |
| 30 | Indonesia                  | Self-harm by firearm                            | 0 (0 to 0)    | 0 (0 to 0) | -22.9% (-31% to -12.6%)   |
| 31 | Indonesia                  | Self-harm by other specified means              | 0 (0 to 0)    | 0 (0 to 0) | -17.7% (-20.8% to -14.1%) |
| 32 | Indonesia                  | Unintentional firearm injuries                  | 0 (0 to 0)    | 0 (0 to 0) | -12.2% (-18.7% to -6%)    |
| 33 | Indonesia                  | Venomous animal contact                         | 0 (0 to 0)    | 0 (0 to 0) | 15.7% (5.1% to 30.1%)     |
| 34 | Iran (Islamic Republic of) | Adverse effects of medical treatment            | 0 (0 to 0)    | 0 (0 to 0) | 0% (0% to 0%)             |
| 35 | Iran (Islamic Republic of) | Conflict and terrorism                          | 1 (0 to 3)    | 0 (0 to 0) | NA                        |
| 36 | Iran (Islamic Republic of) | Cyclist road injuries                           | 0 (0 to 0)    | 0 (0 to 0) | -10.7% (-15.4% to -6.4%)  |
| 37 | Iran (Islamic Republic of) | Drowning                                        | 0 (0 to 0)    | 0 (0 to 0) | -54.7% (-59.5% to -49.6%) |
| 38 | Iran (Islamic Republic of) | Environmental heat and cold exposure            | 0 (0 to 0)    | 0 (0 to 0) | 7.3% (5.7% to 9.1%)       |
| 39 | Iran (Islamic Republic of) | Executions and police conflict                  | 0 (0 to 1)    | 0 (0 to 0) | NA                        |
| 40 | Iran (Islamic Republic of) | Exposure to forces of nature                    | 44 (20 to 89) | 0 (0 to 0) | NA                        |
| 41 | Iran (Islamic Republic of) | Falls                                           | 2 (2 to 3)    | 2 (1 to 3) | -0.1% (-3.6% to 3.4%)     |
| 42 | Iran (Islamic Republic of) | Fire, heat, and hot substances                  | 0 (0 to 0)    | 0 (0 to 0) | -30.3% (-33.9% to -26.7%) |
| 43 | Iran (Islamic Republic of) | Foreign body in eyes                            | 0 (0 to 0)    | 0 (0 to 0) | 0% (0% to 0%)             |
| 44 | Iran (Islamic Republic of) | Foreign body in other body part                 | 0 (0 to 0)    | 0 (0 to 0) | 0.4% (-0.4% to 1.3%)      |
| 45 |                            |                                                 |               |            |                           |
| 46 |                            |                                                 |               |            |                           |



|    |                            |                                                 |             |            |                           |
|----|----------------------------|-------------------------------------------------|-------------|------------|---------------------------|
| 1  |                            |                                                 |             |            |                           |
| 2  | Iran (Islamic Republic of) | Motor vehicle road injuries                     | 1 (0 to 1)  | 1 (0 to 1) | -33.3% (-35.9% to -30.9%) |
| 3  | Iran (Islamic Republic of) | Motorcyclist road injuries                      | 0 (0 to 1)  | 0 (0 to 0) | -36.8% (-40.1% to -33.4%) |
| 4  | Iran (Islamic Republic of) | Non-venomous animal contact                     | 0 (0 to 0)  | 0 (0 to 0) | -8.8% (-11.2% to -6.4%)   |
| 5  | Iran (Islamic Republic of) | Other exposure to mechanical forces             | 0 (0 to 1)  | 0 (0 to 1) | -13.5% (-15.5% to -11.8%) |
| 6  | Iran (Islamic Republic of) | Other road injuries                             | 0 (0 to 0)  | 0 (0 to 0) | 7.3% (2% to 12.5%)        |
| 7  | Iran (Islamic Republic of) | Other transport injuries                        | 0 (0 to 0)  | 0 (0 to 0) | 3.4% (1.6% to 5.1%)       |
| 8  | Iran (Islamic Republic of) | Other unintentional injuries                    | 0 (0 to 0)  | 0 (0 to 0) | -14.6% (-17.5% to -11.6%) |
| 9  | Iran (Islamic Republic of) | Pedestrian road injuries                        | 0 (0 to 1)  | 0 (0 to 0) | -28.2% (-32% to -24.8%)   |
| 10 | Iran (Islamic Republic of) | Physical violence by firearm                    | 0 (0 to 0)  | 0 (0 to 0) | 45.5% (36.1% to 57.1%)    |
| 11 | Iran (Islamic Republic of) | Physical violence by other means                | 0 (0 to 0)  | 0 (0 to 0) | -2% (-7.1% to 1.8%)       |
| 12 | Iran (Islamic Republic of) | Physical violence by sharp object               | 0 (0 to 0)  | 0 (0 to 0) | 17.4% (11% to 23.9%)      |
| 13 | Iran (Islamic Republic of) | Poisoning by carbon monoxide                    | 0 (0 to 0)  | 0 (0 to 0) | -37.4% (-45.7% to -28.7%) |
| 14 | Iran (Islamic Republic of) | Poisoning by other means                        | 0 (0 to 0)  | 0 (0 to 0) | -35.9% (-41.7% to -30.3%) |
| 15 | Iran (Islamic Republic of) | Pulmonary aspiration and foreign body in airway | 0 (0 to 0)  | 0 (0 to 0) | -23% (-28.7% to -17.5%)   |
| 16 | Iran (Islamic Republic of) | Self-harm by firearm                            | 0 (0 to 0)  | 0 (0 to 0) | 7% (2.1% to 13.2%)        |
| 17 | Iran (Islamic Republic of) | Self-harm by other specified means              | 0 (0 to 0)  | 0 (0 to 0) | -24.3% (-28.1% to -19.6%) |
| 18 | Iran (Islamic Republic of) | Unintentional firearm injuries                  | 0 (0 to 0)  | 0 (0 to 0) | -12.6% (-15.1% to -10.1%) |
| 19 | Iraq                       | Venomous animal contact                         | 0 (0 to 0)  | 0 (0 to 0) | -17.8% (-22.6% to -14.6%) |
| 20 | Iraq                       | Adverse effects of medical treatment            | 0 (0 to 0)  | 0 (0 to 0) | 0% (0% to 0%)             |
| 21 | Iraq                       | Conflict and terrorism                          | 5 (1 to 14) | 2 (0 to 6) | NA                        |
| 22 | Iraq                       | Cyclist road injuries                           | 0 (0 to 0)  | 0 (0 to 0) | -5.8% (-13.4% to 2.6%)    |
| 23 | Iraq                       | Drowning                                        | 0 (0 to 0)  | 0 (0 to 0) | 42.8% (23.5% to 62.9%)    |
| 24 | Iraq                       | Environmental heat and cold exposure            | 0 (0 to 0)  | 0 (0 to 0) | 2.2% (-3.4% to 8.1%)      |
| 25 | Iraq                       | Executions and police conflict                  | 0 (0 to 0)  | 0 (0 to 0) | NA                        |
| 26 | Iraq                       | Exposure to forces of nature                    | 0 (0 to 0)  | 0 (0 to 0) | NA                        |
| 27 | Iraq                       | Falls                                           | 2 (1 to 2)  | 2 (1 to 2) | 7.2% (1.9% to 12.3%)      |
| 28 | Iraq                       | Fire, heat, and hot substances                  | 0 (0 to 0)  | 0 (0 to 0) | -25.6% (-30.8% to -20%)   |
| 29 | Iraq                       | Foreign body in eyes                            | 0 (0 to 0)  | 0 (0 to 0) | 0% (0% to 0%)             |
| 30 | Iraq                       | Foreign body in other body part                 | 0 (0 to 0)  | 0 (0 to 0) | 4.1% (0.5% to 7.7%)       |
| 31 | Iraq                       | Motor vehicle road injuries                     | 1 (0 to 1)  | 0 (0 to 1) | -17.1% (-22.8% to -10.7%) |
| 32 | Iraq                       | Motorcyclist road injuries                      | 0 (0 to 0)  | 0 (0 to 0) | -15.6% (-23.7% to -6.2%)  |
| 33 | Iraq                       | Non-venomous animal contact                     | 0 (0 to 0)  | 0 (0 to 0) | -12.1% (-19.3% to -6.1%)  |
| 34 | Iraq                       | Other exposure to mechanical forces             | 1 (0 to 1)  | 1 (0 to 1) | -20.9% (-27.3% to -13.9%) |
| 35 | Iraq                       | Other road injuries                             | 0 (0 to 0)  | 0 (0 to 0) | -3.8% (-13.2% to 6.3%)    |
| 36 | Iraq                       | Other transport injuries                        | 0 (0 to 0)  | 0 (0 to 0) | 4.3% (0.1% to 9%)         |
| 37 | Iraq                       | Other unintentional injuries                    | 0 (0 to 1)  | 0 (0 to 0) | -28.2% (-32.8% to -23%)   |
| 38 | Iraq                       | Pedestrian road injuries                        | 0 (0 to 0)  | 0 (0 to 0) | -33% (-39.1% to -26.5%)   |
| 39 | Iraq                       | Physical violence by firearm                    | 0 (0 to 0)  | 0 (0 to 0) | 170.6% (132.9% to 220.3%) |
| 40 | Iraq                       | Physical violence by other means                | 0 (0 to 1)  | 0 (0 to 1) | 17.9% (3.8% to 31.6%)     |
| 41 | Iraq                       | Physical violence by sharp object               | 0 (0 to 0)  | 0 (0 to 0) | 3.5% (-11.2% to 20.4%)    |
| 42 | Iraq                       | Poisoning by carbon monoxide                    | 0 (0 to 0)  | 0 (0 to 0) | 49.5% (34.4% to 66.8%)    |
| 43 | Iraq                       | Poisoning by other means                        | 0 (0 to 0)  | 0 (0 to 0) | -4.7% (-11.9% to 3.5%)    |
| 44 | Iraq                       | Pulmonary aspiration and foreign body in airway | 0 (0 to 0)  | 0 (0 to 0) | -20.5% (-28.7% to -12.3%) |
| 45 |                            |                                                 |             |            |                           |
| 46 |                            |                                                 |             |            |                           |

|    |         |                                                 |            |            |                           |
|----|---------|-------------------------------------------------|------------|------------|---------------------------|
| 1  |         |                                                 |            |            |                           |
| 2  | Iraq    | Self-harm by firearm                            | 0 (0 to 0) | 0 (0 to 0) | 9.8% (-1.6% to 23.6%)     |
| 3  | Iraq    | Self-harm by other specified means              | 0 (0 to 0) | 0 (0 to 0) | 15.7% (9.4% to 23.4%)     |
| 4  | Iraq    | Unintentional firearm injuries                  | 0 (0 to 1) | 0 (0 to 0) | -7.9% (-16.7% to 2.5%)    |
| 5  | Iraq    | Venomous animal contact                         | 0 (0 to 0) | 0 (0 to 0) | 14.4% (5.6% to 25.6%)     |
| 6  | Ireland | Adverse effects of medical treatment            | 0 (0 to 0) | 0 (0 to 0) | 0% (0% to 0%)             |
| 7  | Ireland | Conflict and terrorism                          | 0 (0 to 0) | 0 (0 to 0) | NA                        |
| 8  | Ireland | Cyclist road injuries                           | 0 (0 to 0) | 0 (0 to 0) | -39.3% (-49.1% to -28.4%) |
| 9  | Ireland | Drowning                                        | 0 (0 to 0) | 0 (0 to 0) | 57.1% (42.7% to 71.7%)    |
| 10 | Ireland | Environmental heat and cold exposure            | 0 (0 to 0) | 0 (0 to 0) | -11% (-16.8% to -5%)      |
| 11 | Ireland | Executions and police conflict                  | 0 (0 to 0) | 0 (0 to 0) | NA                        |
| 12 | Ireland | Exposure to forces of nature                    | 0 (0 to 0) | 0 (0 to 0) | NA                        |
| 13 | Ireland | Falls                                           | 5 (4 to 7) | 6 (4 to 8) | 12.7% (7.7% to 17.4%)     |
| 14 | Ireland | Fire, heat, and hot substances                  | 0 (0 to 0) | 0 (0 to 0) | -26.8% (-33.1% to -20.3%) |
| 15 | Ireland | Foreign body in eyes                            | 0 (0 to 0) | 0 (0 to 0) | 0% (0% to 0%)             |
| 16 | Ireland | Foreign body in other body part                 | 0 (0 to 0) | 0 (0 to 0) | 1.9% (-1.5% to 5.3%)      |
| 17 | Ireland | Motor vehicle road injuries                     | 1 (0 to 1) | 0 (0 to 0) | -49.2% (-57.5% to -40.5%) |
| 18 | Ireland | Motorcyclist road injuries                      | 0 (0 to 0) | 0 (0 to 0) | -37.6% (-51.6% to -21.6%) |
| 19 | Ireland | Non-venomous animal contact                     | 0 (0 to 0) | 0 (0 to 0) | -26.5% (-30.2% to -23.2%) |
| 20 | Ireland | Other exposure to mechanical forces             | 1 (0 to 1) | 0 (0 to 1) | -20.7% (-28.9% to -13.9%) |
| 21 | Ireland | Other road injuries                             | 0 (0 to 0) | 0 (0 to 0) | -11.8% (-25.5% to 4.1%)   |
| 22 | Ireland | Other transport injuries                        | 0 (0 to 0) | 0 (0 to 0) | -4.4% (-10% to 2.1%)      |
| 23 | Ireland | Other unintentional injuries                    | 0 (0 to 0) | 0 (0 to 0) | -8.2% (-14.7% to -2.8%)   |
| 24 | Ireland | Pedestrian road injuries                        | 0 (0 to 0) | 0 (0 to 0) | -44.3% (-55.7% to -31.4%) |
| 25 | Ireland | Physical violence by firearm                    | 0 (0 to 0) | 0 (0 to 0) | 40.1% (27.5% to 56.8%)    |
| 26 | Ireland | Physical violence by other means                | 0 (0 to 0) | 0 (0 to 0) | -3.7% (-12.1% to 4.5%)    |
| 27 | Ireland | Physical violence by sharp object               | 0 (0 to 0) | 0 (0 to 0) | -14.2% (-24% to -5.3%)    |
| 28 | Ireland | Poisoning by carbon monoxide                    | 0 (0 to 0) | 0 (0 to 0) | 18.9% (8.7% to 28.7%)     |
| 29 | Ireland | Poisoning by other means                        | 0 (0 to 0) | 0 (0 to 0) | -4.8% (-10.4% to 1%)      |
| 30 | Ireland | Pulmonary aspiration and foreign body in airway | 0 (0 to 0) | 0 (0 to 0) | -14.1% (-22.3% to -5%)    |
| 31 | Ireland | Self-harm by firearm                            | 0 (0 to 0) | 0 (0 to 0) | -0.8% (-18.4% to 16.2%)   |
| 32 | Ireland | Self-harm by other specified means              | 0 (0 to 1) | 0 (0 to 0) | -9.5% (-14.6% to -3.8%)   |
| 33 | Ireland | Unintentional firearm injuries                  | 0 (0 to 0) | 0 (0 to 0) | -0.1% (-11.9% to 10.1%)   |
| 34 | Ireland | Venomous animal contact                         | 0 (0 to 0) | 0 (0 to 0) | -21.8% (-26.8% to -16.6%) |
| 35 | Israel  | Adverse effects of medical treatment            | 0 (0 to 0) | 0 (0 to 0) | 0% (0% to 0%)             |
| 36 | Israel  | Conflict and terrorism                          | 1 (0 to 3) | 0 (0 to 0) | NA                        |
| 37 | Israel  | Cyclist road injuries                           | 0 (0 to 0) | 0 (0 to 0) | -9.7% (-19.5% to 1%)      |
| 38 | Israel  | Drowning                                        | 0 (0 to 0) | 0 (0 to 0) | 52.6% (36% to 71.1%)      |
| 39 | Israel  | Environmental heat and cold exposure            | 0 (0 to 0) | 0 (0 to 0) | -5.4% (-10.5% to -0.5%)   |
| 40 | Israel  | Executions and police conflict                  | 0 (0 to 0) | 0 (0 to 0) | NA                        |
| 41 | Israel  | Exposure to forces of nature                    | 0 (0 to 0) | 0 (0 to 0) | NA                        |
| 42 | Israel  | Falls                                           | 4 (3 to 5) | 4 (3 to 6) | 18% (13.3% to 22.6%)      |
| 43 | Israel  | Fire, heat, and hot substances                  | 0 (0 to 0) | 0 (0 to 0) | -11% (-16.1% to -6.8%)    |
| 44 | Israel  | Foreign body in eyes                            | 0 (0 to 0) | 0 (0 to 0) | 0% (0% to 0%)             |
| 45 |         |                                                 |            |            |                           |
| 46 |         |                                                 |            |            |                           |

|    |        |                                                 |            |            |                           |
|----|--------|-------------------------------------------------|------------|------------|---------------------------|
| 1  |        |                                                 |            |            |                           |
| 2  | Israel | Foreign body in other body part                 | 0 (0 to 0) | 0 (0 to 0) | -6% (-9.3% to -2.4%)      |
| 3  | Israel | Motor vehicle road injuries                     | 1 (0 to 1) | 0 (0 to 1) | -39.4% (-46.5% to -32.2%) |
| 4  | Israel | Motorcyclist road injuries                      | 0 (0 to 0) | 0 (0 to 0) | 24.9% (7.5% to 46.8%)     |
| 5  | Israel | Non-venomous animal contact                     | 0 (0 to 0) | 0 (0 to 0) | -13% (-16.4% to -9.3%)    |
| 6  | Israel | Other exposure to mechanical forces             | 1 (0 to 1) | 0 (0 to 1) | -12.1% (-19.7% to -4.7%)  |
| 7  | Israel | Other road injuries                             | 0 (0 to 0) | 0 (0 to 0) | -13.6% (-24.2% to -2.2%)  |
| 8  | Israel | Other transport injuries                        | 0 (0 to 0) | 0 (0 to 0) | -1.2% (-4.5% to 1.9%)     |
| 9  | Israel | Other unintentional injuries                    | 0 (0 to 0) | 0 (0 to 0) | -20.1% (-24.9% to -14.8%) |
| 10 | Israel | Pedestrian road injuries                        | 0 (0 to 0) | 0 (0 to 0) | -35.1% (-43.3% to -26.7%) |
| 11 | Israel | Physical violence by firearm                    | 0 (0 to 0) | 0 (0 to 0) | 72.7% (51.1% to 102.2%)   |
| 12 | Israel | Physical violence by other means                | 0 (0 to 0) | 0 (0 to 0) | -18.3% (-28.6% to -9%)    |
| 13 | Israel | Physical violence by sharp object               | 0 (0 to 0) | 0 (0 to 0) | 0.2% (-14.1% to 15.4%)    |
| 14 | Israel | Poisoning by carbon monoxide                    | 0 (0 to 0) | 0 (0 to 0) | 7.9% (-1.9% to 17.6%)     |
| 15 | Israel | Poisoning by other means                        | 0 (0 to 0) | 0 (0 to 0) | -8.4% (-14.9% to -2.2%)   |
| 16 | Israel | Pulmonary aspiration and foreign body in airway | 0 (0 to 0) | 0 (0 to 0) | -25.3% (-31.6% to -18%)   |
| 17 | Israel | Self-harm by firearm                            | 0 (0 to 0) | 0 (0 to 0) | -26.1% (-37.9% to -15.8%) |
| 18 | Israel | Self-harm by other specified means              | 0 (0 to 0) | 0 (0 to 0) | -21.4% (-26.1% to -16.4%) |
| 19 | Israel | Unintentional firearm injuries                  | 0 (0 to 0) | 0 (0 to 0) | -33.5% (-43.7% to -25.2%) |
| 20 | Israel | Venomous animal contact                         | 0 (0 to 0) | 0 (0 to 0) | -15.4% (-20.9% to -9.8%)  |
| 21 | Italy  | Adverse effects of medical treatment            | 0 (0 to 0) | 0 (0 to 0) | 0% (0% to 0%)             |
| 22 | Italy  | Conflict and terrorism                          | 0 (0 to 0) | 0 (0 to 0) | NA                        |
| 23 | Italy  | Cyclist road injuries                           | 0 (0 to 0) | 0 (0 to 0) | -30.3% (-35.6% to -23.7%) |
| 24 | Italy  | Drowning                                        | 0 (0 to 0) | 0 (0 to 0) | 4.1% (0.2% to 7%)         |
| 25 | Italy  | Environmental heat and cold exposure            | 0 (0 to 0) | 0 (0 to 0) | -37.2% (-42.3% to -31.1%) |
| 26 | Italy  | Executions and police conflict                  | 0 (0 to 0) | 0 (0 to 0) | NA                        |
| 27 | Italy  | Exposure to forces of nature                    | 0 (0 to 0) | 0 (0 to 0) | NA                        |
| 28 | Italy  | Falls                                           | 7 (5 to 9) | 5 (4 to 7) | -20% (-24.4% to -15.9%)   |
| 29 | Italy  | Fire, heat, and hot substances                  | 0 (0 to 0) | 0 (0 to 0) | -38.9% (-44.4% to -31.7%) |
| 30 | Italy  | Foreign body in eyes                            | 0 (0 to 0) | 0 (0 to 0) | 0% (0% to 0%)             |
| 31 | Italy  | Foreign body in other body part                 | 0 (0 to 1) | 0 (0 to 0) | -23% (-30.2% to -13.8%)   |
| 32 | Italy  | Motor vehicle road injuries                     | 1 (0 to 1) | 0 (0 to 1) | -28.3% (-32.5% to -23.5%) |
| 33 | Italy  | Motorcyclist road injuries                      | 0 (0 to 0) | 0 (0 to 0) | 0.9% (-7.8% to 11.2%)     |
| 34 | Italy  | Non-venomous animal contact                     | 0 (0 to 0) | 0 (0 to 0) | -68.1% (-72.3% to -61.9%) |
| 35 | Italy  | Other exposure to mechanical forces             | 1 (0 to 1) | 0 (0 to 1) | -34.7% (-38.5% to -30.1%) |
| 36 | Italy  | Other road injuries                             | 0 (0 to 0) | 0 (0 to 0) | 7.5% (-0.7% to 17.4%)     |
| 37 | Italy  | Other transport injuries                        | 0 (0 to 0) | 0 (0 to 0) | 7.9% (5.2% to 11.4%)      |
| 38 | Italy  | Other unintentional injuries                    | 0 (0 to 0) | 0 (0 to 0) | -43.7% (-47.1% to -39.7%) |
| 39 | Italy  | Pedestrian road injuries                        | 0 (0 to 0) | 0 (0 to 0) | -29.3% (-34.4% to -23%)   |
| 40 | Italy  | Physical violence by firearm                    | 0 (0 to 0) | 0 (0 to 0) | -40.6% (-45.7% to -35.3%) |
| 41 | Italy  | Physical violence by other means                | 0 (0 to 0) | 0 (0 to 0) | -46.1% (-50.2% to -40.7%) |
| 42 | Italy  | Physical violence by sharp object               | 0 (0 to 0) | 0 (0 to 0) | -46.5% (-51.9% to -39.8%) |
| 43 | Italy  | Poisoning by carbon monoxide                    | 0 (0 to 0) | 0 (0 to 0) | -26.5% (-39% to -6.7%)    |
| 44 | Italy  | Poisoning by other means                        | 0 (0 to 0) | 0 (0 to 0) | -46.9% (-51.3% to -41.5%) |
| 45 |        |                                                 |            |            |                           |
| 46 |        |                                                 |            |            |                           |

|    |         |                                                 |             |             |                           |
|----|---------|-------------------------------------------------|-------------|-------------|---------------------------|
| 1  |         |                                                 |             |             |                           |
| 2  | Italy   | Pulmonary aspiration and foreign body in airway | 0 (0 to 0)  | 0 (0 to 0)  | -9.7% (-16.1% to -3.5%)   |
| 3  | Italy   | Self-harm by firearm                            | 0 (0 to 0)  | 0 (0 to 0)  | -1.2% (-11.9% to 14.5%)   |
| 4  | Italy   | Self-harm by other specified means              | 0 (0 to 0)  | 0 (0 to 0)  | -39.9% (-44.2% to -35.9%) |
| 5  | Italy   | Unintentional firearm injuries                  | 0 (0 to 0)  | 0 (0 to 0)  | -47% (-51.9% to -40%)     |
| 6  | Italy   | Venomous animal contact                         | 0 (0 to 0)  | 0 (0 to 0)  | -72.2% (-76.9% to -65%)   |
| 7  | Jamaica | Adverse effects of medical treatment            | 0 (0 to 0)  | 0 (0 to 0)  | 0% (0% to 0%)             |
| 8  | Jamaica | Conflict and terrorism                          | 1 (0 to 2)  | 0 (0 to 0)  | NA                        |
| 9  | Jamaica | Cyclist road injuries                           | 0 (0 to 0)  | 0 (0 to 0)  | -6.6% (-15.1% to 1.8%)    |
| 10 | Jamaica | Drowning                                        | 0 (0 to 0)  | 0 (0 to 0)  | 56.1% (35% to 79.6%)      |
| 11 | Jamaica | Environmental heat and cold exposure            | 0 (0 to 0)  | 0 (0 to 1)  | 6.5% (2.6% to 10.5%)      |
| 12 | Jamaica | Executions and police conflict                  | 0 (0 to 0)  | 0 (0 to 0)  | NA                        |
| 13 | Jamaica | Exposure to forces of nature                    | 0 (0 to 0)  | 0 (0 to 0)  | NA                        |
| 14 | Jamaica | Falls                                           | 1 (1 to 1)  | 1 (1 to 2)  | 45.5% (39.9% to 51.9%)    |
| 15 | Jamaica | Fire, heat, and hot substances                  | 0 (0 to 0)  | 0 (0 to 0)  | -1.6% (-6.3% to 4.8%)     |
| 16 | Jamaica | Foreign body in eyes                            | 0 (0 to 0)  | 0 (0 to 0)  | 0% (0% to 0%)             |
| 17 | Jamaica | Foreign body in other body part                 | 0 (0 to 0)  | 0 (0 to 0)  | -33.8% (-40.2% to -27.9%) |
| 18 | Jamaica | Motor vehicle road injuries                     | 0 (0 to 0)  | 0 (0 to 0)  | 20.7% (9.7% to 33.3%)     |
| 19 | Jamaica | Motorcyclist road injuries                      | 0 (0 to 0)  | 0 (0 to 0)  | -2.3% (-12.3% to 8.2%)    |
| 20 | Jamaica | Non-venomous animal contact                     | 0 (0 to 0)  | 0 (0 to 0)  | -21.4% (-25% to -18%)     |
| 21 | Jamaica | Other exposure to mechanical forces             | 0 (0 to 1)  | 0 (0 to 1)  | 10.2% (0.8% to 20.7%)     |
| 22 | Jamaica | Other road injuries                             | 0 (0 to 0)  | 0 (0 to 0)  | -10.7% (-19.3% to -1.3%)  |
| 23 | Jamaica | Other transport injuries                        | 0 (0 to 0)  | 0 (0 to 0)  | -12.9% (-16.7% to -8.4%)  |
| 24 | Jamaica | Other unintentional injuries                    | 0 (0 to 0)  | 0 (0 to 0)  | -9% (-14.2% to -4.3%)     |
| 25 | Jamaica | Pedestrian road injuries                        | 0 (0 to 0)  | 0 (0 to 0)  | 5.2% (-4.1% to 14.2%)     |
| 26 | Jamaica | Physical violence by firearm                    | 0 (0 to 0)  | 0 (0 to 0)  | 24.6% (11% to 41.3%)      |
| 27 | Jamaica | Physical violence by other means                | 0 (0 to 0)  | 0 (0 to 0)  | 2.5% (-6.7% to 12.6%)     |
| 28 | Jamaica | Physical violence by sharp object               | 0 (0 to 0)  | 0 (0 to 0)  | -13.1% (-22.6% to -3.9%)  |
| 29 | Jamaica | Poisoning by carbon monoxide                    | 0 (0 to 0)  | 0 (0 to 0)  | 6.4% (-4.9% to 18%)       |
| 30 | Jamaica | Poisoning by other means                        | 0 (0 to 0)  | 0 (0 to 0)  | -1.9% (-8.3% to 4.8%)     |
| 31 | Jamaica | Pulmonary aspiration and foreign body in airway | 0 (0 to 0)  | 0 (0 to 0)  | 5.4% (-5.8% to 18.7%)     |
| 32 | Jamaica | Self-harm by firearm                            | 0 (0 to 0)  | 0 (0 to 0)  | 24.5% (11.7% to 44.1%)    |
| 33 | Jamaica | Self-harm by other specified means              | 0 (0 to 0)  | 0 (0 to 0)  | 8.1% (0.3% to 16.2%)      |
| 34 | Jamaica | Unintentional firearm injuries                  | 1 (0 to 1)  | 0 (0 to 1)  | -16.4% (-25.9% to -7.5%)  |
| 35 | Jamaica | Venomous animal contact                         | 0 (0 to 0)  | 0 (0 to 0)  | -18.8% (-22.5% to -14.4%) |
| 36 | Japan   | Adverse effects of medical treatment            | 0 (0 to 0)  | 0 (0 to 0)  | 0% (0% to 0%)             |
| 37 | Japan   | Conflict and terrorism                          | 0 (0 to 0)  | 0 (0 to 0)  | NA                        |
| 38 | Japan   | Cyclist road injuries                           | 1 (0 to 1)  | 0 (0 to 1)  | -39.3% (-43.1% to -35.5%) |
| 39 | Japan   | Drowning                                        | 0 (0 to 0)  | 0 (0 to 0)  | 35% (29.8% to 41.2%)      |
| 40 | Japan   | Environmental heat and cold exposure            | 0 (0 to 0)  | 0 (0 to 0)  | 13.4% (9.9% to 17.1%)     |
| 41 | Japan   | Executions and police conflict                  | 0 (0 to 0)  | 0 (0 to 0)  | NA                        |
| 42 | Japan   | Exposure to forces of nature                    | 0 (0 to 0)  | 0 (0 to 0)  | NA                        |
| 43 | Japan   | Falls                                           | 8 (5 to 11) | 8 (5 to 11) | 1.3% (-0.7% to 3.2%)      |
| 44 | Japan   | Fire, heat, and hot substances                  | 0 (0 to 0)  | 0 (0 to 0)  | -10.7% (-14.4% to -7.2%)  |
| 45 |         |                                                 |             |             |                           |
| 46 |         |                                                 |             |             |                           |

|    |        |                                                 |            |            |                           |
|----|--------|-------------------------------------------------|------------|------------|---------------------------|
| 1  |        |                                                 |            |            |                           |
| 2  | Japan  | Foreign body in eyes                            | 0 (0 to 0) | 0 (0 to 0) | 0% (0% to 0%)             |
| 3  | Japan  | Foreign body in other body part                 | 1 (0 to 1) | 1 (0 to 1) | -3% (-4.2% to -2%)        |
| 4  | Japan  | Motor vehicle road injuries                     | 1 (0 to 1) | 0 (0 to 1) | -46.9% (-50.3% to -44.1%) |
| 5  | Japan  | Motorcyclist road injuries                      | 0 (0 to 1) | 0 (0 to 0) | -46.1% (-50.4% to -42%)   |
| 6  | Japan  | Non-venomous animal contact                     | 0 (0 to 1) | 0 (0 to 0) | -14.9% (-16.4% to -13.3%) |
| 7  | Japan  | Other exposure to mechanical forces             | 1 (0 to 2) | 1 (0 to 2) | -12.4% (-16.3% to -9.5%)  |
| 8  | Japan  | Other road injuries                             | 0 (0 to 0) | 0 (0 to 0) | -21.9% (-26.1% to -17.2%) |
| 9  | Japan  | Other transport injuries                        | 0 (0 to 1) | 0 (0 to 1) | -10.4% (-13.3% to -7.6%)  |
| 10 | Japan  | Other unintentional injuries                    | 1 (1 to 2) | 1 (1 to 1) | -9.6% (-12% to -7.4%)     |
| 11 | Japan  | Pedestrian road injuries                        | 0 (0 to 1) | 0 (0 to 0) | -38.1% (-43.6% to -32.5%) |
| 12 | Japan  | Physical violence by firearm                    | 0 (0 to 0) | 0 (0 to 0) | 37.2% (29.5% to 46.8%)    |
| 13 | Japan  | Physical violence by other means                | 0 (0 to 0) | 0 (0 to 0) | 0% (-4.5% to 4.3%)        |
| 14 | Japan  | Physical violence by sharp object               | 0 (0 to 0) | 0 (0 to 0) | -0.5% (-6.9% to 5.1%)     |
| 15 | Japan  | Poisoning by carbon monoxide                    | 0 (0 to 0) | 0 (0 to 0) | 7.3% (3.9% to 10.9%)      |
| 16 | Japan  | Poisoning by other means                        | 0 (0 to 0) | 0 (0 to 0) | -9.2% (-11.7% to -6.9%)   |
| 17 | Japan  | Pulmonary aspiration and foreign body in airway | 0 (0 to 0) | 0 (0 to 0) | -14.1% (-16.3% to -11.8%) |
| 18 | Japan  | Self-harm by firearm                            | 0 (0 to 0) | 0 (0 to 0) | 32.8% (25.4% to 42.8%)    |
| 19 | Japan  | Self-harm by other specified means              | 0 (0 to 1) | 0 (0 to 1) | 7% (2.9% to 11.6%)        |
| 20 | Japan  | Unintentional firearm injuries                  | 0 (0 to 0) | 0 (0 to 0) | -3% (-7.2% to 1.8%)       |
| 21 | Japan  | Venomous animal contact                         | 0 (0 to 0) | 0 (0 to 0) | -14.9% (-17.4% to -12.3%) |
| 22 | Jordan | Adverse effects of medical treatment            | 0 (0 to 0) | 0 (0 to 0) | 0% (0% to 0%)             |
| 23 | Jordan | Conflict and terrorism                          | 0 (0 to 0) | 0 (0 to 0) | NA                        |
| 24 | Jordan | Cyclist road injuries                           | 0 (0 to 0) | 0 (0 to 0) | -3.3% (-11.6% to 7.2%)    |
| 25 | Jordan | Drowning                                        | 0 (0 to 0) | 0 (0 to 0) | 117% (85.9% to 149.3%)    |
| 26 | Jordan | Environmental heat and cold exposure            | 0 (0 to 0) | 0 (0 to 0) | -0.3% (-6% to 4.7%)       |
| 27 | Jordan | Executions and police conflict                  | 0 (0 to 0) | 0 (0 to 0) | NA                        |
| 28 | Jordan | Exposure to forces of nature                    | 0 (0 to 0) | 0 (0 to 0) | NA                        |
| 29 | Jordan | Falls                                           | 1 (1 to 2) | 2 (1 to 2) | 23.5% (17.5% to 30%)      |
| 30 | Jordan | Fire, heat, and hot substances                  | 0 (0 to 0) | 0 (0 to 0) | -35% (-40.9% to -29.2%)   |
| 31 | Jordan | Foreign body in eyes                            | 0 (0 to 0) | 0 (0 to 0) | 0% (0% to 0%)             |
| 32 | Jordan | Foreign body in other body part                 | 0 (0 to 0) | 0 (0 to 0) | 1.9% (-2.7% to 6.2%)      |
| 33 | Jordan | Motor vehicle road injuries                     | 1 (0 to 1) | 0 (0 to 1) | -30.5% (-36.1% to -24.2%) |
| 34 | Jordan | Motorcyclist road injuries                      | 0 (0 to 0) | 0 (0 to 0) | -29.3% (-37.4% to -20.3%) |
| 35 | Jordan | Non-venomous animal contact                     | 0 (0 to 0) | 0 (0 to 0) | 2.8% (-1.3% to 8%)        |
| 36 | Jordan | Other exposure to mechanical forces             | 0 (0 to 0) | 0 (0 to 0) | -7.3% (-17.1% to 1.2%)    |
| 37 | Jordan | Other road injuries                             | 0 (0 to 0) | 0 (0 to 0) | -5.1% (-14.4% to 5.6%)    |
| 38 | Jordan | Other transport injuries                        | 0 (0 to 0) | 0 (0 to 0) | -23.9% (-28.2% to -19.5%) |
| 39 | Jordan | Other unintentional injuries                    | 0 (0 to 0) | 0 (0 to 0) | -17.5% (-24.6% to -10%)   |
| 40 | Jordan | Pedestrian road injuries                        | 0 (0 to 0) | 0 (0 to 0) | -36.8% (-42.5% to -30.4%) |
| 41 | Jordan | Physical violence by firearm                    | 0 (0 to 0) | 0 (0 to 0) | 101.3% (74.8% to 136%)    |
| 42 | Jordan | Physical violence by other means                | 0 (0 to 0) | 0 (0 to 0) | -13.2% (-21.9% to -4.8%)  |
| 43 | Jordan | Physical violence by sharp object               | 0 (0 to 0) | 0 (0 to 0) | -13.2% (-23.7% to -3.6%)  |
| 44 | Jordan | Poisoning by carbon monoxide                    | 0 (0 to 0) | 0 (0 to 0) | 6% (-7.2% to 19.8%)       |
| 45 |        |                                                 |            |            |                           |
| 46 |        |                                                 |            |            |                           |

|    |            |                                                 |            |            |                           |
|----|------------|-------------------------------------------------|------------|------------|---------------------------|
| 1  |            |                                                 |            |            |                           |
| 2  | Jordan     | Poisoning by other means                        | 0 (0 to 0) | 0 (0 to 0) | -26.2% (-35.2% to -17.6%) |
| 3  | Jordan     | Pulmonary aspiration and foreign body in airway | 0 (0 to 0) | 0 (0 to 0) | -17.1% (-24.3% to -9.9%)  |
| 4  | Jordan     | Self-harm by firearm                            | 0 (0 to 0) | 0 (0 to 0) | 18.9% (4.3% to 39.4%)     |
| 5  | Jordan     | Self-harm by other specified means              | 0 (0 to 0) | 0 (0 to 0) | -19.2% (-26.8% to -11.7%) |
| 6  | Jordan     | Unintentional firearm injuries                  | 0 (0 to 0) | 0 (0 to 0) | 7% (-3.9% to 18.5%)       |
| 7  | Jordan     | Venomous animal contact                         | 0 (0 to 0) | 0 (0 to 0) | 1.1% (-4.8% to 7.2%)      |
| 8  | Kazakhstan | Adverse effects of medical treatment            | 0 (0 to 0) | 0 (0 to 0) | 0% (0% to 0%)             |
| 9  | Kazakhstan | Conflict and terrorism                          | 0 (0 to 0) | 0 (0 to 0) | NA                        |
| 10 | Kazakhstan | Cyclist road injuries                           | 0 (0 to 0) | 0 (0 to 0) | -1.6% (-12.1% to 9.7%)    |
| 11 | Kazakhstan | Drowning                                        | 0 (0 to 0) | 0 (0 to 0) | 10.9% (-1.1% to 25.3%)    |
| 12 | Kazakhstan | Environmental heat and cold exposure            | 0 (0 to 0) | 0 (0 to 0) | 78.9% (56.3% to 108.2%)   |
| 13 | Kazakhstan | Executions and police conflict                  | 0 (0 to 0) | 0 (0 to 0) | NA                        |
| 14 | Kazakhstan | Exposure to forces of nature                    | 0 (0 to 0) | 0 (0 to 0) | NA                        |
| 15 | Kazakhstan | Falls                                           | 3 (2 to 4) | 4 (3 to 5) | 11.1% (6.3% to 15.6%)     |
| 16 | Kazakhstan | Fire, heat, and hot substances                  | 0 (0 to 0) | 0 (0 to 0) | -24.1% (-30.7% to -17.3%) |
| 17 | Kazakhstan | Foreign body in eyes                            | 0 (0 to 0) | 0 (0 to 0) | 0% (0% to 0%)             |
| 18 | Kazakhstan | Foreign body in other body part                 | 0 (0 to 0) | 0 (0 to 0) | -0.3% (-4.8% to 3.6%)     |
| 19 | Kazakhstan | Motor vehicle road injuries                     | 1 (1 to 2) | 1 (1 to 2) | -0.2% (-10.9% to 9.5%)    |
| 20 | Kazakhstan | Motorcyclist road injuries                      | 0 (0 to 0) | 0 (0 to 0) | -13% (-26% to 0.7%)       |
| 21 | Kazakhstan | Non-venomous animal contact                     | 0 (0 to 0) | 0 (0 to 0) | -15.2% (-19.6% to -10.9%) |
| 22 | Kazakhstan | Other exposure to mechanical forces             | 1 (0 to 2) | 1 (0 to 1) | -12% (-18.5% to -6%)      |
| 23 | Kazakhstan | Other road injuries                             | 0 (0 to 0) | 0 (0 to 0) | -1.6% (-12.8% to 10.3%)   |
| 24 | Kazakhstan | Other transport injuries                        | 0 (0 to 0) | 0 (0 to 0) | -12.1% (-18% to -5.1%)    |
| 25 | Kazakhstan | Other unintentional injuries                    | 0 (0 to 0) | 0 (0 to 0) | -1.1% (-6.4% to 3%)       |
| 26 | Kazakhstan | Pedestrian road injuries                        | 0 (0 to 1) | 0 (0 to 0) | -26.6% (-36.6% to -16.9%) |
| 27 | Kazakhstan | Physical violence by firearm                    | 0 (0 to 0) | 0 (0 to 0) | 14.4% (-4.8% to 33.7%)    |
| 28 | Kazakhstan | Physical violence by other means                | 0 (0 to 1) | 0 (0 to 0) | -31.3% (-39.1% to -22.4%) |
| 29 | Kazakhstan | Physical violence by sharp object               | 0 (0 to 0) | 0 (0 to 0) | -37.9% (-47.6% to -27.3%) |
| 30 | Kazakhstan | Poisoning by carbon monoxide                    | 0 (0 to 0) | 0 (0 to 0) | 36% (20% to 53.7%)        |
| 31 | Kazakhstan | Poisoning by other means                        | 0 (0 to 0) | 0 (0 to 0) | -31.4% (-39% to -23.6%)   |
| 32 | Kazakhstan | Pulmonary aspiration and foreign body in airway | 0 (0 to 0) | 0 (0 to 0) | -27.8% (-35.3% to -20.9%) |
| 33 | Kazakhstan | Self-harm by firearm                            | 0 (0 to 0) | 0 (0 to 0) | -3.2% (-24.6% to 16.2%)   |
| 34 | Kazakhstan | Self-harm by other specified means              | 0 (0 to 1) | 1 (0 to 1) | 14% (8.6% to 20%)         |
| 35 | Kazakhstan | Unintentional firearm injuries                  | 0 (0 to 0) | 0 (0 to 0) | -22.5% (-33.2% to -11.7%) |
| 36 | Kazakhstan | Venomous animal contact                         | 0 (0 to 0) | 0 (0 to 0) | -14.4% (-19.3% to -8.7%)  |
| 37 | Kenya      | Adverse effects of medical treatment            | 0 (0 to 0) | 0 (0 to 0) | 0% (0% to 0%)             |
| 38 | Kenya      | Conflict and terrorism                          | 0 (0 to 0) | 0 (0 to 0) | NA                        |
| 39 | Kenya      | Cyclist road injuries                           | 0 (0 to 1) | 0 (0 to 1) | 8.2% (5.8% to 10.6%)      |
| 40 | Kenya      | Drowning                                        | 0 (0 to 0) | 0 (0 to 0) | -19.8% (-23% to -16.8%)   |
| 41 | Kenya      | Environmental heat and cold exposure            | 0 (0 to 0) | 0 (0 to 0) | -0.8% (-3.4% to 1.7%)     |
| 42 | Kenya      | Executions and police conflict                  | 0 (0 to 0) | 0 (0 to 0) | NA                        |
| 43 | Kenya      | Exposure to forces of nature                    | 0 (0 to 0) | 0 (0 to 0) | NA                        |
| 44 | Kenya      | Falls                                           | 1 (1 to 2) | 1 (1 to 2) | 6.2% (5% to 7.4%)         |
| 45 |            |                                                 |            |            |                           |
| 46 |            |                                                 |            |            |                           |

|    |          |                                                 |            |            |                           |
|----|----------|-------------------------------------------------|------------|------------|---------------------------|
| 1  |          |                                                 |            |            |                           |
| 2  | Kenya    | Fire, heat, and hot substances                  | 0 (0 to 0) | 0 (0 to 0) | -10.6% (-12.3% to -9%)    |
| 3  | Kenya    | Foreign body in eyes                            | 0 (0 to 0) | 0 (0 to 0) | 0% (0% to 0%)             |
| 4  | Kenya    | Foreign body in other body part                 | 0 (0 to 1) | 0 (0 to 1) | -4.1% (-5.1% to -2.8%)    |
| 5  | Kenya    | Motor vehicle road injuries                     | 1 (0 to 1) | 1 (0 to 1) | 4.8% (2.6% to 7.2%)       |
| 6  | Kenya    | Motorcyclist road injuries                      | 0 (0 to 0) | 0 (0 to 0) | 8.1% (5.7% to 10.4%)      |
| 7  | Kenya    | Non-venomous animal contact                     | 0 (0 to 1) | 0 (0 to 0) | -9.9% (-11.5% to -7.9%)   |
| 8  | Kenya    | Other exposure to mechanical forces             | 0 (0 to 0) | 0 (0 to 0) | -5.2% (-8.1% to -1.6%)    |
| 9  | Kenya    | Other road injuries                             | 0 (0 to 0) | 0 (0 to 0) | -0.3% (-3.1% to 2.6%)     |
| 10 | Kenya    | Other transport injuries                        | 0 (0 to 0) | 0 (0 to 0) | -6% (-7.3% to -4.8%)      |
| 11 | Kenya    | Other unintentional injuries                    | 0 (0 to 0) | 0 (0 to 0) | -13.4% (-17.5% to -9%)    |
| 12 | Kenya    | Pedestrian road injuries                        | 1 (0 to 1) | 1 (0 to 1) | -5.1% (-7.4% to -2.6%)    |
| 13 | Kenya    | Physical violence by firearm                    | 0 (0 to 0) | 0 (0 to 0) | 10.1% (7.7% to 12.8%)     |
| 14 | Kenya    | Physical violence by other means                | 0 (0 to 0) | 0 (0 to 0) | 6.2% (4.4% to 7.8%)       |
| 15 | Kenya    | Physical violence by sharp object               | 0 (0 to 0) | 0 (0 to 0) | 7.5% (5.7% to 9%)         |
| 16 | Kenya    | Poisoning by carbon monoxide                    | 0 (0 to 0) | 0 (0 to 0) | 11.2% (7.4% to 15.7%)     |
| 17 | Kenya    | Poisoning by other means                        | 0 (0 to 0) | 0 (0 to 0) | -10.6% (-13.5% to -7.7%)  |
| 18 | Kenya    | Pulmonary aspiration and foreign body in airway | 0 (0 to 0) | 0 (0 to 0) | -11.4% (-13.5% to -9.6%)  |
| 19 | Kenya    | Self-harm by firearm                            | 0 (0 to 0) | 0 (0 to 0) | 14.4% (8% to 24.2%)       |
| 20 | Kenya    | Self-harm by other specified means              | 0 (0 to 0) | 0 (0 to 0) | -4.9% (-8.3% to -1.3%)    |
| 21 | Kenya    | Unintentional firearm injuries                  | 0 (0 to 0) | 0 (0 to 0) | -15.4% (-19.6% to -11%)   |
| 22 | Kenya    | Venomous animal contact                         | 0 (0 to 0) | 0 (0 to 0) | -20% (-24.1% to -16.2%)   |
| 23 | Kiribati | Adverse effects of medical treatment            | 0 (0 to 0) | 0 (0 to 0) | 0% (0% to 0%)             |
| 24 | Kiribati | Conflict and terrorism                          | 0 (0 to 0) | 0 (0 to 0) | NA                        |
| 25 | Kiribati | Cyclist road injuries                           | 0 (0 to 0) | 0 (0 to 0) | -2% (-12.1% to 8.2%)      |
| 26 | Kiribati | Drowning                                        | 0 (0 to 0) | 0 (0 to 0) | -11.8% (-18.4% to -4.2%)  |
| 27 | Kiribati | Environmental heat and cold exposure            | 0 (0 to 0) | 0 (0 to 0) | 12.6% (5.9% to 19.6%)     |
| 28 | Kiribati | Executions and police conflict                  | 0 (0 to 0) | 0 (0 to 0) | NA                        |
| 29 | Kiribati | Exposure to forces of nature                    | 0 (0 to 0) | 0 (0 to 0) | NA                        |
| 30 | Kiribati | Falls                                           | 1 (1 to 1) | 1 (1 to 1) | 38.9% (33.7% to 44.9%)    |
| 31 | Kiribati | Fire, heat, and hot substances                  | 0 (0 to 0) | 0 (0 to 0) | 4.7% (-0.6% to 12%)       |
| 32 | Kiribati | Foreign body in eyes                            | 0 (0 to 0) | 0 (0 to 0) | 0% (0% to 0%)             |
| 33 | Kiribati | Foreign body in other body part                 | 0 (0 to 0) | 0 (0 to 0) | -1.9% (-5.4% to 1.7%)     |
| 34 | Kiribati | Motor vehicle road injuries                     | 0 (0 to 1) | 0 (0 to 0) | -14.7% (-23.9% to -5.8%)  |
| 35 | Kiribati | Motorcyclist road injuries                      | 0 (0 to 0) | 0 (0 to 1) | 56.9% (38.5% to 80.7%)    |
| 36 | Kiribati | Non-venomous animal contact                     | 0 (0 to 0) | 0 (0 to 0) | -1.9% (-6.3% to 2.2%)     |
| 37 | Kiribati | Other exposure to mechanical forces             | 0 (0 to 0) | 0 (0 to 0) | -17.6% (-26% to -10.8%)   |
| 38 | Kiribati | Other road injuries                             | 0 (0 to 0) | 0 (0 to 0) | -8.3% (-19.7% to 3.9%)    |
| 39 | Kiribati | Other transport injuries                        | 0 (0 to 0) | 0 (0 to 0) | -17.3% (-24% to -11.4%)   |
| 40 | Kiribati | Other unintentional injuries                    | 0 (0 to 0) | 0 (0 to 0) | -7.5% (-12.5% to -2.4%)   |
| 41 | Kiribati | Pedestrian road injuries                        | 0 (0 to 0) | 0 (0 to 0) | -33.2% (-43.2% to -22.8%) |
| 42 | Kiribati | Physical violence by firearm                    | 0 (0 to 0) | 0 (0 to 0) | -9% (-18.6% to 1.8%)      |
| 43 | Kiribati | Physical violence by other means                | 0 (0 to 1) | 0 (0 to 0) | -25.9% (-31.6% to -19.6%) |
| 44 | Kiribati | Physical violence by sharp object               | 0 (0 to 0) | 0 (0 to 0) | -22.5% (-29.9% to -14%)   |
| 45 |          |                                                 |            |            |                           |
| 46 |          |                                                 |            |            |                           |

|    |            |                                                 |              |            |                           |
|----|------------|-------------------------------------------------|--------------|------------|---------------------------|
| 1  |            |                                                 |              |            |                           |
| 2  | Kiribati   | Poisoning by carbon monoxide                    | 0 (0 to 0)   | 0 (0 to 0) | 21% (7.8% to 36.5%)       |
| 3  | Kiribati   | Poisoning by other means                        | 0 (0 to 0)   | 0 (0 to 0) | -1.7% (-24.8% to -9.5%)   |
| 4  | Kiribati   | Pulmonary aspiration and foreign body in airway | 0 (0 to 0)   | 0 (0 to 0) | -1.2% (-11.2% to 9.2%)    |
| 5  | Kiribati   | Self-harm by firearm                            | 0 (0 to 0)   | 0 (0 to 0) | -2.4% (-21.3% to 20.8%)   |
| 6  | Kiribati   | Self-harm by other specified means              | 0 (0 to 1)   | 0 (0 to 1) | -14.7% (-19.9% to -8.7%)  |
| 7  | Kiribati   | Unintentional firearm injuries                  | 0 (0 to 0)   | 0 (0 to 0) | 1% (-5.7% to 8.2%)        |
| 8  | Kiribati   | Venomous animal contact                         | 0 (0 to 0)   | 0 (0 to 0) | 4.2% (-2.6% to 11.5%)     |
| 9  | Kuwait     | Adverse effects of medical treatment            | 0 (0 to 0)   | 0 (0 to 0) | 0% (0% to 0%)             |
| 10 | Kuwait     | Conflict and terrorism                          | 31 (7 to 92) | 0 (0 to 0) | NA                        |
| 11 | Kuwait     | Cyclist road injuries                           | 0 (0 to 0)   | 0 (0 to 0) | -21.2% (-29.6% to -11.6%) |
| 12 | Kuwait     | Drowning                                        | 0 (0 to 0)   | 0 (0 to 0) | 94.8% (68.6% to 132.5%)   |
| 13 | Kuwait     | Environmental heat and cold exposure            | 0 (0 to 0)   | 0 (0 to 0) | 3.3% (-1.9% to 8.6%)      |
| 14 | Kuwait     | Executions and police conflict                  | 0 (0 to 0)   | 0 (0 to 0) | NA                        |
| 15 | Kuwait     | Exposure to forces of nature                    | 0 (0 to 0)   | 0 (0 to 0) | NA                        |
| 16 | Kuwait     | Falls                                           | 2 (1 to 3)   | 2 (2 to 3) | 14.6% (9.9% to 19.7%)     |
| 17 | Kuwait     | Fire, heat, and hot substances                  | 0 (0 to 0)   | 0 (0 to 0) | 2.2% (-3.4% to 7.5%)      |
| 18 | Kuwait     | Foreign body in eyes                            | 0 (0 to 0)   | 0 (0 to 0) | 0% (0% to 0%)             |
| 19 | Kuwait     | Foreign body in other body part                 | 0 (0 to 0)   | 0 (0 to 0) | 0.3% (-3% to 4%)          |
| 20 | Kuwait     | Motor vehicle road injuries                     | 1 (0 to 2)   | 1 (0 to 1) | -28.1% (-35.7% to -20.6%) |
| 21 | Kuwait     | Motorcyclist road injuries                      | 0 (0 to 0)   | 0 (0 to 0) | -14.9% (-26.8% to -2.7%)  |
| 22 | Kuwait     | Non-venomous animal contact                     | 0 (0 to 0)   | 0 (0 to 0) | 2.5% (-1.4% to 6.4%)      |
| 23 | Kuwait     | Other exposure to mechanical forces             | 0 (0 to 0)   | 0 (0 to 0) | 0.2% (-8.3% to 8.1%)      |
| 24 | Kuwait     | Other road injuries                             | 0 (0 to 0)   | 0 (0 to 0) | -13.3% (-24% to -1%)      |
| 25 | Kuwait     | Other transport injuries                        | 0 (0 to 0)   | 0 (0 to 0) | -22.2% (-27.3% to -17.2%) |
| 26 | Kuwait     | Other unintentional injuries                    | 0 (0 to 0)   | 0 (0 to 0) | 6.3% (-0.5% to 12.8%)     |
| 27 | Kuwait     | Pedestrian road injuries                        | 0 (0 to 1)   | 0 (0 to 0) | -38.3% (-45.6% to -31.3%) |
| 28 | Kuwait     | Physical violence by firearm                    | 0 (0 to 0)   | 0 (0 to 0) | 38.1% (20.3% to 60.2%)    |
| 29 | Kuwait     | Physical violence by other means                | 0 (0 to 0)   | 0 (0 to 0) | -22% (-29.6% to -14.1%)   |
| 30 | Kuwait     | Physical violence by sharp object               | 0 (0 to 0)   | 0 (0 to 0) | -32.9% (-41.8% to -25.1%) |
| 31 | Kuwait     | Poisoning by carbon monoxide                    | 0 (0 to 0)   | 0 (0 to 0) | 15.8% (5% to 28%)         |
| 32 | Kuwait     | Poisoning by other means                        | 0 (0 to 0)   | 0 (0 to 0) | -10% (-16.8% to -1.4%)    |
| 33 | Kuwait     | Pulmonary aspiration and foreign body in airway | 0 (0 to 0)   | 0 (0 to 0) | -12.9% (-21.3% to -4.8%)  |
| 34 | Kuwait     | Self-harm by firearm                            | 0 (0 to 0)   | 0 (0 to 0) | 30.1% (18.4% to 44%)      |
| 35 | Kuwait     | Self-harm by other specified means              | 0 (0 to 0)   | 0 (0 to 0) | 11.4% (4.1% to 18.9%)     |
| 36 | Kuwait     | Unintentional firearm injuries                  | 0 (0 to 0)   | 0 (0 to 0) | 8.3% (-1.3% to 19.3%)     |
| 37 | Kuwait     | Venomous animal contact                         | 0 (0 to 0)   | 0 (0 to 0) | 2.8% (-3.9% to 9.1%)      |
| 38 | Kyrgyzstan | Adverse effects of medical treatment            | 0 (0 to 0)   | 0 (0 to 0) | 0% (0% to 0%)             |
| 39 | Kyrgyzstan | Conflict and terrorism                          | 0 (0 to 0)   | 0 (0 to 0) | NA                        |
| 40 | Kyrgyzstan | Cyclist road injuries                           | 0 (0 to 0)   | 0 (0 to 0) | -2.9% (-12.1% to 7%)      |
| 41 | Kyrgyzstan | Drowning                                        | 0 (0 to 0)   | 0 (0 to 0) | -5.9% (-18.1% to 5.6%)    |
| 42 | Kyrgyzstan | Environmental heat and cold exposure            | 0 (0 to 0)   | 0 (0 to 0) | 10% (-1.1% to 21.7%)      |
| 43 | Kyrgyzstan | Executions and police conflict                  | 0 (0 to 0)   | 0 (0 to 0) | NA                        |
| 44 | Kyrgyzstan | Exposure to forces of nature                    | 0 (0 to 0)   | 0 (0 to 0) | NA                        |
| 45 |            |                                                 |              |            |                           |
| 46 |            |                                                 |              |            |                           |



|    |                                  |                                                 |             |            |                           |
|----|----------------------------------|-------------------------------------------------|-------------|------------|---------------------------|
| 1  |                                  |                                                 |             |            |                           |
| 2  | Kyrgyzstan                       | Falls                                           | 3 (3 to 4)  | 2 (2 to 3) | -28.6% (-33.5% to -22.9%) |
| 3  | Kyrgyzstan                       | Fire, heat, and hot substances                  | 0 (0 to 0)  | 0 (0 to 0) | -29.2% (-37.7% to -20.5%) |
| 4  | Kyrgyzstan                       | Foreign body in eyes                            | 0 (0 to 0)  | 0 (0 to 0) | 0% (0% to 0%)             |
| 5  | Kyrgyzstan                       | Foreign body in other body part                 | 0 (0 to 0)  | 0 (0 to 0) | 0.3% (-4% to 4.2%)        |
| 6  | Kyrgyzstan                       | Motor vehicle road injuries                     | 1 (1 to 2)  | 1 (1 to 2) | -6% (-15.1% to 3.5%)      |
| 7  | Kyrgyzstan                       | Motorcyclist road injuries                      | 0 (0 to 0)  | 0 (0 to 0) | -38.5% (-48.4% to -27.9%) |
| 8  | Kyrgyzstan                       | Non-venomous animal contact                     | 0 (0 to 0)  | 0 (0 to 0) | 8.6% (4.2% to 14%)        |
| 9  | Kyrgyzstan                       | Other exposure to mechanical forces             | 1 (0 to 1)  | 1 (0 to 1) | -2.7% (-8% to 2%)         |
| 10 | Kyrgyzstan                       | Other road injuries                             | 0 (0 to 0)  | 0 (0 to 0) | -23.7% (-33.8% to -13.3%) |
| 11 | Kyrgyzstan                       | Other transport injuries                        | 0 (0 to 0)  | 0 (0 to 0) | -3.3% (-7.8% to 1.8%)     |
| 12 | Kyrgyzstan                       | Other unintentional injuries                    | 0 (0 to 0)  | 0 (0 to 0) | -22% (-28.1% to -15.6%)   |
| 13 | Kyrgyzstan                       | Pedestrian road injuries                        | 0 (0 to 1)  | 0 (0 to 0) | -12.9% (-24% to -1.4%)    |
| 14 | Kyrgyzstan                       | Physical violence by firearm                    | 0 (0 to 0)  | 0 (0 to 0) | -11.4% (-28.2% to 6.8%)   |
| 15 | Kyrgyzstan                       | Physical violence by other means                | 0 (0 to 1)  | 0 (0 to 0) | -49.2% (-55.5% to -42.2%) |
| 16 | Kyrgyzstan                       | Physical violence by sharp object               | 0 (0 to 0)  | 0 (0 to 0) | -55.1% (-62% to -47.7%)   |
| 17 | Kyrgyzstan                       | Poisoning by carbon monoxide                    | 0 (0 to 0)  | 0 (0 to 0) | -17.3% (-32.3% to 1.4%)   |
| 18 | Kyrgyzstan                       | Poisoning by other means                        | 0 (0 to 0)  | 0 (0 to 0) | -16.8% (-27.5% to -4.9%)  |
| 19 | Kyrgyzstan                       | Pulmonary aspiration and foreign body in airway | 0 (0 to 0)  | 0 (0 to 0) | -14.9% (-22.8% to -7.2%)  |
| 20 | Kyrgyzstan                       | Self-harm by firearm                            | 0 (0 to 0)  | 0 (0 to 0) | -25% (-39.4% to -9%)      |
| 21 | Kyrgyzstan                       | Self-harm by other specified means              | 0 (0 to 0)  | 0 (0 to 0) | -19.7% (-23.9% to -15.3%) |
| 22 | Kyrgyzstan                       | Unintentional firearm injuries                  | 0 (0 to 0)  | 0 (0 to 0) | -4.6% (-12.6% to 3.4%)    |
| 23 | Kyrgyzstan                       | Venomous animal contact                         | 0 (0 to 0)  | 0 (0 to 0) | 2.6% (-3.7% to 8.8%)      |
| 24 | Lao People's Democratic Republic | Adverse effects of medical treatment            | 0 (0 to 0)  | 0 (0 to 0) | 0% (0% to 0%)             |
| 25 | Lao People's Democratic Republic | Conflict and terrorism                          | 3 (1 to 11) | 0 (0 to 0) | NA                        |
| 26 | Lao People's Democratic Republic | Cyclist road injuries                           | 0 (0 to 0)  | 0 (0 to 0) | -7.3% (-15.6% to 1%)      |
| 27 | Lao People's Democratic Republic | Drowning                                        | 0 (0 to 0)  | 0 (0 to 0) | -43.4% (-47.5% to -37.8%) |
| 28 | Lao People's Democratic Republic | Environmental heat and cold exposure            | 0 (0 to 0)  | 0 (0 to 0) | -7% (-12.6% to -1.8%)     |
| 29 | Lao People's Democratic Republic | Executions and police conflict                  | 0 (0 to 0)  | 0 (0 to 0) | NA                        |
| 30 | Lao People's Democratic Republic | Exposure to forces of nature                    | 0 (0 to 0)  | 0 (0 to 0) | NA                        |
| 31 | Lao People's Democratic Republic | Falls                                           | 1 (1 to 1)  | 1 (1 to 2) | 39.1% (33.8% to 44.8%)    |
| 32 | Lao People's Democratic Republic | Fire, heat, and hot substances                  | 0 (0 to 0)  | 0 (0 to 0) | -33.2% (-39% to -28.4%)   |
| 33 | Lao People's Democratic Republic | Foreign body in eyes                            | 0 (0 to 0)  | 0 (0 to 0) | 0% (0% to 0%)             |
| 34 | Lao People's Democratic Republic | Foreign body in other body part                 | 0 (0 to 0)  | 0 (0 to 0) | -3.5% (-7.2% to 0.5%)     |
| 35 | Lao People's Democratic Republic | Motor vehicle road injuries                     | 0 (0 to 1)  | 0 (0 to 1) | -12% (-19.3% to -4.1%)    |
| 36 | Lao People's Democratic Republic | Motorcyclist road injuries                      | 1 (0 to 1)  | 1 (0 to 1) | 1.8% (-6.7% to 10.8%)     |
| 37 | Lao People's Democratic Republic | Non-venomous animal contact                     | 0 (0 to 0)  | 0 (0 to 0) | -36% (-39.6% to -32.6%)   |
| 38 | Lao People's Democratic Republic | Other exposure to mechanical forces             | 0 (0 to 0)  | 0 (0 to 0) | -13% (-20.2% to -7%)      |
| 39 | Lao People's Democratic Republic | Other road injuries                             | 0 (0 to 0)  | 0 (0 to 0) | -0.9% (-10.6% to 8.6%)    |
| 40 | Lao People's Democratic Republic | Other transport injuries                        | 0 (0 to 0)  | 0 (0 to 0) | -28% (-32.6% to -23.2%)   |
| 41 | Lao People's Democratic Republic | Other unintentional injuries                    | 0 (0 to 0)  | 0 (0 to 0) | -14.2% (-19.2% to -8.9%)  |
| 42 | Lao People's Democratic Republic | Pedestrian road injuries                        | 0 (0 to 0)  | 0 (0 to 0) | -30.5% (-36.3% to -23.9%) |
| 43 | Lao People's Democratic Republic | Physical violence by firearm                    | 0 (0 to 0)  | 0 (0 to 0) | -25.9% (-32.2% to -17.7%) |
| 44 | Lao People's Democratic Republic | Physical violence by other means                | 0 (0 to 1)  | 0 (0 to 1) | -25.5% (-30.8% to -19.2%) |
| 45 |                                  |                                                 |             |            |                           |
| 46 |                                  |                                                 |             |            |                           |

|    |                                  |                                                 |              |            |                           |
|----|----------------------------------|-------------------------------------------------|--------------|------------|---------------------------|
| 1  |                                  |                                                 |              |            |                           |
| 2  | Lao People's Democratic Republic | Physical violence by sharp object               | 0 (0 to 1)   | 0 (0 to 0) | -20.4% (-26.8% to -12.5%) |
| 3  | Lao People's Democratic Republic | Poisoning by carbon monoxide                    | 0 (0 to 0)   | 0 (0 to 0) | 16.6% (-2.1% to 38.6%)    |
| 4  | Lao People's Democratic Republic | Poisoning by other means                        | 0 (0 to 0)   | 0 (0 to 0) | -28.1% (-36.5% to -19.4%) |
| 5  | Lao People's Democratic Republic | Pulmonary aspiration and foreign body in airway | 0 (0 to 0)   | 0 (0 to 0) | -37.7% (-45.6% to -30.5%) |
| 6  | Lao People's Democratic Republic | Self-harm by firearm                            | 0 (0 to 0)   | 0 (0 to 0) | -5% (-22.1% to 13.4%)     |
| 7  | Lao People's Democratic Republic | Self-harm by other specified means              | 0 (0 to 0)   | 0 (0 to 0) | -33.5% (-37.4% to -28.5%) |
| 8  | Lao People's Democratic Republic | Unintentional firearm injuries                  | 0 (0 to 0)   | 0 (0 to 0) | -18% (-26.2% to -10.9%)   |
| 9  | Lao People's Democratic Republic | Venomous animal contact                         | 0 (0 to 0)   | 0 (0 to 0) | -33.8% (-41.7% to -27%)   |
| 10 | Latvia                           | Adverse effects of medical treatment            | 0 (0 to 0)   | 0 (0 to 0) | 0% (0% to 0%)             |
| 11 | Latvia                           | Conflict and terrorism                          | 0 (0 to 0)   | 0 (0 to 0) | NA                        |
| 12 | Latvia                           | Cyclist road injuries                           | 1 (0 to 1)   | 0 (0 to 1) | -41% (-49.1% to -31.8%)   |
| 13 | Latvia                           | Drowning                                        | 0 (0 to 0)   | 0 (0 to 0) | -8.2% (-17.6% to 1.2%)    |
| 14 | Latvia                           | Environmental heat and cold exposure            | 0 (0 to 0)   | 0 (0 to 1) | 27.1% (15.8% to 41.9%)    |
| 15 | Latvia                           | Executions and police conflict                  | 0 (0 to 0)   | 0 (0 to 0) | NA                        |
| 16 | Latvia                           | Exposure to forces of nature                    | 0 (0 to 0)   | 0 (0 to 0) | NA                        |
| 17 | Latvia                           | Falls                                           | 9 (7 to 12)  | 6 (4 to 8) | -34.5% (-37.9% to -31%)   |
| 18 | Latvia                           | Fire, heat, and hot substances                  | 0 (0 to 0)   | 0 (0 to 0) | -38.8% (-43.1% to -33.9%) |
| 19 | Latvia                           | Foreign body in eyes                            | 0 (0 to 0)   | 0 (0 to 0) | 0% (0% to 0%)             |
| 20 | Latvia                           | Foreign body in other body part                 | 0 (0 to 0)   | 0 (0 to 0) | 2.3% (-2.1% to 6.4%)      |
| 21 | Latvia                           | Motor vehicle road injuries                     | 3 (2 to 5)   | 1 (1 to 3) | -50.5% (-57.4% to -41.9%) |
| 22 | Latvia                           | Motorcyclist road injuries                      | 0 (0 to 1)   | 0 (0 to 0) | -49.7% (-59.4% to -38.5%) |
| 23 | Latvia                           | Non-venomous animal contact                     | 0 (0 to 0)   | 0 (0 to 0) | -11% (-15.6% to -6.3%)    |
| 24 | Latvia                           | Other exposure to mechanical forces             | 1 (1 to 2)   | 1 (0 to 2) | -25.2% (-33% to -16.6%)   |
| 25 | Latvia                           | Other road injuries                             | 0 (0 to 0)   | 0 (0 to 0) | -15.5% (-26.8% to -2.5%)  |
| 26 | Latvia                           | Other transport injuries                        | 0 (0 to 0)   | 0 (0 to 0) | -41.2% (-46.3% to -36.4%) |
| 27 | Latvia                           | Other unintentional injuries                    | 0 (0 to 0)   | 0 (0 to 0) | -11.9% (-18.9% to -5.4%)  |
| 28 | Latvia                           | Pedestrian road injuries                        | 1 (0 to 2)   | 0 (0 to 1) | -63.8% (-69.5% to -57.9%) |
| 29 | Latvia                           | Physical violence by firearm                    | 0 (0 to 0)   | 0 (0 to 0) | -18% (-36.5% to 2.9%)     |
| 30 | Latvia                           | Physical violence by other means                | 1 (0 to 1)   | 0 (0 to 1) | -36.7% (-43.4% to -29%)   |
| 31 | Latvia                           | Physical violence by sharp object               | 0 (0 to 0)   | 0 (0 to 0) | -43.9% (-51.9% to -35.7%) |
| 32 | Latvia                           | Poisoning by carbon monoxide                    | 0 (0 to 0)   | 0 (0 to 0) | -0.6% (-17.3% to 17.2%)   |
| 33 | Latvia                           | Poisoning by other means                        | 0 (0 to 0)   | 0 (0 to 0) | 5.7% (-6.3% to 18.1%)     |
| 34 | Latvia                           | Pulmonary aspiration and foreign body in airway | 0 (0 to 0)   | 0 (0 to 0) | -20.8% (-27.3% to -14%)   |
| 35 | Latvia                           | Self-harm by firearm                            | 0 (0 to 0)   | 0 (0 to 0) | -33.4% (-43.7% to -23.3%) |
| 36 | Latvia                           | Self-harm by other specified means              | 1 (0 to 1)   | 0 (0 to 1) | -37.3% (-41.4% to -32.4%) |
| 37 | Latvia                           | Unintentional firearm injuries                  | 0 (0 to 0)   | 0 (0 to 0) | -2.4% (-15.1% to 11.1%)   |
| 38 | Latvia                           | Venomous animal contact                         | 0 (0 to 0)   | 0 (0 to 0) | -8.1% (-14.2% to -1.3%)   |
| 39 | Lebanon                          | Adverse effects of medical treatment            | 0 (0 to 0)   | 0 (0 to 0) | 0% (0% to 0%)             |
| 40 | Lebanon                          | Conflict and terrorism                          | 12 (2 to 35) | 0 (0 to 0) | NA                        |
| 41 | Lebanon                          | Cyclist road injuries                           | 0 (0 to 0)   | 0 (0 to 0) | 2.6% (-4.7% to 12.6%)     |
| 42 | Lebanon                          | Drowning                                        | 0 (0 to 0)   | 0 (0 to 0) | 133.1% (103.2% to 162.3%) |
| 43 | Lebanon                          | Environmental heat and cold exposure            | 0 (0 to 0)   | 0 (0 to 0) | 3.5% (-1.7% to 7.4%)      |
| 44 | Lebanon                          | Executions and police conflict                  | 0 (0 to 0)   | 0 (0 to 0) | NA                        |
| 45 |                                  |                                                 |              |            |                           |
| 46 |                                  |                                                 |              |            |                           |

|    |         |                                                 |            |            |                           |
|----|---------|-------------------------------------------------|------------|------------|---------------------------|
| 1  |         |                                                 |            |            |                           |
| 2  | Lebanon | Exposure to forces of nature                    | 0 (0 to 0) | 0 (0 to 0) | NA                        |
| 3  | Lebanon | Falls                                           | 1 (1 to 2) | 2 (2 to 3) | 54.8% (49.1% to 60.7%)    |
| 4  | Lebanon | Fire, heat, and hot substances                  | 0 (0 to 0) | 0 (0 to 0) | -22.7% (-28.6% to -16.4%) |
| 5  | Lebanon | Foreign body in eyes                            | 0 (0 to 0) | 0 (0 to 0) | 0% (0% to 0%)             |
| 6  | Lebanon | Foreign body in other body part                 | 0 (0 to 0) | 0 (0 to 0) | -0.7% (-4.9% to 3.4%)     |
| 7  | Lebanon | Motor vehicle road injuries                     | 0 (0 to 1) | 0 (0 to 1) | -20.4% (-26.1% to -14.3%) |
| 8  | Lebanon | Motorcyclist road injuries                      | 0 (0 to 0) | 0 (0 to 0) | -5.6% (-14.1% to 4.7%)    |
| 9  | Lebanon | Non-venomous animal contact                     | 0 (0 to 0) | 0 (0 to 0) | -2.8% (-8% to 2%)         |
| 10 | Lebanon | Other exposure to mechanical forces             | 0 (0 to 0) | 0 (0 to 0) | -12.8% (-19.1% to -7.4%)  |
| 11 | Lebanon | Other road injuries                             | 0 (0 to 0) | 0 (0 to 0) | 4.5% (-3.6% to 14.7%)     |
| 12 | Lebanon | Other transport injuries                        | 0 (0 to 0) | 0 (0 to 0) | -0.5% (-4.4% to 3.3%)     |
| 13 | Lebanon | Other unintentional injuries                    | 0 (0 to 0) | 0 (0 to 0) | -6.5% (-11.2% to -1.4%)   |
| 14 | Lebanon | Pedestrian road injuries                        | 0 (0 to 0) | 0 (0 to 0) | -16.8% (-24% to -8.7%)    |
| 15 | Lebanon | Physical violence by firearm                    | 0 (0 to 0) | 0 (0 to 0) | -0.8% (-19.6% to 27.5%)   |
| 16 | Lebanon | Physical violence by other means                | 1 (0 to 2) | 0 (0 to 1) | -65% (-70.6% to -58%)     |
| 17 | Lebanon | Physical violence by sharp object               | 0 (0 to 1) | 0 (0 to 0) | -77.9% (-82.2% to -72.8%) |
| 18 | Lebanon | Poisoning by carbon monoxide                    | 0 (0 to 0) | 0 (0 to 0) | 34.6% (20.5% to 49.3%)    |
| 19 | Lebanon | Poisoning by other means                        | 0 (0 to 0) | 0 (0 to 0) | -19.4% (-27.4% to -12.1%) |
| 20 | Lebanon | Pulmonary aspiration and foreign body in airway | 0 (0 to 0) | 0 (0 to 0) | -13.2% (-20.9% to -5.3%)  |
| 21 | Lebanon | Self-harm by firearm                            | 0 (0 to 0) | 0 (0 to 0) | 34.3% (22.6% to 50.4%)    |
| 22 | Lebanon | Self-harm by other specified means              | 0 (0 to 0) | 0 (0 to 0) | 9% (2.9% to 16.6%)        |
| 23 | Lebanon | Unintentional firearm injuries                  | 0 (0 to 0) | 0 (0 to 0) | -3% (-10% to 4.5%)        |
| 24 | Lebanon | Venomous animal contact                         | 0 (0 to 0) | 0 (0 to 0) | 1.2% (-5.4% to 8.6%)      |
| 25 | Lesotho | Adverse effects of medical treatment            | 0 (0 to 0) | 0 (0 to 0) | 0% (0% to 0%)             |
| 26 | Lesotho | Conflict and terrorism                          | 0 (0 to 0) | 0 (0 to 0) | NA                        |
| 27 | Lesotho | Cyclist road injuries                           | 0 (0 to 1) | 1 (0 to 1) | 52.1% (40.1% to 66.4%)    |
| 28 | Lesotho | Drowning                                        | 0 (0 to 0) | 0 (0 to 0) | -4.6% (-12.2% to 3.1%)    |
| 29 | Lesotho | Environmental heat and cold exposure            | 0 (0 to 0) | 0 (0 to 0) | 2.8% (-2.2% to 7.7%)      |
| 30 | Lesotho | Executions and police conflict                  | 0 (0 to 0) | 0 (0 to 0) | NA                        |
| 31 | Lesotho | Exposure to forces of nature                    | 0 (0 to 1) | 0 (0 to 0) | NA                        |
| 32 | Lesotho | Falls                                           | 2 (2 to 3) | 3 (2 to 4) | 15.6% (11.9% to 20.3%)    |
| 33 | Lesotho | Fire, heat, and hot substances                  | 0 (0 to 0) | 0 (0 to 0) | 18.6% (11.3% to 27.1%)    |
| 34 | Lesotho | Foreign body in eyes                            | 0 (0 to 0) | 0 (0 to 0) | 0% (0% to 0%)             |
| 35 | Lesotho | Foreign body in other body part                 | 1 (0 to 1) | 1 (0 to 1) | -2.7% (-6.7% to 1%)       |
| 36 | Lesotho | Motor vehicle road injuries                     | 1 (0 to 1) | 1 (1 to 2) | 62.5% (49.7% to 77.1%)    |
| 37 | Lesotho | Motorcyclist road injuries                      | 0 (0 to 0) | 0 (0 to 1) | 97.8% (76.5% to 123.2%)   |
| 38 | Lesotho | Non-venomous animal contact                     | 0 (0 to 1) | 0 (0 to 1) | -7.1% (-11.8% to -1.8%)   |
| 39 | Lesotho | Other exposure to mechanical forces             | 0 (0 to 0) | 0 (0 to 0) | -0.2% (-5.5% to 6%)       |
| 40 | Lesotho | Other road injuries                             | 0 (0 to 0) | 0 (0 to 0) | 29.9% (18.8% to 41.3%)    |
| 41 | Lesotho | Other transport injuries                        | 0 (0 to 1) | 0 (0 to 1) | 7.8% (2.4% to 13.8%)      |
| 42 | Lesotho | Other unintentional injuries                    | 0 (0 to 0) | 0 (0 to 0) | -4.9% (-9.9% to 0.5%)     |
| 43 | Lesotho | Pedestrian road injuries                        | 1 (1 to 2) | 2 (1 to 3) | 48.7% (37.9% to 58.8%)    |
| 44 | Lesotho | Physical violence by firearm                    | 0 (0 to 0) | 0 (0 to 0) | 22.4% (9.5% to 35.1%)     |
| 45 |         |                                                 |            |            |                           |
| 46 |         |                                                 |            |            |                           |

|    |         |                                                 |                |             |                           |
|----|---------|-------------------------------------------------|----------------|-------------|---------------------------|
| 1  |         |                                                 |                |             |                           |
| 2  | Lesotho | Physical violence by other means                | 0 (0 to 1)     | 0 (0 to 1)  | 36.5% (26.2% to 47.8%)    |
| 3  | Lesotho | Physical violence by sharp object               | 0 (0 to 0)     | 0 (0 to 0)  | 39.3% (25.1% to 54%)      |
| 4  | Lesotho | Poisoning by carbon monoxide                    | 0 (0 to 0)     | 0 (0 to 0)  | 4.6% (-5.1% to 16%)       |
| 5  | Lesotho | Poisoning by other means                        | 0 (0 to 0)     | 0 (0 to 0)  | -4.2% (-11.6% to 2.9%)    |
| 6  | Lesotho | Pulmonary aspiration and foreign body in airway | 0 (0 to 0)     | 0 (0 to 0)  | -3.6% (-11% to 5.6%)      |
| 7  | Lesotho | Self-harm by firearm                            | 0 (0 to 0)     | 0 (0 to 0)  | 96.2% (66.3% to 137.8%)   |
| 8  | Lesotho | Self-harm by other specified means              | 0 (0 to 0)     | 0 (0 to 0)  | 75.4% (65.9% to 85.7%)    |
| 9  | Lesotho | Unintentional firearm injuries                  | 0 (0 to 0)     | 0 (0 to 0)  | -8.9% (-17.1% to -0.9%)   |
| 10 | Lesotho | Venomous animal contact                         | 0 (0 to 0)     | 0 (0 to 0)  | -15.7% (-21.3% to -9.5%)  |
| 11 | Liberia | Adverse effects of medical treatment            | 0 (0 to 0)     | 0 (0 to 0)  | 0% (0% to 0%)             |
| 12 | Liberia | Conflict and terrorism                          | 58 (11 to 179) | 0 (0 to 0)  | NA                        |
| 13 | Liberia | Cyclist road injuries                           | 1 (0 to 2)     | 1 (1 to 2)  | 6.4% (-0.1% to 13.7%)     |
| 14 | Liberia | Drowning                                        | 0 (0 to 0)     | 0 (0 to 0)  | -14.5% (-22% to -7.2%)    |
| 15 | Liberia | Environmental heat and cold exposure            | 0 (0 to 0)     | 0 (0 to 0)  | 0.7% (-5% to 8.1%)        |
| 16 | Liberia | Executions and police conflict                  | 0 (0 to 0)     | 0 (0 to 0)  | NA                        |
| 17 | Liberia | Exposure to forces of nature                    | 0 (0 to 0)     | 0 (0 to 0)  | NA                        |
| 18 | Liberia | Falls                                           | 2 (2 to 4)     | 3 (2 to 4)  | 18.3% (13.7% to 23%)      |
| 19 | Liberia | Fire, heat, and hot substances                  | 0 (0 to 0)     | 0 (0 to 0)  | -9.9% (-16.4% to -4.1%)   |
| 20 | Liberia | Foreign body in eyes                            | 0 (0 to 0)     | 0 (0 to 0)  | 0% (0% to 0%)             |
| 21 | Liberia | Foreign body in other body part                 | 1 (0 to 1)     | 1 (0 to 1)  | -0.3% (-4.1% to 3.3%)     |
| 22 | Liberia | Motor vehicle road injuries                     | 1 (1 to 3)     | 1 (1 to 2)  | -3% (-9.8% to 4.1%)       |
| 23 | Liberia | Motorcyclist road injuries                      | 1 (0 to 1)     | 1 (0 to 1)  | -0.7% (-7.9% to 7.3%)     |
| 24 | Liberia | Non-venomous animal contact                     | 0 (0 to 0)     | 0 (0 to 0)  | 4.4% (0.2% to 8.8%)       |
| 25 | Liberia | Other exposure to mechanical forces             | 0 (0 to 0)     | 0 (0 to 0)  | -12.3% (-17.3% to -7.5%)  |
| 26 | Liberia | Other road injuries                             | 0 (0 to 0)     | 0 (0 to 0)  | 7.8% (-1.3% to 17%)       |
| 27 | Liberia | Other transport injuries                        | 0 (0 to 0)     | 0 (0 to 0)  | -1.7% (-7.1% to 3.1%)     |
| 28 | Liberia | Other unintentional injuries                    | 0 (0 to 1)     | 0 (0 to 0)  | -15.4% (-20.7% to -10.3%) |
| 29 | Liberia | Pedestrian road injuries                        | 2 (1 to 3)     | 1 (1 to 3)  | -6.8% (-12.6% to -0.7%)   |
| 30 | Liberia | Physical violence by firearm                    | 0 (0 to 0)     | 0 (0 to 0)  | -0.9% (-15% to 15.6%)     |
| 31 | Liberia | Physical violence by other means                | 0 (0 to 0)     | 0 (0 to 0)  | -26.9% (-32.7% to -20.3%) |
| 32 | Liberia | Physical violence by sharp object               | 0 (0 to 0)     | 0 (0 to 0)  | -24.2% (-30.7% to -16.4%) |
| 33 | Liberia | Poisoning by carbon monoxide                    | 0 (0 to 0)     | 0 (0 to 0)  | 12.6% (-2.2% to 30.2%)    |
| 34 | Liberia | Poisoning by other means                        | 0 (0 to 0)     | 0 (0 to 0)  | -22.3% (-29.5% to -14.2%) |
| 35 | Liberia | Pulmonary aspiration and foreign body in airway | 0 (0 to 0)     | 0 (0 to 0)  | -11.2% (-21.7% to -0.8%)  |
| 36 | Liberia | Self-harm by firearm                            | 0 (0 to 0)     | 0 (0 to 0)  | 9.7% (-2.2% to 23%)       |
| 37 | Liberia | Self-harm by other specified means              | 0 (0 to 0)     | 0 (0 to 0)  | 12.3% (6.9% to 18.1%)     |
| 38 | Liberia | Unintentional firearm injuries                  | 0 (0 to 0)     | 0 (0 to 0)  | -19.3% (-26.2% to -12.6%) |
| 39 | Liberia | Venomous animal contact                         | 0 (0 to 0)     | 0 (0 to 0)  | 4.8% (-1.8% to 12.1%)     |
| 40 | Libya   | Adverse effects of medical treatment            | 0 (0 to 0)     | 0 (0 to 0)  | 0% (0% to 0%)             |
| 41 | Libya   | Conflict and terrorism                          | 0 (0 to 0)     | 6 (1 to 19) | NA                        |
| 42 | Libya   | Cyclist road injuries                           | 0 (0 to 0)     | 0 (0 to 0)  | 0% (-9.1% to 10.4%)       |
| 43 | Libya   | Drowning                                        | 0 (0 to 0)     | 0 (0 to 0)  | 25.1% (8.6% to 47.3%)     |
| 44 | Libya   | Environmental heat and cold exposure            | 0 (0 to 0)     | 0 (0 to 0)  | 0.2% (-4.6% to 4.6%)      |
| 45 |         |                                                 |                |             |                           |
| 46 |         |                                                 |                |             |                           |

|    |           |                                                 |             |            |                           |
|----|-----------|-------------------------------------------------|-------------|------------|---------------------------|
| 1  |           |                                                 |             |            |                           |
| 2  | Libya     | Executions and police conflict                  | 0 (0 to 0)  | 0 (0 to 0) | NA                        |
| 3  | Libya     | Exposure to forces of nature                    | 0 (0 to 0)  | 0 (0 to 0) | NA                        |
| 4  | Libya     | Falls                                           | 2 (1 to 2)  | 2 (2 to 3) | 19.4% (15% to 23.9%)      |
| 5  | Libya     | Fire, heat, and hot substances                  | 0 (0 to 0)  | 0 (0 to 0) | -26.3% (-31% to -21.3%)   |
| 6  | Libya     | Foreign body in eyes                            | 0 (0 to 0)  | 0 (0 to 0) | 0% (0% to 0%)             |
| 7  | Libya     | Foreign body in other body part                 | 0 (0 to 0)  | 0 (0 to 0) | -0.7% (-4.6% to 3.4%)     |
| 8  | Libya     | Motor vehicle road injuries                     | 1 (1 to 2)  | 1 (0 to 1) | -24.8% (-30.4% to -19.6%) |
| 9  | Libya     | Motorcyclist road injuries                      | 0 (0 to 0)  | 0 (0 to 0) | -10.9% (-21.2% to -0.1%)  |
| 10 | Libya     | Non-venomous animal contact                     | 0 (0 to 0)  | 0 (0 to 0) | 18.6% (13.3% to 23.5%)    |
| 11 | Libya     | Other exposure to mechanical forces             | 0 (0 to 1)  | 0 (0 to 0) | -18.1% (-23.3% to -13.2%) |
| 12 | Libya     | Other road injuries                             | 0 (0 to 0)  | 0 (0 to 0) | 0.8% (-9.3% to 10.7%)     |
| 13 | Libya     | Other transport injuries                        | 0 (0 to 0)  | 0 (0 to 0) | -1.8% (-6.3% to 2.9%)     |
| 14 | Libya     | Other unintentional injuries                    | 0 (0 to 0)  | 0 (0 to 0) | -10.1% (-14.8% to -5.1%)  |
| 15 | Libya     | Pedestrian road injuries                        | 0 (0 to 1)  | 0 (0 to 0) | -26% (-32.7% to -19.1%)   |
| 16 | Libya     | Physical violence by firearm                    | 0 (0 to 0)  | 0 (0 to 0) | 452.6% (353.8% to 602.8%) |
| 17 | Libya     | Physical violence by other means                | 0 (0 to 0)  | 1 (0 to 1) | 220% (169.9% to 282.4%)   |
| 18 | Libya     | Physical violence by sharp object               | 0 (0 to 0)  | 0 (0 to 0) | 129.3% (87.1% to 175.9%)  |
| 19 | Libya     | Poisoning by carbon monoxide                    | 0 (0 to 0)  | 0 (0 to 0) | 17.6% (5.6% to 30.5%)     |
| 20 | Libya     | Poisoning by other means                        | 0 (0 to 0)  | 0 (0 to 0) | -21.5% (-27.7% to -15%)   |
| 21 | Libya     | Pulmonary aspiration and foreign body in airway | 0 (0 to 0)  | 0 (0 to 0) | -3.9% (-11.5% to 4.3%)    |
| 22 | Libya     | Self-harm by firearm                            | 0 (0 to 0)  | 0 (0 to 0) | 31.3% (18.7% to 45.3%)    |
| 23 | Libya     | Self-harm by other specified means              | 0 (0 to 0)  | 0 (0 to 0) | 11.3% (5.2% to 17%)       |
| 24 | Libya     | Unintentional firearm injuries                  | 0 (0 to 0)  | 0 (0 to 0) | -11.7% (-18.7% to -4.6%)  |
| 25 | Libya     | Venomous animal contact                         | 0 (0 to 0)  | 0 (0 to 0) | 18.1% (10.8% to 25.5%)    |
| 26 | Lithuania | Adverse effects of medical treatment            | 0 (0 to 0)  | 0 (0 to 0) | 0% (0% to 0%)             |
| 27 | Lithuania | Conflict and terrorism                          | 0 (0 to 0)  | 0 (0 to 0) | NA                        |
| 28 | Lithuania | Cyclist road injuries                           | 1 (0 to 2)  | 1 (0 to 1) | -39.1% (-47% to -30.7%)   |
| 29 | Lithuania | Drowning                                        | 0 (0 to 0)  | 0 (0 to 0) | -14.4% (-23.2% to -4.9%)  |
| 30 | Lithuania | Environmental heat and cold exposure            | 0 (0 to 1)  | 0 (0 to 1) | 8% (0.3% to 18.4%)        |
| 31 | Lithuania | Executions and police conflict                  | 0 (0 to 0)  | 0 (0 to 0) | NA                        |
| 32 | Lithuania | Exposure to forces of nature                    | 0 (0 to 0)  | 0 (0 to 0) | NA                        |
| 33 | Lithuania | Falls                                           | 8 (6 to 10) | 7 (5 to 9) | -11.5% (-15.6% to -7.3%)  |
| 34 | Lithuania | Fire, heat, and hot substances                  | 0 (0 to 0)  | 0 (0 to 0) | -28.7% (-35.5% to -22%)   |
| 35 | Lithuania | Foreign body in eyes                            | 0 (0 to 0)  | 0 (0 to 0) | 0% (0% to 0%)             |
| 36 | Lithuania | Foreign body in other body part                 | 0 (0 to 0)  | 0 (0 to 0) | 1.9% (-2.4% to 6.3%)      |
| 37 | Lithuania | Motor vehicle road injuries                     | 3 (1 to 5)  | 2 (1 to 3) | -41.7% (-49.6% to -33.9%) |
| 38 | Lithuania | Motorcyclist road injuries                      | 0 (0 to 0)  | 0 (0 to 0) | -20.4% (-34.1% to -7.5%)  |
| 39 | Lithuania | Non-venomous animal contact                     | 0 (0 to 0)  | 0 (0 to 0) | -12.7% (-17.1% to -8.7%)  |
| 40 | Lithuania | Other exposure to mechanical forces             | 1 (1 to 2)  | 1 (0 to 2) | -11.3% (-18.6% to -4.4%)  |
| 41 | Lithuania | Other road injuries                             | 0 (0 to 0)  | 0 (0 to 0) | -44% (-53.2% to -33.7%)   |
| 42 | Lithuania | Other transport injuries                        | 0 (0 to 0)  | 0 (0 to 0) | -18.4% (-23.8% to -12.8%) |
| 43 | Lithuania | Other unintentional injuries                    | 0 (0 to 1)  | 0 (0 to 0) | -22.5% (-29.3% to -15.7%) |
| 44 | Lithuania | Pedestrian road injuries                        | 1 (1 to 2)  | 0 (0 to 1) | -63.8% (-68.7% to -58.4%) |
| 45 |           |                                                 |             |            |                           |
| 46 |           |                                                 |             |            |                           |

|    |            |                                                 |            |             |                           |
|----|------------|-------------------------------------------------|------------|-------------|---------------------------|
| 1  |            |                                                 |            |             |                           |
| 2  | Lithuania  | Physical violence by firearm                    | 0 (0 to 0) | 0 (0 to 0)  | -28.7% (-45.5% to -10.4%) |
| 3  | Lithuania  | Physical violence by other means                | 0 (0 to 1) | 0 (0 to 1)  | -21.8% (-29.8% to -12.4%) |
| 4  | Lithuania  | Physical violence by sharp object               | 0 (0 to 0) | 0 (0 to 0)  | -39.1% (-47.9% to -30.7%) |
| 5  | Lithuania  | Poisoning by carbon monoxide                    | 0 (0 to 0) | 0 (0 to 0)  | 4.2% (-6.6% to 15.5%)     |
| 6  | Lithuania  | Poisoning by other means                        | 0 (0 to 0) | 0 (0 to 0)  | -6.4% (-15.8% to 3.7%)    |
| 7  | Lithuania  | Pulmonary aspiration and foreign body in airway | 0 (0 to 0) | 0 (0 to 0)  | -17.1% (-23.6% to -10.7%) |
| 8  | Lithuania  | Self-harm by firearm                            | 0 (0 to 0) | 0 (0 to 0)  | -15.3% (-31.1% to 3%)     |
| 9  | Lithuania  | Self-harm by other specified means              | 1 (0 to 1) | 1 (0 to 1)  | -13.1% (-17.4% to -8%)    |
| 10 | Lithuania  | Unintentional firearm injuries                  | 0 (0 to 0) | 0 (0 to 0)  | -9.2% (-20.2% to 2.4%)    |
| 11 | Lithuania  | Venomous animal contact                         | 0 (0 to 0) | 0 (0 to 0)  | -4.5% (-10.4% to 2.6%)    |
| 12 | Luxembourg | Adverse effects of medical treatment            | 0 (0 to 0) | 0 (0 to 0)  | 0% (0% to 0%)             |
| 13 | Luxembourg | Conflict and terrorism                          | 0 (0 to 0) | 0 (0 to 0)  | NA                        |
| 14 | Luxembourg | Cyclist road injuries                           | 0 (0 to 0) | 0 (0 to 0)  | -18.2% (-29.2% to -5.4%)  |
| 15 | Luxembourg | Drowning                                        | 0 (0 to 0) | 0 (0 to 0)  | 79.1% (62.9% to 96.5%)    |
| 16 | Luxembourg | Environmental heat and cold exposure            | 0 (0 to 0) | 0 (0 to 0)  | 0.1% (-4.2% to 4.5%)      |
| 17 | Luxembourg | Executions and police conflict                  | 0 (0 to 0) | 0 (0 to 0)  | NA                        |
| 18 | Luxembourg | Exposure to forces of nature                    | 0 (0 to 0) | 0 (0 to 0)  | NA                        |
| 19 | Luxembourg | Falls                                           | 7 (5 to 9) | 7 (5 to 10) | 6.5% (1.8% to 11.4%)      |
| 20 | Luxembourg | Fire, heat, and hot substances                  | 0 (0 to 0) | 0 (0 to 0)  | -5.1% (-9.9% to 0.9%)     |
| 21 | Luxembourg | Foreign body in eyes                            | 0 (0 to 0) | 0 (0 to 0)  | 0% (0% to 0%)             |
| 22 | Luxembourg | Foreign body in other body part                 | 0 (0 to 0) | 0 (0 to 0)  | 2% (-1.9% to 5.9%)        |
| 23 | Luxembourg | Motor vehicle road injuries                     | 1 (0 to 1) | 0 (0 to 1)  | -55.4% (-61.8% to -49%)   |
| 24 | Luxembourg | Motorcyclist road injuries                      | 0 (0 to 0) | 0 (0 to 0)  | -11.7% (-27.1% to 7.1%)   |
| 25 | Luxembourg | Non-venomous animal contact                     | 0 (0 to 0) | 0 (0 to 0)  | -19.2% (-22.8% to -15.4%) |
| 26 | Luxembourg | Other exposure to mechanical forces             | 1 (0 to 1) | 0 (0 to 1)  | -22.9% (-30.2% to -15.8%) |
| 27 | Luxembourg | Other road injuries                             | 0 (0 to 0) | 0 (0 to 0)  | -3.2% (-16.8% to 12.8%)   |
| 28 | Luxembourg | Other transport injuries                        | 0 (0 to 0) | 0 (0 to 0)  | -0.1% (-5.7% to 5%)       |
| 29 | Luxembourg | Other unintentional injuries                    | 1 (0 to 1) | 0 (0 to 0)  | -46.9% (-51.2% to -42.2%) |
| 30 | Luxembourg | Pedestrian road injuries                        | 0 (0 to 0) | 0 (0 to 0)  | -60.1% (-67.3% to -51.9%) |
| 31 | Luxembourg | Physical violence by firearm                    | 0 (0 to 0) | 0 (0 to 0)  | 42.4% (25.4% to 65.3%)    |
| 32 | Luxembourg | Physical violence by other means                | 0 (0 to 0) | 0 (0 to 0)  | -26.5% (-34.6% to -18.1%) |
| 33 | Luxembourg | Physical violence by sharp object               | 0 (0 to 0) | 0 (0 to 0)  | -26.1% (-37% to -16.3%)   |
| 34 | Luxembourg | Poisoning by carbon monoxide                    | 0 (0 to 0) | 0 (0 to 0)  | 4.7% (-3.5% to 13.1%)     |
| 35 | Luxembourg | Poisoning by other means                        | 0 (0 to 0) | 0 (0 to 0)  | -9% (-14.8% to -3.6%)     |
| 36 | Luxembourg | Pulmonary aspiration and foreign body in airway | 0 (0 to 0) | 0 (0 to 0)  | -22.4% (-29.4% to -16.3%) |
| 37 | Luxembourg | Self-harm by firearm                            | 0 (0 to 0) | 0 (0 to 0)  | 4.9% (-8.9% to 21.4%)     |
| 38 | Luxembourg | Self-harm by other specified means              | 0 (0 to 1) | 0 (0 to 0)  | -39% (-43.9% to -33.8%)   |
| 39 | Luxembourg | Unintentional firearm injuries                  | 0 (0 to 0) | 0 (0 to 0)  | -1.6% (-10.6% to 8%)      |
| 40 | Luxembourg | Venomous animal contact                         | 0 (0 to 0) | 0 (0 to 0)  | -18.3% (-23.5% to -12%)   |
| 41 | Madagascar | Adverse effects of medical treatment            | 0 (0 to 0) | 0 (0 to 0)  | 0% (0% to 0%)             |
| 42 | Madagascar | Conflict and terrorism                          | 0 (0 to 0) | 0 (0 to 0)  | NA                        |
| 43 | Madagascar | Cyclist road injuries                           | 1 (1 to 3) | 1 (1 to 3)  | -3.2% (-9.9% to 4.4%)     |
| 44 | Madagascar | Drowning                                        | 0 (0 to 0) | 0 (0 to 0)  | -12.3% (-20.3% to -4.1%)  |
| 45 |            |                                                 |            |             |                           |
| 46 |            |                                                 |            |             |                           |

|    |            |                                                 |            |            |                           |
|----|------------|-------------------------------------------------|------------|------------|---------------------------|
| 1  |            |                                                 |            |            |                           |
| 2  | Madagascar | Environmental heat and cold exposure            | 0 (0 to 0) | 0 (0 to 0) | -3.6% (-9.2% to 2.5%)     |
| 3  | Madagascar | Executions and police conflict                  | 0 (0 to 0) | 0 (0 to 0) | NA                        |
| 4  | Madagascar | Exposure to forces of nature                    | 0 (0 to 0) | 0 (0 to 0) | NA                        |
| 5  | Madagascar | Falls                                           | 3 (2 to 4) | 3 (2 to 5) | 13.5% (9% to 17.9%)       |
| 6  | Madagascar | Fire, heat, and hot substances                  | 0 (0 to 0) | 0 (0 to 0) | -14.5% (-19.8% to -9.6%)  |
| 7  | Madagascar | Foreign body in eyes                            | 0 (0 to 0) | 0 (0 to 0) | 0% (0% to 0%)             |
| 8  | Madagascar | Foreign body in other body part                 | 1 (0 to 1) | 1 (0 to 1) | 3.8% (-0.8% to 8.3%)      |
| 9  | Madagascar | Motor vehicle road injuries                     | 1 (1 to 3) | 1 (1 to 2) | -12.1% (-19.7% to -4%)    |
| 10 | Madagascar | Motorcyclist road injuries                      | 0 (0 to 1) | 0 (0 to 1) | -12.7% (-20.2% to -4.2%)  |
| 11 | Madagascar | Non-venomous animal contact                     | 1 (0 to 1) | 0 (0 to 1) | -10% (-14.5% to -5.9%)    |
| 12 | Madagascar | Other exposure to mechanical forces             | 0 (0 to 1) | 0 (0 to 1) | -11.3% (-17% to -5%)      |
| 13 | Madagascar | Other road injuries                             | 0 (0 to 0) | 0 (0 to 0) | 6.2% (-3.7% to 17.2%)     |
| 14 | Madagascar | Other transport injuries                        | 0 (0 to 1) | 0 (0 to 1) | -3.3% (-8.2% to 1.5%)     |
| 15 | Madagascar | Other unintentional injuries                    | 0 (0 to 1) | 0 (0 to 0) | -12.2% (-17.8% to -6%)    |
| 16 | Madagascar | Pedestrian road injuries                        | 2 (1 to 5) | 2 (1 to 4) | -16.8% (-22.4% to -10.4%) |
| 17 | Madagascar | Physical violence by firearm                    | 0 (0 to 0) | 0 (0 to 0) | 17.8% (5.7% to 32.8%)     |
| 18 | Madagascar | Physical violence by other means                | 0 (0 to 0) | 0 (0 to 0) | 5.8% (-1.7% to 15.4%)     |
| 19 | Madagascar | Physical violence by sharp object               | 0 (0 to 0) | 0 (0 to 0) | 7.5% (-2.1% to 19.5%)     |
| 20 | Madagascar | Poisoning by carbon monoxide                    | 0 (0 to 0) | 0 (0 to 0) | 14.6% (1.4% to 31.1%)     |
| 21 | Madagascar | Poisoning by other means                        | 0 (0 to 0) | 0 (0 to 0) | -21.7% (-29.5% to -13%)   |
| 22 | Madagascar | Pulmonary aspiration and foreign body in airway | 0 (0 to 0) | 0 (0 to 0) | -7.9% (-18.5% to 2.2%)    |
| 23 | Madagascar | Self-harm by firearm                            | 0 (0 to 0) | 0 (0 to 0) | 12.1% (0% to 27.1%)       |
| 24 | Madagascar | Self-harm by other specified means              | 0 (0 to 0) | 0 (0 to 0) | -12.9% (-17.7% to -8.4%)  |
| 25 | Madagascar | Unintentional firearm injuries                  | 0 (0 to 0) | 0 (0 to 0) | -14.4% (-21.8% to -7.3%)  |
| 26 | Madagascar | Venomous animal contact                         | 0 (0 to 0) | 0 (0 to 0) | -21% (-27.6% to -15.1%)   |
| 27 | Malawi     | Adverse effects of medical treatment            | 0 (0 to 0) | 0 (0 to 0) | 0% (0% to 0%)             |
| 28 | Malawi     | Conflict and terrorism                          | 0 (0 to 0) | 0 (0 to 0) | NA                        |
| 29 | Malawi     | Cyclist road injuries                           | 1 (1 to 2) | 1 (1 to 2) | -2.2% (-8.2% to 5.1%)     |
| 30 | Malawi     | Drowning                                        | 0 (0 to 0) | 0 (0 to 0) | -4.9% (-12% to 1.7%)      |
| 31 | Malawi     | Environmental heat and cold exposure            | 0 (0 to 0) | 0 (0 to 0) | -2.6% (-7.7% to 3.8%)     |
| 32 | Malawi     | Executions and police conflict                  | 0 (0 to 0) | 0 (0 to 0) | NA                        |
| 33 | Malawi     | Exposure to forces of nature                    | 0 (0 to 0) | 0 (0 to 0) | NA                        |
| 34 | Malawi     | Falls                                           | 3 (2 to 5) | 4 (3 to 6) | 18.9% (14.6% to 23.2%)    |
| 35 | Malawi     | Fire, heat, and hot substances                  | 0 (0 to 0) | 0 (0 to 0) | -7.9% (-13.6% to -2.7%)   |
| 36 | Malawi     | Foreign body in eyes                            | 0 (0 to 0) | 0 (0 to 0) | 0% (0% to 0%)             |
| 37 | Malawi     | Foreign body in other body part                 | 1 (0 to 1) | 1 (0 to 1) | -2.5% (-6.3% to 1.9%)     |
| 38 | Malawi     | Motor vehicle road injuries                     | 1 (0 to 2) | 1 (0 to 2) | -5% (-12.6% to 3.4%)      |
| 39 | Malawi     | Motorcyclist road injuries                      | 0 (0 to 1) | 0 (0 to 1) | -18.7% (-25.6% to -11.5%) |
| 40 | Malawi     | Non-venomous animal contact                     | 0 (0 to 1) | 0 (0 to 1) | -11.9% (-16.3% to -7.5%)  |
| 41 | Malawi     | Other exposure to mechanical forces             | 0 (0 to 0) | 0 (0 to 0) | -2.6% (-8% to 3%)         |
| 42 | Malawi     | Other road injuries                             | 0 (0 to 0) | 0 (0 to 0) | 1.7% (-7.4% to 12.4%)     |
| 43 | Malawi     | Other transport injuries                        | 0 (0 to 0) | 0 (0 to 0) | 0% (-4.6% to 4.6%)        |
| 44 | Malawi     | Other unintentional injuries                    | 0 (0 to 0) | 0 (0 to 0) | -7.3% (-14% to -0.4%)     |
| 45 |            |                                                 |            |            |                           |
| 46 |            |                                                 |            |            |                           |

|    |          |                                                 |            |            |                           |
|----|----------|-------------------------------------------------|------------|------------|---------------------------|
| 1  |          |                                                 |            |            |                           |
| 2  | Malawi   | Pedestrian road injuries                        | 2 (1 to 3) | 2 (1 to 3) | -11.9% (-17.4% to -4.6%)  |
| 3  | Malawi   | Physical violence by firearm                    | 0 (0 to 0) | 0 (0 to 0) | 34.6% (21.7% to 52%)      |
| 4  | Malawi   | Physical violence by other means                | 0 (0 to 0) | 0 (0 to 0) | 8.9% (3.3% to 15.8%)      |
| 5  | Malawi   | Physical violence by sharp object               | 0 (0 to 0) | 0 (0 to 0) | 9% (2.1% to 17.3%)        |
| 6  | Malawi   | Poisoning by carbon monoxide                    | 0 (0 to 0) | 0 (0 to 0) | 13.3% (0.6% to 25.9%)     |
| 7  | Malawi   | Poisoning by other means                        | 0 (0 to 0) | 0 (0 to 0) | -17.3% (-24.2% to -9.7%)  |
| 8  | Malawi   | Pulmonary aspiration and foreign body in airway | 0 (0 to 0) | 0 (0 to 0) | -11.4% (-21.2% to -1.1%)  |
| 9  | Malawi   | Self-harm by firearm                            | 0 (0 to 0) | 0 (0 to 0) | 13.9% (1.1% to 31%)       |
| 10 | Malawi   | Self-harm by other specified means              | 0 (0 to 0) | 0 (0 to 0) | -11.2% (-16.7% to -5%)    |
| 11 | Malawi   | Unintentional firearm injuries                  | 0 (0 to 0) | 0 (0 to 0) | -9.9% (-18.1% to -1.3%)   |
| 12 | Malawi   | Venomous animal contact                         | 0 (0 to 0) | 0 (0 to 0) | -13.6% (-22.7% to -4.5%)  |
| 13 | Malaysia | Adverse effects of medical treatment            | 0 (0 to 0) | 0 (0 to 0) | 0% (0% to 0%)             |
| 14 | Malaysia | Conflict and terrorism                          | 0 (0 to 0) | 0 (0 to 0) | NA                        |
| 15 | Malaysia | Cyclist road injuries                           | 0 (0 to 0) | 0 (0 to 0) | 1.2% (-8% to 10.3%)       |
| 16 | Malaysia | Drowning                                        | 0 (0 to 0) | 0 (0 to 0) | 49.6% (34.9% to 64.4%)    |
| 17 | Malaysia | Environmental heat and cold exposure            | 0 (0 to 0) | 0 (0 to 0) | 3.8% (-0.4% to 8.8%)      |
| 18 | Malaysia | Executions and police conflict                  | 0 (0 to 0) | 0 (0 to 0) | NA                        |
| 19 | Malaysia | Exposure to forces of nature                    | 0 (0 to 0) | 0 (0 to 0) | NA                        |
| 20 | Malaysia | Falls                                           | 1 (1 to 2) | 2 (1 to 3) | 41.2% (36% to 45.8%)      |
| 21 | Malaysia | Fire, heat, and hot substances                  | 0 (0 to 0) | 0 (0 to 0) | -10.9% (-15.1% to -6.7%)  |
| 22 | Malaysia | Foreign body in eyes                            | 0 (0 to 0) | 0 (0 to 0) | 0% (0% to 0%)             |
| 23 | Malaysia | Foreign body in other body part                 | 0 (0 to 0) | 0 (0 to 0) | 0.7% (-2.5% to 4.4%)      |
| 24 | Malaysia | Motor vehicle road injuries                     | 1 (0 to 1) | 1 (0 to 1) | 8.1% (-0.9% to 18.5%)     |
| 25 | Malaysia | Motorcyclist road injuries                      | 1 (0 to 1) | 1 (0 to 1) | 5.2% (-4.2% to 16.8%)     |
| 26 | Malaysia | Non-venomous animal contact                     | 0 (0 to 0) | 0 (0 to 0) | -24.8% (-28.6% to -21.2%) |
| 27 | Malaysia | Other exposure to mechanical forces             | 0 (0 to 0) | 0 (0 to 0) | -10.7% (-16.2% to -5.5%)  |
| 28 | Malaysia | Other road injuries                             | 0 (0 to 0) | 0 (0 to 0) | -0.9% (-10.7% to 8.7%)    |
| 29 | Malaysia | Other transport injuries                        | 0 (0 to 0) | 0 (0 to 0) | -13.2% (-17.5% to -8.6%)  |
| 30 | Malaysia | Other unintentional injuries                    | 0 (0 to 0) | 0 (0 to 0) | -18.8% (-24.7% to -13.9%) |
| 31 | Malaysia | Pedestrian road injuries                        | 0 (0 to 0) | 0 (0 to 0) | -10.7% (-18.5% to -3.1%)  |
| 32 | Malaysia | Physical violence by firearm                    | 0 (0 to 0) | 0 (0 to 0) | 82.1% (65.6% to 103.8%)   |
| 33 | Malaysia | Physical violence by other means                | 0 (0 to 0) | 0 (0 to 0) | 6.1% (-1.1% to 14.1%)     |
| 34 | Malaysia | Physical violence by sharp object               | 0 (0 to 0) | 0 (0 to 0) | 0.5% (-8.3% to 10.8%)     |
| 35 | Malaysia | Poisoning by carbon monoxide                    | 0 (0 to 0) | 0 (0 to 0) | 28.3% (16.5% to 41%)      |
| 36 | Malaysia | Poisoning by other means                        | 0 (0 to 0) | 0 (0 to 0) | -20.7% (-26.8% to -14.2%) |
| 37 | Malaysia | Pulmonary aspiration and foreign body in airway | 0 (0 to 0) | 0 (0 to 0) | -17.4% (-24.9% to -9.4%)  |
| 38 | Malaysia | Self-harm by firearm                            | 0 (0 to 0) | 0 (0 to 0) | 26.5% (8.3% to 49.9%)     |
| 39 | Malaysia | Self-harm by other specified means              | 0 (0 to 0) | 0 (0 to 0) | -3.8% (-9.6% to 2.8%)     |
| 40 | Malaysia | Unintentional firearm injuries                  | 0 (0 to 0) | 0 (0 to 0) | -5.7% (-11.7% to 0.4%)    |
| 41 | Malaysia | Venomous animal contact                         | 0 (0 to 0) | 0 (0 to 0) | -29.5% (-35.9% to -22.9%) |
| 42 | Maldives | Adverse effects of medical treatment            | 0 (0 to 0) | 0 (0 to 0) | 0% (0% to 0%)             |
| 43 | Maldives | Conflict and terrorism                          | 0 (0 to 0) | 0 (0 to 0) | NA                        |
| 44 | Maldives | Cyclist road injuries                           | 0 (0 to 0) | 0 (0 to 0) | -33.3% (-41.7% to -24.8%) |
| 45 |          |                                                 |            |            |                           |
| 46 |          |                                                 |            |            |                           |



|    |          |                                                 |            |            |                           |
|----|----------|-------------------------------------------------|------------|------------|---------------------------|
| 1  |          |                                                 |            |            |                           |
| 2  | Maldives | Drowning                                        | 0 (0 to 0) | 0 (0 to 0) | 35.8% (19.8% to 55.2%)    |
| 3  | Maldives | Environmental heat and cold exposure            | 0 (0 to 0) | 0 (0 to 0) | -6.4% (-10.9% to -1%)     |
| 4  | Maldives | Executions and police conflict                  | 0 (0 to 0) | 0 (0 to 0) | NA                        |
| 5  | Maldives | Exposure to forces of nature                    | 0 (0 to 0) | 0 (0 to 0) | NA                        |
| 6  | Maldives | Falls                                           | 1 (1 to 2) | 2 (1 to 3) | 52.9% (46.3% to 59.7%)    |
| 7  | Maldives | Fire, heat, and hot substances                  | 0 (0 to 0) | 0 (0 to 0) | -35.9% (-43.2% to -29.2%) |
| 8  | Maldives | Foreign body in eyes                            | 0 (0 to 0) | 0 (0 to 0) | 0% (0% to 0%)             |
| 9  | Maldives | Foreign body in other body part                 | 0 (0 to 0) | 0 (0 to 0) | 1.7% (-2.1% to 5.8%)      |
| 10 | Maldives | Motor vehicle road injuries                     | 0 (0 to 0) | 0 (0 to 0) | -11.9% (-20% to -1.7%)    |
| 11 | Maldives | Motorcyclist road injuries                      | 1 (0 to 1) | 0 (0 to 1) | -28.7% (-34.9% to -21.8%) |
| 12 | Maldives | Non-venomous animal contact                     | 0 (0 to 0) | 0 (0 to 0) | -33.9% (-39.5% to -28.4%) |
| 13 | Maldives | Other exposure to mechanical forces             | 0 (0 to 0) | 0 (0 to 0) | -23.1% (-30.9% to -15.3%) |
| 14 | Maldives | Other road injuries                             | 0 (0 to 0) | 0 (0 to 0) | 9% (-2.5% to 23.1%)       |
| 15 | Maldives | Other transport injuries                        | 0 (0 to 0) | 0 (0 to 0) | 4.9% (-2% to 11.2%)       |
| 16 | Maldives | Other unintentional injuries                    | 0 (0 to 0) | 0 (0 to 0) | -30.8% (-37.5% to -22.9%) |
| 17 | Maldives | Pedestrian road injuries                        | 0 (0 to 0) | 0 (0 to 0) | -19.3% (-28.3% to -8.4%)  |
| 18 | Maldives | Physical violence by firearm                    | 0 (0 to 0) | 0 (0 to 0) | 183.8% (148.9% to 232.1%) |
| 19 | Maldives | Physical violence by other means                | 0 (0 to 0) | 0 (0 to 0) | 21.6% (9.9% to 32.5%)     |
| 20 | Maldives | Physical violence by sharp object               | 0 (0 to 0) | 0 (0 to 0) | 18.7% (5.6% to 31.7%)     |
| 21 | Maldives | Poisoning by carbon monoxide                    | 0 (0 to 0) | 0 (0 to 0) | 48.5% (32.6% to 66.7%)    |
| 22 | Maldives | Poisoning by other means                        | 0 (0 to 0) | 0 (0 to 0) | 10.5% (3.9% to 16.7%)     |
| 23 | Maldives | Pulmonary aspiration and foreign body in airway | 0 (0 to 0) | 0 (0 to 0) | -37.2% (-44.1% to -29.2%) |
| 24 | Maldives | Self-harm by firearm                            | 0 (0 to 0) | 0 (0 to 0) | 35.9% (14.5% to 63.7%)    |
| 25 | Maldives | Self-harm by other specified means              | 0 (0 to 0) | 0 (0 to 0) | -23% (-28.8% to -15.9%)   |
| 26 | Maldives | Unintentional firearm injuries                  | 0 (0 to 0) | 0 (0 to 0) | -13% (-21.6% to -2.5%)    |
| 27 | Maldives | Venomous animal contact                         | 0 (0 to 0) | 0 (0 to 0) | -22.3% (-29.6% to -13.1%) |
| 28 | Mali     | Adverse effects of medical treatment            | 0 (0 to 0) | 0 (0 to 0) | 0% (0% to 0%)             |
| 29 | Mali     | Conflict and terrorism                          | 2 (0 to 6) | 1 (0 to 4) | NA                        |
| 30 | Mali     | Cyclist road injuries                           | 1 (0 to 2) | 1 (1 to 2) | 20% (11.8% to 28.8%)      |
| 31 | Mali     | Drowning                                        | 0 (0 to 0) | 0 (0 to 0) | -8.5% (-16.1% to -1%)     |
| 32 | Mali     | Environmental heat and cold exposure            | 0 (0 to 0) | 0 (0 to 0) | -1.5% (-6.4% to 5.1%)     |
| 33 | Mali     | Executions and police conflict                  | 0 (0 to 0) | 0 (0 to 0) | NA                        |
| 34 | Mali     | Exposure to forces of nature                    | 0 (0 to 0) | 0 (0 to 0) | NA                        |
| 35 | Mali     | Falls                                           | 3 (2 to 4) | 3 (2 to 5) | 19% (14.6% to 23.6%)      |
| 36 | Mali     | Fire, heat, and hot substances                  | 0 (0 to 0) | 0 (0 to 0) | -8.8% (-14.3% to -2.9%)   |
| 37 | Mali     | Foreign body in eyes                            | 0 (0 to 0) | 0 (0 to 0) | 0% (0% to 0%)             |
| 38 | Mali     | Foreign body in other body part                 | 1 (0 to 1) | 1 (0 to 1) | 0.8% (-2.9% to 4.2%)      |
| 39 | Mali     | Motor vehicle road injuries                     | 1 (1 to 3) | 2 (1 to 3) | 9.2% (1.5% to 18.5%)      |
| 40 | Mali     | Motorcyclist road injuries                      | 1 (0 to 1) | 1 (0 to 1) | -0.6% (-8.5% to 7.7%)     |
| 41 | Mali     | Non-venomous animal contact                     | 0 (0 to 1) | 0 (0 to 0) | -16.2% (-20% to -11.9%)   |
| 42 | Mali     | Other exposure to mechanical forces             | 0 (0 to 0) | 0 (0 to 0) | -9% (-13.3% to -3.7%)     |
| 43 | Mali     | Other road injuries                             | 0 (0 to 0) | 0 (0 to 0) | 16.8% (5.3% to 28.3%)     |
| 44 | Mali     | Other transport injuries                        | 0 (0 to 0) | 0 (0 to 0) | -12% (-16.4% to -7.5%)    |
| 45 |          |                                                 |            |            |                           |
| 46 |          |                                                 |            |            |                           |

|    |                  |                                                 |            |            |                           |
|----|------------------|-------------------------------------------------|------------|------------|---------------------------|
| 1  |                  |                                                 |            |            |                           |
| 2  | Mali             | Other unintentional injuries                    | 0 (0 to 0) | 0 (0 to 0) | -17.2% (-21.3% to -12.8%) |
| 3  | Mali             | Pedestrian road injuries                        | 2 (1 to 4) | 2 (1 to 3) | -11.1% (-17.6% to -5%)    |
| 4  | Mali             | Physical violence by firearm                    | 0 (0 to 0) | 0 (0 to 0) | 20.3% (8% to 35.8%)       |
| 5  | Mali             | Physical violence by other means                | 0 (0 to 0) | 0 (0 to 0) | 1.6% (-3.9% to 7.4%)      |
| 6  | Mali             | Physical violence by sharp object               | 0 (0 to 0) | 0 (0 to 0) | 1.9% (-4.6% to 9.5%)      |
| 7  | Mali             | Poisoning by carbon monoxide                    | 0 (0 to 0) | 0 (0 to 0) | 13.4% (1.5% to 27.3%)     |
| 8  | Mali             | Poisoning by other means                        | 0 (0 to 0) | 0 (0 to 0) | -20.7% (-27.4% to -13.9%) |
| 9  | Mali             | Pulmonary aspiration and foreign body in airway | 0 (0 to 0) | 0 (0 to 0) | -14.8% (-22.4% to -7.6%)  |
| 10 | Mali             | Self-harm by firearm                            | 0 (0 to 0) | 0 (0 to 0) | 12.5% (2.2% to 26.5%)     |
| 11 | Mali             | Self-harm by other specified means              | 0 (0 to 0) | 0 (0 to 0) | -2.9% (-8.3% to 2.7%)     |
| 12 | Mali             | Unintentional firearm injuries                  | 0 (0 to 0) | 0 (0 to 0) | -17.3% (-24.8% to -9.9%)  |
| 13 | Mali             | Venomous animal contact                         | 0 (0 to 0) | 0 (0 to 0) | -13.4% (-19.6% to -6%)    |
| 14 | Malta            | Adverse effects of medical treatment            | 0 (0 to 0) | 0 (0 to 0) | 0% (0% to 0%)             |
| 15 | Malta            | Conflict and terrorism                          | 0 (0 to 0) | 0 (0 to 0) | NA                        |
| 16 | Malta            | Cyclist road injuries                           | 0 (0 to 0) | 0 (0 to 0) | -7.5% (-16.9% to 3%)      |
| 17 | Malta            | Drowning                                        | 0 (0 to 0) | 0 (0 to 0) | 71.8% (57.9% to 87.4%)    |
| 18 | Malta            | Environmental heat and cold exposure            | 0 (0 to 0) | 0 (0 to 0) | -8.8% (-13.4% to -3.5%)   |
| 19 | Malta            | Executions and police conflict                  | 0 (0 to 0) | 0 (0 to 0) | NA                        |
| 20 | Malta            | Exposure to forces of nature                    | 0 (0 to 0) | 0 (0 to 0) | NA                        |
| 21 | Malta            | Falls                                           | 6 (4 to 8) | 7 (5 to 9) | 13.2% (9.2% to 17.7%)     |
| 22 | Malta            | Fire, heat, and hot substances                  | 0 (0 to 0) | 0 (0 to 0) | -3.5% (-8.2% to 1%)       |
| 23 | Malta            | Foreign body in eyes                            | 0 (0 to 0) | 0 (0 to 0) | 0% (0% to 0%)             |
| 24 | Malta            | Foreign body in other body part                 | 0 (0 to 0) | 0 (0 to 0) | 2% (-1.3% to 5.9%)        |
| 25 | Malta            | Motor vehicle road injuries                     | 0 (0 to 1) | 0 (0 to 0) | -24.6% (-33.6% to -15.3%) |
| 26 | Malta            | Motocyclist road injuries                       | 0 (0 to 0) | 0 (0 to 0) | 4.6% (-11% to 24.1%)      |
| 27 | Malta            | Non-venomous animal contact                     | 0 (0 to 0) | 0 (0 to 0) | -18.3% (-21.3% to -15%)   |
| 28 | Malta            | Other exposure to mechanical forces             | 1 (0 to 1) | 0 (0 to 1) | -4.4% (-10.3% to 2.7%)    |
| 29 | Malta            | Other road injuries                             | 0 (0 to 0) | 0 (0 to 0) | -0.3% (-11% to 12.1%)     |
| 30 | Malta            | Other transport injuries                        | 0 (0 to 0) | 0 (0 to 0) | 3.3% (-1% to 7.9%)        |
| 31 | Malta            | Other unintentional injuries                    | 0 (0 to 0) | 0 (0 to 0) | -21.2% (-26.3% to -16.9%) |
| 32 | Malta            | Pedestrian road injuries                        | 0 (0 to 0) | 0 (0 to 0) | -23% (-34% to -11.7%)     |
| 33 | Malta            | Physical violence by firearm                    | 0 (0 to 0) | 0 (0 to 0) | 21.3% (12.3% to 32.8%)    |
| 34 | Malta            | Physical violence by other means                | 0 (0 to 0) | 0 (0 to 0) | -7.2% (-13.4% to -0.8%)   |
| 35 | Malta            | Physical violence by sharp object               | 0 (0 to 0) | 0 (0 to 0) | -6.3% (-14.3% to 2.7%)    |
| 36 | Malta            | Poisoning by carbon monoxide                    | 0 (0 to 0) | 0 (0 to 0) | 13.1% (3.3% to 22.8%)     |
| 37 | Malta            | Poisoning by other means                        | 0 (0 to 0) | 0 (0 to 0) | -1.6% (-8.7% to 4.9%)     |
| 38 | Malta            | Pulmonary aspiration and foreign body in airway | 0 (0 to 0) | 0 (0 to 0) | -12.1% (-19.5% to -4.6%)  |
| 39 | Malta            | Self-harm by firearm                            | 0 (0 to 0) | 0 (0 to 0) | 15.5% (3.4% to 27.1%)     |
| 40 | Malta            | Self-harm by other specified means              | 0 (0 to 0) | 0 (0 to 0) | 3.1% (-1.9% to 8.8%)      |
| 41 | Malta            | Unintentional firearm injuries                  | 0 (0 to 0) | 0 (0 to 0) | -5.3% (-13.7% to 3%)      |
| 42 | Malta            | Venomous animal contact                         | 0 (0 to 0) | 0 (0 to 0) | -18.3% (-23.5% to -12.8%) |
| 43 | Marshall Islands | Adverse effects of medical treatment            | 0 (0 to 0) | 0 (0 to 0) | 0% (0% to 0%)             |
| 44 | Marshall Islands | Conflict and terrorism                          | 0 (0 to 0) | 0 (0 to 0) | NA                        |
| 45 |                  |                                                 |            |            |                           |
| 46 |                  |                                                 |            |            |                           |

|    |                  |                                                 |            |            |                           |
|----|------------------|-------------------------------------------------|------------|------------|---------------------------|
| 1  |                  |                                                 |            |            |                           |
| 2  | Marshall Islands | Cyclist road injuries                           | 0 (0 to 0) | 0 (0 to 0) | 0.4% (-5.6% to 7.6%)      |
| 3  | Marshall Islands | Drowning                                        | 0 (0 to 0) | 0 (0 to 0) | 4.5% (-3.6% to 14.1%)     |
| 4  | Marshall Islands | Environmental heat and cold exposure            | 0 (0 to 0) | 0 (0 to 0) | -2.1% (-7.3% to 2.8%)     |
| 5  | Marshall Islands | Executions and police conflict                  | 0 (0 to 0) | 0 (0 to 0) | NA                        |
| 6  | Marshall Islands | Exposure to forces of nature                    | 0 (0 to 0) | 0 (0 to 0) | NA                        |
| 7  | Marshall Islands | Falls                                           | 1 (1 to 1) | 2 (1 to 2) | 37.9% (32.7% to 42.9%)    |
| 8  | Marshall Islands | Fire, heat, and hot substances                  | 0 (0 to 0) | 0 (0 to 0) | -0.7% (-5.5% to 4.6%)     |
| 9  | Marshall Islands | Foreign body in eyes                            | 0 (0 to 0) | 0 (0 to 0) | 0% (0% to 0%)             |
| 10 | Marshall Islands | Foreign body in other body part                 | 0 (0 to 0) | 0 (0 to 0) | -2.2% (-5.5% to 1.8%)     |
| 11 | Marshall Islands | Motor vehicle road injuries                     | 1 (0 to 1) | 1 (0 to 1) | -0.7% (-6.7% to 5.4%)     |
| 12 | Marshall Islands | Motorcyclist road injuries                      | 0 (0 to 0) | 0 (0 to 0) | -0.2% (-8.9% to 8.7%)     |
| 13 | Marshall Islands | Non-venomous animal contact                     | 0 (0 to 0) | 0 (0 to 0) | -14.6% (-18.2% to -10.7%) |
| 14 | Marshall Islands | Other exposure to mechanical forces             | 0 (0 to 0) | 0 (0 to 0) | -14% (-19.6% to -7.6%)    |
| 15 | Marshall Islands | Other road injuries                             | 0 (0 to 0) | 0 (0 to 0) | -0.4% (-8.6% to 8.9%)     |
| 16 | Marshall Islands | Other transport injuries                        | 0 (0 to 0) | 0 (0 to 0) | -2.8% (-7.2% to 1.6%)     |
| 17 | Marshall Islands | Other unintentional injuries                    | 0 (0 to 0) | 0 (0 to 0) | -3.6% (-7.6% to 0.8%)     |
| 18 | Marshall Islands | Pedestrian road injuries                        | 0 (0 to 0) | 0 (0 to 0) | -7.2% (-15% to 0.8%)      |
| 19 | Marshall Islands | Physical violence by firearm                    | 0 (0 to 0) | 0 (0 to 0) | -14.2% (-24% to -2.9%)    |
| 20 | Marshall Islands | Physical violence by other means                | 0 (0 to 1) | 0 (0 to 1) | -5.1% (-11.3% to 1.9%)    |
| 21 | Marshall Islands | Physical violence by sharp object               | 0 (0 to 0) | 0 (0 to 0) | -21.6% (-29.6% to -13%)   |
| 22 | Marshall Islands | Poisoning by carbon monoxide                    | 0 (0 to 0) | 0 (0 to 0) | 7.2% (-3.8% to 18.6%)     |
| 23 | Marshall Islands | Poisoning by other means                        | 0 (0 to 0) | 0 (0 to 0) | -15.6% (-22.3% to -8.3%)  |
| 24 | Marshall Islands | Pulmonary aspiration and foreign body in airway | 0 (0 to 0) | 0 (0 to 0) | 4.4% (-7% to 18.2%)       |
| 25 | Marshall Islands | Self-harm by firearm                            | 0 (0 to 0) | 0 (0 to 0) | -9.5% (-22.7% to 5.7%)    |
| 26 | Marshall Islands | Self-harm by other specified means              | 0 (0 to 1) | 0 (0 to 1) | 0% (-6.1% to 6.4%)        |
| 27 | Marshall Islands | Unintentional firearm injuries                  | 0 (0 to 0) | 0 (0 to 0) | -21.9% (-28% to -16.5%)   |
| 28 | Marshall Islands | Venomous animal contact                         | 0 (0 to 0) | 0 (0 to 0) | -8.6% (-14.3% to -1.7%)   |
| 29 | Mauritania       | Adverse effects of medical treatment            | 0 (0 to 0) | 0 (0 to 0) | 0% (0% to 0%)             |
| 30 | Mauritania       | Conflict and terrorism                          | 0 (0 to 1) | 0 (0 to 0) | NA                        |
| 31 | Mauritania       | Cyclist road injuries                           | 1 (1 to 2) | 1 (1 to 2) | -3.5% (-10.7% to 4.6%)    |
| 32 | Mauritania       | Drowning                                        | 0 (0 to 0) | 0 (0 to 0) | 12.4% (2.3% to 22.2%)     |
| 33 | Mauritania       | Environmental heat and cold exposure            | 0 (0 to 0) | 0 (0 to 0) | -6.9% (-11.7% to -2.1%)   |
| 34 | Mauritania       | Executions and police conflict                  | 0 (0 to 0) | 0 (0 to 0) | NA                        |
| 35 | Mauritania       | Exposure to forces of nature                    | 0 (0 to 0) | 0 (0 to 0) | NA                        |
| 36 | Mauritania       | Falls                                           | 3 (2 to 4) | 3 (2 to 5) | 18.9% (14.1% to 23.6%)    |
| 37 | Mauritania       | Fire, heat, and hot substances                  | 0 (0 to 0) | 0 (0 to 0) | -8.6% (-14% to -3.5%)     |
| 38 | Mauritania       | Foreign body in eyes                            | 0 (0 to 0) | 0 (0 to 0) | 0% (0% to 0%)             |
| 39 | Mauritania       | Foreign body in other body part                 | 1 (0 to 1) | 1 (0 to 1) | -1.3% (-5.2% to 2.5%)     |
| 40 | Mauritania       | Motor vehicle road injuries                     | 3 (1 to 5) | 3 (1 to 5) | -9.9% (-16.4% to -2.7%)   |
| 41 | Mauritania       | Motorcyclist road injuries                      | 1 (0 to 2) | 1 (0 to 2) | -18.4% (-25.3% to -11.2%) |
| 42 | Mauritania       | Non-venomous animal contact                     | 0 (0 to 0) | 0 (0 to 0) | -10.6% (-14.6% to -6.8%)  |
| 43 | Mauritania       | Other exposure to mechanical forces             | 0 (0 to 0) | 0 (0 to 0) | -14.7% (-19.8% to -9.6%)  |
| 44 | Mauritania       | Other road injuries                             | 0 (0 to 0) | 0 (0 to 0) | -5.3% (-13.8% to 4.8%)    |
| 45 |                  |                                                 |            |            |                           |
| 46 |                  |                                                 |            |            |                           |

|    |            |                                                 |            |            |                           |
|----|------------|-------------------------------------------------|------------|------------|---------------------------|
| 1  |            |                                                 |            |            |                           |
| 2  | Mauritania | Other transport injuries                        | 0 (0 to 1) | 0 (0 to 0) | -16.3% (-21.5% to -11.7%) |
| 3  | Mauritania | Other unintentional injuries                    | 0 (0 to 0) | 0 (0 to 0) | -17.3% (-21.7% to -12.1%) |
| 4  | Mauritania | Pedestrian road injuries                        | 3 (1 to 5) | 2 (1 to 4) | -20.7% (-26.2% to -15%)   |
| 5  | Mauritania | Physical violence by firearm                    | 0 (0 to 0) | 0 (0 to 0) | 45.7% (25.2% to 73%)      |
| 6  | Mauritania | Physical violence by other means                | 0 (0 to 0) | 0 (0 to 0) | 1.3% (-4.3% to 7%)        |
| 7  | Mauritania | Physical violence by sharp object               | 0 (0 to 0) | 0 (0 to 0) | 2.4% (-5.2% to 10.8%)     |
| 8  | Mauritania | Poisoning by carbon monoxide                    | 0 (0 to 0) | 0 (0 to 0) | 26.7% (13.8% to 41.5%)    |
| 9  | Mauritania | Poisoning by other means                        | 0 (0 to 0) | 0 (0 to 0) | -14.2% (-21.7% to -6.7%)  |
| 10 | Mauritania | Pulmonary aspiration and foreign body in airway | 0 (0 to 0) | 0 (0 to 0) | -1.9% (-9.3% to 6.2%)     |
| 11 | Mauritania | Self-harm by firearm                            | 0 (0 to 0) | 0 (0 to 0) | 5.5% (-4.5% to 18.4%)     |
| 12 | Mauritania | Self-harm by other specified means              | 0 (0 to 0) | 0 (0 to 0) | -6% (-11.3% to -0.7%)     |
| 13 | Mauritania | Unintentional firearm injuries                  | 0 (0 to 0) | 0 (0 to 0) | -17.5% (-25% to -9%)      |
| 14 | Mauritania | Venomous animal contact                         | 0 (0 to 0) | 0 (0 to 0) | -11% (-16.8% to -4.9%)    |
| 15 | Mauritius  | Adverse effects of medical treatment            | 0 (0 to 0) | 0 (0 to 0) | 0% (0% to 0%)             |
| 16 | Mauritius  | Conflict and terrorism                          | 0 (0 to 0) | 0 (0 to 0) | NA                        |
| 17 | Mauritius  | Cyclist road injuries                           | 0 (0 to 1) | 0 (0 to 1) | 8% (-5.9% to 24.9%)       |
| 18 | Mauritius  | Drowning                                        | 0 (0 to 0) | 0 (0 to 0) | 21.5% (12.2% to 31.7%)    |
| 19 | Mauritius  | Environmental heat and cold exposure            | 0 (0 to 0) | 0 (0 to 0) | -1.3% (-5.8% to 3.4%)     |
| 20 | Mauritius  | Executions and police conflict                  | 0 (0 to 0) | 0 (0 to 0) | NA                        |
| 21 | Mauritius  | Exposure to forces of nature                    | 0 (0 to 0) | 0 (0 to 0) | NA                        |
| 22 | Mauritius  | Falls                                           | 3 (2 to 4) | 5 (3 to 7) | 72.2% (64.8% to 80%)      |
| 23 | Mauritius  | Fire, heat, and hot substances                  | 0 (0 to 0) | 0 (0 to 0) | -55.1% (-59.9% to -50.4%) |
| 24 | Mauritius  | Foreign body in eyes                            | 0 (0 to 0) | 0 (0 to 0) | 0% (0% to 0%)             |
| 25 | Mauritius  | Foreign body in other body part                 | 0 (0 to 0) | 0 (0 to 0) | 1.9% (-2% to 5.5%)        |
| 26 | Mauritius  | Motor vehicle road injuries                     | 1 (1 to 2) | 1 (0 to 2) | -27.4% (-38.1% to -16.8%) |
| 27 | Mauritius  | Motorcyclist road injuries                      | 1 (1 to 2) | 2 (1 to 3) | 41.7% (24.2% to 68.4%)    |
| 28 | Mauritius  | Non-venomous animal contact                     | 0 (0 to 0) | 0 (0 to 0) | -19.9% (-23.1% to -16.4%) |
| 29 | Mauritius  | Other exposure to mechanical forces             | 0 (0 to 0) | 0 (0 to 0) | 4.4% (0% to 9.1%)         |
| 30 | Mauritius  | Other road injuries                             | 0 (0 to 0) | 0 (0 to 0) | 6.2% (-8.8% to 22.7%)     |
| 31 | Mauritius  | Other transport injuries                        | 0 (0 to 0) | 0 (0 to 0) | 19.1% (7.8% to 29.7%)     |
| 32 | Mauritius  | Other unintentional injuries                    | 0 (0 to 0) | 0 (0 to 0) | -4.6% (-11.7% to 1.8%)    |
| 33 | Mauritius  | Pedestrian road injuries                        | 1 (0 to 1) | 1 (0 to 1) | -27.5% (-37.1% to -17.9%) |
| 34 | Mauritius  | Physical violence by firearm                    | 0 (0 to 0) | 0 (0 to 0) | 41.4% (27.7% to 59.4%)    |
| 35 | Mauritius  | Physical violence by other means                | 0 (0 to 1) | 0 (0 to 1) | 9.7% (1.5% to 17.7%)      |
| 36 | Mauritius  | Physical violence by sharp object               | 0 (0 to 0) | 0 (0 to 0) | 33.8% (18.2% to 54.1%)    |
| 37 | Mauritius  | Poisoning by carbon monoxide                    | 0 (0 to 0) | 0 (0 to 0) | 55.2% (35.9% to 81.7%)    |
| 38 | Mauritius  | Poisoning by other means                        | 0 (0 to 0) | 0 (0 to 0) | -3.9% (-9.5% to 1.9%)     |
| 39 | Mauritius  | Pulmonary aspiration and foreign body in airway | 0 (0 to 0) | 0 (0 to 0) | -2.2% (-11.3% to 8.8%)    |
| 40 | Mauritius  | Self-harm by firearm                            | 0 (0 to 0) | 0 (0 to 0) | -1.9% (-16.6% to 18.8%)   |
| 41 | Mauritius  | Self-harm by other specified means              | 0 (0 to 0) | 0 (0 to 0) | -24% (-28.9% to -18.3%)   |
| 42 | Mauritius  | Unintentional firearm injuries                  | 0 (0 to 0) | 0 (0 to 0) | 5.2% (-1.3% to 12.6%)     |
| 43 | Mauritius  | Venomous animal contact                         | 0 (0 to 0) | 0 (0 to 0) | -18.1% (-23.8% to -11%)   |
| 44 | Mexico     | Adverse effects of medical treatment            | 0 (0 to 0) | 0 (0 to 0) | 0% (0% to 0%)             |
| 45 |            |                                                 |            |            |                           |
| 46 |            |                                                 |            |            |                           |

|    |                                  |                                                 |              |             |                           |
|----|----------------------------------|-------------------------------------------------|--------------|-------------|---------------------------|
| 1  |                                  |                                                 |              |             |                           |
| 2  | Mexico                           | Conflict and terrorism                          | 0 (0 to 0)   | 0 (0 to 0)  | NA                        |
| 3  | Mexico                           | Cyclist road injuries                           | 1 (0 to 1)   | 1 (0 to 1)  | -9% (-14.2% to -3.3%)     |
| 4  | Mexico                           | Drowning                                        | 0 (0 to 0)   | 0 (0 to 0)  | -39.9% (-44.5% to -35.3%) |
| 5  | Mexico                           | Environmental heat and cold exposure            | 0 (0 to 0)   | 0 (0 to 0)  | -37.5% (-43.3% to -31.6%) |
| 6  | Mexico                           | Executions and police conflict                  | 0 (0 to 0)   | 0 (0 to 0)  | NA                        |
| 7  | Mexico                           | Exposure to forces of nature                    | 0 (0 to 0)   | 0 (0 to 0)  | NA                        |
| 8  | Mexico                           | Falls                                           | 10 (7 to 15) | 8 (6 to 12) | -16.8% (-18.6% to -14.8%) |
| 9  | Mexico                           | Fire, heat, and hot substances                  | 0 (0 to 0)   | 0 (0 to 0)  | -23% (-27.3% to -19%)     |
| 10 | Mexico                           | Foreign body in eyes                            | 0 (0 to 0)   | 0 (0 to 0)  | 0% (0% to 0%)             |
| 11 | Mexico                           | Foreign body in other body part                 | 0 (0 to 0)   | 0 (0 to 0)  | -0.3% (-2% to 1.1%)       |
| 12 | Mexico                           | Motor vehicle road injuries                     | 1 (1 to 2)   | 1 (1 to 2)  | -1.5% (-5.8% to 3.6%)     |
| 13 | Mexico                           | Motorcyclist road injuries                      | 0 (0 to 1)   | 0 (0 to 1)  | 3.7% (-3.2% to 12.3%)     |
| 14 | Mexico                           | Non-venomous animal contact                     | 0 (0 to 1)   | 0 (0 to 1)  | -21.3% (-24.6% to -18.2%) |
| 15 | Mexico                           | Other exposure to mechanical forces             | 1 (0 to 1)   | 1 (0 to 1)  | -20.9% (-24.5% to -16.8%) |
| 16 | Mexico                           | Other road injuries                             | 0 (0 to 0)   | 0 (0 to 0)  | -7.1% (-12.8% to -1.3%)   |
| 17 | Mexico                           | Other transport injuries                        | 0 (0 to 0)   | 0 (0 to 0)  | -9.5% (-12.2% to -6.9%)   |
| 18 | Mexico                           | Other unintentional injuries                    | 0 (0 to 1)   | 0 (0 to 1)  | -30.3% (-34.6% to -26.1%) |
| 19 | Mexico                           | Pedestrian road injuries                        | 1 (1 to 2)   | 1 (0 to 1)  | -37.5% (-41.9% to -33.7%) |
| 20 | Mexico                           | Physical violence by firearm                    | 0 (0 to 0)   | 0 (0 to 0)  | 99.5% (80.5% to 123.1%)   |
| 21 | Mexico                           | Physical violence by other means                | 0 (0 to 1)   | 0 (0 to 1)  | -3.8% (-12% to 3.2%)      |
| 22 | Mexico                           | Physical violence by sharp object               | 0 (0 to 0)   | 0 (0 to 0)  | 20.9% (11.7% to 29.9%)    |
| 23 | Mexico                           | Poisoning by carbon monoxide                    | 0 (0 to 0)   | 0 (0 to 0)  | 1.7% (-15.7% to 14.7%)    |
| 24 | Mexico                           | Poisoning by other means                        | 0 (0 to 0)   | 0 (0 to 0)  | -9.5% (-17.2% to -1.9%)   |
| 25 | Mexico                           | Pulmonary aspiration and foreign body in airway | 0 (0 to 0)   | 0 (0 to 0)  | -40.2% (-44.4% to -36%)   |
| 26 | Mexico                           | Self-harm by firearm                            | 0 (0 to 0)   | 0 (0 to 0)  | 12.8% (-2.1% to 25.5%)    |
| 27 | Mexico                           | Self-harm by other specified means              | 0 (0 to 0)   | 0 (0 to 0)  | 90.7% (76.5% to 115.5%)   |
| 28 | Mexico                           | Unintentional firearm injuries                  | 0 (0 to 0)   | 0 (0 to 0)  | -43.2% (-48.6% to -38.5%) |
| 29 | Mexico                           | Venomous animal contact                         | 0 (0 to 0)   | 0 (0 to 0)  | -27% (-31.4% to -23.4%)   |
| 30 | Micronesia (Federated States of) | Adverse effects of medical treatment            | 0 (0 to 0)   | 0 (0 to 0)  | 0% (0% to 0%)             |
| 31 | Micronesia (Federated States of) | Conflict and terrorism                          | 0 (0 to 0)   | 0 (0 to 0)  | NA                        |
| 32 | Micronesia (Federated States of) | Cyclist road injuries                           | 0 (0 to 0)   | 0 (0 to 0)  | -4% (-11.2% to 3.7%)      |
| 33 | Micronesia (Federated States of) | Drowning                                        | 0 (0 to 0)   | 0 (0 to 0)  | 8.7% (-2.1% to 20.2%)     |
| 34 | Micronesia (Federated States of) | Environmental heat and cold exposure            | 0 (0 to 0)   | 0 (0 to 0)  | -5.2% (-11.2% to 0.7%)    |
| 35 | Micronesia (Federated States of) | Executions and police conflict                  | 0 (0 to 0)   | 0 (0 to 0)  | NA                        |
| 36 | Micronesia (Federated States of) | Exposure to forces of nature                    | 0 (0 to 0)   | 0 (0 to 0)  | NA                        |
| 37 | Micronesia (Federated States of) | Falls                                           | 1 (1 to 1)   | 2 (1 to 2)  | 57.1% (50.6% to 62.8%)    |
| 38 | Micronesia (Federated States of) | Fire, heat, and hot substances                  | 0 (0 to 0)   | 0 (0 to 0)  | -2% (-8.1% to 4.5%)       |
| 39 | Micronesia (Federated States of) | Foreign body in eyes                            | 0 (0 to 0)   | 0 (0 to 0)  | 0% (0% to 0%)             |
| 40 | Micronesia (Federated States of) | Foreign body in other body part                 | 0 (0 to 0)   | 0 (0 to 0)  | -3% (-6% to 0.5%)         |
| 41 | Micronesia (Federated States of) | Motor vehicle road injuries                     | 1 (0 to 1)   | 1 (0 to 1)  | -7% (-13% to -0.9%)       |
| 42 | Micronesia (Federated States of) | Motorcyclist road injuries                      | 0 (0 to 0)   | 0 (0 to 0)  | 6.3% (-4.3% to 17.9%)     |
| 43 | Micronesia (Federated States of) | Non-venomous animal contact                     | 0 (0 to 0)   | 0 (0 to 0)  | -12.2% (-16.5% to -8.5%)  |
| 44 | Micronesia (Federated States of) | Other exposure to mechanical forces             | 0 (0 to 0)   | 0 (0 to 0)  | -12.4% (-18.3% to -5.5%)  |
| 45 |                                  |                                                 |              |             |                           |
| 46 |                                  |                                                 |              |             |                           |

|    |                                  |                                                 |              |               |                          |
|----|----------------------------------|-------------------------------------------------|--------------|---------------|--------------------------|
| 1  |                                  |                                                 |              |               |                          |
| 2  | Micronesia (Federated States of) | Other road injuries                             | 0 (0 to 0)   | 0 (0 to 0)    | -7.6% (-16.7% to 2.2%)   |
| 3  | Micronesia (Federated States of) | Other transport injuries                        | 0 (0 to 0)   | 0 (0 to 0)    | -5.4% (-10% to -0.4%)    |
| 4  | Micronesia (Federated States of) | Other unintentional injuries                    | 0 (0 to 0)   | 0 (0 to 0)    | -8.1% (-12.2% to -3.7%)  |
| 5  | Micronesia (Federated States of) | Pedestrian road injuries                        | 0 (0 to 0)   | 0 (0 to 0)    | -12.3% (-20% to -4.2%)   |
| 6  | Micronesia (Federated States of) | Physical violence by firearm                    | 0 (0 to 0)   | 0 (0 to 0)    | -0.5% (-12.5% to 13.4%)  |
| 7  | Micronesia (Federated States of) | Physical violence by other means                | 0 (0 to 1)   | 0 (0 to 1)    | 1.9% (-4.7% to 9%)       |
| 8  | Micronesia (Federated States of) | Physical violence by sharp object               | 0 (0 to 0)   | 0 (0 to 0)    | -13.9% (-22.3% to -4.8%) |
| 9  | Micronesia (Federated States of) | Poisoning by carbon monoxide                    | 0 (0 to 0)   | 0 (0 to 0)    | 14.3% (3.5% to 26.2%)    |
| 10 | Micronesia (Federated States of) | Poisoning by other means                        | 0 (0 to 0)   | 0 (0 to 0)    | -18% (-25.1% to -10.5%)  |
| 11 | Micronesia (Federated States of) | Pulmonary aspiration and foreign body in airway | 0 (0 to 0)   | 0 (0 to 0)    | -4.1% (-15.2% to 7.7%)   |
| 12 | Micronesia (Federated States of) | Self-harm by firearm                            | 0 (0 to 0)   | 0 (0 to 0)    | -4% (-17.9% to 11.1%)    |
| 13 | Micronesia (Federated States of) | Self-harm by other specified means              | 0 (0 to 1)   | 0 (0 to 1)    | 0% (-5.7% to 6.4%)       |
| 14 | Micronesia (Federated States of) | Unintentional firearm injuries                  | 0 (0 to 0)   | 0 (0 to 0)    | -25.5% (-32.3% to -20%)  |
| 15 | Monaco                           | Venomous animal contact                         | 0 (0 to 0)   | 0 (0 to 0)    | -7.7% (-13% to -1.3%)    |
| 16 | Monaco                           | Adverse effects of medical treatment            | 0 (0 to 0)   | 0 (0 to 0)    | 0% (0% to 0%)            |
| 17 | Monaco                           | Conflict and terrorism                          | 0 (0 to 0)   | 0 (0 to 0)    | NA                       |
| 18 | Monaco                           | Cyclist road injuries                           | 1 (0 to 1)   | 1 (0 to 1)    | -16.6% (-23.6% to -8.6%) |
| 19 | Monaco                           | Drowning                                        | 0 (0 to 0)   | 0 (0 to 0)    | 86.5% (64.5% to 110.6%)  |
| 20 | Monaco                           | Environmental heat and cold exposure            | 0 (0 to 0)   | 0 (0 to 0)    | 1.3% (-3% to 5.7%)       |
| 21 | Monaco                           | Executions and police conflict                  | 0 (0 to 0)   | 0 (0 to 0)    | NA                       |
| 22 | Monaco                           | Exposure to forces of nature                    | 0 (0 to 0)   | 0 (0 to 0)    | NA                       |
| 23 | Monaco                           | Falls                                           | 12 (8 to 18) | 15 (10 to 21) | 20.3% (16.4% to 24.5%)   |
| 24 | Monaco                           | Fire, heat, and hot substances                  | 0 (0 to 0)   | 0 (0 to 0)    | 1% (-3% to 4.7%)         |
| 25 | Monaco                           | Foreign body in eyes                            | 0 (0 to 0)   | 0 (0 to 0)    | 0% (0% to 0%)            |
| 26 | Monaco                           | Foreign body in other body part                 | 0 (0 to 1)   | 0 (0 to 1)    | 1.6% (-1.9% to 4.8%)     |
| 27 | Monaco                           | Motor vehicle road injuries                     | 1 (0 to 2)   | 1 (0 to 1)    | -13.4% (-20.4% to -5.9%) |
| 28 | Monaco                           | Motorcyclist road injuries                      | 1 (0 to 1)   | 0 (0 to 1)    | -3.9% (-13.1% to 6.8%)   |
| 29 | Monaco                           | Non-venomous animal contact                     | 0 (0 to 0)   | 0 (0 to 0)    | -8.9% (-11.9% to -4.7%)  |
| 30 | Monaco                           | Other exposure to mechanical forces             | 1 (0 to 1)   | 1 (0 to 1)    | 3.1% (-2% to 8.5%)       |
| 31 | Monaco                           | Other road injuries                             | 0 (0 to 0)   | 0 (0 to 0)    | -16.7% (-24.2% to -8.6%) |
| 32 | Monaco                           | Other transport injuries                        | 0 (0 to 0)   | 0 (0 to 1)    | 10.5% (6.4% to 15.8%)    |
| 33 | Monaco                           | Other unintentional injuries                    | 1 (0 to 1)   | 1 (0 to 1)    | 0.7% (-2.6% to 4.7%)     |
| 34 | Monaco                           | Pedestrian road injuries                        | 0 (0 to 1)   | 0 (0 to 1)    | -24% (-31.6% to -16.3%)  |
| 35 | Monaco                           | Physical violence by firearm                    | 0 (0 to 0)   | 0 (0 to 0)    | 27.5% (18.2% to 39.2%)   |
| 36 | Monaco                           | Physical violence by other means                | 0 (0 to 0)   | 0 (0 to 0)    | 4.6% (-0.4% to 9.8%)     |
| 37 | Monaco                           | Physical violence by sharp object               | 0 (0 to 0)   | 0 (0 to 0)    | 3.7% (-4.3% to 12.3%)    |
| 38 | Monaco                           | Poisoning by carbon monoxide                    | 0 (0 to 0)   | 0 (0 to 0)    | -1.3% (-9.2% to 7.1%)    |
| 39 | Monaco                           | Poisoning by other means                        | 0 (0 to 0)   | 0 (0 to 0)    | -27.9% (-33.4% to -23%)  |
| 40 | Monaco                           | Pulmonary aspiration and foreign body in airway | 0 (0 to 0)   | 0 (0 to 0)    | -13.9% (-20.1% to -6.6%) |
| 41 | Monaco                           | Self-harm by firearm                            | 0 (0 to 0)   | 0 (0 to 0)    | -1.8% (-10.1% to 8.5%)   |
| 42 | Monaco                           | Self-harm by other specified means              | 0 (0 to 0)   | 0 (0 to 0)    | -6.4% (-10.8% to -1%)    |
| 43 | Monaco                           | Unintentional firearm injuries                  | 0 (0 to 0)   | 0 (0 to 0)    | 2.5% (-4.6% to 9.9%)     |
| 44 | Monaco                           | Venomous animal contact                         | 0 (0 to 0)   | 0 (0 to 0)    | -10.2% (-15.7% to -3.8%) |
| 45 |                                  |                                                 |              |               |                          |
| 46 |                                  |                                                 |              |               |                          |

|    |            |                                                 |            |            |                           |
|----|------------|-------------------------------------------------|------------|------------|---------------------------|
| 1  |            |                                                 |            |            |                           |
| 2  | Mongolia   | Adverse effects of medical treatment            | 0 (0 to 0) | 0 (0 to 0) | 0% (0% to 0%)             |
| 3  | Mongolia   | Conflict and terrorism                          | 0 (0 to 0) | 0 (0 to 0) | NA                        |
| 4  | Mongolia   | Cyclist road injuries                           | 0 (0 to 0) | 0 (0 to 0) | 7.4% (-1.9% to 16.5%)     |
| 5  | Mongolia   | Drowning                                        | 0 (0 to 0) | 0 (0 to 0) | 41.5% (24.8% to 61.4%)    |
| 6  | Mongolia   | Environmental heat and cold exposure            | 0 (0 to 0) | 0 (0 to 0) | -34.1% (-37.4% to -30.6%) |
| 7  | Mongolia   | Executions and police conflict                  | 0 (0 to 0) | 0 (0 to 0) | NA                        |
| 8  | Mongolia   | Exposure to forces of nature                    | 0 (0 to 1) | 0 (0 to 0) | NA                        |
| 9  | Mongolia   | Falls                                           | 3 (2 to 4) | 4 (3 to 5) | 32.9% (27.9% to 38.1%)    |
| 10 | Mongolia   | Fire, heat, and hot substances                  | 0 (0 to 0) | 0 (0 to 0) | 10% (4.2% to 15.9%)       |
| 11 | Mongolia   | Foreign body in eyes                            | 0 (0 to 0) | 0 (0 to 0) | 0% (0% to 0%)             |
| 12 | Mongolia   | Foreign body in other body part                 | 0 (0 to 0) | 0 (0 to 0) | 1.5% (-2.6% to 6.2%)      |
| 13 | Mongolia   | Motor vehicle road injuries                     | 1 (0 to 1) | 1 (1 to 2) | 53.7% (42.6% to 65.6%)    |
| 14 | Mongolia   | Motorcyclist road injuries                      | 0 (0 to 0) | 0 (0 to 0) | 13.5% (1.6% to 28.3%)     |
| 15 | Mongolia   | Non-venomous animal contact                     | 0 (0 to 0) | 0 (0 to 0) | -20.8% (-24.9% to -16.6%) |
| 16 | Mongolia   | Other exposure to mechanical forces             | 1 (0 to 1) | 1 (0 to 1) | 4.5% (-2% to 11.4%)       |
| 17 | Mongolia   | Other road injuries                             | 0 (0 to 0) | 0 (0 to 0) | 26.5% (13.9% to 43.3%)    |
| 18 | Mongolia   | Other transport injuries                        | 0 (0 to 0) | 0 (0 to 0) | 5.1% (0.6% to 9.6%)       |
| 19 | Mongolia   | Other unintentional injuries                    | 0 (0 to 0) | 0 (0 to 0) | 7% (1.9% to 12.2%)        |
| 20 | Mongolia   | Pedestrian road injuries                        | 0 (0 to 0) | 0 (0 to 0) | 17.6% (6.5% to 30.7%)     |
| 21 | Mongolia   | Physical violence by firearm                    | 0 (0 to 0) | 0 (0 to 0) | 63% (40.3% to 89.1%)      |
| 22 | Mongolia   | Physical violence by other means                | 0 (0 to 1) | 0 (0 to 0) | -15.4% (-22% to -8%)      |
| 23 | Mongolia   | Physical violence by sharp object               | 0 (0 to 0) | 0 (0 to 0) | -19.6% (-28.9% to -10.2%) |
| 24 | Mongolia   | Poisoning by carbon monoxide                    | 0 (0 to 0) | 0 (0 to 0) | -9.8% (-24.1% to 8.2%)    |
| 25 | Mongolia   | Poisoning by other means                        | 0 (0 to 0) | 0 (0 to 0) | -57% (-63.6% to -49.6%)   |
| 26 | Mongolia   | Pulmonary aspiration and foreign body in airway | 0 (0 to 0) | 0 (0 to 0) | 1.3% (-4.9% to 9.3%)      |
| 27 | Mongolia   | Self-harm by firearm                            | 0 (0 to 0) | 0 (0 to 0) | 21.5% (0.4% to 43.5%)     |
| 28 | Mongolia   | Self-harm by other specified means              | 0 (0 to 1) | 0 (0 to 1) | 6.3% (-0.3% to 13.5%)     |
| 29 | Mongolia   | Unintentional firearm injuries                  | 0 (0 to 0) | 0 (0 to 0) | -7.7% (-16.6% to 1.6%)    |
| 30 | Mongolia   | Venomous animal contact                         | 0 (0 to 0) | 0 (0 to 0) | -19% (-23.8% to -14%)     |
| 31 | Montenegro | Adverse effects of medical treatment            | 0 (0 to 0) | 0 (0 to 0) | 0% (0% to 0%)             |
| 32 | Montenegro | Conflict and terrorism                          | 0 (0 to 0) | 0 (0 to 0) | NA                        |
| 33 | Montenegro | Cyclist road injuries                           | 1 (0 to 1) | 1 (0 to 1) | -4.4% (-12.3% to 3.2%)    |
| 34 | Montenegro | Drowning                                        | 0 (0 to 0) | 0 (0 to 0) | 50.3% (32.9% to 67.5%)    |
| 35 | Montenegro | Environmental heat and cold exposure            | 0 (0 to 0) | 0 (0 to 0) | -14.8% (-19.7% to -10.2%) |
| 36 | Montenegro | Executions and police conflict                  | 0 (0 to 0) | 0 (0 to 0) | NA                        |
| 37 | Montenegro | Exposure to forces of nature                    | 0 (0 to 0) | 0 (0 to 0) | NA                        |
| 38 | Montenegro | Falls                                           | 6 (4 to 8) | 6 (5 to 8) | 5.5% (1.2% to 10.5%)      |
| 39 | Montenegro | Fire, heat, and hot substances                  | 0 (0 to 0) | 0 (0 to 0) | -8.4% (-12.7% to -3.7%)   |
| 40 | Montenegro | Foreign body in eyes                            | 0 (0 to 0) | 0 (0 to 0) | 0% (0% to 0%)             |
| 41 | Montenegro | Foreign body in other body part                 | 0 (0 to 0) | 0 (0 to 0) | -0.7% (-4.3% to 3%)       |
| 42 | Montenegro | Motor vehicle road injuries                     | 1 (1 to 2) | 1 (1 to 2) | 8.5% (0.4% to 18%)        |
| 43 | Montenegro | Motorcyclist road injuries                      | 0 (0 to 0) | 0 (0 to 0) | -5.2% (-16.3% to 6.9%)    |
| 44 | Montenegro | Non-venomous animal contact                     | 0 (0 to 0) | 0 (0 to 0) | -5.8% (-9.6% to -2.1%)    |
| 45 |            |                                                 |            |            |                           |
| 46 |            |                                                 |            |            |                           |

|    |            |                                                 |            |            |                           |
|----|------------|-------------------------------------------------|------------|------------|---------------------------|
| 1  |            |                                                 |            |            |                           |
| 2  | Montenegro | Other exposure to mechanical forces             | 1 (1 to 3) | 1 (1 to 3) | -1.7% (-6.8% to 3%)       |
| 3  | Montenegro | Other road injuries                             | 0 (0 to 0) | 0 (0 to 0) | -0.6% (-10% to 8.5%)      |
| 4  | Montenegro | Other transport injuries                        | 0 (0 to 0) | 0 (0 to 0) | -6.5% (-11.4% to -1.8%)   |
| 5  | Montenegro | Other unintentional injuries                    | 0 (0 to 1) | 0 (0 to 0) | -15.8% (-21.8% to -9.5%)  |
| 6  | Montenegro | Pedestrian road injuries                        | 1 (0 to 1) | 0 (0 to 1) | -13.3% (-20.9% to -5.4%)  |
| 7  | Montenegro | Physical violence by firearm                    | 0 (0 to 0) | 0 (0 to 0) | 8.6% (-2.1% to 21.4%)     |
| 8  | Montenegro | Physical violence by other means                | 1 (0 to 1) | 0 (0 to 1) | -23% (-28.8% to -16.8%)   |
| 9  | Montenegro | Physical violence by sharp object               | 0 (0 to 0) | 0 (0 to 0) | -8.1% (-17% to 2.1%)      |
| 10 | Montenegro | Poisoning by carbon monoxide                    | 0 (0 to 0) | 0 (0 to 0) | 19.9% (11.4% to 29.7%)    |
| 11 | Montenegro | Poisoning by other means                        | 0 (0 to 0) | 0 (0 to 0) | 2.1% (-4.9% to 9.9%)      |
| 12 | Montenegro | Pulmonary aspiration and foreign body in airway | 0 (0 to 0) | 0 (0 to 0) | -17.7% (-26.8% to -9.2%)  |
| 13 | Montenegro | Self-harm by firearm                            | 0 (0 to 0) | 0 (0 to 0) | 14.2% (3.2% to 29.4%)     |
| 14 | Montenegro | Self-harm by other specified means              | 0 (0 to 1) | 0 (0 to 1) | -1.9% (-7% to 3%)         |
| 15 | Montenegro | Unintentional firearm injuries                  | 0 (0 to 0) | 0 (0 to 0) | -2.1% (-10.3% to 6.5%)    |
| 16 | Morocco    | Venomous animal contact                         | 0 (0 to 0) | 0 (0 to 0) | -8.5% (-13.8% to -3.4%)   |
| 17 | Morocco    | Adverse effects of medical treatment            | 0 (0 to 0) | 0 (0 to 0) | 0% (0% to 0%)             |
| 18 | Morocco    | Conflict and terrorism                          | 0 (0 to 0) | 0 (0 to 0) | NA                        |
| 19 | Morocco    | Cyclist road injuries                           | 0 (0 to 0) | 0 (0 to 0) | 9% (-1.4% to 19.3%)       |
| 20 | Morocco    | Drowning                                        | 0 (0 to 0) | 0 (0 to 0) | 54.4% (34.4% to 75.4%)    |
| 21 | Morocco    | Environmental heat and cold exposure            | 0 (0 to 0) | 0 (0 to 0) | -2.7% (-6.9% to 1.4%)     |
| 22 | Morocco    | Executions and police conflict                  | 0 (0 to 0) | 0 (0 to 0) | NA                        |
| 23 | Morocco    | Exposure to forces of nature                    | 0 (0 to 0) | 0 (0 to 0) | NA                        |
| 24 | Morocco    | Falls                                           | 2 (1 to 2) | 2 (2 to 3) | 36.6% (31.5% to 42.2%)    |
| 25 | Morocco    | Fire, heat, and hot substances                  | 0 (0 to 0) | 0 (0 to 0) | -24.4% (-29.8% to -18.5%) |
| 26 | Morocco    | Foreign body in eyes                            | 0 (0 to 0) | 0 (0 to 0) | 0% (0% to 0%)             |
| 27 | Morocco    | Foreign body in other body part                 | 0 (0 to 0) | 0 (0 to 0) | -0.7% (-4.3% to 3.5%)     |
| 28 | Morocco    | Motor vehicle road injuries                     | 1 (0 to 1) | 1 (0 to 1) | -9.5% (-16.6% to -1.3%)   |
| 29 | Morocco    | Motorcyclist road injuries                      | 0 (0 to 0) | 0 (0 to 0) | -5.9% (-16.8% to 6.2%)    |
| 30 | Morocco    | Non-venomous animal contact                     | 0 (0 to 0) | 0 (0 to 0) | -10.9% (-14.6% to -6.6%)  |
| 31 | Morocco    | Other exposure to mechanical forces             | 0 (0 to 1) | 0 (0 to 1) | -5.4% (-11.3% to 0.9%)    |
| 32 | Morocco    | Other road injuries                             | 0 (0 to 0) | 0 (0 to 0) | 14.1% (3.5% to 26.2%)     |
| 33 | Morocco    | Other transport injuries                        | 0 (0 to 0) | 0 (0 to 0) | -5.2% (-9.7% to -0.3%)    |
| 34 | Morocco    | Other unintentional injuries                    | 0 (0 to 0) | 0 (0 to 0) | -21% (-25.1% to -17%)     |
| 35 | Morocco    | Pedestrian road injuries                        | 0 (0 to 1) | 0 (0 to 0) | -30.2% (-37.4% to -23%)   |
| 36 | Morocco    | Physical violence by firearm                    | 0 (0 to 0) | 0 (0 to 0) | 129.8% (98.5% to 173.6%)  |
| 37 | Morocco    | Physical violence by other means                | 0 (0 to 0) | 0 (0 to 0) | 1.2% (-7.7% to 9.9%)      |
| 38 | Morocco    | Physical violence by sharp object               | 0 (0 to 0) | 0 (0 to 0) | 2.7% (-8.2% to 13.8%)     |
| 39 | Morocco    | Poisoning by carbon monoxide                    | 0 (0 to 0) | 0 (0 to 0) | 37.9% (21.1% to 54.8%)    |
| 40 | Morocco    | Poisoning by other means                        | 0 (0 to 0) | 0 (0 to 0) | -22.5% (-30% to -14.5%)   |
| 41 | Morocco    | Pulmonary aspiration and foreign body in airway | 0 (0 to 0) | 0 (0 to 0) | -20.1% (-29% to -12.3%)   |
| 42 | Morocco    | Self-harm by firearm                            | 0 (0 to 0) | 0 (0 to 0) | 33% (19.6% to 49%)        |
| 43 | Morocco    | Self-harm by other specified means              | 0 (0 to 0) | 0 (0 to 0) | 2.2% (-2.8% to 7.7%)      |
| 44 | Morocco    | Unintentional firearm injuries                  | 0 (0 to 0) | 0 (0 to 0) | -16.4% (-23.6% to -10.1%) |
| 45 |            |                                                 |            |            |                           |
| 46 |            |                                                 |            |            |                           |



|    |            |                                                 |             |            |                           |
|----|------------|-------------------------------------------------|-------------|------------|---------------------------|
| 1  |            |                                                 |             |            |                           |
| 2  | Morocco    | Venomous animal contact                         | 0 (0 to 0)  | 0 (0 to 0) | -8.5% (-14.4% to -1.8%)   |
| 3  | Mozambique | Adverse effects of medical treatment            | 0 (0 to 0)  | 0 (0 to 0) | 0% (0% to 0%)             |
| 4  | Mozambique | Conflict and terrorism                          | 5 (1 to 16) | 0 (0 to 0) | NA                        |
| 5  | Mozambique | Cyclist road injuries                           | 2 (1 to 3)  | 2 (1 to 4) | 24.7% (15.7% to 34.7%)    |
| 6  | Mozambique | Drowning                                        | 0 (0 to 0)  | 0 (0 to 0) | -10.2% (-17% to -3.8%)    |
| 7  | Mozambique | Environmental heat and cold exposure            | 0 (0 to 0)  | 0 (0 to 0) | 0.1% (-6% to 7.2%)        |
| 8  | Mozambique | Executions and police conflict                  | 0 (0 to 0)  | 0 (0 to 0) | NA                        |
| 9  | Mozambique | Exposure to forces of nature                    | 0 (0 to 0)  | 1 (0 to 2) | NA                        |
| 10 | Mozambique | Falls                                           | 3 (2 to 5)  | 5 (3 to 7) | 34.1% (29.1% to 39.4%)    |
| 11 | Mozambique | Fire, heat, and hot substances                  | 0 (0 to 0)  | 0 (0 to 0) | -4.4% (-9.9% to 0.6%)     |
| 12 | Mozambique | Foreign body in eyes                            | 0 (0 to 0)  | 0 (0 to 0) | 0% (0% to 0%)             |
| 13 | Mozambique | Foreign body in other body part                 | 1 (0 to 1)  | 1 (0 to 1) | -6% (-9.6% to -1.7%)      |
| 14 | Mozambique | Motor vehicle road injuries                     | 1 (0 to 2)  | 1 (1 to 3) | 26.9% (15.1% to 39.4%)    |
| 15 | Mozambique | Motorcyclist road injuries                      | 1 (0 to 1)  | 1 (0 to 2) | 24.9% (15.4% to 36.6%)    |
| 16 | Mozambique | Non-venomous animal contact                     | 1 (0 to 1)  | 0 (0 to 1) | -16.7% (-21% to -12%)     |
| 17 | Mozambique | Other exposure to mechanical forces             | 0 (0 to 0)  | 0 (0 to 0) | -0.5% (-6.3% to 5.4%)     |
| 18 | Mozambique | Other road injuries                             | 0 (0 to 0)  | 0 (0 to 0) | 8.9% (0.8% to 18.6%)      |
| 19 | Mozambique | Other transport injuries                        | 0 (0 to 1)  | 0 (0 to 1) | -1.2% (-6.3% to 4.7%)     |
| 20 | Mozambique | Other unintentional injuries                    | 0 (0 to 0)  | 0 (0 to 0) | -9.7% (-15% to -4.5%)     |
| 21 | Mozambique | Pedestrian road injuries                        | 3 (1 to 6)  | 3 (2 to 6) | 13.9% (6.7% to 21.7%)     |
| 22 | Mozambique | Physical violence by firearm                    | 0 (0 to 0)  | 0 (0 to 0) | 67.9% (53.1% to 87%)      |
| 23 | Mozambique | Physical violence by other means                | 0 (0 to 0)  | 0 (0 to 0) | 48.6% (39.6% to 59%)      |
| 24 | Mozambique | Physical violence by sharp object               | 0 (0 to 0)  | 0 (0 to 0) | 42% (30.2% to 54.8%)      |
| 25 | Mozambique | Poisoning by carbon monoxide                    | 0 (0 to 0)  | 0 (0 to 0) | 23.9% (9.2% to 39.7%)     |
| 26 | Mozambique | Poisoning by other means                        | 0 (0 to 0)  | 0 (0 to 0) | -16.2% (-23.6% to -8%)    |
| 27 | Mozambique | Pulmonary aspiration and foreign body in airway | 0 (0 to 0)  | 0 (0 to 0) | -14.8% (-25.6% to -3.2%)  |
| 28 | Mozambique | Self-harm by firearm                            | 0 (0 to 0)  | 0 (0 to 0) | 83.9% (62.7% to 117.2%)   |
| 29 | Mozambique | Self-harm by other specified means              | 0 (0 to 0)  | 0 (0 to 0) | 49.6% (41.3% to 59.7%)    |
| 30 | Mozambique | Unintentional firearm injuries                  | 0 (0 to 0)  | 0 (0 to 0) | -17.4% (-25.6% to -10.1%) |
| 31 | Mozambique | Venomous animal contact                         | 0 (0 to 0)  | 0 (0 to 0) | -18.5% (-25.3% to -11.2%) |
| 32 | Myanmar    | Adverse effects of medical treatment            | 0 (0 to 0)  | 0 (0 to 0) | 0% (0% to 0%)             |
| 33 | Myanmar    | Conflict and terrorism                          | 1 (0 to 2)  | 1 (0 to 2) | NA                        |
| 34 | Myanmar    | Cyclist road injuries                           | 0 (0 to 0)  | 0 (0 to 0) | -21.7% (-28.4% to -14.2%) |
| 35 | Myanmar    | Drowning                                        | 0 (0 to 0)  | 0 (0 to 0) | -28.7% (-35.4% to -20.8%) |
| 36 | Myanmar    | Environmental heat and cold exposure            | 0 (0 to 0)  | 0 (0 to 0) | 4.6% (-0.9% to 9.6%)      |
| 37 | Myanmar    | Executions and police conflict                  | 0 (0 to 0)  | 0 (0 to 0) | NA                        |
| 38 | Myanmar    | Exposure to forces of nature                    | 0 (0 to 0)  | 0 (0 to 0) | NA                        |
| 39 | Myanmar    | Falls                                           | 2 (1 to 3)  | 3 (2 to 4) | 35.4% (30.2% to 40.5%)    |
| 40 | Myanmar    | Fire, heat, and hot substances                  | 0 (0 to 0)  | 0 (0 to 0) | -3.7% (-11.2% to 1.9%)    |
| 41 | Myanmar    | Foreign body in eyes                            | 0 (0 to 0)  | 0 (0 to 0) | 0% (0% to 0%)             |
| 42 | Myanmar    | Foreign body in other body part                 | 0 (0 to 0)  | 0 (0 to 0) | -5.2% (-8.9% to -1.8%)    |
| 43 | Myanmar    | Motor vehicle road injuries                     | 0 (0 to 1)  | 0 (0 to 0) | -30% (-36.2% to -23.4%)   |
| 44 | Myanmar    | Motorcyclist road injuries                      | 1 (0 to 1)  | 0 (0 to 1) | -19.4% (-26.4% to -11.4%) |
| 45 |            |                                                 |             |            |                           |
| 46 |            |                                                 |             |            |                           |

|    |         |                                                 |            |            |                           |
|----|---------|-------------------------------------------------|------------|------------|---------------------------|
| 1  |         |                                                 |            |            |                           |
| 2  | Myanmar | Non-venomous animal contact                     | 0 (0 to 0) | 0 (0 to 0) | -44.3% (-47.5% to -41%)   |
| 3  | Myanmar | Other exposure to mechanical forces             | 0 (0 to 0) | 0 (0 to 0) | -12.1% (-18.5% to -5.1%)  |
| 4  | Myanmar | Other road injuries                             | 0 (0 to 0) | 0 (0 to 0) | -16.2% (-24.6% to -6.8%)  |
| 5  | Myanmar | Other transport injuries                        | 0 (0 to 0) | 0 (0 to 0) | -23.5% (-30% to -17.5%)   |
| 6  | Myanmar | Other unintentional injuries                    | 0 (0 to 0) | 0 (0 to 0) | -26.4% (-31.5% to -21.2%) |
| 7  | Myanmar | Pedestrian road injuries                        | 0 (0 to 0) | 0 (0 to 0) | -45.7% (-50.7% to -40.2%) |
| 8  | Myanmar | Physical violence by firearm                    | 0 (0 to 0) | 0 (0 to 0) | -10.7% (-27% to 6.3%)     |
| 9  | Myanmar | Physical violence by other means                | 0 (0 to 0) | 0 (0 to 0) | -31.7% (-39.6% to -23.6%) |
| 10 | Myanmar | Physical violence by sharp object               | 0 (0 to 0) | 0 (0 to 0) | -45.9% (-53.5% to -38.4%) |
| 11 | Myanmar | Poisoning by carbon monoxide                    | 0 (0 to 0) | 0 (0 to 0) | 5.5% (-8.1% to 22.2%)     |
| 12 | Myanmar | Poisoning by other means                        | 0 (0 to 0) | 0 (0 to 0) | -40.6% (-46.6% to -35.2%) |
| 13 | Myanmar | Pulmonary aspiration and foreign body in airway | 0 (0 to 0) | 0 (0 to 0) | -39.9% (-46.2% to -33.6%) |
| 14 | Myanmar | Self-harm by firearm                            | 0 (0 to 0) | 0 (0 to 0) | -2.5% (-19.3% to 15.9%)   |
| 15 | Myanmar | Self-harm by other specified means              | 0 (0 to 0) | 0 (0 to 0) | -28.7% (-32.9% to -24.3%) |
| 16 | Myanmar | Unintentional firearm injuries                  | 0 (0 to 0) | 0 (0 to 0) | -27.6% (-36.3% to -20.7%) |
| 17 | Namibia | Venomous animal contact                         | 0 (0 to 0) | 0 (0 to 0) | -57.9% (-62.7% to -53.1%) |
| 18 | Namibia | Adverse effects of medical treatment            | 0 (0 to 0) | 0 (0 to 0) | 0% (0% to 0%)             |
| 19 | Namibia | Conflict and terrorism                          | 0 (0 to 0) | 0 (0 to 0) | NA                        |
| 20 | Namibia | Cyclist road injuries                           | 0 (0 to 1) | 1 (0 to 1) | 40.5% (30.6% to 53.3%)    |
| 21 | Namibia | Drowning                                        | 0 (0 to 0) | 0 (0 to 0) | 14.9% (3.5% to 27.6%)     |
| 22 | Namibia | Environmental heat and cold exposure            | 0 (0 to 0) | 0 (0 to 0) | -14.2% (-19.2% to -9.3%)  |
| 23 | Namibia | Executions and police conflict                  | 0 (0 to 0) | 0 (0 to 0) | NA                        |
| 24 | Namibia | Exposure to forces of nature                    | 0 (0 to 0) | 0 (0 to 0) | NA                        |
| 25 | Namibia | Falls                                           | 2 (2 to 3) | 3 (2 to 4) | 27.5% (23.2% to 31.9%)    |
| 26 | Namibia | Fire, heat, and hot substances                  | 0 (0 to 0) | 0 (0 to 0) | -15.9% (-21.1% to -10.3%) |
| 27 | Namibia | Foreign body in eyes                            | 0 (0 to 0) | 0 (0 to 0) | 0% (0% to 0%)             |
| 28 | Namibia | Foreign body in other body part                 | 1 (1 to 1) | 1 (0 to 1) | -3.2% (-6.7% to 0.9%)     |
| 29 | Namibia | Motor vehicle road injuries                     | 1 (1 to 3) | 1 (1 to 3) | 7.1% (-1% to 16.4%)       |
| 30 | Namibia | Motorcyclist road injuries                      | 0 (0 to 1) | 0 (0 to 1) | 22% (10.1% to 35%)        |
| 31 | Namibia | Non-venomous animal contact                     | 0 (0 to 0) | 0 (0 to 0) | -22.4% (-26.8% to -18%)   |
| 32 | Namibia | Other exposure to mechanical forces             | 0 (0 to 1) | 0 (0 to 0) | -19.5% (-24.1% to -14.2%) |
| 33 | Namibia | Other road injuries                             | 0 (0 to 0) | 0 (0 to 0) | 34% (20.9% to 49.7%)      |
| 34 | Namibia | Other transport injuries                        | 0 (0 to 1) | 0 (0 to 1) | -6% (-11% to -1.2%)       |
| 35 | Namibia | Other unintentional injuries                    | 0 (0 to 0) | 0 (0 to 0) | -16.4% (-21.1% to -11.7%) |
| 36 | Namibia | Pedestrian road injuries                        | 2 (1 to 3) | 2 (1 to 3) | -2.5% (-9.2% to 4.3%)     |
| 37 | Namibia | Physical violence by firearm                    | 0 (0 to 0) | 0 (0 to 0) | 10.9% (-4.8% to 30.5%)    |
| 38 | Namibia | Physical violence by other means                | 0 (0 to 1) | 0 (0 to 1) | 0.1% (-6.6% to 7.1%)      |
| 39 | Namibia | Physical violence by sharp object               | 0 (0 to 0) | 0 (0 to 0) | 4.1% (-4.6% to 14.2%)     |
| 40 | Namibia | Poisoning by carbon monoxide                    | 0 (0 to 0) | 0 (0 to 0) | 25.3% (11.4% to 40.2%)    |
| 41 | Namibia | Poisoning by other means                        | 0 (0 to 0) | 0 (0 to 0) | -12.1% (-20.3% to -4.6%)  |
| 42 | Namibia | Pulmonary aspiration and foreign body in airway | 0 (0 to 0) | 0 (0 to 0) | -5.8% (-12.8% to 1.7%)    |
| 43 | Namibia | Self-harm by firearm                            | 0 (0 to 0) | 0 (0 to 0) | 63.2% (42.8% to 91.4%)    |
| 44 | Namibia | Self-harm by other specified means              | 0 (0 to 0) | 0 (0 to 0) | 25.4% (17.7% to 34%)      |
| 45 |         |                                                 |            |            |                           |
| 46 |         |                                                 |            |            |                           |

|    |         |                                                 |            |            |                           |
|----|---------|-------------------------------------------------|------------|------------|---------------------------|
| 1  |         |                                                 |            |            |                           |
| 2  | Namibia | Unintentional firearm injuries                  | 0 (0 to 0) | 0 (0 to 0) | -17.3% (-25.7% to -7.8%)  |
| 3  | Namibia | Venomous animal contact                         | 0 (0 to 0) | 0 (0 to 0) | -26.2% (-33.9% to -17.3%) |
| 4  | Nauru   | Adverse effects of medical treatment            | 0 (0 to 0) | 0 (0 to 0) | 0% (0% to 0%)             |
| 5  | Nauru   | Conflict and terrorism                          | 0 (0 to 0) | 0 (0 to 0) | NA                        |
| 6  | Nauru   | Cyclist road injuries                           | 0 (0 to 1) | 0 (0 to 1) | 2.3% (-3.7% to 9.8%)      |
| 7  | Nauru   | Drowning                                        | 0 (0 to 0) | 0 (0 to 0) | 35.7% (24.4% to 46.8%)    |
| 8  | Nauru   | Environmental heat and cold exposure            | 0 (0 to 0) | 0 (0 to 0) | -3.9% (-8.4% to 0.1%)     |
| 9  | Nauru   | Executions and police conflict                  | 0 (0 to 0) | 0 (0 to 0) | NA                        |
| 10 | Nauru   | Exposure to forces of nature                    | 0 (0 to 0) | 0 (0 to 0) | NA                        |
| 11 | Nauru   | Falls                                           | 3 (2 to 5) | 5 (3 to 7) | 46.7% (41.7% to 51.7%)    |
| 12 | Nauru   | Fire, heat, and hot substances                  | 0 (0 to 0) | 0 (0 to 0) | -2.9% (-7.3% to 1.9%)     |
| 13 | Nauru   | Foreign body in eyes                            | 0 (0 to 0) | 0 (0 to 0) | 0% (0% to 0%)             |
| 14 | Nauru   | Foreign body in other body part                 | 0 (0 to 0) | 0 (0 to 0) | -3% (-6.4% to 1.2%)       |
| 15 | Nauru   | Motor vehicle road injuries                     | 1 (1 to 2) | 1 (1 to 2) | -11.1% (-17.1% to -5.5%)  |
| 16 | Nauru   | Motorcyclist road injuries                      | 1 (0 to 2) | 1 (0 to 2) | -2.4% (-9.4% to 5.8%)     |
| 17 | Nauru   | Non-venomous animal contact                     | 0 (0 to 0) | 0 (0 to 0) | 3.4% (-0.8% to 7.8%)      |
| 18 | Nauru   | Other exposure to mechanical forces             | 0 (0 to 0) | 0 (0 to 0) | -15.6% (-20.1% to -11%)   |
| 19 | Nauru   | Other road injuries                             | 0 (0 to 0) | 0 (0 to 0) | -2.9% (-10.5% to 5.8%)    |
| 20 | Nauru   | Other transport injuries                        | 0 (0 to 1) | 0 (0 to 1) | -4.6% (-8.3% to -0.8%)    |
| 21 | Nauru   | Other unintentional injuries                    | 0 (0 to 0) | 0 (0 to 0) | 2.2% (-2% to 7%)          |
| 22 | Nauru   | Pedestrian road injuries                        | 1 (0 to 1) | 1 (0 to 1) | 0.8% (-6.5% to 9%)        |
| 23 | Nauru   | Physical violence by firearm                    | 0 (0 to 0) | 0 (0 to 0) | 0.3% (-11.5% to 11.5%)    |
| 24 | Nauru   | Physical violence by other means                | 1 (0 to 1) | 1 (0 to 1) | -1.5% (-7.1% to 4.1%)     |
| 25 | Nauru   | Physical violence by sharp object               | 0 (0 to 0) | 0 (0 to 0) | -15.2% (-23.7% to -6.5%)  |
| 26 | Nauru   | Poisoning by carbon monoxide                    | 0 (0 to 0) | 0 (0 to 0) | 9.3% (-0.5% to 19.2%)     |
| 27 | Nauru   | Poisoning by other means                        | 0 (0 to 0) | 0 (0 to 0) | -16.3% (-22.9% to -9.6%)  |
| 28 | Nauru   | Pulmonary aspiration and foreign body in airway | 0 (0 to 0) | 0 (0 to 0) | 7.5% (-2.7% to 17.6%)     |
| 29 | Nauru   | Self-harm by firearm                            | 0 (0 to 0) | 0 (0 to 0) | -5.1% (-19.8% to 8.4%)    |
| 30 | Nauru   | Self-harm by other specified means              | 0 (0 to 0) | 0 (0 to 0) | 0.2% (-5.6% to 7%)        |
| 31 | Nauru   | Unintentional firearm injuries                  | 0 (0 to 0) | 0 (0 to 0) | -15.4% (-23.2% to -9%)    |
| 32 | Nauru   | Venomous animal contact                         | 0 (0 to 0) | 0 (0 to 0) | 5% (-2.2% to 12.9%)       |
| 33 | Nepal   | Adverse effects of medical treatment            | 0 (0 to 0) | 0 (0 to 0) | 0% (0% to 0%)             |
| 34 | Nepal   | Conflict and terrorism                          | 0 (0 to 0) | 0 (0 to 0) | NA                        |
| 35 | Nepal   | Cyclist road injuries                           | 1 (0 to 1) | 1 (0 to 1) | -2.2% (-9.5% to 4.7%)     |
| 36 | Nepal   | Drowning                                        | 0 (0 to 0) | 0 (0 to 0) | -4.6% (-14.4% to 6.5%)    |
| 37 | Nepal   | Environmental heat and cold exposure            | 0 (0 to 0) | 0 (0 to 0) | -13.2% (-18.8% to -7.9%)  |
| 38 | Nepal   | Executions and police conflict                  | 0 (0 to 0) | 0 (0 to 0) | NA                        |
| 39 | Nepal   | Exposure to forces of nature                    | 0 (0 to 0) | 0 (0 to 0) | NA                        |
| 40 | Nepal   | Falls                                           | 3 (2 to 4) | 3 (3 to 5) | 24.2% (19.7% to 28.5%)    |
| 41 | Nepal   | Fire, heat, and hot substances                  | 0 (0 to 0) | 0 (0 to 0) | 11.5% (4.5% to 19.6%)     |
| 42 | Nepal   | Foreign body in eyes                            | 0 (0 to 0) | 0 (0 to 0) | 0% (0% to 0%)             |
| 43 | Nepal   | Foreign body in other body part                 | 0 (0 to 0) | 0 (0 to 0) | -6.5% (-9.9% to -2.9%)    |
| 44 | Nepal   | Motor vehicle road injuries                     | 0 (0 to 1) | 0 (0 to 1) | 15.6% (6.1% to 25.2%)     |

|    |             |                                                 |            |            |                           |
|----|-------------|-------------------------------------------------|------------|------------|---------------------------|
| 1  |             |                                                 |            |            |                           |
| 2  | Nepal       | Motorcyclist road injuries                      | 0 (0 to 1) | 0 (0 to 1) | 18% (7.6% to 28.8%)       |
| 3  | Nepal       | Non-venomous animal contact                     | 0 (0 to 1) | 0 (0 to 1) | -15.4% (-20.4% to -10.6%) |
| 4  | Nepal       | Other exposure to mechanical forces             | 0 (0 to 0) | 0 (0 to 0) | 4.3% (-2.2% to 10.7%)     |
| 5  | Nepal       | Other road injuries                             | 0 (0 to 0) | 0 (0 to 0) | 2.8% (-5.2% to 11.5%)     |
| 6  | Nepal       | Other transport injuries                        | 0 (0 to 0) | 0 (0 to 0) | 0.1% (-4.8% to 5.1%)      |
| 7  | Nepal       | Other unintentional injuries                    | 0 (0 to 0) | 0 (0 to 0) | -18.4% (-22.5% to -14%)   |
| 8  | Nepal       | Pedestrian road injuries                        | 0 (0 to 0) | 0 (0 to 0) | -2.2% (-10.4% to 5.8%)    |
| 9  | Nepal       | Physical violence by firearm                    | 0 (0 to 0) | 0 (0 to 0) | 58.5% (35.8% to 86.8%)    |
| 10 | Nepal       | Physical violence by other means                | 0 (0 to 1) | 0 (0 to 1) | 21.4% (14.6% to 28.3%)    |
| 11 | Nepal       | Physical violence by sharp object               | 0 (0 to 0) | 0 (0 to 0) | 8.5% (-0.8% to 18.4%)     |
| 12 | Nepal       | Poisoning by carbon monoxide                    | 0 (0 to 0) | 0 (0 to 0) | -5.7% (-17.8% to 6.9%)    |
| 13 | Nepal       | Poisoning by other means                        | 0 (0 to 0) | 0 (0 to 0) | -31.2% (-38.3% to -23.2%) |
| 14 | Nepal       | Pulmonary aspiration and foreign body in airway | 0 (0 to 0) | 0 (0 to 0) | -24.5% (-31.1% to -17.6%) |
| 15 | Nepal       | Self-harm by firearm                            | 0 (0 to 0) | 0 (0 to 0) | 25.9% (9.2% to 44%)       |
| 16 | Nepal       | Self-harm by other specified means              | 0 (0 to 0) | 0 (0 to 0) | 2.7% (-3.7% to 9.1%)      |
| 17 | Nepal       | Unintentional firearm injuries                  | 0 (0 to 0) | 0 (0 to 0) | -8.8% (-16.2% to -2.3%)   |
| 18 | Nepal       | Venomous animal contact                         | 0 (0 to 0) | 0 (0 to 0) | -7.5% (-17.9% to 1.5%)    |
| 19 | Netherlands | Adverse effects of medical treatment            | 0 (0 to 0) | 0 (0 to 0) | 0% (0% to 0%)             |
| 20 | Netherlands | Conflict and terrorism                          | 0 (0 to 0) | 0 (0 to 0) | NA                        |
| 21 | Netherlands | Cyclist road injuries                           | 0 (0 to 1) | 0 (0 to 0) | -45.8% (-53.8% to -37.3%) |
| 22 | Netherlands | Drowning                                        | 0 (0 to 0) | 0 (0 to 0) | 58% (43% to 75.8%)        |
| 23 | Netherlands | Environmental heat and cold exposure            | 0 (0 to 0) | 0 (0 to 0) | -5.2% (-10.1% to -0.3%)   |
| 24 | Netherlands | Executions and police conflict                  | 0 (0 to 0) | 0 (0 to 0) | NA                        |
| 25 | Netherlands | Exposure to forces of nature                    | 0 (0 to 0) | 0 (0 to 0) | NA                        |
| 26 | Netherlands | Falls                                           | 5 (3 to 6) | 7 (5 to 9) | 45.5% (38.9% to 53.2%)    |
| 27 | Netherlands | Fire, heat, and hot substances                  | 0 (0 to 0) | 0 (0 to 0) | -2.4% (-7.1% to 2.3%)     |
| 28 | Netherlands | Foreign body in eyes                            | 0 (0 to 0) | 0 (0 to 0) | 0% (0% to 0%)             |
| 29 | Netherlands | Foreign body in other body part                 | 0 (0 to 0) | 0 (0 to 0) | 1.1% (-2.1% to 5.9%)      |
| 30 | Netherlands | Motor vehicle road injuries                     | 0 (0 to 1) | 0 (0 to 0) | -33.8% (-43.6% to -22.8%) |
| 31 | Netherlands | Motorcyclist road injuries                      | 0 (0 to 0) | 0 (0 to 0) | -34.6% (-47.1% to -19.8%) |
| 32 | Netherlands | Non-venomous animal contact                     | 0 (0 to 0) | 0 (0 to 0) | -11.4% (-14.7% to -7.1%)  |
| 33 | Netherlands | Other exposure to mechanical forces             | 0 (0 to 1) | 0 (0 to 1) | -2.5% (-8.5% to 2.9%)     |
| 34 | Netherlands | Other road injuries                             | 0 (0 to 0) | 0 (0 to 0) | -6% (-19.5% to 10.4%)     |
| 35 | Netherlands | Other transport injuries                        | 0 (0 to 0) | 0 (0 to 0) | 5.8% (1.3% to 10.3%)      |
| 36 | Netherlands | Other unintentional injuries                    | 0 (0 to 0) | 0 (0 to 0) | -5% (-9.7% to -0.2%)      |
| 37 | Netherlands | Pedestrian road injuries                        | 0 (0 to 0) | 0 (0 to 0) | -5.8% (-20.3% to 11.7%)   |
| 38 | Netherlands | Physical violence by firearm                    | 0 (0 to 0) | 0 (0 to 0) | 12.4% (2.5% to 24.8%)     |
| 39 | Netherlands | Physical violence by other means                | 0 (0 to 0) | 0 (0 to 0) | -12.2% (-20% to -4.3%)    |
| 40 | Netherlands | Physical violence by sharp object               | 0 (0 to 0) | 0 (0 to 0) | -27.6% (-36.9% to -19.6%) |
| 41 | Netherlands | Poisoning by carbon monoxide                    | 0 (0 to 0) | 0 (0 to 0) | 12.2% (3.7% to 21%)       |
| 42 | Netherlands | Poisoning by other means                        | 0 (0 to 0) | 0 (0 to 0) | -5.1% (-11.1% to 1.6%)    |
| 43 | Netherlands | Pulmonary aspiration and foreign body in airway | 0 (0 to 0) | 0 (0 to 0) | -8.3% (-15.6% to -2.3%)   |
| 44 | Netherlands | Self-harm by firearm                            | 0 (0 to 0) | 0 (0 to 0) | 13.1% (0.8% to 29.1%)     |
| 45 |             |                                                 |            |            |                           |
| 46 |             |                                                 |            |            |                           |

|    |             |                                                 |             |             |                           |
|----|-------------|-------------------------------------------------|-------------|-------------|---------------------------|
| 1  |             |                                                 |             |             |                           |
| 2  | Netherlands | Self-harm by other specified means              | 0 (0 to 1)  | 0 (0 to 1)  | -9.4% (-13.3% to -4.4%)   |
| 3  | Netherlands | Unintentional firearm injuries                  | 0 (0 to 0)  | 0 (0 to 0)  | 5.1% (-2.7% to 13.5%)     |
| 4  | Netherlands | Venomous animal contact                         | 0 (0 to 0)  | 0 (0 to 0)  | -10.9% (-16.7% to -4.9%)  |
| 5  | New Zealand | Adverse effects of medical treatment            | 0 (0 to 0)  | 0 (0 to 0)  | 0% (0% to 0%)             |
| 6  | New Zealand | Conflict and terrorism                          | 0 (0 to 0)  | 0 (0 to 0)  | NA                        |
| 7  | New Zealand | Cyclist road injuries                           | 0 (0 to 0)  | 0 (0 to 0)  | -21.5% (-32.1% to -9.6%)  |
| 8  | New Zealand | Drowning                                        | 0 (0 to 0)  | 0 (0 to 0)  | -33.5% (-39.1% to -27.7%) |
| 9  | New Zealand | Environmental heat and cold exposure            | 0 (0 to 0)  | 0 (0 to 0)  | -35.9% (-43.3% to -27.5%) |
| 10 | New Zealand | Executions and police conflict                  | 0 (0 to 0)  | 0 (0 to 0)  | NA                        |
| 11 | New Zealand | Exposure to forces of nature                    | 0 (0 to 0)  | 0 (0 to 0)  | NA                        |
| 12 | New Zealand | Falls                                           | 7 (5 to 10) | 9 (6 to 12) | 19.9% (13.3% to 28%)      |
| 13 | New Zealand | Fire, heat, and hot substances                  | 0 (0 to 0)  | 0 (0 to 0)  | -12% (-17.3% to -4.7%)    |
| 14 | New Zealand | Foreign body in eyes                            | 0 (0 to 0)  | 0 (0 to 0)  | 0% (0% to 0%)             |
| 15 | New Zealand | Foreign body in other body part                 | 1 (1 to 1)  | 1 (1 to 1)  | -4.8% (-11.1% to 2.8%)    |
| 16 | New Zealand | Motor vehicle road injuries                     | 1 (0 to 2)  | 1 (0 to 1)  | -11.5% (-21.3% to 1.1%)   |
| 17 | New Zealand | Motorcyclist road injuries                      | 0 (0 to 0)  | 0 (0 to 0)  | -27.7% (-40.6% to -13%)   |
| 18 | New Zealand | Non-venomous animal contact                     | 0 (0 to 1)  | 0 (0 to 1)  | -14% (-25.8% to -0.5%)    |
| 19 | New Zealand | Other exposure to mechanical forces             | 2 (1 to 5)  | 2 (1 to 4)  | -8.7% (-14.9% to -0.9%)   |
| 20 | New Zealand | Other road injuries                             | 0 (0 to 0)  | 0 (0 to 0)  | -34.3% (-43.1% to -23.2%) |
| 21 | New Zealand | Other transport injuries                        | 0 (0 to 0)  | 0 (0 to 0)  | -16.7% (-28% to -5.2%)    |
| 22 | New Zealand | Other unintentional injuries                    | 1 (1 to 1)  | 1 (1 to 1)  | -3% (-9.9% to 4.7%)       |
| 23 | New Zealand | Pedestrian road injuries                        | 0 (0 to 0)  | 0 (0 to 0)  | -17.3% (-28.5% to -4.4%)  |
| 24 | New Zealand | Physical violence by firearm                    | 0 (0 to 0)  | 0 (0 to 0)  | -15.5% (-25.2% to -3.6%)  |
| 25 | New Zealand | Physical violence by other means                | 1 (0 to 1)  | 1 (0 to 1)  | 8.6% (-1.5% to 22.3%)     |
| 26 | New Zealand | Physical violence by sharp object               | 0 (0 to 0)  | 0 (0 to 0)  | -31.8% (-40.8% to -21.3%) |
| 27 | New Zealand | Poisoning by carbon monoxide                    | 0 (0 to 0)  | 0 (0 to 0)  | -5.7% (-20.7% to 14.3%)   |
| 28 | New Zealand | Poisoning by other means                        | 0 (0 to 0)  | 0 (0 to 0)  | -19.3% (-26.8% to -9.7%)  |
| 29 | New Zealand | Pulmonary aspiration and foreign body in airway | 0 (0 to 0)  | 0 (0 to 0)  | 16.3% (4.2% to 31.3%)     |
| 30 | New Zealand | Self-harm by firearm                            | 0 (0 to 0)  | 0 (0 to 0)  | -73.2% (-79.3% to -66.7%) |
| 31 | New Zealand | Self-harm by other specified means              | 0 (0 to 1)  | 0 (0 to 1)  | -23.7% (-29.8% to -18.3%) |
| 32 | New Zealand | Unintentional firearm injuries                  | 0 (0 to 0)  | 0 (0 to 0)  | -40.1% (-52.1% to -23%)   |
| 33 | New Zealand | Venomous animal contact                         | 0 (0 to 0)  | 0 (0 to 0)  | -22.1% (-37.8% to -1.6%)  |
| 34 | Nicaragua   | Adverse effects of medical treatment            | 0 (0 to 0)  | 0 (0 to 0)  | 0% (0% to 0%)             |
| 35 | Nicaragua   | Conflict and terrorism                          | 1 (0 to 3)  | 0 (0 to 0)  | NA                        |
| 36 | Nicaragua   | Cyclist road injuries                           | 0 (0 to 0)  | 0 (0 to 0)  | -13.6% (-22.2% to -2.6%)  |
| 37 | Nicaragua   | Drowning                                        | 0 (0 to 0)  | 0 (0 to 0)  | 37.5% (18.9% to 59.4%)    |
| 38 | Nicaragua   | Environmental heat and cold exposure            | 0 (0 to 0)  | 0 (0 to 0)  | 3.2% (-0.8% to 7.9%)      |
| 39 | Nicaragua   | Executions and police conflict                  | 0 (0 to 0)  | 0 (0 to 0)  | NA                        |
| 40 | Nicaragua   | Exposure to forces of nature                    | 0 (0 to 0)  | 0 (0 to 0)  | NA                        |
| 41 | Nicaragua   | Falls                                           | 2 (1 to 2)  | 2 (1 to 3)  | 27.8% (22.7% to 32.7%)    |
| 42 | Nicaragua   | Fire, heat, and hot substances                  | 0 (0 to 0)  | 0 (0 to 0)  | -3.3% (-10% to 4.3%)      |
| 43 | Nicaragua   | Foreign body in eyes                            | 0 (0 to 0)  | 0 (0 to 0)  | 0% (0% to 0%)             |
| 44 | Nicaragua   | Foreign body in other body part                 | 0 (0 to 0)  | 0 (0 to 0)  | -1.4% (-5.5% to 2.4%)     |
| 45 |             |                                                 |             |             |                           |
| 46 |             |                                                 |             |             |                           |

|    |           |                                                 |            |            |                           |
|----|-----------|-------------------------------------------------|------------|------------|---------------------------|
| 1  |           |                                                 |            |            |                           |
| 2  | Nicaragua | Motor vehicle road injuries                     | 1 (0 to 1) | 0 (0 to 1) | -15.4% (-22.7% to -7.3%)  |
| 3  | Nicaragua | Motorcyclist road injuries                      | 0 (0 to 0) | 0 (0 to 0) | 56% (39.2% to 76.3%)      |
| 4  | Nicaragua | Non-venomous animal contact                     | 0 (0 to 0) | 0 (0 to 0) | -10% (-14.4% to -5.5%)    |
| 5  | Nicaragua | Other exposure to mechanical forces             | 0 (0 to 1) | 0 (0 to 1) | -6.1% (-15% to 3.3%)      |
| 6  | Nicaragua | Other road injuries                             | 0 (0 to 0) | 0 (0 to 0) | -16.1% (-25.4% to -6.3%)  |
| 7  | Nicaragua | Other transport injuries                        | 0 (0 to 0) | 0 (0 to 0) | 1.9% (-2.6% to 6.3%)      |
| 8  | Nicaragua | Other unintentional injuries                    | 0 (0 to 0) | 0 (0 to 0) | -27.5% (-33.4% to -21.3%) |
| 9  | Nicaragua | Pedestrian road injuries                        | 0 (0 to 1) | 0 (0 to 0) | -40.5% (-47.2% to -33.4%) |
| 10 | Nicaragua | Physical violence by firearm                    | 0 (0 to 0) | 0 (0 to 0) | 42.7% (23.9% to 68.7%)    |
| 11 | Nicaragua | Physical violence by other means                | 0 (0 to 0) | 0 (0 to 0) | -20.5% (-29.6% to -10.7%) |
| 12 | Nicaragua | Physical violence by sharp object               | 0 (0 to 0) | 0 (0 to 0) | -23.8% (-32.8% to -14.7%) |
| 13 | Nicaragua | Poisoning by carbon monoxide                    | 0 (0 to 0) | 0 (0 to 0) | 36.3% (21.1% to 53%)      |
| 14 | Nicaragua | Poisoning by other means                        | 0 (0 to 0) | 0 (0 to 0) | -9.2% (-17% to -0.6%)     |
| 15 | Nicaragua | Pulmonary aspiration and foreign body in airway | 0 (0 to 0) | 0 (0 to 0) | -33.3% (-41.7% to -25.2%) |
| 16 | Nicaragua | Self-harm by firearm                            | 0 (0 to 0) | 0 (0 to 0) | 10.5% (-2.2% to 26%)      |
| 17 | Nicaragua | Self-harm by other specified means              | 0 (0 to 0) | 0 (0 to 0) | 1.2% (-5.5% to 8.8%)      |
| 18 | Nicaragua | Unintentional firearm injuries                  | 0 (0 to 0) | 0 (0 to 0) | -25.7% (-36.1% to -17.3%) |
| 19 | Nicaragua | Venomous animal contact                         | 0 (0 to 0) | 0 (0 to 0) | -8.3% (-13% to -2.8%)     |
| 20 | Niger     | Adverse effects of medical treatment            | 0 (0 to 0) | 0 (0 to 0) | 0% (0% to 0%)             |
| 21 | Niger     | Conflict and terrorism                          | 1 (0 to 2) | 1 (0 to 2) | NA                        |
| 22 | Niger     | Cyclist road injuries                           | 1 (0 to 2) | 1 (1 to 2) | 14.3% (7.4% to 21.8%)     |
| 23 | Niger     | Drowning                                        | 0 (0 to 0) | 0 (0 to 0) | -11.4% (-18.2% to -4.1%)  |
| 24 | Niger     | Environmental heat and cold exposure            | 0 (0 to 0) | 0 (0 to 0) | -3.8% (-9.2% to 1.7%)     |
| 25 | Niger     | Executions and police conflict                  | 0 (0 to 0) | 0 (0 to 0) | NA                        |
| 26 | Niger     | Exposure to forces of nature                    | 0 (0 to 0) | 0 (0 to 0) | NA                        |
| 27 | Niger     | Falls                                           | 3 (2 to 4) | 3 (2 to 5) | 17.3% (13% to 22%)        |
| 28 | Niger     | Fire, heat, and hot substances                  | 0 (0 to 0) | 0 (0 to 0) | -11.2% (-17.2% to -5.8%)  |
| 29 | Niger     | Foreign body in eyes                            | 0 (0 to 0) | 0 (0 to 0) | 0% (0% to 0%)             |
| 30 | Niger     | Foreign body in other body part                 | 1 (0 to 1) | 1 (0 to 1) | 0% (-3.6% to 3.4%)        |
| 31 | Niger     | Motor vehicle road injuries                     | 1 (1 to 3) | 1 (1 to 3) | 6.4% (-1% to 14.3%)       |
| 32 | Niger     | Motorcyclist road injuries                      | 1 (0 to 1) | 1 (0 to 1) | -8.8% (-15.5% to -0.9%)   |
| 33 | Niger     | Non-venomous animal contact                     | 0 (0 to 1) | 0 (0 to 0) | -8% (-12.3% to -4.3%)     |
| 34 | Niger     | Other exposure to mechanical forces             | 0 (0 to 0) | 0 (0 to 0) | -10.7% (-15.3% to -5.7%)  |
| 35 | Niger     | Other road injuries                             | 0 (0 to 0) | 0 (0 to 0) | 12.4% (3% to 22.3%)       |
| 36 | Niger     | Other transport injuries                        | 0 (0 to 1) | 0 (0 to 1) | -11.3% (-15.9% to -7.3%)  |
| 37 | Niger     | Other unintentional injuries                    | 0 (0 to 0) | 0 (0 to 0) | -13% (-17% to -9%)        |
| 38 | Niger     | Pedestrian road injuries                        | 2 (1 to 3) | 2 (1 to 3) | -1.6% (-8.4% to 5.6%)     |
| 39 | Niger     | Physical violence by firearm                    | 0 (0 to 0) | 0 (0 to 0) | 9.7% (-1.3% to 24.8%)     |
| 40 | Niger     | Physical violence by other means                | 0 (0 to 0) | 0 (0 to 0) | -5.1% (-10.2% to 0.2%)    |
| 41 | Niger     | Physical violence by sharp object               | 0 (0 to 0) | 0 (0 to 0) | -6.3% (-12.7% to 0.4%)    |
| 42 | Niger     | Poisoning by carbon monoxide                    | 0 (0 to 0) | 0 (0 to 0) | 16.6% (2.7% to 31.1%)     |
| 43 | Niger     | Poisoning by other means                        | 0 (0 to 0) | 0 (0 to 0) | -22.4% (-29.7% to -14.2%) |
| 44 | Niger     | Pulmonary aspiration and foreign body in airway | 0 (0 to 0) | 0 (0 to 0) | -11.5% (-20.3% to -2%)    |
| 45 |           |                                                 |            |            |                           |
| 46 |           |                                                 |            |            |                           |

|    |         |                                                 |            |            |                           |
|----|---------|-------------------------------------------------|------------|------------|---------------------------|
| 1  |         |                                                 |            |            |                           |
| 2  | Niger   | Self-harm by firearm                            | 0 (0 to 0) | 0 (0 to 0) | 20.3% (7.8% to 33.6%)     |
| 3  | Niger   | Self-harm by other specified means              | 0 (0 to 0) | 0 (0 to 0) | 9.7% (4.9% to 14.5%)      |
| 4  | Niger   | Unintentional firearm injuries                  | 0 (0 to 0) | 0 (0 to 0) | -15.7% (-23% to -9%)      |
| 5  | Niger   | Venomous animal contact                         | 0 (0 to 0) | 0 (0 to 0) | -5.5% (-11.8% to 1.5%)    |
| 6  | Nigeria | Adverse effects of medical treatment            | 0 (0 to 0) | 0 (0 to 0) | 0% (0% to 0%)             |
| 7  | Nigeria | Conflict and terrorism                          | 0 (0 to 0) | 0 (0 to 1) | NA                        |
| 8  | Nigeria | Cyclist road injuries                           | 1 (0 to 2) | 1 (1 to 2) | 17% (14.1% to 20.1%)      |
| 9  | Nigeria | Drowning                                        | 0 (0 to 0) | 0 (0 to 0) | -11.6% (-16.7% to -6.6%)  |
| 10 | Nigeria | Environmental heat and cold exposure            | 0 (0 to 0) | 0 (0 to 0) | -4.2% (-7.1% to -1.4%)    |
| 11 | Nigeria | Executions and police conflict                  | 0 (0 to 0) | 0 (0 to 0) | NA                        |
| 12 | Nigeria | Exposure to forces of nature                    | 0 (0 to 0) | 0 (0 to 0) | NA                        |
| 13 | Nigeria | Falls                                           | 3 (2 to 5) | 3 (2 to 5) | 4% (3% to 5.1%)           |
| 14 | Nigeria | Fire, heat, and hot substances                  | 0 (0 to 0) | 0 (0 to 0) | -12.7% (-15.5% to -10.4%) |
| 15 | Nigeria | Foreign body in eyes                            | 0 (0 to 0) | 0 (0 to 0) | 0% (0% to 0%)             |
| 16 | Nigeria | Foreign body in other body part                 | 1 (1 to 1) | 1 (1 to 1) | -1.5% (-2.4% to -0.5%)    |
| 17 | Nigeria | Motor vehicle road injuries                     | 1 (1 to 2) | 1 (1 to 3) | 13.9% (11.3% to 17.1%)    |
| 18 | Nigeria | Motorcyclist road injuries                      | 1 (0 to 1) | 1 (0 to 1) | 9.5% (6.5% to 12.5%)      |
| 19 | Nigeria | Non-venomous animal contact                     | 0 (0 to 0) | 0 (0 to 0) | -21.8% (-24.7% to -18.9%) |
| 20 | Nigeria | Other exposure to mechanical forces             | 0 (0 to 0) | 0 (0 to 0) | -17.8% (-20.3% to -15.1%) |
| 21 | Nigeria | Other road injuries                             | 0 (0 to 0) | 0 (0 to 0) | 15% (11.8% to 18.3%)      |
| 22 | Nigeria | Other transport injuries                        | 0 (0 to 0) | 0 (0 to 0) | -5.2% (-7.2% to -3.4%)    |
| 23 | Nigeria | Other unintentional injuries                    | 0 (0 to 0) | 0 (0 to 0) | -17.7% (-21.2% to -14.1%) |
| 24 | Nigeria | Pedestrian road injuries                        | 1 (1 to 3) | 2 (1 to 3) | 8.2% (5.6% to 10.5%)      |
| 25 | Nigeria | Physical violence by firearm                    | 0 (0 to 0) | 0 (0 to 0) | 5.5% (0.5% to 10%)        |
| 26 | Nigeria | Physical violence by other means                | 0 (0 to 0) | 0 (0 to 0) | -0.8% (-3.1% to 1.4%)     |
| 27 | Nigeria | Physical violence by sharp object               | 0 (0 to 0) | 0 (0 to 0) | -4.7% (-7.3% to -2.5%)    |
| 28 | Nigeria | Poisoning by carbon monoxide                    | 0 (0 to 0) | 0 (0 to 0) | -8.7% (-12.5% to -4.8%)   |
| 29 | Nigeria | Poisoning by other means                        | 0 (0 to 0) | 0 (0 to 0) | -23.1% (-26.3% to -19.6%) |
| 30 | Nigeria | Pulmonary aspiration and foreign body in airway | 0 (0 to 0) | 0 (0 to 0) | -13.1% (-15.8% to -10.5%) |
| 31 | Nigeria | Self-harm by firearm                            | 0 (0 to 0) | 0 (0 to 0) | 8.7% (5.5% to 12%)        |
| 32 | Nigeria | Self-harm by other specified means              | 0 (0 to 0) | 0 (0 to 0) | -1% (-3.4% to 1%)         |
| 33 | Nigeria | Unintentional firearm injuries                  | 0 (0 to 0) | 0 (0 to 0) | -27.7% (-33.2% to -23.3%) |
| 34 | Nigeria | Venomous animal contact                         | 0 (0 to 0) | 0 (0 to 0) | -21.9% (-26.2% to -17.6%) |
| 35 | Niue    | Adverse effects of medical treatment            | 0 (0 to 0) | 0 (0 to 0) | 0% (0% to 0%)             |
| 36 | Niue    | Conflict and terrorism                          | 0 (0 to 0) | 0 (0 to 0) | NA                        |
| 37 | Niue    | Cyclist road injuries                           | 0 (0 to 1) | 0 (0 to 1) | 3.1% (-3.7% to 10.8%)     |
| 38 | Niue    | Drowning                                        | 0 (0 to 0) | 0 (0 to 0) | 54.8% (40.3% to 68%)      |
| 39 | Niue    | Environmental heat and cold exposure            | 0 (0 to 0) | 0 (0 to 0) | 0.4% (-4.3% to 5.3%)      |
| 40 | Niue    | Executions and police conflict                  | 0 (0 to 0) | 0 (0 to 0) | NA                        |
| 41 | Niue    | Exposure to forces of nature                    | 0 (0 to 0) | 0 (0 to 0) | NA                        |
| 42 | Niue    | Falls                                           | 4 (2 to 5) | 6 (4 to 8) | 57.2% (51.2% to 63.5%)    |
| 43 | Niue    | Fire, heat, and hot substances                  | 0 (0 to 0) | 0 (0 to 0) | 5.1% (0.7% to 9.6%)       |
| 44 | Niue    | Foreign body in eyes                            | 0 (0 to 0) | 0 (0 to 0) | 0% (0% to 0%)             |
| 45 |         |                                                 |            |            |                           |
| 46 |         |                                                 |            |            |                           |

|    |                 |                                                 |            |            |                           |
|----|-----------------|-------------------------------------------------|------------|------------|---------------------------|
| 1  |                 |                                                 |            |            |                           |
| 2  | Niue            | Foreign body in other body part                 | 0 (0 to 0) | 0 (0 to 0) | -1.2% (-4.5% to 2.6%)     |
| 3  | Niue            | Motor vehicle road injuries                     | 1 (0 to 2) | 1 (0 to 2) | -14.2% (-20.9% to -7.8%)  |
| 4  | Niue            | Motorcyclist road injuries                      | 1 (0 to 1) | 1 (0 to 1) | -4.2% (-11.6% to 3.6%)    |
| 5  | Niue            | Non-venomous animal contact                     | 0 (0 to 0) | 0 (0 to 0) | -15% (-18.5% to -11.6%)   |
| 6  | Niue            | Other exposure to mechanical forces             | 0 (0 to 0) | 0 (0 to 0) | -11.1% (-15.9% to -6.3%)  |
| 7  | Niue            | Other road injuries                             | 0 (0 to 0) | 0 (0 to 0) | 1.9% (-7% to 11%)         |
| 8  | Niue            | Other transport injuries                        | 0 (0 to 1) | 0 (0 to 0) | -7% (-11.4% to -2.4%)     |
| 9  | Niue            | Other unintentional injuries                    | 0 (0 to 0) | 0 (0 to 0) | -3.7% (-8.3% to 0.5%)     |
| 10 | Niue            | Pedestrian road injuries                        | 1 (0 to 1) | 1 (0 to 1) | -9.8% (-17.1% to -2.8%)   |
| 11 | Niue            | Physical violence by firearm                    | 0 (0 to 0) | 0 (0 to 0) | 6% (-6.4% to 17.9%)       |
| 12 | Niue            | Physical violence by other means                | 1 (0 to 1) | 1 (0 to 1) | -11.7% (-17.7% to -6.1%)  |
| 13 | Niue            | Physical violence by sharp object               | 0 (0 to 0) | 0 (0 to 0) | -29.3% (-38% to -21%)     |
| 14 | Niue            | Poisoning by carbon monoxide                    | 0 (0 to 0) | 0 (0 to 0) | 15.1% (6.2% to 25.1%)     |
| 15 | Niue            | Poisoning by other means                        | 0 (0 to 0) | 0 (0 to 0) | -10.5% (-15.9% to -4.3%)  |
| 16 | Niue            | Pulmonary aspiration and foreign body in airway | 0 (0 to 0) | 0 (0 to 0) | -5.8% (-14.9% to 3.8%)    |
| 17 | Niue            | Self-harm by firearm                            | 0 (0 to 0) | 0 (0 to 0) | -10.8% (-22.4% to 2.8%)   |
| 18 | Niue            | Self-harm by other specified means              | 0 (0 to 0) | 0 (0 to 0) | -9.7% (-15.7% to -3.6%)   |
| 19 | Niue            | Unintentional firearm injuries                  | 0 (0 to 0) | 0 (0 to 0) | -10.8% (-17.7% to -4%)    |
| 20 | Niue            | Venomous animal contact                         | 0 (0 to 0) | 0 (0 to 0) | -11.8% (-17.9% to -4.9%)  |
| 21 | North Macedonia | Adverse effects of medical treatment            | 0 (0 to 0) | 0 (0 to 0) | 0% (0% to 0%)             |
| 22 | North Macedonia | Conflict and terrorism                          | 0 (0 to 0) | 0 (0 to 0) | NA                        |
| 23 | North Macedonia | Cyclist road injuries                           | 1 (0 to 1) | 1 (0 to 1) | -4.2% (-12.5% to 3.8%)    |
| 24 | North Macedonia | Drowning                                        | 0 (0 to 0) | 0 (0 to 0) | 197.2% (156% to 251.8%)   |
| 25 | North Macedonia | Environmental heat and cold exposure            | 0 (0 to 0) | 0 (0 to 0) | 2.9% (-1% to 6.7%)        |
| 26 | North Macedonia | Executions and police conflict                  | 0 (0 to 0) | 0 (0 to 0) | NA                        |
| 27 | North Macedonia | Exposure to forces of nature                    | 0 (0 to 0) | 0 (0 to 0) | NA                        |
| 28 | North Macedonia | Falls                                           | 3 (2 to 4) | 5 (4 to 7) | 70% (60.1% to 79.9%)      |
| 29 | North Macedonia | Fire, heat, and hot substances                  | 0 (0 to 0) | 0 (0 to 0) | 5.4% (1.7% to 9.7%)       |
| 30 | North Macedonia | Foreign body in eyes                            | 0 (0 to 0) | 0 (0 to 0) | 0% (0% to 0%)             |
| 31 | North Macedonia | Foreign body in other body part                 | 0 (0 to 0) | 0 (0 to 0) | 1.7% (-3% to 6.4%)        |
| 32 | North Macedonia | Motor vehicle road injuries                     | 1 (1 to 2) | 1 (1 to 2) | 1.9% (-6.5% to 9.8%)      |
| 33 | North Macedonia | Motorcyclist road injuries                      | 0 (0 to 0) | 0 (0 to 0) | 22.6% (7.2% to 39.9%)     |
| 34 | North Macedonia | Non-venomous animal contact                     | 0 (0 to 0) | 0 (0 to 0) | -9.2% (-13% to -5.1%)     |
| 35 | North Macedonia | Other exposure to mechanical forces             | 1 (1 to 3) | 2 (1 to 3) | 6.3% (1.4% to 11.1%)      |
| 36 | North Macedonia | Other road injuries                             | 0 (0 to 0) | 0 (0 to 0) | -8.8% (-18.6% to 0.1%)    |
| 37 | North Macedonia | Other transport injuries                        | 0 (0 to 0) | 0 (0 to 0) | 8.5% (3.6% to 13.6%)      |
| 38 | North Macedonia | Other unintentional injuries                    | 1 (1 to 1) | 0 (0 to 1) | -63.8% (-67.4% to -59.7%) |
| 39 | North Macedonia | Pedestrian road injuries                        | 0 (0 to 1) | 0 (0 to 1) | -22.9% (-30.5% to -15%)   |
| 40 | North Macedonia | Physical violence by firearm                    | 0 (0 to 0) | 0 (0 to 0) | 83.2% (58.8% to 113%)     |
| 41 | North Macedonia | Physical violence by other means                | 0 (0 to 1) | 0 (0 to 1) | -30.9% (-39.7% to -23%)   |
| 42 | North Macedonia | Physical violence by sharp object               | 0 (0 to 0) | 0 (0 to 0) | -7.1% (-19.8% to 7.7%)    |
| 43 | North Macedonia | Poisoning by carbon monoxide                    | 0 (0 to 0) | 0 (0 to 0) | 39.1% (29% to 52.1%)      |
| 44 | North Macedonia | Poisoning by other means                        | 0 (0 to 0) | 0 (0 to 0) | 5.9% (-0.8% to 12.3%)     |
| 45 |                 |                                                 |            |            |                           |
| 46 |                 |                                                 |            |            |                           |



|    |                          |                                                 |               |               |                           |
|----|--------------------------|-------------------------------------------------|---------------|---------------|---------------------------|
| 1  |                          |                                                 |               |               |                           |
| 2  | North Macedonia          | Pulmonary aspiration and foreign body in airway | 0 (0 to 0)    | 0 (0 to 0)    | -9.4% (-15.9% to -2.1%)   |
| 3  | North Macedonia          | Self-harm by firearm                            | 0 (0 to 0)    | 0 (0 to 0)    | 28.5% (15% to 48.4%)      |
| 4  | North Macedonia          | Self-harm by other specified means              | 0 (0 to 0)    | 0 (0 to 0)    | -12.6% (-17.7% to -7.1%)  |
| 5  | North Macedonia          | Unintentional firearm injuries                  | 0 (0 to 0)    | 0 (0 to 0)    | -7.5% (-15.6% to 0.6%)    |
| 6  | North Macedonia          | Venomous animal contact                         | 0 (0 to 0)    | 0 (0 to 0)    | -10.8% (-15.8% to -5.2%)  |
| 7  | Northern Mariana Islands | Adverse effects of medical treatment            | 0 (0 to 0)    | 0 (0 to 0)    | 0% (0% to 0%)             |
| 8  | Northern Mariana Islands | Conflict and terrorism                          | 0 (0 to 0)    | 0 (0 to 0)    | NA                        |
| 9  | Northern Mariana Islands | Cyclist road injuries                           | 0 (0 to 1)    | 0 (0 to 1)    | 0% (-7.7% to 8.8%)        |
| 10 | Northern Mariana Islands | Drowning                                        | 0 (0 to 0)    | 0 (0 to 0)    | 40.5% (29.5% to 52%)      |
| 11 | Northern Mariana Islands | Environmental heat and cold exposure            | 0 (0 to 0)    | 0 (0 to 0)    | 2.2% (-4.2% to 7.2%)      |
| 12 | Northern Mariana Islands | Executions and police conflict                  | 0 (0 to 0)    | 0 (0 to 0)    | NA                        |
| 13 | Northern Mariana Islands | Exposure to forces of nature                    | 0 (0 to 0)    | 0 (0 to 0)    | NA                        |
| 14 | Northern Mariana Islands | Falls                                           | 6 (4 to 8)    | 8 (6 to 12)   | 45.2% (39.3% to 51.3%)    |
| 15 | Northern Mariana Islands | Fire, heat, and hot substances                  | 0 (0 to 0)    | 0 (0 to 0)    | 4.1% (-1.5% to 9.1%)      |
| 16 | Northern Mariana Islands | Foreign body in eyes                            | 0 (0 to 0)    | 0 (0 to 0)    | 0% (0% to 0%)             |
| 17 | Northern Mariana Islands | Foreign body in other body part                 | 0 (0 to 0)    | 0 (0 to 0)    | -1.5% (-5.1% to 2.6%)     |
| 18 | Northern Mariana Islands | Motor vehicle road injuries                     | 1 (1 to 3)    | 1 (0 to 2)    | -44.5% (-49.7% to -39.6%) |
| 19 | Northern Mariana Islands | Motorcyclist road injuries                      | 1 (0 to 2)    | 1 (0 to 1)    | -12.3% (-20.1% to -2.1%)  |
| 20 | Northern Mariana Islands | Non-venomous animal contact                     | 0 (0 to 0)    | 0 (0 to 0)    | 10.3% (5.6% to 15.2%)     |
| 21 | Northern Mariana Islands | Other exposure to mechanical forces             | 0 (0 to 1)    | 0 (0 to 0)    | -37.8% (-43.2% to -32.2%) |
| 22 | Northern Mariana Islands | Other road injuries                             | 0 (0 to 0)    | 0 (0 to 0)    | -7.9% (-17.3% to 2.9%)    |
| 23 | Northern Mariana Islands | Other transport injuries                        | 1 (0 to 1)    | 0 (0 to 1)    | -39.9% (-45.3% to -34.1%) |
| 24 | Northern Mariana Islands | Other unintentional injuries                    | 0 (0 to 1)    | 0 (0 to 0)    | -17.1% (-21.4% to -12.4%) |
| 25 | Northern Mariana Islands | Pedestrian road injuries                        | 1 (1 to 2)    | 1 (0 to 1)    | -37.8% (-43.7% to -31.9%) |
| 26 | Northern Mariana Islands | Physical violence by firearm                    | 0 (0 to 0)    | 0 (0 to 0)    | -43.8% (-53.4% to -33.5%) |
| 27 | Northern Mariana Islands | Physical violence by other means                | 1 (0 to 2)    | 1 (0 to 1)    | -9.1% (-15.2% to -1.5%)   |
| 28 | Northern Mariana Islands | Physical violence by sharp object               | 0 (0 to 0)    | 0 (0 to 0)    | -55.4% (-62% to -48.2%)   |
| 29 | Northern Mariana Islands | Poisoning by carbon monoxide                    | 0 (0 to 0)    | 0 (0 to 0)    | 13% (4.3% to 22.7%)       |
| 30 | Northern Mariana Islands | Poisoning by other means                        | 0 (0 to 0)    | 0 (0 to 0)    | -5.9% (-12.2% to 0.2%)    |
| 31 | Northern Mariana Islands | Pulmonary aspiration and foreign body in airway | 0 (0 to 0)    | 0 (0 to 0)    | 27.1% (11.2% to 45.3%)    |
| 32 | Northern Mariana Islands | Self-harm by firearm                            | 0 (0 to 0)    | 0 (0 to 0)    | -11.5% (-30.4% to 5.3%)   |
| 33 | Northern Mariana Islands | Self-harm by other specified means              | 0 (0 to 0)    | 0 (0 to 0)    | 31.3% (21.8% to 43.3%)    |
| 34 | Northern Mariana Islands | Unintentional firearm injuries                  | 0 (0 to 0)    | 0 (0 to 0)    | -39.7% (-47.8% to -31.4%) |
| 35 | Northern Mariana Islands | Venomous animal contact                         | 0 (0 to 0)    | 0 (0 to 0)    | 8.1% (0.2% to 15.5%)      |
| 36 | Norway                   | Adverse effects of medical treatment            | 0 (0 to 0)    | 0 (0 to 0)    | 0% (0% to 0%)             |
| 37 | Norway                   | Conflict and terrorism                          | 0 (0 to 0)    | 0 (0 to 0)    | NA                        |
| 38 | Norway                   | Cyclist road injuries                           | 1 (0 to 1)    | 0 (0 to 1)    | -28.5% (-32.2% to -24.6%) |
| 39 | Norway                   | Drowning                                        | 0 (0 to 0)    | 0 (0 to 0)    | -7.8% (-11.6% to -4.3%)   |
| 40 | Norway                   | Environmental heat and cold exposure            | 0 (0 to 0)    | 0 (0 to 0)    | -14.7% (-18% to -12.2%)   |
| 41 | Norway                   | Executions and police conflict                  | 0 (0 to 0)    | 0 (0 to 0)    | NA                        |
| 42 | Norway                   | Exposure to forces of nature                    | 0 (0 to 0)    | 0 (0 to 0)    | NA                        |
| 43 | Norway                   | Falls                                           | 20 (13 to 31) | 21 (14 to 33) | 6.6% (3.9% to 9.5%)       |
| 44 | Norway                   | Fire, heat, and hot substances                  | 0 (0 to 0)    | 0 (0 to 0)    | -25.3% (-28.6% to -22.2%) |
| 45 |                          |                                                 |               |               |                           |
| 46 |                          |                                                 |               |               |                           |

|    |        |                                                 |            |            |                           |
|----|--------|-------------------------------------------------|------------|------------|---------------------------|
| 1  |        |                                                 |            |            |                           |
| 2  | Norway | Foreign body in eyes                            | 0 (0 to 0) | 0 (0 to 0) | 0% (0% to 0%)             |
| 3  | Norway | Foreign body in other body part                 | 1 (0 to 1) | 1 (0 to 1) | 2.7% (1.8% to 3.8%)       |
| 4  | Norway | Motor vehicle road injuries                     | 1 (0 to 1) | 0 (0 to 1) | -43.5% (-47% to -39.8%)   |
| 5  | Norway | Motorcyclist road injuries                      | 1 (0 to 1) | 0 (0 to 1) | -47.9% (-51.5% to -44.5%) |
| 6  | Norway | Non-venomous animal contact                     | 0 (0 to 0) | 0 (0 to 0) | -6.3% (-7.9% to -4.7%)    |
| 7  | Norway | Other exposure to mechanical forces             | 1 (0 to 2) | 1 (0 to 1) | -20.1% (-24.6% to -16.7%) |
| 8  | Norway | Other road injuries                             | 0 (0 to 0) | 0 (0 to 0) | -58.7% (-64.2% to -53.5%) |
| 9  | Norway | Other transport injuries                        | 1 (0 to 1) | 0 (0 to 1) | -47.4% (-49.5% to -45.3%) |
| 10 | Norway | Other unintentional injuries                    | 1 (0 to 1) | 1 (0 to 1) | -4.8% (-8% to -1.7%)      |
| 11 | Norway | Pedestrian road injuries                        | 0 (0 to 1) | 0 (0 to 0) | -38.6% (-43.9% to -32.7%) |
| 12 | Norway | Physical violence by firearm                    | 0 (0 to 0) | 0 (0 to 0) | 25.6% (17.1% to 36%)      |
| 13 | Norway | Physical violence by other means                | 0 (0 to 1) | 0 (0 to 0) | -20.8% (-25.5% to -16.9%) |
| 14 | Norway | Physical violence by sharp object               | 0 (0 to 0) | 0 (0 to 0) | -25.7% (-32.4% to -19.8%) |
| 15 | Norway | Poisoning by carbon monoxide                    | 0 (0 to 0) | 0 (0 to 0) | -1.6% (-5.5% to 2.1%)     |
| 16 | Norway | Poisoning by other means                        | 0 (0 to 0) | 0 (0 to 0) | 18.8% (14.5% to 22.5%)    |
| 17 | Norway | Pulmonary aspiration and foreign body in airway | 0 (0 to 0) | 0 (0 to 0) | -10.6% (-13.8% to -7.8%)  |
| 18 | Norway | Self-harm by firearm                            | 0 (0 to 0) | 0 (0 to 0) | -48.2% (-55.8% to -41%)   |
| 19 | Norway | Self-harm by other specified means              | 0 (0 to 0) | 0 (0 to 0) | -24.1% (-26.6% to -20.5%) |
| 20 | Norway | Unintentional firearm injuries                  | 0 (0 to 0) | 0 (0 to 0) | -1.8% (-7.2% to 2.2%)     |
| 21 | Norway | Venomous animal contact                         | 0 (0 to 0) | 0 (0 to 0) | -6% (-8.6% to -2.9%)      |
| 22 | Oman   | Adverse effects of medical treatment            | 0 (0 to 0) | 0 (0 to 0) | 0% (0% to 0%)             |
| 23 | Oman   | Conflict and terrorism                          | 0 (0 to 0) | 0 (0 to 0) | NA                        |
| 24 | Oman   | Cyclist road injuries                           | 0 (0 to 0) | 0 (0 to 0) | -17.3% (-26.2% to -7.5%)  |
| 25 | Oman   | Drowning                                        | 0 (0 to 0) | 0 (0 to 0) | 67.6% (47.1% to 90.6%)    |
| 26 | Oman   | Environmental heat and cold exposure            | 0 (0 to 0) | 0 (0 to 0) | -8.7% (-13.6% to -3%)     |
| 27 | Oman   | Executions and police conflict                  | 0 (0 to 0) | 0 (0 to 0) | NA                        |
| 28 | Oman   | Exposure to forces of nature                    | 0 (0 to 0) | 0 (0 to 0) | NA                        |
| 29 | Oman   | Falls                                           | 3 (2 to 3) | 3 (2 to 5) | 27.5% (22.4% to 32.9%)    |
| 30 | Oman   | Fire, heat, and hot substances                  | 0 (0 to 0) | 0 (0 to 0) | 4% (-3.1% to 12%)         |
| 31 | Oman   | Foreign body in eyes                            | 0 (0 to 0) | 0 (0 to 0) | 0% (0% to 0%)             |
| 32 | Oman   | Foreign body in other body part                 | 0 (0 to 0) | 0 (0 to 0) | 0.2% (-3.4% to 4.1%)      |
| 33 | Oman   | Motor vehicle road injuries                     | 2 (1 to 3) | 1 (1 to 2) | -26% (-32.8% to -18.2%)   |
| 34 | Oman   | Motorcyclist road injuries                      | 0 (0 to 0) | 0 (0 to 0) | -27.8% (-38.4% to -15.5%) |
| 35 | Oman   | Non-venomous animal contact                     | 0 (0 to 0) | 0 (0 to 0) | -5.5% (-10.3% to -1.2%)   |
| 36 | Oman   | Other exposure to mechanical forces             | 0 (0 to 1) | 0 (0 to 0) | -36.8% (-43.6% to -30.7%) |
| 37 | Oman   | Other road injuries                             | 0 (0 to 0) | 0 (0 to 0) | -2.7% (-14% to 10.1%)     |
| 38 | Oman   | Other transport injuries                        | 0 (0 to 0) | 0 (0 to 0) | 9.1% (4% to 14.1%)        |
| 39 | Oman   | Other unintentional injuries                    | 0 (0 to 0) | 0 (0 to 0) | 9.8% (5.3% to 15%)        |
| 40 | Oman   | Pedestrian road injuries                        | 1 (0 to 1) | 1 (0 to 1) | -22.2% (-29.3% to -13.9%) |
| 41 | Oman   | Physical violence by firearm                    | 0 (0 to 0) | 0 (0 to 0) | 118.7% (87.3% to 159.5%)  |
| 42 | Oman   | Physical violence by other means                | 0 (0 to 0) | 0 (0 to 0) | -4.2% (-15% to 4.9%)      |
| 43 | Oman   | Physical violence by sharp object               | 0 (0 to 0) | 0 (0 to 0) | -5.9% (-18.3% to 4.4%)    |
| 44 | Oman   | Poisoning by carbon monoxide                    | 0 (0 to 0) | 0 (0 to 0) | 38.9% (25.3% to 54.2%)    |
| 45 |        |                                                 |            |            |                           |
| 46 |        |                                                 |            |            |                           |

|    |          |                                                 |             |              |                           |
|----|----------|-------------------------------------------------|-------------|--------------|---------------------------|
| 1  |          |                                                 |             |              |                           |
| 2  | Oman     | Poisoning by other means                        | 0 (0 to 0)  | 0 (0 to 0)   | -22.7% (-31.1% to -14.2%) |
| 3  | Oman     | Pulmonary aspiration and foreign body in airway | 0 (0 to 0)  | 0 (0 to 0)   | -2% (-9.6% to 4.9%)       |
| 4  | Oman     | Self-harm by firearm                            | 0 (0 to 0)  | 0 (0 to 0)   | 22.3% (9.1% to 39.8%)     |
| 5  | Oman     | Self-harm by other specified means              | 0 (0 to 0)  | 0 (0 to 0)   | 3.5% (-3.7% to 10.6%)     |
| 6  | Oman     | Unintentional firearm injuries                  | 0 (0 to 0)  | 0 (0 to 0)   | -4.7% (-15.1% to 7.1%)    |
| 7  | Oman     | Venomous animal contact                         | 0 (0 to 0)  | 0 (0 to 0)   | -2.4% (-8.7% to 4.6%)     |
| 8  | Pakistan | Adverse effects of medical treatment            | 0 (0 to 0)  | 0 (0 to 0)   | 0% (0% to 0%)             |
| 9  | Pakistan | Conflict and terrorism                          | 0 (0 to 0)  | 0 (0 to 0)   | NA                        |
| 10 | Pakistan | Cyclist road injuries                           | 1 (0 to 1)  | 1 (0 to 1)   | 27.4% (22% to 32.3%)      |
| 11 | Pakistan | Drowning                                        | 0 (0 to 0)  | 0 (0 to 0)   | -3.2% (-13.4% to 8%)      |
| 12 | Pakistan | Environmental heat and cold exposure            | 0 (0 to 0)  | 0 (0 to 0)   | 1.2% (-2% to 4.5%)        |
| 13 | Pakistan | Executions and police conflict                  | 0 (0 to 0)  | 0 (0 to 0)   | NA                        |
| 14 | Pakistan | Exposure to forces of nature                    | 0 (0 to 0)  | 0 (0 to 0)   | NA                        |
| 15 | Pakistan | Falls                                           | 1 (1 to 1)  | 1 (1 to 2)   | 31.2% (27.8% to 34.8%)    |
| 16 | Pakistan | Fire, heat, and hot substances                  | 0 (0 to 0)  | 0 (0 to 0)   | -8.1% (-11.8% to -3.8%)   |
| 17 | Pakistan | Foreign body in eyes                            | 0 (0 to 0)  | 0 (0 to 0)   | 0% (0% to 0%)             |
| 18 | Pakistan | Foreign body in other body part                 | 0 (0 to 0)  | 0 (0 to 0)   | -5.1% (-7.5% to -2.6%)    |
| 19 | Pakistan | Motor vehicle road injuries                     | 1 (0 to 1)  | 1 (0 to 1)   | 47.7% (41.3% to 54.1%)    |
| 20 | Pakistan | Motorcyclist road injuries                      | 0 (0 to 1)  | 1 (0 to 1)   | 74.1% (66.1% to 82.9%)    |
| 21 | Pakistan | Non-venomous animal contact                     | 0 (0 to 0)  | 0 (0 to 0)   | -15.8% (-18.4% to -13.3%) |
| 22 | Pakistan | Other exposure to mechanical forces             | 0 (0 to 0)  | 0 (0 to 0)   | -1.9% (-5.3% to 2.1%)     |
| 23 | Pakistan | Other road injuries                             | 0 (0 to 0)  | 0 (0 to 0)   | 19.6% (12.5% to 26.4%)    |
| 24 | Pakistan | Other transport injuries                        | 0 (0 to 0)  | 0 (0 to 0)   | 14.1% (10.6% to 17.6%)    |
| 25 | Pakistan | Other unintentional injuries                    | 0 (0 to 0)  | 0 (0 to 0)   | -12.8% (-15.3% to -9.6%)  |
| 26 | Pakistan | Pedestrian road injuries                        | 0 (0 to 1)  | 0 (0 to 1)   | 41% (34.4% to 47.6%)      |
| 27 | Pakistan | Physical violence by firearm                    | 0 (0 to 0)  | 0 (0 to 0)   | -13.3% (-19.9% to -5.2%)  |
| 28 | Pakistan | Physical violence by other means                | 1 (0 to 1)  | 1 (0 to 1)   | -7.1% (-11.2% to -2.7%)   |
| 29 | Pakistan | Physical violence by sharp object               | 0 (0 to 0)  | 0 (0 to 0)   | -0.3% (-5.9% to 6%)       |
| 30 | Pakistan | Poisoning by carbon monoxide                    | 0 (0 to 0)  | 0 (0 to 0)   | -16.5% (-23.6% to -9.7%)  |
| 31 | Pakistan | Poisoning by other means                        | 0 (0 to 0)  | 0 (0 to 0)   | -22.1% (-27.8% to -16.7%) |
| 32 | Pakistan | Pulmonary aspiration and foreign body in airway | 0 (0 to 0)  | 0 (0 to 0)   | -8.5% (-13.4% to -3.6%)   |
| 33 | Pakistan | Self-harm by firearm                            | 0 (0 to 0)  | 0 (0 to 0)   | 26.2% (17.1% to 35.7%)    |
| 34 | Pakistan | Self-harm by other specified means              | 0 (0 to 0)  | 0 (0 to 0)   | 20.4% (15.9% to 25.2%)    |
| 35 | Pakistan | Unintentional firearm injuries                  | 0 (0 to 0)  | 0 (0 to 0)   | -7.5% (-12.1% to -2.8%)   |
| 36 | Pakistan | Venomous animal contact                         | 0 (0 to 0)  | 0 (0 to 0)   | -10.2% (-15.5% to -5.3%)  |
| 37 | Palau    | Adverse effects of medical treatment            | 0 (0 to 0)  | 0 (0 to 0)   | 0% (0% to 0%)             |
| 38 | Palau    | Conflict and terrorism                          | 0 (0 to 0)  | 0 (0 to 0)   | NA                        |
| 39 | Palau    | Cyclist road injuries                           | 0 (0 to 1)  | 0 (0 to 1)   | 5.3% (-1.7% to 13.6%)     |
| 40 | Palau    | Drowning                                        | 0 (0 to 0)  | 0 (0 to 0)   | 34.4% (24.9% to 46.3%)    |
| 41 | Palau    | Environmental heat and cold exposure            | 0 (0 to 0)  | 0 (0 to 0)   | -4.1% (-8.3% to 0.8%)     |
| 42 | Palau    | Executions and police conflict                  | 0 (0 to 0)  | 0 (0 to 0)   | NA                        |
| 43 | Palau    | Exposure to forces of nature                    | 0 (0 to 0)  | 0 (0 to 0)   | NA                        |
| 44 | Palau    | Falls                                           | 8 (6 to 12) | 11 (7 to 16) | 31.8% (26.7% to 36.6%)    |
| 45 |          |                                                 |             |              |                           |
| 46 |          |                                                 |             |              |                           |

|    |           |                                                 |              |            |                           |
|----|-----------|-------------------------------------------------|--------------|------------|---------------------------|
| 1  |           |                                                 |              |            |                           |
| 2  | Palau     | Fire, heat, and hot substances                  | 0 (0 to 0)   | 0 (0 to 0) | -10.2% (-14.7% to -5.6%)  |
| 3  | Palau     | Foreign body in eyes                            | 0 (0 to 0)   | 0 (0 to 0) | 0% (0% to 0%)             |
| 4  | Palau     | Foreign body in other body part                 | 0 (0 to 0)   | 0 (0 to 0) | -3.3% (-6.7% to 0.1%)     |
| 5  | Palau     | Motor vehicle road injuries                     | 1 (0 to 1)   | 1 (0 to 1) | -1.2% (-8.5% to 7.2%)     |
| 6  | Palau     | Motorcyclist road injuries                      | 1 (0 to 2)   | 1 (0 to 2) | 0.2% (-7.5% to 8.5%)      |
| 7  | Palau     | Non-venomous animal contact                     | 0 (0 to 1)   | 0 (0 to 1) | -4.1% (-8.6% to 1.1%)     |
| 8  | Palau     | Other exposure to mechanical forces             | 0 (0 to 1)   | 0 (0 to 1) | -11.3% (-16.2% to -5.9%)  |
| 9  | Palau     | Other road injuries                             | 0 (0 to 0)   | 0 (0 to 0) | 8.7% (-2.6% to 21.2%)     |
| 10 | Palau     | Other transport injuries                        | 1 (0 to 1)   | 1 (0 to 1) | -0.1% (-5.3% to 4.4%)     |
| 11 | Palau     | Other unintentional injuries                    | 0 (0 to 1)   | 0 (0 to 1) | -9.2% (-13.8% to -4.4%)   |
| 12 | Palau     | Pedestrian road injuries                        | 1 (0 to 1)   | 1 (0 to 1) | -0.3% (-7.1% to 7.6%)     |
| 13 | Palau     | Physical violence by firearm                    | 0 (0 to 0)   | 0 (0 to 0) | 26.8% (13.5% to 41.5%)    |
| 14 | Palau     | Physical violence by other means                | 1 (0 to 2)   | 1 (0 to 2) | -5.9% (-11.2% to -0.2%)   |
| 15 | Palau     | Physical violence by sharp object               | 0 (0 to 0)   | 0 (0 to 0) | -11.4% (-20.9% to -0.6%)  |
| 16 | Palau     | Poisoning by carbon monoxide                    | 0 (0 to 0)   | 0 (0 to 0) | 8.1% (-2.1% to 19.5%)     |
| 17 | Palau     | Poisoning by other means                        | 0 (0 to 0)   | 0 (0 to 0) | -26% (-31.7% to -20.7%)   |
| 18 | Palau     | Pulmonary aspiration and foreign body in airway | 0 (0 to 0)   | 0 (0 to 0) | -8.4% (-17.4% to 1.6%)    |
| 19 | Palau     | Self-harm by firearm                            | 0 (0 to 0)   | 0 (0 to 0) | 13% (-3.7% to 33.9%)      |
| 20 | Palau     | Self-harm by other specified means              | 0 (0 to 0)   | 0 (0 to 0) | -3.5% (-10.9% to 4.6%)    |
| 21 | Palau     | Unintentional firearm injuries                  | 0 (0 to 0)   | 0 (0 to 0) | -12.9% (-19.7% to -5%)    |
| 22 | Palau     | Venomous animal contact                         | 0 (0 to 0)   | 0 (0 to 0) | -1.1% (-8.3% to 8.2%)     |
| 23 | Palestine | Adverse effects of medical treatment            | 0 (0 to 0)   | 0 (0 to 0) | 0% (0% to 0%)             |
| 24 | Palestine | Conflict and terrorism                          | 12 (3 to 37) | 1 (0 to 2) | NA                        |
| 25 | Palestine | Cyclist road injuries                           | 0 (0 to 0)   | 0 (0 to 0) | 0.5% (-8% to 10.8%)       |
| 26 | Palestine | Drowning                                        | 0 (0 to 0)   | 0 (0 to 0) | 63.2% (41.6% to 84.2%)    |
| 27 | Palestine | Environmental heat and cold exposure            | 0 (0 to 0)   | 0 (0 to 0) | 3% (-1.6% to 8.2%)        |
| 28 | Palestine | Executions and police conflict                  | 0 (0 to 0)   | 0 (0 to 0) | NA                        |
| 29 | Palestine | Exposure to forces of nature                    | 0 (0 to 0)   | 0 (0 to 0) | NA                        |
| 30 | Palestine | Falls                                           | 2 (1 to 3)   | 2 (2 to 3) | 14% (9.2% to 18%)         |
| 31 | Palestine | Fire, heat, and hot substances                  | 0 (0 to 0)   | 0 (0 to 0) | -3.3% (-13.4% to 6.4%)    |
| 32 | Palestine | Foreign body in eyes                            | 0 (0 to 0)   | 0 (0 to 0) | 0% (0% to 0%)             |
| 33 | Palestine | Foreign body in other body part                 | 0 (0 to 0)   | 0 (0 to 0) | 0.8% (-2.8% to 4.1%)      |
| 34 | Palestine | Motor vehicle road injuries                     | 0 (0 to 1)   | 0 (0 to 1) | -20.6% (-27.1% to -13.9%) |
| 35 | Palestine | Motorcyclist road injuries                      | 0 (0 to 0)   | 0 (0 to 0) | -14.3% (-24.3% to -3.7%)  |
| 36 | Palestine | Non-venomous animal contact                     | 0 (0 to 0)   | 0 (0 to 0) | -3.6% (-8.5% to 0.6%)     |
| 37 | Palestine | Other exposure to mechanical forces             | 0 (0 to 0)   | 0 (0 to 0) | 1% (-7.4% to 10%)         |
| 38 | Palestine | Other road injuries                             | 0 (0 to 0)   | 0 (0 to 0) | 2.1% (-7.3% to 13.3%)     |
| 39 | Palestine | Other transport injuries                        | 0 (0 to 0)   | 0 (0 to 0) | 5.9% (1.9% to 10.5%)      |
| 40 | Palestine | Other unintentional injuries                    | 0 (0 to 0)   | 0 (0 to 0) | -3.6% (-10.9% to 2.9%)    |
| 41 | Palestine | Pedestrian road injuries                        | 0 (0 to 0)   | 0 (0 to 0) | -16.6% (-24.2% to -8.2%)  |
| 42 | Palestine | Physical violence by firearm                    | 0 (0 to 0)   | 0 (0 to 0) | 402.2% (313.1% to 531.8%) |
| 43 | Palestine | Physical violence by other means                | 0 (0 to 0)   | 0 (0 to 0) | 89.9% (61.8% to 120.5%)   |
| 44 | Palestine | Physical violence by sharp object               | 0 (0 to 0)   | 0 (0 to 0) | 70.7% (43.1% to 101%)     |
| 45 |           |                                                 |              |            |                           |
| 46 |           |                                                 |              |            |                           |

|    |                  |                                                 |            |            |                           |
|----|------------------|-------------------------------------------------|------------|------------|---------------------------|
| 1  |                  |                                                 |            |            |                           |
| 2  | Palestine        | Poisoning by carbon monoxide                    | 0 (0 to 0) | 0 (0 to 0) | 61.6% (46.4% to 78.5%)    |
| 3  | Palestine        | Poisoning by other means                        | 0 (0 to 0) | 0 (0 to 0) | 9.2% (1% to 17.3%)        |
| 4  | Palestine        | Pulmonary aspiration and foreign body in airway | 0 (0 to 0) | 0 (0 to 0) | 0.5% (-6.5% to 7.7%)      |
| 5  | Palestine        | Self-harm by firearm                            | 0 (0 to 0) | 0 (0 to 0) | 25.1% (13.7% to 39.3%)    |
| 6  | Palestine        | Self-harm by other specified means              | 0 (0 to 0) | 0 (0 to 0) | 3.7% (-3% to 10.4%)       |
| 7  | Palestine        | Unintentional firearm injuries                  | 0 (0 to 0) | 0 (0 to 0) | -27.9% (-38.9% to -18.6%) |
| 8  | Palestine        | Venomous animal contact                         | 0 (0 to 0) | 0 (0 to 0) | -3.6% (-10.3% to 3.1%)    |
| 9  | Panama           | Adverse effects of medical treatment            | 0 (0 to 0) | 0 (0 to 0) | 0% (0% to 0%)             |
| 10 | Panama           | Conflict and terrorism                          | 0 (0 to 0) | 0 (0 to 0) | NA                        |
| 11 | Panama           | Cyclist road injuries                           | 0 (0 to 0) | 0 (0 to 0) | -29% (-36.9% to -20.8%)   |
| 12 | Panama           | Drowning                                        | 0 (0 to 0) | 0 (0 to 0) | 11.3% (-2.1% to 25.8%)    |
| 13 | Panama           | Environmental heat and cold exposure            | 0 (0 to 0) | 0 (0 to 0) | 3.2% (-0.7% to 8.2%)      |
| 14 | Panama           | Executions and police conflict                  | 0 (0 to 0) | 0 (0 to 0) | NA                        |
| 15 | Panama           | Exposure to forces of nature                    | 0 (0 to 0) | 0 (0 to 0) | NA                        |
| 16 | Panama           | Falls                                           | 2 (1 to 3) | 2 (1 to 3) | -2.6% (-7.5% to 2.4%)     |
| 17 | Panama           | Fire, heat, and hot substances                  | 0 (0 to 0) | 0 (0 to 0) | 0.7% (-4.4% to 7.1%)      |
| 18 | Panama           | Foreign body in eyes                            | 0 (0 to 0) | 0 (0 to 0) | 0% (0% to 0%)             |
| 19 | Panama           | Foreign body in other body part                 | 0 (0 to 0) | 0 (0 to 0) | -3.8% (-7.9% to 0.1%)     |
| 20 | Panama           | Motor vehicle road injuries                     | 1 (0 to 1) | 1 (0 to 1) | -16.9% (-23.9% to -8.6%)  |
| 21 | Panama           | Motorcyclist road injuries                      | 0 (0 to 0) | 0 (0 to 0) | 33% (19.7% to 48.5%)      |
| 22 | Panama           | Non-venomous animal contact                     | 0 (0 to 0) | 0 (0 to 0) | -24.3% (-29.5% to -19%)   |
| 23 | Panama           | Other exposure to mechanical forces             | 0 (0 to 1) | 0 (0 to 1) | -1.6% (-8.4% to 4.8%)     |
| 24 | Panama           | Other road injuries                             | 0 (0 to 0) | 0 (0 to 0) | -6.4% (-16.2% to 4.6%)    |
| 25 | Panama           | Other transport injuries                        | 0 (0 to 0) | 0 (0 to 0) | -1.3% (-5.4% to 3.1%)     |
| 26 | Panama           | Other unintentional injuries                    | 0 (0 to 0) | 0 (0 to 0) | -15.1% (-20.3% to -10.2%) |
| 27 | Panama           | Pedestrian road injuries                        | 0 (0 to 1) | 0 (0 to 0) | -35.4% (-42.9% to -28%)   |
| 28 | Panama           | Physical violence by firearm                    | 0 (0 to 0) | 0 (0 to 0) | 204% (139.9% to 302.5%)   |
| 29 | Panama           | Physical violence by other means                | 0 (0 to 0) | 0 (0 to 0) | 38.9% (17.8% to 62.8%)    |
| 30 | Panama           | Physical violence by sharp object               | 0 (0 to 0) | 0 (0 to 0) | 0.2% (-20.3% to 21.8%)    |
| 31 | Panama           | Poisoning by carbon monoxide                    | 0 (0 to 0) | 0 (0 to 0) | 42.6% (29% to 58.5%)      |
| 32 | Panama           | Poisoning by other means                        | 0 (0 to 0) | 0 (0 to 0) | 0.9% (-6.4% to 11.6%)     |
| 33 | Panama           | Pulmonary aspiration and foreign body in airway | 0 (0 to 0) | 0 (0 to 0) | -42% (-49.4% to -33.2%)   |
| 34 | Panama           | Self-harm by firearm                            | 0 (0 to 0) | 0 (0 to 0) | 8.7% (-4.5% to 23%)       |
| 35 | Panama           | Self-harm by other specified means              | 0 (0 to 0) | 0 (0 to 0) | 1% (-5.8% to 7.6%)        |
| 36 | Panama           | Unintentional firearm injuries                  | 0 (0 to 0) | 0 (0 to 0) | 11.9% (2.7% to 22.4%)     |
| 37 | Panama           | Venomous animal contact                         | 0 (0 to 0) | 0 (0 to 0) | -35.7% (-41.6% to -31.4%) |
| 38 | Papua New Guinea | Adverse effects of medical treatment            | 0 (0 to 0) | 0 (0 to 0) | 0% (0% to 0%)             |
| 39 | Papua New Guinea | Conflict and terrorism                          | 0 (0 to 1) | 0 (0 to 0) | NA                        |
| 40 | Papua New Guinea | Cyclist road injuries                           | 0 (0 to 0) | 0 (0 to 0) | 6.3% (-1% to 14.1%)       |
| 41 | Papua New Guinea | Drowning                                        | 0 (0 to 0) | 0 (0 to 0) | 5.9% (-3.4% to 15.6%)     |
| 42 | Papua New Guinea | Environmental heat and cold exposure            | 0 (0 to 0) | 0 (0 to 0) | -2.1% (-7.5% to 3.4%)     |
| 43 | Papua New Guinea | Executions and police conflict                  | 0 (0 to 0) | 0 (0 to 0) | NA                        |
| 44 | Papua New Guinea | Exposure to forces of nature                    | 0 (0 to 0) | 0 (0 to 0) | NA                        |
| 45 |                  |                                                 |            |            |                           |
| 46 |                  |                                                 |            |            |                           |

|    |                  |                                                 |            |            |                          |
|----|------------------|-------------------------------------------------|------------|------------|--------------------------|
| 1  |                  |                                                 |            |            |                          |
| 2  | Papua New Guinea | Falls                                           | 2 (1 to 2) | 2 (2 to 3) | 46.4% (39.8% to 53.3%)   |
| 3  | Papua New Guinea | Fire, heat, and hot substances                  | 0 (0 to 0) | 0 (0 to 0) | 1.1% (-4.1% to 6%)       |
| 4  | Papua New Guinea | Foreign body in eyes                            | 0 (0 to 0) | 0 (0 to 0) | 0% (0% to 0%)            |
| 5  | Papua New Guinea | Foreign body in other body part                 | 0 (0 to 0) | 0 (0 to 0) | -1.6% (-5.6% to 1.9%)    |
| 6  | Papua New Guinea | Motor vehicle road injuries                     | 1 (0 to 1) | 1 (0 to 1) | 0.3% (-6.6% to 7.8%)     |
| 7  | Papua New Guinea | Motorcyclist road injuries                      | 0 (0 to 0) | 0 (0 to 0) | 5.7% (-3.1% to 14.4%)    |
| 8  | Papua New Guinea | Non-venomous animal contact                     | 0 (0 to 0) | 0 (0 to 0) | -12% (-16.4% to -7.5%)   |
| 9  | Papua New Guinea | Other exposure to mechanical forces             | 0 (0 to 0) | 0 (0 to 0) | -6.1% (-12.5% to -0.2%)  |
| 10 | Papua New Guinea | Other road injuries                             | 0 (0 to 0) | 0 (0 to 0) | 5.1% (-5.4% to 15.5%)    |
| 11 | Papua New Guinea | Other transport injuries                        | 0 (0 to 0) | 0 (0 to 0) | -7.3% (-11.6% to -2.7%)  |
| 12 | Papua New Guinea | Other unintentional injuries                    | 0 (0 to 0) | 0 (0 to 0) | 1.3% (-3.9% to 6.2%)     |
| 13 | Papua New Guinea | Pedestrian road injuries                        | 0 (0 to 0) | 0 (0 to 0) | -4.9% (-13% to 3.1%)     |
| 14 | Papua New Guinea | Physical violence by firearm                    | 0 (0 to 0) | 0 (0 to 0) | 62.9% (48.9% to 77.2%)   |
| 15 | Papua New Guinea | Physical violence by other means                | 0 (0 to 1) | 1 (0 to 1) | 56.3% (45.5% to 66.9%)   |
| 16 | Papua New Guinea | Physical violence by sharp object               | 0 (0 to 0) | 0 (0 to 0) | 42.7% (29.5% to 55.2%)   |
| 17 | Papua New Guinea | Poisoning by carbon monoxide                    | 0 (0 to 0) | 0 (0 to 0) | 16.3% (4.9% to 28.9%)    |
| 18 | Papua New Guinea | Poisoning by other means                        | 0 (0 to 0) | 0 (0 to 0) | -9% (-14.8% to -2%)      |
| 19 | Papua New Guinea | Pulmonary aspiration and foreign body in airway | 0 (0 to 0) | 0 (0 to 0) | 3.2% (-7.7% to 14.6%)    |
| 20 | Papua New Guinea | Self-harm by firearm                            | 0 (0 to 0) | 0 (0 to 0) | -0.1% (-12.7% to 12.4%)  |
| 21 | Papua New Guinea | Self-harm by other specified means              | 0 (0 to 0) | 0 (0 to 0) | 5.3% (-1.1% to 12.3%)    |
| 22 | Papua New Guinea | Unintentional firearm injuries                  | 0 (0 to 0) | 0 (0 to 0) | -2.1% (-7.7% to 3.4%)    |
| 23 | Papua New Guinea | Venomous animal contact                         | 0 (0 to 0) | 0 (0 to 0) | -15.2% (-20.9% to -9.7%) |
| 24 | Paraguay         | Adverse effects of medical treatment            | 0 (0 to 0) | 0 (0 to 0) | 0% (0% to 0%)            |
| 25 | Paraguay         | Conflict and terrorism                          | 0 (0 to 0) | 0 (0 to 0) | NA                       |
| 26 | Paraguay         | Cyclist road injuries                           | 0 (0 to 0) | 0 (0 to 0) | -15.9% (-24.9% to -6%)   |
| 27 | Paraguay         | Drowning                                        | 0 (0 to 0) | 0 (0 to 0) | 10.8% (-1% to 22.6%)     |
| 28 | Paraguay         | Environmental heat and cold exposure            | 0 (0 to 0) | 0 (0 to 0) | 11.1% (6.6% to 16.5%)    |
| 29 | Paraguay         | Executions and police conflict                  | 0 (0 to 0) | 0 (0 to 0) | NA                       |
| 30 | Paraguay         | Exposure to forces of nature                    | 0 (0 to 0) | 0 (0 to 0) | NA                       |
| 31 | Paraguay         | Falls                                           | 2 (2 to 3) | 2 (2 to 3) | 5.4% (1.4% to 9.5%)      |
| 32 | Paraguay         | Fire, heat, and hot substances                  | 0 (0 to 0) | 0 (0 to 0) | -2.8% (-6.7% to 1.5%)    |
| 33 | Paraguay         | Foreign body in eyes                            | 0 (0 to 0) | 0 (0 to 0) | 0% (0% to 0%)            |
| 34 | Paraguay         | Foreign body in other body part                 | 0 (0 to 0) | 0 (0 to 0) | -2.2% (-6.8% to 2.5%)    |
| 35 | Paraguay         | Motor vehicle road injuries                     | 0 (0 to 0) | 0 (0 to 0) | 7.1% (-5.9% to 20.2%)    |
| 36 | Paraguay         | Motorcyclist road injuries                      | 0 (0 to 1) | 1 (0 to 1) | 59.1% (39.4% to 83.3%)   |
| 37 | Paraguay         | Non-venomous animal contact                     | 0 (0 to 0) | 0 (0 to 0) | -14.3% (-18.9% to -9.1%) |
| 38 | Paraguay         | Other exposure to mechanical forces             | 0 (0 to 0) | 0 (0 to 0) | -1.4% (-8.4% to 6.4%)    |
| 39 | Paraguay         | Other road injuries                             | 0 (0 to 0) | 0 (0 to 0) | -11.1% (-21.2% to 0.9%)  |
| 40 | Paraguay         | Other transport injuries                        | 0 (0 to 0) | 0 (0 to 0) | -5.1% (-8.6% to -1.4%)   |
| 41 | Paraguay         | Other unintentional injuries                    | 0 (0 to 0) | 0 (0 to 0) | -8.9% (-13.2% to -4.3%)  |
| 42 | Paraguay         | Pedestrian road injuries                        | 0 (0 to 0) | 0 (0 to 0) | -2.6% (-13.9% to 9.8%)   |
| 43 | Paraguay         | Physical violence by firearm                    | 0 (0 to 0) | 0 (0 to 0) | 31.8% (14.4% to 54.3%)   |
| 44 | Paraguay         | Physical violence by other means                | 0 (0 to 0) | 0 (0 to 0) | -5.7% (-14.8% to 3.7%)   |
| 45 |                  |                                                 |            |            |                          |
| 46 |                  |                                                 |            |            |                          |

|    |             |                                                 |             |            |                           |
|----|-------------|-------------------------------------------------|-------------|------------|---------------------------|
| 1  |             |                                                 |             |            |                           |
| 2  | Paraguay    | Physical violence by sharp object               | 0 (0 to 0)  | 0 (0 to 0) | -14.1% (-25.4% to -3.2%)  |
| 3  | Paraguay    | Poisoning by carbon monoxide                    | 0 (0 to 0)  | 0 (0 to 0) | 19.7% (8.5% to 31.3%)     |
| 4  | Paraguay    | Poisoning by other means                        | 0 (0 to 0)  | 0 (0 to 0) | -16.9% (-22.5% to -11.8%) |
| 5  | Paraguay    | Pulmonary aspiration and foreign body in airway | 0 (0 to 0)  | 0 (0 to 0) | -34.6% (-41.7% to -27%)   |
| 6  | Paraguay    | Self-harm by firearm                            | 0 (0 to 0)  | 0 (0 to 0) | 46.5% (31.5% to 63.7%)    |
| 7  | Paraguay    | Self-harm by other specified means              | 0 (0 to 0)  | 0 (0 to 0) | 63.3% (50.9% to 83.3%)    |
| 8  | Paraguay    | Unintentional firearm injuries                  | 0 (0 to 0)  | 0 (0 to 0) | -20.8% (-28.8% to -13.4%) |
| 9  | Peru        | Venomous animal contact                         | 0 (0 to 0)  | 0 (0 to 0) | -13.4% (-17.9% to -8.1%)  |
| 10 | Peru        | Adverse effects of medical treatment            | 0 (0 to 0)  | 0 (0 to 0) | 0% (0% to 0%)             |
| 11 | Peru        | Conflict and terrorism                          | 6 (1 to 17) | 0 (0 to 0) | NA                        |
| 12 | Peru        | Cyclist road injuries                           | 0 (0 to 0)  | 0 (0 to 0) | 0.5% (-8.1% to 9.8%)      |
| 13 | Peru        | Drowning                                        | 0 (0 to 0)  | 0 (0 to 0) | 33.8% (13.1% to 53.3%)    |
| 14 | Peru        | Environmental heat and cold exposure            | 0 (0 to 0)  | 0 (0 to 0) | -4.3% (-8.3% to -0.1%)    |
| 15 | Peru        | Executions and police conflict                  | 0 (0 to 0)  | 0 (0 to 0) | NA                        |
| 16 | Peru        | Exposure to forces of nature                    | 0 (0 to 1)  | 0 (0 to 0) | NA                        |
| 17 | Peru        | Falls                                           | 1 (1 to 2)  | 2 (1 to 2) | 50.3% (44.9% to 56%)      |
| 18 | Peru        | Fire, heat, and hot substances                  | 0 (0 to 0)  | 0 (0 to 0) | -11.4% (-18.9% to -4.7%)  |
| 19 | Peru        | Foreign body in eyes                            | 0 (0 to 0)  | 0 (0 to 0) | 0% (0% to 0%)             |
| 20 | Peru        | Foreign body in other body part                 | 0 (0 to 1)  | 0 (0 to 0) | -30.7% (-37.1% to -24.5%) |
| 21 | Peru        | Motor vehicle road injuries                     | 0 (0 to 1)  | 0 (0 to 0) | -12.7% (-20.1% to -4.8%)  |
| 22 | Peru        | Motorcyclist road injuries                      | 0 (0 to 0)  | 0 (0 to 0) | 25.2% (14.8% to 39.2%)    |
| 23 | Peru        | Non-venomous animal contact                     | 0 (0 to 0)  | 0 (0 to 0) | -9.2% (-13.5% to -4.9%)   |
| 24 | Peru        | Other exposure to mechanical forces             | 0 (0 to 0)  | 0 (0 to 1) | 10% (1.2% to 20.9%)       |
| 25 | Peru        | Other road injuries                             | 0 (0 to 0)  | 0 (0 to 0) | -0.5% (-9.6% to 10.2%)    |
| 26 | Peru        | Other transport injuries                        | 0 (0 to 0)  | 0 (0 to 0) | 3% (-1.7% to 8.4%)        |
| 27 | Peru        | Other unintentional injuries                    | 0 (0 to 0)  | 0 (0 to 0) | -28.6% (-34.5% to -23.1%) |
| 28 | Peru        | Pedestrian road injuries                        | 0 (0 to 0)  | 0 (0 to 0) | -16.4% (-23.9% to -8.5%)  |
| 29 | Peru        | Physical violence by firearm                    | 0 (0 to 0)  | 0 (0 to 0) | 73.3% (48.7% to 103.9%)   |
| 30 | Peru        | Physical violence by other means                | 0 (0 to 0)  | 0 (0 to 0) | -28% (-36.9% to -20.1%)   |
| 31 | Peru        | Physical violence by sharp object               | 0 (0 to 0)  | 0 (0 to 0) | -17.3% (-27.1% to -7.5%)  |
| 32 | Peru        | Poisoning by carbon monoxide                    | 0 (0 to 0)  | 0 (0 to 0) | 44.5% (26.2% to 63.7%)    |
| 33 | Peru        | Poisoning by other means                        | 0 (0 to 0)  | 0 (0 to 0) | -7.6% (-16.3% to 1.3%)    |
| 34 | Peru        | Pulmonary aspiration and foreign body in airway | 0 (0 to 0)  | 0 (0 to 0) | -63.9% (-69.5% to -57.4%) |
| 35 | Peru        | Self-harm by firearm                            | 0 (0 to 0)  | 0 (0 to 0) | 32.7% (19.6% to 52.5%)    |
| 36 | Peru        | Self-harm by other specified means              | 0 (0 to 0)  | 0 (0 to 0) | -4% (-12.8% to 5.1%)      |
| 37 | Peru        | Unintentional firearm injuries                  | 0 (0 to 0)  | 0 (0 to 0) | -15.3% (-24.9% to -7.4%)  |
| 38 | Peru        | Venomous animal contact                         | 0 (0 to 0)  | 0 (0 to 0) | -9.3% (-14% to -4.6%)     |
| 39 | Philippines | Adverse effects of medical treatment            | 0 (0 to 0)  | 0 (0 to 0) | 0% (0% to 0%)             |
| 40 | Philippines | Conflict and terrorism                          | 1 (0 to 4)  | 0 (0 to 1) | NA                        |
| 41 | Philippines | Cyclist road injuries                           | 0 (0 to 0)  | 0 (0 to 0) | -10.1% (-14.6% to -5.7%)  |
| 42 | Philippines | Drowning                                        | 0 (0 to 0)  | 0 (0 to 0) | -37.2% (-40.7% to -33.5%) |
| 43 | Philippines | Environmental heat and cold exposure            | 0 (0 to 0)  | 0 (0 to 0) | -9.2% (-11.1% to -7.5%)   |
| 44 | Philippines | Executions and police conflict                  | 0 (0 to 0)  | 0 (0 to 0) | NA                        |
| 45 |             |                                                 |             |            |                           |
| 46 |             |                                                 |             |            |                           |

|    |             |                                                 |            |            |                           |
|----|-------------|-------------------------------------------------|------------|------------|---------------------------|
| 1  |             |                                                 |            |            |                           |
| 2  | Philippines | Exposure to forces of nature                    | 2 (1 to 4) | 0 (0 to 0) | NA                        |
| 3  | Philippines | Falls                                           | 1 (1 to 2) | 2 (1 to 2) | 24.3% (21.5% to 26.8%)    |
| 4  | Philippines | Fire, heat, and hot substances                  | 0 (0 to 0) | 0 (0 to 0) | -3.8% (-6.6% to -1.7%)    |
| 5  | Philippines | Foreign body in eyes                            | 0 (0 to 0) | 0 (0 to 0) | 0% (0% to 0%)             |
| 6  | Philippines | Foreign body in other body part                 | 0 (0 to 0) | 0 (0 to 0) | -7.1% (-9.7% to -4.5%)    |
| 7  | Philippines | Motor vehicle road injuries                     | 0 (0 to 1) | 0 (0 to 1) | -5.5% (-9.5% to -2.2%)    |
| 8  | Philippines | Motorcyclist road injuries                      | 0 (0 to 1) | 0 (0 to 1) | 19.6% (15% to 25.3%)      |
| 9  | Philippines | Non-venomous animal contact                     | 0 (0 to 0) | 0 (0 to 0) | -11.2% (-13.5% to -8.5%)  |
| 10 | Philippines | Other exposure to mechanical forces             | 0 (0 to 0) | 0 (0 to 0) | -15.3% (-25.2% to -6.8%)  |
| 11 | Philippines | Other road injuries                             | 0 (0 to 0) | 0 (0 to 0) | -13.2% (-17.2% to -8.9%)  |
| 12 | Philippines | Other transport injuries                        | 0 (0 to 0) | 0 (0 to 0) | -8% (-10.2% to -5.8%)     |
| 13 | Philippines | Other unintentional injuries                    | 0 (0 to 0) | 0 (0 to 0) | -14.5% (-16.7% to -12.6%) |
| 14 | Philippines | Pedestrian road injuries                        | 0 (0 to 0) | 0 (0 to 0) | -21.6% (-25% to -18.2%)   |
| 15 | Philippines | Physical violence by firearm                    | 0 (0 to 0) | 0 (0 to 0) | -5.4% (-10.6% to 0.7%)    |
| 16 | Philippines | Physical violence by other means                | 0 (0 to 1) | 0 (0 to 1) | -27% (-30.8% to -23.4%)   |
| 17 | Philippines | Physical violence by sharp object               | 1 (0 to 1) | 0 (0 to 1) | -24.3% (-27.5% to -21.3%) |
| 18 | Philippines | Poisoning by carbon monoxide                    | 0 (0 to 0) | 0 (0 to 0) | 14.9% (11% to 19.3%)      |
| 19 | Philippines | Poisoning by other means                        | 0 (0 to 0) | 0 (0 to 0) | 15.1% (10.6% to 19.8%)    |
| 20 | Philippines | Pulmonary aspiration and foreign body in airway | 0 (0 to 0) | 0 (0 to 0) | -33.6% (-36.3% to -30.3%) |
| 21 | Philippines | Self-harm by firearm                            | 0 (0 to 0) | 0 (0 to 0) | -11% (-20.5% to -1.3%)    |
| 22 | Philippines | Self-harm by other specified means              | 0 (0 to 0) | 0 (0 to 0) | -10.9% (-12.3% to -9.4%)  |
| 23 | Philippines | Unintentional firearm injuries                  | 0 (0 to 0) | 0 (0 to 0) | 43.3% (29.5% to 59.6%)    |
| 24 | Philippines | Venomous animal contact                         | 0 (0 to 0) | 0 (0 to 0) | -44.6% (-48.8% to -41.4%) |
| 25 | Poland      | Adverse effects of medical treatment            | 0 (0 to 0) | 0 (0 to 0) | 0% (0% to 0%)             |
| 26 | Poland      | Conflict and terrorism                          | 0 (0 to 0) | 0 (0 to 0) | NA                        |
| 27 | Poland      | Cyclist road injuries                           | 1 (0 to 1) | 1 (0 to 1) | -17.7% (-21.5% to -13.1%) |
| 28 | Poland      | Drowning                                        | 0 (0 to 0) | 0 (0 to 0) | -7.6% (-17.2% to 2.2%)    |
| 29 | Poland      | Environmental heat and cold exposure            | 0 (0 to 0) | 0 (0 to 0) | -61.1% (-69.6% to -51.1%) |
| 30 | Poland      | Executions and police conflict                  | 0 (0 to 0) | 0 (0 to 0) | NA                        |
| 31 | Poland      | Exposure to forces of nature                    | 0 (0 to 0) | 0 (0 to 0) | NA                        |
| 32 | Poland      | Falls                                           | 6 (4 to 9) | 7 (5 to 9) | 10.8% (7.1% to 14.7%)     |
| 33 | Poland      | Fire, heat, and hot substances                  | 0 (0 to 0) | 0 (0 to 0) | -11.9% (-14.7% to -8.9%)  |
| 34 | Poland      | Foreign body in eyes                            | 0 (0 to 0) | 0 (0 to 0) | 0% (0% to 0%)             |
| 35 | Poland      | Foreign body in other body part                 | 0 (0 to 1) | 0 (0 to 1) | -6.3% (-8.2% to -4.6%)    |
| 36 | Poland      | Motor vehicle road injuries                     | 2 (1 to 3) | 2 (1 to 3) | -16.2% (-20.2% to -11.6%) |
| 37 | Poland      | Motorcyclist road injuries                      | 0 (0 to 1) | 0 (0 to 1) | -24.3% (-28.8% to -19.3%) |
| 38 | Poland      | Non-venomous animal contact                     | 0 (0 to 0) | 0 (0 to 0) | -22.8% (-24.5% to -21.3%) |
| 39 | Poland      | Other exposure to mechanical forces             | 2 (1 to 3) | 1 (1 to 3) | -11.3% (-14.4% to -8.1%)  |
| 40 | Poland      | Other road injuries                             | 0 (0 to 0) | 0 (0 to 0) | -42.6% (-49.2% to -36.7%) |
| 41 | Poland      | Other transport injuries                        | 0 (0 to 0) | 0 (0 to 0) | -31.6% (-34.5% to -29.1%) |
| 42 | Poland      | Other unintentional injuries                    | 1 (0 to 1) | 0 (0 to 0) | -38.7% (-43.1% to -34.6%) |
| 43 | Poland      | Pedestrian road injuries                        | 1 (0 to 1) | 0 (0 to 1) | -62% (-64.7% to -59.4%)   |
| 44 | Poland      | Physical violence by firearm                    | 0 (0 to 0) | 0 (0 to 0) | 49.4% (36.7% to 64.9%)    |
| 45 |             |                                                 |            |            |                           |
| 46 |             |                                                 |            |            |                           |



|    |             |                                                 |            |            |                           |
|----|-------------|-------------------------------------------------|------------|------------|---------------------------|
| 1  |             |                                                 |            |            |                           |
| 2  | Poland      | Physical violence by other means                | 0 (0 to 1) | 0 (0 to 1) | -30.3% (-35.3% to -25.2%) |
| 3  | Poland      | Physical violence by sharp object               | 0 (0 to 0) | 0 (0 to 0) | -41.9% (-48.8% to -34.4%) |
| 4  | Poland      | Poisoning by carbon monoxide                    | 0 (0 to 0) | 0 (0 to 0) | -7.2% (-19.8% to 5.5%)    |
| 5  | Poland      | Poisoning by other means                        | 0 (0 to 0) | 0 (0 to 0) | -21.4% (-30.7% to -11.2%) |
| 6  | Poland      | Pulmonary aspiration and foreign body in airway | 0 (0 to 0) | 0 (0 to 0) | -32.4% (-38.1% to -27.3%) |
| 7  | Poland      | Self-harm by firearm                            | 0 (0 to 0) | 0 (0 to 0) | 5.1% (0.3% to 11.5%)      |
| 8  | Poland      | Self-harm by other specified means              | 0 (0 to 1) | 0 (0 to 1) | -4.5% (-7.6% to -1.2%)    |
| 9  | Poland      | Unintentional firearm injuries                  | 0 (0 to 0) | 0 (0 to 0) | 1.7% (-2.4% to 5.7%)      |
| 10 | Poland      | Venomous animal contact                         | 0 (0 to 0) | 0 (0 to 0) | -19.7% (-21.5% to -17.7%) |
| 11 | Portugal    | Adverse effects of medical treatment            | 0 (0 to 0) | 0 (0 to 0) | 0% (0% to 0%)             |
| 12 | Portugal    | Conflict and terrorism                          | 0 (0 to 0) | 0 (0 to 0) | NA                        |
| 13 | Portugal    | Cyclist road injuries                           | 0 (0 to 1) | 0 (0 to 0) | -52.9% (-59.8% to -45.2%) |
| 14 | Portugal    | Drowning                                        | 0 (0 to 0) | 0 (0 to 0) | 53% (34.2% to 73.4%)      |
| 15 | Portugal    | Environmental heat and cold exposure            | 0 (0 to 0) | 0 (0 to 0) | -4.1% (-8.6% to 0.9%)     |
| 16 | Portugal    | Executions and police conflict                  | 0 (0 to 0) | 0 (0 to 0) | NA                        |
| 17 | Portugal    | Exposure to forces of nature                    | 0 (0 to 0) | 0 (0 to 0) | NA                        |
| 18 | Portugal    | Falls                                           | 4 (3 to 5) | 4 (3 to 5) | -9.8% (-15.5% to -4.4%)   |
| 19 | Portugal    | Fire, heat, and hot substances                  | 0 (0 to 0) | 0 (0 to 0) | -17.2% (-23.4% to -11.7%) |
| 20 | Portugal    | Foreign body in eyes                            | 0 (0 to 0) | 0 (0 to 0) | 0% (0% to 0%)             |
| 21 | Portugal    | Foreign body in other body part                 | 0 (0 to 0) | 0 (0 to 0) | 7.5% (1.5% to 12.6%)      |
| 22 | Portugal    | Motor vehicle road injuries                     | 1 (0 to 1) | 0 (0 to 0) | -60.8% (-67.3% to -54%)   |
| 23 | Portugal    | Motorcyclist road injuries                      | 0 (0 to 0) | 0 (0 to 0) | -26.5% (-39.6% to -11.8%) |
| 24 | Portugal    | Non-venomous animal contact                     | 0 (0 to 0) | 0 (0 to 0) | -3.7% (-8.6% to 1.7%)     |
| 25 | Portugal    | Other exposure to mechanical forces             | 1 (0 to 1) | 0 (0 to 1) | -29.3% (-38.7% to -20.4%) |
| 26 | Portugal    | Other road injuries                             | 0 (0 to 0) | 0 (0 to 0) | -40.2% (-50.4% to -30.1%) |
| 27 | Portugal    | Other transport injuries                        | 0 (0 to 0) | 0 (0 to 0) | 2.3% (-3.9% to 8.7%)      |
| 28 | Portugal    | Other unintentional injuries                    | 0 (0 to 0) | 0 (0 to 0) | -27.9% (-33.7% to -22.4%) |
| 29 | Portugal    | Pedestrian road injuries                        | 0 (0 to 1) | 0 (0 to 0) | -84.9% (-88.1% to -81.1%) |
| 30 | Portugal    | Physical violence by firearm                    | 0 (0 to 0) | 0 (0 to 0) | 12.2% (-4.3% to 34%)      |
| 31 | Portugal    | Physical violence by other means                | 0 (0 to 0) | 0 (0 to 0) | -45.7% (-53.5% to -38.3%) |
| 32 | Portugal    | Physical violence by sharp object               | 0 (0 to 0) | 0 (0 to 0) | -30.5% (-41.4% to -18.6%) |
| 33 | Portugal    | Poisoning by carbon monoxide                    | 0 (0 to 0) | 0 (0 to 0) | 37.3% (26.3% to 49.5%)    |
| 34 | Portugal    | Poisoning by other means                        | 0 (0 to 0) | 0 (0 to 0) | -8.2% (-14.3% to -1.4%)   |
| 35 | Portugal    | Pulmonary aspiration and foreign body in airway | 0 (0 to 0) | 0 (0 to 0) | -24.6% (-32.4% to -15.8%) |
| 36 | Portugal    | Self-harm by firearm                            | 0 (0 to 0) | 0 (0 to 0) | 7.2% (-6.7% to 26.8%)     |
| 37 | Portugal    | Self-harm by other specified means              | 0 (0 to 0) | 0 (0 to 0) | -33.1% (-38% to -28%)     |
| 38 | Portugal    | Unintentional firearm injuries                  | 0 (0 to 0) | 0 (0 to 0) | -23% (-34% to -12.8%)     |
| 39 | Portugal    | Venomous animal contact                         | 0 (0 to 0) | 0 (0 to 0) | -3% (-9.8% to 5.4%)       |
| 40 | Puerto Rico | Adverse effects of medical treatment            | 0 (0 to 0) | 0 (0 to 0) | 0% (0% to 0%)             |
| 41 | Puerto Rico | Conflict and terrorism                          | 0 (0 to 0) | 0 (0 to 0) | NA                        |
| 42 | Puerto Rico | Cyclist road injuries                           | 1 (0 to 2) | 1 (0 to 1) | -23.4% (-32.9% to -12.7%) |
| 43 | Puerto Rico | Drowning                                        | 0 (0 to 0) | 0 (0 to 0) | 64.7% (45.4% to 85.6%)    |
| 44 | Puerto Rico | Environmental heat and cold exposure            | 0 (0 to 0) | 0 (0 to 0) | 3.4% (-0.9% to 7.3%)      |
| 45 |             |                                                 |            |            |                           |
| 46 |             |                                                 |            |            |                           |

|    |             |                                                 |            |             |                           |
|----|-------------|-------------------------------------------------|------------|-------------|---------------------------|
| 1  |             |                                                 |            |             |                           |
| 2  | Puerto Rico | Executions and police conflict                  | 0 (0 to 0) | 0 (0 to 0)  | NA                        |
| 3  | Puerto Rico | Exposure to forces of nature                    | 0 (0 to 0) | 0 (0 to 0)  | NA                        |
| 4  | Puerto Rico | Falls                                           | 6 (4 to 8) | 8 (5 to 11) | 36.8% (31.9% to 42%)      |
| 5  | Puerto Rico | Fire, heat, and hot substances                  | 0 (0 to 0) | 0 (0 to 0)  | 1.1% (-4.7% to 7.2%)      |
| 6  | Puerto Rico | Foreign body in eyes                            | 0 (0 to 0) | 0 (0 to 0)  | 0% (0% to 0%)             |
| 7  | Puerto Rico | Foreign body in other body part                 | 0 (0 to 0) | 0 (0 to 0)  | 3.4% (-1.1% to 8.3%)      |
| 8  | Puerto Rico | Motor vehicle road injuries                     | 1 (1 to 3) | 1 (0 to 1)  | -49.4% (-56.7% to -41.7%) |
| 9  | Puerto Rico | Motorcyclist road injuries                      | 1 (0 to 1) | 1 (0 to 1)  | 33.9% (14.3% to 59%)      |
| 10 | Puerto Rico | Non-venomous animal contact                     | 0 (0 to 0) | 0 (0 to 0)  | -9.6% (-14% to -5.3%)     |
| 11 | Puerto Rico | Other exposure to mechanical forces             | 0 (0 to 1) | 1 (0 to 1)  | 15.6% (9.9% to 20.6%)     |
| 12 | Puerto Rico | Other road injuries                             | 0 (0 to 0) | 0 (0 to 0)  | -20% (-30.1% to -7.4%)    |
| 13 | Puerto Rico | Other transport injuries                        | 0 (0 to 0) | 0 (0 to 0)  | 0.1% (-5.5% to 6%)        |
| 14 | Puerto Rico | Other unintentional injuries                    | 0 (0 to 1) | 0 (0 to 1)  | -5.3% (-11.6% to -0.3%)   |
| 15 | Puerto Rico | Pedestrian road injuries                        | 1 (1 to 2) | 1 (0 to 1)  | -48.2% (-54.8% to -40.9%) |
| 16 | Puerto Rico | Physical violence by firearm                    | 0 (0 to 0) | 0 (0 to 1)  | 25.8% (3.3% to 60.7%)     |
| 17 | Puerto Rico | Physical violence by other means                | 0 (0 to 1) | 0 (0 to 0)  | -18.3% (-28% to -7.2%)    |
| 18 | Puerto Rico | Physical violence by sharp object               | 0 (0 to 0) | 0 (0 to 0)  | -26.3% (-37.9% to -12.4%) |
| 19 | Puerto Rico | Poisoning by carbon monoxide                    | 0 (0 to 0) | 0 (0 to 0)  | -18.5% (-32% to -5.5%)    |
| 20 | Puerto Rico | Poisoning by other means                        | 0 (0 to 0) | 0 (0 to 0)  | -41.4% (-51.1% to -32%)   |
| 21 | Puerto Rico | Pulmonary aspiration and foreign body in airway | 0 (0 to 0) | 0 (0 to 0)  | -17.4% (-24.1% to -8.3%)  |
| 22 | Puerto Rico | Self-harm by firearm                            | 0 (0 to 0) | 0 (0 to 0)  | -32.7% (-43.6% to -23.3%) |
| 23 | Puerto Rico | Self-harm by other specified means              | 0 (0 to 0) | 0 (0 to 0)  | -17.1% (-25% to -8.8%)    |
| 24 | Puerto Rico | Unintentional firearm injuries                  | 0 (0 to 0) | 0 (0 to 0)  | 15.8% (4.6% to 27.3%)     |
| 25 | Puerto Rico | Venomous animal contact                         | 0 (0 to 0) | 0 (0 to 0)  | -9.4% (-15% to -3.9%)     |
| 26 | Qatar       | Adverse effects of medical treatment            | 0 (0 to 0) | 0 (0 to 0)  | 0% (0% to 0%)             |
| 27 | Qatar       | Conflict and terrorism                          | 0 (0 to 0) | 0 (0 to 0)  | NA                        |
| 28 | Qatar       | Cyclist road injuries                           | 0 (0 to 0) | 0 (0 to 0)  | -35.3% (-42.6% to -27.1%) |
| 29 | Qatar       | Drowning                                        | 0 (0 to 0) | 0 (0 to 0)  | 80.9% (54.1% to 109.8%)   |
| 30 | Qatar       | Environmental heat and cold exposure            | 0 (0 to 0) | 0 (0 to 0)  | -6.3% (-11.8% to -0.9%)   |
| 31 | Qatar       | Executions and police conflict                  | 0 (0 to 0) | 0 (0 to 0)  | NA                        |
| 32 | Qatar       | Exposure to forces of nature                    | 0 (0 to 0) | 0 (0 to 0)  | NA                        |
| 33 | Qatar       | Falls                                           | 3 (2 to 4) | 4 (3 to 5)  | 24.3% (18.5% to 30.3%)    |
| 34 | Qatar       | Fire, heat, and hot substances                  | 0 (0 to 0) | 0 (0 to 0)  | -33% (-39.3% to -26.3%)   |
| 35 | Qatar       | Foreign body in eyes                            | 0 (0 to 0) | 0 (0 to 0)  | 0% (0% to 0%)             |
| 36 | Qatar       | Foreign body in other body part                 | 0 (0 to 0) | 0 (0 to 0)  | 0.7% (-2.9% to 4.9%)      |
| 37 | Qatar       | Motor vehicle road injuries                     | 1 (1 to 2) | 1 (0 to 1)  | -30.9% (-36.8% to -24.6%) |
| 38 | Qatar       | Motorcyclist road injuries                      | 0 (0 to 0) | 0 (0 to 0)  | -30.3% (-38.7% to -20.1%) |
| 39 | Qatar       | Non-venomous animal contact                     | 0 (0 to 0) | 0 (0 to 0)  | -1.2% (-6% to 4.2%)       |
| 40 | Qatar       | Other exposure to mechanical forces             | 1 (0 to 1) | 0 (0 to 1)  | -27.1% (-33.5% to -21.6%) |
| 41 | Qatar       | Other road injuries                             | 0 (0 to 0) | 0 (0 to 0)  | -14.1% (-24.2% to -2.8%)  |
| 42 | Qatar       | Other transport injuries                        | 0 (0 to 0) | 0 (0 to 0)  | -22% (-28.4% to -15.7%)   |
| 43 | Qatar       | Other unintentional injuries                    | 0 (0 to 0) | 0 (0 to 0)  | -13.9% (-19.2% to -8.3%)  |
| 44 | Qatar       | Pedestrian road injuries                        | 0 (0 to 1) | 0 (0 to 0)  | -40.8% (-47.1% to -33%)   |
| 45 |             |                                                 |            |             |                           |
| 46 |             |                                                 |            |             |                           |

|    |                     |                                                 |            |            |                           |
|----|---------------------|-------------------------------------------------|------------|------------|---------------------------|
| 1  |                     |                                                 |            |            |                           |
| 2  | Qatar               | Physical violence by firearm                    | 0 (0 to 0) | 0 (0 to 0) | 126.5% (94% to 169.6%)    |
| 3  | Qatar               | Physical violence by other means                | 0 (0 to 0) | 0 (0 to 0) | -2.2% (-12.8% to 6.2%)    |
| 4  | Qatar               | Physical violence by sharp object               | 0 (0 to 0) | 0 (0 to 0) | 3.1% (-8.4% to 16%)       |
| 5  | Qatar               | Poisoning by carbon monoxide                    | 0 (0 to 0) | 0 (0 to 0) | 38.3% (25.3% to 53.8%)    |
| 6  | Qatar               | Poisoning by other means                        | 0 (0 to 0) | 0 (0 to 0) | -9.4% (-15.6% to -2.8%)   |
| 7  | Qatar               | Pulmonary aspiration and foreign body in airway | 0 (0 to 0) | 0 (0 to 0) | -18.7% (-28.1% to -7.3%)  |
| 8  | Qatar               | Self-harm by firearm                            | 0 (0 to 0) | 0 (0 to 0) | 33.7% (17% to 56.8%)      |
| 9  | Qatar               | Self-harm by other specified means              | 0 (0 to 0) | 0 (0 to 0) | -4.7% (-11.9% to 2.5%)    |
| 10 | Qatar               | Unintentional firearm injuries                  | 0 (0 to 0) | 0 (0 to 0) | -1.8% (-10.9% to 9.3%)    |
| 11 | Republic of Korea   | Venomous animal contact                         | 0 (0 to 0) | 0 (0 to 0) | -1.7% (-8.1% to 6.5%)     |
| 12 | Republic of Korea   | Adverse effects of medical treatment            | 0 (0 to 0) | 0 (0 to 0) | 0% (0% to 0%)             |
| 13 | Republic of Korea   | Conflict and terrorism                          | 0 (0 to 0) | 0 (0 to 0) | NA                        |
| 14 | Republic of Korea   | Cyclist road injuries                           | 0 (0 to 1) | 0 (0 to 0) | -41.4% (-49.3% to -32.3%) |
| 15 | Republic of Korea   | Drowning                                        | 0 (0 to 0) | 0 (0 to 0) | 153.6% (124.1% to 187.2%) |
| 16 | Republic of Korea   | Environmental heat and cold exposure            | 0 (0 to 0) | 0 (0 to 0) | -8.8% (-14% to -3.7%)     |
| 17 | Republic of Korea   | Executions and police conflict                  | 0 (0 to 0) | 0 (0 to 0) | NA                        |
| 18 | Republic of Korea   | Exposure to forces of nature                    | 0 (0 to 0) | 0 (0 to 0) | NA                        |
| 19 | Republic of Korea   | Falls                                           | 5 (3 to 6) | 5 (4 to 7) | 15.2% (8.7% to 21.5%)     |
| 20 | Republic of Korea   | Fire, heat, and hot substances                  | 0 (0 to 0) | 0 (0 to 0) | -15% (-22.7% to -8.1%)    |
| 21 | Republic of Korea   | Foreign body in eyes                            | 0 (0 to 0) | 0 (0 to 0) | 0% (0% to 0%)             |
| 22 | Republic of Korea   | Foreign body in other body part                 | 0 (0 to 1) | 0 (0 to 1) | 9.3% (5.9% to 12.9%)      |
| 23 | Republic of Korea   | Motor vehicle road injuries                     | 1 (0 to 1) | 0 (0 to 1) | -46.3% (-52.8% to -38.4%) |
| 24 | Republic of Korea   | Motorcyclist road injuries                      | 0 (0 to 1) | 0 (0 to 0) | -51.4% (-58.8% to -42.9%) |
| 25 | Republic of Korea   | Non-venomous animal contact                     | 0 (0 to 0) | 0 (0 to 0) | -9.3% (-13.4% to -4.7%)   |
| 26 | Republic of Korea   | Other exposure to mechanical forces             | 1 (0 to 2) | 1 (0 to 2) | -2.8% (-11.6% to 5.7%)    |
| 27 | Republic of Korea   | Other road injuries                             | 0 (0 to 0) | 0 (0 to 0) | -32.2% (-43.4% to -19.6%) |
| 28 | Republic of Korea   | Other transport injuries                        | 0 (0 to 1) | 0 (0 to 0) | -32% (-38.4% to -24.6%)   |
| 29 | Republic of Korea   | Other unintentional injuries                    | 1 (0 to 1) | 0 (0 to 1) | -30.3% (-37.3% to -23.2%) |
| 30 | Republic of Korea   | Pedestrian road injuries                        | 0 (0 to 0) | 0 (0 to 0) | -60.6% (-65.7% to -55.2%) |
| 31 | Republic of Korea   | Physical violence by firearm                    | 0 (0 to 0) | 0 (0 to 0) | 90.4% (61.5% to 128.6%)   |
| 32 | Republic of Korea   | Physical violence by other means                | 0 (0 to 0) | 0 (0 to 0) | -13.8% (-24% to -3.9%)    |
| 33 | Republic of Korea   | Physical violence by sharp object               | 0 (0 to 0) | 0 (0 to 0) | -39.9% (-51% to -29.5%)   |
| 34 | Republic of Korea   | Poisoning by carbon monoxide                    | 0 (0 to 0) | 0 (0 to 0) | -27.7% (-39.7% to -13.9%) |
| 35 | Republic of Korea   | Poisoning by other means                        | 0 (0 to 0) | 0 (0 to 0) | -26.1% (-35.7% to -15.8%) |
| 36 | Republic of Korea   | Pulmonary aspiration and foreign body in airway | 0 (0 to 0) | 0 (0 to 0) | -41.6% (-48.1% to -35.1%) |
| 37 | Republic of Korea   | Self-harm by firearm                            | 0 (0 to 0) | 0 (0 to 0) | 74.3% (40% to 112.5%)     |
| 38 | Republic of Korea   | Self-harm by other specified means              | 0 (0 to 1) | 1 (0 to 1) | 83.3% (69.5% to 96.3%)    |
| 39 | Republic of Korea   | Unintentional firearm injuries                  | 0 (0 to 0) | 0 (0 to 0) | 19.6% (7.7% to 34.9%)     |
| 40 | Republic of Korea   | Venomous animal contact                         | 0 (0 to 0) | 0 (0 to 0) | -17.6% (-23.4% to -12%)   |
| 41 | Republic of Moldova | Adverse effects of medical treatment            | 0 (0 to 0) | 0 (0 to 0) | 0% (0% to 0%)             |
| 42 | Republic of Moldova | Conflict and terrorism                          | 0 (0 to 0) | 0 (0 to 0) | NA                        |
| 43 | Republic of Moldova | Cyclist road injuries                           | 1 (0 to 1) | 0 (0 to 1) | -36.7% (-43.6% to -29%)   |
| 44 | Republic of Moldova | Drowning                                        | 0 (0 to 0) | 0 (0 to 0) | 19.1% (7.5% to 31%)       |
| 45 |                     |                                                 |            |            |                           |
| 46 |                     |                                                 |            |            |                           |

|    |                     |                                                 |            |            |                           |
|----|---------------------|-------------------------------------------------|------------|------------|---------------------------|
| 1  |                     |                                                 |            |            |                           |
| 2  | Republic of Moldova | Environmental heat and cold exposure            | 0 (0 to 0) | 0 (0 to 1) | 18% (9.3% to 28.4%)       |
| 3  | Republic of Moldova | Executions and police conflict                  | 0 (0 to 0) | 0 (0 to 0) | NA                        |
| 4  | Republic of Moldova | Exposure to forces of nature                    | 0 (0 to 0) | 0 (0 to 0) | NA                        |
| 5  | Republic of Moldova | Falls                                           | 5 (4 to 6) | 4 (3 to 6) | -13.6% (-18.1% to -8%)    |
| 6  | Republic of Moldova | Fire, heat, and hot substances                  | 0 (0 to 0) | 0 (0 to 0) | -27.6% (-34% to -21%)     |
| 7  | Republic of Moldova | Foreign body in eyes                            | 0 (0 to 0) | 0 (0 to 0) | 0% (0% to 0%)             |
| 8  | Republic of Moldova | Foreign body in other body part                 | 0 (0 to 0) | 0 (0 to 0) | 0.9% (-2.8% to 5.2%)      |
| 9  | Republic of Moldova | Motor vehicle road injuries                     | 2 (1 to 4) | 1 (1 to 2) | -32.5% (-39.8% to -24.3%) |
| 10 | Republic of Moldova | Motorcyclist road injuries                      | 0 (0 to 1) | 0 (0 to 0) | -51% (-59.1% to -41.7%)   |
| 11 | Republic of Moldova | Non-venomous animal contact                     | 0 (0 to 0) | 0 (0 to 0) | 0.7% (-3.4% to 4.6%)      |
| 12 | Republic of Moldova | Other exposure to mechanical forces             | 1 (0 to 2) | 1 (0 to 1) | -19% (-26.7% to -11.7%)   |
| 13 | Republic of Moldova | Other road injuries                             | 0 (0 to 0) | 0 (0 to 0) | -41.6% (-49% to -33.5%)   |
| 14 | Republic of Moldova | Other transport injuries                        | 0 (0 to 0) | 0 (0 to 0) | -23.1% (-29.1% to -16.8%) |
| 15 | Republic of Moldova | Other unintentional injuries                    | 0 (0 to 1) | 0 (0 to 0) | -41.6% (-47% to -34.7%)   |
| 16 | Republic of Moldova | Pedestrian road injuries                        | 1 (0 to 1) | 0 (0 to 1) | -56.6% (-62.2% to -51.1%) |
| 17 | Republic of Moldova | Physical violence by firearm                    | 0 (0 to 0) | 0 (0 to 0) | 11.2% (-12.5% to 37.3%)   |
| 18 | Republic of Moldova | Physical violence by other means                | 1 (0 to 1) | 0 (0 to 1) | -46.5% (-53.2% to -38.5%) |
| 19 | Republic of Moldova | Physical violence by sharp object               | 0 (0 to 0) | 0 (0 to 0) | -33.2% (-43.4% to -20.6%) |
| 20 | Republic of Moldova | Poisoning by carbon monoxide                    | 0 (0 to 0) | 0 (0 to 0) | -0.9% (-9% to 8.3%)       |
| 21 | Republic of Moldova | Poisoning by other means                        | 0 (0 to 0) | 0 (0 to 0) | -27.2% (-35.3% to -18.6%) |
| 22 | Republic of Moldova | Pulmonary aspiration and foreign body in airway | 0 (0 to 0) | 0 (0 to 0) | -4% (-10.5% to 4.1%)      |
| 23 | Republic of Moldova | Self-harm by firearm                            | 0 (0 to 0) | 0 (0 to 0) | -6.2% (-17.9% to 9.2%)    |
| 24 | Republic of Moldova | Self-harm by other specified means              | 0 (0 to 1) | 0 (0 to 0) | -16.9% (-21.9% to -10.8%) |
| 25 | Republic of Moldova | Unintentional firearm injuries                  | 0 (0 to 0) | 0 (0 to 0) | -18.2% (-28.9% to -7.9%)  |
| 26 | Republic of Moldova | Venomous animal contact                         | 0 (0 to 0) | 0 (0 to 0) | 6.4% (0.5% to 13%)        |
| 27 | Romania             | Adverse effects of medical treatment            | 0 (0 to 0) | 0 (0 to 0) | 0% (0% to 0%)             |
| 28 | Romania             | Conflict and terrorism                          | 0 (0 to 1) | 0 (0 to 0) | NA                        |
| 29 | Romania             | Cyclist road injuries                           | 1 (0 to 1) | 0 (0 to 1) | -16.3% (-25.5% to -5.1%)  |
| 30 | Romania             | Drowning                                        | 0 (0 to 0) | 0 (0 to 0) | 41.1% (24.3% to 59.5%)    |
| 31 | Romania             | Environmental heat and cold exposure            | 0 (0 to 0) | 0 (0 to 0) | -15.3% (-20.1% to -11%)   |
| 32 | Romania             | Executions and police conflict                  | 0 (0 to 0) | 0 (0 to 0) | NA                        |
| 33 | Romania             | Exposure to forces of nature                    | 0 (0 to 0) | 0 (0 to 0) | NA                        |
| 34 | Romania             | Falls                                           | 6 (5 to 8) | 6 (4 to 8) | -9.8% (-15.3% to -3.9%)   |
| 35 | Romania             | Fire, heat, and hot substances                  | 0 (0 to 0) | 0 (0 to 0) | -24.9% (-30.2% to -19.8%) |
| 36 | Romania             | Foreign body in eyes                            | 0 (0 to 0) | 0 (0 to 0) | 0% (0% to 0%)             |
| 37 | Romania             | Foreign body in other body part                 | 0 (0 to 0) | 0 (0 to 0) | 0.9% (-3.3% to 5.3%)      |
| 38 | Romania             | Motor vehicle road injuries                     | 1 (1 to 3) | 1 (1 to 2) | -18.5% (-26.6% to -9.1%)  |
| 39 | Romania             | Motorcyclist road injuries                      | 0 (0 to 0) | 0 (0 to 0) | -23.4% (-35% to -10.6%)   |
| 40 | Romania             | Non-venomous animal contact                     | 0 (0 to 0) | 0 (0 to 0) | -12.6% (-16% to -8.7%)    |
| 41 | Romania             | Other exposure to mechanical forces             | 2 (1 to 3) | 2 (1 to 3) | -12.7% (-19.2% to -6%)    |
| 42 | Romania             | Other road injuries                             | 0 (0 to 0) | 0 (0 to 0) | -29.5% (-38.9% to -20%)   |
| 43 | Romania             | Other transport injuries                        | 0 (0 to 0) | 0 (0 to 0) | -12.7% (-17.6% to -7.6%)  |
| 44 | Romania             | Other unintentional injuries                    | 0 (0 to 1) | 0 (0 to 0) | -16.7% (-23.5% to -9.6%)  |
| 45 |                     |                                                 |            |            |                           |
| 46 |                     |                                                 |            |            |                           |

|    |                    |                                                 |              |            |                           |
|----|--------------------|-------------------------------------------------|--------------|------------|---------------------------|
| 1  |                    |                                                 |              |            |                           |
| 2  | Romania            | Pedestrian road injuries                        | 0 (0 to 1)   | 0 (0 to 0) | -48.4% (-55.1% to -40.7%) |
| 3  | Romania            | Physical violence by firearm                    | 0 (0 to 0)   | 0 (0 to 0) | 104.3% (77.2% to 137.5%)  |
| 4  | Romania            | Physical violence by other means                | 0 (0 to 1)   | 0 (0 to 1) | -35.9% (-44.9% to -24.9%) |
| 5  | Romania            | Physical violence by sharp object               | 0 (0 to 0)   | 0 (0 to 0) | -41.3% (-52.1% to -30.5%) |
| 6  | Romania            | Poisoning by carbon monoxide                    | 0 (0 to 0)   | 0 (0 to 0) | -4.7% (-19.9% to 11.7%)   |
| 7  | Romania            | Poisoning by other means                        | 0 (0 to 0)   | 0 (0 to 0) | -49.5% (-59.2% to -39.9%) |
| 8  | Romania            | Pulmonary aspiration and foreign body in airway | 0 (0 to 0)   | 0 (0 to 0) | -20.7% (-28.5% to -13.3%) |
| 9  | Romania            | Self-harm by firearm                            | 0 (0 to 0)   | 0 (0 to 0) | 36% (17.1% to 63.1%)      |
| 10 | Romania            | Self-harm by other specified means              | 0 (0 to 0)   | 0 (0 to 0) | 6.8% (1% to 13.1%)        |
| 11 | Romania            | Unintentional firearm injuries                  | 0 (0 to 0)   | 0 (0 to 0) | 1.3% (-9.3% to 13%)       |
| 12 | Romania            | Venomous animal contact                         | 0 (0 to 0)   | 0 (0 to 0) | -17.3% (-21.7% to -12.9%) |
| 13 | Russian Federation | Adverse effects of medical treatment            | 0 (0 to 0)   | 0 (0 to 0) | 0% (0% to 0%)             |
| 14 | Russian Federation | Conflict and terrorism                          | 0 (0 to 0)   | 0 (0 to 0) | NA                        |
| 15 | Russian Federation | Cyclist road injuries                           | 1 (0 to 1)   | 1 (0 to 1) | -19.3% (-23.6% to -14.6%) |
| 16 | Russian Federation | Drowning                                        | 0 (0 to 0)   | 0 (0 to 0) | -49.1% (-51.9% to -46.1%) |
| 17 | Russian Federation | Environmental heat and cold exposure            | 1 (0 to 1)   | 0 (0 to 1) | -43.8% (-47.1% to -40.1%) |
| 18 | Russian Federation | Executions and police conflict                  | 0 (0 to 0)   | 0 (0 to 0) | NA                        |
| 19 | Russian Federation | Exposure to forces of nature                    | 0 (0 to 0)   | 0 (0 to 0) | NA                        |
| 20 | Russian Federation | Falls                                           | 5 (4 to 7)   | 6 (4 to 8) | 7.1% (4.4% to 9.5%)       |
| 21 | Russian Federation | Fire, heat, and hot substances                  | 0 (0 to 0)   | 0 (0 to 0) | -24% (-26.9% to -21.8%)   |
| 22 | Russian Federation | Foreign body in eyes                            | 0 (0 to 0)   | 0 (0 to 0) | 0% (0% to 0%)             |
| 23 | Russian Federation | Foreign body in other body part                 | 0 (0 to 0)   | 0 (0 to 0) | -0.1% (-0.9% to 0.8%)     |
| 24 | Russian Federation | Motor vehicle road injuries                     | 3 (2 to 5)   | 3 (1 to 5) | -14.5% (-17.9% to -9.9%)  |
| 25 | Russian Federation | Motorcyclist road injuries                      | 0 (0 to 1)   | 0 (0 to 0) | -26.5% (-30.6% to -22.2%) |
| 26 | Russian Federation | Non-venomous animal contact                     | 0 (0 to 0)   | 0 (0 to 0) | -10.6% (-12.9% to -8.6%)  |
| 27 | Russian Federation | Other exposure to mechanical forces             | 1 (1 to 3)   | 1 (0 to 2) | -33.1% (-36.5% to -30.3%) |
| 28 | Russian Federation | Other road injuries                             | 0 (0 to 0)   | 0 (0 to 0) | -15.1% (-20.2% to -9.6%)  |
| 29 | Russian Federation | Other transport injuries                        | 0 (0 to 0)   | 0 (0 to 0) | -2.6% (-4.1% to -1%)      |
| 30 | Russian Federation | Other unintentional injuries                    | 0 (0 to 1)   | 0 (0 to 0) | -23.3% (-26.1% to -20.3%) |
| 31 | Russian Federation | Pedestrian road injuries                        | 1 (1 to 2)   | 1 (0 to 1) | -58.6% (-61.2% to -55.9%) |
| 32 | Russian Federation | Physical violence by firearm                    | 0 (0 to 0)   | 0 (0 to 0) | -17.2% (-25.9% to -8.7%)  |
| 33 | Russian Federation | Physical violence by other means                | 1 (0 to 1)   | 1 (0 to 1) | -32.3% (-34.5% to -29.5%) |
| 34 | Russian Federation | Physical violence by sharp object               | 0 (0 to 1)   | 0 (0 to 0) | -46.5% (-50.2% to -42.9%) |
| 35 | Russian Federation | Poisoning by carbon monoxide                    | 0 (0 to 0)   | 0 (0 to 0) | -30.5% (-34.7% to -25.7%) |
| 36 | Russian Federation | Poisoning by other means                        | 0 (0 to 0)   | 0 (0 to 0) | -28.7% (-33.8% to -23.7%) |
| 37 | Russian Federation | Pulmonary aspiration and foreign body in airway | 0 (0 to 0)   | 0 (0 to 0) | -7.8% (-11% to -4.2%)     |
| 38 | Russian Federation | Self-harm by firearm                            | 0 (0 to 0)   | 0 (0 to 0) | -25.3% (-30.4% to -19.7%) |
| 39 | Russian Federation | Self-harm by other specified means              | 1 (0 to 1)   | 1 (0 to 1) | -20.8% (-23% to -18.5%)   |
| 40 | Russian Federation | Unintentional firearm injuries                  | 0 (0 to 0)   | 0 (0 to 0) | -22.8% (-29.4% to -17.1%) |
| 41 | Russian Federation | Venomous animal contact                         | 0 (0 to 0)   | 0 (0 to 0) | -7.6% (-10.1% to -5.4%)   |
| 42 | Rwanda             | Adverse effects of medical treatment            | 0 (0 to 0)   | 0 (0 to 0) | 0% (0% to 0%)             |
| 43 | Rwanda             | Conflict and terrorism                          | 11 (2 to 34) | 0 (0 to 0) | NA                        |
| 44 | Rwanda             | Cyclist road injuries                           | 3 (1 to 5)   | 2 (1 to 4) | -28% (-33.5% to -22.6%)   |
| 45 |                    |                                                 |              |            |                           |
| 46 |                    |                                                 |              |            |                           |

|    |                       |                                                 |            |            |                           |
|----|-----------------------|-------------------------------------------------|------------|------------|---------------------------|
| 1  |                       |                                                 |            |            |                           |
| 2  | Rwanda                | Drowning                                        | 0 (0 to 0) | 0 (0 to 0) | -13.5% (-21.7% to -4.5%)  |
| 3  | Rwanda                | Environmental heat and cold exposure            | 0 (0 to 0) | 0 (0 to 0) | -13.1% (-19.6% to -6.9%)  |
| 4  | Rwanda                | Executions and police conflict                  | 0 (0 to 0) | 0 (0 to 0) | NA                        |
| 5  | Rwanda                | Exposure to forces of nature                    | 0 (0 to 0) | 0 (0 to 0) | NA                        |
| 6  | Rwanda                | Falls                                           | 3 (2 to 5) | 4 (3 to 6) | 27% (22.2% to 31.8%)      |
| 7  | Rwanda                | Fire, heat, and hot substances                  | 0 (0 to 0) | 0 (0 to 0) | -22.5% (-28.4% to -16.8%) |
| 8  | Rwanda                | Foreign body in eyes                            | 0 (0 to 0) | 0 (0 to 0) | 0% (0% to 0%)             |
| 9  | Rwanda                | Foreign body in other body part                 | 1 (0 to 1) | 1 (0 to 1) | -2.9% (-7.1% to 2.4%)     |
| 10 | Rwanda                | Motor vehicle road injuries                     | 1 (0 to 2) | 1 (0 to 2) | -18.6% (-25.8% to -9.7%)  |
| 11 | Rwanda                | Motorcyclist road injuries                      | 1 (1 to 3) | 1 (1 to 2) | -17.7% (-23.9% to -11.2%) |
| 12 | Rwanda                | Non-venomous animal contact                     | 0 (0 to 1) | 0 (0 to 1) | -25.5% (-29.6% to -20.9%) |
| 13 | Rwanda                | Other exposure to mechanical forces             | 0 (0 to 0) | 0 (0 to 0) | -11.5% (-18.3% to -4.9%)  |
| 14 | Rwanda                | Other road injuries                             | 0 (0 to 0) | 0 (0 to 0) | -6.7% (-15% to 2.8%)      |
| 15 | Rwanda                | Other transport injuries                        | 1 (0 to 1) | 0 (0 to 1) | -28.8% (-33.7% to -23.2%) |
| 16 | Rwanda                | Other unintentional injuries                    | 0 (0 to 1) | 0 (0 to 0) | -23.5% (-29.1% to -17.5%) |
| 17 | Rwanda                | Pedestrian road injuries                        | 3 (1 to 6) | 2 (1 to 4) | -29.4% (-34.6% to -24.1%) |
| 18 | Rwanda                | Physical violence by firearm                    | 0 (0 to 0) | 0 (0 to 0) | 7.7% (-9.8% to 28.8%)     |
| 19 | Rwanda                | Physical violence by other means                | 0 (0 to 0) | 0 (0 to 0) | -29.3% (-34.6% to -23.9%) |
| 20 | Rwanda                | Physical violence by sharp object               | 0 (0 to 0) | 0 (0 to 0) | -18.5% (-25.8% to -10.1%) |
| 21 | Rwanda                | Poisoning by carbon monoxide                    | 0 (0 to 0) | 0 (0 to 0) | 18.7% (5.5% to 34.5%)     |
| 22 | Rwanda                | Poisoning by other means                        | 0 (0 to 0) | 0 (0 to 0) | -26.5% (-33.9% to -17.2%) |
| 23 | Rwanda                | Pulmonary aspiration and foreign body in airway | 0 (0 to 0) | 0 (0 to 0) | -15.9% (-25.9% to -5.7%)  |
| 24 | Rwanda                | Self-harm by firearm                            | 0 (0 to 0) | 0 (0 to 0) | -0.7% (-13.5% to 17.2%)   |
| 25 | Rwanda                | Self-harm by other specified means              | 0 (0 to 0) | 0 (0 to 0) | -35.2% (-39.6% to -31%)   |
| 26 | Rwanda                | Unintentional firearm injuries                  | 0 (0 to 0) | 0 (0 to 0) | -26.6% (-35.2% to -18.4%) |
| 27 | Rwanda                | Venomous animal contact                         | 0 (0 to 0) | 0 (0 to 0) | -33% (-40.5% to -25.3%)   |
| 28 | Saint Kitts and Nevis | Adverse effects of medical treatment            | 0 (0 to 0) | 0 (0 to 0) | 0% (0% to 0%)             |
| 29 | Saint Kitts and Nevis | Conflict and terrorism                          | 0 (0 to 0) | 0 (0 to 0) | NA                        |
| 30 | Saint Kitts and Nevis | Cyclist road injuries                           | 1 (0 to 2) | 1 (0 to 1) | -17.5% (-28.2% to -6.4%)  |
| 31 | Saint Kitts and Nevis | Drowning                                        | 0 (0 to 0) | 0 (0 to 0) | 30.5% (16.3% to 43.4%)    |
| 32 | Saint Kitts and Nevis | Environmental heat and cold exposure            | 0 (0 to 0) | 0 (0 to 0) | 2% (-1.7% to 6%)          |
| 33 | Saint Kitts and Nevis | Executions and police conflict                  | 0 (0 to 0) | 0 (0 to 0) | NA                        |
| 34 | Saint Kitts and Nevis | Exposure to forces of nature                    | 0 (0 to 0) | 0 (0 to 0) | NA                        |
| 35 | Saint Kitts and Nevis | Falls                                           | 5 (3 to 7) | 6 (4 to 9) | 29.4% (24.3% to 33.9%)    |
| 36 | Saint Kitts and Nevis | Fire, heat, and hot substances                  | 1 (0 to 1) | 0 (0 to 1) | -34.4% (-39.8% to -29%)   |
| 37 | Saint Kitts and Nevis | Foreign body in eyes                            | 0 (0 to 0) | 0 (0 to 0) | 0% (0% to 0%)             |
| 38 | Saint Kitts and Nevis | Foreign body in other body part                 | 0 (0 to 1) | 0 (0 to 0) | -1.5% (-5.6% to 3.6%)     |
| 39 | Saint Kitts and Nevis | Motor vehicle road injuries                     | 1 (0 to 2) | 1 (0 to 1) | -27.9% (-37% to -17.2%)   |
| 40 | Saint Kitts and Nevis | Motorcyclist road injuries                      | 1 (0 to 1) | 1 (0 to 1) | 18.8% (3.7% to 39.4%)     |
| 41 | Saint Kitts and Nevis | Non-venomous animal contact                     | 0 (0 to 0) | 0 (0 to 0) | -4.5% (-10% to 2%)        |
| 42 | Saint Kitts and Nevis | Other exposure to mechanical forces             | 1 (0 to 1) | 1 (0 to 1) | 8% (-0.9% to 17%)         |
| 43 | Saint Kitts and Nevis | Other road injuries                             | 0 (0 to 0) | 0 (0 to 0) | -1.6% (-14.7% to 13.7%)   |
| 44 | Saint Kitts and Nevis | Other transport injuries                        | 0 (0 to 0) | 0 (0 to 0) | 4.7% (-0.4% to 9.8%)      |
| 45 |                       |                                                 |            |            |                           |
| 46 |                       |                                                 |            |            |                           |

|    |                                  |                                                 |            |            |                           |
|----|----------------------------------|-------------------------------------------------|------------|------------|---------------------------|
| 1  |                                  |                                                 |            |            |                           |
| 2  | Saint Kitts and Nevis            | Other unintentional injuries                    | 0 (0 to 1) | 0 (0 to 1) | -9.3% (-14.6% to -4.2%)   |
| 3  | Saint Kitts and Nevis            | Pedestrian road injuries                        | 1 (0 to 1) | 1 (0 to 1) | -34.4% (-43% to -25.7%)   |
| 4  | Saint Kitts and Nevis            | Physical violence by firearm                    | 0 (0 to 0) | 0 (0 to 0) | 241.3% (170.5% to 355.1%) |
| 5  | Saint Kitts and Nevis            | Physical violence by other means                | 0 (0 to 0) | 0 (0 to 0) | 19.4% (2.5% to 38.1%)     |
| 6  | Saint Kitts and Nevis            | Physical violence by sharp object               | 0 (0 to 0) | 0 (0 to 0) | 38.3% (14.5% to 67.2%)    |
| 7  | Saint Kitts and Nevis            | Poisoning by carbon monoxide                    | 0 (0 to 0) | 0 (0 to 0) | 19.6% (5.4% to 35.1%)     |
| 8  | Saint Kitts and Nevis            | Poisoning by other means                        | 0 (0 to 0) | 0 (0 to 0) | -6.1% (-16.4% to 3.1%)    |
| 9  | Saint Kitts and Nevis            | Pulmonary aspiration and foreign body in airway | 0 (0 to 0) | 0 (0 to 0) | -12.1% (-20.3% to -3.9%)  |
| 10 | Saint Kitts and Nevis            | Self-harm by firearm                            | 0 (0 to 0) | 0 (0 to 0) | 19.6% (2% to 44.9%)       |
| 11 | Saint Kitts and Nevis            | Self-harm by other specified means              | 0 (0 to 0) | 0 (0 to 0) | -16.5% (-28.4% to -2.5%)  |
| 12 | Saint Kitts and Nevis            | Unintentional firearm injuries                  | 0 (0 to 1) | 0 (0 to 0) | -16.6% (-28.3% to -6.3%)  |
| 13 | Saint Kitts and Nevis            | Venomous animal contact                         | 0 (0 to 0) | 0 (0 to 0) | -4.6% (-11% to 3.1%)      |
| 14 | Saint Lucia                      | Adverse effects of medical treatment            | 0 (0 to 0) | 0 (0 to 0) | 0% (0% to 0%)             |
| 15 | Saint Lucia                      | Conflict and terrorism                          | 0 (0 to 1) | 0 (0 to 0) | NA                        |
| 16 | Saint Lucia                      | Cyclist road injuries                           | 0 (0 to 1) | 0 (0 to 0) | -22.7% (-32% to -12.6%)   |
| 17 | Saint Lucia                      | Drowning                                        | 0 (0 to 0) | 0 (0 to 0) | 32.7% (17.6% to 49.7%)    |
| 18 | Saint Lucia                      | Environmental heat and cold exposure            | 0 (0 to 0) | 0 (0 to 0) | 5.6% (1.9% to 9.6%)       |
| 19 | Saint Lucia                      | Executions and police conflict                  | 0 (0 to 0) | 0 (0 to 0) | NA                        |
| 20 | Saint Lucia                      | Exposure to forces of nature                    | 0 (0 to 0) | 0 (0 to 0) | NA                        |
| 21 | Saint Lucia                      | Falls                                           | 1 (1 to 1) | 1 (1 to 2) | 45.6% (40.2% to 50.8%)    |
| 22 | Saint Lucia                      | Fire, heat, and hot substances                  | 0 (0 to 0) | 0 (0 to 0) | -15.4% (-21.4% to -9%)    |
| 23 | Saint Lucia                      | Foreign body in eyes                            | 0 (0 to 0) | 0 (0 to 0) | 0% (0% to 0%)             |
| 24 | Saint Lucia                      | Foreign body in other body part                 | 0 (0 to 0) | 0 (0 to 0) | 1.5% (-2.3% to 6%)        |
| 25 | Saint Lucia                      | Motor vehicle road injuries                     | 1 (0 to 1) | 1 (0 to 1) | -24% (-32.3% to -15.7%)   |
| 26 | Saint Lucia                      | Motorcyclist road injuries                      | 0 (0 to 0) | 0 (0 to 0) | 34.7% (16.9% to 58%)      |
| 27 | Saint Lucia                      | Non-venomous animal contact                     | 0 (0 to 0) | 0 (0 to 0) | -0.7% (-6.3% to 5.6%)     |
| 28 | Saint Lucia                      | Other exposure to mechanical forces             | 0 (0 to 1) | 0 (0 to 1) | 23.7% (16.3% to 32.5%)    |
| 29 | Saint Lucia                      | Other road injuries                             | 0 (0 to 0) | 0 (0 to 0) | -6.1% (-16.4% to 6%)      |
| 30 | Saint Lucia                      | Other transport injuries                        | 0 (0 to 0) | 0 (0 to 0) | 19.6% (13% to 26.4%)      |
| 31 | Saint Lucia                      | Other unintentional injuries                    | 0 (0 to 0) | 0 (0 to 0) | -6.6% (-11.4% to -1.6%)   |
| 32 | Saint Lucia                      | Pedestrian road injuries                        | 0 (0 to 0) | 0 (0 to 0) | -33.7% (-41.1% to -25.3%) |
| 33 | Saint Lucia                      | Physical violence by firearm                    | 0 (0 to 0) | 0 (0 to 0) | 166.1% (119.3% to 228.7%) |
| 34 | Saint Lucia                      | Physical violence by other means                | 0 (0 to 0) | 0 (0 to 0) | 8% (-3.8% to 20.7%)       |
| 35 | Saint Lucia                      | Physical violence by sharp object               | 0 (0 to 0) | 0 (0 to 0) | 17.3% (0.1% to 34.8%)     |
| 36 | Saint Lucia                      | Poisoning by carbon monoxide                    | 0 (0 to 0) | 0 (0 to 0) | 14.3% (0.6% to 30.4%)     |
| 37 | Saint Lucia                      | Poisoning by other means                        | 0 (0 to 0) | 0 (0 to 0) | -6.4% (-16.5% to 3.6%)    |
| 38 | Saint Lucia                      | Pulmonary aspiration and foreign body in airway | 0 (0 to 0) | 0 (0 to 0) | -20.5% (-26.9% to -13.5%) |
| 39 | Saint Lucia                      | Self-harm by firearm                            | 0 (0 to 0) | 0 (0 to 0) | 8.3% (-3.5% to 24.1%)     |
| 40 | Saint Lucia                      | Self-harm by other specified means              | 0 (0 to 0) | 0 (0 to 0) | -6.9% (-14.6% to 0.5%)    |
| 41 | Saint Lucia                      | Unintentional firearm injuries                  | 0 (0 to 0) | 0 (0 to 0) | 15.9% (6.9% to 24.9%)     |
| 42 | Saint Lucia                      | Venomous animal contact                         | 0 (0 to 0) | 0 (0 to 0) | 0.2% (-5.9% to 6.8%)      |
| 43 | Saint Vincent and the Grenadines | Adverse effects of medical treatment            | 0 (0 to 0) | 0 (0 to 0) | 0% (0% to 0%)             |
| 44 | Saint Vincent and the Grenadines | Conflict and terrorism                          | 0 (0 to 0) | 0 (0 to 0) | NA                        |
| 45 |                                  |                                                 |            |            |                           |
| 46 |                                  |                                                 |            |            |                           |

|    |                                  |                                                 |            |            |                           |
|----|----------------------------------|-------------------------------------------------|------------|------------|---------------------------|
| 1  |                                  |                                                 |            |            |                           |
| 2  | Saint Vincent and the Grenadines | Cyclist road injuries                           | 0 (0 to 0) | 0 (0 to 0) | -17.9% (-25.8% to -9.1%)  |
| 3  | Saint Vincent and the Grenadines | Drowning                                        | 0 (0 to 0) | 0 (0 to 0) | 10.7% (1.1% to 20.9%)     |
| 4  | Saint Vincent and the Grenadines | Environmental heat and cold exposure            | 0 (0 to 1) | 0 (0 to 1) | 5.5% (1.7% to 9.7%)       |
| 5  | Saint Vincent and the Grenadines | Executions and police conflict                  | 0 (0 to 0) | 0 (0 to 0) | NA                        |
| 6  | Saint Vincent and the Grenadines | Exposure to forces of nature                    | 0 (0 to 0) | 0 (0 to 0) | NA                        |
| 7  | Saint Vincent and the Grenadines | Falls                                           | 1 (1 to 2) | 2 (1 to 2) | 46.4% (41% to 51.4%)      |
| 8  | Saint Vincent and the Grenadines | Fire, heat, and hot substances                  | 0 (0 to 0) | 0 (0 to 0) | -19.4% (-24.5% to -13.8%) |
| 9  | Saint Vincent and the Grenadines | Foreign body in eyes                            | 0 (0 to 0) | 0 (0 to 0) | 0% (0% to 0%)             |
| 10 | Saint Vincent and the Grenadines | Foreign body in other body part                 | 0 (0 to 0) | 0 (0 to 0) | -26.1% (-30.3% to -21.8%) |
| 11 | Saint Vincent and the Grenadines | Motor vehicle road injuries                     | 0 (0 to 1) | 0 (0 to 1) | -4.7% (-13% to 5.7%)      |
| 12 | Saint Vincent and the Grenadines | Motorcyclist road injuries                      | 0 (0 to 0) | 0 (0 to 0) | 16.5% (4.6% to 31.7%)     |
| 13 | Saint Vincent and the Grenadines | Non-venomous animal contact                     | 0 (0 to 0) | 0 (0 to 0) | 5% (-2% to 13.4%)         |
| 14 | Saint Vincent and the Grenadines | Other exposure to mechanical forces             | 0 (0 to 1) | 0 (0 to 1) | 28.8% (18.8% to 40.2%)    |
| 15 | Saint Vincent and the Grenadines | Other road injuries                             | 0 (0 to 0) | 0 (0 to 0) | -7.2% (-17.5% to 3.3%)    |
| 16 | Saint Vincent and the Grenadines | Other transport injuries                        | 0 (0 to 0) | 0 (0 to 0) | 7% (2.1% to 12.5%)        |
| 17 | Saint Vincent and the Grenadines | Other unintentional injuries                    | 0 (0 to 0) | 0 (0 to 0) | -3.3% (-7.8% to 1.2%)     |
| 18 | Saint Vincent and the Grenadines | Pedestrian road injuries                        | 0 (0 to 0) | 0 (0 to 0) | -49.2% (-55.8% to -42.6%) |
| 19 | Saint Vincent and the Grenadines | Physical violence by firearm                    | 0 (0 to 0) | 0 (0 to 0) | 86.5% (60.5% to 123.9%)   |
| 20 | Saint Vincent and the Grenadines | Physical violence by other means                | 0 (0 to 0) | 0 (0 to 0) | -1.3% (-12.2% to 10.2%)   |
| 21 | Saint Vincent and the Grenadines | Physical violence by sharp object               | 0 (0 to 0) | 0 (0 to 0) | 61.6% (42.2% to 87.7%)    |
| 22 | Saint Vincent and the Grenadines | Poisoning by carbon monoxide                    | 0 (0 to 0) | 0 (0 to 0) | 14.4% (0.2% to 30.4%)     |
| 23 | Saint Vincent and the Grenadines | Poisoning by other means                        | 0 (0 to 0) | 0 (0 to 0) | 4.2% (-5.9% to 13.8%)     |
| 24 | Saint Vincent and the Grenadines | Pulmonary aspiration and foreign body in airway | 0 (0 to 0) | 0 (0 to 0) | -16.3% (-22.9% to -8.7%)  |
| 25 | Saint Vincent and the Grenadines | Self-harm by firearm                            | 0 (0 to 0) | 0 (0 to 0) | 12.5% (0.5% to 28.9%)     |
| 26 | Saint Vincent and the Grenadines | Self-harm by other specified means              | 0 (0 to 0) | 0 (0 to 0) | -13.1% (-20.3% to -6.1%)  |
| 27 | Saint Vincent and the Grenadines | Unintentional firearm injuries                  | 0 (0 to 0) | 0 (0 to 0) | 4.4% (-6.3% to 13.8%)     |
| 28 | Saint Vincent and the Grenadines | Venomous animal contact                         | 0 (0 to 0) | 0 (0 to 0) | -3.2% (-9.8% to 3.7%)     |
| 29 | Samoa                            | Adverse effects of medical treatment            | 0 (0 to 0) | 0 (0 to 0) | 0% (0% to 0%)             |
| 30 | Samoa                            | Conflict and terrorism                          | 0 (0 to 0) | 0 (0 to 0) | NA                        |
| 31 | Samoa                            | Cyclist road injuries                           | 0 (0 to 0) | 0 (0 to 0) | 4% (-3.4% to 12.4%)       |
| 32 | Samoa                            | Drowning                                        | 0 (0 to 0) | 0 (0 to 0) | 17.2% (8.1% to 27.1%)     |
| 33 | Samoa                            | Environmental heat and cold exposure            | 0 (0 to 0) | 0 (0 to 0) | 0.1% (-4.9% to 4.8%)      |
| 34 | Samoa                            | Executions and police conflict                  | 0 (0 to 0) | 0 (0 to 0) | NA                        |
| 35 | Samoa                            | Exposure to forces of nature                    | 2 (1 to 3) | 0 (0 to 0) | NA                        |
| 36 | Samoa                            | Falls                                           | 1 (1 to 2) | 2 (1 to 2) | 45.7% (40.5% to 51.5%)    |
| 37 | Samoa                            | Fire, heat, and hot substances                  | 0 (0 to 0) | 0 (0 to 0) | 5.7% (-0.4% to 12.4%)     |
| 38 | Samoa                            | Foreign body in eyes                            | 0 (0 to 0) | 0 (0 to 0) | 0% (0% to 0%)             |
| 39 | Samoa                            | Foreign body in other body part                 | 0 (0 to 0) | 0 (0 to 0) | -2.2% (-6.8% to 1.5%)     |
| 40 | Samoa                            | Motor vehicle road injuries                     | 1 (0 to 1) | 1 (0 to 1) | -2.7% (-9.7% to 4.5%)     |
| 41 | Samoa                            | Motorcyclist road injuries                      | 0 (0 to 0) | 0 (0 to 0) | 19.2% (8.9% to 31.7%)     |
| 42 | Samoa                            | Non-venomous animal contact                     | 0 (0 to 0) | 0 (0 to 0) | -14.5% (-18.2% to -10.8%) |
| 43 | Samoa                            | Other exposure to mechanical forces             | 0 (0 to 0) | 0 (0 to 0) | -10.9% (-17.2% to -4.7%)  |
| 44 | Samoa                            | Other road injuries                             | 0 (0 to 0) | 0 (0 to 0) | 1.7% (-7.6% to 13%)       |
| 45 |                                  |                                                 |            |            |                           |
| 46 |                                  |                                                 |            |            |                           |



|    |                       |                                                 |              |               |                           |
|----|-----------------------|-------------------------------------------------|--------------|---------------|---------------------------|
| 1  |                       |                                                 |              |               |                           |
| 2  | Samoa                 | Other transport injuries                        | 0 (0 to 0)   | 0 (0 to 0)    | -3.3% (-7.5% to 0.8%)     |
| 3  | Samoa                 | Other unintentional injuries                    | 0 (0 to 0)   | 0 (0 to 0)    | -2% (-6.4% to 2.6%)       |
| 4  | Samoa                 | Pedestrian road injuries                        | 0 (0 to 0)   | 0 (0 to 0)    | 13.4% (3.8% to 23.5%)     |
| 5  | Samoa                 | Physical violence by firearm                    | 0 (0 to 0)   | 0 (0 to 0)    | 1.6% (-9.8% to 13.9%)     |
| 6  | Samoa                 | Physical violence by other means                | 0 (0 to 1)   | 1 (0 to 1)    | 4.8% (-1.9% to 12.2%)     |
| 7  | Samoa                 | Physical violence by sharp object               | 0 (0 to 0)   | 0 (0 to 0)    | -20.1% (-28.5% to -12.8%) |
| 8  | Samoa                 | Poisoning by carbon monoxide                    | 0 (0 to 0)   | 0 (0 to 0)    | 14.8% (4.6% to 25.5%)     |
| 9  | Samoa                 | Poisoning by other means                        | 0 (0 to 0)   | 0 (0 to 0)    | -12% (-18.3% to -5.6%)    |
| 10 | Samoa                 | Pulmonary aspiration and foreign body in airway | 0 (0 to 0)   | 0 (0 to 0)    | -5.1% (-13.8% to 5.2%)    |
| 11 | Samoa                 | Self-harm by firearm                            | 0 (0 to 0)   | 0 (0 to 0)    | -7.7% (-22.2% to 8.6%)    |
| 12 | Samoa                 | Self-harm by other specified means              | 0 (0 to 0)   | 0 (0 to 0)    | -3.1% (-8.4% to 2.6%)     |
| 13 | Samoa                 | Unintentional firearm injuries                  | 0 (0 to 0)   | 0 (0 to 0)    | -16.7% (-23.8% to -10.6%) |
| 14 | Samoa                 | Venomous animal contact                         | 0 (0 to 0)   | 0 (0 to 0)    | -11.7% (-17.1% to -5.7%)  |
| 15 | San Marino            | Adverse effects of medical treatment            | 0 (0 to 0)   | 0 (0 to 0)    | 0% (0% to 0%)             |
| 16 | San Marino            | Conflict and terrorism                          | 0 (0 to 0)   | 0 (0 to 0)    | NA                        |
| 17 | San Marino            | Cyclist road injuries                           | 1 (0 to 1)   | 1 (0 to 1)    | -26.9% (-33.1% to -19.7%) |
| 18 | San Marino            | Drowning                                        | 0 (0 to 0)   | 0 (0 to 0)    | 67.1% (55.5% to 82.1%)    |
| 19 | San Marino            | Environmental heat and cold exposure            | 0 (0 to 0)   | 0 (0 to 0)    | -3.8% (-8.2% to 0.8%)     |
| 20 | San Marino            | Executions and police conflict                  | 0 (0 to 0)   | 0 (0 to 0)    | NA                        |
| 21 | San Marino            | Exposure to forces of nature                    | 0 (0 to 0)   | 0 (0 to 0)    | NA                        |
| 22 | San Marino            | Falls                                           | 12 (8 to 17) | 15 (10 to 21) | 21% (16.8% to 24.8%)      |
| 23 | San Marino            | Fire, heat, and hot substances                  | 0 (0 to 0)   | 0 (0 to 0)    | 2.9% (-0.8% to 7.1%)      |
| 24 | San Marino            | Foreign body in eyes                            | 0 (0 to 0)   | 0 (0 to 0)    | 0% (0% to 0%)             |
| 25 | San Marino            | Foreign body in other body part                 | 0 (0 to 1)   | 0 (0 to 1)    | 0.5% (-3.3% to 5.3%)      |
| 26 | San Marino            | Motor vehicle road injuries                     | 1 (0 to 2)   | 1 (0 to 1)    | -25.3% (-31.8% to -18%)   |
| 27 | San Marino            | Motorcyclist road injuries                      | 1 (0 to 2)   | 1 (0 to 1)    | -19.8% (-28% to -11.2%)   |
| 28 | San Marino            | Non-venomous animal contact                     | 0 (0 to 0)   | 0 (0 to 0)    | -4.2% (-8% to -0.5%)      |
| 29 | San Marino            | Other exposure to mechanical forces             | 1 (0 to 2)   | 1 (0 to 1)    | -7.8% (-12.7% to -3.2%)   |
| 30 | San Marino            | Other road injuries                             | 0 (0 to 0)   | 0 (0 to 0)    | -4.8% (-14.3% to 7.5%)    |
| 31 | San Marino            | Other transport injuries                        | 0 (0 to 0)   | 0 (0 to 0)    | 7.6% (3.2% to 11.8%)      |
| 32 | San Marino            | Other unintentional injuries                    | 1 (1 to 1)   | 1 (0 to 1)    | -8.3% (-12.1% to -4.9%)   |
| 33 | San Marino            | Pedestrian road injuries                        | 0 (0 to 1)   | 0 (0 to 0)    | -25.8% (-33% to -18.4%)   |
| 34 | San Marino            | Physical violence by firearm                    | 0 (0 to 0)   | 0 (0 to 0)    | 24% (14.9% to 35.8%)      |
| 35 | San Marino            | Physical violence by other means                | 0 (0 to 0)   | 0 (0 to 0)    | 0.8% (-4.3% to 6%)        |
| 36 | San Marino            | Physical violence by sharp object               | 0 (0 to 0)   | 0 (0 to 0)    | -2.5% (-10.5% to 5.9%)    |
| 37 | San Marino            | Poisoning by carbon monoxide                    | 0 (0 to 0)   | 0 (0 to 0)    | 28.1% (19% to 37.7%)      |
| 38 | San Marino            | Poisoning by other means                        | 0 (0 to 0)   | 0 (0 to 0)    | -13% (-17.3% to -7.3%)    |
| 39 | San Marino            | Pulmonary aspiration and foreign body in airway | 0 (0 to 0)   | 0 (0 to 0)    | -3.4% (-9.7% to 3.8%)     |
| 40 | San Marino            | Self-harm by firearm                            | 0 (0 to 0)   | 0 (0 to 0)    | -7.5% (-17% to 2.9%)      |
| 41 | San Marino            | Self-harm by other specified means              | 0 (0 to 0)   | 0 (0 to 0)    | -0.9% (-5.8% to 3.4%)     |
| 42 | San Marino            | Unintentional firearm injuries                  | 0 (0 to 0)   | 0 (0 to 0)    | 6.9% (-0.8% to 15%)       |
| 43 | San Marino            | Venomous animal contact                         | 0 (0 to 0)   | 0 (0 to 0)    | -6.2% (-12.8% to 0.5%)    |
| 44 | Sao Tome and Principe | Adverse effects of medical treatment            | 0 (0 to 0)   | 0 (0 to 0)    | 0% (0% to 0%)             |
| 45 |                       |                                                 |              |               |                           |
| 46 |                       |                                                 |              |               |                           |

|    |                       |                                                 |            |             |                          |
|----|-----------------------|-------------------------------------------------|------------|-------------|--------------------------|
| 1  |                       |                                                 |            |             |                          |
| 2  | Sao Tome and Principe | Conflict and terrorism                          | 0 (0 to 0) | 0 (0 to 0)  | NA                       |
| 3  | Sao Tome and Principe | Cyclist road injuries                           | 1 (0 to 2) | 1 (1 to 2)  | 25.5% (16.7% to 35.7%)   |
| 4  | Sao Tome and Principe | Drowning                                        | 0 (0 to 0) | 0 (0 to 0)  | 23.7% (12.8% to 36.8%)   |
| 5  | Sao Tome and Principe | Environmental heat and cold exposure            | 0 (0 to 0) | 0 (0 to 0)  | 3.9% (-1.3% to 9.4%)     |
| 6  | Sao Tome and Principe | Executions and police conflict                  | 0 (0 to 0) | 0 (0 to 0)  | NA                       |
| 7  | Sao Tome and Principe | Exposure to forces of nature                    | 0 (0 to 0) | 0 (0 to 0)  | NA                       |
| 8  | Sao Tome and Principe | Falls                                           | 4 (3 to 6) | 6 (4 to 8)  | 37.6% (33% to 42.6%)     |
| 9  | Sao Tome and Principe | Fire, heat, and hot substances                  | 0 (0 to 0) | 0 (0 to 0)  | 5.7% (0.7% to 11.3%)     |
| 10 | Sao Tome and Principe | Foreign body in eyes                            | 0 (0 to 0) | 0 (0 to 0)  | 0% (0% to 0%)            |
| 11 | Sao Tome and Principe | Foreign body in other body part                 | 1 (0 to 1) | 1 (0 to 1)  | 0% (-4% to 4.1%)         |
| 12 | Sao Tome and Principe | Motor vehicle road injuries                     | 1 (1 to 2) | 2 (1 to 3)  | 30.8% (22.1% to 40.9%)   |
| 13 | Sao Tome and Principe | Motorcyclist road injuries                      | 0 (0 to 1) | 1 (0 to 1)  | 23.9% (14% to 35.4%)     |
| 14 | Sao Tome and Principe | Non-venomous animal contact                     | 0 (0 to 0) | 0 (0 to 0)  | 1.8% (-1.7% to 5.9%)     |
| 15 | Sao Tome and Principe | Other exposure to mechanical forces             | 0 (0 to 0) | 0 (0 to 0)  | -7.9% (-13.6% to -2.8%)  |
| 16 | Sao Tome and Principe | Other road injuries                             | 0 (0 to 0) | 0 (0 to 0)  | 13.7% (5% to 23.6%)      |
| 17 | Sao Tome and Principe | Other transport injuries                        | 0 (0 to 1) | 0 (0 to 1)  | 2.4% (-2.3% to 7%)       |
| 18 | Sao Tome and Principe | Other unintentional injuries                    | 0 (0 to 0) | 0 (0 to 0)  | -7.5% (-13.6% to -2%)    |
| 19 | Sao Tome and Principe | Pedestrian road injuries                        | 1 (1 to 3) | 2 (1 to 3)  | 16% (8.6% to 24.2%)      |
| 20 | Sao Tome and Principe | Physical violence by firearm                    | 0 (0 to 0) | 0 (0 to 0)  | 63.4% (44.9% to 88%)     |
| 21 | Sao Tome and Principe | Physical violence by other means                | 0 (0 to 0) | 0 (0 to 0)  | 9.7% (3% to 16.8%)       |
| 22 | Sao Tome and Principe | Physical violence by sharp object               | 0 (0 to 0) | 0 (0 to 0)  | 10.2% (1.9% to 19.2%)    |
| 23 | Sao Tome and Principe | Poisoning by carbon monoxide                    | 0 (0 to 0) | 0 (0 to 0)  | 25.8% (11.6% to 41.1%)   |
| 24 | Sao Tome and Principe | Poisoning by other means                        | 0 (0 to 0) | 0 (0 to 0)  | -8.3% (-16.1% to 0.1%)   |
| 25 | Sao Tome and Principe | Pulmonary aspiration and foreign body in airway | 0 (0 to 0) | 0 (0 to 0)  | -3.1% (-13.7% to 7.4%)   |
| 26 | Sao Tome and Principe | Self-harm by firearm                            | 0 (0 to 0) | 0 (0 to 0)  | 40.4% (29.9% to 54.6%)   |
| 27 | Sao Tome and Principe | Self-harm by other specified means              | 0 (0 to 0) | 0 (0 to 0)  | 36.4% (29.9% to 45.5%)   |
| 28 | Sao Tome and Principe | Unintentional firearm injuries                  | 0 (0 to 0) | 0 (0 to 0)  | -9.8% (-17.7% to -2.6%)  |
| 29 | Sao Tome and Principe | Venomous animal contact                         | 0 (0 to 0) | 0 (0 to 0)  | 3% (-3.2% to 10.3%)      |
| 30 | Saudi Arabia          | Adverse effects of medical treatment            | 0 (0 to 0) | 0 (0 to 0)  | 0% (0% to 0%)            |
| 31 | Saudi Arabia          | Conflict and terrorism                          | 0 (0 to 0) | 0 (0 to 0)  | NA                       |
| 32 | Saudi Arabia          | Cyclist road injuries                           | 0 (0 to 0) | 0 (0 to 0)  | -9.3% (-17.9% to 0.6%)   |
| 33 | Saudi Arabia          | Drowning                                        | 0 (0 to 0) | 0 (0 to 0)  | 123.2% (97.1% to 150.2%) |
| 34 | Saudi Arabia          | Environmental heat and cold exposure            | 0 (0 to 0) | 0 (0 to 0)  | 2.9% (-1.3% to 6.9%)     |
| 35 | Saudi Arabia          | Executions and police conflict                  | 0 (0 to 0) | 0 (0 to 0)  | NA                       |
| 36 | Saudi Arabia          | Exposure to forces of nature                    | 0 (0 to 0) | 0 (0 to 0)  | NA                       |
| 37 | Saudi Arabia          | Falls                                           | 5 (4 to 7) | 8 (6 to 10) | 58.3% (52.5% to 64.8%)   |
| 38 | Saudi Arabia          | Fire, heat, and hot substances                  | 0 (0 to 0) | 0 (0 to 0)  | 0.6% (-5.5% to 6.9%)     |
| 39 | Saudi Arabia          | Foreign body in eyes                            | 0 (0 to 0) | 0 (0 to 0)  | 0% (0% to 0%)            |
| 40 | Saudi Arabia          | Foreign body in other body part                 | 0 (0 to 0) | 0 (0 to 0)  | -1% (-4.7% to 2.6%)      |
| 41 | Saudi Arabia          | Motor vehicle road injuries                     | 1 (1 to 2) | 1 (1 to 2)  | 14.5% (5.5% to 23.6%)    |
| 42 | Saudi Arabia          | Motorcyclist road injuries                      | 0 (0 to 0) | 0 (0 to 0)  | 19.6% (5% to 37.4%)      |
| 43 | Saudi Arabia          | Non-venomous animal contact                     | 0 (0 to 0) | 0 (0 to 0)  | -0.2% (-4.6% to 4.5%)    |
| 44 | Saudi Arabia          | Other exposure to mechanical forces             | 0 (0 to 1) | 0 (0 to 1)  | -6.4% (-12.7% to 0.9%)   |
| 45 |                       |                                                 |            |             |                          |
| 46 |                       |                                                 |            |             |                          |

|    |              |                                                 |            |            |                           |
|----|--------------|-------------------------------------------------|------------|------------|---------------------------|
| 1  |              |                                                 |            |            |                           |
| 2  | Saudi Arabia | Other road injuries                             | 0 (0 to 0) | 0 (0 to 0) | -1.8% (-12.7% to 9.8%)    |
| 3  | Saudi Arabia | Other transport injuries                        | 0 (0 to 0) | 0 (0 to 0) | 13.2% (7.3% to 19.5%)     |
| 4  | Saudi Arabia | Other unintentional injuries                    | 1 (0 to 1) | 0 (0 to 1) | -32.8% (-36.8% to -28.5%) |
| 5  | Saudi Arabia | Pedestrian road injuries                        | 0 (0 to 1) | 0 (0 to 1) | -14.6% (-23.7% to -4.6%)  |
| 6  | Saudi Arabia | Physical violence by firearm                    | 0 (0 to 0) | 0 (0 to 0) | 79.1% (52.8% to 117.1%)   |
| 7  | Saudi Arabia | Physical violence by other means                | 0 (0 to 0) | 0 (0 to 0) | 12.8% (3% to 25%)         |
| 8  | Saudi Arabia | Physical violence by sharp object               | 0 (0 to 0) | 0 (0 to 0) | -27.7% (-36.8% to -19.2%) |
| 9  | Saudi Arabia | Poisoning by carbon monoxide                    | 0 (0 to 0) | 0 (0 to 0) | 50.5% (33.4% to 70.2%)    |
| 10 | Saudi Arabia | Poisoning by other means                        | 0 (0 to 0) | 0 (0 to 0) | -17.6% (-25.4% to -10%)   |
| 11 | Saudi Arabia | Pulmonary aspiration and foreign body in airway | 0 (0 to 0) | 0 (0 to 0) | 4.4% (-3.5% to 14.6%)     |
| 12 | Saudi Arabia | Self-harm by firearm                            | 0 (0 to 0) | 0 (0 to 0) | 69.9% (50.3% to 92.4%)    |
| 13 | Saudi Arabia | Self-harm by other specified means              | 0 (0 to 0) | 0 (0 to 0) | 90% (75.9% to 105.3%)     |
| 14 | Saudi Arabia | Unintentional firearm injuries                  | 0 (0 to 0) | 0 (0 to 0) | -30% (-37.8% to -23.1%)   |
| 15 | Senegal      | Venomous animal contact                         | 0 (0 to 0) | 0 (0 to 0) | 3.1% (-4.3% to 11%)       |
| 16 | Senegal      | Adverse effects of medical treatment            | 0 (0 to 0) | 0 (0 to 0) | 0% (0% to 0%)             |
| 17 | Senegal      | Conflict and terrorism                          | 0 (0 to 1) | 0 (0 to 0) | NA                        |
| 18 | Senegal      | Cyclist road injuries                           | 1 (0 to 2) | 1 (1 to 2) | 15% (7.4% to 23.6%)       |
| 19 | Senegal      | Drowning                                        | 0 (0 to 0) | 0 (0 to 0) | -5.4% (-12.8% to 2.4%)    |
| 20 | Senegal      | Environmental heat and cold exposure            | 0 (0 to 0) | 0 (0 to 0) | -1.9% (-6.9% to 3.6%)     |
| 21 | Senegal      | Executions and police conflict                  | 0 (0 to 0) | 0 (0 to 0) | NA                        |
| 22 | Senegal      | Exposure to forces of nature                    | 0 (0 to 0) | 0 (0 to 0) | NA                        |
| 23 | Senegal      | Falls                                           | 3 (2 to 4) | 3 (2 to 5) | 20.3% (16.2% to 24.8%)    |
| 24 | Senegal      | Fire, heat, and hot substances                  | 0 (0 to 0) | 0 (0 to 0) | -7.8% (-13.4% to -2.8%)   |
| 25 | Senegal      | Foreign body in eyes                            | 0 (0 to 0) | 0 (0 to 0) | 0% (0% to 0%)             |
| 26 | Senegal      | Foreign body in other body part                 | 1 (0 to 1) | 1 (0 to 1) | -0.2% (-3.3% to 3.4%)     |
| 27 | Senegal      | Motor vehicle road injuries                     | 2 (1 to 3) | 2 (1 to 4) | 18.5% (10.1% to 27.8%)    |
| 28 | Senegal      | Motorcyclist road injuries                      | 0 (0 to 1) | 0 (0 to 1) | 8.9% (0.7% to 18%)        |
| 29 | Senegal      | Non-venomous animal contact                     | 0 (0 to 0) | 0 (0 to 0) | -10.5% (-14.3% to -6.2%)  |
| 30 | Senegal      | Other exposure to mechanical forces             | 0 (0 to 0) | 0 (0 to 0) | -6.4% (-11.6% to -1.6%)   |
| 31 | Senegal      | Other road injuries                             | 0 (0 to 0) | 0 (0 to 0) | 12.3% (3% to 21.9%)       |
| 32 | Senegal      | Other transport injuries                        | 0 (0 to 0) | 0 (0 to 0) | -9.2% (-14% to -5%)       |
| 33 | Senegal      | Other unintentional injuries                    | 0 (0 to 0) | 0 (0 to 0) | -11.7% (-16.2% to -6.6%)  |
| 34 | Senegal      | Pedestrian road injuries                        | 2 (1 to 4) | 2 (1 to 3) | -10% (-15.7% to -4.2%)    |
| 35 | Senegal      | Physical violence by firearm                    | 0 (0 to 0) | 0 (0 to 0) | 51.3% (29.8% to 78.9%)    |
| 36 | Senegal      | Physical violence by other means                | 0 (0 to 0) | 0 (0 to 0) | 4.1% (-1.6% to 10.1%)     |
| 37 | Senegal      | Physical violence by sharp object               | 0 (0 to 0) | 0 (0 to 0) | 4.5% (-2.6% to 11.6%)     |
| 38 | Senegal      | Poisoning by carbon monoxide                    | 0 (0 to 0) | 0 (0 to 0) | 15.5% (1.4% to 30.4%)     |
| 39 | Senegal      | Poisoning by other means                        | 0 (0 to 0) | 0 (0 to 0) | -15.5% (-21.8% to -9%)    |
| 40 | Senegal      | Pulmonary aspiration and foreign body in airway | 0 (0 to 0) | 0 (0 to 0) | -5.2% (-12.6% to 2.8%)    |
| 41 | Senegal      | Self-harm by firearm                            | 0 (0 to 0) | 0 (0 to 0) | 15.5% (3.1% to 28.4%)     |
| 42 | Senegal      | Self-harm by other specified means              | 0 (0 to 0) | 0 (0 to 0) | 9.1% (4.6% to 14.2%)      |
| 43 | Senegal      | Unintentional firearm injuries                  | 0 (0 to 0) | 0 (0 to 0) | -13.2% (-20.8% to -6.5%)  |
| 44 | Senegal      | Venomous animal contact                         | 0 (0 to 0) | 0 (0 to 0) | -7.4% (-13.5% to -0.4%)   |
| 45 |              |                                                 |            |            |                           |
| 46 |              |                                                 |            |            |                           |

|    |            |                                                 |            |            |                           |
|----|------------|-------------------------------------------------|------------|------------|---------------------------|
| 1  |            |                                                 |            |            |                           |
| 2  | Serbia     | Adverse effects of medical treatment            | 0 (0 to 0) | 0 (0 to 0) | 0% (0% to 0%)             |
| 3  | Serbia     | Conflict and terrorism                          | 0 (0 to 0) | 0 (0 to 0) | NA                        |
| 4  | Serbia     | Cyclist road injuries                           | 1 (0 to 1) | 1 (0 to 1) | -21.7% (-30.1% to -12.3%) |
| 5  | Serbia     | Drowning                                        | 0 (0 to 0) | 0 (0 to 0) | 110.2% (79.1% to 148.5%)  |
| 6  | Serbia     | Environmental heat and cold exposure            | 0 (0 to 0) | 0 (0 to 0) | -8.2% (-12.7% to -3.7%)   |
| 7  | Serbia     | Executions and police conflict                  | 0 (0 to 0) | 0 (0 to 0) | NA                        |
| 8  | Serbia     | Exposure to forces of nature                    | 0 (0 to 0) | 0 (0 to 0) | NA                        |
| 9  | Serbia     | Falls                                           | 4 (3 to 5) | 5 (4 to 7) | 36.8% (30.8% to 42.2%)    |
| 10 | Serbia     | Fire, heat, and hot substances                  | 0 (0 to 0) | 0 (0 to 0) | 1.2% (-4.2% to 6.3%)      |
| 11 | Serbia     | Foreign body in eyes                            | 0 (0 to 0) | 0 (0 to 0) | 0% (0% to 0%)             |
| 12 | Serbia     | Foreign body in other body part                 | 0 (0 to 0) | 0 (0 to 0) | 0.8% (-3.3% to 4.8%)      |
| 13 | Serbia     | Motor vehicle road injuries                     | 2 (1 to 3) | 1 (1 to 2) | -25.8% (-32% to -17.6%)   |
| 14 | Serbia     | Motorcyclist road injuries                      | 0 (0 to 0) | 0 (0 to 0) | -28.9% (-38.8% to -18%)   |
| 15 | Serbia     | Non-venomous animal contact                     | 0 (0 to 0) | 0 (0 to 0) | -6% (-10% to -1.1%)       |
| 16 | Serbia     | Other exposure to mechanical forces             | 1 (1 to 3) | 2 (1 to 3) | 2.1% (-3.2% to 7.4%)      |
| 17 | Serbia     | Other road injuries                             | 0 (0 to 0) | 0 (0 to 0) | -11.2% (-21% to 0.1%)     |
| 18 | Serbia     | Other transport injuries                        | 0 (0 to 0) | 0 (0 to 0) | -11.1% (-17.3% to -4.9%)  |
| 19 | Serbia     | Other unintentional injuries                    | 0 (0 to 1) | 0 (0 to 0) | -24.2% (-31.1% to -16.9%) |
| 20 | Serbia     | Pedestrian road injuries                        | 0 (0 to 1) | 0 (0 to 1) | -38.4% (-46.1% to -30.3%) |
| 21 | Serbia     | Physical violence by firearm                    | 0 (0 to 0) | 0 (0 to 0) | -8.1% (-21.6% to 7.7%)    |
| 22 | Serbia     | Physical violence by other means                | 1 (0 to 1) | 0 (0 to 1) | -37.4% (-43.1% to -31.7%) |
| 23 | Serbia     | Physical violence by sharp object               | 0 (0 to 0) | 0 (0 to 0) | -34.5% (-43.1% to -25.5%) |
| 24 | Serbia     | Poisoning by carbon monoxide                    | 0 (0 to 0) | 0 (0 to 0) | 43.4% (31.8% to 56.7%)    |
| 25 | Serbia     | Poisoning by other means                        | 0 (0 to 0) | 0 (0 to 0) | 7.8% (-3.4% to 16.3%)     |
| 26 | Serbia     | Pulmonary aspiration and foreign body in airway | 0 (0 to 0) | 0 (0 to 0) | -14.3% (-22.5% to -7.2%)  |
| 27 | Serbia     | Self-harm by firearm                            | 0 (0 to 0) | 0 (0 to 0) | -12.5% (-23.8% to 3.8%)   |
| 28 | Serbia     | Self-harm by other specified means              | 0 (0 to 1) | 0 (0 to 0) | -32.7% (-36.4% to -28.7%) |
| 29 | Serbia     | Unintentional firearm injuries                  | 0 (0 to 0) | 0 (0 to 0) | -12.6% (-21.1% to -5.3%)  |
| 30 | Serbia     | Venomous animal contact                         | 0 (0 to 0) | 0 (0 to 0) | -10.7% (-16.2% to -5.4%)  |
| 31 | Seychelles | Adverse effects of medical treatment            | 0 (0 to 0) | 0 (0 to 0) | 0% (0% to 0%)             |
| 32 | Seychelles | Conflict and terrorism                          | 0 (0 to 0) | 0 (0 to 0) | NA                        |
| 33 | Seychelles | Cyclist road injuries                           | 0 (0 to 1) | 1 (0 to 1) | 30.1% (18.8% to 43%)      |
| 34 | Seychelles | Drowning                                        | 0 (0 to 0) | 0 (0 to 0) | 29.7% (16.8% to 41.8%)    |
| 35 | Seychelles | Environmental heat and cold exposure            | 0 (0 to 0) | 0 (0 to 0) | 2.1% (-2.7% to 6.7%)      |
| 36 | Seychelles | Executions and police conflict                  | 0 (0 to 0) | 0 (0 to 0) | NA                        |
| 37 | Seychelles | Exposure to forces of nature                    | 0 (0 to 0) | 0 (0 to 0) | NA                        |
| 38 | Seychelles | Falls                                           | 4 (3 to 5) | 4 (3 to 6) | 17.5% (12.9% to 21.6%)    |
| 39 | Seychelles | Fire, heat, and hot substances                  | 0 (0 to 0) | 0 (0 to 0) | -30.4% (-35.3% to -26%)   |
| 40 | Seychelles | Foreign body in eyes                            | 0 (0 to 0) | 0 (0 to 0) | 0% (0% to 0%)             |
| 41 | Seychelles | Foreign body in other body part                 | 0 (0 to 0) | 0 (0 to 0) | -0.1% (-3.6% to 3.7%)     |
| 42 | Seychelles | Motor vehicle road injuries                     | 1 (0 to 2) | 1 (1 to 2) | 26.8% (16.1% to 38.5%)    |
| 43 | Seychelles | Motorcyclist road injuries                      | 1 (0 to 2) | 1 (1 to 2) | 6.7% (-3.4% to 17.9%)     |
| 44 | Seychelles | Non-venomous animal contact                     | 0 (0 to 0) | 0 (0 to 0) | -18.2% (-21.7% to -13.5%) |
| 45 |            |                                                 |            |            |                           |
| 46 |            |                                                 |            |            |                           |

|    |              |                                                 |            |            |                           |
|----|--------------|-------------------------------------------------|------------|------------|---------------------------|
| 1  |              |                                                 |            |            |                           |
| 2  | Seychelles   | Other exposure to mechanical forces             | 0 (0 to 1) | 0 (0 to 0) | -26.8% (-33.7% to -21.1%) |
| 3  | Seychelles   | Other road injuries                             | 0 (0 to 0) | 0 (0 to 0) | 26.6% (14.8% to 40.3%)    |
| 4  | Seychelles   | Other transport injuries                        | 0 (0 to 0) | 0 (0 to 0) | 3.4% (-1.9% to 8.8%)      |
| 5  | Seychelles   | Other unintentional injuries                    | 0 (0 to 0) | 0 (0 to 0) | -12.8% (-18.3% to -6.9%)  |
| 6  | Seychelles   | Pedestrian road injuries                        | 1 (0 to 1) | 1 (0 to 1) | 12.4% (3.5% to 21.8%)     |
| 7  | Seychelles   | Physical violence by firearm                    | 0 (0 to 0) | 0 (0 to 0) | 42% (28.2% to 59.1%)      |
| 8  | Seychelles   | Physical violence by other means                | 1 (0 to 1) | 0 (0 to 1) | -16.1% (-21.1% to -10.9%) |
| 9  | Seychelles   | Physical violence by sharp object               | 0 (0 to 0) | 0 (0 to 0) | -21.5% (-29% to -14.3%)   |
| 10 | Seychelles   | Poisoning by carbon monoxide                    | 0 (0 to 0) | 0 (0 to 0) | 13% (2.4% to 25.5%)       |
| 11 | Seychelles   | Poisoning by other means                        | 0 (0 to 0) | 0 (0 to 0) | -15.7% (-21.5% to -10.1%) |
| 12 | Seychelles   | Pulmonary aspiration and foreign body in airway | 0 (0 to 0) | 0 (0 to 0) | -17.9% (-24.8% to -10.4%) |
| 13 | Seychelles   | Self-harm by firearm                            | 0 (0 to 0) | 0 (0 to 0) | 29.4% (7.5% to 58.8%)     |
| 14 | Seychelles   | Self-harm by other specified means              | 0 (0 to 0) | 0 (0 to 0) | 2.5% (-2.8% to 9.4%)      |
| 15 | Seychelles   | Unintentional firearm injuries                  | 0 (0 to 0) | 0 (0 to 0) | -12.6% (-21.4% to -3.4%)  |
| 16 | Sierra Leone | Venomous animal contact                         | 0 (0 to 0) | 0 (0 to 0) | -24.7% (-32.6% to -16.6%) |
| 17 | Sierra Leone | Adverse effects of medical treatment            | 0 (0 to 0) | 0 (0 to 0) | 0% (0% to 0%)             |
| 18 | Sierra Leone | Conflict and terrorism                          | 0 (0 to 0) | 0 (0 to 0) | NA                        |
| 19 | Sierra Leone | Cyclist road injuries                           | 1 (1 to 2) | 1 (1 to 2) | 11.7% (4.6% to 19.3%)     |
| 20 | Sierra Leone | Drowning                                        | 0 (0 to 0) | 0 (0 to 0) | -14.7% (-21.2% to -8.9%)  |
| 21 | Sierra Leone | Environmental heat and cold exposure            | 0 (0 to 0) | 0 (0 to 0) | 2.1% (-3.2% to 7.7%)      |
| 22 | Sierra Leone | Executions and police conflict                  | 0 (0 to 0) | 0 (0 to 0) | NA                        |
| 23 | Sierra Leone | Exposure to forces of nature                    | 0 (0 to 0) | 0 (0 to 0) | NA                        |
| 24 | Sierra Leone | Falls                                           | 2 (2 to 4) | 3 (2 to 4) | 16.5% (12% to 20.8%)      |
| 25 | Sierra Leone | Fire, heat, and hot substances                  | 0 (0 to 0) | 0 (0 to 0) | -5.6% (-11.2% to 0.6%)    |
| 26 | Sierra Leone | Foreign body in eyes                            | 0 (0 to 0) | 0 (0 to 0) | 0% (0% to 0%)             |
| 27 | Sierra Leone | Foreign body in other body part                 | 1 (0 to 1) | 1 (0 to 1) | 0.3% (-2.9% to 4.3%)      |
| 28 | Sierra Leone | Motor vehicle road injuries                     | 2 (1 to 3) | 2 (1 to 3) | 18.5% (10.2% to 27.6%)    |
| 29 | Sierra Leone | Motorcyclist road injuries                      | 1 (1 to 2) | 1 (1 to 2) | 3.8% (-3.6% to 10.9%)     |
| 30 | Sierra Leone | Non-venomous animal contact                     | 0 (0 to 0) | 0 (0 to 0) | 3.7% (-0.6% to 8.1%)      |
| 31 | Sierra Leone | Other exposure to mechanical forces             | 0 (0 to 0) | 0 (0 to 0) | -10.9% (-15.1% to -7%)    |
| 32 | Sierra Leone | Other road injuries                             | 0 (0 to 0) | 0 (0 to 0) | 16.2% (6.3% to 26.1%)     |
| 33 | Sierra Leone | Other transport injuries                        | 0 (0 to 1) | 0 (0 to 1) | -3.2% (-7.1% to 1.3%)     |
| 34 | Sierra Leone | Other unintentional injuries                    | 0 (0 to 1) | 0 (0 to 0) | -14.9% (-19.5% to -10.2%) |
| 35 | Sierra Leone | Pedestrian road injuries                        | 1 (1 to 2) | 1 (1 to 3) | 15.4% (7.2% to 23.4%)     |
| 36 | Sierra Leone | Physical violence by firearm                    | 0 (0 to 0) | 0 (0 to 0) | 22.8% (6.8% to 41.5%)     |
| 37 | Sierra Leone | Physical violence by other means                | 0 (0 to 0) | 0 (0 to 0) | -6.6% (-12% to -1.1%)     |
| 38 | Sierra Leone | Physical violence by sharp object               | 0 (0 to 0) | 0 (0 to 0) | -5.1% (-11.8% to 1.4%)    |
| 39 | Sierra Leone | Poisoning by carbon monoxide                    | 0 (0 to 0) | 0 (0 to 0) | 9.2% (-3.2% to 24.7%)     |
| 40 | Sierra Leone | Poisoning by other means                        | 0 (0 to 0) | 0 (0 to 0) | -20.9% (-27.6% to -14.2%) |
| 41 | Sierra Leone | Pulmonary aspiration and foreign body in airway | 0 (0 to 0) | 0 (0 to 0) | -5.8% (-15.3% to 4.6%)    |
| 42 | Sierra Leone | Self-harm by firearm                            | 0 (0 to 0) | 0 (0 to 0) | 25.8% (13.5% to 40.3%)    |
| 43 | Sierra Leone | Self-harm by other specified means              | 0 (0 to 0) | 0 (0 to 0) | 36.6% (30.9% to 43%)      |
| 44 | Sierra Leone | Unintentional firearm injuries                  | 0 (0 to 0) | 0 (0 to 0) | -14.4% (-21.2% to -8%)    |
| 45 |              |                                                 |            |            |                           |
| 46 |              |                                                 |            |            |                           |

|    |              |                                                 |             |             |                           |
|----|--------------|-------------------------------------------------|-------------|-------------|---------------------------|
| 1  |              |                                                 |             |             |                           |
| 2  | Sierra Leone | Venomous animal contact                         | 0 (0 to 0)  | 0 (0 to 0)  | 6.9% (-0.2% to 13.9%)     |
| 3  | Singapore    | Adverse effects of medical treatment            | 0 (0 to 0)  | 0 (0 to 0)  | 0% (0% to 0%)             |
| 4  | Singapore    | Conflict and terrorism                          | 0 (0 to 0)  | 0 (0 to 0)  | NA                        |
| 5  | Singapore    | Cyclist road injuries                           | 0 (0 to 0)  | 0 (0 to 0)  | -23.3% (-32.3% to -12.9%) |
| 6  | Singapore    | Drowning                                        | 0 (0 to 0)  | 0 (0 to 0)  | 135.7% (114.5% to 155.4%) |
| 7  | Singapore    | Environmental heat and cold exposure            | 0 (0 to 0)  | 0 (0 to 0)  | 10.6% (6.4% to 15.3%)     |
| 8  | Singapore    | Executions and police conflict                  | 0 (0 to 0)  | 0 (0 to 0)  | NA                        |
| 9  | Singapore    | Exposure to forces of nature                    | 0 (0 to 0)  | 0 (0 to 0)  | NA                        |
| 10 | Singapore    | Falls                                           | 3 (2 to 4)  | 3 (3 to 5)  | 3.7% (-1.1% to 8.4%)      |
| 11 | Singapore    | Fire, heat, and hot substances                  | 0 (0 to 0)  | 0 (0 to 0)  | 1.4% (-2.8% to 5.4%)      |
| 12 | Singapore    | Foreign body in eyes                            | 0 (0 to 0)  | 0 (0 to 0)  | 0% (0% to 0%)             |
| 13 | Singapore    | Foreign body in other body part                 | 0 (0 to 1)  | 0 (0 to 1)  | -4% (-6.7% to -0.9%)      |
| 14 | Singapore    | Motor vehicle road injuries                     | 0 (0 to 1)  | 0 (0 to 0)  | -18.3% (-28.7% to -7.4%)  |
| 15 | Singapore    | Motorcyclist road injuries                      | 0 (0 to 0)  | 0 (0 to 0)  | -42.5% (-52.7% to -31.5%) |
| 16 | Singapore    | Non-venomous animal contact                     | 0 (0 to 0)  | 0 (0 to 0)  | -26.5% (-29.5% to -23.3%) |
| 17 | Singapore    | Other exposure to mechanical forces             | 1 (0 to 2)  | 1 (0 to 1)  | -11.7% (-19% to -5.5%)    |
| 18 | Singapore    | Other road injuries                             | 0 (0 to 0)  | 0 (0 to 0)  | -15.9% (-26.4% to -4.4%)  |
| 19 | Singapore    | Other transport injuries                        | 0 (0 to 0)  | 0 (0 to 0)  | -5.5% (-8.9% to -1.8%)    |
| 20 | Singapore    | Other unintentional injuries                    | 0 (0 to 1)  | 0 (0 to 1)  | -18.2% (-24.3% to -12.5%) |
| 21 | Singapore    | Pedestrian road injuries                        | 0 (0 to 0)  | 0 (0 to 0)  | -25.6% (-37.3% to -12.5%) |
| 22 | Singapore    | Physical violence by firearm                    | 0 (0 to 0)  | 0 (0 to 0)  | 43.2% (22.7% to 69%)      |
| 23 | Singapore    | Physical violence by other means                | 0 (0 to 0)  | 0 (0 to 0)  | -28% (-38.4% to -18.2%)   |
| 24 | Singapore    | Physical violence by sharp object               | 0 (0 to 0)  | 0 (0 to 0)  | -34.5% (-47% to -21.7%)   |
| 25 | Singapore    | Poisoning by carbon monoxide                    | 0 (0 to 0)  | 0 (0 to 0)  | 14.7% (4.7% to 24.7%)     |
| 26 | Singapore    | Poisoning by other means                        | 0 (0 to 0)  | 0 (0 to 0)  | -5% (-9.9% to 0%)         |
| 27 | Singapore    | Pulmonary aspiration and foreign body in airway | 0 (0 to 0)  | 0 (0 to 0)  | -15.1% (-21.1% to -8%)    |
| 28 | Singapore    | Self-harm by firearm                            | 0 (0 to 0)  | 0 (0 to 0)  | 13.1% (-1.1% to 32.9%)    |
| 29 | Singapore    | Self-harm by other specified means              | 0 (0 to 1)  | 0 (0 to 0)  | -35.6% (-39.4% to -31%)   |
| 30 | Singapore    | Unintentional firearm injuries                  | 0 (0 to 0)  | 0 (0 to 0)  | 0.4% (-9.1% to 10%)       |
| 31 | Singapore    | Venomous animal contact                         | 0 (0 to 0)  | 0 (0 to 0)  | -23.7% (-28.2% to -18.7%) |
| 32 | Slovakia     | Adverse effects of medical treatment            | 0 (0 to 0)  | 0 (0 to 0)  | 0% (0% to 0%)             |
| 33 | Slovakia     | Conflict and terrorism                          | 0 (0 to 0)  | 0 (0 to 0)  | NA                        |
| 34 | Slovakia     | Cyclist road injuries                           | 1 (0 to 1)  | 1 (0 to 1)  | -30.8% (-39% to -22%)     |
| 35 | Slovakia     | Drowning                                        | 0 (0 to 0)  | 0 (0 to 0)  | 93% (73.6% to 118.5%)     |
| 36 | Slovakia     | Environmental heat and cold exposure            | 0 (0 to 0)  | 0 (0 to 0)  | -6.4% (-11.1% to -1.6%)   |
| 37 | Slovakia     | Executions and police conflict                  | 0 (0 to 0)  | 0 (0 to 0)  | NA                        |
| 38 | Slovakia     | Exposure to forces of nature                    | 0 (0 to 0)  | 0 (0 to 0)  | NA                        |
| 39 | Slovakia     | Falls                                           | 8 (6 to 11) | 8 (6 to 11) | 3.5% (-0.6% to 8.2%)      |
| 40 | Slovakia     | Fire, heat, and hot substances                  | 0 (0 to 0)  | 0 (0 to 0)  | -4.4% (-9% to 0.3%)       |
| 41 | Slovakia     | Foreign body in eyes                            | 0 (0 to 0)  | 0 (0 to 0)  | 0% (0% to 0%)             |
| 42 | Slovakia     | Foreign body in other body part                 | 0 (0 to 0)  | 0 (0 to 0)  | 1.7% (-2.5% to 5.2%)      |
| 43 | Slovakia     | Motor vehicle road injuries                     | 2 (1 to 3)  | 1 (1 to 2)  | -26.1% (-34.4% to -17.4%) |
| 44 | Slovakia     | Motorcyclist road injuries                      | 0 (0 to 0)  | 0 (0 to 0)  | -19.6% (-31.3% to -7%)    |
| 45 |              |                                                 |             |             |                           |
| 46 |              |                                                 |             |             |                           |

|    |          |                                                 |              |              |                           |
|----|----------|-------------------------------------------------|--------------|--------------|---------------------------|
| 1  |          |                                                 |              |              |                           |
| 2  | Slovakia | Non-venomous animal contact                     | 0 (0 to 0)   | 0 (0 to 0)   | -21.4% (-24.9% to -18.3%) |
| 3  | Slovakia | Other exposure to mechanical forces             | 2 (1 to 3)   | 2 (1 to 3)   | -9% (-16.4% to -2.8%)     |
| 4  | Slovakia | Other road injuries                             | 0 (0 to 0)   | 0 (0 to 0)   | -6.2% (-16.9% to 5.8%)    |
| 5  | Slovakia | Other transport injuries                        | 0 (0 to 0)   | 0 (0 to 0)   | -19.1% (-23.8% to -14.3%) |
| 6  | Slovakia | Other unintentional injuries                    | 0 (0 to 0)   | 0 (0 to 0)   | -10.7% (-15.9% to -5%)    |
| 7  | Slovakia | Pedestrian road injuries                        | 1 (0 to 1)   | 0 (0 to 1)   | -44.5% (-51.4% to -37%)   |
| 8  | Slovakia | Physical violence by firearm                    | 0 (0 to 0)   | 0 (0 to 0)   | 32.7% (15.9% to 50.9%)    |
| 9  | Slovakia | Physical violence by other means                | 0 (0 to 1)   | 0 (0 to 1)   | -19.2% (-26.4% to -12%)   |
| 10 | Slovakia | Physical violence by sharp object               | 0 (0 to 0)   | 0 (0 to 0)   | -24.3% (-32.9% to -16.2%) |
| 11 | Slovakia | Poisoning by carbon monoxide                    | 0 (0 to 0)   | 0 (0 to 0)   | 30% (19.5% to 42.4%)      |
| 12 | Slovakia | Poisoning by other means                        | 0 (0 to 0)   | 0 (0 to 0)   | -1.5% (-8.8% to 5.4%)     |
| 13 | Slovakia | Pulmonary aspiration and foreign body in airway | 0 (0 to 0)   | 0 (0 to 0)   | -17.2% (-23.1% to -10.4%) |
| 14 | Slovakia | Self-harm by firearm                            | 0 (0 to 0)   | 0 (0 to 0)   | -3.6% (-15.7% to 10.4%)   |
| 15 | Slovakia | Self-harm by other specified means              | 0 (0 to 0)   | 0 (0 to 0)   | -15% (-19.7% to -9.9%)    |
| 16 | Slovakia | Unintentional firearm injuries                  | 0 (0 to 0)   | 0 (0 to 0)   | -16% (-26% to -7%)        |
| 17 | Slovakia | Venomous animal contact                         | 0 (0 to 0)   | 0 (0 to 0)   | -17.8% (-22.5% to -12.1%) |
| 18 | Slovenia | Adverse effects of medical treatment            | 0 (0 to 0)   | 0 (0 to 0)   | 0% (0% to 0%)             |
| 19 | Slovenia | Conflict and terrorism                          | 0 (0 to 0)   | 0 (0 to 0)   | NA                        |
| 20 | Slovenia | Cyclist road injuries                           | 1 (0 to 2)   | 1 (0 to 1)   | -30.1% (-37.8% to -20.6%) |
| 21 | Slovenia | Drowning                                        | 0 (0 to 0)   | 0 (0 to 0)   | 142.8% (116.2% to 172.6%) |
| 22 | Slovenia | Environmental heat and cold exposure            | 0 (0 to 0)   | 0 (0 to 0)   | -40.7% (-46.4% to -35.1%) |
| 23 | Slovenia | Executions and police conflict                  | 0 (0 to 0)   | 0 (0 to 0)   | NA                        |
| 24 | Slovenia | Exposure to forces of nature                    | 0 (0 to 0)   | 0 (0 to 0)   | NA                        |
| 25 | Slovenia | Falls                                           | 10 (7 to 13) | 10 (7 to 13) | 0% (-4.5% to 4.8%)        |
| 26 | Slovenia | Fire, heat, and hot substances                  | 0 (0 to 0)   | 0 (0 to 0)   | 0.4% (-4.7% to 5.5%)      |
| 27 | Slovenia | Foreign body in eyes                            | 0 (0 to 0)   | 0 (0 to 0)   | 0% (0% to 0%)             |
| 28 | Slovenia | Foreign body in other body part                 | 0 (0 to 0)   | 0 (0 to 0)   | 2.7% (-1.4% to 6.9%)      |
| 29 | Slovenia | Motor vehicle road injuries                     | 3 (2 to 5)   | 2 (1 to 3)   | -50.5% (-56% to -45.1%)   |
| 30 | Slovenia | Motorcyclist road injuries                      | 0 (0 to 1)   | 0 (0 to 1)   | -12.4% (-25.4% to 4.3%)   |
| 31 | Slovenia | Non-venomous animal contact                     | 0 (0 to 0)   | 0 (0 to 0)   | -16.1% (-19.9% to -12%)   |
| 32 | Slovenia | Other exposure to mechanical forces             | 2 (1 to 4)   | 2 (1 to 4)   | -15.1% (-22.1% to -8.1%)  |
| 33 | Slovenia | Other road injuries                             | 0 (0 to 0)   | 0 (0 to 0)   | -10.3% (-21.7% to 1.7%)   |
| 34 | Slovenia | Other transport injuries                        | 0 (0 to 0)   | 0 (0 to 0)   | -2.9% (-7.5% to 1.3%)     |
| 35 | Slovenia | Other unintentional injuries                    | 0 (0 to 1)   | 0 (0 to 1)   | 8.7% (2.2% to 15.2%)      |
| 36 | Slovenia | Pedestrian road injuries                        | 0 (0 to 1)   | 0 (0 to 1)   | -38.1% (-48.1% to -26.3%) |
| 37 | Slovenia | Physical violence by firearm                    | 0 (0 to 0)   | 0 (0 to 0)   | 24.7% (9.8% to 41.6%)     |
| 38 | Slovenia | Physical violence by other means                | 0 (0 to 1)   | 0 (0 to 1)   | -20.8% (-29.9% to -12.7%) |
| 39 | Slovenia | Physical violence by sharp object               | 0 (0 to 0)   | 0 (0 to 0)   | -29% (-39.6% to -19.1%)   |
| 40 | Slovenia | Poisoning by carbon monoxide                    | 0 (0 to 0)   | 0 (0 to 0)   | 33.7% (23.3% to 44.7%)    |
| 41 | Slovenia | Poisoning by other means                        | 0 (0 to 0)   | 0 (0 to 0)   | 1.7% (-5.4% to 9%)        |
| 42 | Slovenia | Pulmonary aspiration and foreign body in airway | 0 (0 to 0)   | 0 (0 to 0)   | -5.9% (-13.1% to 1.6%)    |
| 43 | Slovenia | Self-harm by firearm                            | 0 (0 to 0)   | 0 (0 to 0)   | -18.6% (-28.4% to -5.3%)  |
| 44 | Slovenia | Self-harm by other specified means              | 1 (0 to 1)   | 0 (0 to 1)   | -39.2% (-43% to -35.1%)   |
| 45 |          |                                                 |              |              |                           |
| 46 |          |                                                 |              |              |                           |

|    |                 |                                                 |              |            |                           |
|----|-----------------|-------------------------------------------------|--------------|------------|---------------------------|
| 1  |                 |                                                 |              |            |                           |
| 2  | Slovenia        | Unintentional firearm injuries                  | 0 (0 to 0)   | 0 (0 to 0) | 1.4% (-9.5% to 12.8%)     |
| 3  | Slovenia        | Venomous animal contact                         | 0 (0 to 0)   | 0 (0 to 0) | -11.2% (-16.1% to -4.9%)  |
| 4  | Solomon Islands | Adverse effects of medical treatment            | 0 (0 to 0)   | 0 (0 to 0) | 0% (0% to 0%)             |
| 5  | Solomon Islands | Conflict and terrorism                          | 0 (0 to 0)   | 0 (0 to 0) | NA                        |
| 6  | Solomon Islands | Cyclist road injuries                           | 0 (0 to 0)   | 0 (0 to 0) | 7.2% (-0.1% to 14.9%)     |
| 7  | Solomon Islands | Drowning                                        | 0 (0 to 0)   | 0 (0 to 0) | 3.5% (-6.2% to 13.9%)     |
| 8  | Solomon Islands | Environmental heat and cold exposure            | 0 (0 to 0)   | 0 (0 to 0) | -4.8% (-10.3% to 0.8%)    |
| 9  | Solomon Islands | Executions and police conflict                  | 0 (0 to 0)   | 0 (0 to 0) | NA                        |
| 10 | Solomon Islands | Exposure to forces of nature                    | 0 (0 to 0)   | 0 (0 to 0) | NA                        |
| 11 | Solomon Islands | Falls                                           | 2 (2 to 3)   | 3 (2 to 4) | 40.9% (35.6% to 46.6%)    |
| 12 | Solomon Islands | Fire, heat, and hot substances                  | 0 (0 to 0)   | 0 (0 to 0) | -10.4% (-16.3% to -5%)    |
| 13 | Solomon Islands | Foreign body in eyes                            | 0 (0 to 0)   | 0 (0 to 0) | 0% (0% to 0%)             |
| 14 | Solomon Islands | Foreign body in other body part                 | 0 (0 to 0)   | 0 (0 to 0) | -2.8% (-5.8% to 0.5%)     |
| 15 | Solomon Islands | Motor vehicle road injuries                     | 0 (0 to 1)   | 0 (0 to 1) | -3.2% (-10% to 3.8%)      |
| 16 | Solomon Islands | Motorcyclist road injuries                      | 0 (0 to 0)   | 0 (0 to 0) | 5.5% (-3.6% to 14.9%)     |
| 17 | Solomon Islands | Non-venomous animal contact                     | 0 (0 to 0)   | 0 (0 to 0) | -15.9% (-20% to -12%)     |
| 18 | Solomon Islands | Other exposure to mechanical forces             | 0 (0 to 0)   | 0 (0 to 0) | -12.5% (-18.9% to -6.8%)  |
| 19 | Solomon Islands | Other road injuries                             | 0 (0 to 0)   | 0 (0 to 0) | 4.3% (-4.2% to 13.6%)     |
| 20 | Solomon Islands | Other transport injuries                        | 0 (0 to 0)   | 0 (0 to 0) | -8.8% (-12.9% to -5.5%)   |
| 21 | Solomon Islands | Other unintentional injuries                    | 0 (0 to 0)   | 0 (0 to 0) | -6.5% (-11.2% to -1.2%)   |
| 22 | Solomon Islands | Pedestrian road injuries                        | 0 (0 to 0)   | 0 (0 to 0) | 1.4% (-6.5% to 9.6%)      |
| 23 | Solomon Islands | Physical violence by firearm                    | 0 (0 to 0)   | 0 (0 to 0) | -13.1% (-24.2% to -1.9%)  |
| 24 | Solomon Islands | Physical violence by other means                | 0 (0 to 1)   | 0 (0 to 1) | -27.3% (-33.2% to -21.7%) |
| 25 | Solomon Islands | Physical violence by sharp object               | 0 (0 to 0)   | 0 (0 to 0) | -35.3% (-41.6% to -29.1%) |
| 26 | Solomon Islands | Poisoning by carbon monoxide                    | 0 (0 to 0)   | 0 (0 to 0) | 28.7% (16.1% to 44%)      |
| 27 | Solomon Islands | Poisoning by other means                        | 0 (0 to 0)   | 0 (0 to 0) | 0.1% (-7.9% to 8%)        |
| 28 | Solomon Islands | Pulmonary aspiration and foreign body in airway | 0 (0 to 0)   | 0 (0 to 0) | -0.4% (-11% to 11.1%)     |
| 29 | Solomon Islands | Self-harm by firearm                            | 0 (0 to 0)   | 0 (0 to 0) | -1.7% (-17.2% to 13.4%)   |
| 30 | Solomon Islands | Self-harm by other specified means              | 0 (0 to 0)   | 0 (0 to 0) | 16.4% (8.7% to 25.6%)     |
| 31 | Solomon Islands | Unintentional firearm injuries                  | 0 (0 to 0)   | 0 (0 to 0) | -14% (-19.5% to -8.4%)    |
| 32 | Solomon Islands | Venomous animal contact                         | 0 (0 to 0)   | 0 (0 to 0) | -10.1% (-16.8% to -2.8%)  |
| 33 | Somalia         | Adverse effects of medical treatment            | 0 (0 to 0)   | 0 (0 to 0) | 0% (0% to 0%)             |
| 34 | Somalia         | Conflict and terrorism                          | 11 (2 to 37) | 2 (0 to 8) | NA                        |
| 35 | Somalia         | Cyclist road injuries                           | 1 (1 to 2)   | 1 (1 to 3) | 9.5% (1.8% to 18.2%)      |
| 36 | Somalia         | Drowning                                        | 0 (0 to 0)   | 0 (0 to 0) | -13.3% (-18.3% to -7.6%)  |
| 37 | Somalia         | Environmental heat and cold exposure            | 0 (0 to 0)   | 0 (0 to 0) | -6.3% (-11% to -1.8%)     |
| 38 | Somalia         | Executions and police conflict                  | 0 (0 to 0)   | 0 (0 to 0) | NA                        |
| 39 | Somalia         | Exposure to forces of nature                    | 0 (0 to 0)   | 0 (0 to 0) | NA                        |
| 40 | Somalia         | Falls                                           | 3 (2 to 4)   | 3 (2 to 4) | 10.2% (6.4% to 13.6%)     |
| 41 | Somalia         | Fire, heat, and hot substances                  | 0 (0 to 0)   | 0 (0 to 0) | -11.3% (-15.6% to -6.7%)  |
| 42 | Somalia         | Foreign body in eyes                            | 0 (0 to 0)   | 0 (0 to 0) | 0% (0% to 0%)             |
| 43 | Somalia         | Foreign body in other body part                 | 1 (0 to 1)   | 1 (0 to 1) | -4.2% (-8.7% to -0.3%)    |
| 44 | Somalia         | Motor vehicle road injuries                     | 1 (0 to 2)   | 1 (0 to 2) | -9.1% (-16.5% to -0.9%)   |
| 45 |                 |                                                 |              |            |                           |
| 46 |                 |                                                 |              |            |                           |



|    |              |                                                 |            |            |                           |
|----|--------------|-------------------------------------------------|------------|------------|---------------------------|
| 1  |              |                                                 |            |            |                           |
| 2  | Somalia      | Motorcyclist road injuries                      | 1 (0 to 1) | 1 (0 to 1) | 20.9% (11.6% to 32%)      |
| 3  | Somalia      | Non-venomous animal contact                     | 1 (0 to 1) | 1 (0 to 2) | 2.3% (-2.3% to 7.1%)      |
| 4  | Somalia      | Other exposure to mechanical forces             | 0 (0 to 0) | 0 (0 to 0) | -6.1% (-10.8% to -0.3%)   |
| 5  | Somalia      | Other road injuries                             | 0 (0 to 0) | 0 (0 to 0) | -6.3% (-13.9% to 1.5%)    |
| 6  | Somalia      | Other transport injuries                        | 0 (0 to 1) | 0 (0 to 1) | 7.8% (2.6% to 12.9%)      |
| 7  | Somalia      | Other unintentional injuries                    | 0 (0 to 1) | 0 (0 to 0) | -11% (-14.9% to -6.7%)    |
| 8  | Somalia      | Pedestrian road injuries                        | 2 (1 to 4) | 2 (1 to 3) | -12% (-17.5% to -6.2%)    |
| 9  | Somalia      | Physical violence by firearm                    | 0 (0 to 0) | 0 (0 to 0) | 24% (13.3% to 34.6%)      |
| 10 | Somalia      | Physical violence by other means                | 0 (0 to 0) | 0 (0 to 0) | 17.3% (9.1% to 25.7%)     |
| 11 | Somalia      | Physical violence by sharp object               | 0 (0 to 0) | 0 (0 to 0) | 23% (13.3% to 33.5%)      |
| 12 | Somalia      | Poisoning by carbon monoxide                    | 0 (0 to 0) | 0 (0 to 0) | 3.5% (-7.2% to 15.7%)     |
| 13 | Somalia      | Poisoning by other means                        | 0 (0 to 0) | 0 (0 to 0) | -18.3% (-23.9% to -11.8%) |
| 14 | Somalia      | Pulmonary aspiration and foreign body in airway | 0 (0 to 0) | 0 (0 to 0) | -5.9% (-16.5% to 5.9%)    |
| 15 | Somalia      | Self-harm by firearm                            | 0 (0 to 0) | 0 (0 to 0) | 11.3% (-1.2% to 26.1%)    |
| 16 | Somalia      | Self-harm by other specified means              | 0 (0 to 0) | 0 (0 to 0) | 1.6% (-3% to 6.8%)        |
| 17 | Somalia      | Unintentional firearm injuries                  | 0 (0 to 0) | 0 (0 to 0) | -3.3% (-9.6% to 4.2%)     |
| 18 | Somalia      | Venomous animal contact                         | 0 (0 to 0) | 0 (0 to 0) | 4.2% (-2.2% to 11.6%)     |
| 19 | South Africa | Adverse effects of medical treatment            | 0 (0 to 0) | 0 (0 to 0) | 0% (0% to 0%)             |
| 20 | South Africa | Conflict and terrorism                          | 0 (0 to 1) | 0 (0 to 0) | NA                        |
| 21 | South Africa | Cyclist road injuries                           | 1 (0 to 1) | 1 (0 to 1) | -1.8% (-7.6% to 4.3%)     |
| 22 | South Africa | Drowning                                        | 0 (0 to 0) | 0 (0 to 0) | -35.5% (-42.2% to -26.4%) |
| 23 | South Africa | Environmental heat and cold exposure            | 0 (0 to 0) | 0 (0 to 0) | -5.9% (-10.6% to -1.2%)   |
| 24 | South Africa | Executions and police conflict                  | 0 (0 to 0) | 0 (0 to 0) | NA                        |
| 25 | South Africa | Exposure to forces of nature                    | 0 (0 to 0) | 0 (0 to 0) | NA                        |
| 26 | South Africa | Falls                                           | 3 (2 to 4) | 2 (2 to 4) | -6.3% (-8.6% to -3.8%)    |
| 27 | South Africa | Fire, heat, and hot substances                  | 0 (0 to 0) | 0 (0 to 0) | -30.7% (-35% to -26.2%)   |
| 28 | South Africa | Foreign body in eyes                            | 0 (0 to 0) | 0 (0 to 0) | 0% (0% to 0%)             |
| 29 | South Africa | Foreign body in other body part                 | 1 (1 to 2) | 1 (1 to 2) | -1.3% (-2.9% to 0.4%)     |
| 30 | South Africa | Motor vehicle road injuries                     | 2 (1 to 3) | 1 (1 to 2) | -23.4% (-28.5% to -18.2%) |
| 31 | South Africa | Motorcyclist road injuries                      | 0 (0 to 1) | 0 (0 to 1) | -21.2% (-26.8% to -16%)   |
| 32 | South Africa | Non-venomous animal contact                     | 0 (0 to 0) | 0 (0 to 0) | -11.3% (-15.6% to -6.3%)  |
| 33 | South Africa | Other exposure to mechanical forces             | 0 (0 to 1) | 0 (0 to 0) | -24.5% (-27.8% to -20.9%) |
| 34 | South Africa | Other road injuries                             | 0 (0 to 0) | 0 (0 to 0) | -0.4% (-7.4% to 6.4%)     |
| 35 | South Africa | Other transport injuries                        | 0 (0 to 1) | 0 (0 to 1) | -9.6% (-13.5% to -5.8%)   |
| 36 | South Africa | Other unintentional injuries                    | 0 (0 to 0) | 0 (0 to 0) | -15.1% (-19.4% to -10.9%) |
| 37 | South Africa | Pedestrian road injuries                        | 2 (1 to 3) | 1 (1 to 2) | -23.7% (-28.7% to -18.5%) |
| 38 | South Africa | Physical violence by firearm                    | 0 (0 to 0) | 0 (0 to 0) | -60.1% (-67.1% to -50.2%) |
| 39 | South Africa | Physical violence by other means                | 1 (0 to 2) | 0 (0 to 1) | -39.2% (-42.7% to -35.3%) |
| 40 | South Africa | Physical violence by sharp object               | 0 (0 to 1) | 0 (0 to 1) | -37.2% (-41.2% to -32.3%) |
| 41 | South Africa | Poisoning by carbon monoxide                    | 0 (0 to 0) | 0 (0 to 0) | -2.4% (-23.3% to 15.4%)   |
| 42 | South Africa | Poisoning by other means                        | 0 (0 to 0) | 0 (0 to 0) | -16.9% (-35.5% to 1.9%)   |
| 43 | South Africa | Pulmonary aspiration and foreign body in airway | 0 (0 to 0) | 0 (0 to 0) | -15.5% (-21.6% to -10.4%) |
| 44 | South Africa | Self-harm by firearm                            | 0 (0 to 0) | 0 (0 to 0) | -9.7% (-19.2% to 3.1%)    |
| 45 |              |                                                 |            |            |                           |
| 46 |              |                                                 |            |            |                           |

|    |              |                                                 |            |            |                           |
|----|--------------|-------------------------------------------------|------------|------------|---------------------------|
| 1  |              |                                                 |            |            |                           |
| 2  | South Africa | Self-harm by other specified means              | 0 (0 to 0) | 0 (0 to 0) | -34.3% (-39.4% to -29%)   |
| 3  | South Africa | Unintentional firearm injuries                  | 0 (0 to 0) | 0 (0 to 0) | -14.1% (-20.6% to -5.7%)  |
| 4  | South Africa | Venomous animal contact                         | 0 (0 to 0) | 0 (0 to 0) | -3.5% (-12.7% to 6.3%)    |
| 5  | South Sudan  | Adverse effects of medical treatment            | 0 (0 to 0) | 0 (0 to 0) | 0% (0% to 0%)             |
| 6  | South Sudan  | Conflict and terrorism                          | 0 (0 to 0) | 2 (0 to 5) | NA                        |
| 7  | South Sudan  | Cyclist road injuries                           | 1 (1 to 3) | 1 (1 to 3) | -6.2% (-12.1% to 0.1%)    |
| 8  | South Sudan  | Drowning                                        | 0 (0 to 0) | 0 (0 to 0) | -11.1% (-17.3% to -5.1%)  |
| 9  | South Sudan  | Environmental heat and cold exposure            | 0 (0 to 0) | 0 (0 to 0) | -7.7% (-11.9% to -3.4%)   |
| 10 | South Sudan  | Executions and police conflict                  | 0 (0 to 0) | 0 (0 to 0) | NA                        |
| 11 | South Sudan  | Exposure to forces of nature                    | 0 (0 to 0) | 0 (0 to 0) | NA                        |
| 12 | South Sudan  | Falls                                           | 3 (2 to 4) | 3 (2 to 4) | 6.8% (3.2% to 10.9%)      |
| 13 | South Sudan  | Fire, heat, and hot substances                  | 0 (0 to 0) | 0 (0 to 0) | -9.9% (-14.2% to -6.3%)   |
| 14 | South Sudan  | Foreign body in eyes                            | 0 (0 to 0) | 0 (0 to 0) | 0% (0% to 0%)             |
| 15 | South Sudan  | Foreign body in other body part                 | 1 (0 to 1) | 1 (0 to 1) | -5.7% (-9.1% to -2.3%)    |
| 16 | South Sudan  | Motor vehicle road injuries                     | 2 (1 to 3) | 1 (1 to 3) | -11.1% (-17.3% to -4.3%)  |
| 17 | South Sudan  | Motorcyclist road injuries                      | 1 (0 to 1) | 0 (0 to 1) | -9.7% (-16.4% to -2.9%)   |
| 18 | South Sudan  | Non-venomous animal contact                     | 1 (0 to 1) | 0 (0 to 1) | -10.5% (-14.5% to -6.9%)  |
| 19 | South Sudan  | Other exposure to mechanical forces             | 0 (0 to 1) | 0 (0 to 1) | -9.9% (-13.9% to -5.9%)   |
| 20 | South Sudan  | Other road injuries                             | 0 (0 to 0) | 0 (0 to 0) | -7.5% (-15.2% to 0.7%)    |
| 21 | South Sudan  | Other transport injuries                        | 0 (0 to 1) | 0 (0 to 1) | -5.7% (-9.1% to -1.9%)    |
| 22 | South Sudan  | Other unintentional injuries                    | 0 (0 to 1) | 0 (0 to 0) | -13.1% (-16.7% to -9.2%)  |
| 23 | South Sudan  | Pedestrian road injuries                        | 3 (1 to 5) | 2 (1 to 4) | -19.3% (-24.5% to -13.9%) |
| 24 | South Sudan  | Physical violence by firearm                    | 0 (0 to 0) | 0 (0 to 0) | 52.9% (38.9% to 69.8%)    |
| 25 | South Sudan  | Physical violence by other means                | 0 (0 to 0) | 0 (0 to 1) | 47.8% (36.9% to 59.8%)    |
| 26 | South Sudan  | Physical violence by sharp object               | 0 (0 to 0) | 0 (0 to 0) | 50.3% (36.6% to 65%)      |
| 27 | South Sudan  | Poisoning by carbon monoxide                    | 0 (0 to 0) | 0 (0 to 0) | 8.3% (-0.8% to 20.1%)     |
| 28 | South Sudan  | Poisoning by other means                        | 0 (0 to 0) | 0 (0 to 0) | -15.7% (-21.6% to -10.1%) |
| 29 | South Sudan  | Pulmonary aspiration and foreign body in airway | 0 (0 to 0) | 0 (0 to 0) | -5.4% (-15.6% to 5.3%)    |
| 30 | South Sudan  | Self-harm by firearm                            | 0 (0 to 0) | 0 (0 to 0) | 1.2% (-9.7% to 15%)       |
| 31 | South Sudan  | Self-harm by other specified means              | 0 (0 to 0) | 0 (0 to 0) | -10.7% (-15.4% to -6.3%)  |
| 32 | South Sudan  | Unintentional firearm injuries                  | 0 (0 to 0) | 0 (0 to 0) | -13.3% (-19.3% to -7.9%)  |
| 33 | South Sudan  | Venomous animal contact                         | 0 (0 to 0) | 0 (0 to 0) | -10.1% (-16.8% to -4.1%)  |
| 34 | Spain        | Adverse effects of medical treatment            | 0 (0 to 0) | 0 (0 to 0) | 0% (0% to 0%)             |
| 35 | Spain        | Conflict and terrorism                          | 0 (0 to 0) | 0 (0 to 0) | NA                        |
| 36 | Spain        | Cyclist road injuries                           | 0 (0 to 0) | 0 (0 to 0) | -25.6% (-37.5% to -11.4%) |
| 37 | Spain        | Drowning                                        | 0 (0 to 0) | 0 (0 to 0) | 39.8% (26.3% to 51.6%)    |
| 38 | Spain        | Environmental heat and cold exposure            | 0 (0 to 0) | 0 (0 to 0) | -2.4% (-6.7% to 2.4%)     |
| 39 | Spain        | Executions and police conflict                  | 0 (0 to 0) | 0 (0 to 0) | NA                        |
| 40 | Spain        | Exposure to forces of nature                    | 0 (0 to 0) | 0 (0 to 0) | NA                        |
| 41 | Spain        | Falls                                           | 4 (3 to 5) | 5 (4 to 7) | 28.4% (21.3% to 35.7%)    |
| 42 | Spain        | Fire, heat, and hot substances                  | 0 (0 to 0) | 0 (0 to 0) | -5.8% (-10.3% to -1%)     |
| 43 | Spain        | Foreign body in eyes                            | 0 (0 to 0) | 0 (0 to 0) | 0% (0% to 0%)             |
| 44 | Spain        | Foreign body in other body part                 | 0 (0 to 0) | 0 (0 to 0) | 3.1% (-0.9% to 6.7%)      |
| 45 |              |                                                 |            |            |                           |
| 46 |              |                                                 |            |            |                           |

|    |           |                                                 |              |            |                           |
|----|-----------|-------------------------------------------------|--------------|------------|---------------------------|
| 1  |           |                                                 |              |            |                           |
| 2  | Spain     | Motor vehicle road injuries                     | 1 (0 to 2)   | 0 (0 to 1) | -65.2% (-71.4% to -58.9%) |
| 3  | Spain     | Motorcyclist road injuries                      | 0 (0 to 0)   | 0 (0 to 0) | -40.8% (-52.8% to -25.5%) |
| 4  | Spain     | Non-venomous animal contact                     | 0 (0 to 0)   | 0 (0 to 0) | -13.8% (-17.4% to -10.2%) |
| 5  | Spain     | Other exposure to mechanical forces             | 1 (0 to 1)   | 0 (0 to 1) | -17.1% (-26.1% to -10.2%) |
| 6  | Spain     | Other road injuries                             | 0 (0 to 0)   | 0 (0 to 0) | -22.3% (-35% to -7.7%)    |
| 7  | Spain     | Other transport injuries                        | 0 (0 to 0)   | 0 (0 to 0) | -7.8% (-12.5% to -2.7%)   |
| 8  | Spain     | Other unintentional injuries                    | 0 (0 to 1)   | 0 (0 to 0) | -29% (-35.1% to -23.3%)   |
| 9  | Spain     | Pedestrian road injuries                        | 0 (0 to 0)   | 0 (0 to 0) | -62% (-69.6% to -53.4%)   |
| 10 | Spain     | Physical violence by firearm                    | 0 (0 to 0)   | 0 (0 to 0) | 31.3% (18.5% to 47.6%)    |
| 11 | Spain     | Physical violence by other means                | 0 (0 to 0)   | 0 (0 to 0) | -19.1% (-28.2% to -11.2%) |
| 12 | Spain     | Physical violence by sharp object               | 0 (0 to 0)   | 0 (0 to 0) | -17.2% (-28.7% to -6.5%)  |
| 13 | Spain     | Poisoning by carbon monoxide                    | 0 (0 to 0)   | 0 (0 to 0) | 4.6% (-4.6% to 13.4%)     |
| 14 | Spain     | Poisoning by other means                        | 0 (0 to 0)   | 0 (0 to 0) | -10.4% (-16.5% to -4.6%)  |
| 15 | Spain     | Pulmonary aspiration and foreign body in airway | 0 (0 to 0)   | 0 (0 to 0) | -8.4% (-16.9% to 0.4%)    |
| 16 | Spain     | Self-harm by firearm                            | 0 (0 to 0)   | 0 (0 to 0) | 5.6% (-4.9% to 18.6%)     |
| 17 | Spain     | Self-harm by other specified means              | 0 (0 to 0)   | 0 (0 to 0) | -9.9% (-14.7% to -4.7%)   |
| 18 | Spain     | Unintentional firearm injuries                  | 0 (0 to 0)   | 0 (0 to 0) | -25.5% (-35.7% to -16.6%) |
| 19 | Sri Lanka | Venomous animal contact                         | 0 (0 to 0)   | 0 (0 to 0) | -14% (-19.2% to -7.9%)    |
| 20 | Sri Lanka | Adverse effects of medical treatment            | 0 (0 to 0)   | 0 (0 to 0) | 0% (0% to 0%)             |
| 21 | Sri Lanka | Conflict and terrorism                          | 18 (4 to 54) | 1 (0 to 2) | NA                        |
| 22 | Sri Lanka | Cyclist road injuries                           | 0 (0 to 0)   | 0 (0 to 0) | 5.7% (-3.1% to 15.3%)     |
| 23 | Sri Lanka | Drowning                                        | 0 (0 to 0)   | 0 (0 to 0) | 43.3% (28% to 58.9%)      |
| 24 | Sri Lanka | Environmental heat and cold exposure            | 0 (0 to 0)   | 0 (0 to 0) | -17.2% (-23.2% to -11%)   |
| 25 | Sri Lanka | Executions and police conflict                  | 0 (0 to 0)   | 0 (0 to 0) | NA                        |
| 26 | Sri Lanka | Exposure to forces of nature                    | 0 (0 to 0)   | 0 (0 to 0) | NA                        |
| 27 | Sri Lanka | Falls                                           | 2 (1 to 3)   | 3 (2 to 4) | 57.6% (50.5% to 64.6%)    |
| 28 | Sri Lanka | Fire, heat, and hot substances                  | 0 (0 to 0)   | 0 (0 to 0) | -24.8% (-29.7% to -20.2%) |
| 29 | Sri Lanka | Foreign body in eyes                            | 0 (0 to 0)   | 0 (0 to 0) | 0% (0% to 0%)             |
| 30 | Sri Lanka | Foreign body in other body part                 | 0 (0 to 0)   | 0 (0 to 0) | -3.6% (-6.7% to -0.1%)    |
| 31 | Sri Lanka | Motor vehicle road injuries                     | 0 (0 to 1)   | 0 (0 to 1) | 6.2% (-2.5% to 15.5%)     |
| 32 | Sri Lanka | Motorcyclist road injuries                      | 0 (0 to 1)   | 0 (0 to 1) | 13.6% (4.1% to 25.6%)     |
| 33 | Sri Lanka | Non-venomous animal contact                     | 0 (0 to 0)   | 0 (0 to 0) | -46.4% (-51% to -41.8%)   |
| 34 | Sri Lanka | Other exposure to mechanical forces             | 0 (0 to 0)   | 0 (0 to 0) | -13.6% (-22.6% to -3.9%)  |
| 35 | Sri Lanka | Other road injuries                             | 0 (0 to 0)   | 0 (0 to 0) | 1.3% (-8.3% to 11.1%)     |
| 36 | Sri Lanka | Other transport injuries                        | 0 (0 to 0)   | 0 (0 to 0) | 1.5% (-4.3% to 7.2%)      |
| 37 | Sri Lanka | Other unintentional injuries                    | 0 (0 to 0)   | 0 (0 to 0) | -50.1% (-55% to -44.3%)   |
| 38 | Sri Lanka | Pedestrian road injuries                        | 0 (0 to 0)   | 0 (0 to 0) | -12.3% (-19.1% to -4.9%)  |
| 39 | Sri Lanka | Physical violence by firearm                    | 0 (0 to 0)   | 0 (0 to 0) | 30% (13.5% to 49.5%)      |
| 40 | Sri Lanka | Physical violence by other means                | 0 (0 to 1)   | 0 (0 to 0) | -24.7% (-31.8% to -17.5%) |
| 41 | Sri Lanka | Physical violence by sharp object               | 0 (0 to 0)   | 0 (0 to 0) | -35.5% (-43.7% to -28.3%) |
| 42 | Sri Lanka | Poisoning by carbon monoxide                    | 0 (0 to 0)   | 0 (0 to 0) | 12% (-0.4% to 25.1%)      |
| 43 | Sri Lanka | Poisoning by other means                        | 0 (0 to 0)   | 0 (0 to 0) | -25.3% (-32.5% to -17.4%) |
| 44 | Sri Lanka | Pulmonary aspiration and foreign body in airway | 0 (0 to 0)   | 0 (0 to 0) | -5% (-12.4% to 3.8%)      |
| 45 |           |                                                 |              |            |                           |
| 46 |           |                                                 |              |            |                           |

|    |           |                                                 |             |            |                           |
|----|-----------|-------------------------------------------------|-------------|------------|---------------------------|
| 1  |           |                                                 |             |            |                           |
| 2  | Sri Lanka | Self-harm by firearm                            | 0 (0 to 0)  | 0 (0 to 0) | -33.3% (-51% to -15.8%)   |
| 3  | Sri Lanka | Self-harm by other specified means              | 1 (0 to 1)  | 0 (0 to 1) | -45.4% (-49.2% to -41.2%) |
| 4  | Sri Lanka | Unintentional firearm injuries                  | 0 (0 to 0)  | 0 (0 to 0) | -37.6% (-47.4% to -30%)   |
| 5  | Sri Lanka | Venomous animal contact                         | 0 (0 to 0)  | 0 (0 to 0) | -51.8% (-57.9% to -45.4%) |
| 6  | Sudan     | Adverse effects of medical treatment            | 0 (0 to 0)  | 0 (0 to 0) | 0% (0% to 0%)             |
| 7  | Sudan     | Conflict and terrorism                          | 8 (1 to 24) | 0 (0 to 0) | NA                        |
| 8  | Sudan     | Cyclist road injuries                           | 0 (0 to 1)  | 0 (0 to 1) | 8.5% (1.7% to 17.1%)      |
| 9  | Sudan     | Drowning                                        | 0 (0 to 0)  | 0 (0 to 0) | 0.6% (-11.9% to 13.8%)    |
| 10 | Sudan     | Environmental heat and cold exposure            | 0 (0 to 0)  | 0 (0 to 0) | 1.9% (-3.5% to 7.7%)      |
| 11 | Sudan     | Executions and police conflict                  | 0 (0 to 0)  | 0 (0 to 1) | NA                        |
| 12 | Sudan     | Exposure to forces of nature                    | 0 (0 to 0)  | 0 (0 to 0) | NA                        |
| 13 | Sudan     | Falls                                           | 4 (2 to 5)  | 4 (3 to 6) | 24.2% (19.5% to 28.6%)    |
| 14 | Sudan     | Fire, heat, and hot substances                  | 0 (0 to 0)  | 0 (0 to 0) | -32.5% (-37.4% to -28%)   |
| 15 | Sudan     | Foreign body in eyes                            | 0 (0 to 0)  | 0 (0 to 0) | 0% (0% to 0%)             |
| 16 | Sudan     | Foreign body in other body part                 | 0 (0 to 1)  | 0 (0 to 1) | -1.4% (-4.2% to 1.6%)     |
| 17 | Sudan     | Motor vehicle road injuries                     | 1 (0 to 2)  | 1 (0 to 2) | -7.5% (-13.5% to -1.1%)   |
| 18 | Sudan     | Motorcyclist road injuries                      | 0 (0 to 1)  | 0 (0 to 1) | -1.5% (-10.4% to 8.5%)    |
| 19 | Sudan     | Non-venomous animal contact                     | 0 (0 to 0)  | 0 (0 to 0) | -9.8% (-14% to -5.3%)     |
| 20 | Sudan     | Other exposure to mechanical forces             | 0 (0 to 1)  | 0 (0 to 1) | -10.4% (-15.7% to -5.3%)  |
| 21 | Sudan     | Other road injuries                             | 0 (0 to 0)  | 0 (0 to 0) | 13.7% (5.1% to 23.6%)     |
| 22 | Sudan     | Other transport injuries                        | 0 (0 to 0)  | 0 (0 to 0) | 0.6% (-3.7% to 4.8%)      |
| 23 | Sudan     | Other unintentional injuries                    | 1 (0 to 1)  | 1 (0 to 1) | -22.6% (-26.3% to -18.3%) |
| 24 | Sudan     | Pedestrian road injuries                        | 1 (0 to 1)  | 1 (0 to 1) | -21.7% (-27.4% to -15.4%) |
| 25 | Sudan     | Physical violence by firearm                    | 0 (0 to 0)  | 0 (0 to 0) | 176.5% (132.2% to 245.9%) |
| 26 | Sudan     | Physical violence by other means                | 0 (0 to 0)  | 0 (0 to 0) | 73.8% (55.5% to 99%)      |
| 27 | Sudan     | Physical violence by sharp object               | 0 (0 to 0)  | 0 (0 to 0) | 54.7% (31% to 85.7%)      |
| 28 | Sudan     | Poisoning by carbon monoxide                    | 0 (0 to 0)  | 0 (0 to 0) | 18.6% (2.8% to 36.9%)     |
| 29 | Sudan     | Poisoning by other means                        | 0 (0 to 0)  | 0 (0 to 0) | -31.7% (-38.5% to -24.5%) |
| 30 | Sudan     | Pulmonary aspiration and foreign body in airway | 0 (0 to 0)  | 0 (0 to 0) | -27.7% (-35.7% to -20.1%) |
| 31 | Sudan     | Self-harm by firearm                            | 0 (0 to 0)  | 0 (0 to 0) | 27.6% (15.5% to 43%)      |
| 32 | Sudan     | Self-harm by other specified means              | 0 (0 to 0)  | 0 (0 to 0) | -1.1% (-6.8% to 5.6%)     |
| 33 | Sudan     | Unintentional firearm injuries                  | 0 (0 to 0)  | 0 (0 to 0) | -13.8% (-21.8% to -6.1%)  |
| 34 | Sudan     | Venomous animal contact                         | 0 (0 to 0)  | 0 (0 to 0) | -14.1% (-20.7% to -7.4%)  |
| 35 | Suriname  | Adverse effects of medical treatment            | 0 (0 to 0)  | 0 (0 to 0) | 0% (0% to 0%)             |
| 36 | Suriname  | Conflict and terrorism                          | 0 (0 to 0)  | 0 (0 to 0) | NA                        |
| 37 | Suriname  | Cyclist road injuries                           | 0 (0 to 1)  | 0 (0 to 0) | -20.3% (-29% to -10.1%)   |
| 38 | Suriname  | Drowning                                        | 0 (0 to 0)  | 0 (0 to 0) | 13.9% (3.2% to 27.6%)     |
| 39 | Suriname  | Environmental heat and cold exposure            | 0 (0 to 1)  | 0 (0 to 1) | 6.6% (2.3% to 10.2%)      |
| 40 | Suriname  | Executions and police conflict                  | 0 (0 to 0)  | 0 (0 to 0) | NA                        |
| 41 | Suriname  | Exposure to forces of nature                    | 0 (0 to 0)  | 0 (0 to 0) | NA                        |
| 42 | Suriname  | Falls                                           | 1 (1 to 1)  | 1 (1 to 2) | 47.1% (41.7% to 53%)      |
| 43 | Suriname  | Fire, heat, and hot substances                  | 0 (0 to 0)  | 0 (0 to 0) | -10% (-15.6% to -4.7%)    |
| 44 | Suriname  | Foreign body in eyes                            | 0 (0 to 0)  | 0 (0 to 0) | 0% (0% to 0%)             |
| 45 |           |                                                 |             |            |                           |
| 46 |           |                                                 |             |            |                           |

|    |          |                                                 |               |               |                           |
|----|----------|-------------------------------------------------|---------------|---------------|---------------------------|
| 1  |          |                                                 |               |               |                           |
| 2  | Suriname | Foreign body in other body part                 | 0 (0 to 0)    | 0 (0 to 0)    | 9.3% (3.7% to 14.8%)      |
| 3  | Suriname | Motor vehicle road injuries                     | 1 (0 to 1)    | 1 (0 to 1)    | -9.7% (-18.2% to -0.4%)   |
| 4  | Suriname | Motorcyclist road injuries                      | 0 (0 to 0)    | 0 (0 to 1)    | 31.5% (15% to 50%)        |
| 5  | Suriname | Non-venomous animal contact                     | 0 (0 to 0)    | 0 (0 to 0)    | 21.8% (11.1% to 33.1%)    |
| 6  | Suriname | Other exposure to mechanical forces             | 0 (0 to 0)    | 0 (0 to 1)    | 16.7% (8.9% to 24.8%)     |
| 7  | Suriname | Other road injuries                             | 0 (0 to 0)    | 0 (0 to 0)    | -1.3% (-12% to 10%)       |
| 8  | Suriname | Other transport injuries                        | 0 (0 to 0)    | 0 (0 to 0)    | 17.2% (11.5% to 23.8%)    |
| 9  | Suriname | Other unintentional injuries                    | 0 (0 to 0)    | 0 (0 to 0)    | 1.9% (-2.8% to 6.1%)      |
| 10 | Suriname | Pedestrian road injuries                        | 0 (0 to 0)    | 0 (0 to 0)    | -21.4% (-29.3% to -13.1%) |
| 11 | Suriname | Physical violence by firearm                    | 0 (0 to 0)    | 0 (0 to 0)    | 69.1% (51.9% to 90.5%)    |
| 12 | Suriname | Physical violence by other means                | 0 (0 to 0)    | 0 (0 to 0)    | 10.5% (1.4% to 20%)       |
| 13 | Suriname | Physical violence by sharp object               | 0 (0 to 0)    | 0 (0 to 0)    | 6.7% (-4.7% to 16.5%)     |
| 14 | Suriname | Poisoning by carbon monoxide                    | 0 (0 to 0)    | 0 (0 to 0)    | 28.2% (12.7% to 45.8%)    |
| 15 | Suriname | Poisoning by other means                        | 0 (0 to 0)    | 0 (0 to 0)    | -13.2% (-22.9% to -3%)    |
| 16 | Suriname | Pulmonary aspiration and foreign body in airway | 0 (0 to 0)    | 0 (0 to 0)    | -24.6% (-32.4% to -14.5%) |
| 17 | Suriname | Self-harm by firearm                            | 0 (0 to 0)    | 0 (0 to 0)    | 14.2% (-1.4% to 29.9%)    |
| 18 | Suriname | Self-harm by other specified means              | 0 (0 to 0)    | 0 (0 to 0)    | -2.3% (-9.3% to 4.7%)     |
| 19 | Suriname | Unintentional firearm injuries                  | 0 (0 to 0)    | 0 (0 to 0)    | 12% (2.3% to 21.1%)       |
| 20 | Sweden   | Venomous animal contact                         | 0 (0 to 0)    | 0 (0 to 0)    | 41.3% (28.4% to 57.8%)    |
| 21 | Sweden   | Adverse effects of medical treatment            | 0 (0 to 0)    | 0 (0 to 0)    | 0% (0% to 0%)             |
| 22 | Sweden   | Conflict and terrorism                          | 0 (0 to 0)    | 0 (0 to 0)    | NA                        |
| 23 | Sweden   | Cyclist road injuries                           | 1 (0 to 1)    | 0 (0 to 1)    | -37.8% (-42.1% to -32.9%) |
| 24 | Sweden   | Drowning                                        | 0 (0 to 0)    | 0 (0 to 0)    | -4.6% (-10.3% to 1.6%)    |
| 25 | Sweden   | Environmental heat and cold exposure            | 0 (0 to 0)    | 0 (0 to 0)    | -13% (-17.2% to -9.5%)    |
| 26 | Sweden   | Executions and police conflict                  | 0 (0 to 0)    | 0 (0 to 0)    | NA                        |
| 27 | Sweden   | Exposure to forces of nature                    | 0 (0 to 0)    | 0 (0 to 0)    | NA                        |
| 28 | Sweden   | Falls                                           | 17 (11 to 27) | 19 (12 to 29) | 10.2% (6.3% to 14.3%)     |
| 29 | Sweden   | Fire, heat, and hot substances                  | 0 (0 to 0)    | 0 (0 to 0)    | -22.2% (-25.9% to -18.4%) |
| 30 | Sweden   | Foreign body in eyes                            | 0 (0 to 0)    | 0 (0 to 0)    | 0% (0% to 0%)             |
| 31 | Sweden   | Foreign body in other body part                 | 1 (0 to 1)    | 1 (0 to 1)    | 0.6% (-2.5% to 3.5%)      |
| 32 | Sweden   | Motor vehicle road injuries                     | 1 (0 to 2)    | 0 (0 to 1)    | -52.3% (-56.1% to -48.5%) |
| 33 | Sweden   | Motorcyclist road injuries                      | 0 (0 to 1)    | 0 (0 to 1)    | -18.4% (-25.1% to -10.4%) |
| 34 | Sweden   | Non-venomous animal contact                     | 0 (0 to 0)    | 0 (0 to 0)    | -10.1% (-13% to -7.3%)    |
| 35 | Sweden   | Other exposure to mechanical forces             | 1 (0 to 2)    | 1 (0 to 1)    | -13.3% (-17.6% to -9.6%)  |
| 36 | Sweden   | Other road injuries                             | 0 (0 to 0)    | 0 (0 to 0)    | -16.9% (-23.4% to -9%)    |
| 37 | Sweden   | Other transport injuries                        | 0 (0 to 1)    | 0 (0 to 1)    | -26.2% (-29.5% to -22.2%) |
| 38 | Sweden   | Other unintentional injuries                    | 1 (1 to 1)    | 1 (1 to 1)    | -2.1% (-5.3% to 1.2%)     |
| 39 | Sweden   | Pedestrian road injuries                        | 0 (0 to 1)    | 0 (0 to 0)    | -28.5% (-34.4% to -22.2%) |
| 40 | Sweden   | Physical violence by firearm                    | 0 (0 to 0)    | 0 (0 to 0)    | 30.9% (19.9% to 43.4%)    |
| 41 | Sweden   | Physical violence by other means                | 0 (0 to 1)    | 0 (0 to 1)    | 2.6% (-2% to 7%)          |
| 42 | Sweden   | Physical violence by sharp object               | 0 (0 to 0)    | 0 (0 to 0)    | -4.6% (-11.5% to 2.1%)    |
| 43 | Sweden   | Poisoning by carbon monoxide                    | 0 (0 to 0)    | 0 (0 to 0)    | 16.2% (7.7% to 25.3%)     |
| 44 | Sweden   | Poisoning by other means                        | 0 (0 to 0)    | 0 (0 to 0)    | -32.3% (-37.8% to -27.7%) |
| 45 |          |                                                 |               |               |                           |
| 46 |          |                                                 |               |               |                           |

|    |                      |                                                 |              |              |                           |
|----|----------------------|-------------------------------------------------|--------------|--------------|---------------------------|
| 1  |                      |                                                 |              |              |                           |
| 2  | Sweden               | Pulmonary aspiration and foreign body in airway | 0 (0 to 0)   | 0 (0 to 0)   | -15.5% (-21.4% to -9.3%)  |
| 3  | Sweden               | Self-harm by firearm                            | 0 (0 to 0)   | 0 (0 to 0)   | -29.7% (-36.9% to -23.1%) |
| 4  | Sweden               | Self-harm by other specified means              | 0 (0 to 0)   | 0 (0 to 0)   | -27.1% (-30.2% to -23.6%) |
| 5  | Sweden               | Unintentional firearm injuries                  | 0 (0 to 0)   | 0 (0 to 0)   | 3% (-3.5% to 10.1%)       |
| 6  | Sweden               | Venomous animal contact                         | 0 (0 to 0)   | 0 (0 to 0)   | -9.2% (-14% to -4.2%)     |
| 7  | Switzerland          | Adverse effects of medical treatment            | 0 (0 to 0)   | 0 (0 to 0)   | 0% (0% to 0%)             |
| 8  | Switzerland          | Conflict and terrorism                          | 0 (0 to 0)   | 0 (0 to 0)   | NA                        |
| 9  | Switzerland          | Cyclist road injuries                           | 0 (0 to 1)   | 0 (0 to 0)   | -35.5% (-43.8% to -26.2%) |
| 10 | Switzerland          | Drowning                                        | 0 (0 to 0)   | 0 (0 to 0)   | 34.1% (20.5% to 45.8%)    |
| 11 | Switzerland          | Environmental heat and cold exposure            | 0 (0 to 0)   | 0 (0 to 0)   | 1.8% (-2.5% to 6.5%)      |
| 12 | Switzerland          | Executions and police conflict                  | 0 (0 to 0)   | 0 (0 to 0)   | NA                        |
| 13 | Switzerland          | Exposure to forces of nature                    | 0 (0 to 0)   | 0 (0 to 0)   | NA                        |
| 14 | Switzerland          | Falls                                           | 10 (7 to 13) | 9 (6 to 12)  | -11% (-15.1% to -6.8%)    |
| 15 | Switzerland          | Fire, heat, and hot substances                  | 0 (0 to 0)   | 0 (0 to 0)   | 2.1% (-2.7% to 6.2%)      |
| 16 | Switzerland          | Foreign body in eyes                            | 0 (0 to 0)   | 0 (0 to 0)   | 0% (0% to 0%)             |
| 17 | Switzerland          | Foreign body in other body part                 | 0 (0 to 0)   | 0 (0 to 0)   | 5.2% (1.5% to 8.6%)       |
| 18 | Switzerland          | Motor vehicle road injuries                     | 1 (0 to 1)   | 0 (0 to 1)   | -47.6% (-54.5% to -39.9%) |
| 19 | Switzerland          | Motorcyclist road injuries                      | 0 (0 to 0)   | 0 (0 to 0)   | -48.7% (-57.3% to -39.1%) |
| 20 | Switzerland          | Non-venomous animal contact                     | 0 (0 to 0)   | 0 (0 to 0)   | 3.7% (-0.5% to 8.2%)      |
| 21 | Switzerland          | Other exposure to mechanical forces             | 1 (0 to 2)   | 1 (0 to 1)   | -31% (-39.7% to -23.6%)   |
| 22 | Switzerland          | Other road injuries                             | 0 (0 to 0)   | 0 (0 to 0)   | -22.5% (-33.1% to -10.8%) |
| 23 | Switzerland          | Other transport injuries                        | 0 (0 to 0)   | 0 (0 to 0)   | -33% (-39% to -26.4%)     |
| 24 | Switzerland          | Other unintentional injuries                    | 0 (0 to 1)   | 0 (0 to 0)   | -49.2% (-55.6% to -42.1%) |
| 25 | Switzerland          | Pedestrian road injuries                        | 0 (0 to 0)   | 0 (0 to 0)   | -44.9% (-54.1% to -34.2%) |
| 26 | Switzerland          | Physical violence by firearm                    | 0 (0 to 0)   | 0 (0 to 0)   | 9.5% (-2.3% to 24%)       |
| 27 | Switzerland          | Physical violence by other means                | 0 (0 to 0)   | 0 (0 to 0)   | -20% (-27.4% to -12.5%)   |
| 28 | Switzerland          | Physical violence by sharp object               | 0 (0 to 0)   | 0 (0 to 0)   | -23.1% (-32.9% to -13.5%) |
| 29 | Switzerland          | Poisoning by carbon monoxide                    | 0 (0 to 0)   | 0 (0 to 0)   | 17.6% (8.6% to 26.2%)     |
| 30 | Switzerland          | Poisoning by other means                        | 0 (0 to 0)   | 0 (0 to 0)   | 6% (-0.9% to 13%)         |
| 31 | Switzerland          | Pulmonary aspiration and foreign body in airway | 0 (0 to 0)   | 0 (0 to 0)   | 1.5% (-6.4% to 10.9%)     |
| 32 | Switzerland          | Self-harm by firearm                            | 0 (0 to 0)   | 0 (0 to 0)   | -65.1% (-71.9% to -58.7%) |
| 33 | Switzerland          | Self-harm by other specified means              | 1 (0 to 1)   | 0 (0 to 1)   | -47% (-50.2% to -43%)     |
| 34 | Switzerland          | Unintentional firearm injuries                  | 0 (0 to 0)   | 0 (0 to 0)   | -24.1% (-34.9% to -14.4%) |
| 35 | Switzerland          | Venomous animal contact                         | 0 (0 to 0)   | 0 (0 to 0)   | -2.4% (-8.3% to 4.1%)     |
| 36 | Syrian Arab Republic | Adverse effects of medical treatment            | 0 (0 to 0)   | 0 (0 to 0)   | 0% (0% to 0%)             |
| 37 | Syrian Arab Republic | Conflict and terrorism                          | 0 (0 to 1)   | 21 (4 to 64) | NA                        |
| 38 | Syrian Arab Republic | Cyclist road injuries                           | 0 (0 to 0)   | 0 (0 to 0)   | -4% (-11.5% to 4%)        |
| 39 | Syrian Arab Republic | Drowning                                        | 0 (0 to 0)   | 0 (0 to 0)   | 120.8% (82.8% to 163.1%)  |
| 40 | Syrian Arab Republic | Environmental heat and cold exposure            | 0 (0 to 0)   | 0 (0 to 0)   | -6.5% (-11.6% to -1.4%)   |
| 41 | Syrian Arab Republic | Executions and police conflict                  | 0 (0 to 0)   | 1 (0 to 1)   | NA                        |
| 42 | Syrian Arab Republic | Exposure to forces of nature                    | 0 (0 to 0)   | 0 (0 to 0)   | NA                        |
| 43 | Syrian Arab Republic | Falls                                           | 2 (1 to 2)   | 2 (2 to 3)   | 47.8% (41.4% to 54.7%)    |
| 44 | Syrian Arab Republic | Fire, heat, and hot substances                  | 0 (0 to 0)   | 0 (0 to 0)   | -11.7% (-21.5% to -1.8%)  |
| 45 |                      |                                                 |              |              |                           |
| 46 |                      |                                                 |              |              |                           |

|    |                            |                                                 |            |            |                           |
|----|----------------------------|-------------------------------------------------|------------|------------|---------------------------|
| 1  |                            |                                                 |            |            |                           |
| 2  | Syrian Arab Republic       | Foreign body in eyes                            | 0 (0 to 0) | 0 (0 to 0) | 0% (0% to 0%)             |
| 3  | Syrian Arab Republic       | Foreign body in other body part                 | 0 (0 to 0) | 0 (0 to 0) | -4.2% (-7.6% to -0.7%)    |
| 4  | Syrian Arab Republic       | Motor vehicle road injuries                     | 0 (0 to 1) | 0 (0 to 1) | -19.6% (-25.3% to -13.2%) |
| 5  | Syrian Arab Republic       | Motorcyclist road injuries                      | 0 (0 to 0) | 0 (0 to 0) | -9.3% (-17.6% to -0.3%)   |
| 6  | Syrian Arab Republic       | Non-venomous animal contact                     | 0 (0 to 0) | 0 (0 to 0) | 4.7% (0.1% to 8.5%)       |
| 7  | Syrian Arab Republic       | Other exposure to mechanical forces             | 0 (0 to 0) | 0 (0 to 0) | -6.8% (-17.8% to 2.4%)    |
| 8  | Syrian Arab Republic       | Other road injuries                             | 0 (0 to 0) | 0 (0 to 0) | -2.6% (-11.2% to 6.5%)    |
| 9  | Syrian Arab Republic       | Other transport injuries                        | 0 (0 to 0) | 0 (0 to 0) | -4.1% (-7.7% to -0.3%)    |
| 10 | Syrian Arab Republic       | Other unintentional injuries                    | 0 (0 to 0) | 0 (0 to 0) | -6.2% (-14% to 1.9%)      |
| 11 | Syrian Arab Republic       | Pedestrian road injuries                        | 0 (0 to 0) | 0 (0 to 0) | -29.9% (-35.6% to -23.9%) |
| 12 | Syrian Arab Republic       | Physical violence by firearm                    | 0 (0 to 0) | 0 (0 to 0) | 129.3% (98.8% to 171.1%)  |
| 13 | Syrian Arab Republic       | Physical violence by other means                | 0 (0 to 0) | 0 (0 to 0) | 6.6% (-3.3% to 15.9%)     |
| 14 | Syrian Arab Republic       | Physical violence by sharp object               | 0 (0 to 0) | 0 (0 to 0) | -6.6% (-18.2% to 4.1%)    |
| 15 | Syrian Arab Republic       | Poisoning by carbon monoxide                    | 0 (0 to 0) | 0 (0 to 0) | 42.4% (29.4% to 57.4%)    |
| 16 | Syrian Arab Republic       | Poisoning by other means                        | 0 (0 to 0) | 0 (0 to 0) | -10.5% (-17.9% to -1.6%)  |
| 17 | Syrian Arab Republic       | Pulmonary aspiration and foreign body in airway | 0 (0 to 0) | 0 (0 to 0) | -20.5% (-29.2% to -12.5%) |
| 18 | Syrian Arab Republic       | Self-harm by firearm                            | 0 (0 to 0) | 0 (0 to 0) | 39.7% (26.8% to 53.7%)    |
| 19 | Syrian Arab Republic       | Self-harm by other specified means              | 0 (0 to 0) | 0 (0 to 0) | 18% (9.9% to 25.3%)       |
| 20 | Syrian Arab Republic       | Unintentional firearm injuries                  | 0 (0 to 0) | 0 (0 to 0) | -6.3% (-18.3% to 5.1%)    |
| 21 | Syrian Arab Republic       | Venomous animal contact                         | 0 (0 to 0) | 0 (0 to 0) | 7% (-0.8% to 14.8%)       |
| 22 | Taiwan (Province of China) | Adverse effects of medical treatment            | 0 (0 to 0) | 0 (0 to 0) | 0% (0% to 0%)             |
| 23 | Taiwan (Province of China) | Conflict and terrorism                          | 0 (0 to 0) | 0 (0 to 0) | NA                        |
| 24 | Taiwan (Province of China) | Cyclist road injuries                           | 0 (0 to 0) | 0 (0 to 0) | 51.8% (21.8% to 95%)      |
| 25 | Taiwan (Province of China) | Drowning                                        | 0 (0 to 0) | 0 (0 to 0) | 12.4% (-2.5% to 34.4%)    |
| 26 | Taiwan (Province of China) | Environmental heat and cold exposure            | 0 (0 to 0) | 0 (0 to 0) | 5.3% (-0.9% to 12%)       |
| 27 | Taiwan (Province of China) | Executions and police conflict                  | 0 (0 to 0) | 0 (0 to 0) | NA                        |
| 28 | Taiwan (Province of China) | Exposure to forces of nature                    | 0 (0 to 0) | 0 (0 to 0) | NA                        |
| 29 | Taiwan (Province of China) | Falls                                           | 2 (2 to 3) | 2 (1 to 2) | -32.6% (-35.9% to -29.5%) |
| 30 | Taiwan (Province of China) | Fire, heat, and hot substances                  | 0 (0 to 0) | 0 (0 to 0) | -40.6% (-48.6% to -33.1%) |
| 31 | Taiwan (Province of China) | Foreign body in eyes                            | 0 (0 to 0) | 0 (0 to 0) | 0% (0% to 0%)             |
| 32 | Taiwan (Province of China) | Foreign body in other body part                 | 0 (0 to 0) | 0 (0 to 0) | 2% (-1.8% to 6%)          |
| 33 | Taiwan (Province of China) | Motor vehicle road injuries                     | 1 (0 to 1) | 0 (0 to 0) | -66.8% (-73.4% to -59%)   |
| 34 | Taiwan (Province of China) | Motorcyclist road injuries                      | 0 (0 to 1) | 0 (0 to 1) | 61.2% (33.4% to 103.2%)   |
| 35 | Taiwan (Province of China) | Non-venomous animal contact                     | 0 (0 to 0) | 0 (0 to 0) | -23.4% (-26.8% to -19.7%) |
| 36 | Taiwan (Province of China) | Other exposure to mechanical forces             | 0 (0 to 0) | 0 (0 to 0) | 51.9% (37% to 69.4%)      |
| 37 | Taiwan (Province of China) | Other road injuries                             | 0 (0 to 0) | 0 (0 to 0) | 119.8% (70.9% to 185.4%)  |
| 38 | Taiwan (Province of China) | Other transport injuries                        | 0 (0 to 0) | 0 (0 to 0) | 7.5% (2.4% to 12.8%)      |
| 39 | Taiwan (Province of China) | Other unintentional injuries                    | 0 (0 to 0) | 0 (0 to 0) | -75.5% (-79.8% to -70.8%) |
| 40 | Taiwan (Province of China) | Pedestrian road injuries                        | 0 (0 to 0) | 0 (0 to 0) | -13.9% (-28.8% to 3.7%)   |
| 41 | Taiwan (Province of China) | Physical violence by firearm                    | 0 (0 to 0) | 0 (0 to 0) | 35.2% (16.6% to 54.5%)    |
| 42 | Taiwan (Province of China) | Physical violence by other means                | 0 (0 to 0) | 0 (0 to 0) | -13.4% (-25.5% to -0.4%)  |
| 43 | Taiwan (Province of China) | Physical violence by sharp object               | 0 (0 to 0) | 0 (0 to 0) | -51.6% (-62.2% to -40.7%) |
| 44 | Taiwan (Province of China) | Poisoning by carbon monoxide                    | 0 (0 to 0) | 0 (0 to 0) | 69% (44.2% to 99.8%)      |
| 45 |                            |                                                 |            |            |                           |
| 46 |                            |                                                 |            |            |                           |

|    |                            |                                                 |            |            |                           |
|----|----------------------------|-------------------------------------------------|------------|------------|---------------------------|
| 1  |                            |                                                 |            |            |                           |
| 2  | Taiwan (Province of China) | Poisoning by other means                        | 0 (0 to 0) | 0 (0 to 0) | -45.3% (-57.9% to -30.5%) |
| 3  | Taiwan (Province of China) | Pulmonary aspiration and foreign body in airway | 0 (0 to 0) | 0 (0 to 0) | -17.4% (-29.5% to -3.2%)  |
| 4  | Taiwan (Province of China) | Self-harm by firearm                            | 0 (0 to 0) | 0 (0 to 0) | 32.6% (16.5% to 49.6%)    |
| 5  | Taiwan (Province of China) | Self-harm by other specified means              | 0 (0 to 0) | 0 (0 to 0) | 38% (29.2% to 48.4%)      |
| 6  | Taiwan (Province of China) | Unintentional firearm injuries                  | 0 (0 to 0) | 0 (0 to 0) | 14.8% (2.4% to 26.7%)     |
| 7  | Taiwan (Province of China) | Venomous animal contact                         | 0 (0 to 0) | 0 (0 to 0) | -25.1% (-30.5% to -19.7%) |
| 8  | Tajikistan                 | Adverse effects of medical treatment            | 0 (0 to 0) | 0 (0 to 0) | 0% (0% to 0%)             |
| 9  | Tajikistan                 | Conflict and terrorism                          | 0 (0 to 0) | 0 (0 to 0) | NA                        |
| 10 | Tajikistan                 | Cyclist road injuries                           | 0 (0 to 0) | 0 (0 to 0) | -18.1% (-24.9% to -11%)   |
| 11 | Tajikistan                 | Drowning                                        | 0 (0 to 0) | 0 (0 to 0) | -6% (-15.8% to 2.8%)      |
| 12 | Tajikistan                 | Environmental heat and cold exposure            | 0 (0 to 0) | 0 (0 to 0) | 1.4% (-3.6% to 6.7%)      |
| 13 | Tajikistan                 | Executions and police conflict                  | 0 (0 to 0) | 0 (0 to 0) | NA                        |
| 14 | Tajikistan                 | Exposure to forces of nature                    | 0 (0 to 1) | 0 (0 to 0) | NA                        |
| 15 | Tajikistan                 | Falls                                           | 3 (2 to 4) | 2 (2 to 3) | -20.6% (-24.8% to -16.4%) |
| 16 | Tajikistan                 | Fire, heat, and hot substances                  | 0 (0 to 0) | 0 (0 to 0) | -34.7% (-39.7% to -30.2%) |
| 17 | Tajikistan                 | Foreign body in eyes                            | 0 (0 to 0) | 0 (0 to 0) | 0% (0% to 0%)             |
| 18 | Tajikistan                 | Foreign body in other body part                 | 0 (0 to 0) | 0 (0 to 0) | 1.4% (-3% to 5.7%)        |
| 19 | Tajikistan                 | Motor vehicle road injuries                     | 1 (0 to 1) | 1 (0 to 1) | -25.9% (-31% to -21%)     |
| 20 | Tajikistan                 | Motorcyclist road injuries                      | 0 (0 to 0) | 0 (0 to 0) | -45.4% (-51.8% to -38.8%) |
| 21 | Tajikistan                 | Non-venomous animal contact                     | 0 (0 to 0) | 0 (0 to 0) | 12.9% (8.5% to 17.6%)     |
| 22 | Tajikistan                 | Other exposure to mechanical forces             | 1 (0 to 1) | 1 (0 to 1) | 3.8% (-1.5% to 8.9%)      |
| 23 | Tajikistan                 | Other road injuries                             | 0 (0 to 0) | 0 (0 to 0) | -19% (-26.4% to -11%)     |
| 24 | Tajikistan                 | Other transport injuries                        | 0 (0 to 0) | 0 (0 to 0) | -1.8% (-6.3% to 2.8%)     |
| 25 | Tajikistan                 | Other unintentional injuries                    | 0 (0 to 0) | 0 (0 to 0) | -7% (-12.7% to -2.4%)     |
| 26 | Tajikistan                 | Pedestrian road injuries                        | 0 (0 to 0) | 0 (0 to 0) | -18.9% (-25.5% to -11.6%) |
| 27 | Tajikistan                 | Physical violence by firearm                    | 0 (0 to 0) | 0 (0 to 0) | -10.1% (-27% to 9.4%)     |
| 28 | Tajikistan                 | Physical violence by other means                | 0 (0 to 1) | 0 (0 to 0) | -57.6% (-62.8% to -52.1%) |
| 29 | Tajikistan                 | Physical violence by sharp object               | 0 (0 to 0) | 0 (0 to 0) | -55.1% (-61.4% to -47.9%) |
| 30 | Tajikistan                 | Poisoning by carbon monoxide                    | 0 (0 to 0) | 0 (0 to 0) | -7.9% (-27.7% to 13.5%)   |
| 31 | Tajikistan                 | Poisoning by other means                        | 0 (0 to 0) | 0 (0 to 0) | -11.6% (-23.7% to 0.1%)   |
| 32 | Tajikistan                 | Pulmonary aspiration and foreign body in airway | 0 (0 to 0) | 0 (0 to 0) | -0.6% (-8.7% to 7.6%)     |
| 33 | Tajikistan                 | Self-harm by firearm                            | 0 (0 to 0) | 0 (0 to 0) | 3.3% (-11.3% to 20.6%)    |
| 34 | Tajikistan                 | Self-harm by other specified means              | 0 (0 to 0) | 0 (0 to 0) | -5.8% (-10.5% to -0.9%)   |
| 35 | Tajikistan                 | Unintentional firearm injuries                  | 0 (0 to 0) | 0 (0 to 0) | -5.7% (-13% to 1.5%)      |
| 36 | Tajikistan                 | Venomous animal contact                         | 0 (0 to 0) | 0 (0 to 0) | 12.2% (6.2% to 19%)       |
| 37 | Thailand                   | Adverse effects of medical treatment            | 0 (0 to 0) | 0 (0 to 0) | 0% (0% to 0%)             |
| 38 | Thailand                   | Conflict and terrorism                          | 0 (0 to 0) | 0 (0 to 0) | NA                        |
| 39 | Thailand                   | Cyclist road injuries                           | 0 (0 to 0) | 0 (0 to 0) | -20.2% (-28.7% to -10.2%) |
| 40 | Thailand                   | Drowning                                        | 0 (0 to 0) | 0 (0 to 0) | 22.8% (10.2% to 36.4%)    |
| 41 | Thailand                   | Environmental heat and cold exposure            | 0 (0 to 0) | 0 (0 to 0) | 2.9% (-1.7% to 8.3%)      |
| 42 | Thailand                   | Executions and police conflict                  | 0 (0 to 0) | 0 (0 to 0) | NA                        |
| 43 | Thailand                   | Exposure to forces of nature                    | 0 (0 to 0) | 0 (0 to 0) | NA                        |
| 44 | Thailand                   | Falls                                           | 2 (1 to 2) | 2 (2 to 3) | 33.8% (28.4% to 39.5%)    |
| 45 |                            |                                                 |            |            |                           |
| 46 |                            |                                                 |            |            |                           |



|    |             |                                                 |              |            |                           |
|----|-------------|-------------------------------------------------|--------------|------------|---------------------------|
| 1  |             |                                                 |              |            |                           |
| 2  | Thailand    | Fire, heat, and hot substances                  | 0 (0 to 0)   | 0 (0 to 0) | -6.3% (-11.3% to -1.3%)   |
| 3  | Thailand    | Foreign body in eyes                            | 0 (0 to 0)   | 0 (0 to 0) | 0% (0% to 0%)             |
| 4  | Thailand    | Foreign body in other body part                 | 0 (0 to 0)   | 0 (0 to 0) | 3.6% (-2.3% to 9.1%)      |
| 5  | Thailand    | Motor vehicle road injuries                     | 1 (0 to 1)   | 0 (0 to 1) | -26.4% (-33.8% to -18.4%) |
| 6  | Thailand    | Motorcyclist road injuries                      | 1 (1 to 2)   | 1 (0 to 1) | -23.2% (-30% to -15.2%)   |
| 7  | Thailand    | Non-venomous animal contact                     | 0 (0 to 0)   | 0 (0 to 0) | -29.8% (-34.6% to -24.3%) |
| 8  | Thailand    | Other exposure to mechanical forces             | 0 (0 to 0)   | 0 (0 to 0) | -31.2% (-37.8% to -25.1%) |
| 9  | Thailand    | Other road injuries                             | 0 (0 to 0)   | 0 (0 to 0) | -35.2% (-44.7% to -25.1%) |
| 10 | Thailand    | Other transport injuries                        | 0 (0 to 0)   | 0 (0 to 0) | -20.7% (-25.4% to -16.4%) |
| 11 | Thailand    | Other unintentional injuries                    | 0 (0 to 0)   | 0 (0 to 0) | -19.8% (-26% to -13.1%)   |
| 12 | Thailand    | Pedestrian road injuries                        | 0 (0 to 0)   | 0 (0 to 0) | -56.3% (-60.7% to -51.4%) |
| 13 | Thailand    | Physical violence by firearm                    | 0 (0 to 0)   | 0 (0 to 0) | -34.5% (-42.4% to -24.4%) |
| 14 | Thailand    | Physical violence by other means                | 0 (0 to 1)   | 0 (0 to 0) | -43.5% (-48% to -38.7%)   |
| 15 | Thailand    | Physical violence by sharp object               | 0 (0 to 0)   | 0 (0 to 0) | -51.4% (-56.7% to -45.5%) |
| 16 | Thailand    | Poisoning by carbon monoxide                    | 0 (0 to 0)   | 0 (0 to 0) | 30% (16.3% to 46.3%)      |
| 17 | Thailand    | Poisoning by other means                        | 0 (0 to 0)   | 0 (0 to 0) | -9.6% (-17.1% to -1.7%)   |
| 18 | Thailand    | Pulmonary aspiration and foreign body in airway | 0 (0 to 0)   | 0 (0 to 0) | -22.6% (-32.4% to -10.4%) |
| 19 | Thailand    | Self-harm by firearm                            | 0 (0 to 0)   | 0 (0 to 0) | -34.7% (-52.9% to -15.2%) |
| 20 | Thailand    | Self-harm by other specified means              | 0 (0 to 1)   | 0 (0 to 0) | -30.9% (-35.9% to -25.1%) |
| 21 | Thailand    | Unintentional firearm injuries                  | 0 (0 to 0)   | 0 (0 to 0) | -24.8% (-31.8% to -17.3%) |
| 22 | Thailand    | Venomous animal contact                         | 0 (0 to 0)   | 0 (0 to 0) | -39.2% (-46.1% to -32.7%) |
| 23 | Timor-Leste | Adverse effects of medical treatment            | 0 (0 to 0)   | 0 (0 to 0) | 0% (0% to 0%)             |
| 24 | Timor-Leste | Conflict and terrorism                          | 14 (3 to 41) | 0 (0 to 0) | NA                        |
| 25 | Timor-Leste | Cyclist road injuries                           | 0 (0 to 0)   | 0 (0 to 0) | -4.4% (-12.9% to 5.6%)    |
| 26 | Timor-Leste | Drowning                                        | 0 (0 to 0)   | 0 (0 to 0) | -23.8% (-29.6% to -17.9%) |
| 27 | Timor-Leste | Environmental heat and cold exposure            | 0 (0 to 0)   | 0 (0 to 0) | -0.8% (-5.6% to 4.3%)     |
| 28 | Timor-Leste | Executions and police conflict                  | 0 (0 to 0)   | 0 (0 to 0) | NA                        |
| 29 | Timor-Leste | Exposure to forces of nature                    | 0 (0 to 0)   | 0 (0 to 0) | NA                        |
| 30 | Timor-Leste | Falls                                           | 1 (1 to 1)   | 1 (1 to 2) | 54% (48.5% to 59.4%)      |
| 31 | Timor-Leste | Fire, heat, and hot substances                  | 0 (0 to 0)   | 0 (0 to 0) | -22.7% (-28.6% to -17.5%) |
| 32 | Timor-Leste | Foreign body in eyes                            | 0 (0 to 0)   | 0 (0 to 0) | 0% (0% to 0%)             |
| 33 | Timor-Leste | Foreign body in other body part                 | 0 (0 to 0)   | 0 (0 to 0) | -8.5% (-11.7% to -4.7%)   |
| 34 | Timor-Leste | Motor vehicle road injuries                     | 0 (0 to 1)   | 0 (0 to 1) | -7.3% (-16.4% to 1.4%)    |
| 35 | Timor-Leste | Motorcyclist road injuries                      | 0 (0 to 1)   | 0 (0 to 1) | 58.1% (42.1% to 78.3%)    |
| 36 | Timor-Leste | Non-venomous animal contact                     | 0 (0 to 0)   | 0 (0 to 0) | -31.5% (-35.9% to -27.4%) |
| 37 | Timor-Leste | Other exposure to mechanical forces             | 0 (0 to 0)   | 0 (0 to 0) | -17.8% (-23.1% to -13%)   |
| 38 | Timor-Leste | Other road injuries                             | 0 (0 to 0)   | 0 (0 to 0) | -2.5% (-13.1% to 9%)      |
| 39 | Timor-Leste | Other transport injuries                        | 0 (0 to 0)   | 0 (0 to 0) | -2.8% (-7.7% to 2%)       |
| 40 | Timor-Leste | Other unintentional injuries                    | 0 (0 to 0)   | 0 (0 to 0) | -22% (-26.8% to -17%)     |
| 41 | Timor-Leste | Pedestrian road injuries                        | 0 (0 to 0)   | 0 (0 to 0) | -18.7% (-26% to -10.9%)   |
| 42 | Timor-Leste | Physical violence by firearm                    | 0 (0 to 0)   | 0 (0 to 0) | 22.7% (9.3% to 37.3%)     |
| 43 | Timor-Leste | Physical violence by other means                | 0 (0 to 0)   | 0 (0 to 0) | -3.7% (-10.5% to 3.5%)    |
| 44 | Timor-Leste | Physical violence by sharp object               | 0 (0 to 0)   | 0 (0 to 0) | -6.3% (-14.4% to 1.8%)    |
| 45 |             |                                                 |              |            |                           |
| 46 |             |                                                 |              |            |                           |

|    |             |                                                 |            |            |                           |
|----|-------------|-------------------------------------------------|------------|------------|---------------------------|
| 1  |             |                                                 |            |            |                           |
| 2  | Timor-Leste | Poisoning by carbon monoxide                    | 0 (0 to 0) | 0 (0 to 0) | 31% (14.3% to 47.9%)      |
| 3  | Timor-Leste | Poisoning by other means                        | 0 (0 to 0) | 0 (0 to 0) | -13.5% (-19.6% to -6%)    |
| 4  | Timor-Leste | Pulmonary aspiration and foreign body in airway | 0 (0 to 0) | 0 (0 to 0) | -26.1% (-34.2% to -17.3%) |
| 5  | Timor-Leste | Self-harm by firearm                            | 0 (0 to 0) | 0 (0 to 0) | 33.5% (12.1% to 57.1%)    |
| 6  | Timor-Leste | Self-harm by other specified means              | 0 (0 to 0) | 0 (0 to 0) | -12.7% (-17.7% to -6%)    |
| 7  | Timor-Leste | Unintentional firearm injuries                  | 0 (0 to 0) | 0 (0 to 0) | -15.8% (-22% to -9.5%)    |
| 8  | Timor-Leste | Venomous animal contact                         | 0 (0 to 0) | 0 (0 to 0) | -40.5% (-48.1% to -33.4%) |
| 9  | Togo        | Adverse effects of medical treatment            | 0 (0 to 0) | 0 (0 to 0) | 0% (0% to 0%)             |
| 10 | Togo        | Conflict and terrorism                          | 0 (0 to 0) | 0 (0 to 0) | NA                        |
| 11 | Togo        | Cyclist road injuries                           | 1 (1 to 2) | 1 (1 to 3) | 14% (6.7% to 22.8%)       |
| 12 | Togo        | Drowning                                        | 0 (0 to 0) | 0 (0 to 0) | -8.4% (-15.2% to -1.6%)   |
| 13 | Togo        | Environmental heat and cold exposure            | 0 (0 to 0) | 0 (0 to 0) | 3.2% (-1.6% to 8.6%)      |
| 14 | Togo        | Executions and police conflict                  | 0 (0 to 0) | 0 (0 to 0) | NA                        |
| 15 | Togo        | Exposure to forces of nature                    | 0 (0 to 0) | 0 (0 to 0) | NA                        |
| 16 | Togo        | Falls                                           | 3 (2 to 4) | 3 (2 to 5) | 10.9% (7.1% to 15.1%)     |
| 17 | Togo        | Fire, heat, and hot substances                  | 0 (0 to 0) | 0 (0 to 0) | -6.2% (-11.6% to -1.2%)   |
| 18 | Togo        | Foreign body in eyes                            | 0 (0 to 0) | 0 (0 to 0) | 0% (0% to 0%)             |
| 19 | Togo        | Foreign body in other body part                 | 1 (0 to 1) | 1 (0 to 1) | 3.4% (-0.2% to 7.2%)      |
| 20 | Togo        | Motor vehicle road injuries                     | 2 (1 to 3) | 2 (1 to 3) | 3.3% (-4.3% to 11.3%)     |
| 21 | Togo        | Motorcyclist road injuries                      | 1 (0 to 1) | 1 (0 to 2) | 20.8% (11.3% to 30.5%)    |
| 22 | Togo        | Non-venomous animal contact                     | 0 (0 to 0) | 0 (0 to 0) | 2.3% (-2% to 6.5%)        |
| 23 | Togo        | Other exposure to mechanical forces             | 0 (0 to 0) | 0 (0 to 0) | -10.4% (-15.5% to -4.6%)  |
| 24 | Togo        | Other road injuries                             | 0 (0 to 0) | 0 (0 to 0) | 2.7% (-6% to 12.2%)       |
| 25 | Togo        | Other transport injuries                        | 0 (0 to 1) | 0 (0 to 1) | -8.3% (-12.4% to -4.5%)   |
| 26 | Togo        | Other unintentional injuries                    | 0 (0 to 0) | 0 (0 to 0) | -8.9% (-14.1% to -2.6%)   |
| 27 | Togo        | Pedestrian road injuries                        | 2 (1 to 4) | 2 (1 to 3) | -8.6% (-14.7% to -2.5%)   |
| 28 | Togo        | Physical violence by firearm                    | 0 (0 to 0) | 0 (0 to 0) | 34.4% (22.1% to 47.9%)    |
| 29 | Togo        | Physical violence by other means                | 0 (0 to 0) | 0 (0 to 0) | 12.1% (5.7% to 18.8%)     |
| 30 | Togo        | Physical violence by sharp object               | 0 (0 to 0) | 0 (0 to 0) | 12% (3.8% to 21%)         |
| 31 | Togo        | Poisoning by carbon monoxide                    | 0 (0 to 0) | 0 (0 to 0) | 12.9% (-0.5% to 28%)      |
| 32 | Togo        | Poisoning by other means                        | 0 (0 to 0) | 0 (0 to 0) | -14.3% (-22.1% to -6%)    |
| 33 | Togo        | Pulmonary aspiration and foreign body in airway | 0 (0 to 0) | 0 (0 to 0) | -1.3% (-10% to 8.3%)      |
| 34 | Togo        | Self-harm by firearm                            | 0 (0 to 0) | 0 (0 to 0) | 19.2% (7.8% to 32.3%)     |
| 35 | Togo        | Self-harm by other specified means              | 0 (0 to 0) | 0 (0 to 0) | 14.2% (9% to 20.2%)       |
| 36 | Togo        | Unintentional firearm injuries                  | 0 (0 to 0) | 0 (0 to 0) | -12.6% (-19.7% to -5%)    |
| 37 | Togo        | Venomous animal contact                         | 0 (0 to 0) | 0 (0 to 0) | 1.3% (-5.1% to 7.9%)      |
| 38 | Tokelau     | Adverse effects of medical treatment            | 0 (0 to 0) | 0 (0 to 0) | 0% (0% to 0%)             |
| 39 | Tokelau     | Conflict and terrorism                          | 0 (0 to 0) | 0 (0 to 0) | NA                        |
| 40 | Tokelau     | Cyclist road injuries                           | 0 (0 to 1) | 0 (0 to 1) | 11.3% (3.7% to 19.1%)     |
| 41 | Tokelau     | Drowning                                        | 0 (0 to 0) | 0 (0 to 0) | 37.8% (22.8% to 53.2%)    |
| 42 | Tokelau     | Environmental heat and cold exposure            | 0 (0 to 0) | 0 (0 to 0) | -2.7% (-7.5% to 2.6%)     |
| 43 | Tokelau     | Executions and police conflict                  | 0 (0 to 0) | 0 (0 to 0) | NA                        |
| 44 | Tokelau     | Exposure to forces of nature                    | 0 (0 to 0) | 0 (0 to 0) | NA                        |
| 45 |             |                                                 |            |            |                           |
| 46 |             |                                                 |            |            |                           |

|    |         |                                                 |            |            |                           |
|----|---------|-------------------------------------------------|------------|------------|---------------------------|
| 1  |         |                                                 |            |            |                           |
| 2  | Tokelau | Falls                                           | 3 (2 to 4) | 5 (3 to 7) | 62.6% (56% to 68.8%)      |
| 3  | Tokelau | Fire, heat, and hot substances                  | 0 (0 to 0) | 0 (0 to 0) | 14.1% (7.6% to 20.8%)     |
| 4  | Tokelau | Foreign body in eyes                            | 0 (0 to 0) | 0 (0 to 0) | 0% (0% to 0%)             |
| 5  | Tokelau | Foreign body in other body part                 | 0 (0 to 0) | 0 (0 to 0) | -0.5% (-4.1% to 3.5%)     |
| 6  | Tokelau | Motor vehicle road injuries                     | 1 (0 to 2) | 1 (0 to 2) | -8.1% (-14.8% to -1.6%)   |
| 7  | Tokelau | Motorcyclist road injuries                      | 1 (0 to 1) | 1 (0 to 1) | 8.4% (0.3% to 16.8%)      |
| 8  | Tokelau | Non-venomous animal contact                     | 0 (0 to 0) | 0 (0 to 0) | -19.9% (-24.1% to -15.5%) |
| 9  | Tokelau | Other exposure to mechanical forces             | 0 (0 to 0) | 0 (0 to 0) | -11.7% (-16.5% to -6.7%)  |
| 10 | Tokelau | Other road injuries                             | 0 (0 to 0) | 0 (0 to 0) | 12.3% (1.6% to 22.9%)     |
| 11 | Tokelau | Other transport injuries                        | 0 (0 to 1) | 0 (0 to 0) | -7.6% (-12.9% to -2.6%)   |
| 12 | Tokelau | Other unintentional injuries                    | 0 (0 to 0) | 0 (0 to 0) | -7.8% (-12% to -3.5%)     |
| 13 | Tokelau | Pedestrian road injuries                        | 1 (0 to 1) | 1 (0 to 1) | -9.5% (-16.1% to -2.3%)   |
| 14 | Tokelau | Physical violence by firearm                    | 0 (0 to 0) | 0 (0 to 0) | 61.1% (40.1% to 85.6%)    |
| 15 | Tokelau | Physical violence by other means                | 1 (0 to 1) | 1 (0 to 1) | 0.8% (-4.6% to 6%)        |
| 16 | Tokelau | Physical violence by sharp object               | 0 (0 to 0) | 0 (0 to 0) | -12.8% (-21.2% to -3.2%)  |
| 17 | Tokelau | Poisoning by carbon monoxide                    | 0 (0 to 0) | 0 (0 to 0) | 18.7% (6.9% to 30.6%)     |
| 18 | Tokelau | Poisoning by other means                        | 0 (0 to 0) | 0 (0 to 0) | -11.1% (-18.7% to -3.4%)  |
| 19 | Tokelau | Pulmonary aspiration and foreign body in airway | 0 (0 to 0) | 0 (0 to 0) | -12.1% (-21.1% to -3.2%)  |
| 20 | Tokelau | Self-harm by firearm                            | 0 (0 to 0) | 0 (0 to 0) | 6.9% (-6.2% to 25.6%)     |
| 21 | Tokelau | Self-harm by other specified means              | 0 (0 to 0) | 0 (0 to 0) | -9.5% (-14.9% to -3.3%)   |
| 22 | Tokelau | Unintentional firearm injuries                  | 0 (0 to 0) | 0 (0 to 0) | -16.3% (-23.8% to -9.3%)  |
| 23 | Tokelau | Venomous animal contact                         | 0 (0 to 0) | 0 (0 to 0) | -16.8% (-22.5% to -9.3%)  |
| 24 | Tonga   | Adverse effects of medical treatment            | 0 (0 to 0) | 0 (0 to 0) | 0% (0% to 0%)             |
| 25 | Tonga   | Conflict and terrorism                          | 0 (0 to 0) | 0 (0 to 0) | NA                        |
| 26 | Tonga   | Cyclist road injuries                           | 0 (0 to 0) | 0 (0 to 0) | 11.9% (3.9% to 20.4%)     |
| 27 | Tonga   | Drowning                                        | 0 (0 to 0) | 0 (0 to 0) | 26.9% (14% to 42%)        |
| 28 | Tonga   | Environmental heat and cold exposure            | 0 (0 to 0) | 0 (0 to 0) | -1.6% (-6.5% to 4%)       |
| 29 | Tonga   | Executions and police conflict                  | 0 (0 to 0) | 0 (0 to 0) | NA                        |
| 30 | Tonga   | Exposure to forces of nature                    | 0 (0 to 1) | 0 (0 to 0) | NA                        |
| 31 | Tonga   | Falls                                           | 1 (1 to 1) | 1 (1 to 2) | 39% (34.1% to 44.8%)      |
| 32 | Tonga   | Fire, heat, and hot substances                  | 0 (0 to 0) | 0 (0 to 0) | -5.1% (-10% to 0.3%)      |
| 33 | Tonga   | Foreign body in eyes                            | 0 (0 to 0) | 0 (0 to 0) | 0% (0% to 0%)             |
| 34 | Tonga   | Foreign body in other body part                 | 0 (0 to 0) | 0 (0 to 0) | -3.3% (-6.4% to 0.4%)     |
| 35 | Tonga   | Motor vehicle road injuries                     | 0 (0 to 1) | 0 (0 to 1) | 1.5% (-5.5% to 8.7%)      |
| 36 | Tonga   | Motorcyclist road injuries                      | 0 (0 to 0) | 0 (0 to 0) | 14.9% (5.8% to 25.4%)     |
| 37 | Tonga   | Non-venomous animal contact                     | 0 (0 to 0) | 0 (0 to 0) | -13.7% (-17.3% to -9.1%)  |
| 38 | Tonga   | Other exposure to mechanical forces             | 0 (0 to 0) | 0 (0 to 0) | -8.4% (-14% to -2.8%)     |
| 39 | Tonga   | Other road injuries                             | 0 (0 to 0) | 0 (0 to 0) | 10.9% (0.5% to 21.4%)     |
| 40 | Tonga   | Other transport injuries                        | 0 (0 to 0) | 0 (0 to 0) | -11.3% (-15.9% to -6.7%)  |
| 41 | Tonga   | Other unintentional injuries                    | 0 (0 to 0) | 0 (0 to 0) | -14.7% (-18.7% to -10.3%) |
| 42 | Tonga   | Pedestrian road injuries                        | 0 (0 to 0) | 0 (0 to 0) | -9.7% (-16.9% to -1.6%)   |
| 43 | Tonga   | Physical violence by firearm                    | 0 (0 to 0) | 0 (0 to 0) | -24.7% (-39.3% to -6.7%)  |
| 44 | Tonga   | Physical violence by other means                | 1 (0 to 1) | 0 (0 to 0) | -51% (-55.3% to -46.3%)   |
| 45 |         |                                                 |            |            |                           |
| 46 |         |                                                 |            |            |                           |

|    |                     |                                                 |            |            |                           |
|----|---------------------|-------------------------------------------------|------------|------------|---------------------------|
| 1  |                     |                                                 |            |            |                           |
| 2  | Tonga               | Physical violence by sharp object               | 0 (0 to 0) | 0 (0 to 0) | -55.6% (-61.9% to -48.8%) |
| 3  | Tonga               | Poisoning by carbon monoxide                    | 0 (0 to 0) | 0 (0 to 0) | 12.5% (3.3% to 24.1%)     |
| 4  | Tonga               | Poisoning by other means                        | 0 (0 to 0) | 0 (0 to 0) | -15.3% (-21.2% to -9.8%)  |
| 5  | Tonga               | Pulmonary aspiration and foreign body in airway | 0 (0 to 0) | 0 (0 to 0) | -0.8% (-9.2% to 8.9%)     |
| 6  | Tonga               | Self-harm by firearm                            | 0 (0 to 0) | 0 (0 to 0) | 23.9% (11.2% to 41.2%)    |
| 7  | Tonga               | Self-harm by other specified means              | 0 (0 to 0) | 0 (0 to 0) | 13.4% (6.3% to 21.7%)     |
| 8  | Tonga               | Unintentional firearm injuries                  | 0 (0 to 0) | 0 (0 to 0) | -4.4% (-9.9% to 0.9%)     |
| 9  | Trinidad and Tobago | Venomous animal contact                         | 0 (0 to 0) | 0 (0 to 0) | -11.5% (-17% to -5.5%)    |
| 10 | Trinidad and Tobago | Adverse effects of medical treatment            | 0 (0 to 0) | 0 (0 to 0) | 0% (0% to 0%)             |
| 11 | Trinidad and Tobago | Conflict and terrorism                          | 1 (0 to 4) | 0 (0 to 0) | NA                        |
| 12 | Trinidad and Tobago | Cyclist road injuries                           | 0 (0 to 0) | 0 (0 to 0) | -10.4% (-21.1% to 1.5%)   |
| 13 | Trinidad and Tobago | Drowning                                        | 0 (0 to 0) | 0 (0 to 0) | 7% (-5.8% to 21.1%)       |
| 14 | Trinidad and Tobago | Environmental heat and cold exposure            | 0 (0 to 1) | 0 (0 to 1) | 6.9% (2.7% to 11.6%)      |
| 15 | Trinidad and Tobago | Executions and police conflict                  | 0 (0 to 0) | 0 (0 to 0) | NA                        |
| 16 | Trinidad and Tobago | Exposure to forces of nature                    | 0 (0 to 0) | 0 (0 to 0) | NA                        |
| 17 | Trinidad and Tobago | Falls                                           | 1 (1 to 2) | 1 (1 to 2) | 4.4% (-1.1% to 9.9%)      |
| 18 | Trinidad and Tobago | Fire, heat, and hot substances                  | 0 (0 to 0) | 0 (0 to 0) | -7.6% (-13.3% to -1.7%)   |
| 19 | Trinidad and Tobago | Foreign body in eyes                            | 0 (0 to 0) | 0 (0 to 0) | 0% (0% to 0%)             |
| 20 | Trinidad and Tobago | Foreign body in other body part                 | 0 (0 to 0) | 0 (0 to 0) | 1.4% (-3% to 5.9%)        |
| 21 | Trinidad and Tobago | Motor vehicle road injuries                     | 0 (0 to 1) | 1 (0 to 1) | 13% (0.3% to 27.8%)       |
| 22 | Trinidad and Tobago | Motorcyclist road injuries                      | 0 (0 to 0) | 0 (0 to 0) | 42.5% (22.7% to 66.4%)    |
| 23 | Trinidad and Tobago | Non-venomous animal contact                     | 0 (0 to 0) | 0 (0 to 0) | -18.1% (-22.6% to -13.2%) |
| 24 | Trinidad and Tobago | Other exposure to mechanical forces             | 0 (0 to 0) | 0 (0 to 0) | 8.4% (-0.3% to 15.9%)     |
| 25 | Trinidad and Tobago | Other road injuries                             | 0 (0 to 0) | 0 (0 to 0) | -8.4% (-20.1% to 4.7%)    |
| 26 | Trinidad and Tobago | Other transport injuries                        | 0 (0 to 0) | 0 (0 to 0) | 0.2% (-4.4% to 5.2%)      |
| 27 | Trinidad and Tobago | Other unintentional injuries                    | 0 (0 to 0) | 0 (0 to 0) | -2.8% (-8.4% to 2.9%)     |
| 28 | Trinidad and Tobago | Pedestrian road injuries                        | 0 (0 to 0) | 0 (0 to 0) | -38.8% (-47% to -30.3%)   |
| 29 | Trinidad and Tobago | Physical violence by firearm                    | 0 (0 to 0) | 0 (0 to 0) | 268.8% (191.5% to 393.1%) |
| 30 | Trinidad and Tobago | Physical violence by other means                | 0 (0 to 0) | 0 (0 to 0) | 36.7% (20.5% to 55.1%)    |
| 31 | Trinidad and Tobago | Physical violence by sharp object               | 0 (0 to 0) | 0 (0 to 0) | 42.9% (19.9% to 70%)      |
| 32 | Trinidad and Tobago | Poisoning by carbon monoxide                    | 0 (0 to 0) | 0 (0 to 0) | 11% (-3.7% to 27.1%)      |
| 33 | Trinidad and Tobago | Poisoning by other means                        | 0 (0 to 0) | 0 (0 to 0) | -0.8% (-9.4% to 9.1%)     |
| 34 | Trinidad and Tobago | Pulmonary aspiration and foreign body in airway | 0 (0 to 0) | 0 (0 to 0) | -19.6% (-27.5% to -10.2%) |
| 35 | Trinidad and Tobago | Self-harm by firearm                            | 0 (0 to 0) | 0 (0 to 0) | 0.5% (-13.1% to 17.8%)    |
| 36 | Trinidad and Tobago | Self-harm by other specified means              | 0 (0 to 0) | 0 (0 to 0) | -31.3% (-38% to -24.3%)   |
| 37 | Trinidad and Tobago | Unintentional firearm injuries                  | 0 (0 to 0) | 0 (0 to 0) | 16.2% (8.2% to 25.6%)     |
| 38 | Trinidad and Tobago | Venomous animal contact                         | 0 (0 to 0) | 0 (0 to 0) | -15% (-19.9% to -9.8%)    |
| 39 | Tunisia             | Adverse effects of medical treatment            | 0 (0 to 0) | 0 (0 to 0) | 0% (0% to 0%)             |
| 40 | Tunisia             | Conflict and terrorism                          | 0 (0 to 0) | 0 (0 to 0) | NA                        |
| 41 | Tunisia             | Cyclist road injuries                           | 0 (0 to 0) | 0 (0 to 0) | 0.6% (-8.1% to 9.8%)      |
| 42 | Tunisia             | Drowning                                        | 0 (0 to 0) | 0 (0 to 0) | 74% (46.9% to 103.2%)     |
| 43 | Tunisia             | Environmental heat and cold exposure            | 0 (0 to 0) | 0 (0 to 0) | 2.9% (-1.6% to 7.8%)      |
| 44 | Tunisia             | Executions and police conflict                  | 0 (0 to 0) | 0 (0 to 0) | NA                        |
| 45 |                     |                                                 |            |            |                           |
| 46 |                     |                                                 |            |            |                           |

|    |         |                                                 |            |            |                           |
|----|---------|-------------------------------------------------|------------|------------|---------------------------|
| 1  |         |                                                 |            |            |                           |
| 2  | Tunisia | Exposure to forces of nature                    | 0 (0 to 0) | 0 (0 to 0) | NA                        |
| 3  | Tunisia | Falls                                           | 1 (1 to 2) | 2 (1 to 3) | 42.2% (36.8% to 47.7%)    |
| 4  | Tunisia | Fire, heat, and hot substances                  | 0 (0 to 0) | 0 (0 to 0) | -14.8% (-22% to -7.9%)    |
| 5  | Tunisia | Foreign body in eyes                            | 0 (0 to 0) | 0 (0 to 0) | 0% (0% to 0%)             |
| 6  | Tunisia | Foreign body in other body part                 | 0 (0 to 0) | 0 (0 to 0) | -0.8% (-4.4% to 2.6%)     |
| 7  | Tunisia | Motor vehicle road injuries                     | 1 (0 to 1) | 1 (0 to 1) | -2.1% (-9.3% to 5.5%)     |
| 8  | Tunisia | Motorcyclist road injuries                      | 0 (0 to 0) | 0 (0 to 0) | -7% (-16.2% to 1.9%)      |
| 9  | Tunisia | Non-venomous animal contact                     | 0 (0 to 0) | 0 (0 to 0) | -7.3% (-11.5% to -3.3%)   |
| 10 | Tunisia | Other exposure to mechanical forces             | 0 (0 to 1) | 0 (0 to 1) | -17.6% (-22.7% to -12.2%) |
| 11 | Tunisia | Other road injuries                             | 0 (0 to 0) | 0 (0 to 0) | 5.5% (-5.2% to 17.3%)     |
| 12 | Tunisia | Other transport injuries                        | 0 (0 to 0) | 0 (0 to 0) | -0.6% (-5.6% to 4%)       |
| 13 | Tunisia | Other unintentional injuries                    | 0 (0 to 0) | 0 (0 to 0) | -4.2% (-9% to 1.7%)       |
| 14 | Tunisia | Pedestrian road injuries                        | 0 (0 to 1) | 0 (0 to 0) | -22.1% (-29.5% to -15%)   |
| 15 | Tunisia | Physical violence by firearm                    | 0 (0 to 0) | 0 (0 to 0) | 104.2% (77.7% to 137.6%)  |
| 16 | Tunisia | Physical violence by other means                | 0 (0 to 0) | 0 (0 to 0) | -4.7% (-13.3% to 2.6%)    |
| 17 | Tunisia | Physical violence by sharp object               | 0 (0 to 0) | 0 (0 to 0) | -7.5% (-17.8% to 1.2%)    |
| 18 | Tunisia | Poisoning by carbon monoxide                    | 0 (0 to 0) | 0 (0 to 0) | 33.7% (17.9% to 51.2%)    |
| 19 | Tunisia | Poisoning by other means                        | 0 (0 to 0) | 0 (0 to 0) | -15.2% (-23.7% to -6.4%)  |
| 20 | Tunisia | Pulmonary aspiration and foreign body in airway | 0 (0 to 0) | 0 (0 to 0) | -12.3% (-19.5% to -4.6%)  |
| 21 | Tunisia | Self-harm by firearm                            | 0 (0 to 0) | 0 (0 to 0) | 34% (22.4% to 48.6%)      |
| 22 | Tunisia | Self-harm by other specified means              | 0 (0 to 0) | 0 (0 to 0) | 10.6% (4.4% to 17.5%)     |
| 23 | Tunisia | Unintentional firearm injuries                  | 0 (0 to 0) | 0 (0 to 0) | -6% (-14.8% to 5.3%)      |
| 24 | Tunisia | Venomous animal contact                         | 0 (0 to 0) | 0 (0 to 0) | -5.7% (-11.9% to 0.5%)    |
| 25 | Turkey  | Adverse effects of medical treatment            | 0 (0 to 0) | 0 (0 to 0) | 0% (0% to 0%)             |
| 26 | Turkey  | Conflict and terrorism                          | 1 (0 to 2) | 0 (0 to 1) | NA                        |
| 27 | Turkey  | Cyclist road injuries                           | 0 (0 to 0) | 0 (0 to 0) | -8.5% (-16.7% to 0.1%)    |
| 28 | Turkey  | Drowning                                        | 0 (0 to 0) | 0 (0 to 0) | 156.9% (121.1% to 194.6%) |
| 29 | Turkey  | Environmental heat and cold exposure            | 0 (0 to 0) | 0 (0 to 0) | 3.5% (-1.9% to 9.8%)      |
| 30 | Turkey  | Executions and police conflict                  | 0 (0 to 0) | 0 (0 to 0) | NA                        |
| 31 | Turkey  | Exposure to forces of nature                    | 0 (0 to 0) | 0 (0 to 0) | NA                        |
| 32 | Turkey  | Falls                                           | 1 (1 to 2) | 3 (2 to 4) | 110.5% (97.3% to 125.4%)  |
| 33 | Turkey  | Fire, heat, and hot substances                  | 0 (0 to 0) | 0 (0 to 0) | -0.6% (-5.4% to 4.6%)     |
| 34 | Turkey  | Foreign body in eyes                            | 0 (0 to 0) | 0 (0 to 0) | 0% (0% to 0%)             |
| 35 | Turkey  | Foreign body in other body part                 | 0 (0 to 0) | 0 (0 to 0) | -7.9% (-12.6% to -3.9%)   |
| 36 | Turkey  | Motor vehicle road injuries                     | 0 (0 to 1) | 0 (0 to 1) | -15.3% (-22.1% to -7.3%)  |
| 37 | Turkey  | Motorcyclist road injuries                      | 0 (0 to 0) | 0 (0 to 0) | 10.8% (0% to 23.1%)       |
| 38 | Turkey  | Non-venomous animal contact                     | 0 (0 to 0) | 0 (0 to 0) | -17.1% (-21.7% to -12.8%) |
| 39 | Turkey  | Other exposure to mechanical forces             | 0 (0 to 0) | 0 (0 to 0) | -4.4% (-10.7% to 2.6%)    |
| 40 | Turkey  | Other road injuries                             | 0 (0 to 0) | 0 (0 to 0) | -63.3% (-69.9% to -56.6%) |
| 41 | Turkey  | Other transport injuries                        | 0 (0 to 0) | 0 (0 to 0) | -13.3% (-17.6% to -8.5%)  |
| 42 | Turkey  | Other unintentional injuries                    | 0 (0 to 0) | 0 (0 to 0) | -23.9% (-29.8% to -17.3%) |
| 43 | Turkey  | Pedestrian road injuries                        | 0 (0 to 0) | 0 (0 to 0) | -9.9% (-18.3% to -0.7%)   |
| 44 | Turkey  | Physical violence by firearm                    | 0 (0 to 0) | 0 (0 to 0) | 45.7% (22.7% to 75.1%)    |
| 45 |         |                                                 |            |            |                           |
| 46 |         |                                                 |            |            |                           |

|    |              |                                                 |            |            |                           |
|----|--------------|-------------------------------------------------|------------|------------|---------------------------|
| 1  |              |                                                 |            |            |                           |
| 2  | Turkey       | Physical violence by other means                | 0 (0 to 0) | 0 (0 to 0) | -36.4% (-43.7% to -28.8%) |
| 3  | Turkey       | Physical violence by sharp object               | 0 (0 to 0) | 0 (0 to 0) | -32.3% (-40.8% to -23.5%) |
| 4  | Turkey       | Poisoning by carbon monoxide                    | 0 (0 to 0) | 0 (0 to 0) | 46.8% (28.7% to 70.1%)    |
| 5  | Turkey       | Poisoning by other means                        | 0 (0 to 0) | 0 (0 to 0) | -16.9% (-23.9% to -9.7%)  |
| 6  | Turkey       | Pulmonary aspiration and foreign body in airway | 0 (0 to 0) | 0 (0 to 0) | -20.1% (-26.2% to -13.4%) |
| 7  | Turkey       | Self-harm by firearm                            | 0 (0 to 0) | 0 (0 to 0) | -6.8% (-17.8% to 4%)      |
| 8  | Turkey       | Self-harm by other specified means              | 0 (0 to 0) | 0 (0 to 0) | -2.1% (-9.4% to 5.2%)     |
| 9  | Turkey       | Unintentional firearm injuries                  | 0 (0 to 0) | 0 (0 to 0) | -13.2% (-21.8% to -5.7%)  |
| 10 | Turkmenistan | Venomous animal contact                         | 0 (0 to 0) | 0 (0 to 0) | -8.9% (-15.6% to -0.3%)   |
| 11 | Turkmenistan | Adverse effects of medical treatment            | 0 (0 to 0) | 0 (0 to 0) | 0% (0% to 0%)             |
| 12 | Turkmenistan | Conflict and terrorism                          | 0 (0 to 0) | 0 (0 to 0) | NA                        |
| 13 | Turkmenistan | Cyclist road injuries                           | 0 (0 to 0) | 0 (0 to 0) | -15.9% (-24.9% to -5.9%)  |
| 14 | Turkmenistan | Drowning                                        | 0 (0 to 0) | 0 (0 to 0) | 10.5% (-3.7% to 23.4%)    |
| 15 | Turkmenistan | Environmental heat and cold exposure            | 0 (0 to 0) | 0 (0 to 0) | 38% (20.6% to 58.3%)      |
| 16 | Turkmenistan | Executions and police conflict                  | 0 (0 to 0) | 0 (0 to 0) | NA                        |
| 17 | Turkmenistan | Exposure to forces of nature                    | 0 (0 to 0) | 0 (0 to 0) | NA                        |
| 18 | Turkmenistan | Falls                                           | 2 (2 to 3) | 2 (2 to 3) | 6.9% (1.3% to 12.1%)      |
| 19 | Turkmenistan | Fire, heat, and hot substances                  | 0 (0 to 0) | 0 (0 to 0) | -39.7% (-46% to -34.1%)   |
| 20 | Turkmenistan | Foreign body in eyes                            | 0 (0 to 0) | 0 (0 to 0) | 0% (0% to 0%)             |
| 21 | Turkmenistan | Foreign body in other body part                 | 0 (0 to 0) | 0 (0 to 0) | -4.4% (-8.5% to 0.2%)     |
| 22 | Turkmenistan | Motor vehicle road injuries                     | 1 (0 to 1) | 1 (0 to 1) | -32% (-39.6% to -23.1%)   |
| 23 | Turkmenistan | Motorcyclist road injuries                      | 0 (0 to 0) | 0 (0 to 0) | -14.7% (-28.8% to 0.5%)   |
| 24 | Turkmenistan | Non-venomous animal contact                     | 0 (0 to 0) | 0 (0 to 0) | -12.1% (-16.3% to -7.3%)  |
| 25 | Turkmenistan | Other exposure to mechanical forces             | 1 (0 to 1) | 1 (0 to 1) | 33.6% (24.6% to 45.1%)    |
| 26 | Turkmenistan | Other road injuries                             | 0 (0 to 0) | 0 (0 to 0) | -17.1% (-27.3% to -5.2%)  |
| 27 | Turkmenistan | Other transport injuries                        | 0 (0 to 0) | 0 (0 to 0) | 8.3% (3.3% to 13.4%)      |
| 28 | Turkmenistan | Other unintentional injuries                    | 0 (0 to 0) | 0 (0 to 0) | 3% (-2.1% to 8.4%)        |
| 29 | Turkmenistan | Pedestrian road injuries                        | 0 (0 to 1) | 0 (0 to 0) | -50.7% (-57.1% to -43.2%) |
| 30 | Turkmenistan | Physical violence by firearm                    | 0 (0 to 0) | 0 (0 to 0) | 13.6% (-5.6% to 34%)      |
| 31 | Turkmenistan | Physical violence by other means                | 0 (0 to 0) | 0 (0 to 0) | -13.7% (-24% to -3%)      |
| 32 | Turkmenistan | Physical violence by sharp object               | 0 (0 to 0) | 0 (0 to 0) | -17.1% (-27.8% to -4.4%)  |
| 33 | Turkmenistan | Poisoning by carbon monoxide                    | 0 (0 to 0) | 0 (0 to 0) | 44.2% (29.9% to 63.5%)    |
| 34 | Turkmenistan | Poisoning by other means                        | 0 (0 to 0) | 0 (0 to 0) | 2.8% (-5.5% to 12.6%)     |
| 35 | Turkmenistan | Pulmonary aspiration and foreign body in airway | 0 (0 to 0) | 0 (0 to 0) | -13.1% (-19.8% to -5.7%)  |
| 36 | Turkmenistan | Self-harm by firearm                            | 0 (0 to 0) | 0 (0 to 0) | 18% (1.4% to 38.9%)       |
| 37 | Turkmenistan | Self-harm by other specified means              | 0 (0 to 0) | 0 (0 to 0) | 27.9% (20.7% to 35.8%)    |
| 38 | Turkmenistan | Unintentional firearm injuries                  | 0 (0 to 0) | 0 (0 to 0) | 20.2% (8.7% to 33.7%)     |
| 39 | Turkmenistan | Venomous animal contact                         | 0 (0 to 0) | 0 (0 to 0) | -12% (-17.2% to -6%)      |
| 40 | Tuvalu       | Adverse effects of medical treatment            | 0 (0 to 0) | 0 (0 to 0) | 0% (0% to 0%)             |
| 41 | Tuvalu       | Conflict and terrorism                          | 0 (0 to 0) | 0 (0 to 0) | NA                        |
| 42 | Tuvalu       | Cyclist road injuries                           | 0 (0 to 1) | 0 (0 to 1) | 7.6% (-0.7% to 16.6%)     |
| 43 | Tuvalu       | Drowning                                        | 0 (0 to 0) | 0 (0 to 0) | 21.4% (12.6% to 30.7%)    |
| 44 | Tuvalu       | Environmental heat and cold exposure            | 0 (0 to 0) | 0 (0 to 0) | -1.3% (-7.4% to 5.1%)     |
| 45 |              |                                                 |            |            |                           |
| 46 |              |                                                 |            |            |                           |

|    |        |                                                 |            |            |                           |
|----|--------|-------------------------------------------------|------------|------------|---------------------------|
| 1  |        |                                                 |            |            |                           |
| 2  | Tuvalu | Executions and police conflict                  | 0 (0 to 0) | 0 (0 to 0) | NA                        |
| 3  | Tuvalu | Exposure to forces of nature                    | 0 (0 to 0) | 0 (0 to 0) | NA                        |
| 4  | Tuvalu | Falls                                           | 3 (2 to 4) | 4 (3 to 6) | 54.1% (48.1% to 59.5%)    |
| 5  | Tuvalu | Fire, heat, and hot substances                  | 0 (0 to 0) | 0 (0 to 0) | 6.1% (-0.6% to 14.4%)     |
| 6  | Tuvalu | Foreign body in eyes                            | 0 (0 to 0) | 0 (0 to 0) | 0% (0% to 0%)             |
| 7  | Tuvalu | Foreign body in other body part                 | 0 (0 to 0) | 0 (0 to 0) | -0.7% (-4.5% to 3.5%)     |
| 8  | Tuvalu | Motor vehicle road injuries                     | 1 (0 to 2) | 1 (0 to 2) | -8.8% (-16.3% to -0.5%)   |
| 9  | Tuvalu | Motorcyclist road injuries                      | 1 (0 to 1) | 1 (0 to 1) | 10.2% (1.1% to 21.1%)     |
| 10 | Tuvalu | Non-venomous animal contact                     | 0 (0 to 0) | 0 (0 to 0) | -16.2% (-20.2% to -11.7%) |
| 11 | Tuvalu | Other exposure to mechanical forces             | 0 (0 to 0) | 0 (0 to 0) | -8% (-13.5% to -1.6%)     |
| 12 | Tuvalu | Other road injuries                             | 0 (0 to 0) | 0 (0 to 0) | 12.3% (1.9% to 24.5%)     |
| 13 | Tuvalu | Other transport injuries                        | 0 (0 to 1) | 0 (0 to 0) | -8.3% (-12.5% to -3.5%)   |
| 14 | Tuvalu | Other unintentional injuries                    | 0 (0 to 0) | 0 (0 to 0) | -5.3% (-10.2% to 0.1%)    |
| 15 | Tuvalu | Pedestrian road injuries                        | 1 (0 to 1) | 1 (0 to 1) | -10% (-17.3% to -2.4%)    |
| 16 | Tuvalu | Physical violence by firearm                    | 0 (0 to 0) | 0 (0 to 0) | 22.1% (5.6% to 41.8%)     |
| 17 | Tuvalu | Physical violence by other means                | 1 (0 to 1) | 1 (0 to 1) | 12% (4.5% to 20.1%)       |
| 18 | Tuvalu | Physical violence by sharp object               | 0 (0 to 0) | 0 (0 to 0) | -3.7% (-14% to 6.2%)      |
| 19 | Tuvalu | Poisoning by carbon monoxide                    | 0 (0 to 0) | 0 (0 to 0) | 20% (6.8% to 34%)         |
| 20 | Tuvalu | Poisoning by other means                        | 0 (0 to 0) | 0 (0 to 0) | -9.9% (-18.4% to -1.3%)   |
| 21 | Tuvalu | Pulmonary aspiration and foreign body in airway | 0 (0 to 0) | 0 (0 to 0) | -16.5% (-26% to -6.5%)    |
| 22 | Tuvalu | Self-harm by firearm                            | 0 (0 to 0) | 0 (0 to 0) | 11% (-3.9% to 28.3%)      |
| 23 | Tuvalu | Self-harm by other specified means              | 0 (0 to 0) | 0 (0 to 0) | -15.4% (-22.3% to -7.7%)  |
| 24 | Tuvalu | Unintentional firearm injuries                  | 0 (0 to 0) | 0 (0 to 0) | -20.7% (-29.2% to -13.8%) |
| 25 | Tuvalu | Venomous animal contact                         | 0 (0 to 0) | 0 (0 to 0) | -7.4% (-14.5% to 2.3%)    |
| 26 | Uganda | Adverse effects of medical treatment            | 0 (0 to 0) | 0 (0 to 0) | 0% (0% to 0%)             |
| 27 | Uganda | Conflict and terrorism                          | 2 (0 to 5) | 0 (0 to 0) | NA                        |
| 28 | Uganda | Cyclist road injuries                           | 2 (1 to 3) | 2 (1 to 3) | 7.4% (0.2% to 14.9%)      |
| 29 | Uganda | Drowning                                        | 0 (0 to 0) | 0 (0 to 0) | 3.3% (-3.9% to 12.5%)     |
| 30 | Uganda | Environmental heat and cold exposure            | 0 (0 to 0) | 0 (0 to 0) | -1.5% (-6.6% to 3.6%)     |
| 31 | Uganda | Executions and police conflict                  | 0 (0 to 0) | 0 (0 to 0) | NA                        |
| 32 | Uganda | Exposure to forces of nature                    | 0 (0 to 0) | 0 (0 to 0) | NA                        |
| 33 | Uganda | Falls                                           | 3 (2 to 4) | 4 (2 to 5) | 20% (16.1% to 23.7%)      |
| 34 | Uganda | Fire, heat, and hot substances                  | 0 (0 to 0) | 0 (0 to 0) | -5.9% (-10.2% to -1.7%)   |
| 35 | Uganda | Foreign body in eyes                            | 0 (0 to 0) | 0 (0 to 0) | 0% (0% to 0%)             |
| 36 | Uganda | Foreign body in other body part                 | 1 (0 to 1) | 1 (0 to 1) | -9.3% (-12.8% to -6%)     |
| 37 | Uganda | Motor vehicle road injuries                     | 1 (0 to 2) | 1 (1 to 2) | 6.3% (-2.1% to 15.9%)     |
| 38 | Uganda | Motorcyclist road injuries                      | 0 (0 to 1) | 1 (0 to 1) | 9.1% (0.5% to 17.8%)      |
| 39 | Uganda | Non-venomous animal contact                     | 0 (0 to 1) | 0 (0 to 1) | -18.3% (-22.2% to -14.8%) |
| 40 | Uganda | Other exposure to mechanical forces             | 0 (0 to 0) | 0 (0 to 0) | -6.6% (-11.7% to -0.4%)   |
| 41 | Uganda | Other road injuries                             | 0 (0 to 0) | 0 (0 to 0) | -13.8% (-21.3% to -5.7%)  |
| 42 | Uganda | Other transport injuries                        | 0 (0 to 1) | 0 (0 to 1) | -8.3% (-11.9% to -4.4%)   |
| 43 | Uganda | Other unintentional injuries                    | 0 (0 to 0) | 0 (0 to 0) | -7.1% (-12.7% to -1.1%)   |
| 44 | Uganda | Pedestrian road injuries                        | 2 (1 to 3) | 2 (1 to 3) | -5.4% (-12.1% to 1.1%)    |
| 45 |        |                                                 |            |            |                           |
| 46 |        |                                                 |            |            |                           |

|    |                      |                                                 |             |            |                           |
|----|----------------------|-------------------------------------------------|-------------|------------|---------------------------|
| 1  |                      |                                                 |             |            |                           |
| 2  | Uganda               | Physical violence by firearm                    | 0 (0 to 0)  | 0 (0 to 0) | 33.9% (17.3% to 53%)      |
| 3  | Uganda               | Physical violence by other means                | 0 (0 to 0)  | 0 (0 to 0) | 5.9% (-0.2% to 12.5%)     |
| 4  | Uganda               | Physical violence by sharp object               | 0 (0 to 0)  | 0 (0 to 0) | 5.4% (-2.2% to 13.8%)     |
| 5  | Uganda               | Poisoning by carbon monoxide                    | 0 (0 to 0)  | 0 (0 to 0) | 16.4% (3.3% to 30.1%)     |
| 6  | Uganda               | Poisoning by other means                        | 0 (0 to 0)  | 0 (0 to 0) | -12.3% (-19.1% to -4.4%)  |
| 7  | Uganda               | Pulmonary aspiration and foreign body in airway | 0 (0 to 0)  | 0 (0 to 0) | -15.6% (-25.8% to -3.8%)  |
| 8  | Uganda               | Self-harm by firearm                            | 0 (0 to 0)  | 0 (0 to 0) | 19.6% (5.8% to 37.3%)     |
| 9  | Uganda               | Self-harm by other specified means              | 0 (0 to 0)  | 0 (0 to 0) | 5.9% (1.2% to 11.2%)      |
| 10 | Uganda               | Unintentional firearm injuries                  | 0 (0 to 0)  | 0 (0 to 0) | -17.7% (-25.7% to -10.4%) |
| 11 | Ukraine              | Venomous animal contact                         | 0 (0 to 0)  | 0 (0 to 0) | -22.9% (-31% to -15%)     |
| 12 | Ukraine              | Adverse effects of medical treatment            | 0 (0 to 0)  | 0 (0 to 0) | 0% (0% to 0%)             |
| 13 | Ukraine              | Conflict and terrorism                          | 0 (0 to 0)  | 0 (0 to 1) | NA                        |
| 14 | Ukraine              | Cyclist road injuries                           | 1 (0 to 1)  | 0 (0 to 1) | -13.7% (-19.3% to -6.9%)  |
| 15 | Ukraine              | Drowning                                        | 0 (0 to 0)  | 0 (0 to 0) | -48.6% (-53.1% to -43.1%) |
| 16 | Ukraine              | Environmental heat and cold exposure            | 0 (0 to 1)  | 0 (0 to 0) | -7% (-15.6% to 2.5%)      |
| 17 | Ukraine              | Executions and police conflict                  | 0 (0 to 0)  | 0 (0 to 0) | NA                        |
| 18 | Ukraine              | Exposure to forces of nature                    | 0 (0 to 0)  | 0 (0 to 0) | NA                        |
| 19 | Ukraine              | Falls                                           | 7 (5 to 10) | 6 (4 to 8) | -21.3% (-24.1% to -18.2%) |
| 20 | Ukraine              | Fire, heat, and hot substances                  | 0 (0 to 0)  | 0 (0 to 0) | -22.9% (-26.1% to -19.5%) |
| 21 | Ukraine              | Foreign body in eyes                            | 0 (0 to 0)  | 0 (0 to 0) | 0% (0% to 0%)             |
| 22 | Ukraine              | Foreign body in other body part                 | 0 (0 to 0)  | 0 (0 to 0) | -2.2% (-6.3% to 1.7%)     |
| 23 | Ukraine              | Motor vehicle road injuries                     | 2 (1 to 4)  | 2 (1 to 3) | -12.2% (-17% to -6.3%)    |
| 24 | Ukraine              | Motorcyclist road injuries                      | 0 (0 to 1)  | 0 (0 to 0) | -21% (-27.3% to -13.6%)   |
| 25 | Ukraine              | Non-venomous animal contact                     | 0 (0 to 0)  | 0 (0 to 0) | 5.6% (1.7% to 9.5%)       |
| 26 | Ukraine              | Other exposure to mechanical forces             | 1 (0 to 2)  | 1 (0 to 2) | -3.1% (-7.4% to 1.5%)     |
| 27 | Ukraine              | Other road injuries                             | 0 (0 to 0)  | 0 (0 to 0) | -7.3% (-14.4% to 1%)      |
| 28 | Ukraine              | Other transport injuries                        | 0 (0 to 0)  | 0 (0 to 0) | 14.1% (6.3% to 24.5%)     |
| 29 | Ukraine              | Other unintentional injuries                    | 0 (0 to 0)  | 0 (0 to 0) | -2% (-6.2% to 2.4%)       |
| 30 | Ukraine              | Pedestrian road injuries                        | 1 (0 to 1)  | 1 (0 to 1) | -34.1% (-39.1% to -28.8%) |
| 31 | Ukraine              | Physical violence by firearm                    | 0 (0 to 0)  | 0 (0 to 0) | 11.7% (1.6% to 22.9%)     |
| 32 | Ukraine              | Physical violence by other means                | 1 (0 to 1)  | 0 (0 to 1) | -9.2% (-13.7% to -4%)     |
| 33 | Ukraine              | Physical violence by sharp object               | 0 (0 to 0)  | 0 (0 to 0) | -19.2% (-25.1% to -12.9%) |
| 34 | Ukraine              | Poisoning by carbon monoxide                    | 0 (0 to 0)  | 0 (0 to 0) | -39% (-45.8% to -31.4%)   |
| 35 | Ukraine              | Poisoning by other means                        | 0 (0 to 0)  | 0 (0 to 0) | -6.7% (-13.1% to -0.3%)   |
| 36 | Ukraine              | Pulmonary aspiration and foreign body in airway | 0 (0 to 0)  | 0 (0 to 0) | -5.2% (-11.7% to 1.9%)    |
| 37 | Ukraine              | Self-harm by firearm                            | 0 (0 to 0)  | 0 (0 to 0) | -5.2% (-17.8% to 8.8%)    |
| 38 | Ukraine              | Self-harm by other specified means              | 0 (0 to 1)  | 1 (0 to 1) | 39.6% (27.9% to 53.6%)    |
| 39 | Ukraine              | Unintentional firearm injuries                  | 0 (0 to 0)  | 0 (0 to 0) | -5.8% (-12.1% to 0.7%)    |
| 40 | Ukraine              | Venomous animal contact                         | 0 (0 to 0)  | 0 (0 to 0) | 6.1% (0.5% to 11.6%)      |
| 41 | United Arab Emirates | Adverse effects of medical treatment            | 0 (0 to 0)  | 0 (0 to 0) | 0% (0% to 0%)             |
| 42 | United Arab Emirates | Conflict and terrorism                          | 0 (0 to 0)  | 0 (0 to 0) | NA                        |
| 43 | United Arab Emirates | Cyclist road injuries                           | 0 (0 to 0)  | 0 (0 to 0) | -6.6% (-14.9% to 2.7%)    |
| 44 | United Arab Emirates | Drowning                                        | 0 (0 to 0)  | 0 (0 to 0) | 47.3% (23.5% to 76.3%)    |
| 45 |                      |                                                 |             |            |                           |
| 46 |                      |                                                 |             |            |                           |



|    |                      |                                                 |            |             |                           |
|----|----------------------|-------------------------------------------------|------------|-------------|---------------------------|
| 1  |                      |                                                 |            |             |                           |
| 2  | United Arab Emirates | Environmental heat and cold exposure            | 0 (0 to 0) | 0 (0 to 0)  | 1.5% (-3.1% to 6.4%)      |
| 3  | United Arab Emirates | Executions and police conflict                  | 0 (0 to 0) | 0 (0 to 0)  | NA                        |
| 4  | United Arab Emirates | Exposure to forces of nature                    | 0 (0 to 0) | 0 (0 to 0)  | NA                        |
| 5  | United Arab Emirates | Falls                                           | 2 (2 to 3) | 2 (2 to 3)  | 13.9% (9.7% to 18.3%)     |
| 6  | United Arab Emirates | Fire, heat, and hot substances                  | 0 (0 to 0) | 0 (0 to 0)  | -17.6% (-23.1% to -11.1%) |
| 7  | United Arab Emirates | Foreign body in eyes                            | 0 (0 to 0) | 0 (0 to 0)  | 0% (0% to 0%)             |
| 8  | United Arab Emirates | Foreign body in other body part                 | 0 (0 to 0) | 0 (0 to 0)  | -0.2% (-4.8% to 4.4%)     |
| 9  | United Arab Emirates | Motor vehicle road injuries                     | 1 (1 to 2) | 1 (1 to 2)  | -16.4% (-22.3% to -10.1%) |
| 10 | United Arab Emirates | Motorcyclist road injuries                      | 0 (0 to 0) | 0 (0 to 0)  | -11.4% (-20.6% to -0.6%)  |
| 11 | United Arab Emirates | Non-venomous animal contact                     | 0 (0 to 0) | 0 (0 to 0)  | 7% (1.4% to 12%)          |
| 12 | United Arab Emirates | Other exposure to mechanical forces             | 0 (0 to 1) | 0 (0 to 1)  | -15.2% (-21% to -9.9%)    |
| 13 | United Arab Emirates | Other road injuries                             | 0 (0 to 0) | 0 (0 to 0)  | 6.5% (-5.1% to 20.6%)     |
| 14 | United Arab Emirates | Other transport injuries                        | 0 (0 to 0) | 0 (0 to 0)  | 8.2% (3.2% to 13.6%)      |
| 15 | United Arab Emirates | Other unintentional injuries                    | 0 (0 to 0) | 0 (0 to 0)  | -11% (-16.7% to -5.1%)    |
| 16 | United Arab Emirates | Pedestrian road injuries                        | 1 (0 to 1) | 0 (0 to 1)  | -34.8% (-41.6% to -27.7%) |
| 17 | United Arab Emirates | Physical violence by firearm                    | 0 (0 to 0) | 0 (0 to 0)  | 72.7% (49.3% to 101.8%)   |
| 18 | United Arab Emirates | Physical violence by other means                | 0 (0 to 0) | 0 (0 to 0)  | -15.8% (-23.4% to -8.7%)  |
| 19 | United Arab Emirates | Physical violence by sharp object               | 0 (0 to 0) | 0 (0 to 0)  | -14.1% (-24.1% to -4.7%)  |
| 20 | United Arab Emirates | Poisoning by carbon monoxide                    | 0 (0 to 0) | 0 (0 to 0)  | 34.5% (22% to 50.9%)      |
| 21 | United Arab Emirates | Poisoning by other means                        | 0 (0 to 0) | 0 (0 to 0)  | -10.2% (-16.8% to -3%)    |
| 22 | United Arab Emirates | Pulmonary aspiration and foreign body in airway | 0 (0 to 0) | 0 (0 to 0)  | -1.5% (-10.1% to 7.8%)    |
| 23 | United Arab Emirates | Self-harm by firearm                            | 0 (0 to 0) | 0 (0 to 0)  | -0.5% (-10.6% to 11.6%)   |
| 24 | United Arab Emirates | Self-harm by other specified means              | 0 (0 to 0) | 0 (0 to 0)  | 2.5% (-3.3% to 9.2%)      |
| 25 | United Arab Emirates | Unintentional firearm injuries                  | 0 (0 to 0) | 0 (0 to 0)  | -6.9% (-14.1% to 1.5%)    |
| 26 | United Arab Emirates | Venomous animal contact                         | 0 (0 to 0) | 0 (0 to 0)  | 5.1% (-2.9% to 13%)       |
| 27 | United Kingdom       | Adverse effects of medical treatment            | 0 (0 to 0) | 0 (0 to 0)  | 0% (0% to 0%)             |
| 28 | United Kingdom       | Conflict and terrorism                          | 0 (0 to 0) | 0 (0 to 0)  | NA                        |
| 29 | United Kingdom       | Cyclist road injuries                           | 0 (0 to 0) | 0 (0 to 0)  | -25.1% (-29.3% to -21%)   |
| 30 | United Kingdom       | Drowning                                        | 0 (0 to 0) | 0 (0 to 0)  | 1.3% (-2% to 4.7%)        |
| 31 | United Kingdom       | Environmental heat and cold exposure            | 0 (0 to 0) | 0 (0 to 0)  | -26.9% (-32% to -22.3%)   |
| 32 | United Kingdom       | Executions and police conflict                  | 0 (0 to 0) | 0 (0 to 0)  | NA                        |
| 33 | United Kingdom       | Exposure to forces of nature                    | 0 (0 to 0) | 0 (0 to 0)  | NA                        |
| 34 | United Kingdom       | Falls                                           | 6 (4 to 8) | 7 (5 to 10) | 23.2% (20.7% to 25.7%)    |
| 35 | United Kingdom       | Fire, heat, and hot substances                  | 0 (0 to 0) | 0 (0 to 0)  | -25.4% (-29.5% to -21.8%) |
| 36 | United Kingdom       | Foreign body in eyes                            | 0 (0 to 0) | 0 (0 to 0)  | 0% (0% to 0%)             |
| 37 | United Kingdom       | Foreign body in other body part                 | 0 (0 to 0) | 0 (0 to 0)  | -0.1% (-1% to 0.7%)       |
| 38 | United Kingdom       | Motor vehicle road injuries                     | 0 (0 to 1) | 0 (0 to 0)  | -39.5% (-42.9% to -36.4%) |
| 39 | United Kingdom       | Motorcyclist road injuries                      | 0 (0 to 0) | 0 (0 to 0)  | -36.5% (-40.9% to -32.6%) |
| 40 | United Kingdom       | Non-venomous animal contact                     | 0 (0 to 0) | 0 (0 to 0)  | -8.8% (-9.7% to -7.8%)    |
| 41 | United Kingdom       | Other exposure to mechanical forces             | 0 (0 to 1) | 0 (0 to 1)  | -5.2% (-9.9% to -2%)      |
| 42 | United Kingdom       | Other road injuries                             | 0 (0 to 0) | 0 (0 to 0)  | -17.3% (-21.9% to -12.9%) |
| 43 | United Kingdom       | Other transport injuries                        | 0 (0 to 0) | 0 (0 to 0)  | -4.9% (-7% to -3%)        |
| 44 | United Kingdom       | Other unintentional injuries                    | 0 (0 to 1) | 0 (0 to 1)  | -25.5% (-29.9% to -21.2%) |
| 45 |                      |                                                 |            |             |                           |
| 46 |                      |                                                 |            |             |                           |

|    |                             |                                                 |            |            |                           |
|----|-----------------------------|-------------------------------------------------|------------|------------|---------------------------|
| 1  |                             |                                                 |            |            |                           |
| 2  | United Kingdom              | Pedestrian road injuries                        | 0 (0 to 0) | 0 (0 to 0) | -49.9% (-55.1% to -45.1%) |
| 3  | United Kingdom              | Physical violence by firearm                    | 0 (0 to 0) | 0 (0 to 0) | 34.5% (24.3% to 46.4%)    |
| 4  | United Kingdom              | Physical violence by other means                | 0 (0 to 0) | 0 (0 to 0) | -22.7% (-29.3% to -17.4%) |
| 5  | United Kingdom              | Physical violence by sharp object               | 0 (0 to 0) | 0 (0 to 0) | -11.4% (-19.6% to -3.9%)  |
| 6  | United Kingdom              | Poisoning by carbon monoxide                    | 0 (0 to 0) | 0 (0 to 0) | 8.8% (3.3% to 13.9%)      |
| 7  | United Kingdom              | Poisoning by other means                        | 0 (0 to 0) | 0 (0 to 0) | -24.6% (-28.8% to -21.1%) |
| 8  | United Kingdom              | Pulmonary aspiration and foreign body in airway | 0 (0 to 0) | 0 (0 to 0) | -14.7% (-17.3% to -11.8%) |
| 9  | United Kingdom              | Self-harm by firearm                            | 0 (0 to 0) | 0 (0 to 0) | 3.8% (-1.1% to 9.1%)      |
| 10 | United Kingdom              | Self-harm by other specified means              | 0 (0 to 1) | 0 (0 to 0) | -23.9% (-27% to -20.9%)   |
| 11 | United Kingdom              | Unintentional firearm injuries                  | 0 (0 to 0) | 0 (0 to 0) | 2.5% (-1.4% to 6%)        |
| 12 | United Kingdom              | Venomous animal contact                         | 0 (0 to 0) | 0 (0 to 0) | -10.8% (-11.8% to -9.6%)  |
| 13 | United Republic of Tanzania | Adverse effects of medical treatment            | 0 (0 to 0) | 0 (0 to 0) | 0% (0% to 0%)             |
| 14 | United Republic of Tanzania | Conflict and terrorism                          | 0 (0 to 0) | 0 (0 to 0) | NA                        |
| 15 | United Republic of Tanzania | Cyclist road injuries                           | 2 (1 to 3) | 1 (1 to 3) | -2.8% (-9.1% to 4%)       |
| 16 | United Republic of Tanzania | Drowning                                        | 0 (0 to 0) | 0 (0 to 0) | 3.6% (-4.7% to 11.9%)     |
| 17 | United Republic of Tanzania | Environmental heat and cold exposure            | 0 (0 to 0) | 0 (0 to 0) | -1.9% (-6.8% to 2.8%)     |
| 18 | United Republic of Tanzania | Executions and police conflict                  | 0 (0 to 0) | 0 (0 to 0) | NA                        |
| 19 | United Republic of Tanzania | Exposure to forces of nature                    | 0 (0 to 0) | 0 (0 to 0) | NA                        |
| 20 | United Republic of Tanzania | Falls                                           | 3 (2 to 5) | 4 (3 to 6) | 19.3% (15.3% to 23.5%)    |
| 21 | United Republic of Tanzania | Fire, heat, and hot substances                  | 0 (0 to 0) | 0 (0 to 0) | -5.5% (-9.8% to -1.6%)    |
| 22 | United Republic of Tanzania | Foreign body in eyes                            | 0 (0 to 0) | 0 (0 to 0) | 0% (0% to 0%)             |
| 23 | United Republic of Tanzania | Foreign body in other body part                 | 1 (0 to 1) | 1 (0 to 1) | -4.5% (-7.8% to -1.2%)    |
| 24 | United Republic of Tanzania | Motor vehicle road injuries                     | 1 (0 to 2) | 1 (0 to 2) | -1% (-9.9% to 6.9%)       |
| 25 | United Republic of Tanzania | Motorcyclist road injuries                      | 1 (0 to 1) | 0 (0 to 1) | -12.5% (-19.2% to -5.4%)  |
| 26 | United Republic of Tanzania | Non-venomous animal contact                     | 0 (0 to 1) | 0 (0 to 1) | -16.9% (-20.7% to -13.1%) |
| 27 | United Republic of Tanzania | Other exposure to mechanical forces             | 0 (0 to 0) | 0 (0 to 0) | -4.7% (-9.9% to -0.1%)    |
| 28 | United Republic of Tanzania | Other road injuries                             | 0 (0 to 0) | 0 (0 to 0) | -2.1% (-10.6% to 6.7%)    |
| 29 | United Republic of Tanzania | Other transport injuries                        | 0 (0 to 1) | 0 (0 to 0) | -3% (-7% to 1.1%)         |
| 30 | United Republic of Tanzania | Other unintentional injuries                    | 0 (0 to 0) | 0 (0 to 0) | -10% (-15.5% to -4.5%)    |
| 31 | United Republic of Tanzania | Pedestrian road injuries                        | 2 (1 to 3) | 2 (1 to 3) | -7.5% (-13.6% to -1.3%)   |
| 32 | United Republic of Tanzania | Physical violence by firearm                    | 0 (0 to 0) | 0 (0 to 0) | 31.2% (16.8% to 49.1%)    |
| 33 | United Republic of Tanzania | Physical violence by other means                | 0 (0 to 0) | 0 (0 to 0) | 0.7% (-5.1% to 6.3%)      |
| 34 | United Republic of Tanzania | Physical violence by sharp object               | 0 (0 to 0) | 0 (0 to 0) | 0% (-7.8% to 7.8%)        |
| 35 | United Republic of Tanzania | Poisoning by carbon monoxide                    | 0 (0 to 0) | 0 (0 to 0) | 16.5% (4.3% to 29.1%)     |
| 36 | United Republic of Tanzania | Poisoning by other means                        | 0 (0 to 0) | 0 (0 to 0) | -12.5% (-19.3% to -5.2%)  |
| 37 | United Republic of Tanzania | Pulmonary aspiration and foreign body in airway | 0 (0 to 0) | 0 (0 to 0) | -15.4% (-25% to -5.2%)    |
| 38 | United Republic of Tanzania | Self-harm by firearm                            | 0 (0 to 0) | 0 (0 to 0) | 10.3% (0% to 25%)         |
| 39 | United Republic of Tanzania | Self-harm by other specified means              | 0 (0 to 0) | 0 (0 to 0) | -6.6% (-11.2% to -2.1%)   |
| 40 | United Republic of Tanzania | Unintentional firearm injuries                  | 0 (0 to 0) | 0 (0 to 0) | -10.1% (-17.4% to -2.7%)  |
| 41 | United Republic of Tanzania | Venomous animal contact                         | 0 (0 to 0) | 0 (0 to 0) | -16% (-22.9% to -9.1%)    |
| 42 | United States of America    | Adverse effects of medical treatment            | 0 (0 to 0) | 0 (0 to 0) | 0% (0% to 0%)             |
| 43 | United States of America    | Conflict and terrorism                          | 0 (0 to 0) | 0 (0 to 0) | NA                        |
| 44 | United States of America    | Cyclist road injuries                           | 0 (0 to 1) | 0 (0 to 1) | -3.3% (-14.1% to 7.3%)    |
| 45 |                             |                                                 |            |            |                           |
| 46 |                             |                                                 |            |            |                           |

|    |                              |                                                 |              |               |                           |
|----|------------------------------|-------------------------------------------------|--------------|---------------|---------------------------|
| 1  |                              |                                                 |              |               |                           |
| 2  | United States of America     | Drowning                                        | 0 (0 to 0)   | 0 (0 to 0)    | -2.9% (-5.8% to -0.6%)    |
| 3  | United States of America     | Environmental heat and cold exposure            | 0 (0 to 0)   | 0 (0 to 0)    | -6.7% (-10.2% to -3.3%)   |
| 4  | United States of America     | Executions and police conflict                  | 0 (0 to 0)   | 0 (0 to 0)    | NA                        |
| 5  | United States of America     | Exposure to forces of nature                    | 0 (0 to 0)   | 0 (0 to 0)    | NA                        |
| 6  | United States of America     | Falls                                           | 12 (8 to 19) | 15 (10 to 23) | 19.3% (12.9% to 25%)      |
| 7  | United States of America     | Fire, heat, and hot substances                  | 0 (0 to 0)   | 0 (0 to 0)    | -26.6% (-29.9% to -24%)   |
| 8  | United States of America     | Foreign body in eyes                            | 0 (0 to 0)   | 0 (0 to 0)    | 0% (0% to 0%)             |
| 9  | United States of America     | Foreign body in other body part                 | 1 (0 to 1)   | 1 (0 to 1)    | 25.5% (20.7% to 30.7%)    |
| 10 | United States of America     | Motor vehicle road injuries                     | 3 (1 to 5)   | 2 (1 to 4)    | -17.7% (-22% to -13.8%)   |
| 11 | United States of America     | Motorcyclist road injuries                      | 0 (0 to 1)   | 1 (0 to 1)    | 14.2% (3.7% to 25.8%)     |
| 12 | United States of America     | Non-venomous animal contact                     | 0 (0 to 1)   | 0 (0 to 1)    | 13.8% (11% to 17.2%)      |
| 13 | United States of America     | Other exposure to mechanical forces             | 1 (0 to 2)   | 1 (0 to 1)    | -28.5% (-31.6% to -25.9%) |
| 14 | United States of America     | Other road injuries                             | 0 (0 to 0)   | 0 (0 to 0)    | -5.9% (-11.1% to -0.8%)   |
| 15 | United States of America     | Other transport injuries                        | 2 (1 to 3)   | 1 (1 to 2)    | -29.5% (-32.4% to -26.4%) |
| 16 | United States of America     | Other unintentional injuries                    | 1 (1 to 2)   | 1 (1 to 2)    | 15.2% (9.5% to 19.6%)     |
| 17 | United States of America     | Pedestrian road injuries                        | 0 (0 to 1)   | 0 (0 to 1)    | -19.9% (-26.8% to -13.5%) |
| 18 | United States of America     | Physical violence by firearm                    | 0 (0 to 0)   | 0 (0 to 0)    | 1.3% (-6.3% to 10.7%)     |
| 19 | United States of America     | Physical violence by other means                | 1 (0 to 1)   | 0 (0 to 1)    | -16.8% (-20.5% to -12.9%) |
| 20 | United States of America     | Physical violence by sharp object               | 0 (0 to 0)   | 0 (0 to 0)    | -31.5% (-35.7% to -27.8%) |
| 21 | United States of America     | Poisoning by carbon monoxide                    | 0 (0 to 0)   | 0 (0 to 0)    | -0.8% (-4.9% to 2.9%)     |
| 22 | United States of America     | Poisoning by other means                        | 0 (0 to 0)   | 0 (0 to 0)    | -18.9% (-22.1% to -15.3%) |
| 23 | United States of America     | Pulmonary aspiration and foreign body in airway | 0 (0 to 0)   | 0 (0 to 0)    | 9.9% (6.5% to 13.2%)      |
| 24 | United States of America     | Self-harm by firearm                            | 0 (0 to 0)   | 0 (0 to 0)    | -13.6% (-19.2% to -8.3%)  |
| 25 | United States of America     | Self-harm by other specified means              | 0 (0 to 0)   | 0 (0 to 0)    | 13.2% (10% to 16.1%)      |
| 26 | United States of America     | Unintentional firearm injuries                  | 0 (0 to 0)   | 0 (0 to 0)    | -46.3% (-53% to -41.1%)   |
| 27 | United States of America     | Venomous animal contact                         | 0 (0 to 0)   | 0 (0 to 0)    | -4.6% (-9.4% to -0.8%)    |
| 28 | United States Virgin Islands | Adverse effects of medical treatment            | 0 (0 to 0)   | 0 (0 to 0)    | 0% (0% to 0%)             |
| 29 | United States Virgin Islands | Conflict and terrorism                          | 0 (0 to 0)   | 0 (0 to 0)    | NA                        |
| 30 | United States Virgin Islands | Cyclist road injuries                           | 1 (0 to 2)   | 1 (0 to 1)    | -26.3% (-34.6% to -17.7%) |
| 31 | United States Virgin Islands | Drowning                                        | 0 (0 to 0)   | 0 (0 to 0)    | 35.3% (24% to 47.1%)      |
| 32 | United States Virgin Islands | Environmental heat and cold exposure            | 0 (0 to 1)   | 0 (0 to 1)    | -3.5% (-7.1% to -0.1%)    |
| 33 | United States Virgin Islands | Executions and police conflict                  | 0 (0 to 0)   | 0 (0 to 0)    | NA                        |
| 34 | United States Virgin Islands | Exposure to forces of nature                    | 0 (0 to 0)   | 0 (0 to 0)    | NA                        |
| 35 | United States Virgin Islands | Falls                                           | 4 (2 to 5)   | 5 (3 to 7)    | 38.9% (33.9% to 43.8%)    |
| 36 | United States Virgin Islands | Fire, heat, and hot substances                  | 0 (0 to 0)   | 0 (0 to 0)    | 0.4% (-5.1% to 5.1%)      |
| 37 | United States Virgin Islands | Foreign body in eyes                            | 0 (0 to 0)   | 0 (0 to 0)    | 0% (0% to 0%)             |
| 38 | United States Virgin Islands | Foreign body in other body part                 | 0 (0 to 0)   | 0 (0 to 0)    | -1.4% (-5.8% to 3.5%)     |
| 39 | United States Virgin Islands | Motor vehicle road injuries                     | 1 (1 to 2)   | 1 (0 to 1)    | -29.2% (-36.9% to -21.4%) |
| 40 | United States Virgin Islands | Motorcyclist road injuries                      | 1 (0 to 1)   | 1 (0 to 1)    | 8.6% (-3.5% to 23.3%)     |
| 41 | United States Virgin Islands | Non-venomous animal contact                     | 0 (0 to 0)   | 0 (0 to 0)    | -15.2% (-18.9% to -10.8%) |
| 42 | United States Virgin Islands | Other exposure to mechanical forces             | 1 (0 to 1)   | 1 (0 to 1)    | 17.8% (11.5% to 24.4%)    |
| 43 | United States Virgin Islands | Other road injuries                             | 0 (0 to 0)   | 0 (0 to 0)    | -20.1% (-29.8% to -9.1%)  |
| 44 | United States Virgin Islands | Other transport injuries                        | 0 (0 to 1)   | 0 (0 to 1)    | 3.5% (-1.7% to 8.9%)      |
| 45 |                              |                                                 |              |               |                           |
| 46 |                              |                                                 |              |               |                           |

|    |                              |                                                 |            |            |                           |
|----|------------------------------|-------------------------------------------------|------------|------------|---------------------------|
| 1  |                              |                                                 |            |            |                           |
| 2  | United States Virgin Islands | Other unintentional injuries                    | 0 (0 to 1) | 0 (0 to 1) | -3.4% (-8.2% to 1.2%)     |
| 3  | United States Virgin Islands | Pedestrian road injuries                        | 1 (0 to 2) | 1 (0 to 1) | -39% (-45.4% to -32.2%)   |
| 4  | United States Virgin Islands | Physical violence by firearm                    | 0 (0 to 0) | 0 (0 to 0) | 31.7% (10.1% to 61.2%)    |
| 5  | United States Virgin Islands | Physical violence by other means                | 0 (0 to 1) | 0 (0 to 1) | -10.8% (-19.3% to -2.3%)  |
| 6  | United States Virgin Islands | Physical violence by sharp object               | 0 (0 to 0) | 0 (0 to 0) | -28.2% (-39% to -18.2%)   |
| 7  | United States Virgin Islands | Poisoning by carbon monoxide                    | 0 (0 to 0) | 0 (0 to 0) | 10.4% (-1.1% to 23.3%)    |
| 8  | United States Virgin Islands | Poisoning by other means                        | 0 (0 to 0) | 0 (0 to 0) | -7.9% (-15.1% to -0.2%)   |
| 9  | United States Virgin Islands | Pulmonary aspiration and foreign body in airway | 0 (0 to 0) | 0 (0 to 0) | -15.2% (-24.4% to -5.7%)  |
| 10 | United States Virgin Islands | Self-harm by firearm                            | 0 (0 to 0) | 0 (0 to 0) | -1.7% (-11.6% to 11%)     |
| 11 | United States Virgin Islands | Self-harm by other specified means              | 0 (0 to 0) | 0 (0 to 0) | -25.1% (-33.4% to -17%)   |
| 12 | United States Virgin Islands | Unintentional firearm injuries                  | 0 (0 to 0) | 0 (0 to 0) | 16.7% (8.6% to 24.8%)     |
| 13 | United States Virgin Islands | Venomous animal contact                         | 0 (0 to 0) | 0 (0 to 0) | -18.1% (-22.4% to -13.5%) |
| 14 | Uruguay                      | Adverse effects of medical treatment            | 0 (0 to 0) | 0 (0 to 0) | 0% (0% to 0%)             |
| 15 | Uruguay                      | Conflict and terrorism                          | 0 (0 to 0) | 0 (0 to 0) | NA                        |
| 16 | Uruguay                      | Cyclist road injuries                           | 0 (0 to 0) | 0 (0 to 0) | 7.7% (-3.4% to 21.8%)     |
| 17 | Uruguay                      | Drowning                                        | 0 (0 to 0) | 0 (0 to 0) | 10.5% (-3% to 24.5%)      |
| 18 | Uruguay                      | Environmental heat and cold exposure            | 0 (0 to 0) | 0 (0 to 0) | 10.4% (6.2% to 15.4%)     |
| 19 | Uruguay                      | Executions and police conflict                  | 0 (0 to 0) | 0 (0 to 0) | NA                        |
| 20 | Uruguay                      | Exposure to forces of nature                    | 0 (0 to 0) | 0 (0 to 0) | NA                        |
| 21 | Uruguay                      | Falls                                           | 3 (2 to 4) | 3 (2 to 5) | 10.2% (6.6% to 13.8%)     |
| 22 | Uruguay                      | Fire, heat, and hot substances                  | 0 (0 to 0) | 0 (0 to 0) | 9.4% (4.5% to 14.1%)      |
| 23 | Uruguay                      | Foreign body in eyes                            | 0 (0 to 0) | 0 (0 to 0) | 0% (0% to 0%)             |
| 24 | Uruguay                      | Foreign body in other body part                 | 0 (0 to 0) | 0 (0 to 0) | -0.4% (-4.3% to 3.6%)     |
| 25 | Uruguay                      | Motor vehicle road injuries                     | 1 (0 to 1) | 1 (0 to 1) | 2.4% (-7.9% to 13.4%)     |
| 26 | Uruguay                      | Motorcyclist road injuries                      | 0 (0 to 0) | 0 (0 to 0) | 79.1% (56.1% to 110%)     |
| 27 | Uruguay                      | Non-venomous animal contact                     | 0 (0 to 0) | 0 (0 to 0) | -11.4% (-14.9% to -7.7%)  |
| 28 | Uruguay                      | Other exposure to mechanical forces             | 1 (1 to 2) | 1 (0 to 2) | -14.2% (-24.8% to 0.2%)   |
| 29 | Uruguay                      | Other road injuries                             | 0 (0 to 0) | 0 (0 to 0) | -2.9% (-13.9% to 9.6%)    |
| 30 | Uruguay                      | Other transport injuries                        | 0 (0 to 0) | 0 (0 to 0) | 1.7% (-2.5% to 5.7%)      |
| 31 | Uruguay                      | Other unintentional injuries                    | 0 (0 to 1) | 0 (0 to 1) | -24.3% (-29.9% to -18.1%) |
| 32 | Uruguay                      | Pedestrian road injuries                        | 0 (0 to 0) | 0 (0 to 0) | -22.2% (-31.1% to -11.8%) |
| 33 | Uruguay                      | Physical violence by firearm                    | 0 (0 to 0) | 0 (0 to 0) | 167.8% (128.6% to 226.4%) |
| 34 | Uruguay                      | Physical violence by other means                | 0 (0 to 1) | 0 (0 to 1) | 15.6% (0.6% to 31.1%)     |
| 35 | Uruguay                      | Physical violence by sharp object               | 0 (0 to 0) | 0 (0 to 0) | 54.9% (30.7% to 83.5%)    |
| 36 | Uruguay                      | Poisoning by carbon monoxide                    | 0 (0 to 0) | 0 (0 to 0) | 32.7% (20.5% to 46.3%)    |
| 37 | Uruguay                      | Poisoning by other means                        | 0 (0 to 0) | 0 (0 to 0) | -1.5% (-9.2% to 7%)       |
| 38 | Uruguay                      | Pulmonary aspiration and foreign body in airway | 0 (0 to 0) | 0 (0 to 0) | -27.9% (-34.3% to -21.2%) |
| 39 | Uruguay                      | Self-harm by firearm                            | 0 (0 to 0) | 0 (0 to 0) | 17.1% (1.9% to 33%)       |
| 40 | Uruguay                      | Self-harm by other specified means              | 0 (0 to 0) | 0 (0 to 1) | 80% (68.5% to 94.7%)      |
| 41 | Uruguay                      | Unintentional firearm injuries                  | 1 (0 to 2) | 0 (0 to 1) | -52.5% (-60.1% to -44.7%) |
| 42 | Uruguay                      | Venomous animal contact                         | 0 (0 to 0) | 0 (0 to 0) | -16.5% (-21.7% to -11.9%) |
| 43 | Uzbekistan                   | Adverse effects of medical treatment            | 0 (0 to 0) | 0 (0 to 0) | 0% (0% to 0%)             |
| 44 | Uzbekistan                   | Conflict and terrorism                          | 0 (0 to 0) | 0 (0 to 0) | NA                        |
| 45 |                              |                                                 |            |            |                           |
| 46 |                              |                                                 |            |            |                           |

|    |            |                                                 |            |            |                           |
|----|------------|-------------------------------------------------|------------|------------|---------------------------|
| 1  |            |                                                 |            |            |                           |
| 2  | Uzbekistan | Cyclist road injuries                           | 0 (0 to 0) | 0 (0 to 0) | 15.4% (2.8% to 25.9%)     |
| 3  | Uzbekistan | Drowning                                        | 0 (0 to 0) | 0 (0 to 0) | 9.5% (-1.5% to 20.9%)     |
| 4  | Uzbekistan | Environmental heat and cold exposure            | 0 (0 to 0) | 0 (0 to 0) | -21.3% (-29.8% to -13.6%) |
| 5  | Uzbekistan | Executions and police conflict                  | 0 (0 to 0) | 0 (0 to 0) | NA                        |
| 6  | Uzbekistan | Exposure to forces of nature                    | 0 (0 to 0) | 0 (0 to 0) | NA                        |
| 7  | Uzbekistan | Falls                                           | 3 (2 to 3) | 3 (2 to 3) | 0.6% (-4.7% to 5.4%)      |
| 8  | Uzbekistan | Fire, heat, and hot substances                  | 0 (0 to 0) | 0 (0 to 0) | -23.3% (-29.1% to -17.3%) |
| 9  | Uzbekistan | Foreign body in eyes                            | 0 (0 to 0) | 0 (0 to 0) | 0% (0% to 0%)             |
| 10 | Uzbekistan | Foreign body in other body part                 | 0 (0 to 0) | 0 (0 to 0) | -1.9% (-6% to 2.8%)       |
| 11 | Uzbekistan | Motor vehicle road injuries                     | 1 (0 to 1) | 1 (1 to 2) | 24.2% (11.5% to 36.4%)    |
| 12 | Uzbekistan | Motorcyclist road injuries                      | 0 (0 to 0) | 0 (0 to 0) | 6.2% (-7.6% to 20.4%)     |
| 13 | Uzbekistan | Non-venomous animal contact                     | 0 (0 to 0) | 0 (0 to 0) | -11.9% (-16.1% to -7.4%)  |
| 14 | Uzbekistan | Other exposure to mechanical forces             | 0 (0 to 1) | 1 (0 to 1) | 6% (1.4% to 11.2%)        |
| 15 | Uzbekistan | Other road injuries                             | 0 (0 to 0) | 0 (0 to 0) | 11.8% (-2% to 24.3%)      |
| 16 | Uzbekistan | Other transport injuries                        | 0 (0 to 0) | 0 (0 to 0) | 1.6% (-2.7% to 5.9%)      |
| 17 | Uzbekistan | Other unintentional injuries                    | 0 (0 to 1) | 0 (0 to 0) | -19.5% (-26.2% to -12.6%) |
| 18 | Uzbekistan | Pedestrian road injuries                        | 0 (0 to 1) | 0 (0 to 1) | 3.6% (-9.5% to 16.6%)     |
| 19 | Uzbekistan | Physical violence by firearm                    | 0 (0 to 0) | 0 (0 to 0) | 67.7% (43.5% to 98.7%)    |
| 20 | Uzbekistan | Physical violence by other means                | 0 (0 to 0) | 0 (0 to 0) | -23.8% (-34.4% to -12.9%) |
| 21 | Uzbekistan | Physical violence by sharp object               | 0 (0 to 0) | 0 (0 to 0) | -38.7% (-48.5% to -29.5%) |
| 22 | Uzbekistan | Poisoning by carbon monoxide                    | 0 (0 to 0) | 0 (0 to 0) | 23.6% (12.7% to 35.5%)    |
| 23 | Uzbekistan | Poisoning by other means                        | 0 (0 to 0) | 0 (0 to 0) | -2.1% (-7.8% to 5.5%)     |
| 24 | Uzbekistan | Pulmonary aspiration and foreign body in airway | 0 (0 to 0) | 0 (0 to 0) | -11.2% (-18.4% to -3.9%)  |
| 25 | Uzbekistan | Self-harm by firearm                            | 0 (0 to 0) | 0 (0 to 0) | 20.4% (1.1% to 45.7%)     |
| 26 | Uzbekistan | Self-harm by other specified means              | 0 (0 to 0) | 0 (0 to 1) | 73% (59.8% to 85.6%)      |
| 27 | Uzbekistan | Unintentional firearm injuries                  | 0 (0 to 0) | 0 (0 to 0) | 4.4% (-3.4% to 13.5%)     |
| 28 | Uzbekistan | Venomous animal contact                         | 0 (0 to 0) | 0 (0 to 0) | -11.7% (-17.1% to -5.7%)  |
| 29 | Vanuatu    | Adverse effects of medical treatment            | 0 (0 to 0) | 0 (0 to 0) | 0% (0% to 0%)             |
| 30 | Vanuatu    | Conflict and terrorism                          | 0 (0 to 0) | 0 (0 to 0) | NA                        |
| 31 | Vanuatu    | Cyclist road injuries                           | 0 (0 to 0) | 0 (0 to 0) | 6.1% (-0.9% to 13.5%)     |
| 32 | Vanuatu    | Drowning                                        | 0 (0 to 0) | 0 (0 to 0) | -0.2% (-8.3% to 9.3%)     |
| 33 | Vanuatu    | Environmental heat and cold exposure            | 0 (0 to 0) | 0 (0 to 0) | -4.3% (-9.2% to 0.5%)     |
| 34 | Vanuatu    | Executions and police conflict                  | 0 (0 to 0) | 0 (0 to 0) | NA                        |
| 35 | Vanuatu    | Exposure to forces of nature                    | 0 (0 to 0) | 0 (0 to 0) | NA                        |
| 36 | Vanuatu    | Falls                                           | 1 (1 to 1) | 1 (1 to 2) | 38.6% (33% to 44.3%)      |
| 37 | Vanuatu    | Fire, heat, and hot substances                  | 0 (0 to 0) | 0 (0 to 0) | -4.7% (-9.1% to 0.1%)     |
| 38 | Vanuatu    | Foreign body in eyes                            | 0 (0 to 0) | 0 (0 to 0) | 0% (0% to 0%)             |
| 39 | Vanuatu    | Foreign body in other body part                 | 0 (0 to 0) | 0 (0 to 0) | -4.3% (-7.7% to -0.9%)    |
| 40 | Vanuatu    | Motor vehicle road injuries                     | 0 (0 to 1) | 0 (0 to 1) | -0.3% (-7.4% to 6.6%)     |
| 41 | Vanuatu    | Motorcyclist road injuries                      | 0 (0 to 0) | 0 (0 to 0) | 15.7% (5.9% to 26.6%)     |
| 42 | Vanuatu    | Non-venomous animal contact                     | 0 (0 to 0) | 0 (0 to 0) | -15.3% (-19.2% to -11.2%) |
| 43 | Vanuatu    | Other exposure to mechanical forces             | 0 (0 to 0) | 0 (0 to 0) | -13.9% (-19.7% to -7.9%)  |
| 44 | Vanuatu    | Other road injuries                             | 0 (0 to 0) | 0 (0 to 0) | 3.1% (-6% to 12.4%)       |
| 45 |            |                                                 |            |            |                           |
| 46 |            |                                                 |            |            |                           |

|    |                                    |                                                 |            |            |                           |
|----|------------------------------------|-------------------------------------------------|------------|------------|---------------------------|
| 1  |                                    |                                                 |            |            |                           |
| 2  | Vanuatu                            | Other transport injuries                        | 0 (0 to 0) | 0 (0 to 0) | -6.3% (-10.1% to -2.2%)   |
| 3  | Vanuatu                            | Other unintentional injuries                    | 0 (0 to 0) | 0 (0 to 0) | -7% (-11% to -2.5%)       |
| 4  | Vanuatu                            | Pedestrian road injuries                        | 0 (0 to 0) | 0 (0 to 0) | 7.3% (-0.4% to 15.2%)     |
| 5  | Vanuatu                            | Physical violence by firearm                    | 0 (0 to 0) | 0 (0 to 0) | 14.2% (4.3% to 25.6%)     |
| 6  | Vanuatu                            | Physical violence by other means                | 0 (0 to 0) | 0 (0 to 0) | 3.1% (-2.3% to 9.7%)      |
| 7  | Vanuatu                            | Physical violence by sharp object               | 0 (0 to 0) | 0 (0 to 0) | -6.2% (-14% to 1.3%)      |
| 8  | Vanuatu                            | Poisoning by carbon monoxide                    | 0 (0 to 0) | 0 (0 to 0) | 1.6% (-8.8% to 11.5%)     |
| 9  | Vanuatu                            | Poisoning by other means                        | 0 (0 to 0) | 0 (0 to 0) | -17.1% (-23.3% to -10.7%) |
| 10 | Vanuatu                            | Pulmonary aspiration and foreign body in airway | 0 (0 to 0) | 0 (0 to 0) | 1% (-9.9% to 12.7%)       |
| 11 | Vanuatu                            | Self-harm by firearm                            | 0 (0 to 0) | 0 (0 to 0) | -2.5% (-18.1% to 14.3%)   |
| 12 | Vanuatu                            | Self-harm by other specified means              | 0 (0 to 0) | 0 (0 to 0) | 2.6% (-3.7% to 9.5%)      |
| 13 | Vanuatu                            | Unintentional firearm injuries                  | 0 (0 to 0) | 0 (0 to 0) | -23.5% (-29.4% to -18%)   |
| 14 | Vanuatu                            | Venomous animal contact                         | 0 (0 to 0) | 0 (0 to 0) | -8.8% (-15.3% to -1.7%)   |
| 15 | Venezuela (Bolivarian Republic of) | Adverse effects of medical treatment            | 0 (0 to 0) | 0 (0 to 0) | 0% (0% to 0%)             |
| 16 | Venezuela (Bolivarian Republic of) | Conflict and terrorism                          | 0 (0 to 0) | 0 (0 to 0) | NA                        |
| 17 | Venezuela (Bolivarian Republic of) | Cyclist road injuries                           | 0 (0 to 1) | 0 (0 to 0) | -32.9% (-41.1% to -24.2%) |
| 18 | Venezuela (Bolivarian Republic of) | Drowning                                        | 0 (0 to 0) | 0 (0 to 0) | 23.1% (5.1% to 41.7%)     |
| 19 | Venezuela (Bolivarian Republic of) | Environmental heat and cold exposure            | 0 (0 to 0) | 0 (0 to 0) | 0.3% (-4% to 4.2%)        |
| 20 | Venezuela (Bolivarian Republic of) | Executions and police conflict                  | 0 (0 to 0) | 0 (0 to 0) | NA                        |
| 21 | Venezuela (Bolivarian Republic of) | Exposure to forces of nature                    | 0 (0 to 0) | 0 (0 to 0) | NA                        |
| 22 | Venezuela (Bolivarian Republic of) | Falls                                           | 2 (2 to 3) | 2 (2 to 3) | -7.4% (-11.8% to -2.9%)   |
| 23 | Venezuela (Bolivarian Republic of) | Fire, heat, and hot substances                  | 0 (0 to 0) | 0 (0 to 0) | -7.5% (-12.3% to -1.8%)   |
| 24 | Venezuela (Bolivarian Republic of) | Foreign body in eyes                            | 0 (0 to 0) | 0 (0 to 0) | 0% (0% to 0%)             |
| 25 | Venezuela (Bolivarian Republic of) | Foreign body in other body part                 | 0 (0 to 0) | 0 (0 to 0) | -14% (-18.8% to -10%)     |
| 26 | Venezuela (Bolivarian Republic of) | Motor vehicle road injuries                     | 1 (0 to 2) | 1 (0 to 1) | -17.5% (-26.8% to -7.3%)  |
| 27 | Venezuela (Bolivarian Republic of) | Motorcyclist road injuries                      | 0 (0 to 0) | 0 (0 to 0) | 9.3% (-5.3% to 26.3%)     |
| 28 | Venezuela (Bolivarian Republic of) | Non-venomous animal contact                     | 0 (0 to 0) | 0 (0 to 0) | -13.8% (-18.5% to -9.5%)  |
| 29 | Venezuela (Bolivarian Republic of) | Other exposure to mechanical forces             | 0 (0 to 1) | 0 (0 to 1) | 6.4% (-1.3% to 15.9%)     |
| 30 | Venezuela (Bolivarian Republic of) | Other road injuries                             | 0 (0 to 0) | 0 (0 to 0) | -23.7% (-33.4% to -13.3%) |
| 31 | Venezuela (Bolivarian Republic of) | Other transport injuries                        | 0 (0 to 0) | 0 (0 to 0) | 5.3% (0.2% to 11.4%)      |
| 32 | Venezuela (Bolivarian Republic of) | Other unintentional injuries                    | 0 (0 to 0) | 0 (0 to 0) | -20% (-25.4% to -14.1%)   |
| 33 | Venezuela (Bolivarian Republic of) | Pedestrian road injuries                        | 0 (0 to 1) | 0 (0 to 1) | -41.9% (-49.1% to -34.7%) |
| 34 | Venezuela (Bolivarian Republic of) | Physical violence by firearm                    | 0 (0 to 0) | 1 (0 to 1) | 222.6% (148.7% to 336.3%) |
| 35 | Venezuela (Bolivarian Republic of) | Physical violence by other means                | 0 (0 to 0) | 0 (0 to 0) | 22.9% (2.4% to 48%)       |
| 36 | Venezuela (Bolivarian Republic of) | Physical violence by sharp object               | 0 (0 to 0) | 0 (0 to 0) | -11.6% (-30.8% to 7.2%)   |
| 37 | Venezuela (Bolivarian Republic of) | Poisoning by carbon monoxide                    | 0 (0 to 0) | 0 (0 to 0) | 17.1% (5.2% to 30.5%)     |
| 38 | Venezuela (Bolivarian Republic of) | Poisoning by other means                        | 0 (0 to 0) | 0 (0 to 0) | -9.4% (-16.2% to -1.6%)   |
| 39 | Venezuela (Bolivarian Republic of) | Pulmonary aspiration and foreign body in airway | 0 (0 to 0) | 0 (0 to 0) | -29.8% (-37.3% to -21.4%) |
| 40 | Venezuela (Bolivarian Republic of) | Self-harm by firearm                            | 0 (0 to 0) | 0 (0 to 0) | 39.9% (24.7% to 60.4%)    |
| 41 | Venezuela (Bolivarian Republic of) | Self-harm by other specified means              | 0 (0 to 0) | 0 (0 to 0) | 26.2% (15.2% to 36.4%)    |
| 42 | Venezuela (Bolivarian Republic of) | Unintentional firearm injuries                  | 0 (0 to 1) | 0 (0 to 1) | 11.7% (0.3% to 25.4%)     |
| 43 | Venezuela (Bolivarian Republic of) | Venomous animal contact                         | 0 (0 to 0) | 0 (0 to 0) | -7.4% (-12.3% to -1.4%)   |
| 44 | Viet Nam                           | Adverse effects of medical treatment            | 0 (0 to 0) | 0 (0 to 0) | 0% (0% to 0%)             |
| 45 |                                    |                                                 |            |            |                           |
| 46 |                                    |                                                 |            |            |                           |

|    |          |                                                 |            |              |                           |
|----|----------|-------------------------------------------------|------------|--------------|---------------------------|
| 1  |          |                                                 |            |              |                           |
| 2  | Viet Nam | Conflict and terrorism                          | 0 (0 to 0) | 0 (0 to 0)   | NA                        |
| 3  | Viet Nam | Cyclist road injuries                           | 0 (0 to 0) | 0 (0 to 0)   | 38.1% (26.5% to 50.7%)    |
| 4  | Viet Nam | Drowning                                        | 0 (0 to 0) | 0 (0 to 0)   | 40.9% (23.7% to 59.3%)    |
| 5  | Viet Nam | Environmental heat and cold exposure            | 0 (0 to 0) | 0 (0 to 0)   | 1.1% (-4.5% to 6.2%)      |
| 6  | Viet Nam | Executions and police conflict                  | 0 (0 to 0) | 0 (0 to 0)   | NA                        |
| 7  | Viet Nam | Exposure to forces of nature                    | 0 (0 to 0) | 0 (0 to 0)   | NA                        |
| 8  | Viet Nam | Falls                                           | 2 (1 to 2) | 3 (2 to 4)   | 67.6% (61% to 74.1%)      |
| 9  | Viet Nam | Fire, heat, and hot substances                  | 0 (0 to 0) | 0 (0 to 0)   | 14.4% (7.4% to 21.9%)     |
| 10 | Viet Nam | Foreign body in eyes                            | 0 (0 to 0) | 0 (0 to 0)   | 0% (0% to 0%)             |
| 11 | Viet Nam | Foreign body in other body part                 | 0 (0 to 0) | 0 (0 to 0)   | 3.5% (-2.5% to 10.4%)     |
| 12 | Viet Nam | Motor vehicle road injuries                     | 1 (0 to 1) | 1 (0 to 1)   | 24.4% (14.1% to 35.5%)    |
| 13 | Viet Nam | Motorcyclist road injuries                      | 1 (0 to 1) | 1 (0 to 1)   | 42.5% (30.3% to 57%)      |
| 14 | Viet Nam | Non-venomous animal contact                     | 0 (0 to 0) | 0 (0 to 0)   | -27.4% (-32% to -21.7%)   |
| 15 | Viet Nam | Other exposure to mechanical forces             | 0 (0 to 1) | 0 (0 to 0)   | -11.5% (-17.7% to -3%)    |
| 16 | Viet Nam | Other road injuries                             | 0 (0 to 0) | 0 (0 to 0)   | 23% (12% to 37.1%)        |
| 17 | Viet Nam | Other transport injuries                        | 0 (0 to 0) | 0 (0 to 0)   | 2.1% (-2.9% to 7.1%)      |
| 18 | Viet Nam | Other unintentional injuries                    | 0 (0 to 0) | 0 (0 to 0)   | -26.8% (-31.3% to -21.7%) |
| 19 | Viet Nam | Pedestrian road injuries                        | 0 (0 to 0) | 0 (0 to 0)   | -14.7% (-22.2% to -7.1%)  |
| 20 | Viet Nam | Physical violence by firearm                    | 0 (0 to 0) | 0 (0 to 0)   | 131.5% (103.1% to 167.3%) |
| 21 | Viet Nam | Physical violence by other means                | 0 (0 to 0) | 0 (0 to 0)   | 3.1% (-4.7% to 12.7%)     |
| 22 | Viet Nam | Physical violence by sharp object               | 0 (0 to 0) | 0 (0 to 0)   | -24.8% (-34.2% to -15.8%) |
| 23 | Viet Nam | Poisoning by carbon monoxide                    | 0 (0 to 0) | 0 (0 to 0)   | 11.4% (0.7% to 23.7%)     |
| 24 | Viet Nam | Poisoning by other means                        | 0 (0 to 0) | 0 (0 to 0)   | -31.4% (-38.8% to -23%)   |
| 25 | Viet Nam | Pulmonary aspiration and foreign body in airway | 0 (0 to 0) | 0 (0 to 0)   | -21.7% (-28.4% to -13.7%) |
| 26 | Viet Nam | Self-harm by firearm                            | 0 (0 to 0) | 0 (0 to 0)   | 89% (63.8% to 127.1%)     |
| 27 | Viet Nam | Self-harm by other specified means              | 0 (0 to 0) | 0 (0 to 0)   | 5.6% (-0.1% to 12.9%)     |
| 28 | Viet Nam | Unintentional firearm injuries                  | 0 (0 to 0) | 0 (0 to 0)   | -31.3% (-39.5% to -23.8%) |
| 29 | Viet Nam | Venomous animal contact                         | 0 (0 to 0) | 0 (0 to 0)   | -30.8% (-38.5% to -22.7%) |
| 30 | Yemen    | Adverse effects of medical treatment            | 0 (0 to 0) | 0 (0 to 0)   | 0% (0% to 0%)             |
| 31 | Yemen    | Conflict and terrorism                          | 0 (0 to 0) | 22 (5 to 66) | NA                        |
| 32 | Yemen    | Cyclist road injuries                           | 0 (0 to 0) | 0 (0 to 0)   | -0.2% (-7.8% to 8.9%)     |
| 33 | Yemen    | Drowning                                        | 0 (0 to 0) | 0 (0 to 0)   | -21.5% (-29.1% to -11.9%) |
| 34 | Yemen    | Environmental heat and cold exposure            | 0 (0 to 0) | 0 (0 to 0)   | 0.6% (-4.3% to 5.6%)      |
| 35 | Yemen    | Executions and police conflict                  | 0 (0 to 0) | 0 (0 to 0)   | NA                        |
| 36 | Yemen    | Exposure to forces of nature                    | 0 (0 to 0) | 0 (0 to 0)   | NA                        |
| 37 | Yemen    | Falls                                           | 1 (1 to 2) | 2 (1 to 2)   | 18% (13.7% to 22.5%)      |
| 38 | Yemen    | Fire, heat, and hot substances                  | 0 (0 to 0) | 0 (0 to 0)   | -32.9% (-38% to -28.1%)   |
| 39 | Yemen    | Foreign body in eyes                            | 0 (0 to 0) | 0 (0 to 0)   | 0% (0% to 0%)             |
| 40 | Yemen    | Foreign body in other body part                 | 0 (0 to 0) | 0 (0 to 0)   | -1.3% (-5.1% to 2.2%)     |
| 41 | Yemen    | Motor vehicle road injuries                     | 1 (0 to 1) | 1 (0 to 1)   | -16% (-21.6% to -9.7%)    |
| 42 | Yemen    | Motorcyclist road injuries                      | 0 (0 to 0) | 0 (0 to 0)   | -18.9% (-26.8% to -10.1%) |
| 43 | Yemen    | Non-venomous animal contact                     | 0 (0 to 0) | 0 (0 to 0)   | 7.3% (2.6% to 11.8%)      |
| 44 | Yemen    | Other exposure to mechanical forces             | 0 (0 to 1) | 0 (0 to 0)   | -15% (-20.3% to -9.6%)    |
| 45 |          |                                                 |            |              |                           |
| 46 |          |                                                 |            |              |                           |

|    |        |                                                 |            |            |                           |
|----|--------|-------------------------------------------------|------------|------------|---------------------------|
| 1  |        |                                                 |            |            |                           |
| 2  | Yemen  | Other road injuries                             | 0 (0 to 0) | 0 (0 to 0) | 3.3% (-6.2% to 13.7%)     |
| 3  | Yemen  | Other transport injuries                        | 0 (0 to 0) | 0 (0 to 0) | -0.4% (-4.8% to 4.3%)     |
| 4  | Yemen  | Other unintentional injuries                    | 0 (0 to 0) | 0 (0 to 0) | -22.7% (-26.5% to -19%)   |
| 5  | Yemen  | Pedestrian road injuries                        | 0 (0 to 1) | 0 (0 to 0) | -14.6% (-21.6% to -7.2%)  |
| 6  | Yemen  | Physical violence by firearm                    | 0 (0 to 0) | 0 (0 to 0) | 99.7% (74.8% to 131.9%)   |
| 7  | Yemen  | Physical violence by other means                | 0 (0 to 0) | 0 (0 to 0) | 33.5% (22.3% to 47.9%)    |
| 8  | Yemen  | Physical violence by sharp object               | 0 (0 to 0) | 0 (0 to 0) | -8.5% (-18.7% to 2.4%)    |
| 9  | Yemen  | Poisoning by carbon monoxide                    | 0 (0 to 0) | 0 (0 to 0) | 14.6% (-0.2% to 31.1%)    |
| 10 | Yemen  | Poisoning by other means                        | 0 (0 to 0) | 0 (0 to 0) | -30.7% (-37.5% to -23%)   |
| 11 | Yemen  | Pulmonary aspiration and foreign body in airway | 0 (0 to 0) | 0 (0 to 0) | -13.3% (-21.4% to -3.2%)  |
| 12 | Yemen  | Self-harm by firearm                            | 0 (0 to 0) | 0 (0 to 0) | 21.6% (8% to 36.4%)       |
| 13 | Yemen  | Self-harm by other specified means              | 0 (0 to 0) | 0 (0 to 0) | 7.3% (1.5% to 13.5%)      |
| 14 | Yemen  | Unintentional firearm injuries                  | 0 (0 to 0) | 0 (0 to 0) | -17.6% (-24.5% to -10.6%) |
| 15 | Yemen  | Venomous animal contact                         | 0 (0 to 0) | 0 (0 to 0) | 8.6% (1.6% to 16.5%)      |
| 16 | Zambia | Adverse effects of medical treatment            | 0 (0 to 0) | 0 (0 to 0) | 0% (0% to 0%)             |
| 17 | Zambia | Conflict and terrorism                          | 0 (0 to 1) | 0 (0 to 0) | NA                        |
| 18 | Zambia | Cyclist road injuries                           | 1 (1 to 3) | 1 (1 to 3) | 1.7% (-5.1% to 9.1%)      |
| 19 | Zambia | Drowning                                        | 0 (0 to 0) | 0 (0 to 0) | -3.3% (-12% to 6.2%)      |
| 20 | Zambia | Environmental heat and cold exposure            | 0 (0 to 0) | 0 (0 to 0) | -7.9% (-14% to -1.2%)     |
| 21 | Zambia | Executions and police conflict                  | 0 (0 to 0) | 0 (0 to 0) | NA                        |
| 22 | Zambia | Exposure to forces of nature                    | 0 (0 to 0) | 0 (0 to 0) | NA                        |
| 23 | Zambia | Falls                                           | 4 (2 to 5) | 4 (3 to 6) | 25.5% (20.7% to 30.1%)    |
| 24 | Zambia | Fire, heat, and hot substances                  | 0 (0 to 0) | 0 (0 to 0) | -16.2% (-20.7% to -11%)   |
| 25 | Zambia | Foreign body in eyes                            | 0 (0 to 0) | 0 (0 to 0) | 0% (0% to 0%)             |
| 26 | Zambia | Foreign body in other body part                 | 1 (0 to 1) | 1 (0 to 1) | 3.2% (-0.5% to 7.5%)      |
| 27 | Zambia | Motor vehicle road injuries                     | 1 (0 to 1) | 1 (0 to 1) | -0.6% (-8.9% to 8.6%)     |
| 28 | Zambia | Motorcyclist road injuries                      | 0 (0 to 1) | 0 (0 to 1) | -11.2% (-18.6% to -3.3%)  |
| 29 | Zambia | Non-venomous animal contact                     | 0 (0 to 1) | 0 (0 to 1) | -21.2% (-25.3% to -16.7%) |
| 30 | Zambia | Other exposure to mechanical forces             | 0 (0 to 0) | 0 (0 to 0) | -12.8% (-18.2% to -6.8%)  |
| 31 | Zambia | Other road injuries                             | 0 (0 to 0) | 0 (0 to 0) | 15.5% (4.7% to 26.6%)     |
| 32 | Zambia | Other transport injuries                        | 0 (0 to 1) | 0 (0 to 1) | -16.5% (-20.7% to -12.7%) |
| 33 | Zambia | Other unintentional injuries                    | 0 (0 to 0) | 0 (0 to 0) | -18.2% (-24.4% to -11.2%) |
| 34 | Zambia | Pedestrian road injuries                        | 2 (1 to 3) | 1 (1 to 3) | -8% (-14% to -1.1%)       |
| 35 | Zambia | Physical violence by firearm                    | 0 (0 to 0) | 0 (0 to 0) | 88.4% (68.4% to 110%)     |
| 36 | Zambia | Physical violence by other means                | 0 (0 to 0) | 0 (0 to 0) | 52.3% (37% to 67.8%)      |
| 37 | Zambia | Physical violence by sharp object               | 0 (0 to 0) | 0 (0 to 0) | 61.2% (39.4% to 82.7%)    |
| 38 | Zambia | Poisoning by carbon monoxide                    | 0 (0 to 0) | 0 (0 to 0) | 18.9% (5.1% to 32.7%)     |
| 39 | Zambia | Poisoning by other means                        | 0 (0 to 0) | 0 (0 to 0) | -24.4% (-32.2% to -16.5%) |
| 40 | Zambia | Pulmonary aspiration and foreign body in airway | 0 (0 to 0) | 0 (0 to 0) | -12.7% (-23.4% to -0.6%)  |
| 41 | Zambia | Self-harm by firearm                            | 0 (0 to 0) | 0 (0 to 0) | 35.8% (20.9% to 58.1%)    |
| 42 | Zambia | Self-harm by other specified means              | 0 (0 to 0) | 0 (0 to 0) | 7.7% (1.1% to 15%)        |
| 43 | Zambia | Unintentional firearm injuries                  | 0 (0 to 0) | 0 (0 to 0) | -24% (-31.5% to -16.4%)   |
| 44 | Zambia | Venomous animal contact                         | 0 (0 to 0) | 0 (0 to 0) | -26.5% (-34.9% to -17.9%) |
| 45 |        |                                                 |            |            |                           |
| 46 |        |                                                 |            |            |                           |



|    |                                                             |                                                 |            |            |                           |
|----|-------------------------------------------------------------|-------------------------------------------------|------------|------------|---------------------------|
| 1  |                                                             |                                                 |            |            |                           |
| 2  | Zimbabwe                                                    | Adverse effects of medical treatment            | 0 (0 to 0) | 0 (0 to 0) | 0% (0% to 0%)             |
| 3  | Zimbabwe                                                    | Conflict and terrorism                          | 0 (0 to 0) | 0 (0 to 0) | NA                        |
| 4  | Zimbabwe                                                    | Cyclist road injuries                           | 0 (0 to 1) | 1 (0 to 1) | 26% (11.1% to 44.3%)      |
| 5  | Zimbabwe                                                    | Drowning                                        | 0 (0 to 0) | 0 (0 to 0) | -18.8% (-24.9% to -12.7%) |
| 6  | Zimbabwe                                                    | Environmental heat and cold exposure            | 0 (0 to 0) | 0 (0 to 0) | -1.4% (-7.2% to 4.5%)     |
| 7  | Zimbabwe                                                    | Executions and police conflict                  | 0 (0 to 0) | 0 (0 to 0) | NA                        |
| 8  | Zimbabwe                                                    | Exposure to forces of nature                    | 0 (0 to 0) | 1 (1 to 3) | NA                        |
| 9  | Zimbabwe                                                    | Falls                                           | 3 (2 to 4) | 3 (2 to 4) | -0.4% (-3.7% to 3.1%)     |
| 10 | Zimbabwe                                                    | Fire, heat, and hot substances                  | 0 (0 to 0) | 0 (0 to 0) | 6.6% (0.5% to 12.5%)      |
| 11 | Zimbabwe                                                    | Foreign body in eyes                            | 0 (0 to 0) | 0 (0 to 0) | 0% (0% to 0%)             |
| 12 | Zimbabwe                                                    | Foreign body in other body part                 | 1 (1 to 1) | 1 (0 to 1) | -5.1% (-8.6% to -1%)      |
| 13 | Zimbabwe                                                    | Motor vehicle road injuries                     | 1 (0 to 1) | 1 (0 to 1) | 23.2% (9% to 40.8%)       |
| 14 | Zimbabwe                                                    | Motorcyclist road injuries                      | 0 (0 to 1) | 0 (0 to 0) | -19.6% (-29.2% to -8.7%)  |
| 15 | Zimbabwe                                                    | Non-venomous animal contact                     | 0 (0 to 0) | 0 (0 to 1) | 6% (0.9% to 10.9%)        |
| 16 | Zimbabwe                                                    | Other exposure to mechanical forces             | 0 (0 to 0) | 0 (0 to 0) | -8.7% (-13.1% to -3.7%)   |
| 17 | Zimbabwe                                                    | Other road injuries                             | 0 (0 to 0) | 0 (0 to 0) | 41.8% (22.2% to 69.3%)    |
| 18 | Zimbabwe                                                    | Other transport injuries                        | 0 (0 to 1) | 1 (0 to 1) | 24.1% (17.8% to 30.8%)    |
| 19 | Zimbabwe                                                    | Other unintentional injuries                    | 0 (0 to 0) | 0 (0 to 0) | -7.1% (-10.9% to -2.6%)   |
| 20 | Zimbabwe                                                    | Pedestrian road injuries                        | 2 (1 to 3) | 1 (0 to 2) | -34.7% (-42.2% to -28%)   |
| 21 | Zimbabwe                                                    | Physical violence by firearm                    | 0 (0 to 0) | 0 (0 to 0) | -4.8% (-15.7% to 6.1%)    |
| 22 | Zimbabwe                                                    | Physical violence by other means                | 0 (0 to 0) | 0 (0 to 0) | 2.8% (-5.7% to 13.7%)     |
| 23 | Zimbabwe                                                    | Physical violence by sharp object               | 0 (0 to 0) | 0 (0 to 0) | 9.2% (-2.1% to 22%)       |
| 24 | Zimbabwe                                                    | Poisoning by carbon monoxide                    | 0 (0 to 0) | 0 (0 to 0) | -10.6% (-19.5% to 0.5%)   |
| 25 | Zimbabwe                                                    | Poisoning by other means                        | 0 (0 to 0) | 0 (0 to 0) | -7.5% (-13.2% to -1.4%)   |
| 26 | Zimbabwe                                                    | Pulmonary aspiration and foreign body in airway | 0 (0 to 0) | 0 (0 to 0) | 10.7% (3% to 18.3%)       |
| 27 | Zimbabwe                                                    | Self-harm by firearm                            | 0 (0 to 0) | 0 (0 to 0) | 7.9% (-7.9% to 21.6%)     |
| 28 | Zimbabwe                                                    | Self-harm by other specified means              | 0 (0 to 0) | 0 (0 to 0) | 30.6% (24.3% to 37.1%)    |
| 29 | Zimbabwe                                                    | Unintentional firearm injuries                  | 0 (0 to 0) | 0 (0 to 0) | -5.8% (-12.8% to 1.9%)    |
| 30 | Zimbabwe                                                    | Venomous animal contact                         | 0 (0 to 0) | 0 (0 to 0) | 16.5% (8.6% to 25.3%)     |
| 31 | Abbreviations: UI, uncertainty interval; NA, not applicable |                                                 |            |            |                           |
| 32 |                                                             |                                                 |            |            |                           |
| 33 |                                                             |                                                 |            |            |                           |
| 34 |                                                             |                                                 |            |            |                           |
| 35 |                                                             |                                                 |            |            |                           |
| 36 |                                                             |                                                 |            |            |                           |
| 37 |                                                             |                                                 |            |            |                           |
| 38 |                                                             |                                                 |            |            |                           |
| 39 |                                                             |                                                 |            |            |                           |
| 40 |                                                             |                                                 |            |            |                           |
| 41 |                                                             |                                                 |            |            |                           |
| 42 |                                                             |                                                 |            |            |                           |
| 43 |                                                             |                                                 |            |            |                           |
| 44 |                                                             |                                                 |            |            |                           |
| 45 |                                                             |                                                 |            |            |                           |
| 46 |                                                             |                                                 |            |            |                           |



## Checklist of information that should be included in new reports of global health estimates

| Item #                                                                                                | Checklist item                                                                                                                                                                                                                                                                                                                                                                            | Reported on page #                                                                                                                                                                                                                 |
|-------------------------------------------------------------------------------------------------------|-------------------------------------------------------------------------------------------------------------------------------------------------------------------------------------------------------------------------------------------------------------------------------------------------------------------------------------------------------------------------------------------|------------------------------------------------------------------------------------------------------------------------------------------------------------------------------------------------------------------------------------|
| <b>Objectives and funding</b>                                                                         |                                                                                                                                                                                                                                                                                                                                                                                           |                                                                                                                                                                                                                                    |
| 1                                                                                                     | Define the indicator(s), populations (including age, sex, and geographic entities), and time period(s) for which estimates were made.                                                                                                                                                                                                                                                     | Main Pg. 5-10                                                                                                                                                                                                                      |
| 2                                                                                                     | List the funding sources for the work.                                                                                                                                                                                                                                                                                                                                                    | Main Pg. 22                                                                                                                                                                                                                        |
| <b>Data Inputs</b>                                                                                    |                                                                                                                                                                                                                                                                                                                                                                                           |                                                                                                                                                                                                                                    |
| <i>For all data inputs from multiple sources that are synthesized as part of the study:</i>           |                                                                                                                                                                                                                                                                                                                                                                                           |                                                                                                                                                                                                                                    |
| 3                                                                                                     | Describe how the data were identified and how the data were accessed.                                                                                                                                                                                                                                                                                                                     | Main Pg. 5-10                                                                                                                                                                                                                      |
| 4                                                                                                     | Specify the inclusion and exclusion criteria. Identify all ad-hoc exclusions.                                                                                                                                                                                                                                                                                                             | Main Pg. 6-7<br><a href="https://ghdx.healthdata.org/gbd-2019/data-input-sources">https://ghdx.healthdata.org/gbd-2019/data-input-sources</a>                                                                                      |
| 5                                                                                                     | Provide information on all included data sources and their main characteristics. For each data source used, report reference information or contact name/institution, population represented, data collection method, year(s) of data collection, sex and age range, diagnostic criteria or measurement method, and sample size, as relevant.                                             | Main Pg. 6-7<br><a href="https://ghdx.healthdata.org/gbd-2019/data-input-sources">https://ghdx.healthdata.org/gbd-2019/data-input-sources</a>                                                                                      |
| 6                                                                                                     | Identify and describe any categories of input data that have potentially important biases (e.g., based on characteristics listed in item 5).                                                                                                                                                                                                                                              | <a href="https://ghdx.healthdata.org/gbd-2019/data-input-sources">https://ghdx.healthdata.org/gbd-2019/data-input-sources</a><br><a href="https://ghdx.healthdata.org/gbd-2019/code">https://ghdx.healthdata.org/gbd-2019/code</a> |
| <i>For data inputs that contribute to the analysis but were not synthesized as part of the study:</i> |                                                                                                                                                                                                                                                                                                                                                                                           |                                                                                                                                                                                                                                    |
| 7                                                                                                     | Describe and give sources for any other data inputs.                                                                                                                                                                                                                                                                                                                                      | N/A                                                                                                                                                                                                                                |
| <i>For all data inputs:</i>                                                                           |                                                                                                                                                                                                                                                                                                                                                                                           |                                                                                                                                                                                                                                    |
| 8                                                                                                     | Provide all data inputs in a file format from which data can be efficiently extracted (e.g., a spreadsheet rather than a PDF), including all relevant meta-data listed in item 5. For any data inputs that cannot be shared because of ethical or legal reasons, such as third-party ownership, provide a contact name or the name of the institution that retains the right to the data. | <a href="https://ghdx.healthdata.org/gbd-2019/data-input-sources">https://ghdx.healthdata.org/gbd-2019/data-input-sources</a>                                                                                                      |
| <b>Data analysis</b>                                                                                  |                                                                                                                                                                                                                                                                                                                                                                                           |                                                                                                                                                                                                                                    |
| 9                                                                                                     | Provide a conceptual overview of the data analysis method. A diagram may be helpful.                                                                                                                                                                                                                                                                                                      | Main Pg. 9-10                                                                                                                                                                                                                      |

|                               |                                                                                                                                                                                                                                                                         |                                                                                                                    |
|-------------------------------|-------------------------------------------------------------------------------------------------------------------------------------------------------------------------------------------------------------------------------------------------------------------------|--------------------------------------------------------------------------------------------------------------------|
| 10                            | Provide a detailed description of all steps of the analysis, including mathematical formulae. This description should cover, as relevant, data cleaning, data pre-processing, data adjustments and weighting of data sources, and mathematical or statistical model(s). | Main Pg. 9-10<br><a href="https://ghdx.healthdata.org/gbd-2019/code">https://ghdx.healthdata.org/gbd-2019/code</a> |
| 11                            | Describe how candidate models were evaluated and how the final model(s) were selected.                                                                                                                                                                                  | N/A                                                                                                                |
| 12                            | Provide the results of an evaluation of model performance, if done, as well as the results of any relevant sensitivity analysis.                                                                                                                                        | N/A                                                                                                                |
| 13                            | Describe methods for calculating uncertainty of the estimates. State which sources of uncertainty were, and were not, accounted for in the uncertainty analysis.                                                                                                        | Main Pg. 8-9                                                                                                       |
| 14                            | State how analytic or statistical source code used to generate estimates can be accessed.                                                                                                                                                                               | <a href="https://ghdx.healthdata.org/gbd-2019/code">https://ghdx.healthdata.org/gbd-2019/code</a>                  |
| <b>Results and Discussion</b> |                                                                                                                                                                                                                                                                         |                                                                                                                    |
| 15                            | Provide published estimates in a file format from which data can be efficiently extracted.                                                                                                                                                                              | <a href="https://vizhub.healthdata.org/gbd-results/">https://vizhub.healthdata.org/gbd-results/</a>                |
| 16                            | Report a quantitative measure of the uncertainty of the estimates (e.g. uncertainty intervals).                                                                                                                                                                         | Main Pg. 10-13                                                                                                     |
| 17                            | Interpret results in light of existing evidence. If updating a previous set of estimates, describe the reasons for changes in estimates.                                                                                                                                | Main Pg. 13-17                                                                                                     |
| 18                            | Discuss limitations of the estimates. Include a discussion of any modelling assumptions or data limitations that affect interpretation of the estimates.                                                                                                                | Main Pg. 17-20                                                                                                     |

*This checklist should be used in conjunction with the GATHER statement and Explanation and Elaboration document, found on [gather-statement.org](http://gather-statement.org)*

**STROBE Statement—Checklist of items that should be included in reports of *cross-sectional studies***

|                              | <b>Item No</b> | <b>Recommendation</b>                                                                                                                                                                | <b>Page No</b>                                                                                                                                |
|------------------------------|----------------|--------------------------------------------------------------------------------------------------------------------------------------------------------------------------------------|-----------------------------------------------------------------------------------------------------------------------------------------------|
| <b>Title and abstract</b>    | 1              | (a) Indicate the study's design with a commonly used term in the title or the abstract                                                                                               | Main Pg. 2                                                                                                                                    |
|                              |                | (b) Provide in the abstract an informative and balanced summary of what was done and what was found                                                                                  | Main Pg. 2                                                                                                                                    |
| <b>Introduction</b>          |                |                                                                                                                                                                                      |                                                                                                                                               |
| Background/rationale         | 2              | Explain the scientific background and rationale for the investigation being reported                                                                                                 | Main Pg. 4-5                                                                                                                                  |
| Objectives                   | 3              | State specific objectives, including any prespecified hypotheses                                                                                                                     | Main Pg. 5                                                                                                                                    |
| <b>Methods</b>               |                |                                                                                                                                                                                      |                                                                                                                                               |
| Study design                 | 4              | Present key elements of study design early in the paper                                                                                                                              | Main Pg. 5-6                                                                                                                                  |
| Setting                      | 5              | Describe the setting, locations, and relevant dates, including periods of recruitment, exposure, follow-up, and data collection                                                      | Main Pg. 6-7<br><a href="https://ghdx.healthdata.org/gbd-2019/data-input-sources">https://ghdx.healthdata.org/gbd-2019/data-input-sources</a> |
| Participants                 | 6              | (a) Give the eligibility criteria, and the sources and methods of selection of participants                                                                                          | Main Pg. 6-7<br><a href="https://ghdx.healthdata.org/gbd-2019/data-input-sources">https://ghdx.healthdata.org/gbd-2019/data-input-sources</a> |
| Variables                    | 7              | Clearly define all outcomes, exposures, predictors, potential confounders, and effect modifiers. Give diagnostic criteria, if applicable                                             | Main Pg. 7-9<br><a href="https://vizhub.healthdata.org/gbd-results/">https://vizhub.healthdata.org/gbd-results/</a>                           |
| Data sources/<br>measurement | 8*             | For each variable of interest, give sources of data and details of methods of assessment (measurement). Describe comparability of assessment methods if there is more than one group | Main Pg. 6-7<br><a href="https://vizhub.healthdata.org/gbd-results/">https://vizhub.healthdata.org/gbd-results/</a>                           |
| Bias                         | 9              | Describe any efforts to address potential sources of bias                                                                                                                            | <a href="https://ghdx.healthdata.org/gbd-2019/data-input-sources">https://ghdx.healthdata.org/gbd-2019/data-input-sources</a>                 |

|                        |     |                                                                                                                                                                                                   |                                                                                                                                                                                                                                    |
|------------------------|-----|---------------------------------------------------------------------------------------------------------------------------------------------------------------------------------------------------|------------------------------------------------------------------------------------------------------------------------------------------------------------------------------------------------------------------------------------|
|                        |     |                                                                                                                                                                                                   | <a href="https://ghdx.healthdata.org/gbd-2019/code">https://ghdx.healthdata.org/gbd-2019/code</a>                                                                                                                                  |
| Study size             | 10  | Explain how the study size was arrived at                                                                                                                                                         | N/A                                                                                                                                                                                                                                |
| Quantitative variables | 11  | Explain how quantitative variables were handled in the analyses. If applicable, describe which groupings were chosen and why                                                                      | Main Pg. 7-9<br><a href="https://ghdx.healthdata.org/gbd-2019/code">https://ghdx.healthdata.org/gbd-2019/code</a>                                                                                                                  |
| Statistical methods    | 12  | (a) Describe all statistical methods, including those used to control for confounding                                                                                                             | Main Pg. 9-10<br><a href="https://ghdx.healthdata.org/gbd-2019/code">https://ghdx.healthdata.org/gbd-2019/code</a>                                                                                                                 |
|                        |     | (b) Describe any methods used to examine subgroups and interactions                                                                                                                               | N/A                                                                                                                                                                                                                                |
|                        |     | (c) Explain how missing data were addressed                                                                                                                                                       | N/A                                                                                                                                                                                                                                |
|                        |     | (d) If applicable, describe analytical methods taking account of sampling strategy                                                                                                                | N/A                                                                                                                                                                                                                                |
|                        |     | (e) Describe any sensitivity analyses                                                                                                                                                             | N/A                                                                                                                                                                                                                                |
| <b>Results</b>         |     |                                                                                                                                                                                                   |                                                                                                                                                                                                                                    |
| Participants           | 13* | (a) Report numbers of individuals at each stage of study—eg numbers potentially eligible, examined for eligibility, confirmed eligible, included in the study, completing follow-up, and analysed | <a href="https://ghdx.healthdata.org/gbd-2019/data-input-sources">https://ghdx.healthdata.org/gbd-2019/data-input-sources</a><br><a href="https://ghdx.healthdata.org/gbd-2019/code">https://ghdx.healthdata.org/gbd-2019/code</a> |
|                        |     | (b) Give reasons for non-participation at each stage                                                                                                                                              | <a href="https://ghdx.healthdata.org/gbd-2019/data-input-sources">https://ghdx.healthdata.org/gbd-2019/data-input-sources</a><br><a href="https://ghdx.healthdata.org/gbd-2019/code">https://ghdx.healthdata.org/gbd-2019/code</a> |
|                        |     | (c) Consider use of a flow diagram                                                                                                                                                                | <a href="https://ghdx.healthdata.org/gbd-2019/data-input-sources">https://ghdx.healthdata.org/gbd-2019/data-input-sources</a><br><a href="https://ghdx.healthdata.org/gbd-2019/code">https://ghdx.healthdata.org/gbd-2019/code</a> |
| Descriptive data       | 14* | (a) Give characteristics of study participants (eg demographic, clinical, social) and information on exposures and potential confounders                                                          | Main Pg. 10-13                                                                                                                                                                                                                     |

|                          |     |                                                                                                                                                                                                              |                |
|--------------------------|-----|--------------------------------------------------------------------------------------------------------------------------------------------------------------------------------------------------------------|----------------|
|                          |     | (b) Indicate number of participants with missing data for each variable of interest                                                                                                                          | N/A            |
| Outcome data             | 15* | Report numbers of outcome events or summary measures                                                                                                                                                         | Main Pg. 10-13 |
| Main results             | 16  | (a) Give unadjusted estimates and, if applicable, confounder-adjusted estimates and their precision (eg, 95% confidence interval). Make clear which confounders were adjusted for and why they were included | Main Pg. 10-13 |
|                          |     | (b) Report category boundaries when continuous variables were categorized                                                                                                                                    | N/A            |
|                          |     | (c) If relevant, consider translating estimates of relative risk into absolute risk for a meaningful time period                                                                                             | N/A            |
| Other analyses           | 17  | Report other analyses done—eg analyses of subgroups and interactions, and sensitivity analyses                                                                                                               | N/A            |
| <b>Discussion</b>        |     |                                                                                                                                                                                                              |                |
| Key results              | 18  | Summarise key results with reference to study objectives                                                                                                                                                     | Main Pg. 13-17 |
| Limitations              | 19  | Discuss limitations of the study, taking into account sources of potential bias or imprecision. Discuss both direction and magnitude of any potential bias                                                   | Main Pg. 17-20 |
| Interpretation           | 20  | Give a cautious overall interpretation of results considering objectives, limitations, multiplicity of analyses, results from similar studies, and other relevant evidence                                   | Main Pg. 20-22 |
| Generalisability         | 21  | Discuss the generalisability (external validity) of the study results                                                                                                                                        | Main Pg. 20-22 |
| <b>Other information</b> |     |                                                                                                                                                                                                              |                |
| Funding                  | 22  | Give the source of funding and                                                                                                                                                                               | Main Pg. 22    |

|                                                                                                                                |  |
|--------------------------------------------------------------------------------------------------------------------------------|--|
| the role of the funders for the present study and, if applicable, for the original study on which the present article is based |  |
|--------------------------------------------------------------------------------------------------------------------------------|--|

\*Give information separately for exposed and unexposed groups.

**Note:** An Explanation and Elaboration article discusses each checklist item and gives methodological background and published examples of transparent reporting. The STROBE checklist is best used in conjunction with this article (freely available on the Web sites of PLoS Medicine at <http://www.plosmedicine.org/>, Annals of Internal Medicine at <http://www.annals.org/>, and Epidemiology at <http://www.epidem.com/>). Information on the STROBE Initiative is available at [www.strobe-statement.org](http://www.strobe-statement.org).

# BMJ Open

## Global, regional, and national burden of traumatic brain injury and spinal cord injury, 1990–2019: a systematic analysis for the Global Burden of Disease Study 2019

|                                 |                                                                                                                                                                                                                                                                                                                                                                                                                                                     |
|---------------------------------|-----------------------------------------------------------------------------------------------------------------------------------------------------------------------------------------------------------------------------------------------------------------------------------------------------------------------------------------------------------------------------------------------------------------------------------------------------|
| Journal:                        | <i>BMJ Open</i>                                                                                                                                                                                                                                                                                                                                                                                                                                     |
| Manuscript ID                   | bmjopen-2023-075049.R2                                                                                                                                                                                                                                                                                                                                                                                                                              |
| Article Type:                   | Original research                                                                                                                                                                                                                                                                                                                                                                                                                                   |
| Date Submitted by the Author:   | 19-Sep-2023                                                                                                                                                                                                                                                                                                                                                                                                                                         |
| Complete List of Authors:       | Guan, Bin; Shandong University Cheeloo College of Medicine<br>Anderson, David; The University of Sydney Faculty of Medicine and Health<br>Chen, Lingxiao; Shandong University Cheeloo College of Medicine; The University of Sydney Faculty of Medicine and Health<br>Feng, Shiqing; Shandong University Cheeloo College of Medicine; The Second Hospital of Shandong University<br>Zhou, Hengxing; Shandong University Cheeloo College of Medicine |
| <b>Primary Subject Heading</b>: | Neurology                                                                                                                                                                                                                                                                                                                                                                                                                                           |
| Secondary Subject Heading:      | Epidemiology, Global health, Neurology, Public health                                                                                                                                                                                                                                                                                                                                                                                               |
| Keywords:                       | EPIDEMIOLOGY, NEUROLOGY, ORTHOPAEDIC & TRAUMA SURGERY, PUBLIC HEALTH                                                                                                                                                                                                                                                                                                                                                                                |
|                                 |                                                                                                                                                                                                                                                                                                                                                                                                                                                     |

SCHOLARONE™  
Manuscripts





I, the Submitting Author has the right to grant and does grant on behalf of all authors of the Work (as defined in the below author licence), an exclusive licence and/or a non-exclusive licence for contributions from authors who are: i) UK Crown employees; ii) where BMJ has agreed a CC-BY licence shall apply, and/or iii) in accordance with the terms applicable for US Federal Government officers or employees acting as part of their official duties; on a worldwide, perpetual, irrevocable, royalty-free basis to BMJ Publishing Group Ltd ("BMJ") its licensees and where the relevant Journal is co-owned by BMJ to the co-owners of the Journal, to publish the Work in this journal and any other BMJ products and to exploit all rights, as set out in our [licence](#).

The Submitting Author accepts and understands that any supply made under these terms is made by BMJ to the Submitting Author unless you are acting as an employee on behalf of your employer or a postgraduate student of an affiliated institution which is paying any applicable article publishing charge ("APC") for Open Access articles. Where the Submitting Author wishes to make the Work available on an Open Access basis (and intends to pay the relevant APC), the terms of reuse of such Open Access shall be governed by a Creative Commons licence – details of these licences and which [Creative Commons](#) licence will apply to this Work are set out in our licence referred to above.

Other than as permitted in any relevant BMJ Author's Self Archiving Policies, I confirm this Work has not been accepted for publication elsewhere, is not being considered for publication elsewhere and does not duplicate material already published. I confirm all authors consent to publication of this Work and authorise the granting of this licence.

1  
2  
3 **1 Global, regional, and national burden of traumatic brain injury and spinal cord injury,**  
4  
5 **2 1990–2019: a systematic analysis for the Global Burden of Disease Study 2019**  
6  
7  
8  
9

10 4 Bin Guan MBBS<sup>1\*</sup>, David B. Anderson PhD<sup>2\*</sup>, Lingxiao Chen PhD<sup>1,3c†</sup>, Shiqing Feng  
11  
12 MD<sup>1,4b†</sup>, Hengxing Zhou MD<sup>1a†</sup>  
13  
14  
15  
16  
17

18 <sup>1</sup>Department of Orthopaedics, Qilu Hospital of Shandong University, Shandong University  
19  
20 Centre for Orthopaedics, Advanced Medical Research Institute, Cheeloo College of Medicine,  
21  
22 Shandong University, Jinan, Shandong, 250012, P.R. China.  
23  
24  
25

26 <sup>2</sup>School of Health Sciences, Faculty of Medicine and Health, University of Sydney, New  
27  
28 South Wales, Australia.  
29  
30

31 <sup>3</sup>Sydney Musculoskeletal Health, The Kolling Institute, Faculty of Medicine and Health,  
32  
33 University of Sydney, Sydney, NSW, Australia  
34  
35

36 <sup>4</sup>The Second Hospital of Shandong University, Cheeloo College of Medicine, Shandong  
37  
38 University, Jinan, Shandong, 250012, P.R. China.  
39  
40  
41

42  
43  
44 17 \*Bin Guan and David B. Anderson contributed equally to this work.  
45  
46

47 18 †Hengxing Zhou, Shiqing Feng, and Lingxiao Chen were designated as co-corresponding  
48  
49 authors.  
50  
51

52  
53  
54 21 <sup>a</sup>Email address for Hengxing Zhou: zhouhengxing@sdu.edu.cn  
55  
56

57 22 <sup>b</sup>Email address for Shiqing Feng: shiqingfeng@sdu.edu.cn  
58  
59  
60

1  
2  
3  
4  
5  
6  
7  
8  
9  
10  
11  
12  
13  
14  
15  
16  
17  
18  
19  
20  
21  
22  
23  
24  
25  
26  
27  
28  
29  
30  
31  
32  
33  
34  
35  
36  
37  
38  
39  
40  
41  
42  
43  
44  
45  
46  
47  
48  
49  
50  
51  
52  
53  
54  
55  
56  
57  
58  
59  
60

23   <sup>e</sup>Email address for Lingxiao Chen: [lche4036@uni.sydney.edu.au](mailto:lche4036@uni.sydney.edu.au)

For peer review only

1  
2  
3 24 **Title**  
4  
5  
6 25  
7

8 26 Global, regional, and national burden of traumatic brain injury and spinal cord injury, 1990–  
9  
10 27 2019: a systematic analysis for the Global Burden of Disease Study 2019  
11  
12  
13 28  
14

15  
16 29 **Abstract**  
17  
18 30  
19  
20

21 31 **Objectives:** To evaluate the most up-to-date burden of traumatic brain injury (TBI) and spinal  
22  
23 32 cord injury (SCI) and analyze their leading causes in different countries/territories.  
24  
25  
26 33

27  
28  
29 34 **Design:** An analysis of Global Burden of Disease (GBD) data.  
30  
31 35

32  
33  
34 36 **Setting:** The epidemiologic data were gathered from GBD Results Tool (January 1,  
35  
36 37 1990–December 31, 2019) covering 21 GBD regions and 204 countries/ territories.  
38  
39 38

40  
41  
42 39 **Participants:** Patients with TBI/SCI.  
43  
44 40

45  
46  
47 41 **Main outcomes and measures:** Absolute numbers and age-standardized rates/estimates of  
48  
49 42 incidence, prevalence, and years lived with disability (YLDs) of TBI/SCI by location in 2019,  
50  
51 43 with their percentage changes from 1990 to 2019. The leading causes (e.g., falls) of TBI/SCI  
52  
53 44 in 204 countries/territories.  
54  
55  
56  
57 45  
58  
59  
60

1  
2  
3 46 **Results:** Globally, in 2019, TBI had 27.16 million new cases, 48.99 million prevalent cases,  
4  
5 47 and 7.08 million YLDs. SCI had 0.91 million new cases, 20.64 million prevalent cases, and  
6  
7 48 6.20 million YLDs. Global age-standardized incidence rates of TBI decreased significantly by  
8  
9 49 -5.5% (95% uncertainty interval, -8.9% to -3.0%) from 1990 to 2019, whereas SCI had no  
10  
11 50 significant change (-6.1% [-17.3% to 1.5%]). Regionally, in 2019, Eastern Europe and High-  
12  
13 51 income North America had the highest burden of TBI and SCI, respectively. Nationally, in  
14  
15 52 2019, Slovenia and Afghanistan had the highest age-standardized incidence rates of TBI and  
16  
17 53 SCI, respectively. For TBI, falls was the leading cause in 74% (150/204) of  
18  
19 54 countries/territories, followed by pedestrian road injuries (14%, 29/204), motor vehicle road  
20  
21 55 injuries (5%, 11/204), and conflict and terrorism (2%, 4/204). For SCI, falls was the leading  
22  
23 56 cause in 97% (198/204) of countries/territories, followed by conflict and terrorism (3%,  
24  
25 57 6/204).

26  
27 58  
28  
29 59 **Conclusions:** Global age-standardized incidence rates of TBI have decreased significantly  
30  
31 60 since 1990, whereas SCI had no significant change. The leading causes of TBI/SCI globally  
32  
33 61 were falls, but variations did exist between countries/territories. Policymakers should continue  
34  
35 62 to prioritize interventions to reduce falls, but priorities may vary between countries/territories.  
36  
37 63

#### 38 39 64 **Strengths and Limitations of This Study**

- 40  
41 65
- 42 66 ● One of the strengths of this study was that it provided the most up-to-date global,  
43  
44 67 regional, and national burden of TBI/SCI from 1990 to 2019.
- 45  
46  
47  
48  
49  
50  
51  
52  
53  
54  
55  
56  
57  
58  
59  
60

68

69 ● Another strength of this study was that it presented the variations of leading causes of  
70 TBI/SCI in 204 countries/territories, which have not been assessed before.

71

72 ● One of the limitations was that this study might underestimate the true incidence and  
73 period prevalence of TBI/SCI; was unable to calculate lifetime prevalence of TBI/SCI  
74 through the GBD data.

75

76 ● The second limitation was that the estimates of TBI/SCI for some data-sparse  
77 countries/territories in this study should be interpreted carefully.

78

79 ● The third limitation was that this study could not assess associations between risk factors  
80 and TBI/SCI burden through the GBD data.

81

82

## 83 **Introduction**

84

85 Traumatic brain injury (TBI) and spinal cord injury (SCI) continue to pose challenges to the  
86 global public health systems, and the resulting disabilities have brought huge economic  
87 burden to patients, public health systems, and societies [1, 2]. Compared with the previous  
88 Global Burden of Disease (GBD) 2016 Study [3, 4], new available data sources and improved

5

1  
2  
3 89 statistical methods in the GBD 2019 Study led to the GBD 2019 results superseding those  
4  
5 90 from previous rounds of GBD [5]. Besides, nine additional countries/territories were firstly  
6  
7  
8 91 incorporated in the calculation of disease burden in the GBD 2019 Study [5]. An update on  
9  
10 92 the 2016 results of the burden of TBI/SCI is therefore warranted.

11  
12  
13 93  
14  
15 94 Ding *et al.* reported the burden of SCI at the global and regional levels through the GBD 2019  
16  
17 95 data, but did not mention the disease burden in individual countries/territories [6]. However, it  
18  
19 96 will not allow for identifying variations that can exist between countries/territories within a  
20  
21 97 same world or a same geographical region. Take the previous GBD 2016 Study as an  
22  
23 98 example, the leading cause of TBI in the region, North Africa and Middle East, was  
24  
25 99 concluded to be falls [4]. It was true in Saudi Arabia, whereas it did not reflect the reality in  
26  
27 100 other countries/territories within North Africa and Middle East, such as, Afghanistan, where  
28  
29 101 conflict and terrorism was the leading cause of TBI [4]. Failure to present the data in  
30  
31 102 individual countries/territories can prevent policymakers from identifying which causes  
32  
33 103 should be targeted; wasting resources and reducing effectiveness of any interventions [7].  
34  
35  
36  
37  
38  
39  
40  
41  
42  
43

44 105 Therefore, in this study, we aimed to provide the most up-to-date burden of TBI/SCI through  
45  
46 106 the GBD 2019 data. Also, we analyzed the leading causes of TBI/SCI in 204  
47  
48 107 countries/territories. Finally, the associations between the burden of TBI/SCI and Socio-  
49  
50 108 demographic Index (SDI) in 204 countries/territories was explored.  
51  
52  
53  
54

55 109

## 57 110 **Methods**

58  
59  
60

1  
2  
3 111  
4  
5 112  
6  
7  
8 113  
9  
10 114  
11  
12 115  
13  
14 116  
15  
16 117  
17  
18 118  
19  
20 119  
21  
22 120  
23  
24 121  
25  
26 122  
27  
28 123  
29  
30 124  
31  
32 125  
33  
34 126  
35  
36 127  
37  
38 128  
39  
40 129  
41  
42 130  
43  
44 131  
45  
46 132  
47  
48  
49  
50  
51  
52  
53  
54  
55  
56  
57  
58  
59  
60

## Overview

This study of global health estimates followed the Guidelines for Accurate and Transparent Health Estimates Reporting (GATHER) Statement and the Strengthening the Reporting of Observational Studies in Epidemiology (STROBE) Statement [8, 9]. The GBD 2019 Study estimated burden of 369 diseases and injuries and 87 risk factors through multiple epidemiological measures, including incidence, prevalence, mortality, years of life lost (YLLs), years lived with disability (YLDs), and disability-adjusted life years (DALYs) by age, sex, cause, year, and location from 1990 to 2019 [5]. Our methods used for estimation of the burden of TBI and SCI were based on the framework of the GBD 2019 Study, which had already been described comprehensively elsewhere [5, 10]. Although TBI/SCI could cause death, they were not defined as a cause-of-death in the GBD 2019 Study [5]. Therefore, in this study, we provided the burden of TBI/SCI by incidence, prevalence, and YLDs, but not mortality or YLLs.

## Case Definitions

Based on the framework of the GBD 2019 Study [5], the definitions of TBI/SCI in this study relied on the International Classification of Diseases, Ninth Revision (ICD-9) and the International Classification of Diseases, Tenth Revision (ICD-10), which had also been described in details in the previous GBD 2016 Study published in The Lancet Neurology [4].



1  
2  
3 133 Additionally, a clarification from the GBD 2019 Study is that TBI/SCI are both defined as a  
4  
5 134 nature-of-injury but not a cause-of-injury [5]. For example, TBI/SCI could be caused by a  
6  
7  
8 135 fall, the fall was therefore defined as a cause-of-injury and TBI/SCI as a nature-of-injury.  
9

10 136

### 13 137 **Data Source**

14 138

15  
16  
17  
18 139 The data for 21 GBD regions and 204 countries/territories between January 1, 1990, and  
19  
20  
21 140 December 31, 2019, were available from the GBD Results Tool  
22  
23 141 (<https://vizhub.healthdata.org/gbd-results/>). The data utilized in this study were from patients  
24  
25  
26 142 requiring medical care in hospital and emergency department records [5]. Furthermore,  
27  
28  
29 143 compared with the GBD 2016 Study, new available data sources were incorporated into  
30  
31  
32 144 estimates of non-fatal injuries in the GBD 2019 iteration, such as injury claims data from the  
33  
34 145 Accident Compensation Corporation in New Zealand, national survey data from China,  
35  
36 146 Ghana, India, Mexico, Russian Federation, and South Africa from the World Health  
37  
38  
39 147 Organization's Study on Global AGEing and Adult Health, and literature studies data from  
40  
41  
42 148 India and South Africa based on inputs from the GBD collaborator network [5]. Each data  
43  
44  
45 149 source was assigned a unique identifier and included in the Global Health Data Exchange  
46  
47 150 (<https://ghdx.healthdata.org/gbd-2019/data-input-sources>). Additionally, considering that  
48  
49  
50 151 there are variations in quality of data by each country and territory, estimates in some data-  
51  
52  
53 152 sparse countries/territories were modelled and predicted by borrowing estimates from data-  
54  
55 153 rich countries/territories [5]. Detailed data sources used to estimate the burden of non-fatal  
56  
57  
58 154 injuries from each country and territory were listed in **eTable 1**. More details of the data  
59  
60

155 sources and model strategies have been published elsewhere [5, 10].

156

### 157 **Calculation of Incidence, Prevalence, and Years Lived with Disability**

158

159 The features of data processing used to calculate incidence, prevalence, and YLDs in this  
160 study were consistent with the framework of the GBD 2019 Study [5]. First, the data inputs of  
161 different cause-of-injury were incorporated and modelled by a Bayesian meta-regression tool,  
162 DisMod-MR 2.1, to infer the incidence of each cause-of-injury. Second, the GBD severity  
163 hierarchy for nature-of-injury (**eTable 2**) was utilized to establish a point-to-point relationship  
164 between cause-of-injury and nature-of-injury, which means that when multiple nature-of-  
165 injuries were caused by one cause-of-injury, nature-of-injury with the highest rank in the  
166 GBD severity hierarchy was selected to match it. Based on the framework of the GBD 2019  
167 Study [5], because SCI had a higher rank in the GBD severity hierarchy than TBI, SCI was  
168 chosen if both conditions happened to an individual in our study, which was also consistent  
169 with the calculation process of the previous GBD 2016 Study published in The Lancet  
170 Neurology [4]. Third, for the short-term disability (the duration was less than one year), the  
171 prevalence was approximately calculated as the incidence multiplied by the average duration.  
172 For the long-term disability (the duration was more than one year), DisMod-MR 2.1 was  
173 utilized to convert incidence to prevalence. Fourth, the GBD disability weights (**eTable 3**)  
174 were utilized to calculate YLDs. The GBD disability weights were evaluated on a 0–1 scale,  
175 with 0 representing complete health and 1 representing death [11]. For the short-term  
176 disability, YLDs were calculated as the prevalence multiplied by the GBD disability weights.

1  
2  
3 177 For the long-term disability, YLDs were calculated with the similar process but adjusted by  
4  
5 178 comorbidity correction. Finally, the incidence, prevalence, and YLDs were aggregated to  
6  
7  
8 179 calculate the all-cause incidence, prevalence, and YLDs of TBI/SCI. Due to some sampling  
9  
10  
11 180 errors and non-sampling variances, we calculated the 95% uncertainty interval (UI) using the  
12  
13 181 same methods described previously in the GBD 2019 Study [5]. Generally, UI were from  
14  
15  
16 182 1,000 draw-level estimates for each parameter, and 95% UI were defined by the 25<sup>th</sup> and 975<sup>th</sup>  
17  
18 183 values of the ordered 1,000 estimates.  
19  
20

21 184

### 23 185 **Statistical Analysis**

26 186

28  
29 187 Firstly, according to the GBD location hierarchy (**eTable 4**) in the GBD 2019 Study [5], we  
30  
31 188 calculated absolute numbers and age-standardized rates/estimates of incidence, prevalence,  
32  
33  
34 189 and YLD of TBI/SCI in 21 GBD regions and 204 countries/territories in 2019. The age-  
35  
36  
37 190 standardized rate/estimate is calculated by  $\frac{\sum_{i=1}^A a_i w_i}{\sum_{i=1}^A w_i}$ , where  $a_i$  is the age-specific rate/estimate  
38  
39  
40 191 of the age group  $i$ , and  $w_i$  is the weight of the age group  $i$  derived from the GBD 2019 world  
41  
42  
43 192 population standard (**eTable 5**) [12]. Secondly, based on the framework of the GBD 2019  
44  
45  
46 193 Study [5], we used percentage changes of age-standardized rates/estimates of incidence,  
47  
48 194 prevalence, and YLD to calculate trends in the burden of TBI/SCI from 1990 to 2019. If the  
49  
50  
51 195 95% UI of a percentage change did not include zero, it was determined to be a significant  
52  
53  
54 196 change, and vice versa [13]. Thirdly, according to the GBD cause hierarchy (**eTable 6**) in the  
55  
56 197 GBD 2019 Study [5], we analyzed the leading causes (e.g., falls, pedestrian road injuries,  
57  
58 198 motor vehicle road injuries, conflict and terrorism, etc.) for age-standardized incidence rates  
59  
60

1  
2  
3 199 of TBI/SCI in 204 countries/territories in 2019, and we also analyzed trends in age-  
4  
5 200 standardized incidence rates of TBI/SCI caused by the leading causes in the corresponding  
6  
7  
8 201 countries/territories from 1990 to 2019 (except three causes: conflict and terrorism, exposure  
9  
10 202 to forces of nature, and executions and police conflict, which were considered as fatal  
11  
12  
13 203 discontinuities and defined as random events due to not having predictable time trends in the  
14  
15 204 GBD 2019 Study [5]). More details about definitions of causes and corresponding ICD-  
16  
17  
18 205 9/ICD-10 codes had already been described elsewhere [5]. Fourthly, based on one prior GBD  
19  
20  
21 206 paper by GBD Fracture Collaborators [14], we reported the top three countries/territories  
22  
23  
24 207 with age-standardized incidence rates caused by each cause, and the top three  
25  
26 208 countries/territories with both the largest increase and the largest decrease to explore potential  
27  
28  
29 209 reasons for their cause-specific disease burden. Finally, considering that the data was non-  
30  
31 210 normal distributed (Shapiro-Wilk test had a p-value equal to  $<0.001$ ), the associations  
32  
33  
34 211 between SDI (a composite indicator of income per capita, years of schooling, and fertility  
35  
36 212 rate; SDI ranges from 0 to 1 in the GBD 2019 Study, where 0 represents the lowest income  
37  
38  
39 213 per capita, the fewest years of schooling, and the highest fertility rate, and vice versa [5],  
40  
41  
42 214 **eTable 7**) and the age-standardized YLD rates in 204 countries/territories in 2019 were  
43  
44  
45 215 analyzed by Spearman correlation tests to examine the effect of SDI on the disease burden  
46  
47 216 [15-17]. All statistical analyses and figures drawing were conducted in R program (version  
48  
49  
50 217 4.1.3) and GraphPad Prism (version 7.0.0). Statistical significance was defined as two-tailed  
51  
52 218  $P<0.05$ .

53  
54  
55 219

## 56 57 220 **Patient and Public Involvement Statement**

58  
59  
60

221

222 None.

223

224 **Results**

225

226 **Global, Regional, and National Disease Burden**

227

228 Globally, TBI had 27.16 (95% UI, 23.36 to 31.42) million new cases, 48.99 (46.84 to 51.32)  
229 million prevalent cases, and 7.08 (5.00 to 9.59) million YLDs in 2019 (**Table 1; eTables 8-**  
230 **10**). There were 346 (95% UI, 298 to 401) cases per 100,000 population, 599 (573 to 627)  
231 cases per 100,000 population, and 87 (61 to 117) YLDs per 100,000 population for age-  
232 standardized incidence rates, age-standardized prevalence estimates, and age-standardized  
233 YLD rates of TBI in 2019, respectively (**Figure 1; eFigures 1-3**). SCI had 0.91 (0.71 to 1.16)  
234 million new cases, 20.64 (18.93 to 23.61) million prevalent cases, and 6.20 (4.47 to 8.16)  
235 million YLDs in 2019 (**Table 2; eTables 11-13**). There were 12 (9 to 15) cases per 100,000  
236 population, 253 (231 to 290) cases per 100,000 population, and 76 (55 to 100) YLDs per  
237 100,000 population for age-standardized incidence rates, age-standardized prevalence  
238 estimates, and age-standardized YLD rates of SCI in 2019, respectively (**eFigures 4-6**).  
239 Global age-standardized incidence rates of TBI decreased significantly by -5.5% (95% UI, -  
240 8.9% to -3.0%) from 1990 to 2019. By contrast, there was no significant change in global age-  
241 standardized incidence rates of SCI (-6.1% [-17.3% to 1.5%]) from 1990 to 2019. Regional  
242 and national TBI/SCI burden were described in the **eResults**.

243

## 244 **Leading Causes by Country and Territory**

245

246 Considering the cause-specific age-standardized incidence rates of TBI in 2019, falls was the  
247 leading cause in 74% (150/204) of countries/territories, followed by pedestrian road injuries  
248 (14%, 29/204), motor vehicle road injuries (5%, 11/204), and conflict and terrorism (2%,  
249 4/204) (**Figure 2; eTable 14**). The top three countries/territories with age-standardized  
250 incidence rates by falls were Finland (418 [324 to 539] cases per 100,000 population),  
251 Slovenia (401 [320 to 504] cases per 100,000 population), and Croatia (400 [318 to 501]  
252 cases per 100,000 population) (out of 150 countries/territories), by pedestrian road injuries  
253 were Mozambique (103 [76 to 134] cases per 100,000 population), Ghana (83 [61 to 109]  
254 cases per 100,000 population), and Guinea-Bissau (71 [50 to 95] cases per 100,000  
255 population) (out of 29 countries/territories), by motor vehicle road injuries were Comoros (86  
256 [61 to 117] cases per 100,000 population), Mauritania (79 [56 to 109] cases per 100,000  
257 population), and Cameroon (75 [52 to 103] cases per 100,000 population) (out of 11  
258 countries/territories), and by conflict and terrorism were Afghanistan (356 [134 to 798] cases  
259 per 100,000 population), Yemen (256 [103 to 590] cases per 100,000 population), and Syrian  
260 Arab Republic (180 [68 to 394] cases per 100,000 population) (out of 4 countries/territories)  
261 (**Figure 3**).

262

263 For SCI, falls was the leading cause for age-standardized incidence rates in 97% (198/204) of  
264 countries/territories in 2019, followed by conflict and terrorism (3%, 6/204) (**eTable 15**). The

1  
2  
3 265 top three countries/territories with age-standardized incidence rates by falls were Greenland  
4  
5 266 (23 [15 to 34] cases per 100,000 population), Norway (21 [14 to 33] cases per 100,000  
6  
7  
8 267 population), and Sweden (19 [12 to 29] cases per 100,000 population) (out of 198  
9  
10 268 countries/territories), and by conflict and terrorism were Afghanistan (40 [8 to 128] cases per  
11  
12  
13 269 100,000 population), Yemen (22 [5 to 66] cases per 100,000 population), and Syrian Arab  
14  
15  
16 270 Republic (21 [4 to 64] cases per 100,000 population) (out of 6 countries/territories).  
17  
18 271 Percentage changes of cause-specific TBI/SCI burden were described in the **eResults**.  
19  
20  
21 272  
22

### 23 273 **Disease Burden by Socio-demographic Index**

24  
25  
26 274  
27  
28  
29 275 Generally, a positive association was found between age-standardized YLD rates of TBI and  
30  
31 276 SDI in 204 countries/territories in 2019 ( $\rho=0.42$ ,  $P<.001$ ) (**eFigure 7**). SCI on the other hand,  
32  
33  
34 277 had no statistical association with SDI ( $\rho=-0.05$ ,  $P=0.49$ ), although the SCI burden in a few  
35  
36 278 countries/territories, such as Afghanistan, far exceeded those of others.  
37  
38  
39 279  
40  
41

### 42 280 **Discussion**

43  
44 281  
45  
46  
47 282 This study provided the most up-to-date burden of TBI and SCI using GBD 2019 data. It also  
48  
49 283 presented the variations between the leading causes of TBI/SCI in 204 countries/territories.  
50  
51

52 284 Finally, it explored the associations between each national SDI and the burden of TBI/SCI.  
53  
54  
55 285

### 57 286 **Incidence of TBI/SCI**

1  
2  
3 287  
4  
5 288 Globally, the age-standardized incidence rates of TBI significantly decreased since 1990. This  
6  
7  
8 289 improvement may reflect the benefits of global initiatives to reduce TBI rates. For example,  
9  
10 290 major efforts have focused on road safety and reduced road-related injuries, a leading cause of  
11  
12  
13 291 TBI globally [18]. In 2004, the United Nations General Assembly and the World Health  
14  
15  
16 292 Organization passed resolutions calling for preventive measures against road injuries [19].  
17  
18 293 The resolutions were championed in many countries/territories successively [19]. The age-  
19  
20  
21 294 standardized TBI incidence rates decreased significantly from 1990 to 2019 by -7.2% (-11.9%  
22  
23  
24 295 to -2.0%) in Oman, -20.3% (-22.5% to -17.9%) in Russia, and -9.8% (-13.6% to -5.4%) in  
25  
26 296 Sweden, demonstrating the effectiveness of their interventions.  
27  
28

29 297  
30  
31 298 Unfortunately, the global age-standardized SCI incidence rates did not significantly change  
32  
33  
34 299 despite the decreases in TBI. Although we used the same GBD 2019 data, this conclusion  
35  
36 300 differs from Ding *et al.*'s finding that the global age-standardized incidence rates of SCI  
37  
38  
39 301 decreased since 1990 [6]. Ding *et al.* calculated the temporal trends of the global age-  
40  
41  
42 302 standardized incidence rates of SCI using the Estimated Annual Percentage Change (EAPC)  
43  
44 303 [6]. The EAPC was based on a linear regression mode of the age-standardized rates and the  
45  
46  
47 304 calendar year [20]. However, EAPC can be biased in modeling injuries from natural disasters  
48  
49  
50 305 or wars; if included, it inflates estimates in volatile regions [21]. Furthermore, Ding *et al.*  
51  
52 306 misinterpreted their statistical results [6]. The EAPC was -0.08 but had a 95% confidence  
53  
54  
55 307 interval of -0.24 to 0.09 [6]. By focusing only on the point estimate of -0.08 and neglecting  
56  
57  
58 308 the confidence interval, they failed to convey that the confidence interval crossed zero. That  
59  
60



1  
2  
3 309 approach may confuse and bring biased information to policymakers [22]. Our study showed  
4  
5 310 a non-significant change in the global age-standardized incidence rates of SCI (-6.1% [-17.3%  
6  
7  
8 311 to 1.5%]). The lack of SCI change may be because motor vehicle accidents are a major cause  
9  
10 312 of TBI but not SCI. As discussed below, other interventions may be required to reduce SCI  
11  
12  
13 313 [23, 24].  
14  
15  
16 314

### 17 18 315 **Causes of TBI/SCI** 19

20  
21 316  
22  
23 317 One challenge in any global effort to reduce falls is the aging population. The global  
24  
25 318 population over the age of 65 rose from 6.2% in 1990 to 9.1% in 2019 [25]. Falls are more  
26  
27 319 common in older than younger adults owing to sarcopenia, osteoporosis, sleeping disturbance,  
28  
29 320 multimorbidity, and frailty [13]. Several countries/territories with high age-standardized  
30  
31 321 incidence rates of TBI/SCI by falls also have percentages of older adults that far exceeds the  
32  
33 322 world average of 9.1% of the population. Examples include Finland (22.1% of the population  
34  
35 323 over the age of 65 in 2019), Slovenia (20.2%), Croatia (20.9%), Norway (17.3%), and  
36  
37 324 Sweden (20.2%) [25]. Although some components of falls are modifiable, some  
38  
39 325 countries/territories have unique challenges due to their geographical features. Finland,  
40  
41 326 Norway, and Sweden have cold climates and unique environmental risk factors (i.e., icy  
42  
43 327 sidewalks) that may increase their populations' fall risk [26, 27]. Environmental risks may  
44  
45 328 need to be prioritized in these countries/territories, particularly as their populations age.  
46  
47  
48  
49  
50  
51  
52  
53  
54  
55 329

1  
2  
3 330 This study also examined changes in age-standardized incidence rates by falls. Turkey had the  
4  
5 331 largest increases from 1990 to 2019 (TBI: 100.3% [88.8% to 114.5%], SCI: 110.5% [97.3%  
6  
7  
8 332 to 125.4%]). Armenia had a significant decrease in both TBI (-35.1% [-41.2% to -28.4%])  
9  
10 333 and SCI (-33.9% [-39.3% to -27.9%]). The reasons for this change were unknown but may be  
11  
12 334 related to changes in resource allocation. The gross domestic product (GDP, current USD) in  
13  
14 335 Armenia increased from \$2.26 billion in 1990 to \$13.86 billion in 2019, leading to increased  
15  
16 336 healthcare spending that may have improved public healthcare education [28-30]. By contrast,  
17  
18 337 Turkey faced economic difficulty in recent years; its GDP decreased from \$957.78 billion in  
19  
20 338 2013 to \$761 billion in 2019, which may have contributed to the significant increases in this  
21  
22 339 study [30].  
23  
24  
25  
26  
27  
28  
29  
30

31 341 Road injuries were the leading cause of TBI in 20% (40/204) of the countries/territories.  
32  
33 342 There was a higher prevalence in African countries/territories. One possible reason for the  
34  
35 343 high prevalence in Africa may be the rapid increase in motor vehicle ownership [31], without  
36  
37 344 sufficient road infrastructure (i.e., roads and traffic safety) [32-35]. A previous study found  
38  
39 345 non-adherence to traffic regulations, poorly maintained roads, inadequate traffic signage, and  
40  
41 346 a lack of pedestrian protections as possible reasons behind Mozambique's high age-  
42  
43 347 standardized incidence rates of TBI [36]. The lack of sufficient safety around motor vehicles  
44  
45 348 is not limited to Africa. The Dominican Republic also recorded high age-standardized TBI  
46  
47 349 incidence rates; this was also attributed to traffic safety, although the reported reasons were  
48  
49 350 high rates of people driving while intoxicated and limited policing of traffic violations [37].  
50  
51  
52 351 The high burden of TBI by road injuries in these countries/territories demonstrates that  
53  
54  
55  
56  
57  
58  
59  
60

1  
2  
3 352 despite some countries/territories having successfully reduced their road injuries, challenges  
4  
5 353 remain in others. Furthermore, the variations in causes and rates of TBI in this study suggest  
6  
7  
8 354 that global initiatives to reduce rates of motor vehicle accidents or TBI need to consider the  
9  
10 355 unique challenges faced by each country and territory rather than a generalist approach to rate  
11  
12  
13 356 reduction [19].  
14  
15

16 357  
17  
18 358 Finally, conflict and terrorism was the most common cause of TBI/SCI in 2% (4/204) and 3%  
19  
20 359 (6/204) of countries/territories, respectively, such as Afghanistan, Yemen, and Syrian Arab  
21  
22  
23 360 Republic, which are likely attributable to the on-going armed conflicts that have occurred in  
24  
25  
26 361 these countries/territories over many years [38-40].  
27  
28

29 362  
30  
31 363 **TBI/SCI Burden by Socio-demographic Index**  
32  
33  
34 364  
35  
36 365 The burden of TBI was generally higher in countries/territories with higher SDI. One of the  
37  
38  
39 366 reasons for the difference may be disparities in access to healthcare resources [4]. Medical  
40  
41  
42 367 resources are sufficient and easily available in locations with higher SDI, so patients with TBI  
43  
44  
45 368 can be treated and recorded in time. However, medical resources are insufficient in locations  
46  
47 369 with lower SDI, and patients may die of treatable TBI and even fail to receive a diagnostic  
48  
49  
50 370 code. Furthermore, data from countries/territories with higher SDI may be more reliable than  
51  
52  
53 371 locations with lower SDI, so estimates in locations with higher SDI may be closer to the true  
54  
55 372 disease burden [5].  
56

57 373  
58  
59  
60

## 374 **Strengths and Limitations**

375

376 This study had some strengths. First, it provided the most up-to-date global, regional, and  
377 national burden of TBI/SCI from 1990 to 2019. The findings can help policymakers acquire  
378 the most up-to-date epidemiological characteristics of TBI/SCI in 21 GBD regions and 204  
379 countries/territories. Secondly, it presented variations of leading causes of TBI/SCI in 204  
380 different countries/territories even within a same geographical region. For example, the  
381 leading cause of TBI in the Sub-Saharan Africa region varied from falls in Angola to  
382 pedestrian road injuries in Namibia to motor vehicle road injuries in South Africa and conflict  
383 and terrorism in the Central African Republic. Falls were also the leading cause of SCI in  
384 most countries/territories in the North Africa and Middle East (e.g., Saudi Arabia, Egypt,  
385 Qatar); however, conflict and terrorism were the leading cause in Afghanistan, Iraq, Libya,  
386 Syrian Arab Republic, and Yemen. The presentation of variations in different  
387 countries/territories can provide richer information than a regional analysis and help  
388 policymakers identify which causes should be targeted to improve the effectiveness of  
389 preventive interventions.

390

391 This study also had some limitations. First, the data sources relied on patients having medical  
392 records, so reported estimates would underestimate the true incidence. For example, there was  
393 a discrepancy between the annual worldwide estimation of new TBI cases in this study (27.16  
394 million) and other recent expert sources (more than 50 million) [7]. The underestimation may  
395 be attributed to two reasons.

1  
2  
3 396  
4  
5 397 The first reason for underestimation is that the register-based data may not cover all cases. For  
6  
7  
8 398 example, the Nordic countries and the United States are considered to have reliable statistics,  
9  
10 399 but there are still patients treated at facilities that are not covered by registries (e.g., private  
11  
12 400 healthcare) [7, 41]. Further, many patients with mild TBI go untreated and, therefore,  
13  
14 401 unrecorded; population-based studies with a broad definition of TBI show significantly higher  
15  
16 402 TBI incidence rates than those based on hospital discharge rates [7]. The second reason for  
17  
18 403 underestimation is that clinical diagnosis codes may not accurately match injuries, especially  
19  
20 404 in patients with multi-trauma. For example, some patients may experience both TBI/SCI from  
21  
22 405 a traumatic event, but TBI would not be matched to the individual because SCI had a higher  
23  
24 406 rank than TBI in the GBD severity hierarchy [5]. This is because after the GBD Traumatic  
25  
26 407 Brain Injury and Spinal Cord Injury Collaborators tried to apportion co-occurring non-fatal  
27  
28 408 injuries using regression methods, they found that many long-term disabilities were assigned  
29  
30 409 to seemingly trivial non-fatal injury categories (e.g., open wounds/bruises), thus pulling  
31  
32 410 disability away from more serious non-fatal injury outcomes (e.g., TBI/SCI) [4]. Therefore,  
33  
34 411 this study followed the method that assigns one non-fatal injury case to the most severe of any  
35  
36 412 co-occurring non-fatal injuries according to the GBD severity hierarchy [4, 5]. This method  
37  
38 413 was also utilized in the paper by the GBD Traumatic Brain Injury and Spinal Cord Injury  
39  
40 414 Collaborators published in the Lancet Neurology [4].  
41  
42  
43  
44  
45  
46  
47  
48  
49  
50

51  
52 415  
53  
54 416 Second, this study might also underestimate the true period prevalence. The GBD 2019 Study  
55  
56 417 calculated the period prevalence of non-fatal injuries through probabilities of permanent  
57  
58  
59  
60

1  
2  
3 418 health loss [5]. Permanent health loss relates to the probability of patients (one year after the  
4  
5 419 injury) returning to a health status with more disability than their pre-injury health status [5].  
6  
7  
8 420 However, the probabilities of permanent health loss assessed in the GBD Study may be  
9  
10 421 grossly underestimated, especially for TBI, because accurate TBI prevalence data is even  
11  
12 422 more limited than incidence data, especially in low/middle-income countries; and TBI is not  
13  
14 423 an isolated event but can have variable long-term consequences, including dementia, stroke,  
15  
16 424 parkinsonism, and epilepsy [7]. For example, a large study from a Swedish registry found  
17  
18 425 higher probabilities of premature mortality, psychiatric inpatient admission/outpatient visits,  
19  
20 426 disability pension, welfare reciprocity, and low educational attainment after even a mild TBI  
21  
22 427 compared to uninjured siblings [42]. Furthermore, the associations between TBI and long-  
23  
24 428 term neurological diseases remain poorly understood; many sequelae other than those  
25  
26 429 mentioned above have not been considered, leading to an underestimation of the true TBI  
27  
28 430 period prevalence [7]. Referring to the reviewer' comments, we also attempted but could not  
29  
30 431 calculate the lifetime prevalence of TBI/SCI through the GBD data because, while  
31  
32 432 longitudinal cohort or survey analysis is commonly used to calculate lifetime prevalence [43,  
33  
34 433 44], the GBD Study is a cross-sectional analysis conducted iteratively on an annual basis [5].  
35  
36 434 Short-term disability caused by non-fatal injuries is assumed to last less than one year in the  
37  
38 435 GBD Study, which means that the short-term disability after TBI/SCI in a given year may not  
39  
40 436 be calculated for prevalence in future iterations [5].  
41  
42 437

43  
44 438 Third, a weakness of this study is the ability to estimate incidence in countries with lower-  
45  
46 439 quality data. Estimates in some data-sparse countries/territories were modeled and predicted  
47  
48  
49  
50  
51  
52  
53  
54  
55  
56  
57  
58  
59  
60

1  
2  
3 440 by borrowing estimates from data-rich countries/territories [5]. Therefore, the estimates of the  
4  
5 441 data-sparse countries/territories (e.g., Democratic People's Republic of Korea) might have a  
6  
7  
8 442 greater deviation than the true incidence. Furthermore, the cause-specific burden (that is, the  
9  
10 443 leading cause) of TBI/SCI in some data-sparse countries/territories should be interpreted  
11  
12  
13 444 carefully. For example, it is logically difficult to explain why falls have surpassed traffic  
14  
15  
16 445 accidents as the leading cause of SCI in many population-rich Asian countries/territories (e.g.,  
17  
18 446 Malaysia) with chaotic traffic.

19  
20  
21 447  
22  
23 448 Fourth, the GBD 2019 Study did not link TBI/SCI with risk factors such as behavioral factors  
24  
25  
26 449 (e.g., alcohol use), so we could not assess any associations between the two (e.g., disease  
27  
28  
29 450 burden attributable to certain risk factors) [45].

30  
31 451  
32  
33  
34 452 Finally, the GBD Traumatic Brain Injury and Spinal Cord Injury Collaborators defined  
35  
36 453 TBI/SCI by ICD-9/ICD-10 codes through physician review. However, with reference to the  
37  
38  
39 454 reviewer's comments, there may be a minor error probably not reflected in the results in the  
40  
41  
42 455 Lancet Neurology paper; the ICD-10 code S06.0 (concussion) can be considered a mild TBI,  
43  
44 456 but S06.1 (traumatic cerebral edema) in the published paper cannot [4].

45  
46  
47 457  
48  
49  
50 458 **Implications for Future Studies**

51  
52 459  
53  
54  
55 460 First, population-based epidemiological studies may be improved in the future through  
56  
57 461 standardized definitions (e.g., standardized criteria for diagnosis), methods (e.g., case  
58  
59  
60

1  
2  
3 462 ascertainment based on multiple, overlapping sources of information, such as hospitals,  
4  
5 463 outpatient clinics, general practitioners, and death certificates), and data presentation (e.g.,  
6  
7  
8 464 collection of a complete calendar year of data) [7]. These improvements would be especially  
9  
10 465 helpful in data-sparse locations to facilitate comparisons between countries/territories. Second,  
11  
12  
13 466 there is a need for better ways to characterize the currently under-recognized risk of long-term  
14  
15  
16 467 disabling sequelae to bring estimates closer to the true period prevalence, especially for mild  
17  
18 468 TBI. Furthermore, we hope that the GBD Collaborators include lifetime prevalence in future  
19  
20  
21 469 iterations to estimate the global impact of TBI/SCI accurately. Last, we hope that the GBD  
22  
23  
24 470 Collaborators will include the burden of TBI/SCI attributable to risk factors; this would  
25  
26 471 provide more detailed results on the causes of TBI/SCI and allow for more targeted  
27  
28  
29 472 preventative strategies.

30  
31 473

## 34 474 **Conclusions**

35  
36 475

37  
38  
39 476 In conclusion, the global age-standardized incidence rates of TBI had a significant decrease  
40  
41  
42 477 since 1990, whereas SCI had no significant change. Falls was the leading cause of TBI/SCI in  
43  
44 478 74% (150/204) and 97% (198/204) of countries/territories, respectively, but the variations of  
45  
46  
47 479 leading causes of TBI/SCI did exist between countries/territories, even within a same  
48  
49  
50 480 geographic region. Although declining, high burden of TBI remained a concern in both higher  
51  
52 481 and lower SDI countries/territories. High burden of SCI from falls in almost all  
53  
54  
55 482 countries/territories demonstrates the need for falls reduction to be a global priority now and  
56  
57 483 into the future, but priorities may vary between countries/territories.



1  
2  
3 4844  
5 485 **Availability of Data and Materials**6  
7  
8 4869  
10 487 The raw data were available from the GBD Results Tool (<https://vizhub.healthdata.org/gbd->  
11 [results/](https://vizhub.healthdata.org/gbd-)) and the supplementary materials.  
12  
13 48814  
15  
16 48917  
18 490 **Competing Interests**19  
20  
21 49122  
23 492 The authors declare that they have no conflict of interest.  
24  
25

26 493

27  
28 494 **Funding**29  
30  
31 49532  
33 496 This study was funded by Taishan Scholars Program of Shandong Province-Young Taishan  
34  
35  
36 497 Scholars (tsqn201909197).  
37  
38

39 498

40  
41 499 **Authors' Contributions**42  
43  
44 50045  
46 501 H.Z., S.F., and L.C. contributed to the conception and design of the study. B.G. and D.B.A.47  
48 502 contributed to the acquisition, analysis, and interpretation of data. B.G. and D.B.A.49  
50 503 contributed to drafting the text or preparing the figures. All authors reviewed the manuscript.  
51  
5253  
54 50455  
56 505 **Acknowledgements**  
57  
58  
59  
60

1  
2  
3 506

4  
5 507 We thank the Institute for Health Metrics and Evaluation at the University of Washington and  
6  
7  
8 508 all collaborators involved in the GBD 2019 study to make the data accessible to the public.  
9

10 509

11  
12  
13 510 **Ethical Approval**  
14

15 511

16  
17  
18 512 The data used in this study was publicly available and did not contain any independently  
19  
20  
21 513 identifiable information. Therefore, no ethical approval or patient consent was required for  
22  
23  
24 514 this study.  
25  
26  
27  
28  
29  
30  
31  
32  
33  
34  
35  
36  
37  
38  
39  
40  
41  
42  
43  
44  
45  
46  
47  
48  
49  
50  
51  
52  
53  
54  
55  
56  
57  
58  
59  
60

**References**

1. Maas AI, Stocchetti N, Bullock R Moderate and severe traumatic brain injury in adults. *Lancet Neurol* 2008; 7:728-741. [https://doi.org/10.1016/s1474-4422\(08\)70164-9](https://doi.org/10.1016/s1474-4422(08)70164-9)
2. Ahuja CS, Wilson JR, Nori S, Kotter MRN, Druschel C, Curt A, Fehlings MG Traumatic spinal cord injury. *Nat Rev Dis Primers* 2017; 3:17018. <https://doi.org/10.1038/nrdp.2017.18>
3. GBD 2016 Disease and Injury Incidence and Prevalence Collaborators. Global, regional, and national incidence, prevalence, and years lived with disability for 328 diseases and injuries for 195 countries, 1990-2016: a systematic analysis for the Global Burden of Disease Study 2016. *Lancet* 2017; 390:1211-1259. [https://doi.org/10.1016/s0140-6736\(17\)32154-2](https://doi.org/10.1016/s0140-6736(17)32154-2)
4. GBD 2016 Traumatic Brain Injury and Spinal Cord Injury Collaborators. Global, regional, and national burden of traumatic brain injury and spinal cord injury, 1990-2016: a systematic analysis for the Global Burden of Disease Study 2016. *Lancet Neurol* 2019; 18:56-87. [https://doi.org/10.1016/s1474-4422\(18\)30415-0](https://doi.org/10.1016/s1474-4422(18)30415-0)
5. GBD 2019 Diseases and Injuries Collaborators. Global burden of 369 diseases and injuries in 204 countries and territories, 1990-2019: a systematic analysis for the Global Burden of Disease Study 2019. *Lancet* 2020; 396:1204-1222. [https://doi.org/10.1016/s0140-6736\(20\)30925-9](https://doi.org/10.1016/s0140-6736(20)30925-9)
6. Ding W, Hu S, Wang P, Kang H, Peng R, Dong Y, Li F Spinal Cord Injury: The Global Incidence, Prevalence, and Disability from the Global Burden of Disease Study 2019. *Spine (Phila Pa 1976)* 2022; <https://doi.org/10.1097/brs.0000000000004417>
7. Maas AIR, Menon DK, Adelson PD, Andelic N, Bell MJ, Belli A, Bragge P, Brazinova A, Büki A, Chesnut RM, Citerio G, Coburn M, Cooper DJ, Crowder AT, Czeiter E, Czosnyka M, Diaz-Arrastia R, Dreier JP, Duhaime AC, Ercole A, van Essen TA, Feigin VL, Gao G, Giacino J, Gonzalez-Lara LE, Gruen RL, Gupta D, Hartings JA, Hill S, Jiang JY, Ketharanathan N, Kompanje EJO, Lanyon L, Laureys S, Lecky F, Levin H, Lingsma HF, Maegele M, Majdan M, Manley G, Marsteller J, Mascia L, McFadyen C, Mondello S, Newcombe V, Palotie A, Parizel PM, Peul W, Piercy J, Polinder S, Puybasset L, Rasmussen TE, Rossaint R, Smielewski P, Söderberg J, Stanworth SJ, Stein MB, von Steinbüchel N, Stewart W, Steyerberg EW, Stocchetti N, Synnot A, Te Ao B, Tenovuo O, Theadom A, Tibboel D, Videtta W, Wang KKW, Williams WH, Wilson L, Yaffe K Traumatic brain injury: integrated approaches to improve prevention, clinical care, and research. *Lancet Neurol* 2017; 16:987-1048. [https://doi.org/10.1016/s1474-4422\(17\)30371-x](https://doi.org/10.1016/s1474-4422(17)30371-x)
8. Stevens GA, Alkema L, Black RE, Boerma JT, Collins GS, Ezzati M, Grove JT, Hogan DR, Hogan MC, Horton R, Lawn JE, Marušić A, Mathers CD, Murray CJ, Rudan I, Salomon JA, Simpson PJ, Vos T, Welch V Guidelines for Accurate and Transparent Health Estimates Reporting: the GATHER statement. *Lancet* 2016; 388:e19-e23. [https://doi.org/10.1016/s0140-6736\(16\)30388-9](https://doi.org/10.1016/s0140-6736(16)30388-9)
9. von Elm E, Altman DG, Egger M, Pocock SJ, Gøtzsche PC, Vandenbroucke JP The Strengthening the Reporting of Observational Studies in Epidemiology (STROBE) statement: guidelines for reporting observational studies. *Lancet* 2007; 370:1453-

- 1  
2 560 1457. [https://doi.org/10.1016/s0140-6736\(07\)61602-x](https://doi.org/10.1016/s0140-6736(07)61602-x)  
3  
4 561 10. GBD 2019 Universal Health Coverage Collaborators. Measuring universal health  
5 562 coverage based on an index of effective coverage of health services in 204 countries  
6 563 and territories, 1990-2019: a systematic analysis for the Global Burden of Disease  
7 564 Study 2019. *Lancet* 2020; 396:1250-1284. [https://doi.org/10.1016/s0140-6736\(20\)30750-9](https://doi.org/10.1016/s0140-6736(20)30750-9)  
8 565  
9  
10 566 11. Salomon JA, Haagsma JA, Davis A, de Noordhout CM, Polinder S, Havelaar AH,  
11 567 Cassini A, Devleeschauwer B, Kretzschmar M, Speybroeck N, Murray CJ, Vos T  
12 568 Disability weights for the Global Burden of Disease 2013 study. *Lancet Glob Health*  
13 569 2015; 3:e712-723. [https://doi.org/10.1016/s2214-109x\(15\)00069-8](https://doi.org/10.1016/s2214-109x(15)00069-8)  
14  
15 570 12. GBD 2019 Demographics Collaborators. Global age-sex-specific fertility, mortality,  
16 571 healthy life expectancy (HALE), and population estimates in 204 countries and  
17 572 territories, 1950-2019: a comprehensive demographic analysis for the Global Burden  
18 573 of Disease Study 2019. *Lancet* 2020; 396:1160-1203. [https://doi.org/10.1016/s0140-6736\(20\)30977-6](https://doi.org/10.1016/s0140-6736(20)30977-6)  
19 574  
20 575 13. Ye P, Er Y, Wang H, Fang L, Li B, Ivers R, Keay L, Duan L, Tian M Burden of falls  
21 576 among people aged 60 years and older in mainland China, 1990-2019: findings from  
22 577 the Global Burden of Disease Study 2019. *Lancet Public Health* 2021; 6:e907-e918.  
23 578 [https://doi.org/10.1016/s2468-2667\(21\)00231-0](https://doi.org/10.1016/s2468-2667(21)00231-0)  
24  
25 579 14. GBD 2019 Fracture Collaborators. Global, regional, and national burden of bone  
26 580 fractures in 204 countries and territories, 1990-2019: a systematic analysis from the  
27 581 Global Burden of Disease Study 2019. *Lancet Healthy Longev* 2021; 2:e580-e592.  
28 582 [https://doi.org/10.1016/s2666-7568\(21\)00172-0](https://doi.org/10.1016/s2666-7568(21)00172-0)  
29  
30 583 15. Srivastav A, Richard CL, McRell AS, Stropolis M The Unintended Consequence of  
31 584 Novel Coronavirus (COVID-19) Pandemic on Racial Inequities Associated With  
32 585 Adverse Childhood Experiences (ACEs): Findings From a Population-Based Study.  
33 586 *Front Public Health* 2021; 9:701887. <https://doi.org/10.3389/fpubh.2021.701887>  
34  
35 587 16. GBD 2016 Stroke Collaborators. Global, regional, and national burden of stroke,  
36 588 1990-2016: a systematic analysis for the Global Burden of Disease Study 2016.  
37 589 *Lancet Neurol* 2019; 18:439-458. [https://doi.org/10.1016/s1474-4422\(19\)30034-1](https://doi.org/10.1016/s1474-4422(19)30034-1)  
38  
39 590 17. Jin X, Ren J, Li R, Gao Y, Zhang H, Li J, Zhang J, Wang X, Wang G Global burden  
40 591 of upper respiratory infections in 204 countries and territories, from 1990 to 2019.  
41 592 *EClinicalMedicine* 2021; 37:100986. <https://doi.org/10.1016/j.eclinm.2021.100986>  
42  
43 593 18. World Health Organization. Road traffic injuries. Available at:  
44 594 <https://www.who.int/news-room/fact-sheets/detail/road-traffic-injuries>.  
45  
46 595 19. Hyder AA, Hoe C, Hajar M, Peden M The political and social contexts of global road  
47 596 safety: challenges for the next decade. *Lancet* 2022; 400:127-136.  
48 597 [https://doi.org/10.1016/s0140-6736\(22\)00917-5](https://doi.org/10.1016/s0140-6736(22)00917-5)  
49  
50 598 20. Liu Z, Jiang Y, Yuan H, Fang Q, Cai N, Suo C, Jin L, Zhang T, Chen X The trends in  
51 599 incidence of primary liver cancer caused by specific etiologies: Results from the  
52 600 Global Burden of Disease Study 2016 and implications for liver cancer prevention. *J*  
53 601 *Hepatol* 2019; 70:674-683. <https://doi.org/10.1016/j.jhep.2018.12.001>  
54  
55 602 21. Mohammadi E, Villeneuve LM, Smith ZA Letter to the Editor: "Spinal Cord Injury  
56 603 The Global Incidence, Prevalence, and Disability From the Global Burden of Disease  
57 604 Study 2019". *Spine* (Phila Pa 1976)

- 2023;<https://doi.org/10.1097/brs.0000000000004726>
22. Greenland S, Senn SJ, Rothman KJ, Carlin JB, Poole C, Goodman SN, Altman DG Statistical tests, P values, confidence intervals, and power: a guide to misinterpretations. *Eur J Epidemiol* 2016; 31:337-350. <https://doi.org/10.1007/s10654-016-0149-3>
23. World Health Organization. Falls. Available at: <https://www.who.int/news-room/fact-sheets/detail/falls>.
24. World Health Organization. Spinal cord injury. Available at: <https://www.who.int/news-room/fact-sheets/detail/spinal-cord-injury>.
25. The World Bank. Population (age group as % of total population). Available at: <https://genderdata.worldbank.org/indicators/sp-pop-zs/?age=65%2B&view=trend>.
26. Ala-Seppälä H, Heino I, Frantzén J, Takala RS, Katila AJ, Kyllönen A, Maanpää HR, Posti JP, Tallus J, Tenovuo O Injury profiles, demography and representativeness of patients with TBI attending a regional emergency department. *Brain Inj* 2016; 30:1062-1067. <https://doi.org/10.3109/02699052.2016.1170880>
27. WorldAtlas. Nordic Countries. Available at: <https://www.worldatlas.com/articles/nordic-countries.html>.
28. Chekijian S, Truzyan N, Stepanyan T, Bazarchyan A Healthcare in transition in the Republic of Armenia: the evolution of emergency medical systems and directions forward. *Int J Emerg Med* 2021; 14:5. <https://doi.org/10.1186/s12245-020-00328-3>
29. Peek-Asa C, Coman MA, Zorn A, Chikhladze N, Cebanu S, Tadevosyan A, Hamann CJ Association of traumatic brain injury severity and time to definitive care in three low-middle-income European countries. *Inj Prev* 2022; 28:54-60. <https://doi.org/10.1136/injuryprev-2020-044049>
30. The World Bank. GDP (current US\$). Available at: <https://data.worldbank.org/indicator/NY.GDP.MKTP.CD?page=1>.
31. Frances IU, Maxwell UN, Harold CM, Donald CO, Uloma J Determinants of Vehicle Ownership in Nigeria. *SAGE Open* 2020; 10:<https://doi.org/10.1177/2158244020922970>
32. Embolo FN, Bellamkonda N, Dickson D, Motwani G, Mbeboh SN, Mbiarikai M, Oben E, Oke R, Dicker RA, Juillard C, Christie SA, Chichom-Mefire A Epidemiology of traumatic brain injury based on clinical symptoms amongst inhabitants of the Southwest Region of Cameroon: a community-based study. *Brain Inj* 2021; 35:1184-1191. <https://doi.org/10.1080/02699052.2021.1957150>
33. Takoukam R, Kanmounye US, Robertson FC, Zimmerman K, Nguemba S, Lartigue JW, Park KB, Figuim B, Esene I Prehospital Conditions and Outcomes After Craniotomy for Traumatic Brain Injury Performed Within 72 Hours in Central Cameroon: A Cross-Sectional Study. *World Neurosurg* 2020; 142:e238-e244. <https://doi.org/10.1016/j.wneu.2020.06.182>
34. Laeke T, Tirsit A, Kassahun A, Sahlu A, Debebe T, Yesehak B, Masresha S, Deyassa N, Moen BE, Lund-Johansen M, Sundstrøm T Prospective Study of Surgery for Traumatic Brain Injury in Addis Ababa, Ethiopia: Trauma Causes, Injury Types, and Clinical Presentation. *World Neurosurg* 2021; 149:e460-e468. <https://doi.org/10.1016/j.wneu.2021.02.003>
35. Ackah M, Gazali Salifu M, Osei Yeboah C Estimated incidence and case fatality rate

- 1  
2 650 of traumatic brain injury among children (0-18 years) in Sub-Saharan Africa. A  
3 651 systematic review and meta-analysis. PLoS One 2021; 16:e0261831.  
4 652 <https://doi.org/10.1371/journal.pone.0261831>  
5  
6 653 36. Nizamo H, Meyrowitsch DW, Zacarias E, Konradsen F Mortality due to injuries in  
7 654 Maputo City, Mozambique. Int J Inj Contr Saf Promot 2006; 13:1-6.  
8 655 <https://doi.org/10.1080/17457300500151705>  
9  
10 656 37. Reddy SP, Walsh MS, Paulino-Ramirez R, Florenzán J, Fernández J, Nwariaku FE,  
11 657 Abdelnaby A Neurologic injuries following road traffic accidents in the Dominican  
12 658 Republic: Examining causes and potential solutions. Traffic Inj Prev 2019; 20:690-  
13 659 695. <https://doi.org/10.1080/15389588.2019.1643016>  
14  
15 660 38. The L Afghanistan: the international community must act. Lancet 2021; 398:1851.  
16 661 [https://doi.org/10.1016/s0140-6736\(21\)02535-6](https://doi.org/10.1016/s0140-6736(21)02535-6)  
17  
18 662 39. The United Nations. UN News Global perspective Human stories. Available at:  
19 663 <https://news.un.org/en/story/2021/09/1101162>.  
20  
21 664 40. International Committee of The Red Cross. War in Yemen. Available at:  
22 665 <https://www.icrc.org/en/war-yemen>.  
23  
24 666 41. Cota MR, Moses AD, Jikaria NR, Bittner KC, Diaz-Arrastia RR, Latour LL, Turtzo  
25 667 LC Discordance between Documented Criteria and Documented Diagnosis of  
26 668 Traumatic Brain Injury in the Emergency Department. J Neurotrauma 2019; 36:1335-  
27 669 1342. <https://doi.org/10.1089/neu.2018.5772>  
28  
29 670 42. Sariaslan A, Sharp DJ, D'Onofrio BM, Larsson H, Fazel S Long-Term Outcomes  
30 671 Associated with Traumatic Brain Injury in Childhood and Adolescence: A Nationwide  
31 672 Swedish Cohort Study of a Wide Range of Medical and Social Outcomes. PLoS Med  
32 673 2016; 13:e1002103. <https://doi.org/10.1371/journal.pmed.1002103>  
33  
34 674 43. McKinlay A, Grace RC, Horwood LJ, Fergusson DM, Ridder EM, MacFarlane MR  
35 675 Prevalence of traumatic brain injury among children, adolescents and young adults:  
36 676 prospective evidence from a birth cohort. Brain Inj 2008; 22:175-181.  
37 677 <https://doi.org/10.1080/02699050801888824>  
38  
39 678 44. Whiteneck GG, Cuthbert JP, Corrigan JD, Bogner JA Prevalence of Self-Reported  
40 679 Lifetime History of Traumatic Brain Injury and Associated Disability: A Statewide  
41 680 Population-Based Survey. J Head Trauma Rehabil 2016; 31:E55-62.  
42 681 <https://doi.org/10.1097/htr.0000000000000140>  
43  
44 682 45. GBD 2019 Risk Factors Collaborators. Global burden of 87 risk factors in 204  
45 683 countries and territories, 1990-2019: a systematic analysis for the Global Burden of  
46 684 Disease Study 2019. Lancet 2020; 396:1223-1249. [https://doi.org/10.1016/s0140-6736\(20\)30752-2](https://doi.org/10.1016/s0140-6736(20)30752-2)  
47  
48 685  
49 686  
50 687

1  
2 688 **Figure Legends**

3 689

4  
5 690 **Figure 1**

6 691

7 692 Age-standardized incidence rates per 100,000 persons of traumatic brain injury (A) and spinal  
8 693 cord injury (B) by countries/territories, 2019

9 694

10  
11 695 **Figure 2**

12 696

13  
14 697 The leading causes for age-standardized incidence rates of traumatic brain injury (A) and  
15 698 spinal cord injury (B) by countries/territories, 2019

16 699

17  
18 700 **Figure 3**

19 701

20 702 Number of countries/territories by the leading causes for age-standardized incidence rates of  
21 703 traumatic brain injury (TBI) (A) and spinal cord injury (SCI) (B);

22 704

23 705 total countries/territories=204; the listed are the top three countries/territories with age-  
24 706 standardized incidence rates caused by each cause, 2019; and the top three with both the  
25 707 largest increase and the largest decrease, 1990–2019

26  
27  
28  
29  
30  
31  
32  
33  
34  
35  
36  
37  
38  
39  
40  
41  
42  
43  
44  
45  
46  
47  
48  
49  
50  
51  
52  
53  
54  
55  
56  
57  
58  
59  
60

1

Table 1. Incidence of traumatic brain injury in 1990 and 2019, and percentage changes of age-standardized rates by location, 1990–2019

| Location                     | Incidence                       |                                 |                                                |                  |                                                         |
|------------------------------|---------------------------------|---------------------------------|------------------------------------------------|------------------|---------------------------------------------------------|
|                              | Numbers<br>(95% UI)             |                                 | Age-standardized rates per 100,000<br>(95% UI) |                  | Percentage change of age-standardized rates<br>(95% UI) |
|                              | (Year 1990)                     | (Year 2019)                     | (Year 1990)                                    | (Year 2019)      | (Year 1990–Year 2019)                                   |
| Global                       | 18853869 (16215389 to 21806108) | 27160708 (23357251 to 31415052) | 366 (317 to 421)                               | 346 (298 to 401) | -5.5% (-8.9% to -3.0%)                                  |
| High-income North America    | 1120251 (915712 to 1386641)     | 1343020 (1130550 to 1633382)    | 392 (318 to 491)                               | 339 (280 to 416) | -13.7% (-17.1% to -10.0%)                               |
| Australasia                  | 143293 (121566 to 172676)       | 227584 (194914 to 270506)       | 710 (596 to 863)                               | 729 (613 to 889) | 2.6% (-0.9% to 6.0%)                                    |
| High-income Asia Pacific     | 682610 (576222 to 818678)       | 684210 (585181 to 807782)       | 386 (326 to 468)                               | 337 (282 to 414) | -12.8% (-15.8% to -9.6%)                                |
| Western Europe               | 1900129 (1658576 to 2211597)    | 2211884 (1887690 to 2613432)    | 459 (398 to 536)                               | 413 (352 to 494) | -10.0% (-13.2% to -6.4%)                                |
| Southern Latin America       | 202139 (174596 to 238831)       | 282368 (245426 to 331894)       | 409 (354 to 481)                               | 420 (363 to 497) | 2.9% (0.0% to 5.8%)                                     |
| Eastern Europe               | 2111822 (1829230 to 2431948)    | 1596337 (1380438 to 1851604)    | 913 (788 to 1057)                              | 737 (633 to 857) | -19.3% (-20.9% to -17.5%)                               |
| Central Europe               | 1050449 (918891 to 1208699)     | 860390 (750474 to 986981)       | 846 (738 to 979)                               | 729 (631 to 857) | -13.8% (-16.4% to -11.0%)                               |
| Central Asia                 | 286651 (249571 to 332136)       | 354124 (307249 to 410664)       | 410 (358 to 472)                               | 374 (325 to 433) | -8.7% (-11.1% to -6.5%)                                 |
| Central Latin America        | 614132 (514302 to 738706)       | 765677 (649993 to 907182)       | 369 (315 to 437)                               | 306 (260 to 363) | -17.2% (-21.4% to -14.1%)                               |
| Andean Latin America         | 103322 (87106 to 127542)        | 154311 (135039 to 178003)       | 268 (229 to 325)                               | 243 (213 to 279) | -9.5% (-23.6% to 0.1%)                                  |
| Caribbean                    | 104915 (91947 to 119513)        | 155545 (137052 to 177959)       | 299 (263 to 338)                               | 325 (286 to 373) | 8.5% (4.6% to 12.2%)                                    |
| Tropical Latin America       | 402255 (323726 to 499391)       | 525871 (427539 to 647705)       | 261 (213 to 323)                               | 231 (187 to 286) | -11.5% (-14.6% to -8.6%)                                |
| East Asia                    | 1777529 (1457606 to 2180900)    | 3412591 (2824709 to 4137435)    | 146 (120 to 178)                               | 207 (170 to 253) | 41.5% (34.7% to 48.6%)                                  |
| Southeast Asia               | 1221270 (1035226 to 1428941)    | 1653210 (1430159 to 1907523)    | 270 (232 to 312)                               | 246 (213 to 284) | -8.8% (-13.7% to -5.1%)                                 |
| Oceania                      | 12373 (10780 to 14206)          | 29408 (25561 to 33939)          | 213 (186 to 242)                               | 244 (214 to 280) | 14.8% (11.1% to 18.8%)                                  |
| North Africa and Middle East | 1282547 (1094820 to 1500156)    | 1911495 (1624871 to 2305162)    | 373 (320 to 432)                               | 319 (272 to 382) | -14.5% (-24.8% to -4.0%)                                |
| South Asia                   | 4300736 (3694519 to 4984977)    | 8775756 (7523034 to 10153936)   | 450 (388 to 515)                               | 508 (438 to 587) | 13.1% (9.7% to 16.1%)                                   |
| Southern Sub-Saharan Africa  | 115447 (93813 to 140794)        | 147127 (120571 to 177386)       | 233 (192 to 280)                               | 190 (157 to 230) | -18.4% (-21.4% to -15.8%)                               |
| Western Sub-Saharan Africa   | 382027 (311502 to 464214)       | 911247 (745370 to 1110360)      | 224 (187 to 269)                               | 233 (194 to 277) | 3.6% (-0.4% to 6.6%)                                    |
| Eastern Sub-Saharan Africa   | 915689 (614243 to 1558449)      | 904591 (757646 to 1080346)      | 491 (344 to 789)                               | 246 (209 to 286) | -49.8% (-67.5% to -30.4%)                               |
| Central Sub-Saharan Africa   | 124283 (103595 to 154993)       | 253964 (218605 to 293993)       | 244 (207 to 294)                               | 217 (189 to 246) | -11.3% (-19.9% to -5.1%)                                |

Abbreviations: UI, uncertainty interval

33

34

35

36

37

38

39

40

41

42

43

44

45

46



1

Table 2. Incidence of spinal cord injury in 1990 and 2019, and percentage changes of age-standardized rates by location, 1990–2019

|                                     | Incidence                 |                            |                                                |               |                                                         |
|-------------------------------------|---------------------------|----------------------------|------------------------------------------------|---------------|---------------------------------------------------------|
|                                     | Numbers<br>(95% UI)       |                            | Age-standardized rates per 100,000<br>(95% UI) |               | Percentage change of age-standardized rates<br>(95% UI) |
|                                     | (Year 1990)               | (Year 2019)                | (Year 1990)                                    | (Year 2019)   | (Year 1990–Year 2019)                                   |
| <b>Global</b>                       | 595228 (471497 to 766656) | 909001 (706953 to 1156410) | 12 (10 to 16)                                  | 12 (9 to 15)  | -6.1% (-17.3% to 1.5%)                                  |
| <b>High-income North America</b>    | 67501 (52610 to 87116)    | 114001 (85370 to 155645)   | 22 (17 to 28)                                  | 23 (17 to 30) | 4.6% (-0.9% to 10.5%)                                   |
| <b>Australasia</b>                  | 2714 (2200 to 3280)       | 4996 (3949 to 6243)        | 13 (11 to 16)                                  | 14 (11 to 17) | 8.1% (3.3% to 13.2%)                                    |
| <b>High-income Asia Pacific</b>     | 24139 (19331 to 29846)    | 32690 (25123 to 43125)     | 13 (11 to 16)                                  | 12 (9 to 15)  | -9.8% (-13.9% to -6.4%)                                 |
| <b>Western Europe</b>               | 46448 (36453 to 59098)    | 61215 (45912 to 80682)     | 10 (8 to 13)                                   | 10 (8 to 12)  | -5.6% (-9.8% to -2.2%)                                  |
| <b>Southern Latin America</b>       | 3665 (3016 to 4385)       | 5305 (4326 to 6394)        | 8 (6 to 9)                                     | 8 (6 to 9)    | 1.7% (-2.6% to 5.2%)                                    |
| <b>Eastern Europe</b>               | 36775 (29156 to 46344)    | 30092 (23743 to 37989)     | 16 (12 to 20)                                  | 13 (11 to 16) | -15.7% (-18.3% to -12.9%)                               |
| <b>Central Europe</b>               | 19087 (15495 to 23162)    | 17227 (13648 to 21504)     | 15 (12 to 18)                                  | 13 (11 to 16) | -13.0% (-16.2% to -9.8%)                                |
| <b>Central Asia</b>                 | 4887 (4059 to 5797)       | 6252 (5146 to 7468)        | 7 (6 to 9)                                     | 7 (6 to 8)    | -6.8% (-9.5% to -4.3%)                                  |
| <b>Central Latin America</b>        | 19015 (14979 to 24183)    | 24749 (19700 to 30982)     | 13 (10 to 17)                                  | 10 (8 to 13)  | -23.4% (-34.3% to -17.9%)                               |
| <b>Andean Latin America</b>         | 2898 (1837 to 5488)       | 2871 (2381 to 3389)        | 8 (5 to 14)                                    | 5 (4 to 5)    | -39.5% (-66.5% to -11.2%)                               |
| <b>Caribbean</b>                    | 2137 (1747 to 2618)       | 3459 (2814 to 4227)        | 7 (5 to 8)                                     | 7 (6 to 9)    | 8.2% (0.9% to 15.1%)                                    |
| <b>Tropical Latin America</b>       | 21365 (16580 to 27710)    | 33477 (25278 to 44097)     | 16 (12 to 20)                                  | 14 (11 to 19) | -8.1% (-11.5% to -5.1%)                                 |
| <b>East Asia</b>                    | 104274 (79266 to 134082)  | 236241 (173443 to 315144)  | 10 (7 to 13)                                   | 13 (10 to 18) | 39.8% (32.0% to 48.0%)                                  |
| <b>Southeast Asia</b>               | 36808 (28373 to 48545)    | 47473 (37736 to 59770)     | 9 (7 to 12)                                    | 7 (6 to 9)    | -18.7% (-31.8% to -10.7%)                               |
| <b>Oceania</b>                      | 253 (203 to 313)          | 569 (466 to 697)           | 5 (4 to 6)                                     | 5 (4 to 6)    | 10.3% (-2.6% to 19.0%)                                  |
| <b>North Africa and Middle East</b> | 42700 (28665 to 64843)    | 52776 (34780 to 97680)     | 14 (9 to 21)                                   | 9 (6 to 17)   | -32.7% (-60.7% to 8.9%)                                 |
| <b>South Asia</b>                   | 81527 (64240 to 103563)   | 156382 (120425 to 201426)  | 9 (7 to 11)                                    | 9 (7 to 12)   | 5.1% (-7.8% to 12.8%)                                   |
| <b>Southern Sub-Saharan Africa</b>  | 4607 (3525 to 6118)       | 6590 (5072 to 8666)        | 10 (8 to 14)                                   | 9 (7 to 12)   | -12.0% (-16.5% to -8.4%)                                |
| <b>Western Sub-Saharan Africa</b>   | 16168 (11877 to 22347)    | 38162 (28265 to 51944)     | 11 (8 to 15)                                   | 11 (8 to 15)  | 3.4% (-5.4% to 8.0%)                                    |
| <b>Eastern Sub-Saharan Africa</b>   | 54804 (22784 to 133741)   | 29156 (22453 to 37652)     | 30 (14 to 69)                                  | 9 (7 to 12)   | -69.8% (-86.8% to -36.8%)                               |
| <b>Central Sub-Saharan Africa</b>   | 3457 (2080 to 6799)       | 5318 (3976 to 7773)        | 7 (4 to 12)                                    | 5 (4 to 6)    | -29.1% (-48% to -10.3%)                                 |

Abbreviations: UI, uncertainty interval

33

34

35

36

37

38

39

40

41

42

43

44

45

46

1  
2  
3  
4  
5  
6  
7  
8  
9  
10  
11  
12  
13  
14  
15  
16  
17  
18  
19  
20  
21  
22  
23  
24  
25  
26  
27  
28  
29  
30  
31  
32  
33  
34  
35  
36  
37  
38  
39  
40  
41  
42  
43  
44  
45  
46  
47  
48  
49  
50  
51  
52  
53  
54  
55  
56  
57  
58  
59  
60

**A**



**B**



1  
2  
3  
4  
5  
6  
7  
8  
9  
10  
11  
12  
13  
14  
15  
16  
17  
18  
19  
20  
21  
22  
23  
24  
25  
26  
27  
28  
29  
30  
31  
32  
33  
34  
35  
36  
37  
38  
39  
40  
41  
42  
43  
44  
45  
46  
47  
48  
49  
50  
51  
52  
53  
54  
55  
56  
57  
58  
59  
60

**A**

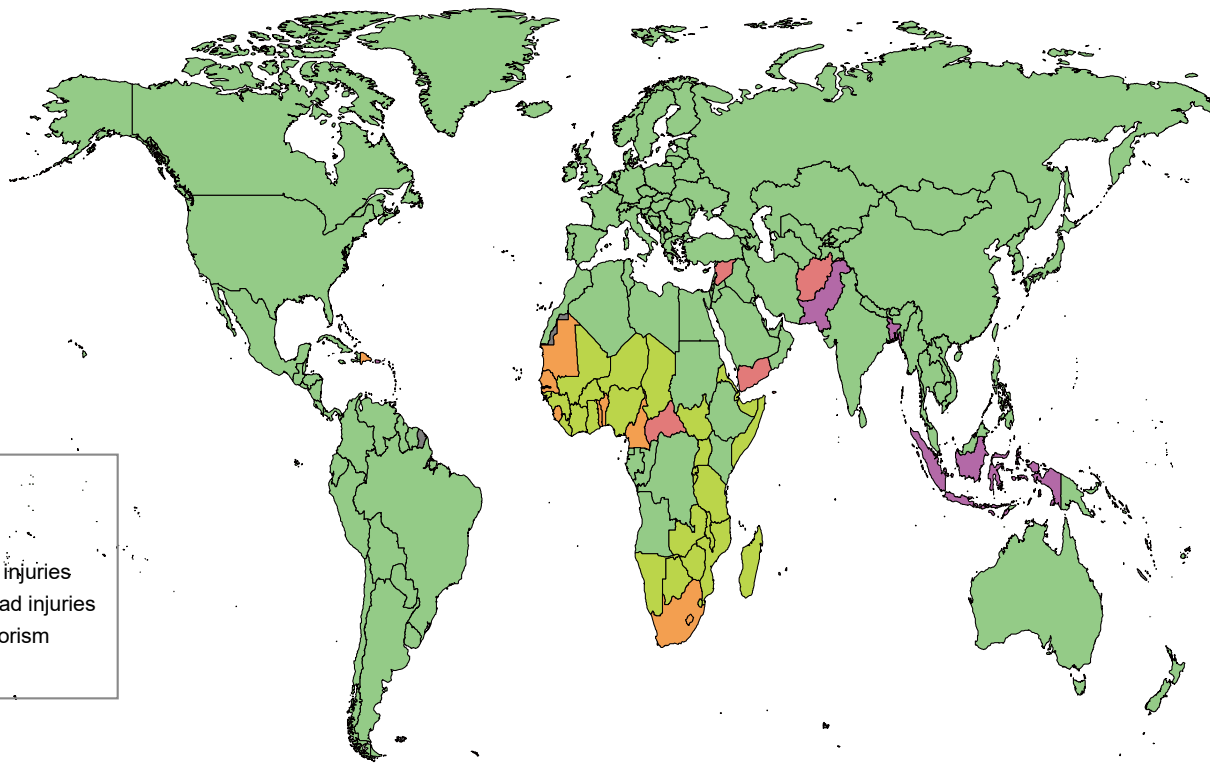

**B**

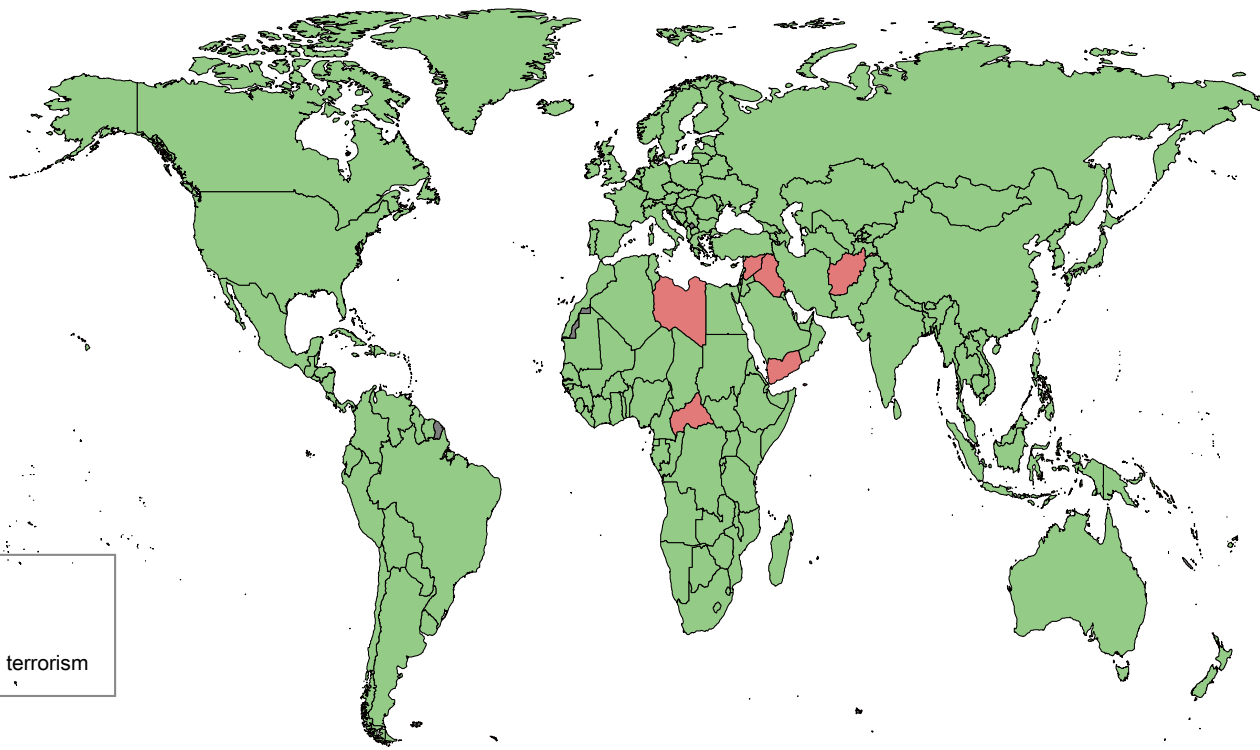

**A**

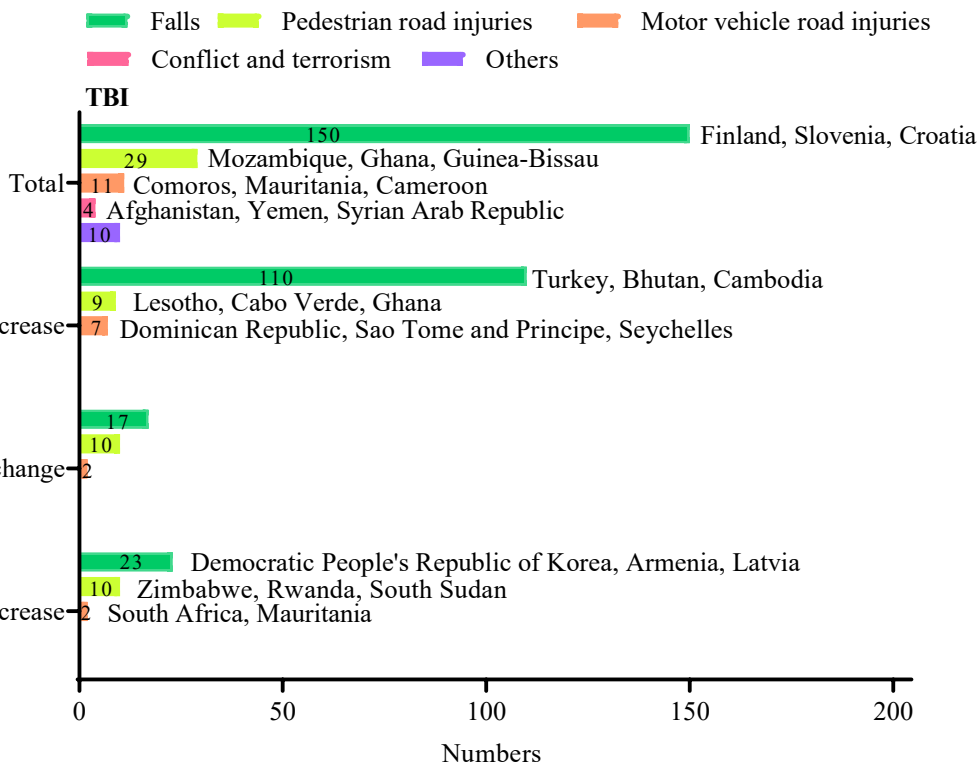

**B**

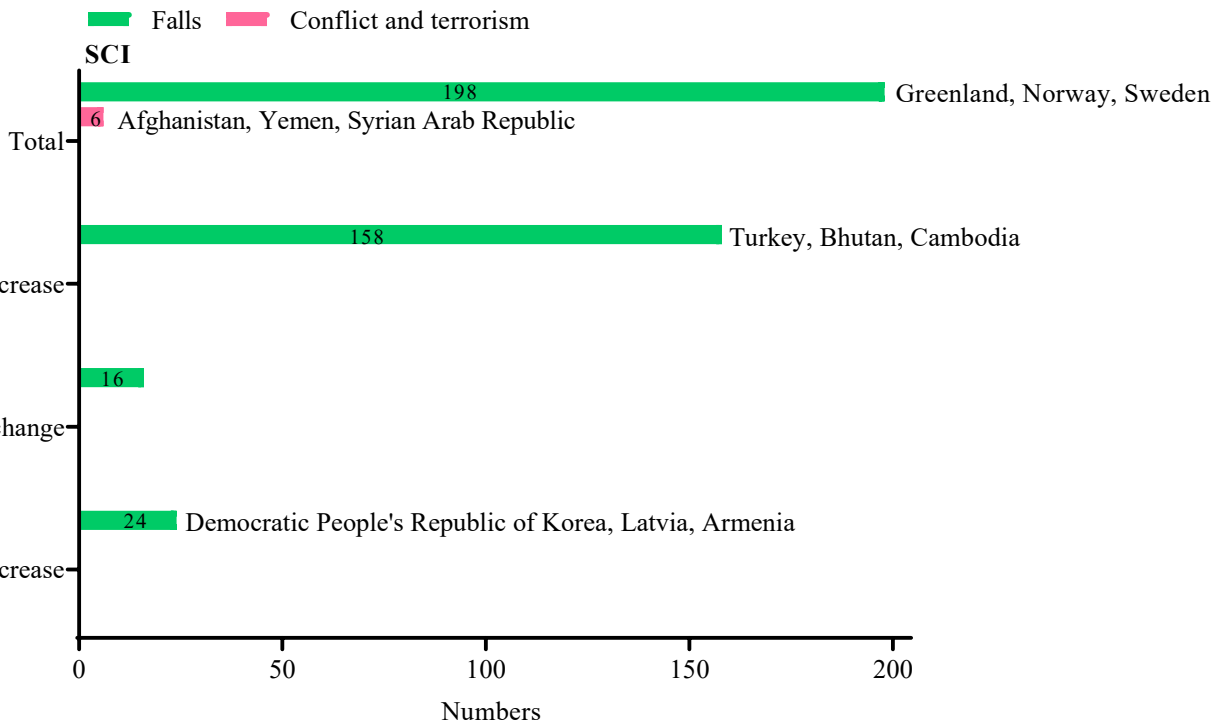

## eResults

### Global, Regional, and National Disease Burden

Regionally, Eastern Europe had the largest age-standardized incidence rates (737 [633 to 857] cases per 100,000 population), age-standardized prevalence estimates (1312 [1240 to 1393] cases per 100,000 population), and age-standardized YLD rates (193 [136 to 261] YLDs per 100,000 population) of TBI in 2019. High-income North America had the largest age-standardized incidence rates (23 [17 to 30] cases per 100,000 population), age-standardized prevalence estimates (438 [404 to 474] cases per 100,000 population), and age-standardized YLD rates (113 [80 to 146] YLDs per 100,000 population) of SCI in 2019.

Nationally, for TBI, Slovenia had the largest age-standardized incidence rates (885 [768 to 1036] cases per 100,000 population), age-standardized prevalence estimates (1521 [1448 to 1595] cases per 100,000 population), and age-standardized YLD rates (223 [157 to 303] YLDs per 100,000 population) in 2019. For SCI, Afghanistan had the largest age-standardized incidence rates (44 [12 to 132] cases per 100,000 population), and Syrian Arab Republic had the largest age-standardized prevalence estimates (1049 [333 to 2942] cases per 100,000 population) and age-standardized YLD rates (403 [113 to 1150] YLDs per 100,000 population) in 2019.

### Leading Causes by Country and Territory

By falls, the countries/territories with the top three largest increase in age-standardized incidence rates of TBI from 1990 to 2019 were Turkey (100.3% [88.8% to 114.5%]), Bhutan (96.7% [86.9% to 108.0%]), and Cambodia (73.5% [67.6% to 79.9%]), and the top three decreasing rates were in Democratic People's Republic of Korea (-38.1% [-40.2% to -35.8%]), Armenia (-35.1% [-41.2% to -28.4%]), and Latvia (-34.6% [-38.4% to -30.9%]) (out of 150 countries/territories). By pedestrian road injuries, the top three countries/territories by increasing rates were Lesotho (49.5% [38.4% to 59.9%]), Cabo Verde (28.1% [19.2% to 37.2%]), and Ghana (18.3% [11.2% to 26.6%]), and the top three countries/territories by decreasing rates were Zimbabwe (-32.5% [-38.5% to -26.4%]), Rwanda (-30.3% [-34.9% to -25.3%]), and South Sudan (-19.2% [-24.3% to -13.9%]) (out of 29 countries/territories). By motor vehicle road injuries, the countries/territories with the top three largest increase in rates were Dominican Republic (38.5% [24.0% to 54.6%]), Sao Tome and Principe (28.9% [20.0% to 38.6%]), and Seychelles (26.8% [15.3% to 39.3%]), and there were only two countries/territories had a significant decrease in their rates: South Africa (-26.0% [-30.5% to -21.3%]) and Mauritania (-11.2% [-17.4% to -4.2%]) (amongst the 11 included countries/territories).

Regarding change rates in falls (as a cause of SCI) from 1990 to 2019, the countries/territories with the largest increase in age-standardized incidence rates were Turkey (110.5% [97.3% to 125.4%]), Bhutan (101.1% [90.9% to 112.6%]), and Cambodia (76.5% [70.1% to 83.1%]), and the top largest declines were in Democratic People's Republic of Korea (-37.2% [-39.3% to -34.9%]), Latvia (-34.5% [-37.9% to -31.0%]), and Armenia (-33.9% [-39.3% to -27.9%]) (out of 198 countries/territories).

eFigure 1. Incidence of traumatic brain injury worldwide

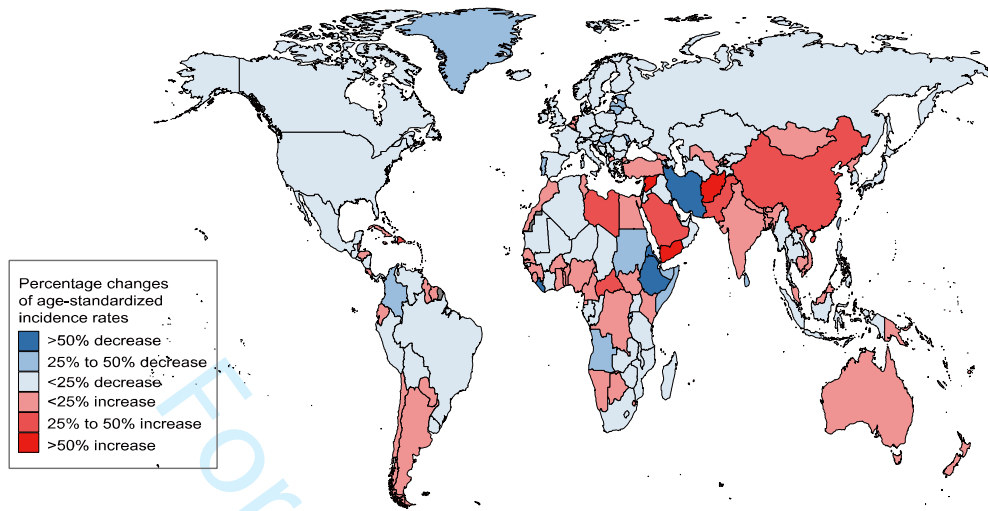

Percentage changes of age-standardized incidence rates of traumatic brain injury, 1990–2019

eFigure 2. Prevalence of traumatic brain injury worldwide

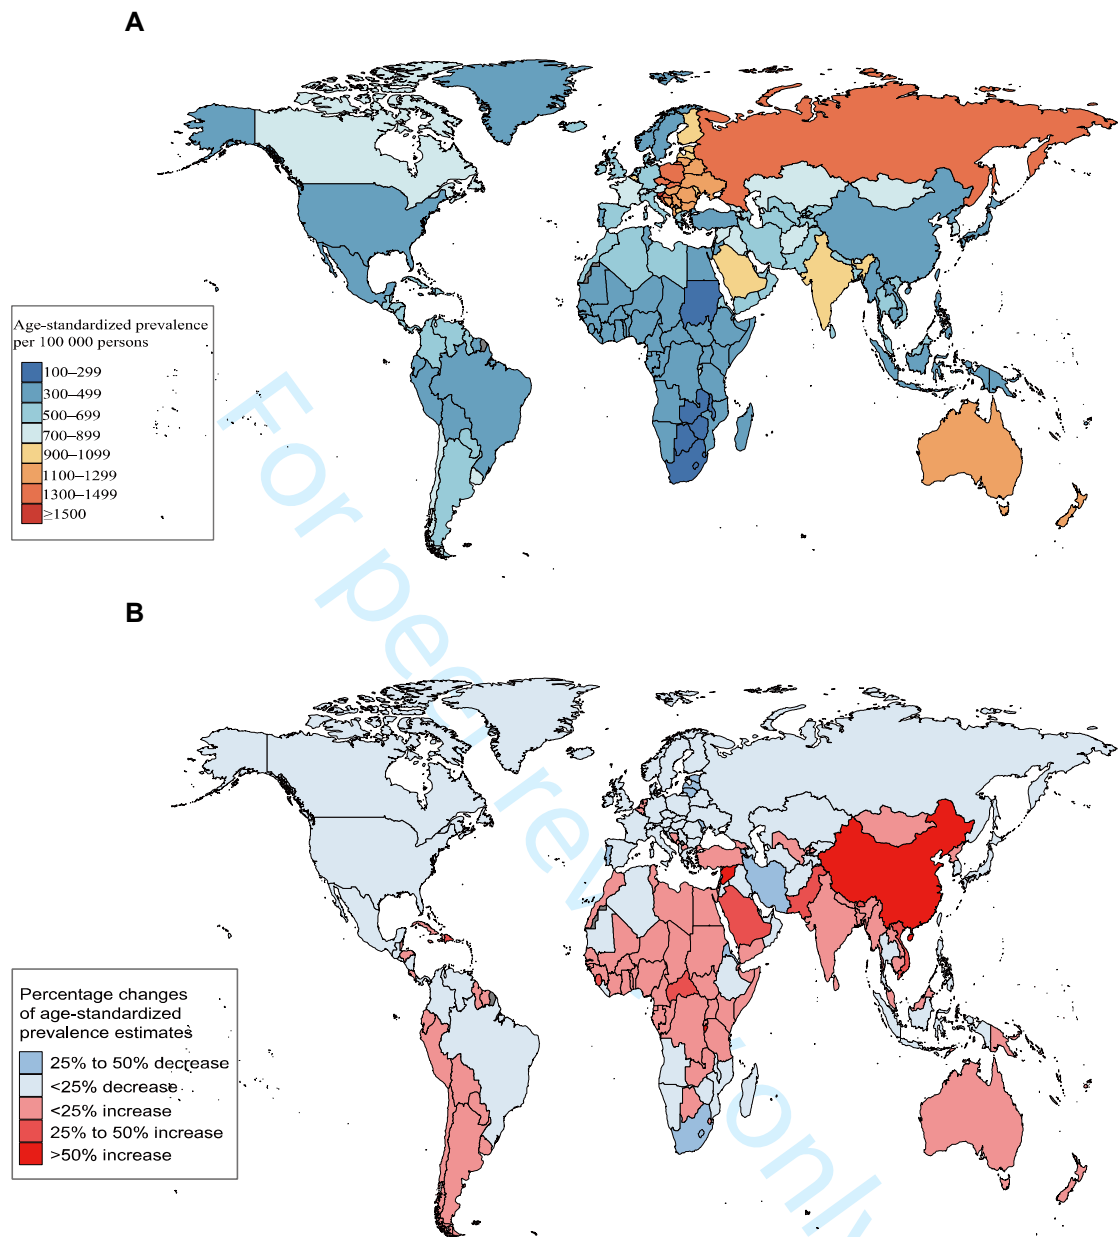

Age-standardized prevalence estimates per 100,000 persons of traumatic brain injury (TBI) by location, 2019 (A);

Percentage changes of age-standardized prevalence estimates of TBI, 1990–2019 (B)

eFigure 3. Years lived with disability of traumatic brain injury worldwide



Age-standardized years lived with disability (YLDs) rates per 100,000 persons of traumatic brain injury (TBI) by location, 2019 (A); Percentage changes of age-standardized YLD rates of TBI, 1990–2019 (B)



eFigure 4. Incidence of spinal cord injury worldwide



Percentage changes of age-standardized incidence rates of spinal cord injury, 1990–2019

eFigure 5. Prevalence of spinal cord injury worldwide



Age-standardized prevalence estimates per 100,000 persons of spinal cord injury (SCI) by location, 2019 (A);

Percentage changes of age-standardized prevalence estimates of SCI, 1990–2019 (B)

eFigure 6. Years lived with disability of spinal cord injury world

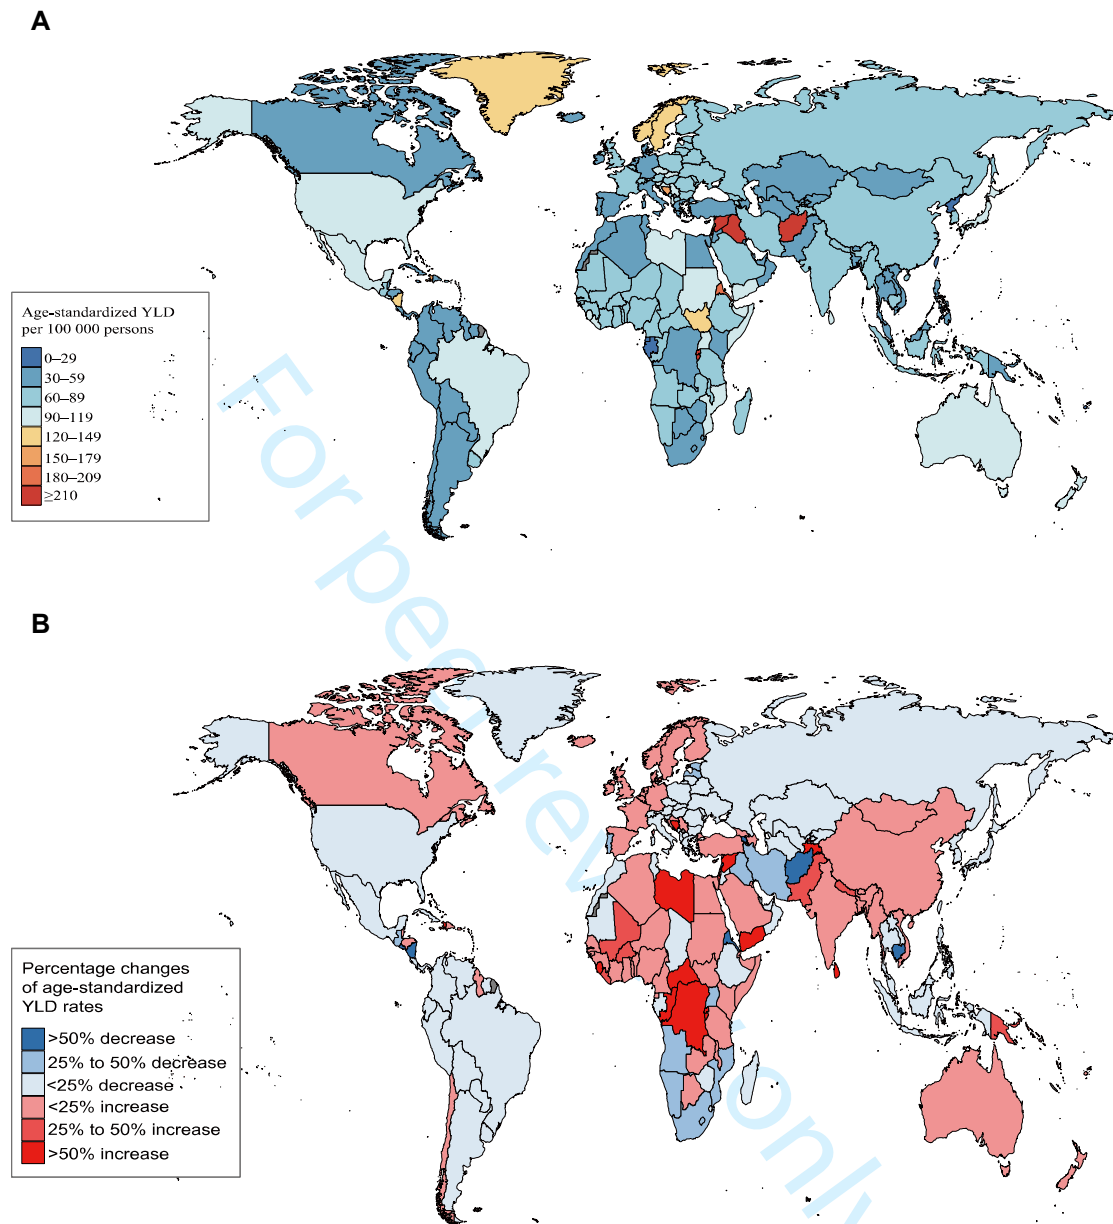

Age-standardized years lived with disability (YLDs) rates per 100,000 persons of spinal cord injury (SCI) by location, 2019 (A); Percentage changes of age-standardized YLD rates of SCI, 1990–2019 (B)

**eFigure 7. Associations between Socio-demographic Index (SDI) and age-standardized years lived with disability (YLDs) rates of traumatic brain injury and spinal cord injury in 204 countries and territories**



Associations between Socio-demographic Index (SDI) and age-standardized years lived with disability (YLDs) rates of traumatic brain injury (A) and spinal cord injury (B) in 204 countries and territories, 2019; each point is plotted for each country/territory and shows observed age-standardized YLD rates for that country/territory in 2019; expected values based on SDI and disease rates in all countries and territories are shown as the black line; the name of each country/territory is represented by its ISO3 codes; ISO3 codes of 204 countries and territories are presented in **eTable 7**

1 eTable 1. Global Burden of Disease detailed data sources for estimates of non-fatal injuries burden from 204 countries and territories

| 2  | Location            | Total number of data sources | Total number of metadata | Data source citation                                |
|----|---------------------|------------------------------|--------------------------|-----------------------------------------------------|
| 3  | Afghanistan         | 1                            | 7                        | Afghanistan Demographic and Health Survey 2015-2016 |
| 4  | Albania             | 2                            | 510                      | Albania Demographic and Health Survey 2008-2009     |
| 5  |                     |                              |                          | Albania Reproductive Health Survey 2002             |
| 6  | Algeria             | 0                            | 0                        |                                                     |
| 7  | American Samoa      | 0                            | 0                        |                                                     |
| 8  | Andorra             | 0                            | 0                        |                                                     |
| 9  | Angola              | 0                            | 0                        |                                                     |
| 10 | Antigua and Barbuda | 0                            | 0                        |                                                     |
| 11 | Argentina           | 0                            | 0                        |                                                     |
| 12 | Armenia             | 0                            | 0                        |                                                     |
| 13 | Australia           | 0                            | 0                        |                                                     |
| 14 | Austria             | 6                            | 240                      | Austria Hospital Inpatient Discharges 1989-1992     |
| 15 |                     |                              |                          | Austria Hospital Inpatient Discharges 1993-1997     |
| 16 |                     |                              |                          | Austria Hospital Inpatient Discharges 1998-2002     |
| 17 |                     |                              |                          | Austria Hospital Inpatient Discharges 2003-2007     |
| 18 |                     |                              |                          | Austria Hospital Inpatient Discharges 2008-2012     |
| 19 |                     |                              |                          | Austria Hospital Inpatient Discharges 2013-2014     |
| 20 | Azerbaijan          | 2                            | 10                       | Azerbaijan Demographic and Health Survey 2006       |
| 21 |                     |                              |                          | Azerbaijan Reproductive Health Survey 2001          |
| 22 | Bahamas             | 0                            | 0                        |                                                     |
| 23 | Bahrain             | 0                            | 0                        |                                                     |
| 24 | Bangladesh          | 3                            | 280                      | Bangladesh World Health Survey 2003                 |
| 25 |                     |                              |                          | Bangladesh Health and Injury Survey 2003            |
| 26 |                     |                              |                          | Bangladesh Demographic and Health Survey 2007       |
| 27 | Barbados            | 0                            | 0                        |                                                     |
| 28 | Belarus             | 0                            | 0                        |                                                     |
| 29 | Belgium             | 1                            | 2656                     | European Hospital Morbidity Database, 2008          |
| 30 | Belize              | 0                            | 0                        |                                                     |
| 31 | Benin               | 0                            | 0                        |                                                     |

42  
43  
44  
45  
46

|    |                                  |    |        |                                                                 |
|----|----------------------------------|----|--------|-----------------------------------------------------------------|
| 1  | Bermuda                          | 0  | 0      |                                                                 |
| 2  | Bhutan                           | 0  | 0      |                                                                 |
| 3  |                                  |    |        |                                                                 |
| 4  | Bolivia (Plurinational State of) | 1  | 15     | Bolivia Demographic and Health Survey 2008                      |
| 5  | Bosnia and Herzegovina           | 1  | 140    | Bosnia and Herzegovina World Health Survey 2003                 |
| 6  | Botswana                         | 2  | 514    | Botswana AIDS Impact Survey 2013                                |
| 7  |                                  |    |        |                                                                 |
| 8  |                                  |    |        | Botswana Health Management Data System 2008-2009                |
| 9  | Brazil                           | 6  | 173640 | Brazil World Health Survey 2003                                 |
| 10 |                                  |    |        |                                                                 |
| 11 |                                  |    |        | Brazil Hospital Information System 1997                         |
| 12 |                                  |    |        | Brazil Hospital Information System 1998-2002                    |
| 13 |                                  |    |        | Brazil Hospital Information System 2003-2007                    |
| 14 |                                  |    |        | Brazil Hospital Information System 2008-2012                    |
| 15 |                                  |    |        | Brazil Hospital Information System 2013-2014                    |
| 16 |                                  |    |        |                                                                 |
| 17 | Brunei Darussalam                | 0  | 0      |                                                                 |
| 18 | Bulgaria                         | 0  | 0      |                                                                 |
| 19 |                                  |    |        |                                                                 |
| 20 | Burkina Faso                     | 2  | 167    | Burkina Faso Demographic and Health Survey 2010-2011            |
| 21 |                                  |    |        |                                                                 |
| 22 |                                  |    |        | Burkina Faso World Health Survey 2002-2003                      |
| 23 | Burundi                          | 0  | 0      |                                                                 |
| 24 | Cabo Verde                       | 0  | 0      |                                                                 |
| 25 | Cambodia                         | 3  | 40     | Cambodia Demographic and Health Survey 2000                     |
| 26 |                                  |    |        |                                                                 |
| 27 |                                  |    |        | Cambodia Demographic and Health Survey 2005-2006                |
| 28 |                                  |    |        |                                                                 |
| 29 |                                  |    |        | Cambodia Demographic and Health Survey 2014                     |
| 30 | Cameroon                         | 1  | 14     | Cameroon Demographic and Health Survey 2004                     |
| 31 | Canada                           | 0  | 0      |                                                                 |
| 32 | Central African Republic         | 1  | 7      | Central African Republic Multiple Indicator Cluster Survey 2006 |
| 33 | Chad                             | 2  | 177    | Chad World Health Survey 2003                                   |
| 34 |                                  |    |        |                                                                 |
| 35 |                                  |    |        | Chad Demographic and Health Survey 2014-2015                    |
| 36 | Chile                            | 3  | 3984   | Chile Hospital Discharges 2001-2002                             |
| 37 |                                  |    |        |                                                                 |
| 38 |                                  |    |        | Chile Hospital Discharges 2003-2007                             |
| 39 |                                  |    |        | Chile Hospital Discharges 2008-2012                             |
| 40 | China                            | 15 | 62053  | China World Health Survey 2002                                  |
| 41 |                                  |    |        |                                                                 |
| 42 |                                  |    |        | China Health and Family Life Survey 1999-2000                   |

|    |               |   |      |                                                                       |
|----|---------------|---|------|-----------------------------------------------------------------------|
| 1  |               |   |      | China WHO Study on Global AGEing and Adult Health 2007-2010           |
| 2  |               |   |      | Hong Kong Injury Survey 2008                                          |
| 3  |               |   |      | China National Injury Surveillance System 2006 - China CDC            |
| 4  |               |   |      | China National Injury Surveillance System 2007 - China CDC            |
| 5  |               |   |      | China National Injury Surveillance System 2008 - China CDC            |
| 6  |               |   |      | China National Injury Surveillance System 2009 - China CDC            |
| 7  |               |   |      | China National Injury Surveillance System 2010 - China CDC            |
| 8  |               |   |      | China National Injury Surveillance System 2011 - China CDC            |
| 9  |               |   |      | China National Injury Surveillance System 2012 - China CDC            |
| 10 |               |   |      | China National Injury Surveillance System 2013 - China CDC            |
| 11 |               |   |      | China National Injury Surveillance System 2014 - China CDC            |
| 12 |               |   |      | China Injury Comprehensive Surveillance Study 2009-2011 - China CDC   |
| 13 |               |   |      | Prevalence of and Risk Factors for Intimate Partner Violence in China |
| 14 |               |   |      |                                                                       |
| 15 |               |   |      |                                                                       |
| 16 |               |   |      |                                                                       |
| 17 |               |   |      |                                                                       |
| 18 | Colombia      | 2 | 397  | Colombia National Health Survey 2007-2008                             |
| 19 |               |   |      | Colombia Demographic and Health Survey 2009-2010                      |
| 20 |               |   |      |                                                                       |
| 21 | Comoros       | 2 | 162  | Comoros World Health Survey 2003                                      |
| 22 |               |   |      | Comoros Demographic and Health Survey 2012-2013                       |
| 23 |               |   |      |                                                                       |
| 24 | Congo         | 1 | 135  | Congo World Health Survey 2003                                        |
| 25 | Cook Islands  | 0 | 0    |                                                                       |
| 26 | Costa Rica    | 0 | 0    |                                                                       |
| 27 |               |   |      |                                                                       |
| 28 | Croatia       | 2 | 5467 | European Hospital Morbidity Database, 2008                            |
| 29 |               |   |      | Croatia World Health Survey 2003                                      |
| 30 | Cuba          | 0 | 0    |                                                                       |
| 31 |               |   |      |                                                                       |
| 32 | Cyprus        | 2 | 336  | European Hospital Morbidity Database, 2008                            |
| 33 |               |   |      | Cyprus European Health Interview Survey 2008                          |
| 34 | Czechia       | 3 | 1492 | European Hospital Morbidity Database, 2008                            |
| 35 |               |   |      | Czech Republic World Health Survey 2002-2003                          |
| 36 |               |   |      | Czech Republic European Health Interview Survey 2008                  |
| 37 |               |   |      |                                                                       |
| 38 | Côte d'Ivoire | 2 | 167  | Côte d'Ivoire World Health Survey 2003                                |
| 39 |               |   |      | Côte d'Ivoire Demographic and Health Survey 2011-2012                 |
| 40 |               |   |      |                                                                       |
| 41 |               |   |      |                                                                       |
| 42 |               |   |      |                                                                       |
| 43 |               |   |      |                                                                       |
| 44 |               |   |      |                                                                       |
| 45 |               |   |      |                                                                       |
| 46 |               |   |      |                                                                       |

|    |                                       |   |     |                                                                                                                      |
|----|---------------------------------------|---|-----|----------------------------------------------------------------------------------------------------------------------|
| 1  | Democratic People's Republic of Korea | 0 | 0   |                                                                                                                      |
| 2  |                                       |   |     |                                                                                                                      |
| 3  | Democratic Republic of the Congo      | 1 | 7   | Democratic Republic of the Congo Demographic and Health Survey 2013-2014                                             |
| 4  |                                       |   |     |                                                                                                                      |
| 5  | Denmark                               | 1 | 160 | European Hospital Morbidity Database, 2008                                                                           |
| 6  | Djibouti                              | 0 | 0   |                                                                                                                      |
| 7  | Dominica                              | 0 | 0   |                                                                                                                      |
| 8  | Dominican Republic                    | 4 | 191 | Dominican Republic Demographic and Health Survey 2002                                                                |
| 9  |                                       |   |     | Dominican Republic Demographic and Health Survey 2007                                                                |
| 10 |                                       |   |     | Dominican Republic World Health Survey 2003                                                                          |
| 11 |                                       |   |     | Dominican Republic Demographic and Health Survey 2013                                                                |
| 12 | Ecuador                               | 8 | 380 | Ecuador World Health Survey 2003                                                                                     |
| 13 |                                       |   |     | Ecuador Reproductive Health Survey 1999                                                                              |
| 14 |                                       |   |     | Ecuador Reproductive Health Survey 2004                                                                              |
| 15 |                                       |   |     | Ecuador Hospital Inpatient Discharges 1993-1997                                                                      |
| 16 |                                       |   |     | Ecuador Hospital Inpatient Discharges 1998-2002                                                                      |
| 17 |                                       |   |     | Ecuador Hospital Inpatient Discharges 2003-2007                                                                      |
| 18 |                                       |   |     | Ecuador Hospital Inpatient Discharges 2008-2012                                                                      |
| 19 |                                       |   |     | Ecuador Hospital Inpatient Discharges 2013-2014                                                                      |
| 20 | Egypt                                 | 2 | 14  | Egypt Demographic and Health Survey 2005                                                                             |
| 21 |                                       |   |     | Egypt Demographic and Health Survey 2014                                                                             |
| 22 | El Salvador                           | 2 | 14  | El Salvador Reproductive Health Survey 2002-2003                                                                     |
| 23 |                                       |   |     | El Salvador Reproductive Health Survey 2008                                                                          |
| 24 | Equatorial Guinea                     | 0 | 0   |                                                                                                                      |
| 25 | Eritrea                               | 0 | 0   |                                                                                                                      |
| 26 | Estonia                               | 2 | 151 | Estonia World Health Survey 2003                                                                                     |
| 27 |                                       |   |     | Intimate partner violence and sexual health outcomes: a population-based study among 16-44-year-old women in Estonia |
| 28 | Eswatini                              | 1 | 165 | Swaziland World Health Survey 2003                                                                                   |
| 29 | Ethiopia                              | 3 | 252 | Ethiopia World Health Survey 2003                                                                                    |
| 30 |                                       |   |     | Ethiopia Demographic and Health Survey 2016                                                                          |
| 31 |                                       |   |     |                                                                                                                      |
| 32 |                                       |   |     |                                                                                                                      |
| 33 |                                       |   |     |                                                                                                                      |
| 34 |                                       |   |     |                                                                                                                      |
| 35 |                                       |   |     |                                                                                                                      |
| 36 |                                       |   |     |                                                                                                                      |
| 37 |                                       |   |     |                                                                                                                      |
| 38 |                                       |   |     |                                                                                                                      |
| 39 |                                       |   |     |                                                                                                                      |
| 40 |                                       |   |     |                                                                                                                      |
| 41 |                                       |   |     |                                                                                                                      |
| 42 |                                       |   |     |                                                                                                                      |



|    |               |   |      |                                                                 |
|----|---------------|---|------|-----------------------------------------------------------------|
| 1  |               |   |      | Ethiopia STEPS Noncommunicable Disease Risk Factors Survey 2015 |
| 2  | Fiji          | 0 | 0    |                                                                 |
| 3  |               |   |      |                                                                 |
| 4  | Finland       | 1 | 3984 | European Hospital Morbidity Database, 2008                      |
| 5  | France        | 0 | 0    |                                                                 |
| 6  | Gabon         | 1 | 7    | Gabon Demographic and Health Survey 2012                        |
| 7  |               |   |      |                                                                 |
| 8  | Gambia        | 1 | 7    | Gambia Demographic and Health Survey 2013                       |
| 9  | Georgia       | 6 | 2755 | Georgia World Health Survey 2003                                |
| 10 |               |   |      | Georgia Reproductive Health Survey 1999-2000                    |
| 11 |               |   |      | Georgia Reproductive Health Survey 2005                         |
| 12 |               |   |      | Georgia Reproductive Health Survey 2010-2011                    |
| 13 |               |   |      | Georgia Hospital Data 2013-2017                                 |
| 14 |               |   |      | Georgia Hospital Discharges 2016-2017                           |
| 15 |               |   |      |                                                                 |
| 16 |               |   |      |                                                                 |
| 17 | Germany       | 1 | 40   | Germany Hospital Discharges by Diagnosis 2009                   |
| 18 | Ghana         | 3 | 415  | Ghana World Health Survey 2003                                  |
| 19 |               |   |      | Ghana WHO Study on Global AGEing and Adult Health 2007-2008     |
| 20 |               |   |      | Ghana Demographic and Health Survey 2008                        |
| 21 |               |   |      |                                                                 |
| 22 | Greece        | 0 | 0    |                                                                 |
| 23 |               |   |      |                                                                 |
| 24 | Greenland     | 0 | 0    |                                                                 |
| 25 | Grenada       | 0 | 0    |                                                                 |
| 26 | Guam          | 3 | 54   | United States Behavioral Risk Factor Surveillance System 2003   |
| 27 |               |   |      | United States Behavioral Risk Factor Surveillance System 2008   |
| 28 |               |   |      | United States Behavioral Risk Factor Surveillance System 2012   |
| 29 |               |   |      |                                                                 |
| 30 | Guatemala     | 3 | 188  | Guatemala World Health Survey 2003                              |
| 31 |               |   |      | Guatemala Reproductive Health Survey 2002                       |
| 32 |               |   |      | Guatemala Demographic and Health Survey 2014-2015               |
| 33 |               |   |      |                                                                 |
| 34 | Guinea        | 1 | 7    | Guinea Demographic and Health Survey 2005                       |
| 35 |               |   |      |                                                                 |
| 36 | Guinea-Bissau | 0 | 0    |                                                                 |
| 37 | Guyana        | 0 | 0    |                                                                 |
| 38 | Haiti         | 3 | 21   | Haiti Demographic and Health Survey 2000                        |
| 39 |               |   |      | Haiti Demographic and Health Survey 2005-2006                   |
| 40 |               |   |      | Haiti Demographic and Health Survey 2012                        |
| 41 |               |   |      |                                                                 |
| 42 |               |   |      |                                                                 |

|    |                            |    |       |                                                                                                                            |
|----|----------------------------|----|-------|----------------------------------------------------------------------------------------------------------------------------|
| 1  | Honduras                   | 3  | 21    | Honduras Demographic and Health Survey 2005-2006                                                                           |
| 2  |                            |    |       | Honduras Reproductive Health Survey 2001                                                                                   |
| 3  |                            |    |       | Honduras Demographic and Health Survey 2011-2012                                                                           |
| 4  |                            |    |       |                                                                                                                            |
| 5  | Hungary                    | 2  | 190   | Hungary World Health Survey 2003                                                                                           |
| 6  |                            |    |       | Hungary European Health Interview Survey 2009 - Eurostat                                                                   |
| 7  |                            |    |       |                                                                                                                            |
| 8  | Iceland                    | 1  | 160   | European Hospital Morbidity Database, 2008                                                                                 |
| 9  | India                      | 16 | 5756  | India Demographic and Health Survey 2005-2006                                                                              |
| 10 |                            |    |       | India World Health Survey 2003                                                                                             |
| 11 |                            |    |       | India WHO Study on Global Ageing and Adult Health 2007                                                                     |
| 12 |                            |    |       | Road use pattern and risk factors for non-fatal road traffic injuries among children in urban India                        |
| 13 |                            |    |       | India Demographic and Health Survey 2015-2016                                                                              |
| 14 |                            |    |       | Burden, distribution and impact of domestic accidents in a semi-urban area of coastal Tamil Nadu, India                    |
| 15 |                            |    |       | Characteristics of non-fatal fall injuries in rural India                                                                  |
| 16 |                            |    |       | India - Shillong Nazareth Hospital Inpatient Discharges 2014                                                               |
| 17 |                            |    |       | Incidence and burden of road traffic injuries in urban India [Unpublished data]                                            |
| 18 |                            |    |       | A population-based study on road traffic injuries in Pune City, India [Unpublished data]                                   |
| 19 |                            |    |       | India Hospital Inpatient Data 2014-2017                                                                                    |
| 20 |                            |    |       | Epidemiology of injury in rural Pondicherry, India                                                                         |
| 21 |                            |    |       | Unintentional Childhood Injuries in Urban and Rural Ujjain, India: A Community-Based Survey                                |
| 22 |                            |    |       | A study of falls among elderly persons in a rural area of Haryana                                                          |
| 23 |                            |    |       | The characteristics of, and risk factors for, child injuries in Andhra Pradesh, India: the Young Lives project             |
| 24 |                            |    |       | Epidemiology of childhood injuries in rural Puducherry, South India                                                        |
| 25 | Indonesia                  | 1  | 14368 | Indonesia Integrated Hospital Data 2013                                                                                    |
| 26 | Iran (Islamic Republic of) | 6  | 333   | Iran Demographic and Health Survey 2000                                                                                    |
| 27 |                            |    |       | Incidence and characteristics of falls leading to hip fracture in Iranian population                                       |
| 28 |                            |    |       | Iran Hospital Data 2001-2010                                                                                               |
| 29 |                            |    |       | Epidemiology and mortality of burns in the South West of Iran                                                              |
| 30 |                            |    |       | Injury incidence, healthcare consumption and avenues for prevention: a household survey on injury in rural Twiserkan, Iran |
| 31 |                            |    |       |                                                                                                                            |
| 32 |                            |    |       |                                                                                                                            |
| 33 |                            |    |       |                                                                                                                            |
| 34 |                            |    |       |                                                                                                                            |
| 35 |                            |    |       |                                                                                                                            |
| 36 |                            |    |       |                                                                                                                            |
| 37 |                            |    |       |                                                                                                                            |
| 38 |                            |    |       |                                                                                                                            |
| 39 |                            |    |       |                                                                                                                            |
| 40 |                            |    |       |                                                                                                                            |
| 41 |                            |    |       |                                                                                                                            |
| 42 |                            |    |       |                                                                                                                            |

|    |                         |   |       |                                                                         |
|----|-------------------------|---|-------|-------------------------------------------------------------------------|
| 1  |                         |   |       | Population based estimates of non-fatal injuries in the capital of Iran |
| 2  | Iraq                    | 0 | 0     |                                                                         |
| 3  |                         |   |       |                                                                         |
| 4  | Ireland                 | 0 | 0     |                                                                         |
| 5  | Israel                  | 0 | 0     |                                                                         |
| 6  | Italy                   | 3 | 83664 | Italy Hospital Inpatient Discharges 2005-2007                           |
| 7  |                         |   |       | Italy Hospital Inpatient Discharges 2008-2012                           |
| 8  |                         |   |       | Italy Hospital Inpatient Discharges 2013-2016                           |
| 9  |                         |   |       |                                                                         |
| 10 | Jamaica                 | 0 | 0     |                                                                         |
| 11 |                         |   |       |                                                                         |
| 12 | Japan                   | 2 | 7708  | Japan Diagnosis Procedure Combination Database 2010-2012                |
| 13 |                         |   |       | Japan Diagnosis Procedure Combination Database 2013-2015                |
| 14 | Jordan                  | 3 | 137   | Jordan Al-Bashir Hospital Discharges 2016                               |
| 15 |                         |   |       | Jordan Demographic and Health Survey 2007                               |
| 16 |                         |   |       | Jordan Demographic and Health Survey 2012                               |
| 17 |                         |   |       |                                                                         |
| 18 | Kazakhstan              | 2 | 147   | Kazakhstan World Health Survey 2002-2003                                |
| 19 |                         |   |       | Kazakhstan Multiple Indicator Cluster Survey 2010-2011                  |
| 20 |                         |   |       |                                                                         |
| 21 | Kenya                   | 7 | 1545  | Kenya Demographic and Health Survey 2003                                |
| 22 |                         |   |       | Kenya Demographic and Health Survey 2008-2009                           |
| 23 |                         |   |       | Kenya World Health Survey 2004                                          |
| 24 |                         |   |       | Kenya Violence Against Children Study 2010                              |
| 25 |                         |   |       | Kenya National Inpatient Morbidity and Mortality Statistics 1999        |
| 26 |                         |   |       | Kenya Demographic and Health Survey 2014                                |
| 27 |                         |   |       | Kenya STEPS Noncommunicable Disease Risk Factors Survey 2015            |
| 28 |                         |   |       |                                                                         |
| 29 |                         |   |       |                                                                         |
| 30 | Kiribati                | 1 | 1     | Kiribati Family Health and Support Study 2008                           |
| 31 |                         |   |       |                                                                         |
| 32 | Kuwait                  | 0 | 0     |                                                                         |
| 33 | Kyrgyzstan              | 1 | 6     | Kyrgyzstan Demographic and Health Survey 2012                           |
| 34 |                         |   |       |                                                                         |
| 35 | Lao People's Democratic | 1 | 165   | Laos World Health Survey 2003                                           |
| 36 | Republic                |   |       |                                                                         |
| 37 | Latvia                  | 3 | 500   | European Hospital Morbidity Database, 2008                              |
| 38 |                         |   |       | Latvia World Health Survey 2003                                         |
| 39 |                         |   |       | Latvia European Health Interview Survey 2008 - Eurostat                 |
| 40 |                         |   |       |                                                                         |
| 41 | Lebanon                 | 0 | 0     |                                                                         |
| 42 |                         |   |       |                                                                         |

|    |                              |   |        |                                                              |
|----|------------------------------|---|--------|--------------------------------------------------------------|
| 1  | Lesotho                      | 0 | 0      |                                                              |
| 2  | Liberia                      | 1 | 7      | Liberia Demographic and Health Survey 2006-2007              |
| 3  |                              |   |        |                                                              |
| 4  | Libya                        | 0 | 0      |                                                              |
| 5  | Lithuania                    | 1 | 480    | European Hospital Morbidity Database, 2008                   |
| 6  | Luxembourg                   | 1 | 480    | European Hospital Morbidity Database, 2008                   |
| 7  |                              |   |        |                                                              |
| 8  | Madagascar                   | 0 | 0      |                                                              |
| 9  | Malawi                       | 4 | 171    | Malawi Demographic and Health Survey 2004-2005               |
| 10 |                              |   |        | Malawi Demographic and Health Survey 2010                    |
| 11 |                              |   |        | Malawi World Health Survey 2003                              |
| 12 |                              |   |        |                                                              |
| 13 |                              |   |        | Malawi Demographic and Health Survey 2015-2016               |
| 14 | Malaysia                     | 1 | 160    | Malaysia World Health Survey 2003                            |
| 15 |                              |   |        |                                                              |
| 16 | Maldives                     | 0 | 0      |                                                              |
| 17 | Mali                         | 2 | 177    | Mali World Health Survey 2003                                |
| 18 |                              |   |        | Mali Demographic and Health Survey 2012-2013                 |
| 19 |                              |   |        |                                                              |
| 20 | Malta                        | 1 | 1488   | European Hospital Morbidity Database, 2008                   |
| 21 | Marshall Islands             | 0 | 0      |                                                              |
| 22 | Mauritania                   | 1 | 155    | Mauritania World Health Survey 2003                          |
| 23 |                              |   |        |                                                              |
| 24 | Mauritius                    | 1 | 155    | Mauritius World Health Survey 2003                           |
| 25 | Mexico                       | 7 | 132660 | Mexico National Health Survey 1999-2000                      |
| 26 |                              |   |        | Mexico National Addiction Survey 2008                        |
| 27 |                              |   |        | Mexico National Addiction Survey 2011                        |
| 28 |                              |   |        |                                                              |
| 29 |                              |   |        | Mexico WHO Study on Global AGEing and Adult Health 2009-2010 |
| 30 |                              |   |        | Mexico Ministry of Health Hospital Discharges 2000-2002      |
| 31 |                              |   |        | Mexico Ministry of Health Hospital Discharges 2003-2007      |
| 32 |                              |   |        | Mexico Ministry of Health Hospital Discharges 2008-2012      |
| 33 |                              |   |        |                                                              |
| 34 | Micronesia (Federated States |   |        |                                                              |
| 35 | of)                          | 0 | 0      |                                                              |
| 36 |                              |   |        |                                                              |
| 37 | Monaco                       | 0 | 0      |                                                              |
| 38 | Mongolia                     | 0 | 0      |                                                              |
| 39 |                              |   |        |                                                              |
| 40 | Montenegro                   | 0 | 0      |                                                              |
| 41 | Morocco                      | 1 | 170    | Morocco World Health Survey 2003                             |
| 42 |                              |   |        |                                                              |

|    |             |    |       |                                                                        |
|----|-------------|----|-------|------------------------------------------------------------------------|
| 1  | Mozambique  | 2  | 593   | Mozambique Demographic and Health Survey 2003-2004                     |
| 2  |             |    |       | Mozambique Demographic and Health Survey 2011                          |
| 3  |             |    |       |                                                                        |
| 4  | Myanmar     | 2  | 162   | Myanmar World Health Survey 2003                                       |
| 5  |             |    |       | Myanmar Demographic and Health Survey 2015-2016                        |
| 6  | Namibia     | 2  | 174   | Namibia World Health Survey 2003                                       |
| 7  |             |    |       |                                                                        |
| 8  |             |    |       | Namibia Demographic and Health Survey 2013                             |
| 9  | Nauru       | 0  | 0     |                                                                        |
| 10 | Nepal       | 5  | 1416  | Nepal World Health Survey 2003                                         |
| 11 |             |    |       |                                                                        |
| 12 |             |    |       | Nepal Hospital Inpatient Discharges 2010-2012                          |
| 13 |             |    |       | Nepal Hospital Inpatient Discharges 2013-2014                          |
| 14 |             |    |       | Nepal Demographic and Health Survey 2011                               |
| 15 |             |    |       |                                                                        |
| 16 |             |    |       | Women's Status and Violence against Young Married Women in Rural Nepal |
| 17 | Netherlands | 15 | 11332 | Netherlands Injury Surveillance System 1998                            |
| 18 |             |    |       | Netherlands Injury Surveillance System 1999                            |
| 19 |             |    |       | Netherlands Injury Surveillance System 2000                            |
| 20 |             |    |       | Netherlands Injury Surveillance System 2001                            |
| 21 |             |    |       | Netherlands Injury Surveillance System 2002                            |
| 22 |             |    |       | Netherlands Injury Surveillance System 2003                            |
| 23 |             |    |       | Netherlands Injury Surveillance System 2004                            |
| 24 |             |    |       | Netherlands Injury Surveillance System 2005                            |
| 25 |             |    |       | Netherlands Injury Surveillance System 2006                            |
| 26 |             |    |       | Netherlands Injury Surveillance System 2007                            |
| 27 |             |    |       | Netherlands Injury Surveillance System 2008                            |
| 28 |             |    |       | Netherlands Injury Surveillance System 2009                            |
| 29 |             |    |       | Netherlands Injury Surveillance System 2010                            |
| 30 |             |    |       | Netherlands Injury Surveillance System 2011                            |
| 31 |             |    |       | Netherlands Injury Surveillance System 2012                            |
| 32 |             |    |       |                                                                        |
| 33 |             |    |       |                                                                        |
| 34 |             |    |       |                                                                        |
| 35 |             |    |       |                                                                        |
| 36 |             |    |       |                                                                        |
| 37 | New Zealand | 15 | 19406 | New Zealand National Minimum Dataset 2000-2002                         |
| 38 |             |    |       | New Zealand National Minimum Dataset 2003-2007                         |
| 39 |             |    |       |                                                                        |
| 40 |             |    |       | New Zealand National Minimum Dataset 2008-2012                         |
| 41 |             |    |       |                                                                        |
| 42 |             |    |       | New Zealand National Minimum Dataset 2013-2014                         |

|    |                          |   |      |                                                                                         |
|----|--------------------------|---|------|-----------------------------------------------------------------------------------------|
| 1  |                          |   |      | New Zealand Accident Compensation Corporation Injury Claims 2015                        |
| 2  |                          |   |      | New Zealand Accident Compensation Corporation Injury Claims 2016                        |
| 3  |                          |   |      | New Zealand Accident Compensation Corporation Injury Claims 2017                        |
| 4  |                          |   |      | New Zealand Accident Compensation Corporation Injury Claims 2014                        |
| 5  |                          |   |      | New Zealand Accident Compensation Corporation Injury Claims 2013                        |
| 6  |                          |   |      | New Zealand Accident Compensation Corporation Injury Claims 2012                        |
| 7  |                          |   |      | New Zealand Accident Compensation Corporation Injury Claims 2011                        |
| 8  |                          |   |      | New Zealand Accident Compensation Corporation Injury Claims 2010                        |
| 9  |                          |   |      | New Zealand Accident Compensation Corporation Injury Claims 2009                        |
| 10 |                          |   |      | New Zealand Accident Compensation Corporation Injury Claims 2008                        |
| 11 |                          |   |      | New Zealand National Minimum Dataset 2016-2017                                          |
| 12 |                          |   |      |                                                                                         |
| 13 | Nicaragua                | 2 | 14   | Nicaragua Reproductive Health Survey 2006-2007                                          |
| 14 |                          |   |      | Nicaragua Demographic and Health Survey 1997-1998                                       |
| 15 |                          |   |      |                                                                                         |
| 16 | Niger                    | 0 | 0    |                                                                                         |
| 17 |                          |   |      |                                                                                         |
| 18 | Nigeria                  | 3 | 520  | The burden of road traffic injuries in Nigeria: results of a population-based survey    |
| 19 |                          |   |      | Nigeria Demographic and Health Survey 2008                                              |
| 20 |                          |   |      | Nigeria Demographic and Health Survey 2013                                              |
| 21 |                          |   |      |                                                                                         |
| 22 | Niue                     | 0 | 0    |                                                                                         |
| 23 |                          |   |      |                                                                                         |
| 24 | North Macedonia          | 0 | 0    |                                                                                         |
| 25 |                          |   |      |                                                                                         |
| 26 | Northern Mariana Islands | 0 | 0    |                                                                                         |
| 27 |                          |   |      |                                                                                         |
| 28 | Norway                   | 1 | 1128 | Norway Patient Register 2008-2012                                                       |
| 29 |                          |   |      |                                                                                         |
| 30 | Oman                     | 0 | 0    |                                                                                         |
| 31 |                          |   |      |                                                                                         |
| 32 | Pakistan                 | 2 | 173  | Pakistan World Health Survey 2003-2004                                                  |
| 33 |                          |   |      | Burden of fall injuries in Pakistan--analysis of the National Injury Survey of Pakistan |
| 34 |                          |   |      |                                                                                         |
| 35 | Palau                    | 0 | 0    |                                                                                         |
| 36 |                          |   |      |                                                                                         |
| 37 | Palestine                | 0 | 0    |                                                                                         |
| 38 |                          |   |      |                                                                                         |
| 39 | Panama                   | 0 | 0    |                                                                                         |
| 40 |                          |   |      |                                                                                         |
| 41 | Papua New Guinea         | 0 | 0    |                                                                                         |
| 42 |                          |   |      |                                                                                         |
| 43 | Paraguay                 | 3 | 162  | Paraguay Reproductive Health Survey 2004                                                |
| 44 |                          |   |      | Paraguay World Health Survey 2002-2003                                                  |
| 45 |                          |   |      | Paraguay Reproductive Health Survey 2008                                                |
| 46 |                          |   |      |                                                                                         |

|    |                     |   |       |                                                                                                |
|----|---------------------|---|-------|------------------------------------------------------------------------------------------------|
| 1  | Peru                | 1 | 7     | Peru Continuous Demographic and Health Survey 2014 - INEI                                      |
| 2  | Philippines         | 4 | 2495  | Philippines World Health Survey 2003                                                           |
| 3  |                     |   |       | Philippine Health Insurance Corporation Claims 2013-2016                                       |
| 4  |                     |   |       | Philippines Demographic and Health Survey 2008                                                 |
| 5  |                     |   |       | Philippines Demographic and Health Survey 2013                                                 |
| 6  |                     |   |       | Philippines Demographic and Health Survey 2013                                                 |
| 7  |                     |   |       | Philippines Demographic and Health Survey 2013                                                 |
| 8  | Poland              | 4 | 47840 | European Hospital Morbidity Database, 2008                                                     |
| 9  |                     |   |       | Poland National Health Fund Patient Claims 2015                                                |
| 10 |                     |   |       | Poland National Health Fund Patient Claims 2016                                                |
| 11 |                     |   |       | Poland National Health Fund Patient Claims 2017                                                |
| 12 |                     |   |       | Poland National Health Fund Patient Claims 2017                                                |
| 13 | Portugal            | 1 | 1166  | Portugal Hospital Inpatient Discharges 2015                                                    |
| 14 | Puerto Rico         | 6 | 131   | United States Behavioral Risk Factor Surveillance System 2003                                  |
| 15 |                     |   |       | United States Behavioral Risk Factor Surveillance System 2005                                  |
| 16 |                     |   |       | United States Behavioral Risk Factor Surveillance System 2005                                  |
| 17 |                     |   |       | United States Behavioral Risk Factor Surveillance System 2006                                  |
| 18 |                     |   |       | United States Behavioral Risk Factor Surveillance System 2007                                  |
| 19 |                     |   |       | United States Behavioral Risk Factor Surveillance System 2007                                  |
| 20 |                     |   |       | United States Behavioral Risk Factor Surveillance System 2008                                  |
| 21 |                     |   |       | United States Behavioral Risk Factor Surveillance System 2012                                  |
| 22 |                     |   |       | United States Behavioral Risk Factor Surveillance System 2012                                  |
| 23 | Qatar               | 3 | 96    | Qatar - Annual Inpatients Discharge Abstract: Hamad General Hospital 2002                      |
| 24 |                     |   |       | Qatar - Annual Inpatients Discharge Abstract: Hamad General Hospital and Women's Hospital 2003 |
| 25 |                     |   |       | Qatar STEPS Noncommunicable Disease Risk Factors Survey 2012                                   |
| 26 | Republic of Korea   | 0 | 0     |                                                                                                |
| 27 |                     |   |       |                                                                                                |
| 28 | Republic of Moldova | 1 | 7     | Moldova Demographic and Health Survey 2005                                                     |
| 29 | Romania             | 4 | 199   | European Hospital Morbidity Database, 2008                                                     |
| 30 |                     |   |       | Romania Reproductive Health Survey 1999                                                        |
| 31 |                     |   |       | Romania Reproductive Health Survey 1999                                                        |
| 32 |                     |   |       | Romania Reproductive Health Survey 2004                                                        |
| 33 |                     |   |       | Romania Reproductive Health Survey 2004                                                        |
| 34 |                     |   |       | Romania European Health Interview Survey 2008 - Eurostat                                       |
| 35 | Russian Federation  | 2 | 3520  | Russia World Health Survey 2003                                                                |
| 36 |                     |   |       | Russia WHO Study on Global AGEing and Adult Health 2007-2010                                   |
| 37 | Rwanda              | 4 | 38    | Rwanda Demographic and Health Survey 2005                                                      |
| 38 |                     |   |       | Rwanda Demographic and Health Survey 2010-2011                                                 |
| 39 |                     |   |       | Rwanda Demographic and Health Survey 2010-2011                                                 |
| 40 |                     |   |       | Rwanda Demographic and Health Survey 2014-2015                                                 |

|    |                                  |   |      |                                                                                                                                             |
|----|----------------------------------|---|------|---------------------------------------------------------------------------------------------------------------------------------------------|
| 1  |                                  |   |      | Women are considerably more exposed to intimate partner violence than men in Rwanda: results from a population-based, cross-sectional study |
| 2  |                                  |   |      |                                                                                                                                             |
| 3  |                                  |   |      |                                                                                                                                             |
| 4  | Saint Kitts and Nevis            | 0 | 0    |                                                                                                                                             |
| 5  | Saint Lucia                      | 0 | 0    |                                                                                                                                             |
| 6  | Saint Vincent and the Grenadines | 0 | 0    |                                                                                                                                             |
| 7  |                                  |   |      |                                                                                                                                             |
| 8  |                                  |   |      |                                                                                                                                             |
| 9  | Samoa                            | 1 | 1    | Samoa Family Health and Safety Study 2000                                                                                                   |
| 10 | San Marino                       | 0 | 0    |                                                                                                                                             |
| 11 |                                  |   |      |                                                                                                                                             |
| 12 | Sao Tome and Principe            | 1 | 7    | Sao Tome and Principe Demographic and Health Survey 2008-2009                                                                               |
| 13 | Saudi Arabia                     | 0 | 0    |                                                                                                                                             |
| 14 | Senegal                          | 2 | 157  | Senegal World Health Survey 2003                                                                                                            |
| 15 |                                  |   |      | Senegal Demographic and Health Survey 2005                                                                                                  |
| 16 |                                  |   |      |                                                                                                                                             |
| 17 | Serbia                           | 1 | 160  | European Hospital Morbidity Database, 2008                                                                                                  |
| 18 | Seychelles                       | 0 | 0    |                                                                                                                                             |
| 19 |                                  |   |      |                                                                                                                                             |
| 20 | Sierra Leone                     | 1 | 16   | Sierra Leone Demographic and Health Survey 2013                                                                                             |
| 21 | Singapore                        | 0 | 0    |                                                                                                                                             |
| 22 |                                  |   |      |                                                                                                                                             |
| 23 | Slovakia                         | 2 | 620  | Slovakia World Health Survey 2003                                                                                                           |
| 24 |                                  |   |      | European Hospital Morbidity Database, 2008                                                                                                  |
| 25 | Slovenia                         | 2 | 2806 | European Hospital Morbidity Database, 2008                                                                                                  |
| 26 |                                  |   |      | Slovenia World Health Survey 2003                                                                                                           |
| 27 |                                  |   |      |                                                                                                                                             |
| 28 | Solomon Islands                  | 0 | 0    |                                                                                                                                             |
| 29 | Somalia                          | 0 | 0    |                                                                                                                                             |
| 30 | South Africa                     | 5 | 5489 | South Africa Demographic and Health Survey 1998                                                                                             |
| 31 |                                  |   |      | South Africa World Health Survey 2002-2003                                                                                                  |
| 32 |                                  |   |      | South Africa WHO Study on Global AGEing and Adult Health 2007-2008                                                                          |
| 33 |                                  |   |      | Prevalence of emotional, physical and sexual abuse of women in three South African provinces                                                |
| 34 |                                  |   |      | South Africa National HIV Prevalence, Incidence, Behavior and Communication Survey 2008-2009                                                |
| 35 |                                  |   |      |                                                                                                                                             |
| 36 |                                  |   |      |                                                                                                                                             |
| 37 | South Sudan                      | 0 | 0    |                                                                                                                                             |
| 38 | Spain                            | 2 | 265  | Spain World Health Survey 2002-2003                                                                                                         |
| 39 |                                  |   |      | Spain Household Survey on Alcohol and Drugs 2007-2008                                                                                       |
| 40 |                                  |   |      |                                                                                                                                             |
| 41 | Sri Lanka                        | 1 | 155  | Sri Lanka World Health Survey 2003                                                                                                          |
| 42 |                                  |   |      |                                                                                                                                             |



|    |                            |    |      |                                                                                                                           |
|----|----------------------------|----|------|---------------------------------------------------------------------------------------------------------------------------|
| 1  | Sudan                      | 0  | 0    |                                                                                                                           |
| 2  | Suriname                   | 0  | 0    |                                                                                                                           |
| 3  |                            |    |      |                                                                                                                           |
| 4  | Sweden                     | 16 | 2234 | Sweden National Patient Register 2001                                                                                     |
| 5  |                            |    |      | Sweden National Patient Register 2002                                                                                     |
| 6  |                            |    |      | Sweden National Patient Register 2003                                                                                     |
| 7  |                            |    |      | Sweden National Patient Register 2004                                                                                     |
| 8  |                            |    |      | Sweden National Patient Register 2005                                                                                     |
| 9  |                            |    |      | Sweden National Patient Register 2006                                                                                     |
| 10 |                            |    |      | Sweden National Patient Register 2007                                                                                     |
| 11 |                            |    |      | Sweden National Patient Register 2008                                                                                     |
| 12 |                            |    |      | Sweden National Patient Register 2009                                                                                     |
| 13 |                            |    |      | Sweden National Patient Register 2010                                                                                     |
| 14 |                            |    |      | Sweden National Patient Register 2011                                                                                     |
| 15 |                            |    |      | Sweden National Patient Register 2012                                                                                     |
| 16 |                            |    |      | Sweden National Patient Register 1998-2002                                                                                |
| 17 |                            |    |      | Sweden National Patient Register 2003-2007                                                                                |
| 18 |                            |    |      | Sweden National Patient Register 2008-2012                                                                                |
| 19 |                            |    |      | Self-reported exposure to intimate partner violence among women and men in Sweden: results from a population-based survey |
| 20 |                            |    |      |                                                                                                                           |
| 21 |                            |    |      |                                                                                                                           |
| 22 |                            |    |      |                                                                                                                           |
| 23 |                            |    |      |                                                                                                                           |
| 24 |                            |    |      |                                                                                                                           |
| 25 |                            |    |      |                                                                                                                           |
| 26 | Switzerland                | 1  | 3984 | European Hospital Morbidity Database, 2008                                                                                |
| 27 |                            |    |      |                                                                                                                           |
| 28 | Syrian Arab Republic       | 1  | 4    | Injuries in Aleppo, Syria; first population-based estimates and characterization of predominant types                     |
| 29 | Taiwan (Province of China) | 0  | 0    |                                                                                                                           |
| 30 | Tajikistan                 | 1  | 7    | Tajikistan Demographic and Health Survey 2012                                                                             |
| 31 |                            |    |      |                                                                                                                           |
| 32 | Thailand                   | 1  | 48   | Thailand National Injury Survey 2003-2004                                                                                 |
| 33 | Timor-Leste                | 1  | 7    | Timor-Leste Demographic and Health Survey 2009-2010                                                                       |
| 34 | Togo                       | 1  | 7    | Togo Demographic and Health Survey 2013-2014                                                                              |
| 35 |                            |    |      |                                                                                                                           |
| 36 | Tokelau                    | 0  | 0    |                                                                                                                           |
| 37 | Tonga                      | 1  | 6    | Tonga National Study on Domestic Violence Against Women 2008-2009                                                         |
| 38 |                            |    |      |                                                                                                                           |
| 39 | Trinidad and Tobago        | 0  | 0    |                                                                                                                           |
| 40 | Tunisia                    | 1  | 165  | Tunisia World Health Survey 2003                                                                                          |
| 41 | Turkey                     | 4  | 213  | Turkey World Health Survey 2003                                                                                           |
| 42 |                            |    |      |                                                                                                                           |

|    |                             |    |       |                                                                                         |
|----|-----------------------------|----|-------|-----------------------------------------------------------------------------------------|
| 1  |                             |    |       | Turkey National Research on Domestic Violence Against Women 2008                        |
| 2  |                             |    |       | Turkey National Research on Domestic Violence Against Women 2014                        |
| 3  |                             |    |       | Turkey Diagnosis-Related Group Hospital Inpatient Database 2011-2012                    |
| 4  |                             |    |       |                                                                                         |
| 5  | Turkmenistan                | 0  | 0     |                                                                                         |
| 6  | Tuvalu                      | 0  | 0     |                                                                                         |
| 7  |                             |    |       |                                                                                         |
| 8  | Uganda                      | 3  | 39    | Uganda Child Verbal Autopsy Study 2007                                                  |
| 9  |                             |    |       | Uganda AIDS Indicator Survey 2011                                                       |
| 10 |                             |    |       | Uganda Demographic and Health Survey 2011                                               |
| 11 |                             |    |       |                                                                                         |
| 12 | Ukraine                     | 2  | 161   | Ukraine Demographic and Health Survey 2007                                              |
| 13 |                             |    |       | Ukraine World Health Survey 2002-2003                                                   |
| 14 | United Arab Emirates        | 1  | 135   | United Arab Emirates World Health Survey 2003                                           |
| 15 |                             |    |       |                                                                                         |
| 16 | United Kingdom              | 8  | 49268 | United Kingdom - England Hospital Episode Statistics 2003-2007                          |
| 17 |                             |    |       | United Kingdom - England Hospital Episode Statistics 2001-2002                          |
| 18 |                             |    |       | United Kingdom - England Hospital Episode Statistics 2008-2012                          |
| 19 |                             |    |       | United Kingdom - England Hospital Episode Statistics 2013-2014                          |
| 20 |                             |    |       | United Kingdom - England Adult Psychiatric Morbidity Survey 2006-2007 - UK Data Service |
| 21 |                             |    |       | United Kingdom - Scottish Crime and Justice Survey 2008-2009 - UK Data Service          |
| 22 |                             |    |       | United Kingdom - Scottish Crime and Justice Survey 2009-2010 - UK Data Service          |
| 23 |                             |    |       | United Kingdom - Scottish Crime and Justice Survey 2010-2011 - UK Data Service          |
| 24 |                             |    |       |                                                                                         |
| 25 |                             |    |       |                                                                                         |
| 26 | United Republic of Tanzania | 2  | 14    | Tanzania Demographic and Health Survey 2009-2010                                        |
| 27 |                             |    |       | Tanzania Demographic and Health Survey 2015-2016                                        |
| 28 |                             |    |       |                                                                                         |
| 29 | United States of America    | 44 | 81198 | United States National Hospital Ambulatory Medical Care Survey 1992                     |
| 30 |                             |    |       | United States National Hospital Ambulatory Medical Care Survey 2008                     |
| 31 |                             |    |       | United States National Hospital Ambulatory Medical Care Survey 2009                     |
| 32 |                             |    |       | United States National Hospital Ambulatory Medical Care Survey 2010                     |
| 33 |                             |    |       | United States National Hospital Ambulatory Medical Care Survey 1993                     |
| 34 |                             |    |       | United States National Hospital Ambulatory Medical Care Survey 1994                     |
| 35 |                             |    |       | United States National Hospital Ambulatory Medical Care Survey 1995                     |
| 36 |                             |    |       | United States National Hospital Ambulatory Medical Care Survey 1996                     |
| 37 |                             |    |       | United States National Hospital Ambulatory Medical Care Survey 1997                     |
| 38 |                             |    |       | United States National Hospital Ambulatory Medical Care Survey 1998                     |
| 39 |                             |    |       |                                                                                         |
| 40 |                             |    |       |                                                                                         |
| 41 |                             |    |       |                                                                                         |
| 42 |                             |    |       |                                                                                         |

|    |  |  |                                                                     |
|----|--|--|---------------------------------------------------------------------|
| 1  |  |  | United States National Hospital Ambulatory Medical Care Survey 1999 |
| 2  |  |  | United States National Hospital Ambulatory Medical Care Survey 2002 |
| 3  |  |  | United States National Hospital Ambulatory Medical Care Survey 2000 |
| 4  |  |  | United States National Hospital Ambulatory Medical Care Survey 2001 |
| 5  |  |  | United States National Hospital Ambulatory Medical Care Survey 2003 |
| 6  |  |  | United States National Hospital Ambulatory Medical Care Survey 2004 |
| 7  |  |  | United States National Hospital Ambulatory Medical Care Survey 2005 |
| 8  |  |  | United States National Hospital Ambulatory Medical Care Survey 2006 |
| 9  |  |  | United States National Hospital Ambulatory Medical Care Survey 2007 |
| 10 |  |  | United States National Health Interview Survey 2008                 |
| 11 |  |  | United States National Health Interview Survey 2009                 |
| 12 |  |  | United States National Hospital Ambulatory Medical Care Survey 2011 |
| 13 |  |  | United States National Health Interview Survey 2010                 |
| 14 |  |  | United States National Ambulatory Medical Care Survey 2012          |
| 15 |  |  | United States National Health Interview Survey 2011                 |
| 16 |  |  | United States National Hospital Discharge Survey 1988-1992          |
| 17 |  |  | United States National Hospital Discharge Survey 1993-1997          |
| 18 |  |  | United States National Hospital Discharge Survey 1998-2002          |
| 19 |  |  | United States National Hospital Discharge Survey 2003-2007          |
| 20 |  |  | United States National Hospital Discharge Survey 2008-2010          |
| 21 |  |  | United States National Hospital Ambulatory Medical Care Survey 2012 |
| 22 |  |  | United States National Ambulatory Medical Care Survey 2013          |
| 23 |  |  | United States National Hospital Ambulatory Medical Care Survey 2013 |
| 24 |  |  | United States State Inpatient Databases 2003-2007                   |
| 25 |  |  | United States State Inpatient Databases 2008-2009                   |
| 26 |  |  | United States National Hospital Ambulatory Medical Care Survey 2014 |
| 27 |  |  | United States Behavioral Risk Factor Surveillance System 2003       |
| 28 |  |  | United States Behavioral Risk Factor Surveillance System 2006       |
| 29 |  |  | United States Behavioral Risk Factor Surveillance System 2008       |
| 30 |  |  | United States Behavioral Risk Factor Surveillance System 2012       |
| 31 |  |  | United States Behavioral Risk Factor Surveillance System 2005       |
| 32 |  |  |                                                                     |
| 33 |  |  |                                                                     |
| 34 |  |  |                                                                     |
| 35 |  |  |                                                                     |
| 36 |  |  |                                                                     |
| 37 |  |  |                                                                     |
| 38 |  |  |                                                                     |
| 39 |  |  |                                                                     |
| 40 |  |  |                                                                     |
| 41 |  |  |                                                                     |
| 42 |  |  |                                                                     |

|    |                                          |   |      |                                                                                                      |
|----|------------------------------------------|---|------|------------------------------------------------------------------------------------------------------|
| 1  |                                          |   |      | United States Behavioral Risk Factor Surveillance System 2007                                        |
| 2  |                                          |   |      | United States National Epidemiologic Survey on Alcohol and Related Conditions 2004-2005              |
| 3  |                                          |   |      | United States Gender, Alcohol and Culture: An International Study (GENACIS) 1995-1996                |
| 4  |                                          |   |      |                                                                                                      |
| 5  | United States Virgin Islands             | 4 | 99   | United States Behavioral Risk Factor Surveillance System 2003                                        |
| 6  |                                          |   |      | United States Behavioral Risk Factor Surveillance System 2005                                        |
| 7  |                                          |   |      | United States Behavioral Risk Factor Surveillance System 2006                                        |
| 8  |                                          |   |      | United States Behavioral Risk Factor Surveillance System 2008                                        |
| 9  |                                          |   |      |                                                                                                      |
| 10 | Uruguay                                  | 1 | 155  | Uruguay World Health Survey 2002-2003                                                                |
| 11 |                                          |   |      |                                                                                                      |
| 12 | Uzbekistan                               | 0 | 0    |                                                                                                      |
| 13 | Vanuatu                                  | 0 | 0    |                                                                                                      |
| 14 |                                          |   |      |                                                                                                      |
| 15 | Venezuela (Bolivarian<br>16 Republic of) | 0 | 0    |                                                                                                      |
| 17 | Viet Nam                                 | 7 | 1746 | Vietnam World Health Survey 2002-2003                                                                |
| 18 |                                          |   |      | Injury and pre-hospital trauma care in Hanoi, Vietnam                                                |
| 19 |                                          |   |      | Community-based assessment of unintentional injuries: a pilot study in rural Vietnam                 |
| 20 |                                          |   |      | Vietnam Hospital Data 2013                                                                           |
| 21 |                                          |   |      | Vietnam Injury Survey 2010                                                                           |
| 22 |                                          |   |      | Vietnam Multi-Center Injury Survey 2001                                                              |
| 23 |                                          |   |      | Suicide attempt in a rural area of Vietnam: Incidence, methods used and access to mental health care |
| 24 |                                          |   |      |                                                                                                      |
| 25 | Yemen                                    | 0 | 0    |                                                                                                      |
| 26 |                                          |   |      |                                                                                                      |
| 27 | Zambia                                   | 6 | 186  | Zambia Demographic and Health Survey 2001-2002                                                       |
| 28 |                                          |   |      | Zambia Demographic and Health Survey 2007                                                            |
| 29 |                                          |   |      | Zambia World Health Survey 2003                                                                      |
| 30 |                                          |   |      | Zambia Sexual Behavior Survey 2005                                                                   |
| 31 |                                          |   |      | Zambia Sexual Behavior Survey 2009                                                                   |
| 32 |                                          |   |      | Zambia Demographic and Health Survey 2013-2014                                                       |
| 33 |                                          |   |      |                                                                                                      |
| 34 | Zimbabwe                                 | 4 | 193  | Zimbabwe World Health Survey 2003                                                                    |
| 35 |                                          |   |      | Zimbabwe Demographic and Health Survey 2005-2006                                                     |
| 36 |                                          |   |      | Zimbabwe Demographic and Health Survey 2010-2011                                                     |
| 37 |                                          |   |      | Zimbabwe Demographic and Health Survey 2015                                                          |
| 38 |                                          |   |      |                                                                                                      |
| 39 |                                          |   |      |                                                                                                      |
| 40 |                                          |   |      |                                                                                                      |

**Table 2. Global Burden of Disease severity hierarchy for nature-of-injury**

| Rank | Inpatient hierarchy                                                                                                                         | Outpatient hierarchy                                                    |
|------|---------------------------------------------------------------------------------------------------------------------------------------------|-------------------------------------------------------------------------|
| 1    | Spinal cord lesion below neck level                                                                                                         | Fracture of pelvis                                                      |
| 2    | Amputation of lower limbs, bilateral                                                                                                        | Fracture of patella, tibia or fibula, or ankle                          |
| 3    | Amputation of upper limbs, bilateral                                                                                                        | Fracture of hip                                                         |
| 4    | Spinal cord lesion at neck level                                                                                                            | Fracture of skull                                                       |
| 5    | Fracture of hip                                                                                                                             | Amputation of thumb                                                     |
| 6    | Fracture of femur, other than femoral neck                                                                                                  | Fracture of vertebral column                                            |
| 7    | Amputation of upper limb, unilateral                                                                                                        | Multiple fractures, dislocations, crashes, wounds, sprains, and strains |
| 8    | Amputation of lower limb, unilateral                                                                                                        | Internal hemorrhage in abdomen and pelvis                               |
| 9    | Multiple fractures, dislocations, crashes, wounds, sprains, and strains                                                                     | Fracture of femur, other than femoral neck                              |
| 10   | Effect of different environmental factors                                                                                                   | Dislocation of hip                                                      |
| 11   | Fracture of patella, tibia or fibula, or ankle                                                                                              | Amputation of toe/toes                                                  |
| 12   | Moderate-Severe traumatic brain injury                                                                                                      | Fracture of hand (wrist and other distal part of hand)                  |
| 13   | Fracture of foot bones except ankle                                                                                                         | Amputation of fingers (excluding thumb)                                 |
| 14   | Internal hemorrhage in abdomen and pelvis                                                                                                   | Burns, <20% of total burned surface area without lower airway burns     |
| 15   | Crush injury                                                                                                                                | Dislocation of knee                                                     |
| 16   | Minor traumatic brain injury                                                                                                                | Contusion in any part of the body                                       |
| 17   | Fracture of pelvis                                                                                                                          | Minor traumatic brain injury                                            |
| 18   | Nerve injury                                                                                                                                | Foreign body in respiratory system                                      |
| 19   | Severe chest injury                                                                                                                         | Severe chest injury                                                     |
| 20   | Dislocation of hip                                                                                                                          | Drowning and nonfatal submersion                                        |
| 21   | Burns, $\geq 20\%$ total burned surface area or $\geq 10\%$ burned surface area if head/neck or hands/wrist involved w/o lower airway burns | Asphyxiation                                                            |
| 22   | Lower airway burns                                                                                                                          | Poisoning requiring urgent care                                         |
| 23   | Fracture of skull                                                                                                                           | Effect of different environmental factors                               |
| 24   | Amputation of thumb                                                                                                                         | Foreign body in GI and urogenital system                                |
| 25   | Fracture of hand (wrist and other distal part of hand)                                                                                      | Fracture of sternum and/or fracture of one or more ribs                 |
| 26   | Fracture of vertebral column                                                                                                                | Nerve injury                                                            |
| 27   | Contusion in any part of the body                                                                                                           | Fracture of face bones                                                  |
| 28   | Open wound(s)                                                                                                                               | Dislocation of shoulder                                                 |
| 29   | Amputation of toe/toes                                                                                                                      | Injury to eyes                                                          |
| 30   | Dislocation of knee                                                                                                                         | Fracture of clavicle, scapula, or humerus                               |
| 31   | Amputation of fingers (excluding thumb)                                                                                                     | Fracture of radius and/or ulna                                          |
| 32   | Drowning and nonfatal submersion                                                                                                            | Fracture of foot bones except ankle                                     |
| 33   | Asphyxiation                                                                                                                                | Foreign body in ear                                                     |

| Rank | Inpatient hierarchy                                                           | Outpatient hierarchy                                                          |
|------|-------------------------------------------------------------------------------|-------------------------------------------------------------------------------|
| 34   | Burns, <20% total burned surface area without lower airway burns              | Muscle and tendon injuries, including sprains and strains lesser dislocations |
| 35   | Muscle and tendon injuries, including sprains and strains lesser dislocations | Superficial injury of any part of the body                                    |
| 36   | Fracture of face bones                                                        | Open wound(s)                                                                 |
| 37   | Foreign body in respiratory system                                            | Complications following therapeutic procedures                                |
| 38   | Poisoning requiring urgent care                                               |                                                                               |
| 39   | Foreign body in GI and urogenital system                                      |                                                                               |
| 40   | Fracture of sternum and/or fracture of one or more ribs                       |                                                                               |
| 41   | Dislocation of shoulder                                                       |                                                                               |
| 42   | Injury to eyes                                                                |                                                                               |
| 43   | Fracture of clavicle, scapula, or humerus                                     |                                                                               |
| 44   | Fracture of radius and/or ulna                                                |                                                                               |
| 45   | Foreign body in ear                                                           |                                                                               |
| 46   | Superficial injury of any part of the body                                    |                                                                               |
| 47   | Complications following therapeutic procedures                                |                                                                               |

**Table 3. Global Burden of Disease lay descriptions and disability weights for health states**

| Health state                                                                        | Lay description                                                                                                                                                                                                                              | Disability weight      |
|-------------------------------------------------------------------------------------|----------------------------------------------------------------------------------------------------------------------------------------------------------------------------------------------------------------------------------------------|------------------------|
| Concussion                                                                          | has headaches, dizziness, nausea and difficulty concentrating.                                                                                                                                                                               | 0.110<br>(0.074–0.158) |
| Severe traumatic brain injury: short term, with or without treatment                | cannot concentrate and has headaches, memory problems, dizziness, and feels angry.                                                                                                                                                           | 0.214<br>(0.141–0.297) |
| Traumatic brain injury: long-term consequences, minor, with or without treatment    | has episodes of headaches, memory problems, and difficulty concentrating.                                                                                                                                                                    | 0.094<br>(0.063–0.133) |
| Traumatic brain injury: long-term consequences, moderate, with or without treatment | has frequent headaches, memory problems, difficulty concentrating, and dizziness. The person is often anxious and moody.                                                                                                                     | 0.231<br>(0.156–0.324) |
| Traumatic brain injury: long-term consequences, severe, with or without treatment   | cannot think clearly and has frequent headaches, memory problems, difficulty concentrating and dizziness. The person is often anxious and moody, and depends on others for feeding, toileting, dressing and walking.                         | 0.637<br>(0.462–0.789) |
| Spinal cord lesion below neck: treated                                              | is paralyzed from the waist down, cannot feel or move the legs and has difficulties with urine and bowel control. The person uses a wheelchair to move around.                                                                               | 0.296<br>(0.198–0.414) |
| Spinal cord lesion below neck: untreated                                            | is paralyzed from the waist down, cannot feel or move the legs and has difficulties with urine and bowel control. Legs are in fixed, bent positions, and the person gets frequent infections and pressure sores.                             | 0.623<br>(0.434–0.777) |
| Spinal cord lesion at neck: treated                                                 | is paralyzed from the neck down, with no feeling or control over any part of the body below the neck, and no urine or bowel control.                                                                                                         | 0.589<br>(0.415–0.748) |
| Spinal cord lesion at neck: untreated                                               | is paralyzed from the neck down, with no feeling or control over any part of the body below the neck, and no urine or bowel control. Arms and legs are in fixed, bent positions, and the person gets frequent infections and pressure sores. | 0.732<br>(0.544–0.871) |

**eTable 4. Global Burden of Disease (GBD) location hierarchy: 7 GBD super regions, 21 GBD regions, and 204 countries and territories**

| <b>GBD hierarchy</b> | <b>Location</b>           |
|----------------------|---------------------------|
| GBD super region     | High-income               |
| GBD region           | High-income North America |
|                      | Canada                    |
|                      | Greenland                 |
|                      | United States of America  |
| GBD region           | Australasia               |
|                      | Australia                 |
|                      | New Zealand               |
| GBD region           | High-income Asia Pacific  |
|                      | Brunei Darussalam         |
|                      | Japan                     |
|                      | Republic of Korea         |
|                      | Singapore                 |
| GBD region           | Western Europe            |
|                      | Andorra                   |
|                      | Austria                   |
|                      | Belgium                   |
|                      | Cyprus                    |
|                      | Denmark                   |
|                      | Finland                   |
|                      | France                    |
|                      | Germany                   |
|                      | Greece                    |
|                      | Iceland                   |
|                      | Ireland                   |
|                      | Israel                    |
|                      | Italy                     |
|                      | Luxembourg                |
|                      | Malta                     |
|                      | Monaco                    |
|                      | Netherlands               |
|                      | Norway                    |
|                      | Portugal                  |
|                      | San Marino                |
|                      | Spain                     |
|                      | Sweden                    |
|                      | Switzerland               |
|                      | United Kingdom            |
| GBD region           | Southern Latin America    |
|                      | Argentina                 |



| <b>GBD hierarchy</b> | <b>Location</b>                                  |
|----------------------|--------------------------------------------------|
|                      | Chile                                            |
|                      | Uruguay                                          |
| GBD super region     | Central Europe, Eastern Europe, and Central Asia |
| GBD region           | Eastern Europe                                   |
|                      | Belarus                                          |
|                      | Estonia                                          |
|                      | Latvia                                           |
|                      | Lithuania                                        |
|                      | Republic of Moldova                              |
|                      | Russian Federation                               |
|                      | Ukraine                                          |
| GBD region           | Central Europe                                   |
|                      | Albania                                          |
|                      | Bosnia and Herzegovina                           |
|                      | Bulgaria                                         |
|                      | Croatia                                          |
|                      | Czechia                                          |
|                      | Hungary                                          |
|                      | Montenegro                                       |
|                      | North Macedonia                                  |
|                      | Poland                                           |
|                      | Romania                                          |
|                      | Serbia                                           |
|                      | Slovakia                                         |
|                      | Slovenia                                         |
| GBD region           | Central Asia                                     |
|                      | Armenia                                          |
|                      | Azerbaijan                                       |
|                      | Georgia                                          |
|                      | Kazakhstan                                       |
|                      | Kyrgyzstan                                       |
|                      | Mongolia                                         |
|                      | Tajikistan                                       |
|                      | Turkmenistan                                     |
|                      | Uzbekistan                                       |
| GBD super region     | Latin America and Caribbean                      |
| GBD region           | Central Latin America                            |
|                      | Colombia                                         |
|                      | Costa Rica                                       |
|                      | El Salvador                                      |
|                      | Guatemala                                        |

| <b>GBD hierarchy</b> | <b>Location</b>                        |
|----------------------|----------------------------------------|
|                      | Honduras                               |
|                      | Mexico                                 |
|                      | Nicaragua                              |
|                      | Panama                                 |
|                      | Venezuela (Bolivarian Republic of)     |
| GBD region           | Andean Latin America                   |
|                      | Bolivia (Plurinational State of)       |
|                      | Ecuador                                |
|                      | Peru                                   |
| GBD region           | Caribbean                              |
|                      | Antigua and Barbuda                    |
|                      | Bahamas                                |
|                      | Barbados                               |
|                      | Belize                                 |
|                      | Bermuda                                |
|                      | Cuba                                   |
|                      | Dominica                               |
|                      | Dominican Republic                     |
|                      | Grenada                                |
|                      | Guyana                                 |
|                      | Haiti                                  |
|                      | Jamaica                                |
|                      | Puerto Rico                            |
|                      | Saint Lucia                            |
|                      | Saint Kitts and Nevis                  |
|                      | Saint Vincent and the Grenadines       |
|                      | Suriname                               |
|                      | Trinidad and Tobago                    |
|                      | United States Virgin Islands           |
| GBD region           | Tropical Latin America                 |
|                      | Brazil                                 |
|                      | Paraguay                               |
| GBD super region     | Southeast Asia, East Asia, and Oceania |
| GBD region           | East Asia                              |
|                      | China                                  |
|                      | Democratic People's Republic of Korea  |
|                      | Taiwan (Province of China)             |
| GBD region           | Southeast Asia                         |
|                      | Cambodia                               |
|                      | Indonesia                              |
|                      | Lao People's Democratic Republic       |
|                      | Malaysia                               |

| <b>GBD hierarchy</b> | <b>Location</b>                  |
|----------------------|----------------------------------|
|                      | Maldives                         |
|                      | Mauritius                        |
|                      | Myanmar                          |
|                      | Philippines                      |
|                      | Seychelles                       |
|                      | Sri Lanka                        |
|                      | Thailand                         |
|                      | Timor-Leste                      |
|                      | Viet Nam                         |
| GBD region           | Oceania                          |
|                      | American Samoa                   |
|                      | Cook Islands                     |
|                      | Fiji                             |
|                      | Guam                             |
|                      | Kiribati                         |
|                      | Marshall Islands                 |
|                      | Micronesia (Federated States of) |
|                      | Nauru                            |
|                      | Niue                             |
|                      | Northern Mariana Islands         |
|                      | Palau                            |
|                      | Papua New Guinea                 |
|                      | Samoa                            |
|                      | Solomon Islands                  |
|                      | Tokelau                          |
|                      | Tonga                            |
|                      | Vanuatu                          |
|                      | Tuvalu                           |
| GBD super region     | North Africa and Middle East     |
| GBD region           | North Africa and Middle East     |
|                      | Afghanistan                      |
|                      | Algeria                          |
|                      | Bahrain                          |
|                      | Egypt                            |
|                      | Iran (Islamic Republic of)       |
|                      | Iraq                             |
|                      | Jordan                           |
|                      | Kuwait                           |
|                      | Lebanon                          |
|                      | Libya                            |
|                      | Morocco                          |
|                      | Oman                             |

| <b>GBD hierarchy</b> | <b>Location</b>             |
|----------------------|-----------------------------|
|                      | Palestine                   |
|                      | Qatar                       |
|                      | Saudi Arabia                |
|                      | Sudan                       |
|                      | Syrian Arab Republic        |
|                      | Tunisia                     |
|                      | Turkey                      |
|                      | United Arab Emirates        |
|                      | Yemen                       |
| GBD super region     | South Asia                  |
| GBD region           | South Asia                  |
|                      | Bangladesh                  |
|                      | Bhutan                      |
|                      | India                       |
|                      | Nepal                       |
|                      | Pakistan                    |
| GBD super region     | Sub-Saharan Africa          |
| GBD region           | Southern Sub-Saharan Africa |
|                      | Botswana                    |
|                      | Eswatini                    |
|                      | Lesotho                     |
|                      | Namibia                     |
|                      | South Africa                |
|                      | Zimbabwe                    |
| GBD region           | Western Sub-Saharan Africa  |
|                      | Benin                       |
|                      | Burkina Faso                |
|                      | Cape Verde                  |
|                      | Cameroon                    |
|                      | Chad                        |
|                      | Côte d'Ivoire               |
|                      | Gambia                      |
|                      | Ghana                       |
|                      | Guinea                      |
|                      | Guinea-Bissau               |
|                      | Liberia                     |
|                      | Mali                        |
|                      | Mauritania                  |
|                      | Niger                       |
|                      | Nigeria                     |
|                      | Sao Tome and Principe       |
|                      | Senegal                     |

| <b>GBD hierarchy</b> | <b>Location</b>                  |
|----------------------|----------------------------------|
|                      | Sierra Leone                     |
|                      | Togo                             |
| GBD region           | Eastern Sub-Saharan Africa       |
|                      | Burundi                          |
|                      | Comoros                          |
|                      | Djibouti                         |
|                      | Eritrea                          |
|                      | Ethiopia                         |
|                      | Kenya                            |
|                      | Madagascar                       |
|                      | Malawi                           |
|                      | Mozambique                       |
|                      | Rwanda                           |
|                      | Somalia                          |
|                      | South Sudan                      |
|                      | Uganda                           |
|                      | United Republic of Tanzania      |
|                      | Zambia                           |
| GBD region           | Central Sub-Saharan Africa       |
|                      | Angola                           |
|                      | Central African Republic         |
|                      | Congo                            |
|                      | Democratic Republic of the Congo |
|                      | Equatorial Guinea                |
|                      | Gabon                            |

**eTable 5. Global Burden of Disease world population standard**

| Age group      | Percent of population | Rounded |
|----------------|-----------------------|---------|
| Early neonatal | 0.039706188           | 0.04    |
| Late neonatal  | 0.118021789           | 0.12    |
| Post neonatal  | 1.868264909           | 1.87    |
| <1             | 2.025992886           | 2.03    |
| 1 to 4         | 7.909875913           | 7.91    |
| 5 to 9         | 9.568418272           | 9.57    |
| 10 to 14       | 8.990277942           | 8.99    |
| 15 to 19       | 8.324362192           | 8.32    |
| 20 to 24       | 7.866450176           | 7.87    |
| 25 to 29       | 7.632917343           | 7.63    |
| 30 to 34       | 7.331511124           | 7.33    |
| 35 to 39       | 6.811055              | 6.81    |
| 40 to 44       | 6.136798184           | 6.14    |
| 45 to 49       | 5.509495973           | 5.51    |
| 50 to 54       | 4.921822565           | 4.92    |
| 55 to 59       | 4.345633072           | 4.35    |
| 60 to 64       | 3.684473754           | 3.68    |
| 65 to 69       | 2.991239718           | 2.99    |
| 70 to 74       | 2.272487547           | 2.27    |
| 75 to 79       | 1.607371655           | 1.61    |
| 80 to 84       | 1.113034599           | 1.11    |
| 85 to 89       | 0.61707008            | 0.62    |
| 90 to 94       | 0.255008068           | 0.26    |
| 95 plus        | 0.084703935           | 0.08    |

eTable 6. Global Burden of Disease (GBD) cause hierarchy with levels for injuries

| Cause                                                  | Level |
|--------------------------------------------------------|-------|
| Injuries                                               | 1     |
| Transport injuries                                     | 2     |
| Road injuries                                          | 3     |
| <b>Pedestrian road injuries</b>                        | 4     |
| <b>Cyclist road injuries</b>                           | 4     |
| <b>Motorcyclist road injuries</b>                      | 4     |
| <b>Motor vehicle road injuries</b>                     | 4     |
| <b>Other road injuries</b>                             | 4     |
| <b>Other transport injuries</b>                        | 3     |
| Unintentional injuries                                 | 2     |
| <b>Falls</b>                                           | 3     |
| <b>Drowning</b>                                        | 3     |
| <b>Fire, heat, and hot substances</b>                  | 3     |
| Poisonings                                             | 3     |
| <b>Poisoning by carbon monoxide</b>                    | 4     |
| <b>Poisoning by other means</b>                        | 4     |
| Exposure to mechanical forces                          | 3     |
| <b>Unintentional firearm injuries</b>                  | 4     |
| <b>Other exposure to mechanical forces</b>             | 4     |
| <b>Adverse effects of medical treatment</b>            | 3     |
| Animal contact                                         | 3     |
| <b>Venomous animal contact</b>                         | 4     |
| <b>Non-venomous animal contact</b>                     | 4     |
| Foreign body                                           | 3     |
| <b>Pulmonary aspiration and foreign body in airway</b> | 4     |
| <b>Foreign body in eyes</b>                            | 4     |
| <b>Foreign body in other body part</b>                 | 4     |
| <b>Environmental heat and cold exposure</b>            | 3     |
| <b>Exposure to forces of nature</b>                    | 3     |
| <b>Other unintentional injuries</b>                    | 3     |
| Self-harm and interpersonal violence                   | 2     |
| Self-harm                                              | 3     |
| <b>Self-harm by firearm</b>                            | 4     |
| <b>Self-harm by other specified means</b>              | 4     |
| Interpersonal violence                                 | 3     |
| <b>Physical violence by firearm</b>                    | 4     |
| <b>Physical violence by sharp object</b>               | 4     |
| <b>Physical violence by other means</b>                | 4     |
| <b>Conflict and terrorism</b>                          | 3     |
| <b>Executions and police conflict</b>                  | 3     |

The 29 causes in **bold** (they were called the most detailed causes in the GBD 2019 study) were analyzed in our study, which was consistent with the statistical analysis in the previous GBD 2016 study published in The Lancet Neurology.

**eTable 7. Global Burden of Disease locational ISO3 code and Socio-demographic Index (SDI), 2019**

| Location                         | ISO3 code | SDI   |
|----------------------------------|-----------|-------|
| Afghanistan                      | AFG       | 0.343 |
| Albania                          | ALB       | 0.681 |
| Algeria                          | DZA       | 0.652 |
| American Samoa                   | ASM       | 0.712 |
| Andorra                          | AND       | 0.894 |
| Angola                           | AGO       | 0.47  |
| Antigua and Barbuda              | ATG       | 0.743 |
| Argentina                        | ARG       | 0.708 |
| Armenia                          | ARM       | 0.689 |
| Australia                        | AUS       | 0.839 |
| Austria                          | AUT       | 0.849 |
| Azerbaijan                       | AZE       | 0.683 |
| Bahamas                          | BHS       | 0.796 |
| Bahrain                          | BHR       | 0.751 |
| Bangladesh                       | BGD       | 0.483 |
| Barbados                         | BRB       | 0.742 |
| Belarus                          | BLR       | 0.745 |
| Belgium                          | BEL       | 0.851 |
| Belize                           | BLZ       | 0.603 |
| Benin                            | BEN       | 0.352 |
| Bermuda                          | BMU       | 0.813 |
| Bhutan                           | BTN       | 0.455 |
| Bolivia (Plurinational State of) | BOL       | 0.566 |
| Bosnia and Herzegovina           | BIH       | 0.718 |
| Botswana                         | BWA       | 0.634 |
| Brazil                           | BRA       | 0.64  |
| Brunei Darussalam                | BRN       | 0.823 |
| Bulgaria                         | BGR       | 0.764 |
| Burkina Faso                     | BFA       | 0.257 |
| Burundi                          | BDI       | 0.284 |
| Cabo Verde                       | CPV       | 0.525 |
| Cambodia                         | KHM       | 0.469 |
| Cameroon                         | CMR       | 0.49  |
| Canada                           | CAN       | 0.873 |
| Central African Republic         | CAF       | 0.274 |
| Chad                             | TCD       | 0.238 |
| Chile                            | CHL       | 0.759 |
| China                            | CHN       | 0.686 |
| Colombia                         | COL       | 0.633 |
| Comoros                          | COM       | 0.455 |
| Congo                            | COG       | 0.568 |



| <b>Location</b>                       | <b>ISO3 code</b> | <b>SDI</b> |
|---------------------------------------|------------------|------------|
| Cook Islands                          | COK              | 0.764      |
| Costa Rica                            | CRI              | 0.68       |
| Croatia                               | HRV              | 0.794      |
| Cuba                                  | CUB              | 0.668      |
| Cyprus                                | CYP              | 0.841      |
| Czechia                               | CZE              | 0.828      |
| Côte d'Ivoire                         | CIV              | 0.408      |
| Democratic People's Republic of Korea | PRK              | 0.558      |
| Democratic Republic of the Congo      | COD              | 0.382      |
| Denmark                               | DNK              | 0.89       |
| Djibouti                              | DJI              | 0.459      |
| Dominica                              | DMA              | 0.729      |
| Dominican Republic                    | DOM              | 0.592      |
| Ecuador                               | ECU              | 0.64       |
| Egypt                                 | EGY              | 0.658      |
| El Salvador                           | SLV              | 0.573      |
| Equatorial Guinea                     | GNQ              | 0.685      |
| Eritrea                               | ERI              | 0.396      |
| Estonia                               | EST              | 0.835      |
| Eswatini                              | SWZ              | 0.577      |
| Ethiopia                              | ETH              | 0.343      |
| Fiji                                  | FJI              | 0.664      |
| Finland                               | FIN              | 0.856      |
| France                                | FRA              | 0.834      |
| Gabon                                 | GAB              | 0.656      |
| Gambia                                | GMB              | 0.399      |
| Georgia                               | GEO              | 0.702      |
| Germany                               | DEU              | 0.898      |
| Ghana                                 | GHA              | 0.557      |
| Greece                                | GRC              | 0.794      |
| Greenland                             | GRL              | 0.761      |
| Grenada                               | GRD              | 0.669      |
| Guam                                  | GUM              | 0.813      |
| Guatemala                             | GTM              | 0.526      |
| Guinea                                | GIN              | 0.325      |
| Guinea-Bissau                         | GNB              | 0.355      |
| Guyana                                | GUY              | 0.618      |
| Haiti                                 | HTI              | 0.432      |
| Honduras                              | HND              | 0.496      |
| Hungary                               | HUN              | 0.791      |
| Iceland                               | ISL              | 0.869      |
| India                                 | IND              | 0.566      |

| <b>Location</b>                  | <b>ISO3 code</b> | <b>SDI</b> |
|----------------------------------|------------------|------------|
| Indonesia                        | IDN              | 0.66       |
| Iran (Islamic Republic of)       | IRN              | 0.67       |
| Iraq                             | IRQ              | 0.671      |
| Ireland                          | IRL              | 0.867      |
| Israel                           | ISR              | 0.803      |
| Italy                            | ITA              | 0.801      |
| Jamaica                          | JAM              | 0.684      |
| Japan                            | JPN              | 0.87       |
| Jordan                           | JOR              | 0.731      |
| Kazakhstan                       | KAZ              | 0.723      |
| Kenya                            | KEN              | 0.508      |
| Kiribati                         | KIR              | 0.527      |
| Kuwait                           | KWT              | 0.851      |
| Kyrgyzstan                       | KGZ              | 0.596      |
| Lao People's Democratic Republic | LAO              | 0.49       |
| Latvia                           | LVA              | 0.82       |
| Lebanon                          | LBN              | 0.708      |
| Lesotho                          | LSO              | 0.507      |
| Liberia                          | LBR              | 0.37       |
| Libya                            | LBY              | 0.709      |
| Lithuania                        | LTU              | 0.843      |
| Luxembourg                       | LUX              | 0.895      |
| Madagascar                       | MDG              | 0.396      |
| Malawi                           | MWI              | 0.384      |
| Malaysia                         | MYS              | 0.737      |
| Maldives                         | MDV              | 0.562      |
| Mali                             | MLI              | 0.263      |
| Malta                            | MLT              | 0.801      |
| Marshall Islands                 | MHL              | 0.544      |
| Mauritania                       | MRT              | 0.496      |
| Mauritius                        | MUS              | 0.705      |
| Mexico                           | MEX              | 0.649      |
| Micronesia (Federated States of) | FSM              | 0.58       |
| Monaco                           | MCO              | 0.902      |
| Mongolia                         | MNG              | 0.606      |
| Montenegro                       | MNE              | 0.791      |
| Morocco                          | MAR              | 0.548      |
| Mozambique                       | MOZ              | 0.307      |
| Myanmar                          | MMR              | 0.521      |
| Namibia                          | NAM              | 0.612      |
| Nauru                            | NRU              | 0.618      |
| Nepal                            | NPL              | 0.422      |

| <b>Location</b>                  | <b>ISO3 code</b> | <b>SDI</b> |
|----------------------------------|------------------|------------|
| Netherlands                      | NLD              | 0.883      |
| New Zealand                      | NZL              | 0.84       |
| Nicaragua                        | NIC              | 0.517      |
| Niger                            | NER              | 0.162      |
| Nigeria                          | NGA              | 0.515      |
| Niue                             | NIU              | 0.711      |
| North Macedonia                  | MKD              | 0.744      |
| Northern Mariana Islands         | MNP              | 0.771      |
| Norway                           | NOR              | 0.913      |
| Oman                             | OMN              | 0.783      |
| Pakistan                         | PAK              | 0.449      |
| Palau                            | PLW              | 0.738      |
| Palestine                        | PSE              | 0.588      |
| Panama                           | PAN              | 0.686      |
| Papua New Guinea                 | PNG              | 0.394      |
| Paraguay                         | PRY              | 0.638      |
| Peru                             | PER              | 0.648      |
| Philippines                      | PHL              | 0.623      |
| Poland                           | POL              | 0.802      |
| Portugal                         | PRT              | 0.743      |
| Puerto Rico                      | PRI              | 0.814      |
| Qatar                            | QAT              | 0.83       |
| Republic of Korea                | KOR              | 0.878      |
| Republic of Moldova              | MDA              | 0.696      |
| Romania                          | ROU              | 0.76       |
| Russian Federation               | RUS              | 0.805      |
| Rwanda                           | RWA              | 0.429      |
| Saint Kitts and Nevis            | KNA              | 0.746      |
| Saint Lucia                      | LCA              | 0.67       |
| Saint Vincent and the Grenadines | VCT              | 0.627      |
| Samoa                            | WSM              | 0.641      |
| San Marino                       | SMR              | 0.884      |
| Sao Tome and Principe            | STP              | 0.502      |
| Saudi Arabia                     | SAU              | 0.805      |
| Senegal                          | SEN              | 0.389      |
| Serbia                           | SRB              | 0.767      |
| Seychelles                       | SYC              | 0.724      |
| Sierra Leone                     | SLE              | 0.347      |
| Singapore                        | SGP              | 0.861      |
| Slovakia                         | SVK              | 0.812      |
| Slovenia                         | SVN              | 0.84       |
| Solomon Islands                  | SLB              | 0.407      |

| <b>Location</b>                    | <b>ISO3 code</b> | <b>SDI</b> |
|------------------------------------|------------------|------------|
| Somalia                            | SOM              | 0.081      |
| South Africa                       | ZAF              | 0.678      |
| South Sudan                        | SSD              | 0.363      |
| Spain                              | ESP              | 0.767      |
| Sri Lanka                          | LKA              | 0.69       |
| Sudan                              | SDN              | 0.515      |
| Suriname                           | SUR              | 0.636      |
| Sweden                             | SWE              | 0.872      |
| Switzerland                        | CHE              | 0.929      |
| Syrian Arab Republic               | SYR              | 0.619      |
| Taiwan (Province of China)         | TWN              | 0.868      |
| Tajikistan                         | TJK              | 0.539      |
| Thailand                           | THA              | 0.687      |
| Timor-Leste                        | TLS              | 0.514      |
| Togo                               | TGO              | 0.417      |
| Tokelau                            | TKL              | 0.626      |
| Tonga                              | TON              | 0.636      |
| Trinidad and Tobago                | TTO              | 0.757      |
| Tunisia                            | TUN              | 0.672      |
| Turkey                             | TUR              | 0.748      |
| Turkmenistan                       | TKM              | 0.67       |
| Tuvalu                             | TUV              | 0.589      |
| Uganda                             | UGA              | 0.404      |
| Ukraine                            | UKR              | 0.736      |
| United Arab Emirates               | ARE              | 0.88       |
| United Kingdom                     | GBR              | 0.847      |
| United Republic of Tanzania        | TZA              | 0.423      |
| United States of America           | USA              | 0.859      |
| United States Virgin Islands       | VIR              | 0.799      |
| Uruguay                            | URY              | 0.697      |
| Uzbekistan                         | UZB              | 0.631      |
| Vanuatu                            | VUT              | 0.485      |
| Venezuela (Bolivarian Republic of) | VEN              | 0.607      |
| Viet Nam                           | VNM              | 0.617      |
| Yemen                              | YEM              | 0.412      |
| Zambia                             | ZMB              | 0.505      |
| Zimbabwe                           | ZWE              | 0.476      |

Table 8. Incidence of traumatic brain injury in 1990 and 2019, and percentage changes of age-standardized rates by location, 1990–2019

| Location                         | Incidence                    |                                 |                                                |                  |                                                         |
|----------------------------------|------------------------------|---------------------------------|------------------------------------------------|------------------|---------------------------------------------------------|
|                                  | Numbers<br>(95% UI)          |                                 | Age-standardized rates per 100,000<br>(95% UI) |                  | Percentage change of age-standardized rates<br>(95% UI) |
|                                  | (Year 1990)                  | (Year 2019)                     | (Year 1990)                                    | (Year 2019)      | (Year 1990–Year 2019)                                   |
|                                  | <b>Global</b>                | 18853869 (16215389 to 21806108) | 27160708 (23357251 to 31415052)                | 366 (317 to 421) | 346 (298 to 401)                                        |
| <b>High-income</b>               | 4048422 (3493149 to 4776726) | 4749065 (4069211 to 5570829)    | 431 (369 to 515)                               | 385 (327 to 466) | -10.6% (-12.9% to -8.2%)                                |
| <b>High-income North America</b> | 1120251 (915712 to 1386641)  | 1343020 (1130550 to 1633382)    | 392 (318 to 491)                               | 339 (280 to 416) | -13.7% (-17.1% to -10.0%)                               |
| Canada                           | 126742 (112173 to 143701)    | 208010 (181031 to 239428)       | 441 (390 to 501)                               | 435 (381 to 500) | -1.4% (-5.7% to 2.8%)                                   |
| Greenland                        | 260 (205 to 339)             | 191 (152 to 242)                | 463 (367 to 600)                               | 332 (264 to 426) | -28.4% (-31.8% to -25.4%)                               |
| United States of America         | 993223 (800533 to 1253794)   | 1134798 (933708 to 1399550)     | 388 (310 to 492)                               | 327 (266 to 406) | -15.7% (-19.3% to -11.8%)                               |
| <b>Australasia</b>               | 143293 (121566 to 172676)    | 227584 (194914 to 270506)       | 710 (596 to 863)                               | 729 (613 to 889) | 2.6% (-0.9% to 6.0%)                                    |
| Australia                        | 115278 (97486 to 138505)     | 188496 (161519 to 224241)       | 689 (577 to 838)                               | 712 (595 to 871) | 3.3% (-0.6% to 7.2%)                                    |
| New Zealand                      | 28015 (23858 to 33989)       | 39088 (33612 to 46185)          | 812 (689 to 985)                               | 820 (697 to 985) | 0.9% (-3.7% to 5.9%)                                    |
| <b>High-income Asia Pacific</b>  | 682610 (576222 to 818678)    | 684210 (585181 to 807782)       | 386 (326 to 468)                               | 337 (282 to 414) | -12.8% (-15.8% to -9.6%)                                |
| Brunei Darussalam                | 1159 (995 to 1359)           | 1717 (1474 to 2014)             | 462 (404 to 535)                               | 399 (346 to 466) | -13.5% (-16.8% to -10.4%)                               |
| Japan                            | 439516 (362898 to 539700)    | 401396 (337356 to 483481)       | 344 (282 to 430)                               | 294 (238 to 374) | -14.6% (-17.6% to -11.6%)                               |

1  
2  
3  
4  
5  
6  
7  
8  
9  
10  
11  
12  
13  
14  
15  
16  
17  
18  
19  
20  
21  
22  
23  
24  
25  
26  
27  
28  
29  
30  
31  
32  
33  
34  
35  
36  
37  
38  
39  
40  
41  
42  
43  
44  
45  
46

| Location              | Incidence                    |                              |                                                |                  |                                                         |
|-----------------------|------------------------------|------------------------------|------------------------------------------------|------------------|---------------------------------------------------------|
|                       | Numbers<br>(95% UI)          |                              | Age-standardized rates per 100,000<br>(95% UI) |                  | Percentage change of age-standardized rates<br>(95% UI) |
|                       | (Year 1990)                  | (Year 2019)                  | (Year 1990)                                    | (Year 2019)      | (Year 1990–Year 2019)                                   |
| Republic of Korea     | 229572 (198367 to 266154)    | 261650 (229995 to 301800)    | 510 (445 to 589)                               | 447 (385 to 523) | -12.4% (-17% to -7.5%)                                  |
| Singapore             | 12363 (10572 to 14673)       | 19447 (16786 to 22882)       | 386 (332 to 456)                               | 348 (297 to 415) | -9.7% (-13.1% to -6.0%)                                 |
| <b>Western Europe</b> | 1900129 (1658576 to 2211597) | 2211884 (1887690 to 2613432) | 459 (398 to 536)                               | 413 (352 to 494) | -10.0% (-13.2% to -6.4%)                                |
| Andorra               | 257 (222 to 300)             | 483 (413 to 572)             | 494 (426 to 577)                               | 497 (426 to 591) | 0.7% (-2.7% to 4.2%)                                    |
| Austria               | 45930 (39911 to 53565)       | 49798 (42570 to 58889)       | 538 (464 to 632)                               | 459 (390 to 544) | -14.6% (-18.6% to -10.2%)                               |
| Belgium               | 54836 (47715 to 63954)       | 79891 (68166 to 95248)       | 512 (441 to 601)                               | 545 (461 to 653) | 6.5% (1.7% to 11.3%)                                    |
| Cyprus                | 3322 (2878 to 3882)          | 5975 (5132 to 7037)          | 437 (379 to 512)                               | 440 (374 to 527) | 0.7% (-3.9% to 5.3%)                                    |
| Denmark               | 31336 (27114 to 36415)       | 27541 (23501 to 32541)       | 512 (443 to 598)                               | 410 (345 to 495) | -19.9% (-24.8% to -14.9%)                               |
| Finland               | 35307 (30443 to 41573)       | 40725 (34945 to 47999)       | 662 (569 to 785)                               | 599 (502 to 730) | -9.5% (-13.4% to -5.3%)                                 |
| France                | 355104 (309249 to 412705)    | 437805 (371350 to 520101)    | 552 (479 to 648)                               | 500 (426 to 599) | -9.4% (-13.6% to -5.2%)                                 |
| Germany               | 387145 (335603 to 449564)    | 459776 (391023 to 540848)    | 447 (386 to 524)                               | 425 (361 to 507) | -5.1% (-9.5% to -0.3%)                                  |
| Greece                | 46034 (40112 to 53668)       | 40552 (35287 to 46979)       | 436 (374 to 510)                               | 378 (321 to 452) | -13.1% (-17.3% to -9.2%)                                |
| Iceland               | 1120 (971 to 1320)           | 1547 (1322 to 1823)          | 429 (370 to 506)                               | 410 (347 to 493) | -4.4% (-8.5% to -0.5%)                                  |

1  
2  
3  
4  
5  
6  
7  
8  
9  
10  
11  
12  
13  
14  
15  
16  
17  
18  
19  
20  
21  
22  
23  
24  
25  
26  
27  
28  
29  
30  
31  
32  
33  
34  
35  
36  
37  
38  
39  
40  
41  
42  
43  
44  
45  
46

| Location       | Incidence                 |                           |                                                |                  |                                                         |
|----------------|---------------------------|---------------------------|------------------------------------------------|------------------|---------------------------------------------------------|
|                | Numbers<br>(95% UI)       |                           | Age-standardized rates per 100,000<br>(95% UI) |                  | Percentage change of age-standardized rates<br>(95% UI) |
|                | (Year 1990)               | (Year 2019)               | (Year 1990)                                    | (Year 2019)      | (Year 1990–Year 2019)                                   |
| Ireland        | 15276 (13121 to 17950)    | 20279 (17258 to 24025)    | 420 (360 to 493)                               | 399 (336 to 479) | -5.0% (-9.9% to -0.1%)                                  |
| Israel         | 19147 (16486 to 22607)    | 34415 (29353 to 40786)    | 383 (331 to 452)                               | 363 (309 to 432) | -5.3% (-10.8% to 0.5%)                                  |
| Italy          | 311925 (264451 to 373554) | 293426 (244319 to 355929) | 490 (418 to 581)                               | 377 (319 to 451) | -23.1% (-26.1% to -20.0%)                               |
| Luxembourg     | 2190 (1907 to 2530)       | 3303 (2824 to 3882)       | 545 (471 to 634)                               | 471 (403 to 560) | -13.5% (-18.3% to -9.0%)                                |
| Malta          | 1559 (1335 to 1841)       | 2163 (1841 to 2568)       | 426 (363 to 507)                               | 448 (374 to 543) | 5.1% (1.2% to 9.0%)                                     |
| Monaco         | 78 (63 to 98)             | 99 (79 to 125)            | 275 (215 to 350)                               | 286 (221 to 372) | 4.1% (-0.2% to 8.5%)                                    |
| Netherlands    | 59151 (51424 to 68439)    | 96639 (82271 to 114651)   | 374 (324 to 432)                               | 418 (358 to 495) | 11.8% (6.9% to 16.8%)                                   |
| Norway         | 15876 (12909 to 19920)    | 17945 (14487 to 22608)    | 350 (279 to 445)                               | 305 (239 to 394) | -12.9% (-16.7% to -8.7%)                                |
| Portugal       | 43355 (38038 to 49550)    | 36993 (32073 to 43127)    | 418 (364 to 480)                               | 291 (251 to 340) | -30.4% (-34.4% to -26.4%)                               |
| San Marino     | 71 (56 to 91)             | 95 (75 to 122)            | 305 (239 to 389)                               | 296 (228 to 386) | -2.9% (-8.0% to 2.3%)                                   |
| Spain          | 170769 (149645 to 196464) | 193591 (166251 to 227169) | 427 (372 to 498)                               | 378 (320 to 451) | -11.6% (-17.8% to -4.6%)                                |
| Sweden         | 27855 (22159 to 35604)    | 31091 (24594 to 39906)    | 322 (250 to 420)                               | 290 (223 to 384) | -9.8% (-13.6% to -5.4%)                                 |
| Switzerland    | 52629 (45812 to 61541)    | 59413 (50433 to 70834)    | 675 (583 to 792)                               | 537 (453 to 647) | -20.5% (-24.3% to -16.6%)                               |
| United Kingdom | 218280 (187260 to 257578) | 276411 (233936 to 329374) | 369 (314 to 437)                               | 364 (306 to 440) | -1.4% (-5.3% to 2.1%)                                   |

1  
2  
3  
4  
5  
6  
7  
8  
9  
10  
11  
12  
13  
14  
15  
16  
17  
18  
19  
20  
21  
22  
23  
24  
25  
26  
27  
28  
29  
30  
31  
32  
33  
34  
35  
36  
37  
38  
39  
40  
41  
42  
43  
44  
45  
46

| Location                                                | Incidence                    |                              |                                                |                  |                                                         |
|---------------------------------------------------------|------------------------------|------------------------------|------------------------------------------------|------------------|---------------------------------------------------------|
|                                                         | Numbers<br>(95% UI)          |                              | Age-standardized rates per 100,000<br>(95% UI) |                  | Percentage change of age-standardized rates<br>(95% UI) |
|                                                         | (Year 1990)                  | (Year 2019)                  | (Year 1990)                                    | (Year 2019)      | (Year 1990–Year 2019)                                   |
| <b>Southern Latin America</b>                           | 202139 (174596 to 238831)    | 282368 (245426 to 331894)    | 409 (354 to 481)                               | 420 (363 to 497) | 2.9% (0.0% to 5.8%)                                     |
| Argentina                                               | 133041 (114953 to 157207)    | 185347 (160190 to 218721)    | 404 (350 to 476)                               | 410 (352 to 486) | 1.3% (-2.2% to 4.9%)                                    |
| Chile                                                   | 53588 (46283 to 63533)       | 80432 (70305 to 93851)       | 403 (351 to 474)                               | 435 (376 to 515) | 7.9% (4.3% to 11.9%)                                    |
| Uruguay                                                 | 15502 (13094 to 18725)       | 16575 (14375 to 19433)       | 494 (416 to 601)                               | 471 (405 to 557) | -4.7% (-10.7% to 1.2%)                                  |
| <b>Central Europe, Eastern Europe, and Central Asia</b> | 3448923 (2993981 to 3970637) | 2810851 (2441242 to 3232848) | 814 (706 to 941)                               | 652 (562 to 756) | -20.0% (-21.6% to -18.3%)                               |
| <b>Eastern Europe</b>                                   | 2111822 (1829230 to 2431948) | 1596337 (1380438 to 1851604) | 913 (788 to 1057)                              | 737 (633 to 857) | -19.3% (-20.9% to -17.5%)                               |
| Belarus                                                 | 82407 (72591 to 94495)       | 68634 (60179 to 79328)       | 776 (681 to 890)                               | 691 (601 to 800) | -10.9% (-16.4% to -5.6%)                                |
| Estonia                                                 | 15139 (13274 to 17122)       | 7956 (6969 to 9194)          | 946 (827 to 1070)                              | 593 (515 to 689) | -37.3% (-41.3% to -33.3%)                               |
| Latvia                                                  | 28612 (25205 to 32672)       | 12779 (11230 to 14679)       | 1040 (913 to 1188)                             | 637 (556 to 735) | -38.7% (-42.4% to -34.9%)                               |
| Lithuania                                               | 36467 (32025 to 41606)       | 21385 (18860 to 24407)       | 958 (840 to 1095)                              | 696 (610 to 803) | -27.3% (-31.4% to -23.4%)                               |
| Republic of Moldova                                     | 33134 (29064 to 37940)       | 20142 (17703 to 22874)       | 740 (650 to 845)                               | 535 (467 to 613) | -27.6% (-31.4% to -23.6%)                               |
| Russian Federation                                      | 1460908 (1259645 to 1686720) | 1147613 (987359 to 1334447)  | 946 (812 to 1102)                              | 755 (648 to 882) | -20.3% (-22.5% to -17.9%)                               |



1  
2  
3  
4  
5  
6  
7  
8  
9  
10  
11  
12  
13  
14  
15  
16  
17  
18  
19  
20  
21  
22  
23  
24  
25  
26  
27  
28  
29  
30  
31  
32  
33  
34  
35  
36  
37  
38  
39  
40  
41  
42  
43  
44  
45  
46

| Location               | Incidence                   |                           |                                                |                  |                                                         |
|------------------------|-----------------------------|---------------------------|------------------------------------------------|------------------|---------------------------------------------------------|
|                        | Numbers<br>(95% UI)         |                           | Age-standardized rates per 100,000<br>(95% UI) |                  | Percentage change of age-standardized rates<br>(95% UI) |
|                        | (Year 1990)                 | (Year 2019)               | (Year 1990)                                    | (Year 2019)      | (Year 1990–Year 2019)                                   |
| Ukraine                | 455155 (390046 to 532796)   | 317828 (274671 to 370646) | 850 (726 to 999)                               | 721 (619 to 844) | -15.2% (-17.5% to -12.9%)                               |
| <b>Central Europe</b>  | 1050449 (918891 to 1208699) | 860390 (750474 to 986981) | 846 (738 to 979)                               | 729 (631 to 857) | -13.8% (-16.4% to -11.0%)                               |
| Albania                | 24290 (20268 to 29847)      | 17546 (15114 to 20694)    | 707 (593 to 860)                               | 661 (566 to 787) | -6.5% (-12.7% to -0.1%)                                 |
| Bosnia and Herzegovina | 31248 (26595 to 36809)      | 21054 (18270 to 24541)    | 680 (578 to 801)                               | 664 (567 to 787) | -2.3% (-11.0% to 3.9%)                                  |
| Bulgaria               | 67563 (59061 to 77434)      | 45758 (39781 to 53064)    | 799 (691 to 924)                               | 712 (611 to 836) | -10.8% (-15.5% to -6.8%)                                |
| Croatia                | 45918 (40136 to 52198)      | 42676 (37073 to 49095)    | 920 (800 to 1049)                              | 840 (733 to 973) | -8.7% (-14.3% to -3.1%)                                 |
| Czechia                | 108400 (95345 to 123811)    | 89409 (78044 to 102472)   | 998 (873 to 1148)                              | 800 (691 to 935) | -19.9% (-23.8% to -15.7%)                               |
| Hungary                | 107982 (94821 to 123481)    | 76538 (66601 to 87694)    | 964 (847 to 1105)                              | 721 (622 to 848) | -25.3% (-29.3% to -20.8%)                               |
| Montenegro             | 4648 (4046 to 5422)         | 4534 (3961 to 5250)       | 736 (640 to 859)                               | 727 (628 to 855) | -1.2% (-4.0% to 2.0%)                                   |
| North Macedonia        | 12604 (10778 to 14886)      | 13508 (11694 to 15736)    | 619 (530 to 732)                               | 644 (551 to 760) | 4.0% (-2.9% to 10.2%)                                   |
| Poland                 | 326391 (281406 to 381390)   | 300905 (260824 to 348188) | 847 (730 to 995)                               | 746 (639 to 876) | -11.9% (-14.9% to -8.8%)                                |
| Romania                | 187639 (163095 to 217914)   | 125140 (109393 to 144911) | 798 (690 to 928)                               | 662 (567 to 782) | -17.1% (-20.8% to -13.0%)                               |

1  
2  
3  
4  
5  
6  
7  
8  
9  
10  
11  
12  
13  
14  
15  
16  
17  
18  
19  
20  
21  
22  
23  
24  
25  
26  
27  
28  
29  
30  
31  
32  
33  
34  
35  
36  
37  
38  
39  
40  
41  
42  
43  
44  
45  
46

| Location            | Incidence                 |                           |                                                |                   |                                                         |
|---------------------|---------------------------|---------------------------|------------------------------------------------|-------------------|---------------------------------------------------------|
|                     | Numbers<br>(95% UI)       |                           | Age-standardized rates per 100,000<br>(95% UI) |                   | Percentage change of age-standardized rates<br>(95% UI) |
|                     | (Year 1990)               | (Year 2019)               | (Year 1990)                                    | (Year 2019)       | (Year 1990–Year 2019)                                   |
| Serbia              | 63400 (54940 to 73105)    | 56442 (49158 to 65675)    | 685 (589 to 796)                               | 651 (556 to 771)  | -5.0% (-10.0% to 0.8%)                                  |
| Slovakia            | 48267 (42123 to 55944)    | 45752 (39889 to 52835)    | 899 (782 to 1043)                              | 802 (694 to 936)  | -10.8% (-14.7% to -6.8%)                                |
| Slovenia            | 22098 (19335 to 25416)    | 21129 (18353 to 24397)    | 1079 (935 to 1251)                             | 885 (768 to 1036) | -18% (-22.1% to -13.8%)                                 |
| <b>Central Asia</b> | 286651 (249571 to 332136) | 354124 (307249 to 410664) | 410 (358 to 472)                               | 374 (325 to 433)  | -8.7% (-11.1% to -6.5%)                                 |
| Armenia             | 16547 (14288 to 19180)    | 10102 (8759 to 11727)     | 479 (416 to 554)                               | 342 (295 to 401)  | -28.6% (-32.0% to -25.0%)                               |
| Azerbaijan          | 27908 (24115 to 32533)    | 33547 (28879 to 39351)    | 367 (318 to 424)                               | 323 (278 to 379)  | -12.0% (-16.2% to -7.2%)                                |
| Georgia             | 26165 (22663 to 30364)    | 18034 (15773 to 20821)    | 473 (409 to 549)                               | 502 (433 to 585)  | 6.1% (1.9% to 10.7%)                                    |
| Kazakhstan          | 80723 (70244 to 93033)    | 85299 (74100 to 98232)    | 483 (421 to 555)                               | 461 (400 to 530)  | -4.5% (-8.6% to -0.8%)                                  |
| Kyrgyzstan          | 19195 (16570 to 22255)    | 22763 (19622 to 26463)    | 432 (375 to 498)                               | 343 (297 to 398)  | -20.5% (-24.3% to -16.5%)                               |
| Mongolia            | 8232 (7097 to 9614)       | 15601 (13536 to 18142)    | 383 (334 to 443)                               | 451 (393 to 526)  | 17.8% (13.9% to 21.9%)                                  |
| Tajikistan          | 20222 (17355 to 23810)    | 29009 (24797 to 34252)    | 381 (331 to 442)                               | 298 (258 to 350)  | -21.7% (-24.8% to -18.6%)                               |
| Turkmenistan        | 12629 (10913 to 14680)    | 16375 (14087 to 19322)    | 333 (290 to 384)                               | 316 (272 to 373)  | -5.1% (-9.9% to -0.2%)                                  |

1  
2  
3  
4  
5  
6  
7  
8  
9  
10  
11  
12  
13  
14  
15  
16  
17  
18  
19  
20  
21  
22  
23  
24  
25  
26  
27  
28  
29  
30  
31  
32  
33  
34  
35  
36  
37  
38  
39  
40  
41  
42  
43  
44  
45  
46

| Location                           | Incidence                    |                              |                                                |                  |                                                         |
|------------------------------------|------------------------------|------------------------------|------------------------------------------------|------------------|---------------------------------------------------------|
|                                    | Numbers<br>(95% UI)          |                              | Age-standardized rates per 100,000<br>(95% UI) |                  | Percentage change of age-standardized rates<br>(95% UI) |
|                                    | (Year 1990)                  | (Year 2019)                  | (Year 1990)                                    | (Year 2019)      | (Year 1990–Year 2019)                                   |
| Uzbekistan                         | 75031 (64631 to 87357)       | 123394 (106270 to 143651)    | 354 (308 to 408)                               | 358 (311 to 415) | 1.3% (-2.8% to 4.8%)                                    |
| <b>Latin America and Caribbean</b> | 1224624 (1025961 to 1471278) | 1601404 (1357254 to 1904769) | 311 (264 to 370)                               | 273 (231 to 324) | -12.4% (-16.0% to -9.8%)                                |
| <b>Central Latin America</b>       | 614132 (514302 to 738706)    | 765677 (649993 to 907182)    | 369 (315 to 437)                               | 306 (260 to 363) | -17.2% (-21.4% to -14.1%)                               |
| Colombia                           | 157598 (136622 to 190358)    | 162401 (141821 to 184268)    | 481 (423 to 569)                               | 341 (297 to 389) | -29.1% (-38.2% to -23.2%)                               |
| Costa Rica                         | 10257 (8870 to 11945)        | 16510 (14473 to 18827)       | 351 (307 to 401)                               | 352 (306 to 402) | 0.4% (-3.6% to 4.0%)                                    |
| El Salvador                        | 26398 (20821 to 37523)       | 23137 (20203 to 26687)       | 483 (390 to 668)                               | 366 (321 to 422) | -24.1% (-44.4% to -8.2%)                                |
| Guatemala                          | 30702 (24868 to 40208)       | 59797 (51515 to 70653)       | 383 (318 to 486)                               | 340 (296 to 396) | -11.3% (-30.7% to 1.4%)                                 |
| Honduras                           | 15003 (12781 to 17528)       | 31620 (27148 to 36947)       | 306 (267 to 351)                               | 321 (279 to 372) | 4.7% (-0.1% to 9.8%)                                    |
| Mexico                             | 279371 (219058 to 358076)    | 339717 (272861 to 424935)    | 320 (257 to 404)                               | 271 (219 to 339) | -15.4% (-17.4% to -13.1%)                               |
| Nicaragua                          | 11712 (9996 to 13780)        | 17213 (14760 to 20240)       | 289 (251 to 331)                               | 269 (233 to 313) | -6.9% (-12% to -2.4%)                                   |
| Panama                             | 7790 (6726 to 8947)          | 12749 (11095 to 14736)       | 325 (285 to 371)                               | 306 (266 to 354) | -5.9% (-10.2% to -1.9%)                                 |
| Venezuela (Bolivarian Republic of) | 75302 (64723 to 87960)       | 102532 (89076 to 118625)     | 394 (343 to 452)                               | 371 (321 to 430) | -6.0% (-11.2% to -0.8%)                                 |
| <b>Andean Latin America</b>        | 103322 (87106 to 127542)     | 154311 (135039 to 178003)    | 268 (229 to 325)                               | 243 (213 to 279) | -9.5% (-23.6% to 0.1%)                                  |

1  
2  
3  
4  
5  
6  
7  
8  
9  
10  
11  
12  
13  
14  
15  
16  
17  
18  
19  
20  
21  
22  
23  
24  
25  
26  
27  
28  
29  
30  
31  
32  
33  
34  
35  
36  
37  
38  
39  
40  
41  
42  
43  
44  
45  
46

| Location                         | Incidence                |                           |                                                |                  |                                                         |
|----------------------------------|--------------------------|---------------------------|------------------------------------------------|------------------|---------------------------------------------------------|
|                                  | Numbers<br>(95% UI)      |                           | Age-standardized rates per 100,000<br>(95% UI) |                  | Percentage change of age-standardized rates<br>(95% UI) |
|                                  | (Year 1990)              | (Year 2019)               | (Year 1990)                                    | (Year 2019)      | (Year 1990–Year 2019)                                   |
| Bolivia (Plurinational State of) | 14398 (12480 to 16778)   | 26248 (22834 to 30390)    | 229 (201 to 263)                               | 224 (196 to 257) | -2.2% (-6.1% to 1.7%)                                   |
| Ecuador                          | 25018 (21761 to 28749)   | 49398 (43363 to 56599)    | 255 (224 to 289)                               | 282 (248 to 322) | 10.8% (7.0% to 14.7%)                                   |
| Peru                             | 63906 (51592 to 85784)   | 78666 (68391 to 91205)    | 286 (235 to 378)                               | 230 (201 to 267) | -19.5% (-38.6% to -5.3%)                                |
| <b>Caribbean</b>                 | 104915 (91947 to 119513) | 155545 (137052 to 177959) | 299 (263 to 338)                               | 325 (286 to 373) | 8.5% (4.6% to 12.2%)                                    |
| Antigua and Barbuda              | 168 (143 to 201)         | 250 (216 to 296)          | 268 (229 to 319)                               | 287 (246 to 341) | 7.1% (2.8% to 11.5%)                                    |
| Bahamas                          | 725 (625 to 828)         | 1087 (951 to 1240)        | 277 (241 to 313)                               | 289 (253 to 330) | 4.4% (-0.7% to 9.4%)                                    |
| Barbados                         | 641 (557 to 737)         | 749 (659 to 853)          | 244 (211 to 280)                               | 255 (222 to 295) | 4.8% (-0.3% to 9.4%)                                    |
| Belize                           | 554 (471 to 658)         | 1314 (1132 to 1524)       | 286 (246 to 331)                               | 314 (273 to 362) | 9.8% (0.0% to 17.5%)                                    |
| Bermuda                          | 150 (121 to 184)         | 140 (114 to 174)          | 250 (201 to 308)                               | 243 (193 to 311) | -2.8% (-9.4% to 5.2%)                                   |
| Cuba                             | 41259 (36610 to 46402)   | 54214 (47783 to 62107)    | 372 (331 to 417)                               | 407 (357 to 465) | 9.5% (3.0% to 16.6%)                                    |
| Dominica                         | 186 (162 to 213)         | 182 (160 to 208)          | 247 (216 to 281)                               | 264 (230 to 303) | 6.8% (2.6% to 10.9%)                                    |
| Dominican Republic               | 18517 (15908 to 21389)   | 36823 (31858 to 42425)    | 253 (220 to 288)                               | 334 (290 to 382) | 32.2% (26.3% to 38%)                                    |
| Grenada                          | 217 (188 to 253)         | 302 (264 to 352)          | 251 (218 to 291)                               | 294 (255 to 343) | 17.3% (12.4% to 22.7%)                                  |
| Guyana                           | 2157 (1897 to 2469)      | 2551 (2245 to 2910)       | 287 (254 to 325)                               | 333 (294 to 379) | 16.0% (12.5% to 19.9%)                                  |
| Haiti                            | 15742 (13525 to 18796)   | 30690 (26357 to 36272)    | 250 (216 to 295)                               | 249 (216 to 291) | -0.4% (-3.1% to 2.5%)                                   |
| Jamaica                          | 5951 (5034 to 7031)      | 7066 (6116 to 8286)       | 242 (207 to 283)                               | 248 (214 to 290) | 2.4% (-2.1% to 6.7%)                                    |
| Puerto Rico                      | 10006 (8277 to 12091)    | 8553 (7022 to 10417)      | 274 (226 to 331)                               | 254 (205 to 317) | -7.2% (-13.7% to -0.3%)                                 |

1  
2  
3  
4  
5  
6  
7  
8  
9  
10  
11  
12  
13  
14  
15  
16  
17  
18  
19  
20  
21  
22  
23  
24  
25  
26  
27  
28  
29  
30  
31  
32  
33  
34  
35  
36  
37  
38  
39  
40  
41  
42  
43  
44  
45  
46

| Location                                      | Incidence                    |                              |                                                |                  |                                                         |
|-----------------------------------------------|------------------------------|------------------------------|------------------------------------------------|------------------|---------------------------------------------------------|
|                                               | Numbers<br>(95% UI)          |                              | Age-standardized rates per 100,000<br>(95% UI) |                  | Percentage change of age-standardized rates<br>(95% UI) |
|                                               | (Year 1990)                  | (Year 2019)                  | (Year 1990)                                    | (Year 2019)      | (Year 1990–Year 2019)                                   |
| Saint Kitts and Nevis                         | 108 (84 to 139)              | 153 (122 to 195)             | 259 (204 to 330)                               | 266 (210 to 339) | 5.1% (-0.4% to 10.4%)                                   |
| Saint Lucia                                   | 369 (319 to 425)             | 491 (432 to 558)             | 268 (234 to 304)                               | 282 (246 to 324) | 2.7% (-2.8% to 8.0%)                                    |
| Saint Vincent and the Grenadines              | 271 (234 to 316)             | 306 (269 to 353)             | 243 (212 to 279)                               | 270 (237 to 313) | 11.1% (6.9% to 15.5%)                                   |
| Suriname                                      | 991 (857 to 1143)            | 1568 (1375 to 1790)          | 251 (218 to 287)                               | 275 (240 to 315) | 9.3% (4.7% to 14.4%)                                    |
| Trinidad and Tobago                           | 3132 (2698 to 3579)          | 3596 (3168 to 4101)          | 259 (224 to 294)                               | 264 (230 to 303) | 2.1% (-6.3% to 9.1%)                                    |
| United States Virgin Islands                  | 276 (225 to 344)             | 240 (196 to 296)             | 260 (213 to 323)                               | 245 (196 to 308) | -6.0% (-11.8% to -0.2%)                                 |
| <b>Tropical Latin America</b>                 | 402255 (323726 to 499391)    | 525871 (427539 to 647705)    | 261 (213 to 323)                               | 231 (187 to 286) | -11.5% (-14.6% to -8.6%)                                |
| Brazil                                        | 390799 (313409 to 486773)    | 504767 (408622 to 624274)    | 260 (211 to 323)                               | 229 (185 to 284) | -12.1% (-15.2% to -9.2%)                                |
| Paraguay                                      | 11457 (9813 to 13509)        | 21104 (18266 to 24583)       | 285 (248 to 330)                               | 300 (261 to 347) | 5.3% (1.4% to 9.3%)                                     |
| <b>Southeast Asia, East Asia, and Oceania</b> | 3011172 (2496898 to 3614257) | 5095208 (4280678 to 6104063) | 179 (150 to 214)                               | 222 (186 to 265) | 23.6% (19.5% to 27.7%)                                  |
| <b>East Asia</b>                              | 1777529 (1457606 to 2180900) | 3412591 (2824709 to 4137435) | 146 (120 to 178)                               | 207 (170 to 253) | 41.5% (34.7% to 48.6%)                                  |
| China                                         | 1691121 (1376509 to 2086871) | 3310055 (2727619 to 4021599) | 144 (118 to 176)                               | 208 (170 to 255) | 44.6% (37.5% to 52.0%)                                  |
| Democratic People's Republic of Korea         | 33855 (29762 to 39003)       | 47331 (41187 to 53742)       | 166 (146 to 190)                               | 166 (145 to 188) | 0.1% (-5.0% to 5.7%)                                    |
| Taiwan (Province of China)                    | 52553 (46334 to 59737)       | 55205 (48911 to 61794)       | 261 (232 to 296)                               | 193 (170 to 217) | -26.4% (-30.1% to -22.3%)                               |
| <b>Southeast Asia</b>                         | 1221270 (1035226 to 1428941) | 1653210 (1430159 to 1907523) | 270 (232 to 312)                               | 246 (213 to 284) | -8.8% (-13.7% to -5.1%)                                 |

1  
2  
3  
4  
5  
6  
7  
8  
9  
10  
11  
12  
13  
14  
15  
16  
17  
18  
19  
20  
21  
22  
23  
24  
25  
26  
27  
28  
29  
30  
31  
32  
33  
34  
35  
36  
37  
38  
39  
40  
41  
42  
43  
44  
45  
46

| Location                         | Incidence                 |                           |                                                |                  |                                                         |
|----------------------------------|---------------------------|---------------------------|------------------------------------------------|------------------|---------------------------------------------------------|
|                                  | Numbers<br>(95% UI)       |                           | Age-standardized rates per 100,000<br>(95% UI) |                  | Percentage change of age-standardized rates<br>(95% UI) |
|                                  | (Year 1990)               | (Year 2019)               | (Year 1990)                                    | (Year 2019)      | (Year 1990–Year 2019)                                   |
| Cambodia                         | 23951 (20415 to 28766)    | 43107 (37751 to 49401)    | 252 (218 to 293)                               | 276 (242 to 313) | 9.5% (-2.4% to 18.5%)                                   |
| Indonesia                        | 405050 (326221 to 499990) | 491104 (399909 to 601380) | 220 (180 to 269)                               | 189 (155 to 232) | -14.0% (-16.2% to -12.0%)                               |
| Lao People's Democratic Republic | 11572 (9505 to 15264)     | 16638 (14469 to 19086)    | 292 (245 to 374)                               | 239 (209 to 271) | -18.4% (-34.2% to -8.4%)                                |
| Malaysia                         | 46852 (40411 to 53545)    | 96768 (84367 to 110145)   | 284 (247 to 321)                               | 308 (268 to 349) | 8.6% (3.9% to 13.6%)                                    |
| Maldives                         | 420 (362 to 485)          | 1059 (923 to 1218)        | 211 (185 to 240)                               | 216 (188 to 248) | 2.3% (-2.6% to 7.7%)                                    |
| Mauritius                        | 2048 (1690 to 2468)       | 2646 (2190 to 3174)       | 183 (152 to 219)                               | 203 (167 to 245) | 10.8% (4.7% to 17.7%)                                   |
| Myanmar                          | 111688 (97238 to 129136)  | 136589 (119324 to 157635) | 281 (246 to 321)                               | 257 (224 to 297) | -8.6% (-12.9% to -4.6%)                                 |
| Philippines                      | 178811 (152160 to 209683) | 267241 (230496 to 309556) | 294 (252 to 341)                               | 246 (213 to 283) | -16.3% (-23.3% to -10.9%)                               |
| Seychelles                       | 149 (122 to 181)          | 223 (184 to 267)          | 205 (170 to 248)                               | 213 (174 to 257) | 3.7% (-1.4% to 9.1%)                                    |
| Sri Lanka                        | 85269 (60250 to 140083)   | 66466 (58700 to 75850)    | 489 (356 to 775)                               | 297 (262 to 338) | -39.2% (-60.6% to -18%)                                 |
| Thailand                         | 185784 (161287 to 212248) | 206998 (181911 to 233050) | 324 (284 to 367)                               | 273 (240 to 309) | -15.7% (-20% to -11.4%)                                 |
| Timor-Leste                      | 2892 (2003 to 4865)       | 2700 (2342 to 3110)       | 359 (258 to 575)                               | 216 (189 to 246) | -39.8% (-62% to -16.5%)                                 |
| Viet Nam                         | 165161 (142941 to 189272) | 319503 (279955 to 361856) | 264 (231 to 300)                               | 330 (290 to 374) | 24.8% (19.2% to 30.6%)                                  |
| Oceania                          | 12373 (10780 to 14206)    | 29408 (25561 to 33939)    | 213 (186 to 242)                               | 244 (214 to 280) | 14.8% (11.1% to 18.8%)                                  |
| American Samoa                   | 87 (71 to 106)            | 91 (75 to 111)            | 187 (155 to 227)                               | 168 (138 to 203) | -10.3% (-14.0% to -5.9%)                                |

1  
2  
3  
4  
5  
6  
7  
8  
9  
10  
11  
12  
13  
14  
15  
16  
17  
18  
19  
20  
21  
22  
23  
24  
25  
26  
27  
28  
29  
30  
31  
32  
33  
34  
35  
36  
37  
38  
39  
40  
41  
42  
43  
44  
45  
46

| Location                            | Incidence                    |                              |                                                |                   |                                                         |
|-------------------------------------|------------------------------|------------------------------|------------------------------------------------|-------------------|---------------------------------------------------------|
|                                     | Numbers<br>(95% UI)          |                              | Age-standardized rates per 100,000<br>(95% UI) |                   | Percentage change of age-standardized rates<br>(95% UI) |
|                                     | (Year 1990)                  | (Year 2019)                  | (Year 1990)                                    | (Year 2019)       | (Year 1990–Year 2019)                                   |
| Cook Islands                        | 41 (34 to 50)                | 35 (29 to 42)                | 229 (190 to 273)                               | 192 (156 to 234)  | -16.3% (-22.5% to -9.8%)                                |
| Fiji                                | 1296 (1125 to 1490)          | 1638 (1431 to 1875)          | 177 (155 to 200)                               | 184 (161 to 210)  | 4.2% (0.7% to 7.8%)                                     |
| Guam                                | 275 (225 to 332)             | 298 (247 to 363)             | 198 (164 to 237)                               | 176 (145 to 214)  | -11.2% (-15.7% to -6.9%)                                |
| Kiribati                            | 108 (94 to 124)              | 179 (155 to 207)             | 150 (132 to 170)                               | 155 (134 to 176)  | 3.1% (-0.8% to 7.4%)                                    |
| Marshall Islands                    | 81 (71 to 93)                | 117 (102 to 134)             | 208 (182 to 235)                               | 217 (190 to 247)  | 4.3% (1.0% to 7.9%)                                     |
| Micronesia (Federated States of)    | 193 (168 to 220)             | 220 (191 to 253)             | 211 (184 to 239)                               | 227 (198 to 259)  | 7.6% (3.8% to 11.6%)                                    |
| Nauru                               | 19 (15 to 23)                | 20 (17 to 25)                | 195 (162 to 234)                               | 199 (164 to 240)  | 1.7% (-2.4% to 5.9%)                                    |
| Niue                                | 4 (3 to 5)                   | 3 (2 to 4)                   | 176 (146 to 214)                               | 176 (145 to 215)  | 0.1% (-4.3% to 5.0%)                                    |
| Northern Mariana Islands            | 115 (94 to 139)              | 88 (73 to 108)               | 244 (203 to 294)                               | 205 (168 to 250)  | -16.1% (-20.5% to -10.7%)                               |
| Palau                               | 37 (30 to 45)                | 46 (38 to 56)                | 237 (196 to 288)                               | 249 (205 to 303)  | 4.8% (0.9% to 9.0%)                                     |
| Papua New Guinea                    | 7935 (6896 to 9122)          | 22541 (19552 to 26063)       | 221 (193 to 250)                               | 259 (227 to 298)  | 17.5% (12.8% to 22.3%)                                  |
| Samoa                               | 365 (316 to 423)             | 459 (398 to 531)             | 238 (208 to 271)                               | 232 (202 to 265)  | -2.8% (-10.4% to 3.5%)                                  |
| Solomon Islands                     | 698 (607 to 809)             | 1541 (1334 to 1813)          | 246 (216 to 283)                               | 270 (235 to 315)  | 9.9% (5.7% to 14.3%)                                    |
| Tokelau                             | 2 (2 to 3)                   | 2 (2 to 3)                   | 160 (133 to 193)                               | 167 (138 to 203)  | 4.3% (0.1% to 9.2%)                                     |
| Tonga                               | 168 (147 to 192)             | 176 (153 to 203)             | 191 (168 to 216)                               | 180 (156 to 206)  | -5.7% (-10.8% to -0.4%)                                 |
| Tuvalu                              | 15 (12 to 18)                | 20 (17 to 24)                | 162 (135 to 195)                               | 171 (142 to 208)  | 8.3% (4.6% to 12.0%)                                    |
| Vanuatu                             | 250 (218 to 286)             | 544 (472 to 630)             | 182 (159 to 205)                               | 197 (172 to 225)  | 5.5% (1.0% to 10.9%)                                    |
| <b>North Africa and Middle East</b> | 1282547 (1094820 to 1500156) | 1911495 (1624871 to 2305162) | 373 (320 to 432)                               | 319 (272 to 382)  | -14.5% (-24.8% to -4.0%)                                |
| <b>North Africa and Middle East</b> | 1282547 (1094820 to 1500156) | 1911495 (1624871 to 2305162) | 373 (320 to 432)                               | 319 (272 to 382)  | -14.5% (-24.8% to -4.0%)                                |
| Afghanistan                         | 34710 (26794 to 50241)       | 172744 (114294 to 298507)    | 302 (239 to 418)                               | 572 (347 to 1015) | 89.2% (38.3% to 157.5%)                                 |

1  
2  
3  
4  
5  
6  
7  
8  
9  
10  
11  
12  
13  
14  
15  
16  
17  
18  
19  
20  
21  
22  
23  
24  
25  
26  
27  
28  
29  
30  
31  
32  
33  
34  
35  
36  
37  
38  
39  
40  
41  
42  
43  
44  
45  
46

| Location                   | Incidence                 |                           |                                                |                  |                                                         |
|----------------------------|---------------------------|---------------------------|------------------------------------------------|------------------|---------------------------------------------------------|
|                            | Numbers<br>(95% UI)       |                           | Age-standardized rates per 100,000<br>(95% UI) |                  | Percentage change of age-standardized rates<br>(95% UI) |
|                            | (Year 1990)               | (Year 2019)               | (Year 1990)                                    | (Year 2019)      | (Year 1990–Year 2019)                                   |
| Algeria                    | 75841 (65370 to 88606)    | 109818 (95425 to 126366)  | 306 (268 to 349)                               | 266 (231 to 306) | -13.1% (-17.2% to -8.7%)                                |
| Bahrain                    | 1347 (1159 to 1554)       | 3605 (3131 to 4160)       | 261 (227 to 297)                               | 259 (224 to 299) | -0.7% (-5.5% to 4.4%)                                   |
| Egypt                      | 119851 (104161 to 138952) | 222467 (191763 to 257387) | 218 (191 to 250)                               | 230 (199 to 264) | 5.3% (0.5% to 10.6%)                                    |
| Iran (Islamic Republic of) | 481149 (369653 to 629092) | 224769 (194553 to 259552) | 832 (639 to 1097)                              | 267 (232 to 309) | -67.8% (-75.7% to -58%)                                 |
| Iraq                       | 69506 (57147 to 88661)    | 140292 (119415 to 166064) | 395 (330 to 493)                               | 321 (276 to 376) | -18.8% (-27.5% to -12.2%)                               |
| Jordan                     | 8955 (7700 to 10433)      | 26039 (22338 to 30461)    | 237 (208 to 272)                               | 223 (194 to 259) | -5.9% (-10.0% to -1.2%)                                 |
| Kuwait                     | 12821 (8346 to 22077)     | 12537 (10826 to 14617)    | 670 (448 to 1137)                              | 280 (243 to 324) | -58.2% (-76.0% to -37.2%)                               |
| Lebanon                    | 13842 (10371 to 21079)    | 12783 (11084 to 14829)    | 418 (319 to 615)                               | 248 (215 to 288) | -40.8% (-59.4% to -23.5%)                               |
| Libya                      | 11860 (10255 to 13694)    | 26776 (22306 to 34151)    | 295 (258 to 336)                               | 385 (320 to 494) | 30.4% (12.6% to 66.0%)                                  |
| Morocco                    | 70981 (61333 to 82278)    | 102188 (88863 to 118831)  | 281 (245 to 323)                               | 286 (250 to 331) | 1.7% (-2.5% to 5.9%)                                    |
| Oman                       | 7324 (6311 to 8515)       | 17119 (14700 to 19857)    | 416 (362 to 477)                               | 386 (336 to 438) | -7.2% (-11.9% to -2.0%)                                 |
| Palestine                  | 8161 (5922 to 12983)      | 12633 (10861 to 14734)    | 373 (278 to 561)                               | 255 (221 to 296) | -31.7% (-53.3% to -12.3%)                               |
| Qatar                      | 1979 (1696 to 2305)       | 11890 (10081 to 14150)    | 415 (361 to 477)                               | 374 (325 to 434) | -9.9% (-14.5% to -5.1%)                                 |
| Saudi Arabia               | 74970 (64447 to 88788)    | 242222 (207011 to 286739) | 500 (435 to 581)                               | 628 (542 to 735) | 25.6% (19.3% to 32.2%)                                  |
| Sudan                      | 59258 (38878 to 101160)   | 69744 (56092 to 87454)    | 289 (195 to 484)                               | 172 (141 to 213) | -40.5% (-64.4% to -16.4%)                               |



1  
2  
3  
4  
5  
6  
7  
8  
9  
10  
11  
12  
13  
14  
15  
16  
17  
18  
19  
20  
21  
22  
23  
24  
25  
26  
27  
28  
29  
30  
31  
32  
33  
34  
35  
36  
37  
38  
39  
40  
41  
42  
43  
44  
45  
46

| Location             | Incidence                    |                               |                                                |                  |                                                         |
|----------------------|------------------------------|-------------------------------|------------------------------------------------|------------------|---------------------------------------------------------|
|                      | Numbers<br>(95% UI)          |                               | Age-standardized rates per 100,000<br>(95% UI) |                  | Percentage change of age-standardized rates<br>(95% UI) |
|                      | (Year 1990)                  | (Year 2019)                   | (Year 1990)                                    | (Year 2019)      | (Year 1990–Year 2019)                                   |
| Syrian Arab Republic | 27298 (23322 to 32182)       | 52830 (39544 to 76766)        | 212 (184 to 244)                               | 414 (297 to 626) | 95.4% (43.6% to 192.7%)                                 |
| Tunisia              | 22252 (19108 to 26018)       | 31759 (27629 to 36591)        | 265 (229 to 306)                               | 274 (238 to 317) | 3.3% (-1.0% to 8.1%)                                    |
| Turkey               | 141441 (122511 to 163565)    | 219256 (191556 to 254991)     | 236 (205 to 270)                               | 265 (232 to 308) | 12.5% (5.2% to 20.0%)                                   |
| United Arab Emirates | 6539 (5617 to 7609)          | 33183 (28455 to 38552)        | 357 (312 to 410)                               | 330 (286 to 378) | -7.6% (-11.2% to -3.8%)                                 |
| Yemen                | 31601 (27106 to 36896)       | 164898 (108336 to 287669)     | 250 (218 to 286)                               | 496 (338 to 841) | 98.1% (35.1% to 236.3%)                                 |
| South Asia           | 4300736 (3694519 to 4984977) | 8775756 (7523034 to 10153936) | 450 (388 to 515)                               | 508 (438 to 587) | 13.1% (9.7% to 16.1%)                                   |
| South Asia           | 4300736 (3694519 to 4984977) | 8775756 (7523034 to 10153936) | 450 (388 to 515)                               | 508 (438 to 587) | 13.1% (9.7% to 16.1%)                                   |
| Bangladesh           | 278929 (238243 to 322617)    | 498953 (428415 to 575427)     | 278 (241 to 319)                               | 308 (266 to 353) | 10.8% (6.4% to 15.7%)                                   |
| Bhutan               | 1970 (1681 to 2296)          | 3152 (2726 to 3617)           | 348 (302 to 397)                               | 419 (366 to 478) | 20.5% (14.9% to 26.4%)                                  |
| India                | 3699867 (3165789 to 4285733) | 7464821 (6383527 to 8667434)  | 499 (431 to 574)                               | 554 (476 to 641) | 11.1% (7.3% to 14.3%)                                   |
| Nepal                | 58632 (50978 to 67502)       | 108778 (94776 to 125460)      | 338 (296 to 384)                               | 369 (323 to 422) | 9.2% (5.7% to 12.4%)                                    |
| Pakistan             | 261338 (223563 to 302917)    | 700052 (592408 to 822394)     | 266 (229 to 305)                               | 337 (287 to 390) | 26.7% (22.8% to 30.3%)                                  |
| Sub-Saharan Africa   | 1537445 (1146016 to 2275614) | 2216929 (1852407 to 2642459)  | 329 (256 to 461)                               | 231 (195 to 272) | -29.7% (-47.0% to -15.2%)                               |

1  
2  
3  
4  
5  
6  
7  
8  
9  
10  
11  
12  
13  
14  
15  
16  
17  
18  
19  
20  
21  
22  
23  
24  
25  
26  
27  
28  
29  
30  
31  
32  
33  
34  
35  
36  
37  
38  
39  
40  
41  
42  
43  
44  
45  
46

| Location                           | Incidence                 |                            |                                                |                  |                                                         |
|------------------------------------|---------------------------|----------------------------|------------------------------------------------|------------------|---------------------------------------------------------|
|                                    | Numbers<br>(95% UI)       |                            | Age-standardized rates per 100,000<br>(95% UI) |                  | Percentage change of age-standardized rates<br>(95% UI) |
|                                    | (Year 1990)               | (Year 2019)                | (Year 1990)                                    | (Year 2019)      | (Year 1990–Year 2019)                                   |
| <b>Southern Sub-Saharan Africa</b> | 115447 (93813 to 140794)  | 147127 (120571 to 177386)  | 233 (192 to 280)                               | 190 (157 to 230) | -18.4% (-21.4% to -15.8%)                               |
| Botswana                           | 2191 (1767 to 2682)       | 4653 (3836 to 5610)        | 175 (145 to 211)                               | 202 (168 to 244) | 15.3% (9.5% to 20.7%)                                   |
| Eswatini                           | 1290 (1050 to 1590)       | 2178 (1798 to 2635)        | 175 (146 to 211)                               | 199 (165 to 238) | 13.4% (8.6% to 18.4%)                                   |
| Lesotho                            | 2845 (2325 to 3480)       | 4350 (3601 to 5251)        | 164 (137 to 198)                               | 212 (177 to 254) | 29.1% (22.4% to 35.8%)                                  |
| Namibia                            | 2572 (2114 to 3133)       | 4813 (3964 to 5787)        | 201 (168 to 239)                               | 210 (174 to 251) | 4.7% (0.9% to 9.1%)                                     |
| South Africa                       | 91918 (74258 to 112133)   | 108940 (88449 to 131433)   | 258 (210 to 311)                               | 195 (159 to 235) | -24.4% (-27.7% to -21.5%)                               |
| Zimbabwe                           | 14631 (11818 to 17980)    | 22193 (18083 to 27027)     | 161 (135 to 192)                               | 160 (133 to 193) | -0.7% (-6.1% to 7.4%)                                   |
| <b>Western Sub-Saharan Africa</b>  | 382027 (311502 to 464214) | 911247 (745370 to 1110360) | 224 (187 to 269)                               | 233 (194 to 277) | 3.6% (-0.4% to 6.6%)                                    |
| Benin                              | 9289 (7594 to 11299)      | 25317 (20605 to 30904)     | 228 (189 to 275)                               | 238 (197 to 287) | 4.2% (0.5% to 8.8%)                                     |
| Burkina Faso                       | 17138 (13980 to 20844)    | 51473 (42015 to 62572)     | 219 (181 to 263)                               | 271 (224 to 327) | 23.9% (16.6% to 35.9%)                                  |
| Cabo Verde                         | 609 (496 to 741)          | 1224 (1005 to 1456)        | 184 (152 to 221)                               | 220 (182 to 260) | 19.3% (14.5% to 24.5%)                                  |
| Cameroon                           | 22582 (18328 to 27491)    | 72858 (58673 to 89401)     | 261 (215 to 315)                               | 290 (239 to 352) | 11.3% (5.6% to 18.6%)                                   |
| Chad                               | 13637 (10288 to 19609)    | 32204 (26198 to 38993)     | 250 (194 to 347)                               | 241 (201 to 289) | -3.7% (-23.2% to 10.8%)                                 |
| Côte d'Ivoire                      | 24499 (20017 to 29733)    | 54433 (44435 to 65820)     | 246 (205 to 295)                               | 245 (203 to 294) | -0.3% (-3.9% to 3.6%)                                   |
| Gambia                             | 1659 (1344 to 2036)       | 4001 (3257 to 4890)        | 196 (163 to 236)                               | 209 (173 to 250) | 6.3% (3.1% to 9.8%)                                     |

1  
2  
3  
4  
5  
6  
7  
8  
9  
10  
11  
12  
13  
14  
15  
16  
17  
18  
19  
20  
21  
22  
23  
24  
25  
26  
27  
28  
29  
30  
31  
32  
33  
34  
35  
36  
37  
38  
39  
40  
41  
42  
43  
44  
45  
46

| Location                          | Incidence                  |                            |                                                |                  |                                                         |
|-----------------------------------|----------------------------|----------------------------|------------------------------------------------|------------------|---------------------------------------------------------|
|                                   | Numbers<br>(95% UI)        |                            | Age-standardized rates per 100,000<br>(95% UI) |                  | Percentage change of age-standardized rates<br>(95% UI) |
|                                   | (Year 1990)                | (Year 2019)                | (Year 1990)                                    | (Year 2019)      | (Year 1990–Year 2019)                                   |
| Ghana                             | 31030 (25268 to 37891)     | 82612 (67111 to 100632)    | 235 (193 to 284)                               | 281 (230 to 341) | 19.5% (15.0% to 24.4%)                                  |
| Guinea                            | 11807 (9667 to 14382)      | 26064 (21153 to 31734)     | 214 (178 to 256)                               | 244 (201 to 293) | 13.7% (8.8% to 18.5%)                                   |
| Guinea-Bissau                     | 2419 (1965 to 2966)        | 4638 (3724 to 5718)        | 273 (224 to 332)                               | 271 (220 to 329) | -0.7% (-4.6% to 3.2%)                                   |
| Liberia                           | 19837 (8502 to 45461)      | 8013 (6513 to 9752)        | 987 (444 to 2198)                              | 190 (157 to 229) | -80.7% (-91.5% to -56.7%)                               |
| Mali                              | 18839 (14989 to 24426)     | 44120 (35428 to 55449)     | 244 (197 to 309)                               | 236 (193 to 290) | -3.3% (-9.3% to 1.5%)                                   |
| Mauritania                        | 5543 (4481 to 6780)        | 9567 (7760 to 11677)       | 304 (247 to 368)                               | 263 (216 to 320) | -13.2% (-17.7% to -8.6%)                                |
| Niger                             | 15116 (12366 to 18488)     | 41182 (33534 to 50198)     | 219 (182 to 262)                               | 217 (181 to 258) | -0.9% (-4.8% to 2.7%)                                   |
| Nigeria                           | 159087 (129032 to 196310)  | 389966 (316281 to 480854)  | 198 (163 to 238)                               | 212 (175 to 257) | 7.3% (3.5% to 13.0%)                                    |
| Sao Tome and Principe             | 232 (190 to 285)           | 463 (378 to 558)           | 210 (175 to 252)                               | 247 (204 to 295) | 17.6% (13.2% to 22.4%)                                  |
| Senegal                           | 14134 (11507 to 17228)     | 28943 (23477 to 35172)     | 215 (179 to 257)                               | 218 (179 to 261) | 1.4% (-4.0% to 6.0%)                                    |
| Sierra Leone                      | 6798 (5591 to 8288)        | 16290 (13229 to 19977)     | 209 (172 to 252)                               | 226 (187 to 274) | 8.1% (3.7% to 12.2%)                                    |
| Togo                              | 7757 (6242 to 9634)        | 17866 (14519 to 21873)     | 237 (195 to 289)                               | 244 (201 to 296) | 2.8% (-1.3% to 6.4%)                                    |
| <b>Eastern Sub-Saharan Africa</b> | 915689 (614243 to 1558449) | 904591 (757646 to 1080346) | 491 (344 to 789)                               | 246 (209 to 286) | -49.8% (-67.5% to -30.4%)                               |
| Burundi                           | 14420 (12357 to 16712)     | 29122 (24824 to 33800)     | 304 (264 to 348)                               | 281 (243 to 322) | -7.6% (-10.8% to -4.0%)                                 |
| Comoros                           | 1286 (1046 to 1588)        | 2099 (1712 to 2554)        | 304 (249 to 371)                               | 302 (248 to 365) | -0.6% (-5.0% to 4.0%)                                   |
| Djibouti                          | 1450 (1119 to 2040)        | 2864 (2318 to 3491)        | 317 (251 to 421)                               | 255 (211 to 310) | -19.5% (-35.4% to -7.4%)                                |

1  
2  
3  
4  
5  
6  
7  
8  
9  
10  
11  
12  
13  
14  
15  
16  
17  
18  
19  
20  
21  
22  
23  
24  
25  
26  
27  
28  
29  
30  
31  
32  
33  
34  
35  
36  
37  
38  
39  
40  
41  
42  
43  
44  
45  
46

| Location                    | Incidence                  |                           |                                                |                  |                                                         |
|-----------------------------|----------------------------|---------------------------|------------------------------------------------|------------------|---------------------------------------------------------|
|                             | Numbers<br>(95% UI)        |                           | Age-standardized rates per 100,000<br>(95% UI) |                  | Percentage change of age-standardized rates<br>(95% UI) |
|                             | (Year 1990)                | (Year 2019)               | (Year 1990)                                    | (Year 2019)      | (Year 1990–Year 2019)                                   |
| Eritrea                     | 45882 (18912 to 107796)    | 15655 (12704 to 19149)    | 1411 (622 to 3143)                             | 254 (210 to 305) | -82% (-92.1% to -58%)                                   |
| Ethiopia                    | 533016 (297003 to 1055456) | 232073 (198395 to 270172) | 1019 (601 to 1899)                             | 249 (218 to 284) | -75.5% (-86.6% to -58.1%)                               |
| Kenya                       | 49374 (42201 to 57573)     | 114355 (98124 to 132513)  | 254 (221 to 290)                               | 259 (225 to 295) | 1.8% (0.8% to 2.7%)                                     |
| Madagascar                  | 28238 (22733 to 34714)     | 57866 (47018 to 70749)    | 254 (208 to 309)                               | 233 (192 to 279) | -8.5% (-12.3% to -4.0%)                                 |
| Malawi                      | 17980 (14480 to 22169)     | 33959 (27334 to 42233)    | 204 (167 to 246)                               | 197 (162 to 238) | -3.3% (-6.9% to 0.5%)                                   |
| Mozambique                  | 40434 (30166 to 60812)     | 79887 (64958 to 97654)    | 335 (261 to 486)                               | 318 (261 to 381) | -5.2% (-31.8% to 12.2%)                                 |
| Rwanda                      | 33831 (23013 to 55618)     | 30616 (24797 to 37465)    | 494 (354 to 772)                               | 259 (213 to 313) | -47.6% (-65.9% to -31.3%)                               |
| Somalia                     | 27638 (17267 to 51140)     | 50001 (39176 to 66334)    | 405 (266 to 709)                               | 267 (215 to 343) | -34.2% (-53.7% to -13.8%)                               |
| South Sudan                 | 14422 (11653 to 17614)     | 23374 (18761 to 29502)    | 275 (227 to 332)                               | 275 (227 to 342) | 0.3% (-6.9% to 14.1%)                                   |
| Uganda                      | 38848 (31013 to 49200)     | 85312 (69281 to 105407)   | 246 (202 to 304)                               | 230 (191 to 275) | -6.6% (-18.4% to 0.9%)                                  |
| United Republic of Tanzania | 53724 (43604 to 65758)     | 113661 (92406 to 139892)  | 225 (186 to 272)                               | 216 (180 to 261) | -3.9% (-7.5% to -0.3%)                                  |
| Zambia                      | 14474 (11753 to 17785)     | 33022 (26718 to 40468)    | 201 (168 to 241)                               | 199 (165 to 239) | -0.9% (-5.2% to 3.4%)                                   |

1  
2  
3  
4  
5  
6  
7  
8  
9  
10  
11  
12  
13  
14  
15  
16  
17  
18  
19  
20  
21  
22  
23  
24  
25  
26  
27  
28  
29  
30  
31  
32  
33  
34  
35  
36  
37  
38  
39  
40  
41  
42  
43  
44  
45  
46

| Location                          | Incidence                 |                           |                                                |                  |                                                         |
|-----------------------------------|---------------------------|---------------------------|------------------------------------------------|------------------|---------------------------------------------------------|
|                                   | Numbers<br>(95% UI)       |                           | Age-standardized rates per 100,000<br>(95% UI) |                  | Percentage change of age-standardized rates<br>(95% UI) |
|                                   | (Year 1990)               | (Year 2019)               | (Year 1990)                                    | (Year 2019)      | (Year 1990–Year 2019)                                   |
| <b>Central Sub-Saharan Africa</b> | 124283 (103595 to 154993) | 253964 (218605 to 293993) | 244 (207 to 294)                               | 217 (189 to 246) | -11.3% (-19.9% to -5.1%)                                |
| Angola                            | 39241 (27108 to 66030)    | 56663 (48838 to 65681)    | 382 (278 to 599)                               | 218 (190 to 247) | -43% (-63.3% to -22.5%)                                 |
| Central African Republic          | 4641 (4002 to 5348)       | 12095 (9996 to 15534)     | 192 (167 to 218)                               | 243 (205 to 301) | 26.6% (13.1% to 54.7%)                                  |
| Congo                             | 4611 (3977 to 5326)       | 9480 (8121 to 10899)      | 216 (188 to 245)                               | 200 (173 to 227) | -7.3% (-10.2% to -4.3%)                                 |
| Democratic Republic of the Congo  | 72855 (62741 to 84539)    | 169290 (145141 to 197215) | 213 (186 to 243)                               | 215 (188 to 247) | 1.2% (-2.9% to 7.3%)                                    |
| Equatorial Guinea                 | 766 (659 to 879)          | 2665 (2278 to 3133)       | 200 (173 to 225)                               | 211 (184 to 242) | 5.9% (1.1% to 10.6%)                                    |
| Gabon                             | 2170 (1871 to 2497)       | 3771 (3259 to 4323)       | 243 (211 to 276)                               | 234 (204 to 265) | -3.7% (-6.6% to -0.6%)                                  |

Abbreviations: UI, uncertainty interval

Table 9. Prevalence of traumatic brain injury in 1990 and 2019, and percentage changes of age-standardized estimates by location, 1990–2019

| Location                  | Prevalence                      |                                 |                                                    |                     |                                                             |
|---------------------------|---------------------------------|---------------------------------|----------------------------------------------------|---------------------|-------------------------------------------------------------|
|                           | Numbers<br>(95% UI)             |                                 | Age-standardized estimates per 100,000<br>(95% UI) |                     | Percentage change of age-standardized<br>estimates (95% UI) |
|                           | (Year 1990)                     | (Year 2019)                     | (Year 1990)                                        | (Year 2019)         | (Year 1990–Year 2019)                                       |
| Global                    | 27223249 (26109471 to 28451588) | 48987927 (46840150 to 51316804) | 599 (576 to 626)                                   | 599 (573 to 627)    | 0.0% (-1.1% to 1.2%)                                        |
| High-income               | 7083312 (6797231 to 7400614)    | 9628688 (9197255 to 10070244)   | 669 (642 to 699)                                   | 611 (585 to 640)    | -8.6% (-9.6% to -7.6%)                                      |
| High-income North America | 1787399 (1704060 to 1883324)    | 2529864 (2411434 to 2659615)    | 564 (537 to 595)                                   | 503 (480 to 530)    | -10.8% (-12% to -9.6%)                                      |
| Canada                    | 232061 (221455 to 242912)       | 409106 (389130 to 430098)       | 751 (717 to 786)                                   | 732 (699 to 768)    | -2.5% (-4.4% to -0.4%)                                      |
| Greenland                 | 268 (254 to 284)                | 273 (261 to 287)                | 546 (520 to 576)                                   | 418 (399 to 439)    | -23.5% (-24.8% to -22.1%)                                   |
| United States of America  | 1555029 (1478138 to 1643310)    | 2120444 (2015771 to 2235606)    | 545 (517 to 576)                                   | 476 (452 to 503)    | -12.6% (-13.9% to -11.4%)                                   |
| Australasia               | 245389 (233066 to 259182)       | 437585 (414576 to 462102)       | 1117 (1059 to 1181)                                | 1145 (1082 to 1220) | 2.5% (0.7% to 4.3%)                                         |
| Australia                 | 198541 (188680 to 209805)       | 361334 (342297 to 381913)       | 1084 (1029 to 1148)                                | 1118 (1056 to 1194) | 3.1% (1.2% to 5.2%)                                         |
| New Zealand               | 46848 (44344 to 49303)          | 76252 (72471 to 80358)          | 1282 (1214 to 1352)                                | 1291 (1225 to 1367) | 0.7% (-1.4% to 3.3%)                                        |
| High-income Asia Pacific  | 1146281 (1098572 to 1197980)    | 1569359 (1503598 to 1638630)    | 583 (560 to 609)                                   | 526 (504 to 552)    | -9.8% (-11.0% to -8.5%)                                     |
| Brunei Darussalam         | 1433 (1363 to 1505)             | 2753 (2625 to 2901)             | 748 (716 to 783)                                   | 645 (618 to 676)    | -13.7% (-15.4% to -12.1%)                                   |
| Japan                     | 794144 (759571 to 830984)       | 942598 (902464 to 984158)       | 515 (492 to 539)                                   | 432 (413 to 452)    | -16.1% (-17.2% to -15%)                                     |

1

2

3

4

5

6

7

8

9

10

11

12

13

14

15

16

17

18

19

20

21

22

23

24

25

26

27

28

29

30

31

32

33

34

35

36

37

38

39

40

41

42

43

44

45

46

| Location          | Prevalence                   |                              |                                                    |                   |                                                             |
|-------------------|------------------------------|------------------------------|----------------------------------------------------|-------------------|-------------------------------------------------------------|
|                   | Numbers<br>(95% UI)          |                              | Age-standardized estimates per 100,000<br>(95% UI) |                   | Percentage change of age-standardized<br>estimates (95% UI) |
|                   | (Year 1990)                  | (Year 2019)                  | (Year 1990)                                        | (Year 2019)       | (Year 1990–Year 2019)                                       |
| Republic of Korea | 331627 (317243 to 347338)    | 578220 (549546 to 608111)    | 826 (791 to 864)                                   | 756 (719 to 796)  | -8.5% (-10.5% to -6.5%)                                     |
| Singapore         | 19078 (18198 to 20119)       | 45787 (43497 to 48284)       | 636 (609 to 668)                                   | 619 (589 to 654)  | -2.7% (-4.7% to -0.7%)                                      |
| Western Europe    | 3589411 (3430217 to 3763722) | 4558854 (4307986 to 4805028) | 752 (718 to 789)                                   | 687 (652 to 726)  | -8.5% (-10.2% to -6.8%)                                     |
| Andorra           | 485 (461 to 511)             | 1054 (1001 to 1112)          | 843 (800 to 887)                                   | 860 (816 to 908)  | 2.1% (0.2% to 4.3%)                                         |
| Austria           | 84367 (80516 to 88743)       | 102932 (97216 to 109369)     | 867 (826 to 913)                                   | 764 (721 to 815)  | -11.8% (-14% to -9.3%)                                      |
| Belgium           | 107317 (102334 to 112625)    | 157277 (148398 to 167372)    | 855 (813 to 898)                                   | 903 (852 to 962)  | 5.6% (3.0% to 8.4%)                                         |
| Cyprus            | 5615 (5361 to 5897)          | 11806 (11149 to 12487)       | 695 (663 to 730)                                   | 709 (669 to 751)  | 2.0% (-0.8% to 5.0%)                                        |
| Denmark           | 53543 (50856 to 56416)       | 55684 (52605 to 58826)       | 791 (754 to 830)                                   | 678 (638 to 721)  | -14.3% (-16.9% to -11.6%)                                   |
| Finland           | 65196 (61947 to 69082)       | 85065 (80164 to 90379)       | 1061 (1006 to 1125)                                | 997 (936 to 1071) | -6.0% (-8.3% to -3.3%)                                      |
| France            | 635312 (606658 to 665578)    | 850166 (803396 to 897985)    | 898 (859 to 942)                                   | 831 (786 to 879)  | -7.6% (-9.7% to -5.4%)                                      |
| Germany           | 755519 (721936 to 795139)    | 943401 (888790 to 996046)    | 732 (698 to 772)                                   | 700 (661 to 744)  | -4.4% (-6.9% to -1.9%)                                      |
| Greece            | 96681 (92044 to 101849)      | 102345 (97112 to 107847)     | 763 (725 to 805)                                   | 673 (635 to 713)  | -11.9% (-13.9% to -9.7%)                                    |
| Iceland           | 1951 (1860 to 2050)          | 3117 (2943 to 3311)          | 728 (694 to 766)                                   | 699 (657 to 745)  | -4.1% (-6.7% to -1.5%)                                      |

| Location       | Prevalence                |                           |                                                    |                  |                                                             |
|----------------|---------------------------|---------------------------|----------------------------------------------------|------------------|-------------------------------------------------------------|
|                | Numbers<br>(95% UI)       |                           | Age-standardized estimates per 100,000<br>(95% UI) |                  | Percentage change of age-standardized<br>estimates (95% UI) |
|                | (Year 1990)               | (Year 2019)               | (Year 1990)                                        | (Year 2019)      | (Year 1990–Year 2019)                                       |
|                | Ireland                   | 25441 (24177 to 26775)    | 41596 (39247 to 44184)                             | 686 (652 to 723) | 678 (639 to 724)                                            |
| Israel         | 29810 (28368 to 31355)    | 65091 (61407 to 69200)    | 629 (599 to 661)                                   | 652 (613 to 695) | 3.6% (0.3% to 7.5%)                                         |
| Italy          | 594610 (561364 to 626824) | 652766 (614279 to 691707) | 808 (764 to 852)                                   | 657 (621 to 694) | -18.7% (-20.0% to -17.3%)                                   |
| Luxembourg     | 4203 (4008 to 4421)       | 6658 (6300 to 7033)       | 889 (848 to 935)                                   | 788 (746 to 834) | -11.4% (-13.4% to -9.2%)                                    |
| Malta          | 2782 (2636 to 2936)       | 4834 (4558 to 5115)       | 685 (648 to 724)                                   | 754 (709 to 804) | 10.1% (7.5% to 12.8%)                                       |
| Monaco         | 164 (156 to 172)          | 213 (203 to 224)          | 366 (348 to 386)                                   | 370 (352 to 391) | 1.1% (-0.8% to 3.0%)                                        |
| Netherlands    | 108496 (103271 to 113683) | 174265 (164438 to 183817) | 612 (583 to 643)                                   | 659 (625 to 692) | 7.6% (5.0% to 10.0%)                                        |
| Norway         | 24469 (23315 to 25771)    | 29219 (27778 to 30849)    | 456 (435 to 479)                                   | 387 (369 to 408) | -15.1% (-16.4% to -13.7%)                                   |
| Portugal       | 84457 (80974 to 88627)    | 83546 (79556 to 87660)    | 713 (683 to 749)                                   | 495 (472 to 520) | -30.6% (-32.7% to -28.7%)                                   |
| San Marino     | 112 (107 to 118)          | 174 (167 to 183)          | 407 (388 to 429)                                   | 382 (363 to 404) | -6.2% (-8.1% to -4.3%)                                      |
| Spain          | 340863 (326210 to 356774) | 455709 (431959 to 480189) | 747 (715 to 783)                                   | 663 (626 to 706) | -11.3% (-14.6% to -8.2%)                                    |
| Sweden         | 46088 (43789 to 48587)    | 52538 (49831 to 55634)    | 411 (390 to 434)                                   | 357 (339 to 378) | -13.2% (-14.8% to -11.4%)                                   |
| Switzerland    | 95970 (91290 to 100912)   | 118708 (111882 to 125639) | 1082 (1027 to 1137)                                | 886 (832 to 944) | -18.1% (-20.1% to -15.4%)                                   |
| United Kingdom | 422981 (402489 to 443629) | 556715 (524564 to 587112) | 599 (570 to 630)                                   | 592 (559 to 625) | -1.2% (-3.0% to 0.5%)                                       |



| Location                                                | Prevalence                   |                              |                                                    |                     |                                                             |
|---------------------------------------------------------|------------------------------|------------------------------|----------------------------------------------------|---------------------|-------------------------------------------------------------|
|                                                         | Numbers<br>(95% UI)          |                              | Age-standardized estimates per 100,000<br>(95% UI) |                     | Percentage change of age-standardized<br>estimates (95% UI) |
|                                                         | (Year 1990)                  | (Year 2019)                  | (Year 1990)                                        | (Year 2019)         | (Year 1990–Year 2019)                                       |
| <b>Southern Latin America</b>                           | 314832 (302011 to 328300)    | 533026 (510966 to 557226)    | 661 (635 to 689)                                   | 710 (680 to 744)    | 7.4% (5.7% to 9.0%)                                         |
| Argentina                                               | 211134 (202345 to 220806)    | 341995 (327397 to 357857)    | 655 (628 to 685)                                   | 694 (664 to 727)    | 6.0% (3.9% to 8.0%)                                         |
| Chile                                                   | 77223 (74043 to 80606)       | 158038 (151516 to 164956)    | 649 (624 to 678)                                   | 732 (701 to 765)    | 12.7% (10.9% to 14.8%)                                      |
| Uruguay                                                 | 26462 (25314 to 27602)       | 32966 (31674 to 34324)       | 782 (747 to 816)                                   | 790 (757 to 823)    | 0.9% (-1.4% to 3.3%)                                        |
| <b>Central Europe, Eastern Europe, and Central Asia</b> | 6453206 (6144026 to 6810900) | 6272924 (5973428 to 6619235) | 1421 (1353 to 1499)                                | 1179 (1121 to 1245) | -17.0% (-17.9% to -16.2%)                                   |
| <b>Eastern Europe</b>                                   | 4141204 (3921920 to 4395004) | 3684328 (3481748 to 3916305) | 1593 (1511 to 1688)                                | 1312 (1240 to 1393) | -17.6% (-18.6% to -16.7%)                                   |
| Belarus                                                 | 160205 (152714 to 168752)    | 151525 (144167 to 160168)    | 1345 (1281 to 1414)                                | 1175 (1117 to 1241) | -12.7% (-14.5% to -11.1%)                                   |
| Estonia                                                 | 29223 (27868 to 30752)       | 19177 (18313 to 20152)       | 1597 (1521 to 1679)                                | 1044 (995 to 1095)  | -34.7% (-36.1% to -33.0%)                                   |
| Latvia                                                  | 55190 (52619 to 58063)       | 30132 (28879 to 31651)       | 1742 (1662 to 1833)                                | 1095 (1046 to 1150) | -37.2% (-38.4% to -35.9%)                                   |
| Lithuania                                               | 68835 (65919 to 72396)       | 49561 (47552 to 51935)       | 1648 (1577 to 1732)                                | 1205 (1155 to 1265) | -26.9% (-28.3% to -25.2%)                                   |
| Republic of Moldova                                     | 57736 (55297 to 60492)       | 45620 (43596 to 47808)       | 1260 (1207 to 1321)                                | 939 (896 to 983)    | -25.5% (-27.0% to -24.1%)                                   |
| Russian Federation                                      | 2844919 (2690581 to 3021463) | 2659714 (2510186 to 2831620) | 1658 (1569 to 1758)                                | 1365 (1288 to 1450) | -17.7% (-18.8% to -16.6%)                                   |

1  
2  
3  
4  
5  
6  
7  
8  
9  
10  
11  
12  
13  
14  
15  
16  
17  
18  
19  
20  
21  
22  
23  
24  
25  
26  
27  
28  
29  
30  
31  
32  
33  
34  
35  
36  
37  
38  
39  
40  
41  
42  
43  
44  
45  
46

| Location               | Prevalence                   |                              |                                                    |                     |                                                             |
|------------------------|------------------------------|------------------------------|----------------------------------------------------|---------------------|-------------------------------------------------------------|
|                        | Numbers<br>(95% UI)          |                              | Age-standardized estimates per 100,000<br>(95% UI) |                     | Percentage change of age-standardized<br>estimates (95% UI) |
|                        | (Year 1990)                  | (Year 2019)                  | (Year 1990)                                        | (Year 2019)         | (Year 1990–Year 2019)                                       |
| Ukraine                | 925096 (875143 to 984013)    | 728598 (688793 to 774019)    | 1471 (1391 to 1563)                                | 1229 (1162 to 1305) | -16.5% (-18.1% to -15.0%)                                   |
| Central Europe         | 1905530 (1824286 to 1993636) | 1996004 (1907261 to 2099717) | 1389 (1329 to 1454)                                | 1259 (1200 to 1325) | -9.3% (-10.7% to -8.0%)                                     |
| Albania                | 32988 (31362 to 34644)       | 40368 (38379 to 42440)       | 1185 (1128 to 1242)                                | 1180 (1119 to 1241) | -0.4% (-3.1% to 1.7%)                                       |
| Bosnia and Herzegovina | 50335 (48011 to 52860)       | 55240 (51846 to 59262)       | 1075 (1026 to 1129)                                | 1233 (1156 to 1324) | 14.7% (11.3% to 20.0%)                                      |
| Bulgaria               | 140389 (134253 to 147124)    | 115486 (110330 to 121483)    | 1332 (1273 to 1396)                                | 1206 (1148 to 1267) | -9.5% (-11.0% to -7.8%)                                     |
| Croatia                | 88909 (84838 to 92936)       | 90349 (86071 to 94948)       | 1530 (1459 to 1599)                                | 1430 (1363 to 1501) | -6.6% (-8.7% to -4.4%)                                      |
| Czechia                | 190939 (182529 to 199866)    | 210700 (201553 to 221445)    | 1581 (1510 to 1658)                                | 1397 (1333 to 1468) | -11.6% (-13.6% to -9.5%)                                    |
| Hungary                | 188342 (179917 to 196921)    | 166974 (159293 to 175128)    | 1482 (1418 to 1550)                                | 1197 (1140 to 1257) | -19.3% (-21.3% to -17.1%)                                   |
| Montenegro             | 8049 (7690 to 8410)          | 9943 (9483 to 10437)         | 1247 (1192 to 1303)                                | 1250 (1192 to 1312) | 0.2% (-1.4% to 1.9%)                                        |
| North Macedonia        | 21250 (20272 to 22230)       | 30086 (28684 to 31639)       | 1036 (989 to 1084)                                 | 1095 (1042 to 1151) | 5.7% (3.4% to 7.7%)                                         |
| Poland                 | 592344 (565150 to 624014)    | 701517 (667414 to 740911)    | 1425 (1359 to 1501)                                | 1313 (1247 to 1386) | -7.9% (-9.5% to -6.3%)                                      |
| Romania                | 341836 (326973 to 358956)    | 296504 (282553 to 312297)    | 1307 (1249 to 1370)                                | 1120 (1063 to 1179) | -14.3% (-16.1% to -12.8%)                                   |

| Location     | Prevalence                |                           |                                                    |                     |                                                             |
|--------------|---------------------------|---------------------------|----------------------------------------------------|---------------------|-------------------------------------------------------------|
|              | Numbers<br>(95% UI)       |                           | Age-standardized estimates per 100,000<br>(95% UI) |                     | Percentage change of age-standardized<br>estimates (95% UI) |
|              | (Year 1990)               | (Year 2019)               | (Year 1990)                                        | (Year 2019)         | (Year 1990–Year 2019)                                       |
|              | Serbia                    | 127430 (121821 to 133686) | 131249 (125348 to 138035)                          | 1187 (1134 to 1245) | 1135 (1080 to 1195)                                         |
| Slovakia     | 81811 (78231 to 85769)    | 100130 (95678 to 105347)  | 1444 (1379 to 1514)                                | 1351 (1290 to 1415) | -6.4% (-8.0% to -4.6%)                                      |
| Slovenia     | 40908 (39030 to 42872)    | 47458 (45204 to 49694)    | 1797 (1713 to 1884)                                | 1521 (1448 to 1595) | -15.3% (-17.2% to -13.1%)                                   |
| Central Asia | 406473 (388360 to 426724) | 592593 (564520 to 622301) | 704 (674 to 739)                                   | 650 (621 to 682)    | -7.7% (-8.9% to -6.6%)                                      |
| Armenia      | 35694 (30551 to 43742)    | 26341 (23832 to 30265)    | 1101 (950 to 1342)                                 | 724 (655 to 830)    | -34.2% (-38.8% to -30%)                                     |
| Azerbaijan   | 38686 (36987 to 40640)    | 62368 (59069 to 65715)    | 611 (585 to 642)                                   | 553 (524 to 581)    | -9.5% (-11.7% to -7.0%)                                     |
| Georgia      | 46220 (43961 to 48652)    | 38008 (36181 to 39921)    | 777 (739 to 818)                                   | 827 (787 to 868)    | 6.5% (4.3% to 8.8%)                                         |
| Kazakhstan   | 120024 (114297 to 126084) | 149753 (142403 to 157250) | 797 (759 to 836)                                   | 784 (748 to 823)    | -1.5% (-3.2% to 0.1%)                                       |
| Kyrgyzstan   | 25831 (24723 to 27104)    | 35868 (34193 to 37595)    | 715 (684 to 751)                                   | 609 (581 to 639)    | -14.9% (-16.6% to -13.3%)                                   |
| Mongolia     | 9143 (8717 to 9577)       | 24286 (23110 to 25572)    | 594 (568 to 624)                                   | 734 (702 to 772)    | 23.5% (21.5% to 25.7%)                                      |
| Tajikistan   | 23820 (22738 to 25109)    | 43353 (40216 to 47274)    | 633 (605 to 667)                                   | 542 (504 to 590)    | -14.5% (-19.0% to -7.9%)                                    |
| Turkmenistan | 15354 (14621 to 16120)    | 25771 (24602 to 27050)    | 557 (532 to 583)                                   | 524 (502 to 549)    | -5.8% (-7.8% to -3.8%)                                      |

1  
2

| Location                           | Prevalence                   |                              |                                                    |                  |                                                             |
|------------------------------------|------------------------------|------------------------------|----------------------------------------------------|------------------|-------------------------------------------------------------|
|                                    | Numbers<br>(95% UI)          |                              | Age-standardized estimates per 100,000<br>(95% UI) |                  | Percentage change of age-standardized<br>estimates (95% UI) |
|                                    | (Year 1990)                  | (Year 2019)                  | (Year 1990)                                        | (Year 2019)      | (Year 1990–Year 2019)                                       |
| Uzbekistan                         | 91701 (87543 to 96282)       | 186844 (177804 to 196282)    | 592 (566 to 622)                                   | 597 (570 to 626) | 0.7% (-0.9% to 2.5%)                                        |
| <b>Latin America and Caribbean</b> | 1408278 (1346293 to 1483754) | 2607065 (2504148 to 2726076) | 463 (445 to 486)                                   | 430 (413 to 450) | -7.1% (-8.6% to -5.6%)                                      |
| <b>Central Latin America</b>       | 709801 (672148 to 755684)    | 1257961 (1206027 to 1317005) | 579 (552 to 611)                                   | 502 (482 to 526) | -13.2% (-14.9% to -11.9%)                                   |
| Colombia                           | 211177 (199918 to 223864)    | 332994 (319128 to 348824)    | 823 (782 to 866)                                   | 648 (620 to 679) | -21.3% (-23.3% to -19.4%)                                   |
| Costa Rica                         | 13910 (13318 to 14642)       | 31385 (30134 to 32937)       | 595 (571 to 624)                                   | 615 (590 to 645) | 3.4% (1.6% to 5.2%)                                         |
| El Salvador                        | 34989 (28041 to 46601)       | 42703 (39065 to 48120)       | 835 (688 to 1079)                                  | 704 (642 to 796) | -15.8% (-26.7% to -5.9%)                                    |
| Guatemala                          | 32528 (28357 to 39768)       | 81261 (76894 to 87161)       | 571 (507 to 676)                                   | 566 (535 to 610) | -0.8% (-10.9% to 6.7%)                                      |
| Honduras                           | 16208 (15518 to 17034)       | 43820 (41768 to 45816)       | 510 (492 to 532)                                   | 544 (520 to 567) | 6.6% (4.5% to 8.9%)                                         |
| Mexico                             | 273095 (259200 to 289310)    | 480897 (459524 to 507789)    | 441 (421 to 464)                                   | 383 (366 to 404) | -13.1% (-14.1% to -12%)                                     |
| Nicaragua                          | 19374 (14550 to 27939)       | 30687 (27244 to 36377)       | 696 (552 to 951)                                   | 548 (485 to 655) | -21.3% (-31.8% to -11.8%)                                   |
| Panama                             | 11198 (10639 to 11926)       | 23078 (22046 to 24233)       | 578 (551 to 611)                                   | 551 (526 to 578) | -4.6% (-7.1% to -2.7%)                                      |
| Venezuela (Bolivarian Republic of) | 97324 (93032 to 102354)      | 191135 (183441 to 199635)    | 670 (643 to 699)                                   | 644 (618 to 672) | -3.9% (-6.2% to -2.2%)                                      |

40  
41  
42  
43  
44  
45  
46

| Location                         | Prevalence                |                           |                                                    |                  |                                                             |
|----------------------------------|---------------------------|---------------------------|----------------------------------------------------|------------------|-------------------------------------------------------------|
|                                  | Numbers<br>(95% UI)       |                           | Age-standardized estimates per 100,000<br>(95% UI) |                  | Percentage change of age-standardized<br>estimates (95% UI) |
|                                  | (Year 1990)               | (Year 2019)               | (Year 1990)                                        | (Year 2019)      | (Year 1990–Year 2019)                                       |
| <b>Andean Latin America</b>      | 115610 (109587 to 123199) | 258082 (247394 to 269334) | 402 (384 to 424)                                   | 425 (408 to 443) | 5.6% (2.9% to 8.2%)                                         |
| Bolivia (Plurinational State of) | 16725 (16072 to 17429)    | 38426 (36793 to 40095)    | 362 (348 to 375)                                   | 368 (353 to 383) | 1.8% (-0.1% to 3.7%)                                        |
| Ecuador                          | 33356 (31684 to 35275)    | 81011 (77741 to 84639)    | 448 (428 to 469)                                   | 489 (469 to 511) | 9.3% (6.5% to 11.9%)                                        |
| Peru                             | 65529 (61055 to 71465)    | 138644 (132302 to 145836) | 393 (371 to 423)                                   | 411 (393 to 432) | 4.5% (0.5% to 8.1%)                                         |
| <b>Caribbean</b>                 | 152940 (146922 to 159299) | 279129 (266795 to 292459) | 506 (487 to 526)                                   | 555 (531 to 582) | 9.8% (7.1% to 13.5%)                                        |
| Antigua and Barbuda              | 247 (237 to 257)          | 490 (471 to 510)          | 447 (429 to 465)                                   | 483 (464 to 502) | 7.9% (6.0% to 9.8%)                                         |
| Bahamas                          | 1046 (1001 to 1095)       | 2096 (2015 to 2181)       | 484 (464 to 504)                                   | 504 (486 to 525) | 4.3% (2.5% to 6.4%)                                         |
| Barbados                         | 1117 (1071 to 1164)       | 1720 (1657 to 1783)       | 428 (410 to 446)                                   | 447 (430 to 464) | 4.5% (2.3% to 6.8%)                                         |
| Belize                           | 635 (607 to 666)          | 2005 (1923 to 2094)       | 489 (469 to 511)                                   | 556 (535 to 578) | 13.6% (11.2% to 15.9%)                                      |
| Bermuda                          | 247 (233 to 263)          | 320 (305 to 338)          | 374 (353 to 397)                                   | 354 (336 to 374) | -5.4% (-7.8% to -3.1%)                                      |
| Cuba                             | 68303 (65366 to 71259)    | 101107 (96780 to 105693)  | 634 (607 to 661)                                   | 638 (611 to 666) | 0.6% (-2.0% to 3.6%)                                        |
| Dominica                         | 283 (271 to 296)          | 376 (362 to 392)          | 429 (410 to 449)                                   | 477 (458 to 498) | 11.2% (8.8% to 13.4%)                                       |
| Dominican Republic               | 24962 (23821 to 26120)    | 63528 (60735 to 66628)    | 468 (448 to 489)                                   | 609 (582 to 638) | 30.1% (27.6% to 32.9%)                                      |
| Grenada                          | 309 (290 to 336)          | 546 (524 to 567)          | 434 (408 to 468)                                   | 483 (464 to 502) | 11.4% (4.8% to 16.2%)                                       |
| Guyana                           | 2534 (2438 to 2643)       | 3823 (3675 to 3970)       | 432 (417 to 449)                                   | 519 (500 to 539) | 20.1% (18.2% to 22.0%)                                      |
| Haiti                            | 18158 (17342 to 18909)    | 50055 (44426 to 58034)    | 385 (370 to 399)                                   | 481 (431 to 553) | 25.0% (13.1% to 42.9%)                                      |

| Location                                      | Prevalence                   |                               |                                                    |                  |                                                             |
|-----------------------------------------------|------------------------------|-------------------------------|----------------------------------------------------|------------------|-------------------------------------------------------------|
|                                               | Numbers<br>(95% UI)          |                               | Age-standardized estimates per 100,000<br>(95% UI) |                  | Percentage change of age-standardized<br>estimates (95% UI) |
|                                               | (Year 1990)                  | (Year 2019)                   | (Year 1990)                                        | (Year 2019)      | (Year 1990–Year 2019)                                       |
|                                               |                              |                               |                                                    |                  |                                                             |
| Jamaica                                       | 7934 (7592 to 8241)          | 12653 (12159 to 13124)        | 401 (385 to 416)                                   | 423 (406 to 438) | 5.3% (3.7% to 7.2%)                                         |
| Puerto Rico                                   | 14884 (14164 to 15663)       | 17797 (16960 to 18675)        | 412 (392 to 434)                                   | 365 (346 to 386) | -11.3% (-13.6% to -8.3%)                                    |
| Saint Kitts and Nevis                         | 120 (114 to 126)             | 243 (232 to 255)              | 338 (322 to 357)                                   | 356 (340 to 375) | 8.4% (6.3% to 10.5%)                                        |
| Saint Lucia                                   | 485 (464 to 507)             | 1014 (975 to 1054)            | 455 (436 to 475)                                   | 493 (474 to 513) | 5.3% (3.3% to 7.4%)                                         |
| Saint Vincent and the Grenadines              | 345 (331 to 360)             | 574 (553 to 596)              | 404 (388 to 421)                                   | 450 (433 to 467) | 11.3% (8.9% to 13.5%)                                       |
| Suriname                                      | 1490 (1402 to 1660)          | 2945 (2826 to 3100)           | 455 (430 to 498)                                   | 483 (464 to 508) | 6.3% (0.5% to 9.4%)                                         |
| Trinidad and Tobago                           | 4345 (4165 to 4545)          | 7914 (7613 to 8241)           | 417 (401 to 435)                                   | 475 (456 to 494) | 13.9% (11.3% to 16.0%)                                      |
| United States Virgin Islands                  | 400 (379 to 422)             | 466 (447 to 489)              | 392 (372 to 413)                                   | 340 (325 to 358) | -13.4% (-15.2% to -11.7%)                                   |
| <b>Tropical Latin America</b>                 | 429926 (410516 to 454470)    | 811893 (772237 to 859923)     | 353 (337 to 371)                                   | 330 (314 to 350) | -6.3% (-9.1% to -3.4%)                                      |
| Brazil                                        | 414928 (396357 to 438869)    | 777443 (739279 to 824188)     | 349 (334 to 368)                                   | 325 (309 to 344) | -6.9% (-9.8% to -4.0%)                                      |
| Paraguay                                      | 14998 (14296 to 15823)       | 34450 (32770 to 36316)        | 503 (480 to 528)                                   | 532 (507 to 560) | 5.9% (3.6% to 8.1%)                                         |
| <b>Southeast Asia, East Asia, and Oceania</b> | 3869502 (3689053 to 4094076) | 9786362 (9269215 to 10368135) | 271 (259 to 286)                                   | 371 (353 to 393) | 37.1% (35.1% to 39.4%)                                      |
| <b>East Asia</b>                              | 2330447 (2212990 to 2468532) | 6771606 (6392908 to 7230198)  | 219 (209 to 232)                                   | 342 (324 to 365) | 56.1% (53.2% to 59.4%)                                      |
| China                                         | 2187277 (2073352 to 2318836) | 6546436 (6173879 to 6994611)  | 213 (202 to 226)                                   | 342 (324 to 365) | 60.6% (57.5% to 64.1%)                                      |
| Democratic People's Republic of Korea         | 55706 (53312 to 58390)       | 97855 (93379 to 103039)       | 292 (281 to 306)                                   | 309 (294 to 325) | 5.5% (3.0% to 7.8%)                                         |

| Location                         | Prevalence                   |                              |                                                    |                  |                                                             |
|----------------------------------|------------------------------|------------------------------|----------------------------------------------------|------------------|-------------------------------------------------------------|
|                                  | Numbers<br>(95% UI)          |                              | Age-standardized estimates per 100,000<br>(95% UI) |                  | Percentage change of age-standardized<br>estimates (95% UI) |
|                                  | (Year 1990)                  | (Year 2019)                  | (Year 1990)                                        | (Year 2019)      | (Year 1990–Year 2019)                                       |
| Taiwan (Province of China)       | 87464 (83846 to 91581)       | 127315 (121795 to 133575)    | 473 (454 to 494)                                   | 367 (352 to 385) | -22.3% (-24.8% to -19.9%)                                   |
| <b>Southeast Asia</b>            | 1524028 (1446391 to 1621291) | 2973675 (2820825 to 3144016) | 430 (410 to 455)                                   | 438 (415 to 462) | 1.8% (-0.3% to 4.1%)                                        |
| Cambodia                         | 33642 (26316 to 51550)       | 71251 (65198 to 82969)       | 468 (385 to 672)                                   | 496 (454 to 580) | 6.2% (-14.0% to 19.6%)                                      |
| Indonesia                        | 476448 (448580 to 509803)    | 782493 (732623 to 837497)    | 337 (318 to 359)                                   | 304 (285 to 324) | -10.0% (-12.3% to -7.0%)                                    |
| Lao People's Democratic Republic | 12303 (11719 to 12991)       | 25230 (24033 to 26580)       | 420 (401 to 441)                                   | 423 (404 to 444) | 0.7% (-1.6% to 2.6%)                                        |
| Malaysia                         | 68021 (64781 to 71801)       | 174373 (166587 to 183447)    | 516 (493 to 543)                                   | 569 (545 to 597) | 10.3% (8.4% to 12.1%)                                       |
| Maldives                         | 495 (474 to 519)             | 1892 (1791 to 2003)          | 360 (345 to 377)                                   | 404 (385 to 425) | 12.2% (8.9% to 16.2%)                                       |
| Mauritius                        | 2677 (2549 to 2837)          | 5050 (4786 to 5334)          | 279 (267 to 296)                                   | 315 (299 to 333) | 12.7% (10.1% to 15.3%)                                      |
| Myanmar                          | 139640 (130748 to 156551)    | 258019 (234542 to 289681)    | 439 (414 to 483)                                   | 488 (446 to 545) | 11.1% (3.4% to 22.5%)                                       |
| Philippines                      | 206438 (194169 to 221200)    | 428823 (406562 to 454093)    | 462 (437 to 491)                                   | 442 (420 to 467) | -4.3% (-6.4% to -2.6%)                                      |
| Seychelles                       | 188 (179 to 199)             | 392 (371 to 416)             | 304 (289 to 321)                                   | 336 (319 to 356) | 10.7% (8.3% to 13.0%)                                       |
| Sri Lanka                        | 72464 (66989 to 80208)       | 145897 (132466 to 165436)    | 502 (468 to 546)                                   | 597 (542 to 678) | 19.1% (12.1% to 28.6%)                                      |
| Thailand                         | 283957 (270592 to 299599)    | 476782 (454192 to 501115)    | 586 (559 to 616)                                   | 511 (488 to 538) | -12.8% (-14.5% to -11%)                                     |
| Timor-Leste                      | 2800 (2173 to 3731)          | 4998 (4249 to 6138)          | 486 (398 to 619)                                   | 510 (431 to 630) | 5.0% (0.4% to 9.4%)                                         |

1  
2  
3  
4  
5  
6  
7  
8  
9  
10  
11  
12  
13  
14  
15  
16  
17  
18  
19  
20  
21  
22  
23  
24  
25  
26  
27  
28  
29  
30  
31  
32  
33  
34  
35  
36  
37  
38  
39  
40  
41  
42  
43  
44  
45  
46

| Location                         | Prevalence                |                           |                                                    |                  |                                                             |
|----------------------------------|---------------------------|---------------------------|----------------------------------------------------|------------------|-------------------------------------------------------------|
|                                  | Numbers<br>(95% UI)       |                           | Age-standardized estimates per 100,000<br>(95% UI) |                  | Percentage change of age-standardized<br>estimates (95% UI) |
|                                  | (Year 1990)               | (Year 2019)               | (Year 1990)                                        | (Year 2019)      | (Year 1990–Year 2019)                                       |
| Viet Nam                         | 222930 (213114 to 233910) | 594579 (567714 to 624209) | 450 (431 to 472)                                   | 579 (555 to 607) | 28.8% (26.6% to 31.3%)                                      |
| <b>Oceania</b>                   | 15027 (14382 to 15767)    | 41081 (38963 to 43478)    | 338 (324 to 353)                                   | 406 (386 to 428) | 20.1% (17.6% to 23.8%)                                      |
| American Samoa                   | 93 (88 to 99)             | 145 (133 to 158)          | 278 (263 to 295)                                   | 277 (255 to 303) | 0.0% (-5.3% to 8.4%)                                        |
| Cook Islands                     | 53 (50 to 56)             | 66 (63 to 71)             | 344 (326 to 367)                                   | 306 (290 to 325) | -11.1% (-12.6% to -9.6%)                                    |
| Fiji                             | 1706 (1629 to 1798)       | 2753 (2628 to 2897)       | 295 (283 to 310)                                   | 313 (299 to 329) | 6.1% (4.2% to 8.2%)                                         |
| Guam                             | 346 (327 to 367)          | 507 (481 to 536)          | 312 (297 to 331)                                   | 277 (263 to 293) | -11.2% (-12.8% to -9.7%)                                    |
| Kiribati                         | 130 (124 to 136)          | 243 (231 to 256)          | 233 (223 to 245)                                   | 247 (236 to 259) | 5.7% (3.2% to 8.1%)                                         |
| Marshall Islands                 | 90 (86 to 95)             | 170 (162 to 179)          | 338 (323 to 356)                                   | 353 (338 to 371) | 4.4% (2.8% to 5.9%)                                         |
| Micronesia (Federated States of) | 229 (218 to 241)          | 329 (312 to 349)          | 339 (324 to 358)                                   | 369 (351 to 389) | 8.7% (6.2% to 11.6%)                                        |
| Nauru                            | 19 (18 to 21)             | 22 (21 to 23)             | 290 (275 to 309)                                   | 289 (274 to 307) | -0.5% (-1.8% to 0.8%)                                       |
| Niue                             | 6 (5 to 6)                | 5 (5 to 6)                | 265 (251 to 281)                                   | 278 (261 to 297) | 5.1% (1.9% to 9.5%)                                         |
| Northern Mariana Islands         | 132 (124 to 142)          | 160 (152 to 170)          | 377 (358 to 402)                                   | 305 (290 to 322) | -19% (-21% to -17.2%)                                       |
| Palau                            | 40 (38 to 43)             | 73 (69 to 78)             | 320 (303 to 338)                                   | 332 (314 to 351) | 3.9% (2.1% to 5.5%)                                         |
| Papua New Guinea                 | 9638 (9217 to 10099)      | 30861 (29214 to 32771)    | 350 (335 to 366)                                   | 432 (410 to 456) | 23.5% (20.6% to 27.7%)                                      |
| Samoa                            | 413 (393 to 435)          | 772 (719 to 838)          | 361 (344 to 381)                                   | 439 (411 to 474) | 21.7% (16.2% to 30.1%)                                      |
| Solomon Islands                  | 756 (720 to 795)          | 1914 (1818 to 2024)       | 366 (350 to 384)                                   | 411 (392 to 433) | 12.4% (10.1% to 15%)                                        |
| Tokelau                          | 3 (3 to 3)                | 3 (3 to 4)                | 240 (227 to 255)                                   | 255 (241 to 271) | 6.4% (5.1% to 7.8%)                                         |
| Tonga                            | 217 (207 to 230)          | 277 (264 to 290)          | 315 (301 to 332)                                   | 317 (303 to 333) | 0.6% (-2.1% to 3.1%)                                        |
| Tuvalu                           | 19 (18 to 20)             | 28 (27 to 30)             | 239 (226 to 255)                                   | 256 (241 to 273) | 16.6% (12.9% to 21.9%)                                      |
| Vanuatu                          | 306 (292 to 322)          | 812 (766 to 870)          | 304 (290 to 320)                                   | 354 (334 to 377) | 6.7% (5.2% to 8.3%)                                         |



| Location                     | Prevalence                   |                              |                                                    |                   |                                                             |
|------------------------------|------------------------------|------------------------------|----------------------------------------------------|-------------------|-------------------------------------------------------------|
|                              | Numbers<br>(95% UI)          |                              | Age-standardized estimates per 100,000<br>(95% UI) |                   | Percentage change of age-standardized<br>estimates (95% UI) |
|                              | (Year 1990)                  | (Year 2019)                  | (Year 1990)                                        | (Year 2019)       | (Year 1990–Year 2019)                                       |
| North Africa and Middle East | 1361137 (1227870 to 1581514) | 3096882 (2843657 to 3481267) | 539 (490 to 621)                                   | 552 (507 to 619)  | 2.4% (-3.3% to 5.7%)                                        |
| North Africa and Middle East | 1361137 (1227870 to 1581514) | 3096882 (2843657 to 3481267) | 539 (490 to 621)                                   | 552 (507 to 619)  | 2.4% (-3.3% to 5.7%)                                        |
| Afghanistan                  | 86158 (38145 to 226063)      | 182536 (119628 to 305576)    | 944 (440 to 2344)                                  | 775 (486 to 1367) | -17.9% (-42.8% to 24.8%)                                    |
| Algeria                      | 98764 (93969 to 103896)      | 202606 (192787 to 214115)    | 557 (533 to 584)                                   | 503 (480 to 530)  | -9.8% (-12.0% to -7.0%)                                     |
| Bahrain                      | 1947 (1848 to 2051)          | 8331 (7910 to 8808)          | 467 (447 to 489)                                   | 487 (465 to 512)  | 4.2% (1.5% to 7.2%)                                         |
| Egypt                        | 161672 (154186 to 169480)    | 337571 (322203 to 354072)    | 380 (365 to 397)                                   | 397 (379 to 415)  | 4.3% (1.7% to 7.0%)                                         |
| Iran (Islamic Republic of)   | 304254 (271636 to 352096)    | 478928 (445665 to 520699)    | 757 (673 to 887)                                   | 550 (513 to 595)  | -27.4% (-34.4% to -22.2%)                                   |
| Iraq                         | 112013 (81392 to 162656)     | 261206 (207437 to 347346)    | 958 (692 to 1410)                                  | 750 (597 to 996)  | -21.7% (-31.2% to -12.7%)                                   |
| Jordan                       | 10142 (9672 to 10621)        | 39421 (37539 to 41373)       | 418 (401 to 436)                                   | 403 (386 to 422)  | -3.6% (-5.7% to -1.6%)                                      |
| Kuwait                       | 8810 (8126 to 9769)          | 24948 (23651 to 26471)       | 622 (583 to 672)                                   | 550 (524 to 579)  | -11.6% (-17.4% to -7.7%)                                    |
| Lebanon                      | 21210 (15217 to 33977)       | 28045 (23771 to 37081)       | 765 (556 to 1213)                                  | 528 (447 to 700)  | -30.9% (-42.9% to -19.1%)                                   |
| Libya                        | 15766 (14915 to 16737)       | 43130 (39583 to 47930)       | 562 (536 to 595)                                   | 627 (579 to 694)  | 11.6% (5.9% to 19.3%)                                       |

1  
2  
3  
4  
5  
6  
7  
8  
9  
10  
11  
12  
13  
14  
15  
16  
17  
18  
19  
20  
21  
22  
23  
24  
25  
26  
27  
28  
29  
30  
31  
32  
33  
34  
35  
36  
37  
38  
39  
40  
41  
42  
43  
44  
45  
46

| Location             | Prevalence                   |                                 |                                                    |                     |                                                             |
|----------------------|------------------------------|---------------------------------|----------------------------------------------------|---------------------|-------------------------------------------------------------|
|                      | Numbers<br>(95% UI)          |                                 | Age-standardized estimates per 100,000<br>(95% UI) |                     | Percentage change of age-standardized<br>estimates (95% UI) |
|                      | (Year 1990)                  | (Year 2019)                     | (Year 1990)                                        | (Year 2019)         | (Year 1990–Year 2019)                                       |
| Morocco              | 94093 (89709 to 98896)       | 179475 (171427 to 188308)       | 489 (468 to 512)                                   | 503 (481 to 528)    | 2.9% (0.2% to 5.0%)                                         |
| Oman                 | 9477 (8971 to 10027)         | 28135 (26674 to 29779)          | 715 (680 to 753)                                   | 679 (649 to 713)    | -5.0% (-7.1% to -3.1%)                                      |
| Palestine            | 8972 (6670 to 12759)         | 26166 (19893 to 36241)          | 616 (478 to 842)                                   | 688 (527 to 948)    | 11.7% (4.9% to 17.8%)                                       |
| Qatar                | 2872 (2716 to 3037)          | 18974 (17875 to 20194)          | 735 (702 to 772)                                   | 664 (632 to 701)    | -9.7% (-11.8% to -7.3%)                                     |
| Saudi Arabia         | 89712 (84748 to 94811)       | 369775 (344765 to 397295)       | 853 (813 to 899)                                   | 1071 (1008 to 1140) | 25.5% (22.3% to 28.3%)                                      |
| Sudan                | 35193 (31486 to 41234)       | 76842 (69587 to 87305)          | 255 (235 to 287)                                   | 268 (244 to 304)    | 5.2% (0.6% to 10.1%)                                        |
| Syrian Arab Republic | 32418 (29591 to 37968)       | 111858 (77475 to 171069)        | 382 (353 to 436)                                   | 834 (566 to 1291)   | 118.2% (55.8% to 220.8%)                                    |
| Tunisia              | 31239 (29906 to 32701)       | 63641 (60813 to 66654)          | 477 (458 to 498)                                   | 496 (474 to 519)    | 4.0% (1.9% to 6.4%)                                         |
| Turkey               | 189610 (181971 to 197914)    | 428134 (407264 to 451661)       | 394 (379 to 411)                                   | 471 (449 to 496)    | 19.6% (16.1% to 24.1%)                                      |
| United Arab Emirates | 9350 (8869 to 9857)          | 66292 (62592 to 70302)          | 621 (594 to 649)                                   | 594 (567 to 624)    | -4.4% (-6.7% to -2.6%)                                      |
| Yemen                | 36551 (34139 to 39589)       | 117721 (101299 to 141736)       | 441 (417 to 470)                                   | 525 (456 to 626)    | 18.9% (7.1% to 35.6%)                                       |
| South Asia           | 5841505 (5539892 to 6167668) | 14952502 (14136245 to 15831814) | 750 (714 to 791)                                   | 932 (881 to 986)    | 24.2% (22.8% to 25.6%)                                      |

1

2

3

4

5

6

7

8

9

10

11

12

13

14

15

16

17

18

19

20

21

22

23

24

25

26

27

28

29

30

31

32

33

34

35

36

37

38

39

40

41

42

43

44

45

46

| Location                           | Prevalence                   |                                 |                                                    |                    |                                                             |
|------------------------------------|------------------------------|---------------------------------|----------------------------------------------------|--------------------|-------------------------------------------------------------|
|                                    | Numbers<br>(95% UI)          |                                 | Age-standardized estimates per 100,000<br>(95% UI) |                    | Percentage change of age-standardized<br>estimates (95% UI) |
|                                    | (Year 1990)                  | (Year 2019)                     | (Year 1990)                                        | (Year 2019)        | (Year 1990–Year 2019)                                       |
| <b>South Asia</b>                  | 5841505 (5539892 to 6167668) | 14952502 (14136245 to 15831814) | 750 (714 to 791)                                   | 932 (881 to 986)   | 24.2% (22.8% to 25.6%)                                      |
| Bangladesh                         | 359155 (336447 to 380719)    | 924863 (871564 to 977129)       | 506 (477 to 536)                                   | 616 (581 to 651)   | 21.8% (19.0% to 24.2%)                                      |
| Bhutan                             | 2432 (2303 to 2574)          | 5406 (5119 to 5727)             | 615 (585 to 648)                                   | 791 (752 to 835)   | 28.7% (26.2% to 31.0%)                                      |
| India                              | 5052191 (4789672 to 5335687) | 12795681 (12085618 to 13557100) | 818 (778 to 863)                                   | 1002 (947 to 1060) | 22.4% (21.0% to 23.9%)                                      |
| Nepal                              | 74046 (70671 to 78019)       | 176164 (167511 to 186265)       | 559 (535 to 587)                                   | 673 (641 to 708)   | 20.4% (17.3% to 24.2%)                                      |
| Pakistan                           | 353682 (335994 to 374052)    | 1050389 (989822 to 1114093)     | 480 (457 to 508)                                   | 652 (617 to 692)   | 36.0% (33.6% to 38.9%)                                      |
| <b>Sub-Saharan Africa</b>          | 1206309 (1113585 to 1334495) | 2643504 (2466427 to 2859292)    | 383 (360 to 415)                                   | 385 (361 to 415)   | 0.4% (-2.0% to 2.0%)                                        |
| <b>Southern Sub-Saharan Africa</b> | 133543 (125403 to 142989)    | 194888 (183354 to 208477)       | 364 (342 to 391)                                   | 286 (270 to 306)   | -21.4% (-22.7% to -20.1%)                                   |
| Botswana                           | 2051 (1932 to 2183)          | 5731 (5393 to 6094)             | 242 (229 to 256)                                   | 292 (276 to 310)   | 20.6% (18.7% to 22.7%)                                      |
| Eswatini                           | 1172 (1107 to 1245)          | 2307 (2179 to 2452)             | 252 (239 to 267)                                   | 274 (260 to 292)   | 8.9% (7.2% to 10.8%)                                        |
| Lesotho                            | 2806 (2651 to 2978)          | 4746 (4474 to 5042)             | 220 (209 to 232)                                   | 279 (264 to 296)   | 26.8% (24.6% to 29.4%)                                      |
| Namibia                            | 3194 (2831 to 3755)          | 6029 (5640 to 6500)             | 332 (299 to 379)                                   | 328 (307 to 354)   | -1.2% (-8.6% to 4.2%)                                       |
| South Africa                       | 110769 (103753 to 118832)    | 154867 (145551 to 165941)       | 406 (380 to 437)                                   | 298 (281 to 320)   | -26.5% (-28.0% to -25.1%)                                   |
| Zimbabwe                           | 13552 (12817 to 14370)       | 21208 (20122 to 22513)          | 229 (217 to 242)                                   | 210 (200 to 222)   | -8.3% (-10.1% to -6.6%)                                     |

1  
2  
3  
4  
5  
6  
7  
8  
9  
10  
11  
12  
13  
14  
15  
16  
17  
18  
19  
20  
21  
22  
23  
24  
25  
26  
27  
28  
29  
30  
31  
32  
33  
34  
35  
36  
37  
38  
39  
40  
41  
42  
43  
44  
45  
46

| Location                   | Prevalence                |                             |                                                    |                  |                                                             |
|----------------------------|---------------------------|-----------------------------|----------------------------------------------------|------------------|-------------------------------------------------------------|
|                            | Numbers<br>(95% UI)       |                             | Age-standardized estimates per 100,000<br>(95% UI) |                  | Percentage change of age-standardized<br>estimates (95% UI) |
|                            | (Year 1990)               | (Year 2019)                 | (Year 1990)                                        | (Year 2019)      | (Year 1990–Year 2019)                                       |
| Western Sub-Saharan Africa | 393643 (371506 to 417915) | 1015292 (956643 to 1081707) | 330 (311 to 350)                                   | 369 (348 to 392) | 11.8% (10.9% to 13.2%)                                      |
| Benin                      | 9598 (9087 to 10182)      | 27620 (26060 to 29366)      | 353 (334 to 374)                                   | 380 (359 to 403) | 7.9% (6.3% to 9.8%)                                         |
| Burkina Faso               | 18263 (17286 to 19378)    | 53183 (50128 to 56778)      | 328 (311 to 348)                                   | 405 (382 to 429) | 23.4% (21.6% to 25.3%)                                      |
| Cabo Verde                 | 710 (674 to 749)          | 1773 (1679 to 1885)         | 290 (276 to 307)                                   | 354 (337 to 376) | 22.3% (20.8% to 24.0%)                                      |
| Cameroon                   | 26104 (24567 to 27826)    | 81374 (76604 to 86776)      | 422 (400 to 449)                                   | 452 (427 to 482) | 7.1% (5.3% to 9.0%)                                         |
| Chad                       | 12524 (11163 to 14614)    | 33024 (30732 to 35901)      | 335 (305 to 379)                                   | 392 (366 to 424) | 17.2% (10.9% to 21.6%)                                      |
| Côte d'Ivoire              | 24357 (22908 to 25937)    | 62791 (59003 to 66694)      | 368 (348 to 389)                                   | 383 (362 to 405) | 4.0% (2.4% to 5.8%)                                         |
| Gambia                     | 1701 (1591 to 1821)       | 4441 (4183 to 4719)         | 309 (291 to 328)                                   | 325 (308 to 345) | 5.4% (3.1% to 7.5%)                                         |
| Ghana                      | 34864 (32489 to 37234)    | 105387 (98549 to 112825)    | 378 (353 to 402)                                   | 459 (430 to 490) | 21.6% (19.5% to 23.4%)                                      |
| Guinea                     | 13474 (12693 to 14282)    | 29370 (27691 to 31229)      | 331 (313 to 351)                                   | 388 (366 to 412) | 17.1% (15.3% to 18.8%)                                      |
| Guinea-Bissau              | 2499 (2342 to 2669)       | 5186 (4841 to 5555)         | 412 (387 to 438)                                   | 435 (408 to 465) | 5.7% (3.9% to 8.0%)                                         |
| Liberia                    | 5776 (4553 to 8368)       | 11219 (9845 to 13311)       | 390 (327 to 518)                                   | 356 (316 to 417) | -8.6% (-24.3% to 2.7%)                                      |
| Mali                       | 17615 (16574 to 18798)    | 45061 (41639 to 49459)      | 326 (307 to 345)                                   | 366 (341 to 396) | 12.3% (8.3% to 19.1%)                                       |
| Mauritania                 | 6379 (5995 to 6774)       | 12375 (11593 to 13199)      | 485 (457 to 517)                                   | 455 (426 to 485) | -6.3% (-7.6% to -5.0%)                                      |

1  
2  
3  
4  
5  
6  
7  
8  
9  
10  
11  
12  
13  
14  
15  
16  
17  
18  
19  
20  
21  
22  
23  
24  
25  
26  
27  
28  
29  
30  
31  
32  
33  
34  
35  
36  
37  
38  
39  
40  
41  
42  
43  
44  
45  
46

| Location                          | Prevalence                |                              |                                                    |                   |                                                             |
|-----------------------------------|---------------------------|------------------------------|----------------------------------------------------|-------------------|-------------------------------------------------------------|
|                                   | Numbers<br>(95% UI)       |                              | Age-standardized estimates per 100,000<br>(95% UI) |                   | Percentage change of age-standardized<br>estimates (95% UI) |
|                                   | (Year 1990)               | (Year 2019)                  | (Year 1990)                                        | (Year 2019)       | (Year 1990–Year 2019)                                       |
| Niger                             | 13834 (13043 to 14730)    | 39131 (36861 to 41586)       | 317 (301 to 336)                                   | 333 (316 to 353)  | 5.0% (3.6% to 6.5%)                                         |
| Nigeria                           | 175736 (165268 to 186733) | 424532 (399558 to 453038)    | 303 (286 to 321)                                   | 333 (315 to 354)  | 10.1% (8.7% to 12.1%)                                       |
| Sao Tome and Principe             | 249 (236 to 263)          | 566 (532 to 600)             | 320 (303 to 339)                                   | 388 (366 to 412)  | 21.5% (19.6% to 23.4%)                                      |
| Senegal                           | 14364 (13478 to 15318)    | 34930 (32773 to 37093)       | 324 (305 to 344)                                   | 353 (331 to 374)  | 8.8% (7.1% to 10.5%)                                        |
| Sierra Leone                      | 7733 (7320 to 8213)       | 21506 (19609 to 24323)       | 320 (303 to 339)                                   | 407 (375 to 455)  | 27.4% (19.7% to 40.9%)                                      |
| Togo                              | 7849 (7353 to 8389)       | 21809 (20468 to 23233)       | 381 (357 to 404)                                   | 395 (372 to 420)  | 3.9% (2.6% to 5.3%)                                         |
| <b>Eastern Sub-Saharan Africa</b> | 546626 (484496 to 643421) | 1094872 (1008201 to 1210322) | 451 (413 to 505)                                   | 428 (397 to 471)  | -5.0% (-10.1% to -2.1%)                                     |
| Burundi                           | 16000 (15197 to 16889)    | 60908 (45647 to 85359)       | 459 (438 to 483)                                   | 789 (603 to 1086) | 71.9% (31.1% to 140.3%)                                     |
| Comoros                           | 1424 (1339 to 1511)       | 2971 (2793 to 3151)          | 479 (452 to 507)                                   | 499 (470 to 528)  | 4.2% (2.7% to 5.6%)                                         |
| Djibouti                          | 1146 (1071 to 1236)       | 3775 (3543 to 4045)          | 412 (388 to 438)                                   | 416 (392 to 443)  | 1.0% (-1.2% to 3.2%)                                        |
| Eritrea                           | 17672 (10227 to 30705)    | 23159 (18819 to 30609)       | 775 (498 to 1256)                                  | 538 (430 to 725)  | -30.5% (-44.6% to -12.2%)                                   |
| Ethiopia                          | 205144 (172013 to 260669) | 312469 (285987 to 352276)    | 593 (526 to 692)                                   | 480 (441 to 539)  | -19.0% (-28.0% to -12.5%)                                   |
| Kenya                             | 54192 (51282 to 57168)    | 148313 (140229 to 156661)    | 419 (399 to 441)                                   | 437 (416 to 461)  | 4.4% (3.5% to 5.6%)                                         |

1  
2  
3  
4  
5  
6  
7  
8  
9  
10  
11  
12  
13  
14  
15  
16  
17  
18  
19  
20  
21  
22  
23  
24  
25  
26  
27  
28  
29  
30  
31  
32  
33  
34  
35  
36  
37  
38  
39  
40  
41  
42  
43  
44  
45  
46

| Location                    | Prevalence                |                           |                                                    |                  |                                                             |
|-----------------------------|---------------------------|---------------------------|----------------------------------------------------|------------------|-------------------------------------------------------------|
|                             | Numbers<br>(95% UI)       |                           | Age-standardized estimates per 100,000<br>(95% UI) |                  | Percentage change of age-standardized<br>estimates (95% UI) |
|                             | (Year 1990)               | (Year 2019)               | (Year 1990)                                        | (Year 2019)      | (Year 1990–Year 2019)                                       |
| Madagascar                  | 28958 (27086 to 30958)    | 62457 (58392 to 66781)    | 387 (364 to 410)                                   | 357 (336 to 380) | -7.5% (-9.0% to -6.0%)                                      |
| Malawi                      | 17419 (16343 to 18504)    | 33843 (31621 to 36156)    | 294 (277 to 310)                                   | 292 (274 to 310) | -0.6% (-2.2% to 0.8%)                                       |
| Mozambique                  | 44165 (36287 to 58750)    | 82974 (76744 to 91370)    | 501 (426 to 636)                                   | 496 (460 to 552) | -1.0% (-13.9% to 9.1%)                                      |
| Rwanda                      | 22408 (20656 to 25061)    | 47538 (39579 to 62410)    | 500 (469 to 539)                                   | 540 (451 to 701) | 7.9% (-7.7% to 41.3%)                                       |
| Somalia                     | 15940 (13747 to 22257)    | 45237 (40209 to 53126)    | 355 (319 to 454)                                   | 375 (339 to 433) | 5.4% (-8.1% to 13.4%)                                       |
| South Sudan                 | 16135 (14910 to 17648)    | 26382 (23597 to 30638)    | 449 (419 to 485)                                   | 453 (411 to 514) | 1.0% (-3.6% to 8.3%)                                        |
| Uganda                      | 40438 (33471 to 53028)    | 88572 (81633 to 97593)    | 380 (327 to 475)                                   | 383 (353 to 427) | 0.6% (-10.5% to 9.4%)                                       |
| United Republic of Tanzania | 52426 (49327 to 55790)    | 122702 (115238 to 130321) | 331 (313 to 350)                                   | 338 (320 to 357) | 2.1% (0.6% to 3.4%)                                         |
| Zambia                      | 12756 (11996 to 13624)    | 32697 (30668 to 34830)    | 279 (265 to 296)                                   | 291 (275 to 308) | 4.2% (2.7% to 5.7%)                                         |
| Central Sub-Saharan Africa  | 132497 (122290 to 145589) | 338451 (308212 to 380779) | 367 (344 to 396)                                   | 396 (363 to 441) | 7.8% (4.6% to 12.2%)                                        |
| Angola                      | 35168 (27673 to 46702)    | 84342 (74531 to 99345)    | 482 (401 to 604)                                   | 461 (406 to 544) | -4.3% (-11% to 1.6%)                                        |
| Central African Republic    | 5137 (4892 to 5410)       | 14127 (12332 to 16792)    | 286 (273 to 300)                                   | 372 (333 to 427) | 30.0% (18.1% to 50.3%)                                      |

1  
2  
3  
4  
5  
6  
7  
8  
9  
10  
11  
12  
13  
14  
15  
16  
17  
18  
19  
20  
21  
22  
23  
24  
25  
26  
27  
28  
29  
30  
31  
32  
33  
34  
35  
36  
37  
38  
39  
40  
41  
42  
43  
44  
45  
46

| Location                         | Prevalence             |                           |                                                    |                  |                                                             |
|----------------------------------|------------------------|---------------------------|----------------------------------------------------|------------------|-------------------------------------------------------------|
|                                  | Numbers<br>(95% UI)    |                           | Age-standardized estimates per 100,000<br>(95% UI) |                  | Percentage change of age-standardized<br>estimates (95% UI) |
|                                  | (Year 1990)            | (Year 2019)               | (Year 1990)                                        | (Year 2019)      | (Year 1990–Year 2019)                                       |
| Congo                            | 5269 (5019 to 5530)    | 15760 (13995 to 18395)    | 336 (320 to 352)                                   | 397 (356 to 455) | 18.2% (7.6% to 34.6%)                                       |
| Democratic Republic of the Congo | 83247 (79033 to 87924) | 215440 (199080 to 237463) | 343 (327 to 361)                                   | 376 (350 to 409) | 9.5% (4.2% to 17.7%)                                        |
| Equatorial Guinea                | 853 (813 to 896)       | 3166 (3003 to 3328)       | 305 (291 to 320)                                   | 358 (341 to 376) | 17.2% (14.9% to 19.4%)                                      |
| Gabon                            | 2823 (2700 to 2962)    | 5616 (5359 to 5908)       | 400 (383 to 420)                                   | 403 (386 to 424) | 0.7% (-0.7% to 2.2%)                                        |

Abbreviations: UI, uncertainty interval

Table 10. Years lived with disability for 1990 and 2019 and percentage changes of age-standardized rates by location for traumatic brain injury, 1990–2019

| Location                  | YLD                          |                              |                                                |                  |                                                         |
|---------------------------|------------------------------|------------------------------|------------------------------------------------|------------------|---------------------------------------------------------|
|                           | Numbers<br>(95% UI)          |                              | Age-standardized rates per 100,000<br>(95% UI) |                  | Percentage change of age-standardized rates<br>(95% UI) |
|                           | (Year 1990)                  | (Year 2019)                  | (Year 1990)                                    | (Year 2019)      | (Year 1990–Year 2019)                                   |
| Global                    | 3953933 (2777811 to 5334853) | 7076902 (4997948 to 9588098) | 86 (61 to 117)                                 | 87 (61 to 117)   | 0.1% (-1% to 1.3%)                                      |
| High-income               | 1014882 (712991 to 1373593)  | 1360583 (957111 to 1837205)  | 96 (67 to 130)                                 | 88 (61 to 118)   | -8.9% (-10.1% to -7.7%)                                 |
| High-income North America | 245962 (171414 to 333811)    | 342093 (241165 to 461325)    | 78 (54 to 106)                                 | 69 (48 to 93)    | -11.5% (-13% to -9.8%)                                  |
| Canada                    | 34042 (23793 to 46540)       | 58904 (41426 to 79662)       | 110 (77 to 151)                                | 107 (75 to 144)  | -3.2% (-6.9% to 0.8%)                                   |
| Greenland                 | 36 (25 to 50)                | 37 (26 to 49)                | 73 (51 to 99)                                  | 56 (39 to 75)    | -23.1% (-26.6% to -19.5%)                               |
| United States of America  | 211878 (147546 to 287094)    | 283146 (199948 to 381051)    | 75 (52 to 101)                                 | 65 (45 to 87)    | -13.5% (-15.1% to -11.9%)                               |
| Australasia               | 35580 (25007 to 48065)       | 62658 (44000 to 84416)       | 162 (114 to 219)                               | 166 (115 to 225) | 2.2% (-0.7% to 5.4%)                                    |
| Australia                 | 28806 (20192 to 38986)       | 51733 (36213 to 69985)       | 157 (110 to 212)                               | 162 (112 to 220) | 2.8% (-0.6% to 6.5%)                                    |
| New Zealand               | 6774 (4757 to 9172)          | 10925 (7716 to 14864)        | 186 (131 to 252)                               | 187 (132 to 254) | 0.8% (-2.2% to 4.3%)                                    |
| High-income Asia Pacific  | 165215 (115479 to 223728)    | 222787 (156099 to 301904)    | 84 (59 to 114)                                 | 76 (53 to 104)   | -9.5% (-11.4% to -7.7%)                                 |
| Brunei Darussalam         | 214 (150 to 295)             | 408 (287 to 557)             | 110 (77 to 148)                                | 94 (67 to 128)   | -13.9% (-17.4% to -10.5%)                               |
| Japan                     | 112943 (78986 to 152999)     | 131214 (91583 to 177340)     | 73 (51 to 99)                                  | 61 (43 to 83)    | -16.3% (-17.7% to -14.9%)                               |



| Location          | YLD                       |                           |                                                |                  |                                                         |
|-------------------|---------------------------|---------------------------|------------------------------------------------|------------------|---------------------------------------------------------|
|                   | Numbers<br>(95% UI)       |                           | Age-standardized rates per 100,000<br>(95% UI) |                  | Percentage change of age-standardized rates<br>(95% UI) |
|                   | (Year 1990)               | (Year 2019)               | (Year 1990)                                    | (Year 2019)      | (Year 1990–Year 2019)                                   |
| Republic of Korea | 49224 (34429 to 66793)    | 84408 (58733 to 115371)   | 121 (85 to 165)                                | 111 (78 to 152)  | -8.5% (-12% to -4.9%)                                   |
| Singapore         | 2834 (1964 to 3874)       | 6757 (4714 to 9192)       | 94 (65 to 128)                                 | 92 (64 to 125)   | -2.3% (-6.4% to 1.8%)                                   |
| Western Europe    | 521859 (366129 to 707104) | 655051 (458429 to 881035) | 110 (77 to 149)                                | 100 (70 to 136)  | -8.8% (-10.8% to -6.7%)                                 |
| Andorra           | 72 (50 to 97)             | 153 (107 to 208)          | 124 (87 to 168)                                | 126 (88 to 170)  | 1.5% (-2.4% to 5.6%)                                    |
| Austria           | 12269 (8528 to 16668)     | 14826 (10349 to 20156)    | 127 (88 to 173)                                | 112 (78 to 151)  | -12% (-15.6% to -8.1%)                                  |
| Belgium           | 15634 (10923 to 21080)    | 22555 (15827 to 30372)    | 125 (88 to 170)                                | 132 (91 to 178)  | 4.9% (0.8% to 9.2%)                                     |
| Cyprus            | 826 (581 to 1120)         | 1721 (1213 to 2332)       | 102 (72 to 138)                                | 104 (73 to 141)  | 1.7% (-3.1% to 6.2%)                                    |
| Denmark           | 7755 (5449 to 10493)      | 8047 (5630 to 10829)      | 116 (81 to 156)                                | 99 (69 to 135)   | -14.1% (-18% to -9.9%)                                  |
| Finland           | 9497 (6674 to 12879)      | 12214 (8542 to 16578)     | 155 (109 to 211)                               | 146 (101 to 198) | -6.2% (-9.9% to -2.4%)                                  |
| France            | 92736 (65233 to 125053)   | 122822 (85860 to 166276)  | 132 (93 to 178)                                | 122 (85 to 165)  | -7.7% (-11.7% to -3.9%)                                 |
| Germany           | 110220 (77245 to 149618)  | 135464 (94583 to 183616)  | 108 (75 to 146)                                | 102 (71 to 139)  | -4.9% (-8.9% to -0.4%)                                  |
| Greece            | 14192 (9960 to 19169)     | 14822 (10382 to 20098)    | 113 (79 to 152)                                | 99 (69 to 135)   | -12.1% (-15.9% to -8.2%)                                |
| Iceland           | 286 (201 to 388)          | 453 (317 to 610)          | 107 (75 to 145)                                | 103 (71 to 139)  | -4.3% (-8.4% to 0%)                                     |
| Ireland           | 3737 (2589 to 5076)       | 6046 (4161 to 8182)       | 101 (70 to 137)                                | 99 (68 to 134)   | -1.7% (-6.4% to 3%)                                     |
| Israel            | 4397 (3066 to 5955)       | 9508 (6760 to 13018)      | 93 (65 to 126)                                 | 96 (68 to 131)   | 3.1% (-2.3% to 8.9%)                                    |

1  
2  
3  
4  
5  
6  
7  
8  
9  
10  
11  
12  
13  
14  
15  
16  
17  
18  
19  
20  
21  
22  
23  
24  
25  
26  
27  
28  
29  
30  
31  
32  
33  
34  
35  
36  
37  
38  
39  
40  
41  
42  
43  
44  
45  
46

| Location                      | YLD                     |                         |                                                |                 |                                                         |
|-------------------------------|-------------------------|-------------------------|------------------------------------------------|-----------------|---------------------------------------------------------|
|                               | Numbers<br>(95% UI)     |                         | Age-standardized rates per 100,000<br>(95% UI) |                 | Percentage change of age-standardized rates<br>(95% UI) |
|                               | (Year 1990)             | (Year 2019)             | (Year 1990)                                    | (Year 2019)     | (Year 1990–Year 2019)                                   |
| Italy                         | 86061 (60155 to 116787) | 93736 (66044 to 126346) | 118 (82 to 160)                                | 96 (67 to 131)  | -18.3% (-20% to -16.5%)                                 |
| Luxembourg                    | 615 (432 to 829)        | 963 (676 to 1301)       | 131 (92 to 177)                                | 115 (80 to 156) | -12% (-15.4% to -8.3%)                                  |
| Malta                         | 408 (287 to 553)        | 699 (489 to 938)        | 101 (71 to 136)                                | 111 (78 to 149) | 10% (5.2% to 14.8%)                                     |
| Monaco                        | 22 (16 to 30)           | 29 (20 to 39)           | 51 (36 to 69)                                  | 51 (36 to 70)   | 0.3% (-5% to 5.3%)                                      |
| Netherlands                   | 15909 (11173 to 21703)  | 25119 (17756 to 33892)  | 90 (63 to 123)                                 | 96 (68 to 130)  | 6.8% (2.1% to 11.5%)                                    |
| Norway                        | 3324 (2336 to 4499)     | 3921 (2761 to 5272)     | 63 (44 to 85)                                  | 53 (37 to 71)   | -15.8% (-17.6% to -13.8%)                               |
| Portugal                      | 12329 (8677 to 16672)   | 12024 (8572 to 16421)   | 105 (74 to 142)                                | 72 (51 to 99)   | -30.8% (-34.4% to -27.3%)                               |
| San Marino                    | 16 (11 to 21)           | 24 (17 to 32)           | 57 (40 to 77)                                  | 53 (37 to 72)   | -7.1% (-11.7% to -2.6%)                                 |
| Spain                         | 50036 (35096 to 67824)  | 65877 (45969 to 89448)  | 110 (77 to 149)                                | 97 (68 to 133)  | -11.9% (-16.4% to -7.3%)                                |
| Sweden                        | 6247 (4389 to 8442)     | 7003 (4895 to 9443)     | 56 (40 to 76)                                  | 48 (34 to 65)   | -14.1% (-17.9% to -10.1%)                               |
| Switzerland                   | 13892 (9797 to 18811)   | 17102 (12059 to 23120)  | 158 (111 to 214)                               | 130 (90 to 175) | -17.9% (-21.3% to -14.3%)                               |
| United Kingdom                | 60948 (42742 to 82260)  | 79351 (55900 to 107435) | 87 (61 to 118)                                 | 85 (59 to 115)  | -1.8% (-3.6% to 0%)                                     |
| <b>Southern Latin America</b> | 46267 (32375 to 62358)  | 77994 (55135 to 105285) | 97 (68 to 131)                                 | 104 (74 to 141) | 7.5% (4.2% to 11%)                                      |
| Argentina                     | 31020 (21788 to 41792)  | 50115 (35459 to 67528)  | 96 (68 to 130)                                 | 102 (72 to 137) | 6.1% (1.8% to 10.5%)                                    |
| Chile                         | 11380 (7906 to 15406)   | 23074 (16248 to 30963)  | 95 (66 to 128)                                 | 107 (75 to 144) | 12.8% (8.4% to 17.2%)                                   |

| Location                                                | YLD                        |                            |                                                |                  |                                                         |
|---------------------------------------------------------|----------------------------|----------------------------|------------------------------------------------|------------------|---------------------------------------------------------|
|                                                         | Numbers<br>(95% UI)        |                            | Age-standardized rates per 100,000<br>(95% UI) |                  | Percentage change of age-standardized rates<br>(95% UI) |
|                                                         | (Year 1990)                | (Year 2019)                | (Year 1990)                                    | (Year 2019)      | (Year 1990–Year 2019)                                   |
| Uruguay                                                 | 3865 (2698 to 5241)        | 4802 (3353 to 6507)        | 115 (80 to 156)                                | 116 (81 to 158)  | 1.2% (-3% to 5.6%)                                      |
| <b>Central Europe, Eastern Europe, and Central Asia</b> | 943958 (661605 to 1277133) | 913700 (644818 to 1239156) | 208 (146 to 282)                               | 173 (122 to 235) | -16.9% (-17.9% to -15.9%)                               |
| <b>Eastern Europe</b>                                   | 604907 (424334 to 817583)  | 536447 (376708 to 725229)  | 233 (164 to 316)                               | 193 (136 to 261) | -17.4% (-18.5% to -16.3%)                               |
| Belarus                                                 | 23518 (16376 to 32097)     | 22096 (15455 to 29994)     | 198 (138 to 271)                               | 173 (121 to 235) | -12.8% (-15.6% to -9.9%)                                |
| Estonia                                                 | 4277 (2978 to 5809)        | 2784 (1953 to 3788)        | 235 (164 to 319)                               | 154 (107 to 210) | -34.6% (-37% to -32.1%)                                 |
| Latvia                                                  | 8038 (5651 to 10926)       | 4361 (3084 to 5934)        | 255 (179 to 347)                               | 161 (114 to 220) | -36.9% (-39.1% to -34.7%)                               |
| Lithuania                                               | 10053 (7071 to 13649)      | 7172 (5059 to 9771)        | 242 (170 to 328)                               | 177 (124 to 241) | -26.7% (-29.1% to -24.2%)                               |
| Republic of Moldova                                     | 8505 (5924 to 11540)       | 6673 (4694 to 9089)        | 185 (129 to 252)                               | 138 (98 to 189)  | -25.4% (-27.9% to -22.7%)                               |
| Russian Federation                                      | 415551 (290189 to 561463)  | 387145 (272036 to 522377)  | 243 (170 to 329)                               | 200 (141 to 271) | -17.5% (-18.8% to -16.1%)                               |
| Ukraine                                                 | 134965 (95231 to 182486)   | 106217 (74659 to 143539)   | 216 (152 to 293)                               | 181 (127 to 245) | -16.1% (-18.6% to -13.5%)                               |
| <b>Central Europe</b>                                   | 278598 (195451 to 377346)  | 289346 (203891 to 392223)  | 204 (143 to 276)                               | 185 (130 to 251) | -9.2% (-10.6% to -7.7%)                                 |
| Albania                                                 | 4883 (3432 to 6644)        | 5913 (4153 to 8047)        | 174 (122 to 236)                               | 174 (122 to 238) | 0.2% (-3.5% to 3.6%)                                    |
| Bosnia and Herzegovina                                  | 7424 (5249 to 10029)       | 7966 (5840 to 10686)       | 158 (112 to 213)                               | 180 (131 to 242) | 14% (9.5% to 19.8%)                                     |
| Bulgaria                                                | 20529 (14452 to 27707)     | 16763 (11871 to 22686)     | 196 (137 to 266)                               | 178 (125 to 241) | -9.3% (-12.3% to -6.3%)                                 |
| Croatia                                                 | 13018 (9165 to 17568)      | 13031 (9190 to 17543)      | 225 (158 to 303)                               | 210 (147 to 284) | -6.7% (-10% to -3.7%)                                   |

1  
2

| Location        | YLD                     |                          |                                                |                  |                                                         |
|-----------------|-------------------------|--------------------------|------------------------------------------------|------------------|---------------------------------------------------------|
|                 | Numbers<br>(95% UI)     |                          | Age-standardized rates per 100,000<br>(95% UI) |                  | Percentage change of age-standardized rates<br>(95% UI) |
|                 | (Year 1990)             | (Year 2019)              | (Year 1990)                                    | (Year 2019)      | (Year 1990–Year 2019)                                   |
| Czechia         | 27847 (19624 to 37900)  | 30328 (21306 to 41027)   | 232 (163 to 315)                               | 204 (142 to 277) | -11.8% (-14.7% to -8.7%)                                |
| Hungary         | 27345 (19336 to 37321)  | 24110 (16879 to 32515)   | 216 (152 to 295)                               | 175 (123 to 238) | -18.9% (-21.9% to -15.9%)                               |
| Montenegro      | 1188 (833 to 1615)      | 1451 (1015 to 1975)      | 184 (129 to 250)                               | 184 (129 to 250) | 0.1% (-3.1% to 3.1%)                                    |
| North Macedonia | 3138 (2192 to 4235)     | 4402 (3104 to 5938)      | 153 (107 to 206)                               | 161 (113 to 217) | 5.7% (2.1% to 9.1%)                                     |
| Poland          | 86522 (60412 to 116964) | 101897 (71521 to 138435) | 208 (145 to 282)                               | 193 (135 to 262) | -7.5% (-9.4% to -5.7%)                                  |
| Romania         | 49979 (35005 to 67925)  | 43079 (30195 to 58391)   | 192 (133 to 261)                               | 165 (115 to 223) | -14% (-16.8% to -11.2%)                                 |
| Serbia          | 18768 (13173 to 25405)  | 19024 (13534 to 25615)   | 175 (123 to 238)                               | 167 (118 to 226) | -4.9% (-8.8% to -0.6%)                                  |
| Slovakia        | 11979 (8428 to 16274)   | 14550 (10196 to 19759)   | 212 (149 to 288)                               | 198 (138 to 270) | -6.4% (-9.3% to -3.2%)                                  |
| Slovenia        | 5978 (4228 to 8143)     | 6831 (4851 to 9290)      | 263 (186 to 359)                               | 223 (157 to 303) | -15.4% (-18% to -12.6%)                                 |
| Central Asia    | 60453 (42819 to 81137)  | 87908 (62104 to 118441)  | 104 (74 to 140)                                | 96 (68 to 129)   | -7.9% (-9.8% to -6%)                                    |
| Armenia         | 5275 (3906 to 6815)     | 3855 (2879 to 5035)      | 162 (121 to 210)                               | 107 (80 to 139)  | -34.2% (-39.4% to -29.5%)                               |
| Azerbaijan      | 5777 (3992 to 7870)     | 9254 (6507 to 12554)     | 91 (63 to 123)                                 | 82 (57 to 111)   | -9.9% (-14.1% to -5.4%)                                 |
| Georgia         | 6836 (4788 to 9279)     | 5528 (3927 to 7487)      | 115 (81 to 156)                                | 122 (86 to 164)  | 5.7% (1% to 9.9%)                                       |
| Kazakhstan      | 17806 (12422 to 24221)  | 22119 (15369 to 29968)   | 118 (82 to 160)                                | 116 (80 to 156)  | -1.7% (-5.4% to 2.1%)                                   |
| Kyrgyzstan      | 3840 (2694 to 5235)     | 5357 (3746 to 7331)      | 106 (74 to 144)                                | 90 (63 to 123)   | -14.6% (-18.4% to -10.7%)                               |
| Mongolia        | 1364 (945 to 1859)      | 3614 (2527 to 4944)      | 88 (61 to 120)                                 | 108 (76 to 148)  | 23.6% (18.8% to 28.9%)                                  |

40  
41  
42  
43  
44  
45  
46

| Location                           | YLD                       |                           |                                                |                 |                                                         |
|------------------------------------|---------------------------|---------------------------|------------------------------------------------|-----------------|---------------------------------------------------------|
|                                    | Numbers<br>(95% UI)       |                           | Age-standardized rates per 100,000<br>(95% UI) |                 | Percentage change of age-standardized rates<br>(95% UI) |
|                                    | (Year 1990)               | (Year 2019)               | (Year 1990)                                    | (Year 2019)     | (Year 1990–Year 2019)                                   |
| Tajikistan                         | 3561 (2505 to 4843)       | 6424 (4676 to 8702)       | 94 (65 to 128)                                 | 79 (58 to 107)  | -15.4% (-20.4% to -7.8%)                                |
| Turkmenistan                       | 2302 (1611 to 3128)       | 3832 (2673 to 5211)       | 83 (58 to 112)                                 | 78 (54 to 105)  | -6.2% (-10.7% to -1.7%)                                 |
| Uzbekistan                         | 13692 (9568 to 18537)     | 27924 (19438 to 38027)    | 88 (61 to 119)                                 | 88 (61 to 120)  | 0.8% (-3.4% to 5.3%)                                    |
| <b>Latin America and Caribbean</b> | 202620 (142813 to 272345) | 373193 (262150 to 502419) | 66 (47 to 88)                                  | 61 (43 to 83)   | -6.6% (-8.6% to -4.9%)                                  |
| <b>Central Latin America</b>       | 102992 (73993 to 138066)  | 181186 (127975 to 243118) | 83 (59 to 110)                                 | 72 (51 to 97)   | -12.9% (-15.1% to -11.1%)                               |
| Colombia                           | 31423 (22333 to 42234)    | 49058 (34579 to 66389)    | 121 (86 to 162)                                | 96 (67 to 129)  | -21% (-24.8% to -17.4%)                                 |
| Costa Rica                         | 2074 (1433 to 2814)       | 4616 (3252 to 6244)       | 88 (61 to 119)                                 | 90 (64 to 122)  | 3.2% (-0.9% to 7.2%)                                    |
| El Salvador                        | 5041 (3605 to 6925)       | 6163 (4489 to 8066)       | 120 (87 to 163)                                | 101 (74 to 133) | -15.3% (-27% to -5.2%)                                  |
| Guatemala                          | 4717 (3396 to 6407)       | 11867 (8491 to 15982)     | 82 (59 to 110)                                 | 82 (58 to 110)  | -0.3% (-11.1% to 8.3%)                                  |
| Honduras                           | 2410 (1669 to 3256)       | 6477 (4576 to 8738)       | 75 (52 to 101)                                 | 80 (57 to 107)  | 6.2% (1.4% to 11.5%)                                    |
| Mexico                             | 38323 (26631 to 51746)    | 66975 (46700 to 90175)    | 61 (43 to 82)                                  | 53 (37 to 72)   | -12.8% (-14.3% to -11.4%)                               |
| Nicaragua                          | 2797 (1946 to 4012)       | 4465 (3234 to 5975)       | 100 (71 to 140)                                | 79 (57 to 105)  | -20.8% (-32.2% to -10.6%)                               |
| Panama                             | 1668 (1182 to 2235)       | 3399 (2382 to 4556)       | 85 (60 to 114)                                 | 81 (57 to 109)  | -4.9% (-9.2% to -0.5%)                                  |
| Venezuela (Bolivarian Republic of) | 14538 (10051 to 19674)    | 28166 (19857 to 38293)    | 99 (69 to 133)                                 | 95 (67 to 129)  | -4.1% (-8.1% to 0.1%)                                   |
| <b>Andean Latin America</b>        | 17095 (12192 to 23048)    | 38002 (26845 to 51360)    | 59 (42 to 79)                                  | 62 (44 to 84)   | 5.8% (1.3% to 10.1%)                                    |
| Bolivia (Plurinational State of)   | 2475 (1709 to 3360)       | 5668 (3998 to 7760)       | 53 (37 to 71)                                  | 54 (38 to 74)   | 2% (-3.6% to 7.7%)                                      |

1  
2  
3  
4  
5  
6  
7  
8  
9  
10  
11  
12  
13  
14  
15  
16  
17  
18  
19  
20  
21  
22  
23  
24  
25  
26  
27  
28  
29  
30  
31  
32  
33  
34  
35  
36  
37  
38  
39  
40  
41  
42  
43  
44  
45  
46

| Location                         | YLD                    |                        |                                                |                |                                                         |
|----------------------------------|------------------------|------------------------|------------------------------------------------|----------------|---------------------------------------------------------|
|                                  | Numbers<br>(95% UI)    |                        | Age-standardized rates per 100,000<br>(95% UI) |                | Percentage change of age-standardized rates<br>(95% UI) |
|                                  | (Year 1990)            | (Year 2019)            | (Year 1990)                                    | (Year 2019)    | (Year 1990–Year 2019)                                   |
| Ecuador                          | 4968 (3561 to 6674)    | 11962 (8388 to 16108)  | 66 (47 to 89)                                  | 72 (51 to 97)  | 9.1% (3.8% to 14.4%)                                    |
| Peru                             | 9652 (6881 to 13116)   | 20373 (14499 to 27345) | 57 (41 to 78)                                  | 60 (43 to 81)  | 4.9% (-1.7% to 11.4%)                                   |
| <b>Caribbean</b>                 | 22600 (15774 to 30498) | 40644 (28816 to 54647) | 74 (52 to 100)                                 | 81 (57 to 109) | 9% (5.7% to 13.4%)                                      |
| Antigua and Barbuda              | 37 (25 to 50)          | 72 (51 to 98)          | 66 (46 to 90)                                  | 71 (50 to 96)  | 7.3% (2.2% to 12.3%)                                    |
| Bahamas                          | 157 (110 to 216)       | 310 (218 to 421)       | 72 (50 to 98)                                  | 75 (52 to 101) | 3.8% (-1.1% to 9%)                                      |
| Barbados                         | 166 (116 to 225)       | 252 (176 to 342)       | 64 (44 to 86)                                  | 66 (46 to 90)  | 3.8% (-1.4% to 9%)                                      |
| Belize                           | 95 (66 to 130)         | 298 (211 to 407)       | 73 (51 to 99)                                  | 82 (58 to 111) | 12.6% (7.8% to 17.7%)                                   |
| Bermuda                          | 36 (25 to 49)          | 45 (31 to 61)          | 54 (37 to 74)                                  | 50 (35 to 68)  | -6.6% (-11.8% to -1%)                                   |
| Cuba                             | 10126 (7061 to 13687)  | 14632 (10260 to 19851) | 94 (65 to 127)                                 | 93 (66 to 126) | -0.4% (-5.1% to 4.2%)                                   |
| Dominica                         | 42 (29 to 57)          | 55 (39 to 75)          | 64 (44 to 86)                                  | 70 (49 to 95)  | 10.1% (5.5% to 15%)                                     |
| Dominican Republic               | 3741 (2608 to 5083)    | 9454 (6610 to 12921)   | 69 (48 to 94)                                  | 90 (63 to 123) | 30% (24.1% to 36.1%)                                    |
| Grenada                          | 45 (32 to 61)          | 80 (56 to 108)         | 64 (45 to 85)                                  | 71 (50 to 96)  | 11.3% (3.9% to 18.3%)                                   |
| Guyana                           | 374 (264 to 510)       | 561 (392 to 763)       | 63 (44 to 85)                                  | 76 (53 to 103) | 20.2% (14.4% to 25.9%)                                  |
| Haiti                            | 2680 (1858 to 3638)    | 7284 (5476 to 9644)    | 56 (39 to 76)                                  | 69 (52 to 91)  | 23.2% (10.8% to 41.9%)                                  |
| Jamaica                          | 1176 (817 to 1584)     | 1858 (1294 to 2526)    | 59 (41 to 80)                                  | 62 (43 to 84)  | 4.8% (-0.7% to 10.9%)                                   |
| Puerto Rico                      | 2108 (1465 to 2874)    | 2444 (1722 to 3287)    | 58 (41 to 80)                                  | 51 (36 to 69)  | -12.5% (-17.1% to -7%)                                  |
| Saint Kitts and Nevis            | 17 (12 to 23)          | 34 (24 to 46)          | 47 (33 to 64)                                  | 50 (35 to 67)  | 8% (3.1% to 13.3%)                                      |
| Saint Lucia                      | 72 (50 to 98)          | 149 (105 to 202)       | 67 (47 to 91)                                  | 72 (51 to 98)  | 4.7% (-0.9% to 10.7%)                                   |
| Saint Vincent and the Grenadines | 51 (36 to 69)          | 84 (59 to 114)         | 60 (42 to 80)                                  | 66 (46 to 90)  | 10.6% (5% to 16.9%)                                     |
| Suriname                         | 222 (155 to 301)       | 432 (305 to 583)       | 67 (47 to 91)                                  | 71 (50 to 96)  | 5.5% (-1.5% to 11.3%)                                   |

| Location                                      | YLD                       |                             |                                                |                |                                                         |
|-----------------------------------------------|---------------------------|-----------------------------|------------------------------------------------|----------------|---------------------------------------------------------|
|                                               | Numbers<br>(95% UI)       |                             | Age-standardized rates per 100,000<br>(95% UI) |                | Percentage change of age-standardized rates<br>(95% UI) |
|                                               | (Year 1990)               | (Year 2019)                 | (Year 1990)                                    | (Year 2019)    | (Year 1990–Year 2019)                                   |
| Trinidad and Tobago                           | 647 (447 to 872)          | 1160 (818 to 1573)          | 62 (43 to 83)                                  | 70 (49 to 95)  | 13.5% (7.8% to 19.7%)                                   |
| United States Virgin Islands                  | 57 (40 to 79)             | 64 (45 to 87)               | 56 (39 to 76)                                  | 47 (33 to 64)  | -14.9% (-19.5% to -9.8%)                                |
| <b>Tropical Latin America</b>                 | 59933 (41675 to 80749)    | 113361 (79088 to 154099)    | 49 (34 to 65)                                  | 46 (32 to 63)  | -5.1% (-8.5% to -1.6%)                                  |
| Brazil                                        | 57701 (40149 to 77611)    | 108257 (75602 to 147092)    | 48 (33 to 64)                                  | 45 (32 to 61)  | -5.7% (-9.2% to -2.2%)                                  |
| Paraguay                                      | 2231 (1540 to 3049)       | 5103 (3604 to 6965)         | 74 (52 to 101)                                 | 78 (55 to 107) | 5.8% (0.9% to 10.9%)                                    |
| <b>Southeast Asia, East Asia, and Oceania</b> | 558047 (390436 to 759042) | 1403425 (994536 to 1907325) | 39 (27 to 52)                                  | 53 (38 to 72)  | 37.8% (35.3% to 40.5%)                                  |
| <b>East Asia</b>                              | 331950 (231139 to 451082) | 961990 (676389 to 1304904)  | 31 (22 to 42)                                  | 49 (34 to 66)  | 57.4% (53.8% to 61.4%)                                  |
| China                                         | 310524 (216428 to 421804) | 928651 (653288 to 1259096)  | 30 (21 to 41)                                  | 49 (34 to 66)  | 62.2% (58.4% to 66.3%)                                  |
| Democratic People's Republic of Korea         | 8365 (5757 to 11421)      | 14583 (10154 to 20004)      | 44 (30 to 59)                                  | 46 (32 to 63)  | 5.6% (-1% to 11.3%)                                     |
| Taiwan (Province of China)                    | 13062 (9050 to 17766)     | 18755 (13050 to 25434)      | 70 (49 to 95)                                  | 54 (38 to 74)  | -22.2% (-26.2% to -17.8%)                               |
| <b>Southeast Asia</b>                         | 223869 (157515 to 304129) | 435373 (313813 to 588454)   | 62 (44 to 84)                                  | 64 (46 to 86)  | 2.2% (-0.2% to 5%)                                      |
| Cambodia                                      | 4888 (3284 to 7407)       | 10450 (7541 to 14233)       | 67 (47 to 97)                                  | 72 (52 to 97)  | 7.1% (-14% to 22.2%)                                    |
| Indonesia                                     | 68162 (47545 to 93357)    | 111645 (79306 to 151466)    | 47 (33 to 65)                                  | 43 (30 to 58)  | -9.7% (-12.4% to -6.3%)                                 |
| Lao People's Democratic Republic              | 1835 (1274 to 2511)       | 3769 (2634 to 5135)         | 62 (43 to 84)                                  | 62 (44 to 85)  | 0.8% (-4.7% to 5.8%)                                    |

| Location                         | YLD                    |                         |                                                |                |                                                         |
|----------------------------------|------------------------|-------------------------|------------------------------------------------|----------------|---------------------------------------------------------|
|                                  | Numbers<br>(95% UI)    |                         | Age-standardized rates per 100,000<br>(95% UI) |                | Percentage change of age-standardized rates<br>(95% UI) |
|                                  | (Year 1990)            | (Year 2019)             | (Year 1990)                                    | (Year 2019)    | (Year 1990–Year 2019)                                   |
| Malaysia                         | 10197 (7057 to 13976)  | 25949 (18147 to 35442)  | 76 (53 to 104)                                 | 84 (59 to 115) | 10.3% (5.3% to 15.3%)                                   |
| Maldives                         | 74 (52 to 101)         | 284 (204 to 386)        | 53 (37 to 72)                                  | 60 (43 to 81)  | 12.5% (6.6% to 19.3%)                                   |
| Mauritius                        | 383 (267 to 524)       | 709 (497 to 965)        | 40 (28 to 54)                                  | 44 (31 to 61)  | 12.2% (4.5% to 19.1%)                                   |
| Myanmar                          | 20691 (14652 to 28025) | 37979 (28490 to 49831)  | 64 (46 to 87)                                  | 71 (53 to 93)  | 10.9% (2.5% to 24.2%)                                   |
| Philippines                      | 30614 (21882 to 41001) | 63439 (45829 to 85592)  | 68 (48 to 90)                                  | 65 (47 to 87)  | -4.1% (-6.3% to -2.2%)                                  |
| Seychelles                       | 27 (18 to 36)          | 56 (39 to 76)           | 43 (30 to 58)                                  | 48 (33 to 64)  | 10.9% (4.4% to 17.5%)                                   |
| Sri Lanka                        | 10643 (7574 to 14518)  | 21080 (15551 to 27555)  | 73 (52 to 99)                                  | 86 (64 to 113) | 18.1% (10.3% to 28.9%)                                  |
| Thailand                         | 42422 (29573 to 58447) | 70147 (49354 to 94871)  | 86 (61 to 118)                                 | 76 (53 to 103) | -12.6% (-16.4% to -8.8%)                                |
| Timor-Leste                      | 404 (288 to 557)       | 722 (530 to 963)        | 70 (51 to 94)                                  | 73 (53 to 97)  | 4.9% (-1.2% to 11.4%)                                   |
| Viet Nam                         | 33231 (23150 to 45336) | 88575 (62570 to 120852) | 66 (46 to 91)                                  | 86 (61 to 117) | 29.2% (23.7% to 35.1%)                                  |
| <b>Oceania</b>                   | 2228 (1554 to 3027)    | 6062 (4359 to 8110)     | 49 (34 to 67)                                  | 59 (42 to 79)  | 19.7% (14.7% to 25.6%)                                  |
| American Samoa                   | 13 (9 to 18)           | 20 (15 to 27)           | 39 (27 to 52)                                  | 38 (29 to 50)  | -0.6% (-8.2% to 10.3%)                                  |
| Cook Islands                     | 8 (5 to 10)            | 9 (7 to 12)             | 49 (35 to 67)                                  | 43 (30 to 58)  | -12.5% (-17.6% to -7.7%)                                |
| Fiji                             | 254 (176 to 347)       | 404 (285 to 550)        | 43 (30 to 59)                                  | 46 (32 to 62)  | 5.3% (-0.5% to 11.6%)                                   |
| Guam                             | 50 (35 to 68)          | 71 (49 to 96)           | 44 (31 to 60)                                  | 39 (27 to 53)  | -11.9% (-16.9% to -6.8%)                                |
| Kiribati                         | 19 (14 to 26)          | 36 (25 to 49)           | 34 (24 to 46)                                  | 36 (26 to 49)  | 5.7% (-1.6% to 12.9%)                                   |
| Marshall Islands                 | 13 (9 to 18)           | 25 (17 to 34)           | 50 (34 to 67)                                  | 51 (36 to 69)  | 3.6% (-1.8% to 9%)                                      |
| Micronesia (Federated States of) | 34 (24 to 47)          | 49 (34 to 66)           | 50 (35 to 67)                                  | 54 (38 to 73)  | 8.2% (2.2% to 14.5%)                                    |



1  
2  
3  
4  
5  
6  
7  
8  
9  
10  
11  
12  
13  
14  
15  
16  
17  
18  
19  
20  
21  
22  
23  
24  
25  
26  
27  
28  
29  
30  
31  
32  
33  
34  
35  
36  
37  
38  
39  
40  
41  
42  
43  
44  
45  
46

| Location                     | YLD                       |                           |                                                |                 |                                                         |
|------------------------------|---------------------------|---------------------------|------------------------------------------------|-----------------|---------------------------------------------------------|
|                              | Numbers<br>(95% UI)       |                           | Age-standardized rates per 100,000<br>(95% UI) |                 | Percentage change of age-standardized rates<br>(95% UI) |
|                              | (Year 1990)               | (Year 2019)               | (Year 1990)                                    | (Year 2019)     | (Year 1990–Year 2019)                                   |
| Nauru                        | 3 (2 to 4)                | 3 (2 to 4)                | 41 (28 to 56)                                  | 40 (28 to 55)   | -1.4% (-7% to 5.1%)                                     |
| Niue                         | 1 (1 to 1)                | 1 (1 to 1)                | 37 (26 to 51)                                  | 39 (28 to 52)   | 4.2% (-2.8% to 11.9%)                                   |
| Northern Mariana Islands     | 19 (13 to 26)             | 22 (16 to 30)             | 53 (37 to 72)                                  | 42 (30 to 57)   | -20.1% (-24.4% to -15.6%)                               |
| Palau                        | 6 (4 to 8)                | 10 (7 to 14)              | 44 (31 to 59)                                  | 45 (32 to 61)   | 3.1% (-2.3% to 8.7%)                                    |
| Papua New Guinea             | 1430 (996 to 1950)        | 4562 (3302 to 6098)       | 51 (36 to 69)                                  | 63 (45 to 84)   | 23% (16.5% to 30.4%)                                    |
| Samoa                        | 62 (43 to 84)             | 114 (84 to 150)           | 53 (37 to 72)                                  | 64 (47 to 85)   | 20.6% (13% to 30.8%)                                    |
| Solomon Islands              | 112 (78 to 152)           | 284 (200 to 381)          | 53 (37 to 72)                                  | 60 (42 to 81)   | 12% (6.4% to 18.1%)                                     |
| Tokelau                      | 0 (0 to 1)                | 0 (0 to 1)                | 34 (23 to 46)                                  | 36 (25 to 48)   | 5.7% (0.1% to 12.2%)                                    |
| Tonga                        | 32 (23 to 44)             | 41 (29 to 55)             | 46 (33 to 63)                                  | 46 (33 to 63)   | 0.4% (-5.5% to 7.6%)                                    |
| Tuvalu                       | 3 (2 to 4)                | 4 (3 to 5)                | 34 (23 to 46)                                  | 36 (25 to 48)   | 16.2% (9.2% to 25%)                                     |
| Vanuatu                      | 46 (32 to 62)             | 120 (87 to 160)           | 45 (31 to 60)                                  | 52 (37 to 69)   | 5.9% (-0.4% to 13.1%)                                   |
| North Africa and Middle East | 201450 (145412 to 269033) | 453033 (331629 to 604021) | 79 (57 to 104)                                 | 80 (59 to 107)  | 1.9% (-3.5% to 5.4%)                                    |
| North Africa and Middle East | 201450 (145412 to 269033) | 453033 (331629 to 604021) | 79 (57 to 104)                                 | 80 (59 to 107)  | 1.9% (-3.5% to 5.4%)                                    |
| Afghanistan                  | 11856 (5273 to 28707)     | 25411 (16490 to 40529)    | 129 (60 to 299)                                | 106 (66 to 177) | -18.2% (-43.5% to 22.8%)                                |
| Algeria                      | 14814 (10463 to 20007)    | 29937 (21475 to 40072)    | 83 (58 to 112)                                 | 74 (53 to 99)   | -10.6% (-14.9% to -6%)                                  |
| Bahrain                      | 293 (204 to 395)          | 1239 (871 to 1704)        | 69 (48 to 93)                                  | 71 (50 to 97)   | 3.6% (-2.3% to 9.8%)                                    |
| Egypt                        | 24219 (16935 to 32991)    | 50341 (35383 to 68471)    | 56 (40 to 76)                                  | 59 (41 to 79)   | 4% (-2.1% to 10.7%)                                     |
| Iran (Islamic Republic of)   | 46118 (33452 to 61797)    | 70192 (52341 to 93184)    | 111 (81 to 147)                                | 80 (60 to 106)  | -28.1% (-34.8% to -23.2%)                               |

1  
2  
3  
4  
5  
6  
7  
8  
9  
10  
11  
12  
13  
14  
15  
16  
17  
18  
19  
20  
21  
22  
23  
24  
25  
26  
27  
28  
29  
30  
31  
32  
33  
34  
35  
36  
37  
38  
39  
40  
41  
42  
43  
44  
45  
46

| Location             | YLD                    |                        |                                                |                  |                                                         |
|----------------------|------------------------|------------------------|------------------------------------------------|------------------|---------------------------------------------------------|
|                      | Numbers<br>(95% UI)    |                        | Age-standardized rates per 100,000<br>(95% UI) |                  | Percentage change of age-standardized rates<br>(95% UI) |
|                      | (Year 1990)            | (Year 2019)            | (Year 1990)                                    | (Year 2019)      | (Year 1990–Year 2019)                                   |
| Iraq                 | 15785 (10889 to 22572) | 37310 (26823 to 50871) | 132 (90 to 187)                                | 106 (76 to 143)  | -19.9% (-30.1% to -10.6%)                               |
| Jordan               | 1528 (1062 to 2076)    | 5884 (4095 to 7991)    | 62 (43 to 84)                                  | 59 (41 to 80)    | -3.9% (-8.6% to 1%)                                     |
| Kuwait               | 1316 (926 to 1822)     | 3711 (2638 to 5012)    | 92 (65 to 126)                                 | 81 (58 to 109)   | -12% (-18% to -6.7%)                                    |
| Lebanon              | 3035 (1991 to 4851)    | 4026 (2849 to 5569)    | 109 (72 to 173)                                | 76 (54 to 105)   | -30.4% (-42.8% to -18%)                                 |
| Libya                | 2352 (1663 to 3166)    | 6320 (4603 to 8529)    | 83 (59 to 112)                                 | 91 (66 to 123)   | 9.9% (3.2% to 18.6%)                                    |
| Morocco              | 14032 (9792 to 19007)  | 26514 (18727 to 35851) | 72 (50 to 98)                                  | 74 (52 to 100)   | 2.5% (-2.9% to 7.6%)                                    |
| Oman                 | 1432 (995 to 1957)     | 4246 (2938 to 5805)    | 106 (74 to 144)                                | 100 (70 to 136)  | -5.4% (-9.6% to -0.8%)                                  |
| Palestine            | 1291 (914 to 1828)     | 3728 (2642 to 5148)    | 88 (64 to 122)                                 | 97 (69 to 133)   | 10.2% (2.1% to 17.8%)                                   |
| Qatar                | 434 (302 to 599)       | 2857 (1994 to 3911)    | 109 (76 to 149)                                | 97 (68 to 132)   | -10.5% (-14.8% to -6.2%)                                |
| Saudi Arabia         | 13403 (9420 to 18276)  | 55075 (38616 to 75312) | 125 (88 to 170)                                | 156 (109 to 212) | 25% (20.1% to 29.7%)                                    |
| Sudan                | 4890 (3454 to 6758)    | 10734 (7768 to 14444)  | 35 (25 to 48)                                  | 37 (27 to 50)    | 4.9% (-1.9% to 12.7%)                                   |
| Syrian Arab Republic | 4817 (3388 to 6570)    | 15764 (10567 to 23012) | 56 (40 to 76)                                  | 116 (76 to 170)  | 107.7% (51.8% to 211.9%)                                |
| Tunisia              | 4665 (3256 to 6345)    | 9380 (6559 to 12772)   | 71 (49 to 96)                                  | 73 (51 to 99)    | 3.5% (-1.5% to 8.8%)                                    |
| Turkey               | 28204 (19754 to 38200) | 62842 (45196 to 84968) | 58 (41 to 79)                                  | 69 (50 to 93)    | 18.9% (12.6% to 26.1%)                                  |
| United Arab Emirates | 1418 (986 to 1951)     | 9976 (6962 to 13671)   | 92 (64 to 125)                                 | 87 (61 to 119)   | -4.9% (-9.5% to 0%)                                     |
| Yemen                | 5412 (3882 to 7267)    | 17087 (12086 to 23384) | 64 (46 to 87)                                  | 75 (54 to 101)   | 16.7% (4.8% to 33.9%)                                   |

| Location                    | YLD                        |                              |                                                |                  |                                                         |
|-----------------------------|----------------------------|------------------------------|------------------------------------------------|------------------|---------------------------------------------------------|
|                             | Numbers<br>(95% UI)        |                              | Age-standardized rates per 100,000<br>(95% UI) |                  | Percentage change of age-standardized rates<br>(95% UI) |
|                             | (Year 1990)                | (Year 2019)                  | (Year 1990)                                    | (Year 2019)      | (Year 1990–Year 2019)                                   |
| South Asia                  | 860069 (604623 to 1163495) | 2190818 (1536215 to 2967664) | 109 (77 to 147)                                | 135 (95 to 183)  | 24.4% (22.8% to 26.1%)                                  |
| South Asia                  | 860069 (604623 to 1163495) | 2190818 (1536215 to 2967664) | 109 (77 to 147)                                | 135 (95 to 183)  | 24.4% (22.8% to 26.1%)                                  |
| Bangladesh                  | 53822 (37633 to 73397)     | 137433 (96855 to 186188)     | 75 (52 to 102)                                 | 91 (64 to 123)   | 22% (16.9% to 27.6%)                                    |
| Bhutan                      | 364 (257 to 500)           | 802 (568 to 1096)            | 90 (63 to 123)                                 | 116 (82 to 158)  | 28.5% (23.3% to 34.2%)                                  |
| India                       | 742455 (522650 to 1003627) | 1870307 (1310196 to 2531657) | 118 (83 to 160)                                | 145 (102 to 196) | 22.9% (21.2% to 24.6%)                                  |
| Nepal                       | 10938 (7623 to 14857)      | 25880 (18657 to 34764)       | 81 (57 to 110)                                 | 98 (71 to 132)   | 20.5% (15.2% to 26.7%)                                  |
| Pakistan                    | 52490 (36788 to 71199)     | 156397 (110431 to 211564)    | 70 (49 to 95)                                  | 96 (68 to 129)   | 36% (32.2% to 40.3%)                                    |
| Sub-Saharan Africa          | 172908 (123072 to 233849)  | 382150 (275687 to 515793)    | 54 (39 to 74)                                  | 55 (39 to 73)    | 0.8% (-1.4% to 2.6%)                                    |
| Southern Sub-Saharan Africa | 18861 (13201 to 25332)     | 27272 (19047 to 36610)       | 51 (36 to 68)                                  | 40 (28 to 53)    | -22% (-24% to -20%)                                     |
| Botswana                    | 290 (201 to 397)           | 807 (560 to 1087)            | 34 (24 to 46)                                  | 40 (28 to 54)    | 19.6% (12.7% to 26.9%)                                  |
| Eswatini                    | 166 (116 to 225)           | 324 (226 to 442)             | 35 (24 to 47)                                  | 38 (27 to 51)    | 7.6% (1.7% to 14%)                                      |
| Lesotho                     | 395 (274 to 534)           | 664 (463 to 898)             | 31 (22 to 41)                                  | 38 (27 to 52)    | 25.3% (17.5% to 33.6%)                                  |
| Namibia                     | 446 (322 to 597)           | 848 (603 to 1142)            | 46 (33 to 61)                                  | 46 (33 to 61)    | -1% (-9.7% to 6.7%)                                     |
| South Africa                | 15640 (10926 to 21082)     | 21643 (15178 to 28943)       | 57 (40 to 76)                                  | 41 (29 to 55)    | -27.1% (-29.1% to -24.8%)                               |
| Zimbabwe                    | 1923 (1333 to 2632)        | 2988 (2099 to 4074)          | 32 (22 to 43)                                  | 29 (20 to 39)    | -9.1% (-14.8% to -3.1%)                                 |

1  
2  
3  
4  
5  
6  
7  
8  
9  
10  
11  
12  
13  
14  
15  
16  
17  
18  
19  
20  
21  
22  
23  
24  
25  
26  
27  
28  
29  
30  
31  
32  
33  
34  
35  
36  
37  
38  
39  
40  
41  
42  
43  
44  
45  
46

| Location                   | YLD                    |                           |                                                |               |                                                         |
|----------------------------|------------------------|---------------------------|------------------------------------------------|---------------|---------------------------------------------------------|
|                            | Numbers<br>(95% UI)    |                           | Age-standardized rates per 100,000<br>(95% UI) |               | Percentage change of age-standardized rates<br>(95% UI) |
|                            | (Year 1990)            | (Year 2019)               | (Year 1990)                                    | (Year 2019)   | (Year 1990–Year 2019)                                   |
| Western Sub-Saharan Africa | 56254 (39560 to 76157) | 146349 (103313 to 197859) | 47 (33 to 63)                                  | 52 (37 to 70) | 12.4% (11.1% to 14.1%)                                  |
| Benin                      | 1374 (955 to 1870)     | 4004 (2807 to 5466)       | 50 (35 to 68)                                  | 54 (38 to 73) | 8.8% (3.5% to 14.6%)                                    |
| Burkina Faso               | 2600 (1819 to 3556)    | 7705 (5360 to 10461)      | 46 (32 to 62)                                  | 58 (40 to 78) | 25.2% (19.5% to 31.5%)                                  |
| Cabo Verde                 | 101 (70 to 137)        | 254 (177 to 344)          | 41 (29 to 56)                                  | 50 (35 to 68) | 22.4% (15.8% to 29.1%)                                  |
| Cameroon                   | 3755 (2637 to 5061)    | 11816 (8246 to 16095)     | 60 (42 to 81)                                  | 64 (46 to 88) | 7.8% (3.1% to 13%)                                      |
| Chad                       | 1764 (1273 to 2365)    | 4729 (3386 to 6432)       | 47 (34 to 63)                                  | 55 (40 to 74) | 17.9% (9.9% to 25.4%)                                   |
| Côte d'Ivoire              | 3492 (2397 to 4736)    | 9078 (6327 to 12400)      | 52 (36 to 70)                                  | 54 (38 to 73) | 5.2% (0.1% to 10.7%)                                    |
| Gambia                     | 244 (173 to 331)       | 638 (451 to 866)          | 44 (31 to 59)                                  | 46 (33 to 63) | 5.5% (-0.3% to 10.9%)                                   |
| Ghana                      | 5052 (3515 to 6960)    | 15368 (10684 to 20817)    | 54 (38 to 73)                                  | 66 (46 to 89) | 22.3% (16.8% to 28.2%)                                  |
| Guinea                     | 1931 (1370 to 2598)    | 4240 (2937 to 5743)       | 47 (33 to 63)                                  | 55 (38 to 74) | 17.4% (11.5% to 23.4%)                                  |
| Guinea-Bissau              | 361 (250 to 492)       | 754 (523 to 1012)         | 58 (41 to 79)                                  | 62 (43 to 84) | 6.1% (1.4% to 11.3%)                                    |
| Liberia                    | 782 (513 to 1233)      | 1578 (1139 to 2109)       | 53 (36 to 78)                                  | 49 (36 to 66) | -7.3% (-22.1% to 4.6%)                                  |
| Mali                       | 2508 (1739 to 3419)    | 6452 (4613 to 8736)       | 46 (32 to 62)                                  | 52 (37 to 70) | 12.8% (5.9% to 21.5%)                                   |
| Mauritania                 | 926 (640 to 1265)      | 1800 (1249 to 2459)       | 70 (49 to 95)                                  | 65 (46 to 89) | -6.2% (-10.4% to -1.6%)                                 |
| Niger                      | 1989 (1391 to 2690)    | 5650 (3980 to 7687)       | 45 (31 to 61)                                  | 47 (33 to 64) | 5.3% (-0.3% to 10.8%)                                   |
| Nigeria                    | 25033 (17488 to 33851) | 60912 (42958 to 82353)    | 43 (30 to 57)                                  | 47 (33 to 63) | 10.4% (8.8% to 12.8%)                                   |
| Sao Tome and Principe      | 36 (25 to 48)          | 82 (57 to 111)            | 45 (32 to 61)                                  | 55 (38 to 75) | 21.6% (15.4% to 28.1%)                                  |
| Senegal                    | 2061 (1436 to 2812)    | 5031 (3527 to 6891)       | 46 (32 to 62)                                  | 50 (35 to 68) | 9.1% (3.6% to 14.7%)                                    |
| Sierra Leone               | 1105 (770 to 1503)     | 3084 (2249 to 4110)       | 45 (32 to 61)                                  | 58 (42 to 76) | 27.1% (17.3% to 41.7%)                                  |
| Togo                       | 1138 (798 to 1566)     | 3173 (2211 to 4304)       | 54 (38 to 74)                                  | 57 (40 to 77) | 4.4% (-0.3% to 9.1%)                                    |

| Location                          | YLD                     |                           |                                                |                 |                                                         |
|-----------------------------------|-------------------------|---------------------------|------------------------------------------------|-----------------|---------------------------------------------------------|
|                                   | Numbers<br>(95% UI)     |                           | Age-standardized rates per 100,000<br>(95% UI) |                 | Percentage change of age-standardized rates<br>(95% UI) |
|                                   | (Year 1990)             | (Year 2019)               | (Year 1990)                                    | (Year 2019)     | (Year 1990–Year 2019)                                   |
| <b>Eastern Sub-Saharan Africa</b> | 78366 (56234 to 106623) | 158772 (115632 to 212654) | 64 (46 to 86)                                  | 61 (44 to 81)   | -4.6% (-8.9% to -1.8%)                                  |
| Burundi                           | 2385 (1658 to 3269)     | 8672 (6103 to 12139)      | 67 (47 to 92)                                  | 111 (79 to 154) | 64.9% (29% to 133.1%)                                   |
| Comoros                           | 205 (145 to 279)        | 430 (301 to 588)          | 68 (48 to 93)                                  | 71 (50 to 97)   | 4.8% (0.1% to 9.6%)                                     |
| Djibouti                          | 166 (114 to 227)        | 546 (386 to 741)          | 59 (41 to 79)                                  | 59 (42 to 80)   | 0.9% (-4% to 6.5%)                                      |
| Eritrea                           | 2364 (1357 to 4220)     | 3231 (2346 to 4468)       | 104 (65 to 169)                                | 73 (54 to 102)  | -29.2% (-44.5% to -10.6%)                               |
| Ethiopia                          | 29635 (20754 to 41581)  | 46122 (32994 to 62059)    | 85 (61 to 117)                                 | 70 (51 to 93)   | -18.3% (-26.5% to -12%)                                 |
| Kenya                             | 8064 (5612 to 10876)    | 22105 (15512 to 29939)    | 61 (43 to 82)                                  | 64 (45 to 86)   | 4.7% (3.4% to 6.2%)                                     |
| Madagascar                        | 4160 (2888 to 5693)     | 9033 (6300 to 12243)      | 55 (38 to 74)                                  | 51 (36 to 69)   | -7.2% (-12.3% to -2.2%)                                 |
| Malawi                            | 2499 (1722 to 3363)     | 4867 (3373 to 6630)       | 41 (29 to 56)                                  | 41 (29 to 56)   | -0.3% (-5.5% to 5.4%)                                   |
| Mozambique                        | 6159 (4462 to 8610)     | 11785 (8413 to 15762)     | 69 (50 to 96)                                  | 69 (50 to 92)   | -0.2% (-15.2% to 10.8%)                                 |
| Rwanda                            | 3202 (2193 to 4400)     | 6728 (4867 to 9024)       | 71 (49 to 96)                                  | 75 (55 to 100)  | 6.4% (-8.7% to 37.8%)                                   |
| Somalia                           | 2245 (1540 to 3269)     | 6429 (4643 to 8636)       | 50 (34 to 69)                                  | 52 (38 to 70)   | 5.7% (-6.7% to 16%)                                     |
| South Sudan                       | 2292 (1640 to 3060)     | 3706 (2671 to 4957)       | 63 (45 to 83)                                  | 63 (45 to 83)   | 0% (-6.6% to 8%)                                        |
| Uganda                            | 5627 (4051 to 7768)     | 12677 (9152 to 16970)     | 52 (38 to 71)                                  | 54 (39 to 72)   | 2.7% (-10.1% to 12.9%)                                  |
| United Republic of Tanzania       | 7487 (5161 to 10080)    | 17639 (12368 to 24008)    | 47 (32 to 64)                                  | 48 (34 to 65)   | 2.8% (-2.6% to 8.2%)                                    |
| Zambia                            | 1817 (1268 to 2473)     | 4675 (3269 to 6385)       | 39 (27 to 53)                                  | 41 (29 to 56)   | 4.4% (-1.2% to 10.4%)                                   |
| <b>Central Sub-Saharan Africa</b> | 19427 (14018 to 26234)  | 49757 (36254 to 66187)    | 53 (38 to 71)                                  | 57 (42 to 77)   | 7.8% (3.3% to 13.1%)                                    |

1  
2  
3  
4  
5  
6  
7  
8  
9  
10  
11  
12  
13  
14  
15  
16  
17  
18  
19  
20  
21  
22  
23  
24  
25  
26  
27  
28  
29  
30  
31  
32  
33  
34  
35  
36  
37  
38  
39  
40  
41  
42  
43  
44  
45  
46

| Location                         | YLD                   |                        |                                                |               |                                                         |
|----------------------------------|-----------------------|------------------------|------------------------------------------------|---------------|---------------------------------------------------------|
|                                  | Numbers<br>(95% UI)   |                        | Age-standardized rates per 100,000<br>(95% UI) |               | Percentage change of age-standardized rates<br>(95% UI) |
|                                  | (Year 1990)           | (Year 2019)            | (Year 1990)                                    | (Year 2019)   | (Year 1990–Year 2019)                                   |
| Angola                           | 5060 (3578 to 6975)   | 12323 (9051 to 16261)  | 69 (50 to 93)                                  | 66 (49 to 87) | -3.9% (-11.9% to 4.3%)                                  |
| Central African Republic         | 759 (532 to 1029)     | 2060 (1512 to 2777)    | 41 (29 to 56)                                  | 54 (40 to 71) | 29.1% (15.9% to 50.3%)                                  |
| Congo                            | 783 (546 to 1064)     | 2309 (1677 to 3084)    | 49 (34 to 67)                                  | 57 (42 to 76) | 17% (5.6% to 34.8%)                                     |
| Democratic Republic of the Congo | 12283 (8662 to 16696) | 31757 (22970 to 42327) | 50 (35 to 67)                                  | 55 (39 to 72) | 9.6% (2.6% to 19.6%)                                    |
| Equatorial Guinea                | 126 (88 to 169)       | 474 (334 to 646)       | 44 (31 to 59)                                  | 52 (37 to 71) | 18.4% (12.1% to 24.5%)                                  |
| Gabon                            | 418 (293 to 569)      | 834 (582 to 1128)      | 59 (41 to 79)                                  | 59 (41 to 80) | 0.8% (-3.8% to 6.1%)                                    |

Abbreviations: YLDs, years lived with disability; UI, uncertainty interval

Table 11. Incidence of spinal cord injury in 1990 and 2019, and percentage changes of age-standardized rates by location, 1990–2019

|                                  | Incidence                 |                            |                                                |               |                                                         |
|----------------------------------|---------------------------|----------------------------|------------------------------------------------|---------------|---------------------------------------------------------|
|                                  | Numbers<br>(95% UI)       |                            | Age-standardized rates per 100,000<br>(95% UI) |               | Percentage change of age-standardized rates<br>(95% UI) |
|                                  | (Year 1990)               | (Year 2019)                | (Year 1990)                                    | (Year 2019)   | (Year 1990–Year 2019)                                   |
|                                  |                           |                            |                                                |               |                                                         |
| <b>Global</b>                    | 595228 (471497 to 766656) | 909001 (706953 to 1156410) | 12 (10 to 16)                                  | 12 (9 to 15)  | -6.1% (-17.3% to 1.5%)                                  |
| <b>High-income</b>               | 144467 (114653 to 181721) | 218207 (166751 to 289330)  | 14 (11 to 18)                                  | 14 (11 to 18) | -0.8% (-4.3% to 2.4%)                                   |
| <b>High-income North America</b> | 67501 (52610 to 87116)    | 114001 (85370 to 155645)   | 22 (17 to 28)                                  | 23 (17 to 30) | 4.6% (-0.9% to 10.5%)                                   |
| Canada                           | 2827 (2314 to 3453)       | 5431 (4270 to 6912)        | 10 (8 to 12)                                   | 10 (8 to 13)  | 6.2% (0.6% to 11.9%)                                    |
| Greenland                        | 17 (13 to 22)             | 19 (15 to 26)              | 39 (29 to 50)                                  | 32 (24 to 43) | -17.0% (-20.6% to -13.7%)                               |
| United States of America         | 64655 (50213 to 83656)    | 108549 (80631 to 149208)   | 23 (18 to 29)                                  | 24 (18 to 32) | 5.1% (-0.7% to 11.4%)                                   |
| <b>Australasia</b>               | 2714 (2200 to 3280)       | 4996 (3949 to 6243)        | 13 (11 to 16)                                  | 14 (11 to 17) | 8.1% (3.3% to 13.2%)                                    |
| Australia                        | 2175 (1760 to 2635)       | 4146 (3277 to 5191)        | 13 (10 to 15)                                  | 14 (11 to 17) | 9.5% (4.1% to 15.2%)                                    |
| New Zealand                      | 539 (439 to 658)          | 850 (675 to 1072)          | 15 (12 to 19)                                  | 16 (13 to 19) | 3.8% (-0.7% to 8.5%)                                    |
| <b>High-income Asia Pacific</b>  | 24139 (19331 to 29846)    | 32690 (25123 to 43125)     | 13 (11 to 16)                                  | 12 (9 to 15)  | -9.8% (-13.9% to -6.4%)                                 |
| Brunei Darussalam                | 19 (16 to 23)             | 32 (26 to 38)              | 9 (7 to 10)                                    | 8 (6 to 9)    | -8.5% (-13.8% to -3.9%)                                 |
| Japan                            | 19707 (15505 to 24733)    | 26116 (19727 to 35484)     | 14 (11 to 18)                                  | 13 (10 to 17) | -7.7% (-11.8% to -4.3%)                                 |
| Republic of Korea                | 4182 (3485 to 4986)       | 6124 (4942 to 7543)        | 10 (8 to 12)                                   | 9 (8 to 12)   | -3.4% (-10.6% to 3.3%)                                  |
| Singapore                        | 230 (191 to 276)          | 418 (340 to 504)           | 7 (6 to 9)                                     | 7 (6 to 8)    | -7.0% (-10.6% to -3.5%)                                 |
| <b>Western Europe</b>            | 46448 (36453 to 59098)    | 61215 (45912 to 80682)     | 10 (8 to 13)                                   | 10 (8 to 12)  | -5.6% (-9.8% to -2.2%)                                  |
| Andorra                          | 5 (4 to 7)                | 12 (9 to 15)               | 10 (8 to 13)                                   | 11 (8 to 14)  | 2.9% (-0.8% to 7.0%)                                    |

1  
2  
3  
4  
5  
6  
7  
8  
9  
10  
11  
12  
13  
14  
15  
16  
17  
18  
19  
20  
21  
22  
23  
24  
25  
26  
27  
28  
29  
30  
31  
32  
33  
34  
35  
36  
37  
38  
39  
40  
41  
42  
43  
44  
45  
46

|             | Incidence            |                       |                                                |               |                                                         |
|-------------|----------------------|-----------------------|------------------------------------------------|---------------|---------------------------------------------------------|
|             | Numbers<br>(95% UI)  |                       | Age-standardized rates per 100,000<br>(95% UI) |               | Percentage change of age-standardized rates<br>(95% UI) |
|             | (Year 1990)          | (Year 2019)           | (Year 1990)                                    | (Year 2019)   | (Year 1990–Year 2019)                                   |
| Austria     | 1011 (796 to 1274)   | 1209 (922 to 1575)    | 11 (9 to 14)                                   | 10 (8 to 12)  | -11.0% (-15.4% to -6.6%)                                |
| Belgium     | 1221 (966 to 1531)   | 1992 (1500 to 2628)   | 11 (9 to 13)                                   | 12 (9 to 15)  | 13.8% (6.7% to 19.7%)                                   |
| Cyprus      | 67 (54 to 81)        | 135 (105 to 173)      | 9 (7 to 11)                                    | 9 (7 to 12)   | 5.4% (-0.8% to 11.1%)                                   |
| Denmark     | 752 (577 to 978)     | 657 (505 to 851)      | 11 (9 to 14)                                   | 9 (7 to 11)   | -23.5% (-27.8% to -18.8%)                               |
| Finland     | 800 (635 to 1014)    | 995 (754 to 1300)     | 14 (11 to 18)                                  | 13 (10 to 16) | -9.0% (-13.3% to -4.7%)                                 |
| France      | 7961 (6227 to 10235) | 10840 (8157 to 14346) | 12 (9 to 15)                                   | 11 (9 to 14)  | -6.5% (-11.3% to -2.2%)                                 |
| Germany     | 8658 (6811 to 10987) | 11418 (8599 to 15121) | 9 (7 to 11)                                    | 9 (7 to 11)   | -1.3% (-6.3% to 3.3%)                                   |
| Greece      | 912 (738 to 1121)    | 897 (711 to 1125)     | 8 (7 to 10)                                    | 7 (6 to 9)    | -11.0% (-14.9% to -7.3%)                                |
| Iceland     | 23 (19 to 29)        | 35 (28 to 45)         | 9 (7 to 11)                                    | 9 (7 to 11)   | -2.0% (-6.7% to 2.2%)                                   |
| Ireland     | 307 (247 to 379)     | 454 (357 to 575)      | 8 (7 to 10)                                    | 8 (7 to 10)   | -0.8% (-6.2% to 3.9%)                                   |
| Israel      | 396 (315 to 513)     | 700 (560 to 870)      | 8 (6 to 10)                                    | 7 (6 to 9)    | -10.8% (-28.3% to -0.1%)                                |
| Italy       | 6984 (5309 to 9235)  | 7114 (5225 to 9725)   | 10 (8 to 13)                                   | 8 (6 to 10)   | -23.6% (-26.2% to -20.9%)                               |
| Luxembourg  | 46 (37 to 58)        | 77 (59 to 100)        | 11 (9 to 13)                                   | 10 (8 to 13)  | -7.6% (-13.0% to -2.5%)                                 |
| Malta       | 32 (26 to 40)        | 51 (39 to 66)         | 9 (7 to 11)                                    | 9 (7 to 12)   | 6.3% (2.9% to 9.7%)                                     |
| Monaco      | 8 (6 to 11)          | 11 (8 to 16)          | 18 (13 to 24)                                  | 20 (15 to 27) | 12.2% (7.6% to 16.2%)                                   |
| Netherlands | 1306 (1026 to 1627)  | 2465 (1825 to 3305)   | 8 (6 to 10)                                    | 9 (7 to 12)   | 21.1% (12.7% to 29.4%)                                  |
| Norway      | 1525 (1067 to 2203)  | 2129 (1430 to 3202)   | 26 (19 to 37)                                  | 26 (18 to 37) | -1.3% (-5.5% to 2.7%)                                   |
| Portugal    | 844 (690 to 1026)    | 912 (716 to 1160)     | 8 (6 to 9)                                     | 6 (5 to 7)    | -21.9% (-28.0% to -16.8%)                               |
| San Marino  | 5 (4 to 6)           | 9 (6 to 12)           | 18 (14 to 24)                                  | 20 (15 to 27) | 9.3% (3.5% to 14.4%)                                    |
| Spain       | 3241 (2655 to 3941)  | 4547 (3526 to 5853)   | 8 (6 to 9)                                     | 8 (6 to 10)   | -0.9% (-10.0% to 7.6%)                                  |
| Sweden      | 2789 (1953 to 4022)  | 3946 (2665 to 5921)   | 24 (17 to 32)                                  | 24 (17 to 34) | 1.8% (-3.0% to 6.6%)                                    |
| Switzerland | 1194 (929 to 1527)   | 1460 (1091 to 1923)   | 14 (11 to 18)                                  | 12 (9 to 15)  | -18.5% (-21.9% to -14.8%)                               |



1  
2  
3  
4  
5  
6  
7  
8  
9  
10  
11  
12  
13  
14  
15  
16  
17  
18  
19  
20  
21  
22  
23  
24  
25  
26  
27  
28  
29  
30  
31  
32  
33  
34  
35  
36  
37  
38  
39  
40  
41  
42  
43  
44  
45  
46

|                                                         | Incidence              |                        |                                                |               |                                                         |
|---------------------------------------------------------|------------------------|------------------------|------------------------------------------------|---------------|---------------------------------------------------------|
|                                                         | Numbers<br>(95% UI)    |                        | Age-standardized rates per 100,000<br>(95% UI) |               | Percentage change of age-standardized rates<br>(95% UI) |
|                                                         | (Year 1990)            | (Year 2019)            | (Year 1990)                                    | (Year 2019)   | (Year 1990–Year 2019)                                   |
| United Kingdom                                          | 6323 (4968 to 8043)    | 9096 (6830 to 12284)   | 10 (8 to 12)                                   | 10 (8 to 13)  | 6.0% (0.4% to 10.6%)                                    |
| <b>Southern Latin America</b>                           | 3665 (3016 to 4385)    | 5305 (4326 to 6394)    | 8 (6 to 9)                                     | 8 (6 to 9)    | 1.7% (-2.6% to 5.2%)                                    |
| Argentina                                               | 2425 (2006 to 2895)    | 3384 (2755 to 4077)    | 7 (6 to 9)                                     | 7 (6 to 9)    | -1.7% (-7.2% to 2.8%)                                   |
| Chile                                                   | 965 (798 to 1153)      | 1599 (1294 to 1955)    | 8 (6 to 9)                                     | 8 (7 to 10)   | 9.3% (4.8% to 13.5%)                                    |
| Uruguay                                                 | 275 (221 to 340)       | 322 (260 to 391)       | 9 (7 to 11)                                    | 9 (7 to 10)   | 0.1% (-6.8% to 6.4%)                                    |
| <b>Central Europe, Eastern Europe, and Central Asia</b> | 60749 (48760 to 75114) | 53570 (42822 to 66828) | 14 (11 to 18)                                  | 12 (10 to 15) | -16.9% (-19.6% to -14.4%)                               |
| <b>Eastern Europe</b>                                   | 36775 (29156 to 46344) | 30092 (23743 to 37989) | 16 (12 to 20)                                  | 13 (11 to 16) | -15.7% (-18.3% to -12.9%)                               |
| Belarus                                                 | 1441 (1168 to 1785)    | 1362 (1099 to 1674)    | 13 (11 to 16)                                  | 13 (10 to 16) | -3.7% (-10.5% to 3.3%)                                  |
| Estonia                                                 | 274 (223 to 339)       | 160 (128 to 195)       | 17 (14 to 21)                                  | 11 (9 to 13)  | -34.4% (-39.2% to -30.1%)                               |
| Latvia                                                  | 527 (423 to 652)       | 259 (209 to 320)       | 18 (15 to 23)                                  | 12 (10 to 14) | -36.6% (-40.2% to -32.9%)                               |
| Lithuania                                               | 659 (531 to 815)       | 448 (358 to 555)       | 17 (14 to 21)                                  | 13 (11 to 16) | -22.0% (-27.2% to -17.0%)                               |
| Republic of Moldova                                     | 562 (454 to 702)       | 381 (309 to 462)       | 13 (10 to 16)                                  | 10 (8 to 12)  | -23.9% (-28.2% to -19.5%)                               |
| Russian Federation                                      | 24982 (19584 to 31842) | 21366 (16720 to 27153) | 16 (13 to 20)                                  | 13 (11 to 17) | -16.2% (-19.6% to -12.6%)                               |
| Ukraine                                                 | 8330 (6687 to 10418)   | 6116 (4927 to 7659)    | 15 (12 to 19)                                  | 13 (11 to 16) | -13.3% (-16.4% to -9.3%)                                |
| <b>Central Europe</b>                                   | 19087 (15495 to 23162) | 17227 (13648 to 21504) | 15 (12 to 18)                                  | 13 (11 to 16) | -13.0% (-16.2% to -9.8%)                                |
| Albania                                                 | 357 (280 to 449)       | 307 (246 to 378)       | 11 (9 to 14)                                   | 11 (9 to 14)  | 0.5% (-7.6% to 9.0%)                                    |
| Bosnia and Herzegovina                                  | 685 (488 to 1106)      | 395 (315 to 483)       | 15 (11 to 24)                                  | 11 (9 to 14)  | -24.7% (-52.9% to -2.0%)                                |
| Bulgaria                                                | 1161 (950 to 1404)     | 858 (692 to 1043)      | 13 (11 to 16)                                  | 12 (10 to 14) | -9% (-13.4% to -5.1%)                                   |
| Croatia                                                 | 832 (670 to 1027)      | 952 (726 to 1242)      | 16 (13 to 20)                                  | 16 (13 to 20) | 0.3% (-7.2% to 8.0%)                                    |

1  
2  
3  
4  
5  
6  
7  
8  
9  
10  
11  
12  
13  
14  
15  
16  
17  
18  
19  
20  
21  
22  
23  
24  
25  
26  
27  
28  
29  
30  
31  
32  
33  
34  
35  
36  
37  
38  
39  
40  
41  
42  
43  
44  
45  
46

|                                    | Incidence              |                        |                                                |               |                                                         |
|------------------------------------|------------------------|------------------------|------------------------------------------------|---------------|---------------------------------------------------------|
|                                    | Numbers<br>(95% UI)    |                        | Age-standardized rates per 100,000<br>(95% UI) |               | Percentage change of age-standardized rates<br>(95% UI) |
|                                    | (Year 1990)            | (Year 2019)            | (Year 1990)                                    | (Year 2019)   | (Year 1990–Year 2019)                                   |
| Czechia                            | 2133 (1690 to 2694)    | 1845 (1461 to 2299)    | 19 (15 to 23)                                  | 14 (12 to 18) | -22.2% (-26.2% to -18.3%)                               |
| Hungary                            | 2243 (1764 to 2836)    | 1657 (1300 to 2100)    | 19 (15 to 24)                                  | 14 (11 to 17) | -28.0% (-31.8% to -24.1%)                               |
| Montenegro                         | 80 (65 to 97)          | 86 (69 to 105)         | 13 (10 to 15)                                  | 13 (10 to 15) | 0.6% (-2.2% to 3.3%)                                    |
| North Macedonia                    | 197 (160 to 240)       | 247 (197 to 301)       | 10 (8 to 12)                                   | 11 (9 to 13)  | 13.6% (6.3% to 21.3%)                                   |
| Poland                             | 5733 (4558 to 7097)    | 5981 (4676 to 7524)    | 15 (12 to 18)                                  | 13 (11 to 17) | -8.3% (-12.4% to -4.2%)                                 |
| Romania                            | 3310 (2715 to 3957)    | 2425 (1962 to 2953)    | 14 (11 to 16)                                  | 12 (9 to 14)  | -15.6% (-19.5% to -11.5%)                               |
| Serbia                             | 1074 (868 to 1324)     | 1082 (873 to 1327)     | 11 (9 to 14)                                   | 11 (9 to 14)  | 0.7% (-6.3% to 7.6%)                                    |
| Slovakia                           | 870 (701 to 1066)      | 928 (735 to 1145)      | 16 (13 to 19)                                  | 15 (12 to 18) | -7.5% (-11.9% to -3.5%)                                 |
| Slovenia                           | 411 (329 to 510)       | 466 (364 to 597)       | 19 (15 to 24)                                  | 17 (13 to 20) | -14.2% (-20.0% to -9.1%)                                |
| <b>Central Asia</b>                | 4887 (4059 to 5797)    | 6252 (5146 to 7468)    | 7 (6 to 9)                                     | 7 (6 to 8)    | -6.8% (-9.5% to -4.3%)                                  |
| Armenia                            | 294 (243 to 352)       | 192 (159 to 231)       | 9 (7 to 10)                                    | 6 (5 to 7)    | -28.8% (-34.4% to -24.1%)                               |
| Azerbaijan                         | 472 (391 to 570)       | 590 (485 to 708)       | 6 (5 to 8)                                     | 6 (5 to 7)    | -10.8% (-17.5% to -5.3%)                                |
| Georgia                            | 455 (375 to 545)       | 343 (280 to 418)       | 8 (7 to 10)                                    | 9 (7 to 11)   | 9.9% (4.9% to 15.0%)                                    |
| Kazakhstan                         | 1384 (1137 to 1671)    | 1558 (1281 to 1873)    | 8 (7 to 10)                                    | 8 (7 to 10)   | -0.3% (-4.1% to 3.5%)                                   |
| Kyrgyzstan                         | 327 (271 to 389)       | 391 (322 to 474)       | 8 (6 to 9)                                     | 6 (5 to 7)    | -20.7% (-24.8% to -16.4%)                               |
| Mongolia                           | 147 (122 to 175)       | 275 (226 to 330)       | 7 (6 to 9)                                     | 8 (7 to 10)   | 10.8% (3.7% to 16.7%)                                   |
| Tajikistan                         | 351 (292 to 416)       | 498 (414 to 595)       | 7 (6 to 8)                                     | 5 (4 to 6)    | -23.1% (-27.8% to -19.1%)                               |
| Turkmenistan                       | 208 (173 to 249)       | 285 (237 to 341)       | 6 (5 to 7)                                     | 6 (5 to 7)    | -2.4% (-8.0% to 3.2%)                                   |
| Uzbekistan                         | 1249 (1049 to 1482)    | 2119 (1744 to 2552)    | 6 (5 to 7)                                     | 6 (5 to 8)    | 3.0% (-1.0% to 7.0%)                                    |
| <b>Latin America and Caribbean</b> | 45415 (36265 to 57008) | 64555 (50629 to 82893) | 13 (10 to 16)                                  | 11 (9 to 14)  | -15.4% (-24.7% to -10.6%)                               |
| <b>Central Latin America</b>       | 19015 (14979 to 24183) | 24749 (19700 to 30982) | 13 (10 to 17)                                  | 10 (8 to 13)  | -23.4% (-34.3% to -17.9%)                               |
| Colombia                           | 3049 (2237 to 4529)    | 2768 (2213 to 3431)    | 10 (7 to 14)                                   | 6 (5 to 7)    | -40.6% (-58.5% to -27.4%)                               |

1  
2  
3  
4  
5  
6  
7  
8  
9  
10  
11  
12  
13  
14  
15  
16  
17  
18  
19  
20  
21  
22  
23  
24  
25  
26  
27  
28  
29  
30  
31  
32  
33  
34  
35  
36  
37  
38  
39  
40  
41  
42  
43  
44  
45  
46

|                                    | Incidence             |                        |                                                |               |                                                         |
|------------------------------------|-----------------------|------------------------|------------------------------------------------|---------------|---------------------------------------------------------|
|                                    | Numbers<br>(95% UI)   |                        | Age-standardized rates per 100,000<br>(95% UI) |               | Percentage change of age-standardized rates<br>(95% UI) |
|                                    | (Year 1990)           | (Year 2019)            | (Year 1990)                                    | (Year 2019)   | (Year 1990–Year 2019)                                   |
| Costa Rica                         | 172 (140 to 211)      | 303 (246 to 371)       | 6 (5 to 8)                                     | 6 (5 to 8)    | -0.6% (-4.1% to 3.8%)                                   |
| El Salvador                        | 943 (445 to 2252)     | 413 (332 to 515)       | 17 (9 to 40)                                   | 7 (5 to 8)    | -61.9% (-83.5% to -24.9%)                               |
| Guatemala                          | 871 (500 to 1724)     | 1011 (825 to 1215)     | 11 (7 to 21)                                   | 6 (5 to 7)    | -44.3% (-72.1% to -10.8%)                               |
| Honduras                           | 229 (186 to 276)      | 511 (407 to 632)       | 5 (4 to 6)                                     | 5 (4 to 7)    | 7.2% (1.0% to 14.3%)                                    |
| Mexico                             | 12232 (9539 to 15778) | 17497 (13364 to 22764) | 17 (13 to 22)                                  | 14 (11 to 19) | -16.1% (-17.6% to -14.6%)                               |
| Nicaragua                          | 210 (162 to 286)      | 292 (240 to 353)       | 6 (4 to 7)                                     | 5 (4 to 6)    | -14.0% (-33.4% to -1.3%)                                |
| Panama                             | 125 (101 to 154)      | 218 (176 to 265)       | 6 (4 to 7)                                     | 5 (4 to 6)    | -5.9% (-10.3% to -0.9%)                                 |
| Venezuela (Bolivarian Republic of) | 1184 (951 to 1472)    | 1736 (1400 to 2127)    | 7 (5 to 8)                                     | 6 (5 to 8)    | -6.7% (-13.0% to -0.5%)                                 |
| <b>Andean Latin America</b>        | 2898 (1837 to 5488)   | 2871 (2381 to 3389)    | 8 (5 to 14)                                    | 5 (4 to 5)    | -39.5% (-66.5% to -11.2%)                               |
| Bolivia (Plurinational State of)   | 249 (208 to 292)      | 487 (405 to 572)       | 4 (4 to 5)                                     | 4 (4 to 5)    | 2.5% (-3.2% to 7.9%)                                    |
| Ecuador                            | 429 (362 to 506)      | 912 (763 to 1078)      | 5 (4 to 6)                                     | 5 (4 to 6)    | 14.7% (9.9% to 19.4%)                                   |
| Peru                               | 2220 (1205 to 4832)   | 1473 (1223 to 1748)    | 10 (6 to 21)                                   | 4 (4 to 5)    | -56.3% (-78.9% to -23.7%)                               |
| <b>Caribbean</b>                   | 2137 (1747 to 2618)   | 3459 (2814 to 4227)    | 7 (5 to 8)                                     | 7 (6 to 9)    | 8.2% (0.9% to 15.1%)                                    |
| Antigua and Barbuda                | 3 (2 to 3)            | 4 (3 to 5)             | 4 (3 to 5)                                     | 5 (4 to 6)    | 11.7% (6.5% to 17.3%)                                   |
| Bahamas                            | 11 (9 to 14)          | 19 (16 to 23)          | 5 (4 to 6)                                     | 5 (4 to 6)    | 8.1% (0.9% to 14.5%)                                    |
| Barbados                           | 11 (9 to 13)          | 14 (12 to 17)          | 4 (3 to 5)                                     | 4 (4 to 5)    | 9.5% (3.6% to 15.6%)                                    |
| Belize                             | 11 (8 to 19)          | 21 (17 to 26)          | 6 (4 to 9)                                     | 5 (4 to 7)    | -9.5% (-41.1% to 13.8%)                                 |
| Bermuda                            | 6 (5 to 8)            | 9 (7 to 12)            | 11 (8 to 14)                                   | 12 (9 to 15)  | 9.3% (-1.2% to 20.5%)                                   |
| Cuba                               | 773 (629 to 944)      | 1263 (985 to 1628)     | 7 (6 to 9)                                     | 8 (7 to 10)   | 17.7% (6.3% to 28.6%)                                   |
| Dominica                           | 3 (2 to 4)            | 3 (3 to 4)             | 4 (3 to 5)                                     | 4 (4 to 5)    | 7.9% (3.3% to 12.2%)                                    |
| Dominican Republic                 | 282 (222 to 358)      | 587 (460 to 736)       | 4 (3 to 5)                                     | 5 (4 to 7)    | 31.8% (26.4% to 37.7%)                                  |
| Grenada                            | 4 (3 to 4)            | 5 (4 to 6)             | 4 (3 to 5)                                     | 5 (4 to 6)    | 21.7% (14.2% to 28.6%)                                  |
| Guyana                             | 37 (31 to 44)         | 46 (39 to 55)          | 6 (5 to 7)                                     | 6 (5 to 8)    | 14.9% (11.5% to 18.4%)                                  |

1  
2  
3  
4  
5  
6  
7  
8  
9  
10  
11  
12  
13  
14  
15  
16  
17  
18  
19  
20  
21  
22  
23  
24  
25  
26  
27  
28  
29  
30  
31  
32  
33  
34  
35  
36  
37  
38  
39  
40  
41  
42  
43  
44  
45  
46

|                                               | Incidence                 |                           |                                                |               |                                                         |
|-----------------------------------------------|---------------------------|---------------------------|------------------------------------------------|---------------|---------------------------------------------------------|
|                                               | Numbers<br>(95% UI)       |                           | Age-standardized rates per 100,000<br>(95% UI) |               | Percentage change of age-standardized rates<br>(95% UI) |
|                                               | (Year 1990)               | (Year 2019)               | (Year 1990)                                    | (Year 2019)   | (Year 1990–Year 2019)                                   |
| Haiti                                         | 258 (210 to 315)          | 505 (409 to 612)          | 4 (4 to 5)                                     | 4 (4 to 5)    | -0.2% (-5.4% to 3.8%)                                   |
| Jamaica                                       | 107 (85 to 138)           | 124 (101 to 150)          | 5 (4 to 6)                                     | 4 (4 to 5)    | -5.2% (-22.3% to 5%)                                    |
| Puerto Rico                                   | 452 (349 to 580)          | 613 (459 to 804)          | 13 (10 to 16)                                  | 13 (10 to 17) | 6.0% (-3.1% to 15.8%)                                   |
| Saint Kitts and Nevis                         | 4 (3 to 6)                | 7 (5 to 9)                | 11 (9 to 14)                                   | 12 (9 to 15)  | 6.8% (0.1% to 13.2%)                                    |
| Saint Lucia                                   | 6 (5 to 8)                | 9 (7 to 11)               | 5 (4 to 6)                                     | 5 (4 to 6)    | 0.9% (-13.6% to 10.4%)                                  |
| Saint Vincent and the Grenadines              | 4 (4 to 5)                | 6 (5 to 7)                | 4 (3 to 5)                                     | 5 (4 to 6)    | 13.7% (8.2% to 19.2%)                                   |
| Suriname                                      | 16 (13 to 21)             | 28 (23 to 35)             | 4 (4 to 5)                                     | 5 (4 to 6)    | 13.3% (7.7% to 18.5%)                                   |
| Trinidad and Tobago                           | 65 (48 to 99)             | 64 (53 to 79)             | 6 (4 to 9)                                     | 5 (4 to 6)    | -19.9% (-45% to -1.2%)                                  |
| United States Virgin Islands                  | 11 (8 to 14)              | 13 (10 to 17)             | 11 (8 to 14)                                   | 11 (9 to 14)  | 4.3% (-3.6% to 12.3%)                                   |
| <b>Tropical Latin America</b>                 | 21365 (16580 to 27710)    | 33477 (25278 to 44097)    | 16 (12 to 20)                                  | 14 (11 to 19) | -8.1% (-11.5% to -5.1%)                                 |
| Brazil                                        | 21177 (16415 to 27463)    | 33118 (24962 to 43693)    | 16 (12 to 21)                                  | 15 (11 to 19) | -8.1% (-11.5% to -5.0%)                                 |
| Paraguay                                      | 188 (155 to 226)          | 359 (293 to 439)          | 5 (4 to 6)                                     | 5 (4 to 6)    | 6.0% (2.4% to 9.7%)                                     |
| <b>Southeast Asia, East Asia, and Oceania</b> | 141335 (111053 to 179070) | 284283 (211337 to 376241) | 9 (7 to 12)                                    | 12 (9 to 16)  | 25.6% (17.1% to 32.6%)                                  |
| <b>East Asia</b>                              | 104274 (79266 to 134082)  | 236241 (173443 to 315144) | 10 (7 to 13)                                   | 13 (10 to 18) | 39.8% (32.0% to 48.0%)                                  |
| China                                         | 102622 (77801 to 132131)  | 234191 (171837 to 312871) | 10 (7 to 13)                                   | 14 (10 to 19) | 40.8% (32.9% to 49.1%)                                  |
| Democratic People's Republic of Korea         | 662 (539 to 821)          | 873 (686 to 1129)         | 3 (3 to 4)                                     | 3 (2 to 4)    | -9.4% (-16.1% to -1.5%)                                 |
| Taiwan (Province of China)                    | 990 (800 to 1238)         | 1177 (934 to 1463)        | 5 (4 to 6)                                     | 4 (3 to 5)    | -23.6% (-27.2% to -19.7%)                               |
| <b>Southeast Asia</b>                         | 36808 (28373 to 48545)    | 47473 (37736 to 59770)    | 9 (7 to 12)                                    | 7 (6 to 9)    | -18.7% (-31.8% to -10.7%)                               |

1  
2  
3  
4  
5  
6  
7  
8  
9  
10  
11  
12  
13  
14  
15  
16  
17  
18  
19  
20  
21  
22  
23  
24  
25  
26  
27  
28  
29  
30  
31  
32  
33  
34  
35  
36  
37  
38  
39  
40  
41  
42  
43  
44  
45  
46

|                                  | Incidence              |                        |                                                |              |                                                         |
|----------------------------------|------------------------|------------------------|------------------------------------------------|--------------|---------------------------------------------------------|
|                                  | Numbers<br>(95% UI)    |                        | Age-standardized rates per 100,000<br>(95% UI) |              | Percentage change of age-standardized rates<br>(95% UI) |
|                                  | (Year 1990)            | (Year 2019)            | (Year 1990)                                    | (Year 2019)  | (Year 1990–Year 2019)                                   |
| Cambodia                         | 574 (386 to 1005)      | 797 (647 to 973)       | 6 (4 to 10)                                    | 5 (4 to 7)   | -12.1% (-45.5% to 16.5%)                                |
| Indonesia                        | 18250 (14109 to 23763) | 25244 (19349 to 32889) | 12 (9 to 16)                                   | 11 (8 to 14) | -11.5% (-13.7% to -9.4%)                                |
| Lao People's Democratic Republic | 305 (168 to 640)       | 279 (221 to 352)       | 8 (4 to 15)                                    | 4 (3 to 5)   | -44.8% (-72.5% to -14.3%)                               |
| Malaysia                         | 742 (575 to 955)       | 1647 (1281 to 2113)    | 5 (4 to 6)                                     | 5 (4 to 7)   | 11.3% (6.6% to 16.4%)                                   |
| Maldives                         | 7 (6 to 8)             | 19 (16 to 23)          | 4 (3 to 5)                                     | 4 (3 to 5)   | 9.2% (0.5% to 17.6%)                                    |
| Mauritius                        | 86 (66 to 113)         | 140 (107 to 183)       | 8 (6 to 11)                                    | 10 (8 to 13) | 22.6% (13.8% to 32.3%)                                  |
| Myanmar                          | 2114 (1669 to 2836)    | 2798 (2239 to 3572)    | 6 (5 to 7)                                     | 5 (4 to 7)   | -3.9% (-10.6% to 3.2%)                                  |
| Philippines                      | 4386 (3208 to 6290)    | 4962 (3991 to 6137)    | 8 (6 to 11)                                    | 5 (4 to 6)   | -38.3% (-54.2% to -22.5%)                               |
| Seychelles                       | 6 (5 to 8)             | 11 (8 to 14)           | 9 (7 to 12)                                    | 10 (8 to 13) | 9.7% (5.2% to 14.2%)                                    |
| Sri Lanka                        | 4222 (1659 to 10682)   | 1496 (1195 to 1878)    | 24 (10 to 59)                                  | 7 (5 to 8)   | -72.1% (-86.6% to -38.7%)                               |
| Thailand                         | 3095 (2432 to 3953)    | 4088 (3294 to 5010)    | 6 (5 to 7)                                     | 5 (4 to 6)   | -10.5% (-17.0% to -3.9%)                                |
| Timor-Leste                      | 142 (50 to 380)        | 46 (37 to 57)          | 17 (7 to 45)                                   | 4 (3 to 5)   | -77.2% (-91.1% to -42.1%)                               |
| Viet Nam                         | 2831 (2271 to 3514)    | 5883 (4660 to 7367)    | 5 (4 to 6)                                     | 6 (5 to 8)   | 26.2% (19.4% to 33.8%)                                  |
| <b>Oceania</b>                   | 253 (203 to 313)       | 569 (466 to 697)       | 5 (4 to 6)                                     | 5 (4 to 6)   | 10.3% (-2.6% to 19.0%)                                  |
| American Samoa                   | 4 (3 to 5)             | 5 (4 to 6)             | 9 (7 to 12)                                    | 10 (8 to 13) | 6.4% (-0.1% to 13.1%)                                   |
| Cook Islands                     | 2 (2 to 3)             | 2 (2 to 3)             | 12 (9 to 17)                                   | 11 (8 to 14) | -11.7% (-27.9% to 3.0%)                                 |
| Fiji                             | 23 (19 to 29)          | 31 (26 to 38)          | 3 (3 to 4)                                     | 4 (3 to 4)   | 7.3% (2.6% to 11.7%)                                    |
| Guam                             | 11 (9 to 15)           | 16 (13 to 21)          | 9 (7 to 12)                                    | 9 (7 to 12)  | 2.4% (-4.3% to 9.1%)                                    |
| Kiribati                         | 2 (2 to 3)             | 3 (3 to 4)             | 3 (2 to 4)                                     | 3 (3 to 4)   | 2.8% (-2.0% to 7.5%)                                    |
| Marshall Islands                 | 1 (1 to 2)             | 2 (2 to 3)             | 4 (3 to 5)                                     | 4 (4 to 5)   | 6.7% (2.7% to 10.9%)                                    |
| Micronesia (Federated States of) | 4 (3 to 4)             | 4 (3 to 5)             | 4 (3 to 5)                                     | 5 (4 to 6)   | 11.7% (6.2% to 17.6%)                                   |
| Nauru                            | 1 (1 to 1)             | 1 (1 to 1)             | 9 (7 to 12)                                    | 10 (8 to 13) | 15.2% (8.4% to 22.5%)                                   |

1  
2  
3  
4  
5  
6  
7  
8  
9  
10  
11  
12  
13  
14  
15  
16  
17  
18  
19  
20  
21  
22  
23  
24  
25  
26  
27  
28  
29  
30  
31  
32  
33  
34  
35  
36  
37  
38  
39  
40  
41  
42  
43  
44  
45  
46

|                                     | Incidence              |                        |                                                |                |                                                         |
|-------------------------------------|------------------------|------------------------|------------------------------------------------|----------------|---------------------------------------------------------|
|                                     | Numbers<br>(95% UI)    |                        | Age-standardized rates per 100,000<br>(95% UI) |                | Percentage change of age-standardized rates<br>(95% UI) |
|                                     | (Year 1990)            | (Year 2019)            | (Year 1990)                                    | (Year 2019)    | (Year 1990–Year 2019)                                   |
| Niue                                | 0 (0 to 0)             | 0 (0 to 0)             | 9 (7 to 11)                                    | 10 (8 to 13)   | 19.6% (11.0% to 28.6%)                                  |
| Northern Mariana Islands            | 5 (4 to 6)             | 6 (4 to 7)             | 12 (10 to 16)                                  | 13 (10 to 18)  | 6.9% (-3.6% to 17.6%)                                   |
| Palau                               | 2 (1 to 2)             | 3 (2 to 4)             | 14 (11 to 18)                                  | 17 (13 to 22)  | 17.1% (11.9% to 21.9%)                                  |
| Papua New Guinea                    | 154 (122 to 200)       | 414 (337 to 509)       | 5 (4 to 6)                                     | 5 (4 to 6)     | 13.7% (-4.4% to 25.1%)                                  |
| Samoa                               | 8 (6 to 11)            | 9 (7 to 11)            | 6 (4 to 8)                                     | 5 (4 to 6)     | -20.1% (-39.1% to -4.3%)                                |
| Solomon Islands                     | 13 (11 to 16)          | 31 (25 to 37)          | 5 (4 to 6)                                     | 6 (5 to 7)     | 14.7% (8.6% to 20.4%)                                   |
| Tokelau                             | 0 (0 to 0)             | 0 (0 to 0)             | 7 (6 to 10)                                    | 9 (7 to 12)    | 21.6% (13.2% to 30.4%)                                  |
| Tonga                               | 3 (3 to 4)             | 3 (3 to 4)             | 4 (3 to 5)                                     | 4 (3 to 4)     | -8.6% (-18.7% to 0.1%)                                  |
| Tuvalu                              | 1 (0 to 1)             | 1 (1 to 1)             | 8 (6 to 10)                                    | 9 (7 to 12)    | 18.7% (11.1% to 26.9%)                                  |
| Vanuatu                             | 4 (4 to 6)             | 10 (8 to 12)           | 3 (3 to 4)                                     | 4 (3 to 5)     | 10.2% (6.5% to 14.3%)                                   |
| <b>North Africa and Middle East</b> | 42700 (28665 to 64843) | 52776 (34780 to 97680) | 14 (9 to 21)                                   | 9 (6 to 17)    | -32.7% (-60.7% to 8.9%)                                 |
| <b>North Africa and Middle East</b> | 42700 (28665 to 64843) | 52776 (34780 to 97680) | 14 (9 to 21)                                   | 9 (6 to 17)    | -32.7% (-60.7% to 8.9%)                                 |
| Afghanistan                         | 1241 (577 to 2984)     | 10452 (3261 to 29635)  | 11 (5 to 25)                                   | 44 (12 to 132) | 308.3% (115.4% to 502.2%)                               |
| Algeria                             | 1191 (957 to 1500)     | 1935 (1588 to 2368)    | 5 (4 to 6)                                     | 5 (4 to 6)     | -6.7% (-13.1% to -0.4%)                                 |
| Bahrain                             | 21 (17 to 27)          | 65 (53 to 78)          | 4 (4 to 5)                                     | 5 (4 to 6)     | 5.6% (-2.2% to 13.4%)                                   |
| Egypt                               | 1923 (1536 to 2429)    | 4060 (3281 to 5084)    | 4 (3 to 5)                                     | 4 (3 to 5)     | 16.3% (6.6% to 33.8%)                                   |
| Iran (Islamic Republic of)          | 24800 (13327 to 45554) | 4164 (3373 to 5116)    | 51 (26 to 95)                                  | 5 (4 to 6)     | -90.2% (-94.8% to -81.2%)                               |
| Iraq                                | 1862 (1081 to 3507)    | 3076 (2202 to 4940)    | 11 (6 to 19)                                   | 7 (5 to 11)    | -32.4% (-44.7% to -15.8%)                               |
| Jordan                              | 143 (118 to 173)       | 456 (379 to 543)       | 4 (3 to 5)                                     | 4 (3 to 5)     | -1.1% (-6.7% to 4.5%)                                   |
| Kuwait                              | 702 (234 to 1879)      | 222 (183 to 267)       | 36 (12 to 97)                                  | 5 (4 to 6)     | -86.3% (-94.9% to -60.5%)                               |
| Lebanon                             | 547 (234 to 1362)      | 244 (201 to 294)       | 16 (7 to 40)                                   | 5 (4 to 6)     | -71.5% (-87.7% to -37.5%)                               |

1  
2  
3  
4  
5  
6  
7  
8  
9  
10  
11  
12  
13  
14  
15  
16  
17  
18  
19  
20  
21  
22  
23  
24  
25  
26  
27  
28  
29  
30  
31  
32  
33  
34  
35  
36  
37  
38  
39  
40  
41  
42  
43  
44  
45  
46

|                           | Incidence               |                           |                                                |              |                                                         |
|---------------------------|-------------------------|---------------------------|------------------------------------------------|--------------|---------------------------------------------------------|
|                           | Numbers<br>(95% UI)     |                           | Age-standardized rates per 100,000<br>(95% UI) |              | Percentage change of age-standardized rates<br>(95% UI) |
|                           | (Year 1990)             | (Year 2019)               | (Year 1990)                                    | (Year 2019)  | (Year 1990–Year 2019)                                   |
| Libya                     | 186 (150 to 231)        | 815 (471 to 1647)         | 5 (4 to 6)                                     | 12 (7 to 24) | 141.6% (40.5% to 405.8%)                                |
| Morocco                   | 1146 (938 to 1394)      | 1836 (1507 to 2226)       | 5 (4 to 6)                                     | 5 (4 to 6)   | 8.0% (2.9% to 13.7%)                                    |
| Oman                      | 111 (87 to 142)         | 279 (226 to 355)          | 7 (5 to 9)                                     | 7 (5 to 9)   | -0.5% (-7.3% to 6.9%)                                   |
| Palestine                 | 357 (142 to 926)        | 254 (207 to 324)          | 16 (7 to 41)                                   | 5 (4 to 7)   | -66.9% (-83.5% to -29.6%)                               |
| Qatar                     | 32 (26 to 39)           | 204 (168 to 248)          | 7 (6 to 9)                                     | 7 (6 to 8)   | -3.2% (-10.3% to 3.5%)                                  |
| Saudi Arabia              | 1214 (999 to 1476)      | 4304 (3458 to 5275)       | 9 (7 to 11)                                    | 12 (9 to 14) | 33.3% (26.1% to 40.4%)                                  |
| Sudan                     | 3034 (1646 to 6333)     | 3305 (2618 to 4167)       | 16 (9 to 32)                                   | 9 (7 to 12)  | -43.6% (-72.1% to -7.9%)                                |
| Syrian Arab Republic      | 474 (388 to 577)        | 2762 (1061 to 7102)       | 4 (3 to 5)                                     | 26 (9 to 69) | 548.3% (131.1% to 1510.3%)                              |
| Tunisia                   | 365 (295 to 449)        | 574 (467 to 697)          | 5 (4 to 6)                                     | 5 (4 to 6)   | 6.1% (-0.9% to 13.0%)                                   |
| Turkey                    | 2725 (2128 to 3708)     | 4391 (3619 to 5398)       | 5 (4 to 6)                                     | 5 (4 to 6)   | 11.1% (-9.0% to 28.1%)                                  |
| United Arab Emirates      | 102 (82 to 127)         | 562 (454 to 695)          | 6 (5 to 7)                                     | 6 (5 to 7)   | -3.5% (-8.2% to 1.3%)                                   |
| Yemen                     | 495 (404 to 603)        | 8763 (2941 to 24072)      | 4 (3 to 5)                                     | 26 (9 to 70) | 510.5% (122.1% to 1565%)                                |
| <b>South Asia</b>         | 81527 (64240 to 103563) | 156382 (120425 to 201426) | 9 (7 to 11)                                    | 9 (7 to 12)  | 5.1% (-7.8% to 12.8%)                                   |
| <b>South Asia</b>         | 81527 (64240 to 103563) | 156382 (120425 to 201426) | 9 (7 to 11)                                    | 9 (7 to 12)  | 5.1% (-7.8% to 12.8%)                                   |
| Bangladesh                | 4734 (3645 to 6205)     | 8139 (6241 to 10775)      | 5 (4 to 6)                                     | 5 (4 to 7)   | 4.4% (-3.6% to 11.1%)                                   |
| Bhutan                    | 29 (22 to 39)           | 52 (41 to 68)             | 6 (4 to 7)                                     | 7 (6 to 9)   | 28.4% (20.1% to 38.7%)                                  |
| India                     | 71333 (56267 to 91142)  | 134888 (103757 to 173814) | 10 (8 to 13)                                   | 10 (8 to 13) | 2.1% (-11.3% to 10.4%)                                  |
| Nepal                     | 1039 (854 to 1257)      | 2007 (1633 to 2454)       | 6 (5 to 8)                                     | 7 (6 to 9)   | 11.0% (7.1% to 14.4%)                                   |
| Pakistan                  | 4392 (3396 to 5692)     | 11294 (8483 to 15235)     | 5 (4 to 6)                                     | 6 (4 to 8)   | 21.7% (14.9% to 28.3%)                                  |
| <b>Sub-Saharan Africa</b> | 79036 (42497 to 164850) | 79227 (60108 to 104346)   | 18 (10 to 34)                                  | 9 (7 to 13)  | -46.4% (-70.9% to -17%)                                 |

1  
2  
3  
4  
5  
6  
7  
8  
9  
10  
11  
12  
13  
14  
15  
16  
17  
18  
19  
20  
21  
22  
23  
24  
25  
26  
27  
28  
29  
30  
31  
32  
33  
34  
35  
36  
37  
38  
39  
40  
41  
42  
43  
44  
45  
46

|                                    | Incidence              |                        |                                                |               |                                                         |
|------------------------------------|------------------------|------------------------|------------------------------------------------|---------------|---------------------------------------------------------|
|                                    | Numbers<br>(95% UI)    |                        | Age-standardized rates per 100,000<br>(95% UI) |               | Percentage change of age-standardized rates<br>(95% UI) |
|                                    | (Year 1990)            | (Year 2019)            | (Year 1990)                                    | (Year 2019)   | (Year 1990–Year 2019)                                   |
| <b>Southern Sub-Saharan Africa</b> | 4607 (3525 to 6118)    | 6590 (5072 to 8666)    | 10 (8 to 14)                                   | 9 (7 to 12)   | -12.0% (-16.5% to -8.4%)                                |
| Botswana                           | 93 (73 to 120)         | 201 (155 to 267)       | 9 (7 to 11)                                    | 10 (7 to 13)  | 12.1% (6.3% to 17.3%)                                   |
| Eswatini                           | 50 (40 to 65)          | 90 (69 to 119)         | 8 (6 to 10)                                    | 9 (7 to 12)   | 13.7% (9.7% to 18.0%)                                   |
| Lesotho                            | 123 (97 to 155)        | 184 (142 to 241)       | 8 (6 to 10)                                    | 10 (7 to 13)  | 20.6% (12.5% to 29.1%)                                  |
| Namibia                            | 103 (79 to 135)        | 202 (154 to 267)       | 9 (7 to 12)                                    | 10 (7 to 13)  | 8.1% (4.7% to 11.7%)                                    |
| South Africa                       | 3579 (2694 to 4822)    | 4748 (3614 to 6370)    | 11 (8 to 15)                                   | 9 (7 to 12)   | -18.9% (-23.8% to -15.2%)                               |
| Zimbabwe                           | 659 (524 to 828)       | 1164 (911 to 1469)     | 9 (7 to 11)                                    | 10 (8 to 13)  | 12.7% (2.0% to 32.6%)                                   |
| <b>Western Sub-Saharan Africa</b>  | 16168 (11877 to 22347) | 38162 (28265 to 51944) | 11 (8 to 15)                                   | 11 (8 to 15)  | 3.4% (-5.4% to 8.0%)                                    |
| Benin                              | 367 (272 to 500)       | 1004 (729 to 1385)     | 11 (8 to 15)                                   | 11 (8 to 15)  | 5.8% (2.4% to 9.3%)                                     |
| Burkina Faso                       | 704 (520 to 961)       | 2207 (1612 to 3054)    | 10 (8 to 14)                                   | 13 (10 to 18) | 28.1% (18.4% to 49.1%)                                  |
| Cabo Verde                         | 26 (20 to 34)          | 57 (43 to 76)          | 9 (7 to 11)                                    | 11 (8 to 14)  | 24.9% (20.3% to 29.7%)                                  |
| Cameroon                           | 879 (632 to 1227)      | 2960 (2102 to 4128)    | 12 (8 to 17)                                   | 14 (10 to 19) | 15.9% (9.2% to 27.2%)                                   |
| Chad                               | 620 (398 to 1058)      | 1275 (939 to 1744)     | 13 (8 to 20)                                   | 11 (8 to 15)  | -11.7% (-39.3% to 10.5%)                                |
| Côte d'Ivoire                      | 934 (689 to 1281)      | 2179 (1598 to 2998)    | 11 (8 to 16)                                   | 12 (9 to 16)  | 2.4% (-0.8% to 5.7%)                                    |
| Gambia                             | 65 (49 to 87)          | 170 (127 to 229)       | 9 (7 to 13)                                    | 10 (8 to 14)  | 10.6% (7.3% to 13.7%)                                   |
| Ghana                              | 1226 (880 to 1713)     | 3340 (2335 to 4766)    | 11 (8 to 15)                                   | 13 (9 to 18)  | 19.6% (16.1% to 23.5%)                                  |
| Guinea                             | 475 (354 to 645)       | 1043 (750 to 1460)     | 10 (7 to 13)                                   | 11 (8 to 16)  | 14.7% (10.8% to 18.6%)                                  |
| Guinea-Bissau                      | 92 (65 to 131)         | 178 (124 to 255)       | 12 (9 to 17)                                   | 12 (9 to 17)  | 0.8% (-2.3% to 3.8%)                                    |
| Liberia                            | 1272 (356 to 3721)     | 339 (250 to 461)       | 68 (20 to 187)                                 | 9 (7 to 13)   | -86% (-95.2% to -53.4%)                                 |
| Mali                               | 832 (585 to 1265)      | 1931 (1389 to 2803)    | 12 (9 to 18)                                   | 12 (9 to 17)  | -1.2% (-11.6% to 5.6%)                                  |
| Mauritania                         | 213 (150 to 304)       | 383 (269 to 545)       | 13 (9 to 19)                                   | 12 (8 to 17)  | -8.9% (-15.6% to -3.5%)                                 |
| Niger                              | 626 (467 to 851)       | 1736 (1306 to 2329)    | 11 (8 to 15)                                   | 11 (8 to 15)  | 2.7% (-2.8% to 6.7%)                                    |
| Nigeria                            | 6673 (5070 to 8794)    | 16736 (12504 to 22446) | 10 (7 to 13)                                   | 11 (8 to 14)  | 9.2% (4.9% to 17.8%)                                    |



|                                   | Incidence               |                        |                                                |               |                                                         |
|-----------------------------------|-------------------------|------------------------|------------------------------------------------|---------------|---------------------------------------------------------|
|                                   | Numbers<br>(95% UI)     |                        | Age-standardized rates per 100,000<br>(95% UI) |               | Percentage change of age-standardized rates<br>(95% UI) |
|                                   | (Year 1990)             | (Year 2019)            | (Year 1990)                                    | (Year 2019)   | (Year 1990–Year 2019)                                   |
|                                   |                         |                        |                                                |               |                                                         |
| Sao Tome and Principe             | 10 (8 to 13)            | 21 (16 to 28)          | 11 (8 to 14)                                   | 13 (10 to 18) | 24.0% (19.8% to 28.1%)                                  |
| Senegal                           | 578 (428 to 786)        | 1219 (885 to 1673)     | 10 (8 to 14)                                   | 11 (8 to 15)  | 3.0% (-5.8% to 8.2%)                                    |
| Sierra Leone                      | 280 (207 to 382)        | 667 (479 to 929)       | 10 (7 to 13)                                   | 11 (8 to 15)  | 10.6% (7.3% to 14%)                                     |
| Togo                              | 295 (211 to 412)        | 716 (511 to 1016)      | 11 (8 to 15)                                   | 11 (8 to 16)  | 4.7% (1.4% to 7.6%)                                     |
| <b>Eastern Sub-Saharan Africa</b> | 54804 (22784 to 133741) | 29156 (22453 to 37652) | 30 (14 to 69)                                  | 9 (7 to 12)   | -69.8% (-86.8% to -36.8%)                               |
| Burundi                           | 237 (182 to 307)        | 521 (402 to 674)       | 5 (4 to 7)                                     | 5 (4 to 7)    | -0.9% (-6.9% to 10.2%)                                  |
| Comoros                           | 49 (35 to 68)           | 86 (62 to 122)         | 13 (9 to 18)                                   | 13 (10 to 19) | 2.6% (-1.2% to 6.9%)                                    |
| Djibouti                          | 61 (40 to 98)           | 119 (88 to 161)        | 15 (11 to 24)                                  | 12 (9 to 16)  | -21% (-47.9% to -2.2%)                                  |
| Eritrea                           | 3433 (819 to 10266)     | 635 (467 to 861)       | 112 (30 to 330)                                | 12 (9 to 16)  | -89.2% (-96.5% to -59.7%)                               |
| Ethiopia                          | 38357 (10931 to 107247) | 4139 (3323 to 5096)    | 72 (22 to 190)                                 | 5 (4 to 6)    | -93.3% (-97.5% to -78%)                                 |
| Kenya                             | 858 (681 to 1054)       | 1995 (1580 to 2483)    | 5 (4 to 6)                                     | 5 (4 to 6)    | 0.3% (-1.5% to 2.6%)                                    |
| Madagascar                        | 1106 (812 to 1516)      | 2400 (1784 to 3217)    | 11 (8 to 16)                                   | 11 (8 to 15)  | -2.7% (-7.0% to 2.5%)                                   |
| Malawi                            | 750 (563 to 1004)       | 1498 (1148 to 1968)    | 10 (8 to 14)                                   | 10 (8 to 14)  | 2.3% (-2.3% to 7.1%)                                    |
| Mozambique                        | 1885 (1194 to 3430)     | 3459 (2568 to 4656)    | 17 (11 to 29)                                  | 16 (12 to 22) | -7.9% (-43.1% to 18.4%)                                 |
| Rwanda                            | 1598 (867 to 3273)      | 1281 (933 to 1771)     | 25 (14 to 48)                                  | 12 (9 to 17)  | -50.6% (-74.7% to -23.1%)                               |
| Somalia                           | 1386 (691 to 3196)      | 2192 (1537 to 3307)    | 22 (12 to 47)                                  | 13 (10 to 20) | -39.4% (-61.2% to -10.6%)                               |
| South Sudan                       | 550 (404 to 749)        | 964 (698 to 1429)      | 12 (9 to 17)                                   | 13 (9 to 18)  | 6.4% (-5.1% to 34.7%)                                   |
| Uganda                            | 1664 (1208 to 2433)     | 3506 (2626 to 4657)    | 12 (9 to 17)                                   | 11 (8 to 15)  | -7.6% (-27.4% to 3.4%)                                  |
| United Republic of Tanzania       | 2217 (1681 to 2959)     | 4873 (3700 to 6437)    | 11 (8 to 15)                                   | 11 (8 to 15)  | 0.1% (-3.9% to 4.3%)                                    |
| Zambia                            | 612 (472 to 798)        | 1463 (1123 to 1917)    | 10 (8 to 14)                                   | 11 (8 to 14)  | 3.8% (-2.1% to 9.4%)                                    |
| <b>Central Sub-Saharan Africa</b> | 3457 (2080 to 6799)     | 5318 (3976 to 7773)    | 7 (4 to 12)                                    | 5 (4 to 6)    | -29.1% (-48% to -10.3%)                                 |
| Angola                            | 1919 (702 to 5157)      | 971 (759 to 1233)      | 18 (7 to 46)                                   | 4 (3 to 5)    | -77.1% (-90.9% to -43.8%)                               |

1  
2  
3  
4  
5  
6  
7  
8  
9  
10  
11  
12  
13  
14  
15  
16  
17  
18  
19  
20  
21  
22  
23  
24  
25  
26  
27  
28  
29  
30  
31  
32  
33  
34  
35  
36  
37  
38  
39  
40  
41  
42  
43  
44  
45  
46

|                                  | Incidence           |                     |                                                |             |                                                         |
|----------------------------------|---------------------|---------------------|------------------------------------------------|-------------|---------------------------------------------------------|
|                                  | Numbers<br>(95% UI) |                     | Age-standardized rates per 100,000<br>(95% UI) |             | Percentage change of age-standardized rates<br>(95% UI) |
|                                  | (Year 1990)         | (Year 2019)         | (Year 1990)                                    | (Year 2019) | (Year 1990–Year 2019)                                   |
| Central African Republic         | 83 (67 to 104)      | 365 (208 to 741)    | 4 (3 to 5)                                     | 7 (4 to 14) | 93.1% (24.9% to 269.5%)                                 |
| Congo                            | 79 (62 to 101)      | 167 (131 to 213)    | 4 (3 to 5)                                     | 4 (3 to 5)  | -6.2% (-8.9% to -3.3%)                                  |
| Democratic Republic of the Congo | 1324 (1018 to 1742) | 3704 (2691 to 5623) | 4 (3 to 5)                                     | 5 (4 to 7)  | 17.8% (3.5% to 51.4%)                                   |
| Equatorial Guinea                | 14 (11 to 17)       | 45 (35 to 57)       | 4 (3 to 5)                                     | 4 (3 to 5)  | 2.8% (-2.9% to 7.9%)                                    |
| Gabon                            | 37 (29 to 48)       | 67 (53 to 86)       | 4 (4 to 6)                                     | 4 (3 to 6)  | -1.3% (-4.5% to 2.9%)                                   |

Abbreviations: UI, uncertainty interval

1  
2  
3  
4  
5  
6  
7  
8  
9  
10  
11  
12  
13  
14  
15  
16  
17  
18  
19  
20  
21  
22  
23  
24  
25  
26  
27  
28  
29  
30  
31  
32  
33  
34  
35  
36  
37  
38  
39  
40  
41  
42  
43  
44  
45  
46

Table 12. Prevalence of spinal cord injury in 1990 and 2019, and percentage changes of age-standardized estimates by location, 1990–2019

| Location                  | Prevalence                      |                                 |                                                    |                  |                                                             |
|---------------------------|---------------------------------|---------------------------------|----------------------------------------------------|------------------|-------------------------------------------------------------|
|                           | Numbers<br>(95% UI)             |                                 | Age-standardized estimates per 100,000<br>(95% UI) |                  | Percentage change of age-standardized<br>estimates (95% UI) |
|                           | (Year 1990)                     | (Year 2019)                     | (Year 1990)                                        | (Year 2019)      | (Year 1990–Year 2019)                                       |
| Global                    | 11366799 (10375237 to 13112529) | 20635037 (18925876 to 23611174) | 239 (220 to 272)                                   | 253 (231 to 290) | 5.8% (2.7% to 9.6%)                                         |
| High-income               | 3309339 (3097968 to 3559963)    | 4658703 (4322688 to 5025979)    | 319 (298 to 343)                                   | 314 (293 to 339) | -1.6% (-3.2% to -0.1%)                                      |
| High-income North America | 1470807 (1362896 to 1596414)    | 2142480 (1965695 to 2332658)    | 468 (434 to 510)                                   | 438 (404 to 474) | -6.5% (-9.1% to -3.8%)                                      |
| Canada                    | 61362 (57616 to 66045)          | 104864 (98334 to 112454)        | 200 (188 to 215)                                   | 203 (191 to 218) | 1.5% (-1.3% to 4.2%)                                        |
| Greenland                 | 279 (257 to 306)                | 313 (288 to 341)                | 536 (495 to 584)                                   | 477 (437 to 518) | -11.1% (-13.9% to -8.8%)                                    |
| United States of America  | 1409133 (1303741 to 1532097)    | 2037268 (1865361 to 2222271)    | 497 (460 to 542)                                   | 465 (428 to 505) | -6.5% (-9.2% to -3.7%)                                      |
| Australasia               | 73943 (68140 to 82386)          | 128689 (118942 to 142726)       | 339 (312 to 378)                                   | 362 (331 to 405) | 6.8% (4.0% to 9.8%)                                         |
| Australia                 | 60172 (55261 to 67234)          | 106452 (98260 to 118061)        | 331 (304 to 370)                                   | 354 (323 to 397) | 7.0% (3.9% to 10.5%)                                        |
| New Zealand               | 13771 (12703 to 15056)          | 22238 (20608 to 24554)          | 380 (350 to 416)                                   | 407 (374 to 452) | 7.0% (3.2% to 11.4%)                                        |
| High-income Asia Pacific  | 623896 (583531 to 673069)       | 859398 (798884 to 927726)       | 317 (297 to 342)                                   | 305 (283 to 328) | -3.9% (-5.7% to -1.8%)                                      |
| Brunei Darussalam         | 396 (371 to 425)                | 809 (759 to 862)                | 184 (173 to 196)                                   | 177 (167 to 188) | -4.0% (-7.1% to -0.9%)                                      |
| Japan                     | 526634 (490533 to 569215)       | 675897 (622213 to 733296)       | 347 (324 to 375)                                   | 342 (316 to 371) | -1.4% (-3.5% to 0.9%)                                       |

1  
2

| Location          | Prevalence                  |                              |                                                    |                  |                                                             |
|-------------------|-----------------------------|------------------------------|----------------------------------------------------|------------------|-------------------------------------------------------------|
|                   | Numbers<br>(95% UI)         |                              | Age-standardized estimates per 100,000<br>(95% UI) |                  | Percentage change of age-standardized<br>estimates (95% UI) |
|                   | (Year 1990)                 | (Year 2019)                  | (Year 1990)                                        | (Year 2019)      | (Year 1990–Year 2019)                                       |
| Republic of Korea | 90930 (85259 to 96631)      | 168438 (158707 to 180809)    | 213 (200 to 225)                                   | 229 (216 to 247) | 7.9% (4.3% to 11.9%)                                        |
| Singapore         | 5936 (5540 to 6352)         | 14255 (13304 to 15272)       | 188 (176 to 201)                                   | 195 (182 to 209) | 3.6% (0.7% to 6.5%)                                         |
| Western Europe    | 1047289 (982594 to 1125303) | 1374656 (1272365 to 1486731) | 229 (215 to 246)                                   | 233 (216 to 253) | 1.4% (-1.4% to 4.3%)                                        |
| Andorra           | 138 (129 to 149)            | 284 (265 to 307)             | 231 (216 to 249)                                   | 247 (230 to 268) | 6.9% (3.1% to 11.5%)                                        |
| Austria           | 22253 (20832 to 23942)      | 28169 (26147 to 30656)       | 240 (224 to 258)                                   | 232 (215 to 255) | -3.0% (-7.6% to 1.1%)                                       |
| Belgium           | 28809 (26945 to 31200)      | 41680 (38494 to 45149)       | 241 (225 to 263)                                   | 269 (248 to 294) | 11.5% (6.8% to 16.8%)                                       |
| Cyprus            | 1599 (1492 to 1730)         | 3506 (3240 to 3836)          | 196 (183 to 212)                                   | 217 (200 to 239) | 10.5% (5.0% to 16.9%)                                       |
| Denmark           | 13546 (12628 to 14620)      | 15769 (14579 to 17119)       | 214 (199 to 232)                                   | 213 (194 to 234) | -0.7% (-5.4% to 4.5%)                                       |
| Finland           | 18048 (16781 to 19591)      | 23401 (21471 to 25629)       | 305 (283 to 333)                                   | 313 (285 to 349) | 2.6% (-1.3% to 8.2%)                                        |
| France            | 164549 (154347 to 175895)   | 222331 (205901 to 240071)    | 244 (229 to 262)                                   | 248 (229 to 268) | 1.4% (-2.5% to 5.3%)                                        |
| Germany           | 200326 (187433 to 215127)   | 252232 (231248 to 274013)    | 205 (191 to 220)                                   | 214 (196 to 234) | 4.4% (-0.2% to 9.4%)                                        |
| Greece            | 26017 (24358 to 28055)      | 27838 (25879 to 30192)       | 214 (200 to 232)                                   | 203 (188 to 222) | -5% (-9.2% to -1.5%)                                        |
| Iceland           | 563 (527 to 606)            | 924 (853 to 1003)            | 213 (199 to 229)                                   | 221 (203 to 242) | 3.9% (-0.3% to 8.4%)                                        |

39  
40  
41  
42  
43  
44  
45  
46

| Location       | Prevalence                |                           |                                                    |                  |                                                             |
|----------------|---------------------------|---------------------------|----------------------------------------------------|------------------|-------------------------------------------------------------|
|                | Numbers<br>(95% UI)       |                           | Age-standardized estimates per 100,000<br>(95% UI) |                  | Percentage change of age-standardized<br>estimates (95% UI) |
|                | (Year 1990)               | (Year 2019)               | (Year 1990)                                        | (Year 2019)      | (Year 1990–Year 2019)                                       |
|                | Ireland                   | 7297 (6822 to 7883)       | 12722 (11716 to 13820)                             | 199 (186 to 216) | 218 (200 to 239)                                            |
| Israel         | 9064 (8381 to 9847)       | 23677 (19717 to 31856)    | 191 (176 to 207)                                   | 247 (204 to 337) | 29.8% (11.9% to 69.2%)                                      |
| Italy          | 152759 (143157 to 165237) | 167203 (155913 to 180891) | 218 (204 to 235)                                   | 193 (179 to 208) | -11.8% (-14.3% to -8.9%)                                    |
| Luxembourg     | 1098 (1035 to 1181)       | 1867 (1742 to 2028)       | 240 (226 to 259)                                   | 236 (219 to 256) | -1.9% (-6.2% to 2.3%)                                       |
| Malta          | 839 (776 to 919)          | 1394 (1284 to 1511)       | 208 (192 to 228)                                   | 240 (218 to 263) | 15.3% (10.9% to 20.5%)                                      |
| Monaco         | 180 (164 to 197)          | 257 (234 to 283)          | 428 (390 to 477)                                   | 488 (440 to 553) | 14.0% (9.9% to 19.1%)                                       |
| Netherlands    | 30052 (28101 to 32175)    | 45505 (42399 to 48825)    | 175 (163 to 188)                                   | 193 (180 to 208) | 10.5% (6.1% to 14.5%)                                       |
| Norway         | 25378 (23017 to 27724)    | 36099 (32427 to 39596)    | 486 (444 to 531)                                   | 503 (454 to 557) | 3.5% (0.5% to 7.0%)                                         |
| Portugal       | 23506 (21407 to 27259)    | 23534 (21821 to 26017)    | 207 (188 to 245)                                   | 156 (144 to 172) | -24.8% (-30.4% to -20.7%)                                   |
| San Marino     | 123 (113 to 135)          | 218 (198 to 241)          | 454 (416 to 501)                                   | 505 (457 to 568) | 11.3% (7.1% to 15.8%)                                       |
| Spain          | 86830 (81809 to 92631)    | 129596 (120047 to 140357) | 197 (185 to 210)                                   | 208 (192 to 228) | 5.7% (-0.3% to 11.6%)                                       |
| Sweden         | 53249 (48329 to 58425)    | 72301 (65044 to 79382)    | 489 (447 to 539)                                   | 515 (464 to 573) | 5.3% (2.1% to 8.9%)                                         |
| Switzerland    | 25301 (23630 to 27371)    | 32541 (29900 to 35495)    | 300 (280 to 323)                                   | 272 (248 to 300) | -9.3% (-13.3% to -4.0%)                                     |
| United Kingdom | 154893 (144548 to 166794) | 210409 (194954 to 228369) | 231 (216 to 250)                                   | 243 (225 to 265) | 5.1% (2.2% to 8.0%)                                         |

1  
2  
3  
4  
5  
6  
7  
8  
9  
10  
11  
12  
13  
14  
15  
16  
17  
18  
19  
20  
21  
22  
23  
24  
25  
26  
27  
28  
29  
30  
31  
32  
33  
34  
35  
36  
37  
38  
39  
40  
41  
42  
43  
44  
45  
46

| Location                                                | Prevalence                   |                              |                                                    |                  |                                                             |
|---------------------------------------------------------|------------------------------|------------------------------|----------------------------------------------------|------------------|-------------------------------------------------------------|
|                                                         | Numbers<br>(95% UI)          |                              | Age-standardized estimates per 100,000<br>(95% UI) |                  | Percentage change of age-standardized<br>estimates (95% UI) |
|                                                         | (Year 1990)                  | (Year 2019)                  | (Year 1990)                                        | (Year 2019)      | (Year 1990–Year 2019)                                       |
| <b>Southern Latin America</b>                           | 93403 (86234 to 104555)      | 153480 (143685 to 165038)    | 194 (179 to 216)                                   | 209 (195 to 225) | 7.7% (0.5% to 12.3%)                                        |
| Argentina                                               | 63830 (57864 to 74714)       | 99369 (92357 to 107852)      | 197 (179 to 230)                                   | 205 (190 to 223) | 3.8% (-5.3% to 9.4%)                                        |
| Chile                                                   | 22612 (21262 to 24053)       | 45271 (42649 to 48478)       | 182 (172 to 193)                                   | 215 (202 to 231) | 18.2% (14.5% to 22.3%)                                      |
| Uruguay                                                 | 6957 (6534 to 7440)          | 8832 (8331 to 9435)          | 212 (198 to 227)                                   | 223 (210 to 239) | 5.5% (1.9% to 9.1%)                                         |
| <b>Central Europe, Eastern Europe, and Central Asia</b> | 1454386 (1361320 to 1563953) | 1470355 (1367128 to 1601720) | 325 (304 to 349)                                   | 291 (270 to 317) | -10.5% (-13.3% to -5.1%)                                    |
| <b>Eastern Europe</b>                                   | 899009 (838179 to 972430)    | 805575 (746346 to 876551)    | 354 (330 to 382)                                   | 305 (282 to 333) | -13.9% (-16.5% to -9.0%)                                    |
| Belarus                                                 | 35844 (33576 to 38509)       | 35199 (33016 to 38065)       | 309 (289 to 332)                                   | 290 (272 to 313) | -6.1% (-8.7% to -3.2%)                                      |
| Estonia                                                 | 6363 (5922 to 6860)          | 4627 (4341 to 4987)          | 358 (333 to 385)                                   | 273 (255 to 293) | -23.9% (-27.0% to -20.9%)                                   |
| Latvia                                                  | 11684 (10953 to 12620)       | 6847 (6438 to 7434)          | 382 (358 to 412)                                   | 273 (256 to 295) | -28.6% (-31.3% to -25.9%)                                   |
| Lithuania                                               | 14772 (13822 to 15932)       | 11184 (10535 to 12051)       | 362 (338 to 390)                                   | 297 (279 to 321) | -17.8% (-20.3% to -14.8%)                                   |
| Republic of Moldova                                     | 12807 (12015 to 13711)       | 11018 (10315 to 11881)       | 279 (262 to 299)                                   | 239 (223 to 257) | -14.5% (-17.6% to -11.2%)                                   |
| Russian Federation                                      | 608061 (566008 to 658182)    | 575291 (532592 to 628058)    | 361 (336 to 390)                                   | 313 (289 to 343) | -13.4% (-16.5% to -8.1%)                                    |
| Ukraine                                                 | 209478 (194928 to 226542)    | 161409 (149366 to 177092)    | 346 (322 to 374)                                   | 292 (269 to 321) | -15.6% (-18.7% to -10.7%)                                   |

| Location               | Prevalence                |                           |                                                    |                  |                                                             |
|------------------------|---------------------------|---------------------------|----------------------------------------------------|------------------|-------------------------------------------------------------|
|                        | Numbers<br>(95% UI)       |                           | Age-standardized estimates per 100,000<br>(95% UI) |                  | Percentage change of age-standardized<br>estimates (95% UI) |
|                        | (Year 1990)               | (Year 2019)               | (Year 1990)                                        | (Year 2019)      | (Year 1990–Year 2019)                                       |
|                        | <b>Central Europe</b>     | 439972 (412747 to 471841) | 489513 (456513 to 533815)                          | 326 (306 to 350) | 332 (308 to 363)                                            |
| Albania                | 8866 (8151 to 9594)       | 10877 (9969 to 12120)     | 306 (282 to 330)                                   | 332 (303 to 375) | 8.7% (2.5% to 20.1%)                                        |
| Bosnia and Herzegovina | 14423 (12916 to 17202)    | 20410 (14633 to 35167)    | 302 (271 to 363)                                   | 491 (349 to 860) | 62.4% (25.7% to 136.1%)                                     |
| Bulgaria               | 32719 (30682 to 35010)    | 26946 (25037 to 29240)    | 325 (304 to 348)                                   | 308 (284 to 334) | -5.3% (-8.7% to -2.7%)                                      |
| Croatia                | 19846 (18467 to 21281)    | 21217 (19643 to 23395)    | 350 (325 to 375)                                   | 369 (339 to 408) | 5.6% (0.1% to 14.4%)                                        |
| Czechia                | 42455 (39887 to 45742)    | 51155 (47808 to 55398)    | 362 (340 to 390)                                   | 366 (340 to 397) | 1.0% (-2.5% to 5.0%)                                        |
| Hungary                | 40571 (38006 to 43552)    | 40177 (37422 to 43691)    | 332 (310 to 357)                                   | 316 (293 to 343) | -5.0% (-8.6% to -0.2%)                                      |
| Montenegro             | 2028 (1896 to 2178)       | 2449 (2288 to 2656)       | 313 (292 to 336)                                   | 324 (302 to 352) | 3.5% (0.4% to 6.9%)                                         |
| North Macedonia        | 5347 (4945 to 5725)       | 7655 (7103 to 8316)       | 257 (238 to 275)                                   | 289 (267 to 314) | 12.2% (8.3% to 16.7%)                                       |
| Poland                 | 132249 (123697 to 142241) | 163770 (153262 to 177622) | 322 (301 to 346)                                   | 327 (305 to 354) | 1.5% (-1.1% to 4.0%)                                        |
| Romania                | 83378 (78152 to 89666)    | 72662 (67894 to 78563)    | 327 (306 to 352)                                   | 297 (276 to 323) | -9.3% (-12.4% to -6.2%)                                     |
| Serbia                 | 30163 (28050 to 32472)    | 36205 (31742 to 45108)    | 287 (265 to 308)                                   | 341 (296 to 435) | 19.0% (5.7% to 49.8%)                                       |
| Slovakia               | 18681 (17476 to 20094)    | 24557 (22989 to 26578)    | 333 (311 to 359)                                   | 349 (326 to 379) | 4.9% (1.9% to 8.4%)                                         |

1  
2

| Location                           | Prevalence                 |                              |                                                    |                  |                                                             |
|------------------------------------|----------------------------|------------------------------|----------------------------------------------------|------------------|-------------------------------------------------------------|
|                                    | Numbers<br>(95% UI)        |                              | Age-standardized estimates per 100,000<br>(95% UI) |                  | Percentage change of age-standardized<br>estimates (95% UI) |
|                                    | (Year 1990)                | (Year 2019)                  | (Year 1990)                                        | (Year 2019)      | (Year 1990–Year 2019)                                       |
| Slovenia                           | 9245 (8607 to 9977)        | 11433 (10655 to 12393)       | 413 (384 to 445)                                   | 401 (373 to 435) | -2.9% (-6.6% to 0.8%)                                       |
| <b>Central Asia</b>                | 115405 (107057 to 125666)  | 175268 (159927 to 201702)    | 191 (178 to 208)                                   | 186 (170 to 212) | -2.7% (-9.8% to 10.6%)                                      |
| Armenia                            | 15954 (10905 to 25069)     | 9408 (7488 to 12854)         | 483 (332 to 766)                                   | 264 (212 to 358) | -45.3% (-53.4% to -34.9%)                                   |
| Azerbaijan                         | 10359 (9704 to 11027)      | 19475 (17317 to 23953)       | 156 (147 to 166)                                   | 169 (151 to 205) | 8.1% (-1.5% to 30.6%)                                       |
| Georgia                            | 11614 (10921 to 12425)     | 10030 (9083 to 11840)        | 199 (187 to 212)                                   | 236 (211 to 282) | 18.5% (8.9% to 40.7%)                                       |
| Kazakhstan                         | 31263 (29228 to 33341)     | 39097 (36469 to 42064)       | 201 (188 to 215)                                   | 203 (190 to 218) | 1.0% (-1.4% to 3.2%)                                        |
| Kyrgyzstan                         | 6759 (6335 to 7180)        | 10187 (9455 to 11006)        | 179 (168 to 190)                                   | 165 (154 to 178) | -7.7% (-11% to -2.5%)                                       |
| Mongolia                           | 2544 (2390 to 2715)        | 6391 (5970 to 6861)          | 151 (142 to 161)                                   | 184 (172 to 198) | 22.3% (18.4% to 26.1%)                                      |
| Tajikistan                         | 6617 (6202 to 7080)        | 20651 (13792 to 38620)       | 165 (155 to 176)                                   | 237 (160 to 436) | 43.8% (-1.4% to 165.1%)                                     |
| Turkmenistan                       | 4278 (4001 to 4543)        | 7701 (7145 to 8470)          | 144 (135 to 153)                                   | 152 (141 to 167) | 5.7% (0.9% to 13.5%)                                        |
| Uzbekistan                         | 26017 (24383 to 27765)     | 52328 (48703 to 55999)       | 157 (148 to 167)                                   | 158 (147 to 168) | 0.5% (-2.7% to 3.7%)                                        |
| <b>Latin America and Caribbean</b> | 945885 (843370 to 1108550) | 1654334 (1525342 to 1823896) | 288 (260 to 329)                                   | 271 (250 to 299) | -5.8% (-11.6% to -1.4%)                                     |
| <b>Central Latin America</b>       | 422080 (355172 to 564287)  | 656424 (594640 to 761640)    | 311 (271 to 394)                                   | 259 (235 to 300) | -16.8% (-24.4% to -12%)                                     |

39  
40  
41  
42  
43  
44  
45  
46



1

2

3

4

5

6

7

8

9

10

11

12

13

14

15

16

17

18

19

20

21

22

23

24

25

26

27

28

29

30

31

32

33

34

35

36

37

38

39

40

41

42

43

44

45

46

47

48

49

50

51

52

53

54

55

| Location                           | Prevalence                |                           |                                                    |                  |                                                             |
|------------------------------------|---------------------------|---------------------------|----------------------------------------------------|------------------|-------------------------------------------------------------|
|                                    | Numbers<br>(95% UI)       |                           | Age-standardized estimates per 100,000<br>(95% UI) |                  | Percentage change of age-standardized<br>estimates (95% UI) |
|                                    | (Year 1990)               | (Year 2019)               | (Year 1990)                                        | (Year 2019)      | (Year 1990–Year 2019)                                       |
| Colombia                           | 62172 (54456 to 74082)    | 100259 (86297 to 132383)  | 220 (196 to 254)                                   | 196 (169 to 259) | -10.5% (-18.7% to 3.4%)                                     |
| Costa Rica                         | 3776 (3499 to 4080)       | 8130 (7657 to 8739)       | 149 (139 to 160)                                   | 160 (151 to 172) | 7.5% (4.5% to 10.5%)                                        |
| El Salvador                        | 34391 (12461 to 90889)    | 20241 (11797 to 42493)    | 671 (263 to 1743)                                  | 337 (193 to 718) | -49.8% (-59.1% to -26%)                                     |
| Guatemala                          | 21796 (10355 to 49254)    | 29872 (22956 to 46810)    | 308 (158 to 673)                                   | 198 (149 to 318) | -35.6% (-53.6% to -4.6%)                                    |
| Honduras                           | 4381 (4085 to 4715)       | 14252 (12544 to 16931)    | 125 (118 to 133)                                   | 165 (146 to 198) | 32.3% (18.9% to 56.1%)                                      |
| Mexico                             | 241316 (222816 to 264653) | 404685 (374488 to 442322) | 365 (338 to 399)                                   | 319 (295 to 348) | -12.7% (-14.5% to -11.1%)                                   |
| Nicaragua                          | 25022 (7657 to 67214)     | 19884 (9920 to 43869)     | 667 (232 to 1742)                                  | 342 (167 to 760) | -48.7% (-56.3% to -26.6%)                                   |
| Panama                             | 3415 (2840 to 5443)       | 6453 (5833 to 7965)       | 161 (137 to 240)                                   | 154 (139 to 190) | -4.3% (-21.7% to 4.6%)                                      |
| Venezuela (Bolivarian Republic of) | 25812 (23940 to 27785)    | 52649 (47953 to 58203)    | 163 (152 to 174)                                   | 177 (161 to 196) | 9.1% (2.4% to 19.3%)                                        |
| <b>Andean Latin America</b>        | 45203 (35649 to 68463)    | 84038 (74358 to 105119)   | 137 (113 to 195)                                   | 136 (120 to 169) | -1.2% (-13.2% to 7.9%)                                      |
| Bolivia (Plurinational State of)   | 4761 (4505 to 5045)       | 11226 (10592 to 11990)    | 93 (89 to 98)                                      | 103 (97 to 109)  | 10.4% (6.8% to 14.2%)                                       |
| Ecuador                            | 10497 (9440 to 12158)     | 23004 (21613 to 24784)    | 129 (117 to 147)                                   | 136 (127 to 146) | 5.4% (-1.9% to 11.3%)                                       |
| Peru                               | 29944 (20967 to 51939)    | 49807 (41420 to 70628)    | 154 (114 to 249)                                   | 146 (121 to 205) | -5.4% (-19.7% to 7.5%)                                      |

1  
2

| Location                         | Prevalence             |                          |                                                    |                  |                                                             |
|----------------------------------|------------------------|--------------------------|----------------------------------------------------|------------------|-------------------------------------------------------------|
|                                  | Numbers<br>(95% UI)    |                          | Age-standardized estimates per 100,000<br>(95% UI) |                  | Percentage change of age-standardized<br>estimates (95% UI) |
|                                  | (Year 1990)            | (Year 2019)              | (Year 1990)                                        | (Year 2019)      | (Year 1990–Year 2019)                                       |
| <b>Caribbean</b>                 | 45566 (43184 to 48167) | 118136 (93316 to 165454) | 145 (138 to 153)                                   | 239 (188 to 336) | 64.8% (29.1% to 131.2%)                                     |
| Antigua and Barbuda              | 64 (60 to 68)          | 133 (124 to 142)         | 113 (106 to 120)                                   | 131 (123 to 140) | 16.2% (13.2% to 19.6%)                                      |
| Bahamas                          | 251 (236 to 266)       | 513 (487 to 543)         | 107 (102 to 113)                                   | 123 (117 to 130) | 14.8% (10.7% to 18.7%)                                      |
| Barbados                         | 272 (255 to 289)       | 426 (403 to 451)         | 105 (98 to 111)                                    | 117 (111 to 124) | 12.0% (8.4% to 15.3%)                                       |
| Belize                           | 166 (153 to 184)       | 525 (488 to 578)         | 118 (110 to 129)                                   | 138 (128 to 152) | 16.5% (12.4% to 21.5%)                                      |
| Bermuda                          | 165 (154 to 177)       | 259 (242 to 278)         | 248 (232 to 266)                                   | 297 (277 to 319) | 19.7% (15.2% to 24.9%)                                      |
| Cuba                             | 16409 (15431 to 17403) | 23861 (22638 to 25300)   | 150 (141 to 158)                                   | 162 (153 to 171) | 8.3% (3.6% to 12.4%)                                        |
| Dominica                         | 71 (65 to 82)          | 101 (91 to 117)          | 107 (98 to 122)                                    | 131 (119 to 150) | 22.5% (9.8% to 39.5%)                                       |
| Dominican Republic               | 6180 (5782 to 6599)    | 14734 (13824 to 15659)   | 107 (101 to 114)                                   | 138 (130 to 146) | 28.4% (24.5% to 32.9%)                                      |
| Grenada                          | 102 (77 to 169)        | 149 (137 to 171)         | 136 (104 to 218)                                   | 133 (122 to 153) | -2.1% (-29.9% to 20.1%)                                     |
| Guyana                           | 710 (663 to 781)       | 973 (916 to 1048)        | 107 (101 to 117)                                   | 127 (120 to 137) | 18.5% (14.7% to 21.7%)                                      |
| Haiti                            | 4542 (4299 to 4839)    | 49888 (26327 to 93675)   | 88 (83 to 93)                                      | 431 (230 to 813) | 391% (164.9% to 805.4%)                                     |
| Jamaica                          | 2379 (2231 to 2558)    | 3502 (3305 to 3721)      | 116 (109 to 124)                                   | 117 (111 to 125) | 1.1% (-1.7% to 3.9%)                                        |
| Puerto Rico                      | 10610 (9955 to 11350)  | 15476 (14251 to 17427)   | 293 (275 to 313)                                   | 330 (303 to 374) | 12.6% (5.7% to 25.2%)                                       |
| Saint Kitts and Nevis            | 77 (72 to 82)          | 174 (163 to 186)         | 213 (200 to 226)                                   | 257 (241 to 276) | 21.1% (17.0% to 25.0%)                                      |
| Saint Lucia                      | 121 (113 to 131)       | 255 (240 to 270)         | 107 (100 to 115)                                   | 126 (119 to 134) | 17.7% (13.2% to 21.8%)                                      |
| Saint Vincent and the Grenadines | 93 (87 to 99)          | 147 (139 to 156)         | 102 (96 to 109)                                    | 117 (111 to 125) | 14.9% (10.4% to 19.9%)                                      |
| Suriname                         | 445 (366 to 702)       | 759 (696 to 904)         | 126 (106 to 190)                                   | 125 (115 to 147) | -1.0% (-23.1% to 10.7%)                                     |
| Trinidad and Tobago              | 1133 (1056 to 1227)    | 1950 (1844 to 2084)      | 103 (96 to 111)                                    | 121 (114 to 129) | 17.3% (13.6% to 20.4%)                                      |

41  
42  
43  
44  
45  
46

| Location                                      | Prevalence                   |                              |                                                    |                  |                                                             |
|-----------------------------------------------|------------------------------|------------------------------|----------------------------------------------------|------------------|-------------------------------------------------------------|
|                                               | Numbers<br>(95% UI)          |                              | Age-standardized estimates per 100,000<br>(95% UI) |                  | Percentage change of age-standardized<br>estimates (95% UI) |
|                                               | (Year 1990)                  | (Year 2019)                  | (Year 1990)                                        | (Year 2019)      | (Year 1990–Year 2019)                                       |
| United States Virgin Islands                  | 260 (244 to 276)             | 310 (294 to 330)             | 250 (235 to 266)                                   | 241 (229 to 256) | -3.4% (-6.9% to 0.2%)                                       |
| <b>Tropical Latin America</b>                 | 433036 (398417 to 474467)    | 795736 (733802 to 868808)    | 333 (308 to 363)                                   | 325 (299 to 355) | -2.5% (-5.4% to 0.3%)                                       |
| Brazil                                        | 428811 (394414 to 470171)    | 786832 (725507 to 859364)    | 338 (312 to 369)                                   | 330 (304 to 360) | -2.4% (-5.3% to 0.5%)                                       |
| Paraguay                                      | 4224 (3901 to 4636)          | 8904 (8300 to 9587)          | 133 (124 to 144)                                   | 133 (125 to 143) | 0.2% (-3.4% to 3.3%)                                        |
| <b>Southeast Asia, East Asia, and Oceania</b> | 2869879 (2659889 to 3149019) | 6408788 (5994232 to 6934620) | 189 (176 to 207)                                   | 245 (229 to 265) | 29.5% (24.5% to 33.7%)                                      |
| <b>East Asia</b>                              | 2174815 (2017401 to 2348060) | 5147994 (4799710 to 5551476) | 193 (180 to 208)                                   | 266 (249 to 287) | 38.0% (34.1% to 42.4%)                                      |
| China                                         | 2139839 (1983005 to 2312296) | 5096258 (4750056 to 5499035) | 197 (183 to 213)                                   | 273 (255 to 294) | 38.7% (34.7% to 43.2%)                                      |
| Democratic People's Republic of Korea         | 14339 (13493 to 15314)       | 21809 (20610 to 23210)       | 72 (68 to 77)                                      | 70 (66 to 74)    | -3.5% (-7.1% to 0.8%)                                       |
| Taiwan (Province of China)                    | 20637 (19362 to 21924)       | 29927 (28119 to 32019)       | 106 (100 to 113)                                   | 91 (86 to 97)    | -14.3% (-18.4% to -10.0%)                                   |
| <b>Southeast Asia</b>                         | 690953 (602962 to 898824)    | 1249313 (1128418 to 1450442) | 176 (158 to 220)                                   | 179 (162 to 206) | 1.3% (-10.7% to 9.4%)                                       |
| Cambodia                                      | 29805 (8827 to 99033)        | 27229 (17353 to 57818)       | 311 (107 to 991)                                   | 179 (114 to 386) | -42.4% (-62.6% to 8.8%)                                     |
| Indonesia                                     | 371199 (342075 to 415584)    | 624426 (577523 to 681498)    | 244 (226 to 269)                                   | 236 (218 to 257) | -3.4% (-9.0% to 1.7%)                                       |
| Laos People's Democratic Republic             | 2735 (2537 to 2982)          | 6076 (5689 to 6527)          | 85 (79 to 91)                                      | 95 (89 to 101)   | 11.3% (8.3% to 14.3%)                                       |

1  
2  
3  
4  
5  
6  
7  
8  
9  
10  
11  
12  
13  
14  
15  
16  
17  
18  
19  
20  
21  
22  
23  
24  
25  
26  
27  
28  
29  
30  
31  
32  
33  
34  
35  
36  
37  
38  
39  
40  
41  
42  
43  
44  
45  
46

| Location         | Prevalence              |                           |                                                    |                  |                                                             |
|------------------|-------------------------|---------------------------|----------------------------------------------------|------------------|-------------------------------------------------------------|
|                  | Numbers<br>(95% UI)     |                           | Age-standardized estimates per 100,000<br>(95% UI) |                  | Percentage change of age-standardized<br>estimates (95% UI) |
|                  | (Year 1990)             | (Year 2019)               | (Year 1990)                                        | (Year 2019)      | (Year 1990–Year 2019)                                       |
| Malaysia         | 15417 (14482 to 16507)  | 38532 (36236 to 41114)    | 107 (101 to 114)                                   | 122 (114 to 130) | 13.1% (10.3% to 15.8%)                                      |
| Maldives         | 124 (117 to 131)        | 566 (518 to 639)          | 81 (77 to 86)                                      | 113 (104 to 126) | 39.2% (30.0% to 55.1%)                                      |
| Mauritius        | 1930 (1813 to 2073)     | 3734 (3493 to 4032)       | 188 (177 to 201)                                   | 240 (224 to 258) | 27.7% (22.6% to 33.7%)                                      |
| Myanmar          | 45843 (31351 to 98916)  | 95561 (72067 to 134781)   | 124 (90 to 251)                                    | 174 (132 to 244) | 40.0% (-11.8% to 104.1%)                                    |
| Philippines      | 70220 (53653 to 111258) | 127472 (109169 to 165496) | 137 (110 to 204)                                   | 125 (107 to 162) | -8.8% (-24% to 1.4%)                                        |
| Seychelles       | 126 (118 to 135)        | 267 (250 to 287)          | 197 (184 to 210)                                   | 230 (215 to 246) | 16.5% (12.4% to 20.4%)                                      |
| Sri Lanka        | 28614 (20202 to 48485)  | 72326 (44291 to 142831)   | 176 (130 to 285)                                   | 304 (184 to 605) | 72.2% (36.7% to 119%)                                       |
| Thailand         | 67897 (63611 to 72766)  | 112221 (105208 to 121967) | 131 (123 to 140)                                   | 125 (117 to 137) | -4.6% (-8.2% to 0.0%)                                       |
| Timor-Leste      | 2771 (998 to 7454)      | 3636 (1543 to 9215)       | 372 (146 to 974)                                   | 355 (150 to 902) | -4.7% (-10.6% to 3.9%)                                      |
| Viet Nam         | 53354 (50294 to 56627)  | 135628 (127816 to 144368) | 100 (95 to 106)                                    | 129 (122 to 138) | 29.0% (25.6% to 32.8%)                                      |
| <b>Oceania</b>   | 4111 (3871 to 4403)     | 11481 (10493 to 12939)    | 82 (78 to 88)                                      | 104 (95 to 117)  | 26.0% (19.6% to 36.0%)                                      |
| American Samoa   | 72 (67 to 77)           | 119 (108 to 134)          | 193 (181 to 207)                                   | 224 (204 to 252) | 16.1% (8.1% to 29.6%)                                       |
| Cook Islands     | 37 (34 to 40)           | 52 (48 to 57)             | 227 (210 to 246)                                   | 252 (232 to 276) | 11.4% (6.8% to 16.4%)                                       |
| Fiji             | 484 (448 to 524)        | 773 (714 to 844)          | 75 (70 to 80)                                      | 85 (78 to 93)    | 13.4% (9.8% to 17.5%)                                       |
| Guam             | 256 (238 to 277)        | 403 (375 to 441)          | 214 (200 to 231)                                   | 224 (209 to 245) | 4.9% (0.6% to 9.1%)                                         |
| Kiribati         | 32 (30 to 35)           | 65 (59 to 72)             | 52 (48 to 56)                                      | 60 (56 to 66)    | 16.4% (10.6% to 25.9%)                                      |
| Marshall Islands | 24 (22 to 25)           | 43 (40 to 46)             | 76 (72 to 82)                                      | 82 (76 to 88)    | 7.1% (4.6% to 9.6%)                                         |

1  
2  
3  
4  
5  
6  
7  
8  
9  
10  
11  
12  
13  
14  
15  
16  
17  
18  
19  
20  
21  
22  
23  
24  
25  
26  
27  
28  
29  
30  
31  
32  
33  
34  
35  
36  
37  
38  
39  
40  
41  
42  
43  
44  
45  
46

| Location                            | Prevalence                 |                             |                                                    |                   |                                                             |
|-------------------------------------|----------------------------|-----------------------------|----------------------------------------------------|-------------------|-------------------------------------------------------------|
|                                     | Numbers<br>(95% UI)        |                             | Age-standardized estimates per 100,000<br>(95% UI) |                   | Percentage change of age-standardized<br>estimates (95% UI) |
|                                     | (Year 1990)                | (Year 2019)                 | (Year 1990)                                        | (Year 2019)       | (Year 1990–Year 2019)                                       |
| Micronesia (Federated States of)    | 57 (53 to 62)              | 86 (78 to 95)               | 75 (70 to 81)                                      | 90 (82 to 99)     | 19.5% (14.1% to 28.3%)                                      |
| Nauru                               | 13 (12 to 14)              | 16 (15 to 18)               | 162 (152 to 173)                                   | 185 (172 to 201)  | 14.8% (10.7% to 19.3%)                                      |
| Niue                                | 4 (3 to 4)                 | 4 (4 to 4)                  | 173 (161 to 185)                                   | 216 (200 to 237)  | 24.8% (19.3% to 32.7%)                                      |
| Northern Mariana Islands            | 95 (88 to 104)             | 128 (119 to 140)            | 239 (223 to 258)                                   | 251 (232 to 273)  | 5.1% (0.7% to 9.5%)                                         |
| Palau                               | 32 (30 to 34)              | 60 (55 to 65)               | 233 (217 to 252)                                   | 272 (252 to 298)  | 17.1% (13.5% to 20.7%)                                      |
| Papua New Guinea                    | 2311 (2175 to 2472)        | 8120 (7373 to 9247)         | 74 (70 to 79)                                      | 101 (92 to 114)   | 35.9% (27.3% to 49.4%)                                      |
| Samoa                               | 104 (97 to 112)            | 239 (201 to 303)            | 84 (79 to 90)                                      | 128 (109 to 162)  | 52.3% (31.5% to 89.9%)                                      |
| Solomon Islands                     | 202 (181 to 234)           | 501 (460 to 558)            | 83 (75 to 94)                                      | 95 (87 to 105)    | 14.4% (8.0% to 19.4%)                                       |
| Tokelau                             | 2 (2 to 2)                 | 2 (2 to 3)                  | 150 (140 to 160)                                   | 187 (174 to 202)  | 24.7% (20.5% to 29.7%)                                      |
| Tonga                               | 58 (54 to 62)              | 75 (70 to 81)               | 78 (73 to 84)                                      | 83 (78 to 90)     | 6.6% (2.3% to 11.6%)                                        |
| Tuvalu                              | 12 (11 to 12)              | 20 (18 to 21)               | 140 (132 to 149)                                   | 173 (161 to 187)  | 23.8% (19.7% to 29.0%)                                      |
| Vanuatu                             | 91 (80 to 110)             | 232 (201 to 282)            | 78 (69 to 93)                                      | 94 (81 to 113)    | 19.5% (12.7% to 28.5%)                                      |
| <b>North Africa and Middle East</b> | 761978 (412124 to 1681726) | 1597740 (989333 to 3176105) | 252 (145 to 518)                                   | 264 (166 to 520)  | 5.0% (-19.4% to 21.4%)                                      |
| <b>North Africa and Middle East</b> | 761978 (412124 to 1681726) | 1597740 (989333 to 3176105) | 252 (145 to 518)                                   | 264 (166 to 520)  | 5.0% (-19.4% to 21.4%)                                      |
| Afghanistan                         | 170410 (21376 to 675039)   | 229275 (64978 to 655574)    | 1558 (216 to 6103)                                 | 810 (225 to 2351) | -48.0% (-65.9% to 41.6%)                                    |
| Algeria                             | 25519 (23487 to 27768)     | 67773 (56104 to 95193)      | 133 (124 to 145)                                   | 160 (134 to 221)  | 20.1% (2.5% to 61.7%)                                       |
| Bahrain                             | 549 (503 to 619)           | 2464 (2288 to 2677)         | 118 (109 to 133)                                   | 137 (128 to 149)  | 16.2% (8.9% to 22.2%)                                       |
| Egypt                               | 40374 (38033 to 43009)     | 91724 (85282 to 100309)     | 88 (83 to 93)                                      | 100 (93 to 108)   | 13.8% (8.4% to 21.8%)                                       |

1  
2  
3  
4  
5  
6  
7  
8  
9  
10  
11  
12  
13  
14  
15  
16  
17  
18  
19  
20  
21  
22  
23  
24  
25  
26  
27  
28  
29  
30  
31  
32  
33  
34  
35  
36  
37  
38  
39  
40  
41  
42  
43  
44  
45  
46

| Location                   | Prevalence               |                           |                                                    |                    |                                                             |
|----------------------------|--------------------------|---------------------------|----------------------------------------------------|--------------------|-------------------------------------------------------------|
|                            | Numbers<br>(95% UI)      |                           | Age-standardized estimates per 100,000<br>(95% UI) |                    | Percentage change of age-standardized<br>estimates (95% UI) |
|                            | (Year 1990)              | (Year 2019)               | (Year 1990)                                        | (Year 2019)        | (Year 1990–Year 2019)                                       |
| Iran (Islamic Republic of) | 153375 (88594 to 316280) | 192392 (147592 to 289632) | 333 (200 to 673)                                   | 209 (163 to 308)   | -37.1% (-55.4% to -15%)                                     |
| Iraq                       | 141309 (44811 to 400279) | 275649 (100535 to 735044) | 905 (308 to 2513)                                  | 694 (261 to 1839)  | -23.3% (-32.7% to -11.6%)                                   |
| Jordan                     | 2840 (2672 to 3012)      | 12356 (11428 to 13714)    | 106 (100 to 112)                                   | 118 (110 to 129)   | 10.9% (5.8% to 19.5%)                                       |
| Kuwait                     | 2499 (2200 to 3098)      | 8925 (7309 to 12662)      | 159 (143 to 190)                                   | 179 (150 to 246)   | 12.6% (3.7% to 28.4%)                                       |
| Lebanon                    | 24895 (6752 to 81123)    | 21407 (8783 to 61368)     | 804 (228 to 2582)                                  | 400 (164 to 1148)  | -50.2% (-57.6% to -27.9%)                                   |
| Libya                      | 5625 (4142 to 9380)      | 20977 (12852 to 41589)    | 168 (134 to 249)                                   | 287 (177 to 573)   | 71.0% (31.2% to 126.2%)                                     |
| Morocco                    | 27077 (24049 to 33304)   | 49136 (45658 to 53596)    | 128 (116 to 152)                                   | 133 (124 to 145)   | 4.1% (-6.6% to 10.5%)                                       |
| Oman                       | 2197 (2040 to 2360)      | 7431 (6863 to 8020)       | 147 (137 to 157)                                   | 160 (150 to 171)   | 9.3% (5.5% to 13.7%)                                        |
| Palestine                  | 13014 (4565 to 34264)    | 34617 (12023 to 92970)    | 701 (271 to 1799)                                  | 814 (289 to 2164)  | 16.1% (1.3% to 24.0%)                                       |
| Qatar                      | 757 (704 to 818)         | 5438 (5015 to 5874)       | 172 (162 to 185)                                   | 172 (160 to 184)   | -0.5% (-4.4% to 3.4%)                                       |
| Saudi Arabia               | 23679 (22193 to 25441)   | 99232 (90735 to 108803)   | 202 (189 to 216)                                   | 256 (237 to 279)   | 27.2% (21.8% to 32.6%)                                      |
| Sudan                      | 32065 (26718 to 44313)   | 88763 (69261 to 135844)   | 208 (179 to 272)                                   | 274 (218 to 405)   | 31.5% (19.6% to 50.5%)                                      |
| Syrian Arab Republic       | 16275 (9261 to 39605)    | 146780 (46392 to 407902)  | 157 (99 to 352)                                    | 1049 (333 to 2942) | 567.8% (215.4% to 1184.7%)                                  |

| Location             | Prevalence                   |                              |                                                    |                  |                                                             |
|----------------------|------------------------------|------------------------------|----------------------------------------------------|------------------|-------------------------------------------------------------|
|                      | Numbers<br>(95% UI)          |                              | Age-standardized estimates per 100,000<br>(95% UI) |                  | Percentage change of age-standardized<br>estimates (95% UI) |
|                      | (Year 1990)                  | (Year 2019)                  | (Year 1990)                                        | (Year 2019)      | (Year 1990–Year 2019)                                       |
|                      | Tunisia                      | 8279 (7740 to 9006)          | 16698 (15691 to 17935)                             | 120 (112 to 130) | 130 (122 to 140)                                            |
| Turkey               | 52416 (49089 to 56145)       | 139191 (121472 to 172113)    | 102 (96 to 109)                                    | 151 (132 to 188) | 47.9% (32.9% to 75.7%)                                      |
| United Arab Emirates | 2490 (2314 to 2700)          | 17277 (16071 to 18581)       | 140 (132 to 151)                                   | 139 (131 to 148) | -1.2% (-5.1% to 1.8%)                                       |
| Yemen                | 15821 (10321 to 29852)       | 68611 (34516 to 160572)      | 149 (108 to 252)                                   | 260 (137 to 595) | 74.1% (25.0% to 134.1%)                                     |
| South Asia           | 1313358 (1235439 to 1395741) | 3161582 (2952968 to 3412943) | 153 (145 to 162)                                   | 188 (176 to 202) | 22.9% (19.5% to 27.1%)                                      |
| South Asia           | 1313358 (1235439 to 1395741) | 3161582 (2952968 to 3412943) | 153 (145 to 162)                                   | 188 (176 to 202) | 22.9% (19.5% to 27.1%)                                      |
| Bangladesh           | 84744 (77080 to 94106)       | 229245 (204809 to 265803)    | 105 (97 to 115)                                    | 148 (132 to 171) | 41.0% (33.7% to 50.7%)                                      |
| Bhutan               | 509 (475 to 545)             | 1192 (1113 to 1276)          | 115 (108 to 123)                                   | 166 (156 to 177) | 43.6% (37.9% to 50.9%)                                      |
| India                | 1134037 (1065345 to 1209041) | 2620689 (2458704 to 2800787) | 166 (157 to 177)                                   | 197 (185 to 211) | 18.6% (15.6% to 21.5%)                                      |
| Nepal                | 17788 (16718 to 19069)       | 50961 (44198 to 63223)       | 121 (115 to 129)                                   | 183 (160 to 222) | 50.6% (35.5% to 80.4%)                                      |
| Pakistan             | 76281 (71641 to 80906)       | 259494 (229416 to 318122)    | 95 (89 to 101)                                     | 144 (129 to 172) | 51.5% (37.9% to 77.7%)                                      |
| Sub-Saharan Africa   | 711974 (573802 to 1072304)   | 1683535 (1394868 to 2363973) | 193 (164 to 265)                                   | 211 (177 to 288) | 9.1% (4.8% to 13.0%)                                        |

1  
2  
3  
4  
5  
6  
7  
8  
9  
10  
11  
12  
13  
14  
15  
16  
17  
18  
19  
20  
21  
22  
23  
24  
25  
26  
27  
28  
29  
30  
31  
32  
33  
34  
35  
36  
37  
38  
39  
40  
41  
42  
43  
44  
45  
46

| Location                           | Prevalence                |                           |                                                    |                  |                                                             |
|------------------------------------|---------------------------|---------------------------|----------------------------------------------------|------------------|-------------------------------------------------------------|
|                                    | Numbers<br>(95% UI)       |                           | Age-standardized estimates per 100,000<br>(95% UI) |                  | Percentage change of age-standardized<br>estimates (95% UI) |
|                                    | (Year 1990)               | (Year 2019)               | (Year 1990)                                        | (Year 2019)      | (Year 1990–Year 2019)                                       |
| <b>Southern Sub-Saharan Africa</b> | 88483 (81203 to 100702)   | 125520 (117191 to 135338) | 214 (198 to 239)                                   | 171 (160 to 184) | -20.3% (-25.3% to -17.5%)                                   |
| Botswana                           | 1540 (1432 to 1663)       | 3919 (3628 to 4221)       | 157 (147 to 169)                                   | 178 (166 to 191) | 13.3% (10.5% to 16.5%)                                      |
| Eswatini                           | 853 (795 to 913)          | 1458 (1350 to 1563)       | 154 (145 to 165)                                   | 150 (140 to 160) | -3.1% (-5.3% to -0.7%)                                      |
| Lesotho                            | 2067 (1925 to 2219)       | 2692 (2508 to 2885)       | 146 (136 to 156)                                   | 139 (130 to 149) | -4.7% (-7.5% to -1.2%)                                      |
| Namibia                            | 3028 (2000 to 5729)       | 4126 (3720 to 4849)       | 260 (184 to 449)                                   | 201 (182 to 237) | -22.6% (-48.4% to 1.6%)                                     |
| South Africa                       | 70255 (64677 to 80330)    | 96685 (90104 to 104482)   | 232 (214 to 261)                                   | 176 (165 to 190) | -24.1% (-29.5% to -21.1%)                                   |
| Zimbabwe                           | 10739 (9999 to 11655)     | 16640 (15505 to 17907)    | 151 (142 to 163)                                   | 140 (132 to 151) | -7.3% (-9.5% to -5.0%)                                      |
| <b>Western Sub-Saharan Africa</b>  | 246022 (228652 to 265737) | 686804 (626081 to 784464) | 183 (171 to 197)                                   | 215 (198 to 241) | 17.7% (14.0% to 26.0%)                                      |
| Benin                              | 5790 (5410 to 6173)       | 17311 (16106 to 18602)    | 187 (175 to 199)                                   | 207 (193 to 222) | 11.1% (8.9% to 13.4%)                                       |
| Burkina Faso                       | 10229 (9563 to 10973)     | 32023 (29801 to 34408)    | 161 (151 to 173)                                   | 212 (198 to 228) | 32.0% (29.5% to 34.7%)                                      |
| Cabo Verde                         | 482 (452 to 515)          | 1197 (1120 to 1284)       | 187 (176 to 200)                                   | 229 (215 to 245) | 22.3% (19.4% to 25.5%)                                      |
| Cameroon                           | 15328 (14138 to 16623)    | 48942 (44632 to 54262)    | 219 (202 to 236)                                   | 234 (214 to 256) | 6.8% (2.4% to 12.4%)                                        |
| Chad                               | 10278 (7050 to 18421)     | 22401 (19089 to 30056)    | 231 (170 to 381)                                   | 225 (193 to 296) | -2.6% (-23.6% to 14.9%)                                     |
| Côte d'Ivoire                      | 14611 (13535 to 15712)    | 39548 (36200 to 43009)    | 183 (171 to 196)                                   | 206 (191 to 222) | 12.7% (9.8% to 17.8%)                                       |
| Gambia                             | 1241 (1073 to 1596)       | 3008 (2775 to 3265)       | 187 (166 to 230)                                   | 189 (175 to 206) | 1.4% (-12.1% to 8.9%)                                       |



| Location                          | Prevalence                |                            |                                                    |                   |                                                             |
|-----------------------------------|---------------------------|----------------------------|----------------------------------------------------|-------------------|-------------------------------------------------------------|
|                                   | Numbers<br>(95% UI)       |                            | Age-standardized estimates per 100,000<br>(95% UI) |                   | Percentage change of age-standardized<br>estimates (95% UI) |
|                                   | (Year 1990)               | (Year 2019)                | (Year 1990)                                        | (Year 2019)       | (Year 1990–Year 2019)                                       |
|                                   | Ghana                     | 21026 (19340 to 22809)     | 62838 (57513 to 68360)                             | 201 (186 to 217)  | 248 (228 to 270)                                            |
| Guinea                            | 7872 (7352 to 8437)       | 17737 (16424 to 19192)     | 177 (166 to 190)                                   | 205 (190 to 221)  | 15.8% (12.5% to 20.8%)                                      |
| Guinea-Bissau                     | 1353 (1241 to 1470)       | 3078 (2793 to 3426)        | 194 (178 to 210)                                   | 222 (202 to 246)  | 14.5% (9.4% to 24.1%)                                       |
| Liberia                           | 2948 (2450 to 4176)       | 10240 (6993 to 18359)      | 195 (167 to 258)                                   | 276 (195 to 483)  | 41.5% (14.8% to 87.6%)                                      |
| Mali                              | 10345 (9609 to 11118)     | 33763 (27877 to 47737)     | 172 (161 to 185)                                   | 235 (198 to 321)  | 36.6% (18.2% to 81.7%)                                      |
| Mauritania                        | 3502 (3209 to 3805)       | 7623 (7004 to 8283)        | 241 (221 to 262)                                   | 257 (236 to 279)  | 6.5% (4.7% to 8.1%)                                         |
| Niger                             | 8807 (8185 to 9456)       | 26780 (24637 to 29399)     | 174 (163 to 186)                                   | 196 (182 to 212)  | 12.7% (9.9% to 16.3%)                                       |
| Nigeria                           | 113598 (105957 to 122265) | 307508 (280722 to 351514)  | 175 (165 to 189)                                   | 205 (189 to 228)  | 16.8% (12% to 27.8%)                                        |
| Sao Tome and Principe             | 178 (165 to 192)          | 415 (386 to 446)           | 209 (196 to 224)                                   | 257 (241 to 276)  | 22.9% (19.3% to 26.1%)                                      |
| Senegal                           | 8905 (8247 to 9569)       | 22726 (20984 to 24629)     | 177 (164 to 190)                                   | 205 (190 to 223)  | 16.3% (13.4% to 20.4%)                                      |
| Sierra Leone                      | 4598 (4290 to 4915)       | 16180 (12691 to 24462)     | 171 (160 to 183)                                   | 265 (211 to 392)  | 54.6% (24.7% to 126.6%)                                     |
| Togo                              | 4922 (4539 to 5336)       | 13475 (12407 to 14597)     | 208 (193 to 224)                                   | 220 (204 to 238)  | 6.1% (3.8% to 8.9%)                                         |
| <b>Eastern Sub-Saharan Africa</b> | 322647 (219213 to 603862) | 712913 (537596 to 1156257) | 216 (159 to 366)                                   | 234 (179 to 377)  | 8.3% (-3.2% to 15.3%)                                       |
| Burundi                           | 3190 (2954 to 3414)       | 67502 (22199 to 188953)    | 78 (73 to 83)                                      | 703 (242 to 1936) | 799.8% (206.9% to 2316.4%)                                  |

1  
2  
3  
4  
5  
6  
7  
8  
9  
10  
11  
12  
13  
14  
15  
16  
17  
18  
19  
20  
21  
22  
23  
24  
25  
26  
27  
28  
29  
30  
31  
32  
33  
34  
35  
36  
37  
38  
39  
40  
41  
42  
43  
44  
45  
46

| Location                    | Prevalence              |                          |                                                    |                   |                                                             |
|-----------------------------|-------------------------|--------------------------|----------------------------------------------------|-------------------|-------------------------------------------------------------|
|                             | Numbers<br>(95% UI)     |                          | Age-standardized estimates per 100,000<br>(95% UI) |                   | Percentage change of age-standardized<br>estimates (95% UI) |
|                             | (Year 1990)             | (Year 2019)              | (Year 1990)                                        | (Year 2019)       | (Year 1990–Year 2019)                                       |
| Comoros                     | 838 (775 to 905)        | 1849 (1703 to 2001)      | 252 (234 to 271)                                   | 291 (269 to 315)  | 15.7% (12.9% to 18.5%)                                      |
| Djibouti                    | 754 (692 to 822)        | 2603 (2361 to 2969)      | 230 (214 to 249)                                   | 254 (233 to 287)  | 10.3% (5.6% to 20%)                                         |
| Eritrea                     | 27056 (7937 to 76851)   | 23173 (13141 to 51188)   | 967 (318 to 2678)                                  | 449 (255 to 978)  | -53.5% (-64.8% to -19.5%)                                   |
| Ethiopia                    | 75914 (41139 to 165521) | 140703 (87440 to 285059) | 171 (105 to 344)                                   | 182 (114 to 366)  | 6.0% (-7.0% to 29.3%)                                       |
| Kenya                       | 13839 (12959 to 14779)  | 40838 (36708 to 49228)   | 89 (84 to 94)                                      | 100 (92 to 116)   | 13.0% (5.7% to 30.0%)                                       |
| Madagascar                  | 18232 (16806 to 19829)  | 44949 (41190 to 49020)   | 214 (198 to 232)                                   | 221 (204 to 240)  | 3.3% (0.4% to 6.1%)                                         |
| Malawi                      | 11285 (10462 to 12176)  | 25880 (23743 to 28080)   | 164 (154 to 177)                                   | 193 (179 to 208)  | 17.1% (13.5% to 20.6%)                                      |
| Mozambique                  | 49506 (25560 to 115606) | 54653 (47593 to 69114)   | 456 (259 to 995)                                   | 275 (237 to 357)  | -39.7% (-64.2% to -6.4%)                                    |
| Rwanda                      | 12008 (10930 to 13304)  | 62514 (31791 to 142164)  | 235 (215 to 256)                                   | 605 (316 to 1347) | 157.9% (37.2% to 467.9%)                                    |
| Somalia                     | 11992 (8174 to 33180)   | 38706 (28493 to 65501)   | 218 (161 to 518)                                   | 259 (199 to 421)  | 19.0% (-34.3% to 71.2%)                                     |
| South Sudan                 | 12203 (9589 to 18634)   | 23709 (16946 to 41158)   | 279 (231 to 394)                                   | 344 (255 to 567)  | 23.3% (8.9% to 45.7%)                                       |
| Uganda                      | 42654 (22535 to 100043) | 69689 (60102 to 90469)   | 305 (177 to 675)                                   | 254 (219 to 333)  | -16.5% (-49.7% to 25.6%)                                    |
| United Republic of Tanzania | 34334 (31696 to 36935)  | 90556 (83657 to 98054)   | 189 (176 to 203)                                   | 220 (206 to 237)  | 16.7% (14.1% to 19.2%)                                      |

1  
2  
3  
4  
5  
6  
7  
8  
9  
10  
11  
12  
13  
14  
15  
16  
17  
18  
19  
20  
21  
22  
23  
24  
25  
26  
27  
28  
29  
30  
31  
32  
33  
34  
35  
36  
37  
38  
39  
40  
41  
42  
43  
44  
45  
46

| Location                          | Prevalence              |                          |                                                    |                  |                                                             |
|-----------------------------------|-------------------------|--------------------------|----------------------------------------------------|------------------|-------------------------------------------------------------|
|                                   | Numbers<br>(95% UI)     |                          | Age-standardized estimates per 100,000<br>(95% UI) |                  | Percentage change of age-standardized<br>estimates (95% UI) |
|                                   | (Year 1990)             | (Year 2019)              | (Year 1990)                                        | (Year 2019)      | (Year 1990–Year 2019)                                       |
| Zambia                            | 8607 (7922 to 9298)     | 25020 (22961 to 27064)   | 158 (148 to 170)                                   | 188 (175 to 203) | 18.7% (14.9% to 22.6%)                                      |
| <b>Central Sub-Saharan Africa</b> | 54823 (33715 to 110269) | 158299 (92933 to 330433) | 118 (79 to 217)                                    | 154 (93 to 313)  | 30.4% (16.9% to 44.5%)                                      |
| Angola                            | 32214 (11520 to 87247)  | 45818 (23083 to 106888)  | 330 (131 to 869)                                   | 217 (109 to 508) | -34.2% (-42.1% to -15.1%)                                   |
| Central African Republic          | 1161 (1082 to 1243)     | 9062 (4135 to 21755)     | 55 (52 to 58)                                      | 178 (89 to 409)  | 224.5% (63.6% to 624%)                                      |
| Congo                             | 1171 (1094 to 1254)     | 8752 (4373 to 19792)     | 63 (60 to 68)                                      | 184 (96 to 407)  | 191.1% (55.0% to 531%)                                      |
| Democratic Republic of the Congo  | 19452 (18069 to 20914)  | 92511 (58980 to 179752)  | 69 (65 to 74)                                      | 132 (88 to 245)  | 90.4% (29.4% to 249.7%)                                     |
| Equatorial Guinea                 | 195 (182 to 209)        | 830 (772 to 898)         | 61 (58 to 65)                                      | 77 (73 to 82)    | 26.2% (22.1% to 30.4%)                                      |
| Gabon                             | 631 (593 to 673)        | 1326 (1248 to 1413)      | 81 (77 to 86)                                      | 86 (82 to 92)    | 6.5% (4.2% to 8.9%)                                         |

Abbreviations: UI, uncertainty interval

Table 13. Years lived with disability for 1990 and 2019 and percentage changes of age-standardized rates by location for spinal cord injury, 1990–2019

| Location                  | YLD                          |                              |                                                |                 |                                                         |
|---------------------------|------------------------------|------------------------------|------------------------------------------------|-----------------|---------------------------------------------------------|
|                           | Numbers<br>(95% UI)          |                              | Age-standardized rates per 100,000<br>(95% UI) |                 | Percentage change of age-standardized rates<br>(95% UI) |
|                           | (Year 1990)                  | (Year 2019)                  | (Year 1990)                                    | (Year 2019)     | (Year 1990–Year 2019)                                   |
| Global                    | 3748672 (2702778 to 4951850) | 6200809 (4465317 to 8156193) | 77 (56 to 101)                                 | 76 (55 to 100)  | -1.5% (-5.6% to 3.3%)                                   |
| High-income               | 885050 (632972 to 1135187)   | 1210171 (857173 to 1553079)  | 86 (62 to 111)                                 | 84 (59 to 108)  | -2.8% (-4.7% to -1.1%)                                  |
| High-income North America | 383372 (273104 to 493551)    | 543327 (382768 to 696793)    | 123 (87 to 159)                                | 113 (80 to 146) | -7.7% (-10.4% to -4.8%)                                 |
| Canada                    | 16435 (11771 to 21451)       | 27394 (19406 to 35536)       | 54 (39 to 70)                                  | 54 (38 to 70)   | 0.8% (-7.1% to 9.1%)                                    |
| Greenland                 | 89 (65 to 114)               | 91 (64 to 116)               | 169 (121 to 213)                               | 139 (98 to 176) | -17.6% (-22% to -12.8%)                                 |
| United States of America  | 366838 (261078 to 473846)    | 515833 (364639 to 661820)    | 130 (93 to 169)                                | 120 (85 to 155) | -7.8% (-10.6% to -4.8%)                                 |
| Australasia               | 19732 (13765 to 25937)       | 33799 (23765 to 44013)       | 91 (63 to 120)                                 | 97 (68 to 127)  | 6.7% (0.8% to 13%)                                      |
| Australia                 | 16039 (11183 to 21253)       | 27954 (19462 to 36495)       | 88 (61 to 117)                                 | 95 (66 to 124)  | 7% (-0.2% to 14.6%)                                     |
| New Zealand               | 3693 (2583 to 4832)          | 5845 (4127 to 7620)          | 102 (71 to 134)                                | 109 (77 to 143) | 6.5% (0% to 13.5%)                                      |
| High-income Asia Pacific  | 171547 (120968 to 220202)    | 226816 (161070 to 292262)    | 87 (62 to 112)                                 | 83 (58 to 107)  | -5.3% (-7.9% to -2.6%)                                  |
| Brunei Darussalam         | 127 (90 to 165)              | 234 (164 to 302)             | 58 (42 to 74)                                  | 50 (35 to 65)   | -12.6% (-19.7% to -5.1%)                                |
| Japan                     | 141594 (100178 to 182978)    | 177770 (125301 to 229752)    | 94 (66 to 122)                                 | 93 (66 to 121)  | -0.8% (-3.5% to 1.9%)                                   |
| Republic of Korea         | 28128 (19849 to 36057)       | 44931 (31441 to 58697)       | 65 (46 to 83)                                  | 62 (43 to 81)   | -4.5% (-12.2% to 4.1%)                                  |

1  
2  
3  
4  
5  
6  
7  
8  
9  
10  
11  
12  
13  
14  
15  
16  
17  
18  
19  
20  
21  
22  
23  
24  
25  
26  
27  
28  
29  
30  
31  
32  
33  
34  
35  
36  
37  
38  
39  
40  
41  
42  
43  
44  
45  
46

| Location       | YLD                       |                           |                                                |                 |                                                         |
|----------------|---------------------------|---------------------------|------------------------------------------------|-----------------|---------------------------------------------------------|
|                | Numbers<br>(95% UI)       |                           | Age-standardized rates per 100,000<br>(95% UI) |                 | Percentage change of age-standardized rates<br>(95% UI) |
|                | (Year 1990)               | (Year 2019)               | (Year 1990)                                    | (Year 2019)     | (Year 1990–Year 2019)                                   |
| Singapore      | 1697 (1193 to 2200)       | 3881 (2727 to 5081)       | 53 (37 to 69)                                  | 53 (37 to 70)   | 0.4% (-8.2% to 9.1%)                                    |
| Western Europe | 279889 (197802 to 361524) | 362292 (259168 to 466837) | 62 (44 to 81)                                  | 63 (45 to 82)   | 1.4% (-2.3% to 5.2%)                                    |
| Andorra        | 38 (27 to 50)             | 76 (54 to 99)             | 63 (45 to 83)                                  | 67 (48 to 88)   | 6.5% (-2.1% to 15.3%)                                   |
| Austria        | 5901 (4157 to 7675)       | 7418 (5264 to 9570)       | 64 (45 to 85)                                  | 63 (44 to 81)   | -2.6% (-10.4% to 6.2%)                                  |
| Belgium        | 7661 (5439 to 9989)       | 10894 (7676 to 14182)     | 65 (46 to 85)                                  | 72 (51 to 95)   | 10.9% (1.9% to 20.4%)                                   |
| Cyprus         | 461 (331 to 602)          | 943 (661 to 1242)         | 57 (41 to 74)                                  | 59 (41 to 78)   | 3.9% (-4.9% to 13.6%)                                   |
| Denmark        | 3584 (2531 to 4695)       | 4168 (2926 to 5448)       | 58 (41 to 75)                                  | 58 (40 to 75)   | 0% (-9.2% to 10.4%)                                     |
| Finland        | 4795 (3379 to 6195)       | 6140 (4337 to 8023)       | 82 (57 to 106)                                 | 85 (59 to 112)  | 3.1% (-5% to 12.3%)                                     |
| France         | 44198 (31606 to 57539)    | 58574 (41243 to 76394)    | 66 (47 to 86)                                  | 67 (47 to 88)   | 0.9% (-7% to 9.7%)                                      |
| Germany        | 53226 (38070 to 70139)    | 65939 (46825 to 86203)    | 55 (39 to 73)                                  | 58 (40 to 76)   | 4.3% (-4.6% to 13.4%)                                   |
| Greece         | 7006 (4919 to 9093)       | 7380 (5230 to 9569)       | 58 (41 to 76)                                  | 55 (39 to 73)   | -5% (-13.1% to 3.3%)                                    |
| Iceland        | 152 (107 to 200)          | 247 (175 to 324)          | 58 (41 to 76)                                  | 60 (42 to 80)   | 4% (-4.8% to 13.7%)                                     |
| Ireland        | 1985 (1414 to 2614)       | 3395 (2405 to 4422)       | 54 (39 to 72)                                  | 59 (42 to 77)   | 8.3% (-0.6% to 17.8%)                                   |
| Israel         | 2599 (1868 to 3382)       | 6892 (4598 to 10405)      | 55 (39 to 71)                                  | 73 (48 to 111)  | 33.1% (8.1% to 83.4%)                                   |
| Italy          | 40412 (28984 to 52258)    | 44023 (31605 to 56655)    | 59 (42 to 76)                                  | 52 (37 to 68)   | -10.7% (-13.9% to -6.8%)                                |
| Luxembourg     | 295 (209 to 385)          | 495 (353 to 644)          | 65 (46 to 85)                                  | 64 (45 to 83)   | -2.4% (-10.8% to 5.8%)                                  |
| Malta          | 232 (164 to 306)          | 370 (261 to 483)          | 58 (41 to 76)                                  | 65 (46 to 86)   | 12.7% (3.7% to 23.3%)                                   |
| Monaco         | 47 (33 to 62)             | 67 (47 to 88)             | 116 (81 to 153)                                | 132 (91 to 177) | 13.9% (6.8% to 21.4%)                                   |

1  
2  
3  
4  
5  
6  
7  
8  
9  
10  
11  
12  
13  
14  
15  
16  
17  
18  
19  
20  
21  
22  
23  
24  
25  
26  
27  
28  
29  
30  
31  
32  
33  
34  
35  
36  
37  
38  
39  
40  
41  
42  
43  
44  
45  
46

| Location                                                | YLD                       |                           |                                                |                 |                                                         |
|---------------------------------------------------------|---------------------------|---------------------------|------------------------------------------------|-----------------|---------------------------------------------------------|
|                                                         | Numbers<br>(95% UI)       |                           | Age-standardized rates per 100,000<br>(95% UI) |                 | Percentage change of age-standardized rates<br>(95% UI) |
|                                                         | (Year 1990)               | (Year 2019)               | (Year 1990)                                    | (Year 2019)     | (Year 1990–Year 2019)                                   |
| Netherlands                                             | 8074 (5744 to 10507)      | 11974 (8526 to 15625)     | 47 (33 to 61)                                  | 52 (37 to 68)   | 10.1% (0.5% to 19.8%)                                   |
| Norway                                                  | 6642 (4671 to 8561)       | 9426 (6643 to 12304)      | 129 (91 to 169)                                | 134 (94 to 177) | 3.8% (0.3% to 7.8%)                                     |
| Portugal                                                | 6969 (4907 to 9277)       | 6283 (4459 to 8202)       | 62 (44 to 84)                                  | 43 (30 to 56)   | -31.5% (-39.4% to -24.1%)                               |
| San Marino                                              | 33 (23 to 44)             | 58 (40 to 76)             | 123 (87 to 163)                                | 137 (95 to 181) | 10.7% (3.9% to 18%)                                     |
| Spain                                                   | 23321 (16596 to 30399)    | 34473 (24458 to 44862)    | 53 (38 to 70)                                  | 57 (40 to 75)   | 6.1% (-4.5% to 17.5%)                                   |
| Sweden                                                  | 14031 (9879 to 18292)     | 18973 (13417 to 24808)    | 131 (92 to 172)                                | 139 (96 to 184) | 5.6% (-0.2% to 11.3%)                                   |
| Switzerland                                             | 6683 (4699 to 8775)       | 8610 (6048 to 11261)      | 80 (57 to 105)                                 | 74 (51 to 97)   | -8.2% (-15.9% to -0.1%)                                 |
| United Kingdom                                          | 41311 (29390 to 53200)    | 55158 (39439 to 71101)    | 63 (45 to 81)                                  | 65 (46 to 85)   | 4% (0.7% to 7.2%)                                       |
| <b>Southern Latin America</b>                           | 30510 (22019 to 39520)    | 43936 (31118 to 56649)    | 63 (46 to 82)                                  | 60 (42 to 78)   | -4.8% (-14.1% to 2.9%)                                  |
| Argentina                                               | 21112 (15060 to 28261)    | 29214 (20449 to 37642)    | 65 (47 to 87)                                  | 60 (42 to 78)   | -7.3% (-19.2% to 3.5%)                                  |
| Chile                                                   | 7238 (5210 to 9296)       | 12222 (8740 to 15961)     | 58 (42 to 74)                                  | 59 (42 to 76)   | 1.4% (-7.4% to 10.5%)                                   |
| Uruguay                                                 | 2159 (1561 to 2790)       | 2499 (1787 to 3231)       | 66 (48 to 85)                                  | 64 (46 to 83)   | -3.2% (-11.3% to 6.3%)                                  |
| <b>Central Europe, Eastern Europe, and Central Asia</b> | 444671 (316403 to 564756) | 407384 (290705 to 526194) | 100 (71 to 127)                                | 82 (58 to 106)  | -18% (-21.9% to -10.7%)                                 |
| <b>Eastern Europe</b>                                   | 271646 (192682 to 347314) | 219534 (156030 to 282875) | 108 (76 to 138)                                | 85 (60 to 109)  | -21.4% (-25.1% to -15.4%)                               |

1  
2  
3  
4  
5  
6  
7  
8  
9  
10  
11  
12  
13  
14  
15  
16  
17  
18  
19  
20  
21  
22  
23  
24  
25  
26  
27  
28  
29  
30  
31  
32  
33  
34  
35  
36  
37  
38  
39  
40  
41  
42  
43  
44  
45  
46

| Location               | YLD                       |                           |                                                |                 |                                                         |
|------------------------|---------------------------|---------------------------|------------------------------------------------|-----------------|---------------------------------------------------------|
|                        | Numbers<br>(95% UI)       |                           | Age-standardized rates per 100,000<br>(95% UI) |                 | Percentage change of age-standardized rates<br>(95% UI) |
|                        | (Year 1990)               | (Year 2019)               | (Year 1990)                                    | (Year 2019)     | (Year 1990–Year 2019)                                   |
| Belarus                | 10900 (7733 to 13970)     | 9342 (6561 to 12215)      | 95 (67 to 121)                                 | 78 (55 to 102)  | -17.1% (-23.2% to -11.3%)                               |
| Estonia                | 1886 (1327 to 2431)       | 1225 (867 to 1610)        | 107 (76 to 138)                                | 74 (52 to 97)   | -31.1% (-36.6% to -25.5%)                               |
| Latvia                 | 3483 (2489 to 4452)       | 1823 (1280 to 2382)       | 115 (82 to 147)                                | 75 (52 to 98)   | -35.2% (-40.3% to -29.8%)                               |
| Lithuania              | 4346 (3095 to 5557)       | 3002 (2125 to 3902)       | 107 (76 to 137)                                | 82 (57 to 107)  | -23.5% (-29.2% to -17.6%)                               |
| Republic of Moldova    | 4120 (2959 to 5252)       | 3227 (2279 to 4171)       | 90 (65 to 114)                                 | 71 (50 to 92)   | -21.1% (-27.6% to -14.2%)                               |
| Russian Federation     | 184998 (131132 to 235248) | 156702 (111813 to 202955) | 111 (78 to 141)                                | 87 (62 to 112)  | -21.5% (-25.9% to -15%)                                 |
| Ukraine                | 61912 (43941 to 79689)    | 44214 (31275 to 57074)    | 104 (74 to 133)                                | 82 (58 to 106)  | -21% (-27.4% to -13.3%)                                 |
| <b>Central Europe</b>  | 134251 (96558 to 170285)  | 132314 (94264 to 171655)  | 100 (72 to 127)                                | 92 (65 to 119)  | -8.4% (-13% to -2%)                                     |
| Albania                | 2910 (2092 to 3738)       | 3007 (2094 to 3962)       | 99 (71 to 127)                                 | 93 (65 to 123)  | -6.2% (-15.9% to 8.6%)                                  |
| Bosnia and Herzegovina | 4834 (3424 to 6442)       | 6377 (3687 to 12037)      | 101 (72 to 135)                                | 156 (90 to 302) | 54.5% (11.7% to 130.8%)                                 |
| Bulgaria               | 9803 (6941 to 12610)      | 7357 (5223 to 9532)       | 99 (70 to 127)                                 | 86 (61 to 112)  | -12.6% (-19% to -6.2%)                                  |
| Croatia                | 5550 (3949 to 7139)       | 5690 (4019 to 7402)       | 99 (70 to 128)                                 | 102 (73 to 134) | 3.4% (-5.4% to 16.5%)                                   |
| Czechia                | 12202 (8618 to 15787)     | 13522 (9535 to 17554)     | 105 (75 to 136)                                | 99 (70 to 130)  | -5.7% (-11.9% to 1.4%)                                  |
| Hungary                | 11949 (8547 to 15269)     | 10581 (7521 to 13774)     | 99 (70 to 127)                                 | 85 (60 to 112)  | -13.9% (-20.6% to -6.4%)                                |
| Montenegro             | 587 (418 to 757)          | 657 (462 to 856)          | 91 (64 to 117)                                 | 88 (62 to 115)  | -2.5% (-8.6% to 4.4%)                                   |
| North Macedonia        | 1697 (1189 to 2167)       | 2107 (1487 to 2725)       | 81 (57 to 104)                                 | 81 (57 to 105)  | -1.1% (-9.3% to 7.5%)                                   |
| Poland                 | 40801 (29267 to 51706)    | 43601 (30773 to 56420)    | 100 (71 to 126)                                | 89 (63 to 115)  | -11.1% (-15.6% to -6.8%)                                |

1  
2  
3  
4  
5  
6  
7  
8  
9  
10  
11  
12  
13  
14  
15  
16  
17  
18  
19  
20  
21  
22  
23  
24  
25  
26  
27  
28  
29  
30  
31  
32  
33  
34  
35  
36  
37  
38  
39  
40  
41  
42  
43  
44  
45  
46

| Location                           | YLD                       |                           |                                                |                 |                                                         |
|------------------------------------|---------------------------|---------------------------|------------------------------------------------|-----------------|---------------------------------------------------------|
|                                    | Numbers<br>(95% UI)       |                           | Age-standardized rates per 100,000<br>(95% UI) |                 | Percentage change of age-standardized rates<br>(95% UI) |
|                                    | (Year 1990)               | (Year 2019)               | (Year 1990)                                    | (Year 2019)     | (Year 1990–Year 2019)                                   |
| Romania                            | 26357 (18966 to 33675)    | 19666 (14015 to 25656)    | 104 (75 to 133)                                | 82 (58 to 107)  | -21.2% (-27.4% to -14.7%)                               |
| Serbia                             | 9405 (6815 to 12082)      | 10185 (7050 to 14487)     | 90 (65 to 115)                                 | 98 (67 to 141)  | 9.4% (-8.5% to 47%)                                     |
| Slovakia                           | 5560 (3928 to 7110)       | 6544 (4662 to 8499)       | 99 (70 to 127)                                 | 95 (67 to 123)  | -4.8% (-11.4% to 2%)                                    |
| Slovenia                           | 2596 (1853 to 3396)       | 3019 (2147 to 3976)       | 117 (83 to 153)                                | 109 (77 to 143) | -6.7% (-12.9% to -0.5%)                                 |
| <b>Central Asia</b>                | 38774 (28022 to 49649)    | 55536 (39430 to 73018)    | 64 (46 to 81)                                  | 58 (42 to 76)   | -8.1% (-16.7% to 8%)                                    |
| Armenia                            | 5198 (3146 to 8491)       | 2673 (1793 to 3841)       | 157 (95 to 255)                                | 76 (52 to 108)  | -51.6% (-60% to -40.6%)                                 |
| Azerbaijan                         | 3604 (2571 to 4580)       | 6274 (4363 to 8767)       | 54 (39 to 69)                                  | 54 (38 to 75)   | 0.7% (-14.3% to 25.7%)                                  |
| Georgia                            | 3591 (2566 to 4613)       | 3053 (2133 to 4063)       | 62 (44 to 79)                                  | 73 (50 to 98)   | 18.4% (2.9% to 47.1%)                                   |
| Kazakhstan                         | 10394 (7403 to 13230)     | 11569 (8175 to 14962)     | 66 (47 to 84)                                  | 60 (42 to 78)   | -9.5% (-17.4% to -1.5%)                                 |
| Kyrgyzstan                         | 2318 (1672 to 2968)       | 3234 (2302 to 4195)       | 61 (44 to 77)                                  | 52 (37 to 67)   | -14.5% (-22.7% to -5.2%)                                |
| Mongolia                           | 951 (688 to 1200)         | 2105 (1497 to 2698)       | 55 (40 to 70)                                  | 60 (43 to 77)   | 8.6% (-1.2% to 18.7%)                                   |
| Tajikistan                         | 2367 (1683 to 3005)       | 7748 (4353 to 15772)      | 58 (42 to 73)                                  | 88 (50 to 175)  | 51.2% (-5.1% to 195.3%)                                 |
| Turkmenistan                       | 1498 (1072 to 1913)       | 2455 (1756 to 3185)       | 50 (36 to 63)                                  | 48 (35 to 62)   | -2.9% (-13.2% to 10.6%)                                 |
| Uzbekistan                         | 8854 (6375 to 11451)      | 16425 (11580 to 21093)    | 53 (37 to 68)                                  | 49 (35 to 63)   | -6.8% (-15.5% to 2.3%)                                  |
| <b>Latin America and Caribbean</b> | 332236 (236429 to 446580) | 502465 (360265 to 641612) | 99 (71 to 129)                                 | 82 (59 to 105)  | -16.8% (-23.3% to -11.6%)                               |
| <b>Central Latin America</b>       | 152900 (104937 to 229866) | 200134 (142895 to 262800) | 110 (77 to 157)                                | 79 (56 to 103)  | -28.2% (-36.5% to -22.5%)                               |



| Location                           | YLD                     |                          |                                                |                 |                                                         |
|------------------------------------|-------------------------|--------------------------|------------------------------------------------|-----------------|---------------------------------------------------------|
|                                    | Numbers<br>(95% UI)     |                          | Age-standardized rates per 100,000<br>(95% UI) |                 | Percentage change of age-standardized rates<br>(95% UI) |
|                                    | (Year 1990)             | (Year 2019)              | (Year 1990)                                    | (Year 2019)     | (Year 1990–Year 2019)                                   |
| Colombia                           | 21868 (15273 to 29497)  | 30489 (20572 to 44447)   | 76 (54 to 100)                                 | 60 (40 to 87)   | -20.9% (-31.5% to -5.8%)                                |
| Costa Rica                         | 1189 (848 to 1554)      | 2299 (1621 to 3010)      | 46 (33 to 59)                                  | 45 (32 to 59)   | -1.7% (-9.7% to 6.7%)                                   |
| El Salvador                        | 14593 (4794 to 41290)   | 7025 (3524 to 16079)     | 280 (95 to 763)                                | 117 (58 to 272) | -58.1% (-65.7% to -38.1%)                               |
| Guatemala                          | 9339 (3905 to 23409)    | 10479 (6703 to 18661)    | 129 (58 to 318)                                | 69 (43 to 127)  | -46.5% (-61.2% to -19%)                                 |
| Honduras                           | 1644 (1189 to 2093)     | 4760 (3333 to 6327)      | 46 (33 to 58)                                  | 54 (38 to 72)   | 18.6% (2.3% to 42.6%)                                   |
| Mexico                             | 83476 (60063 to 105507) | 120381 (86536 to 154329) | 123 (89 to 155)                                | 94 (68 to 121)  | -23.5% (-26.3% to -20.8%)                               |
| Nicaragua                          | 10677 (3015 to 31127)   | 7105 (3061 to 17891)     | 279 (85 to 785)                                | 122 (51 to 309) | -56.3% (-62.6% to -38.9%)                               |
| Panama                             | 1175 (776 to 2105)      | 1936 (1346 to 2667)      | 54 (37 to 92)                                  | 46 (32 to 63)   | -15.1% (-33.7% to -0.8%)                                |
| Venezuela (Bolivarian Republic of) | 8941 (6413 to 11455)    | 15660 (11076 to 20541)   | 55 (40 to 70)                                  | 53 (37 to 69)   | -4.6% (-14.9% to 8%)                                    |
| <b>Andean Latin America</b>        | 17534 (11289 to 29299)  | 26820 (18760 to 38361)   | 52 (35 to 82)                                  | 43 (30 to 62)   | -17.2% (-29.5% to -6.2%)                                |
| Bolivia (Plurinational State of)   | 1861 (1329 to 2351)     | 3779 (2690 to 4811)      | 36 (26 to 45)                                  | 34 (24 to 44)   | -4.1% (-14.5% to 7.3%)                                  |
| Ecuador                            | 3868 (2730 to 5003)     | 7139 (5143 to 9248)      | 47 (33 to 60)                                  | 42 (30 to 54)   | -10.4% (-20.6% to 0.7%)                                 |
| Peru                               | 11805 (6784 to 23027)   | 15903 (10527 to 25226)   | 59 (36 to 108)                                 | 46 (31 to 73)   | -21.7% (-35.3% to -6.6%)                                |
| <b>Caribbean</b>                   | 14906 (10845 to 18906)  | 38262 (24729 to 57334)   | 47 (34 to 59)                                  | 78 (50 to 117)  | 66% (24.4% to 140%)                                     |
| Antigua and Barbuda                | 21 (15 to 27)           | 39 (28 to 51)            | 36 (26 to 47)                                  | 39 (28 to 50)   | 7% (-3.7% to 18.9%)                                     |

1  
2  
3  
4  
5  
6  
7  
8  
9  
10  
11  
12  
13  
14  
15  
16  
17  
18  
19  
20  
21  
22  
23  
24  
25  
26  
27  
28  
29  
30  
31  
32  
33  
34  
35  
36  
37  
38  
39  
40  
41  
42  
43  
44  
45  
46

| Location                         | YLD                       |                           |                                                |                 |                                                         |
|----------------------------------|---------------------------|---------------------------|------------------------------------------------|-----------------|---------------------------------------------------------|
|                                  | Numbers<br>(95% UI)       |                           | Age-standardized rates per 100,000<br>(95% UI) |                 | Percentage change of age-standardized rates<br>(95% UI) |
|                                  | (Year 1990)               | (Year 2019)               | (Year 1990)                                    | (Year 2019)     | (Year 1990–Year 2019)                                   |
| Bahamas                          | 84 (60 to 107)            | 158 (113 to 204)          | 35 (25 to 45)                                  | 38 (27 to 49)   | 7.3% (-4.3% to 19.8%)                                   |
| Barbados                         | 88 (64 to 112)            | 124 (89 to 159)           | 34 (25 to 43)                                  | 35 (25 to 45)   | 2.7% (-8.5% to 14.3%)                                   |
| Belize                           | 59 (42 to 77)             | 173 (126 to 226)          | 41 (30 to 53)                                  | 45 (33 to 58)   | 8.6% (-1.2% to 19.7%)                                   |
| Bermuda                          | 50 (36 to 65)             | 69 (49 to 89)             | 76 (54 to 98)                                  | 81 (58 to 105)  | 7% (-1.8% to 16.5%)                                     |
| Cuba                             | 5056 (3569 to 6436)       | 6504 (4662 to 8469)       | 46 (33 to 58)                                  | 45 (32 to 59)   | -2.1% (-10.9% to 8.4%)                                  |
| Dominica                         | 24 (17 to 32)             | 32 (23 to 42)             | 36 (26 to 48)                                  | 42 (30 to 54)   | 15.1% (-0.4% to 32.9%)                                  |
| Dominican Republic               | 2235 (1614 to 2834)       | 4755 (3410 to 6125)       | 38 (28 to 48)                                  | 44 (32 to 57)   | 15.7% (4.1% to 28.6%)                                   |
| Grenada                          | 37 (23 to 70)             | 48 (33 to 62)             | 49 (31 to 89)                                  | 42 (30 to 56)   | -13.7% (-40% to 12.3%)                                  |
| Guyana                           | 260 (189 to 331)          | 328 (235 to 416)          | 39 (28 to 49)                                  | 43 (30 to 54)   | 10.3% (-1.2% to 22.8%)                                  |
| Haiti                            | 1824 (1321 to 2337)       | 18498 (8950 to 34403)     | 35 (25 to 44)                                  | 158 (77 to 294) | 354.7% (143.5% to 723.4%)                               |
| Jamaica                          | 786 (568 to 1021)         | 1076 (769 to 1376)        | 38 (27 to 49)                                  | 36 (26 to 46)   | -5.2% (-16.3% to 5.6%)                                  |
| Puerto Rico                      | 3152 (2227 to 4050)       | 4044 (2883 to 5316)       | 87 (61 to 112)                                 | 88 (62 to 116)  | 1.7% (-7.9% to 14.7%)                                   |
| Saint Kitts and Nevis            | 25 (18 to 31)             | 50 (35 to 64)             | 68 (49 to 86)                                  | 74 (52 to 96)   | 9.5% (-1.6% to 21.3%)                                   |
| Saint Lucia                      | 42 (30 to 54)             | 78 (57 to 100)            | 37 (27 to 47)                                  | 39 (28 to 50)   | 6.4% (-4.5% to 18.9%)                                   |
| Saint Vincent and the Grenadines | 32 (23 to 40)             | 47 (33 to 60)             | 35 (25 to 44)                                  | 38 (27 to 48)   | 8.8% (-2.7% to 22.4%)                                   |
| Suriname                         | 160 (108 to 261)          | 249 (178 to 326)          | 45 (30 to 70)                                  | 41 (29 to 54)   | -8.7% (-31.4% to 7.7%)                                  |
| Trinidad and Tobago              | 390 (278 to 506)          | 606 (436 to 779)          | 35 (25 to 45)                                  | 38 (27 to 49)   | 8% (-4% to 21%)                                         |
| United States Virgin Islands     | 84 (61 to 106)            | 88 (63 to 113)            | 80 (58 to 101)                                 | 70 (50 to 90)   | -12.5% (-19.5% to -4.7%)                                |
| <b>Tropical Latin America</b>    | 146895 (104835 to 186002) | 237248 (169890 to 302343) | 111 (80 to 140)                                | 97 (69 to 124)  | -12.9% (-16.6% to -9%)                                  |
| Brazil                           | 145402 (103654 to 184192) | 234431 (167899 to 298702) | 113 (81 to 142)                                | 98 (70 to 126)  | -12.8% (-16.6% to -8.8%)                                |
| Paraguay                         | 1494 (1070 to 1924)       | 2818 (2022 to 3605)       | 46 (33 to 59)                                  | 42 (30 to 53)   | -9.7% (-19% to 0.3%)                                    |

| Location                               | YLD                         |                              |                                                |                |                                                         |
|----------------------------------------|-----------------------------|------------------------------|------------------------------------------------|----------------|---------------------------------------------------------|
|                                        | Numbers<br>(95% UI)         |                              | Age-standardized rates per 100,000<br>(95% UI) |                | Percentage change of age-standardized rates<br>(95% UI) |
|                                        | (Year 1990)                 | (Year 2019)                  | (Year 1990)                                    | (Year 2019)    | (Year 1990–Year 2019)                                   |
| Southeast Asia, East Asia, and Oceania | 1002681 (732643 to 1259197) | 1805371 (1289643 to 2309733) | 65 (48 to 82)                                  | 69 (50 to 89)  | 6.6% (0.1% to 12.2%)                                    |
| East Asia                              | 742342 (531641 to 940603)   | 1388823 (979243 to 1793841)  | 65 (46 to 82)                                  | 72 (51 to 94)  | 11.1% (5% to 16.9%)                                     |
| China                                  | 731470 (523591 to 926331)   | 1373726 (968118 to 1774815)  | 66 (47 to 84)                                  | 74 (52 to 96)  | 11.4% (5.2% to 17.3%)                                   |
| Democratic People's Republic of Korea  | 4753 (3395 to 6097)         | 7008 (5007 to 9073)          | 24 (17 to 30)                                  | 23 (16 to 29)  | -5.3% (-16.1% to 6.9%)                                  |
| Taiwan (Province of China)             | 6119 (4255 to 8025)         | 8089 (5746 to 10379)         | 31 (22 to 41)                                  | 25 (18 to 32)  | -19.9% (-28.7% to -10.2%)                               |
| Southeast Asia                         | 258828 (180465 to 372095)   | 412470 (297995 to 546543)    | 65 (46 to 89)                                  | 59 (43 to 77)  | -9.3% (-22.4% to -0.7%)                                 |
| Cambodia                               | 13370 (3463 to 42654)       | 10238 (5454 to 22190)        | 137 (41 to 421)                                | 67 (35 to 146) | -51.2% (-67.5% to -7.9%)                                |
| Indonesia                              | 138111 (102139 to 173454)   | 210217 (153290 to 266273)    | 89 (66 to 111)                                 | 79 (57 to 99)  | -11.5% (-17.9% to -6%)                                  |
| Lao People's Democratic Republic       | 1114 (814 to 1425)          | 2208 (1612 to 2785)          | 34 (25 to 43)                                  | 34 (25 to 43)  | -0.3% (-11.3% to 13%)                                   |
| Malaysia                               | 5366 (3824 to 6836)         | 11627 (8356 to 15152)        | 37 (26 to 47)                                  | 36 (26 to 47)  | -1% (-11.4% to 9.7%)                                    |
| Maldives                               | 44 (32 to 57)               | 164 (116 to 219)             | 29 (21 to 36)                                  | 32 (23 to 42)  | 12% (-3% to 28.5%)                                      |
| Mauritius                              | 622 (444 to 798)            | 1072 (778 to 1385)           | 60 (43 to 77)                                  | 69 (50 to 89)  | 16.5% (6.5% to 28.1%)                                   |
| Myanmar                                | 18809 (10422 to 43265)      | 33553 (21725 to 50386)       | 50 (29 to 108)                                 | 61 (40 to 90)  | 21.5% (-27.4% to 83.6%)                                 |
| Philippines                            | 26715 (16967 to 47094)      | 43970 (30346 to 63181)       | 51 (33 to 84)                                  | 43 (30 to 61)  | -16.1% (-31.3% to -5.4%)                                |
| Seychelles                             | 43 (31 to 54)               | 81 (58 to 104)               | 67 (49 to 85)                                  | 70 (50 to 89)  | 4.2% (-5.1% to 13.7%)                                   |

1  
2  
3  
4  
5  
6  
7  
8  
9  
10  
11  
12  
13  
14  
15  
16  
17  
18  
19  
20  
21  
22  
23  
24  
25  
26  
27  
28  
29  
30  
31  
32  
33  
34  
35  
36  
37  
38  
39  
40  
41  
42  
43  
44  
45  
46

| Location                         | YLD                    |                        |                                                |                 |                                                         |
|----------------------------------|------------------------|------------------------|------------------------------------------------|-----------------|---------------------------------------------------------|
|                                  | Numbers<br>(95% UI)    |                        | Age-standardized rates per 100,000<br>(95% UI) |                 | Percentage change of age-standardized rates<br>(95% UI) |
|                                  | (Year 1990)            | (Year 2019)            | (Year 1990)                                    | (Year 2019)     | (Year 1990–Year 2019)                                   |
| Sri Lanka                        | 10662 (6172 to 20907)  | 24070 (12260 to 51620) | 64 (39 to 120)                                 | 102 (51 to 222) | 58.3% (18.7% to 104.8%)                                 |
| Thailand                         | 23282 (16627 to 29397) | 31982 (23052 to 41443) | 44 (32 to 56)                                  | 36 (26 to 47)   | -18.5% (-27.3% to -8.7%)                                |
| Timor-Leste                      | 1261 (429 to 3464)     | 1479 (569 to 3897)     | 167 (60 to 449)                                | 143 (55 to 377) | -13.8% (-21% to -3.4%)                                  |
| Viet Nam                         | 19083 (14045 to 24179) | 41271 (29846 to 53245) | 35 (26 to 45)                                  | 39 (28 to 50)   | 10.7% (-0.9% to 22.5%)                                  |
| <b>Oceania</b>                   | 1511 (1114 to 1906)    | 4077 (2923 to 5215)    | 30 (22 to 37)                                  | 36 (26 to 46)   | 21.8% (9.6% to 35.9%)                                   |
| American Samoa                   | 24 (17 to 31)          | 37 (27 to 48)          | 64 (46 to 81)                                  | 70 (50 to 90)   | 9.8% (-1.8% to 25.5%)                                   |
| Cook Islands                     | 11 (8 to 15)           | 15 (10 to 19)          | 70 (50 to 91)                                  | 72 (50 to 93)   | 2.5% (-8.3% to 14.2%)                                   |
| Fiji                             | 172 (123 to 221)       | 261 (188 to 336)       | 26 (19 to 33)                                  | 28 (21 to 37)   | 9% (-2.8% to 23.3%)                                     |
| Guam                             | 79 (57 to 103)         | 119 (85 to 153)        | 65 (47 to 84)                                  | 66 (48 to 85)   | 1.8% (-6.7% to 10.4%)                                   |
| Kiribati                         | 13 (9 to 16)           | 24 (18 to 32)          | 20 (14 to 25)                                  | 22 (16 to 29)   | 13.4% (-3.8% to 34.3%)                                  |
| Marshall Islands                 | 9 (6 to 11)            | 15 (11 to 20)          | 28 (20 to 35)                                  | 28 (21 to 36)   | 2.3% (-8.9% to 13.9%)                                   |
| Micronesia (Federated States of) | 21 (15 to 27)          | 29 (21 to 37)          | 28 (20 to 35)                                  | 30 (22 to 39)   | 9.9% (-3.7% to 25%)                                     |
| Nauru                            | 4 (3 to 6)             | 5 (4 to 7)             | 53 (39 to 68)                                  | 58 (42 to 76)   | 9.8% (-1.2% to 21.3%)                                   |
| Niue                             | 1 (1 to 1)             | 1 (1 to 1)             | 53 (38 to 68)                                  | 62 (45 to 81)   | 17.5% (4.5% to 32%)                                     |
| Northern Mariana Islands         | 29 (21 to 38)          | 36 (26 to 47)          | 71 (51 to 92)                                  | 70 (51 to 91)   | -1.5% (-9.6% to 7.2%)                                   |
| Palau                            | 10 (7 to 13)           | 17 (12 to 22)          | 72 (51 to 93)                                  | 78 (56 to 101)  | 9% (-2.3% to 21.4%)                                     |
| Papua New Guinea                 | 882 (641 to 1113)      | 2956 (2106 to 3811)    | 28 (20 to 35)                                  | 36 (26 to 46)   | 29.8% (12.9% to 50.1%)                                  |
| Samoa                            | 37 (26 to 47)          | 79 (54 to 108)         | 29 (21 to 37)                                  | 42 (29 to 57)   | 44.1% (19% to 79.9%)                                    |
| Solomon Islands                  | 75 (54 to 99)          | 175 (126 to 225)       | 30 (22 to 39)                                  | 32 (23 to 41)   | 7.7% (-5.6% to 21.6%)                                   |
| Tokelau                          | 1 (1 to 1)             | 1 (1 to 1)             | 53 (38 to 67)                                  | 60 (43 to 77)   | 13.5% (2% to 25.3%)                                     |
| Tonga                            | 20 (14 to 26)          | 25 (18 to 32)          | 27 (19 to 35)                                  | 27 (20 to 36)   | 1.7% (-11.3% to 16.3%)                                  |

1  
2  
3  
4  
5  
6  
7  
8  
9  
10  
11  
12  
13  
14  
15  
16  
17  
18  
19  
20  
21  
22  
23  
24  
25  
26  
27  
28  
29  
30  
31  
32  
33  
34  
35  
36  
37  
38  
39  
40  
41  
42  
43  
44  
45  
46

| Location                     | YLD                       |                            |                                                |                  |                                                         |
|------------------------------|---------------------------|----------------------------|------------------------------------------------|------------------|---------------------------------------------------------|
|                              | Numbers<br>(95% UI)       |                            | Age-standardized rates per 100,000<br>(95% UI) |                  | Percentage change of age-standardized rates<br>(95% UI) |
|                              | (Year 1990)               | (Year 2019)                | (Year 1990)                                    | (Year 2019)      | (Year 1990–Year 2019)                                   |
| Tuvalu                       | 4 (3 to 5)                | 6 (5 to 8)                 | 50 (36 to 63)                                  | 56 (41 to 72)    | 13.4% (1.5% to 27%)                                     |
| Vanuatu                      | 34 (24 to 46)             | 84 (59 to 112)             | 29 (20 to 38)                                  | 33 (24 to 44)    | 15.3% (0.2% to 31.9%)                                   |
| North Africa and Middle East | 304143 (139079 to 722558) | 564189 (289631 to 1229092) | 97 (48 to 219)                                 | 92 (48 to 199)   | -5.4% (-27.6% to 12.3%)                                 |
| North Africa and Middle East | 304143 (139079 to 722558) | 564189 (289631 to 1229092) | 97 (48 to 219)                                 | 92 (48 to 199)   | -5.4% (-27.6% to 12.3%)                                 |
| Afghanistan                  | 76762 (9561 to 311279)    | 98889 (26400 to 287537)    | 694 (91 to 2785)                               | 342 (87 to 1016) | -50.7% (-67.5% to 33%)                                  |
| Algeria                      | 8738 (6214 to 11266)      | 21542 (14186 to 32871)     | 45 (32 to 57)                                  | 50 (33 to 76)    | 12.2% (-11.6% to 62.6%)                                 |
| Bahrain                      | 191 (136 to 251)          | 716 (501 to 939)           | 40 (29 to 52)                                  | 39 (28 to 51)    | -2.1% (-13.7% to 11.7%)                                 |
| Egypt                        | 14451 (10269 to 18383)    | 28971 (20531 to 37521)     | 31 (22 to 39)                                  | 31 (22 to 40)    | 0.7% (-11.7% to 16.9%)                                  |
| Iran (Islamic Republic of)   | 58541 (29148 to 128645)   | 58925 (36923 to 97182)     | 122 (63 to 265)                                | 63 (40 to 102)   | -48.3% (-62.5% to -29.6%)                               |
| Iraq                         | 59709 (18003 to 169919)   | 106419 (35020 to 295453)   | 370 (113 to 1039)                              | 265 (90 to 729)  | -28.6% (-37.1% to -18.4%)                               |
| Jordan                       | 973 (690 to 1251)         | 3679 (2567 to 4814)        | 36 (25 to 45)                                  | 34 (24 to 45)    | -3.2% (-14.6% to 11.5%)                                 |
| Kuwait                       | 810 (547 to 1160)         | 2655 (1727 to 4220)        | 50 (34 to 68)                                  | 52 (34 to 80)    | 4.4% (-10.2% to 21%)                                    |
| Lebanon                      | 10077 (2378 to 32728)     | 7227 (2416 to 20570)       | 322 (78 to 1057)                               | 135 (45 to 386)  | -58.1% (-63.8% to -41.5%)                               |
| Libya                        | 2072 (1260 to 3768)       | 7366 (3820 to 15730)       | 60 (39 to 98)                                  | 100 (52 to 215)  | 67.9% (21.6% to 123.9%)                                 |
| Morocco                      | 10116 (7230 to 13770)     | 15820 (11427 to 20411)     | 47 (34 to 63)                                  | 43 (31 to 55)    | -9.1% (-21.4% to 2.7%)                                  |

1  
2

| Location             | YLD                       |                             |                                                |                   |                                                         |
|----------------------|---------------------------|-----------------------------|------------------------------------------------|-------------------|---------------------------------------------------------|
|                      | Numbers<br>(95% UI)       |                             | Age-standardized rates per 100,000<br>(95% UI) |                   | Percentage change of age-standardized rates<br>(95% UI) |
|                      | (Year 1990)               | (Year 2019)                 | (Year 1990)                                    | (Year 2019)       | (Year 1990–Year 2019)                                   |
| Oman                 | 739 (530 to 954)          | 2116 (1481 to 2770)         | 48 (35 to 62)                                  | 44 (31 to 58)     | -7.8% (-17.9% to 4.1%)                                  |
| Palestine            | 5353 (1742 to 14840)      | 13321 (4255 to 37063)       | 283 (97 to 746)                                | 309 (100 to 843)  | 9.3% (-5.8% to 17.9%)                                   |
| Qatar                | 255 (183 to 323)          | 1525 (1072 to 2024)         | 57 (41 to 71)                                  | 47 (33 to 61)     | -17.5% (-26.8% to -8.3%)                                |
| Saudi Arabia         | 8009 (5687 to 10303)      | 28027 (19946 to 36763)      | 66 (48 to 85)                                  | 71 (50 to 92)     | 6.2% (-3.8% to 16.6%)                                   |
| Sudan                | 12460 (8534 to 19490)     | 31938 (20436 to 55444)      | 79 (56 to 116)                                 | 96 (63 to 164)    | 22.2% (5.5% to 42.6%)                                   |
| Syrian Arab Republic | 6334 (2931 to 15535)      | 56665 (16102 to 159728)     | 59 (31 to 139)                                 | 403 (113 to 1150) | 579.2% (218.2% to 1263.6%)                              |
| Tunisia              | 2730 (1975 to 3497)       | 4717 (3406 to 6139)         | 39 (28 to 50)                                  | 37 (26 to 48)     | -5.7% (-16% to 5.6%)                                    |
| Turkey               | 18251 (13258 to 23147)    | 40162 (27330 to 56767)      | 35 (25 to 45)                                  | 44 (30 to 62)     | 24.2% (3.7% to 55.5%)                                   |
| United Arab Emirates | 880 (633 to 1129)         | 5464 (3826 to 7080)         | 48 (35 to 61)                                  | 43 (31 to 55)     | -11.1% (-21.3% to -1.1%)                                |
| Yemen                | 6487 (3619 to 13350)      | 27471 (12186 to 66369)      | 59 (36 to 109)                                 | 101 (46 to 238)   | 70.7% (18.8% to 131.1%)                                 |
| South Asia           | 494741 (363959 to 612135) | 1076209 (779951 to 1354932) | 56 (42 to 70)                                  | 63 (46 to 79)     | 11.9% (7.6% to 17%)                                     |
| South Asia           | 494741 (363959 to 612135) | 1076209 (779951 to 1354932) | 56 (42 to 70)                                  | 63 (46 to 79)     | 11.9% (7.6% to 17%)                                     |
| Bangladesh           | 32876 (23818 to 42290)    | 77231 (55316 to 100459)     | 40 (29 to 51)                                  | 50 (36 to 64)     | 24% (11% to 38.2%)                                      |
| Bhutan               | 201 (144 to 251)          | 399 (292 to 506)            | 45 (32 to 56)                                  | 55 (40 to 69)     | 22.8% (10.6% to 37.1%)                                  |

39  
40  
41  
42  
43  
44  
45  
46

| Location                    | YLD                       |                            |                                                |                |                                                         |
|-----------------------------|---------------------------|----------------------------|------------------------------------------------|----------------|---------------------------------------------------------|
|                             | Numbers<br>(95% UI)       |                            | Age-standardized rates per 100,000<br>(95% UI) |                | Percentage change of age-standardized rates<br>(95% UI) |
|                             | (Year 1990)               | (Year 2019)                | (Year 1990)                                    | (Year 2019)    | (Year 1990–Year 2019)                                   |
| India                       | 425838 (312874 to 527008) | 887447 (644356 to 1112943) | 61 (45 to 75)                                  | 66 (48 to 82)  | 8% (4.1% to 11.6%)                                      |
| Nepal                       | 6953 (5034 to 8814)       | 18091 (12597 to 24724)     | 47 (34 to 58)                                  | 64 (45 to 87)  | 37.6% (17.1% to 70.8%)                                  |
| Pakistan                    | 28874 (21063 to 36036)    | 93040 (65998 to 127413)    | 35 (26 to 44)                                  | 51 (36 to 67)  | 42.7% (25.2% to 72.6%)                                  |
| Sub-Saharan Africa          | 285149 (188516 to 479224) | 635020 (432096 to 1003966) | 75 (52 to 119)                                 | 77 (54 to 119) | 3.6% (-1% to 8%)                                        |
| Southern Sub-Saharan Africa | 31705 (22957 to 40483)    | 41857 (29959 to 52588)     | 75 (54 to 95)                                  | 56 (40 to 71)  | -25.2% (-30.8% to -21.5%)                               |
| Botswana                    | 561 (412 to 719)          | 1274 (907 to 1617)         | 56 (41 to 71)                                  | 57 (41 to 72)  | 1.6% (-7.7% to 11%)                                     |
| Eswatini                    | 321 (232 to 406)          | 514 (364 to 646)           | 57 (41 to 71)                                  | 52 (37 to 65)  | -9% (-17.2% to -1%)                                     |
| Lesotho                     | 788 (562 to 993)          | 984 (707 to 1254)          | 55 (39 to 68)                                  | 50 (36 to 63)  | -8.8% (-18.1% to 1.3%)                                  |
| Namibia                     | 1241 (695 to 2583)        | 1421 (1015 to 1872)        | 104 (62 to 200)                                | 68 (49 to 91)  | -34.3% (-58.3% to -9.7%)                                |
| South Africa                | 24873 (17886 to 31878)    | 31489 (22407 to 39715)     | 81 (58 to 103)                                 | 57 (41 to 71)  | -29.5% (-35.4% to -25.5%)                               |
| Zimbabwe                    | 3920 (2824 to 5003)       | 6175 (4495 to 7836)        | 54 (38 to 68)                                  | 51 (37 to 64)  | -5.5% (-13.4% to 4%)                                    |
| Western Sub-Saharan Africa  | 92325 (67628 to 115005)   | 248091 (181695 to 324936)  | 67 (49 to 84)                                  | 76 (55 to 98)  | 12.7% (7.9% to 22.6%)                                   |
| Benin                       | 2223 (1613 to 2804)       | 6408 (4564 to 8217)        | 70 (51 to 88)                                  | 75 (54 to 95)  | 6.9% (-1.8% to 15.3%)                                   |
| Burkina Faso                | 3910 (2830 to 4923)       | 11871 (8646 to 14957)      | 60 (44 to 76)                                  | 77 (56 to 96)  | 27.4% (17.5% to 38.4%)                                  |
| Cabo Verde                  | 172 (123 to 217)          | 381 (274 to 483)           | 66 (48 to 83)                                  | 72 (52 to 92)  | 9.3% (-0.1% to 18.9%)                                   |

1  
2  
3  
4  
5  
6  
7  
8  
9  
10  
11  
12  
13  
14  
15  
16  
17  
18  
19  
20  
21  
22  
23  
24  
25  
26  
27  
28  
29  
30  
31  
32  
33  
34  
35  
36  
37  
38  
39  
40  
41  
42  
43  
44  
45  
46

| Location                          | YLD                      |                           |                                                |                 |                                                         |
|-----------------------------------|--------------------------|---------------------------|------------------------------------------------|-----------------|---------------------------------------------------------|
|                                   | Numbers<br>(95% UI)      |                           | Age-standardized rates per 100,000<br>(95% UI) |                 | Percentage change of age-standardized rates<br>(95% UI) |
|                                   | (Year 1990)              | (Year 2019)               | (Year 1990)                                    | (Year 2019)     | (Year 1990–Year 2019)                                   |
| Cameroon                          | 5866 (4309 to 7377)      | 17898 (12839 to 23285)    | 82 (60 to 103)                                 | 83 (60 to 106)  | 1.3% (-7.4% to 11.4%)                                   |
| Chad                              | 4323 (2513 to 8625)      | 8833 (6084 to 13034)      | 95 (59 to 174)                                 | 87 (61 to 127)  | -8.5% (-28.9% to 13.2%)                                 |
| Côte d'Ivoire                     | 5561 (3972 to 6998)      | 14737 (10567 to 18642)    | 68 (49 to 84)                                  | 75 (54 to 94)   | 10.8% (2% to 21%)                                       |
| Gambia                            | 487 (342 to 711)         | 1107 (798 to 1405)        | 71 (51 to 97)                                  | 68 (50 to 86)   | -4.5% (-20% to 7.7%)                                    |
| Ghana                             | 7883 (5582 to 9921)      | 22174 (15891 to 28290)    | 74 (53 to 93)                                  | 86 (62 to 109)  | 16.2% (7.7% to 24.7%)                                   |
| Guinea                            | 3086 (2202 to 3879)      | 6731 (4870 to 8518)       | 68 (49 to 85)                                  | 76 (56 to 96)   | 11.3% (2.1% to 21.5%)                                   |
| Guinea-Bissau                     | 541 (393 to 678)         | 1184 (852 to 1523)        | 76 (55 to 95)                                  | 83 (61 to 106)  | 9.6% (-0.1% to 23.1%)                                   |
| Liberia                           | 1189 (810 to 1884)       | 3991 (2373 to 7994)       | 77 (54 to 113)                                 | 105 (63 to 203) | 37.1% (7.1% to 82%)                                     |
| Mali                              | 4043 (2894 to 5063)      | 13001 (8825 to 20343)     | 66 (47 to 83)                                  | 88 (62 to 138)  | 33.8% (10.1% to 88.8%)                                  |
| Mauritania                        | 1351 (979 to 1701)       | 2685 (1935 to 3434)       | 92 (67 to 116)                                 | 89 (64 to 114)  | -2.8% (-9.4% to 4.2%)                                   |
| Niger                             | 3532 (2571 to 4467)      | 10196 (7356 to 12935)     | 68 (50 to 85)                                  | 73 (53 to 92)   | 6.6% (-1.7% to 16%)                                     |
| Nigeria                           | 41034 (29577 to 51422)   | 107235 (77703 to 141553)  | 62 (45 to 78)                                  | 69 (50 to 89)   | 11.4% (5% to 25.7%)                                     |
| Sao Tome and Principe             | 67 (48 to 85)            | 145 (103 to 185)          | 78 (56 to 98)                                  | 88 (63 to 112)  | 13.4% (4.8% to 21.6%)                                   |
| Senegal                           | 3421 (2430 to 4303)      | 8308 (6023 to 10410)      | 66 (47 to 84)                                  | 74 (54 to 92)   | 10.9% (3.2% to 21.2%)                                   |
| Sierra Leone                      | 1766 (1285 to 2206)      | 6286 (4171 to 10476)      | 65 (48 to 81)                                  | 101 (67 to 167) | 55.4% (19% to 138.8%)                                   |
| Togo                              | 1867 (1351 to 2362)      | 4915 (3518 to 6243)       | 77 (55 to 97)                                  | 79 (57 to 99)   | 2.5% (-4.9% to 10.6%)                                   |
| <b>Eastern Sub-Saharan Africa</b> | 137377 (79383 to 292137) | 279864 (176063 to 502643) | 89 (55 to 175)                                 | 90 (57 to 161)  | 1.1% (-10.4% to 8.8%)                                   |



| Location                    | YLD                    |                         |                                                |                  |                                                         |
|-----------------------------|------------------------|-------------------------|------------------------------------------------|------------------|---------------------------------------------------------|
|                             | Numbers<br>(95% UI)    |                         | Age-standardized rates per 100,000<br>(95% UI) |                  | Percentage change of age-standardized rates<br>(95% UI) |
|                             | (Year 1990)            | (Year 2019)             | (Year 1990)                                    | (Year 2019)      | (Year 1990–Year 2019)                                   |
| Burundi                     | 1295 (929 to 1654)     | 29623 (9258 to 84723)   | 31 (23 to 39)                                  | 306 (98 to 849)  | 883.9% (217.8% to 2582.5%)                              |
| Comoros                     | 334 (246 to 421)       | 678 (490 to 855)        | 99 (72 to 125)                                 | 106 (77 to 133)  | 7.2% (-0.2% to 14.6%)                                   |
| Djibouti                    | 297 (215 to 375)       | 952 (678 to 1230)       | 88 (64 to 111)                                 | 91 (65 to 117)   | 3.2% (-6.4% to 15.6%)                                   |
| Eritrea                     | 12654 (3458 to 39163)  | 9577 (4639 to 23553)    | 444 (132 to 1272)                              | 183 (90 to 458)  | -58.8% (-68.2% to -30.2%)                               |
| Ethiopia                    | 34524 (16633 to 80823) | 56868 (30373 to 121962) | 75 (40 to 161)                                 | 72 (39 to 155)   | -4.2% (-17.5% to 20%)                                   |
| Kenya                       | 5256 (3826 to 6541)    | 15246 (11075 to 20379)  | 33 (24 to 41)                                  | 36 (27 to 47)    | 11.1% (2% to 31.2%)                                     |
| Madagascar                  | 7170 (5120 to 8972)    | 17061 (12159 to 21638)  | 83 (59 to 103)                                 | 82 (59 to 104)   | -0.5% (-8.3% to 8.6%)                                   |
| Malawi                      | 4380 (3111 to 5585)    | 9618 (6811 to 12315)    | 62 (45 to 79)                                  | 70 (50 to 87)    | 11.8% (3.4% to 21%)                                     |
| Mozambique                  | 21792 (9745 to 57111)  | 20719 (14681 to 29422)  | 196 (97 to 475)                                | 102 (72 to 150)  | -48% (-69.8% to -14.4%)                                 |
| Rwanda                      | 4886 (3490 to 6178)    | 25354 (11173 to 61782)  | 93 (67 to 117)                                 | 242 (109 to 579) | 159.4% (28.5% to 491.7%)                                |
| Somalia                     | 5141 (2845 to 14541)   | 16214 (10017 to 30965)  | 91 (54 to 224)                                 | 106 (67 to 192)  | 16.4% (-38.5% to 74.2%)                                 |
| South Sudan                 | 5006 (3293 to 8245)    | 9635 (5876 to 18305)    | 111 (77 to 173)                                | 136 (87 to 248)  | 22.8% (4.4% to 47%)                                     |
| Uganda                      | 18110 (8333 to 46907)  | 26128 (18352 to 37337)  | 125 (62 to 297)                                | 93 (65 to 134)   | -25.7% (-56.4% to 17.9%)                                |
| United Republic of Tanzania | 13056 (9286 to 16460)  | 32929 (23333 to 41503)  | 70 (51 to 88)                                  | 78 (56 to 99)    | 11.5% (3.6% to 20.7%)                                   |

1  
2  
3  
4  
5  
6  
7  
8  
9  
10  
11  
12  
13  
14  
15  
16  
17  
18  
19  
20  
21  
22  
23  
24  
25  
26  
27  
28  
29  
30  
31  
32  
33  
34  
35  
36  
37  
38  
39  
40  
41  
42  
43  
44  
45  
46

| Location                         | YLD                    |                         |                                                |                |                                                         |
|----------------------------------|------------------------|-------------------------|------------------------------------------------|----------------|---------------------------------------------------------|
|                                  | Numbers<br>(95% UI)    |                         | Age-standardized rates per 100,000<br>(95% UI) |                | Percentage change of age-standardized rates<br>(95% UI) |
|                                  | (Year 1990)            | (Year 2019)             | (Year 1990)                                    | (Year 2019)    | (Year 1990–Year 2019)                                   |
| Zambia                           | 3375 (2402 to 4242)    | 9038 (6509 to 11379)    | 61 (44 to 75)                                  | 66 (48 to 83)  | 9.1% (0.3% to 18.6%)                                    |
| Central Sub-Saharan Africa       | 23742 (12722 to 50625) | 65208 (33786 to 145484) | 50 (29 to 97)                                  | 62 (33 to 135) | 25.3% (8.7% to 40.1%)                                   |
| Angola                           | 14892 (5002 to 40955)  | 18968 (8592 to 46506)   | 150 (55 to 393)                                | 89 (40 to 218) | -40.7% (-48.1% to -25.2%)                               |
| Central African Republic         | 469 (339 to 604)       | 4095 (1737 to 10241)    | 22 (16 to 28)                                  | 79 (36 to 189) | 263.5% (71.3% to 729%)                                  |
| Congo                            | 460 (331 to 594)       | 3607 (1642 to 8799)     | 24 (18 to 31)                                  | 75 (35 to 177) | 208.6% (54.6% to 598.3%)                                |
| Democratic Republic of the Congo | 7603 (5389 to 9605)    | 37780 (20750 to 78035)  | 27 (19 to 33)                                  | 53 (30 to 104) | 99.1% (25.4% to 273.4%)                                 |
| Equatorial Guinea                | 80 (57 to 100)         | 293 (209 to 379)        | 24 (18 to 31)                                  | 26 (19 to 34)  | 7.6% (-5.1% to 22.1%)                                   |
| Gabon                            | 237 (173 to 302)       | 465 (335 to 599)        | 30 (22 to 38)                                  | 30 (22 to 38)  | -0.7% (-11.6% to 11.4%)                                 |

Abbreviations: YLDs, years lived with disability; UI, uncertainty interval

eTable 14. Incidence for 1990 and 2019 and percentage changes of age-standardized rates by location and cause for traumatic brain injury, 1990–2019

| Location    | Cause                                           | Age-standardized rates per 100,000 | Age-standardized rates per | Percentage change of age-standardized rates (95% UI) (1990–2019) |
|-------------|-------------------------------------------------|------------------------------------|----------------------------|------------------------------------------------------------------|
| Afghanistan | Adverse effects of medical treatment            | 0 (0 to 0)                         | 0 (0 to 0)                 | 0% (0% to 0%)                                                    |
| Afghanistan | Conflict and terrorism                          | 81 (31 to 192)                     | 356 (134 to 798)           | NA                                                               |
| Afghanistan | Cyclist road injuries                           | 13 (8 to 18)                       | 11 (8 to 16)               | -11% (-19% to -2.3%)                                             |
| Afghanistan | Drowning                                        | 0 (0 to 0)                         | 0 (0 to 0)                 | -21.3% (0% to -14.7%)                                            |
| Afghanistan | Environmental heat and cold exposure            | 2 (2 to 3)                         | 2 (1 to 3)                 | -1% (-5.5% to 5%)                                                |
| Afghanistan | Executions and police conflict                  | 0 (0 to 0)                         | 2 (1 to 3)                 | NA                                                               |
| Afghanistan | Exposure to forces of nature                    | 0 (0 to 0)                         | 2 (1 to 3)                 | NA                                                               |
| Afghanistan | Falls                                           | 44 (34 to 59)                      | 55 (42 to 72)              | 24.2% (19.4% to 28.9%)                                           |
| Afghanistan | Fire, heat, and hot substances                  | 0 (0 to 1)                         | 0 (0 to 1)                 | -7.4% (-14.7% to 1.7%)                                           |
| Afghanistan | Foreign body in eyes                            | 0 (0 to 0)                         | 0 (0 to 0)                 | 1% (0% to 2.7%)                                                  |
| Afghanistan | Foreign body in other body part                 | 1 (1 to 3)                         | 1 (1 to 3)                 | -1.3% (-5.7% to 4.1%)                                            |
| Afghanistan | Motor vehicle road injuries                     | 28 (22 to 37)                      | 23 (17 to 30)              | -20.2% (-27.4% to -12.5%)                                        |
| Afghanistan | Motorcyclist road injuries                      | 9 (7 to 12)                        | 8 (6 to 11)                | -9.2% (-18.5% to 0.1%)                                           |
| Afghanistan | Non-venomous animal contact                     | 6 (3 to 10)                        | 6 (3 to 10)                | -3.1% (-8.9% to 2.6%)                                            |
| Afghanistan | Other exposure to mechanical forces             | 27 (17 to 42)                      | 26 (16 to 41)              | -4.6% (-10.1% to 1.1%)                                           |
| Afghanistan | Other road injuries                             | 1 (1 to 2)                         | 1 (1 to 2)                 | -5.8% (-16.3% to 5.4%)                                           |
| Afghanistan | Other transport injuries                        | 5 (3 to 6)                         | 5 (4 to 6)                 | 6.1% (0.9% to 11.8%)                                             |
| Afghanistan | Other unintentional injuries                    | 26 (18 to 42)                      | 21 (14 to 32)              | -22.2% (-26.4% to -17.1%)                                        |
| Afghanistan | Pedestrian road injuries                        | 22 (16 to 28)                      | 18 (13 to 23)              | -18.6% (-25.5% to -11.9%)                                        |
| Afghanistan | Physical violence by firearm                    | 0 (0 to 0)                         | 0 (0 to 0)                 | 45% (20.6% to 75.7%)                                             |
| Afghanistan | Physical violence by other means                | 27 (19 to 37)                      | 27 (19 to 38)              | 1.8% (-5.7% to 9.1%)                                             |
| Afghanistan | Physical violence by sharp object               | 2 (2 to 4)                         | 2 (1 to 3)                 | -19.8% (-28% to -11.2%)                                          |
| Afghanistan | Poisoning by carbon monoxide                    | 0 (0 to 0)                         | 0 (0 to 0)                 | 30.9% (18.2% to 45.6%)                                           |
| Afghanistan | Poisoning by other means                        | 0 (0 to 0)                         | 0 (0 to 0)                 | -16.5% (-24.2% to -8.8%)                                         |
| Afghanistan | Pulmonary aspiration and foreign body in airway | 0 (0 to 1)                         | 0 (0 to 1)                 | -22.3% (-31.1% to -13.1%)                                        |
| Afghanistan | Self-harm by firearm                            | 0 (0 to 0)                         | 0 (0 to 0)                 | 14.6% (3.2% to 27.3%)                                            |
| Afghanistan | Self-harm by other specified means              | 1 (1 to 2)                         | 1 (1 to 1)                 | -10.7% (-15.7% to -5.6%)                                         |
| Afghanistan | Unintentional firearm injuries                  | 1 (1 to 2)                         | 1 (1 to 2)                 | -2.2% (-10.8% to 7.5%)                                           |
| Afghanistan | Venomous animal contact                         | 3 (1 to 7)                         | 3 (1 to 7)                 | -1.3% (-8.1% to 6.5%)                                            |
| Albania     | Adverse effects of medical treatment            | 0 (0 to 0)                         | 0 (0 to 0)                 | 0% (0% to 0%)                                                    |
| Albania     | Conflict and terrorism                          | 0 (0 to 0)                         | 0 (0 to 0)                 | NA                                                               |
| Albania     | Cyclist road injuries                           | 55 (39 to 72)                      | 60 (43 to 79)              | 9.3% (0.8% to 18.9%)                                             |
| Albania     | Drowning                                        | 0 (0 to 0)                         | 0 (0 to 1)                 | 89.2% (66.9% to 115%)                                            |
| Albania     | Environmental heat and cold exposure            | 2 (1 to 2)                         | 2 (1 to 2)                 | 2.9% (-1.2% to 7.4%)                                             |
| Albania     | Executions and police conflict                  | 0 (0 to 0)                         | 0 (0 to 0)                 | NA                                                               |
| Albania     | Exposure to forces of nature                    | 0 (0 to 0)                         | 0 (0 to 0)                 | NA                                                               |
| Albania     | Falls                                           | 130 (97 to 175)                    | 202 (153 to 271)           | 55.6% (49.5% to 61.7%)                                           |
| Albania     | Fire, heat, and hot substances                  | 3 (2 to 6)                         | 3 (2 to 6)                 | 2.6% (-3% to 7.8%)                                               |
| Albania     | Foreign body in eyes                            | 0 (0 to 0)                         | 0 (0 to 0)                 | -0.2% (-1% to 0.5%)                                              |

|    |         |                                                 |                  |                  |                           |
|----|---------|-------------------------------------------------|------------------|------------------|---------------------------|
| 1  |         |                                                 |                  |                  |                           |
| 2  | Albania | Foreign body in other body part                 | 3 (1 to 5)       | 2 (1 to 5)       | -0.9% (-7.1% to 4.6%)     |
| 3  | Albania | Motor vehicle road injuries                     | 78 (61 to 100)   | 84 (64 to 107)   | 7.6% (-1.3% to 16.7%)     |
| 4  | Albania | Motorcyclist road injuries                      | 11 (8 to 14)     | 15 (11 to 21)    | 45.8% (29.2% to 65.2%)    |
| 5  | Albania | Non-venomous animal contact                     | 7 (4 to 13)      | 6 (3 to 10)      | -19.6% (-24.2% to -14.3%) |
| 6  | Albania | Other exposure to mechanical forces             | 258 (164 to 402) | 172 (110 to 267) | -33.2% (-38.5% to -26.5%) |
| 7  | Albania | Other road injuries                             | 1 (1 to 2)       | 2 (1 to 3)       | 6.2% (-3.5% to 17.7%)     |
| 8  | Albania | Other transport injuries                        | 8 (6 to 10)      | 7 (5 to 9)       | -14.5% (-20.5% to -9.7%)  |
| 9  | Albania | Other unintentional injuries                    | 46 (30 to 73)    | 31 (19 to 50)    | -33.6% (-40.5% to -28.1%) |
| 10 | Albania | Pedestrian road injuries                        | 40 (31 to 51)    | 39 (29 to 49)    | -3.7% (-12.2% to 5.4%)    |
| 11 | Albania | Physical violence by firearm                    | 1 (1 to 2)       | 1 (0 to 1)       | -43.4% (-54.1% to -30.4%) |
| 12 | Albania | Physical violence by other means                | 49 (35 to 69)    | 25 (17 to 35)    | -49.4% (-56% to -42.9%)   |
| 13 | Albania | Physical violence by sharp object               | 4 (3 to 7)       | 2 (1 to 3)       | -61% (-69.1% to -52.6%)   |
| 14 | Albania | Poisoning by carbon monoxide                    | 0 (0 to 0)       | 0 (0 to 0)       | 41% (30.2% to 55.6%)      |
| 15 | Albania | Poisoning by other means                        | 1 (0 to 1)       | 1 (0 to 1)       | -2.1% (-8.4% to 4.6%)     |
| 16 | Albania | Pulmonary aspiration and foreign body in airway | 1 (1 to 2)       | 1 (0 to 2)       | -16% (-22.8% to -8.9%)    |
| 17 | Albania | Self-harm by firearm                            | 0 (0 to 0)       | 0 (0 to 1)       | 72.4% (53.6% to 94.8%)    |
| 18 | Albania | Self-harm by other specified means              | 1 (1 to 2)       | 2 (1 to 3)       | 65.8% (54% to 77.6%)      |
| 19 | Albania | Unintentional firearm injuries                  | 2 (1 to 3)       | 1 (0 to 1)       | -58.5% (-65.2% to -51.5%) |
| 20 | Albania | Venomous animal contact                         | 6 (3 to 12)      | 5 (2 to 9)       | -20.6% (-25.5% to -14.7%) |
| 21 | Algeria | Adverse effects of medical treatment            | 0 (0 to 0)       | 0 (0 to 0)       | 0% (0% to 0%)             |
| 22 | Algeria | Conflict and terrorism                          | 0 (0 to 0)       | 0 (0 to 0)       | NA                        |
| 23 | Algeria | Cyclist road injuries                           | 20 (13 to 29)    | 17 (12 to 25)    | -11.7% (-19.8% to -1.4%)  |
| 24 | Algeria | Drowning                                        | 0 (0 to 0)       | 0 (0 to 1)       | 49.8% (26.7% to 76.5%)    |
| 25 | Algeria | Environmental heat and cold exposure            | 3 (2 to 4)       | 3 (2 to 4)       | 2.8% (-1.8% to 7.8%)      |
| 26 | Algeria | Executions and police conflict                  | 0 (0 to 0)       | 0 (0 to 0)       | NA                        |
| 27 | Algeria | Exposure to forces of nature                    | 0 (0 to 0)       | 0 (0 to 0)       | NA                        |
| 28 | Algeria | Falls                                           | 82 (64 to 108)   | 97 (75 to 127)   | 18.1% (13.5% to 23.5%)    |
| 29 | Algeria | Fire, heat, and hot substances                  | 1 (1 to 2)       | 1 (0 to 1)       | -37.3% (-42.3% to -31.8%) |
| 30 | Algeria | Foreign body in eyes                            | 0 (0 to 0)       | 0 (0 to 0)       | 0.2% (0% to 0.6%)         |
| 31 | Algeria | Foreign body in other body part                 | 1 (1 to 3)       | 1 (1 to 3)       | 0.4% (-5.3% to 5.2%)      |
| 32 | Algeria | Motor vehicle road injuries                     | 70 (54 to 88)    | 46 (35 to 58)    | -34.2% (-39.6% to -28.2%) |
| 33 | Algeria | Motorcyclist road injuries                      | 12 (9 to 16)     | 8 (6 to 10)      | -37.4% (-44.1% to -29.3%) |
| 34 | Algeria | Non-venomous animal contact                     | 3 (2 to 5)       | 3 (2 to 6)       | 4.1% (-0.6% to 10.3%)     |
| 35 | Algeria | Other exposure to mechanical forces             | 28 (17 to 44)    | 24 (15 to 39)    | -13.6% (-19.1% to -7.8%)  |
| 36 | Algeria | Other road injuries                             | 2 (1 to 4)       | 2 (1 to 4)       | -2.7% (-12.9% to 10.1%)   |
| 37 | Algeria | Other transport injuries                        | 5 (4 to 7)       | 5 (4 to 7)       | 1.5% (-4.7% to 9.3%)      |
| 38 | Algeria | Other unintentional injuries                    | 19 (12 to 30)    | 16 (10 to 26)    | -17.1% (-23.4% to -11.4%) |
| 39 | Algeria | Pedestrian road injuries                        | 40 (31 to 50)    | 25 (19 to 31)    | -37.8% (-43.1% to -31.8%) |
| 40 | Algeria | Physical violence by firearm                    | 0 (0 to 0)       | 0 (0 to 1)       | 116% (93.2% to 144.1%)    |
| 41 | Algeria | Physical violence by other means                | 12 (8 to 17)     | 10 (7 to 14)     | -16.4% (-22% to -10.4%)   |
| 42 | Algeria | Physical violence by sharp object               | 2 (1 to 3)       | 1 (1 to 2)       | -25.1% (-34.5% to -15.9%) |
| 43 | Algeria | Poisoning by carbon monoxide                    | 0 (0 to 0)       | 0 (0 to 0)       | 15.6% (1.1% to 32.6%)     |
| 44 | Algeria | Poisoning by other means                        | 0 (0 to 0)       | 0 (0 to 0)       | -29.3% (-37.3% to -20.9%) |
| 45 |         |                                                 |                  |                  |                           |
| 46 |         |                                                 |                  |                  |                           |

|    |                |                                                 |                  |                  |                           |
|----|----------------|-------------------------------------------------|------------------|------------------|---------------------------|
| 1  |                |                                                 |                  |                  |                           |
| 2  | Algeria        | Pulmonary aspiration and foreign body in airway | 0 (0 to 1)       | 0 (0 to 1)       | -11.1% (-19.9% to -3.2%)  |
| 3  | Algeria        | Self-harm by firearm                            | 0 (0 to 0)       | 0 (0 to 0)       | 4.5% (-6% to 17.2%)       |
| 4  | Algeria        | Self-harm by other specified means              | 1 (1 to 2)       | 1 (1 to 2)       | -19.7% (-23.9% to -15%)   |
| 5  | Algeria        | Unintentional firearm injuries                  | 2 (1 to 3)       | 2 (1 to 3)       | 4.1% (-4.3% to 13.5%)     |
| 6  | Algeria        | Venomous animal contact                         | 2 (1 to 4)       | 2 (1 to 4)       | 5.7% (-0.4% to 13%)       |
| 7  | American Samoa | Adverse effects of medical treatment            | 0 (0 to 0)       | 0 (0 to 0)       | 0% (0% to 0%)             |
| 8  | American Samoa | Conflict and terrorism                          | 0 (0 to 0)       | 0 (0 to 0)       | NA                        |
| 9  | American Samoa | Cyclist road injuries                           | 7 (4 to 11)      | 7 (4 to 11)      | 4% (-3.3% to 12.2%)       |
| 10 | American Samoa | Drowning                                        | 0 (0 to 0)       | 0 (0 to 0)       | 0.4% (-8.6% to 11.4%)     |
| 11 | American Samoa | Environmental heat and cold exposure            | 1 (0 to 1)       | 0 (0 to 1)       | -20.9% (-27.9% to -14.4%) |
| 12 | American Samoa | Executions and police conflict                  | 0 (0 to 0)       | 0 (0 to 0)       | NA                        |
| 13 | American Samoa | Exposure to forces of nature                    | 0 (0 to 0)       | 0 (0 to 0)       | NA                        |
| 14 | American Samoa | Falls                                           | 32 (20 to 50)    | 40 (25 to 62)    | 24.7% (19.9% to 29.4%)    |
| 15 | American Samoa | Fire, heat, and hot substances                  | 0 (0 to 0)       | 0 (0 to 0)       | 12.1% (5.6% to 18.8%)     |
| 16 | American Samoa | Foreign body in eyes                            | 0 (0 to 0)       | 0 (0 to 0)       | -1.1% (-2.1% to -0.4%)    |
| 17 | American Samoa | Foreign body in other body part                 | 1 (0 to 2)       | 1 (0 to 2)       | -1.7% (-6.3% to 3.4%)     |
| 18 | American Samoa | Motor vehicle road injuries                     | 28 (19 to 38)    | 20 (14 to 29)    | -27.6% (-33.1% to -21.8%) |
| 19 | American Samoa | Motorcyclist road injuries                      | 20 (15 to 28)    | 19 (14 to 26)    | -7.7% (-14.6% to 0.3%)    |
| 20 | American Samoa | Non-venomous animal contact                     | 2 (1 to 4)       | 2 (1 to 4)       | 1.1% (-3.7% to 6.5%)      |
| 21 | American Samoa | Other exposure to mechanical forces             | 28 (14 to 51)    | 20 (10 to 38)    | -28.2% (-34.4% to -22.6%) |
| 22 | American Samoa | Other road injuries                             | 2 (1 to 4)       | 2 (1 to 3)       | -3.5% (-12.5% to 6.3%)    |
| 23 | American Samoa | Other transport injuries                        | 4 (3 to 6)       | 3 (2 to 5)       | -27.8% (-34.5% to -21.8%) |
| 24 | American Samoa | Other unintentional injuries                    | 3 (2 to 6)       | 3 (2 to 5)       | -18.8% (-23.7% to -14%)   |
| 25 | American Samoa | Pedestrian road injuries                        | 15 (10 to 21)    | 13 (9 to 17)     | -15.6% (-22.1% to -8.2%)  |
| 26 | American Samoa | Physical violence by firearm                    | 0 (0 to 0)       | 0 (0 to 0)       | -23.9% (-36.7% to -8.7%)  |
| 27 | American Samoa | Physical violence by other means                | 39 (26 to 57)    | 34 (23 to 51)    | -11.4% (-17% to -5.9%)    |
| 28 | American Samoa | Physical violence by sharp object               | 2 (1 to 4)       | 1 (1 to 3)       | -35.9% (-45.2% to -27.7%) |
| 29 | American Samoa | Poisoning by carbon monoxide                    | 0 (0 to 0)       | 0 (0 to 0)       | 9% (-0.4% to 19%)         |
| 30 | American Samoa | Poisoning by other means                        | 0 (0 to 0)       | 0 (0 to 0)       | -6.6% (-13.4% to 0.5%)    |
| 31 | American Samoa | Pulmonary aspiration and foreign body in airway | 0 (0 to 0)       | 0 (0 to 0)       | 13% (-0.7% to 26.9%)      |
| 32 | American Samoa | Self-harm by firearm                            | 0 (0 to 0)       | 0 (0 to 0)       | 1.2% (-8% to 10.4%)       |
| 33 | American Samoa | Self-harm by other specified means              | 0 (0 to 0)       | 0 (0 to 0)       | 21.1% (12.9% to 31.3%)    |
| 34 | American Samoa | Unintentional firearm injuries                  | 2 (1 to 4)       | 1 (0 to 2)       | -39.3% (-48.8% to -30.7%) |
| 35 | American Samoa | Venomous animal contact                         | 1 (0 to 2)       | 1 (0 to 2)       | -4.3% (-11.9% to 3.3%)    |
| 36 | Andorra        | Adverse effects of medical treatment            | 0 (0 to 0)       | 0 (0 to 0)       | 0% (0% to 0%)             |
| 37 | Andorra        | Conflict and terrorism                          | 0 (0 to 0)       | 0 (0 to 0)       | NA                        |
| 38 | Andorra        | Cyclist road injuries                           | 33 (23 to 44)    | 27 (19 to 37)    | -16.3% (-22.8% to -8.7%)  |
| 39 | Andorra        | Drowning                                        | 0 (0 to 0)       | 0 (0 to 0)       | 65.2% (48.1% to 81.3%)    |
| 40 | Andorra        | Environmental heat and cold exposure            | 2 (1 to 3)       | 2 (1 to 3)       | 0.9% (-2.9% to 4.9%)      |
| 41 | Andorra        | Executions and police conflict                  | 0 (0 to 0)       | 0 (0 to 0)       | NA                        |
| 42 | Andorra        | Exposure to forces of nature                    | 0 (0 to 0)       | 0 (0 to 0)       | NA                        |
| 43 | Andorra        | Falls                                           | 294 (235 to 368) | 318 (250 to 398) | 8% (3.3% to 12.7%)        |
| 44 | Andorra        | Fire, heat, and hot substances                  | 2 (1 to 3)       | 2 (1 to 3)       | 0.6% (-4.1% to 5.3%)      |
| 45 |                |                                                 |                  |                  |                           |
| 46 |                |                                                 |                  |                  |                           |

|    |         |                                                 |                 |               |                           |
|----|---------|-------------------------------------------------|-----------------|---------------|---------------------------|
| 1  |         |                                                 |                 |               |                           |
| 2  | Andorra | Foreign body in eyes                            | 0 (0 to 0)      | 0 (0 to 0)    | -0.9% (-1.7% to -0.4%)    |
| 3  | Andorra | Foreign body in other body part                 | 2 (1 to 3)      | 2 (1 to 3)    | -1% (-5.6% to 4.1%)       |
| 4  | Andorra | Motor vehicle road injuries                     | 41 (32 to 54)   | 31 (23 to 41) | -23.7% (-29.9% to -16.7%) |
| 5  | Andorra | Motorcyclist road injuries                      | 15 (11 to 20)   | 14 (10 to 18) | -7.2% (-16.8% to 3.1%)    |
| 6  | Andorra | Non-venomous animal contact                     | 2 (1 to 3)      | 2 (1 to 3)    | -6.2% (-11.2% to -1.7%)   |
| 7  | Andorra | Other exposure to mechanical forces             | 42 (25 to 67)   | 42 (25 to 69) | 1.3% (-3.6% to 6.4%)      |
| 8  | Andorra | Other road injuries                             | 2 (1 to 3)      | 2 (1 to 3)    | -9.8% (-18.2% to -0.6%)   |
| 9  | Andorra | Other transport injuries                        | 4 (3 to 6)      | 4 (3 to 6)    | 1% (-3.5% to 5.6%)        |
| 10 | Andorra | Other unintentional injuries                    | 22 (14 to 35)   | 21 (13 to 35) | -2.4% (-6.3% to 1.3%)     |
| 11 | Andorra | Pedestrian road injuries                        | 12 (9 to 15)    | 9 (6 to 12)   | -21.7% (-29.5% to -13%)   |
| 12 | Andorra | Physical violence by firearm                    | 1 (0 to 1)      | 1 (0 to 1)    | 33.4% (20.9% to 47.2%)    |
| 13 | Andorra | Physical violence by other means                | 14 (9 to 20)    | 13 (9 to 19)  | -4.4% (-10.8% to 1.9%)    |
| 14 | Andorra | Physical violence by sharp object               | 1 (1 to 2)      | 1 (1 to 2)    | -7.4% (-16.6% to 2.1%)    |
| 15 | Andorra | Poisoning by carbon monoxide                    | 0 (0 to 0)      | 0 (0 to 0)    | 10.4% (3.5% to 18.2%)     |
| 16 | Andorra | Poisoning by other means                        | 0 (0 to 0)      | 0 (0 to 0)    | -4.5% (-9.9% to 1%)       |
| 17 | Andorra | Pulmonary aspiration and foreign body in airway | 1 (1 to 2)      | 1 (0 to 1)    | -11.5% (-19.8% to -3.4%)  |
| 18 | Andorra | Self-harm by firearm                            | 0 (0 to 1)      | 0 (0 to 0)    | -13.1% (-22.8% to -2%)    |
| 19 | Andorra | Self-harm by other specified means              | 3 (2 to 4)      | 2 (1 to 4)    | -15.3% (-19.2% to -11.6%) |
| 20 | Andorra | Unintentional firearm injuries                  | 1 (0 to 2)      | 1 (0 to 2)    | 5.6% (-2.9% to 14.1%)     |
| 21 | Andorra | Venomous animal contact                         | 1 (0 to 2)      | 1 (0 to 2)    | -7.6% (-13.5% to -1.8%)   |
| 22 | Angola  | Adverse effects of medical treatment            | 0 (0 to 0)      | 0 (0 to 0)    | 0% (0% to 0%)             |
| 23 | Angola  | Conflict and terrorism                          | 163 (66 to 372) | 0 (0 to 1)    | NA                        |
| 24 | Angola  | Cyclist road injuries                           | 17 (11 to 24)   | 21 (14 to 30) | 24.7% (14% to 36%)        |
| 25 | Angola  | Drowning                                        | 0 (0 to 0)      | 0 (0 to 0)    | -28.5% (-36.5% to -20.8%) |
| 26 | Angola  | Environmental heat and cold exposure            | 2 (2 to 3)      | 2 (1 to 3)    | -9.3% (-17.1% to -2.4%)   |
| 27 | Angola  | Executions and police conflict                  | 0 (0 to 0)      | 0 (0 to 0)    | NA                        |
| 28 | Angola  | Exposure to forces of nature                    | 0 (0 to 0)      | 0 (0 to 0)    | NA                        |
| 29 | Angola  | Falls                                           | 38 (30 to 48)   | 47 (36 to 59) | 23.9% (19.5% to 28.2%)    |
| 30 | Angola  | Fire, heat, and hot substances                  | 1 (1 to 2)      | 1 (1 to 1)    | -21.8% (-28.7% to -15.6%) |
| 31 | Angola  | Foreign body in eyes                            | 0 (0 to 0)      | 0 (0 to 0)    | -2.2% (-3.8% to -1.1%)    |
| 32 | Angola  | Foreign body in other body part                 | 4 (2 to 7)      | 3 (1 to 6)    | -17.1% (-23.2% to -11.7%) |
| 33 | Angola  | Motor vehicle road injuries                     | 44 (33 to 57)   | 47 (36 to 59) | 6.5% (-1.9% to 15.3%)     |
| 34 | Angola  | Motorcyclist road injuries                      | 10 (8 to 14)    | 11 (8 to 14)  | 4.8% (-6.4% to 16.5%)     |
| 35 | Angola  | Non-venomous animal contact                     | 8 (5 to 14)     | 6 (3 to 10)   | -33% (-38.6% to -27.4%)   |
| 36 | Angola  | Other exposure to mechanical forces             | 17 (11 to 28)   | 14 (9 to 24)  | -16.2% (-22.7% to -9.3%)  |
| 37 | Angola  | Other road injuries                             | 1 (1 to 2)      | 1 (1 to 2)    | 17.7% (6% to 31.2%)       |
| 38 | Angola  | Other transport injuries                        | 6 (5 to 8)      | 5 (4 to 6)    | -18.1% (-25.5% to -10.7%) |
| 39 | Angola  | Other unintentional injuries                    | 8 (6 to 13)     | 7 (4 to 11)   | -20.2% (-26.6% to -13.2%) |
| 40 | Angola  | Pedestrian road injuries                        | 49 (37 to 61)   | 42 (32 to 52) | -15.2% (-21.7% to -9.1%)  |
| 41 | Angola  | Physical violence by firearm                    | 0 (0 to 0)      | 0 (0 to 0)    | 21.1% (8.2% to 35.1%)     |
| 42 | Angola  | Physical violence by other means                | 5 (4 to 8)      | 5 (3 to 7)    | -7.4% (-13.2% to -1.5%)   |
| 43 | Angola  | Physical violence by sharp object               | 2 (1 to 3)      | 2 (1 to 3)    | -9.4% (-16.9% to -1.7%)   |
| 44 | Angola  | Poisoning by carbon monoxide                    | 0 (0 to 0)      | 0 (0 to 0)    | 3.1% (-9.2% to 17.6%)     |
| 45 |         |                                                 |                 |               |                           |
| 46 |         |                                                 |                 |               |                           |

|    |                     |                                                 |                 |                 |                           |
|----|---------------------|-------------------------------------------------|-----------------|-----------------|---------------------------|
| 1  |                     |                                                 |                 |                 |                           |
| 2  | Angola              | Poisoning by other means                        | 0 (0 to 0)      | 0 (0 to 0)      | -32.9% (-40% to -24.6%)   |
| 3  | Angola              | Pulmonary aspiration and foreign body in airway | 0 (0 to 1)      | 0 (0 to 1)      | -39.4% (-47.4% to -30.3%) |
| 4  | Angola              | Self-harm by firearm                            | 0 (0 to 0)      | 0 (0 to 0)      | 16.9% (3.1% to 32.4%)     |
| 5  | Angola              | Self-harm by other specified means              | 1 (1 to 2)      | 1 (1 to 2)      | -5.5% (-10.4% to -0.3%)   |
| 6  | Angola              | Unintentional firearm injuries                  | 2 (1 to 3)      | 1 (1 to 2)      | -24.2% (-32.5% to -15.4%) |
| 7  | Angola              | Venomous animal contact                         | 1 (0 to 4)      | 1 (0 to 3)      | -18% (-27.1% to -7.7%)    |
| 8  | Antigua and Barbuda | Adverse effects of medical treatment            | 0 (0 to 0)      | 0 (0 to 0)      | 0% (0% to 0%)             |
| 9  | Antigua and Barbuda | Conflict and terrorism                          | 0 (0 to 0)      | 0 (0 to 0)      | NA                        |
| 10 | Antigua and Barbuda | Cyclist road injuries                           | 27 (20 to 37)   | 25 (18 to 34)   | -8.5% (-16.8% to 0.1%)    |
| 11 | Antigua and Barbuda | Drowning                                        | 0 (0 to 1)      | 0 (0 to 1)      | 16.9% (4.6% to 28.3%)     |
| 12 | Antigua and Barbuda | Environmental heat and cold exposure            | 13 (9 to 18)    | 14 (10 to 20)   | 7.6% (2.8% to 12%)        |
| 13 | Antigua and Barbuda | Executions and police conflict                  | 0 (0 to 0)      | 0 (0 to 0)      | NA                        |
| 14 | Antigua and Barbuda | Exposure to forces of nature                    | 0 (0 to 0)      | 0 (0 to 0)      | NA                        |
| 15 | Antigua and Barbuda | Falls                                           | 42 (33 to 55)   | 64 (50 to 83)   | 51.3% (45.4% to 57.4%)    |
| 16 | Antigua and Barbuda | Fire, heat, and hot substances                  | 5 (3 to 8)      | 4 (2 to 7)      | -18.3% (-23.6% to -12.7%) |
| 17 | Antigua and Barbuda | Foreign body in eyes                            | 0 (0 to 0)      | 0 (0 to 0)      | 1% (0.4% to 1.9%)         |
| 18 | Antigua and Barbuda | Foreign body in other body part                 | 1 (1 to 3)      | 1 (1 to 3)      | -0.9% (-6.8% to 5.2%)     |
| 19 | Antigua and Barbuda | Motor vehicle road injuries                     | 28 (21 to 36)   | 21 (15 to 27)   | -25.8% (-32.7% to -18.1%) |
| 20 | Antigua and Barbuda | Motorcyclist road injuries                      | 13 (9 to 17)    | 13 (10 to 18)   | 5.6% (-6.2% to 19.1%)     |
| 21 | Antigua and Barbuda | Non-venomous animal contact                     | 3 (1 to 5)      | 3 (1 to 5)      | -1.2% (-6.8% to 5.9%)     |
| 22 | Antigua and Barbuda | Other exposure to mechanical forces             | 68 (41 to 111)  | 76 (46 to 125)  | 11.7% (3.7% to 20.1%)     |
| 23 | Antigua and Barbuda | Other road injuries                             | 4 (2 to 6)      | 3 (2 to 6)      | -3.7% (-13% to 6.6%)      |
| 24 | Antigua and Barbuda | Other transport injuries                        | 4 (3 to 6)      | 4 (3 to 6)      | 2.3% (-3.5% to 8.5%)      |
| 25 | Antigua and Barbuda | Other unintentional injuries                    | 18 (11 to 29)   | 15 (10 to 24)   | -14.3% (-19.6% to -9.7%)  |
| 26 | Antigua and Barbuda | Pedestrian road injuries                        | 12 (9 to 16)    | 10 (7 to 14)    | -14.1% (-22.3% to -5.5%)  |
| 27 | Antigua and Barbuda | Physical violence by firearm                    | 1 (0 to 1)      | 1 (1 to 1)      | 86.3% (62.4% to 118.2%)   |
| 28 | Antigua and Barbuda | Physical violence by other means                | 11 (8 to 15)    | 11 (8 to 16)    | 4.7% (-3.6% to 13.7%)     |
| 29 | Antigua and Barbuda | Physical violence by sharp object               | 3 (2 to 4)      | 3 (2 to 5)      | 9.3% (-1.1% to 21.6%)     |
| 30 | Antigua and Barbuda | Poisoning by carbon monoxide                    | 0 (0 to 0)      | 0 (0 to 0)      | 6.5% (-5.9% to 20.1%)     |
| 31 | Antigua and Barbuda | Poisoning by other means                        | 0 (0 to 0)      | 0 (0 to 0)      | -17.6% (-27.1% to -8.1%)  |
| 32 | Antigua and Barbuda | Pulmonary aspiration and foreign body in airway | 0 (0 to 1)      | 0 (0 to 1)      | -19.2% (-26% to -11.8%)   |
| 33 | Antigua and Barbuda | Self-harm by firearm                            | 0 (0 to 0)      | 0 (0 to 0)      | 36.2% (20.7% to 54.9%)    |
| 34 | Antigua and Barbuda | Self-harm by other specified means              | 0 (0 to 0)      | 0 (0 to 1)      | 23.4% (14.1% to 34.5%)    |
| 35 | Antigua and Barbuda | Unintentional firearm injuries                  | 10 (7 to 15)    | 12 (7 to 18)    | 14.1% (1.4% to 29.5%)     |
| 36 | Antigua and Barbuda | Venomous animal contact                         | 4 (2 to 8)      | 4 (2 to 8)      | -1.5% (-6.8% to 4.6%)     |
| 37 | Argentina           | Adverse effects of medical treatment            | 0 (0 to 0)      | 0 (0 to 0)      | 0% (0% to 0%)             |
| 38 | Argentina           | Conflict and terrorism                          | 3 (1 to 6)      | 0 (0 to 0)      | NA                        |
| 39 | Argentina           | Cyclist road injuries                           | 25 (18 to 33)   | 24 (17 to 33)   | -1.7% (-11.4% to 10.1%)   |
| 40 | Argentina           | Drowning                                        | 0 (0 to 0)      | 0 (0 to 0)      | 23.5% (7.5% to 38.4%)     |
| 41 | Argentina           | Environmental heat and cold exposure            | 2 (1 to 2)      | 2 (1 to 2)      | 1.4% (-4% to 7.8%)        |
| 42 | Argentina           | Executions and police conflict                  | 0 (0 to 0)      | 0 (0 to 0)      | NA                        |
| 43 | Argentina           | Exposure to forces of nature                    | 0 (0 to 0)      | 0 (0 to 0)      | NA                        |
| 44 | Argentina           | Falls                                           | 124 (95 to 162) | 129 (97 to 171) | 3.9% (-1.5% to 8.8%)      |
| 45 |                     |                                                 |                 |                 |                           |
| 46 |                     |                                                 |                 |                 |                           |

|    |           |                                                 |                  |                 |                           |
|----|-----------|-------------------------------------------------|------------------|-----------------|---------------------------|
| 1  |           |                                                 |                  |                 |                           |
| 2  | Argentina | Fire, heat, and hot substances                  | 4 (2 to 6)       | 4 (2 to 6)      | -2% (-8.1% to 4.2%)       |
| 3  | Argentina | Foreign body in eyes                            | 0 (0 to 0)       | 0 (0 to 0)      | 0% (0% to 0.1%)           |
| 4  | Argentina | Foreign body in other body part                 | 3 (1 to 5)       | 2 (1 to 5)      | -7.5% (-12.4% to -2.2%)   |
| 5  | Argentina | Motor vehicle road injuries                     | 36 (28 to 45)    | 42 (33 to 53)   | 17.2% (6.6% to 31.4%)     |
| 6  | Argentina | Motorcyclist road injuries                      | 6 (4 to 8)       | 12 (9 to 16)    | 99.1% (69.9% to 141.2%)   |
| 7  | Argentina | Non-venomous animal contact                     | 6 (3 to 10)      | 5 (3 to 8)      | -17.8% (-21.6% to -14.1%) |
| 8  | Argentina | Other exposure to mechanical forces             | 88 (54 to 138)   | 86 (53 to 135)  | -1.7% (-8.2% to 5.2%)     |
| 9  | Argentina | Other road injuries                             | 1 (1 to 2)       | 1 (1 to 2)      | 1% (-9% to 12%)           |
| 10 | Argentina | Other transport injuries                        | 5 (4 to 6)       | 4 (3 to 5)      | -25.5% (-31.5% to -19.3%) |
| 11 | Argentina | Other unintentional injuries                    | 39 (25 to 61)    | 34 (22 to 54)   | -13% (-18.3% to -6.6%)    |
| 12 | Argentina | Pedestrian road injuries                        | 11 (8 to 14)     | 9 (7 to 13)     | -14.8% (-23.2% to -5.3%)  |
| 13 | Argentina | Physical violence by firearm                    | 1 (1 to 1)       | 2 (1 to 3)      | 74.8% (49.4% to 106.4%)   |
| 14 | Argentina | Physical violence by other means                | 32 (23 to 45)    | 36 (25 to 51)   | 11.3% (-1.2% to 24.6%)    |
| 15 | Argentina | Physical violence by sharp object               | 6 (4 to 9)       | 7 (4 to 10)     | 14.4% (-2.1% to 33.9%)    |
| 16 | Argentina | Poisoning by carbon monoxide                    | 0 (0 to 0)       | 0 (0 to 0)      | 41.4% (28.1% to 57.7%)    |
| 17 | Argentina | Poisoning by other means                        | 0 (0 to 1)       | 0 (0 to 1)      | -6.2% (-13.7% to 2%)      |
| 18 | Argentina | Pulmonary aspiration and foreign body in airway | 1 (0 to 1)       | 0 (0 to 1)      | -43.4% (-50.6% to -36%)   |
| 19 | Argentina | Self-harm by firearm                            | 1 (0 to 1)       | 1 (0 to 1)      | 15.9% (-0.7% to 33%)      |
| 20 | Argentina | Self-harm by other specified means              | 1 (1 to 2)       | 2 (2 to 4)      | 68.4% (56% to 81.9%)      |
| 21 | Argentina | Unintentional firearm injuries                  | 7 (4 to 11)      | 4 (3 to 7)      | -38.3% (-47% to -29.8%)   |
| 22 | Argentina | Venomous animal contact                         | 4 (2 to 7)       | 3 (1 to 6)      | -18.2% (-22.4% to -13.7%) |
| 23 | Armenia   | Adverse effects of medical treatment            | 0 (0 to 0)       | 0 (0 to 0)      | 0% (0% to 0%)             |
| 24 | Armenia   | Conflict and terrorism                          | 4 (2 to 10)      | 0 (0 to 0)      | NA                        |
| 25 | Armenia   | Cyclist road injuries                           | 24 (16 to 33)    | 20 (14 to 27)   | -17% (-25.4% to -7.4%)    |
| 26 | Armenia   | Drowning                                        | 1 (0 to 1)       | 1 (0 to 1)      | 5.1% (-9.6% to 19.6%)     |
| 27 | Armenia   | Environmental heat and cold exposure            | 5 (3 to 7)       | 5 (3 to 6)      | 0.1% (-7.4% to 9.6%)      |
| 28 | Armenia   | Executions and police conflict                  | 0 (0 to 0)       | 0 (0 to 0)      | NA                        |
| 29 | Armenia   | Exposure to forces of nature                    | 0 (0 to 0)       | 0 (0 to 0)      | NA                        |
| 30 | Armenia   | Falls                                           | 182 (142 to 235) | 118 (88 to 158) | -35.1% (-41.2% to -28.4%) |
| 31 | Armenia   | Fire, heat, and hot substances                  | 6 (4 to 10)      | 4 (2 to 6)      | -37% (-47.3% to -27.4%)   |
| 32 | Armenia   | Foreign body in eyes                            | 0 (0 to 0)       | 0 (0 to 0)      | 0.8% (0.4% to 1.4%)       |
| 33 | Armenia   | Foreign body in other body part                 | 2 (1 to 5)       | 2 (1 to 4)      | -14.9% (-20% to -9.9%)    |
| 34 | Armenia   | Motor vehicle road injuries                     | 57 (44 to 71)    | 47 (36 to 60)   | -16.4% (-25.4% to -6.5%)  |
| 35 | Armenia   | Motorcyclist road injuries                      | 10 (7 to 13)     | 6 (4 to 8)      | -41.3% (-51.2% to -30.8%) |
| 36 | Armenia   | Non-venomous animal contact                     | 3 (1 to 5)       | 3 (1 to 5)      | -3.3% (-9.4% to 3.1%)     |
| 37 | Armenia   | Other exposure to mechanical forces             | 81 (51 to 126)   | 58 (36 to 92)   | -28.3% (-36.3% to -20.6%) |
| 38 | Armenia   | Other road injuries                             | 3 (1 to 4)       | 2 (1 to 3)      | -21.5% (-30.9% to -11.2%) |
| 39 | Armenia   | Other transport injuries                        | 4 (3 to 6)       | 5 (3 to 7)      | 9% (4.4% to 14.3%)        |
| 40 | Armenia   | Other unintentional injuries                    | 35 (23 to 56)    | 25 (16 to 40)   | -30.7% (-37% to -23.1%)   |
| 41 | Armenia   | Pedestrian road injuries                        | 29 (22 to 36)    | 19 (14 to 25)   | -32.8% (-39.7% to -24.7%) |
| 42 | Armenia   | Physical violence by firearm                    | 0 (0 to 0)       | 0 (0 to 0)      | 50% (28.9% to 74.1%)      |
| 43 | Armenia   | Physical violence by other means                | 23 (16 to 31)    | 19 (13 to 26)   | -17.4% (-26.4% to -6.9%)  |
| 44 | Armenia   | Physical violence by sharp object               | 2 (2 to 4)       | 2 (1 to 4)      | -12.5% (-26.4% to 1.1%)   |
| 45 |           |                                                 |                  |                 |                           |
| 46 |           |                                                 |                  |                 |                           |



|    |           |                                                 |                  |                  |                           |
|----|-----------|-------------------------------------------------|------------------|------------------|---------------------------|
| 1  |           |                                                 |                  |                  |                           |
| 2  | Armenia   | Poisoning by carbon monoxide                    | 0 (0 to 0)       | 0 (0 to 0)       | -11.8% (-26.8% to 3.3%)   |
| 3  | Armenia   | Poisoning by other means                        | 0 (0 to 1)       | 0 (0 to 1)       | -17% (-27.7% to -6.9%)    |
| 4  | Armenia   | Pulmonary aspiration and foreign body in airway | 2 (1 to 3)       | 1 (1 to 2)       | -33.1% (-41% to -26.4%)   |
| 5  | Armenia   | Self-harm by firearm                            | 0 (0 to 0)       | 0 (0 to 0)       | 128.4% (99.4% to 160.5%)  |
| 6  | Armenia   | Self-harm by other specified means              | 1 (1 to 1)       | 2 (1 to 3)       | 98.7% (84.4% to 115.3%)   |
| 7  | Armenia   | Unintentional firearm injuries                  | 2 (1 to 3)       | 1 (1 to 2)       | -49.3% (-57.3% to -39.5%) |
| 8  | Armenia   | Venomous animal contact                         | 3 (1 to 6)       | 3 (1 to 5)       | -15.9% (-21.6% to -10.8%) |
| 9  | Australia | Adverse effects of medical treatment            | 0 (0 to 0)       | 0 (0 to 0)       | 0% (0% to 0%)             |
| 10 | Australia | Conflict and terrorism                          | 0 (0 to 0)       | 0 (0 to 0)       | NA                        |
| 11 | Australia | Cyclist road injuries                           | 10 (6 to 14)     | 8 (5 to 11)      | -18.9% (-30.1% to -5.9%)  |
| 12 | Australia | Drowning                                        | 0 (0 to 0)       | 0 (0 to 0)       | 35.9% (22.9% to 51.8%)    |
| 13 | Australia | Environmental heat and cold exposure            | 3 (2 to 4)       | 2 (2 to 3)       | -15.2% (-21.3% to -10.3%) |
| 14 | Australia | Executions and police conflict                  | 0 (0 to 0)       | 0 (0 to 0)       | NA                        |
| 15 | Australia | Exposure to forces of nature                    | 0 (0 to 0)       | 0 (0 to 0)       | NA                        |
| 16 | Australia | Falls                                           | 259 (198 to 346) | 338 (262 to 442) | 30.4% (24.4% to 37.1%)    |
| 17 | Australia | Fire, heat, and hot substances                  | 3 (2 to 6)       | 3 (2 to 6)       | -4.5% (-10.2% to 1.1%)    |
| 18 | Australia | Foreign body in eyes                            | 0 (0 to 0)       | 0 (0 to 0)       | 0.2% (-0.1% to 0.7%)      |
| 19 | Australia | Foreign body in other body part                 | 5 (3 to 11)      | 5 (3 to 11)      | 0.8% (-4.1% to 6.9%)      |
| 20 | Australia | Motor vehicle road injuries                     | 51 (40 to 64)    | 32 (25 to 40)    | -37.7% (-45.2% to -29.7%) |
| 21 | Australia | Motorcyclist road injuries                      | 14 (10 to 18)    | 12 (9 to 15)     | -15.6% (-31.1% to 0.7%)   |
| 22 | Australia | Non-venomous animal contact                     | 13 (7 to 23)     | 12 (6 to 20)     | -13% (-16.8% to -8.8%)    |
| 23 | Australia | Other exposure to mechanical forces             | 191 (117 to 304) | 177 (106 to 286) | -7.1% (-14.5% to -0.9%)   |
| 24 | Australia | Other road injuries                             | 1 (0 to 1)       | 1 (0 to 1)       | -4.4% (-16.4% to 9.5%)    |
| 25 | Australia | Other transport injuries                        | 7 (5 to 9)       | 6 (4 to 8)       | -14.1% (-20.6% to -7.6%)  |
| 26 | Australia | Other unintentional injuries                    | 61 (39 to 96)    | 54 (35 to 86)    | -11.4% (-17.3% to -6.6%)  |
| 27 | Australia | Pedestrian road injuries                        | 13 (10 to 16)    | 8 (6 to 11)      | -34.9% (-43.9% to -24.7%) |
| 28 | Australia | Physical violence by firearm                    | 1 (0 to 1)       | 1 (0 to 1)       | 27.2% (14.9% to 42.9%)    |
| 29 | Australia | Physical violence by other means                | 45 (32 to 64)    | 42 (29 to 59)    | -7.3% (-14.3% to 0.1%)    |
| 30 | Australia | Physical violence by sharp object               | 3 (2 to 5)       | 3 (1 to 4)       | -18.5% (-27.2% to -9.3%)  |
| 31 | Australia | Poisoning by carbon monoxide                    | 0 (0 to 0)       | 0 (0 to 0)       | 7.1% (-1.6% to 15.1%)     |
| 32 | Australia | Poisoning by other means                        | 0 (0 to 0)       | 0 (0 to 0)       | -2.1% (-9.1% to 3.9%)     |
| 33 | Australia | Pulmonary aspiration and foreign body in airway | 1 (1 to 2)       | 1 (1 to 2)       | -8.4% (-12.8% to -3.3%)   |
| 34 | Australia | Self-harm by firearm                            | 0 (0 to 1)       | 0 (0 to 0)       | -52.3% (-61.9% to -41.3%) |
| 35 | Australia | Self-harm by other specified means              | 4 (2 to 6)       | 4 (2 to 6)       | 0.1% (-5.7% to 6.4%)      |
| 36 | Australia | Unintentional firearm injuries                  | 1 (1 to 2)       | 1 (0 to 2)       | -9.3% (-20.3% to 2.8%)    |
| 37 | Australia | Venomous animal contact                         | 3 (1 to 7)       | 3 (1 to 6)       | -15.3% (-20.2% to -10.2%) |
| 38 | Austria   | Adverse effects of medical treatment            | 0 (0 to 0)       | 0 (0 to 0)       | 0% (0% to 0%)             |
| 39 | Austria   | Conflict and terrorism                          | 0 (0 to 0)       | 0 (0 to 0)       | NA                        |
| 40 | Austria   | Cyclist road injuries                           | 26 (19 to 35)    | 19 (13 to 25)    | -29.7% (-39.1% to -18.8%) |
| 41 | Austria   | Drowning                                        | 0 (0 to 0)       | 0 (0 to 0)       | 38.9% (21.9% to 54.8%)    |
| 42 | Austria   | Environmental heat and cold exposure            | 2 (1 to 3)       | 2 (1 to 3)       | 3.5% (-1.9% to 9.3%)      |
| 43 | Austria   | Executions and police conflict                  | 0 (0 to 0)       | 0 (0 to 0)       | NA                        |
| 44 | Austria   | Exposure to forces of nature                    | 0 (0 to 0)       | 0 (0 to 0)       | NA                        |
| 45 |           |                                                 |                  |                  |                           |
| 46 |           |                                                 |                  |                  |                           |

|    |            |                                                 |                  |                  |                           |
|----|------------|-------------------------------------------------|------------------|------------------|---------------------------|
| 1  |            |                                                 |                  |                  |                           |
| 2  | Austria    | Falls                                           | 312 (247 to 397) | 300 (236 to 379) | -3.8% (-8.6% to 1%)       |
| 3  | Austria    | Fire, heat, and hot substances                  | 2 (1 to 4)       | 2 (1 to 4)       | -4.2% (-9.3% to 1.6%)     |
| 4  | Austria    | Foreign body in eyes                            | 0 (0 to 0)       | 0 (0 to 0)       | 0.9% (0.2% to 1.9%)       |
| 5  | Austria    | Foreign body in other body part                 | 2 (1 to 3)       | 2 (1 to 3)       | 1.6% (-2.6% to 6.7%)      |
| 6  | Austria    | Motor vehicle road injuries                     | 44 (34 to 57)    | 19 (14 to 25)    | -56.4% (-63.2% to -48.7%) |
| 7  | Austria    | Motorcyclist road injuries                      | 14 (10 to 18)    | 10 (7 to 13)     | -30% (-42.5% to -15.6%)   |
| 8  | Austria    | Non-venomous animal contact                     | 2 (1 to 4)       | 2 (1 to 4)       | -12.9% (-17.8% to -7.3%)  |
| 9  | Austria    | Other exposure to mechanical forces             | 66 (42 to 104)   | 46 (28 to 74)    | -30.2% (-38.2% to -23%)   |
| 10 | Austria    | Other road injuries                             | 1 (1 to 2)       | 1 (1 to 2)       | -17.3% (-29.2% to -3.7%)  |
| 11 | Austria    | Other transport injuries                        | 5 (4 to 7)       | 5 (4 to 7)       | -7% (-12.6% to -0.7%)     |
| 12 | Austria    | Other unintentional injuries                    | 23 (14 to 36)    | 22 (14 to 35)    | -4.2% (-9.9% to 0.6%)     |
| 13 | Austria    | Pedestrian road injuries                        | 12 (10 to 16)    | 6 (4 to 8)       | -50.7% (-58.1% to -41.7%) |
| 14 | Austria    | Physical violence by firearm                    | 0 (0 to 1)       | 1 (0 to 1)       | 36.2% (23.6% to 49.8%)    |
| 15 | Austria    | Physical violence by other means                | 14 (10 to 20)    | 14 (10 to 21)    | 1.5% (-4.8% to 7.2%)      |
| 16 | Austria    | Physical violence by sharp object               | 2 (1 to 3)       | 1 (1 to 2)       | -17.4% (-25.4% to -9%)    |
| 17 | Austria    | Poisoning by carbon monoxide                    | 0 (0 to 0)       | 0 (0 to 0)       | 14.4% (6.2% to 23.5%)     |
| 18 | Austria    | Poisoning by other means                        | 0 (0 to 0)       | 0 (0 to 0)       | -3.8% (-9.3% to 1.9%)     |
| 19 | Austria    | Pulmonary aspiration and foreign body in airway | 1 (1 to 2)       | 1 (0 to 1)       | -7.3% (-15.5% to 1.7%)    |
| 20 | Austria    | Self-harm by firearm                            | 1 (0 to 1)       | 1 (0 to 1)       | -35.2% (-44.2% to -25.3%) |
| 21 | Austria    | Self-harm by other specified means              | 4 (3 to 7)       | 3 (2 to 5)       | -32.4% (-36.3% to -28%)   |
| 22 | Austria    | Unintentional firearm injuries                  | 1 (1 to 2)       | 1 (1 to 2)       | 5.8% (-5.7% to 17.4%)     |
| 23 | Austria    | Venomous animal contact                         | 1 (0 to 2)       | 1 (0 to 2)       | -12.5% (-17.8% to -6.2%)  |
| 24 | Azerbaijan | Adverse effects of medical treatment            | 0 (0 to 0)       | 0 (0 to 0)       | 0% (0% to 0%)             |
| 25 | Azerbaijan | Conflict and terrorism                          | 2 (1 to 6)       | 0 (0 to 0)       | NA                        |
| 26 | Azerbaijan | Cyclist road injuries                           | 20 (14 to 28)    | 18 (12 to 26)    | -9.7% (-19% to 0.7%)      |
| 27 | Azerbaijan | Drowning                                        | 1 (0 to 1)       | 1 (0 to 1)       | 17.5% (3.9% to 34%)       |
| 28 | Azerbaijan | Environmental heat and cold exposure            | 5 (3 to 7)       | 4 (3 to 6)       | -8.3% (-14.1% to -1.7%)   |
| 29 | Azerbaijan | Executions and police conflict                  | 0 (0 to 0)       | 0 (0 to 0)       | NA                        |
| 30 | Azerbaijan | Exposure to forces of nature                    | 0 (0 to 0)       | 0 (0 to 0)       | NA                        |
| 31 | Azerbaijan | Falls                                           | 106 (80 to 142)  | 113 (85 to 153)  | 7% (0.8% to 13.1%)        |
| 32 | Azerbaijan | Fire, heat, and hot substances                  | 6 (4 to 10)      | 5 (3 to 8)       | -21.7% (-27.9% to -15.1%) |
| 33 | Azerbaijan | Foreign body in eyes                            | 0 (0 to 0)       | 0 (0 to 0)       | 2.5% (1.6% to 3.7%)       |
| 34 | Azerbaijan | Foreign body in other body part                 | 2 (1 to 4)       | 2 (1 to 4)       | 1.2% (-4.6% to 7.7%)      |
| 35 | Azerbaijan | Motor vehicle road injuries                     | 60 (47 to 77)    | 46 (35 to 58)    | -24.7% (-32.7% to -16.5%) |
| 36 | Azerbaijan | Motorcyclist road injuries                      | 6 (4 to 8)       | 3 (2 to 4)       | -46.5% (-54% to -38%)     |
| 37 | Azerbaijan | Non-venomous animal contact                     | 2 (1 to 4)       | 2 (1 to 4)       | -10% (-14.8% to -4.3%)    |
| 38 | Azerbaijan | Other exposure to mechanical forces             | 55 (34 to 87)    | 55 (34 to 86)    | -0.6% (-6.6% to 6.2%)     |
| 39 | Azerbaijan | Other road injuries                             | 2 (1 to 3)       | 2 (1 to 3)       | -1.3% (-12.4% to 11%)     |
| 40 | Azerbaijan | Other transport injuries                        | 4 (3 to 6)       | 5 (4 to 7)       | 13.5% (7.8% to 20.2%)     |
| 41 | Azerbaijan | Other unintentional injuries                    | 20 (13 to 33)    | 21 (13 to 33)    | 1.7% (-3.9% to 6.8%)      |
| 42 | Azerbaijan | Pedestrian road injuries                        | 27 (20 to 35)    | 21 (16 to 27)    | -19.8% (-28.2% to -10.6%) |
| 43 | Azerbaijan | Physical violence by firearm                    | 0 (0 to 0)       | 0 (0 to 0)       | -18.1% (-36.7% to 3.6%)   |
| 44 | Azerbaijan | Physical violence by other means                | 38 (27 to 53)    | 17 (12 to 24)    | -55.7% (-61.8% to -48.3%) |
| 45 |            |                                                 |                  |                  |                           |
| 46 |            |                                                 |                  |                  |                           |

|    |            |                                                 |               |               |                           |
|----|------------|-------------------------------------------------|---------------|---------------|---------------------------|
| 1  |            |                                                 |               |               |                           |
| 2  | Azerbaijan | Physical violence by sharp object               | 3 (2 to 5)    | 2 (1 to 3)    | -49.7% (-58.5% to -39.3%) |
| 3  | Azerbaijan | Poisoning by carbon monoxide                    | 0 (0 to 0)    | 0 (0 to 0)    | 16.7% (3.4% to 30.5%)     |
| 4  | Azerbaijan | Poisoning by other means                        | 0 (0 to 1)    | 0 (0 to 1)    | -8.8% (-18.3% to -0.2%)   |
| 5  | Azerbaijan | Pulmonary aspiration and foreign body in airway | 1 (1 to 2)    | 1 (1 to 2)    | -12.4% (-19.5% to -4.9%)  |
| 6  | Azerbaijan | Self-harm by firearm                            | 0 (0 to 0)    | 0 (0 to 0)    | 34.2% (19.2% to 51.4%)    |
| 7  | Azerbaijan | Self-harm by other specified means              | 1 (1 to 1)    | 1 (1 to 2)    | 27.3% (20% to 35.3%)      |
| 8  | Azerbaijan | Unintentional firearm injuries                  | 1 (1 to 2)    | 1 (1 to 2)    | 1.9% (-6.7% to 11.2%)     |
| 9  | Azerbaijan | Venomous animal contact                         | 3 (1 to 5)    | 2 (1 to 4)    | -9.6% (-14.2% to -4.3%)   |
| 10 | Bahamas    | Adverse effects of medical treatment            | 0 (0 to 0)    | 0 (0 to 0)    | 0% (0% to 0%)             |
| 11 | Bahamas    | Conflict and terrorism                          | 0 (0 to 0)    | 0 (0 to 0)    | NA                        |
| 12 | Bahamas    | Cyclist road injuries                           | 34 (24 to 45) | 26 (18 to 35) | -23.4% (-31.8% to -14.3%) |
| 13 | Bahamas    | Drowning                                        | 0 (0 to 1)    | 0 (0 to 1)    | 13.6% (2.7% to 24.9%)     |
| 14 | Bahamas    | Environmental heat and cold exposure            | 11 (8 to 15)  | 11 (8 to 15)  | 1.1% (-3.7% to 5.4%)      |
| 15 | Bahamas    | Executions and police conflict                  | 0 (0 to 0)    | 0 (0 to 0)    | NA                        |
| 16 | Bahamas    | Exposure to forces of nature                    | 0 (0 to 0)    | 0 (0 to 0)    | NA                        |
| 17 | Bahamas    | Falls                                           | 51 (40 to 65) | 70 (55 to 90) | 38.9% (33.4% to 44.7%)    |
| 18 | Bahamas    | Fire, heat, and hot substances                  | 5 (3 to 9)    | 5 (3 to 8)    | -16.1% (-21.6% to -9.9%)  |
| 19 | Bahamas    | Foreign body in eyes                            | 0 (0 to 0)    | 0 (0 to 0)    | 0.3% (0% to 0.7%)         |
| 20 | Bahamas    | Foreign body in other body part                 | 1 (1 to 3)    | 1 (1 to 3)    | -4.2% (-10% to 2.3%)      |
| 21 | Bahamas    | Motor vehicle road injuries                     | 45 (34 to 58) | 34 (25 to 43) | -25.5% (-33.6% to -16.4%) |
| 22 | Bahamas    | Motorcyclist road injuries                      | 22 (17 to 29) | 25 (19 to 31) | 13.4% (-0.3% to 29.2%)    |
| 23 | Bahamas    | Non-venomous animal contact                     | 2 (1 to 4)    | 2 (1 to 4)    | 1.1% (-4.8% to 7.8%)      |
| 24 | Bahamas    | Other exposure to mechanical forces             | 28 (16 to 46) | 33 (19 to 55) | 17.8% (12% to 24.3%)      |
| 25 | Bahamas    | Other road injuries                             | 5 (3 to 8)    | 4 (2 to 6)    | -18.4% (-27.5% to -8.3%)  |
| 26 | Bahamas    | Other transport injuries                        | 6 (5 to 8)    | 7 (6 to 9)    | 16.3% (8.8% to 24.8%)     |
| 27 | Bahamas    | Other unintentional injuries                    | 12 (8 to 20)  | 12 (7 to 20)  | -5% (-10.6% to 0.4%)      |
| 28 | Bahamas    | Pedestrian road injuries                        | 22 (17 to 28) | 15 (11 to 19) | -34.3% (-40.9% to -27.3%) |
| 29 | Bahamas    | Physical violence by firearm                    | 2 (1 to 3)    | 7 (5 to 9)    | 204.5% (155.3% to 261.8%) |
| 30 | Bahamas    | Physical violence by other means                | 15 (11 to 23) | 20 (14 to 30) | 30.7% (17.6% to 43.9%)    |
| 31 | Bahamas    | Physical violence by sharp object               | 6 (4 to 9)    | 9 (5 to 14)   | 46.1% (26.8% to 67%)      |
| 32 | Bahamas    | Poisoning by carbon monoxide                    | 0 (0 to 0)    | 0 (0 to 0)    | 9.8% (-1.4% to 22.1%)     |
| 33 | Bahamas    | Poisoning by other means                        | 0 (0 to 0)    | 0 (0 to 0)    | -5% (-13.6% to 3.9%)      |
| 34 | Bahamas    | Pulmonary aspiration and foreign body in airway | 1 (0 to 1)    | 0 (0 to 1)    | -25% (-32% to -17%)       |
| 35 | Bahamas    | Self-harm by firearm                            | 0 (0 to 0)    | 0 (0 to 0)    | -0.5% (-10.3% to 9%)      |
| 36 | Bahamas    | Self-harm by other specified means              | 0 (0 to 0)    | 0 (0 to 0)    | 9.5% (2.6% to 17.5%)      |
| 37 | Bahamas    | Unintentional firearm injuries                  | 3 (2 to 6)    | 4 (2 to 7)    | 18.7% (10.6% to 27.8%)    |
| 38 | Bahamas    | Venomous animal contact                         | 4 (2 to 7)    | 4 (2 to 7)    | 1.1% (-4.5% to 7.3%)      |
| 39 | Bahrain    | Adverse effects of medical treatment            | 0 (0 to 0)    | 0 (0 to 0)    | 0% (0% to 0%)             |
| 40 | Bahrain    | Conflict and terrorism                          | 0 (0 to 0)    | 0 (0 to 0)    | NA                        |
| 41 | Bahrain    | Cyclist road injuries                           | 19 (13 to 27) | 17 (12 to 24) | -9.9% (-18.7% to 0.6%)    |
| 42 | Bahrain    | Drowning                                        | 0 (0 to 0)    | 0 (0 to 1)    | 88.9% (56.3% to 122%)     |
| 43 | Bahrain    | Environmental heat and cold exposure            | 4 (3 to 6)    | 4 (3 to 6)    | 2.9% (-2.7% to 8.1%)      |
| 44 | Bahrain    | Executions and police conflict                  | 0 (0 to 0)    | 0 (0 to 0)    | NA                        |
| 45 |            |                                                 |               |               |                           |
| 46 |            |                                                 |               |               |                           |

|    |            |                                                 |                |                |                           |
|----|------------|-------------------------------------------------|----------------|----------------|---------------------------|
| 1  |            |                                                 |                |                |                           |
| 2  | Bahrain    | Exposure to forces of nature                    | 0 (0 to 0)     | 0 (0 to 0)     | NA                        |
| 3  | Bahrain    | Falls                                           | 67 (52 to 88)  | 95 (72 to 126) | 41.5% (35.3% to 47.7%)    |
| 4  | Bahrain    | Fire, heat, and hot substances                  | 1 (0 to 1)     | 1 (0 to 1)     | -1.6% (-8% to 4.6%)       |
| 5  | Bahrain    | Foreign body in eyes                            | 0 (0 to 0)     | 0 (0 to 0)     | 1.2% (0.4% to 2.7%)       |
| 6  | Bahrain    | Foreign body in other body part                 | 1 (1 to 3)     | 1 (1 to 3)     | 1.8% (-2.8% to 6.4%)      |
| 7  | Bahrain    | Motor vehicle road injuries                     | 66 (52 to 82)  | 39 (30 to 50)  | -41.4% (-47.2% to -34.9%) |
| 8  | Bahrain    | Motorcyclist road injuries                      | 10 (7 to 13)   | 10 (7 to 13)   | 0.2% (-10.8% to 12%)      |
| 9  | Bahrain    | Non-venomous animal contact                     | 3 (1 to 5)     | 3 (1 to 5)     | 2.6% (-2.8% to 7.4%)      |
| 10 | Bahrain    | Other exposure to mechanical forces             | 24 (14 to 39)  | 26 (15 to 42)  | 9.6% (3.5% to 15.6%)      |
| 11 | Bahrain    | Other road injuries                             | 3 (1 to 4)     | 2 (1 to 4)     | -9% (-19.2% to 3.5%)      |
| 12 | Bahrain    | Other transport injuries                        | 5 (4 to 7)     | 6 (4 to 8)     | 6.6% (-0.4% to 13.8%)     |
| 13 | Bahrain    | Other unintentional injuries                    | 19 (12 to 30)  | 19 (12 to 31)  | 0.2% (-5% to 5.6%)        |
| 14 | Bahrain    | Pedestrian road injuries                        | 18 (14 to 24)  | 15 (11 to 20)  | -18% (-25.8% to -9.6%)    |
| 15 | Bahrain    | Physical violence by firearm                    | 0 (0 to 0)     | 1 (0 to 1)     | 146.3% (120.9% to 177.6%) |
| 16 | Bahrain    | Physical violence by other means                | 15 (10 to 20)  | 14 (10 to 19)  | -6.3% (-11.6% to -1.3%)   |
| 17 | Bahrain    | Physical violence by sharp object               | 2 (1 to 3)     | 2 (1 to 3)     | -3.9% (-11.6% to 4.8%)    |
| 18 | Bahrain    | Poisoning by carbon monoxide                    | 0 (0 to 0)     | 0 (0 to 0)     | 42.3% (29.8% to 57.8%)    |
| 19 | Bahrain    | Poisoning by other means                        | 0 (0 to 0)     | 0 (0 to 0)     | -6.1% (-13.1% to 1.8%)    |
| 20 | Bahrain    | Pulmonary aspiration and foreign body in airway | 0 (0 to 1)     | 0 (0 to 1)     | -11.2% (-20.4% to -2.9%)  |
| 21 | Bahrain    | Self-harm by firearm                            | 0 (0 to 0)     | 0 (0 to 0)     | 13.6% (0% to 29.4%)       |
| 22 | Bahrain    | Self-harm by other specified means              | 1 (1 to 2)     | 1 (1 to 2)     | 32.3% (24.4% to 41.5%)    |
| 23 | Bahrain    | Unintentional firearm injuries                  | 2 (1 to 3)     | 2 (1 to 3)     | 10% (1% to 20.5%)         |
| 24 | Bahrain    | Venomous animal contact                         | 2 (1 to 3)     | 2 (1 to 3)     | 4% (-2.3% to 11%)         |
| 25 | Bangladesh | Adverse effects of medical treatment            | 0 (0 to 0)     | 0 (0 to 0)     | 0% (0% to 0%)             |
| 26 | Bangladesh | Conflict and terrorism                          | 1 (0 to 2)     | 1 (0 to 1)     | NA                        |
| 27 | Bangladesh | Cyclist road injuries                           | 90 (69 to 116) | 88 (66 to 113) | -2.2% (-8.9% to 5.6%)     |
| 28 | Bangladesh | Drowning                                        | 0 (0 to 1)     | 0 (0 to 1)     | -8.9% (-19.5% to 2.9%)    |
| 29 | Bangladesh | Environmental heat and cold exposure            | 2 (2 to 3)     | 3 (2 to 4)     | 7.5% (2.2% to 13.9%)      |
| 30 | Bangladesh | Executions and police conflict                  | 0 (0 to 0)     | 0 (0 to 0)     | NA                        |
| 31 | Bangladesh | Exposure to forces of nature                    | 2 (1 to 5)     | 0 (0 to 0)     | NA                        |
| 32 | Bangladesh | Falls                                           | 33 (24 to 45)  | 53 (40 to 71)  | 62.9% (55.3% to 71.2%)    |
| 33 | Bangladesh | Fire, heat, and hot substances                  | 1 (0 to 1)     | 0 (0 to 1)     | -7.2% (-18.1% to 2.6%)    |
| 34 | Bangladesh | Foreign body in eyes                            | 0 (0 to 0)     | 0 (0 to 0)     | -1.9% (-3.3% to -0.9%)    |
| 35 | Bangladesh | Foreign body in other body part                 | 1 (1 to 3)     | 1 (1 to 2)     | -15% (-20.8% to -8.3%)    |
| 36 | Bangladesh | Motor vehicle road injuries                     | 25 (18 to 34)  | 29 (21 to 38)  | 14.7% (4.9% to 25.2%)     |
| 37 | Bangladesh | Motorcyclist road injuries                      | 28 (21 to 37)  | 35 (27 to 45)  | 22.7% (12.8% to 33.5%)    |
| 38 | Bangladesh | Non-venomous animal contact                     | 9 (5 to 16)    | 9 (5 to 17)    | -0.1% (-6.7% to 6.5%)     |
| 39 | Bangladesh | Other exposure to mechanical forces             | 8 (5 to 14)    | 11 (6 to 18)   | 27.5% (19.6% to 34.6%)    |
| 40 | Bangladesh | Other road injuries                             | 2 (1 to 4)     | 3 (2 to 5)     | 10.5% (0.9% to 21.3%)     |
| 41 | Bangladesh | Other transport injuries                        | 7 (5 to 9)     | 7 (5 to 9)     | 1.6% (-4.6% to 7.3%)      |
| 42 | Bangladesh | Other unintentional injuries                    | 11 (7 to 18)   | 11 (7 to 18)   | 3.6% (-2.9% to 9.4%)      |
| 43 | Bangladesh | Pedestrian road injuries                        | 31 (23 to 39)  | 32 (24 to 43)  | 6.3% (-2.1% to 15%)       |
| 44 | Bangladesh | Physical violence by firearm                    | 0 (0 to 0)     | 0 (0 to 0)     | 47.5% (24% to 73.2%)      |
| 45 |            |                                                 |                |                |                           |
| 46 |            |                                                 |                |                |                           |

|    |            |                                                 |               |               |                           |
|----|------------|-------------------------------------------------|---------------|---------------|---------------------------|
| 1  |            |                                                 |               |               |                           |
| 2  | Bangladesh | Physical violence by other means                | 18 (13 to 25) | 17 (13 to 25) | -1.5% (-7.7% to 4.7%)     |
| 3  | Bangladesh | Physical violence by sharp object               | 1 (0 to 1)    | 1 (0 to 1)    | -7.7% (-16.3% to 2.1%)    |
| 4  | Bangladesh | Poisoning by carbon monoxide                    | 0 (0 to 0)    | 0 (0 to 0)    | 16.6% (3% to 32.7%)       |
| 5  | Bangladesh | Poisoning by other means                        | 0 (0 to 0)    | 0 (0 to 0)    | -10.2% (-17.3% to -3%)    |
| 6  | Bangladesh | Pulmonary aspiration and foreign body in airway | 1 (0 to 1)    | 0 (0 to 1)    | -38.4% (-46.9% to -28.7%) |
| 7  | Bangladesh | Self-harm by firearm                            | 0 (0 to 0)    | 0 (0 to 0)    | -12.5% (-24.6% to 1.3%)   |
| 8  | Bangladesh | Self-harm by other specified means              | 2 (1 to 3)    | 1 (1 to 2)    | -38.4% (-43.7% to -33.4%) |
| 9  | Bangladesh | Unintentional firearm injuries                  | 1 (0 to 1)    | 1 (0 to 1)    | 2.2% (-8.7% to 12.1%)     |
| 10 | Bangladesh | Venomous animal contact                         | 4 (2 to 9)    | 5 (2 to 10)   | 4.5% (-3.7% to 13.7%)     |
| 11 | Barbados   | Adverse effects of medical treatment            | 0 (0 to 0)    | 0 (0 to 0)    | 0% (0% to 0%)             |
| 12 | Barbados   | Conflict and terrorism                          | 0 (0 to 0)    | 0 (0 to 0)    | NA                        |
| 13 | Barbados   | Cyclist road injuries                           | 29 (21 to 40) | 26 (18 to 35) | -11.8% (-20.7% to -2.2%)  |
| 14 | Barbados   | Drowning                                        | 0 (0 to 1)    | 0 (0 to 1)    | 20% (6.4% to 34.3%)       |
| 15 | Barbados   | Environmental heat and cold exposure            | 11 (8 to 15)  | 12 (8 to 16)  | 6.1% (0.9% to 11.2%)      |
| 16 | Barbados   | Executions and police conflict                  | 0 (0 to 0)    | 0 (0 to 0)    | NA                        |
| 17 | Barbados   | Exposure to forces of nature                    | 0 (0 to 0)    | 0 (0 to 0)    | NA                        |
| 18 | Barbados   | Falls                                           | 44 (34 to 57) | 66 (51 to 85) | 48.3% (42.6% to 54.1%)    |
| 19 | Barbados   | Fire, heat, and hot substances                  | 4 (2 to 7)    | 4 (2 to 6)    | -8% (-14.3% to -1.2%)     |
| 20 | Barbados   | Foreign body in eyes                            | 0 (0 to 0)    | 0 (0 to 0)    | 0.8% (0.3% to 1.5%)       |
| 21 | Barbados   | Foreign body in other body part                 | 1 (1 to 3)    | 1 (1 to 3)    | -1.6% (-6.6% to 3.1%)     |
| 22 | Barbados   | Motor vehicle road injuries                     | 36 (26 to 46) | 28 (21 to 35) | -22.4% (-30.1% to -13.8%) |
| 23 | Barbados   | Motorcyclist road injuries                      | 15 (11 to 20) | 14 (11 to 19) | -5.5% (-17.2% to 7.1%)    |
| 24 | Barbados   | Non-venomous animal contact                     | 3 (1 to 5)    | 3 (1 to 5)    | -3.2% (-8.4% to 3.3%)     |
| 25 | Barbados   | Other exposure to mechanical forces             | 32 (18 to 55) | 38 (21 to 62) | 16.1% (9.8% to 22.5%)     |
| 26 | Barbados   | Other road injuries                             | 4 (2 to 7)    | 4 (2 to 6)    | -9.8% (-19.5% to 1.3%)    |
| 27 | Barbados   | Other transport injuries                        | 4 (3 to 6)    | 4 (3 to 6)    | -0.9% (-6.5% to 5.5%)     |
| 28 | Barbados   | Other unintentional injuries                    | 14 (8 to 23)  | 13 (8 to 22)  | -1.8% (-6.8% to 3.7%)     |
| 29 | Barbados   | Pedestrian road injuries                        | 15 (11 to 19) | 11 (8 to 14)  | -26.4% (-34% to -17.6%)   |
| 30 | Barbados   | Physical violence by firearm                    | 1 (1 to 1)    | 2 (1 to 2)    | 104.2% (77.3% to 139.1%)  |
| 31 | Barbados   | Physical violence by other means                | 14 (10 to 20) | 15 (10 to 22) | 6.3% (-3.2% to 16.2%)     |
| 32 | Barbados   | Physical violence by sharp object               | 5 (3 to 7)    | 5 (3 to 8)    | 16.7% (2.6% to 33.1%)     |
| 33 | Barbados   | Poisoning by carbon monoxide                    | 0 (0 to 0)    | 0 (0 to 0)    | 21.8% (6.4% to 37.1%)     |
| 34 | Barbados   | Poisoning by other means                        | 0 (0 to 0)    | 0 (0 to 0)    | -13.2% (-23.2% to -4.7%)  |
| 35 | Barbados   | Pulmonary aspiration and foreign body in airway | 0 (0 to 1)    | 0 (0 to 1)    | -11.7% (-19.5% to -3.7%)  |
| 36 | Barbados   | Self-harm by firearm                            | 0 (0 to 0)    | 0 (0 to 0)    | 1.9% (-8.3% to 13.3%)     |
| 37 | Barbados   | Self-harm by other specified means              | 0 (0 to 1)    | 0 (0 to 1)    | -11.5% (-18.9% to -4.1%)  |
| 38 | Barbados   | Unintentional firearm injuries                  | 5 (3 to 8)    | 5 (3 to 8)    | -11.3% (-21.3% to -1.6%)  |
| 39 | Barbados   | Venomous animal contact                         | 5 (2 to 8)    | 4 (2 to 8)    | -3.1% (-7.5% to 2.1%)     |
| 40 | Belarus    | Adverse effects of medical treatment            | 0 (0 to 0)    | 0 (0 to 0)    | 0% (0% to 0%)             |
| 41 | Belarus    | Conflict and terrorism                          | 0 (0 to 0)    | 0 (0 to 0)    | NA                        |
| 42 | Belarus    | Cyclist road injuries                           | 61 (43 to 82) | 44 (31 to 61) | -27.3% (-36.4% to -17%)   |
| 43 | Belarus    | Drowning                                        | 1 (1 to 2)    | 1 (1 to 2)    | -1.5% (-11.5% to 9.6%)    |
| 44 | Belarus    | Environmental heat and cold exposure            | 12 (9 to 17)  | 10 (7 to 14)  | -15.7% (-24.4% to -4.5%)  |
| 45 |            |                                                 |               |               |                           |
| 46 |            |                                                 |               |               |                           |

|    |         |                                                 |                  |                  |                           |
|----|---------|-------------------------------------------------|------------------|------------------|---------------------------|
| 1  |         |                                                 |                  |                  |                           |
| 2  | Belarus | Executions and police conflict                  | 0 (0 to 0)       | 0 (0 to 0)       | NA                        |
| 3  | Belarus | Exposure to forces of nature                    | 0 (0 to 0)       | 0 (0 to 0)       | NA                        |
| 4  | Belarus | Falls                                           | 268 (209 to 342) | 314 (248 to 406) | 17.4% (12.1% to 23.4%)    |
| 5  | Belarus | Fire, heat, and hot substances                  | 5 (3 to 8)       | 4 (3 to 7)       | -7.5% (-14.1% to -0.8%)   |
| 6  | Belarus | Foreign body in eyes                            | 0 (0 to 0)       | 0 (0 to 0)       | 0.8% (0.4% to 1.3%)       |
| 7  | Belarus | Foreign body in other body part                 | 2 (1 to 4)       | 2 (1 to 4)       | -0.1% (-6.6% to 5.8%)     |
| 8  | Belarus | Motor vehicle road injuries                     | 155 (120 to 196) | 108 (83 to 137)  | -30% (-39.8% to -20.3%)   |
| 9  | Belarus | Motorcyclist road injuries                      | 24 (18 to 32)    | 15 (11 to 20)    | -39% (-48.8% to -28.1%)   |
| 10 | Belarus | Non-venomous animal contact                     | 5 (3 to 8)       | 4 (2 to 7)       | -10.6% (-15.5% to -6%)    |
| 11 | Belarus | Other exposure to mechanical forces             | 81 (50 to 128)   | 77 (47 to 121)   | -5% (-11.3% to 0.7%)      |
| 12 | Belarus | Other road injuries                             | 3 (1 to 4)       | 2 (1 to 4)       | -17.8% (-28% to -6.7%)    |
| 13 | Belarus | Other transport injuries                        | 6 (4 to 8)       | 6 (4 to 8)       | 3.2% (-1.4% to 8.2%)      |
| 14 | Belarus | Other unintentional injuries                    | 27 (17 to 44)    | 25 (15 to 40)    | -8.7% (-14.9% to -2.8%)   |
| 15 | Belarus | Pedestrian road injuries                        | 78 (61 to 98)    | 37 (28 to 48)    | -52.3% (-58.4% to -45.8%) |
| 16 | Belarus | Physical violence by firearm                    | 0 (0 to 0)       | 0 (0 to 1)       | 50.4% (25.8% to 78.8%)    |
| 17 | Belarus | Physical violence by other means                | 34 (25 to 48)    | 27 (19 to 37)    | -20.4% (-28.7% to -10.5%) |
| 18 | Belarus | Physical violence by sharp object               | 4 (3 to 7)       | 3 (2 to 5)       | -33.4% (-43.4% to -22.7%) |
| 19 | Belarus | Poisoning by carbon monoxide                    | 0 (0 to 0)       | 0 (0 to 0)       | -17.5% (-29.9% to -4.4%)  |
| 20 | Belarus | Poisoning by other means                        | 0 (0 to 1)       | 0 (0 to 1)       | -10.2% (-20.5% to -0.8%)  |
| 21 | Belarus | Pulmonary aspiration and foreign body in airway | 1 (1 to 2)       | 1 (1 to 2)       | -14.4% (-20.8% to -7.2%)  |
| 22 | Belarus | Self-harm by firearm                            | 1 (0 to 1)       | 1 (0 to 1)       | 0.5% (-14.5% to 15.8%)    |
| 23 | Belarus | Self-harm by other specified means              | 5 (3 to 7)       | 5 (3 to 7)       | -0.8% (-7.8% to 6.9%)     |
| 24 | Belarus | Unintentional firearm injuries                  | 1 (1 to 2)       | 1 (1 to 2)       | 3.8% (-7.7% to 15.5%)     |
| 25 | Belarus | Venomous animal contact                         | 4 (2 to 7)       | 3 (1 to 6)       | -10.7% (-16.4% to -5.6%)  |
| 26 | Belgium | Adverse effects of medical treatment            | 0 (0 to 0)       | 0 (0 to 0)       | 0% (0% to 0%)             |
| 27 | Belgium | Conflict and terrorism                          | 1 (0 to 1)       | 0 (0 to 0)       | NA                        |
| 28 | Belgium | Cyclist road injuries                           | 27 (19 to 36)    | 21 (15 to 28)    | -24.6% (-36.2% to -12.9%) |
| 29 | Belgium | Drowning                                        | 0 (0 to 0)       | 0 (0 to 0)       | 50.1% (36.8% to 65.1%)    |
| 30 | Belgium | Environmental heat and cold exposure            | 2 (1 to 2)       | 2 (1 to 3)       | 0% (-5.2% to 4.5%)        |
| 31 | Belgium | Executions and police conflict                  | 0 (0 to 0)       | 0 (0 to 0)       | NA                        |
| 32 | Belgium | Exposure to forces of nature                    | 0 (0 to 0)       | 0 (0 to 0)       | NA                        |
| 33 | Belgium | Falls                                           | 285 (223 to 364) | 372 (293 to 472) | 30.5% (26.3% to 35%)      |
| 34 | Belgium | Fire, heat, and hot substances                  | 2 (1 to 4)       | 2 (1 to 4)       | -13.4% (-19.6% to -8.1%)  |
| 35 | Belgium | Foreign body in eyes                            | 0 (0 to 0)       | 0 (0 to 0)       | 0.3% (0% to 0.9%)         |
| 36 | Belgium | Foreign body in other body part                 | 1 (1 to 3)       | 1 (1 to 3)       | 2.1% (-2.9% to 7.3%)      |
| 37 | Belgium | Motor vehicle road injuries                     | 49 (39 to 62)    | 24 (18 to 31)    | -51.9% (-58.6% to -44.6%) |
| 38 | Belgium | Motorcyclist road injuries                      | 10 (8 to 14)     | 10 (7 to 13)     | -6.3% (-22% to 11.9%)     |
| 39 | Belgium | Non-venomous animal contact                     | 3 (2 to 5)       | 3 (1 to 5)       | -8.4% (-12.6% to -4.1%)   |
| 40 | Belgium | Other exposure to mechanical forces             | 49 (30 to 78)    | 46 (28 to 73)    | -5.7% (-12.2% to -0.2%)   |
| 41 | Belgium | Other road injuries                             | 1 (1 to 2)       | 1 (1 to 2)       | -11.9% (-26.3% to 2.7%)   |
| 42 | Belgium | Other transport injuries                        | 5 (4 to 7)       | 5 (4 to 7)       | 9.1% (4.1% to 13.9%)      |
| 43 | Belgium | Other unintentional injuries                    | 26 (17 to 41)    | 24 (15 to 39)    | -6.3% (-11.2% to -1.1%)   |
| 44 | Belgium | Pedestrian road injuries                        | 18 (14 to 23)    | 7 (5 to 9)       | -63.4% (-69.7% to -56.7%) |
| 45 |         |                                                 |                  |                  |                           |
| 46 |         |                                                 |                  |                  |                           |

|    |         |                                                 |               |               |                           |
|----|---------|-------------------------------------------------|---------------|---------------|---------------------------|
| 1  |         |                                                 |               |               |                           |
| 2  | Belgium | Physical violence by firearm                    | 1 (0 to 1)    | 1 (0 to 1)    | 10.8% (-1.2% to 25.5%)    |
| 3  | Belgium | Physical violence by other means                | 20 (14 to 28) | 17 (12 to 25) | -12.7% (-18.9% to -6.7%)  |
| 4  | Belgium | Physical violence by sharp object               | 2 (1 to 3)    | 2 (1 to 3)    | -18.1% (-26.4% to -9.4%)  |
| 5  | Belgium | Poisoning by carbon monoxide                    | 0 (0 to 0)    | 0 (0 to 0)    | -23.6% (-31.8% to -14.8%) |
| 6  | Belgium | Poisoning by other means                        | 0 (0 to 1)    | 0 (0 to 0)    | -29.2% (-35.3% to -22.5%) |
| 7  | Belgium | Pulmonary aspiration and foreign body in airway | 1 (0 to 1)    | 1 (0 to 1)    | -15% (-24.4% to -4.3%)    |
| 8  | Belgium | Self-harm by firearm                            | 1 (0 to 1)    | 0 (0 to 1)    | -34.9% (-45.8% to -22%)   |
| 9  | Belgium | Self-harm by other specified means              | 5 (3 to 7)    | 4 (3 to 7)    | -6.1% (-11.5% to -0.1%)   |
| 10 | Belgium | Unintentional firearm injuries                  | 1 (0 to 2)    | 1 (0 to 2)    | -1% (-9.9% to 8.1%)       |
| 11 | Belgium | Venomous animal contact                         | 1 (0 to 2)    | 1 (0 to 2)    | -9% (-14.5% to -2.2%)     |
| 12 | Belize  | Adverse effects of medical treatment            | 0 (0 to 0)    | 0 (0 to 0)    | 0% (0% to 0%)             |
| 13 | Belize  | Conflict and terrorism                          | 19 (7 to 43)  | 0 (0 to 0)    | NA                        |
| 14 | Belize  | Cyclist road injuries                           | 44 (33 to 58) | 35 (26 to 47) | -20.7% (-29.3% to -10%)   |
| 15 | Belize  | Drowning                                        | 0 (0 to 1)    | 0 (0 to 1)    | 21.6% (11.7% to 33.9%)    |
| 16 | Belize  | Environmental heat and cold exposure            | 10 (7 to 14)  | 10 (7 to 15)  | 4.7% (0.4% to 9.5%)       |
| 17 | Belize  | Executions and police conflict                  | 0 (0 to 0)    | 0 (0 to 0)    | NA                        |
| 18 | Belize  | Exposure to forces of nature                    | 0 (0 to 0)    | 0 (0 to 0)    | NA                        |
| 19 | Belize  | Falls                                           | 41 (32 to 53) | 64 (50 to 84) | 56% (50% to 62.1%)        |
| 20 | Belize  | Fire, heat, and hot substances                  | 3 (2 to 6)    | 3 (2 to 6)    | 4.7% (-3% to 14.1%)       |
| 21 | Belize  | Foreign body in eyes                            | 0 (0 to 0)    | 0 (0 to 0)    | -0.5% (-1% to 0%)         |
| 22 | Belize  | Foreign body in other body part                 | 1 (1 to 3)    | 1 (1 to 3)    | -2% (-6.9% to 3.6%)       |
| 23 | Belize  | Motor vehicle road injuries                     | 38 (28 to 49) | 35 (26 to 45) | -6.8% (-17% to 3.6%)      |
| 24 | Belize  | Motorcyclist road injuries                      | 15 (11 to 19) | 23 (17 to 30) | 53.9% (31.8% to 78.5%)    |
| 25 | Belize  | Non-venomous animal contact                     | 3 (2 to 6)    | 4 (2 to 7)    | 9.9% (1.8% to 19.8%)      |
| 26 | Belize  | Other exposure to mechanical forces             | 42 (25 to 69) | 51 (30 to 83) | 22.3% (13.3% to 32.1%)    |
| 27 | Belize  | Other road injuries                             | 3 (2 to 6)    | 4 (2 to 6)    | 6% (-5.6% to 18.1%)       |
| 28 | Belize  | Other transport injuries                        | 6 (4 to 8)    | 7 (5 to 9)    | 10.2% (1.5% to 18.1%)     |
| 29 | Belize  | Other unintentional injuries                    | 12 (8 to 20)  | 13 (8 to 21)  | 3% (-3.2% to 8.9%)        |
| 30 | Belize  | Pedestrian road injuries                        | 17 (13 to 22) | 15 (11 to 19) | -10.7% (-19.3% to 0%)     |
| 31 | Belize  | Physical violence by firearm                    | 1 (0 to 1)    | 3 (2 to 4)    | 373.2% (300.1% to 481%)   |
| 32 | Belize  | Physical violence by other means                | 10 (7 to 15)  | 19 (14 to 29) | 89.3% (69% to 115.7%)     |
| 33 | Belize  | Physical violence by sharp object               | 4 (3 to 6)    | 8 (5 to 12)   | 90.2% (65.1% to 123.1%)   |
| 34 | Belize  | Poisoning by carbon monoxide                    | 0 (0 to 0)    | 0 (0 to 0)    | 18.1% (-0.3% to 37.9%)    |
| 35 | Belize  | Poisoning by other means                        | 0 (0 to 0)    | 0 (0 to 0)    | -29.6% (-40.8% to -17.9%) |
| 36 | Belize  | Pulmonary aspiration and foreign body in airway | 1 (0 to 1)    | 0 (0 to 1)    | -24.4% (-32.1% to -15.2%) |
| 37 | Belize  | Self-harm by firearm                            | 0 (0 to 0)    | 0 (0 to 1)    | 34% (19.3% to 51.3%)      |
| 38 | Belize  | Self-harm by other specified means              | 0 (0 to 1)    | 0 (0 to 1)    | 7.1% (-2.7% to 16.7%)     |
| 39 | Belize  | Unintentional firearm injuries                  | 8 (5 to 11)   | 8 (5 to 12)   | 10.4% (-1.9% to 22%)      |
| 40 | Belize  | Venomous animal contact                         | 6 (3 to 10)   | 7 (3 to 12)   | 20.8% (11.9% to 32.7%)    |
| 41 | Benin   | Adverse effects of medical treatment            | 0 (0 to 0)    | 0 (0 to 0)    | 0% (0% to 0%)             |
| 42 | Benin   | Conflict and terrorism                          | 0 (0 to 0)    | 0 (0 to 0)    | NA                        |
| 43 | Benin   | Cyclist road injuries                           | 30 (19 to 44) | 30 (19 to 44) | 0.9% (-7.3% to 9.9%)      |
| 44 | Benin   | Drowning                                        | 0 (0 to 0)    | 0 (0 to 0)    | -15.3% (-22% to -8.2%)    |
| 45 |         |                                                 |               |               |                           |
| 46 |         |                                                 |               |               |                           |

|    |         |                                                 |                |                |                           |
|----|---------|-------------------------------------------------|----------------|----------------|---------------------------|
| 1  |         |                                                 |                |                |                           |
| 2  | Benin   | Environmental heat and cold exposure            | 0 (0 to 1)     | 0 (0 to 1)     | 3.9% (-1.4% to 10%)       |
| 3  | Benin   | Executions and police conflict                  | 0 (0 to 0)     | 0 (0 to 0)     | NA                        |
| 4  | Benin   | Exposure to forces of nature                    | 0 (0 to 0)     | 0 (0 to 0)     | NA                        |
| 5  | Benin   | Falls                                           | 18 (12 to 27)  | 20 (13 to 29)  | 11% (6.5% to 15.2%)       |
| 6  | Benin   | Fire, heat, and hot substances                  | 0 (0 to 0)     | 0 (0 to 0)     | -6.7% (-12.1% to -1.2%)   |
| 7  | Benin   | Foreign body in eyes                            | 0 (0 to 0)     | 0 (0 to 0)     | 0.1% (-0.3% to 0.8%)      |
| 8  | Benin   | Foreign body in other body part                 | 3 (1 to 8)     | 3 (1 to 7)     | -0.7% (-5.3% to 3.6%)     |
| 9  | Benin   | Motor vehicle road injuries                     | 43 (30 to 63)  | 54 (37 to 75)  | 25.4% (16.1% to 36.3%)    |
| 10 | Benin   | Motorcyclist road injuries                      | 47 (35 to 62)  | 37 (27 to 50)  | -22.3% (-28.5% to -16.2%) |
| 11 | Benin   | Non-venomous animal contact                     | 3 (1 to 5)     | 3 (1 to 5)     | -2.4% (-6.7% to 2.1%)     |
| 12 | Benin   | Other exposure to mechanical forces             | 26 (13 to 46)  | 23 (11 to 43)  | -8.9% (-14.1% to -3.6%)   |
| 13 | Benin   | Other road injuries                             | 2 (1 to 3)     | 2 (1 to 3)     | 11.6% (0.9% to 23.3%)     |
| 14 | Benin   | Other transport injuries                        | 4 (3 to 5)     | 3 (2 to 4)     | -10.7% (-16.8% to -3.5%)  |
| 15 | Benin   | Other unintentional injuries                    | 3 (2 to 5)     | 2 (1 to 4)     | -12.7% (-17.9% to -7.1%)  |
| 16 | Benin   | Pedestrian road injuries                        | 39 (28 to 52)  | 47 (34 to 63)  | 21.7% (13.7% to 30.8%)    |
| 17 | Benin   | Physical violence by firearm                    | 0 (0 to 0)     | 0 (0 to 0)     | 39.5% (24.3% to 56.8%)    |
| 18 | Benin   | Physical violence by other means                | 8 (5 to 11)    | 9 (6 to 13)    | 17% (10.1% to 23.4%)      |
| 19 | Benin   | Physical violence by sharp object               | 2 (1 to 3)     | 2 (1 to 4)     | 16.2% (8.3% to 24.6%)     |
| 20 | Benin   | Poisoning by carbon monoxide                    | 0 (0 to 0)     | 0 (0 to 0)     | 9.4% (-1.8% to 21.1%)     |
| 21 | Benin   | Poisoning by other means                        | 0 (0 to 0)     | 0 (0 to 0)     | -15.9% (-23.4% to -8.2%)  |
| 22 | Benin   | Pulmonary aspiration and foreign body in airway | 0 (0 to 0)     | 0 (0 to 0)     | -12.8% (-21.2% to -3.8%)  |
| 23 | Benin   | Self-harm by firearm                            | 0 (0 to 0)     | 0 (0 to 0)     | 20.7% (12.5% to 30.2%)    |
| 24 | Benin   | Self-harm by other specified means              | 0 (0 to 0)     | 0 (0 to 0)     | 10.9% (4.8% to 16.9%)     |
| 25 | Benin   | Unintentional firearm injuries                  | 1 (0 to 2)     | 1 (0 to 2)     | -12.1% (-20.2% to -4.1%)  |
| 26 | Benin   | Venomous animal contact                         | 0 (0 to 1)     | 0 (0 to 1)     | -2.2% (-8.7% to 5.4%)     |
| 27 | Bermuda | Adverse effects of medical treatment            | 0 (0 to 0)     | 0 (0 to 0)     | 0% (0% to 0%)             |
| 28 | Bermuda | Conflict and terrorism                          | 0 (0 to 0)     | 0 (0 to 0)     | NA                        |
| 29 | Bermuda | Cyclist road injuries                           | 23 (14 to 36)  | 18 (11 to 29)  | -21% (-30.3% to -9.4%)    |
| 30 | Bermuda | Drowning                                        | 0 (0 to 0)     | 0 (0 to 0)     | 48.3% (33.7% to 65.4%)    |
| 31 | Bermuda | Environmental heat and cold exposure            | 1 (1 to 3)     | 1 (1 to 3)     | 2.4% (-3% to 8.2%)        |
| 32 | Bermuda | Executions and police conflict                  | 0 (0 to 0)     | 0 (0 to 0)     | NA                        |
| 33 | Bermuda | Exposure to forces of nature                    | 0 (0 to 0)     | 0 (0 to 0)     | NA                        |
| 34 | Bermuda | Falls                                           | 27 (17 to 40)  | 40 (26 to 62)  | 51.9% (44.9% to 58.5%)    |
| 35 | Bermuda | Fire, heat, and hot substances                  | 1 (0 to 1)     | 1 (0 to 1)     | 22.8% (17.8% to 28.9%)    |
| 36 | Bermuda | Foreign body in eyes                            | 0 (0 to 0)     | 0 (0 to 0)     | 0.5% (0% to 1.1%)         |
| 37 | Bermuda | Foreign body in other body part                 | 1 (1 to 3)     | 2 (1 to 3)     | 6.1% (-1.6% to 12.5%)     |
| 38 | Bermuda | Motor vehicle road injuries                     | 22 (14 to 33)  | 17 (10 to 25)  | -23.4% (-32.9% to -13.2%) |
| 39 | Bermuda | Motorcyclist road injuries                      | 69 (53 to 88)  | 48 (37 to 62)  | -30.5% (-37.5% to -22.3%) |
| 40 | Bermuda | Non-venomous animal contact                     | 2 (1 to 4)     | 2 (1 to 3)     | -3.5% (-8.2% to 1.8%)     |
| 41 | Bermuda | Other exposure to mechanical forces             | 56 (28 to 103) | 68 (33 to 126) | 21.8% (14.9% to 28.5%)    |
| 42 | Bermuda | Other road injuries                             | 6 (3 to 12)    | 5 (2 to 9)     | -20.7% (-29% to -10.6%)   |
| 43 | Bermuda | Other transport injuries                        | 3 (2 to 4)     | 3 (2 to 4)     | 8.8% (2.4% to 17.4%)      |
| 44 | Bermuda | Other unintentional injuries                    | 5 (3 to 9)     | 5 (3 to 10)    | 12.1% (4.5% to 19.2%)     |
| 45 |         |                                                 |                |                |                           |
| 46 |         |                                                 |                |                |                           |



|    |                                  |                                                 |               |                 |                           |
|----|----------------------------------|-------------------------------------------------|---------------|-----------------|---------------------------|
| 1  |                                  |                                                 |               |                 |                           |
| 2  | Bermuda                          | Pedestrian road injuries                        | 16 (10 to 23) | 13 (8 to 20)    | -16.8% (-25.8% to -6.5%)  |
| 3  | Bermuda                          | Physical violence by firearm                    | 1 (0 to 1)    | 1 (1 to 2)      | 82.6% (62.6% to 107.4%)   |
| 4  | Bermuda                          | Physical violence by other means                | 11 (7 to 16)  | 11 (7 to 17)    | -0.4% (-7.4% to 6.4%)     |
| 5  | Bermuda                          | Physical violence by sharp object               | 3 (2 to 6)    | 3 (1 to 6)      | -4.5% (-14.1% to 5.2%)    |
| 6  | Bermuda                          | Poisoning by carbon monoxide                    | 0 (0 to 0)    | 0 (0 to 0)      | -1% (-14.8% to 13.7%)     |
| 7  | Bermuda                          | Poisoning by other means                        | 0 (0 to 0)    | 0 (0 to 0)      | -26.1% (-38% to -13%)     |
| 8  | Bermuda                          | Pulmonary aspiration and foreign body in airway | 0 (0 to 0)    | 0 (0 to 0)      | 2.8% (-8.1% to 14.3%)     |
| 9  | Bermuda                          | Self-harm by firearm                            | 0 (0 to 0)    | 0 (0 to 0)      | -3.7% (-10.1% to 3.2%)    |
| 10 | Bermuda                          | Self-harm by other specified means              | 0 (0 to 0)    | 0 (0 to 0)      | -10.9% (-20.3% to -1.4%)  |
| 11 | Bermuda                          | Unintentional firearm injuries                  | 2 (1 to 4)    | 3 (1 to 6)      | 34.2% (22.6% to 46.6%)    |
| 12 | Bermuda                          | Venomous animal contact                         | 1 (0 to 3)    | 1 (0 to 3)      | -3.3% (-8.4% to 2.7%)     |
| 13 | Bhutan                           | Adverse effects of medical treatment            | 0 (0 to 0)    | 0 (0 to 0)      | 0% (0% to 0%)             |
| 14 | Bhutan                           | Conflict and terrorism                          | 0 (0 to 0)    | 0 (0 to 0)      | NA                        |
| 15 | Bhutan                           | Cyclist road injuries                           | 73 (53 to 96) | 93 (70 to 122)  | 28.5% (19.4% to 38.5%)    |
| 16 | Bhutan                           | Drowning                                        | 0 (0 to 0)    | 0 (0 to 1)      | 14.3% (-0.4% to 27.7%)    |
| 17 | Bhutan                           | Environmental heat and cold exposure            | 2 (1 to 3)    | 2 (2 to 3)      | 7% (2.6% to 11.6%)        |
| 18 | Bhutan                           | Executions and police conflict                  | 0 (0 to 0)    | 0 (0 to 0)      | NA                        |
| 19 | Bhutan                           | Exposure to forces of nature                    | 0 (0 to 0)    | 0 (0 to 0)      | NA                        |
| 20 | Bhutan                           | Falls                                           | 60 (48 to 76) | 118 (95 to 150) | 96.7% (86.9% to 108%)     |
| 21 | Bhutan                           | Fire, heat, and hot substances                  | 1 (0 to 1)    | 1 (0 to 1)      | -8.5% (-15.4% to -0.9%)   |
| 22 | Bhutan                           | Foreign body in eyes                            | 0 (0 to 0)    | 0 (0 to 0)      | 0.6% (-0.1% to 1.7%)      |
| 23 | Bhutan                           | Foreign body in other body part                 | 1 (1 to 2)    | 1 (1 to 2)      | 1.9% (-4.1% to 8.5%)      |
| 24 | Bhutan                           | Motor vehicle road injuries                     | 44 (33 to 58) | 51 (37 to 68)   | 16.2% (6.4% to 25.9%)     |
| 25 | Bhutan                           | Motorcyclist road injuries                      | 32 (24 to 41) | 31 (23 to 41)   | -2.3% (-11.3% to 6.8%)    |
| 26 | Bhutan                           | Non-venomous animal contact                     | 10 (6 to 18)  | 8 (5 to 14)     | -22.7% (-28% to -17%)     |
| 27 | Bhutan                           | Other exposure to mechanical forces             | 30 (19 to 48) | 26 (16 to 41)   | -14.1% (-20.1% to -8%)    |
| 28 | Bhutan                           | Other road injuries                             | 2 (1 to 3)    | 2 (1 to 4)      | 33.3% (22.8% to 46.8%)    |
| 29 | Bhutan                           | Other transport injuries                        | 5 (4 to 7)    | 5 (4 to 7)      | -1.2% (-9.1% to 6.9%)     |
| 30 | Bhutan                           | Other unintentional injuries                    | 10 (7 to 16)  | 11 (7 to 17)    | 3.6% (-1.2% to 8.4%)      |
| 31 | Bhutan                           | Pedestrian road injuries                        | 50 (37 to 63) | 42 (31 to 54)   | -15.5% (-22.1% to -8.4%)  |
| 32 | Bhutan                           | Physical violence by firearm                    | 0 (0 to 0)    | 0 (0 to 0)      | 63.6% (37.2% to 91.7%)    |
| 33 | Bhutan                           | Physical violence by other means                | 20 (14 to 28) | 20 (14 to 28)   | -0.4% (-6.3% to 5.4%)     |
| 34 | Bhutan                           | Physical violence by sharp object               | 1 (0 to 1)    | 1 (0 to 1)      | -11.7% (-19.9% to -3.5%)  |
| 35 | Bhutan                           | Poisoning by carbon monoxide                    | 0 (0 to 0)    | 0 (0 to 0)      | 45.3% (28.7% to 64.3%)    |
| 36 | Bhutan                           | Poisoning by other means                        | 0 (0 to 0)    | 0 (0 to 0)      | 0.1% (-8.7% to 9.1%)      |
| 37 | Bhutan                           | Pulmonary aspiration and foreign body in airway | 0 (0 to 1)    | 0 (0 to 1)      | -27.5% (-34.7% to -20.1%) |
| 38 | Bhutan                           | Self-harm by firearm                            | 0 (0 to 0)    | 0 (0 to 0)      | 20.8% (5.1% to 40.5%)     |
| 39 | Bhutan                           | Self-harm by other specified means              | 1 (1 to 2)    | 1 (1 to 2)      | 1.4% (-4.5% to 7.8%)      |
| 40 | Bhutan                           | Unintentional firearm injuries                  | 1 (1 to 2)    | 1 (0 to 1)      | -40.9% (-48.3% to -33.9%) |
| 41 | Bhutan                           | Venomous animal contact                         | 4 (2 to 9)    | 4 (1 to 8)      | -9.3% (-16.8% to -0.4%)   |
| 42 | Bolivia (Plurinational State of) | Adverse effects of medical treatment            | 0 (0 to 0)    | 0 (0 to 0)      | 0% (0% to 0%)             |
| 43 | Bolivia (Plurinational State of) | Conflict and terrorism                          | 1 (0 to 1)    | 0 (0 to 0)      | NA                        |
| 44 | Bolivia (Plurinational State of) | Cyclist road injuries                           | 11 (7 to 15)  | 9 (6 to 13)     | -14.5% (-22.5% to -6.1%)  |
| 45 |                                  |                                                 |               |                 |                           |
| 46 |                                  |                                                 |               |                 |                           |

|    |                                  |                                                 |                  |                  |                           |
|----|----------------------------------|-------------------------------------------------|------------------|------------------|---------------------------|
| 1  |                                  |                                                 |                  |                  |                           |
| 2  | Bolivia (Plurinational State of) | Drowning                                        | 0 (0 to 1)       | 0 (0 to 0)       | -22.4% (-30.2% to -13.1%) |
| 3  | Bolivia (Plurinational State of) | Environmental heat and cold exposure            | 8 (6 to 11)      | 8 (6 to 12)      | 0.5% (-3.5% to 5.3%)      |
| 4  | Bolivia (Plurinational State of) | Executions and police conflict                  | 0 (0 to 0)       | 0 (0 to 0)       | NA                        |
| 5  | Bolivia (Plurinational State of) | Exposure to forces of nature                    | 0 (0 to 0)       | 2 (1 to 3)       | NA                        |
| 6  | Bolivia (Plurinational State of) | Falls                                           | 60 (47 to 77)    | 79 (61 to 102)   | 32% (25.9% to 38.4%)      |
| 7  | Bolivia (Plurinational State of) | Fire, heat, and hot substances                  | 3 (2 to 6)       | 3 (2 to 5)       | -21.1% (-28.9% to -13.7%) |
| 8  | Bolivia (Plurinational State of) | Foreign body in eyes                            | 0 (0 to 0)       | 0 (0 to 0)       | 0.8% (0.3% to 1.3%)       |
| 9  | Bolivia (Plurinational State of) | Foreign body in other body part                 | 2 (1 to 5)       | 2 (1 to 4)       | -10.9% (-18.8% to -4.1%)  |
| 10 | Bolivia (Plurinational State of) | Motor vehicle road injuries                     | 24 (18 to 31)    | 21 (16 to 26)    | -13.3% (-20.7% to -5.7%)  |
| 11 | Bolivia (Plurinational State of) | Motorcyclist road injuries                      | 8 (6 to 10)      | 7 (5 to 9)       | -6.1% (-14.9% to 4.1%)    |
| 12 | Bolivia (Plurinational State of) | Non-venomous animal contact                     | 3 (2 to 6)       | 3 (2 to 5)       | -7.7% (-13.4% to -2.5%)   |
| 13 | Bolivia (Plurinational State of) | Other exposure to mechanical forces             | 34 (20 to 54)    | 33 (20 to 53)    | -2.5% (-9.9% to 5.4%)     |
| 14 | Bolivia (Plurinational State of) | Other road injuries                             | 2 (1 to 4)       | 2 (1 to 4)       | -9.5% (-18.4% to 0.2%)    |
| 15 | Bolivia (Plurinational State of) | Other transport injuries                        | 5 (4 to 6)       | 5 (4 to 6)       | -8.7% (-13.9% to -3.8%)   |
| 16 | Bolivia (Plurinational State of) | Other unintentional injuries                    | 24 (16 to 37)    | 16 (11 to 25)    | -32.6% (-36.9% to -28.1%) |
| 17 | Bolivia (Plurinational State of) | Pedestrian road injuries                        | 18 (14 to 23)    | 12 (9 to 15)     | -35.7% (-41.2% to -29.6%) |
| 18 | Bolivia (Plurinational State of) | Physical violence by firearm                    | 0 (0 to 1)       | 1 (0 to 1)       | 67.6% (43.6% to 97.3%)    |
| 19 | Bolivia (Plurinational State of) | Physical violence by other means                | 8 (6 to 12)      | 8 (6 to 12)      | -4.1% (-10.6% to 3.1%)    |
| 20 | Bolivia (Plurinational State of) | Physical violence by sharp object               | 3 (2 to 4)       | 3 (2 to 4)       | -4.7% (-13.6% to 5.4%)    |
| 21 | Bolivia (Plurinational State of) | Poisoning by carbon monoxide                    | 0 (0 to 0)       | 0 (0 to 0)       | 46.4% (25.1% to 70.9%)    |
| 22 | Bolivia (Plurinational State of) | Poisoning by other means                        | 0 (0 to 0)       | 0 (0 to 0)       | -18.2% (-26.1% to -9.9%)  |
| 23 | Bolivia (Plurinational State of) | Pulmonary aspiration and foreign body in airway | 1 (1 to 3)       | 1 (0 to 1)       | -54.6% (-61.6% to -47.2%) |
| 24 | Bolivia (Plurinational State of) | Self-harm by firearm                            | 0 (0 to 0)       | 0 (0 to 0)       | 23.3% (8.8% to 38.2%)     |
| 25 | Bolivia (Plurinational State of) | Self-harm by other specified means              | 0 (0 to 1)       | 1 (0 to 1)       | 13.6% (6.1% to 22.1%)     |
| 26 | Bolivia (Plurinational State of) | Unintentional firearm injuries                  | 5 (3 to 7)       | 3 (2 to 5)       | -29.7% (-37.6% to -22%)   |
| 27 | Bolivia (Plurinational State of) | Venomous animal contact                         | 6 (3 to 11)      | 6 (3 to 10)      | -8.7% (-13.1% to -4.3%)   |
| 28 | Bosnia and Herzegovina           | Adverse effects of medical treatment            | 0 (0 to 0)       | 0 (0 to 0)       | 0% (0% to 0%)             |
| 29 | Bosnia and Herzegovina           | Conflict and terrorism                          | 47 (19 to 109)   | 0 (0 to 0)       | NA                        |
| 30 | Bosnia and Herzegovina           | Cyclist road injuries                           | 68 (49 to 91)    | 66 (48 to 89)    | -2% (-10.6% to 6.3%)      |
| 31 | Bosnia and Herzegovina           | Drowning                                        | 0 (0 to 0)       | 0 (0 to 1)       | 97.3% (71.1% to 126.3%)   |
| 32 | Bosnia and Herzegovina           | Environmental heat and cold exposure            | 2 (1 to 2)       | 2 (1 to 2)       | 6.1% (0.2% to 12.8%)      |
| 33 | Bosnia and Herzegovina           | Executions and police conflict                  | 0 (0 to 0)       | 0 (0 to 0)       | NA                        |
| 34 | Bosnia and Herzegovina           | Exposure to forces of nature                    | 0 (0 to 0)       | 0 (0 to 0)       | NA                        |
| 35 | Bosnia and Herzegovina           | Falls                                           | 188 (144 to 249) | 237 (179 to 316) | 25.7% (20.5% to 30.8%)    |
| 36 | Bosnia and Herzegovina           | Fire, heat, and hot substances                  | 5 (3 to 8)       | 4 (2 to 7)       | -19% (-24.1% to -14.3%)   |
| 37 | Bosnia and Herzegovina           | Foreign body in eyes                            | 0 (0 to 0)       | 0 (0 to 0)       | 0% (-0.2% to 0.5%)        |
| 38 | Bosnia and Herzegovina           | Foreign body in other body part                 | 3 (1 to 5)       | 2 (1 to 5)       | -4.7% (-9.1% to 0.6%)     |
| 39 | Bosnia and Herzegovina           | Motor vehicle road injuries                     | 69 (51 to 90)    | 83 (62 to 106)   | 20.9% (10.6% to 31.5%)    |
| 40 | Bosnia and Herzegovina           | Motorcyclist road injuries                      | 12 (9 to 17)     | 13 (10 to 18)    | 7.8% (-5.2% to 22.3%)     |
| 41 | Bosnia and Herzegovina           | Non-venomous animal contact                     | 8 (5 to 15)      | 6 (3 to 10)      | -30.2% (-34.6% to -24.7%) |
| 42 | Bosnia and Herzegovina           | Other exposure to mechanical forces             | 149 (92 to 236)  | 137 (84 to 216)  | -8% (-13.9% to -1.7%)     |
| 43 | Bosnia and Herzegovina           | Other road injuries                             | 2 (1 to 3)       | 2 (1 to 3)       | -7.5% (-15.7% to 2%)      |
| 44 | Bosnia and Herzegovina           | Other transport injuries                        | 7 (5 to 9)       | 6 (4 to 8)       | -7.5% (-12.3% to -3.6%)   |
| 45 |                                  |                                                 |                  |                  |                           |
| 46 |                                  |                                                 |                  |                  |                           |

|    |                        |                                                 |               |               |                           |
|----|------------------------|-------------------------------------------------|---------------|---------------|---------------------------|
| 1  |                        |                                                 |               |               |                           |
| 2  | Bosnia and Herzegovina | Other unintentional injuries                    | 34 (21 to 56) | 30 (19 to 50) | -10.4% (-15.8% to -5.6%)  |
| 3  | Bosnia and Herzegovina | Pedestrian road injuries                        | 35 (26 to 45) | 33 (24 to 43) | -6.2% (-13.2% to 1.7%)    |
| 4  | Bosnia and Herzegovina | Physical violence by firearm                    | 0 (0 to 0)    | 0 (0 to 1)    | 127.3% (104% to 155%)     |
| 5  | Bosnia and Herzegovina | Physical violence by other means                | 37 (26 to 52) | 30 (22 to 43) | -17.5% (-23.1% to -11.6%) |
| 6  | Bosnia and Herzegovina | Physical violence by sharp object               | 2 (1 to 3)    | 2 (1 to 3)    | 3.8% (-5.8% to 14.8%)     |
| 7  | Bosnia and Herzegovina | Poisoning by carbon monoxide                    | 0 (0 to 0)    | 0 (0 to 0)    | -10% (-26.7% to 10.4%)    |
| 8  | Bosnia and Herzegovina | Poisoning by other means                        | 1 (1 to 1)    | 0 (0 to 1)    | -47% (-57.1% to -35.3%)   |
| 9  | Bosnia and Herzegovina | Pulmonary aspiration and foreign body in airway | 1 (1 to 2)    | 1 (1 to 2)    | -15.2% (-22.8% to -6.7%)  |
| 10 | Bosnia and Herzegovina | Self-harm by firearm                            | 0 (0 to 1)    | 0 (0 to 1)    | 32.3% (16% to 49.3%)      |
| 11 | Bosnia and Herzegovina | Self-harm by other specified means              | 2 (1 to 3)    | 2 (1 to 3)    | -1.6% (-7.2% to 3.8%)     |
| 12 | Bosnia and Herzegovina | Unintentional firearm injuries                  | 1 (1 to 2)    | 1 (1 to 2)    | -19.8% (-28% to -11.4%)   |
| 13 | Bosnia and Herzegovina | Venomous animal contact                         | 7 (3 to 13)   | 5 (2 to 9)    | -31.3% (-35.5% to -26.5%) |
| 14 | Botswana               | Adverse effects of medical treatment            | 0 (0 to 0)    | 0 (0 to 0)    | 0% (0% to 0%)             |
| 15 | Botswana               | Conflict and terrorism                          | 2 (1 to 6)    | 0 (0 to 0)    | NA                        |
| 16 | Botswana               | Cyclist road injuries                           | 12 (7 to 19)  | 16 (10 to 24) | 26.7% (18% to 36.8%)      |
| 17 | Botswana               | Drowning                                        | 0 (0 to 0)    | 0 (0 to 0)    | -0.1% (-9.4% to 11%)      |
| 18 | Botswana               | Environmental heat and cold exposure            | 0 (0 to 1)    | 0 (0 to 1)    | -10% (-16.5% to -3.7%)    |
| 19 | Botswana               | Executions and police conflict                  | 0 (0 to 0)    | 0 (0 to 0)    | NA                        |
| 20 | Botswana               | Exposure to forces of nature                    | 0 (0 to 0)    | 0 (0 to 0)    | NA                        |
| 21 | Botswana               | Falls                                           | 23 (15 to 36) | 26 (16 to 40) | 11.9% (7.5% to 16.6%)     |
| 22 | Botswana               | Fire, heat, and hot substances                  | 0 (0 to 0)    | 0 (0 to 0)    | -7.8% (-13.2% to -1.1%)   |
| 23 | Botswana               | Foreign body in eyes                            | 0 (0 to 0)    | 0 (0 to 0)    | 0.4% (-0.1% to 1.3%)      |
| 24 | Botswana               | Foreign body in other body part                 | 4 (2 to 9)    | 4 (2 to 9)    | -3.9% (-9.8% to 2.4%)     |
| 25 | Botswana               | Motor vehicle road injuries                     | 31 (21 to 43) | 41 (28 to 56) | 32.8% (22.6% to 42.9%)    |
| 26 | Botswana               | Motorcyclist road injuries                      | 8 (6 to 11)   | 8 (6 to 12)   | 4.2% (-6.1% to 14.2%)     |
| 27 | Botswana               | Non-venomous animal contact                     | 4 (2 to 8)    | 3 (1 to 6)    | -23.5% (-27.5% to -19.6%) |
| 28 | Botswana               | Other exposure to mechanical forces             | 32 (16 to 59) | 28 (14 to 51) | -13.1% (-18.8% to -7.9%)  |
| 29 | Botswana               | Other road injuries                             | 1 (1 to 3)    | 2 (1 to 4)    | 29.8% (18.2% to 42.9%)    |
| 30 | Botswana               | Other transport injuries                        | 3 (2 to 5)    | 3 (2 to 5)    | -7.9% (-13.1% to -1.5%)   |
| 31 | Botswana               | Other unintentional injuries                    | 3 (2 to 5)    | 2 (1 to 4)    | -17.6% (-22.2% to -12.3%) |
| 32 | Botswana               | Pedestrian road injuries                        | 38 (28 to 50) | 43 (31 to 56) | 12.2% (4.4% to 19.6%)     |
| 33 | Botswana               | Physical violence by firearm                    | 0 (0 to 0)    | 1 (0 to 1)    | 266.9% (208.3% to 348.8%) |
| 34 | Botswana               | Physical violence by other means                | 6 (4 to 10)   | 17 (11 to 26) | 157.5% (125.5% to 198.5%) |
| 35 | Botswana               | Physical violence by sharp object               | 2 (1 to 4)    | 5 (3 to 10)   | 153.7% (116.2% to 205.7%) |
| 36 | Botswana               | Poisoning by carbon monoxide                    | 0 (0 to 0)    | 0 (0 to 0)    | 14.2% (2.5% to 26.5%)     |
| 37 | Botswana               | Poisoning by other means                        | 0 (0 to 0)    | 0 (0 to 0)    | -21.2% (-28.9% to -13.5%) |
| 38 | Botswana               | Pulmonary aspiration and foreign body in airway | 0 (0 to 0)    | 0 (0 to 0)    | -15.3% (-22.5% to -8.3%)  |
| 39 | Botswana               | Self-harm by firearm                            | 0 (0 to 0)    | 0 (0 to 0)    | 25.3% (15.9% to 35.8%)    |
| 40 | Botswana               | Self-harm by other specified means              | 0 (0 to 0)    | 0 (0 to 0)    | 17.9% (10.7% to 25.1%)    |
| 41 | Botswana               | Unintentional firearm injuries                  | 1 (0 to 1)    | 0 (0 to 1)    | -15.7% (-24.4% to -6.3%)  |
| 42 | Botswana               | Venomous animal contact                         | 0 (0 to 1)    | 0 (0 to 1)    | -24.6% (-31.4% to -17.7%) |
| 43 | Brazil                 | Adverse effects of medical treatment            | 0 (0 to 0)    | 0 (0 to 0)    | 0% (0% to 0%)             |
| 44 | Brazil                 | Conflict and terrorism                          | 0 (0 to 0)    | 0 (0 to 0)    | NA                        |
| 45 |                        |                                                 |               |               |                           |
| 46 |                        |                                                 |               |               |                           |

|    |                   |                                                 |                  |                  |                           |
|----|-------------------|-------------------------------------------------|------------------|------------------|---------------------------|
| 1  |                   |                                                 |                  |                  |                           |
| 2  | Brazil            | Cyclist road injuries                           | 9 (5 to 15)      | 6 (4 to 11)      | -33.1% (-42% to -22.6%)   |
| 3  | Brazil            | Drowning                                        | 0 (0 to 0)       | 0 (0 to 0)       | -41% (-44.7% to -37.2%)   |
| 4  | Brazil            | Environmental heat and cold exposure            | 2 (1 to 4)       | 2 (1 to 4)       | -0.6% (-7.4% to 7.2%)     |
| 5  | Brazil            | Executions and police conflict                  | 0 (0 to 0)       | 0 (0 to 0)       | NA                        |
| 6  | Brazil            | Exposure to forces of nature                    | 0 (0 to 0)       | 0 (0 to 0)       | NA                        |
| 7  | Brazil            | Falls                                           | 83 (52 to 128)   | 78 (49 to 119)   | -5.9% (-7.9% to -3.9%)    |
| 8  | Brazil            | Fire, heat, and hot substances                  | 1 (0 to 1)       | 0 (0 to 1)       | -53.1% (-55.5% to -50.5%) |
| 9  | Brazil            | Foreign body in eyes                            | 0 (0 to 0)       | 0 (0 to 0)       | -0.2% (-0.5% to 0%)       |
| 10 | Brazil            | Foreign body in other body part                 | 1 (0 to 2)       | 0 (0 to 1)       | -60.8% (-65.2% to -51.6%) |
| 11 | Brazil            | Motor vehicle road injuries                     | 16 (10 to 24)    | 8 (5 to 13)      | -49% (-57% to -40.8%)     |
| 12 | Brazil            | Motorcyclist road injuries                      | 17 (12 to 25)    | 41 (30 to 55)    | 136.3% (106% to 172.3%)   |
| 13 | Brazil            | Non-venomous animal contact                     | 2 (1 to 5)       | 1 (0 to 2)       | -53.9% (-57.1% to -49.5%) |
| 14 | Brazil            | Other exposure to mechanical forces             | 42 (21 to 78)    | 31 (15 to 57)    | -25.4% (-28.2% to -21.9%) |
| 15 | Brazil            | Other road injuries                             | 4 (2 to 7)       | 6 (3 to 10)      | 42.4% (25.3% to 63.1%)    |
| 16 | Brazil            | Other transport injuries                        | 3 (2 to 4)       | 1 (1 to 2)       | -53% (-55.3% to -50.6%)   |
| 17 | Brazil            | Other unintentional injuries                    | 8 (5 to 15)      | 6 (4 to 11)      | -27.7% (-30.4% to -24.5%) |
| 18 | Brazil            | Pedestrian road injuries                        | 39 (29 to 52)    | 22 (15 to 31)    | -43.9% (-51.2% to -36.8%) |
| 19 | Brazil            | Physical violence by firearm                    | 3 (2 to 5)       | 5 (3 to 9)       | 92.2% (65.2% to 127.5%)   |
| 20 | Brazil            | Physical violence by other means                | 20 (13 to 31)    | 15 (9 to 24)     | -27% (-34.3% to -21.2%)   |
| 21 | Brazil            | Physical violence by sharp object               | 5 (2 to 9)       | 3 (1 to 6)       | -36.1% (-44.1% to -28.6%) |
| 22 | Brazil            | Poisoning by carbon monoxide                    | 0 (0 to 0)       | 0 (0 to 0)       | -31.3% (-42.3% to -11.6%) |
| 23 | Brazil            | Poisoning by other means                        | 0 (0 to 0)       | 0 (0 to 0)       | -46.6% (-52.3% to -39.4%) |
| 24 | Brazil            | Pulmonary aspiration and foreign body in airway | 0 (0 to 0)       | 0 (0 to 0)       | -48.5% (-54.1% to -43.8%) |
| 25 | Brazil            | Self-harm by firearm                            | 0 (0 to 0)       | 0 (0 to 0)       | 4.6% (-4.5% to 17.9%)     |
| 26 | Brazil            | Self-harm by other specified means              | 0 (0 to 0)       | 0 (0 to 0)       | -37.6% (-47.5% to -30.1%) |
| 27 | Brazil            | Unintentional firearm injuries                  | 2 (1 to 4)       | 1 (0 to 2)       | -56.6% (-60.3% to -52.2%) |
| 28 | Brazil            | Venomous animal contact                         | 3 (1 to 6)       | 1 (0 to 3)       | -53.4% (-56.6% to -48.6%) |
| 29 | Brunei Darussalam | Adverse effects of medical treatment            | 0 (0 to 0)       | 0 (0 to 0)       | 0% (0% to 0%)             |
| 30 | Brunei Darussalam | Conflict and terrorism                          | 0 (0 to 0)       | 0 (0 to 0)       | NA                        |
| 31 | Brunei Darussalam | Cyclist road injuries                           | 31 (21 to 42)    | 22 (16 to 30)    | -28.2% (-34.3% to -21.3%) |
| 32 | Brunei Darussalam | Drowning                                        | 0 (0 to 1)       | 1 (0 to 1)       | 28.3% (16.8% to 40.6%)    |
| 33 | Brunei Darussalam | Environmental heat and cold exposure            | 4 (3 to 6)       | 5 (3 to 7)       | 4.8% (0.5% to 9.4%)       |
| 34 | Brunei Darussalam | Executions and police conflict                  | 0 (0 to 0)       | 0 (0 to 0)       | NA                        |
| 35 | Brunei Darussalam | Exposure to forces of nature                    | 0 (0 to 0)       | 0 (0 to 0)       | NA                        |
| 36 | Brunei Darussalam | Falls                                           | 168 (131 to 217) | 179 (141 to 228) | 6.6% (2.9% to 10.8%)      |
| 37 | Brunei Darussalam | Fire, heat, and hot substances                  | 4 (2 to 6)       | 3 (2 to 5)       | -26% (-31.5% to -20.6%)   |
| 38 | Brunei Darussalam | Foreign body in eyes                            | 0 (0 to 0)       | 0 (0 to 0)       | -0.4% (-1% to -0.1%)      |
| 39 | Brunei Darussalam | Foreign body in other body part                 | 3 (1 to 5)       | 3 (2 to 6)       | 16.2% (8.4% to 25.9%)     |
| 40 | Brunei Darussalam | Motor vehicle road injuries                     | 67 (51 to 84)    | 34 (26 to 44)    | -48.5% (-52.6% to -44.3%) |
| 41 | Brunei Darussalam | Motorcyclist road injuries                      | 20 (15 to 26)    | 13 (10 to 17)    | -32.1% (-40% to -23.9%)   |
| 42 | Brunei Darussalam | Non-venomous animal contact                     | 5 (3 to 9)       | 4 (2 to 8)       | -9.8% (-14.3% to -5.3%)   |
| 43 | Brunei Darussalam | Other exposure to mechanical forces             | 73 (45 to 114)   | 68 (42 to 106)   | -7.1% (-11.6% to -2.4%)   |
| 44 | Brunei Darussalam | Other road injuries                             | 2 (1 to 3)       | 1 (1 to 2)       | -34.3% (-40.8% to -27.3%) |
| 45 |                   |                                                 |                  |                  |                           |
| 46 |                   |                                                 |                  |                  |                           |

|    |                   |                                                 |                  |                  |                           |
|----|-------------------|-------------------------------------------------|------------------|------------------|---------------------------|
| 1  |                   |                                                 |                  |                  |                           |
| 2  | Brunei Darussalam | Other transport injuries                        | 9 (7 to 11)      | 5 (4 to 7)       | -42.1% (-47.8% to -34.6%) |
| 3  | Brunei Darussalam | Other unintentional injuries                    | 36 (24 to 57)    | 29 (19 to 46)    | -20.5% (-26% to -15.3%)   |
| 4  | Brunei Darussalam | Pedestrian road injuries                        | 17 (13 to 22)    | 13 (9 to 16)     | -27.4% (-33.5% to -20.7%) |
| 5  | Brunei Darussalam | Physical violence by firearm                    | 0 (0 to 0)       | 0 (0 to 1)       | 75.1% (50.9% to 103.8%)   |
| 6  | Brunei Darussalam | Physical violence by other means                | 17 (12 to 24)    | 13 (9 to 19)     | -22.1% (-27.9% to -15.4%) |
| 7  | Brunei Darussalam | Physical violence by sharp object               | 1 (1 to 2)       | 1 (1 to 2)       | -19.3% (-30.7% to -8%)    |
| 8  | Brunei Darussalam | Poisoning by carbon monoxide                    | 0 (0 to 0)       | 0 (0 to 0)       | -1.7% (-11% to 9.1%)      |
| 9  | Brunei Darussalam | Poisoning by other means                        | 0 (0 to 1)       | 0 (0 to 0)       | -20% (-26.1% to -13%)     |
| 10 | Brunei Darussalam | Pulmonary aspiration and foreign body in airway | 0 (0 to 1)       | 1 (0 to 1)       | 1.5% (-5.9% to 9.2%)      |
| 11 | Brunei Darussalam | Self-harm by firearm                            | 0 (0 to 0)       | 0 (0 to 0)       | -0.1% (-15.9% to 15.3%)   |
| 12 | Brunei Darussalam | Self-harm by other specified means              | 1 (1 to 2)       | 1 (1 to 2)       | 5.7% (-1.4% to 12.9%)     |
| 13 | Brunei Darussalam | Unintentional firearm injuries                  | 1 (1 to 2)       | 1 (1 to 2)       | -5% (-13.4% to 3.2%)      |
| 14 | Brunei Darussalam | Venomous animal contact                         | 2 (1 to 4)       | 2 (1 to 4)       | -6.7% (-11.8% to -0.8%)   |
| 15 | Bulgaria          | Adverse effects of medical treatment            | 0 (0 to 0)       | 0 (0 to 0)       | 0% (0% to 0%)             |
| 16 | Bulgaria          | Conflict and terrorism                          | 0 (0 to 0)       | 0 (0 to 0)       | NA                        |
| 17 | Bulgaria          | Cyclist road injuries                           | 64 (46 to 86)    | 58 (41 to 79)    | -9.7% (-19.8% to 2%)      |
| 18 | Bulgaria          | Drowning                                        | 0 (0 to 0)       | 0 (0 to 1)       | 25% (9.5% to 39.4%)       |
| 19 | Bulgaria          | Environmental heat and cold exposure            | 3 (2 to 4)       | 2 (2 to 3)       | -11.5% (-15.7% to -6.8%)  |
| 20 | Bulgaria          | Executions and police conflict                  | 0 (0 to 0)       | 0 (0 to 0)       | NA                        |
| 21 | Bulgaria          | Exposure to forces of nature                    | 0 (0 to 0)       | 0 (0 to 0)       | NA                        |
| 22 | Bulgaria          | Falls                                           | 255 (195 to 333) | 250 (190 to 333) | -2.1% (-7.4% to 2.9%)     |
| 23 | Bulgaria          | Fire, heat, and hot substances                  | 4 (2 to 6)       | 4 (2 to 6)       | -7.1% (-13.3% to -1.2%)   |
| 24 | Bulgaria          | Foreign body in eyes                            | 0 (0 to 0)       | 0 (0 to 0)       | 0.2% (-0.1% to 0.6%)      |
| 25 | Bulgaria          | Foreign body in other body part                 | 3 (1 to 5)       | 2 (1 to 5)       | -1.6% (-7.6% to 4.4%)     |
| 26 | Bulgaria          | Motor vehicle road injuries                     | 114 (88 to 145)  | 112 (87 to 143)  | -1.7% (-14.8% to 12.2%)   |
| 27 | Bulgaria          | Motorcyclist road injuries                      | 22 (16 to 28)    | 18 (13 to 24)    | -16.1% (-29.1% to -1.5%)  |
| 28 | Bulgaria          | Non-venomous animal contact                     | 6 (3 to 11)      | 5 (3 to 10)      | -11% (-15.3% to -6.5%)    |
| 29 | Bulgaria          | Other exposure to mechanical forces             | 148 (93 to 230)  | 158 (99 to 243)  | 6.2% (0.6% to 12.1%)      |
| 30 | Bulgaria          | Other road injuries                             | 2 (1 to 3)       | 1 (1 to 2)       | -12.6% (-23.1% to -0.5%)  |
| 31 | Bulgaria          | Other transport injuries                        | 9 (7 to 12)      | 7 (5 to 9)       | -23.3% (-29.1% to -17.2%) |
| 32 | Bulgaria          | Other unintentional injuries                    | 59 (39 to 92)    | 30 (19 to 49)    | -48.9% (-55.5% to -41.6%) |
| 33 | Bulgaria          | Pedestrian road injuries                        | 53 (41 to 67)    | 26 (19 to 34)    | -51.6% (-58.3% to -44.6%) |
| 34 | Bulgaria          | Physical violence by firearm                    | 0 (0 to 1)       | 0 (0 to 1)       | -12.9% (-30.1% to 5.5%)   |
| 35 | Bulgaria          | Physical violence by other means                | 41 (30 to 56)    | 26 (18 to 36)    | -36.2% (-44.7% to -27.4%) |
| 36 | Bulgaria          | Physical violence by sharp object               | 3 (2 to 6)       | 2 (1 to 3)       | -45% (-55.7% to -34.1%)   |
| 37 | Bulgaria          | Poisoning by carbon monoxide                    | 0 (0 to 0)       | 0 (0 to 0)       | 25.6% (8.5% to 41.9%)     |
| 38 | Bulgaria          | Poisoning by other means                        | 0 (0 to 1)       | 0 (0 to 1)       | -6.8% (-17.8% to 4.2%)    |
| 39 | Bulgaria          | Pulmonary aspiration and foreign body in airway | 1 (1 to 2)       | 1 (0 to 2)       | -25.5% (-34.4% to -17.4%) |
| 40 | Bulgaria          | Self-harm by firearm                            | 1 (0 to 1)       | 1 (0 to 1)       | -11.7% (-23.4% to 2%)     |
| 41 | Bulgaria          | Self-harm by other specified means              | 4 (2 to 6)       | 2 (1 to 3)       | -37.3% (-41.5% to -33%)   |
| 42 | Bulgaria          | Unintentional firearm injuries                  | 1 (1 to 2)       | 1 (1 to 2)       | -7.8% (-16.5% to 1.1%)    |
| 43 | Bulgaria          | Venomous animal contact                         | 5 (2 to 10)      | 4 (2 to 8)       | -12.4% (-16.8% to -7.7%)  |
| 44 | Burkina Faso      | Adverse effects of medical treatment            | 0 (0 to 0)       | 0 (0 to 0)       | 0% (0% to 0%)             |
| 45 |                   |                                                 |                  |                  |                           |
| 46 |                   |                                                 |                  |                  |                           |

|    |              |                                                 |               |               |                           |
|----|--------------|-------------------------------------------------|---------------|---------------|---------------------------|
| 1  |              |                                                 |               |               |                           |
| 2  | Burkina Faso | Conflict and terrorism                          | 0 (0 to 0)    | 14 (4 to 36)  | NA                        |
| 3  | Burkina Faso | Cyclist road injuries                           | 28 (18 to 41) | 36 (24 to 54) | 31% (21.5% to 41.1%)      |
| 4  | Burkina Faso | Drowning                                        | 0 (0 to 0)    | 0 (0 to 0)    | -6.5% (-12.8% to 1%)      |
| 5  | Burkina Faso | Environmental heat and cold exposure            | 0 (0 to 1)    | 0 (0 to 1)    | 2.5% (-2.5% to 8%)        |
| 6  | Burkina Faso | Executions and police conflict                  | 0 (0 to 0)    | 5 (2 to 11)   | NA                        |
| 7  | Burkina Faso | Exposure to forces of nature                    | 0 (0 to 0)    | 0 (0 to 0)    | NA                        |
| 8  | Burkina Faso | Falls                                           | 18 (12 to 26) | 21 (14 to 31) | 17.7% (14% to 21.8%)      |
| 9  | Burkina Faso | Fire, heat, and hot substances                  | 0 (0 to 0)    | 0 (0 to 0)    | -2.2% (-8.1% to 3.3%)     |
| 10 | Burkina Faso | Foreign body in eyes                            | 0 (0 to 0)    | 0 (0 to 0)    | -0.1% (-0.6% to 0.3%)     |
| 11 | Burkina Faso | Foreign body in other body part                 | 3 (1 to 7)    | 3 (1 to 7)    | -1.9% (-6% to 2.4%)       |
| 12 | Burkina Faso | Motor vehicle road injuries                     | 41 (28 to 59) | 49 (33 to 69) | 18.3% (9.2% to 27.9%)     |
| 13 | Burkina Faso | Motorcyclist road injuries                      | 31 (22 to 43) | 43 (31 to 59) | 37.6% (28.2% to 48%)      |
| 14 | Burkina Faso | Non-venomous animal contact                     | 3 (1 to 6)    | 3 (1 to 5)    | -1.2% (-16.2% to -8%)     |
| 15 | Burkina Faso | Other exposure to mechanical forces             | 21 (10 to 38) | 21 (10 to 38) | -1% (-6.4% to 5.3%)       |
| 16 | Burkina Faso | Other road injuries                             | 2 (1 to 4)    | 2 (1 to 4)    | 8.5% (-0.3% to 18.1%)     |
| 17 | Burkina Faso | Other transport injuries                        | 3 (2 to 4)    | 3 (2 to 4)    | -6.3% (-11.6% to -0.2%)   |
| 18 | Burkina Faso | Other unintentional injuries                    | 3 (2 to 4)    | 2 (1 to 4)    | -8.9% (-13.1% to -3.8%)   |
| 19 | Burkina Faso | Pedestrian road injuries                        | 52 (38 to 69) | 56 (40 to 74) | 5.9% (-1% to 13.3%)       |
| 20 | Burkina Faso | Physical violence by firearm                    | 0 (0 to 0)    | 0 (0 to 1)    | 25.4% (11% to 42.3%)      |
| 21 | Burkina Faso | Physical violence by other means                | 9 (6 to 14)   | 10 (6 to 14)  | 5.5% (0.4% to 10.9%)      |
| 22 | Burkina Faso | Physical violence by sharp object               | 3 (1 to 5)    | 3 (1 to 5)    | 4.3% (-2.3% to 11.7%)     |
| 23 | Burkina Faso | Poisoning by carbon monoxide                    | 0 (0 to 0)    | 0 (0 to 0)    | 5.1% (-4% to 15.4%)       |
| 24 | Burkina Faso | Poisoning by other means                        | 0 (0 to 0)    | 0 (0 to 0)    | -10.4% (-16.8% to -3.4%)  |
| 25 | Burkina Faso | Pulmonary aspiration and foreign body in airway | 0 (0 to 0)    | 0 (0 to 0)    | -8.7% (-17.6% to -0.3%)   |
| 26 | Burkina Faso | Self-harm by firearm                            | 0 (0 to 0)    | 0 (0 to 0)    | 19.2% (11.7% to 28.5%)    |
| 27 | Burkina Faso | Self-harm by other specified means              | 0 (0 to 0)    | 0 (0 to 0)    | 12.2% (6.4% to 18.2%)     |
| 28 | Burkina Faso | Unintentional firearm injuries                  | 1 (0 to 2)    | 1 (0 to 2)    | -10% (-17.6% to -2.4%)    |
| 29 | Burkina Faso | Venomous animal contact                         | 0 (0 to 1)    | 0 (0 to 1)    | -11.7% (-17.5% to -5.1%)  |
| 30 | Burundi      | Adverse effects of medical treatment            | 0 (0 to 0)    | 0 (0 to 0)    | 0% (0% to 0%)             |
| 31 | Burundi      | Conflict and terrorism                          | 1 (0 to 2)    | 4 (2 to 9)    | NA                        |
| 32 | Burundi      | Cyclist road injuries                           | 67 (50 to 87) | 54 (40 to 70) | -19.5% (-25.5% to -13.7%) |
| 33 | Burundi      | Drowning                                        | 0 (0 to 0)    | 0 (0 to 0)    | -24% (-29.6% to -17.8%)   |
| 34 | Burundi      | Environmental heat and cold exposure            | 2 (2 to 3)    | 2 (1 to 3)    | -11.2% (-16.8% to -5.6%)  |
| 35 | Burundi      | Executions and police conflict                  | 0 (0 to 0)    | 1 (0 to 2)    | NA                        |
| 36 | Burundi      | Exposure to forces of nature                    | 0 (0 to 0)    | 0 (0 to 0)    | NA                        |
| 37 | Burundi      | Falls                                           | 50 (39 to 64) | 53 (41 to 69) | 6.4% (1.3% to 11.6%)      |
| 38 | Burundi      | Fire, heat, and hot substances                  | 2 (1 to 4)    | 2 (1 to 3)    | -18.1% (-23.9% to -12.9%) |
| 39 | Burundi      | Foreign body in eyes                            | 0 (0 to 0)    | 0 (0 to 0)    | 2.3% (1.1% to 4.2%)       |
| 40 | Burundi      | Foreign body in other body part                 | 3 (1 to 5)    | 3 (1 to 5)    | 3.3% (-2.8% to 9.1%)      |
| 41 | Burundi      | Motor vehicle road injuries                     | 42 (32 to 55) | 40 (29 to 52) | -5.1% (-12.5% to 2.9%)    |
| 42 | Burundi      | Motorcyclist road injuries                      | 15 (12 to 20) | 14 (11 to 19) | -6.2% (-13.1% to 1.7%)    |
| 43 | Burundi      | Non-venomous animal contact                     | 11 (6 to 18)  | 10 (6 to 17)  | -7.3% (-12.5% to -2%)     |
| 44 | Burundi      | Other exposure to mechanical forces             | 17 (10 to 29) | 16 (10 to 27) | -6.1% (-12.4% to -0.4%)   |
| 45 |              |                                                 |               |               |                           |
| 46 |              |                                                 |               |               |                           |

|    |            |                                                 |               |               |                           |
|----|------------|-------------------------------------------------|---------------|---------------|---------------------------|
| 1  |            |                                                 |               |               |                           |
| 2  | Burundi    | Other road injuries                             | 1 (1 to 2)    | 1 (1 to 2)    | 16.8% (6.9% to 27.8%)     |
| 3  | Burundi    | Other transport injuries                        | 6 (5 to 8)    | 6 (4 to 7)    | -8.6% (-14.4% to -1.8%)   |
| 4  | Burundi    | Other unintentional injuries                    | 9 (6 to 14)   | 7 (5 to 11)   | -22% (-26.8% to -17%)     |
| 5  | Burundi    | Pedestrian road injuries                        | 63 (49 to 79) | 55 (42 to 68) | -13.4% (-19% to -7.2%)    |
| 6  | Burundi    | Physical violence by firearm                    | 0 (0 to 0)    | 0 (0 to 0)    | 22.1% (10.2% to 36.8%)    |
| 7  | Burundi    | Physical violence by other means                | 4 (2 to 5)    | 4 (2 to 5)    | 1.6% (-3.6% to 8%)        |
| 8  | Burundi    | Physical violence by sharp object               | 1 (1 to 2)    | 1 (1 to 2)    | 0.9% (-5.4% to 8.3%)      |
| 9  | Burundi    | Poisoning by carbon monoxide                    | 0 (0 to 0)    | 0 (0 to 0)    | 7.2% (-2.9% to 19.3%)     |
| 10 | Burundi    | Poisoning by other means                        | 0 (0 to 0)    | 0 (0 to 0)    | -23% (-29.3% to -16.2%)   |
| 11 | Burundi    | Pulmonary aspiration and foreign body in airway | 0 (0 to 1)    | 0 (0 to 1)    | -5.4% (-15.6% to 8.2%)    |
| 12 | Burundi    | Self-harm by firearm                            | 0 (0 to 0)    | 0 (0 to 0)    | -0.9% (-13.1% to 15.3%)   |
| 13 | Burundi    | Self-harm by other specified means              | 1 (1 to 2)    | 1 (1 to 2)    | -26.1% (-29.8% to -22.4%) |
| 14 | Burundi    | Unintentional firearm injuries                  | 2 (1 to 3)    | 2 (1 to 3)    | -13.4% (-21.1% to -5.9%)  |
| 15 | Burundi    | Venomous animal contact                         | 4 (2 to 9)    | 4 (1 to 8)    | -15.3% (-22.5% to -8.3%)  |
| 16 | Cabo Verde | Adverse effects of medical treatment            | 0 (0 to 0)    | 0 (0 to 0)    | 0% (0% to 0%)             |
| 17 | Cabo Verde | Conflict and terrorism                          | 0 (0 to 0)    | 0 (0 to 0)    | NA                        |
| 18 | Cabo Verde | Cyclist road injuries                           | 24 (15 to 36) | 27 (17 to 40) | 11.4% (3.3% to 20%)       |
| 19 | Cabo Verde | Drowning                                        | 0 (0 to 0)    | 0 (0 to 0)    | 55.3% (41.9% to 67.8%)    |
| 20 | Cabo Verde | Environmental heat and cold exposure            | 0 (0 to 1)    | 0 (0 to 1)    | 7.2% (1.2% to 14.1%)      |
| 21 | Cabo Verde | Executions and police conflict                  | 0 (0 to 0)    | 0 (0 to 0)    | NA                        |
| 22 | Cabo Verde | Exposure to forces of nature                    | 0 (0 to 0)    | 0 (0 to 0)    | NA                        |
| 23 | Cabo Verde | Falls                                           | 18 (12 to 28) | 26 (17 to 38) | 42% (36.7% to 47.9%)      |
| 24 | Cabo Verde | Fire, heat, and hot substances                  | 0 (0 to 0)    | 0 (0 to 0)    | 9.2% (2.9% to 15.5%)      |
| 25 | Cabo Verde | Foreign body in eyes                            | 0 (0 to 0)    | 0 (0 to 0)    | 2.1% (0.1% to 5.5%)       |
| 26 | Cabo Verde | Foreign body in other body part                 | 4 (2 to 8)    | 4 (2 to 8)    | -1.7% (-6.7% to 3.3%)     |
| 27 | Cabo Verde | Motor vehicle road injuries                     | 25 (17 to 36) | 35 (24 to 50) | 39.9% (28.7% to 52.7%)    |
| 28 | Cabo Verde | Motorcyclist road injuries                      | 16 (11 to 23) | 20 (14 to 29) | 24.2% (15.2% to 34.2%)    |
| 29 | Cabo Verde | Non-venomous animal contact                     | 3 (1 to 6)    | 2 (1 to 5)    | -13.7% (-20.1% to -6.5%)  |
| 30 | Cabo Verde | Other exposure to mechanical forces             | 27 (13 to 50) | 26 (13 to 47) | -4.6% (-9.7% to 0.6%)     |
| 31 | Cabo Verde | Other road injuries                             | 2 (1 to 5)    | 2 (1 to 5)    | 1.6% (-7.3% to 10.9%)     |
| 32 | Cabo Verde | Other transport injuries                        | 3 (2 to 4)    | 3 (2 to 4)    | 5% (-0.8% to 11.7%)       |
| 33 | Cabo Verde | Other unintentional injuries                    | 4 (2 to 6)    | 3 (2 to 6)    | -11.1% (-16.5% to -6.1%)  |
| 34 | Cabo Verde | Pedestrian road injuries                        | 37 (27 to 49) | 47 (34 to 62) | 28.1% (19.2% to 37.2%)    |
| 35 | Cabo Verde | Physical violence by firearm                    | 0 (0 to 1)    | 1 (0 to 1)    | 110.8% (89.6% to 138.5%)  |
| 36 | Cabo Verde | Physical violence by other means                | 14 (9 to 22)  | 16 (11 to 24) | 12.1% (4.8% to 20.5%)     |
| 37 | Cabo Verde | Physical violence by sharp object               | 3 (2 to 6)    | 4 (2 to 7)    | 16.1% (7.6% to 27%)       |
| 38 | Cabo Verde | Poisoning by carbon monoxide                    | 0 (0 to 0)    | 0 (0 to 0)    | 20.4% (10.2% to 32.6%)    |
| 39 | Cabo Verde | Poisoning by other means                        | 0 (0 to 0)    | 0 (0 to 0)    | -6% (-11.5% to -0.3%)     |
| 40 | Cabo Verde | Pulmonary aspiration and foreign body in airway | 0 (0 to 0)    | 0 (0 to 0)    | -21.1% (-29.1% to -13.4%) |
| 41 | Cabo Verde | Self-harm by firearm                            | 0 (0 to 0)    | 0 (0 to 0)    | 48.3% (35.1% to 61.8%)    |
| 42 | Cabo Verde | Self-harm by other specified means              | 0 (0 to 0)    | 0 (0 to 0)    | 37.9% (27.2% to 50.4%)    |
| 43 | Cabo Verde | Unintentional firearm injuries                  | 1 (0 to 2)    | 1 (0 to 2)    | -11.4% (-19.2% to -2.7%)  |
| 44 | Cabo Verde | Venomous animal contact                         | 1 (0 to 1)    | 0 (0 to 1)    | -21.6% (-28.4% to -13.2%) |
| 45 |            |                                                 |               |               |                           |
| 46 |            |                                                 |               |               |                           |

|    |          |                                                 |               |                 |                           |
|----|----------|-------------------------------------------------|---------------|-----------------|---------------------------|
| 1  |          |                                                 |               |                 |                           |
| 2  | Cambodia | Adverse effects of medical treatment            | 0 (0 to 0)    | 0 (0 to 0)      | 0% (0% to 0%)             |
| 3  | Cambodia | Conflict and terrorism                          | 22 (9 to 51)  | 0 (0 to 0)      | NA                        |
| 4  | Cambodia | Cyclist road injuries                           | 16 (11 to 23) | 17 (12 to 24)   | 5.8% (-3.6% to 16.1%)     |
| 5  | Cambodia | Drowning                                        | 1 (0 to 1)    | 0 (0 to 1)      | -31.2% (-36.2% to -24.5%) |
| 6  | Cambodia | Environmental heat and cold exposure            | 2 (1 to 2)    | 2 (1 to 3)      | 5.1% (0.7% to 9.9%)       |
| 7  | Cambodia | Executions and police conflict                  | 0 (0 to 0)    | 0 (0 to 0)      | NA                        |
| 8  | Cambodia | Exposure to forces of nature                    | 0 (0 to 0)    | 0 (0 to 0)      | NA                        |
| 9  | Cambodia | Falls                                           | 71 (57 to 90) | 123 (99 to 155) | 73.5% (67.6% to 79.9%)    |
| 10 | Cambodia | Fire, heat, and hot substances                  | 1 (1 to 2)    | 1 (1 to 2)      | -25.5% (-32% to -18.6%)   |
| 11 | Cambodia | Foreign body in eyes                            | 0 (0 to 0)    | 0 (0 to 0)      | 2.8% (1.6% to 4.3%)       |
| 12 | Cambodia | Foreign body in other body part                 | 1 (0 to 2)    | 1 (0 to 2)      | -0.5% (-5.7% to 5.3%)     |
| 13 | Cambodia | Motor vehicle road injuries                     | 22 (16 to 30) | 21 (15 to 28)   | -5.9% (-13.7% to 3.1%)    |
| 14 | Cambodia | Motorcyclist road injuries                      | 39 (31 to 49) | 39 (31 to 50)   | 1.9% (-7.1% to 11.5%)     |
| 15 | Cambodia | Non-venomous animal contact                     | 6 (4 to 11)   | 5 (3 to 8)      | -26.2% (-31% to -21.2%)   |
| 16 | Cambodia | Other exposure to mechanical forces             | 17 (10 to 28) | 15 (9 to 25)    | -11.4% (-16.6% to -6.1%)  |
| 17 | Cambodia | Other road injuries                             | 1 (1 to 2)    | 1 (1 to 2)      | 6.3% (-5.2% to 18.2%)     |
| 18 | Cambodia | Other transport injuries                        | 5 (4 to 7)    | 5 (4 to 7)      | -11.5% (-18.9% to -2.8%)  |
| 19 | Cambodia | Other unintentional injuries                    | 8 (5 to 13)   | 9 (5 to 14)     | 7.7% (-0.3% to 15.7%)     |
| 20 | Cambodia | Pedestrian road injuries                        | 15 (11 to 19) | 13 (10 to 17)   | -9.8% (-17.3% to -2.3%)   |
| 21 | Cambodia | Physical violence by firearm                    | 0 (0 to 0)    | 0 (0 to 0)      | 22.4% (5.6% to 40.5%)     |
| 22 | Cambodia | Physical violence by other means                | 16 (11 to 22) | 15 (10 to 22)   | -3.3% (-10.4% to 4.2%)    |
| 23 | Cambodia | Physical violence by sharp object               | 3 (2 to 5)    | 3 (2 to 5)      | -5.5% (-16.2% to 5.6%)    |
| 24 | Cambodia | Poisoning by carbon monoxide                    | 0 (0 to 0)    | 0 (0 to 0)      | 44.6% (29% to 62.1%)      |
| 25 | Cambodia | Poisoning by other means                        | 0 (0 to 0)    | 0 (0 to 0)      | -8.1% (-16.3% to -0.6%)   |
| 26 | Cambodia | Pulmonary aspiration and foreign body in airway | 0 (0 to 0)    | 0 (0 to 0)      | -26.1% (-33.3% to -17.3%) |
| 27 | Cambodia | Self-harm by firearm                            | 0 (0 to 0)    | 0 (0 to 0)      | 60.9% (35.4% to 95.3%)    |
| 28 | Cambodia | Self-harm by other specified means              | 1 (1 to 2)    | 1 (1 to 2)      | -9.8% (-15% to -4.2%)     |
| 29 | Cambodia | Unintentional firearm injuries                  | 2 (1 to 3)    | 2 (1 to 3)      | -11.4% (-20% to -2.6%)    |
| 30 | Cambodia | Venomous animal contact                         | 1 (0 to 3)    | 1 (0 to 3)      | -17.1% (-23.3% to -10.2%) |
| 31 | Cameroon | Adverse effects of medical treatment            | 0 (0 to 0)    | 0 (0 to 0)      | 0% (0% to 0%)             |
| 32 | Cameroon | Conflict and terrorism                          | 0 (0 to 1)    | 10 (3 to 24)    | NA                        |
| 33 | Cameroon | Cyclist road injuries                           | 29 (19 to 45) | 36 (23 to 54)   | 23.5% (14.9% to 33.3%)    |
| 34 | Cameroon | Drowning                                        | 0 (0 to 0)    | 0 (0 to 0)      | -6.4% (-13.1% to 0.4%)    |
| 35 | Cameroon | Environmental heat and cold exposure            | 0 (0 to 1)    | 0 (0 to 1)      | -0.5% (-5.6% to 6%)       |
| 36 | Cameroon | Executions and police conflict                  | 0 (0 to 0)    | 1 (0 to 3)      | NA                        |
| 37 | Cameroon | Exposure to forces of nature                    | 0 (0 to 0)    | 0 (0 to 0)      | NA                        |
| 38 | Cameroon | Falls                                           | 19 (12 to 29) | 22 (15 to 33)   | 15.7% (11.6% to 19.7%)    |
| 39 | Cameroon | Fire, heat, and hot substances                  | 0 (0 to 0)    | 0 (0 to 0)      | -6.8% (-11.9% to -0.9%)   |
| 40 | Cameroon | Foreign body in eyes                            | 0 (0 to 0)    | 0 (0 to 0)      | 0.1% (-0.1% to 0.5%)      |
| 41 | Cameroon | Foreign body in other body part                 | 3 (1 to 7)    | 3 (1 to 8)      | 2.2% (-3.3% to 7.8%)      |
| 42 | Cameroon | Motor vehicle road injuries                     | 67 (47 to 93) | 75 (52 to 103)  | 11.7% (3.3% to 20.6%)     |
| 43 | Cameroon | Motorcyclist road injuries                      | 60 (44 to 79) | 61 (45 to 81)   | 2.3% (-4.2% to 9.6%)      |
| 44 | Cameroon | Non-venomous animal contact                     | 2 (1 to 5)    | 3 (1 to 5)      | 0.2% (-4.8% to 5.6%)      |
| 45 |          |                                                 |               |                 |                           |
| 46 |          |                                                 |               |                 |                           |



|    |          |                                                 |                  |                  |                           |
|----|----------|-------------------------------------------------|------------------|------------------|---------------------------|
| 1  |          |                                                 |                  |                  |                           |
| 2  | Cameroon | Other exposure to mechanical forces             | 25 (13 to 45)    | 23 (11 to 43)    | -8.7% (-14.9% to -2.8%)   |
| 3  | Cameroon | Other road injuries                             | 2 (1 to 4)       | 2 (1 to 5)       | 24.3% (13.1% to 36.2%)    |
| 4  | Cameroon | Other transport injuries                        | 3 (2 to 4)       | 3 (2 to 4)       | -3% (-9.2% to 4.2%)       |
| 5  | Cameroon | Other unintentional injuries                    | 3 (2 to 5)       | 2 (1 to 4)       | -10.2% (-15.6% to -4.1%)  |
| 6  | Cameroon | Pedestrian road injuries                        | 38 (27 to 52)    | 40 (28 to 54)    | 5.3% (-2.4% to 13.3%)     |
| 7  | Cameroon | Physical violence by firearm                    | 0 (0 to 0)       | 0 (0 to 0)       | 32.5% (15.4% to 52.1%)    |
| 8  | Cameroon | Physical violence by other means                | 5 (3 to 8)       | 5 (3 to 8)       | -2.9% (-8.2% to 2%)       |
| 9  | Cameroon | Physical violence by sharp object               | 1 (1 to 2)       | 1 (1 to 2)       | 1.3% (-6.2% to 8.8%)      |
| 10 | Cameroon | Poisoning by carbon monoxide                    | 0 (0 to 0)       | 0 (0 to 0)       | 10.9% (-0.5% to 25.2%)    |
| 11 | Cameroon | Poisoning by other means                        | 0 (0 to 0)       | 0 (0 to 0)       | -15.1% (-22.4% to -7.1%)  |
| 12 | Cameroon | Pulmonary aspiration and foreign body in airway | 0 (0 to 0)       | 0 (0 to 0)       | 1.8% (-8.2% to 11.7%)     |
| 13 | Cameroon | Self-harm by firearm                            | 0 (0 to 0)       | 0 (0 to 0)       | 37.9% (28.6% to 49.6%)    |
| 14 | Cameroon | Self-harm by other specified means              | 0 (0 to 0)       | 0 (0 to 0)       | 25.6% (17.9% to 33.5%)    |
| 15 | Cameroon | Unintentional firearm injuries                  | 1 (0 to 2)       | 1 (0 to 2)       | -11.1% (-19.8% to -1.1%)  |
| 16 | Cameroon | Venomous animal contact                         | 0 (0 to 1)       | 0 (0 to 1)       | -0.1% (-7.7% to 7.2%)     |
| 17 | Canada   | Adverse effects of medical treatment            | 0 (0 to 0)       | 0 (0 to 0)       | 0% (0% to 0%)             |
| 18 | Canada   | Conflict and terrorism                          | 0 (0 to 0)       | 0 (0 to 0)       | NA                        |
| 19 | Canada   | Cyclist road injuries                           | 15 (10 to 21)    | 13 (9 to 17)     | -14.1% (-27.4% to 0.9%)   |
| 20 | Canada   | Drowning                                        | 0 (0 to 0)       | 0 (0 to 1)       | 38.6% (22.8% to 56.2%)    |
| 21 | Canada   | Environmental heat and cold exposure            | 4 (3 to 5)       | 3 (2 to 5)       | -8.3% (-13.9% to -3.8%)   |
| 22 | Canada   | Executions and police conflict                  | 0 (0 to 0)       | 0 (0 to 0)       | NA                        |
| 23 | Canada   | Exposure to forces of nature                    | 0 (0 to 0)       | 0 (0 to 0)       | NA                        |
| 24 | Canada   | Falls                                           | 182 (147 to 228) | 224 (181 to 279) | 23.5% (18.4% to 28.9%)    |
| 25 | Canada   | Fire, heat, and hot substances                  | 3 (2 to 5)       | 2 (1 to 4)       | -18.8% (-25.5% to -13.4%) |
| 26 | Canada   | Foreign body in eyes                            | 0 (0 to 0)       | 0 (0 to 0)       | 0.3% (0% to 0.9%)         |
| 27 | Canada   | Foreign body in other body part                 | 1 (1 to 3)       | 1 (1 to 3)       | 0.3% (-3.8% to 4.2%)      |
| 28 | Canada   | Motor vehicle road injuries                     | 75 (59 to 92)    | 44 (34 to 55)    | -40.8% (-48.4% to -31%)   |
| 29 | Canada   | Motorcyclist road injuries                      | 10 (7 to 13)     | 8 (6 to 11)      | -18.6% (-34.1% to 0.8%)   |
| 30 | Canada   | Non-venomous animal contact                     | 6 (3 to 10)      | 6 (3 to 10)      | -4.6% (-8.7% to -0.5%)    |
| 31 | Canada   | Other exposure to mechanical forces             | 51 (31 to 81)    | 44 (26 to 70)    | -14.7% (-21.7% to -8.2%)  |
| 32 | Canada   | Other road injuries                             | 1 (1 to 2)       | 1 (1 to 2)       | 21.3% (2.9% to 44.4%)     |
| 33 | Canada   | Other transport injuries                        | 19 (14 to 24)    | 18 (14 to 23)    | -1.9% (-5.1% to 1.6%)     |
| 34 | Canada   | Other unintentional injuries                    | 32 (21 to 50)    | 27 (18 to 43)    | -14.9% (-19.6% to -10.2%) |
| 35 | Canada   | Pedestrian road injuries                        | 9 (7 to 11)      | 7 (5 to 9)       | -18.7% (-29.6% to -5.6%)  |
| 36 | Canada   | Physical violence by firearm                    | 1 (1 to 1)       | 1 (1 to 2)       | 43.4% (29.8% to 56.4%)    |
| 37 | Canada   | Physical violence by other means                | 17 (12 to 25)    | 18 (13 to 26)    | 4.6% (-3.7% to 11.7%)     |
| 38 | Canada   | Physical violence by sharp object               | 3 (2 to 4)       | 3 (2 to 4)       | -0.1% (-10% to 10.4%)     |
| 39 | Canada   | Poisoning by carbon monoxide                    | 0 (0 to 0)       | 0 (0 to 0)       | 7.9% (-0.7% to 16.9%)     |
| 40 | Canada   | Poisoning by other means                        | 0 (0 to 1)       | 0 (0 to 1)       | -8.9% (-13.9% to -4.2%)   |
| 41 | Canada   | Pulmonary aspiration and foreign body in airway | 1 (1 to 1)       | 1 (0 to 1)       | -12.8% (-18.8% to -7.5%)  |
| 42 | Canada   | Self-harm by firearm                            | 0 (0 to 1)       | 0 (0 to 0)       | -47.1% (-58.4% to -34.2%) |
| 43 | Canada   | Self-harm by other specified means              | 6 (4 to 9)       | 6 (4 to 10)      | 1.4% (-5.1% to 7.9%)      |
| 44 | Canada   | Unintentional firearm injuries                  | 2 (1 to 3)       | 2 (1 to 3)       | -0.8% (-12.7% to 11.6%)   |
| 45 |          |                                                 |                  |                  |                           |
| 46 |          |                                                 |                  |                  |                           |

|    |                          |                                                 |                |               |                           |
|----|--------------------------|-------------------------------------------------|----------------|---------------|---------------------------|
| 1  | Canada                   | Venomous animal contact                         | 3 (1 to 6)     | 3 (1 to 5)    | -4.6% (-9.6% to 0.4%)     |
| 2  | Central African Republic | Adverse effects of medical treatment            | 0 (0 to 0)     | 0 (0 to 0)    | 0% (0% to 0%)             |
| 3  | Central African Republic | Conflict and terrorism                          | 0 (0 to 0)     | 39 (16 to 89) | NA                        |
| 4  | Central African Republic | Cyclist road injuries                           | 18 (12 to 25)  | 20 (13 to 27) | 11% (3.7% to 19.2%)       |
| 5  | Central African Republic | Drowning                                        | 0 (0 to 0)     | 0 (0 to 0)    | -17.5% (-23.5% to -10.9%) |
| 6  | Central African Republic | Environmental heat and cold exposure            | 2 (2 to 3)     | 2 (1 to 3)    | -3.3% (-7.7% to 1.4%)     |
| 7  | Central African Republic | Executions and police conflict                  | 0 (0 to 0)     | 0 (0 to 1)    | NA                        |
| 8  | Central African Republic | Exposure to forces of nature                    | 0 (0 to 0)     | 0 (0 to 0)    | NA                        |
| 9  | Central African Republic | Falls                                           | 35 (28 to 44)  | 34 (27 to 44) | -2.2% (-5.7% to 1.2%)     |
| 10 | Central African Republic | Fire, heat, and hot substances                  | 1 (1 to 2)     | 1 (1 to 1)    | -8.5% (-13.1% to -3.4%)   |
| 11 | Central African Republic | Foreign body in eyes                            | 0 (0 to 0)     | 0 (0 to 0)    | -0.2% (-0.8% to 0.3%)     |
| 12 | Central African Republic | Foreign body in other body part                 | 3 (2 to 7)     | 3 (2 to 7)    | -1.9% (-6.7% to 3.3%)     |
| 13 | Central African Republic | Motor vehicle road injuries                     | 30 (22 to 39)  | 30 (22 to 40) | 2% (-5.2% to 10.1%)       |
| 14 | Central African Republic | Motorcyclist road injuries                      | 15 (11 to 19)  | 18 (14 to 23) | 21.3% (10.5% to 33.4%)    |
| 15 | Central African Republic | Non-venomous animal contact                     | 8 (5 to 14)    | 8 (5 to 14)   | 1.5% (-2.9% to 6.5%)      |
| 16 | Central African Republic | Other exposure to mechanical forces             | 14 (8 to 23)   | 13 (7 to 21)  | -9.5% (-15% to -3%)       |
| 17 | Central African Republic | Other road injuries                             | 1 (1 to 2)     | 1 (1 to 2)    | 8.4% (0.2% to 17.9%)      |
| 18 | Central African Republic | Other transport injuries                        | 6 (5 to 8)     | 6 (5 to 8)    | 1.3% (-3.2% to 6.2%)      |
| 19 | Central African Republic | Other unintentional injuries                    | 7 (5 to 12)    | 7 (4 to 10)   | -12.8% (-17.2% to -8.1%)  |
| 20 | Central African Republic | Pedestrian road injuries                        | 38 (29 to 47)  | 35 (27 to 44) | -7.1% (-12.3% to -1.2%)   |
| 21 | Central African Republic | Physical violence by firearm                    | 0 (0 to 0)     | 0 (0 to 0)    | 121.2% (94.6% to 155.1%)  |
| 22 | Central African Republic | Physical violence by other means                | 6 (4 to 8)     | 14 (10 to 19) | 142.7% (112.9% to 173.9%) |
| 23 | Central African Republic | Physical violence by sharp object               | 2 (2 to 4)     | 6 (4 to 9)    | 157.8% (124.6% to 200%)   |
| 24 | Central African Republic | Poisoning by carbon monoxide                    | 0 (0 to 0)     | 0 (0 to 0)    | -0.3% (-9.7% to 10.4%)    |
| 25 | Central African Republic | Poisoning by other means                        | 0 (0 to 0)     | 0 (0 to 0)    | -13.6% (-19.4% to -7.6%)  |
| 26 | Central African Republic | Pulmonary aspiration and foreign body in airway | 0 (0 to 1)     | 0 (0 to 1)    | -3.8% (-13.6% to 6.9%)    |
| 27 | Central African Republic | Self-harm by firearm                            | 0 (0 to 1)     | 0 (0 to 1)    | -3.6% (-13.9% to 8.8%)    |
| 28 | Central African Republic | Self-harm by other specified means              | 1 (1 to 2)     | 1 (1 to 2)    | -13.1% (-17.9% to -8.1%)  |
| 29 | Central African Republic | Unintentional firearm injuries                  | 1 (1 to 2)     | 1 (1 to 2)    | -3.6% (-10.5% to 3.9%)    |
| 30 | Chad                     | Venomous animal contact                         | 1 (0 to 4)     | 2 (1 to 4)    | 9.7% (3.3% to 18.3%)      |
| 31 | Chad                     | Adverse effects of medical treatment            | 0 (0 to 0)     | 0 (0 to 0)    | 0% (0% to 0%)             |
| 32 | Chad                     | Conflict and terrorism                          | 53 (16 to 133) | 8 (2 to 20)   | NA                        |
| 33 | Chad                     | Cyclist road injuries                           | 24 (15 to 35)  | 28 (18 to 42) | 19.6% (11.2% to 27.8%)    |
| 34 | Chad                     | Drowning                                        | 0 (0 to 0)     | 0 (0 to 0)    | -6.9% (-12.2% to -1%)     |
| 35 | Chad                     | Environmental heat and cold exposure            | 0 (0 to 1)     | 0 (0 to 1)    | 3.9% (-1.4% to 9.8%)      |
| 36 | Chad                     | Executions and police conflict                  | 0 (0 to 0)     | 0 (0 to 0)    | NA                        |
| 37 | Chad                     | Exposure to forces of nature                    | 0 (0 to 0)     | 0 (0 to 0)    | NA                        |
| 38 | Chad                     | Falls                                           | 15 (10 to 23)  | 18 (11 to 27) | 14.1% (10.3% to 17.8%)    |
| 39 | Chad                     | Fire, heat, and hot substances                  | 0 (0 to 0)     | 0 (0 to 0)    | 5.2% (-0.1% to 11.1%)     |
| 40 | Chad                     | Foreign body in eyes                            | 0 (0 to 0)     | 0 (0 to 0)    | 1.6% (0.2% to 3.5%)       |
| 41 | Chad                     | Foreign body in other body part                 | 4 (1 to 8)     | 4 (2 to 8)    | 0.4% (-4.8% to 6.3%)      |
| 42 | Chad                     | Motor vehicle road injuries                     | 42 (29 to 58)  | 54 (37 to 74) | 28.2% (19.6% to 37.5%)    |
| 43 | Chad                     | Motorcyclist road injuries                      | 15 (10 to 21)  | 22 (16 to 31) | 49.1% (37.8% to 60.8%)    |

|    |       |                                                 |                  |                  |                           |
|----|-------|-------------------------------------------------|------------------|------------------|---------------------------|
| 1  |       |                                                 |                  |                  |                           |
| 2  | Chad  | Non-venomous animal contact                     | 3 (1 to 6)       | 3 (2 to 6)       | 2.5% (-2% to 7.7%)        |
| 3  | Chad  | Other exposure to mechanical forces             | 26 (13 to 47)    | 25 (12 to 45)    | -4% (-9% to 1.3%)         |
| 4  | Chad  | Other road injuries                             | 2 (1 to 4)       | 2 (1 to 4)       | 12% (4% to 20.7%)         |
| 5  | Chad  | Other transport injuries                        | 3 (2 to 4)       | 3 (2 to 4)       | 1.3% (-4.1% to 7.4%)      |
| 6  | Chad  | Other unintentional injuries                    | 3 (2 to 5)       | 3 (2 to 5)       | -6.5% (-10.6% to -1.7%)   |
| 7  | Chad  | Pedestrian road injuries                        | 51 (38 to 66)    | 59 (43 to 77)    | 16.1% (9.4% to 22.6%)     |
| 8  | Chad  | Physical violence by firearm                    | 0 (0 to 0)       | 0 (0 to 0)       | 29.1% (18.5% to 40.4%)    |
| 9  | Chad  | Physical violence by other means                | 7 (5 to 10)      | 9 (6 to 13)      | 26.5% (19.8% to 34.2%)    |
| 10 | Chad  | Physical violence by sharp object               | 2 (1 to 3)       | 2 (1 to 4)       | 22.7% (13.7% to 33.4%)    |
| 11 | Chad  | Poisoning by carbon monoxide                    | 0 (0 to 0)       | 0 (0 to 0)       | 9.2% (-1% to 21.3%)       |
| 12 | Chad  | Poisoning by other means                        | 0 (0 to 0)       | 0 (0 to 0)       | -4.9% (-11.1% to 2.3%)    |
| 13 | Chad  | Pulmonary aspiration and foreign body in airway | 0 (0 to 0)       | 0 (0 to 0)       | -6.4% (-16.2% to 3.5%)    |
| 14 | Chad  | Self-harm by firearm                            | 0 (0 to 0)       | 0 (0 to 0)       | 31.3% (22.3% to 42.9%)    |
| 15 | Chad  | Self-harm by other specified means              | 0 (0 to 0)       | 0 (0 to 0)       | 20.7% (14.6% to 27%)      |
| 16 | Chad  | Unintentional firearm injuries                  | 1 (0 to 2)       | 1 (0 to 2)       | -12.3% (-18.8% to -5.5%)  |
| 17 | Chile | Venomous animal contact                         | 0 (0 to 1)       | 1 (0 to 1)       | 3.9% (-2.9% to 11.9%)     |
| 18 | Chile | Adverse effects of medical treatment            | 0 (0 to 0)       | 0 (0 to 0)       | 0% (0% to 0%)             |
| 19 | Chile | Conflict and terrorism                          | 0 (0 to 1)       | 0 (0 to 0)       | NA                        |
| 20 | Chile | Cyclist road injuries                           | 21 (15 to 28)    | 24 (17 to 32)    | 16.2% (4.5% to 31.6%)     |
| 21 | Chile | Drowning                                        | 0 (0 to 0)       | 0 (0 to 1)       | 68.2% (46.5% to 91.7%)    |
| 22 | Chile | Environmental heat and cold exposure            | 2 (1 to 3)       | 2 (1 to 2)       | -14.8% (-21.1% to -9.7%)  |
| 23 | Chile | Executions and police conflict                  | 0 (0 to 0)       | 0 (0 to 0)       | NA                        |
| 24 | Chile | Exposure to forces of nature                    | 0 (0 to 0)       | 0 (0 to 0)       | NA                        |
| 25 | Chile | Falls                                           | 138 (107 to 178) | 177 (137 to 228) | 28.6% (23.8% to 33.4%)    |
| 26 | Chile | Fire, heat, and hot substances                  | 6 (3 to 9)       | 4 (2 to 7)       | -27% (-35% to -20.7%)     |
| 27 | Chile | Foreign body in eyes                            | 0 (0 to 0)       | 0 (0 to 0)       | 0.2% (0% to 0.6%)         |
| 28 | Chile | Foreign body in other body part                 | 2 (1 to 5)       | 2 (1 to 5)       | 3.9% (-0.9% to 9.5%)      |
| 29 | Chile | Motor vehicle road injuries                     | 32 (25 to 42)    | 33 (25 to 42)    | 1.6% (-8.6% to 13.2%)     |
| 30 | Chile | Motorcyclist road injuries                      | 4 (3 to 5)       | 6 (5 to 8)       | 68.1% (45.7% to 96%)      |
| 31 | Chile | Non-venomous animal contact                     | 5 (3 to 9)       | 4 (2 to 8)       | -18.9% (-22.7% to -14.8%) |
| 32 | Chile | Other exposure to mechanical forces             | 82 (51 to 128)   | 85 (52 to 133)   | 3.4% (-2.8% to 10.3%)     |
| 33 | Chile | Other road injuries                             | 1 (1 to 2)       | 1 (1 to 2)       | 6.9% (-4.3% to 19.7%)     |
| 34 | Chile | Other transport injuries                        | 4 (3 to 5)       | 4 (3 to 5)       | -5.8% (-12.1% to 0.1%)    |
| 35 | Chile | Other unintentional injuries                    | 31 (20 to 50)    | 28 (18 to 45)    | -10.8% (-17.9% to -4.3%)  |
| 36 | Chile | Pedestrian road injuries                        | 20 (16 to 25)    | 15 (12 to 20)    | -23.2% (-31.2% to -14.6%) |
| 37 | Chile | Physical violence by firearm                    | 0 (0 to 1)       | 1 (1 to 2)       | 260.4% (182.6% to 366.9%) |
| 38 | Chile | Physical violence by other means                | 37 (27 to 52)    | 30 (21 to 43)    | -20.1% (-31.8% to -7.3%)  |
| 39 | Chile | Physical violence by sharp object               | 4 (2 to 6)       | 7 (5 to 12)      | 94.4% (53.2% to 145.1%)   |
| 40 | Chile | Poisoning by carbon monoxide                    | 0 (0 to 0)       | 0 (0 to 0)       | 33.2% (21.1% to 45.6%)    |
| 41 | Chile | Poisoning by other means                        | 0 (0 to 1)       | 0 (0 to 1)       | 6.1% (-1.9% to 13.1%)     |
| 42 | Chile | Pulmonary aspiration and foreign body in airway | 1 (1 to 2)       | 0 (0 to 1)       | -55.8% (-63.3% to -46.6%) |
| 43 | Chile | Self-harm by firearm                            | 1 (0 to 1)       | 0 (0 to 1)       | -40.8% (-50.6% to -30.6%) |
| 44 | Chile | Self-harm by other specified means              | 3 (2 to 5)       | 3 (2 to 4)       | -14.9% (-20.3% to -9%)    |
| 45 |       |                                                 |                  |                  |                           |
| 46 |       |                                                 |                  |                  |                           |

|    |          |                                                 |                 |                |                           |
|----|----------|-------------------------------------------------|-----------------|----------------|---------------------------|
| 1  |          |                                                 |                 |                |                           |
| 2  | Chile    | Unintentional firearm injuries                  | 4 (2 to 6)      | 3 (2 to 6)     | -16.7% (-28.1% to -5.1%)  |
| 3  | Chile    | Venomous animal contact                         | 4 (1 to 7)      | 3 (1 to 6)     | -21.1% (-25.4% to -16.9%) |
| 4  | China    | Adverse effects of medical treatment            | 0 (0 to 0)      | 0 (0 to 0)     | 0% (0% to 0%)             |
| 5  | China    | Conflict and terrorism                          | 0 (0 to 0)      | 0 (0 to 0)     | NA                        |
| 6  | China    | Cyclist road injuries                           | 11 (7 to 17)    | 21 (13 to 32)  | 92.2% (82.2% to 102.4%)   |
| 7  | China    | Drowning                                        | 0 (0 to 0)      | 0 (0 to 0)     | -10.2% (-21.4% to 1.5%)   |
| 8  | China    | Environmental heat and cold exposure            | 0 (0 to 1)      | 0 (0 to 1)     | -10.7% (-16.6% to -5.4%)  |
| 9  | China    | Executions and police conflict                  | 0 (0 to 0)      | 0 (0 to 0)     | NA                        |
| 10 | China    | Exposure to forces of nature                    | 1 (0 to 1)      | 0 (0 to 0)     | NA                        |
| 11 | China    | Falls                                           | 45 (29 to 69)   | 56 (37 to 82)  | 23% (17.2% to 30.1%)      |
| 12 | China    | Fire, heat, and hot substances                  | 0 (0 to 0)      | 0 (0 to 0)     | 10.7% (4.5% to 16.2%)     |
| 13 | China    | Foreign body in eyes                            | 0 (0 to 0)      | 0 (0 to 0)     | -29.2% (-32.6% to -25.7%) |
| 14 | China    | Foreign body in other body part                 | 1 (1 to 3)      | 1 (0 to 1)     | -49.7% (-54.9% to -42.8%) |
| 15 | China    | Motor vehicle road injuries                     | 9 (5 to 13)     | 19 (12 to 29)  | 118.8% (107.1% to 131.6%) |
| 16 | China    | Motorcyclist road injuries                      | 17 (12 to 23)   | 36 (26 to 49)  | 114.5% (103.8% to 127.7%) |
| 17 | China    | Non-venomous animal contact                     | 2 (1 to 4)      | 1 (1 to 3)     | -40.2% (-43% to -37.2%)   |
| 18 | China    | Other exposure to mechanical forces             | 12 (6 to 22)    | 17 (9 to 33)   | 50.1% (38.6% to 63.5%)    |
| 19 | China    | Other road injuries                             | 2 (1 to 3)      | 3 (1 to 6)     | 91.1% (80.6% to 102.2%)   |
| 20 | China    | Other transport injuries                        | 3 (2 to 4)      | 2 (2 to 4)     | -18.1% (-25.2% to -11.4%) |
| 21 | China    | Other unintentional injuries                    | 1 (1 to 2)      | 1 (1 to 2)     | -20.9% (-25.3% to -15.2%) |
| 22 | China    | Pedestrian road injuries                        | 20 (14 to 27)   | 32 (22 to 43)  | 58.8% (51.3% to 66.3%)    |
| 23 | China    | Physical violence by firearm                    | 0 (0 to 1)      | 1 (0 to 1)     | 18.6% (-3.7% to 40.6%)    |
| 24 | China    | Physical violence by other means                | 15 (10 to 22)   | 14 (9 to 21)   | -7.4% (-12.3% to -2.7%)   |
| 25 | China    | Physical violence by sharp object               | 2 (1 to 5)      | 2 (1 to 3)     | -30.6% (-37.3% to -24.1%) |
| 26 | China    | Poisoning by carbon monoxide                    | 0 (0 to 0)      | 0 (0 to 0)     | 38.1% (30.4% to 47.3%)    |
| 27 | China    | Poisoning by other means                        | 0 (0 to 0)      | 0 (0 to 0)     | -1% (-6.5% to 4.7%)       |
| 28 | China    | Pulmonary aspiration and foreign body in airway | 0 (0 to 0)      | 0 (0 to 0)     | -30.7% (-37.4% to -22%)   |
| 29 | China    | Self-harm by firearm                            | 0 (0 to 0)      | 0 (0 to 0)     | -25.7% (-36.3% to -9.8%)  |
| 30 | China    | Self-harm by other specified means              | 0 (0 to 1)      | 0 (0 to 0)     | -64.4% (-70.5% to -57.7%) |
| 31 | China    | Unintentional firearm injuries                  | 1 (0 to 2)      | 1 (0 to 2)     | -20.3% (-28% to -10.5%)   |
| 32 | China    | Venomous animal contact                         | 0 (0 to 1)      | 0 (0 to 0)     | -49.1% (-53.7% to -42.9%) |
| 33 | Colombia | Adverse effects of medical treatment            | 0 (0 to 0)      | 0 (0 to 0)     | 0% (0% to 0%)             |
| 34 | Colombia | Conflict and terrorism                          | 25 (10 to 56)   | 0 (0 to 0)     | NA                        |
| 35 | Colombia | Cyclist road injuries                           | 33 (23 to 45)   | 28 (19 to 38)  | -14.2% (-24.5% to -2.4%)  |
| 36 | Colombia | Drowning                                        | 0 (0 to 0)      | 0 (0 to 1)     | 51.8% (33.6% to 71.2%)    |
| 37 | Colombia | Environmental heat and cold exposure            | 3 (2 to 4)      | 3 (2 to 4)     | -5.7% (-10.7% to -0.3%)   |
| 38 | Colombia | Executions and police conflict                  | 0 (0 to 0)      | 0 (0 to 0)     | NA                        |
| 39 | Colombia | Exposure to forces of nature                    | 0 (0 to 0)      | 0 (0 to 0)     | NA                        |
| 40 | Colombia | Falls                                           | 106 (82 to 137) | 89 (67 to 119) | -15.9% (-21.6% to -9.8%)  |
| 41 | Colombia | Fire, heat, and hot substances                  | 4 (3 to 7)      | 3 (2 to 5)     | -25.9% (-33.9% to -17.7%) |
| 42 | Colombia | Foreign body in eyes                            | 0 (0 to 0)      | 0 (0 to 0)     | -0.5% (-1.1% to 0%)       |
| 43 | Colombia | Foreign body in other body part                 | 1 (1 to 2)      | 1 (0 to 2)     | -3.5% (-8.6% to 2.5%)     |
| 44 | Colombia | Motor vehicle road injuries                     | 52 (39 to 66)   | 37 (27 to 47)  | -29.5% (-37% to -20.2%)   |
| 45 |          |                                                 |                 |                |                           |
| 46 |          |                                                 |                 |                |                           |

|    |          |                                                 |                |                |                           |
|----|----------|-------------------------------------------------|----------------|----------------|---------------------------|
| 1  |          |                                                 |                |                |                           |
| 2  | Colombia | Motorecyclist road injuries                     | 17 (13 to 22)  | 34 (27 to 43)  | 104% (79.2% to 133.1%)    |
| 3  | Colombia | Non-venomous animal contact                     | 6 (3 to 11)    | 5 (3 to 8)     | -23% (-28.9% to -16.4%)   |
| 4  | Colombia | Other exposure to mechanical forces             | 46 (27 to 74)  | 37 (21 to 60)  | -19.9% (-26.6% to -11.9%) |
| 5  | Colombia | Other road injuries                             | 9 (5 to 14)    | 7 (4 to 12)    | -13.7% (-24.7% to -0.8%)  |
| 6  | Colombia | Other transport injuries                        | 3 (2 to 5)     | 3 (2 to 4)     | -11.2% (-16.2% to -5.8%)  |
| 7  | Colombia | Other unintentional injuries                    | 15 (10 to 24)  | 10 (6 to 16)   | -36.6% (-43.7% to -28.9%) |
| 8  | Colombia | Pedestrian road injuries                        | 61 (49 to 75)  | 27 (21 to 34)  | -56.2% (-61.1% to -50.4%) |
| 9  | Colombia | Physical violence by firearm                    | 12 (8 to 24)   | 8 (6 to 11)    | -32.7% (-65.7% to -5.5%)  |
| 10 | Colombia | Physical violence by other means                | 49 (31 to 86)  | 26 (17 to 39)  | -47.2% (-69.3% to -30.8%) |
| 11 | Colombia | Physical violence by sharp object               | 25 (15 to 47)  | 13 (8 to 21)   | -47.6% (-70.6% to -27.9%) |
| 12 | Colombia | Poisoning by carbon monoxide                    | 0 (0 to 0)     | 0 (0 to 0)     | 29.1% (12.4% to 47.4%)    |
| 13 | Colombia | Poisoning by other means                        | 0 (0 to 0)     | 0 (0 to 0)     | -15.8% (-24.8% to -7.3%)  |
| 14 | Colombia | Pulmonary aspiration and foreign body in airway | 1 (0 to 1)     | 0 (0 to 1)     | -21.9% (-30.3% to -13.9%) |
| 15 | Colombia | Self-harm by firearm                            | 0 (0 to 0)     | 0 (0 to 0)     | 5.7% (-10.2% to 21.3%)    |
| 16 | Colombia | Self-harm by other specified means              | 0 (0 to 1)     | 1 (0 to 1)     | 59.9% (45.9% to 77.8%)    |
| 17 | Colombia | Unintentional firearm injuries                  | 4 (2 to 6)     | 2 (1 to 4)     | -32.9% (-42.2% to -23.2%) |
| 18 | Colombia | Venomous animal contact                         | 9 (4 to 16)    | 6 (3 to 11)    | -30.9% (-36.9% to -25.2%) |
| 19 | Comoros  | Adverse effects of medical treatment            | 0 (0 to 0)     | 0 (0 to 0)     | 0% (0% to 0%)             |
| 20 | Comoros  | Conflict and terrorism                          | 0 (0 to 0)     | 0 (0 to 0)     | NA                        |
| 21 | Comoros  | Cyclist road injuries                           | 39 (25 to 58)  | 45 (29 to 67)  | 17.2% (7.2% to 27.9%)     |
| 22 | Comoros  | Drowning                                        | 0 (0 to 0)     | 0 (0 to 0)     | -18.5% (-25.1% to -11.3%) |
| 23 | Comoros  | Environmental heat and cold exposure            | 0 (0 to 1)     | 0 (0 to 1)     | -9.8% (-16.5% to -3.2%)   |
| 24 | Comoros  | Executions and police conflict                  | 0 (0 to 0)     | 0 (0 to 0)     | NA                        |
| 25 | Comoros  | Exposure to forces of nature                    | 0 (0 to 0)     | 0 (0 to 0)     | NA                        |
| 26 | Comoros  | Falls                                           | 22 (14 to 34)  | 26 (16 to 41)  | 20.3% (15.3% to 25.1%)    |
| 27 | Comoros  | Fire, heat, and hot substances                  | 1 (0 to 1)     | 0 (0 to 1)     | -19.3% (-24.5% to -14.3%) |
| 28 | Comoros  | Foreign body in eyes                            | 0 (0 to 0)     | 0 (0 to 0)     | -0.1% (-0.5% to 0.5%)     |
| 29 | Comoros  | Foreign body in other body part                 | 3 (1 to 7)     | 3 (1 to 8)     | 6.5% (1% to 13.3%)        |
| 30 | Comoros  | Motor vehicle road injuries                     | 85 (59 to 117) | 86 (61 to 117) | 0.6% (-6.8% to 9.5%)      |
| 31 | Comoros  | Motorecyclist road injuries                     | 32 (22 to 45)  | 30 (21 to 42)  | -7.4% (-14.5% to 0.1%)    |
| 32 | Comoros  | Non-venomous animal contact                     | 7 (3 to 13)    | 6 (3 to 11)    | -16.1% (-21.8% to -10.2%) |
| 33 | Comoros  | Other exposure to mechanical forces             | 34 (17 to 63)  | 30 (15 to 54)  | -13.3% (-19.3% to -6.7%)  |
| 34 | Comoros  | Other road injuries                             | 2 (1 to 4)     | 2 (1 to 5)     | 23.5% (12.4% to 36.5%)    |
| 35 | Comoros  | Other transport injuries                        | 3 (2 to 4)     | 3 (2 to 4)     | -4.5% (-10.7% to 1.7%)    |
| 36 | Comoros  | Other unintentional injuries                    | 3 (2 to 5)     | 3 (2 to 5)     | -15.4% (-21.8% to -9.1%)  |
| 37 | Comoros  | Pedestrian road injuries                        | 59 (42 to 81)  | 52 (37 to 71)  | -12.7% (-19.2% to -5.1%)  |
| 38 | Comoros  | Physical violence by firearm                    | 0 (0 to 0)     | 0 (0 to 0)     | 52.8% (37.2% to 70.6%)    |
| 39 | Comoros  | Physical violence by other means                | 9 (6 to 13)    | 11 (7 to 16)   | 23.9% (15.9% to 32.1%)    |
| 40 | Comoros  | Physical violence by sharp object               | 2 (1 to 4)     | 3 (1 to 5)     | 24.1% (15.2% to 34.2%)    |
| 41 | Comoros  | Poisoning by carbon monoxide                    | 0 (0 to 0)     | 0 (0 to 0)     | 16% (3.5% to 31.4%)       |
| 42 | Comoros  | Poisoning by other means                        | 0 (0 to 0)     | 0 (0 to 0)     | -27.1% (-33.8% to -19.3%) |
| 43 | Comoros  | Pulmonary aspiration and foreign body in airway | 0 (0 to 0)     | 0 (0 to 0)     | -7.5% (-16.7% to 3.1%)    |
| 44 | Comoros  | Self-harm by firearm                            | 0 (0 to 0)     | 0 (0 to 0)     | 19.6% (11.2% to 30.4%)    |
| 45 |          |                                                 |                |                |                           |
| 46 |          |                                                 |                |                |                           |

|    |              |                                                 |               |               |                           |
|----|--------------|-------------------------------------------------|---------------|---------------|---------------------------|
| 1  |              |                                                 |               |               |                           |
| 2  | Comoros      | Self-harm by other specified means              | 0 (0 to 0)    | 0 (0 to 0)    | 5.9% (0.2% to 11.8%)      |
| 3  | Comoros      | Unintentional firearm injuries                  | 1 (0 to 2)    | 1 (0 to 2)    | -17.9% (-25.6% to -8.8%)  |
| 4  | Comoros      | Venomous animal contact                         | 1 (0 to 4)    | 1 (0 to 3)    | -31% (-40.1% to -24.2%)   |
| 5  | Congo        | Adverse effects of medical treatment            | 0 (0 to 0)    | 0 (0 to 0)    | 0% (0% to 0%)             |
| 6  | Congo        | Conflict and terrorism                          | 0 (0 to 0)    | 0 (0 to 0)    | NA                        |
| 7  | Congo        | Cyclist road injuries                           | 18 (12 to 25) | 19 (12 to 26) | 3.6% (-4% to 12.6%)       |
| 8  | Congo        | Drowning                                        | 0 (0 to 0)    | 0 (0 to 0)    | -28.4% (-35.3% to -21.2%) |
| 9  | Congo        | Environmental heat and cold exposure            | 2 (2 to 3)    | 2 (1 to 3)    | -7.3% (-12.6% to -1.5%)   |
| 10 | Congo        | Executions and police conflict                  | 0 (0 to 0)    | 0 (0 to 0)    | NA                        |
| 11 | Congo        | Exposure to forces of nature                    | 0 (0 to 0)    | 0 (0 to 0)    | NA                        |
| 12 | Congo        | Falls                                           | 39 (30 to 49) | 43 (34 to 54) | 11.9% (8.2% to 15.9%)     |
| 13 | Congo        | Fire, heat, and hot substances                  | 1 (1 to 2)    | 1 (0 to 1)    | -19.9% (-26.6% to -14.3%) |
| 14 | Congo        | Foreign body in eyes                            | 0 (0 to 0)    | 0 (0 to 0)    | 1.4% (0.6% to 2.7%)       |
| 15 | Congo        | Foreign body in other body part                 | 3 (2 to 6)    | 3 (2 to 6)    | -2.8% (-8.5% to 3.3%)     |
| 16 | Congo        | Motor vehicle road injuries                     | 44 (33 to 57) | 42 (32 to 53) | -5.7% (-12.1% to 1.7%)    |
| 17 | Congo        | Motorcyclist road injuries                      | 11 (8 to 15)  | 9 (6 to 11)   | -24.5% (-32% to -17%)     |
| 18 | Congo        | Non-venomous animal contact                     | 6 (4 to 10)   | 6 (3 to 9)    | -7.4% (-12.2% to -2.2%)   |
| 19 | Congo        | Other exposure to mechanical forces             | 16 (9 to 25)  | 14 (8 to 23)  | -12% (-18% to -6.2%)      |
| 20 | Congo        | Other road injuries                             | 1 (1 to 2)    | 1 (1 to 2)    | 6% (-3.9% to 16.8%)       |
| 21 | Congo        | Other transport injuries                        | 5 (4 to 7)    | 5 (3 to 6)    | -15.8% (-22.2% to -9.3%)  |
| 22 | Congo        | Other unintentional injuries                    | 7 (5 to 11)   | 6 (4 to 10)   | -10.1% (-17.8% to -2.8%)  |
| 23 | Congo        | Pedestrian road injuries                        | 47 (36 to 59) | 38 (29 to 47) | -19.2% (-24.4% to -13.7%) |
| 24 | Congo        | Physical violence by firearm                    | 0 (0 to 0)    | 0 (0 to 0)    | 2.9% (-7.4% to 14.7%)     |
| 25 | Congo        | Physical violence by other means                | 7 (5 to 10)   | 5 (4 to 8)    | -16.7% (-22.3% to -11.3%) |
| 26 | Congo        | Physical violence by sharp object               | 3 (2 to 4)    | 2 (1 to 3)    | -16.9% (-23.5% to -9.7%)  |
| 27 | Congo        | Poisoning by carbon monoxide                    | 0 (0 to 0)    | 0 (0 to 0)    | 10.9% (-2.1% to 23.5%)    |
| 28 | Congo        | Poisoning by other means                        | 0 (0 to 0)    | 0 (0 to 0)    | -21.2% (-28.5% to -13.5%) |
| 29 | Congo        | Pulmonary aspiration and foreign body in airway | 0 (0 to 1)    | 0 (0 to 1)    | -24% (-31.4% to -15.4%)   |
| 30 | Congo        | Self-harm by firearm                            | 0 (0 to 1)    | 0 (0 to 0)    | -11.9% (-22.3% to 0.1%)   |
| 31 | Congo        | Self-harm by other specified means              | 2 (1 to 2)    | 1 (1 to 2)    | -26.6% (-30.6% to -23%)   |
| 32 | Congo        | Unintentional firearm injuries                  | 1 (1 to 2)    | 1 (1 to 2)    | -12.4% (-20.1% to -4.4%)  |
| 33 | Congo        | Venomous animal contact                         | 1 (0 to 3)    | 1 (0 to 3)    | -3.3% (-10.4% to 4.6%)    |
| 34 | Cook Islands | Adverse effects of medical treatment            | 0 (0 to 0)    | 0 (0 to 0)    | 0% (0% to 0%)             |
| 35 | Cook Islands | Conflict and terrorism                          | 0 (0 to 0)    | 0 (0 to 0)    | NA                        |
| 36 | Cook Islands | Cyclist road injuries                           | 13 (8 to 20)  | 11 (7 to 17)  | -16.6% (-23.6% to -8%)    |
| 37 | Cook Islands | Drowning                                        | 0 (0 to 0)    | 0 (0 to 0)    | 19.2% (8% to 30.9%)       |
| 38 | Cook Islands | Environmental heat and cold exposure            | 0 (0 to 1)    | 0 (0 to 1)    | 1% (-4.7% to 6.8%)        |
| 39 | Cook Islands | Executions and police conflict                  | 0 (0 to 0)    | 0 (0 to 0)    | NA                        |
| 40 | Cook Islands | Exposure to forces of nature                    | 18 (10 to 29) | 0 (0 to 0)    | NA                        |
| 41 | Cook Islands | Falls                                           | 31 (19 to 48) | 45 (28 to 71) | 47.4% (42% to 52.6%)      |
| 42 | Cook Islands | Fire, heat, and hot substances                  | 0 (0 to 1)    | 0 (0 to 1)    | 9.8% (4.4% to 16.5%)      |
| 43 | Cook Islands | Foreign body in eyes                            | 0 (0 to 0)    | 0 (0 to 0)    | -2.6% (-4.4% to -1.1%)    |
| 44 | Cook Islands | Foreign body in other body part                 | 1 (0 to 2)    | 1 (0 to 2)    | -2.7% (-8.2% to 3.3%)     |
| 45 |              |                                                 |               |               |                           |
| 46 |              |                                                 |               |               |                           |

|    |              |                                                 |                 |                 |                           |
|----|--------------|-------------------------------------------------|-----------------|-----------------|---------------------------|
| 1  |              |                                                 |                 |                 |                           |
| 2  | Cook Islands | Motor vehicle road injuries                     | 50 (34 to 69)   | 36 (25 to 51)   | -26.8% (-32.2% to -21%)   |
| 3  | Cook Islands | Motorcyclist road injuries                      | 38 (27 to 52)   | 31 (23 to 41)   | -18.5% (-24.5% to -11.3%) |
| 4  | Cook Islands | Non-venomous animal contact                     | 2 (1 to 5)      | 2 (1 to 4)      | -16.1% (-20.2% to -11.9%) |
| 5  | Cook Islands | Other exposure to mechanical forces             | 18 (8 to 34)    | 18 (8 to 33)    | -0.9% (-5.8% to 3.4%)     |
| 6  | Cook Islands | Other road injuries                             | 3 (2 to 6)      | 3 (1 to 5)      | -21.3% (-28.8% to -12.3%) |
| 7  | Cook Islands | Other transport injuries                        | 3 (2 to 5)      | 3 (2 to 5)      | -3.3% (-8.5% to 1.9%)     |
| 8  | Cook Islands | Other unintentional injuries                    | 2 (1 to 4)      | 2 (1 to 4)      | 4.9% (-1% to 9.6%)        |
| 9  | Cook Islands | Pedestrian road injuries                        | 24 (17 to 34)   | 18 (12 to 25)   | -24.9% (-30.8% to -18.4%) |
| 10 | Cook Islands | Physical violence by firearm                    | 0 (0 to 0)      | 0 (0 to 0)      | 29.7% (14.4% to 47.3%)    |
| 11 | Cook Islands | Physical violence by other means                | 21 (14 to 32)   | 17 (11 to 26)   | -17.5% (-22.8% to -12.4%) |
| 12 | Cook Islands | Physical violence by sharp object               | 2 (1 to 4)      | 1 (1 to 3)      | -21.5% (-32.7% to -10.6%) |
| 13 | Cook Islands | Poisoning by carbon monoxide                    | 0 (0 to 0)      | 0 (0 to 0)      | 15.7% (5.9% to 27.1%)     |
| 14 | Cook Islands | Poisoning by other means                        | 0 (0 to 0)      | 0 (0 to 0)      | -8.3% (-15% to -1.2%)     |
| 15 | Cook Islands | Pulmonary aspiration and foreign body in airway | 0 (0 to 0)      | 0 (0 to 0)      | -5.8% (-16.4% to 6.9%)    |
| 16 | Cook Islands | Self-harm by firearm                            | 0 (0 to 0)      | 0 (0 to 0)      | -3.7% (-11.1% to 4.7%)    |
| 17 | Cook Islands | Self-harm by other specified means              | 0 (0 to 1)      | 0 (0 to 0)      | -23.3% (-29.6% to -16.7%) |
| 18 | Cook Islands | Unintentional firearm injuries                  | 1 (0 to 2)      | 1 (0 to 2)      | 3.5% (-6% to 13.6%)       |
| 19 | Costa Rica   | Venomous animal contact                         | 1 (0 to 2)      | 1 (0 to 2)      | -11.6% (-17.5% to -6.1%)  |
| 20 | Costa Rica   | Adverse effects of medical treatment            | 0 (0 to 0)      | 0 (0 to 0)      | 0% (0% to 0%)             |
| 21 | Costa Rica   | Conflict and terrorism                          | 0 (0 to 0)      | 0 (0 to 0)      | NA                        |
| 22 | Costa Rica   | Cyclist road injuries                           | 29 (21 to 39)   | 20 (14 to 29)   | -29.1% (-39% to -20.3%)   |
| 23 | Costa Rica   | Drowning                                        | 0 (0 to 1)      | 0 (0 to 1)      | -6.5% (-15.5% to 3.2%)    |
| 24 | Costa Rica   | Environmental heat and cold exposure            | 3 (2 to 4)      | 3 (2 to 4)      | 4.1% (-1% to 9%)          |
| 25 | Costa Rica   | Executions and police conflict                  | 0 (0 to 0)      | 0 (0 to 0)      | NA                        |
| 26 | Costa Rica   | Exposure to forces of nature                    | 0 (0 to 0)      | 0 (0 to 0)      | NA                        |
| 27 | Costa Rica   | Falls                                           | 126 (99 to 162) | 125 (97 to 161) | -1.5% (-5.6% to 2.3%)     |
| 28 | Costa Rica   | Fire, heat, and hot substances                  | 4 (2 to 6)      | 3 (2 to 6)      | -5.9% (-13.2% to 0.5%)    |
| 29 | Costa Rica   | Foreign body in eyes                            | 0 (0 to 0)      | 0 (0 to 0)      | -1% (-1.7% to -0.4%)      |
| 30 | Costa Rica   | Foreign body in other body part                 | 1 (1 to 3)      | 1 (1 to 2)      | -6% (-11.9% to -0.4%)     |
| 31 | Costa Rica   | Motor vehicle road injuries                     | 42 (32 to 53)   | 41 (31 to 52)   | -1.6% (-11.3% to 8.6%)    |
| 32 | Costa Rica   | Motorcyclist road injuries                      | 14 (11 to 18)   | 19 (15 to 25)   | 38.5% (20.8% to 57.8%)    |
| 33 | Costa Rica   | Non-venomous animal contact                     | 6 (4 to 11)     | 5 (3 to 9)      | -18.9% (-23.2% to -14.1%) |
| 34 | Costa Rica   | Other exposure to mechanical forces             | 37 (22 to 61)   | 38 (22 to 63)   | 3.3% (-2.9% to 8.9%)      |
| 35 | Costa Rica   | Other road injuries                             | 6 (3 to 9)      | 6 (3 to 9)      | 1.2% (-11.1% to 15%)      |
| 36 | Costa Rica   | Other transport injuries                        | 4 (3 to 6)      | 5 (4 to 6)      | 18.3% (9.5% to 28.1%)     |
| 37 | Costa Rica   | Other unintentional injuries                    | 12 (7 to 20)    | 11 (7 to 19)    | -6.3% (-11.6% to -0.9%)   |
| 38 | Costa Rica   | Pedestrian road injuries                        | 34 (27 to 42)   | 29 (23 to 36)   | -14.2% (-23.4% to -4.8%)  |
| 39 | Costa Rica   | Physical violence by firearm                    | 1 (1 to 1)      | 4 (3 to 6)      | 297.7% (230% to 384.1%)   |
| 40 | Costa Rica   | Physical violence by other means                | 14 (10 to 21)   | 22 (15 to 31)   | 51.3% (33.2% to 68.7%)    |
| 41 | Costa Rica   | Physical violence by sharp object               | 5 (3 to 8)      | 8 (5 to 12)     | 50.2% (28.2% to 74.5%)    |
| 42 | Costa Rica   | Poisoning by carbon monoxide                    | 0 (0 to 0)      | 0 (0 to 0)      | 13.1% (3.2% to 24.7%)     |
| 43 | Costa Rica   | Poisoning by other means                        | 0 (0 to 0)      | 0 (0 to 0)      | -4.1% (-10.6% to 2.3%)    |
| 44 | Costa Rica   | Pulmonary aspiration and foreign body in airway | 1 (0 to 1)      | 0 (0 to 1)      | -21.8% (-29.2% to -13.3%) |
| 45 |              |                                                 |                 |                 |                           |
| 46 |              |                                                 |                 |                 |                           |

|    |            |                                                 |                  |                  |                           |
|----|------------|-------------------------------------------------|------------------|------------------|---------------------------|
| 1  |            |                                                 |                  |                  |                           |
| 2  | Costa Rica | Self-harm by firearm                            | 0 (0 to 0)       | 0 (0 to 0)       | 4.2% (-8.8% to 16.7%)     |
| 3  | Costa Rica | Self-harm by other specified means              | 1 (0 to 1)       | 1 (0 to 1)       | 24.9% (15.8% to 35.8%)    |
| 4  | Costa Rica | Unintentional firearm injuries                  | 2 (1 to 4)       | 3 (2 to 4)       | 13.2% (3.6% to 23%)       |
| 5  | Costa Rica | Venomous animal contact                         | 7 (4 to 14)      | 6 (3 to 12)      | -15.8% (-20% to -11.4%)   |
| 6  | Croatia    | Adverse effects of medical treatment            | 0 (0 to 0)       | 0 (0 to 0)       | 0% (0% to 0%)             |
| 7  | Croatia    | Conflict and terrorism                          | 0 (0 to 0)       | 0 (0 to 0)       | NA                        |
| 8  | Croatia    | Cyclist road injuries                           | 71 (50 to 97)    | 67 (49 to 89)    | -5.6% (-16.3% to 8.2%)    |
| 9  | Croatia    | Drowning                                        | 0 (0 to 0)       | 1 (0 to 1)       | 91.8% (69.6% to 117%)     |
| 10 | Croatia    | Environmental heat and cold exposure            | 2 (2 to 3)       | 2 (1 to 2)       | -20.2% (-26.3% to -14.9%) |
| 11 | Croatia    | Executions and police conflict                  | 0 (0 to 0)       | 0 (0 to 0)       | NA                        |
| 12 | Croatia    | Exposure to forces of nature                    | 0 (0 to 0)       | 0 (0 to 0)       | NA                        |
| 13 | Croatia    | Falls                                           | 296 (236 to 375) | 400 (318 to 501) | 35.1% (28.7% to 42.2%)    |
| 14 | Croatia    | Fire, heat, and hot substances                  | 3 (2 to 5)       | 3 (2 to 5)       | -8.2% (-14.4% to -0.3%)   |
| 15 | Croatia    | Foreign body in eyes                            | 0 (0 to 0)       | 0 (0 to 0)       | -0.3% (-5% to 4.5%)       |
| 16 | Croatia    | Foreign body in other body part                 | 2 (1 to 4)       | 2 (1 to 4)       | -10.7% (-18.4% to -3.5%)  |
| 17 | Croatia    | Motor vehicle road injuries                     | 169 (132 to 212) | 119 (93 to 151)  | -29.9% (-37% to -21.6%)   |
| 18 | Croatia    | Motorcyclist road injuries                      | 19 (14 to 25)    | 26 (20 to 34)    | 37.5% (16.2% to 63.1%)    |
| 19 | Croatia    | Non-venomous animal contact                     | 4 (2 to 8)       | 4 (2 to 6)       | -20.2% (-28.3% to -11.6%) |
| 20 | Croatia    | Other exposure to mechanical forces             | 149 (93 to 231)  | 105 (67 to 163)  | -29.3% (-35.7% to -22.9%) |
| 21 | Croatia    | Other road injuries                             | 2 (1 to 3)       | 2 (1 to 3)       | 4.6% (-7.1% to 18.2%)     |
| 22 | Croatia    | Other transport injuries                        | 6 (5 to 8)       | 6 (4 to 7)       | -11.9% (-17.2% to -6.4%)  |
| 23 | Croatia    | Other unintentional injuries                    | 62 (41 to 97)    | 24 (14 to 39)    | -61.8% (-68.5% to -54.8%) |
| 24 | Croatia    | Pedestrian road injuries                        | 81 (63 to 102)   | 48 (36 to 62)    | -40.8% (-48.4% to -32.2%) |
| 25 | Croatia    | Physical violence by firearm                    | 1 (1 to 1)       | 1 (0 to 1)       | -38.1% (-53.6% to -21.9%) |
| 26 | Croatia    | Physical violence by other means                | 34 (24 to 48)    | 21 (14 to 29)    | -39.9% (-47.9% to -30.9%) |
| 27 | Croatia    | Physical violence by sharp object               | 3 (2 to 5)       | 2 (1 to 3)       | -42.2% (-52.1% to -32.3%) |
| 28 | Croatia    | Poisoning by carbon monoxide                    | 0 (0 to 0)       | 0 (0 to 0)       | 15% (1.9% to 29.8%)       |
| 29 | Croatia    | Poisoning by other means                        | 0 (0 to 1)       | 0 (0 to 1)       | -3.4% (-11.6% to 5.3%)    |
| 30 | Croatia    | Pulmonary aspiration and foreign body in airway | 1 (1 to 2)       | 1 (1 to 2)       | 4.6% (-3.3% to 13.2%)     |
| 31 | Croatia    | Self-harm by firearm                            | 2 (1 to 3)       | 1 (1 to 2)       | -36.8% (-44.1% to -28.7%) |
| 32 | Croatia    | Self-harm by other specified means              | 4 (2 to 6)       | 2 (2 to 4)       | -33.1% (-37.8% to -28.2%) |
| 33 | Croatia    | Unintentional firearm injuries                  | 3 (1 to 4)       | 1 (1 to 2)       | -56.1% (-64.3% to -47.6%) |
| 34 | Croatia    | Venomous animal contact                         | 4 (2 to 8)       | 3 (1 to 6)       | -24.2% (-32.6% to -15.9%) |
| 35 | Cuba       | Adverse effects of medical treatment            | 0 (0 to 0)       | 0 (0 to 0)       | 0% (0% to 0%)             |
| 36 | Cuba       | Conflict and terrorism                          | 1 (1 to 3)       | 0 (0 to 0)       | NA                        |
| 37 | Cuba       | Cyclist road injuries                           | 67 (52 to 86)    | 33 (25 to 43)    | -50.4% (-57.8% to -41.8%) |
| 38 | Cuba       | Drowning                                        | 0 (0 to 1)       | 0 (0 to 1)       | 44.7% (2.5% to 65.5%)     |
| 39 | Cuba       | Environmental heat and cold exposure            | 10 (7 to 14)     | 11 (8 to 16)     | 7.2% (1.2% to 12.7%)      |
| 40 | Cuba       | Executions and police conflict                  | 0 (0 to 0)       | 0 (0 to 0)       | NA                        |
| 41 | Cuba       | Exposure to forces of nature                    | 0 (0 to 0)       | 0 (0 to 0)       | NA                        |
| 42 | Cuba       | Falls                                           | 123 (100 to 154) | 187 (152 to 233) | 51.5% (44.6% to 58.8%)    |
| 43 | Cuba       | Fire, heat, and hot substances                  | 4 (2 to 7)       | 5 (3 to 9)       | 32% (20.5% to 44.2%)      |
| 44 | Cuba       | Foreign body in eyes                            | 0 (0 to 0)       | 0 (0 to 0)       | -0.1% (-0.5% to 0.1%)     |
| 45 |            |                                                 |                  |                  |                           |
| 46 |            |                                                 |                  |                  |                           |



|    |        |                                                 |                  |                  |                           |
|----|--------|-------------------------------------------------|------------------|------------------|---------------------------|
| 1  |        |                                                 |                  |                  |                           |
| 2  | Cuba   | Foreign body in other body part                 | 1 (1 to 3)       | 2 (1 to 3)       | 32.8% (25.4% to 40.8%)    |
| 3  | Cuba   | Motor vehicle road injuries                     | 27 (20 to 34)    | 18 (13 to 24)    | -31.5% (-41.2% to -20.6%) |
| 4  | Cuba   | Motorcyclist road injuries                      | 19 (15 to 24)    | 19 (14 to 24)    | -2.1% (-17% to 14.7%)     |
| 5  | Cuba   | Non-venomous animal contact                     | 4 (2 to 6)       | 5 (3 to 8)       | 35.3% (27.6% to 43.4%)    |
| 6  | Cuba   | Other exposure to mechanical forces             | 33 (19 to 55)    | 47 (26 to 79)    | 41.5% (30.1% to 52.1%)    |
| 7  | Cuba   | Other road injuries                             | 4 (2 to 7)       | 5 (3 to 8)       | 28.6% (10.1% to 51.2%)    |
| 8  | Cuba   | Other transport injuries                        | 5 (4 to 7)       | 8 (6 to 11)      | 58.3% (45.4% to 71.8%)    |
| 9  | Cuba   | Other unintentional injuries                    | 18 (12 to 29)    | 21 (13 to 34)    | 13.9% (4.7% to 21.5%)     |
| 10 | Cuba   | Pedestrian road injuries                        | 23 (18 to 29)    | 13 (10 to 17)    | -43.2% (-50.9% to -34.5%) |
| 11 | Cuba   | Physical violence by firearm                    | 1 (0 to 1)       | 1 (1 to 2)       | 65.5% (43.1% to 93.3%)    |
| 12 | Cuba   | Physical violence by other means                | 11 (8 to 17)     | 10 (7 to 15)     | -11.1% (-19.9% to -0.7%)  |
| 13 | Cuba   | Physical violence by sharp object               | 6 (4 to 9)       | 5 (3 to 8)       | -13.3% (-24.9% to 0.2%)   |
| 14 | Cuba   | Poisoning by carbon monoxide                    | 0 (0 to 0)       | 0 (0 to 0)       | 75.2% (59.6% to 95.5%)    |
| 15 | Cuba   | Poisoning by other means                        | 0 (0 to 0)       | 0 (0 to 0)       | 64.9% (54.4% to 76%)      |
| 16 | Cuba   | Pulmonary aspiration and foreign body in airway | 1 (0 to 1)       | 0 (0 to 1)       | -22.5% (-31% to -13.4%)   |
| 17 | Cuba   | Self-harm by firearm                            | 1 (0 to 1)       | 0 (0 to 1)       | -24.7% (-36.1% to -13.7%) |
| 18 | Cuba   | Self-harm by other specified means              | 2 (1 to 3)       | 1 (1 to 2)       | -49.8% (-54.5% to -45%)   |
| 19 | Cuba   | Unintentional firearm injuries                  | 4 (2 to 6)       | 6 (4 to 10)      | 75.8% (60.4% to 92%)      |
| 20 | Cyprus | Venomous animal contact                         | 5 (3 to 10)      | 7 (3 to 13)      | 28.3% (21.2% to 34.9%)    |
| 21 | Cyprus | Adverse effects of medical treatment            | 0 (0 to 0)       | 0 (0 to 0)       | 0% (0% to 0%)             |
| 22 | Cyprus | Conflict and terrorism                          | 0 (0 to 0)       | 0 (0 to 0)       | NA                        |
| 23 | Cyprus | Cyclist road injuries                           | 20 (14 to 27)    | 15 (11 to 20)    | -24.5% (-32.3% to -16.2%) |
| 24 | Cyprus | Drowning                                        | 0 (0 to 0)       | 0 (0 to 0)       | 80.6% (65.4% to 95.9%)    |
| 25 | Cyprus | Environmental heat and cold exposure            | 2 (2 to 3)       | 2 (2 to 3)       | -7.5% (-12.4% to -2.4%)   |
| 26 | Cyprus | Executions and police conflict                  | 0 (0 to 0)       | 0 (0 to 0)       | NA                        |
| 27 | Cyprus | Exposure to forces of nature                    | 0 (0 to 0)       | 0 (0 to 0)       | NA                        |
| 28 | Cyprus | Falls                                           | 226 (178 to 286) | 281 (220 to 362) | 24.3% (19.5% to 29%)      |
| 29 | Cyprus | Fire, heat, and hot substances                  | 2 (1 to 4)       | 2 (1 to 4)       | -9.2% (-15.7% to -3.4%)   |
| 30 | Cyprus | Foreign body in eyes                            | 0 (0 to 0)       | 0 (0 to 0)       | -0.5% (-1.2% to -0.2%)    |
| 31 | Cyprus | Foreign body in other body part                 | 2 (1 to 3)       | 2 (1 to 3)       | -0.4% (-4.8% to 4.1%)     |
| 32 | Cyprus | Motor vehicle road injuries                     | 36 (28 to 46)    | 21 (16 to 27)    | -41.2% (-46.7% to -35.3%) |
| 33 | Cyprus | Motorcyclist road injuries                      | 17 (13 to 22)    | 11 (8 to 14)     | -35.2% (-43.7% to -24.9%) |
| 34 | Cyprus | Non-venomous animal contact                     | 3 (1 to 4)       | 2 (1 to 4)       | -10.7% (-14.9% to -6.3%)  |
| 35 | Cyprus | Other exposure to mechanical forces             | 58 (36 to 91)    | 47 (28 to 74)    | -19.1% (-26.6% to -12.7%) |
| 36 | Cyprus | Other road injuries                             | 1 (1 to 2)       | 1 (0 to 1)       | -14.8% (-23.4% to -4.1%)  |
| 37 | Cyprus | Other transport injuries                        | 8 (6 to 10)      | 5 (3 to 6)       | -37.6% (-44.7% to -29.8%) |
| 38 | Cyprus | Other unintentional injuries                    | 24 (16 to 38)    | 21 (14 to 35)    | -10.8% (-15.9% to -6.1%)  |
| 39 | Cyprus | Pedestrian road injuries                        | 10 (7 to 13)     | 5 (4 to 7)       | -44.7% (-51% to -38.1%)   |
| 40 | Cyprus | Physical violence by firearm                    | 0 (0 to 1)       | 1 (0 to 1)       | 62.4% (47.2% to 80.1%)    |
| 41 | Cyprus | Physical violence by other means                | 21 (15 to 30)    | 17 (12 to 24)    | -18.8% (-24.5% to -12.5%) |
| 42 | Cyprus | Physical violence by sharp object               | 2 (1 to 3)       | 1 (1 to 2)       | -12.9% (-22.2% to -3.4%)  |
| 43 | Cyprus | Poisoning by carbon monoxide                    | 0 (0 to 0)       | 0 (0 to 0)       | 17.8% (8.3% to 27.3%)     |
| 44 | Cyprus | Poisoning by other means                        | 0 (0 to 0)       | 0 (0 to 0)       | -9.5% (-18.1% to -3.5%)   |
| 45 |        |                                                 |                  |                  |                           |
| 46 |        |                                                 |                  |                  |                           |

|    |               |                                                 |                  |                  |                           |
|----|---------------|-------------------------------------------------|------------------|------------------|---------------------------|
| 1  |               |                                                 |                  |                  |                           |
| 2  | Cyprus        | Pulmonary aspiration and foreign body in airway | 1 (1 to 2)       | 1 (0 to 1)       | -26.7% (-33.6% to -19.2%) |
| 3  | Cyprus        | Self-harm by firearm                            | 0 (0 to 0)       | 0 (0 to 0)       | 8.3% (-4.1% to 21.9%)     |
| 4  | Cyprus        | Self-harm by other specified means              | 1 (1 to 2)       | 1 (1 to 2)       | 4% (-2.1% to 10.7%)       |
| 5  | Cyprus        | Unintentional firearm injuries                  | 1 (1 to 2)       | 1 (1 to 2)       | -22.4% (-32.3% to -12.8%) |
| 6  | Cyprus        | Venomous animal contact                         | 1 (0 to 2)       | 1 (0 to 2)       | -11.5% (-17.1% to -5.8%)  |
| 7  | Czechia       | Adverse effects of medical treatment            | 0 (0 to 0)       | 0 (0 to 0)       | 0% (0% to 0%)             |
| 8  | Czechia       | Conflict and terrorism                          | 0 (0 to 0)       | 0 (0 to 0)       | NA                        |
| 9  | Czechia       | Cyclist road injuries                           | 83 (61 to 110)   | 72 (52 to 98)    | -12.9% (-23% to -0.6%)    |
| 10 | Czechia       | Drowning                                        | 0 (0 to 0)       | 1 (0 to 1)       | 79% (55.6% to 99.5%)      |
| 11 | Czechia       | Environmental heat and cold exposure            | 2 (2 to 3)       | 2 (2 to 3)       | 0.2% (-5.2% to 5.4%)      |
| 12 | Czechia       | Executions and police conflict                  | 0 (0 to 0)       | 0 (0 to 0)       | NA                        |
| 13 | Czechia       | Exposure to forces of nature                    | 0 (0 to 0)       | 0 (0 to 0)       | NA                        |
| 14 | Czechia       | Falls                                           | 403 (327 to 501) | 324 (253 to 416) | -19.6% (-25.9% to -13.2%) |
| 15 | Czechia       | Fire, heat, and hot substances                  | 4 (2 to 7)       | 4 (2 to 7)       | -2.3% (-8.8% to 3.2%)     |
| 16 | Czechia       | Foreign body in eyes                            | 0 (0 to 0)       | 0 (0 to 0)       | 0.9% (0.4% to 1.8%)       |
| 17 | Czechia       | Foreign body in other body part                 | 3 (1 to 5)       | 3 (1 to 5)       | 0.1% (-5.4% to 5.8%)      |
| 18 | Czechia       | Motor vehicle road injuries                     | 178 (141 to 220) | 106 (82 to 134)  | -40.8% (-47.8% to -33.1%) |
| 19 | Czechia       | Motorcyclist road injuries                      | 27 (20 to 34)    | 25 (18 to 32)    | -7.2% (-20.8% to 7.8%)    |
| 20 | Czechia       | Non-venomous animal contact                     | 7 (4 to 12)      | 6 (3 to 10)      | -14% (-18.5% to -9.3%)    |
| 21 | Czechia       | Other exposure to mechanical forces             | 158 (99 to 245)  | 143 (88 to 224)  | -9.3% (-14.6% to -3.5%)   |
| 22 | Czechia       | Other road injuries                             | 2 (1 to 3)       | 2 (1 to 3)       | -4.6% (-15.8% to 8%)      |
| 23 | Czechia       | Other transport injuries                        | 8 (6 to 11)      | 7 (5 to 9)       | -16.1% (-22.2% to -9.3%)  |
| 24 | Czechia       | Other unintentional injuries                    | 40 (25 to 62)    | 32 (20 to 53)    | -18.6% (-26.7% to -10.7%) |
| 25 | Czechia       | Pedestrian road injuries                        | 35 (26 to 45)    | 30 (22 to 40)    | -14.1% (-24.1% to -3.5%)  |
| 26 | Czechia       | Physical violence by firearm                    | 0 (0 to 1)       | 1 (0 to 1)       | 61.2% (42.2% to 83%)      |
| 27 | Czechia       | Physical violence by other means                | 33 (23 to 46)    | 31 (21 to 43)    | -7.4% (-16.1% to 1%)      |
| 28 | Czechia       | Physical violence by sharp object               | 3 (2 to 5)       | 2 (1 to 4)       | -16.5% (-28.4% to -5.2%)  |
| 29 | Czechia       | Poisoning by carbon monoxide                    | 0 (0 to 0)       | 0 (0 to 0)       | 0.1% (-12.8% to 11.8%)    |
| 30 | Czechia       | Poisoning by other means                        | 1 (0 to 1)       | 1 (0 to 1)       | -5.1% (-14.5% to 3.5%)    |
| 31 | Czechia       | Pulmonary aspiration and foreign body in airway | 1 (1 to 2)       | 1 (1 to 2)       | -27.3% (-35.3% to -19.4%) |
| 32 | Czechia       | Self-harm by firearm                            | 1 (0 to 1)       | 1 (0 to 1)       | -4.5% (-16.1% to 10.3%)   |
| 33 | Czechia       | Self-harm by other specified means              | 4 (3 to 6)       | 3 (2 to 5)       | -19.8% (-24% to -15%)     |
| 34 | Czechia       | Unintentional firearm injuries                  | 1 (1 to 2)       | 1 (1 to 2)       | -2.8% (-11.3% to 6.3%)    |
| 35 | Czechia       | Venomous animal contact                         | 5 (2 to 9)       | 4 (2 to 8)       | -16.5% (-21.4% to -11.5%) |
| 36 | Côte d'Ivoire | Adverse effects of medical treatment            | 0 (0 to 0)       | 0 (0 to 0)       | 0% (0% to 0%)             |
| 37 | Côte d'Ivoire | Conflict and terrorism                          | 0 (0 to 1)       | 0 (0 to 0)       | NA                        |
| 38 | Côte d'Ivoire | Cyclist road injuries                           | 28 (18 to 41)    | 31 (19 to 45)    | 9.2% (1.7% to 17.8%)      |
| 39 | Côte d'Ivoire | Drowning                                        | 0 (0 to 0)       | 0 (0 to 0)       | -12.2% (-18.9% to -4.2%)  |
| 40 | Côte d'Ivoire | Environmental heat and cold exposure            | 0 (0 to 1)       | 0 (0 to 1)       | 1.6% (-3% to 8%)          |
| 41 | Côte d'Ivoire | Executions and police conflict                  | 0 (0 to 0)       | 0 (0 to 1)       | NA                        |
| 42 | Côte d'Ivoire | Exposure to forces of nature                    | 0 (0 to 0)       | 0 (0 to 0)       | NA                        |
| 43 | Côte d'Ivoire | Falls                                           | 20 (13 to 29)    | 21 (14 to 32)    | 7.7% (4.4% to 11.3%)      |
| 44 | Côte d'Ivoire | Fire, heat, and hot substances                  | 0 (0 to 0)       | 0 (0 to 0)       | -10.5% (-16% to -4.9%)    |
| 45 |               |                                                 |                  |                  |                           |
| 46 |               |                                                 |                  |                  |                           |

|    |                                       |                                                 |               |               |                           |
|----|---------------------------------------|-------------------------------------------------|---------------|---------------|---------------------------|
| 1  |                                       |                                                 |               |               |                           |
| 2  | Côte d'Ivoire                         | Foreign body in eyes                            | 0 (0 to 0)    | 0 (0 to 0)    | -0.2% (-0.6% to 0.1%)     |
| 3  | Côte d'Ivoire                         | Foreign body in other body part                 | 3 (1 to 7)    | 3 (1 to 8)    | 1.1% (-3.6% to 5.5%)      |
| 4  | Côte d'Ivoire                         | Motor vehicle road injuries                     | 54 (38 to 76) | 55 (38 to 76) | 1.7% (-5.6% to 9.5%)      |
| 5  | Côte d'Ivoire                         | Motorcyclist road injuries                      | 27 (19 to 36) | 27 (19 to 37) | 0.2% (-7.4% to 8.4%)      |
| 6  | Côte d'Ivoire                         | Non-venomous animal contact                     | 3 (1 to 6)    | 3 (1 to 5)    | -8.2% (-13.1% to -3.2%)   |
| 7  | Côte d'Ivoire                         | Other exposure to mechanical forces             | 26 (13 to 47) | 24 (12 to 43) | -9.3% (-14.2% to -4.5%)   |
| 8  | Côte d'Ivoire                         | Other road injuries                             | 2 (1 to 4)    | 2 (1 to 4)    | 6.1% (-2.5% to 15%)       |
| 9  | Côte d'Ivoire                         | Other transport injuries                        | 3 (2 to 4)    | 3 (2 to 4)    | -3.2% (-9.2% to 2.3%)     |
| 10 | Côte d'Ivoire                         | Other unintentional injuries                    | 3 (2 to 5)    | 2 (1 to 4)    | -10% (-15.2% to -5.2%)    |
| 11 | Côte d'Ivoire                         | Pedestrian road injuries                        | 61 (45 to 80) | 59 (43 to 77) | -3.8% (-10% to 3%)        |
| 12 | Côte d'Ivoire                         | Physical violence by firearm                    | 0 (0 to 0)    | 0 (0 to 0)    | 5.7% (-5.8% to 19%)       |
| 13 | Côte d'Ivoire                         | Physical violence by other means                | 10 (7 to 15)  | 10 (7 to 15)  | -3.3% (-8.2% to 1.5%)     |
| 14 | Côte d'Ivoire                         | Physical violence by sharp object               | 3 (1 to 5)    | 2 (1 to 4)    | -6% (-13% to 0.8%)        |
| 15 | Côte d'Ivoire                         | Poisoning by carbon monoxide                    | 0 (0 to 0)    | 0 (0 to 0)    | 6.7% (-2.2% to 16.9%)     |
| 16 | Côte d'Ivoire                         | Poisoning by other means                        | 0 (0 to 0)    | 0 (0 to 0)    | -14.5% (-20.9% to -7.3%)  |
| 17 | Côte d'Ivoire                         | Pulmonary aspiration and foreign body in airway | 0 (0 to 0)    | 0 (0 to 0)    | -8.9% (-18.3% to 0.4%)    |
| 18 | Côte d'Ivoire                         | Self-harm by firearm                            | 0 (0 to 0)    | 0 (0 to 0)    | -0.5% (-7.5% to 6.8%)     |
| 19 | Côte d'Ivoire                         | Self-harm by other specified means              | 0 (0 to 0)    | 0 (0 to 0)    | -0.2% (-6.1% to 5.8%)     |
| 20 | Côte d'Ivoire                         | Unintentional firearm injuries                  | 1 (0 to 2)    | 1 (0 to 2)    | -10.1% (-17.2% to -2.5%)  |
| 21 | Côte d'Ivoire                         | Venomous animal contact                         | 0 (0 to 1)    | 0 (0 to 1)    | -7.9% (-15.1% to -0.9%)   |
| 22 | Democratic People's Republic of Korea | Adverse effects of medical treatment            | 0 (0 to 0)    | 0 (0 to 0)    | 0% (0% to 0%)             |
| 23 | Democratic People's Republic of Korea | Conflict and terrorism                          | 0 (0 to 0)    | 0 (0 to 0)    | NA                        |
| 24 | Democratic People's Republic of Korea | Cyclist road injuries                           | 15 (11 to 21) | 21 (15 to 29) | 39.2% (27.9% to 52%)      |
| 25 | Democratic People's Republic of Korea | Drowning                                        | 1 (0 to 1)    | 0 (0 to 1)    | -29.4% (-38.1% to -19.2%) |
| 26 | Democratic People's Republic of Korea | Environmental heat and cold exposure            | 2 (1 to 3)    | 2 (1 to 3)    | 4.1% (-1.3% to 9.5%)      |
| 27 | Democratic People's Republic of Korea | Executions and police conflict                  | 0 (0 to 0)    | 0 (0 to 0)    | NA                        |
| 28 | Democratic People's Republic of Korea | Exposure to forces of nature                    | 0 (0 to 0)    | 0 (0 to 0)    | NA                        |
| 29 | Democratic People's Republic of Korea | Falls                                           | 58 (46 to 75) | 36 (28 to 47) | -38.1% (-40.2% to -35.8%) |
| 30 | Democratic People's Republic of Korea | Fire, heat, and hot substances                  | 1 (0 to 1)    | 1 (0 to 1)    | -13.8% (-19.6% to -8.5%)  |
| 31 | Democratic People's Republic of Korea | Foreign body in eyes                            | 0 (0 to 0)    | 0 (0 to 0)    | 3.9% (2.6% to 5.7%)       |
| 32 | Democratic People's Republic of Korea | Foreign body in other body part                 | 0 (0 to 1)    | 0 (0 to 1)    | -3.2% (-9.4% to 3.5%)     |
| 33 | Democratic People's Republic of Korea | Motor vehicle road injuries                     | 13 (10 to 18) | 15 (11 to 20) | 16.5% (6.4% to 27.1%)     |
| 34 | Democratic People's Republic of Korea | Motorcyclist road injuries                      | 20 (16 to 26) | 29 (23 to 37) | 44.5% (32.3% to 57%)      |
| 35 | Democratic People's Republic of Korea | Non-venomous animal contact                     | 2 (1 to 4)    | 2 (1 to 3)    | -14.8% (-19.1% to -9.8%)  |
| 36 | Democratic People's Republic of Korea | Other exposure to mechanical forces             | 5 (3 to 9)    | 7 (4 to 12)   | 41.4% (31.8% to 54%)      |
| 37 | Democratic People's Republic of Korea | Other road injuries                             | 1 (0 to 2)    | 1 (1 to 2)    | 12.1% (1.5% to 23.9%)     |
| 38 | Democratic People's Republic of Korea | Other transport injuries                        | 6 (4 to 8)    | 5 (4 to 7)    | -8.5% (-12.8% to -3.7%)   |
| 39 | Democratic People's Republic of Korea | Other unintentional injuries                    | 4 (3 to 6)    | 4 (3 to 7)    | 3.6% (-1.7% to 10.5%)     |
| 40 | Democratic People's Republic of Korea | Pedestrian road injuries                        | 14 (10 to 17) | 16 (12 to 20) | 18.4% (9.5% to 28.5%)     |
| 41 | Democratic People's Republic of Korea | Physical violence by firearm                    | 0 (0 to 0)    | 0 (0 to 0)    | -1% (-13.3% to 11.9%)     |
| 42 | Democratic People's Republic of Korea | Physical violence by other means                | 15 (11 to 22) | 18 (13 to 25) | 16.7% (9.2% to 25.4%)     |
| 43 | Democratic People's Republic of Korea | Physical violence by sharp object               | 3 (2 to 5)    | 3 (2 to 5)    | -0.4% (-10.2% to 9.8%)    |
| 44 | Democratic People's Republic of Korea | Poisoning by carbon monoxide                    | 0 (0 to 0)    | 0 (0 to 0)    | 15.6% (5.6% to 28.1%)     |
| 45 |                                       |                                                 |               |               |                           |
| 46 |                                       |                                                 |               |               |                           |

|    |                                       |                                                 |                  |                  |                           |
|----|---------------------------------------|-------------------------------------------------|------------------|------------------|---------------------------|
| 1  |                                       |                                                 |                  |                  |                           |
| 2  | Democratic People's Republic of Korea | Poisoning by other means                        | 0 (0 to 0)       | 0 (0 to 0)       | -10.1% (-17.1% to -1.3%)  |
| 3  | Democratic People's Republic of Korea | Pulmonary aspiration and foreign body in airway | 0 (0 to 0)       | 0 (0 to 0)       | 17.2% (1% to 36.1%)       |
| 4  | Democratic People's Republic of Korea | Self-harm by firearm                            | 1 (0 to 1)       | 0 (0 to 1)       | -23.8% (-32% to -13.8%)   |
| 5  | Democratic People's Republic of Korea | Self-harm by other specified means              | 2 (1 to 4)       | 1 (1 to 2)       | -40.1% (-44% to -36.2%)   |
| 6  | Democratic People's Republic of Korea | Unintentional firearm injuries                  | 1 (1 to 2)       | 1 (1 to 2)       | -6% (-15% to 2.6%)        |
| 7  | Democratic People's Republic of Korea | Venomous animal contact                         | 1 (0 to 1)       | 1 (0 to 1)       | -8.4% (-14.4% to -0.8%)   |
| 8  | Democratic Republic of the Congo      | Adverse effects of medical treatment            | 0 (0 to 0)       | 0 (0 to 0)       | 0% (0% to 0%)             |
| 9  | Democratic Republic of the Congo      | Conflict and terrorism                          | 2 (1 to 7)       | 11 (5 to 26)     | NA                        |
| 10 | Democratic Republic of the Congo      | Cyclist road injuries                           | 21 (14 to 30)    | 19 (13 to 27)    | -8.8% (-15% to -2.8%)     |
| 11 | Democratic Republic of the Congo      | Drowning                                        | 0 (0 to 0)       | 0 (0 to 0)       | -25.3% (-32.8% to -17.8%) |
| 12 | Democratic Republic of the Congo      | Environmental heat and cold exposure            | 2 (1 to 3)       | 2 (1 to 3)       | -2.4% (-7.9% to 3.2%)     |
| 13 | Democratic Republic of the Congo      | Executions and police conflict                  | 0 (0 to 0)       | 0 (0 to 1)       | NA                        |
| 14 | Democratic Republic of the Congo      | Exposure to forces of nature                    | 0 (0 to 0)       | 0 (0 to 0)       | NA                        |
| 15 | Democratic Republic of the Congo      | Falls                                           | 37 (29 to 47)    | 44 (35 to 56)    | 18.9% (14.6% to 23.3%)    |
| 16 | Democratic Republic of the Congo      | Fire, heat, and hot substances                  | 1 (1 to 2)       | 1 (0 to 1)       | -9% (-14.5% to -4%)       |
| 17 | Democratic Republic of the Congo      | Foreign body in eyes                            | 0 (0 to 0)       | 0 (0 to 0)       | 0% (-1% to 0.9%)          |
| 18 | Democratic Republic of the Congo      | Foreign body in other body part                 | 4 (2 to 7)       | 3 (2 to 7)       | -8% (-13.4% to -2.8%)     |
| 19 | Democratic Republic of the Congo      | Motor vehicle road injuries                     | 47 (36 to 60)    | 40 (31 to 52)    | -13.9% (-20% to -7.8%)    |
| 20 | Democratic Republic of the Congo      | Motorcyclist road injuries                      | 8 (6 to 10)      | 7 (5 to 9)       | -11% (-19.7% to -2.2%)    |
| 21 | Democratic Republic of the Congo      | Non-venomous animal contact                     | 7 (4 to 12)      | 8 (5 to 13)      | 5.7% (0.5% to 10.5%)      |
| 22 | Democratic Republic of the Congo      | Other exposure to mechanical forces             | 14 (8 to 23)     | 13 (8 to 22)     | -5.8% (-11.3% to -0.9%)   |
| 23 | Democratic Republic of the Congo      | Other road injuries                             | 1 (1 to 3)       | 1 (1 to 2)       | -1.8% (-10% to 7.3%)      |
| 24 | Democratic Republic of the Congo      | Other transport injuries                        | 5 (4 to 7)       | 5 (4 to 7)       | 2.6% (-3.1% to 8.8%)      |
| 25 | Democratic Republic of the Congo      | Other unintentional injuries                    | 7 (5 to 11)      | 7 (4 to 11)      | -3.4% (-9.5% to 3.4%)     |
| 26 | Democratic Republic of the Congo      | Pedestrian road injuries                        | 44 (34 to 55)    | 41 (31 to 51)    | -6.5% (-11.9% to -1.1%)   |
| 27 | Democratic Republic of the Congo      | Physical violence by firearm                    | 0 (0 to 0)       | 0 (0 to 0)       | 2.3% (-6.8% to 12.9%)     |
| 28 | Democratic Republic of the Congo      | Physical violence by other means                | 5 (3 to 7)       | 4 (3 to 6)       | -8.8% (-14.3% to -3.1%)   |
| 29 | Democratic Republic of the Congo      | Physical violence by sharp object               | 2 (1 to 3)       | 2 (1 to 3)       | -5.3% (-13.1% to 3.2%)    |
| 30 | Democratic Republic of the Congo      | Poisoning by carbon monoxide                    | 0 (0 to 0)       | 0 (0 to 0)       | 7% (-3.8% to 19%)         |
| 31 | Democratic Republic of the Congo      | Poisoning by other means                        | 0 (0 to 0)       | 0 (0 to 0)       | -18.1% (-24.6% to -11.5%) |
| 32 | Democratic Republic of the Congo      | Pulmonary aspiration and foreign body in airway | 0 (0 to 1)       | 0 (0 to 1)       | -13.9% (-22.2% to -3%)    |
| 33 | Democratic Republic of the Congo      | Self-harm by firearm                            | 0 (0 to 0)       | 0 (0 to 0)       | 14.3% (1.6% to 31.3%)     |
| 34 | Democratic Republic of the Congo      | Self-harm by other specified means              | 1 (1 to 2)       | 1 (1 to 2)       | 1.4% (-4% to 6.7%)        |
| 35 | Democratic Republic of the Congo      | Unintentional firearm injuries                  | 1 (1 to 2)       | 1 (1 to 2)       | -9.6% (-16.2% to -2.4%)   |
| 36 | Democratic Republic of the Congo      | Venomous animal contact                         | 1 (0 to 3)       | 2 (0 to 4)       | 11.3% (4% to 20.1%)       |
| 37 | Denmark                               | Adverse effects of medical treatment            | 0 (0 to 0)       | 0 (0 to 0)       | 0% (0% to 0%)             |
| 38 | Denmark                               | Conflict and terrorism                          | 0 (0 to 0)       | 0 (0 to 0)       | NA                        |
| 39 | Denmark                               | Cyclist road injuries                           | 37 (28 to 48)    | 19 (13 to 25)    | -49% (-57.1% to -41.2%)   |
| 40 | Denmark                               | Drowning                                        | 0 (0 to 0)       | 0 (0 to 0)       | 72.2% (56.3% to 89.4%)    |
| 41 | Denmark                               | Environmental heat and cold exposure            | 2 (1 to 3)       | 2 (1 to 3)       | 1.3% (-2.4% to 5.4%)      |
| 42 | Denmark                               | Executions and police conflict                  | 0 (0 to 0)       | 0 (0 to 0)       | NA                        |
| 43 | Denmark                               | Exposure to forces of nature                    | 0 (0 to 0)       | 0 (0 to 0)       | NA                        |
| 44 | Denmark                               | Falls                                           | 306 (246 to 379) | 259 (198 to 333) | -15.3% (-21.6% to -8.4%)  |
| 45 |                                       |                                                 |                  |                  |                           |
| 46 |                                       |                                                 |                  |                  |                           |

|    |          |                                                 |                |               |                           |
|----|----------|-------------------------------------------------|----------------|---------------|---------------------------|
| 1  |          |                                                 |                |               |                           |
| 2  | Denmark  | Fire, heat, and hot substances                  | 3 (2 to 4)     | 2 (1 to 4)    | -13.7% (-19.1% to -8.2%)  |
| 3  | Denmark  | Foreign body in eyes                            | 0 (0 to 0)     | 0 (0 to 0)    | 0.4% (0.1% to 0.9%)       |
| 4  | Denmark  | Foreign body in other body part                 | 2 (1 to 3)     | 2 (1 to 3)    | 0.8% (-3.7% to 5.7%)      |
| 5  | Denmark  | Motor vehicle road injuries                     | 34 (27 to 43)  | 18 (14 to 24) | -46.6% (-54.6% to -38.7%) |
| 6  | Denmark  | Motorcyclist road injuries                      | 9 (7 to 12)    | 7 (5 to 10)   | -22.1% (-35% to -6.9%)    |
| 7  | Denmark  | Non-venomous animal contact                     | 2 (1 to 4)     | 2 (1 to 4)    | -4.7% (-8.5% to -0.3%)    |
| 8  | Denmark  | Other exposure to mechanical forces             | 47 (29 to 74)  | 44 (26 to 70) | -7.2% (-14.4% to -0.9%)   |
| 9  | Denmark  | Other road injuries                             | 1 (1 to 2)     | 1 (1 to 2)    | -4.2% (-18.5% to 11.7%)   |
| 10 | Denmark  | Other transport injuries                        | 5 (4 to 7)     | 5 (3 to 6)    | -14.8% (-22.2% to -7%)    |
| 11 | Denmark  | Other unintentional injuries                    | 28 (18 to 43)  | 22 (14 to 36) | -21.3% (-29.2% to -14.8%) |
| 12 | Denmark  | Pedestrian road injuries                        | 8 (6 to 11)    | 6 (4 to 8)    | -26.8% (-39.3% to -13%)   |
| 13 | Denmark  | Physical violence by firearm                    | 0 (0 to 1)     | 1 (0 to 1)    | 36.1% (21.1% to 52.9%)    |
| 14 | Denmark  | Physical violence by other means                | 17 (12 to 24)  | 13 (9 to 20)  | -19.9% (-27.7% to -12%)   |
| 15 | Denmark  | Physical violence by sharp object               | 2 (1 to 3)     | 1 (1 to 2)    | -13.8% (-25.4% to -3.6%)  |
| 16 | Denmark  | Poisoning by carbon monoxide                    | 0 (0 to 0)     | 0 (0 to 0)    | 17.3% (7.5% to 28.2%)     |
| 17 | Denmark  | Poisoning by other means                        | 0 (0 to 0)     | 0 (0 to 0)    | -1.3% (-7.3% to 5.4%)     |
| 18 | Denmark  | Pulmonary aspiration and foreign body in airway | 1 (1 to 2)     | 1 (0 to 2)    | -5% (-13.8% to 4%)        |
| 19 | Denmark  | Self-harm by firearm                            | 1 (0 to 1)     | 0 (0 to 1)    | -50.8% (-57.9% to -42.9%) |
| 20 | Denmark  | Self-harm by other specified means              | 5 (3 to 7)     | 2 (1 to 3)    | -53.6% (-56.7% to -50.4%) |
| 21 | Denmark  | Unintentional firearm injuries                  | 1 (1 to 2)     | 1 (1 to 2)    | 3.5% (-7.1% to 14%)       |
| 22 | Denmark  | Venomous animal contact                         | 1 (0 to 2)     | 1 (0 to 2)    | -6.6% (-11.7% to -1.5%)   |
| 23 | Djibouti | Adverse effects of medical treatment            | 0 (0 to 0)     | 0 (0 to 0)    | 0% (0% to 0%)             |
| 24 | Djibouti | Conflict and terrorism                          | 55 (17 to 139) | 0 (0 to 0)    | NA                        |
| 25 | Djibouti | Cyclist road injuries                           | 31 (20 to 47)  | 34 (22 to 50) | 9.3% (1.5% to 17.2%)      |
| 26 | Djibouti | Drowning                                        | 0 (0 to 0)     | 0 (0 to 0)    | -9.6% (-16.6% to -2.1%)   |
| 27 | Djibouti | Environmental heat and cold exposure            | 0 (0 to 1)     | 0 (0 to 1)    | -6.4% (-13.3% to -0.1%)   |
| 28 | Djibouti | Executions and police conflict                  | 0 (0 to 0)     | 1 (0 to 2)    | NA                        |
| 29 | Djibouti | Exposure to forces of nature                    | 0 (0 to 0)     | 0 (0 to 0)    | NA                        |
| 30 | Djibouti | Falls                                           | 23 (15 to 36)  | 27 (18 to 43) | 18.5% (13.8% to 24%)      |
| 31 | Djibouti | Fire, heat, and hot substances                  | 0 (0 to 1)     | 0 (0 to 1)    | -15.3% (-20.7% to -10.4%) |
| 32 | Djibouti | Foreign body in eyes                            | 0 (0 to 0)     | 0 (0 to 0)    | 0.4% (-0.1% to 1.1%)      |
| 33 | Djibouti | Foreign body in other body part                 | 3 (1 to 7)     | 3 (1 to 7)    | 4.5% (-1.4% to 10.6%)     |
| 34 | Djibouti | Motor vehicle road injuries                     | 49 (33 to 69)  | 46 (30 to 64) | -7% (-13.6% to 0.5%)      |
| 35 | Djibouti | Motorcyclist road injuries                      | 20 (14 to 28)  | 23 (16 to 32) | 15.9% (7.3% to 24.8%)     |
| 36 | Djibouti | Non-venomous animal contact                     | 5 (2 to 10)    | 5 (2 to 10)   | -4% (-8.6% to 0.9%)       |
| 37 | Djibouti | Other exposure to mechanical forces             | 33 (17 to 58)  | 29 (15 to 53) | -10.8% (-16% to -5.5%)    |
| 38 | Djibouti | Other road injuries                             | 1 (1 to 3)     | 2 (1 to 3)    | 10.1% (0.8% to 19.5%)     |
| 39 | Djibouti | Other transport injuries                        | 3 (2 to 4)     | 3 (2 to 4)    | -3.5% (-8.8% to 2%)       |
| 40 | Djibouti | Other unintentional injuries                    | 3 (2 to 5)     | 2 (1 to 4)    | -12.6% (-17.8% to -6.2%)  |
| 41 | Djibouti | Pedestrian road injuries                        | 74 (54 to 96)  | 63 (47 to 83) | -14.4% (-19.7% to -8.5%)  |
| 42 | Djibouti | Physical violence by firearm                    | 0 (0 to 0)     | 0 (0 to 0)    | 42.3% (26.9% to 61.9%)    |
| 43 | Djibouti | Physical violence by other means                | 10 (7 to 16)   | 10 (7 to 16)  | -0.3% (-6.6% to 7%)       |
| 44 | Djibouti | Physical violence by sharp object               | 3 (1 to 5)     | 3 (1 to 5)    | 3.5% (-4.9% to 12.3%)     |
| 45 |          |                                                 |                |               |                           |
| 46 |          |                                                 |                |               |                           |

|    |                    |                                                 |               |               |                           |
|----|--------------------|-------------------------------------------------|---------------|---------------|---------------------------|
| 1  |                    |                                                 |               |               |                           |
| 2  | Djibouti           | Poisoning by carbon monoxide                    | 0 (0 to 0)    | 0 (0 to 0)    | 13.6% (1.9% to 26.9%)     |
| 3  | Djibouti           | Poisoning by other means                        | 0 (0 to 0)    | 0 (0 to 0)    | -19.9% (-26.7% to -12.1%) |
| 4  | Djibouti           | Pulmonary aspiration and foreign body in airway | 0 (0 to 0)    | 0 (0 to 0)    | -11.3% (-20.3% to -0.4%)  |
| 5  | Djibouti           | Self-harm by firearm                            | 0 (0 to 0)    | 0 (0 to 0)    | 32.1% (22.1% to 45.2%)    |
| 6  | Djibouti           | Self-harm by other specified means              | 0 (0 to 0)    | 0 (0 to 0)    | 10.9% (4.7% to 17.7%)     |
| 7  | Djibouti           | Unintentional firearm injuries                  | 1 (0 to 2)    | 1 (0 to 2)    | -18.7% (-25.5% to -10.9%) |
| 8  | Djibouti           | Venomous animal contact                         | 1 (0 to 3)    | 1 (0 to 2)    | -9.3% (-16.1% to -3.2%)   |
| 9  | Dominica           | Adverse effects of medical treatment            | 0 (0 to 0)    | 0 (0 to 0)    | 0% (0% to 0%)             |
| 10 | Dominica           | Conflict and terrorism                          | 0 (0 to 0)    | 0 (0 to 0)    | NA                        |
| 11 | Dominica           | Cyclist road injuries                           | 31 (22 to 43) | 28 (19 to 38) | -11.3% (-19.5% to -3.3%)  |
| 12 | Dominica           | Drowning                                        | 0 (0 to 1)    | 0 (0 to 1)    | 5.7% (-3.1% to 14.9%)     |
| 13 | Dominica           | Environmental heat and cold exposure            | 11 (8 to 15)  | 11 (8 to 16)  | 4.6% (0.6% to 9.5%)       |
| 14 | Dominica           | Executions and police conflict                  | 0 (0 to 0)    | 0 (0 to 0)    | NA                        |
| 15 | Dominica           | Exposure to forces of nature                    | 0 (0 to 0)    | 0 (0 to 0)    | NA                        |
| 16 | Dominica           | Falls                                           | 44 (34 to 57) | 58 (45 to 75) | 32.8% (27.3% to 37.6%)    |
| 17 | Dominica           | Fire, heat, and hot substances                  | 4 (3 to 7)    | 4 (2 to 6)    | -6.6% (-11% to -2.1%)     |
| 18 | Dominica           | Foreign body in eyes                            | 0 (0 to 0)    | 0 (0 to 0)    | 1.7% (0.6% to 3.5%)       |
| 19 | Dominica           | Foreign body in other body part                 | 1 (1 to 3)    | 1 (1 to 3)    | -2.8% (-7.8% to 4.1%)     |
| 20 | Dominica           | Motor vehicle road injuries                     | 33 (25 to 44) | 30 (22 to 39) | -11.7% (-20.4% to -2.3%)  |
| 21 | Dominica           | Motorcyclist road injuries                      | 22 (17 to 29) | 26 (20 to 34) | 19.4% (6.3% to 33.2%)     |
| 22 | Dominica           | Non-venomous animal contact                     | 3 (2 to 6)    | 3 (2 to 5)    | -11.9% (-17% to -6%)      |
| 23 | Dominica           | Other exposure to mechanical forces             | 30 (18 to 50) | 36 (21 to 59) | 18.1% (11.6% to 25%)      |
| 24 | Dominica           | Other road injuries                             | 4 (2 to 7)    | 4 (2 to 6)    | -7.1% (-15.5% to 2.1%)    |
| 25 | Dominica           | Other transport injuries                        | 4 (3 to 6)    | 5 (3 to 6)    | 4.1% (-2.7% to 11.5%)     |
| 26 | Dominica           | Other unintentional injuries                    | 15 (9 to 23)  | 14 (9 to 23)  | -2.4% (-8% to 3.3%)       |
| 27 | Dominica           | Pedestrian road injuries                        | 19 (14 to 24) | 15 (11 to 19) | -21.7% (-28.8% to -14.8%) |
| 28 | Dominica           | Physical violence by firearm                    | 1 (0 to 1)    | 1 (1 to 2)    | 97.2% (75.5% to 126.1%)   |
| 29 | Dominica           | Physical violence by other means                | 10 (7 to 15)  | 13 (9 to 19)  | 32.4% (23.8% to 43.7%)    |
| 30 | Dominica           | Physical violence by sharp object               | 4 (3 to 6)    | 6 (4 to 9)    | 42.5% (29% to 60.2%)      |
| 31 | Dominica           | Poisoning by carbon monoxide                    | 0 (0 to 0)    | 0 (0 to 0)    | 2.3% (-11.1% to 17%)      |
| 32 | Dominica           | Poisoning by other means                        | 0 (0 to 1)    | 0 (0 to 0)    | -55.4% (-61.2% to -48.9%) |
| 33 | Dominica           | Pulmonary aspiration and foreign body in airway | 0 (0 to 1)    | 0 (0 to 1)    | -16.1% (-24.8% to -8%)    |
| 34 | Dominica           | Self-harm by firearm                            | 0 (0 to 0)    | 0 (0 to 0)    | 9.1% (-2.9% to 22.7%)     |
| 35 | Dominica           | Self-harm by other specified means              | 0 (0 to 1)    | 0 (0 to 1)    | -0.7% (-7.8% to 6.5%)     |
| 36 | Dominica           | Unintentional firearm injuries                  | 4 (2 to 6)    | 4 (2 to 6)    | 13.1% (3.1% to 23.8%)     |
| 37 | Dominica           | Venomous animal contact                         | 5 (3 to 10)   | 5 (2 to 9)    | -11.3% (-15.9% to -6.3%)  |
| 38 | Dominican Republic | Adverse effects of medical treatment            | 0 (0 to 0)    | 0 (0 to 0)    | 0% (0% to 0%)             |
| 39 | Dominican Republic | Conflict and terrorism                          | 0 (0 to 1)    | 0 (0 to 0)    | NA                        |
| 40 | Dominican Republic | Cyclist road injuries                           | 31 (22 to 43) | 29 (20 to 41) | -5.8% (-16.5% to 4.7%)    |
| 41 | Dominican Republic | Drowning                                        | 0 (0 to 0)    | 0 (0 to 1)    | 46.8% (30.6% to 65.9%)    |
| 42 | Dominican Republic | Environmental heat and cold exposure            | 10 (7 to 15)  | 11 (8 to 16)  | 7.7% (3.4% to 12%)        |
| 43 | Dominican Republic | Executions and police conflict                  | 0 (0 to 0)    | 0 (0 to 0)    | NA                        |
| 44 | Dominican Republic | Exposure to forces of nature                    | 0 (0 to 0)    | 0 (0 to 0)    | NA                        |
| 45 |                    |                                                 |               |               |                           |
| 46 |                    |                                                 |               |               |                           |

|    |                    |                                                 |                |                 |                           |
|----|--------------------|-------------------------------------------------|----------------|-----------------|---------------------------|
| 1  |                    |                                                 |                |                 |                           |
| 2  | Dominican Republic | Falls                                           | 38 (30 to 49)  | 61 (47 to 80)   | 60.8% (55.3% to 66.6%)    |
| 3  | Dominican Republic | Fire, heat, and hot substances                  | 3 (2 to 6)     | 4 (2 to 6)      | 4.5% (-0.5% to 9.5%)      |
| 4  | Dominican Republic | Foreign body in eyes                            | 0 (0 to 0)     | 0 (0 to 0)      | 0.6% (0.1% to 1.3%)       |
| 5  | Dominican Republic | Foreign body in other body part                 | 1 (1 to 3)     | 1 (1 to 3)      | -4.9% (-10.4% to 1.1%)    |
| 6  | Dominican Republic | Motor vehicle road injuries                     | 48 (37 to 62)  | 67 (51 to 84)   | 38.5% (24% to 54.6%)      |
| 7  | Dominican Republic | Motorcyclist road injuries                      | 18 (14 to 24)  | 35 (27 to 46)   | 91.1% (68.6% to 119.8%)   |
| 8  | Dominican Republic | Non-venomous animal contact                     | 3 (2 to 6)     | 3 (2 to 5)      | -17.1% (-21.3% to -12.2%) |
| 9  | Dominican Republic | Other exposure to mechanical forces             | 30 (17 to 50)  | 40 (23 to 68)   | 36.2% (28.4% to 44.9%)    |
| 10 | Dominican Republic | Other road injuries                             | 4 (3 to 7)     | 4 (2 to 7)      | -0.7% (-12.3% to 11.7%)   |
| 11 | Dominican Republic | Other transport injuries                        | 5 (3 to 6)     | 5 (3 to 6)      | 1.1% (-4.7% to 7%)        |
| 12 | Dominican Republic | Other unintentional injuries                    | 17 (11 to 27)  | 18 (12 to 28)   | 3.1% (-3.6% to 11%)       |
| 13 | Dominican Republic | Pedestrian road injuries                        | 15 (11 to 19)  | 15 (11 to 19)   | 2.6% (-7.8% to 14.5%)     |
| 14 | Dominican Republic | Physical violence by firearm                    | 1 (1 to 1)     | 3 (2 to 5)      | 329% (264.4% to 405.6%)   |
| 15 | Dominican Republic | Physical violence by other means                | 11 (8 to 17)   | 17 (12 to 25)   | 48.7% (33.5% to 63.4%)    |
| 16 | Dominican Republic | Physical violence by sharp object               | 5 (3 to 7)     | 8 (5 to 12)     | 69.3% (48.7% to 93.2%)    |
| 17 | Dominican Republic | Poisoning by carbon monoxide                    | 0 (0 to 0)     | 0 (0 to 0)      | 34.4% (20.1% to 50.5%)    |
| 18 | Dominican Republic | Poisoning by other means                        | 0 (0 to 0)     | 0 (0 to 0)      | 11.5% (3.5% to 18.8%)     |
| 19 | Dominican Republic | Pulmonary aspiration and foreign body in airway | 0 (0 to 1)     | 0 (0 to 1)      | -26.8% (-35% to -18.9%)   |
| 20 | Dominican Republic | Self-harm by firearm                            | 0 (0 to 0)     | 0 (0 to 1)      | 84% (64.8% to 106.5%)     |
| 21 | Dominican Republic | Self-harm by other specified means              | 0 (0 to 1)     | 0 (0 to 1)      | 39.7% (29.7% to 50.7%)    |
| 22 | Dominican Republic | Unintentional firearm injuries                  | 5 (3 to 7)     | 7 (4 to 11)     | 54.9% (42.1% to 71.5%)    |
| 23 | Dominican Republic | Venomous animal contact                         | 6 (3 to 10)    | 5 (2 to 9)      | -15.8% (-19.8% to -10.8%) |
| 24 | Ecuador            | Adverse effects of medical treatment            | 0 (0 to 0)     | 0 (0 to 0)      | 0% (0% to 0%)             |
| 25 | Ecuador            | Conflict and terrorism                          | 0 (0 to 1)     | 0 (0 to 0)      | NA                        |
| 26 | Ecuador            | Cyclist road injuries                           | 14 (9 to 19)   | 15 (10 to 20)   | 6.3% (-3.2% to 17.5%)     |
| 27 | Ecuador            | Drowning                                        | 0 (0 to 0)     | 0 (0 to 1)      | 17.5% (3.6% to 32.9%)     |
| 28 | Ecuador            | Environmental heat and cold exposure            | 8 (6 to 11)    | 8 (6 to 12)     | 6% (1.9% to 11.6%)        |
| 29 | Ecuador            | Executions and police conflict                  | 0 (0 to 0)     | 0 (0 to 0)      | NA                        |
| 30 | Ecuador            | Exposure to forces of nature                    | 0 (0 to 0)     | 0 (0 to 0)      | NA                        |
| 31 | Ecuador            | Falls                                           | 80 (63 to 103) | 109 (85 to 140) | 36.2% (30.5% to 42.2%)    |
| 32 | Ecuador            | Fire, heat, and hot substances                  | 3 (2 to 5)     | 3 (2 to 5)      | -6.3% (-12.7% to -0.1%)   |
| 33 | Ecuador            | Foreign body in eyes                            | 0 (0 to 0)     | 0 (0 to 0)      | -0.2% (-0.7% to 0.1%)     |
| 34 | Ecuador            | Foreign body in other body part                 | 2 (1 to 5)     | 2 (1 to 5)      | -8.5% (-16.5% to -0.4%)   |
| 35 | Ecuador            | Motor vehicle road injuries                     | 17 (12 to 22)  | 21 (16 to 28)   | 29.2% (16.9% to 44.8%)    |
| 36 | Ecuador            | Motorcyclist road injuries                      | 7 (5 to 9)     | 15 (11 to 19)   | 119.9% (91.5% to 153%)    |
| 37 | Ecuador            | Non-venomous animal contact                     | 3 (2 to 6)     | 3 (2 to 5)      | -8.3% (-13.4% to -2.7%)   |
| 38 | Ecuador            | Other exposure to mechanical forces             | 32 (19 to 51)  | 31 (18 to 50)   | -2.6% (-9.9% to 4.6%)     |
| 39 | Ecuador            | Other road injuries                             | 3 (2 to 5)     | 3 (2 to 5)      | 2.2% (-8.4% to 15.7%)     |
| 40 | Ecuador            | Other transport injuries                        | 4 (3 to 5)     | 5 (4 to 6)      | 26.6% (15.6% to 40.3%)    |
| 41 | Ecuador            | Other unintentional injuries                    | 21 (14 to 32)  | 16 (11 to 26)   | -20.7% (-27% to -14.5%)   |
| 42 | Ecuador            | Pedestrian road injuries                        | 32 (25 to 39)  | 22 (17 to 27)   | -31.2% (-36.8% to -24.8%) |
| 43 | Ecuador            | Physical violence by firearm                    | 1 (1 to 1)     | 1 (1 to 2)      | 35.3% (12.9% to 62.4%)    |
| 44 | Ecuador            | Physical violence by other means                | 12 (8 to 17)   | 12 (8 to 18)    | 2.4% (-9.1% to 15.1%)     |
| 45 |                    |                                                 |                |                 |                           |
| 46 |                    |                                                 |                |                 |                           |

|    |             |                                                 |                 |               |                           |
|----|-------------|-------------------------------------------------|-----------------|---------------|---------------------------|
| 1  |             |                                                 |                 |               |                           |
| 2  | Ecuador     | Physical violence by sharp object               | 5 (4 to 8)      | 4 (3 to 7)    | -20.7% (-32.2% to -9.2%)  |
| 3  | Ecuador     | Poisoning by carbon monoxide                    | 0 (0 to 0)      | 0 (0 to 0)    | 47.4% (28.9% to 66.5%)    |
| 4  | Ecuador     | Poisoning by other means                        | 0 (0 to 0)      | 0 (0 to 0)    | -5.2% (-12.2% to 2.6%)    |
| 5  | Ecuador     | Pulmonary aspiration and foreign body in airway | 1 (0 to 1)      | 1 (0 to 1)    | -27.7% (-36.2% to -20.1%) |
| 6  | Ecuador     | Self-harm by firearm                            | 0 (0 to 0)      | 0 (0 to 0)    | 54.6% (28.6% to 79.2%)    |
| 7  | Ecuador     | Self-harm by other specified means              | 0 (0 to 1)      | 1 (1 to 1)    | 100.3% (82.7% to 119.6%)  |
| 8  | Ecuador     | Unintentional firearm injuries                  | 3 (2 to 5)      | 3 (2 to 5)    | -12.6% (-21.8% to -2.5%)  |
| 9  | Egypt       | Venomous animal contact                         | 6 (3 to 10)     | 5 (3 to 10)   | -3.2% (-7.6% to 2.2%)     |
| 10 | Egypt       | Adverse effects of medical treatment            | 0 (0 to 0)      | 0 (0 to 0)    | 0% (0% to 0%)             |
| 11 | Egypt       | Conflict and terrorism                          | 0 (0 to 1)      | 4 (2 to 9)    | NA                        |
| 12 | Egypt       | Cyclist road injuries                           | 14 (9 to 20)    | 14 (9 to 20)  | -2.8% (-12.3% to 8.5%)    |
| 13 | Egypt       | Drowning                                        | 0 (0 to 0)      | 0 (0 to 0)    | 42.6% (18.8% to 69.5%)    |
| 14 | Egypt       | Environmental heat and cold exposure            | 3 (2 to 4)      | 3 (2 to 4)    | -2% (-7.8% to 3.8%)       |
| 15 | Egypt       | Executions and police conflict                  | 0 (0 to 0)      | 0 (0 to 0)    | NA                        |
| 16 | Egypt       | Exposure to forces of nature                    | 0 (0 to 0)      | 0 (0 to 0)    | NA                        |
| 17 | Egypt       | Falls                                           | 48 (36 to 63)   | 68 (52 to 91) | 43.1% (37.5% to 49%)      |
| 18 | Egypt       | Fire, heat, and hot substances                  | 1 (0 to 1)      | 1 (0 to 1)    | -15.3% (-22.7% to -7.5%)  |
| 19 | Egypt       | Foreign body in eyes                            | 0 (0 to 0)      | 0 (0 to 0)    | 1.5% (0.6% to 2.9%)       |
| 20 | Egypt       | Foreign body in other body part                 | 1 (1 to 3)      | 1 (1 to 3)    | 0.2% (-5.4% to 5.6%)      |
| 21 | Egypt       | Motor vehicle road injuries                     | 45 (35 to 57)   | 39 (30 to 49) | -14.2% (-21.5% to -6.7%)  |
| 22 | Egypt       | Motorcyclist road injuries                      | 12 (9 to 15)    | 13 (10 to 17) | 10% (-1.1% to 22%)        |
| 23 | Egypt       | Non-venomous animal contact                     | 3 (2 to 6)      | 3 (2 to 5)    | -6.6% (-12% to -0.6%)     |
| 24 | Egypt       | Other exposure to mechanical forces             | 17 (10 to 27)   | 18 (11 to 30) | 10.2% (5% to 15.8%)       |
| 25 | Egypt       | Other road injuries                             | 2 (1 to 3)      | 2 (1 to 3)    | 4.2% (-7.8% to 16.6%)     |
| 26 | Egypt       | Other transport injuries                        | 8 (6 to 10)     | 5 (4 to 7)    | -31.8% (-37.8% to -24.9%) |
| 27 | Egypt       | Other unintentional injuries                    | 15 (10 to 24)   | 14 (9 to 23)  | -7.2% (-13.2% to -0.7%)   |
| 28 | Egypt       | Pedestrian road injuries                        | 34 (26 to 43)   | 29 (23 to 37) | -13.3% (-21.3% to -5.2%)  |
| 29 | Egypt       | Physical violence by firearm                    | 0 (0 to 0)      | 0 (0 to 1)    | 113.8% (84.5% to 145.9%)  |
| 30 | Egypt       | Physical violence by other means                | 9 (6 to 13)     | 9 (6 to 13)   | -0.5% (-5.9% to 5.3%)     |
| 31 | Egypt       | Physical violence by sharp object               | 1 (1 to 2)      | 1 (1 to 2)    | -8.6% (-15.8% to -0.8%)   |
| 32 | Egypt       | Poisoning by carbon monoxide                    | 0 (0 to 0)      | 0 (0 to 0)    | 51.7% (34.4% to 71.7%)    |
| 33 | Egypt       | Poisoning by other means                        | 0 (0 to 0)      | 0 (0 to 0)    | -4.9% (-13.8% to 5.1%)    |
| 34 | Egypt       | Pulmonary aspiration and foreign body in airway | 0 (0 to 1)      | 0 (0 to 1)    | -19.7% (-27.6% to -10.6%) |
| 35 | Egypt       | Self-harm by firearm                            | 0 (0 to 0)      | 0 (0 to 0)    | 52.8% (38.5% to 70.3%)    |
| 36 | Egypt       | Self-harm by other specified means              | 1 (0 to 1)      | 1 (1 to 1)    | 11% (4.5% to 18.4%)       |
| 37 | Egypt       | Unintentional firearm injuries                  | 2 (1 to 3)      | 2 (1 to 2)    | -11.7% (-19.5% to -4%)    |
| 38 | Egypt       | Venomous animal contact                         | 2 (1 to 4)      | 2 (1 to 4)    | -17.7% (-26.3% to -11.3%) |
| 39 | El Salvador | Adverse effects of medical treatment            | 0 (0 to 0)      | 0 (0 to 0)    | 0% (0% to 0%)             |
| 40 | El Salvador | Conflict and terrorism                          | 131 (53 to 301) | 0 (0 to 0)    | NA                        |
| 41 | El Salvador | Cyclist road injuries                           | 25 (17 to 35)   | 19 (13 to 26) | -26.4% (-35.3% to -17.1%) |
| 42 | El Salvador | Drowning                                        | 0 (0 to 0)      | 0 (0 to 1)    | 48.6% (33.7% to 66%)      |
| 43 | El Salvador | Environmental heat and cold exposure            | 3 (2 to 4)      | 3 (2 to 4)    | 2.2% (-2.6% to 6.4%)      |
| 44 | El Salvador | Executions and police conflict                  | 0 (0 to 0)      | 0 (0 to 0)    | NA                        |
| 45 |             |                                                 |                 |               |                           |
| 46 |             |                                                 |                 |               |                           |



|    |                   |                                                 |                |                 |                           |
|----|-------------------|-------------------------------------------------|----------------|-----------------|---------------------------|
| 1  |                   |                                                 |                |                 |                           |
| 2  | El Salvador       | Exposure to forces of nature                    | 0 (0 to 0)     | 0 (0 to 0)      | NA                        |
| 3  | El Salvador       | Falls                                           | 91 (71 to 118) | 109 (84 to 141) | 20.2% (15.5% to 25.3%)    |
| 4  | El Salvador       | Fire, heat, and hot substances                  | 4 (2 to 6)     | 3 (2 to 5)      | -15% (-23.5% to -7.7%)    |
| 5  | El Salvador       | Foreign body in eyes                            | 0 (0 to 0)     | 0 (0 to 0)      | -1.4% (-2.7% to -0.6%)    |
| 6  | El Salvador       | Foreign body in other body part                 | 1 (1 to 3)     | 1 (0 to 2)      | -11.3% (-15.9% to -5.6%)  |
| 7  | El Salvador       | Motor vehicle road injuries                     | 46 (35 to 58)  | 39 (30 to 50)   | -15.2% (-22.6% to -7.3%)  |
| 8  | El Salvador       | Motorcyclist road injuries                      | 8 (6 to 10)    | 8 (6 to 11)     | 7.3% (-3.7% to 19.5%)     |
| 9  | El Salvador       | Non-venomous animal contact                     | 6 (3 to 11)    | 5 (3 to 9)      | -20.7% (-24.9% to -16.3%) |
| 10 | El Salvador       | Other exposure to mechanical forces             | 30 (17 to 50)  | 33 (18 to 54)   | 6.7% (-1.1% to 14.5%)     |
| 11 | El Salvador       | Other road injuries                             | 6 (4 to 10)    | 5 (3 to 7)      | -23.5% (-31.6% to -14.7%) |
| 12 | El Salvador       | Other transport injuries                        | 9 (7 to 12)    | 6 (5 to 7)      | -38% (-42% to -33.7%)     |
| 13 | El Salvador       | Other unintentional injuries                    | 13 (8 to 21)   | 8 (5 to 14)     | -35.3% (-43.5% to -27%)   |
| 14 | El Salvador       | Pedestrian road injuries                        | 40 (31 to 49)  | 27 (21 to 34)   | -31.6% (-38.1% to -24.9%) |
| 15 | El Salvador       | Physical violence by firearm                    | 5 (3 to 7)     | 15 (10 to 20)   | 200.7% (156.9% to 257.3%) |
| 16 | El Salvador       | Physical violence by other means                | 41 (29 to 58)  | 60 (41 to 86)   | 47.2% (32.7% to 65.5%)    |
| 17 | El Salvador       | Physical violence by sharp object               | 13 (9 to 19)   | 17 (10 to 26)   | 29.1% (12.9% to 49.4%)    |
| 18 | El Salvador       | Poisoning by carbon monoxide                    | 0 (0 to 0)     | 0 (0 to 0)      | 28.3% (15.1% to 45%)      |
| 19 | El Salvador       | Poisoning by other means                        | 0 (0 to 0)     | 0 (0 to 0)      | 1.8% (-6.6% to 11%)       |
| 20 | El Salvador       | Pulmonary aspiration and foreign body in airway | 1 (0 to 1)     | 0 (0 to 1)      | -59.8% (-67.4% to -51.4%) |
| 21 | El Salvador       | Self-harm by firearm                            | 0 (0 to 0)     | 0 (0 to 0)      | 28% (7.7% to 52.2%)       |
| 22 | El Salvador       | Self-harm by other specified means              | 1 (1 to 1)     | 1 (0 to 1)      | -19.8% (-28.1% to -11.6%) |
| 23 | El Salvador       | Unintentional firearm injuries                  | 2 (1 to 3)     | 2 (1 to 4)      | 17.5% (6% to 30.5%)       |
| 24 | El Salvador       | Venomous animal contact                         | 7 (3 to 14)    | 6 (3 to 12)     | -15.5% (-19.5% to -10.8%) |
| 25 | Equatorial Guinea | Adverse effects of medical treatment            | 0 (0 to 0)     | 0 (0 to 0)      | 0% (0% to 0%)             |
| 26 | Equatorial Guinea | Conflict and terrorism                          | 0 (0 to 0)     | 0 (0 to 0)      | NA                        |
| 27 | Equatorial Guinea | Cyclist road injuries                           | 17 (11 to 24)  | 22 (15 to 31)   | 32% (20.8% to 45.4%)      |
| 28 | Equatorial Guinea | Drowning                                        | 0 (0 to 0)     | 0 (0 to 0)      | -9.6% (-22.3% to 3.9%)    |
| 29 | Equatorial Guinea | Environmental heat and cold exposure            | 2 (2 to 3)     | 2 (2 to 3)      | -5.4% (-13.1% to 3.2%)    |
| 30 | Equatorial Guinea | Executions and police conflict                  | 0 (0 to 0)     | 0 (0 to 0)      | NA                        |
| 31 | Equatorial Guinea | Exposure to forces of nature                    | 0 (0 to 0)     | 0 (0 to 0)      | NA                        |
| 32 | Equatorial Guinea | Falls                                           | 34 (26 to 42)  | 47 (37 to 60)   | 40% (33.8% to 46.2%)      |
| 33 | Equatorial Guinea | Fire, heat, and hot substances                  | 1 (1 to 2)     | 1 (0 to 1)      | -19% (-27.9% to -10.3%)   |
| 34 | Equatorial Guinea | Foreign body in eyes                            | 0 (0 to 0)     | 0 (0 to 0)      | 2.7% (1.1% to 5.4%)       |
| 35 | Equatorial Guinea | Foreign body in other body part                 | 4 (2 to 8)     | 3 (2 to 6)      | -13.9% (-21.4% to -8.2%)  |
| 36 | Equatorial Guinea | Motor vehicle road injuries                     | 39 (30 to 50)  | 46 (35 to 59)   | 18.7% (8.8% to 29.5%)     |
| 37 | Equatorial Guinea | Motorcyclist road injuries                      | 10 (7 to 13)   | 11 (8 to 15)    | 12.9% (-1.2% to 29%)      |
| 38 | Equatorial Guinea | Non-venomous animal contact                     | 10 (6 to 16)   | 4 (3 to 7)      | -54% (-58.7% to -48.8%)   |
| 39 | Equatorial Guinea | Other exposure to mechanical forces             | 16 (9 to 26)   | 15 (9 to 24)    | -7.6% (-17% to 3.4%)      |
| 40 | Equatorial Guinea | Other road injuries                             | 1 (1 to 2)     | 1 (1 to 3)      | 39.1% (23.7% to 58.4%)    |
| 41 | Equatorial Guinea | Other transport injuries                        | 6 (4 to 7)     | 5 (3 to 6)      | -15% (-23.4% to -6.5%)    |
| 42 | Equatorial Guinea | Other unintentional injuries                    | 8 (5 to 12)    | 7 (4 to 11)     | -17.8% (-28.5% to -7.3%)  |
| 43 | Equatorial Guinea | Pedestrian road injuries                        | 39 (30 to 49)  | 34 (26 to 43)   | -13% (-19.5% to -6.3%)    |
| 44 | Equatorial Guinea | Physical violence by firearm                    | 0 (0 to 0)     | 0 (0 to 0)      | 46.2% (23.3% to 70.3%)    |
| 45 |                   |                                                 |                |                 |                           |
| 46 |                   |                                                 |                |                 |                           |

|    |                   |                                                 |                    |               |                           |
|----|-------------------|-------------------------------------------------|--------------------|---------------|---------------------------|
| 1  |                   |                                                 |                    |               |                           |
| 2  | Equatorial Guinea | Physical violence by other means                | 6 (4 to 9)         | 6 (4 to 9)    | -0.8% (-8.1% to 6.9%)     |
| 3  | Equatorial Guinea | Physical violence by sharp object               | 2 (2 to 4)         | 3 (2 to 4)    | 3.8% (-5.9% to 15.2%)     |
| 4  | Equatorial Guinea | Poisoning by carbon monoxide                    | 0 (0 to 0)         | 0 (0 to 0)    | 27.4% (6.6% to 50.9%)     |
| 5  | Equatorial Guinea | Poisoning by other means                        | 0 (0 to 0)         | 0 (0 to 0)    | -26.5% (-37.6% to -14.2%) |
| 6  | Equatorial Guinea | Pulmonary aspiration and foreign body in airway | 1 (0 to 1)         | 0 (0 to 0)    | -52.9% (-60.6% to -44.2%) |
| 7  | Equatorial Guinea | Self-harm by firearm                            | 0 (0 to 0)         | 0 (0 to 1)    | 38.2% (19% to 62.5%)      |
| 8  | Equatorial Guinea | Self-harm by other specified means              | 1 (1 to 2)         | 1 (1 to 2)    | -6.1% (-14% to 1.2%)      |
| 9  | Equatorial Guinea | Unintentional firearm injuries                  | 2 (1 to 3)         | 1 (1 to 2)    | -18.1% (-29.8% to -5.8%)  |
| 10 | Eritrea           | Venomous animal contact                         | 2 (1 to 4)         | 1 (0 to 2)    | -47.8% (-54.6% to -38.9%) |
| 11 | Eritrea           | Adverse effects of medical treatment            | 0 (0 to 0)         | 0 (0 to 0)    | 0% (0% to 0%)             |
| 12 | Eritrea           | Conflict and terrorism                          | 1166 (381 to 2867) | 0 (0 to 0)    | NA                        |
| 13 | Eritrea           | Cyclist road injuries                           | 34 (23 to 51)      | 35 (23 to 52) | 3% (-4.8% to 11.7%)       |
| 14 | Eritrea           | Drowning                                        | 0 (0 to 0)         | 0 (0 to 0)    | -19.2% (-23.9% to -13.3%) |
| 15 | Eritrea           | Environmental heat and cold exposure            | 0 (0 to 1)         | 0 (0 to 1)    | -8.7% (-14.9% to -2.7%)   |
| 16 | Eritrea           | Executions and police conflict                  | 0 (0 to 0)         | 0 (0 to 0)    | NA                        |
| 17 | Eritrea           | Exposure to forces of nature                    | 0 (0 to 0)         | 0 (0 to 0)    | NA                        |
| 18 | Eritrea           | Falls                                           | 21 (13 to 32)      | 26 (16 to 40) | 25.5% (21.7% to 29.9%)    |
| 19 | Eritrea           | Fire, heat, and hot substances                  | 0 (0 to 1)         | 0 (0 to 1)    | -12.9% (-17.8% to -8.5%)  |
| 20 | Eritrea           | Foreign body in eyes                            | 0 (0 to 0)         | 0 (0 to 0)    | 0.6% (0.1% to 1.5%)       |
| 21 | Eritrea           | Foreign body in other body part                 | 3 (1 to 7)         | 3 (1 to 7)    | 2.1% (-2.9% to 8.7%)      |
| 22 | Eritrea           | Motor vehicle road injuries                     | 41 (27 to 59)      | 44 (29 to 62) | 7.3% (-1% to 16.9%)       |
| 23 | Eritrea           | Motorcyclist road injuries                      | 21 (15 to 29)      | 21 (15 to 29) | 2.5% (-5.4% to 10.4%)     |
| 24 | Eritrea           | Non-venomous animal contact                     | 8 (4 to 15)        | 7 (3 to 13)   | -14% (-17.5% to -10%)     |
| 25 | Eritrea           | Other exposure to mechanical forces             | 30 (15 to 55)      | 28 (14 to 51) | -6.3% (-11% to -0.5%)     |
| 26 | Eritrea           | Other road injuries                             | 1 (1 to 3)         | 2 (1 to 3)    | 12.1% (2% to 23.2%)       |
| 27 | Eritrea           | Other transport injuries                        | 3 (2 to 4)         | 3 (2 to 4)    | -7.2% (-12% to -2.2%)     |
| 28 | Eritrea           | Other unintentional injuries                    | 3 (2 to 5)         | 3 (2 to 5)    | -13.4% (-18.6% to -8.2%)  |
| 29 | Eritrea           | Pedestrian road injuries                        | 67 (49 to 88)      | 67 (49 to 88) | -0.1% (-6.8% to 6.6%)     |
| 30 | Eritrea           | Physical violence by firearm                    | 0 (0 to 0)         | 0 (0 to 0)    | 48.8% (35.8% to 64.4%)    |
| 31 | Eritrea           | Physical violence by other means                | 7 (5 to 11)        | 10 (6 to 15)  | 34.8% (25.9% to 43.5%)    |
| 32 | Eritrea           | Physical violence by sharp object               | 2 (1 to 4)         | 3 (1 to 5)    | 37.8% (27.4% to 50.8%)    |
| 33 | Eritrea           | Poisoning by carbon monoxide                    | 0 (0 to 0)         | 0 (0 to 0)    | 14.6% (2.6% to 27.3%)     |
| 34 | Eritrea           | Poisoning by other means                        | 0 (0 to 0)         | 0 (0 to 0)    | -20.4% (-26.8% to -13.3%) |
| 35 | Eritrea           | Pulmonary aspiration and foreign body in airway | 0 (0 to 0)         | 0 (0 to 0)    | -11.3% (-20.6% to -0.1%)  |
| 36 | Eritrea           | Self-harm by firearm                            | 0 (0 to 0)         | 0 (0 to 0)    | 34.6% (25% to 46.2%)      |
| 37 | Eritrea           | Self-harm by other specified means              | 0 (0 to 0)         | 0 (0 to 0)    | 16.2% (9.6% to 22.4%)     |
| 38 | Eritrea           | Unintentional firearm injuries                  | 1 (0 to 2)         | 1 (0 to 2)    | -20.7% (-27.7% to -12.9%) |
| 39 | Eritrea           | Venomous animal contact                         | 1 (0 to 4)         | 1 (0 to 3)    | -15.4% (-21.5% to -9.2%)  |
| 40 | Estonia           | Adverse effects of medical treatment            | 0 (0 to 0)         | 0 (0 to 0)    | 0% (0% to 0%)             |
| 41 | Estonia           | Conflict and terrorism                          | 0 (0 to 0)         | 0 (0 to 0)    | NA                        |
| 42 | Estonia           | Cyclist road injuries                           | 69 (49 to 93)      | 42 (30 to 57) | -39.7% (-48.4% to -30.2%) |
| 43 | Estonia           | Drowning                                        | 1 (1 to 2)         | 1 (0 to 1)    | -18.1% (-29.3% to -7.9%)  |
| 44 | Estonia           | Environmental heat and cold exposure            | 12 (9 to 16)       | 10 (8 to 15)  | -11.1% (-16.3% to -6.1%)  |
| 45 |                   |                                                 |                    |               |                           |
| 46 |                   |                                                 |                    |               |                           |

|    |          |                                                 |                  |                  |                           |
|----|----------|-------------------------------------------------|------------------|------------------|---------------------------|
| 1  |          |                                                 |                  |                  |                           |
| 2  | Estonia  | Executions and police conflict                  | 0 (0 to 0)       | 0 (0 to 0)       | NA                        |
| 3  | Estonia  | Exposure to forces of nature                    | 0 (0 to 0)       | 0 (0 to 0)       | NA                        |
| 4  | Estonia  | Falls                                           | 338 (266 to 430) | 257 (201 to 337) | -23.9% (-28.5% to -19.1%) |
| 5  | Estonia  | Fire, heat, and hot substances                  | 7 (4 to 12)      | 4 (2 to 6)       | -47.2% (-53.5% to -41.1%) |
| 6  | Estonia  | Foreign body in eyes                            | 0 (0 to 0)       | 0 (0 to 0)       | 1.6% (0.8% to 2.7%)       |
| 7  | Estonia  | Foreign body in other body part                 | 2 (1 to 4)       | 2 (1 to 4)       | 1.6% (-4% to 8.7%)        |
| 8  | Estonia  | Motor vehicle road injuries                     | 200 (156 to 249) | 83 (64 to 106)   | -58.5% (-65% to -52%)     |
| 9  | Estonia  | Motorcyclist road injuries                      | 16 (11 to 21)    | 10 (7 to 14)     | -34.5% (-46.4% to -21.6%) |
| 10 | Estonia  | Non-venomous animal contact                     | 4 (2 to 7)       | 4 (2 to 6)       | -7.6% (-12.3% to -2.5%)   |
| 11 | Estonia  | Other exposure to mechanical forces             | 101 (64 to 159)  | 80 (49 to 126)   | -20.8% (-29.2% to -13.2%) |
| 12 | Estonia  | Other road injuries                             | 2 (1 to 4)       | 2 (1 to 3)       | -14.1% (-26.6% to 0.3%)   |
| 13 | Estonia  | Other transport injuries                        | 8 (6 to 10)      | 6 (4 to 8)       | -30.2% (-38.5% to -21.1%) |
| 14 | Estonia  | Other unintentional injuries                    | 30 (19 to 48)    | 26 (16 to 44)    | -11.4% (-23.2% to 0.2%)   |
| 15 | Estonia  | Pedestrian road injuries                        | 86 (66 to 107)   | 30 (22 to 38)    | -65.1% (-70.1% to -59%)   |
| 16 | Estonia  | Physical violence by firearm                    | 1 (1 to 1)       | 0 (0 to 1)       | -57.3% (-70% to -39.2%)   |
| 17 | Estonia  | Physical violence by other means                | 48 (35 to 68)    | 24 (17 to 33)    | -50.6% (-56.9% to -42.5%) |
| 18 | Estonia  | Physical violence by sharp object               | 7 (5 to 11)      | 3 (2 to 5)       | -59.7% (-68.1% to -50.2%) |
| 19 | Estonia  | Poisoning by carbon monoxide                    | 0 (0 to 0)       | 0 (0 to 0)       | 17.6% (-3.5% to 38.6%)    |
| 20 | Estonia  | Poisoning by other means                        | 0 (0 to 1)       | 0 (0 to 1)       | 2.4% (-11% to 14.6%)      |
| 21 | Estonia  | Pulmonary aspiration and foreign body in airway | 2 (1 to 3)       | 1 (0 to 1)       | -45.1% (-52.3% to -36.7%) |
| 22 | Estonia  | Self-harm by firearm                            | 2 (1 to 3)       | 1 (0 to 1)       | -52.8% (-60.4% to -44.7%) |
| 23 | Estonia  | Self-harm by other specified means              | 6 (4 to 9)       | 3 (2 to 5)       | -42.7% (-46.8% to -37.8%) |
| 24 | Estonia  | Unintentional firearm injuries                  | 1 (1 to 2)       | 1 (1 to 2)       | -12.5% (-26.1% to 1.4%)   |
| 25 | Estonia  | Venomous animal contact                         | 3 (1 to 6)       | 3 (1 to 5)       | -9.2% (-14.1% to -4%)     |
| 26 | Eswatini | Adverse effects of medical treatment            | 0 (0 to 0)       | 0 (0 to 0)       | 0% (0% to 0%)             |
| 27 | Eswatini | Conflict and terrorism                          | 0 (0 to 0)       | 0 (0 to 0)       | NA                        |
| 28 | Eswatini | Cyclist road injuries                           | 11 (7 to 16)     | 14 (9 to 21)     | 26.9% (16.7% to 38.5%)    |
| 29 | Eswatini | Drowning                                        | 0 (0 to 0)       | 0 (0 to 0)       | 0.9% (-5.7% to 7.6%)      |
| 30 | Eswatini | Environmental heat and cold exposure            | 0 (0 to 1)       | 0 (0 to 1)       | 2.6% (-3.5% to 8.5%)      |
| 31 | Eswatini | Executions and police conflict                  | 0 (0 to 0)       | 0 (0 to 0)       | NA                        |
| 32 | Eswatini | Exposure to forces of nature                    | 0 (0 to 0)       | 0 (0 to 0)       | NA                        |
| 33 | Eswatini | Falls                                           | 19 (12 to 28)    | 23 (14 to 35)    | 23% (18.1% to 28.8%)      |
| 34 | Eswatini | Fire, heat, and hot substances                  | 0 (0 to 0)       | 0 (0 to 0)       | 3.3% (-4% to 9.8%)        |
| 35 | Eswatini | Foreign body in eyes                            | 0 (0 to 0)       | 0 (0 to 0)       | -0.1% (-0.8% to 0.8%)     |
| 36 | Eswatini | Foreign body in other body part                 | 4 (2 to 8)       | 4 (2 to 8)       | -1.4% (-6.3% to 4.2%)     |
| 37 | Eswatini | Motor vehicle road injuries                     | 31 (21 to 43)    | 39 (26 to 55)    | 27.8% (18.1% to 38.3%)    |
| 38 | Eswatini | Motorcyclist road injuries                      | 9 (6 to 13)      | 14 (10 to 19)    | 50.6% (35.9% to 68%)      |
| 39 | Eswatini | Non-venomous animal contact                     | 4 (2 to 7)       | 3 (2 to 7)       | -2.7% (-7.5% to 3.3%)     |
| 40 | Eswatini | Other exposure to mechanical forces             | 29 (14 to 52)    | 28 (14 to 51)    | -2.9% (-8.2% to 3%)       |
| 41 | Eswatini | Other road injuries                             | 1 (1 to 2)       | 1 (1 to 3)       | 13.6% (3.6% to 23.7%)     |
| 42 | Eswatini | Other transport injuries                        | 3 (2 to 5)       | 3 (2 to 5)       | 4.7% (-2.2% to 10.9%)     |
| 43 | Eswatini | Other unintentional injuries                    | 2 (1 to 4)       | 2 (1 to 4)       | -7% (-12.1% to -1.6%)     |
| 44 | Eswatini | Pedestrian road injuries                        | 37 (28 to 48)    | 43 (31 to 57)    | 16.5% (7.7% to 24.7%)     |
| 45 |          |                                                 |                  |                  |                           |
| 46 |          |                                                 |                  |                  |                           |

|    |          |                                                 |                   |               |                           |
|----|----------|-------------------------------------------------|-------------------|---------------|---------------------------|
| 1  |          |                                                 |                   |               |                           |
| 2  | Eswatini | Physical violence by firearm                    | 0 (0 to 1)        | 0 (0 to 1)    | -15% (-24.3% to -4.6%)    |
| 3  | Eswatini | Physical violence by other means                | 17 (11 to 26)     | 16 (10 to 24) | -10.5% (-19.1% to -1.2%)  |
| 4  | Eswatini | Physical violence by sharp object               | 6 (3 to 10)       | 5 (3 to 9)    | -7.2% (-17.8% to 4.7%)    |
| 5  | Eswatini | Poisoning by carbon monoxide                    | 0 (0 to 0)        | 0 (0 to 0)    | 7.6% (-3% to 19.7%)       |
| 6  | Eswatini | Poisoning by other means                        | 0 (0 to 0)        | 0 (0 to 0)    | -6.4% (-14.5% to 1.8%)    |
| 7  | Eswatini | Pulmonary aspiration and foreign body in airway | 0 (0 to 0)        | 0 (0 to 0)    | 2.4% (-6.8% to 12.2%)     |
| 8  | Eswatini | Self-harm by firearm                            | 0 (0 to 0)        | 0 (0 to 0)    | 61.6% (46.7% to 81.4%)    |
| 9  | Eswatini | Self-harm by other specified means              | 0 (0 to 0)        | 0 (0 to 0)    | 40.7% (30.3% to 51.9%)    |
| 10 | Eswatini | Unintentional firearm injuries                  | 1 (0 to 1)        | 0 (0 to 1)    | -9.8% (-17.8% to 0%)      |
| 11 | Eswatini | Venomous animal contact                         | 0 (0 to 1)        | 0 (0 to 1)    | -11.6% (-18.1% to -4.4%)  |
| 12 | Ethiopia | Adverse effects of medical treatment            | 0 (0 to 0)        | 0 (0 to 0)    | 0% (0% to 0%)             |
| 13 | Ethiopia | Conflict and terrorism                          | 701 (291 to 1568) | 1 (0 to 3)    | NA                        |
| 14 | Ethiopia | Cyclist road injuries                           | 53 (39 to 73)     | 40 (30 to 54) | -24.5% (-27.4% to -21.4%) |
| 15 | Ethiopia | Drowning                                        | 0 (0 to 0)        | 0 (0 to 0)    | -32.4% (-37.8% to -27.4%) |
| 16 | Ethiopia | Environmental heat and cold exposure            | 3 (2 to 4)        | 2 (2 to 3)    | -14% (-19.7% to -8.2%)    |
| 17 | Ethiopia | Executions and police conflict                  | 0 (0 to 0)        | 0 (0 to 1)    | NA                        |
| 18 | Ethiopia | Exposure to forces of nature                    | 0 (0 to 0)        | 0 (0 to 0)    | NA                        |
| 19 | Ethiopia | Falls                                           | 49 (39 to 63)     | 52 (41 to 68) | 6.7% (3.7% to 9.7%)       |
| 20 | Ethiopia | Fire, heat, and hot substances                  | 3 (2 to 4)        | 2 (1 to 3)    | -24.3% (-29% to -19.8%)   |
| 21 | Ethiopia | Foreign body in eyes                            | 0 (0 to 0)        | 0 (0 to 0)    | 0.4% (0.1% to 1%)         |
| 22 | Ethiopia | Foreign body in other body part                 | 3 (2 to 7)        | 3 (2 to 7)    | 0.8% (-3.5% to 5%)        |
| 23 | Ethiopia | Motor vehicle road injuries                     | 40 (29 to 54)     | 29 (21 to 38) | -27.2% (-30.6% to -23.4%) |
| 24 | Ethiopia | Motorcyclist road injuries                      | 18 (13 to 24)     | 13 (10 to 17) | -28.3% (-31.8% to -24.3%) |
| 25 | Ethiopia | Non-venomous animal contact                     | 14 (8 to 25)      | 10 (6 to 17)  | -32.5% (-35.1% to -29.7%) |
| 26 | Ethiopia | Other exposure to mechanical forces             | 22 (13 to 35)     | 20 (12 to 32) | -8.8% (-12.9% to -4.6%)   |
| 27 | Ethiopia | Other road injuries                             | 2 (1 to 3)        | 1 (1 to 3)    | -4.3% (-10.5% to 2.4%)    |
| 28 | Ethiopia | Other transport injuries                        | 7 (6 to 10)       | 6 (4 to 8)    | -20.4% (-26.2% to -14.9%) |
| 29 | Ethiopia | Other unintentional injuries                    | 11 (8 to 18)      | 8 (5 to 13)   | -27.8% (-31.7% to -24.7%) |
| 30 | Ethiopia | Pedestrian road injuries                        | 65 (49 to 82)     | 40 (30 to 52) | -38.1% (-40.7% to -35.3%) |
| 31 | Ethiopia | Physical violence by firearm                    | 0 (0 to 1)        | 0 (0 to 0)    | -26.8% (-30.9% to -21.5%) |
| 32 | Ethiopia | Physical violence by other means                | 13 (9 to 19)      | 10 (7 to 14)  | -28.1% (-30.7% to -25.5%) |
| 33 | Ethiopia | Physical violence by sharp object               | 4 (3 to 6)        | 3 (2 to 5)    | -21.5% (-24.9% to -17.5%) |
| 34 | Ethiopia | Poisoning by carbon monoxide                    | 0 (0 to 0)        | 0 (0 to 0)    | -6.7% (-15.7% to 2.8%)    |
| 35 | Ethiopia | Poisoning by other means                        | 0 (0 to 0)        | 0 (0 to 0)    | -43.7% (-48.1% to -38.9%) |
| 36 | Ethiopia | Pulmonary aspiration and foreign body in airway | 0 (0 to 1)        | 0 (0 to 1)    | -24.5% (-31.4% to -16.9%) |
| 37 | Ethiopia | Self-harm by firearm                            | 0 (0 to 0)        | 0 (0 to 0)    | -23.7% (-30.1% to -16.2%) |
| 38 | Ethiopia | Self-harm by other specified means              | 2 (1 to 3)        | 1 (1 to 1)    | -40.3% (-42.5% to -37.7%) |
| 39 | Ethiopia | Unintentional firearm injuries                  | 3 (2 to 4)        | 2 (1 to 3)    | -30.5% (-36% to -24%)     |
| 40 | Ethiopia | Venomous animal contact                         | 5 (2 to 11)       | 4 (1 to 8)    | -31.7% (-37.3% to -27%)   |
| 41 | Fiji     | Adverse effects of medical treatment            | 0 (0 to 0)        | 0 (0 to 0)    | 0% (0% to 0%)             |
| 42 | Fiji     | Conflict and terrorism                          | 0 (0 to 0)        | 0 (0 to 0)    | NA                        |
| 43 | Fiji     | Cyclist road injuries                           | 11 (7 to 15)      | 11 (7 to 15)  | -0.9% (-7.5% to 6.6%)     |
| 44 | Fiji     | Drowning                                        | 0 (0 to 1)        | 0 (0 to 1)    | 2.5% (-4.9% to 10.5%)     |
| 45 |          |                                                 |                   |               |                           |
| 46 |          |                                                 |                   |               |                           |

|    |         |                                                 |                  |                  |                           |
|----|---------|-------------------------------------------------|------------------|------------------|---------------------------|
| 1  |         |                                                 |                  |                  |                           |
| 2  | Fiji    | Environmental heat and cold exposure            | 2 (1 to 3)       | 2 (1 to 3)       | -0.3% (-5.2% to 5%)       |
| 3  | Fiji    | Executions and police conflict                  | 0 (0 to 0)       | 0 (0 to 0)       | NA                        |
| 4  | Fiji    | Exposure to forces of nature                    | 0 (0 to 0)       | 0 (0 to 0)       | NA                        |
| 5  | Fiji    | Falls                                           | 46 (35 to 61)    | 61 (48 to 82)    | 34.1% (29.6% to 39.1%)    |
| 6  | Fiji    | Fire, heat, and hot substances                  | 2 (1 to 3)       | 2 (1 to 3)       | -3.4% (-8.7% to 1.9%)     |
| 7  | Fiji    | Foreign body in eyes                            | 0 (0 to 0)       | 0 (0 to 0)       | -0.3% (-1.1% to 0.1%)     |
| 8  | Fiji    | Foreign body in other body part                 | 1 (0 to 1)       | 1 (0 to 1)       | -3.6% (-8% to 1%)         |
| 9  | Fiji    | Motor vehicle road injuries                     | 28 (21 to 35)    | 22 (17 to 28)    | -20.4% (-26.1% to -14.4%) |
| 10 | Fiji    | Motorcyclist road injuries                      | 13 (9 to 17)     | 14 (11 to 19)    | 12.6% (3.8% to 22.2%)     |
| 11 | Fiji    | Non-venomous animal contact                     | 4 (2 to 8)       | 4 (2 to 7)       | -18% (-22.4% to -13.8%)   |
| 12 | Fiji    | Other exposure to mechanical forces             | 12 (7 to 21)     | 11 (6 to 18)     | -14.1% (-18.9% to -9.5%)  |
| 13 | Fiji    | Other road injuries                             | 1 (1 to 2)       | 1 (1 to 2)       | -2.1% (-11% to 8.5%)      |
| 14 | Fiji    | Other transport injuries                        | 6 (5 to 8)       | 6 (4 to 8)       | -4% (-9% to 1.2%)         |
| 15 | Fiji    | Other unintentional injuries                    | 8 (6 to 13)      | 7 (4 to 11)      | -19.3% (-23.4% to -14.8%) |
| 16 | Fiji    | Pedestrian road injuries                        | 9 (6 to 11)      | 8 (6 to 10)      | -12.2% (-19.1% to -4.1%)  |
| 17 | Fiji    | Physical violence by firearm                    | 0 (0 to 0)       | 0 (0 to 0)       | 25.8% (12.8% to 40.3%)    |
| 18 | Fiji    | Physical violence by other means                | 25 (18 to 35)    | 27 (19 to 38)    | 7.8% (0.2% to 15.9%)      |
| 19 | Fiji    | Physical violence by sharp object               | 1 (1 to 2)       | 1 (1 to 2)       | 3.1% (-6.5% to 14.6%)     |
| 20 | Fiji    | Poisoning by carbon monoxide                    | 0 (0 to 0)       | 0 (0 to 0)       | 13.7% (3% to 24.5%)       |
| 21 | Fiji    | Poisoning by other means                        | 0 (0 to 0)       | 0 (0 to 0)       | -7.3% (-14.5% to -0.5%)   |
| 22 | Fiji    | Pulmonary aspiration and foreign body in airway | 0 (0 to 0)       | 0 (0 to 0)       | -4.9% (-14.1% to 6.2%)    |
| 23 | Fiji    | Self-harm by firearm                            | 0 (0 to 1)       | 0 (0 to 1)       | 12.3% (-3% to 29.3%)      |
| 24 | Fiji    | Self-harm by other specified means              | 2 (1 to 3)       | 2 (1 to 3)       | -9.3% (-15.6% to -2.4%)   |
| 25 | Fiji    | Unintentional firearm injuries                  | 2 (1 to 3)       | 2 (1 to 3)       | -5.6% (-12.4% to 1.3%)    |
| 26 | Fiji    | Venomous animal contact                         | 3 (1 to 6)       | 3 (1 to 5)       | -10.3% (-16% to -3.6%)    |
| 27 | Finland | Adverse effects of medical treatment            | 0 (0 to 0)       | 0 (0 to 0)       | 0% (0% to 0%)             |
| 28 | Finland | Conflict and terrorism                          | 1 (0 to 1)       | 0 (0 to 0)       | NA                        |
| 29 | Finland | Cyclist road injuries                           | 38 (28 to 50)    | 21 (15 to 29)    | -44% (-51.6% to -36%)     |
| 30 | Finland | Drowning                                        | 0 (0 to 0)       | 0 (0 to 0)       | 69.6% (52.5% to 88.8%)    |
| 31 | Finland | Environmental heat and cold exposure            | 3 (2 to 4)       | 3 (2 to 4)       | 4.3% (-0.8% to 10.5%)     |
| 32 | Finland | Executions and police conflict                  | 0 (0 to 0)       | 0 (0 to 0)       | NA                        |
| 33 | Finland | Exposure to forces of nature                    | 0 (0 to 0)       | 0 (0 to 0)       | NA                        |
| 34 | Finland | Falls                                           | 409 (320 to 521) | 418 (324 to 539) | 2.2% (-2.4% to 7%)        |
| 35 | Finland | Fire, heat, and hot substances                  | 4 (2 to 7)       | 3 (2 to 5)       | -28.2% (-34.5% to -22.1%) |
| 36 | Finland | Foreign body in eyes                            | 0 (0 to 0)       | 0 (0 to 0)       | 1% (0.3% to 2%)           |
| 37 | Finland | Foreign body in other body part                 | 2 (1 to 4)       | 2 (1 to 4)       | 0.3% (-4.2% to 5.3%)      |
| 38 | Finland | Motor vehicle road injuries                     | 44 (33 to 56)    | 23 (17 to 30)    | -47.9% (-54.8% to -40.7%) |
| 39 | Finland | Motorcyclist road injuries                      | 12 (9 to 15)     | 10 (7 to 13)     | -16.3% (-29% to -2.4%)    |
| 40 | Finland | Non-venomous animal contact                     | 3 (2 to 6)       | 3 (1 to 5)       | -17.7% (-21.5% to -13.5%) |
| 41 | Finland | Other exposure to mechanical forces             | 53 (32 to 85)    | 50 (30 to 80)    | -6.2% (-12% to 0%)        |
| 42 | Finland | Other road injuries                             | 1 (1 to 2)       | 1 (0 to 2)       | -17.1% (-27.4% to -5.7%)  |
| 43 | Finland | Other transport injuries                        | 8 (7 to 11)      | 6 (4 to 7)       | -33.6% (-39.5% to -25.8%) |
| 44 | Finland | Other unintentional injuries                    | 32 (21 to 51)    | 25 (16 to 40)    | -22.5% (-28.9% to -16.8%) |
| 45 |         |                                                 |                  |                  |                           |
| 46 |         |                                                 |                  |                  |                           |

|    |         |                                                 |                  |                  |                           |
|----|---------|-------------------------------------------------|------------------|------------------|---------------------------|
| 1  |         |                                                 |                  |                  |                           |
| 2  | Finland | Pedestrian road injuries                        | 11 (8 to 14)     | 7 (5 to 10)      | -33.3% (-43.3% to -22.7%) |
| 3  | Finland | Physical violence by firearm                    | 1 (0 to 1)       | 1 (0 to 1)       | 16.6% (0.4% to 34.5%)     |
| 4  | Finland | Physical violence by other means                | 27 (19 to 38)    | 18 (13 to 26)    | -30.9% (-37.8% to -23.3%) |
| 5  | Finland | Physical violence by sharp object               | 3 (2 to 5)       | 2 (1 to 3)       | -40.6% (-49.2% to -31.5%) |
| 6  | Finland | Poisoning by carbon monoxide                    | 0 (0 to 0)       | 0 (0 to 0)       | -75.6% (-82.8% to -66.4%) |
| 7  | Finland | Poisoning by other means                        | 0 (0 to 1)       | 0 (0 to 0)       | -44.5% (-53.9% to -34.6%) |
| 8  | Finland | Pulmonary aspiration and foreign body in airway | 1 (1 to 2)       | 1 (1 to 2)       | -21% (-28.4% to -13.7%)   |
| 9  | Finland | Self-harm by firearm                            | 2 (1 to 3)       | 1 (0 to 1)       | -67% (-72.4% to -61.2%)   |
| 10 | Finland | Self-harm by other specified means              | 6 (4 to 9)       | 4 (3 to 6)       | -35.7% (-40.4% to -30.5%) |
| 11 | Finland | Unintentional firearm injuries                  | 1 (1 to 2)       | 1 (1 to 2)       | 0% (-10.8% to 11.7%)      |
| 12 | Finland | Venomous animal contact                         | 1 (0 to 2)       | 1 (0 to 2)       | -14.4% (-19.2% to -8.2%)  |
| 13 | France  | Adverse effects of medical treatment            | 0 (0 to 0)       | 0 (0 to 0)       | 0% (0% to 0%)             |
| 14 | France  | Conflict and terrorism                          | 0 (0 to 0)       | 0 (0 to 0)       | NA                        |
| 15 | France  | Cyclist road injuries                           | 25 (18 to 34)    | 20 (14 to 27)    | -19.9% (-31.2% to -7.6%)  |
| 16 | France  | Drowning                                        | 0 (0 to 0)       | 0 (0 to 0)       | 93% (74.9% to 109%)       |
| 17 | France  | Environmental heat and cold exposure            | 2 (2 to 3)       | 2 (1 to 3)       | -11.7% (-16.6% to -6.3%)  |
| 18 | France  | Executions and police conflict                  | 0 (0 to 0)       | 0 (0 to 0)       | NA                        |
| 19 | France  | Exposure to forces of nature                    | 0 (0 to 0)       | 0 (0 to 0)       | NA                        |
| 20 | France  | Falls                                           | 319 (254 to 402) | 329 (259 to 419) | 3.1% (-1.4% to 8.1%)      |
| 21 | France  | Fire, heat, and hot substances                  | 3 (2 to 4)       | 2 (1 to 4)       | -9.7% (-15.3% to -4.5%)   |
| 22 | France  | Foreign body in eyes                            | 0 (0 to 0)       | 0 (0 to 0)       | 0.2% (0% to 0.6%)         |
| 23 | France  | Foreign body in other body part                 | 2 (1 to 3)       | 2 (1 to 3)       | 5.5% (0.8% to 10.6%)      |
| 24 | France  | Motor vehicle road injuries                     | 49 (38 to 63)    | 22 (16 to 28)    | -55.8% (-63% to -47.4%)   |
| 25 | France  | Motorcyclist road injuries                      | 12 (9 to 16)     | 11 (8 to 14)     | -8.7% (-23.7% to 9.3%)    |
| 26 | France  | Non-venomous animal contact                     | 2 (1 to 4)       | 2 (1 to 4)       | -6.2% (-10.2% to -1.9%)   |
| 27 | France  | Other exposure to mechanical forces             | 51 (31 to 80)    | 48 (28 to 76)    | -6.7% (-12.7% to -0.3%)   |
| 28 | France  | Other road injuries                             | 1 (1 to 2)       | 1 (1 to 2)       | -10.8% (-25.1% to 4%)     |
| 29 | France  | Other transport injuries                        | 5 (4 to 6)       | 5 (4 to 7)       | 10.4% (5.4% to 16.3%)     |
| 30 | France  | Other unintentional injuries                    | 33 (22 to 51)    | 26 (17 to 41)    | -21.8% (-27.1% to -16.6%) |
| 31 | France  | Pedestrian road injuries                        | 19 (14 to 25)    | 7 (5 to 10)      | -62.3% (-68.4% to -54.9%) |
| 32 | France  | Physical violence by firearm                    | 0 (0 to 1)       | 1 (0 to 1)       | 29% (15.1% to 45.2%)      |
| 33 | France  | Physical violence by other means                | 16 (12 to 23)    | 13 (9 to 19)     | -20.8% (-27.8% to -14.6%) |
| 34 | France  | Physical violence by sharp object               | 1 (1 to 2)       | 1 (1 to 2)       | -13.2% (-23.3% to -3.8%)  |
| 35 | France  | Poisoning by carbon monoxide                    | 0 (0 to 0)       | 0 (0 to 0)       | 11.9% (3.8% to 21.2%)     |
| 36 | France  | Poisoning by other means                        | 0 (0 to 0)       | 0 (0 to 0)       | -0.3% (-6.7% to 5%)       |
| 37 | France  | Pulmonary aspiration and foreign body in airway | 1 (1 to 2)       | 1 (1 to 2)       | -15.8% (-24.1% to -5.9%)  |
| 38 | France  | Self-harm by firearm                            | 1 (1 to 2)       | 1 (0 to 1)       | -47% (-54.4% to -38.3%)   |
| 39 | France  | Self-harm by other specified means              | 4 (3 to 7)       | 3 (2 to 5)       | -24.6% (-29.5% to -19.2%) |
| 40 | France  | Unintentional firearm injuries                  | 1 (1 to 2)       | 1 (1 to 2)       | -10.8% (-19.7% to -1.1%)  |
| 41 | France  | Venomous animal contact                         | 1 (0 to 2)       | 1 (0 to 2)       | -9.7% (-15.1% to -4.9%)   |
| 42 | Gabon   | Adverse effects of medical treatment            | 0 (0 to 0)       | 0 (0 to 0)       | 0% (0% to 0%)             |
| 43 | Gabon   | Conflict and terrorism                          | 0 (0 to 0)       | 1 (0 to 2)       | NA                        |
| 44 | Gabon   | Cyclist road injuries                           | 22 (15 to 31)    | 22 (15 to 31)    | -0.9% (-7.7% to 7.2%)     |
| 45 |         |                                                 |                  |                  |                           |
| 46 |         |                                                 |                  |                  |                           |

|    |        |                                                 |               |               |                           |
|----|--------|-------------------------------------------------|---------------|---------------|---------------------------|
| 1  |        |                                                 |               |               |                           |
| 2  | Gabon  | Drowning                                        | 0 (0 to 0)    | 0 (0 to 0)    | -16.1% (-23.7% to -8.3%)  |
| 3  | Gabon  | Environmental heat and cold exposure            | 3 (2 to 4)    | 2 (2 to 4)    | -6.9% (-11.9% to -0.7%)   |
| 4  | Gabon  | Executions and police conflict                  | 0 (0 to 0)    | 0 (0 to 0)    | NA                        |
| 5  | Gabon  | Exposure to forces of nature                    | 0 (0 to 0)    | 0 (0 to 0)    | NA                        |
| 6  | Gabon  | Falls                                           | 47 (37 to 59) | 53 (43 to 67) | 13.1% (8.9% to 16.7%)     |
| 7  | Gabon  | Fire, heat, and hot substances                  | 1 (1 to 2)    | 1 (1 to 2)    | -12.1% (-17% to -7.1%)    |
| 8  | Gabon  | Foreign body in eyes                            | 0 (0 to 0)    | 0 (0 to 0)    | -0.4% (-1.4% to 0.2%)     |
| 9  | Gabon  | Foreign body in other body part                 | 3 (2 to 6)    | 3 (2 to 6)    | -2.6% (-7.6% to 2.7%)     |
| 10 | Gabon  | Motor vehicle road injuries                     | 50 (38 to 64) | 48 (37 to 63) | -2.7% (-8.5% to 4.2%)     |
| 11 | Gabon  | Motorcyclist road injuries                      | 15 (12 to 20) | 14 (11 to 19) | -5.6% (-13.5% to 3.7%)    |
| 12 | Gabon  | Non-venomous animal contact                     | 5 (3 to 9)    | 5 (3 to 9)    | -3.7% (-8.5% to 1.2%)     |
| 13 | Gabon  | Other exposure to mechanical forces             | 17 (10 to 29) | 15 (9 to 25)  | -11.6% (-17% to -5.4%)    |
| 14 | Gabon  | Other road injuries                             | 1 (1 to 2)    | 1 (1 to 3)    | 2.8% (-5.4% to 12.4%)     |
| 15 | Gabon  | Other transport injuries                        | 6 (4 to 8)    | 5 (4 to 7)    | -11.5% (-16.3% to -6.2%)  |
| 16 | Gabon  | Other unintentional injuries                    | 8 (5 to 12)   | 7 (4 to 12)   | -9.6% (-17.1% to -2.7%)   |
| 17 | Gabon  | Pedestrian road injuries                        | 48 (37 to 60) | 40 (31 to 51) | -16.2% (-21.2% to -10.8%) |
| 18 | Gabon  | Physical violence by firearm                    | 0 (0 to 0)    | 0 (0 to 0)    | 16.3% (4% to 30.7%)       |
| 19 | Gabon  | Physical violence by other means                | 7 (5 to 11)   | 6 (4 to 9)    | -13.4% (-18.8% to -8.3%)  |
| 20 | Gabon  | Physical violence by sharp object               | 3 (2 to 4)    | 3 (2 to 4)    | -12.2% (-18.4% to -6%)    |
| 21 | Gabon  | Poisoning by carbon monoxide                    | 0 (0 to 0)    | 0 (0 to 0)    | 12.6% (2.3% to 25.7%)     |
| 22 | Gabon  | Poisoning by other means                        | 0 (0 to 0)    | 0 (0 to 0)    | -16.4% (-22.7% to -9%)    |
| 23 | Gabon  | Pulmonary aspiration and foreign body in airway | 0 (0 to 1)    | 0 (0 to 1)    | -13.6% (-21.9% to -3.1%)  |
| 24 | Gabon  | Self-harm by firearm                            | 0 (0 to 1)    | 0 (0 to 1)    | 2.7% (-8.9% to 16.5%)     |
| 25 | Gabon  | Self-harm by other specified means              | 2 (1 to 2)    | 1 (1 to 2)    | -13.3% (-18.3% to -7.9%)  |
| 26 | Gabon  | Unintentional firearm injuries                  | 2 (1 to 2)    | 1 (1 to 2)    | -11.8% (-18.5% to -4.3%)  |
| 27 | Gabon  | Venomous animal contact                         | 1 (0 to 3)    | 1 (0 to 3)    | -0.8% (-7.3% to 6.3%)     |
| 28 | Gambia | Adverse effects of medical treatment            | 0 (0 to 0)    | 0 (0 to 0)    | 0% (0% to 0%)             |
| 29 | Gambia | Conflict and terrorism                          | 0 (0 to 0)    | 0 (0 to 0)    | NA                        |
| 30 | Gambia | Cyclist road injuries                           | 21 (13 to 32) | 24 (15 to 35) | 11% (3.8% to 19.1%)       |
| 31 | Gambia | Drowning                                        | 0 (0 to 0)    | 0 (0 to 0)    | -5.7% (-12.5% to 1.3%)    |
| 32 | Gambia | Environmental heat and cold exposure            | 0 (0 to 1)    | 0 (0 to 1)    | -2.7% (-8.2% to 2.9%)     |
| 33 | Gambia | Executions and police conflict                  | 0 (0 to 0)    | 0 (0 to 0)    | NA                        |
| 34 | Gambia | Exposure to forces of nature                    | 0 (0 to 0)    | 0 (0 to 0)    | NA                        |
| 35 | Gambia | Falls                                           | 18 (12 to 26) | 21 (14 to 31) | 19% (15% to 23.3%)        |
| 36 | Gambia | Fire, heat, and hot substances                  | 0 (0 to 0)    | 0 (0 to 0)    | -2.2% (-7.2% to 2.5%)     |
| 37 | Gambia | Foreign body in eyes                            | 0 (0 to 0)    | 0 (0 to 0)    | -1% (-2.3% to -0.2%)      |
| 38 | Gambia | Foreign body in other body part                 | 4 (1 to 8)    | 4 (2 to 8)    | 2.7% (-2.6% to 8.8%)      |
| 39 | Gambia | Motor vehicle road injuries                     | 41 (28 to 57) | 45 (31 to 63) | 9.4% (1.7% to 17.2%)      |
| 40 | Gambia | Motorcyclist road injuries                      | 20 (14 to 28) | 23 (16 to 32) | 14% (6.7% to 22.4%)       |
| 41 | Gambia | Non-venomous animal contact                     | 3 (1 to 6)    | 3 (1 to 6)    | -0.6% (-5.7% to 4.5%)     |
| 42 | Gambia | Other exposure to mechanical forces             | 26 (13 to 47) | 24 (12 to 44) | -9% (-14.5% to -3.8%)     |
| 43 | Gambia | Other road injuries                             | 2 (1 to 3)    | 2 (1 to 3)    | 2.9% (-4.9% to 10.9%)     |
| 44 | Gambia | Other transport injuries                        | 3 (2 to 4)    | 3 (2 to 4)    | -0.8% (-6.7% to 6.1%)     |
| 45 |        |                                                 |               |               |                           |
| 46 |        |                                                 |               |               |                           |

|    |         |                                                 |                  |                  |                           |
|----|---------|-------------------------------------------------|------------------|------------------|---------------------------|
| 1  |         |                                                 |                  |                  |                           |
| 2  | Gambia  | Other unintentional injuries                    | 3 (2 to 5)       | 3 (2 to 5)       | -3.9% (-9.7% to 1.9%)     |
| 3  | Gambia  | Pedestrian road injuries                        | 49 (36 to 63)    | 51 (37 to 67)    | 4.8% (-1.4% to 11.3%)     |
| 4  | Gambia  | Physical violence by firearm                    | 0 (0 to 0)       | 0 (0 to 0)       | 45% (23.7% to 65.5%)      |
| 5  | Gambia  | Physical violence by other means                | 4 (3 to 6)       | 4 (3 to 6)       | 2.3% (-1.7% to 6.6%)      |
| 6  | Gambia  | Physical violence by sharp object               | 1 (1 to 2)       | 1 (1 to 2)       | 0.7% (-5.4% to 6.6%)      |
| 7  | Gambia  | Poisoning by carbon monoxide                    | 0 (0 to 0)       | 0 (0 to 0)       | 6.6% (-4% to 18.5%)       |
| 8  | Gambia  | Poisoning by other means                        | 0 (0 to 0)       | 0 (0 to 0)       | -11.3% (-17.5% to -4.5%)  |
| 9  | Gambia  | Pulmonary aspiration and foreign body in airway | 0 (0 to 0)       | 0 (0 to 0)       | 6% (-2.3% to 16.1%)       |
| 10 | Gambia  | Self-harm by firearm                            | 0 (0 to 0)       | 0 (0 to 0)       | 19.6% (12% to 27.4%)      |
| 11 | Gambia  | Self-harm by other specified means              | 0 (0 to 0)       | 0 (0 to 0)       | 16.4% (10.3% to 22.6%)    |
| 12 | Gambia  | Unintentional firearm injuries                  | 1 (0 to 2)       | 1 (0 to 2)       | -9.2% (-16.3% to -0.5%)   |
| 13 | Gambia  | Venomous animal contact                         | 0 (0 to 1)       | 0 (0 to 1)       | -0.2% (-7% to 7.2%)       |
| 14 | Georgia | Adverse effects of medical treatment            | 0 (0 to 0)       | 0 (0 to 0)       | 0% (0% to 0%)             |
| 15 | Georgia | Conflict and terrorism                          | 0 (0 to 0)       | 0 (0 to 0)       | NA                        |
| 16 | Georgia | Cyclist road injuries                           | 21 (14 to 29)    | 17 (12 to 24)    | -17.6% (-26.4% to -7.6%)  |
| 17 | Georgia | Drowning                                        | 1 (0 to 1)       | 1 (0 to 1)       | -24.3% (-33.5% to -15.2%) |
| 18 | Georgia | Environmental heat and cold exposure            | 5 (3 to 7)       | 4 (3 to 6)       | -9.1% (-17.3% to 0.6%)    |
| 19 | Georgia | Executions and police conflict                  | 0 (0 to 0)       | 0 (0 to 0)       | NA                        |
| 20 | Georgia | Exposure to forces of nature                    | 0 (0 to 0)       | 0 (0 to 0)       | NA                        |
| 21 | Georgia | Falls                                           | 189 (144 to 245) | 226 (176 to 295) | 20% (13.6% to 27.1%)      |
| 22 | Georgia | Fire, heat, and hot substances                  | 6 (4 to 10)      | 5 (3 to 8)       | -26.5% (-33.2% to -19.2%) |
| 23 | Georgia | Foreign body in eyes                            | 0 (0 to 0)       | 0 (0 to 0)       | -3.9% (-11.6% to 4.2%)    |
| 24 | Georgia | Foreign body in other body part                 | 3 (1 to 5)       | 2 (1 to 3)       | -38.7% (-44.4% to -32.2%) |
| 25 | Georgia | Motor vehicle road injuries                     | 82 (64 to 103)   | 72 (58 to 89)    | -12.1% (-20.3% to -1.6%)  |
| 26 | Georgia | Motorcyclist road injuries                      | 6 (4 to 8)       | 4 (3 to 6)       | -26.1% (-36% to -13.7%)   |
| 27 | Georgia | Non-venomous animal contact                     | 2 (1 to 4)       | 2 (1 to 4)       | -15.4% (-27.4% to 0.1%)   |
| 28 | Georgia | Other exposure to mechanical forces             | 72 (45 to 111)   | 79 (51 to 124)   | 10.4% (1.6% to 20.6%)     |
| 29 | Georgia | Other road injuries                             | 2 (1 to 3)       | 2 (1 to 4)       | 5.8% (-6.3% to 19.5%)     |
| 30 | Georgia | Other transport injuries                        | 5 (4 to 7)       | 6 (5 to 8)       | 8.4% (-4.9% to 24.7%)     |
| 31 | Georgia | Other unintentional injuries                    | 25 (16 to 40)    | 29 (19 to 45)    | 13.7% (5.4% to 23.3%)     |
| 32 | Georgia | Pedestrian road injuries                        | 27 (20 to 35)    | 30 (23 to 37)    | 9.5% (-2.7% to 24%)       |
| 33 | Georgia | Physical violence by firearm                    | 1 (0 to 1)       | 0 (0 to 1)       | -44.2% (-55% to -32.4%)   |
| 34 | Georgia | Physical violence by other means                | 17 (12 to 24)    | 13 (9 to 19)     | -21.5% (-30% to -12%)     |
| 35 | Georgia | Physical violence by sharp object               | 2 (1 to 4)       | 2 (1 to 4)       | -5.5% (-18.3% to 9.8%)    |
| 36 | Georgia | Poisoning by carbon monoxide                    | 0 (0 to 0)       | 0 (0 to 0)       | 0.6% (-14.5% to 20.7%)    |
| 37 | Georgia | Poisoning by other means                        | 0 (0 to 1)       | 0 (0 to 1)       | 18.5% (4.4% to 36.1%)     |
| 38 | Georgia | Pulmonary aspiration and foreign body in airway | 1 (1 to 2)       | 1 (1 to 2)       | 21% (7% to 36.2%)         |
| 39 | Georgia | Self-harm by firearm                            | 0 (0 to 0)       | 0 (0 to 1)       | 62.4% (40.4% to 93.1%)    |
| 40 | Georgia | Self-harm by other specified means              | 1 (1 to 2)       | 2 (1 to 2)       | 26.8% (19.1% to 35%)      |
| 41 | Georgia | Unintentional firearm injuries                  | 2 (1 to 2)       | 1 (1 to 2)       | -4.5% (-17% to 10.7%)     |
| 42 | Georgia | Venomous animal contact                         | 2 (1 to 4)       | 2 (1 to 3)       | -19.6% (-31.4% to -4.1%)  |
| 43 | Germany | Adverse effects of medical treatment            | 0 (0 to 0)       | 0 (0 to 0)       | 0% (0% to 0%)             |
| 44 | Germany | Conflict and terrorism                          | 0 (0 to 1)       | 0 (0 to 0)       | NA                        |
| 45 |         |                                                 |                  |                  |                           |
| 46 |         |                                                 |                  |                  |                           |



|    |         |                                                 |                  |                  |                           |
|----|---------|-------------------------------------------------|------------------|------------------|---------------------------|
| 1  |         |                                                 |                  |                  |                           |
| 2  | Germany | Cyclist road injuries                           | 28 (21 to 37)    | 18 (13 to 25)    | -34.9% (-44.8% to -24.6%) |
| 3  | Germany | Drowning                                        | 0 (0 to 0)       | 0 (0 to 0)       | 57.6% (40.5% to 76.1%)    |
| 4  | Germany | Environmental heat and cold exposure            | 2 (1 to 3)       | 2 (1 to 3)       | -1.4% (-6.3% to 3.3%)     |
| 5  | Germany | Executions and police conflict                  | 0 (0 to 0)       | 0 (0 to 0)       | NA                        |
| 6  | Germany | Exposure to forces of nature                    | 0 (0 to 0)       | 0 (0 to 0)       | NA                        |
| 7  | Germany | Falls                                           | 247 (195 to 315) | 272 (213 to 350) | 10.1% (5.2% to 15%)       |
| 8  | Germany | Fire, heat, and hot substances                  | 2 (1 to 4)       | 2 (1 to 4)       | -11.4% (-17.5% to -5.9%)  |
| 9  | Germany | Foreign body in eyes                            | 0 (0 to 0)       | 0 (0 to 0)       | 1.1% (0.3% to 2.3%)       |
| 10 | Germany | Foreign body in other body part                 | 2 (1 to 3)       | 2 (1 to 3)       | 0.8% (-3.4% to 5.6%)      |
| 11 | Germany | Motor vehicle road injuries                     | 42 (33 to 53)    | 19 (14 to 25)    | -54.6% (-62.2% to -46.3%) |
| 12 | Germany | Motorcyclist road injuries                      | 12 (9 to 16)     | 9 (7 to 12)      | -27.5% (-41% to -11.6%)   |
| 13 | Germany | Non-venomous animal contact                     | 2 (1 to 4)       | 2 (1 to 4)       | -10.6% (-14.9% to -5.7%)  |
| 14 | Germany | Other exposure to mechanical forces             | 44 (26 to 70)    | 43 (26 to 69)    | -1% (-7.2% to 4.1%)       |
| 15 | Germany | Other road injuries                             | 1 (1 to 2)       | 1 (1 to 2)       | -19.3% (-31.3% to -5.5%)  |
| 16 | Germany | Other transport injuries                        | 5 (4 to 7)       | 5 (3 to 6)       | -5.3% (-10.4% to 0%)      |
| 17 | Germany | Other unintentional injuries                    | 25 (16 to 40)    | 23 (14 to 37)    | -9% (-14.2% to -4.1%)     |
| 18 | Germany | Pedestrian road injuries                        | 10 (8 to 13)     | 6 (4 to 8)       | -42.8% (-52.2% to -32.2%) |
| 19 | Germany | Physical violence by firearm                    | 0 (0 to 1)       | 1 (0 to 1)       | 39.6% (25.5% to 56.8%)    |
| 20 | Germany | Physical violence by other means                | 15 (10 to 21)    | 13 (9 to 19)     | -12.3% (-18.6% to -6.5%)  |
| 21 | Germany | Physical violence by sharp object               | 2 (1 to 3)       | 1 (1 to 2)       | -17.8% (-26.8% to -8.8%)  |
| 22 | Germany | Poisoning by carbon monoxide                    | 0 (0 to 0)       | 0 (0 to 0)       | 9% (1.4% to 17.2%)        |
| 23 | Germany | Poisoning by other means                        | 0 (0 to 0)       | 0 (0 to 0)       | -1.9% (-7.2% to 4%)       |
| 24 | Germany | Pulmonary aspiration and foreign body in airway | 1 (1 to 2)       | 1 (1 to 2)       | -10.5% (-18.9% to -2.6%)  |
| 25 | Germany | Self-harm by firearm                            | 0 (0 to 1)       | 0 (0 to 1)       | -7% (-19.6% to 8.2%)      |
| 26 | Germany | Self-harm by other specified means              | 3 (2 to 5)       | 3 (2 to 4)       | -23.7% (-28.3% to -19.2%) |
| 27 | Germany | Unintentional firearm injuries                  | 1 (1 to 2)       | 1 (1 to 2)       | 2.6% (-5% to 10.7%)       |
| 28 | Germany | Venomous animal contact                         | 1 (0 to 2)       | 1 (0 to 2)       | -12.8% (-18.2% to -7%)    |
| 29 | Ghana   | Adverse effects of medical treatment            | 0 (0 to 0)       | 0 (0 to 0)       | 0% (0% to 0%)             |
| 30 | Ghana   | Conflict and terrorism                          | 0 (0 to 0)       | 0 (0 to 1)       | NA                        |
| 31 | Ghana   | Cyclist road injuries                           | 31 (19 to 46)    | 39 (25 to 58)    | 28% (19.2% to 38.9%)      |
| 32 | Ghana   | Drowning                                        | 0 (0 to 0)       | 0 (0 to 0)       | 4.5% (-2.5% to 12.1%)     |
| 33 | Ghana   | Environmental heat and cold exposure            | 0 (0 to 1)       | 0 (0 to 1)       | 2.8% (-2% to 8.6%)        |
| 34 | Ghana   | Executions and police conflict                  | 0 (0 to 0)       | 0 (0 to 0)       | NA                        |
| 35 | Ghana   | Exposure to forces of nature                    | 0 (0 to 0)       | 0 (0 to 0)       | NA                        |
| 36 | Ghana   | Falls                                           | 19 (12 to 28)    | 23 (15 to 35)    | 23.4% (19.4% to 27.5%)    |
| 37 | Ghana   | Fire, heat, and hot substances                  | 0 (0 to 0)       | 0 (0 to 0)       | -2.7% (-7% to 2.4%)       |
| 38 | Ghana   | Foreign body in eyes                            | 0 (0 to 0)       | 0 (0 to 0)       | -1.1% (-2.4% to -0.1%)    |
| 39 | Ghana   | Foreign body in other body part                 | 3 (1 to 7)       | 4 (1 to 8)       | 2.2% (-3.2% to 7.5%)      |
| 40 | Ghana   | Motor vehicle road injuries                     | 52 (36 to 73)    | 64 (43 to 91)    | 22.1% (13.6% to 32.1%)    |
| 41 | Ghana   | Motorcyclist road injuries                      | 17 (12 to 24)    | 25 (17 to 35)    | 45.2% (35.2% to 56.6%)    |
| 42 | Ghana   | Non-venomous animal contact                     | 3 (1 to 6)       | 3 (1 to 5)       | -10% (-14.7% to -5.2%)    |
| 43 | Ghana   | Other exposure to mechanical forces             | 22 (11 to 41)    | 23 (11 to 42)    | 1.3% (-4.7% to 7.7%)      |
| 44 | Ghana   | Other road injuries                             | 3 (1 to 5)       | 3 (2 to 6)       | 22.4% (12.5% to 33.6%)    |
| 45 |         |                                                 |                  |                  |                           |
| 46 |         |                                                 |                  |                  |                           |

|    |           |                                                 |                  |                  |                           |
|----|-----------|-------------------------------------------------|------------------|------------------|---------------------------|
| 1  |           |                                                 |                  |                  |                           |
| 2  | Ghana     | Other transport injuries                        | 3 (2 to 4)       | 3 (2 to 4)       | 1.1% (-4.9% to 6.7%)      |
| 3  | Ghana     | Other unintentional injuries                    | 3 (1 to 5)       | 3 (1 to 5)       | -0.4% (-7.6% to 6.4%)     |
| 4  | Ghana     | Pedestrian road injuries                        | 70 (51 to 91)    | 83 (61 to 109)   | 18.3% (11.2% to 26.6%)    |
| 5  | Ghana     | Physical violence by firearm                    | 0 (0 to 0)       | 0 (0 to 0)       | 43.9% (22.7% to 64.3%)    |
| 6  | Ghana     | Physical violence by other means                | 5 (3 to 8)       | 5 (3 to 8)       | -4.8% (-11.1% to 1.5%)    |
| 7  | Ghana     | Physical violence by sharp object               | 2 (1 to 3)       | 1 (1 to 3)       | -6.2% (-13.7% to 1.9%)    |
| 8  | Ghana     | Poisoning by carbon monoxide                    | 0 (0 to 0)       | 0 (0 to 0)       | 16.9% (5.6% to 29.6%)     |
| 9  | Ghana     | Poisoning by other means                        | 0 (0 to 0)       | 0 (0 to 0)       | -7.9% (-14.9% to -0.6%)   |
| 10 | Ghana     | Pulmonary aspiration and foreign body in airway | 0 (0 to 0)       | 0 (0 to 0)       | -6% (-14.3% to 2.5%)      |
| 11 | Ghana     | Self-harm by firearm                            | 0 (0 to 0)       | 0 (0 to 0)       | 34.8% (25.2% to 45.2%)    |
| 12 | Ghana     | Self-harm by other specified means              | 0 (0 to 0)       | 0 (0 to 0)       | 27.3% (19.5% to 35.6%)    |
| 13 | Ghana     | Unintentional firearm injuries                  | 1 (0 to 2)       | 1 (0 to 2)       | -9.1% (-17.2% to 0.4%)    |
| 14 | Ghana     | Venomous animal contact                         | 0 (0 to 1)       | 0 (0 to 1)       | -14.7% (-22.2% to -8.2%)  |
| 15 | Greece    | Adverse effects of medical treatment            | 0 (0 to 0)       | 0 (0 to 0)       | 0% (0% to 0%)             |
| 16 | Greece    | Conflict and terrorism                          | 0 (0 to 0)       | 0 (0 to 0)       | NA                        |
| 17 | Greece    | Cyclist road injuries                           | 22 (16 to 31)    | 20 (14 to 27)    | -12.8% (-23.5% to -0.4%)  |
| 18 | Greece    | Drowning                                        | 0 (0 to 0)       | 0 (0 to 0)       | 52.8% (40.7% to 66.7%)    |
| 19 | Greece    | Environmental heat and cold exposure            | 2 (2 to 3)       | 2 (1 to 3)       | -2.9% (-7.4% to 1.6%)     |
| 20 | Greece    | Executions and police conflict                  | 0 (0 to 0)       | 0 (0 to 0)       | NA                        |
| 21 | Greece    | Exposure to forces of nature                    | 0 (0 to 0)       | 0 (0 to 0)       | NA                        |
| 22 | Greece    | Falls                                           | 217 (166 to 284) | 201 (152 to 270) | -7% (-12.5% to -1.4%)     |
| 23 | Greece    | Fire, heat, and hot substances                  | 2 (1 to 4)       | 2 (1 to 3)       | -13.9% (-19.7% to -9.1%)  |
| 24 | Greece    | Foreign body in eyes                            | 0 (0 to 0)       | 0 (0 to 0)       | 0% (0% to 0.2%)           |
| 25 | Greece    | Foreign body in other body part                 | 2 (1 to 3)       | 2 (1 to 3)       | 0.6% (-4.1% to 5.3%)      |
| 26 | Greece    | Motor vehicle road injuries                     | 60 (48 to 75)    | 32 (25 to 41)    | -46.5% (-53.7% to -39.2%) |
| 27 | Greece    | Motorcyclist road injuries                      | 14 (11 to 19)    | 16 (13 to 21)    | 13.5% (-5.7% to 35%)      |
| 28 | Greece    | Non-venomous animal contact                     | 2 (1 to 4)       | 2 (1 to 4)       | -8.8% (-13% to -4.1%)     |
| 29 | Greece    | Other exposure to mechanical forces             | 44 (27 to 71)    | 45 (28 to 72)    | 2.7% (-1.7% to 7.8%)      |
| 30 | Greece    | Other road injuries                             | 1 (1 to 2)       | 1 (1 to 2)       | -11.7% (-23.2% to 0.8%)   |
| 31 | Greece    | Other transport injuries                        | 4 (3 to 6)       | 5 (4 to 7)       | 14.4% (8.3% to 21.4%)     |
| 32 | Greece    | Other unintentional injuries                    | 28 (18 to 44)    | 21 (13 to 33)    | -25.5% (-32.8% to -19.4%) |
| 33 | Greece    | Pedestrian road injuries                        | 13 (10 to 17)    | 8 (6 to 10)      | -40.7% (-48.3% to -32.4%) |
| 34 | Greece    | Physical violence by firearm                    | 1 (0 to 1)       | 1 (0 to 1)       | 12.6% (1.6% to 25.2%)     |
| 35 | Greece    | Physical violence by other means                | 15 (10 to 22)    | 14 (10 to 20)    | -4.4% (-10.1% to 2.3%)    |
| 36 | Greece    | Physical violence by sharp object               | 2 (1 to 3)       | 1 (1 to 2)       | -11% (-18.9% to -2.5%)    |
| 37 | Greece    | Poisoning by carbon monoxide                    | 0 (0 to 0)       | 0 (0 to 0)       | 3.8% (-4.1% to 11.5%)     |
| 38 | Greece    | Poisoning by other means                        | 0 (0 to 0)       | 0 (0 to 0)       | -7.4% (-13.3% to -2.4%)   |
| 39 | Greece    | Pulmonary aspiration and foreign body in airway | 1 (1 to 2)       | 1 (0 to 1)       | -40% (-47.2% to -30.8%)   |
| 40 | Greece    | Self-harm by firearm                            | 0 (0 to 0)       | 0 (0 to 0)       | 11.1% (-0.2% to 23.6%)    |
| 41 | Greece    | Self-harm by other specified means              | 1 (1 to 2)       | 1 (1 to 2)       | 6.2% (1.4% to 11.6%)      |
| 42 | Greece    | Unintentional firearm injuries                  | 1 (1 to 2)       | 1 (1 to 2)       | -14.1% (-21% to -6.5%)    |
| 43 | Greece    | Venomous animal contact                         | 1 (0 to 2)       | 1 (0 to 2)       | -7.7% (-13% to -2.3%)     |
| 44 | Greenland | Adverse effects of medical treatment            | 0 (0 to 0)       | 0 (0 to 0)       | 0% (0% to 0%)             |
| 45 |           |                                                 |                  |                  |                           |
| 46 |           |                                                 |                  |                  |                           |

|    |           |                                                 |                  |                 |                           |
|----|-----------|-------------------------------------------------|------------------|-----------------|---------------------------|
| 1  |           |                                                 |                  |                 |                           |
| 2  | Greenland | Conflict and terrorism                          | 0 (0 to 0)       | 0 (0 to 0)      | NA                        |
| 3  | Greenland | Cyclist road injuries                           | 8 (5 to 13)      | 7 (4 to 10)     | -19.1% (-28.7% to -8.1%)  |
| 4  | Greenland | Drowning                                        | 0 (0 to 0)       | 0 (0 to 0)      | -8.1% (-16.6% to 0.5%)    |
| 5  | Greenland | Environmental heat and cold exposure            | 2 (1 to 3)       | 1 (1 to 2)      | -35.8% (-40.2% to -31.2%) |
| 6  | Greenland | Executions and police conflict                  | 0 (0 to 0)       | 0 (0 to 0)      | NA                        |
| 7  | Greenland | Exposure to forces of nature                    | 0 (0 to 0)       | 0 (0 to 0)      | NA                        |
| 8  | Greenland | Falls                                           | 163 (108 to 241) | 136 (91 to 196) | -16.7% (-19.8% to -13.1%) |
| 9  | Greenland | Fire, heat, and hot substances                  | 1 (1 to 2)       | 1 (0 to 1)      | -43.6% (-47.3% to -39.7%) |
| 10 | Greenland | Foreign body in eyes                            | 0 (0 to 0)       | 0 (0 to 0)      | -0.7% (-1.4% to 0%)       |
| 11 | Greenland | Foreign body in other body part                 | 2 (1 to 3)       | 2 (1 to 3)      | 0.1% (-3.6% to 3.9%)      |
| 12 | Greenland | Motor vehicle road injuries                     | 33 (24 to 45)    | 25 (18 to 35)   | -24.6% (-31% to -17.9%)   |
| 13 | Greenland | Motorcyclist road injuries                      | 10 (7 to 15)     | 9 (6 to 13)     | -11.7% (-19.8% to -3%)    |
| 14 | Greenland | Non-venomous animal contact                     | 5 (2 to 9)       | 3 (1 to 5)      | -40.9% (-49.8% to -33.9%) |
| 15 | Greenland | Other exposure to mechanical forces             | 135 (69 to 249)  | 81 (41 to 147)  | -40.1% (-44.5% to -35.4%) |
| 16 | Greenland | Other road injuries                             | 1 (1 to 3)       | 1 (1 to 2)      | -26.4% (-36.4% to -16.1%) |
| 17 | Greenland | Other transport injuries                        | 26 (19 to 35)    | 15 (11 to 20)   | -44% (-47.3% to -40.2%)   |
| 18 | Greenland | Other unintentional injuries                    | 13 (8 to 23)     | 9 (6 to 16)     | -28.9% (-33.9% to -23.6%) |
| 19 | Greenland | Pedestrian road injuries                        | 10 (7 to 14)     | 6 (4 to 8)      | -40.5% (-46.7% to -33.2%) |
| 20 | Greenland | Physical violence by firearm                    | 1 (0 to 1)       | 1 (0 to 1)      | 4.4% (-8.2% to 18.9%)     |
| 21 | Greenland | Physical violence by other means                | 39 (25 to 59)    | 27 (18 to 41)   | -28.8% (-33.3% to -23.9%) |
| 22 | Greenland | Physical violence by sharp object               | 7 (3 to 12)      | 4 (2 to 8)      | -33.8% (-40.8% to -25.1%) |
| 23 | Greenland | Poisoning by carbon monoxide                    | 0 (0 to 0)       | 0 (0 to 0)      | -39.1% (-48.6% to -28.6%) |
| 24 | Greenland | Poisoning by other means                        | 0 (0 to 0)       | 0 (0 to 0)      | -34.7% (-40.7% to -28.6%) |
| 25 | Greenland | Pulmonary aspiration and foreign body in airway | 0 (0 to 0)       | 0 (0 to 0)      | -27.3% (-33% to -21.8%)   |
| 26 | Greenland | Self-harm by firearm                            | 1 (0 to 1)       | 0 (0 to 1)      | -31.6% (-38.9% to -23.9%) |
| 27 | Greenland | Self-harm by other specified means              | 2 (1 to 4)       | 2 (1 to 3)      | -24.4% (-28.6% to -19.5%) |
| 28 | Greenland | Unintentional firearm injuries                  | 4 (2 to 7)       | 1 (1 to 3)      | -62.1% (-67.8% to -55.7%) |
| 29 | Greenland | Venomous animal contact                         | 1 (0 to 2)       | 1 (0 to 1)      | -0.7% (-8.7% to 11.4%)    |
| 30 | Grenada   | Adverse effects of medical treatment            | 0 (0 to 0)       | 0 (0 to 0)      | 0% (0% to 0%)             |
| 31 | Grenada   | Conflict and terrorism                          | 0 (0 to 0)       | 0 (0 to 0)      | NA                        |
| 32 | Grenada   | Cyclist road injuries                           | 30 (21 to 39)    | 25 (18 to 34)   | -14.6% (-22.5% to -5.5%)  |
| 33 | Grenada   | Drowning                                        | 0 (0 to 1)       | 0 (0 to 1)      | 15.2% (3.8% to 27.8%)     |
| 34 | Grenada   | Environmental heat and cold exposure            | 12 (8 to 17)     | 13 (9 to 18)    | 8% (3.8% to 12.6%)        |
| 35 | Grenada   | Executions and police conflict                  | 0 (0 to 0)       | 0 (0 to 0)      | NA                        |
| 36 | Grenada   | Exposure to forces of nature                    | 0 (0 to 0)       | 0 (0 to 0)      | NA                        |
| 37 | Grenada   | Falls                                           | 50 (39 to 64)    | 83 (65 to 106)  | 66.4% (60.5% to 73.4%)    |
| 38 | Grenada   | Fire, heat, and hot substances                  | 5 (3 to 8)       | 4 (3 to 7)      | -10.5% (-16.7% to -3.9%)  |
| 39 | Grenada   | Foreign body in eyes                            | 0 (0 to 0)       | 0 (0 to 0)      | 1.6% (0.7% to 2.9%)       |
| 40 | Grenada   | Foreign body in other body part                 | 1 (1 to 2)       | 1 (1 to 3)      | 0.3% (-5.4% to 6.6%)      |
| 41 | Grenada   | Motor vehicle road injuries                     | 28 (21 to 36)    | 23 (17 to 30)   | -16.5% (-24.8% to -7%)    |
| 42 | Grenada   | Motorcyclist road injuries                      | 14 (11 to 19)    | 17 (13 to 22)   | 18.2% (5.4% to 34.8%)     |
| 43 | Grenada   | Non-venomous animal contact                     | 3 (2 to 6)       | 4 (2 to 7)      | 12.3% (2.9% to 24.9%)     |
| 44 | Grenada   | Other exposure to mechanical forces             | 47 (29 to 75)    | 62 (38 to 99)   | 31.3% (21.6% to 41.6%)    |
| 45 |           |                                                 |                  |                 |                           |
| 46 |           |                                                 |                  |                 |                           |

|    |         |                                                 |               |               |                           |
|----|---------|-------------------------------------------------|---------------|---------------|---------------------------|
| 1  |         |                                                 |               |               |                           |
| 2  | Grenada | Other road injuries                             | 4 (2 to 6)    | 3 (2 to 6)    | -8.8% (-18.1% to 2.3%)    |
| 3  | Grenada | Other transport injuries                        | 5 (4 to 7)    | 6 (4 to 7)    | 13% (6% to 21.7%)         |
| 4  | Grenada | Other unintentional injuries                    | 16 (10 to 26) | 16 (10 to 25) | -1.8% (-7.2% to 4%)       |
| 5  | Grenada | Pedestrian road injuries                        | 13 (10 to 18) | 10 (7 to 13)  | -25% (-31.9% to -16.7%)   |
| 6  | Grenada | Physical violence by firearm                    | 0 (0 to 1)    | 1 (0 to 1)    | 51.3% (34.8% to 72.5%)    |
| 7  | Grenada | Physical violence by other means                | 9 (6 to 13)   | 14 (10 to 20) | 55.3% (40.9% to 72%)      |
| 8  | Grenada | Physical violence by sharp object               | 2 (1 to 3)    | 2 (1 to 3)    | -0.3% (-9.9% to 11.9%)    |
| 9  | Grenada | Poisoning by carbon monoxide                    | 0 (0 to 0)    | 0 (0 to 0)    | 27.3% (7.3% to 48.9%)     |
| 10 | Grenada | Poisoning by other means                        | 0 (0 to 0)    | 0 (0 to 0)    | -35.8% (-47.3% to -24.1%) |
| 11 | Grenada | Pulmonary aspiration and foreign body in airway | 1 (0 to 1)    | 0 (0 to 1)    | -23.9% (-30.7% to -16.8%) |
| 12 | Grenada | Self-harm by firearm                            | 0 (0 to 0)    | 0 (0 to 0)    | 8.8% (-2.2% to 20.6%)     |
| 13 | Grenada | Self-harm by other specified means              | 0 (0 to 1)    | 0 (0 to 1)    | -12.5% (-19.3% to -5.2%)  |
| 14 | Grenada | Unintentional firearm injuries                  | 5 (3 to 8)    | 5 (3 to 8)    | 1.1% (-11.7% to 13.9%)    |
| 15 | Grenada | Venomous animal contact                         | 5 (2 to 10)   | 5 (2 to 9)    | -9.3% (-15.6% to -3.1%)   |
| 16 | Guam    | Adverse effects of medical treatment            | 0 (0 to 0)    | 0 (0 to 0)    | 0% (0% to 0%)             |
| 17 | Guam    | Conflict and terrorism                          | 0 (0 to 0)    | 0 (0 to 0)    | NA                        |
| 18 | Guam    | Cyclist road injuries                           | 8 (5 to 12)   | 7 (4 to 11)   | -4.8% (-12.6% to 4.5%)    |
| 19 | Guam    | Drowning                                        | 0 (0 to 0)    | 0 (0 to 0)    | -0.4% (-7.6% to 7.8%)     |
| 20 | Guam    | Environmental heat and cold exposure            | 0 (0 to 1)    | 0 (0 to 1)    | 1.2% (-4.8% to 8.1%)      |
| 21 | Guam    | Executions and police conflict                  | 0 (0 to 0)    | 0 (0 to 0)    | NA                        |
| 22 | Guam    | Exposure to forces of nature                    | 0 (0 to 0)    | 0 (0 to 0)    | NA                        |
| 23 | Guam    | Falls                                           | 29 (18 to 44) | 38 (23 to 59) | 31.8% (26.6% to 36.6%)    |
| 24 | Guam    | Fire, heat, and hot substances                  | 0 (0 to 0)    | 0 (0 to 1)    | 11.7% (5.7% to 18.2%)     |
| 25 | Guam    | Foreign body in eyes                            | 0 (0 to 0)    | 0 (0 to 0)    | -1.1% (-2% to -0.5%)      |
| 26 | Guam    | Foreign body in other body part                 | 1 (0 to 2)    | 1 (0 to 2)    | -2.9% (-8.5% to 2.8%)     |
| 27 | Guam    | Motor vehicle road injuries                     | 42 (30 to 58) | 28 (19 to 39) | -34.3% (-40.6% to -28.6%) |
| 28 | Guam    | Motorcyclist road injuries                      | 25 (18 to 34) | 26 (19 to 35) | 2.9% (-6.4% to 13.4%)     |
| 29 | Guam    | Non-venomous animal contact                     | 2 (1 to 4)    | 2 (1 to 3)    | -7.2% (-11% to -2.6%)     |
| 30 | Guam    | Other exposure to mechanical forces             | 25 (12 to 46) | 19 (9 to 36)  | -23.4% (-29.9% to -17.1%) |
| 31 | Guam    | Other road injuries                             | 2 (1 to 4)    | 2 (1 to 4)    | -4.2% (-14% to 6.9%)      |
| 32 | Guam    | Other transport injuries                        | 4 (2 to 5)    | 3 (2 to 5)    | -10% (-16.2% to -5.1%)    |
| 33 | Guam    | Other unintentional injuries                    | 2 (1 to 4)    | 2 (1 to 3)    | -3.8% (-9.7% to 2%)       |
| 34 | Guam    | Pedestrian road injuries                        | 19 (13 to 26) | 15 (10 to 21) | -21.1% (-28% to -13.4%)   |
| 35 | Guam    | Physical violence by firearm                    | 0 (0 to 1)    | 0 (0 to 0)    | -50.6% (-59.6% to -41.3%) |
| 36 | Guam    | Physical violence by other means                | 33 (22 to 50) | 29 (19 to 43) | -13.6% (-19.2% to -7.8%)  |
| 37 | Guam    | Physical violence by sharp object               | 3 (2 to 7)    | 2 (1 to 4)    | -48.6% (-56% to -41.6%)   |
| 38 | Guam    | Poisoning by carbon monoxide                    | 0 (0 to 0)    | 0 (0 to 0)    | 8.1% (-1.4% to 18%)       |
| 39 | Guam    | Poisoning by other means                        | 0 (0 to 0)    | 0 (0 to 0)    | -4.3% (-11.3% to 2.1%)    |
| 40 | Guam    | Pulmonary aspiration and foreign body in airway | 0 (0 to 0)    | 0 (0 to 0)    | -2.4% (-11.8% to 9.5%)    |
| 41 | Guam    | Self-harm by firearm                            | 0 (0 to 0)    | 0 (0 to 0)    | 9.7% (-1.2% to 21.7%)     |
| 42 | Guam    | Self-harm by other specified means              | 0 (0 to 1)    | 0 (0 to 1)    | 23.5% (12.3% to 37.5%)    |
| 43 | Guam    | Unintentional firearm injuries                  | 1 (1 to 3)    | 1 (0 to 2)    | -27.4% (-36.5% to -19%)   |
| 44 | Guam    | Venomous animal contact                         | 1 (0 to 2)    | 1 (0 to 1)    | -10.1% (-16.8% to -3.7%)  |
| 45 |         |                                                 |               |               |                           |
| 46 |         |                                                 |               |               |                           |

|    |           |                                                 |                 |                 |                           |
|----|-----------|-------------------------------------------------|-----------------|-----------------|---------------------------|
| 1  |           |                                                 |                 |                 |                           |
| 2  | Guatemala | Adverse effects of medical treatment            | 0 (0 to 0)      | 0 (0 to 0)      | 0% (0% to 0%)             |
| 3  | Guatemala | Conflict and terrorism                          | 59 (18 to 152)  | 0 (0 to 0)      | NA                        |
| 4  | Guatemala | Cyclist road injuries                           | 14 (10 to 20)   | 13 (9 to 18)    | -9.2% (-16.6% to -0.4%)   |
| 5  | Guatemala | Drowning                                        | 0 (0 to 0)      | 0 (0 to 0)      | -8% (-18.7% to 3.9%)      |
| 6  | Guatemala | Environmental heat and cold exposure            | 3 (2 to 4)      | 4 (3 to 5)      | 37.1% (26.3% to 48.4%)    |
| 7  | Guatemala | Executions and police conflict                  | 0 (0 to 0)      | 0 (0 to 0)      | NA                        |
| 8  | Guatemala | Exposure to forces of nature                    | 0 (0 to 0)      | 0 (0 to 0)      | NA                        |
| 9  | Guatemala | Falls                                           | 110 (87 to 142) | 120 (93 to 153) | 8.6% (4.4% to 13.4%)      |
| 10 | Guatemala | Fire, heat, and hot substances                  | 5 (3 to 8)      | 3 (2 to 6)      | -33.1% (-39.7% to -26.4%) |
| 11 | Guatemala | Foreign body in eyes                            | 0 (0 to 0)      | 0 (0 to 0)      | -1.6% (-3.1% to -0.6%)    |
| 12 | Guatemala | Foreign body in other body part                 | 4 (2 to 7)      | 2 (1 to 4)      | -46.3% (-52.8% to -38.5%) |
| 13 | Guatemala | Motor vehicle road injuries                     | 19 (14 to 24)   | 24 (18 to 30)   | 27.6% (15.8% to 41.2%)    |
| 14 | Guatemala | Motorcyclist road injuries                      | 7 (6 to 10)     | 10 (8 to 13)    | 38.1% (26% to 53%)        |
| 15 | Guatemala | Non-venomous animal contact                     | 6 (3 to 11)     | 5 (3 to 9)      | -20% (-24.4% to -15.5%)   |
| 16 | Guatemala | Other exposure to mechanical forces             | 42 (25 to 69)   | 64 (38 to 104)  | 52.4% (36.8% to 74.4%)    |
| 17 | Guatemala | Other road injuries                             | 4 (2 to 6)      | 4 (2 to 6)      | 0.9% (-10.7% to 14.4%)    |
| 18 | Guatemala | Other transport injuries                        | 3 (2 to 5)      | 4 (3 to 5)      | 22% (9.2% to 39.3%)       |
| 19 | Guatemala | Other unintentional injuries                    | 19 (12 to 30)   | 15 (10 to 24)   | -19.6% (-24.9% to -13.6%) |
| 20 | Guatemala | Pedestrian road injuries                        | 20 (15 to 25)   | 16 (12 to 19)   | -20.5% (-28.1% to -11.5%) |
| 21 | Guatemala | Physical violence by firearm                    | 1 (1 to 2)      | 6 (4 to 8)      | 334% (256.7% to 434.3%)   |
| 22 | Guatemala | Physical violence by other means                | 46 (34 to 64)   | 25 (17 to 37)   | -45.3% (-52.5% to -36.8%) |
| 23 | Guatemala | Physical violence by sharp object               | 7 (4 to 10)     | 8 (5 to 12)     | 17.2% (-1.5% to 39.4%)    |
| 24 | Guatemala | Poisoning by carbon monoxide                    | 0 (0 to 0)      | 0 (0 to 0)      | 41.4% (22% to 67%)        |
| 25 | Guatemala | Poisoning by other means                        | 0 (0 to 0)      | 0 (0 to 0)      | -2.4% (-9.7% to 4.9%)     |
| 26 | Guatemala | Pulmonary aspiration and foreign body in airway | 1 (1 to 2)      | 0 (0 to 1)      | -55.1% (-60.1% to -49.2%) |
| 27 | Guatemala | Self-harm by firearm                            | 0 (0 to 0)      | 0 (0 to 0)      | -29.5% (-42.8% to -17.2%) |
| 28 | Guatemala | Self-harm by other specified means              | 0 (0 to 1)      | 0 (0 to 1)      | 30.6% (18.6% to 44.2%)    |
| 29 | Guatemala | Unintentional firearm injuries                  | 5 (3 to 7)      | 10 (6 to 15)    | 98.2% (71.8% to 131.6%)   |
| 30 | Guatemala | Venomous animal contact                         | 8 (3 to 14)     | 6 (3 to 12)     | -14.4% (-18.2% to -9.9%)  |
| 31 | Guinea    | Adverse effects of medical treatment            | 0 (0 to 0)      | 0 (0 to 0)      | 0% (0% to 0%)             |
| 32 | Guinea    | Conflict and terrorism                          | 0 (0 to 0)      | 0 (0 to 1)      | NA                        |
| 33 | Guinea    | Cyclist road injuries                           | 24 (15 to 36)   | 29 (18 to 43)   | 22.7% (14% to 32.1%)      |
| 34 | Guinea    | Drowning                                        | 0 (0 to 0)      | 0 (0 to 0)      | -8.8% (-15.3% to -3.2%)   |
| 35 | Guinea    | Environmental heat and cold exposure            | 0 (0 to 1)      | 0 (0 to 1)      | 6% (0.7% to 13.4%)        |
| 36 | Guinea    | Executions and police conflict                  | 0 (0 to 0)      | 0 (0 to 0)      | NA                        |
| 37 | Guinea    | Exposure to forces of nature                    | 0 (0 to 0)      | 0 (0 to 0)      | NA                        |
| 38 | Guinea    | Falls                                           | 16 (11 to 25)   | 19 (12 to 28)   | 15% (10.8% to 18.8%)      |
| 39 | Guinea    | Fire, heat, and hot substances                  | 0 (0 to 0)      | 0 (0 to 0)      | -1% (-6.2% to 4.3%)       |
| 40 | Guinea    | Foreign body in eyes                            | 0 (0 to 0)      | 0 (0 to 0)      | -0.1% (-0.4% to 0.1%)     |
| 41 | Guinea    | Foreign body in other body part                 | 4 (2 to 8)      | 4 (2 to 8)      | -5.1% (-9.7% to 0.8%)     |
| 42 | Guinea    | Motor vehicle road injuries                     | 47 (32 to 65)   | 56 (39 to 77)   | 19.8% (10.5% to 30%)      |
| 43 | Guinea    | Motorcyclist road injuries                      | 22 (15 to 30)   | 28 (20 to 38)   | 26.7% (16.8% to 37.6%)    |
| 44 | Guinea    | Non-venomous animal contact                     | 3 (1 to 6)      | 3 (1 to 6)      | 0.9% (-3.9% to 6.2%)      |
| 45 |           |                                                 |                 |                 |                           |
| 46 |           |                                                 |                 |                 |                           |

|    |               |                                                 |               |               |                           |
|----|---------------|-------------------------------------------------|---------------|---------------|---------------------------|
| 1  |               |                                                 |               |               |                           |
| 2  | Guinea        | Other exposure to mechanical forces             | 27 (13 to 50) | 24 (12 to 44) | -11.2% (-16.5% to -6.5%)  |
| 3  | Guinea        | Other road injuries                             | 2 (1 to 4)    | 2 (1 to 4)    | 14.2% (4.9% to 24.1%)     |
| 4  | Guinea        | Other transport injuries                        | 3 (2 to 4)    | 3 (2 to 4)    | -3.8% (-9% to 2%)         |
| 5  | Guinea        | Other unintentional injuries                    | 3 (2 to 5)    | 3 (2 to 5)    | -14% (-18.7% to -9.2%)    |
| 6  | Guinea        | Pedestrian road injuries                        | 52 (39 to 68) | 60 (43 to 80) | 14.4% (6.6% to 21.7%)     |
| 7  | Guinea        | Physical violence by firearm                    | 0 (0 to 0)    | 0 (0 to 0)    | 29% (17.6% to 41.9%)      |
| 8  | Guinea        | Physical violence by other means                | 7 (5 to 11)   | 9 (6 to 13)   | 19.6% (12.3% to 27.2%)    |
| 9  | Guinea        | Physical violence by sharp object               | 2 (1 to 3)    | 2 (1 to 4)    | 15.1% (6.7% to 25.1%)     |
| 10 | Guinea        | Poisoning by carbon monoxide                    | 0 (0 to 0)    | 0 (0 to 0)    | 5.5% (-4.9% to 17.2%)     |
| 11 | Guinea        | Poisoning by other means                        | 0 (0 to 0)    | 0 (0 to 0)    | -12% (-19.3% to -4.9%)    |
| 12 | Guinea        | Pulmonary aspiration and foreign body in airway | 0 (0 to 0)    | 0 (0 to 0)    | -8.2% (-17.7% to 3.2%)    |
| 13 | Guinea        | Self-harm by firearm                            | 0 (0 to 0)    | 0 (0 to 0)    | 42% (32.1% to 54.2%)      |
| 14 | Guinea        | Self-harm by other specified means              | 0 (0 to 0)    | 0 (0 to 0)    | 29.1% (22.3% to 36.1%)    |
| 15 | Guinea        | Unintentional firearm injuries                  | 1 (0 to 2)    | 1 (0 to 2)    | -14.5% (-21.3% to -7.4%)  |
| 16 | Guinea-Bissau | Venomous animal contact                         | 0 (0 to 1)    | 0 (0 to 1)    | 2.5% (-4.4% to 10.6%)     |
| 17 | Guinea-Bissau | Adverse effects of medical treatment            | 0 (0 to 0)    | 0 (0 to 0)    | 0% (0% to 0%)             |
| 18 | Guinea-Bissau | Conflict and terrorism                          | 0 (0 to 0)    | 0 (0 to 0)    | NA                        |
| 19 | Guinea-Bissau | Cyclist road injuries                           | 31 (20 to 46) | 33 (21 to 49) | 6.1% (-1.7% to 14.6%)     |
| 20 | Guinea-Bissau | Drowning                                        | 0 (0 to 0)    | 0 (0 to 0)    | -23.7% (-28.7% to -18.1%) |
| 21 | Guinea-Bissau | Environmental heat and cold exposure            | 0 (0 to 1)    | 0 (0 to 1)    | 0.5% (-5.5% to 6.6%)      |
| 22 | Guinea-Bissau | Executions and police conflict                  | 0 (0 to 0)    | 0 (0 to 0)    | NA                        |
| 23 | Guinea-Bissau | Exposure to forces of nature                    | 0 (0 to 0)    | 0 (0 to 0)    | NA                        |
| 24 | Guinea-Bissau | Falls                                           | 18 (12 to 27) | 20 (13 to 29) | 6.9% (2.6% to 11%)        |
| 25 | Guinea-Bissau | Fire, heat, and hot substances                  | 0 (0 to 0)    | 0 (0 to 0)    | -11.9% (-17.3% to -6.1%)  |
| 26 | Guinea-Bissau | Foreign body in eyes                            | 0 (0 to 0)    | 0 (0 to 0)    | -0.4% (-1.1% to 0.1%)     |
| 27 | Guinea-Bissau | Foreign body in other body part                 | 4 (2 to 8)    | 3 (1 to 7)    | -4.5% (-9.2% to 0.8%)     |
| 28 | Guinea-Bissau | Motor vehicle road injuries                     | 62 (42 to 90) | 64 (43 to 92) | 3% (-4.9% to 10.9%)       |
| 29 | Guinea-Bissau | Motorcyclist road injuries                      | 34 (24 to 47) | 32 (23 to 44) | -4.8% (-11.4% to 3%)      |
| 30 | Guinea-Bissau | Non-venomous animal contact                     | 3 (1 to 6)    | 3 (1 to 6)    | -6.3% (-10.6% to -1.8%)   |
| 31 | Guinea-Bissau | Other exposure to mechanical forces             | 26 (13 to 47) | 22 (11 to 41) | -12.7% (-18.3% to -6.6%)  |
| 32 | Guinea-Bissau | Other road injuries                             | 2 (1 to 4)    | 2 (1 to 4)    | 2.8% (-6% to 13%)         |
| 33 | Guinea-Bissau | Other transport injuries                        | 4 (3 to 5)    | 3 (2 to 5)    | -15.1% (-20.4% to -9.4%)  |
| 34 | Guinea-Bissau | Other unintentional injuries                    | 3 (2 to 5)    | 3 (2 to 5)    | -17.3% (-22.2% to -12.3%) |
| 35 | Guinea-Bissau | Pedestrian road injuries                        | 72 (52 to 98) | 71 (50 to 95) | -2% (-8.2% to 4.6%)       |
| 36 | Guinea-Bissau | Physical violence by firearm                    | 0 (0 to 0)    | 0 (0 to 0)    | 14.7% (5.4% to 25.4%)     |
| 37 | Guinea-Bissau | Physical violence by other means                | 9 (6 to 13)   | 10 (6 to 15)  | 10.6% (4.5% to 17.5%)     |
| 38 | Guinea-Bissau | Physical violence by sharp object               | 2 (1 to 4)    | 2 (1 to 4)    | 8.5% (0.6% to 17.6%)      |
| 39 | Guinea-Bissau | Poisoning by carbon monoxide                    | 0 (0 to 0)    | 0 (0 to 0)    | 5% (-6.5% to 17.3%)       |
| 40 | Guinea-Bissau | Poisoning by other means                        | 0 (0 to 0)    | 0 (0 to 0)    | -22.5% (-29.2% to -15%)   |
| 41 | Guinea-Bissau | Pulmonary aspiration and foreign body in airway | 0 (0 to 0)    | 0 (0 to 0)    | -20.3% (-29.4% to -10.2%) |
| 42 | Guinea-Bissau | Self-harm by firearm                            | 0 (0 to 0)    | 0 (0 to 0)    | 14.7% (7.3% to 23.3%)     |
| 43 | Guinea-Bissau | Self-harm by other specified means              | 0 (0 to 0)    | 0 (0 to 0)    | 6.2% (0.6% to 12.1%)      |
| 44 | Guinea-Bissau | Unintentional firearm injuries                  | 1 (0 to 2)    | 1 (0 to 2)    | -20% (-27.2% to -12.3%)   |
| 45 |               |                                                 |               |               |                           |
| 46 |               |                                                 |               |               |                           |

|    |               |                                                 |                |                 |                           |
|----|---------------|-------------------------------------------------|----------------|-----------------|---------------------------|
| 1  |               |                                                 |                |                 |                           |
| 2  | Guinea-Bissau | Venomous animal contact                         | 0 (0 to 1)     | 0 (0 to 1)      | -7.1% (-13.9% to 0.5%)    |
| 3  | Guyana        | Adverse effects of medical treatment            | 0 (0 to 0)     | 0 (0 to 0)      | 0% (0% to 0%)             |
| 4  | Guyana        | Conflict and terrorism                          | 0 (0 to 0)     | 0 (0 to 0)      | NA                        |
| 5  | Guyana        | Cyclist road injuries                           | 28 (20 to 37)  | 29 (21 to 39)   | 3.6% (-5.7% to 14.7%)     |
| 6  | Guyana        | Drowning                                        | 0 (0 to 1)     | 0 (0 to 1)      | 16.3% (5.9% to 27.1%)     |
| 7  | Guyana        | Environmental heat and cold exposure            | 15 (11 to 21)  | 15 (11 to 21)   | -1.9% (-6.3% to 2.4%)     |
| 8  | Guyana        | Executions and police conflict                  | 0 (0 to 0)     | 0 (0 to 0)      | NA                        |
| 9  | Guyana        | Exposure to forces of nature                    | 0 (0 to 0)     | 0 (0 to 0)      | NA                        |
| 10 | Guyana        | Falls                                           | 86 (69 to 108) | 106 (85 to 133) | 23.5% (18.9% to 28.3%)    |
| 11 | Guyana        | Fire, heat, and hot substances                  | 4 (3 to 7)     | 4 (2 to 6)      | -12.3% (-17.9% to -5.7%)  |
| 12 | Guyana        | Foreign body in eyes                            | 0 (0 to 0)     | 0 (0 to 0)      | -0.2% (-0.5% to 0.1%)     |
| 13 | Guyana        | Foreign body in other body part                 | 2 (1 to 5)     | 2 (1 to 3)      | -27.3% (-32.6% to -20.8%) |
| 14 | Guyana        | Motor vehicle road injuries                     | 22 (16 to 28)  | 27 (20 to 36)   | 25% (13.4% to 39.8%)      |
| 15 | Guyana        | Motorcyclist road injuries                      | 14 (10 to 18)  | 22 (17 to 29)   | 65.8% (47.7% to 87.9%)    |
| 16 | Guyana        | Non-venomous animal contact                     | 3 (2 to 6)     | 4 (2 to 6)      | 4% (-6% to 15.6%)         |
| 17 | Guyana        | Other exposure to mechanical forces             | 30 (18 to 48)  | 38 (22 to 62)   | 25.9% (19.3% to 33.2%)    |
| 18 | Guyana        | Other road injuries                             | 3 (2 to 5)     | 3 (2 to 5)      | 11.5% (0.6% to 23.8%)     |
| 19 | Guyana        | Other transport injuries                        | 7 (5 to 9)     | 8 (6 to 10)     | 11.4% (4.1% to 19.2%)     |
| 20 | Guyana        | Other unintentional injuries                    | 24 (16 to 38)  | 19 (12 to 29)   | -21.5% (-26.7% to -16.1%) |
| 21 | Guyana        | Pedestrian road injuries                        | 17 (13 to 21)  | 13 (10 to 17)   | -21% (-28.6% to -12.6%)   |
| 22 | Guyana        | Physical violence by firearm                    | 1 (0 to 1)     | 2 (1 to 2)      | 210.6% (169% to 263.8%)   |
| 23 | Guyana        | Physical violence by other means                | 15 (11 to 20)  | 17 (12 to 25)   | 18.5% (7.8% to 29.7%)     |
| 24 | Guyana        | Physical violence by sharp object               | 3 (2 to 5)     | 6 (3 to 9)      | 93.8% (68.7% to 128.5%)   |
| 25 | Guyana        | Poisoning by carbon monoxide                    | 0 (0 to 0)     | 0 (0 to 0)      | 26% (9.4% to 45.6%)       |
| 26 | Guyana        | Poisoning by other means                        | 0 (0 to 0)     | 0 (0 to 0)      | -11.2% (-21.8% to -1.1%)  |
| 27 | Guyana        | Pulmonary aspiration and foreign body in airway | 1 (0 to 1)     | 0 (0 to 1)      | -28.1% (-36.3% to -18.5%) |
| 28 | Guyana        | Self-harm by firearm                            | 0 (0 to 1)     | 1 (0 to 1)      | 33.7% (13.2% to 60.4%)    |
| 29 | Guyana        | Self-harm by other specified means              | 2 (1 to 3)     | 2 (1 to 3)      | 17.7% (9.1% to 26.5%)     |
| 30 | Guyana        | Unintentional firearm injuries                  | 3 (2 to 4)     | 3 (2 to 5)      | 19.7% (8.8% to 30.3%)     |
| 31 | Haiti         | Venomous animal contact                         | 8 (4 to 13)    | 12 (7 to 20)    | 55.8% (40.7% to 76.6%)    |
| 32 | Haiti         | Adverse effects of medical treatment            | 0 (0 to 0)     | 0 (0 to 0)      | 0% (0% to 0%)             |
| 33 | Haiti         | Conflict and terrorism                          | 1 (1 to 3)     | 0 (0 to 0)      | NA                        |
| 34 | Haiti         | Cyclist road injuries                           | 23 (16 to 31)  | 22 (15 to 30)   | -3.7% (-10% to 3.6%)      |
| 35 | Haiti         | Drowning                                        | 1 (0 to 1)     | 0 (0 to 1)      | -27.2% (-34.7% to -17.2%) |
| 36 | Haiti         | Environmental heat and cold exposure            | 18 (13 to 24)  | 16 (12 to 22)   | -9.8% (-13.3% to -5.9%)   |
| 37 | Haiti         | Executions and police conflict                  | 0 (0 to 0)     | 0 (0 to 0)      | NA                        |
| 38 | Haiti         | Exposure to forces of nature                    | 0 (0 to 0)     | 0 (0 to 0)      | NA                        |
| 39 | Haiti         | Falls                                           | 36 (28 to 46)  | 47 (37 to 60)   | 31.6% (26.2% to 36.7%)    |
| 40 | Haiti         | Fire, heat, and hot substances                  | 5 (3 to 8)     | 4 (2 to 6)      | -26.3% (-30.7% to -21.8%) |
| 41 | Haiti         | Foreign body in eyes                            | 0 (0 to 0)     | 0 (0 to 0)      | 0% (-0.5% to 0.4%)        |
| 42 | Haiti         | Foreign body in other body part                 | 1 (1 to 3)     | 1 (1 to 3)      | 2.5% (-3.3% to 10.5%)     |
| 43 | Haiti         | Motor vehicle road injuries                     | 17 (12 to 23)  | 17 (12 to 23)   | -1.4% (-8.5% to 6.5%)     |
| 44 | Haiti         | Motorcyclist road injuries                      | 16 (12 to 21)  | 18 (14 to 25)   | 17.7% (10.2% to 27.5%)    |
| 45 |               |                                                 |                |                 |                           |
| 46 |               |                                                 |                |                 |                           |

|    |          |                                                 |               |               |                           |
|----|----------|-------------------------------------------------|---------------|---------------|---------------------------|
| 1  |          |                                                 |               |               |                           |
| 2  | Haiti    | Non-venomous animal contact                     | 3 (2 to 6)    | 3 (2 to 6)    | 4.7% (-0.5% to 10.4%)     |
| 3  | Haiti    | Other exposure to mechanical forces             | 45 (26 to 77) | 45 (26 to 74) | -1.3% (-7.7% to 5.8%)     |
| 4  | Haiti    | Other road injuries                             | 2 (1 to 3)    | 2 (1 to 3)    | 7.3% (-1.3% to 17.3%)     |
| 5  | Haiti    | Other transport injuries                        | 6 (4 to 7)    | 5 (4 to 7)    | -6.1% (-10.6% to -1.1%)   |
| 6  | Haiti    | Other unintentional injuries                    | 16 (10 to 26) | 12 (8 to 20)  | -22% (-25.7% to -17.4%)   |
| 7  | Haiti    | Pedestrian road injuries                        | 13 (10 to 17) | 11 (8 to 14)  | -19.8% (-24.8% to -14.1%) |
| 8  | Haiti    | Physical violence by firearm                    | 1 (1 to 1)    | 1 (1 to 2)    | 26.7% (13.9% to 41.7%)    |
| 9  | Haiti    | Physical violence by other means                | 20 (14 to 28) | 19 (14 to 28) | -1.3% (-6.9% to 5.3%)     |
| 10 | Haiti    | Physical violence by sharp object               | 5 (3 to 8)    | 6 (4 to 9)    | 13.5% (4% to 25.2%)       |
| 11 | Haiti    | Poisoning by carbon monoxide                    | 0 (0 to 0)    | 0 (0 to 0)    | 15.4% (0.9% to 30.9%)     |
| 12 | Haiti    | Poisoning by other means                        | 0 (0 to 0)    | 0 (0 to 0)    | -21.7% (-28.3% to -15.1%) |
| 13 | Haiti    | Pulmonary aspiration and foreign body in airway | 1 (0 to 1)    | 0 (0 to 1)    | -35.6% (-43.4% to -27.6%) |
| 14 | Haiti    | Self-harm by firearm                            | 0 (0 to 0)    | 0 (0 to 0)    | -1.5% (-12.1% to 9.5%)    |
| 15 | Haiti    | Self-harm by other specified means              | 1 (0 to 1)    | 1 (0 to 1)    | -3.7% (-9.4% to 3.1%)     |
| 16 | Haiti    | Unintentional firearm injuries                  | 14 (9 to 20)  | 10 (6 to 15)  | -25.7% (-31.9% to -18.7%) |
| 17 | Honduras | Venomous animal contact                         | 6 (3 to 11)   | 7 (3 to 12)   | 5% (0.5% to 9.8%)         |
| 18 | Honduras | Adverse effects of medical treatment            | 0 (0 to 0)    | 0 (0 to 0)    | 0% (0% to 0%)             |
| 19 | Honduras | Conflict and terrorism                          | 1 (0 to 1)    | 0 (0 to 0)    | NA                        |
| 20 | Honduras | Cyclist road injuries                           | 20 (13 to 28) | 16 (11 to 23) | -18% (-25.6% to -9.8%)    |
| 21 | Honduras | Drowning                                        | 0 (0 to 0)    | 0 (0 to 0)    | 9% (-3.5% to 24.9%)       |
| 22 | Honduras | Environmental heat and cold exposure            | 3 (2 to 4)    | 3 (2 to 4)    | 0.2% (-4.2% to 5%)        |
| 23 | Honduras | Executions and police conflict                  | 0 (0 to 0)    | 0 (0 to 0)    | NA                        |
| 24 | Honduras | Exposure to forces of nature                    | 0 (0 to 0)    | 0 (0 to 0)    | NA                        |
| 25 | Honduras | Falls                                           | 64 (49 to 85) | 71 (54 to 96) | 11.4% (6.1% to 17.3%)     |
| 26 | Honduras | Fire, heat, and hot substances                  | 3 (2 to 5)    | 3 (2 to 5)    | 1.3% (-6.4% to 9.2%)      |
| 27 | Honduras | Foreign body in eyes                            | 0 (0 to 0)    | 0 (0 to 0)    | -0.8% (-1.5% to -0.3%)    |
| 28 | Honduras | Foreign body in other body part                 | 1 (1 to 2)    | 1 (1 to 2)    | 1% (-4% to 6.6%)          |
| 29 | Honduras | Motor vehicle road injuries                     | 30 (23 to 39) | 31 (24 to 40) | 2.1% (-6.2% to 11.8%)     |
| 30 | Honduras | Motorcyclist road injuries                      | 9 (7 to 12)   | 10 (8 to 14)  | 13.9% (2.6% to 26.2%)     |
| 31 | Honduras | Non-venomous animal contact                     | 6 (4 to 11)   | 6 (3 to 11)   | -7.7% (-13.5% to -1.8%)   |
| 32 | Honduras | Other exposure to mechanical forces             | 48 (29 to 79) | 44 (26 to 70) | -9.9% (-17.1% to -0.4%)   |
| 33 | Honduras | Other road injuries                             | 5 (3 to 8)    | 4 (2 to 7)    | -17.2% (-25% to -8.1%)    |
| 34 | Honduras | Other transport injuries                        | 4 (3 to 5)    | 4 (3 to 5)    | -4% (-10% to 2.2%)        |
| 35 | Honduras | Other unintentional injuries                    | 19 (12 to 30) | 14 (9 to 22)  | -27.4% (-33.5% to -20.7%) |
| 36 | Honduras | Pedestrian road injuries                        | 27 (21 to 33) | 20 (16 to 26) | -24.2% (-31.3% to -16.3%) |
| 37 | Honduras | Physical violence by firearm                    | 2 (2 to 3)    | 6 (4 to 9)    | 170.6% (133.6% to 218.7%) |
| 38 | Honduras | Physical violence by other means                | 38 (27 to 54) | 57 (40 to 82) | 50.9% (37.3% to 66.6%)    |
| 39 | Honduras | Physical violence by sharp object               | 11 (7 to 16)  | 18 (12 to 27) | 66.5% (47.6% to 89.5%)    |
| 40 | Honduras | Poisoning by carbon monoxide                    | 0 (0 to 0)    | 0 (0 to 0)    | 43.7% (23.7% to 65.2%)    |
| 41 | Honduras | Poisoning by other means                        | 0 (0 to 0)    | 0 (0 to 0)    | -18% (-27.4% to -8.2%)    |
| 42 | Honduras | Pulmonary aspiration and foreign body in airway | 0 (0 to 1)    | 0 (0 to 1)    | -10.4% (-22.4% to 2.4%)   |
| 43 | Honduras | Self-harm by firearm                            | 0 (0 to 0)    | 0 (0 to 0)    | -17.5% (-28.7% to -5.6%)  |
| 44 | Honduras | Self-harm by other specified means              | 0 (0 to 0)    | 0 (0 to 0)    | -11% (-20.2% to -1.1%)    |
| 45 |          |                                                 |               |               |                           |
| 46 |          |                                                 |               |               |                           |



|    |          |                                                 |                  |                  |                           |
|----|----------|-------------------------------------------------|------------------|------------------|---------------------------|
| 1  |          |                                                 |                  |                  |                           |
| 2  | Honduras | Unintentional firearm injuries                  | 5 (3 to 8)       | 3 (2 to 5)       | -34.2% (-41.2% to -26.8%) |
| 3  | Honduras | Venomous animal contact                         | 8 (4 to 15)      | 7 (4 to 14)      | -11.3% (-16.5% to -6.5%)  |
| 4  | Hungary  | Adverse effects of medical treatment            | 0 (0 to 0)       | 0 (0 to 0)       | 0% (0% to 0%)             |
| 5  | Hungary  | Conflict and terrorism                          | 0 (0 to 0)       | 0 (0 to 0)       | NA                        |
| 6  | Hungary  | Cyclist road injuries                           | 90 (68 to 116)   | 57 (42 to 77)    | -36.1% (-43.8% to -27.9%) |
| 7  | Hungary  | Drowning                                        | 0 (0 to 0)       | 0 (0 to 1)       | 58.2% (36% to 83.4%)      |
| 8  | Hungary  | Environmental heat and cold exposure            | 3 (2 to 4)       | 2 (2 to 3)       | -17.3% (-21.6% to -13%)   |
| 9  | Hungary  | Executions and police conflict                  | 0 (0 to 0)       | 0 (0 to 0)       | NA                        |
| 10 | Hungary  | Exposure to forces of nature                    | 0 (0 to 0)       | 0 (0 to 0)       | NA                        |
| 11 | Hungary  | Falls                                           | 448 (364 to 561) | 329 (255 to 421) | -26.6% (-32.2% to -20.2%) |
| 12 | Hungary  | Fire, heat, and hot substances                  | 4 (3 to 7)       | 4 (2 to 6)       | -19.2% (-26.6% to -12.9%) |
| 13 | Hungary  | Foreign body in eyes                            | 0 (0 to 0)       | 0 (0 to 0)       | 0.4% (0.2% to 0.8%)       |
| 14 | Hungary  | Foreign body in other body part                 | 2 (1 to 5)       | 2 (1 to 5)       | 0.5% (-4.9% to 6.3%)      |
| 15 | Hungary  | Motor vehicle road injuries                     | 126 (98 to 159)  | 80 (62 to 101)   | -36.6% (-43.8% to -27.8%) |
| 16 | Hungary  | Motorcyclist road injuries                      | 20 (15 to 26)    | 14 (10 to 19)    | -29.3% (-42.6% to -14.5%) |
| 17 | Hungary  | Non-venomous animal contact                     | 6 (3 to 11)      | 5 (3 to 9)       | -16.1% (-20.5% to -11.8%) |
| 18 | Hungary  | Other exposure to mechanical forces             | 136 (84 to 213)  | 130 (80 to 204)  | -4.4% (-10.7% to 0.7%)    |
| 19 | Hungary  | Other road injuries                             | 1 (1 to 2)       | 1 (1 to 2)       | -9.3% (-20.3% to 1.9%)    |
| 20 | Hungary  | Other transport injuries                        | 7 (5 to 9)       | 6 (4 to 8)       | -16.2% (-23.9% to -10%)   |
| 21 | Hungary  | Other unintentional injuries                    | 32 (20 to 53)    | 28 (17 to 47)    | -11.9% (-19% to -4.4%)    |
| 22 | Hungary  | Pedestrian road injuries                        | 41 (32 to 52)    | 25 (19 to 33)    | -38.6% (-47.2% to -29.1%) |
| 23 | Hungary  | Physical violence by firearm                    | 0 (0 to 0)       | 0 (0 to 1)       | 72.1% (52.4% to 93.1%)    |
| 24 | Hungary  | Physical violence by other means                | 30 (21 to 42)    | 24 (16 to 33)    | -21.2% (-28.7% to -12.9%) |
| 25 | Hungary  | Physical violence by sharp object               | 3 (2 to 5)       | 2 (1 to 3)       | -40.2% (-50.4% to -29.6%) |
| 26 | Hungary  | Poisoning by carbon monoxide                    | 0 (0 to 0)       | 0 (0 to 0)       | 30.9% (19% to 45.1%)      |
| 27 | Hungary  | Poisoning by other means                        | 0 (0 to 1)       | 0 (0 to 1)       | -4% (-11.6% to 3.7%)      |
| 28 | Hungary  | Pulmonary aspiration and foreign body in airway | 1 (1 to 2)       | 1 (1 to 2)       | -18.9% (-25.4% to -11.4%) |
| 29 | Hungary  | Self-harm by firearm                            | 1 (0 to 1)       | 1 (0 to 1)       | -14.8% (-26.8% to 1.3%)   |
| 30 | Hungary  | Self-harm by other specified means              | 6 (4 to 9)       | 3 (2 to 5)       | -43.6% (-47% to -40%)     |
| 31 | Hungary  | Unintentional firearm injuries                  | 1 (1 to 2)       | 1 (1 to 2)       | -0.5% (-9.6% to 9.1%)     |
| 32 | Hungary  | Venomous animal contact                         | 5 (2 to 9)       | 4 (2 to 8)       | -15.4% (-20.1% to -10.1%) |
| 33 | Iceland  | Adverse effects of medical treatment            | 0 (0 to 0)       | 0 (0 to 0)       | 0% (0% to 0%)             |
| 34 | Iceland  | Conflict and terrorism                          | 0 (0 to 0)       | 0 (0 to 0)       | NA                        |
| 35 | Iceland  | Cyclist road injuries                           | 21 (15 to 29)    | 16 (11 to 21)    | -25.8% (-34.6% to -16.1%) |
| 36 | Iceland  | Drowning                                        | 0 (0 to 0)       | 0 (0 to 0)       | 22.5% (11.1% to 35%)      |
| 37 | Iceland  | Environmental heat and cold exposure            | 2 (1 to 3)       | 2 (1 to 3)       | -4.3% (-9.2% to 0.2%)     |
| 38 | Iceland  | Executions and police conflict                  | 0 (0 to 0)       | 0 (0 to 0)       | NA                        |
| 39 | Iceland  | Exposure to forces of nature                    | 0 (0 to 0)       | 0 (0 to 0)       | NA                        |
| 40 | Iceland  | Falls                                           | 230 (179 to 296) | 258 (199 to 334) | 12.4% (8.6% to 17%)       |
| 41 | Iceland  | Fire, heat, and hot substances                  | 2 (1 to 4)       | 2 (1 to 4)       | -11.2% (-16.4% to -6.7%)  |
| 42 | Iceland  | Foreign body in eyes                            | 0 (0 to 0)       | 0 (0 to 0)       | 0.4% (0.2% to 0.8%)       |
| 43 | Iceland  | Foreign body in other body part                 | 2 (1 to 3)       | 2 (1 to 3)       | 1.3% (-3.1% to 6.3%)      |
| 44 | Iceland  | Motor vehicle road injuries                     | 42 (32 to 53)    | 19 (14 to 25)    | -54.3% (-59.9% to -48.4%) |
| 45 |          |                                                 |                  |                  |                           |
| 46 |          |                                                 |                  |                  |                           |

|    |         |                                                 |                  |                  |                           |
|----|---------|-------------------------------------------------|------------------|------------------|---------------------------|
| 1  |         |                                                 |                  |                  |                           |
| 2  | Iceland | Motorecyclist road injuries                     | 6 (5 to 8)       | 6 (4 to 8)       | -9% (-21.8% to 3.9%)      |
| 3  | Iceland | Non-venomous animal contact                     | 2 (1 to 4)       | 2 (1 to 4)       | -9.6% (-13.5% to -5.7%)   |
| 4  | Iceland | Other exposure to mechanical forces             | 51 (32 to 81)    | 45 (27 to 72)    | -12.8% (-19.8% to -6.6%)  |
| 5  | Iceland | Other road injuries                             | 1 (1 to 2)       | 1 (1 to 2)       | -19.4% (-29% to -7.4%)    |
| 6  | Iceland | Other transport injuries                        | 11 (8 to 14)     | 8 (6 to 10)      | -25.4% (-31% to -19.1%)   |
| 7  | Iceland | Other unintentional injuries                    | 24 (15 to 39)    | 21 (13 to 35)    | -11.3% (-16.9% to -6.1%)  |
| 8  | Iceland | Pedestrian road injuries                        | 9 (6 to 11)      | 6 (4 to 8)       | -34.9% (-44% to -24.2%)   |
| 9  | Iceland | Physical violence by firearm                    | 1 (0 to 1)       | 1 (0 to 1)       | 29.6% (18% to 43.2%)      |
| 10 | Iceland | Physical violence by other means                | 16 (11 to 22)    | 14 (10 to 21)    | -9% (-14.9% to -2.4%)     |
| 11 | Iceland | Physical violence by sharp object               | 1 (1 to 2)       | 1 (1 to 2)       | -7.9% (-16.4% to 1.3%)    |
| 12 | Iceland | Poisoning by carbon monoxide                    | 0 (0 to 0)       | 0 (0 to 0)       | -0.2% (-6.8% to 7.7%)     |
| 13 | Iceland | Poisoning by other means                        | 0 (0 to 0)       | 0 (0 to 0)       | -10% (-15.3% to -4.9%)    |
| 14 | Iceland | Pulmonary aspiration and foreign body in airway | 1 (1 to 2)       | 1 (1 to 2)       | -10.6% (-19.6% to 0.1%)   |
| 15 | Iceland | Self-harm by firearm                            | 1 (0 to 1)       | 0 (0 to 1)       | -35.7% (-44.3% to -25.7%) |
| 16 | Iceland | Self-harm by other specified means              | 4 (2 to 5)       | 3 (2 to 4)       | -26.6% (-30.9% to -22.1%) |
| 17 | Iceland | Unintentional firearm injuries                  | 1 (0 to 2)       | 1 (1 to 2)       | 5.8% (-2.8% to 16%)       |
| 18 | India   | Venomous animal contact                         | 1 (0 to 2)       | 1 (0 to 2)       | -10.1% (-15.2% to -4.4%)  |
| 19 | India   | Adverse effects of medical treatment            | 0 (0 to 0)       | 0 (0 to 0)       | 0% (0% to 0%)             |
| 20 | India   | Conflict and terrorism                          | 9 (4 to 20)      | 0 (0 to 1)       | NA                        |
| 21 | India   | Cyclist road injuries                           | 79 (57 to 107)   | 90 (65 to 123)   | 14.1% (10.4% to 18%)      |
| 22 | India   | Drowning                                        | 0 (0 to 1)       | 0 (0 to 1)       | -31.2% (-34.7% to -27.1%) |
| 23 | India   | Environmental heat and cold exposure            | 4 (3 to 5)       | 4 (3 to 5)       | -5% (-8.1% to -1.7%)      |
| 24 | India   | Executions and police conflict                  | 0 (0 to 0)       | 0 (0 to 0)       | NA                        |
| 25 | India   | Exposure to forces of nature                    | 1 (1 to 2)       | 0 (0 to 0)       | NA                        |
| 26 | India   | Falls                                           | 160 (126 to 204) | 179 (140 to 226) | 11.7% (8.3% to 15.2%)     |
| 27 | India   | Fire, heat, and hot substances                  | 1 (0 to 2)       | 1 (0 to 1)       | -11.3% (-14.5% to -8.3%)  |
| 28 | India   | Foreign body in eyes                            | 0 (0 to 0)       | 0 (0 to 0)       | -0.9% (-1.6% to -0.4%)    |
| 29 | India   | Foreign body in other body part                 | 1 (1 to 3)       | 1 (1 to 3)       | -1.7% (-3.7% to 0.4%)     |
| 30 | India   | Motor vehicle road injuries                     | 45 (32 to 60)    | 57 (40 to 76)    | 27% (22.7% to 31.1%)      |
| 31 | India   | Motorecyclist road injuries                     | 53 (40 to 70)    | 83 (63 to 110)   | 57.6% (51.6% to 62.9%)    |
| 32 | India   | Non-venomous animal contact                     | 14 (8 to 24)     | 10 (6 to 17)     | -30.1% (-33.2% to -26.7%) |
| 33 | India   | Other exposure to mechanical forces             | 11 (6 to 18)     | 10 (6 to 17)     | -3.9% (-8.5% to 0.9%)     |
| 34 | India   | Other road injuries                             | 2 (1 to 3)       | 2 (1 to 4)       | 14.9% (10.7% to 18.8%)    |
| 35 | India   | Other transport injuries                        | 7 (5 to 9)       | 7 (5 to 9)       | 3.4% (-0.2% to 6.6%)      |
| 36 | India   | Other unintentional injuries                    | 14 (9 to 23)     | 12 (8 to 18)     | -18.9% (-21.9% to -15.7%) |
| 37 | India   | Pedestrian road injuries                        | 53 (39 to 68)    | 61 (45 to 80)    | 15.6% (10.9% to 19.7%)    |
| 38 | India   | Physical violence by firearm                    | 0 (0 to 0)       | 0 (0 to 0)       | -7.4% (-14% to -0.2%)     |
| 39 | India   | Physical violence by other means                | 29 (21 to 41)    | 26 (18 to 36)    | -11.5% (-13.2% to -9.8%)  |
| 40 | India   | Physical violence by sharp object               | 1 (1 to 2)       | 1 (1 to 2)       | -15.3% (-19.8% to -10.3%) |
| 41 | India   | Poisoning by carbon monoxide                    | 0 (0 to 0)       | 0 (0 to 0)       | 8.3% (-1.7% to 17.2%)     |
| 42 | India   | Poisoning by other means                        | 0 (0 to 0)       | 0 (0 to 0)       | 2.2% (-6.6% to 9.5%)      |
| 43 | India   | Pulmonary aspiration and foreign body in airway | 1 (0 to 1)       | 0 (0 to 1)       | -18.6% (-22.1% to -15.1%) |
| 44 | India   | Self-harm by firearm                            | 1 (0 to 1)       | 0 (0 to 1)       | -1.9% (-7.3% to 2.7%)     |
| 45 |         |                                                 |                  |                  |                           |
| 46 |         |                                                 |                  |                  |                           |

|    |                            |                                                 |                  |                |                           |
|----|----------------------------|-------------------------------------------------|------------------|----------------|---------------------------|
| 1  |                            |                                                 |                  |                |                           |
| 2  | India                      | Self-harm by other specified means              | 3 (2 to 6)       | 3 (1 to 4)     | -25.7% (-29.2% to -22.1%) |
| 3  | India                      | Unintentional firearm injuries                  | 1 (0 to 1)       | 1 (0 to 1)     | -5% (-9.8% to -0.2%)      |
| 4  | India                      | Venomous animal contact                         | 9 (4 to 18)      | 5 (2 to 10)    | -48.4% (-53.5% to -44.3%) |
| 5  | Indonesia                  | Adverse effects of medical treatment            | 0 (0 to 0)       | 0 (0 to 0)     | 0% (0% to 0%)             |
| 6  | Indonesia                  | Conflict and terrorism                          | 1 (0 to 1)       | 0 (0 to 0)     | NA                        |
| 7  | Indonesia                  | Cyclist road injuries                           | 13 (7 to 20)     | 11 (7 to 18)   | -11.2% (-17.1% to -5.6%)  |
| 8  | Indonesia                  | Drowning                                        | 0 (0 to 0)       | 0 (0 to 0)     | -8.9% (-14.9% to -2.9%)   |
| 9  | Indonesia                  | Environmental heat and cold exposure            | 1 (0 to 1)       | 0 (0 to 1)     | -12.6% (-17% to -8.3%)    |
| 10 | Indonesia                  | Executions and police conflict                  | 0 (0 to 0)       | 0 (0 to 0)     | NA                        |
| 11 | Indonesia                  | Exposure to forces of nature                    | 1 (0 to 1)       | 0 (0 to 1)     | NA                        |
| 12 | Indonesia                  | Falls                                           | 38 (24 to 57)    | 36 (23 to 54)  | -5.4% (-7.6% to -3.2%)    |
| 13 | Indonesia                  | Fire, heat, and hot substances                  | 0 (0 to 0)       | 0 (0 to 0)     | 2.8% (-1.8% to 7.1%)      |
| 14 | Indonesia                  | Foreign body in eyes                            | 0 (0 to 0)       | 0 (0 to 0)     | 0.5% (0.2% to 0.9%)       |
| 15 | Indonesia                  | Foreign body in other body part                 | 2 (1 to 4)       | 2 (1 to 3)     | -8.7% (-10.7% to -6.5%)   |
| 16 | Indonesia                  | Motor vehicle road injuries                     | 29 (18 to 42)    | 20 (12 to 30)  | -31% (-35.6% to -27%)     |
| 17 | Indonesia                  | Motorcyclist road injuries                      | 52 (38 to 69)    | 52 (38 to 69)  | 0.5% (-4.5% to 6.2%)      |
| 18 | Indonesia                  | Non-venomous animal contact                     | 3 (1 to 6)       | 2 (1 to 4)     | -37.4% (-43.2% to -32.7%) |
| 19 | Indonesia                  | Other exposure to mechanical forces             | 32 (15 to 60)    | 28 (13 to 54)  | -12.5% (-18.9% to -6.5%)  |
| 20 | Indonesia                  | Other road injuries                             | 2 (1 to 4)       | 2 (1 to 4)     | -18.5% (-28% to -9.4%)    |
| 21 | Indonesia                  | Other transport injuries                        | 5 (3 to 7)       | 3 (2 to 4)     | -44.4% (-50.5% to -38.4%) |
| 22 | Indonesia                  | Other unintentional injuries                    | 6 (3 to 11)      | 5 (3 to 10)    | -9.5% (-19.5% to -2%)     |
| 23 | Indonesia                  | Pedestrian road injuries                        | 24 (17 to 34)    | 14 (10 to 20)  | -41.3% (-44.6% to -38.4%) |
| 24 | Indonesia                  | Physical violence by firearm                    | 0 (0 to 0)       | 0 (0 to 0)     | 38.9% (27.6% to 50.5%)    |
| 25 | Indonesia                  | Physical violence by other means                | 10 (6 to 16)     | 11 (7 to 16)   | 4.9% (-0.9% to 10.8%)     |
| 26 | Indonesia                  | Physical violence by sharp object               | 2 (1 to 3)       | 2 (1 to 3)     | -4.4% (-11.4% to 1.9%)    |
| 27 | Indonesia                  | Poisoning by carbon monoxide                    | 0 (0 to 0)       | 0 (0 to 0)     | 1% (-2.6% to 5.6%)        |
| 28 | Indonesia                  | Poisoning by other means                        | 0 (0 to 0)       | 0 (0 to 0)     | -12.7% (-15% to -10.1%)   |
| 29 | Indonesia                  | Pulmonary aspiration and foreign body in airway | 0 (0 to 0)       | 0 (0 to 0)     | -35.8% (-41.8% to -28.8%) |
| 30 | Indonesia                  | Self-harm by firearm                            | 0 (0 to 0)       | 0 (0 to 0)     | -21.1% (-26.4% to -16.3%) |
| 31 | Indonesia                  | Self-harm by other specified means              | 0 (0 to 0)       | 0 (0 to 0)     | -14.4% (-17.7% to -10.6%) |
| 32 | Indonesia                  | Unintentional firearm injuries                  | 2 (1 to 4)       | 1 (1 to 3)     | -15.1% (-22.1% to -8.7%)  |
| 33 | Indonesia                  | Venomous animal contact                         | 0 (0 to 1)       | 0 (0 to 1)     | 6.9% (-5.8% to 25.8%)     |
| 34 | Iran (Islamic Republic of) | Adverse effects of medical treatment            | 0 (0 to 0)       | 0 (0 to 0)     | 0% (0% to 0%)             |
| 35 | Iran (Islamic Republic of) | Conflict and terrorism                          | 16 (6 to 39)     | 0 (0 to 1)     | NA                        |
| 36 | Iran (Islamic Republic of) | Cyclist road injuries                           | 19 (13 to 28)    | 16 (11 to 23)  | -16.5% (-21.7% to -11.6%) |
| 37 | Iran (Islamic Republic of) | Drowning                                        | 1 (0 to 1)       | 0 (0 to 0)     | -57.3% (-62% to -52.4%)   |
| 38 | Iran (Islamic Republic of) | Environmental heat and cold exposure            | 3 (2 to 5)       | 3 (2 to 5)     | 6.9% (5.3% to 8.7%)       |
| 39 | Iran (Islamic Republic of) | Executions and police conflict                  | 4 (2 to 8)       | 0 (0 to 0)     | NA                        |
| 40 | Iran (Islamic Republic of) | Exposure to forces of nature                    | 494 (301 to 754) | 1 (1 to 2)     | NA                        |
| 41 | Iran (Islamic Republic of) | Falls                                           | 98 (74 to 131)   | 94 (73 to 124) | -3.3% (-6.3% to 0.2%)     |
| 42 | Iran (Islamic Republic of) | Fire, heat, and hot substances                  | 1 (1 to 2)       | 1 (0 to 1)     | -34.4% (-37.7% to -31.2%) |
| 43 | Iran (Islamic Republic of) | Foreign body in eyes                            | 0 (0 to 0)       | 0 (0 to 0)     | -0.1% (-0.7% to 0.3%)     |
| 44 | Iran (Islamic Republic of) | Foreign body in other body part                 | 2 (1 to 3)       | 2 (1 to 3)     | 0.5% (-0.8% to 1.6%)      |
| 45 |                            |                                                 |                  |                |                           |
| 46 |                            |                                                 |                  |                |                           |

|    |                            |                                                 |                |                |                           |
|----|----------------------------|-------------------------------------------------|----------------|----------------|---------------------------|
| 1  |                            |                                                 |                |                |                           |
| 2  | Iran (Islamic Republic of) | Motor vehicle road injuries                     | 52 (39 to 68)  | 33 (25 to 44)  | -35.7% (-38.2% to -33%)   |
| 3  | Iran (Islamic Republic of) | Motorcyclist road injuries                      | 23 (17 to 31)  | 15 (11 to 20)  | -37.4% (-40.3% to -34.5%) |
| 4  | Iran (Islamic Republic of) | Non-venomous animal contact                     | 4 (2 to 7)     | 4 (2 to 6)     | -6.8% (-9.7% to -3.6%)    |
| 5  | Iran (Islamic Republic of) | Other exposure to mechanical forces             | 32 (20 to 51)  | 27 (17 to 44)  | -15% (-17.2% to -13.2%)   |
| 6  | Iran (Islamic Republic of) | Other road injuries                             | 2 (1 to 3)     | 2 (1 to 3)     | 3% (-2.5% to 8.8%)        |
| 7  | Iran (Islamic Republic of) | Other transport injuries                        | 7 (5 to 9)     | 7 (5 to 9)     | 3.1% (1% to 5.4%)         |
| 8  | Iran (Islamic Republic of) | Other unintentional injuries                    | 17 (11 to 28)  | 15 (9 to 24)   | -15.6% (-19.1% to -11.8%) |
| 9  | Iran (Islamic Republic of) | Pedestrian road injuries                        | 34 (25 to 44)  | 25 (18 to 32)  | -27.9% (-31% to -25.2%)   |
| 10 | Iran (Islamic Republic of) | Physical violence by firearm                    | 0 (0 to 1)     | 1 (0 to 1)     | 55.1% (45% to 65.8%)      |
| 11 | Iran (Islamic Republic of) | Physical violence by other means                | 14 (10 to 20)  | 15 (10 to 22)  | 6.5% (3.4% to 9.4%)       |
| 12 | Iran (Islamic Republic of) | Physical violence by sharp object               | 1 (1 to 2)     | 2 (1 to 2)     | 19% (11.4% to 26.7%)      |
| 13 | Iran (Islamic Republic of) | Poisoning by carbon monoxide                    | 0 (0 to 0)     | 0 (0 to 0)     | -36.8% (-45.2% to -28.6%) |
| 14 | Iran (Islamic Republic of) | Poisoning by other means                        | 0 (0 to 0)     | 0 (0 to 0)     | -36.1% (-42.1% to -30.3%) |
| 15 | Iran (Islamic Republic of) | Pulmonary aspiration and foreign body in airway | 0 (0 to 1)     | 0 (0 to 1)     | -25.2% (-31.3% to -19.1%) |
| 16 | Iran (Islamic Republic of) | Self-harm by firearm                            | 0 (0 to 0)     | 0 (0 to 0)     | 9.5% (3.8% to 15.6%)      |
| 17 | Iran (Islamic Republic of) | Self-harm by other specified means              | 2 (1 to 3)     | 1 (1 to 2)     | -17.2% (-20.2% to -13.9%) |
| 18 | Iran (Islamic Republic of) | Unintentional firearm injuries                  | 2 (1 to 3)     | 1 (1 to 2)     | -12.3% (-15.3% to -9%)    |
| 19 | Iraq                       | Venomous animal contact                         | 2 (1 to 5)     | 2 (1 to 4)     | -14.9% (-19.8% to -11.6%) |
| 20 | Iraq                       | Adverse effects of medical treatment            | 0 (0 to 0)     | 0 (0 to 0)     | 0% (0% to 0%)             |
| 21 | Iraq                       | Conflict and terrorism                          | 71 (29 to 161) | 25 (10 to 57)  | NA                        |
| 22 | Iraq                       | Cyclist road injuries                           | 15 (10 to 21)  | 13 (9 to 19)   | -10.2% (-17.5% to -1.2%)  |
| 23 | Iraq                       | Drowning                                        | 0 (0 to 0)     | 0 (0 to 0)     | 29.8% (13.7% to 47.3%)    |
| 24 | Iraq                       | Environmental heat and cold exposure            | 3 (2 to 4)     | 3 (2 to 4)     | 2.3% (-3.3% to 8.5%)      |
| 25 | Iraq                       | Executions and police conflict                  | 0 (0 to 0)     | 0 (0 to 0)     | NA                        |
| 26 | Iraq                       | Exposure to forces of nature                    | 0 (0 to 0)     | 0 (0 to 0)     | NA                        |
| 27 | Iraq                       | Falls                                           | 79 (61 to 105) | 85 (64 to 112) | 6.7% (1.2% to 12%)        |
| 28 | Iraq                       | Fire, heat, and hot substances                  | 1 (1 to 2)     | 1 (0 to 1)     | -26.5% (-32.3% to -20.4%) |
| 29 | Iraq                       | Foreign body in eyes                            | 0 (0 to 0)     | 0 (0 to 0)     | 0% (-0.1% to 0.2%)        |
| 30 | Iraq                       | Foreign body in other body part                 | 1 (1 to 3)     | 1 (1 to 3)     | 3.9% (-1% to 7.9%)        |
| 31 | Iraq                       | Motor vehicle road injuries                     | 32 (25 to 41)  | 27 (20 to 34)  | -17.8% (-24.2% to -10.6%) |
| 32 | Iraq                       | Motorcyclist road injuries                      | 9 (7 to 12)    | 8 (6 to 10)    | -15% (-22.5% to -6%)      |
| 33 | Iraq                       | Non-venomous animal contact                     | 4 (2 to 7)     | 3 (2 to 6)     | -15.9% (-23.6% to -8.9%)  |
| 34 | Iraq                       | Other exposure to mechanical forces             | 74 (46 to 116) | 60 (38 to 95)  | -19.3% (-25% to -12.7%)   |
| 35 | Iraq                       | Other road injuries                             | 2 (1 to 3)     | 2 (1 to 3)     | -5.6% (-14.7% to 4.9%)    |
| 36 | Iraq                       | Other transport injuries                        | 5 (3 to 6)     | 5 (4 to 7)     | 5.5% (0.1% to 12%)        |
| 37 | Iraq                       | Other unintentional injuries                    | 40 (26 to 64)  | 29 (19 to 46)  | -28.4% (-33.2% to -23.2%) |
| 38 | Iraq                       | Pedestrian road injuries                        | 24 (18 to 30)  | 17 (13 to 21)  | -31.1% (-36.6% to -25%)   |
| 39 | Iraq                       | Physical violence by firearm                    | 1 (0 to 1)     | 2 (1 to 2)     | 219.1% (183.8% to 263.1%) |
| 40 | Iraq                       | Physical violence by other means                | 25 (18 to 35)  | 32 (23 to 44)  | 28.2% (18.4% to 40.1%)    |
| 41 | Iraq                       | Physical violence by sharp object               | 2 (1 to 3)     | 2 (1 to 4)     | 18% (4.8% to 33.2%)       |
| 42 | Iraq                       | Poisoning by carbon monoxide                    | 0 (0 to 0)     | 0 (0 to 0)     | 44.4% (29.8% to 60.4%)    |
| 43 | Iraq                       | Poisoning by other means                        | 0 (0 to 0)     | 0 (0 to 0)     | -5.9% (-13.3% to 2.3%)    |
| 44 | Iraq                       | Pulmonary aspiration and foreign body in airway | 0 (0 to 1)     | 0 (0 to 0)     | -22.3% (-30.7% to -14.2%) |
| 45 |                            |                                                 |                |                |                           |
| 46 |                            |                                                 |                |                |                           |

|    |         |                                                 |                  |                  |                           |
|----|---------|-------------------------------------------------|------------------|------------------|---------------------------|
| 1  |         |                                                 |                  |                  |                           |
| 2  | Iraq    | Self-harm by firearm                            | 0 (0 to 1)       | 0 (0 to 1)       | 17.4% (4.6% to 32.2%)     |
| 3  | Iraq    | Self-harm by other specified means              | 1 (1 to 2)       | 1 (1 to 2)       | 18% (10.8% to 26%)        |
| 4  | Iraq    | Unintentional firearm injuries                  | 5 (3 to 7)       | 4 (3 to 6)       | -6.5% (-16% to 4.4%)      |
| 5  | Iraq    | Venomous animal contact                         | 2 (1 to 4)       | 2 (1 to 4)       | 8.2% (-0.9% to 19.9%)     |
| 6  | Ireland | Adverse effects of medical treatment            | 0 (0 to 0)       | 0 (0 to 0)       | 0% (0% to 0%)             |
| 7  | Ireland | Conflict and terrorism                          | 0 (0 to 0)       | 0 (0 to 0)       | NA                        |
| 8  | Ireland | Cyclist road injuries                           | 29 (21 to 38)    | 17 (12 to 23)    | -39.9% (-49.5% to -29.6%) |
| 9  | Ireland | Drowning                                        | 0 (0 to 0)       | 0 (0 to 0)       | 49.7% (34.2% to 66.5%)    |
| 10 | Ireland | Environmental heat and cold exposure            | 2 (2 to 3)       | 2 (1 to 3)       | -7.8% (-13.2% to -2.7%)   |
| 11 | Ireland | Executions and police conflict                  | 0 (0 to 0)       | 0 (0 to 0)       | NA                        |
| 12 | Ireland | Exposure to forces of nature                    | 0 (0 to 0)       | 0 (0 to 0)       | NA                        |
| 13 | Ireland | Falls                                           | 215 (166 to 278) | 249 (191 to 323) | 15.5% (10.6% to 20.7%)    |
| 14 | Ireland | Fire, heat, and hot substances                  | 3 (2 to 5)       | 2 (1 to 4)       | -23.1% (-29.8% to -16.4%) |
| 15 | Ireland | Foreign body in eyes                            | 0 (0 to 0)       | 0 (0 to 0)       | 0% (-0.3% to 0.4%)        |
| 16 | Ireland | Foreign body in other body part                 | 2 (1 to 3)       | 2 (1 to 3)       | 2.2% (-2.5% to 7.6%)      |
| 17 | Ireland | Motor vehicle road injuries                     | 35 (27 to 44)    | 18 (13 to 24)    | -49.4% (-57.7% to -39.7%) |
| 18 | Ireland | Motorcyclist road injuries                      | 9 (7 to 12)      | 6 (4 to 8)       | -37.8% (-50.8% to -22%)   |
| 19 | Ireland | Non-venomous animal contact                     | 3 (1 to 5)       | 2 (1 to 3)       | -25% (-29.1% to -21.6%)   |
| 20 | Ireland | Other exposure to mechanical forces             | 55 (34 to 88)    | 44 (27 to 71)    | -19.8% (-27.8% to -12.7%) |
| 21 | Ireland | Other road injuries                             | 1 (1 to 2)       | 1 (1 to 2)       | -13.2% (-27.2% to 3.2%)   |
| 22 | Ireland | Other transport injuries                        | 5 (4 to 7)       | 5 (3 to 7)       | -9.8% (-15.9% to -2.1%)   |
| 23 | Ireland | Other unintentional injuries                    | 27 (17 to 45)    | 24 (15 to 39)    | -12.9% (-20.1% to -6.2%)  |
| 24 | Ireland | Pedestrian road injuries                        | 11 (8 to 14)     | 6 (4 to 8)       | -45.8% (-56.1% to -34.2%) |
| 25 | Ireland | Physical violence by firearm                    | 0 (0 to 1)       | 1 (0 to 1)       | 47.6% (34.8% to 63.3%)    |
| 26 | Ireland | Physical violence by other means                | 13 (9 to 19)     | 13 (9 to 19)     | -0.2% (-6.6% to 6.5%)     |
| 27 | Ireland | Physical violence by sharp object               | 1 (1 to 2)       | 1 (1 to 2)       | -10% (-19.7% to -0.3%)    |
| 28 | Ireland | Poisoning by carbon monoxide                    | 0 (0 to 0)       | 0 (0 to 0)       | 15.2% (5.7% to 25%)       |
| 29 | Ireland | Poisoning by other means                        | 0 (0 to 0)       | 0 (0 to 0)       | -5.7% (-11.2% to 0.2%)    |
| 30 | Ireland | Pulmonary aspiration and foreign body in airway | 1 (1 to 2)       | 1 (0 to 1)       | -14% (-23% to -4.3%)      |
| 31 | Ireland | Self-harm by firearm                            | 0 (0 to 1)       | 0 (0 to 0)       | -16.2% (-31.1% to -1.2%)  |
| 32 | Ireland | Self-harm by other specified means              | 3 (2 to 5)       | 3 (2 to 5)       | -7% (-13.1% to -0.9%)     |
| 33 | Ireland | Unintentional firearm injuries                  | 1 (1 to 2)       | 1 (1 to 2)       | 0.4% (-11.1% to 11.5%)    |
| 34 | Ireland | Venomous animal contact                         | 1 (0 to 2)       | 1 (0 to 2)       | -22.8% (-27.5% to -18.3%) |
| 35 | Israel  | Adverse effects of medical treatment            | 0 (0 to 0)       | 0 (0 to 0)       | 0% (0% to 0%)             |
| 36 | Israel  | Conflict and terrorism                          | 12 (5 to 28)     | 0 (0 to 1)       | NA                        |
| 37 | Israel  | Cyclist road injuries                           | 22 (15 to 29)    | 19 (13 to 25)    | -13.5% (-22.4% to -3.3%)  |
| 38 | Israel  | Drowning                                        | 0 (0 to 0)       | 0 (0 to 0)       | 48.6% (31.3% to 67.1%)    |
| 39 | Israel  | Environmental heat and cold exposure            | 2 (2 to 3)       | 2 (2 to 3)       | -4.5% (-9.9% to 0.6%)     |
| 40 | Israel  | Executions and police conflict                  | 0 (0 to 0)       | 0 (0 to 0)       | NA                        |
| 41 | Israel  | Exposure to forces of nature                    | 0 (0 to 0)       | 0 (0 to 0)       | NA                        |
| 42 | Israel  | Falls                                           | 163 (124 to 213) | 195 (146 to 260) | 20.1% (15.2% to 24.5%)    |
| 43 | Israel  | Fire, heat, and hot substances                  | 2 (1 to 4)       | 2 (1 to 3)       | -9.9% (-14.9% to -5.2%)   |
| 44 | Israel  | Foreign body in eyes                            | 0 (0 to 0)       | 0 (0 to 0)       | 0.3% (0.1% to 0.7%)       |
| 45 |         |                                                 |                  |                  |                           |
| 46 |         |                                                 |                  |                  |                           |

|    |        |                                                 |                  |                  |                           |
|----|--------|-------------------------------------------------|------------------|------------------|---------------------------|
| 1  |        |                                                 |                  |                  |                           |
| 2  | Israel | Foreign body in other body part                 | 2 (1 to 4)       | 2 (1 to 3)       | -8.2% (-13.1% to -3.2%)   |
| 3  | Israel | Motor vehicle road injuries                     | 39 (30 to 49)    | 23 (17 to 29)    | -41.8% (-48.3% to -34.6%) |
| 4  | Israel | Motorcyclist road injuries                      | 7 (5 to 9)       | 8 (6 to 11)      | 21.7% (4.8% to 41.3%)     |
| 5  | Israel | Non-venomous animal contact                     | 2 (1 to 4)       | 2 (1 to 4)       | -15.4% (-19.3% to -11.2%) |
| 6  | Israel | Other exposure to mechanical forces             | 55 (34 to 86)    | 44 (26 to 70)    | -19% (-26.2% to -12%)     |
| 7  | Israel | Other road injuries                             | 1 (1 to 2)       | 1 (1 to 2)       | -15.8% (-25.8% to -5.5%)  |
| 8  | Israel | Other transport injuries                        | 4 (3 to 6)       | 4 (3 to 6)       | -4.1% (-7.8% to -0.1%)    |
| 9  | Israel | Other unintentional injuries                    | 29 (18 to 46)    | 23 (14 to 36)    | -21.1% (-26.4% to -15.1%) |
| 10 | Israel | Pedestrian road injuries                        | 12 (9 to 15)     | 8 (6 to 10)      | -34.8% (-42.2% to -27.4%) |
| 11 | Israel | Physical violence by firearm                    | 1 (0 to 1)       | 1 (1 to 2)       | 97.3% (72.2% to 127.6%)   |
| 12 | Israel | Physical violence by other means                | 22 (16 to 32)    | 21 (15 to 30)    | -6.2% (-14.9% to 2.4%)    |
| 13 | Israel | Physical violence by sharp object               | 3 (2 to 4)       | 3 (2 to 5)       | 16.4% (1.1% to 33.1%)     |
| 14 | Israel | Poisoning by carbon monoxide                    | 0 (0 to 0)       | 0 (0 to 0)       | 6% (-3.2% to 15.6%)       |
| 15 | Israel | Poisoning by other means                        | 0 (0 to 0)       | 0 (0 to 0)       | -8.4% (-14.9% to -1.9%)   |
| 16 | Israel | Pulmonary aspiration and foreign body in airway | 1 (1 to 2)       | 1 (1 to 2)       | -27.1% (-33.4% to -19.4%) |
| 17 | Israel | Self-harm by firearm                            | 0 (0 to 1)       | 0 (0 to 0)       | -30.9% (-41% to -20.3%)   |
| 18 | Israel | Self-harm by other specified means              | 2 (1 to 3)       | 2 (1 to 2)       | -17.8% (-22.9% to -12.8%) |
| 19 | Israel | Unintentional firearm injuries                  | 2 (1 to 3)       | 1 (1 to 2)       | -37.4% (-46.9% to -28.2%) |
| 20 | Israel | Venomous animal contact                         | 1 (0 to 2)       | 1 (0 to 2)       | -15.2% (-20.6% to -9.7%)  |
| 21 | Italy  | Adverse effects of medical treatment            | 0 (0 to 0)       | 0 (0 to 0)       | 0% (0% to 0%)             |
| 22 | Italy  | Conflict and terrorism                          | 0 (0 to 0)       | 0 (0 to 0)       | NA                        |
| 23 | Italy  | Cyclist road injuries                           | 25 (17 to 36)    | 18 (13 to 24)    | -28.8% (-33.9% to -23.4%) |
| 24 | Italy  | Drowning                                        | 0 (0 to 0)       | 0 (0 to 0)       | 2.3% (-1.8% to 5.5%)      |
| 25 | Italy  | Environmental heat and cold exposure            | 4 (2 to 6)       | 2 (2 to 4)       | -37.3% (-43.1% to -31%)   |
| 26 | Italy  | Executions and police conflict                  | 0 (0 to 0)       | 0 (0 to 0)       | NA                        |
| 27 | Italy  | Exposure to forces of nature                    | 0 (0 to 0)       | 0 (0 to 0)       | NA                        |
| 28 | Italy  | Falls                                           | 276 (215 to 355) | 231 (179 to 299) | -16.3% (-20.8% to -11.9%) |
| 29 | Italy  | Fire, heat, and hot substances                  | 2 (1 to 3)       | 1 (1 to 2)       | -39.3% (-45.5% to -30.7%) |
| 30 | Italy  | Foreign body in eyes                            | 0 (0 to 0)       | 0 (0 to 0)       | 0.6% (0.2% to 1.2%)       |
| 31 | Italy  | Foreign body in other body part                 | 2 (1 to 5)       | 2 (1 to 5)       | -5.9% (-16.8% to 6.9%)    |
| 32 | Italy  | Motor vehicle road injuries                     | 37 (26 to 50)    | 27 (19 to 36)    | -27.2% (-31.6% to -22.4%) |
| 33 | Italy  | Motorcyclist road injuries                      | 17 (12 to 24)    | 17 (12 to 23)    | 0.5% (-7.5% to 9.7%)      |
| 34 | Italy  | Non-venomous animal contact                     | 2 (1 to 4)       | 1 (0 to 1)       | -64.7% (-70.5% to -56%)   |
| 35 | Italy  | Other exposure to mechanical forces             | 50 (30 to 82)    | 31 (19 to 49)    | -38% (-41.5% to -34%)     |
| 36 | Italy  | Other road injuries                             | 3 (2 to 5)       | 3 (2 to 5)       | 9.4% (1.5% to 19%)        |
| 37 | Italy  | Other transport injuries                        | 5 (4 to 7)       | 5 (4 to 7)       | 4.9% (2.7% to 7.6%)       |
| 38 | Italy  | Other unintentional injuries                    | 29 (17 to 48)    | 16 (10 to 25)    | -45.9% (-49.4% to -41.5%) |
| 39 | Italy  | Pedestrian road injuries                        | 10 (7 to 14)     | 7 (5 to 9)       | -29.5% (-34.1% to -24.1%) |
| 40 | Italy  | Physical violence by firearm                    | 2 (1 to 2)       | 1 (1 to 2)       | -37% (-44.4% to -27.6%)   |
| 41 | Italy  | Physical violence by other means                | 18 (11 to 26)    | 10 (6 to 14)     | -45.4% (-48.4% to -41.5%) |
| 42 | Italy  | Physical violence by sharp object               | 2 (1 to 4)       | 1 (1 to 2)       | -43.5% (-49.5% to -35.8%) |
| 43 | Italy  | Poisoning by carbon monoxide                    | 0 (0 to 0)       | 0 (0 to 0)       | -29.2% (-41.2% to -8.3%)  |
| 44 | Italy  | Poisoning by other means                        | 0 (0 to 1)       | 0 (0 to 0)       | -47% (-51.5% to -41.3%)   |
| 45 |        |                                                 |                  |                  |                           |
| 46 |        |                                                 |                  |                  |                           |

|    |         |                                                 |                 |                 |                           |
|----|---------|-------------------------------------------------|-----------------|-----------------|---------------------------|
| 1  |         |                                                 |                 |                 |                           |
| 2  | Italy   | Pulmonary aspiration and foreign body in airway | 1 (1 to 2)      | 1 (1 to 2)      | -6.9% (-13.3% to -0.5%)   |
| 3  | Italy   | Self-harm by firearm                            | 0 (0 to 1)      | 0 (0 to 1)      | -4.8% (-13% to 6%)        |
| 4  | Italy   | Self-harm by other specified means              | 2 (1 to 3)      | 1 (1 to 2)      | -37.7% (-41.6% to -34.2%) |
| 5  | Italy   | Unintentional firearm injuries                  | 2 (1 to 3)      | 1 (0 to 2)      | -44.7% (-50.8% to -36.8%) |
| 6  | Italy   | Venomous animal contact                         | 2 (1 to 5)      | 1 (0 to 1)      | -70.5% (-75.4% to -64%)   |
| 7  | Jamaica | Adverse effects of medical treatment            | 0 (0 to 0)      | 0 (0 to 0)      | 0% (0% to 0%)             |
| 8  | Jamaica | Conflict and terrorism                          | 6 (2 to 14)     | 0 (0 to 0)      | NA                        |
| 9  | Jamaica | Cyclist road injuries                           | 23 (17 to 31)   | 21 (16 to 29)   | -6.6% (-14.6% to 1.4%)    |
| 10 | Jamaica | Drowning                                        | 0 (0 to 0)      | 0 (0 to 1)      | 49.8% (30% to 71.5%)      |
| 11 | Jamaica | Environmental heat and cold exposure            | 10 (7 to 15)    | 11 (8 to 16)    | 6.3% (1.9% to 10.7%)      |
| 12 | Jamaica | Executions and police conflict                  | 0 (0 to 0)      | 0 (0 to 0)      | NA                        |
| 13 | Jamaica | Exposure to forces of nature                    | 0 (0 to 0)      | 0 (0 to 0)      | NA                        |
| 14 | Jamaica | Falls                                           | 41 (31 to 55)   | 59 (46 to 78)   | 42.7% (37.4% to 49%)      |
| 15 | Jamaica | Fire, heat, and hot substances                  | 4 (2 to 6)      | 4 (2 to 6)      | -0.3% (-5.7% to 7.1%)     |
| 16 | Jamaica | Foreign body in eyes                            | 0 (0 to 0)      | 0 (0 to 0)      | 0.6% (0.3% to 1.1%)       |
| 17 | Jamaica | Foreign body in other body part                 | 2 (1 to 5)      | 1 (1 to 3)      | -42.4% (-50.1% to -35.2%) |
| 18 | Jamaica | Motor vehicle road injuries                     | 14 (10 to 18)   | 16 (12 to 21)   | 20.4% (9.4% to 33.1%)     |
| 19 | Jamaica | Motorcyclist road injuries                      | 9 (7 to 12)     | 9 (7 to 12)     | -1.1% (-11% to 8.4%)      |
| 20 | Jamaica | Non-venomous animal contact                     | 4 (2 to 7)      | 3 (2 to 5)      | -20.8% (-25.1% to -16.2%) |
| 21 | Jamaica | Other exposure to mechanical forces             | 50 (28 to 84)   | 49 (28 to 83)   | -0.8% (-8.1% to 7.6%)     |
| 22 | Jamaica | Other road injuries                             | 3 (2 to 6)      | 3 (2 to 5)      | -9% (-18% to 0.7%)        |
| 23 | Jamaica | Other transport injuries                        | 5 (4 to 7)      | 4 (3 to 6)      | -14.2% (-19.4% to -7.9%)  |
| 24 | Jamaica | Other unintentional injuries                    | 16 (10 to 27)   | 15 (9 to 25)    | -7.7% (-13.4% to -1.9%)   |
| 25 | Jamaica | Pedestrian road injuries                        | 9 (7 to 12)     | 10 (7 to 13)    | 7.7% (-1.3% to 16.8%)     |
| 26 | Jamaica | Physical violence by firearm                    | 2 (1 to 3)      | 3 (2 to 4)      | 27.5% (11.6% to 45.7%)    |
| 27 | Jamaica | Physical violence by other means                | 14 (10 to 21)   | 15 (10 to 22)   | 5.9% (-3.6% to 17.3%)     |
| 28 | Jamaica | Physical violence by sharp object               | 6 (4 to 10)     | 5 (3 to 8)      | -14.9% (-23.5% to -5.2%)  |
| 29 | Jamaica | Poisoning by carbon monoxide                    | 0 (0 to 0)      | 0 (0 to 0)      | 6.1% (-4.8% to 16.8%)     |
| 30 | Jamaica | Poisoning by other means                        | 0 (0 to 0)      | 0 (0 to 0)      | -1.2% (-7.8% to 5.7%)     |
| 31 | Jamaica | Pulmonary aspiration and foreign body in airway | 1 (0 to 1)      | 1 (0 to 1)      | 7% (-5.1% to 21.3%)       |
| 32 | Jamaica | Self-harm by firearm                            | 0 (0 to 0)      | 0 (0 to 0)      | 38.7% (23.8% to 60.1%)    |
| 33 | Jamaica | Self-harm by other specified means              | 0 (0 to 0)      | 0 (0 to 0)      | 8.2% (-0.1% to 16.1%)     |
| 34 | Jamaica | Unintentional firearm injuries                  | 14 (9 to 21)    | 11 (7 to 16)    | -23.6% (-32.4% to -14%)   |
| 35 | Jamaica | Venomous animal contact                         | 6 (3 to 12)     | 5 (3 to 10)     | -18.5% (-22% to -14.2%)   |
| 36 | Japan   | Adverse effects of medical treatment            | 0 (0 to 0)      | 0 (0 to 0)      | 0% (0% to 0%)             |
| 37 | Japan   | Conflict and terrorism                          | 0 (0 to 0)      | 0 (0 to 0)      | NA                        |
| 38 | Japan   | Cyclist road injuries                           | 20 (13 to 28)   | 12 (8 to 18)    | -39.5% (-43.4% to -35.7%) |
| 39 | Japan   | Drowning                                        | 0 (0 to 1)      | 1 (0 to 1)      | 26.9% (22.8% to 31.7%)    |
| 40 | Japan   | Environmental heat and cold exposure            | 2 (1 to 3)      | 2 (1 to 3)      | 6.4% (4.2% to 9.2%)       |
| 41 | Japan   | Executions and police conflict                  | 0 (0 to 0)      | 0 (0 to 0)      | NA                        |
| 42 | Japan   | Exposure to forces of nature                    | 0 (0 to 0)      | 0 (0 to 0)      | NA                        |
| 43 | Japan   | Falls                                           | 112 (81 to 154) | 110 (79 to 153) | -1.9% (-4.4% to 0.5%)     |
| 44 | Japan   | Fire, heat, and hot substances                  | 2 (1 to 2)      | 1 (1 to 2)      | -10.4% (-14.6% to -6.9%)  |
| 45 |         |                                                 |                 |                 |                           |
| 46 |         |                                                 |                 |                 |                           |

|    |        |                                                 |                |                |                           |
|----|--------|-------------------------------------------------|----------------|----------------|---------------------------|
| 1  |        |                                                 |                |                |                           |
| 2  | Japan  | Foreign body in eyes                            | 0 (0 to 0)     | 0 (0 to 0)     | -2.8% (-4.2% to -1.1%)    |
| 3  | Japan  | Foreign body in other body part                 | 3 (1 to 7)     | 3 (1 to 7)     | -3.4% (-4.7% to -1.9%)    |
| 4  | Japan  | Motor vehicle road injuries                     | 30 (20 to 41)  | 15 (10 to 22)  | -47.5% (-50.5% to -44.6%) |
| 5  | Japan  | Motorcyclist road injuries                      | 20 (14 to 27)  | 11 (7 to 15)   | -46.2% (-49.5% to -42.9%) |
| 6  | Japan  | Non-venomous animal contact                     | 5 (3 to 10)    | 5 (2 to 8)     | -15.2% (-16.6% to -13.9%) |
| 7  | Japan  | Other exposure to mechanical forces             | 91 (48 to 162) | 82 (43 to 148) | -9.2% (-13.2% to -6.4%)   |
| 8  | Japan  | Other road injuries                             | 2 (1 to 3)     | 1 (1 to 2)     | -21.9% (-26% to -17.1%)   |
| 9  | Japan  | Other transport injuries                        | 5 (4 to 7)     | 5 (3 to 6)     | -8.3% (-11.5% to -5.3%)   |
| 10 | Japan  | Other unintentional injuries                    | 23 (14 to 40)  | 20 (12 to 35)  | -13.2% (-15.8% to -10.5%) |
| 11 | Japan  | Pedestrian road injuries                        | 11 (8 to 14)   | 6 (4 to 9)     | -39.7% (-45.1% to -34.1%) |
| 12 | Japan  | Physical violence by firearm                    | 0 (0 to 1)     | 1 (0 to 1)     | 44.7% (37.8% to 52.8%)    |
| 13 | Japan  | Physical violence by other means                | 12 (8 to 17)   | 12 (8 to 18)   | 2.2% (-1.9% to 6.3%)      |
| 14 | Japan  | Physical violence by sharp object               | 1 (1 to 2)     | 1 (1 to 2)     | 3.7% (-1.8% to 8.9%)      |
| 15 | Japan  | Poisoning by carbon monoxide                    | 0 (0 to 0)     | 0 (0 to 0)     | 7.1% (4% to 10.3%)        |
| 16 | Japan  | Poisoning by other means                        | 0 (0 to 0)     | 0 (0 to 0)     | -7.4% (-9.7% to -5.1%)    |
| 17 | Japan  | Pulmonary aspiration and foreign body in airway | 0 (0 to 1)     | 0 (0 to 1)     | -15.1% (-17.5% to -12.4%) |
| 18 | Japan  | Self-harm by firearm                            | 0 (0 to 0)     | 0 (0 to 0)     | 36.5% (26% to 45.8%)      |
| 19 | Japan  | Self-harm by other specified means              | 2 (1 to 4)     | 2 (2 to 4)     | 6.5% (2.7% to 10.7%)      |
| 20 | Japan  | Unintentional firearm injuries                  | 1 (0 to 2)     | 1 (0 to 2)     | -1% (-5.3% to 3%)         |
| 21 | Japan  | Venomous animal contact                         | 2 (1 to 4)     | 1 (0 to 3)     | -15.3% (-17.4% to -12.9%) |
| 22 | Jordan | Adverse effects of medical treatment            | 0 (0 to 0)     | 0 (0 to 0)     | 0% (0% to 0%)             |
| 23 | Jordan | Conflict and terrorism                          | 0 (0 to 0)     | 0 (0 to 0)     | NA                        |
| 24 | Jordan | Cyclist road injuries                           | 15 (10 to 21)  | 14 (10 to 19)  | -7.3% (-15.6% to 3.1%)    |
| 25 | Jordan | Drowning                                        | 0 (0 to 0)     | 0 (0 to 1)     | 99.6% (70.2% to 130.9%)   |
| 26 | Jordan | Environmental heat and cold exposure            | 3 (2 to 4)     | 3 (2 to 4)     | 0.4% (-5.4% to 5.7%)      |
| 27 | Jordan | Executions and police conflict                  | 0 (0 to 0)     | 0 (0 to 0)     | NA                        |
| 28 | Jordan | Exposure to forces of nature                    | 0 (0 to 0)     | 0 (0 to 0)     | NA                        |
| 29 | Jordan | Falls                                           | 70 (54 to 91)  | 85 (65 to 114) | 22.6% (16.2% to 29.7%)    |
| 30 | Jordan | Fire, heat, and hot substances                  | 1 (1 to 2)     | 1 (0 to 1)     | -34.7% (-41.5% to -28.1%) |
| 31 | Jordan | Foreign body in eyes                            | 0 (0 to 0)     | 0 (0 to 0)     | 1% (0.4% to 1.9%)         |
| 32 | Jordan | Foreign body in other body part                 | 1 (1 to 3)     | 1 (1 to 3)     | 1.7% (-4% to 7.4%)        |
| 33 | Jordan | Motor vehicle road injuries                     | 35 (28 to 45)  | 24 (19 to 31)  | -31.6% (-37% to -25.4%)   |
| 34 | Jordan | Motorcyclist road injuries                      | 8 (6 to 11)    | 6 (4 to 7)     | -29% (-36.5% to -20.4%)   |
| 35 | Jordan | Non-venomous animal contact                     | 3 (2 to 6)     | 3 (2 to 6)     | 3% (-1.3% to 8.7%)        |
| 36 | Jordan | Other exposure to mechanical forces             | 22 (13 to 35)  | 21 (12 to 34)  | -3.5% (-12.7% to 4.7%)    |
| 37 | Jordan | Other road injuries                             | 2 (1 to 3)     | 2 (1 to 3)     | -8% (-17.8% to 3%)        |
| 38 | Jordan | Other transport injuries                        | 8 (6 to 11)    | 7 (5 to 9)     | -21% (-26.7% to -15.1%)   |
| 39 | Jordan | Other unintentional injuries                    | 19 (12 to 30)  | 16 (10 to 26)  | -16.8% (-24% to -8.7%)    |
| 40 | Jordan | Pedestrian road injuries                        | 25 (20 to 31)  | 16 (12 to 21)  | -36.3% (-41.5% to -30.2%) |
| 41 | Jordan | Physical violence by firearm                    | 0 (0 to 1)     | 1 (1 to 1)     | 133.4% (105.7% to 166.4%) |
| 42 | Jordan | Physical violence by other means                | 17 (12 to 23)  | 16 (11 to 22)  | -4.7% (-11.3% to 2.2%)    |
| 43 | Jordan | Physical violence by sharp object               | 2 (1 to 4)     | 2 (1 to 3)     | -4.7% (-14.4% to 5.1%)    |
| 44 | Jordan | Poisoning by carbon monoxide                    | 0 (0 to 0)     | 0 (0 to 0)     | 4% (-9.4% to 18.3%)       |
| 45 |        |                                                 |                |                |                           |
| 46 |        |                                                 |                |                |                           |



|    |            |                                                 |                  |                  |                           |
|----|------------|-------------------------------------------------|------------------|------------------|---------------------------|
| 1  |            |                                                 |                  |                  |                           |
| 2  | Jordan     | Poisoning by other means                        | 0 (0 to 0)       | 0 (0 to 0)       | -27.1% (-36.1% to -17.9%) |
| 3  | Jordan     | Pulmonary aspiration and foreign body in airway | 0 (0 to 1)       | 0 (0 to 1)       | -18% (-25.8% to -10.6%)   |
| 4  | Jordan     | Self-harm by firearm                            | 0 (0 to 0)       | 0 (0 to 0)       | 16.1% (3.4% to 32.1%)     |
| 5  | Jordan     | Self-harm by other specified means              | 1 (1 to 1)       | 1 (0 to 1)       | -18.7% (-25.4% to -11.6%) |
| 6  | Jordan     | Unintentional firearm injuries                  | 2 (1 to 3)       | 2 (1 to 3)       | 9.8% (-2.9% to 22.6%)     |
| 7  | Jordan     | Venomous animal contact                         | 2 (1 to 4)       | 2 (1 to 4)       | 2% (-3.8% to 7.6%)        |
| 8  | Kazakhstan | Adverse effects of medical treatment            | 0 (0 to 0)       | 0 (0 to 0)       | 0% (0% to 0%)             |
| 9  | Kazakhstan | Conflict and terrorism                          | 0 (0 to 0)       | 0 (0 to 0)       | NA                        |
| 10 | Kazakhstan | Cyclist road injuries                           | 25 (17 to 35)    | 25 (16 to 34)    | -2.1% (-12.6% to 9.8%)    |
| 11 | Kazakhstan | Drowning                                        | 1 (0 to 1)       | 1 (0 to 1)       | 1.6% (-9.3% to 13.9%)     |
| 12 | Kazakhstan | Environmental heat and cold exposure            | 4 (3 to 6)       | 6 (5 to 9)       | 63.4% (42.2% to 88.6%)    |
| 13 | Kazakhstan | Executions and police conflict                  | 0 (0 to 0)       | 0 (0 to 0)       | NA                        |
| 14 | Kazakhstan | Exposure to forces of nature                    | 0 (0 to 0)       | 0 (0 to 0)       | NA                        |
| 15 | Kazakhstan | Falls                                           | 162 (124 to 214) | 173 (133 to 225) | 7.3% (2.3% to 12.4%)      |
| 16 | Kazakhstan | Fire, heat, and hot substances                  | 5 (3 to 8)       | 3 (2 to 6)       | -24.7% (-32.4% to -17%)   |
| 17 | Kazakhstan | Foreign body in eyes                            | 0 (0 to 0)       | 0 (0 to 0)       | 0.6% (0.3% to 1.3%)       |
| 18 | Kazakhstan | Foreign body in other body part                 | 2 (1 to 4)       | 2 (1 to 4)       | -0.2% (-5.7% to 5.2%)     |
| 19 | Kazakhstan | Motor vehicle road injuries                     | 88 (70 to 111)   | 89 (69 to 110)   | 0.4% (-10.1% to 10.6%)    |
| 20 | Kazakhstan | Motorcyclist road injuries                      | 6 (4 to 8)       | 5 (4 to 7)       | -11.2% (-23.1% to 2.2%)   |
| 21 | Kazakhstan | Non-venomous animal contact                     | 3 (1 to 5)       | 2 (1 to 4)       | -16.1% (-21.2% to -10.8%) |
| 22 | Kazakhstan | Other exposure to mechanical forces             | 78 (50 to 120)   | 67 (42 to 104)   | -14.4% (-21% to -7.9%)    |
| 23 | Kazakhstan | Other road injuries                             | 2 (1 to 4)       | 2 (1 to 4)       | -1% (-12.5% to 11.2%)     |
| 24 | Kazakhstan | Other transport injuries                        | 5 (4 to 7)       | 5 (3 to 6)       | -11.2% (-18% to -3.2%)    |
| 25 | Kazakhstan | Other unintentional injuries                    | 21 (13 to 33)    | 20 (13 to 33)    | -1.5% (-7.1% to 3.1%)     |
| 26 | Kazakhstan | Pedestrian road injuries                        | 35 (27 to 45)    | 26 (20 to 33)    | -25.3% (-34.3% to -15.4%) |
| 27 | Kazakhstan | Physical violence by firearm                    | 0 (0 to 0)       | 0 (0 to 0)       | 16.7% (-3.1% to 38%)      |
| 28 | Kazakhstan | Physical violence by other means                | 32 (23 to 44)    | 21 (15 to 29)    | -33.6% (-41.3% to -25.4%) |
| 29 | Kazakhstan | Physical violence by sharp object               | 5 (3 to 8)       | 3 (2 to 5)       | -36.5% (-47.1% to -24.8%) |
| 30 | Kazakhstan | Poisoning by carbon monoxide                    | 0 (0 to 0)       | 0 (0 to 0)       | 22.8% (6.3% to 40.2%)     |
| 31 | Kazakhstan | Poisoning by other means                        | 1 (0 to 1)       | 0 (0 to 1)       | -34.4% (-42.2% to -26.2%) |
| 32 | Kazakhstan | Pulmonary aspiration and foreign body in airway | 1 (1 to 3)       | 1 (1 to 2)       | -29% (-36.5% to -21.6%)   |
| 33 | Kazakhstan | Self-harm by firearm                            | 1 (0 to 1)       | 1 (0 to 1)       | -0.9% (-19.5% to 17.3%)   |
| 34 | Kazakhstan | Self-harm by other specified means              | 5 (3 to 7)       | 5 (4 to 8)       | 15.7% (9.2% to 22.6%)     |
| 35 | Kazakhstan | Unintentional firearm injuries                  | 1 (1 to 2)       | 1 (0 to 1)       | -23.2% (-35.6% to -10.5%) |
| 36 | Kazakhstan | Venomous animal contact                         | 2 (1 to 5)       | 2 (1 to 4)       | -14.9% (-19.8% to -9.5%)  |
| 37 | Kenya      | Adverse effects of medical treatment            | 0 (0 to 0)       | 0 (0 to 0)       | 0% (0% to 0%)             |
| 38 | Kenya      | Conflict and terrorism                          | 0 (0 to 0)       | 1 (0 to 2)       | NA                        |
| 39 | Kenya      | Cyclist road injuries                           | 33 (24 to 46)    | 36 (26 to 50)    | 7.7% (5.5% to 10%)        |
| 40 | Kenya      | Drowning                                        | 0 (0 to 0)       | 0 (0 to 0)       | -19.5% (-23.1% to -15.8%) |
| 41 | Kenya      | Environmental heat and cold exposure            | 3 (2 to 4)       | 3 (2 to 4)       | 0.7% (-1.7% to 2.7%)      |
| 42 | Kenya      | Executions and police conflict                  | 0 (0 to 0)       | 0 (0 to 0)       | NA                        |
| 43 | Kenya      | Exposure to forces of nature                    | 1 (1 to 2)       | 0 (0 to 0)       | NA                        |
| 44 | Kenya      | Falls                                           | 51 (40 to 65)    | 54 (42 to 70)    | 7.1% (6% to 8.3%)         |
| 45 |            |                                                 |                  |                  |                           |
| 46 |            |                                                 |                  |                  |                           |

|    |          |                                                 |               |               |                           |
|----|----------|-------------------------------------------------|---------------|---------------|---------------------------|
| 1  |          |                                                 |               |               |                           |
| 2  | Kenya    | Fire, heat, and hot substances                  | 2 (1 to 3)    | 2 (1 to 3)    | -8.5% (-10.2% to -6.9%)   |
| 3  | Kenya    | Foreign body in eyes                            | 0 (0 to 0)    | 0 (0 to 0)    | -0.4% (-1.2% to 0%)       |
| 4  | Kenya    | Foreign body in other body part                 | 4 (2 to 7)    | 4 (2 to 7)    | -0.5% (-2.2% to 1.4%)     |
| 5  | Kenya    | Motor vehicle road injuries                     | 30 (21 to 40) | 31 (23 to 42) | 5.9% (4.1% to 7.7%)       |
| 6  | Kenya    | Motorcyclist road injuries                      | 9 (6 to 12)   | 10 (7 to 13)  | 9% (6.6% to 11.2%)        |
| 7  | Kenya    | Non-venomous animal contact                     | 9 (5 to 15)   | 8 (5 to 14)   | -6.2% (-7.6% to -4.5%)    |
| 8  | Kenya    | Other exposure to mechanical forces             | 21 (12 to 34) | 20 (12 to 33) | -3.6% (-6.2% to -0.7%)    |
| 9  | Kenya    | Other road injuries                             | 1 (1 to 2)    | 1 (1 to 2)    | -0.5% (-3% to 2.1%)       |
| 10 | Kenya    | Other transport injuries                        | 6 (4 to 8)    | 6 (4 to 8)    | -3.2% (-4.7% to -1.8%)    |
| 11 | Kenya    | Other unintentional injuries                    | 9 (6 to 14)   | 8 (5 to 14)   | -7.2% (-12.2% to -2.5%)   |
| 12 | Kenya    | Pedestrian road injuries                        | 55 (42 to 69) | 53 (40 to 66) | -3.6% (-5.1% to -2%)      |
| 13 | Kenya    | Physical violence by firearm                    | 0 (0 to 0)    | 0 (0 to 1)    | 10.5% (8.3% to 12.8%)     |
| 14 | Kenya    | Physical violence by other means                | 11 (8 to 16)  | 12 (8 to 17)  | 6.9% (5.2% to 8.3%)       |
| 15 | Kenya    | Physical violence by sharp object               | 3 (2 to 5)    | 3 (2 to 5)    | 7% (5% to 9%)             |
| 16 | Kenya    | Poisoning by carbon monoxide                    | 0 (0 to 0)    | 0 (0 to 0)    | 8.8% (5.3% to 13.1%)      |
| 17 | Kenya    | Poisoning by other means                        | 0 (0 to 0)    | 0 (0 to 0)    | -8.6% (-11.1% to -6.5%)   |
| 18 | Kenya    | Pulmonary aspiration and foreign body in airway | 0 (0 to 1)    | 0 (0 to 1)    | -11.1% (-13.2% to -9%)    |
| 19 | Kenya    | Self-harm by firearm                            | 0 (0 to 0)    | 0 (0 to 0)    | 24.2% (17.7% to 32.1%)    |
| 20 | Kenya    | Self-harm by other specified means              | 1 (1 to 2)    | 1 (1 to 2)    | -0.5% (-2.9% to 2%)       |
| 21 | Kenya    | Unintentional firearm injuries                  | 2 (1 to 3)    | 2 (1 to 3)    | -13.4% (-18.7% to -8%)    |
| 22 | Kiribati | Adverse effects of medical treatment            | 0 (0 to 0)    | 0 (0 to 0)    | 0% (0% to 0%)             |
| 23 | Kiribati | Conflict and terrorism                          | 0 (0 to 0)    | 0 (0 to 0)    | NA                        |
| 24 | Kiribati | Cyclist road injuries                           | 10 (7 to 14)  | 10 (6 to 14)  | -2.1% (-10.9% to 6.7%)    |
| 25 | Kiribati | Drowning                                        | 0 (0 to 1)    | 0 (0 to 1)    | -15% (-21.9% to -7.4%)    |
| 26 | Kiribati | Environmental heat and cold exposure            | 2 (1 to 3)    | 2 (2 to 4)    | 12.3% (6% to 19.2%)       |
| 27 | Kiribati | Executions and police conflict                  | 0 (0 to 0)    | 0 (0 to 0)    | NA                        |
| 28 | Kiribati | Exposure to forces of nature                    | 0 (0 to 0)    | 0 (0 to 0)    | NA                        |
| 29 | Kiribati | Falls                                           | 30 (23 to 40) | 42 (32 to 56) | 38% (32.6% to 44.1%)      |
| 30 | Kiribati | Fire, heat, and hot substances                  | 1 (1 to 2)    | 1 (1 to 2)    | 5.3% (-0.6% to 13.3%)     |
| 31 | Kiribati | Foreign body in eyes                            | 0 (0 to 0)    | 0 (0 to 0)    | -0.8% (-1.3% to -0.4%)    |
| 32 | Kiribati | Foreign body in other body part                 | 1 (0 to 1)    | 1 (0 to 1)    | -1% (-5% to 4.2%)         |
| 33 | Kiribati | Motor vehicle road injuries                     | 19 (15 to 25) | 16 (12 to 22) | -15.4% (-23.4% to -6.9%)  |
| 34 | Kiribati | Motorcyclist road injuries                      | 14 (11 to 19) | 22 (17 to 29) | 57.3% (40% to 76.7%)      |
| 35 | Kiribati | Non-venomous animal contact                     | 5 (3 to 9)    | 5 (3 to 8)    | -1.8% (-6.5% to 2.4%)     |
| 36 | Kiribati | Other exposure to mechanical forces             | 10 (6 to 17)  | 9 (5 to 16)   | -8.8% (-14.9% to -2.7%)   |
| 37 | Kiribati | Other road injuries                             | 1 (1 to 2)    | 1 (1 to 2)    | -4.5% (-15.4% to 7.9%)    |
| 38 | Kiribati | Other transport injuries                        | 6 (5 to 8)    | 6 (4 to 7)    | -12.9% (-19.9% to -6.6%)  |
| 39 | Kiribati | Other unintentional injuries                    | 5 (3 to 8)    | 4 (3 to 7)    | -6% (-11.4% to -0.1%)     |
| 40 | Kiribati | Pedestrian road injuries                        | 8 (6 to 11)   | 5 (4 to 7)    | -34.4% (-42.6% to -25%)   |
| 41 | Kiribati | Physical violence by firearm                    | 0 (0 to 0)    | 0 (0 to 0)    | -4.7% (-15.5% to 6.8%)    |
| 42 | Kiribati | Physical violence by other means                | 25 (18 to 35) | 19 (13 to 26) | -24.8% (-30.3% to -19.2%) |
| 43 | Kiribati | Physical violence by sharp object               | 2 (1 to 4)    | 2 (1 to 3)    | -21.9% (-29.9% to -12.9%) |
| 44 |          |                                                 |               |               |                           |
| 45 |          |                                                 |               |               |                           |
| 46 |          |                                                 |               |               |                           |

|    |            |                                                 |                  |                 |                           |
|----|------------|-------------------------------------------------|------------------|-----------------|---------------------------|
| 1  |            |                                                 |                  |                 |                           |
| 2  | Kiribati   | Poisoning by carbon monoxide                    | 0 (0 to 0)       | 0 (0 to 0)      | 21% (6.9% to 37.8%)       |
| 3  | Kiribati   | Poisoning by other means                        | 0 (0 to 0)       | 0 (0 to 0)      | -19.6% (-27% to -11.3%)   |
| 4  | Kiribati   | Pulmonary aspiration and foreign body in airway | 0 (0 to 0)       | 0 (0 to 0)      | -1.7% (-12.7% to 8.9%)    |
| 5  | Kiribati   | Self-harm by firearm                            | 1 (0 to 1)       | 1 (0 to 1)      | -5% (-23.5% to 17.5%)     |
| 6  | Kiribati   | Self-harm by other specified means              | 4 (3 to 6)       | 3 (2 to 5)      | -15.1% (-21.5% to -8%)    |
| 7  | Kiribati   | Unintentional firearm injuries                  | 1 (1 to 2)       | 1 (1 to 2)      | 5.7% (-2.9% to 14.2%)     |
| 8  | Kiribati   | Venomous animal contact                         | 3 (1 to 6)       | 3 (1 to 6)      | 2.5% (-3.2% to 9%)        |
| 9  | Kuwait     | Adverse effects of medical treatment            | 0 (0 to 0)       | 0 (0 to 0)      | 0% (0% to 0%)             |
| 10 | Kuwait     | Conflict and terrorism                          | 366 (149 to 827) | 0 (0 to 0)      | NA                        |
| 11 | Kuwait     | Cyclist road injuries                           | 23 (16 to 31)    | 18 (12 to 24)   | -22.4% (-30.5% to -13.7%) |
| 12 | Kuwait     | Drowning                                        | 0 (0 to 0)       | 0 (0 to 1)      | 87.6% (61.2% to 127.6%)   |
| 13 | Kuwait     | Environmental heat and cold exposure            | 3 (2 to 4)       | 3 (2 to 4)      | 2.9% (-2.2% to 8.8%)      |
| 14 | Kuwait     | Executions and police conflict                  | 0 (0 to 0)       | 0 (0 to 0)      | NA                        |
| 15 | Kuwait     | Exposure to forces of nature                    | 0 (0 to 0)       | 0 (0 to 0)      | NA                        |
| 16 | Kuwait     | Falls                                           | 96 (73 to 128)   | 111 (83 to 147) | 14.9% (10% to 20%)        |
| 17 | Kuwait     | Fire, heat, and hot substances                  | 1 (0 to 1)       | 1 (0 to 1)      | 2.7% (-2.6% to 7.9%)      |
| 18 | Kuwait     | Foreign body in eyes                            | 0 (0 to 0)       | 0 (0 to 0)      | -2.4% (-4.6% to -0.9%)    |
| 19 | Kuwait     | Foreign body in other body part                 | 1 (1 to 3)       | 1 (1 to 3)      | -0.7% (-4.9% to 5.3%)     |
| 20 | Kuwait     | Motor vehicle road injuries                     | 57 (45 to 71)    | 40 (32 to 51)   | -28.8% (-36.3% to -21.2%) |
| 21 | Kuwait     | Motorcyclist road injuries                      | 10 (8 to 14)     | 9 (7 to 12)     | -13.9% (-24.9% to -2.1%)  |
| 22 | Kuwait     | Non-venomous animal contact                     | 2 (1 to 4)       | 2 (1 to 4)      | 1.4% (-3.1% to 6%)        |
| 23 | Kuwait     | Other exposure to mechanical forces             | 24 (15 to 39)    | 25 (15 to 42)   | 3.5% (-4.2% to 11.1%)     |
| 24 | Kuwait     | Other road injuries                             | 3 (1 to 4)       | 2 (1 to 4)      | -14.7% (-25.3% to -2%)    |
| 25 | Kuwait     | Other transport injuries                        | 8 (6 to 10)      | 6 (5 to 8)      | -19.5% (-26.1% to -13.1%) |
| 26 | Kuwait     | Other unintentional injuries                    | 18 (11 to 30)    | 19 (12 to 32)   | 4.8% (-2.4% to 11.5%)     |
| 27 | Kuwait     | Pedestrian road injuries                        | 34 (27 to 42)    | 21 (17 to 27)   | -36.9% (-43.9% to -30.3%) |
| 28 | Kuwait     | Physical violence by firearm                    | 0 (0 to 1)       | 1 (0 to 1)      | 59.4% (39.5% to 84.4%)    |
| 29 | Kuwait     | Physical violence by other means                | 16 (11 to 22)    | 13 (9 to 18)    | -19.2% (-25.7% to -11.8%) |
| 30 | Kuwait     | Physical violence by sharp object               | 2 (1 to 3)       | 2 (1 to 3)      | -27.1% (-35.8% to -18.9%) |
| 31 | Kuwait     | Poisoning by carbon monoxide                    | 0 (0 to 0)       | 0 (0 to 0)      | 11.3% (-0.2% to 25%)      |
| 32 | Kuwait     | Poisoning by other means                        | 0 (0 to 0)       | 0 (0 to 0)      | -11% (-18.3% to -0.8%)    |
| 33 | Kuwait     | Pulmonary aspiration and foreign body in airway | 0 (0 to 1)       | 0 (0 to 1)      | -13.5% (-22.6% to -4.9%)  |
| 34 | Kuwait     | Self-harm by firearm                            | 0 (0 to 0)       | 0 (0 to 0)      | 21.2% (9.1% to 34.7%)     |
| 35 | Kuwait     | Self-harm by other specified means              | 1 (0 to 1)       | 1 (1 to 1)      | 13.3% (6.5% to 20.2%)     |
| 36 | Kuwait     | Unintentional firearm injuries                  | 2 (1 to 3)       | 2 (1 to 3)      | 10.2% (-0.9% to 21.8%)    |
| 37 | Kuwait     | Venomous animal contact                         | 1 (1 to 3)       | 1 (1 to 3)      | 2.3% (-3.7% to 7.8%)      |
| 38 | Kyrgyzstan | Adverse effects of medical treatment            | 0 (0 to 0)       | 0 (0 to 0)      | 0% (0% to 0%)             |
| 39 | Kyrgyzstan | Conflict and terrorism                          | 0 (0 to 0)       | 0 (0 to 0)      | NA                        |
| 40 | Kyrgyzstan | Cyclist road injuries                           | 21 (14 to 30)    | 20 (14 to 28)   | -5.7% (-14.9% to 3.8%)    |
| 41 | Kyrgyzstan | Drowning                                        | 1 (0 to 1)       | 1 (0 to 1)      | -14.2% (-25.1% to -3.3%)  |
| 42 | Kyrgyzstan | Environmental heat and cold exposure            | 4 (3 to 6)       | 4 (3 to 6)      | 5.9% (-4.6% to 16.6%)     |
| 43 | Kyrgyzstan | Executions and police conflict                  | 0 (0 to 0)       | 0 (0 to 0)      | NA                        |
| 44 | Kyrgyzstan | Exposure to forces of nature                    | 0 (0 to 0)       | 0 (0 to 0)      | NA                        |
| 45 |            |                                                 |                  |                 |                           |
| 46 |            |                                                 |                  |                 |                           |

|    |                                  |                                                 |                  |                 |                           |
|----|----------------------------------|-------------------------------------------------|------------------|-----------------|---------------------------|
| 1  |                                  |                                                 |                  |                 |                           |
| 2  | Kyrgyzstan                       | Falls                                           | 162 (125 to 210) | 112 (84 to 151) | -30.6% (-35.9% to -24.4%) |
| 3  | Kyrgyzstan                       | Fire, heat, and hot substances                  | 4 (3 to 7)       | 3 (2 to 5)      | -27.1% (-36.9% to -17.3%) |
| 4  | Kyrgyzstan                       | Foreign body in eyes                            | 0 (0 to 0)       | 0 (0 to 0)      | 1.1% (0.6% to 1.9%)       |
| 5  | Kyrgyzstan                       | Foreign body in other body part                 | 2 (1 to 4)       | 2 (1 to 4)      | 1.2% (-4.6% to 6.8%)      |
| 6  | Kyrgyzstan                       | Motor vehicle road injuries                     | 71 (55 to 88)    | 66 (51 to 82)   | -7% (-16.4% to 3.2%)      |
| 7  | Kyrgyzstan                       | Motorcyclist road injuries                      | 9 (7 to 12)      | 6 (4 to 7)      | -38.3% (-47.9% to -27.9%) |
| 8  | Kyrgyzstan                       | Non-venomous animal contact                     | 3 (2 to 5)       | 3 (2 to 5)      | 8.9% (3.2% to 15.4%)      |
| 9  | Kyrgyzstan                       | Other exposure to mechanical forces             | 49 (30 to 77)    | 48 (29 to 76)   | -1.7% (-7.2% to 3.1%)     |
| 10 | Kyrgyzstan                       | Other road injuries                             | 3 (2 to 5)       | 2 (1 to 4)      | -25.7% (-35.3% to -15.3%) |
| 11 | Kyrgyzstan                       | Other transport injuries                        | 5 (3 to 6)       | 5 (3 to 6)      | -2.4% (-7.7% to 3.2%)     |
| 12 | Kyrgyzstan                       | Other unintentional injuries                    | 25 (16 to 40)    | 20 (12 to 32)   | -22% (-28.9% to -15.3%)   |
| 13 | Kyrgyzstan                       | Pedestrian road injuries                        | 31 (24 to 39)    | 27 (21 to 35)   | -11.3% (-21.5% to 0%)     |
| 14 | Kyrgyzstan                       | Physical violence by firearm                    | 0 (0 to 0)       | 0 (0 to 0)      | -11.2% (-29.2% to 6.5%)   |
| 15 | Kyrgyzstan                       | Physical violence by other means                | 29 (21 to 40)    | 14 (10 to 21)   | -49.5% (-55.3% to -42.9%) |
| 16 | Kyrgyzstan                       | Physical violence by sharp object               | 5 (3 to 8)       | 2 (1 to 4)      | -52.3% (-61.2% to -43.3%) |
| 17 | Kyrgyzstan                       | Poisoning by carbon monoxide                    | 0 (0 to 0)       | 0 (0 to 0)      | -19.3% (-34.8% to -2.1%)  |
| 18 | Kyrgyzstan                       | Poisoning by other means                        | 0 (0 to 1)       | 0 (0 to 1)      | -19.7% (-30.3% to -8.5%)  |
| 19 | Kyrgyzstan                       | Pulmonary aspiration and foreign body in airway | 1 (1 to 2)       | 1 (1 to 2)      | -16.2% (-24.4% to -7.7%)  |
| 20 | Kyrgyzstan                       | Self-harm by firearm                            | 0 (0 to 1)       | 0 (0 to 0)      | -26% (-39.6% to -10.7%)   |
| 21 | Kyrgyzstan                       | Self-harm by other specified means              | 3 (2 to 4)       | 2 (2 to 4)      | -19.4% (-24.2% to -15%)   |
| 22 | Kyrgyzstan                       | Unintentional firearm injuries                  | 1 (0 to 2)       | 1 (0 to 1)      | -5.1% (-13.5% to 3.7%)    |
| 23 | Kyrgyzstan                       | Venomous animal contact                         | 3 (1 to 5)       | 3 (1 to 6)      | 3.8% (-2.4% to 9.5%)      |
| 24 | Lao People's Democratic Republic | Adverse effects of medical treatment            | 0 (0 to 0)       | 0 (0 to 0)      | 0% (0% to 0%)             |
| 25 | Lao People's Democratic Republic | Conflict and terrorism                          | 38 (10 to 107)   | 0 (0 to 0)      | NA                        |
| 26 | Lao People's Democratic Republic | Cyclist road injuries                           | 20 (14 to 29)    | 18 (13 to 26)   | -9.9% (-18.2% to -1.3%)   |
| 27 | Lao People's Democratic Republic | Drowning                                        | 1 (0 to 1)       | 0 (0 to 1)      | -46.7% (-49.9% to -41.9%) |
| 28 | Lao People's Democratic Republic | Environmental heat and cold exposure            | 1 (1 to 2)       | 1 (1 to 2)      | -6.7% (-12.4% to -0.6%)   |
| 29 | Lao People's Democratic Republic | Executions and police conflict                  | 0 (0 to 0)       | 0 (0 to 0)      | NA                        |
| 30 | Lao People's Democratic Republic | Exposure to forces of nature                    | 0 (0 to 0)       | 0 (0 to 0)      | NA                        |
| 31 | Lao People's Democratic Republic | Falls                                           | 45 (35 to 58)    | 60 (48 to 77)   | 34.5% (29.2% to 40.4%)    |
| 32 | Lao People's Democratic Republic | Fire, heat, and hot substances                  | 2 (1 to 3)       | 1 (1 to 2)      | -35.1% (-41.5% to -29.3%) |
| 33 | Lao People's Democratic Republic | Foreign body in eyes                            | 0 (0 to 0)       | 0 (0 to 0)      | 1.8% (1.2% to 2.6%)       |
| 34 | Lao People's Democratic Republic | Foreign body in other body part                 | 1 (0 to 2)       | 1 (0 to 2)      | -5.8% (-11.3% to -0.1%)   |
| 35 | Lao People's Democratic Republic | Motor vehicle road injuries                     | 28 (20 to 37)    | 24 (18 to 32)   | -12.5% (-20.1% to -4.4%)  |
| 36 | Lao People's Democratic Republic | Motorcyclist road injuries                      | 45 (36 to 57)    | 46 (37 to 58)   | 2.3% (-6.4% to 11.2%)     |
| 37 | Lao People's Democratic Republic | Non-venomous animal contact                     | 7 (4 to 12)      | 4 (3 to 7)      | -37.8% (-41.8% to -33.7%) |
| 38 | Lao People's Democratic Republic | Other exposure to mechanical forces             | 18 (11 to 30)    | 16 (9 to 25)    | -14.6% (-21.5% to -8.6%)  |
| 39 | Lao People's Democratic Republic | Other road injuries                             | 1 (1 to 2)       | 1 (1 to 2)      | 0.5% (-9.7% to 11.1%)     |
| 40 | Lao People's Democratic Republic | Other transport injuries                        | 6 (5 to 8)       | 4 (3 to 6)      | -26.3% (-32.2% to -19.9%) |
| 41 | Lao People's Democratic Republic | Other unintentional injuries                    | 10 (7 to 16)     | 9 (6 to 14)     | -15.2% (-20.8% to -9.1%)  |
| 42 | Lao People's Democratic Republic | Pedestrian road injuries                        | 21 (16 to 27)    | 15 (11 to 19)   | -28.6% (-33.9% to -22.8%) |
| 43 | Lao People's Democratic Republic | Physical violence by firearm                    | 0 (0 to 1)       | 0 (0 to 0)      | -24.4% (-31.7% to -15.6%) |
| 44 | Lao People's Democratic Republic | Physical violence by other means                | 34 (24 to 49)    | 26 (18 to 37)   | -24.1% (-29.1% to -18.8%) |
| 45 |                                  |                                                 |                  |                 |                           |
| 46 |                                  |                                                 |                  |                 |                           |

|    |                                  |                                                 |                  |                  |                           |
|----|----------------------------------|-------------------------------------------------|------------------|------------------|---------------------------|
| 1  |                                  |                                                 |                  |                  |                           |
| 2  | Lao People's Democratic Republic | Physical violence by sharp object               | 7 (4 to 11)      | 6 (4 to 9)       | -20.5% (-28.7% to -11.5%) |
| 3  | Lao People's Democratic Republic | Poisoning by carbon monoxide                    | 0 (0 to 0)       | 0 (0 to 0)       | 16.6% (-2.7% to 38.6%)    |
| 4  | Lao People's Democratic Republic | Poisoning by other means                        | 0 (0 to 0)       | 0 (0 to 0)       | -28.3% (-37.2% to -19.1%) |
| 5  | Lao People's Democratic Republic | Pulmonary aspiration and foreign body in airway | 0 (0 to 0)       | 0 (0 to 0)       | -39.6% (-47.6% to -32.1%) |
| 6  | Lao People's Democratic Republic | Self-harm by firearm                            | 0 (0 to 0)       | 0 (0 to 0)       | -12.4% (-28.4% to 7%)     |
| 7  | Lao People's Democratic Republic | Self-harm by other specified means              | 2 (1 to 3)       | 1 (1 to 2)       | -28% (-32.2% to -23.7%)   |
| 8  | Lao People's Democratic Republic | Unintentional firearm injuries                  | 2 (1 to 3)       | 2 (1 to 3)       | -17.4% (-26.9% to -8.4%)  |
| 9  | Lao People's Democratic Republic | Venomous animal contact                         | 2 (0 to 3)       | 1 (0 to 2)       | -33.9% (-41.4% to -27.3%) |
| 10 | Latvia                           | Adverse effects of medical treatment            | 0 (0 to 0)       | 0 (0 to 0)       | 0% (0% to 0%)             |
| 11 | Latvia                           | Conflict and terrorism                          | 0 (0 to 0)       | 0 (0 to 0)       | NA                        |
| 12 | Latvia                           | Cyclist road injuries                           | 78 (56 to 106)   | 46 (33 to 62)    | -41.3% (-49.7% to -31.8%) |
| 13 | Latvia                           | Drowning                                        | 1 (1 to 2)       | 1 (1 to 2)       | -17% (-25.5% to -8.3%)    |
| 14 | Latvia                           | Environmental heat and cold exposure            | 10 (7 to 14)     | 11 (8 to 15)     | 15.6% (5% to 28.7%)       |
| 15 | Latvia                           | Executions and police conflict                  | 0 (0 to 0)       | 0 (0 to 0)       | NA                        |
| 16 | Latvia                           | Exposure to forces of nature                    | 0 (0 to 0)       | 0 (0 to 0)       | NA                        |
| 17 | Latvia                           | Falls                                           | 407 (322 to 516) | 266 (208 to 341) | -34.6% (-38.4% to -30.9%) |
| 18 | Latvia                           | Fire, heat, and hot substances                  | 7 (4 to 11)      | 4 (3 to 7)       | -40% (-45.5% to -33.8%)   |
| 19 | Latvia                           | Foreign body in eyes                            | 0 (0 to 0)       | 0 (0 to 0)       | 1.1% (0.6% to 1.9%)       |
| 20 | Latvia                           | Foreign body in other body part                 | 2 (1 to 4)       | 2 (1 to 4)       | 2.2% (-3.6% to 8.5%)      |
| 21 | Latvia                           | Motor vehicle road injuries                     | 199 (156 to 248) | 98 (76 to 123)   | -50.6% (-57.9% to -41.7%) |
| 22 | Latvia                           | Motorcyclist road injuries                      | 24 (18 to 31)    | 12 (9 to 16)     | -48.8% (-58.7% to -37.6%) |
| 23 | Latvia                           | Non-venomous animal contact                     | 4 (2 to 7)       | 4 (2 to 6)       | -9.4% (-15.1% to -4.2%)   |
| 24 | Latvia                           | Other exposure to mechanical forces             | 109 (69 to 170)  | 84 (52 to 131)   | -23.3% (-31.3% to -14.6%) |
| 25 | Latvia                           | Other road injuries                             | 2 (1 to 4)       | 2 (1 to 3)       | -15.1% (-26.9% to -1.5%)  |
| 26 | Latvia                           | Other transport injuries                        | 10 (8 to 13)     | 6 (5 to 8)       | -39.1% (-46% to -32.4%)   |
| 27 | Latvia                           | Other unintentional injuries                    | 27 (17 to 44)    | 24 (15 to 40)    | -10.5% (-18.5% to -2.7%)  |
| 28 | Latvia                           | Pedestrian road injuries                        | 97 (75 to 122)   | 36 (27 to 46)    | -63% (-68.4% to -57.4%)   |
| 29 | Latvia                           | Physical violence by firearm                    | 0 (0 to 1)       | 0 (0 to 1)       | -17.5% (-36.6% to 5.1%)   |
| 30 | Latvia                           | Physical violence by other means                | 44 (32 to 61)    | 28 (20 to 39)    | -37.1% (-43.6% to -30.1%) |
| 31 | Latvia                           | Physical violence by sharp object               | 6 (4 to 9)       | 3 (2 to 5)       | -45.7% (-54.8% to -36.3%) |
| 32 | Latvia                           | Poisoning by carbon monoxide                    | 0 (0 to 0)       | 0 (0 to 0)       | -3.3% (-21.1% to 14.7%)   |
| 33 | Latvia                           | Poisoning by other means                        | 0 (0 to 1)       | 0 (0 to 1)       | 2.2% (-11.8% to 15.4%)    |
| 34 | Latvia                           | Pulmonary aspiration and foreign body in airway | 1 (1 to 2)       | 1 (0 to 1)       | -21.9% (-28.8% to -14.3%) |
| 35 | Latvia                           | Self-harm by firearm                            | 2 (1 to 3)       | 1 (1 to 2)       | -40.8% (-48.9% to -31.9%) |
| 36 | Latvia                           | Self-harm by other specified means              | 5 (3 to 8)       | 4 (2 to 6)       | -31.9% (-36.4% to -26.7%) |
| 37 | Latvia                           | Unintentional firearm injuries                  | 1 (1 to 2)       | 1 (1 to 2)       | -1.6% (-15.6% to 13.6%)   |
| 38 | Latvia                           | Venomous animal contact                         | 3 (1 to 6)       | 3 (1 to 5)       | -8.5% (-14.6% to -2.5%)   |
| 39 | Lebanon                          | Adverse effects of medical treatment            | 0 (0 to 0)       | 0 (0 to 0)       | 0% (0% to 0%)             |
| 40 | Lebanon                          | Conflict and terrorism                          | 136 (51 to 324)  | 1 (0 to 2)       | NA                        |
| 41 | Lebanon                          | Cyclist road injuries                           | 12 (8 to 17)     | 12 (8 to 17)     | 0% (-7.7% to 9.5%)        |
| 42 | Lebanon                          | Drowning                                        | 0 (0 to 0)       | 0 (0 to 1)       | 115.2% (89.4% to 143.2%)  |
| 43 | Lebanon                          | Environmental heat and cold exposure            | 3 (2 to 4)       | 3 (2 to 4)       | 3.6% (-1.9% to 7.7%)      |
| 44 | Lebanon                          | Executions and police conflict                  | 0 (0 to 0)       | 0 (0 to 0)       | NA                        |
| 45 |                                  |                                                 |                  |                  |                           |
| 46 |                                  |                                                 |                  |                  |                           |

|    |         |                                                 |                |                |                           |
|----|---------|-------------------------------------------------|----------------|----------------|---------------------------|
| 1  |         |                                                 |                |                |                           |
| 2  | Lebanon | Exposure to forces of nature                    | 0 (0 to 0)     | 0 (0 to 0)     | NA                        |
| 3  | Lebanon | Falls                                           | 64 (49 to 86)  | 98 (75 to 132) | 53.7% (47.8% to 59.8%)    |
| 4  | Lebanon | Fire, heat, and hot substances                  | 1 (1 to 2)     | 1 (0 to 1)     | -23.7% (-30.2% to -17%)   |
| 5  | Lebanon | Foreign body in eyes                            | 0 (0 to 0)     | 0 (0 to 0)     | -0.7% (-1.6% to -0.2%)    |
| 6  | Lebanon | Foreign body in other body part                 | 1 (1 to 3)     | 1 (1 to 3)     | -0.8% (-5.8% to 4.6%)     |
| 7  | Lebanon | Motor vehicle road injuries                     | 27 (21 to 35)  | 21 (16 to 27)  | -21.6% (-27.7% to -15%)   |
| 8  | Lebanon | Motorcyclist road injuries                      | 8 (6 to 11)    | 8 (6 to 10)    | -6.1% (-14.3% to 3.8%)    |
| 9  | Lebanon | Non-venomous animal contact                     | 3 (2 to 6)     | 3 (2 to 6)     | -3.4% (-8.9% to 2.1%)     |
| 10 | Lebanon | Other exposure to mechanical forces             | 27 (16 to 44)  | 24 (14 to 40)  | -10.2% (-16.1% to -5%)    |
| 11 | Lebanon | Other road injuries                             | 2 (1 to 3)     | 2 (1 to 3)     | 2.4% (-6.2% to 12.5%)     |
| 12 | Lebanon | Other transport injuries                        | 5 (4 to 7)     | 5 (4 to 8)     | 0.2% (-4.8% to 5.7%)      |
| 13 | Lebanon | Other unintentional injuries                    | 19 (12 to 31)  | 17 (11 to 29)  | -6.7% (-11.7% to -1.1%)   |
| 14 | Lebanon | Pedestrian road injuries                        | 14 (11 to 19)  | 12 (9 to 15)   | -17.8% (-24.3% to -10.7%) |
| 15 | Lebanon | Physical violence by firearm                    | 1 (1 to 2)     | 1 (1 to 2)     | 8.6% (-10.8% to 33.3%)    |
| 16 | Lebanon | Physical violence by other means                | 77 (57 to 106) | 28 (20 to 40)  | -63.8% (-69.3% to -57.2%) |
| 17 | Lebanon | Physical violence by sharp object               | 10 (7 to 16)   | 2 (2 to 4)     | -76.1% (-80.3% to -71.1%) |
| 18 | Lebanon | Poisoning by carbon monoxide                    | 0 (0 to 0)     | 0 (0 to 0)     | 29.1% (15.3% to 43.4%)    |
| 19 | Lebanon | Poisoning by other means                        | 0 (0 to 0)     | 0 (0 to 0)     | -20.5% (-28.8% to -13.3%) |
| 20 | Lebanon | Pulmonary aspiration and foreign body in airway | 0 (0 to 1)     | 0 (0 to 1)     | -14.4% (-22.4% to -5.6%)  |
| 21 | Lebanon | Self-harm by firearm                            | 0 (0 to 0)     | 0 (0 to 0)     | 42.5% (28.5% to 58.9%)    |
| 22 | Lebanon | Self-harm by other specified means              | 1 (1 to 2)     | 1 (1 to 2)     | 14.9% (9.1% to 22%)       |
| 23 | Lebanon | Unintentional firearm injuries                  | 2 (1 to 3)     | 2 (1 to 3)     | -1.3% (-9.3% to 6.9%)     |
| 24 | Lebanon | Venomous animal contact                         | 2 (1 to 4)     | 2 (1 to 4)     | 0.1% (-5.8% to 6.9%)      |
| 25 | Lesotho | Adverse effects of medical treatment            | 0 (0 to 0)     | 0 (0 to 0)     | 0% (0% to 0%)             |
| 26 | Lesotho | Conflict and terrorism                          | 0 (0 to 0)     | 0 (0 to 0)     | NA                        |
| 27 | Lesotho | Cyclist road injuries                           | 9 (5 to 14)    | 13 (8 to 20)   | 48.8% (36.5% to 63.1%)    |
| 28 | Lesotho | Drowning                                        | 0 (0 to 0)     | 0 (0 to 0)     | 1.2% (-8.3% to 10.3%)     |
| 29 | Lesotho | Environmental heat and cold exposure            | 0 (0 to 1)     | 0 (0 to 1)     | 5% (-0.9% to 11%)         |
| 30 | Lesotho | Executions and police conflict                  | 0 (0 to 0)     | 0 (0 to 0)     | NA                        |
| 31 | Lesotho | Exposure to forces of nature                    | 5 (3 to 9)     | 0 (0 to 0)     | NA                        |
| 32 | Lesotho | Falls                                           | 20 (13 to 31)  | 24 (15 to 37)  | 19.9% (15% to 25.8%)      |
| 33 | Lesotho | Fire, heat, and hot substances                  | 0 (0 to 0)     | 0 (0 to 0)     | 21.5% (12.9% to 31.7%)    |
| 34 | Lesotho | Foreign body in eyes                            | 0 (0 to 0)     | 0 (0 to 0)     | -0.3% (-0.8% to 0.3%)     |
| 35 | Lesotho | Foreign body in other body part                 | 4 (2 to 9)     | 4 (2 to 8)     | -5.8% (-11.4% to -0.7%)   |
| 36 | Lesotho | Motor vehicle road injuries                     | 23 (15 to 33)  | 37 (25 to 53)  | 63.7% (50.4% to 78.2%)    |
| 37 | Lesotho | Motorcyclist road injuries                      | 6 (4 to 9)     | 12 (8 to 17)   | 91.8% (71.6% to 116.8%)   |
| 38 | Lesotho | Non-venomous animal contact                     | 4 (2 to 8)     | 4 (2 to 8)     | -4.7% (-9.8% to 1.1%)     |
| 39 | Lesotho | Other exposure to mechanical forces             | 28 (14 to 50)  | 28 (14 to 50)  | -0.3% (-5.9% to 5.3%)     |
| 40 | Lesotho | Other road injuries                             | 1 (1 to 2)     | 1 (1 to 3)     | 29.7% (18.7% to 41.4%)    |
| 41 | Lesotho | Other transport injuries                        | 4 (3 to 6)     | 4 (3 to 6)     | 2.4% (-3.7% to 9.5%)      |
| 42 | Lesotho | Other unintentional injuries                    | 3 (1 to 5)     | 2 (1 to 4)     | -4% (-9.4% to 2%)         |
| 43 | Lesotho | Pedestrian road injuries                        | 33 (25 to 43)  | 50 (36 to 65)  | 49.5% (38.4% to 59.9%)    |
| 44 | Lesotho | Physical violence by firearm                    | 0 (0 to 1)     | 1 (0 to 1)     | 22.6% (10% to 34.6%)      |
| 45 |         |                                                 |                |                |                           |
| 46 |         |                                                 |                |                |                           |

|    |         |                                                 |                   |                |                           |
|----|---------|-------------------------------------------------|-------------------|----------------|---------------------------|
| 1  |         |                                                 |                   |                |                           |
| 2  | Lesotho | Physical violence by other means                | 16 (11 to 24)     | 22 (14 to 33)  | 37.3% (26.8% to 49.2%)    |
| 3  | Lesotho | Physical violence by sharp object               | 5 (3 to 9)        | 7 (4 to 12)    | 36.5% (21.8% to 51.1%)    |
| 4  | Lesotho | Poisoning by carbon monoxide                    | 0 (0 to 0)        | 0 (0 to 0)     | 5.5% (-3.8% to 15.2%)     |
| 5  | Lesotho | Poisoning by other means                        | 0 (0 to 0)        | 0 (0 to 0)     | 0.2% (-7.3% to 8.7%)      |
| 6  | Lesotho | Pulmonary aspiration and foreign body in airway | 0 (0 to 0)        | 0 (0 to 0)     | -1.6% (-9.5% to 8.4%)     |
| 7  | Lesotho | Self-harm by firearm                            | 0 (0 to 0)        | 0 (0 to 0)     | 101.4% (82.4% to 124.1%)  |
| 8  | Lesotho | Self-harm by other specified means              | 0 (0 to 0)        | 0 (0 to 1)     | 68.4% (56.4% to 82.5%)    |
| 9  | Lesotho | Unintentional firearm injuries                  | 1 (0 to 1)        | 1 (0 to 1)     | -9.8% (-17.7% to -0.8%)   |
| 10 | Liberia | Venomous animal contact                         | 0 (0 to 1)        | 0 (0 to 1)     | -14.3% (-20.6% to -7.6%)  |
| 11 | Liberia | Adverse effects of medical treatment            | 0 (0 to 0)        | 0 (0 to 0)     | 0% (0% to 0%)             |
| 12 | Liberia | Conflict and terrorism                          | 792 (244 to 1989) | 0 (0 to 0)     | NA                        |
| 13 | Liberia | Cyclist road injuries                           | 24 (15 to 35)     | 26 (17 to 38)  | 6.3% (-0.6% to 13.9%)     |
| 14 | Liberia | Drowning                                        | 0 (0 to 0)        | 0 (0 to 0)     | -14.4% (-22.2% to -6.9%)  |
| 15 | Liberia | Environmental heat and cold exposure            | 0 (0 to 1)        | 0 (0 to 1)     | 3.9% (-3.2% to 11.9%)     |
| 16 | Liberia | Executions and police conflict                  | 0 (0 to 0)        | 0 (0 to 0)     | NA                        |
| 17 | Liberia | Exposure to forces of nature                    | 0 (0 to 0)        | 0 (0 to 0)     | NA                        |
| 18 | Liberia | Falls                                           | 17 (11 to 25)     | 19 (12 to 29)  | 15.6% (10.5% to 21.1%)    |
| 19 | Liberia | Fire, heat, and hot substances                  | 0 (0 to 0)        | 0 (0 to 0)     | -8.9% (-15.6% to -2.3%)   |
| 20 | Liberia | Foreign body in eyes                            | 0 (0 to 0)        | 0 (0 to 0)     | 0.1% (-0.3% to 0.9%)      |
| 21 | Liberia | Foreign body in other body part                 | 4 (2 to 8)        | 4 (1 to 7)     | -4.5% (-9.8% to 0.8%)     |
| 22 | Liberia | Motor vehicle road injuries                     | 42 (29 to 59)     | 41 (28 to 57)  | -3.5% (-10.2% to 3.5%)    |
| 23 | Liberia | Motorcyclist road injuries                      | 20 (14 to 27)     | 19 (14 to 27)  | -0.5% (-7.6% to 7%)       |
| 24 | Liberia | Non-venomous animal contact                     | 3 (1 to 6)        | 3 (1 to 6)     | 5.9% (1.2% to 11%)        |
| 25 | Liberia | Other exposure to mechanical forces             | 24 (12 to 45)     | 22 (11 to 40)  | -10.4% (-17.1% to -4.5%)  |
| 26 | Liberia | Other road injuries                             | 2 (1 to 3)        | 2 (1 to 4)     | 8.7% (-0.3% to 18.4%)     |
| 27 | Liberia | Other transport injuries                        | 3 (2 to 4)        | 3 (2 to 4)     | 1.2% (-7.6% to 9.8%)      |
| 28 | Liberia | Other unintentional injuries                    | 3 (2 to 5)        | 2 (1 to 4)     | -14.8% (-21.5% to -8.9%)  |
| 29 | Liberia | Pedestrian road injuries                        | 44 (32 to 58)     | 42 (30 to 56)  | -5.8% (-11.8% to 0.5%)    |
| 30 | Liberia | Physical violence by firearm                    | 0 (0 to 0)        | 0 (0 to 0)     | 1.9% (-12.5% to 18.8%)    |
| 31 | Liberia | Physical violence by other means                | 6 (4 to 9)        | 4 (3 to 7)     | -26.6% (-32.6% to -20.1%) |
| 32 | Liberia | Physical violence by sharp object               | 2 (1 to 3)        | 1 (1 to 2)     | -23% (-29.4% to -15.4%)   |
| 33 | Liberia | Poisoning by carbon monoxide                    | 0 (0 to 0)        | 0 (0 to 0)     | 8.9% (-4% to 24.6%)       |
| 34 | Liberia | Poisoning by other means                        | 0 (0 to 0)        | 0 (0 to 0)     | -17.3% (-25.3% to -9.1%)  |
| 35 | Liberia | Pulmonary aspiration and foreign body in airway | 0 (0 to 0)        | 0 (0 to 0)     | -17.5% (-27.9% to -7.5%)  |
| 36 | Liberia | Self-harm by firearm                            | 0 (0 to 0)        | 0 (0 to 0)     | 13.8% (6.6% to 22%)       |
| 37 | Liberia | Self-harm by other specified means              | 0 (0 to 0)        | 0 (0 to 0)     | 10.8% (4.9% to 17.6%)     |
| 38 | Liberia | Unintentional firearm injuries                  | 1 (0 to 2)        | 1 (0 to 2)     | -18.9% (-26.5% to -10.8%) |
| 39 | Liberia | Venomous animal contact                         | 0 (0 to 1)        | 0 (0 to 1)     | 5.8% (-1.7% to 13.7%)     |
| 40 | Libya   | Adverse effects of medical treatment            | 0 (0 to 0)        | 0 (0 to 0)     | 0% (0% to 0%)             |
| 41 | Libya   | Conflict and terrorism                          | 0 (0 to 0)        | 76 (31 to 175) | NA                        |
| 42 | Libya   | Cyclist road injuries                           | 17 (11 to 25)     | 16 (11 to 23)  | -6.3% (-15.4% to 3.7%)    |
| 43 | Libya   | Drowning                                        | 0 (0 to 0)        | 0 (0 to 0)     | 16.6% (2% to 35.5%)       |
| 44 | Libya   | Environmental heat and cold exposure            | 3 (2 to 4)        | 3 (2 to 4)     | 0.4% (-4.4% to 4.8%)      |
| 45 |         |                                                 |                   |                |                           |
| 46 |         |                                                 |                   |                |                           |

|    |           |                                                 |                  |                  |                           |
|----|-----------|-------------------------------------------------|------------------|------------------|---------------------------|
| 1  |           |                                                 |                  |                  |                           |
| 2  | Libya     | Executions and police conflict                  | 0 (0 to 0)       | 2 (1 to 4)       | NA                        |
| 3  | Libya     | Exposure to forces of nature                    | 0 (0 to 0)       | 0 (0 to 0)       | NA                        |
| 4  | Libya     | Falls                                           | 81 (63 to 105)   | 95 (73 to 125)   | 18% (13.4% to 22.8%)      |
| 5  | Libya     | Fire, heat, and hot substances                  | 1 (1 to 2)       | 1 (0 to 1)       | -27.3% (-32.7% to -21.6%) |
| 6  | Libya     | Foreign body in eyes                            | 0 (0 to 0)       | 0 (0 to 0)       | -1.4% (-2.6% to -0.5%)    |
| 7  | Libya     | Foreign body in other body part                 | 1 (1 to 3)       | 1 (1 to 3)       | -0.9% (-5.1% to 4.7%)     |
| 8  | Libya     | Motor vehicle road injuries                     | 66 (52 to 83)    | 48 (38 to 61)    | -27% (-32.4% to -21.3%)   |
| 9  | Libya     | Motorcyclist road injuries                      | 12 (9 to 16)     | 10 (8 to 14)     | -11.8% (-21.3% to -1.8%)  |
| 10 | Libya     | Non-venomous animal contact                     | 3 (1 to 5)       | 3 (2 to 5)       | 18.2% (12.7% to 23.6%)    |
| 11 | Libya     | Other exposure to mechanical forces             | 29 (18 to 45)    | 24 (14 to 38)    | -16% (-21.7% to -11.1%)   |
| 12 | Libya     | Other road injuries                             | 2 (1 to 4)       | 2 (1 to 3)       | -2.7% (-12.2% to 7.9%)    |
| 13 | Libya     | Other transport injuries                        | 5 (4 to 7)       | 5 (4 to 7)       | -5.3% (-11.5% to 0.7%)    |
| 14 | Libya     | Other unintentional injuries                    | 18 (12 to 29)    | 16 (10 to 27)    | -10.2% (-15.7% to -4.4%)  |
| 15 | Libya     | Pedestrian road injuries                        | 36 (27 to 45)    | 27 (20 to 33)    | -25.2% (-31.4% to -19%)   |
| 16 | Libya     | Physical violence by firearm                    | 0 (0 to 0)       | 2 (1 to 2)       | 509.9% (398.5% to 654.9%) |
| 17 | Libya     | Physical violence by other means                | 14 (10 to 20)    | 43 (32 to 59)    | 213.6% (165.9% to 271.4%) |
| 18 | Libya     | Physical violence by sharp object               | 2 (1 to 3)       | 5 (3 to 7)       | 130.9% (93.1% to 176.2%)  |
| 19 | Libya     | Poisoning by carbon monoxide                    | 0 (0 to 0)       | 0 (0 to 0)       | 14.7% (3.3% to 26.1%)     |
| 20 | Libya     | Poisoning by other means                        | 0 (0 to 0)       | 0 (0 to 0)       | -21.6% (-27.9% to -15.2%) |
| 21 | Libya     | Pulmonary aspiration and foreign body in airway | 0 (0 to 1)       | 0 (0 to 1)       | -5.6% (-13.8% to 2.9%)    |
| 22 | Libya     | Self-harm by firearm                            | 0 (0 to 0)       | 0 (0 to 0)       | 24.7% (10.8% to 40.3%)    |
| 23 | Libya     | Self-harm by other specified means              | 1 (1 to 2)       | 1 (1 to 2)       | 12.6% (7.2% to 18.8%)     |
| 24 | Libya     | Unintentional firearm injuries                  | 2 (1 to 3)       | 1 (1 to 2)       | -9% (-17.3% to -0.1%)     |
| 25 | Libya     | Venomous animal contact                         | 2 (1 to 3)       | 2 (1 to 4)       | 18.6% (11.9% to 25.6%)    |
| 26 | Lithuania | Adverse effects of medical treatment            | 0 (0 to 0)       | 0 (0 to 0)       | 0% (0% to 0%)             |
| 27 | Lithuania | Conflict and terrorism                          | 0 (0 to 0)       | 0 (0 to 0)       | NA                        |
| 28 | Lithuania | Cyclist road injuries                           | 85 (63 to 113)   | 53 (38 to 71)    | -38.2% (-46.7% to -30%)   |
| 29 | Lithuania | Drowning                                        | 1 (1 to 2)       | 1 (0 to 1)       | -23.4% (-31.1% to -15.3%) |
| 30 | Lithuania | Environmental heat and cold exposure            | 12 (9 to 17)     | 13 (9 to 17)     | 4% (-2.8% to 13.1%)       |
| 31 | Lithuania | Executions and police conflict                  | 0 (0 to 0)       | 0 (0 to 0)       | NA                        |
| 32 | Lithuania | Exposure to forces of nature                    | 0 (0 to 0)       | 0 (0 to 0)       | NA                        |
| 33 | Lithuania | Falls                                           | 359 (283 to 459) | 305 (242 to 392) | -15% (-19.3% to -10.4%)   |
| 34 | Lithuania | Fire, heat, and hot substances                  | 5 (3 to 7)       | 3 (2 to 6)       | -25.1% (-33.3% to -16.9%) |
| 35 | Lithuania | Foreign body in eyes                            | 0 (0 to 0)       | 0 (0 to 0)       | 0.6% (0.3% to 1.1%)       |
| 36 | Lithuania | Foreign body in other body part                 | 2 (1 to 4)       | 2 (1 to 4)       | 2.2% (-3.6% to 7.6%)      |
| 37 | Lithuania | Motor vehicle road injuries                     | 178 (137 to 225) | 105 (82 to 132)  | -40.9% (-49.4% to -32.4%) |
| 38 | Lithuania | Motorcyclist road injuries                      | 15 (11 to 20)    | 13 (9 to 17)     | -17.7% (-31.4% to -5.3%)  |
| 39 | Lithuania | Non-venomous animal contact                     | 4 (2 to 7)       | 4 (2 to 7)       | -11.9% (-16.8% to -7%)    |
| 40 | Lithuania | Other exposure to mechanical forces             | 91 (56 to 143)   | 82 (50 to 129)   | -10% (-17.5% to -2.7%)    |
| 41 | Lithuania | Other road injuries                             | 4 (2 to 6)       | 2 (1 to 4)       | -40.6% (-50.1% to -30.3%) |
| 42 | Lithuania | Other transport injuries                        | 7 (5 to 9)       | 6 (4 to 8)       | -14.4% (-21.6% to -7.1%)  |
| 43 | Lithuania | Other unintentional injuries                    | 32 (20 to 51)    | 25 (15 to 42)    | -21.4% (-28.8% to -14.2%) |
| 44 | Lithuania | Pedestrian road injuries                        | 108 (84 to 134)  | 40 (31 to 51)    | -62.5% (-67.2% to -57.5%) |
| 45 |           |                                                 |                  |                  |                           |
| 46 |           |                                                 |                  |                  |                           |



|    |            |                                                 |                  |                  |                           |
|----|------------|-------------------------------------------------|------------------|------------------|---------------------------|
| 1  |            |                                                 |                  |                  |                           |
| 2  | Lithuania  | Physical violence by firearm                    | 0 (0 to 1)       | 0 (0 to 1)       | -31.4% (-48.5% to -11%)   |
| 3  | Lithuania  | Physical violence by other means                | 35 (26 to 50)    | 27 (19 to 37)    | -25.1% (-33.1% to -16.8%) |
| 4  | Lithuania  | Physical violence by sharp object               | 5 (3 to 8)       | 3 (2 to 5)       | -40.5% (-50.7% to -31.4%) |
| 5  | Lithuania  | Poisoning by carbon monoxide                    | 0 (0 to 0)       | 0 (0 to 0)       | -1.1% (-12.5% to 10.7%)   |
| 6  | Lithuania  | Poisoning by other means                        | 0 (0 to 1)       | 0 (0 to 1)       | -8% (-17.5% to 1.4%)      |
| 7  | Lithuania  | Pulmonary aspiration and foreign body in airway | 1 (1 to 2)       | 1 (1 to 2)       | -18.7% (-25.7% to -11.9%) |
| 8  | Lithuania  | Self-harm by firearm                            | 1 (1 to 2)       | 1 (1 to 2)       | -23.5% (-36.4% to -8.6%)  |
| 9  | Lithuania  | Self-harm by other specified means              | 7 (5 to 11)      | 6 (4 to 10)      | -8.4% (-13.9% to -2.6%)   |
| 10 | Lithuania  | Unintentional firearm injuries                  | 1 (1 to 2)       | 1 (1 to 2)       | -10.4% (-22.2% to 1.6%)   |
| 11 | Lithuania  | Venomous animal contact                         | 3 (1 to 6)       | 3 (1 to 6)       | -7.1% (-12.5% to -1.4%)   |
| 12 | Luxembourg | Adverse effects of medical treatment            | 0 (0 to 0)       | 0 (0 to 0)       | 0% (0% to 0%)             |
| 13 | Luxembourg | Conflict and terrorism                          | 0 (0 to 0)       | 0 (0 to 0)       | NA                        |
| 14 | Luxembourg | Cyclist road injuries                           | 26 (18 to 35)    | 20 (14 to 27)    | -22% (-32.7% to -10.3%)   |
| 15 | Luxembourg | Drowning                                        | 0 (0 to 0)       | 0 (0 to 0)       | 77.3% (61.4% to 97%)      |
| 16 | Luxembourg | Environmental heat and cold exposure            | 2 (1 to 3)       | 2 (1 to 3)       | 0.2% (-4.8% to 4.3%)      |
| 17 | Luxembourg | Executions and police conflict                  | 0 (0 to 0)       | 0 (0 to 0)       | NA                        |
| 18 | Luxembourg | Exposure to forces of nature                    | 0 (0 to 0)       | 0 (0 to 0)       | NA                        |
| 19 | Luxembourg | Falls                                           | 290 (228 to 366) | 304 (239 to 386) | 5% (-0.2% to 10.4%)       |
| 20 | Luxembourg | Fire, heat, and hot substances                  | 2 (1 to 4)       | 2 (1 to 4)       | -2.7% (-7.9% to 3%)       |
| 21 | Luxembourg | Foreign body in eyes                            | 0 (0 to 0)       | 0 (0 to 0)       | 0.7% (0.2% to 1.7%)       |
| 22 | Luxembourg | Foreign body in other body part                 | 2 (1 to 3)       | 2 (1 to 3)       | 1.5% (-3.1% to 6.4%)      |
| 23 | Luxembourg | Motor vehicle road injuries                     | 56 (44 to 71)    | 24 (18 to 32)    | -56.9% (-62.8% to -50.4%) |
| 24 | Luxembourg | Motorcyclist road injuries                      | 11 (8 to 15)     | 10 (7 to 13)     | -13% (-27.3% to 3.1%)     |
| 25 | Luxembourg | Non-venomous animal contact                     | 2 (1 to 4)       | 2 (1 to 3)       | -19.2% (-23.2% to -15.1%) |
| 26 | Luxembourg | Other exposure to mechanical forces             | 56 (35 to 88)    | 44 (27 to 71)    | -21.1% (-28.4% to -13.7%) |
| 27 | Luxembourg | Other road injuries                             | 1 (1 to 2)       | 1 (1 to 2)       | -7.5% (-20.4% to 8.1%)    |
| 28 | Luxembourg | Other transport injuries                        | 4 (3 to 6)       | 4 (3 to 6)       | -0.6% (-6.5% to 5.3%)     |
| 29 | Luxembourg | Other unintentional injuries                    | 45 (30 to 69)    | 25 (16 to 39)    | -44.9% (-49.7% to -40%)   |
| 30 | Luxembourg | Pedestrian road injuries                        | 17 (13 to 22)    | 7 (5 to 9)       | -61.4% (-67.5% to -53.9%) |
| 31 | Luxembourg | Physical violence by firearm                    | 0 (0 to 1)       | 1 (0 to 1)       | 57.8% (37.9% to 79.7%)    |
| 32 | Luxembourg | Physical violence by other means                | 19 (13 to 27)    | 15 (10 to 22)    | -19.6% (-26.2% to -12.2%) |
| 33 | Luxembourg | Physical violence by sharp object               | 2 (1 to 3)       | 1 (1 to 2)       | -17.2% (-29.4% to -6.4%)  |
| 34 | Luxembourg | Poisoning by carbon monoxide                    | 0 (0 to 0)       | 0 (0 to 0)       | 4.8% (-3.5% to 13.7%)     |
| 35 | Luxembourg | Poisoning by other means                        | 0 (0 to 0)       | 0 (0 to 0)       | -8.3% (-14.6% to -2.8%)   |
| 36 | Luxembourg | Pulmonary aspiration and foreign body in airway | 1 (1 to 2)       | 1 (0 to 1)       | -22.8% (-30.6% to -16.3%) |
| 37 | Luxembourg | Self-harm by firearm                            | 1 (0 to 1)       | 1 (0 to 1)       | -15% (-26.9% to -0.9%)    |
| 38 | Luxembourg | Self-harm by other specified means              | 4 (2 to 6)       | 2 (1 to 4)       | -36.8% (-41.2% to -32.8%) |
| 39 | Luxembourg | Unintentional firearm injuries                  | 1 (1 to 2)       | 1 (1 to 2)       | -0.7% (-10.7% to 10.4%)   |
| 40 | Luxembourg | Venomous animal contact                         | 1 (0 to 2)       | 1 (0 to 2)       | -18.1% (-23.3% to -13%)   |
| 41 | Madagascar | Adverse effects of medical treatment            | 0 (0 to 0)       | 0 (0 to 0)       | 0% (0% to 0%)             |
| 42 | Madagascar | Conflict and terrorism                          | 0 (0 to 0)       | 2 (1 to 6)       | NA                        |
| 43 | Madagascar | Cyclist road injuries                           | 34 (22 to 51)    | 32 (21 to 47)    | -5.8% (-13.1% to 1.9%)    |
| 44 | Madagascar | Drowning                                        | 0 (0 to 0)       | 0 (0 to 0)       | -13.6% (-21.9% to -4.5%)  |
| 45 |            |                                                 |                  |                  |                           |
| 46 |            |                                                 |                  |                  |                           |

|    |            |                                                 |               |               |                           |
|----|------------|-------------------------------------------------|---------------|---------------|---------------------------|
| 1  |            |                                                 |               |               |                           |
| 2  | Madagascar | Environmental heat and cold exposure            | 0 (0 to 1)    | 0 (0 to 1)    | -3.9% (-10.9% to 3.4%)    |
| 3  | Madagascar | Executions and police conflict                  | 0 (0 to 0)    | 0 (0 to 0)    | NA                        |
| 4  | Madagascar | Exposure to forces of nature                    | 0 (0 to 0)    | 0 (0 to 0)    | NA                        |
| 5  | Madagascar | Falls                                           | 23 (14 to 35) | 25 (16 to 40) | 11.2% (5.5% to 17%)       |
| 6  | Madagascar | Fire, heat, and hot substances                  | 0 (0 to 1)    | 0 (0 to 1)    | -16.6% (-22.7% to -10.4%) |
| 7  | Madagascar | Foreign body in eyes                            | 0 (0 to 0)    | 0 (0 to 0)    | -0.5% (-1.3% to 0%)       |
| 8  | Madagascar | Foreign body in other body part                 | 3 (1 to 7)    | 3 (1 to 8)    | 5.5% (-0.7% to 12%)       |
| 9  | Madagascar | Motor vehicle road injuries                     | 48 (32 to 68) | 41 (27 to 58) | -14.2% (-21.1% to -6.4%)  |
| 10 | Madagascar | Motorcyclist road injuries                      | 17 (12 to 24) | 15 (10 to 21) | -12.9% (-19.8% to -5.1%)  |
| 11 | Madagascar | Non-venomous animal contact                     | 7 (3 to 14)   | 6 (3 to 12)   | -11.6% (-16.4% to -6.6%)  |
| 12 | Madagascar | Other exposure to mechanical forces             | 33 (17 to 59) | 30 (15 to 54) | -8.7% (-15.8% to -0.7%)   |
| 13 | Madagascar | Other road injuries                             | 2 (1 to 4)    | 2 (1 to 4)    | 5.2% (-4.3% to 16.2%)     |
| 14 | Madagascar | Other transport injuries                        | 3 (2 to 4)    | 3 (2 to 4)    | -3.9% (-11.7% to 3.4%)    |
| 15 | Madagascar | Other unintentional injuries                    | 3 (2 to 5)    | 3 (2 to 5)    | -10.5% (-17.8% to -2.8%)  |
| 16 | Madagascar | Pedestrian road injuries                        | 74 (55 to 96) | 62 (46 to 82) | -16.1% (-21.4% to -9.8%)  |
| 17 | Madagascar | Physical violence by firearm                    | 0 (0 to 0)    | 0 (0 to 0)    | 14.2% (1.7% to 28.7%)     |
| 18 | Madagascar | Physical violence by other means                | 4 (2 to 6)    | 4 (3 to 6)    | 10.4% (2.9% to 20.3%)     |
| 19 | Madagascar | Physical violence by sharp object               | 1 (1 to 2)    | 1 (1 to 2)    | 4.9% (-4.6% to 15.9%)     |
| 20 | Madagascar | Poisoning by carbon monoxide                    | 0 (0 to 0)    | 0 (0 to 0)    | 8.1% (-4.7% to 24.5%)     |
| 21 | Madagascar | Poisoning by other means                        | 0 (0 to 0)    | 0 (0 to 0)    | -23.5% (-31.2% to -15.6%) |
| 22 | Madagascar | Pulmonary aspiration and foreign body in airway | 0 (0 to 0)    | 0 (0 to 0)    | -9% (-20.3% to 1.6%)      |
| 23 | Madagascar | Self-harm by firearm                            | 0 (0 to 0)    | 0 (0 to 0)    | 5.6% (-1.7% to 14.8%)     |
| 24 | Madagascar | Self-harm by other specified means              | 0 (0 to 0)    | 0 (0 to 0)    | -18.1% (-23.2% to -13.2%) |
| 25 | Madagascar | Unintentional firearm injuries                  | 1 (0 to 2)    | 1 (0 to 2)    | -12% (-20.4% to -2%)      |
| 26 | Madagascar | Venomous animal contact                         | 1 (0 to 3)    | 1 (0 to 3)    | -18.9% (-27.1% to -12.1%) |
| 27 | Malawi     | Adverse effects of medical treatment            | 0 (0 to 0)    | 0 (0 to 0)    | 0% (0% to 0%)             |
| 28 | Malawi     | Conflict and terrorism                          | 0 (0 to 0)    | 0 (0 to 0)    | NA                        |
| 29 | Malawi     | Cyclist road injuries                           | 30 (19 to 44) | 29 (19 to 41) | -4% (-10.5% to 4.2%)      |
| 30 | Malawi     | Drowning                                        | 0 (0 to 0)    | 0 (0 to 0)    | -5.7% (-13.1% to 1.5%)    |
| 31 | Malawi     | Environmental heat and cold exposure            | 0 (0 to 1)    | 0 (0 to 1)    | 1.1% (-4.9% to 7.7%)      |
| 32 | Malawi     | Executions and police conflict                  | 0 (0 to 0)    | 0 (0 to 0)    | NA                        |
| 33 | Malawi     | Exposure to forces of nature                    | 0 (0 to 0)    | 1 (0 to 1)    | NA                        |
| 34 | Malawi     | Falls                                           | 24 (15 to 36) | 28 (18 to 43) | 19% (14.7% to 23.4%)      |
| 35 | Malawi     | Fire, heat, and hot substances                  | 0 (0 to 1)    | 0 (0 to 1)    | -7.3% (-13% to -1.5%)     |
| 36 | Malawi     | Foreign body in eyes                            | 0 (0 to 0)    | 0 (0 to 0)    | -0.7% (-1.8% to -0.1%)    |
| 37 | Malawi     | Foreign body in other body part                 | 3 (1 to 7)    | 3 (1 to 7)    | -1.2% (-7.1% to 5%)       |
| 38 | Malawi     | Motor vehicle road injuries                     | 34 (22 to 48) | 32 (21 to 45) | -5.8% (-14% to 2.5%)      |
| 39 | Malawi     | Motorcyclist road injuries                      | 19 (13 to 26) | 15 (10 to 21) | -18.5% (-24.8% to -11.8%) |
| 40 | Malawi     | Non-venomous animal contact                     | 5 (3 to 11)   | 5 (2 to 10)   | -7.5% (-12.5% to -2.5%)   |
| 41 | Malawi     | Other exposure to mechanical forces             | 24 (12 to 44) | 24 (12 to 44) | 0.8% (-5.4% to 7.8%)      |
| 42 | Malawi     | Other road injuries                             | 1 (1 to 3)    | 1 (1 to 3)    | 0.3% (-8.7% to 10.5%)     |
| 43 | Malawi     | Other transport injuries                        | 3 (2 to 4)    | 3 (2 to 4)    | 1.5% (-5.3% to 7.6%)      |
| 44 | Malawi     | Other unintentional injuries                    | 2 (1 to 4)    | 2 (1 to 4)    | -1.6% (-10.2% to 6.8%)    |
| 45 |            |                                                 |               |               |                           |
| 46 |            |                                                 |               |               |                           |

|    |          |                                                 |               |                |                           |
|----|----------|-------------------------------------------------|---------------|----------------|---------------------------|
| 1  |          |                                                 |               |                |                           |
| 2  | Malawi   | Pedestrian road injuries                        | 52 (38 to 68) | 47 (34 to 62)  | -10.3% (-16.4% to -3.2%)  |
| 3  | Malawi   | Physical violence by firearm                    | 0 (0 to 0)    | 0 (0 to 0)     | 33.7% (19.8% to 49.7%)    |
| 4  | Malawi   | Physical violence by other means                | 3 (2 to 5)    | 3 (2 to 5)     | 9.8% (4.2% to 16.9%)      |
| 5  | Malawi   | Physical violence by sharp object               | 1 (0 to 2)    | 1 (1 to 2)     | 7.7% (1% to 15.6%)        |
| 6  | Malawi   | Poisoning by carbon monoxide                    | 0 (0 to 0)    | 0 (0 to 0)     | 10.4% (-0.5% to 23.2%)    |
| 7  | Malawi   | Poisoning by other means                        | 0 (0 to 0)    | 0 (0 to 0)     | -12.5% (-20.1% to -5%)    |
| 8  | Malawi   | Pulmonary aspiration and foreign body in airway | 0 (0 to 0)    | 0 (0 to 0)     | -13.4% (-23.1% to -2.9%)  |
| 9  | Malawi   | Self-harm by firearm                            | 0 (0 to 0)    | 0 (0 to 0)     | 10.8% (2.3% to 23.1%)     |
| 10 | Malawi   | Self-harm by other specified means              | 0 (0 to 0)    | 0 (0 to 0)     | -12.9% (-18.5% to -7.2%)  |
| 11 | Malawi   | Unintentional firearm injuries                  | 1 (0 to 2)    | 1 (0 to 2)     | -7.2% (-15.5% to 2.6%)    |
| 12 | Malawi   | Venomous animal contact                         | 1 (0 to 2)    | 1 (0 to 2)     | -5.4% (-14.6% to 3%)      |
| 13 | Malaysia | Adverse effects of medical treatment            | 0 (0 to 0)    | 0 (0 to 0)     | 0% (0% to 0%)             |
| 14 | Malaysia | Conflict and terrorism                          | 0 (0 to 0)    | 0 (0 to 0)     | NA                        |
| 15 | Malaysia | Cyclist road injuries                           | 21 (14 to 30) | 21 (14 to 30)  | 0.3% (-8.8% to 10.2%)     |
| 16 | Malaysia | Drowning                                        | 0 (0 to 0)    | 0 (0 to 1)     | 38.2% (25.5% to 52.4%)    |
| 17 | Malaysia | Environmental heat and cold exposure            | 2 (1 to 3)    | 2 (1 to 3)     | 3.8% (-0.6% to 8.7%)      |
| 18 | Malaysia | Executions and police conflict                  | 0 (0 to 0)    | 0 (0 to 0)     | NA                        |
| 19 | Malaysia | Exposure to forces of nature                    | 0 (0 to 0)    | 0 (0 to 0)     | NA                        |
| 20 | Malaysia | Falls                                           | 57 (45 to 72) | 80 (64 to 101) | 40.2% (35% to 44.9%)      |
| 21 | Malaysia | Fire, heat, and hot substances                  | 1 (1 to 2)    | 1 (1 to 2)     | -10.6% (-15.7% to -6.2%)  |
| 22 | Malaysia | Foreign body in eyes                            | 0 (0 to 0)    | 0 (0 to 0)     | 1.6% (1.1% to 2.4%)       |
| 23 | Malaysia | Foreign body in other body part                 | 1 (0 to 2)    | 1 (0 to 2)     | 1.4% (-3.5% to 5.8%)      |
| 24 | Malaysia | Motor vehicle road injuries                     | 49 (37 to 63) | 53 (40 to 67)  | 8.1% (-2.1% to 19.6%)     |
| 25 | Malaysia | Motorcyclist road injuries                      | 58 (46 to 72) | 62 (48 to 77)  | 6.1% (-3.2% to 17.7%)     |
| 26 | Malaysia | Non-venomous animal contact                     | 4 (2 to 7)    | 3 (2 to 5)     | -22.2% (-26.5% to -18.1%) |
| 27 | Malaysia | Other exposure to mechanical forces             | 19 (11 to 32) | 18 (10 to 29)  | -7.2% (-12.2% to -2.5%)   |
| 28 | Malaysia | Other road injuries                             | 2 (1 to 3)    | 2 (1 to 3)     | 0.2% (-10.1% to 10.6%)    |
| 29 | Malaysia | Other transport injuries                        | 8 (6 to 10)   | 7 (6 to 9)     | -9.5% (-15.2% to -3.7%)   |
| 30 | Malaysia | Other unintentional injuries                    | 11 (7 to 18)  | 10 (6 to 16)   | -15.3% (-22.9% to -9.7%)  |
| 31 | Malaysia | Pedestrian road injuries                        | 25 (19 to 32) | 23 (17 to 29)  | -9.2% (-16.3% to -1.5%)   |
| 32 | Malaysia | Physical violence by firearm                    | 0 (0 to 0)    | 0 (0 to 0)     | 91% (74.1% to 110%)       |
| 33 | Malaysia | Physical violence by other means                | 17 (12 to 24) | 18 (13 to 26)  | 6.4% (-0.3% to 14.2%)     |
| 34 | Malaysia | Physical violence by sharp object               | 2 (1 to 3)    | 2 (1 to 3)     | 2.1% (-6.8% to 12.4%)     |
| 35 | Malaysia | Poisoning by carbon monoxide                    | 0 (0 to 0)    | 0 (0 to 0)     | 24.8% (13.5% to 37.7%)    |
| 36 | Malaysia | Poisoning by other means                        | 0 (0 to 0)    | 0 (0 to 0)     | -21% (-27.5% to -13.9%)   |
| 37 | Malaysia | Pulmonary aspiration and foreign body in airway | 0 (0 to 1)    | 0 (0 to 0)     | -17.1% (-24.8% to -8.2%)  |
| 38 | Malaysia | Self-harm by firearm                            | 0 (0 to 0)    | 0 (0 to 0)     | 30.9% (10.9% to 56.4%)    |
| 39 | Malaysia | Self-harm by other specified means              | 1 (1 to 2)    | 1 (1 to 2)     | 1.4% (-4.6% to 7.8%)      |
| 40 | Malaysia | Unintentional firearm injuries                  | 2 (1 to 3)    | 2 (1 to 3)     | -4% (-11% to 3.4%)        |
| 41 | Malaysia | Venomous animal contact                         | 1 (0 to 2)    | 1 (0 to 2)     | -25.2% (-31.1% to -19.3%) |
| 42 | Maldives | Adverse effects of medical treatment            | 0 (0 to 0)    | 0 (0 to 0)     | 0% (0% to 0%)             |
| 43 | Maldives | Conflict and terrorism                          | 0 (0 to 0)    | 0 (0 to 0)     | NA                        |
| 44 | Maldives | Cyclist road injuries                           | 19 (13 to 27) | 13 (9 to 19)   | -30.8% (-38.7% to -22.4%) |
| 45 |          |                                                 |               |                |                           |
| 46 |          |                                                 |               |                |                           |

|    |          |                                                 |               |                |                           |
|----|----------|-------------------------------------------------|---------------|----------------|---------------------------|
| 1  |          |                                                 |               |                |                           |
| 2  | Maldives | Drowning                                        | 1 (0 to 1)    | 1 (0 to 1)     | 23% (8% to 41.2%)         |
| 3  | Maldives | Environmental heat and cold exposure            | 1 (1 to 2)    | 1 (1 to 2)     | -4.7% (-9.1% to 0.5%)     |
| 4  | Maldives | Executions and police conflict                  | 0 (0 to 0)    | 0 (0 to 0)     | NA                        |
| 5  | Maldives | Exposure to forces of nature                    | 0 (0 to 0)    | 0 (0 to 0)     | NA                        |
| 6  | Maldives | Falls                                           | 58 (46 to 73) | 88 (70 to 109) | 50.4% (43.6% to 57.3%)    |
| 7  | Maldives | Fire, heat, and hot substances                  | 2 (1 to 3)    | 1 (1 to 2)     | -33.8% (-42.6% to -26%)   |
| 8  | Maldives | Foreign body in eyes                            | 0 (0 to 0)    | 0 (0 to 0)     | 6.4% (3.4% to 10.3%)      |
| 9  | Maldives | Foreign body in other body part                 | 1 (0 to 2)    | 1 (1 to 2)     | 6.2% (0.5% to 12.3%)      |
| 10 | Maldives | Motor vehicle road injuries                     | 13 (9 to 18)  | 11 (8 to 16)   | -13.1% (-21.3% to -3.7%)  |
| 11 | Maldives | Motorcyclist road injuries                      | 38 (30 to 47) | 27 (21 to 34)  | -27.8% (-34% to -21.7%)   |
| 12 | Maldives | Non-venomous animal contact                     | 5 (3 to 9)    | 4 (2 to 6)     | -28.1% (-34.2% to -21.9%) |
| 13 | Maldives | Other exposure to mechanical forces             | 23 (13 to 37) | 19 (11 to 31)  | -18.5% (-26.3% to -10.8%) |
| 14 | Maldives | Other road injuries                             | 1 (1 to 2)    | 1 (1 to 2)     | 7.9% (-3.2% to 21.8%)     |
| 15 | Maldives | Other transport injuries                        | 5 (4 to 7)    | 5 (4 to 7)     | 6.3% (-2% to 14.2%)       |
| 16 | Maldives | Other unintentional injuries                    | 12 (8 to 19)  | 9 (6 to 15)    | -25.4% (-33.3% to -16.3%) |
| 17 | Maldives | Pedestrian road injuries                        | 10 (7 to 13)  | 8 (6 to 11)    | -16.2% (-25% to -7.5%)    |
| 18 | Maldives | Physical violence by firearm                    | 0 (0 to 0)    | 0 (0 to 1)     | 203.5% (167.8% to 246.6%) |
| 19 | Maldives | Physical violence by other means                | 14 (10 to 20) | 18 (13 to 26)  | 28.3% (19.2% to 37.3%)    |
| 20 | Maldives | Physical violence by sharp object               | 2 (1 to 4)    | 3 (2 to 4)     | 20.4% (8.4% to 33.8%)     |
| 21 | Maldives | Poisoning by carbon monoxide                    | 0 (0 to 0)    | 0 (0 to 0)     | 45.2% (30.5% to 62.2%)    |
| 22 | Maldives | Poisoning by other means                        | 0 (0 to 0)    | 0 (0 to 0)     | 14% (6.7% to 21.3%)       |
| 23 | Maldives | Pulmonary aspiration and foreign body in airway | 0 (0 to 1)    | 0 (0 to 0)     | -38.1% (-45.5% to -29.8%) |
| 24 | Maldives | Self-harm by firearm                            | 0 (0 to 0)    | 0 (0 to 0)     | 29.9% (6.4% to 58.3%)     |
| 25 | Maldives | Self-harm by other specified means              | 1 (1 to 2)    | 1 (1 to 2)     | -15.3% (-21% to -9.5%)    |
| 26 | Maldives | Unintentional firearm injuries                  | 2 (1 to 4)    | 2 (1 to 4)     | -9% (-18.4% to 1.1%)      |
| 27 | Maldives | Venomous animal contact                         | 1 (0 to 3)    | 1 (0 to 2)     | -21.8% (-29.3% to -12%)   |
| 28 | Mali     | Adverse effects of medical treatment            | 0 (0 to 0)    | 0 (0 to 0)     | 0% (0% to 0%)             |
| 29 | Mali     | Conflict and terrorism                          | 32 (10 to 79) | 21 (6 to 53)   | NA                        |
| 30 | Mali     | Cyclist road injuries                           | 22 (13 to 32) | 26 (16 to 38)  | 19.5% (10.9% to 28.7%)    |
| 31 | Mali     | Drowning                                        | 0 (0 to 0)    | 0 (0 to 0)     | -9.8% (-17.7% to -1.8%)   |
| 32 | Mali     | Environmental heat and cold exposure            | 0 (0 to 1)    | 0 (0 to 1)     | 1.4% (-4.3% to 8.1%)      |
| 33 | Mali     | Executions and police conflict                  | 0 (0 to 0)    | 1 (0 to 2)     | NA                        |
| 34 | Mali     | Exposure to forces of nature                    | 0 (0 to 0)    | 0 (0 to 0)     | NA                        |
| 35 | Mali     | Falls                                           | 18 (12 to 27) | 22 (14 to 32)  | 16.6% (12.9% to 21.1%)    |
| 36 | Mali     | Fire, heat, and hot substances                  | 0 (0 to 0)    | 0 (0 to 0)     | -9.6% (-15.3% to -3.2%)   |
| 37 | Mali     | Foreign body in eyes                            | 0 (0 to 0)    | 0 (0 to 0)     | 0.8% (0.1% to 1.7%)       |
| 38 | Mali     | Foreign body in other body part                 | 4 (2 to 8)    | 4 (2 to 8)     | 0.5% (-4.7% to 5.1%)      |
| 39 | Mali     | Motor vehicle road injuries                     | 46 (32 to 64) | 49 (34 to 68)  | 7.4% (-0.5% to 16.2%)     |
| 40 | Mali     | Motorcyclist road injuries                      | 18 (13 to 26) | 19 (13 to 26)  | 1.4% (-6.2% to 9.4%)      |
| 41 | Mali     | Non-venomous animal contact                     | 3 (2 to 7)    | 3 (1 to 6)     | -15% (-20.1% to -10.3%)   |
| 42 | Mali     | Other exposure to mechanical forces             | 24 (12 to 44) | 21 (11 to 39)  | -9.7% (-14.9% to -3.9%)   |
| 43 | Mali     | Other road injuries                             | 2 (1 to 3)    | 2 (1 to 4)     | 16.9% (5.7% to 28.1%)     |
| 44 | Mali     | Other transport injuries                        | 3 (2 to 4)    | 3 (2 to 4)     | -9.2% (-15.8% to -2.1%)   |
| 45 |          |                                                 |               |                |                           |
| 46 |          |                                                 |               |                |                           |

|    |                  |                                                 |                  |                  |                           |
|----|------------------|-------------------------------------------------|------------------|------------------|---------------------------|
| 1  |                  |                                                 |                  |                  |                           |
| 2  | Mali             | Other unintentional injuries                    | 3 (2 to 5)       | 2 (1 to 4)       | -17.5% (-22% to -12.8%)   |
| 3  | Mali             | Pedestrian road injuries                        | 55 (40 to 71)    | 49 (36 to 65)    | -9.8% (-15.5% to -4.1%)   |
| 4  | Mali             | Physical violence by firearm                    | 0 (0 to 0)       | 0 (0 to 0)       | 22% (8.9% to 36.8%)       |
| 5  | Mali             | Physical violence by other means                | 9 (6 to 14)      | 9 (6 to 14)      | 2.5% (-3% to 8.2%)        |
| 6  | Mali             | Physical violence by sharp object               | 3 (2 to 6)       | 3 (2 to 6)       | 1% (-6.2% to 9.1%)        |
| 7  | Mali             | Poisoning by carbon monoxide                    | 0 (0 to 0)       | 0 (0 to 0)       | 7.8% (-3.3% to 20.7%)     |
| 8  | Mali             | Poisoning by other means                        | 0 (0 to 0)       | 0 (0 to 0)       | -20% (-27.1% to -12.2%)   |
| 9  | Mali             | Pulmonary aspiration and foreign body in airway | 0 (0 to 0)       | 0 (0 to 0)       | -16.9% (-24.7% to -8.7%)  |
| 10 | Mali             | Self-harm by firearm                            | 0 (0 to 0)       | 0 (0 to 0)       | 13.9% (6.1% to 23.7%)     |
| 11 | Mali             | Self-harm by other specified means              | 0 (0 to 0)       | 0 (0 to 0)       | -4.4% (-9.8% to 1%)       |
| 12 | Mali             | Unintentional firearm injuries                  | 1 (0 to 2)       | 1 (0 to 2)       | -14.4% (-22.8% to -5.8%)  |
| 13 | Mali             | Venomous animal contact                         | 0 (0 to 1)       | 0 (0 to 1)       | -12.1% (-18.9% to -4.6%)  |
| 14 | Malta            | Adverse effects of medical treatment            | 0 (0 to 0)       | 0 (0 to 0)       | 0% (0% to 0%)             |
| 15 | Malta            | Conflict and terrorism                          | 0 (0 to 0)       | 0 (0 to 0)       | NA                        |
| 16 | Malta            | Cyclist road injuries                           | 18 (12 to 24)    | 17 (12 to 22)    | -6.8% (-15.9% to 3.5%)    |
| 17 | Malta            | Drowning                                        | 0 (0 to 0)       | 0 (0 to 0)       | 68.6% (55.7% to 83.5%)    |
| 18 | Malta            | Environmental heat and cold exposure            | 2 (2 to 3)       | 2 (1 to 3)       | -6.4% (-10.8% to -1.5%)   |
| 19 | Malta            | Executions and police conflict                  | 0 (0 to 0)       | 0 (0 to 0)       | NA                        |
| 20 | Malta            | Exposure to forces of nature                    | 0 (0 to 0)       | 0 (0 to 0)       | NA                        |
| 21 | Malta            | Falls                                           | 250 (194 to 321) | 290 (222 to 380) | 16% (11.7% to 20.3%)      |
| 22 | Malta            | Fire, heat, and hot substances                  | 3 (2 to 4)       | 3 (2 to 4)       | -2.3% (-7.4% to 2.9%)     |
| 23 | Malta            | Foreign body in eyes                            | 0 (0 to 0)       | 0 (0 to 0)       | 0.9% (0.4% to 1.7%)       |
| 24 | Malta            | Foreign body in other body part                 | 2 (1 to 3)       | 2 (1 to 3)       | 1.2% (-3.7% to 6.3%)      |
| 25 | Malta            | Motor vehicle road injuries                     | 22 (16 to 29)    | 17 (12 to 22)    | -24.4% (-33.2% to -14.6%) |
| 26 | Malta            | Motorcyclist road injuries                      | 8 (6 to 10)      | 8 (6 to 11)      | 3.5% (-11.3% to 22%)      |
| 27 | Malta            | Non-venomous animal contact                     | 3 (1 to 4)       | 2 (1 to 4)       | -18.9% (-22.6% to -15.1%) |
| 28 | Malta            | Other exposure to mechanical forces             | 49 (30 to 76)    | 46 (28 to 73)    | -5% (-10.8% to 2.4%)      |
| 29 | Malta            | Other road injuries                             | 1 (1 to 2)       | 1 (1 to 2)       | -0.5% (-10.6% to 11.4%)   |
| 30 | Malta            | Other transport injuries                        | 4 (3 to 5)       | 4 (3 to 5)       | 2.8% (-2% to 7.9%)        |
| 31 | Malta            | Other unintentional injuries                    | 28 (18 to 44)    | 22 (14 to 36)    | -20.3% (-25.5% to -15.8%) |
| 32 | Malta            | Pedestrian road injuries                        | 9 (6 to 11)      | 7 (5 to 9)       | -25.2% (-35.2% to -15%)   |
| 33 | Malta            | Physical violence by firearm                    | 1 (0 to 1)       | 1 (0 to 1)       | 24.1% (13.5% to 35.5%)    |
| 34 | Malta            | Physical violence by other means                | 22 (15 to 31)    | 21 (14 to 30)    | -3.8% (-9.4% to 3%)       |
| 35 | Malta            | Physical violence by sharp object               | 2 (1 to 3)       | 2 (1 to 3)       | -2.6% (-11% to 6.2%)      |
| 36 | Malta            | Poisoning by carbon monoxide                    | 0 (0 to 0)       | 0 (0 to 0)       | 11.3% (2.1% to 21.1%)     |
| 37 | Malta            | Poisoning by other means                        | 0 (0 to 0)       | 0 (0 to 0)       | -1.5% (-8.7% to 5.2%)     |
| 38 | Malta            | Pulmonary aspiration and foreign body in airway | 1 (0 to 1)       | 1 (0 to 1)       | -13.1% (-20.8% to -5%)    |
| 39 | Malta            | Self-harm by firearm                            | 0 (0 to 0)       | 0 (0 to 0)       | 13.4% (1.3% to 26.1%)     |
| 40 | Malta            | Self-harm by other specified means              | 1 (1 to 2)       | 1 (1 to 2)       | 5.5% (-0.6% to 11.4%)     |
| 41 | Malta            | Unintentional firearm injuries                  | 1 (1 to 2)       | 1 (1 to 2)       | -5.9% (-14.5% to 3.4%)    |
| 42 | Malta            | Venomous animal contact                         | 1 (0 to 2)       | 1 (0 to 2)       | -18.8% (-23.6% to -14%)   |
| 43 | Marshall Islands | Adverse effects of medical treatment            | 0 (0 to 0)       | 0 (0 to 0)       | 0% (0% to 0%)             |
| 44 | Marshall Islands | Conflict and terrorism                          | 0 (0 to 0)       | 0 (0 to 0)       | NA                        |
| 45 |                  |                                                 |                  |                  |                           |
| 46 |                  |                                                 |                  |                  |                           |

|    |                  |                                                 |                |                |                           |
|----|------------------|-------------------------------------------------|----------------|----------------|---------------------------|
| 1  |                  |                                                 |                |                |                           |
| 2  | Marshall Islands | Cyclist road injuries                           | 10 (7 to 14)   | 10 (7 to 15)   | 0.6% (-5.7% to 7.6%)      |
| 3  | Marshall Islands | Drowning                                        | 0 (0 to 1)     | 0 (0 to 1)     | 2% (-6.2% to 11.9%)       |
| 4  | Marshall Islands | Environmental heat and cold exposure            | 2 (2 to 3)     | 2 (2 to 3)     | -2.3% (-7.3% to 2.7%)     |
| 5  | Marshall Islands | Executions and police conflict                  | 0 (0 to 0)     | 0 (0 to 0)     | NA                        |
| 6  | Marshall Islands | Exposure to forces of nature                    | 0 (0 to 0)     | 0 (0 to 0)     | NA                        |
| 7  | Marshall Islands | Falls                                           | 48 (37 to 61)  | 65 (51 to 85)  | 37.7% (32.7% to 42.8%)    |
| 8  | Marshall Islands | Fire, heat, and hot substances                  | 1 (1 to 2)     | 1 (1 to 2)     | -0.2% (-6.1% to 6.3%)     |
| 9  | Marshall Islands | Foreign body in eyes                            | 0 (0 to 0)     | 0 (0 to 0)     | 0.6% (-0.1% to 1.7%)      |
| 10 | Marshall Islands | Foreign body in other body part                 | 1 (0 to 1)     | 1 (0 to 1)     | -2.4% (-7% to 2.7%)       |
| 11 | Marshall Islands | Motor vehicle road injuries                     | 35 (27 to 44)  | 35 (27 to 44)  | -0.2% (-6.8% to 6.3%)     |
| 12 | Marshall Islands | Motorcyclist road injuries                      | 14 (10 to 18)  | 14 (10 to 18)  | 0% (-8.2% to 8.2%)        |
| 13 | Marshall Islands | Non-venomous animal contact                     | 5 (3 to 8)     | 4 (2 to 7)     | -14.8% (-19.1% to -10.6%) |
| 14 | Marshall Islands | Other exposure to mechanical forces             | 14 (8 to 22)   | 11 (7 to 19)   | -15.8% (-20.7% to -10.8%) |
| 15 | Marshall Islands | Other road injuries                             | 1 (1 to 2)     | 1 (1 to 2)     | -0.2% (-8.8% to 8.8%)     |
| 16 | Marshall Islands | Other transport injuries                        | 8 (6 to 10)    | 8 (6 to 10)    | -4.9% (-9.4% to -0.1%)    |
| 17 | Marshall Islands | Other unintentional injuries                    | 7 (4 to 11)    | 7 (4 to 10)    | -4.2% (-8.6% to 0.5%)     |
| 18 | Marshall Islands | Pedestrian road injuries                        | 14 (11 to 18)  | 13 (10 to 17)  | -7.3% (-14.5% to 0.7%)    |
| 19 | Marshall Islands | Physical violence by firearm                    | 0 (0 to 0)     | 0 (0 to 0)     | -11% (-22.7% to 3.1%)     |
| 20 | Marshall Islands | Physical violence by other means                | 36 (25 to 50)  | 33 (23 to 46)  | -8% (-13.7% to -1.2%)     |
| 21 | Marshall Islands | Physical violence by sharp object               | 3 (2 to 5)     | 2 (1 to 4)     | -23.2% (-31.3% to -14.5%) |
| 22 | Marshall Islands | Poisoning by carbon monoxide                    | 0 (0 to 0)     | 0 (0 to 0)     | 5.6% (-5.2% to 17.1%)     |
| 23 | Marshall Islands | Poisoning by other means                        | 0 (0 to 0)     | 0 (0 to 0)     | -16.6% (-23.9% to -8.8%)  |
| 24 | Marshall Islands | Pulmonary aspiration and foreign body in airway | 0 (0 to 0)     | 0 (0 to 0)     | 3.3% (-8.9% to 18.1%)     |
| 25 | Marshall Islands | Self-harm by firearm                            | 1 (1 to 2)     | 1 (1 to 2)     | -8.9% (-21% to 4.6%)      |
| 26 | Marshall Islands | Self-harm by other specified means              | 3 (2 to 4)     | 3 (2 to 4)     | 1.3% (-5.5% to 8.8%)      |
| 27 | Marshall Islands | Unintentional firearm injuries                  | 2 (1 to 3)     | 2 (1 to 3)     | -22.7% (-29.1% to -16.3%) |
| 28 | Marshall Islands | Venomous animal contact                         | 3 (1 to 6)     | 3 (1 to 5)     | -9.4% (-14.3% to -3.2%)   |
| 29 | Mauritania       | Adverse effects of medical treatment            | 0 (0 to 0)     | 0 (0 to 0)     | 0% (0% to 0%)             |
| 30 | Mauritania       | Conflict and terrorism                          | 7 (2 to 17)    | 0 (0 to 0)     | NA                        |
| 31 | Mauritania       | Cyclist road injuries                           | 28 (17 to 43)  | 27 (17 to 40)  | -4.8% (-12.4% to 3.8%)    |
| 32 | Mauritania       | Drowning                                        | 0 (0 to 0)     | 0 (0 to 0)     | 0.8% (-7.8% to 11.3%)     |
| 33 | Mauritania       | Environmental heat and cold exposure            | 0 (0 to 1)     | 0 (0 to 1)     | -5.3% (-10.8% to 0.4%)    |
| 34 | Mauritania       | Executions and police conflict                  | 0 (0 to 0)     | 0 (0 to 0)     | NA                        |
| 35 | Mauritania       | Exposure to forces of nature                    | 0 (0 to 0)     | 0 (0 to 0)     | NA                        |
| 36 | Mauritania       | Falls                                           | 17 (11 to 26)  | 20 (13 to 30)  | 16.3% (11.6% to 20.9%)    |
| 37 | Mauritania       | Fire, heat, and hot substances                  | 0 (0 to 0)     | 0 (0 to 0)     | -9.5% (-15.2% to -3.8%)   |
| 38 | Mauritania       | Foreign body in eyes                            | 0 (0 to 0)     | 0 (0 to 0)     | 0.5% (0% to 1.4%)         |
| 39 | Mauritania       | Foreign body in other body part                 | 4 (1 to 8)     | 3 (1 to 7)     | -2.5% (-8.2% to 3.1%)     |
| 40 | Mauritania       | Motor vehicle road injuries                     | 89 (62 to 125) | 79 (56 to 109) | -11.2% (-17.4% to -4.2%)  |
| 41 | Mauritania       | Motorcyclist road injuries                      | 35 (25 to 48)  | 29 (20 to 40)  | -17.2% (-23.6% to -10.4%) |
| 42 | Mauritania       | Non-venomous animal contact                     | 3 (1 to 6)     | 3 (1 to 5)     | -9.1% (-14% to -4.5%)     |
| 43 | Mauritania       | Other exposure to mechanical forces             | 27 (13 to 49)  | 24 (12 to 44)  | -11.1% (-16.9% to -4.4%)  |
| 44 | Mauritania       | Other road injuries                             | 2 (1 to 5)     | 2 (1 to 4)     | -5.8% (-14.9% to 4.5%)    |
| 45 |                  |                                                 |                |                |                           |
| 46 |                  |                                                 |                |                |                           |

|    |            |                                                 |               |               |                           |
|----|------------|-------------------------------------------------|---------------|---------------|---------------------------|
| 1  |            |                                                 |               |               |                           |
| 2  | Mauritania | Other transport injuries                        | 3 (2 to 4)    | 3 (2 to 4)    | -14.2% (-21.7% to -7.7%)  |
| 3  | Mauritania | Other unintentional injuries                    | 3 (2 to 5)    | 2 (1 to 4)    | -15.7% (-21.3% to -9.6%)  |
| 4  | Mauritania | Pedestrian road injuries                        | 73 (52 to 99) | 59 (42 to 79) | -20.1% (-25.6% to -14.4%) |
| 5  | Mauritania | Physical violence by firearm                    | 0 (0 to 0)    | 0 (0 to 0)    | 51.7% (29.3% to 77.3%)    |
| 6  | Mauritania | Physical violence by other means                | 8 (6 to 13)   | 8 (6 to 13)   | 1.1% (-4.1% to 6.3%)      |
| 7  | Mauritania | Physical violence by sharp object               | 2 (1 to 4)    | 2 (1 to 4)    | 3.3% (-4.6% to 11.6%)     |
| 8  | Mauritania | Poisoning by carbon monoxide                    | 0 (0 to 0)    | 0 (0 to 0)    | 20.9% (9.7% to 33.8%)     |
| 9  | Mauritania | Poisoning by other means                        | 0 (0 to 0)    | 0 (0 to 0)    | -16.7% (-24% to -9.2%)    |
| 10 | Mauritania | Pulmonary aspiration and foreign body in airway | 0 (0 to 0)    | 0 (0 to 0)    | -1.2% (-9.3% to 7.7%)     |
| 11 | Mauritania | Self-harm by firearm                            | 0 (0 to 0)    | 0 (0 to 0)    | 2.6% (-4.1% to 10.6%)     |
| 12 | Mauritania | Self-harm by other specified means              | 0 (0 to 0)    | 0 (0 to 0)    | -6.9% (-13.1% to -0.7%)   |
| 13 | Mauritania | Unintentional firearm injuries                  | 1 (0 to 2)    | 1 (0 to 2)    | -15.2% (-23.5% to -5.8%)  |
| 14 | Mauritania | Venomous animal contact                         | 0 (0 to 1)    | 0 (0 to 1)    | -9.1% (-16% to -2.8%)     |
| 15 | Mauritius  | Adverse effects of medical treatment            | 0 (0 to 0)    | 0 (0 to 0)    | 0% (0% to 0%)             |
| 16 | Mauritius  | Conflict and terrorism                          | 0 (0 to 0)    | 0 (0 to 0)    | NA                        |
| 17 | Mauritius  | Cyclist road injuries                           | 8 (5 to 13)   | 9 (5 to 15)   | 11% (-3.6% to 26.8%)      |
| 18 | Mauritius  | Drowning                                        | 0 (0 to 0)    | 0 (0 to 0)    | 10.1% (0.9% to 20.3%)     |
| 19 | Mauritius  | Environmental heat and cold exposure            | 0 (0 to 0)    | 0 (0 to 0)    | 1.8% (-3.2% to 7%)        |
| 20 | Mauritius  | Executions and police conflict                  | 0 (0 to 0)    | 0 (0 to 0)    | NA                        |
| 21 | Mauritius  | Exposure to forces of nature                    | 0 (0 to 0)    | 0 (0 to 0)    | NA                        |
| 22 | Mauritius  | Falls                                           | 24 (15 to 37) | 39 (25 to 60) | 66.4% (57.8% to 76%)      |
| 23 | Mauritius  | Fire, heat, and hot substances                  | 1 (0 to 1)    | 0 (0 to 1)    | -53.3% (-58.3% to -48%)   |
| 24 | Mauritius  | Foreign body in eyes                            | 0 (0 to 0)    | 0 (0 to 0)    | 0.3% (0% to 0.7%)         |
| 25 | Mauritius  | Foreign body in other body part                 | 1 (0 to 2)    | 1 (0 to 2)    | 2.4% (-1.9% to 7%)        |
| 26 | Mauritius  | Motor vehicle road injuries                     | 36 (25 to 51) | 28 (18 to 42) | -23.7% (-33.5% to -13.4%) |
| 27 | Mauritius  | Motorcyclist road injuries                      | 38 (28 to 51) | 53 (40 to 67) | 37.6% (21.8% to 57%)      |
| 28 | Mauritius  | Non-venomous animal contact                     | 2 (1 to 4)    | 2 (1 to 4)    | -18.9% (-22.7% to -15.1%) |
| 29 | Mauritius  | Other exposure to mechanical forces             | 25 (12 to 47) | 26 (12 to 49) | 3.8% (-0.7% to 9%)        |
| 30 | Mauritius  | Other road injuries                             | 1 (1 to 3)    | 1 (1 to 3)    | 12.3% (-2.7% to 27.5%)    |
| 31 | Mauritius  | Other transport injuries                        | 2 (2 to 4)    | 3 (2 to 5)    | 22.4% (9.7% to 37.2%)     |
| 32 | Mauritius  | Other unintentional injuries                    | 3 (2 to 6)    | 3 (2 to 5)    | -4.9% (-12.4% to 2.1%)    |
| 33 | Mauritius  | Pedestrian road injuries                        | 21 (14 to 28) | 15 (10 to 21) | -27.8% (-36% to -18.2%)   |
| 34 | Mauritius  | Physical violence by firearm                    | 0 (0 to 0)    | 0 (0 to 0)    | 43.2% (28.7% to 60.5%)    |
| 35 | Mauritius  | Physical violence by other means                | 15 (10 to 23) | 17 (11 to 25) | 11% (3.4% to 18.8%)       |
| 36 | Mauritius  | Physical violence by sharp object               | 2 (1 to 4)    | 3 (1 to 5)    | 26.1% (12.2% to 44.6%)    |
| 37 | Mauritius  | Poisoning by carbon monoxide                    | 0 (0 to 0)    | 0 (0 to 0)    | 30.3% (19.4% to 47.6%)    |
| 38 | Mauritius  | Poisoning by other means                        | 0 (0 to 0)    | 0 (0 to 0)    | -1.3% (-6.5% to 4.4%)     |
| 39 | Mauritius  | Pulmonary aspiration and foreign body in airway | 0 (0 to 0)    | 0 (0 to 0)    | 2.1% (-8.2% to 14.8%)     |
| 40 | Mauritius  | Self-harm by firearm                            | 0 (0 to 0)    | 0 (0 to 0)    | -10.1% (-22.9% to 6.7%)   |
| 41 | Mauritius  | Self-harm by other specified means              | 0 (0 to 1)    | 0 (0 to 1)    | -22.5% (-27.9% to -16.6%) |
| 42 | Mauritius  | Unintentional firearm injuries                  | 1 (0 to 2)    | 1 (0 to 2)    | 5.3% (-2.3% to 13.6%)     |
| 43 | Mauritius  | Venomous animal contact                         | 0 (0 to 1)    | 0 (0 to 1)    | -17% (-23.1% to -9.3%)    |
| 44 | Mexico     | Adverse effects of medical treatment            | 0 (0 to 0)    | 0 (0 to 0)    | 0% (0% to 0%)             |
| 45 |            |                                                 |               |               |                           |
| 46 |            |                                                 |               |               |                           |

|    |                                  |                                                 |                |                |                           |
|----|----------------------------------|-------------------------------------------------|----------------|----------------|---------------------------|
| 1  |                                  |                                                 |                |                |                           |
| 2  | Mexico                           | Conflict and terrorism                          | 0 (0 to 0)     | 0 (0 to 0)     | NA                        |
| 3  | Mexico                           | Cyclist road injuries                           | 14 (8 to 22)   | 12 (7 to 18)   | -15.2% (-19.8% to -9.9%)  |
| 4  | Mexico                           | Drowning                                        | 0 (0 to 0)     | 0 (0 to 0)     | -43.3% (-47% to -39.7%)   |
| 5  | Mexico                           | Environmental heat and cold exposure            | 1 (0 to 2)     | 1 (0 to 1)     | -29.3% (-35.8% to -23.9%) |
| 6  | Mexico                           | Executions and police conflict                  | 0 (0 to 0)     | 0 (0 to 0)     | NA                        |
| 7  | Mexico                           | Exposure to forces of nature                    | 0 (0 to 1)     | 0 (0 to 0)     | NA                        |
| 8  | Mexico                           | Falls                                           | 77 (49 to 116) | 63 (40 to 95)  | -18% (-20.1% to -15.4%)   |
| 9  | Mexico                           | Fire, heat, and hot substances                  | 1 (0 to 1)     | 1 (0 to 1)     | -22% (-26.7% to -17.9%)   |
| 10 | Mexico                           | Foreign body in eyes                            | 0 (0 to 0)     | 0 (0 to 0)     | -0.3% (-0.8% to 0%)       |
| 11 | Mexico                           | Foreign body in other body part                 | 1 (1 to 3)     | 1 (1 to 3)     | -0.1% (-2.4% to 1.6%)     |
| 12 | Mexico                           | Motor vehicle road injuries                     | 40 (27 to 57)  | 39 (27 to 54)  | -3.7% (-7.3% to 0.3%)     |
| 13 | Mexico                           | Motorcyclist road injuries                      | 14 (9 to 21)   | 14 (10 to 21)  | 1% (-4.7% to 7.9%)        |
| 14 | Mexico                           | Non-venomous animal contact                     | 4 (2 to 8)     | 3 (1 to 7)     | -18.7% (-22.6% to -15%)   |
| 15 | Mexico                           | Other exposure to mechanical forces             | 77 (38 to 139) | 60 (30 to 111) | -21.7% (-25.8% to -16.8%) |
| 16 | Mexico                           | Other road injuries                             | 11 (6 to 19)   | 10 (5 to 17)   | -10.5% (-15.2% to -5.4%)  |
| 17 | Mexico                           | Other transport injuries                        | 3 (2 to 4)     | 2 (1 to 4)     | -12% (-16.3% to -8.1%)    |
| 18 | Mexico                           | Other unintentional injuries                    | 5 (3 to 9)     | 3 (2 to 6)     | -28.5% (-33.9% to -23.5%) |
| 19 | Mexico                           | Pedestrian road injuries                        | 34 (24 to 47)  | 22 (15 to 30)  | -37% (-40.1% to -34%)     |
| 20 | Mexico                           | Physical violence by firearm                    | 1 (1 to 2)     | 3 (1 to 5)     | 99.6% (82.6% to 117.9%)   |
| 21 | Mexico                           | Physical violence by other means                | 25 (16 to 38)  | 26 (16 to 40)  | 3.8% (-2.1% to 8.7%)      |
| 22 | Mexico                           | Physical violence by sharp object               | 6 (3 to 11)    | 7 (3 to 13)    | 21.8% (14.8% to 28.9%)    |
| 23 | Mexico                           | Poisoning by carbon monoxide                    | 0 (0 to 0)     | 0 (0 to 0)     | 1.1% (-14.8% to 13.3%)    |
| 24 | Mexico                           | Poisoning by other means                        | 0 (0 to 0)     | 0 (0 to 0)     | -11.9% (-19.6% to -5.1%)  |
| 25 | Mexico                           | Pulmonary aspiration and foreign body in airway | 0 (0 to 0)     | 0 (0 to 0)     | -44% (-48.6% to -39.7%)   |
| 26 | Mexico                           | Self-harm by firearm                            | 0 (0 to 0)     | 0 (0 to 0)     | 36.7% (26% to 45.6%)      |
| 27 | Mexico                           | Self-harm by other specified means              | 0 (0 to 0)     | 0 (0 to 0)     | 100.9% (88.3% to 117.5%)  |
| 28 | Mexico                           | Unintentional firearm injuries                  | 2 (1 to 5)     | 1 (1 to 3)     | -44.8% (-50% to -39.7%)   |
| 29 | Mexico                           | Venomous animal contact                         | 3 (1 to 6)     | 2 (1 to 5)     | -24.2% (-29.5% to -20.1%) |
| 30 | Micronesia (Federated States of) | Adverse effects of medical treatment            | 0 (0 to 0)     | 0 (0 to 0)     | 0% (0% to 0%)             |
| 31 | Micronesia (Federated States of) | Conflict and terrorism                          | 0 (0 to 0)     | 0 (0 to 0)     | NA                        |
| 32 | Micronesia (Federated States of) | Cyclist road injuries                           | 12 (8 to 17)   | 12 (8 to 16)   | -5.3% (-12.4% to 2.3%)    |
| 33 | Micronesia (Federated States of) | Drowning                                        | 1 (0 to 1)     | 1 (0 to 1)     | 4% (-6.2% to 16.2%)       |
| 34 | Micronesia (Federated States of) | Environmental heat and cold exposure            | 3 (2 to 4)     | 2 (2 to 4)     | -5% (-11.6% to 1.3%)      |
| 35 | Micronesia (Federated States of) | Executions and police conflict                  | 0 (0 to 0)     | 0 (0 to 0)     | NA                        |
| 36 | Micronesia (Federated States of) | Exposure to forces of nature                    | 0 (0 to 0)     | 0 (0 to 0)     | NA                        |
| 37 | Micronesia (Federated States of) | Falls                                           | 47 (37 to 61)  | 73 (57 to 94)  | 54.4% (48.4% to 59.9%)    |
| 38 | Micronesia (Federated States of) | Fire, heat, and hot substances                  | 1 (1 to 2)     | 1 (1 to 2)     | -0.6% (-7.6% to 7%)       |
| 39 | Micronesia (Federated States of) | Foreign body in eyes                            | 0 (0 to 0)     | 0 (0 to 0)     | -0.8% (-1.5% to -0.3%)    |
| 40 | Micronesia (Federated States of) | Foreign body in other body part                 | 1 (0 to 1)     | 1 (0 to 1)     | -2.9% (-7.2% to 1.9%)     |
| 41 | Micronesia (Federated States of) | Motor vehicle road injuries                     | 44 (34 to 55)  | 41 (32 to 51)  | -7.6% (-13.8% to -1.2%)   |
| 42 | Micronesia (Federated States of) | Motorcyclist road injuries                      | 14 (10 to 18)  | 14 (11 to 19)  | 6.2% (-3.6% to 16%)       |
| 43 | Micronesia (Federated States of) | Non-venomous animal contact                     | 5 (3 to 9)     | 4 (2 to 8)     | -13.1% (-17.7% to -8.9%)  |
| 44 | Micronesia (Federated States of) | Other exposure to mechanical forces             | 13 (8 to 21)   | 11 (6 to 18)   | -16% (-21.2% to -11%)     |
| 45 |                                  |                                                 |                |                |                           |
| 46 |                                  |                                                 |                |                |                           |



|    |                                  |                                                 |                |                 |                           |
|----|----------------------------------|-------------------------------------------------|----------------|-----------------|---------------------------|
| 1  |                                  |                                                 |                |                 |                           |
| 2  | Micronesia (Federated States of) | Other road injuries                             | 1 (1 to 2)     | 1 (1 to 2)      | -6.9% (-16.1% to 2.4%)    |
| 3  | Micronesia (Federated States of) | Other transport injuries                        | 8 (6 to 10)    | 7 (5 to 9)      | -7.7% (-12.6% to -2.3%)   |
| 4  | Micronesia (Federated States of) | Other unintentional injuries                    | 7 (5 to 11)    | 6 (4 to 10)     | -8.1% (-12.3% to -3.5%)   |
| 5  | Micronesia (Federated States of) | Pedestrian road injuries                        | 9 (7 to 12)    | 8 (6 to 10)     | -11.8% (-19.3% to -4.3%)  |
| 6  | Micronesia (Federated States of) | Physical violence by firearm                    | 0 (0 to 0)     | 0 (0 to 0)      | 3.8% (-9.8% to 19.8%)     |
| 7  | Micronesia (Federated States of) | Physical violence by other means                | 34 (24 to 48)  | 34 (24 to 48)   | -0.2% (-6.3% to 6.3%)     |
| 8  | Micronesia (Federated States of) | Physical violence by sharp object               | 3 (2 to 4)     | 2 (1 to 4)      | -15.7% (-24.3% to -6.4%)  |
| 9  | Micronesia (Federated States of) | Poisoning by carbon monoxide                    | 0 (0 to 0)     | 0 (0 to 0)      | 11.7% (0.4% to 24%)       |
| 10 | Micronesia (Federated States of) | Poisoning by other means                        | 0 (0 to 0)     | 0 (0 to 0)      | -19.3% (-27% to -11.7%)   |
| 11 | Micronesia (Federated States of) | Pulmonary aspiration and foreign body in airway | 0 (0 to 0)     | 0 (0 to 0)      | -6.7% (-17.6% to 5.4%)    |
| 12 | Micronesia (Federated States of) | Self-harm by firearm                            | 1 (1 to 2)     | 1 (1 to 2)      | -5% (-18.1% to 9.7%)      |
| 13 | Micronesia (Federated States of) | Self-harm by other specified means              | 3 (2 to 5)     | 3 (2 to 5)      | 2.9% (-4.1% to 11.4%)     |
| 14 | Micronesia (Federated States of) | Unintentional firearm injuries                  | 2 (1 to 3)     | 2 (1 to 3)      | -26.7% (-33.7% to -20.1%) |
| 15 | Monaco                           | Venomous animal contact                         | 3 (1 to 6)     | 3 (1 to 5)      | -7.8% (-12.7% to -2.1%)   |
| 16 | Monaco                           | Adverse effects of medical treatment            | 0 (0 to 0)     | 0 (0 to 0)      | 0% (0% to 0%)             |
| 17 | Monaco                           | Conflict and terrorism                          | 0 (0 to 0)     | 0 (0 to 0)      | NA                        |
| 18 | Monaco                           | Cyclist road injuries                           | 18 (11 to 27)  | 15 (10 to 23)   | -16.4% (-24.4% to -7.5%)  |
| 19 | Monaco                           | Drowning                                        | 0 (0 to 0)     | 0 (0 to 0)      | 75.9% (59.5% to 93.1%)    |
| 20 | Monaco                           | Environmental heat and cold exposure            | 0 (0 to 1)     | 0 (0 to 1)      | 2% (-3% to 6.8%)          |
| 21 | Monaco                           | Executions and police conflict                  | 0 (0 to 0)     | 0 (0 to 0)      | NA                        |
| 22 | Monaco                           | Exposure to forces of nature                    | 0 (0 to 0)     | 0 (0 to 0)      | NA                        |
| 23 | Monaco                           | Falls                                           | 96 (60 to 150) | 117 (73 to 183) | 22.5% (18.3% to 26.9%)    |
| 24 | Monaco                           | Fire, heat, and hot substances                  | 0 (0 to 1)     | 0 (0 to 1)      | 1.4% (-3.2% to 5.6%)      |
| 25 | Monaco                           | Foreign body in eyes                            | 0 (0 to 0)     | 0 (0 to 0)      | 0.3% (0% to 1%)           |
| 26 | Monaco                           | Foreign body in other body part                 | 2 (1 to 4)     | 2 (1 to 4)      | 0.9% (-3.2% to 5.4%)      |
| 27 | Monaco                           | Motor vehicle road injuries                     | 34 (23 to 48)  | 29 (20 to 42)   | -13.4% (-20.7% to -6.1%)  |
| 28 | Monaco                           | Motorcyclist road injuries                      | 18 (12 to 25)  | 17 (12 to 23)   | -5% (-13.9% to 4.6%)      |
| 29 | Monaco                           | Non-venomous animal contact                     | 1 (0 to 2)     | 1 (0 to 2)      | -9.8% (-13.7% to -4.6%)   |
| 30 | Monaco                           | Other exposure to mechanical forces             | 66 (33 to 124) | 67 (33 to 124)  | 1.4% (-3.9% to 6.7%)      |
| 31 | Monaco                           | Other road injuries                             | 2 (1 to 4)     | 2 (1 to 3)      | -16.7% (-24.2% to -8.3%)  |
| 32 | Monaco                           | Other transport injuries                        | 2 (2 to 3)     | 3 (2 to 4)      | 7.8% (3.2% to 12.9%)      |
| 33 | Monaco                           | Other unintentional injuries                    | 7 (4 to 13)    | 7 (4 to 13)     | 1.2% (-3% to 5.4%)        |
| 34 | Monaco                           | Pedestrian road injuries                        | 13 (9 to 19)   | 10 (7 to 14)    | -25% (-32.1% to -17.4%)   |
| 35 | Monaco                           | Physical violence by firearm                    | 0 (0 to 1)     | 1 (0 to 1)      | 28.5% (18.6% to 39.8%)    |
| 36 | Monaco                           | Physical violence by other means                | 12 (7 to 18)   | 12 (8 to 19)    | 5.1% (0.1% to 10.8%)      |
| 37 | Monaco                           | Physical violence by sharp object               | 1 (0 to 2)     | 1 (0 to 2)      | 4.5% (-3.5% to 13%)       |
| 38 | Monaco                           | Poisoning by carbon monoxide                    | 0 (0 to 0)     | 0 (0 to 0)      | -6.8% (-15.5% to 2.1%)    |
| 39 | Monaco                           | Poisoning by other means                        | 0 (0 to 0)     | 0 (0 to 0)      | -34.2% (-40.4% to -28.4%) |
| 40 | Monaco                           | Pulmonary aspiration and foreign body in airway | 0 (0 to 1)     | 0 (0 to 0)      | -16% (-23.1% to -8.1%)    |
| 41 | Monaco                           | Self-harm by firearm                            | 0 (0 to 0)     | 0 (0 to 0)      | 0.7% (-5.5% to 8.8%)      |
| 42 | Monaco                           | Self-harm by other specified means              | 0 (0 to 1)     | 0 (0 to 1)      | -5.9% (-11.4% to 0.3%)    |
| 43 | Monaco                           | Unintentional firearm injuries                  | 0 (0 to 1)     | 0 (0 to 1)      | 2.2% (-5% to 10.2%)       |
| 44 | Monaco                           | Venomous animal contact                         | 0 (0 to 0)     | 0 (0 to 0)      | -10.9% (-16.7% to -4.7%)  |
| 45 |                                  |                                                 |                |                 |                           |
| 46 |                                  |                                                 |                |                 |                           |

|    |            |                                                 |                  |                  |                           |
|----|------------|-------------------------------------------------|------------------|------------------|---------------------------|
| 1  |            |                                                 |                  |                  |                           |
| 2  | Mongolia   | Adverse effects of medical treatment            | 0 (0 to 0)       | 0 (0 to 0)       | 0% (0% to 0%)             |
| 3  | Mongolia   | Conflict and terrorism                          | 0 (0 to 0)       | 0 (0 to 0)       | NA                        |
| 4  | Mongolia   | Cyclist road injuries                           | 22 (13 to 27)    | 22 (14 to 31)    | 10.4% (0.6% to 19.9%)     |
| 5  | Mongolia   | Drowning                                        | 0 (0 to 1)       | 1 (0 to 1)       | 29.8% (15.3% to 47.3%)    |
| 6  | Mongolia   | Environmental heat and cold exposure            | 11 (8 to 15)     | 7 (5 to 10)      | -34.4% (-38.1% to -30.7%) |
| 7  | Mongolia   | Executions and police conflict                  | 0 (0 to 0)       | 0 (0 to 0)       | NA                        |
| 8  | Mongolia   | Exposure to forces of nature                    | 7 (4 to 12)      | 0 (0 to 0)       | NA                        |
| 9  | Mongolia   | Falls                                           | 129 (99 to 168)  | 174 (134 to 228) | 34.8% (29.5% to 40.3%)    |
| 10 | Mongolia   | Fire, heat, and hot substances                  | 3 (2 to 5)       | 4 (2 to 6)       | 10.8% (3.6% to 17.8%)     |
| 11 | Mongolia   | Foreign body in eyes                            | 0 (0 to 0)       | 0 (0 to 0)       | -0.5% (-1.1% to -0.2%)    |
| 12 | Mongolia   | Foreign body in other body part                 | 2 (1 to 4)       | 2 (1 to 4)       | 1.5% (-3.8% to 8.5%)      |
| 13 | Mongolia   | Motor vehicle road injuries                     | 47 (37 to 60)    | 74 (58 to 94)    | 56.7% (45.9% to 69.9%)    |
| 14 | Mongolia   | Motorcyclist road injuries                      | 11 (8 to 14)     | 12 (9 to 16)     | 15.8% (4.3% to 30%)       |
| 15 | Mongolia   | Non-venomous animal contact                     | 3 (2 to 5)       | 2 (1 to 4)       | -22.1% (-27.7% to -16.7%) |
| 16 | Mongolia   | Other exposure to mechanical forces             | 68 (43 to 107)   | 71 (44 to 109)   | 4.3% (-2.3% to 10.8%)     |
| 17 | Mongolia   | Other road injuries                             | 2 (1 to 4)       | 3 (2 to 5)       | 29.9% (16.8% to 46.6%)    |
| 18 | Mongolia   | Other transport injuries                        | 5 (4 to 7)       | 5 (4 to 7)       | 0.5% (-5.7% to 6.3%)      |
| 19 | Mongolia   | Other unintentional injuries                    | 19 (12 to 31)    | 20 (13 to 33)    | 6.3% (0.9% to 12.4%)      |
| 20 | Mongolia   | Pedestrian road injuries                        | 19 (14 to 24)    | 22 (17 to 29)    | 21.1% (10.6% to 33.5%)    |
| 21 | Mongolia   | Physical violence by firearm                    | 0 (0 to 0)       | 0 (0 to 0)       | 71.7% (46.5% to 99.4%)    |
| 22 | Mongolia   | Physical violence by other means                | 24 (17 to 34)    | 20 (14 to 29)    | -15.1% (-22% to -7.9%)    |
| 23 | Mongolia   | Physical violence by sharp object               | 3 (2 to 4)       | 2 (1 to 4)       | -18.8% (-28.1% to -9.1%)  |
| 24 | Mongolia   | Poisoning by carbon monoxide                    | 0 (0 to 0)       | 0 (0 to 0)       | -19% (-33% to -1.2%)      |
| 25 | Mongolia   | Poisoning by other means                        | 1 (1 to 1)       | 0 (0 to 1)       | -59.3% (-65.5% to -52.6%) |
| 26 | Mongolia   | Pulmonary aspiration and foreign body in airway | 1 (1 to 2)       | 1 (1 to 2)       | 0.5% (-6.2% to 8.6%)      |
| 27 | Mongolia   | Self-harm by firearm                            | 0 (0 to 0)       | 0 (0 to 1)       | 24% (3.7% to 46.1%)       |
| 28 | Mongolia   | Self-harm by other specified means              | 3 (2 to 5)       | 4 (3 to 6)       | 15.2% (8.5% to 22.2%)     |
| 29 | Mongolia   | Unintentional firearm injuries                  | 1 (0 to 1)       | 1 (0 to 1)       | -9% (-17.9% to 1.3%)      |
| 30 | Mongolia   | Venomous animal contact                         | 3 (1 to 5)       | 2 (1 to 4)       | -19% (-24% to -14.1%)     |
| 31 | Montenegro | Adverse effects of medical treatment            | 0 (0 to 0)       | 0 (0 to 0)       | 0% (0% to 0%)             |
| 32 | Montenegro | Conflict and terrorism                          | 0 (0 to 0)       | 0 (0 to 0)       | NA                        |
| 33 | Montenegro | Cyclist road injuries                           | 68 (50 to 91)    | 65 (47 to 87)    | -4.9% (-12.8% to 2.8%)    |
| 34 | Montenegro | Drowning                                        | 0 (0 to 0)       | 0 (0 to 1)       | 40.6% (25.1% to 57.4%)    |
| 35 | Montenegro | Environmental heat and cold exposure            | 2 (1 to 3)       | 2 (1 to 2)       | -14.7% (-19.6% to -9.6%)  |
| 36 | Montenegro | Executions and police conflict                  | 0 (0 to 0)       | 0 (0 to 0)       | NA                        |
| 37 | Montenegro | Exposure to forces of nature                    | 0 (0 to 0)       | 0 (0 to 0)       | NA                        |
| 38 | Montenegro | Falls                                           | 270 (211 to 347) | 282 (220 to 365) | 4.3% (-0.5% to 9.7%)      |
| 39 | Montenegro | Fire, heat, and hot substances                  | 5 (3 to 8)       | 4 (2 to 7)       | -11.6% (-16.9% to -6.1%)  |
| 40 | Montenegro | Foreign body in eyes                            | 0 (0 to 0)       | 0 (0 to 0)       | 0.3% (0.1% to 0.7%)       |
| 41 | Montenegro | Foreign body in other body part                 | 2 (1 to 5)       | 2 (1 to 5)       | -1.7% (-6.5% to 3.5%)     |
| 42 | Montenegro | Motor vehicle road injuries                     | 86 (66 to 110)   | 94 (72 to 120)   | 9.2% (0.8% to 19.4%)      |
| 43 | Montenegro | Motorcyclist road injuries                      | 16 (12 to 21)    | 15 (11 to 20)    | -3.9% (-14.3% to 7.6%)    |
| 44 | Montenegro | Non-venomous animal contact                     | 6 (3 to 10)      | 5 (3 to 9)       | -5.6% (-10.5% to -0.9%)   |
| 45 |            |                                                 |                  |                  |                           |
| 46 |            |                                                 |                  |                  |                           |

|    |            |                                                 |                 |                 |                           |
|----|------------|-------------------------------------------------|-----------------|-----------------|---------------------------|
| 1  |            |                                                 |                 |                 |                           |
| 2  | Montenegro | Other exposure to mechanical forces             | 134 (83 to 213) | 131 (80 to 207) | -2.3% (-7.6% to 2.6%)     |
| 3  | Montenegro | Other road injuries                             | 2 (1 to 3)      | 2 (1 to 3)      | 0.1% (-8.8% to 9.4%)      |
| 4  | Montenegro | Other transport injuries                        | 7 (5 to 9)      | 6 (4 to 8)      | -11.4% (-17.4% to -5.5%)  |
| 5  | Montenegro | Other unintentional injuries                    | 35 (22 to 56)   | 29 (18 to 48)   | -15.5% (-22% to -8.2%)    |
| 6  | Montenegro | Pedestrian road injuries                        | 48 (37 to 61)   | 43 (32 to 54)   | -11% (-18% to -3.4%)      |
| 7  | Montenegro | Physical violence by firearm                    | 0 (0 to 1)      | 1 (0 to 1)      | 11.3% (-0.2% to 25.5%)    |
| 8  | Montenegro | Physical violence by other means                | 41 (30 to 58)   | 33 (23 to 47)   | -19.5% (-25.4% to -13%)   |
| 9  | Montenegro | Physical violence by sharp object               | 2 (1 to 4)      | 2 (1 to 3)      | -6.8% (-16.3% to 3%)      |
| 10 | Montenegro | Poisoning by carbon monoxide                    | 0 (0 to 0)      | 0 (0 to 0)      | 18.2% (9.6% to 27.8%)     |
| 11 | Montenegro | Poisoning by other means                        | 0 (0 to 1)      | 0 (0 to 1)      | 1.8% (-4.9% to 9.2%)      |
| 12 | Montenegro | Pulmonary aspiration and foreign body in airway | 1 (1 to 2)      | 1 (1 to 2)      | -19% (-28.6% to -10%)     |
| 13 | Montenegro | Self-harm by firearm                            | 1 (1 to 2)      | 1 (1 to 2)      | 9.3% (-1.5% to 22.2%)     |
| 14 | Montenegro | Self-harm by other specified means              | 3 (2 to 5)      | 3 (2 to 5)      | -5% (-10.7% to 0.4%)      |
| 15 | Montenegro | Unintentional firearm injuries                  | 1 (1 to 2)      | 1 (1 to 2)      | -2.8% (-11.1% to 6.7%)    |
| 16 | Morocco    | Venomous animal contact                         | 5 (2 to 9)      | 4 (2 to 9)      | -8.1% (-13.4% to -3.3%)   |
| 17 | Morocco    | Adverse effects of medical treatment            | 0 (0 to 0)      | 0 (0 to 0)      | 0% (0% to 0%)             |
| 18 | Morocco    | Conflict and terrorism                          | 0 (0 to 0)      | 0 (0 to 0)      | NA                        |
| 19 | Morocco    | Cyclist road injuries                           | 16 (11 to 23)   | 16 (11 to 23)   | 2.5% (-7.4% to 12.9%)     |
| 20 | Morocco    | Drowning                                        | 0 (0 to 0)      | 0 (0 to 0)      | 44.5% (26.5% to 64.2%)    |
| 21 | Morocco    | Environmental heat and cold exposure            | 3 (2 to 4)      | 3 (2 to 4)      | -2% (-6.2% to 2.2%)       |
| 22 | Morocco    | Executions and police conflict                  | 0 (0 to 0)      | 0 (0 to 0)      | NA                        |
| 23 | Morocco    | Exposure to forces of nature                    | 0 (0 to 0)      | 0 (0 to 0)      | NA                        |
| 24 | Morocco    | Falls                                           | 80 (63 to 105)  | 109 (84 to 143) | 35.3% (30% to 41.3%)      |
| 25 | Morocco    | Fire, heat, and hot substances                  | 1 (1 to 2)      | 1 (0 to 1)      | -25.9% (-31.5% to -19.7%) |
| 26 | Morocco    | Foreign body in eyes                            | 0 (0 to 0)      | 0 (0 to 0)      | 0.4% (0.2% to 0.8%)       |
| 27 | Morocco    | Foreign body in other body part                 | 1 (1 to 3)      | 1 (1 to 3)      | -0.9% (-5.5% to 4.4%)     |
| 28 | Morocco    | Motor vehicle road injuries                     | 50 (39 to 63)   | 44 (35 to 56)   | -10.8% (-18.5% to -2.3%)  |
| 29 | Morocco    | Motorcyclist road injuries                      | 9 (7 to 13)     | 9 (7 to 12)     | -4.3% (-13.9% to 7%)      |
| 30 | Morocco    | Non-venomous animal contact                     | 4 (2 to 7)      | 4 (2 to 6)      | -10.8% (-15.5% to -5.8%)  |
| 31 | Morocco    | Other exposure to mechanical forces             | 33 (20 to 53)   | 30 (18 to 47)   | -9% (-14.7% to -4%)       |
| 32 | Morocco    | Other road injuries                             | 2 (1 to 3)      | 2 (1 to 4)      | 11.4% (0.6% to 23.9%)     |
| 33 | Morocco    | Other transport injuries                        | 5 (4 to 7)      | 5 (4 to 7)      | -4.9% (-10.6% to 2.3%)    |
| 34 | Morocco    | Other unintentional injuries                    | 25 (16 to 40)   | 19 (13 to 31)   | -22.2% (-26.4% to -17.8%) |
| 35 | Morocco    | Pedestrian road injuries                        | 34 (26 to 43)   | 25 (19 to 31)   | -27.7% (-34.1% to -20.9%) |
| 36 | Morocco    | Physical violence by firearm                    | 0 (0 to 0)      | 0 (0 to 1)      | 173.4% (140.1% to 214.1%) |
| 37 | Morocco    | Physical violence by other means                | 8 (6 to 12)     | 9 (6 to 13)     | 9.1% (2.6% to 16.8%)      |
| 38 | Morocco    | Physical violence by sharp object               | 1 (1 to 2)      | 1 (1 to 2)      | 9.1% (0.2% to 18.8%)      |
| 39 | Morocco    | Poisoning by carbon monoxide                    | 0 (0 to 0)      | 0 (0 to 0)      | 33.7% (17.4% to 50.3%)    |
| 40 | Morocco    | Poisoning by other means                        | 0 (0 to 0)      | 0 (0 to 0)      | -22.7% (-30.5% to -14.8%) |
| 41 | Morocco    | Pulmonary aspiration and foreign body in airway | 0 (0 to 1)      | 0 (0 to 1)      | -21.4% (-30.6% to -12.8%) |
| 42 | Morocco    | Self-harm by firearm                            | 0 (0 to 0)      | 0 (0 to 0)      | 28.9% (14.4% to 45.2%)    |
| 43 | Morocco    | Self-harm by other specified means              | 1 (1 to 2)      | 1 (1 to 2)      | 4.2% (-0.8% to 9.7%)      |
| 44 | Morocco    | Unintentional firearm injuries                  | 3 (2 to 4)      | 2 (1 to 4)      | -18.6% (-26.7% to -10.9%) |
| 45 |            |                                                 |                 |                 |                           |
| 46 |            |                                                 |                 |                 |                           |

|    |            |                                                 |                |                 |                           |
|----|------------|-------------------------------------------------|----------------|-----------------|---------------------------|
| 1  |            |                                                 |                |                 |                           |
| 2  | Morocco    | Venomous animal contact                         | 2 (1 to 5)     | 2 (1 to 4)      | -8.7% (-14.5% to -1.9%)   |
| 3  | Mozambique | Adverse effects of medical treatment            | 0 (0 to 0)     | 0 (0 to 0)      | 0% (0% to 0%)             |
| 4  | Mozambique | Conflict and terrorism                          | 70 (19 to 200) | 2 (1 to 6)      | NA                        |
| 5  | Mozambique | Cyclist road injuries                           | 39 (25 to 57)  | 47 (31 to 69)   | 21.5% (11.5% to 31.6%)    |
| 6  | Mozambique | Drowning                                        | 0 (0 to 0)     | 0 (0 to 0)      | -8.3% (-14.7% to -1.6%)   |
| 7  | Mozambique | Environmental heat and cold exposure            | 0 (0 to 1)     | 0 (0 to 1)      | 4% (-2.8% to 11.3%)       |
| 8  | Mozambique | Executions and police conflict                  | 0 (0 to 0)     | 0 (0 to 0)      | NA                        |
| 9  | Mozambique | Exposure to forces of nature                    | 0 (0 to 0)     | 5 (2 to 10)     | NA                        |
| 10 | Mozambique | Falls                                           | 26 (17 to 41)  | 34 (22 to 54)   | 30% (24.7% to 35.4%)      |
| 11 | Mozambique | Fire, heat, and hot substances                  | 0 (0 to 1)     | 0 (0 to 1)      | -5.4% (-10.4% to -0.6%)   |
| 12 | Mozambique | Foreign body in eyes                            | 0 (0 to 0)     | 0 (0 to 0)      | -0.5% (-1.4% to -0.1%)    |
| 13 | Mozambique | Foreign body in other body part                 | 3 (1 to 7)     | 3 (1 to 7)      | -4.2% (-9.6% to 2.7%)     |
| 14 | Mozambique | Motor vehicle road injuries                     | 34 (22 to 49)  | 43 (28 to 62)   | 26.2% (14.2% to 38.9%)    |
| 15 | Mozambique | Motorcyclist road injuries                      | 24 (16 to 33)  | 29 (21 to 41)   | 23.7% (14.1% to 34.8%)    |
| 16 | Mozambique | Non-venomous animal contact                     | 7 (3 to 15)    | 6 (3 to 12)     | -16.8% (-21.1% to -12%)   |
| 17 | Mozambique | Other exposure to mechanical forces             | 25 (12 to 46)  | 25 (12 to 46)   | -0.3% (-7% to 6.2%)       |
| 18 | Mozambique | Other road injuries                             | 2 (1 to 4)     | 2 (1 to 4)      | 7.1% (-1.2% to 16.6%)     |
| 19 | Mozambique | Other transport injuries                        | 3 (2 to 5)     | 3 (2 to 5)      | -2.6% (-8.5% to 4.4%)     |
| 20 | Mozambique | Other unintentional injuries                    | 3 (2 to 4)     | 2 (1 to 4)      | -8.4% (-15.1% to -2.2%)   |
| 21 | Mozambique | Pedestrian road injuries                        | 89 (66 to 116) | 103 (76 to 134) | 15.1% (8.1% to 22.8%)     |
| 22 | Mozambique | Physical violence by firearm                    | 0 (0 to 0)     | 0 (0 to 0)      | 66.3% (51.6% to 84.3%)    |
| 23 | Mozambique | Physical violence by other means                | 5 (3 to 7)     | 7 (4 to 10)     | 47% (38.2% to 56.6%)      |
| 24 | Mozambique | Physical violence by sharp object               | 1 (1 to 2)     | 2 (1 to 3)      | 36.6% (25.7% to 49%)      |
| 25 | Mozambique | Poisoning by carbon monoxide                    | 0 (0 to 0)     | 0 (0 to 0)      | 20.3% (6.4% to 37%)       |
| 26 | Mozambique | Poisoning by other means                        | 0 (0 to 0)     | 0 (0 to 0)      | -11.3% (-19.9% to -3.2%)  |
| 27 | Mozambique | Pulmonary aspiration and foreign body in airway | 0 (0 to 0)     | 0 (0 to 0)      | -15.8% (-26.7% to -4.3%)  |
| 28 | Mozambique | Self-harm by firearm                            | 0 (0 to 0)     | 0 (0 to 0)      | 91.3% (74.4% to 113.7%)   |
| 29 | Mozambique | Self-harm by other specified means              | 0 (0 to 0)     | 0 (0 to 0)      | 44.9% (35.5% to 55%)      |
| 30 | Mozambique | Unintentional firearm injuries                  | 1 (0 to 2)     | 1 (0 to 2)      | -15.8% (-23.8% to -5.9%)  |
| 31 | Mozambique | Venomous animal contact                         | 1 (0 to 3)     | 1 (0 to 3)      | -15.5% (-22.3% to -7.6%)  |
| 32 | Myanmar    | Adverse effects of medical treatment            | 0 (0 to 0)     | 0 (0 to 0)      | 0% (0% to 0%)             |
| 33 | Myanmar    | Conflict and terrorism                          | 9 (4 to 20)    | 7 (3 to 15)     | NA                        |
| 34 | Myanmar    | Cyclist road injuries                           | 17 (12 to 25)  | 13 (9 to 19)    | -23.3% (-30% to -15.7%)   |
| 35 | Myanmar    | Drowning                                        | 1 (0 to 1)     | 0 (0 to 1)      | -34% (-40% to -27.5%)     |
| 36 | Myanmar    | Environmental heat and cold exposure            | 1 (1 to 2)     | 2 (1 to 2)      | 3.7% (-2.4% to 8.8%)      |
| 37 | Myanmar    | Executions and police conflict                  | 0 (0 to 0)     | 1 (0 to 1)      | NA                        |
| 38 | Myanmar    | Exposure to forces of nature                    | 0 (0 to 0)     | 0 (0 to 0)      | NA                        |
| 39 | Myanmar    | Falls                                           | 87 (69 to 111) | 115 (91 to 144) | 31.6% (26.3% to 36.9%)    |
| 40 | Myanmar    | Fire, heat, and hot substances                  | 1 (1 to 2)     | 1 (1 to 2)      | -3.9% (-11.5% to 2.2%)    |
| 41 | Myanmar    | Foreign body in eyes                            | 0 (0 to 0)     | 0 (0 to 0)      | -1.5% (-2.3% to -0.9%)    |
| 42 | Myanmar    | Foreign body in other body part                 | 1 (0 to 2)     | 1 (0 to 2)      | -6% (-11.5% to -1.1%)     |
| 43 | Myanmar    | Motor vehicle road injuries                     | 24 (18 to 32)  | 17 (12 to 23)   | -30.2% (-36.5% to -23.4%) |
| 44 | Myanmar    | Motorcyclist road injuries                      | 42 (33 to 53)  | 34 (26 to 43)   | -18.8% (-25.8% to -10.8%) |
| 45 |            |                                                 |                |                 |                           |
| 46 |            |                                                 |                |                 |                           |

|    |         |                                                 |               |               |                           |
|----|---------|-------------------------------------------------|---------------|---------------|---------------------------|
| 1  |         |                                                 |               |               |                           |
| 2  | Myanmar | Non-venomous animal contact                     | 8 (5 to 14)   | 5 (3 to 8)    | -44.6% (-48.5% to -40.7%) |
| 3  | Myanmar | Other exposure to mechanical forces             | 24 (15 to 39) | 20 (12 to 32) | -17.2% (-22.8% to -11.7%) |
| 4  | Myanmar | Other road injuries                             | 1 (1 to 2)    | 1 (0 to 1)    | -15.1% (-23.7% to -5.1%)  |
| 5  | Myanmar | Other transport injuries                        | 5 (4 to 6)    | 4 (3 to 6)    | -11.6% (-21.4% to -2.1%)  |
| 6  | Myanmar | Other unintentional injuries                    | 14 (9 to 23)  | 10 (6 to 17)  | -26.6% (-32.3% to -20.5%) |
| 7  | Myanmar | Pedestrian road injuries                        | 18 (13 to 23) | 10 (8 to 13)  | -44.5% (-49.1% to -39.5%) |
| 8  | Myanmar | Physical violence by firearm                    | 0 (0 to 0)    | 0 (0 to 0)    | -11.1% (-28% to 7.5%)     |
| 9  | Myanmar | Physical violence by other means                | 16 (11 to 22) | 10 (7 to 15)  | -35.7% (-42.6% to -28.9%) |
| 10 | Myanmar | Physical violence by sharp object               | 3 (2 to 5)    | 2 (1 to 3)    | -45.6% (-53.9% to -38.1%) |
| 11 | Myanmar | Poisoning by carbon monoxide                    | 0 (0 to 0)    | 0 (0 to 0)    | -0.2% (-12.8% to 15.6%)   |
| 12 | Myanmar | Poisoning by other means                        | 0 (0 to 0)    | 0 (0 to 0)    | -46.6% (-53% to -40.4%)   |
| 13 | Myanmar | Pulmonary aspiration and foreign body in airway | 0 (0 to 0)    | 0 (0 to 0)    | -41.6% (-47.8% to -34.6%) |
| 14 | Myanmar | Self-harm by firearm                            | 0 (0 to 0)    | 0 (0 to 0)    | -10.1% (-26.2% to 8.6%)   |
| 15 | Myanmar | Self-harm by other specified means              | 1 (1 to 2)    | 1 (1 to 1)    | -26% (-30.5% to -21.4%)   |
| 16 | Myanmar | Unintentional firearm injuries                  | 3 (2 to 4)    | 2 (1 to 3)    | -29.4% (-37.7% to -21.4%) |
| 17 | Myanmar | Venomous animal contact                         | 3 (1 to 6)    | 1 (0 to 3)    | -54.8% (-60.8% to -49.3%) |
| 18 | Namibia | Adverse effects of medical treatment            | 0 (0 to 0)    | 0 (0 to 0)    | 0% (0% to 0%)             |
| 19 | Namibia | Conflict and terrorism                          | 0 (0 to 0)    | 0 (0 to 0)    | NA                        |
| 20 | Namibia | Cyclist road injuries                           | 11 (7 to 17)  | 15 (9 to 24)  | 41% (30.7% to 52.7%)      |
| 21 | Namibia | Drowning                                        | 0 (0 to 0)    | 0 (0 to 0)    | -1.4% (-10.9% to 12.7%)   |
| 22 | Namibia | Environmental heat and cold exposure            | 0 (0 to 1)    | 0 (0 to 1)    | -11.5% (-17.6% to -5.7%)  |
| 23 | Namibia | Executions and police conflict                  | 0 (0 to 0)    | 0 (0 to 0)    | NA                        |
| 24 | Namibia | Exposure to forces of nature                    | 0 (0 to 0)    | 0 (0 to 0)    | NA                        |
| 25 | Namibia | Falls                                           | 18 (12 to 28) | 23 (15 to 35) | 25.9% (21.2% to 31%)      |
| 26 | Namibia | Fire, heat, and hot substances                  | 0 (0 to 0)    | 0 (0 to 0)    | -16.7% (-22.3% to -11.1%) |
| 27 | Namibia | Foreign body in eyes                            | 0 (0 to 0)    | 0 (0 to 0)    | -0.7% (-1.5% to -0.1%)    |
| 28 | Namibia | Foreign body in other body part                 | 4 (2 to 9)    | 4 (2 to 9)    | -3.1% (-8.5% to 2.8%)     |
| 29 | Namibia | Motor vehicle road injuries                     | 41 (28 to 57) | 44 (31 to 61) | 9% (1.2% to 17.8%)        |
| 30 | Namibia | Motorcyclist road injuries                      | 9 (6 to 12)   | 11 (7 to 15)  | 23.8% (12.7% to 35.5%)    |
| 31 | Namibia | Non-venomous animal contact                     | 3 (2 to 7)    | 3 (1 to 6)    | -19% (-23.9% to -13.8%)   |
| 32 | Namibia | Other exposure to mechanical forces             | 32 (16 to 58) | 27 (14 to 49) | -14.5% (-20.3% to -8.3%)  |
| 33 | Namibia | Other road injuries                             | 1 (1 to 3)    | 2 (1 to 3)    | 34.8% (22.3% to 49.9%)    |
| 34 | Namibia | Other transport injuries                        | 3 (2 to 5)    | 3 (2 to 5)    | -0.8% (-8.8% to 6.4%)     |
| 35 | Namibia | Other unintentional injuries                    | 3 (2 to 5)    | 2 (1 to 4)    | -13.6% (-19.5% to -8.4%)  |
| 36 | Namibia | Pedestrian road injuries                        | 50 (36 to 64) | 49 (36 to 64) | -1.5% (-7.8% to 5.4%)     |
| 37 | Namibia | Physical violence by firearm                    | 0 (0 to 1)    | 0 (0 to 1)    | 15.3% (-0.1% to 36.7%)    |
| 38 | Namibia | Physical violence by other means                | 17 (11 to 27) | 18 (11 to 27) | 1.5% (-5.4% to 8.4%)      |
| 39 | Namibia | Physical violence by sharp object               | 5 (3 to 10)   | 6 (3 to 10)   | 5% (-4.8% to 15.2%)       |
| 40 | Namibia | Poisoning by carbon monoxide                    | 0 (0 to 0)    | 0 (0 to 0)    | 23.1% (10.3% to 36.2%)    |
| 41 | Namibia | Poisoning by other means                        | 0 (0 to 0)    | 0 (0 to 0)    | -18.4% (-26.9% to -9%)    |
| 42 | Namibia | Pulmonary aspiration and foreign body in airway | 0 (0 to 0)    | 0 (0 to 0)    | -3.4% (-11.4% to 4.8%)    |
| 43 | Namibia | Self-harm by firearm                            | 0 (0 to 0)    | 0 (0 to 0)    | 48.1% (35.7% to 63.9%)    |
| 44 | Namibia | Self-harm by other specified means              | 0 (0 to 0)    | 0 (0 to 0)    | 26% (16.8% to 34.7%)      |
| 45 |         |                                                 |               |               |                           |
| 46 |         |                                                 |               |               |                           |

|    |         |                                                 |                 |                  |                           |
|----|---------|-------------------------------------------------|-----------------|------------------|---------------------------|
| 1  |         |                                                 |                 |                  |                           |
| 2  | Namibia | Unintentional firearm injuries                  | 1 (0 to 1)      | 0 (0 to 1)       | -13% (-22.9% to -0.3%)    |
| 3  | Namibia | Venomous animal contact                         | 0 (0 to 1)      | 0 (0 to 1)       | -20.9% (-30.3% to -11.6%) |
| 4  | Nauru   | Adverse effects of medical treatment            | 0 (0 to 0)      | 0 (0 to 0)       | 0% (0% to 0%)             |
| 5  | Nauru   | Conflict and terrorism                          | 0 (0 to 0)      | 0 (0 to 0)       | NA                        |
| 6  | Nauru   | Cyclist road injuries                           | 10 (6 to 15)    | 10 (6 to 15)     | 2.9% (-3% to 10.3%)       |
| 7  | Nauru   | Drowning                                        | 0 (0 to 0)      | 0 (0 to 0)       | 23.3% (13.2% to 34.1%)    |
| 8  | Nauru   | Environmental heat and cold exposure            | 0 (0 to 1)      | 0 (0 to 1)       | -4.2% (-9.3% to 1%)       |
| 9  | Nauru   | Executions and police conflict                  | 0 (0 to 0)      | 0 (0 to 0)       | NA                        |
| 10 | Nauru   | Exposure to forces of nature                    | 0 (0 to 0)      | 0 (0 to 0)       | NA                        |
| 11 | Nauru   | Falls                                           | 27 (17 to 42)   | 38 (24 to 59)    | 43.5% (38.4% to 48.7%)    |
| 12 | Nauru   | Fire, heat, and hot substances                  | 0 (0 to 0)      | 0 (0 to 0)       | -2.2% (-7% to 3%)         |
| 13 | Nauru   | Foreign body in eyes                            | 0 (0 to 0)      | 0 (0 to 0)       | -2% (-4% to -0.6%)        |
| 14 | Nauru   | Foreign body in other body part                 | 1 (0 to 2)      | 1 (0 to 2)       | -2.1% (-6.9% to 3.2%)     |
| 15 | Nauru   | Motor vehicle road injuries                     | 40 (28 to 56)   | 36 (25 to 51)    | -10.5% (-16.2% to -4.7%)  |
| 16 | Nauru   | Motorcyclist road injuries                      | 31 (23 to 42)   | 30 (22 to 41)    | -3% (-9.7% to 3.7%)       |
| 17 | Nauru   | Non-venomous animal contact                     | 2 (1 to 4)      | 2 (1 to 4)       | 3.7% (-1.1% to 8.5%)      |
| 18 | Nauru   | Other exposure to mechanical forces             | 20 (10 to 38)   | 18 (9 to 33)     | -13.2% (-17.4% to -8.6%)  |
| 19 | Nauru   | Other road injuries                             | 2 (1 to 4)      | 2 (1 to 4)       | -1.1% (-8.8% to 7.6%)     |
| 20 | Nauru   | Other transport injuries                        | 3 (2 to 5)      | 3 (2 to 5)       | -3.3% (-8.3% to 1.5%)     |
| 21 | Nauru   | Other unintentional injuries                    | 2 (1 to 3)      | 2 (1 to 3)       | 1.7% (-3% to 6.8%)        |
| 22 | Nauru   | Pedestrian road injuries                        | 20 (14 to 28)   | 20 (14 to 29)    | 1.2% (-6.1% to 9.1%)      |
| 23 | Nauru   | Physical violence by firearm                    | 0 (0 to 0)      | 0 (0 to 0)       | 2.3% (-8.3% to 13.3%)     |
| 24 | Nauru   | Physical violence by other means                | 31 (21 to 48)   | 31 (20 to 47)    | -1.7% (-6.8% to 3.5%)     |
| 25 | Nauru   | Physical violence by sharp object               | 2 (1 to 5)      | 2 (1 to 4)       | -14.5% (-22.3% to -6.1%)  |
| 26 | Nauru   | Poisoning by carbon monoxide                    | 0 (0 to 0)      | 0 (0 to 0)       | 5% (-4.9% to 16.2%)       |
| 27 | Nauru   | Poisoning by other means                        | 0 (0 to 0)      | 0 (0 to 0)       | -18.3% (-25.5% to -10.8%) |
| 28 | Nauru   | Pulmonary aspiration and foreign body in airway | 0 (0 to 0)      | 0 (0 to 0)       | 5.8% (-5.4% to 17.3%)     |
| 29 | Nauru   | Self-harm by firearm                            | 0 (0 to 0)      | 0 (0 to 0)       | -2.2% (-9.7% to 6%)       |
| 30 | Nauru   | Self-harm by other specified means              | 0 (0 to 1)      | 0 (0 to 1)       | 0.8% (-6.2% to 8.1%)      |
| 31 | Nauru   | Unintentional firearm injuries                  | 1 (0 to 2)      | 1 (0 to 2)       | -15.2% (-23.8% to -7.4%)  |
| 32 | Nauru   | Venomous animal contact                         | 1 (0 to 1)      | 1 (0 to 2)       | 5.9% (-1.3% to 14.5%)     |
| 33 | Nepal   | Adverse effects of medical treatment            | 0 (0 to 0)      | 0 (0 to 0)       | 0% (0% to 0%)             |
| 34 | Nepal   | Conflict and terrorism                          | 0 (0 to 1)      | 0 (0 to 1)       | NA                        |
| 35 | Nepal   | Cyclist road injuries                           | 58 (44 to 74)   | 57 (43 to 75)    | -1.2% (-8.6% to 6%)       |
| 36 | Nepal   | Drowning                                        | 0 (0 to 1)      | 0 (0 to 1)       | -10.7% (-20.6% to -0.3%)  |
| 37 | Nepal   | Environmental heat and cold exposure            | 3 (2 to 4)      | 3 (2 to 4)       | -11% (-16.6% to -5%)      |
| 38 | Nepal   | Executions and police conflict                  | 0 (0 to 0)      | 0 (0 to 0)       | NA                        |
| 39 | Nepal   | Exposure to forces of nature                    | 1 (1 to 1)      | 0 (0 to 0)       | NA                        |
| 40 | Nepal   | Falls                                           | 119 (93 to 154) | 143 (113 to 185) | 20.5% (16.6% to 24.9%)    |
| 41 | Nepal   | Fire, heat, and hot substances                  | 0 (0 to 1)      | 1 (0 to 1)       | 10.8% (3.4% to 19.4%)     |
| 42 | Nepal   | Foreign body in eyes                            | 0 (0 to 0)      | 0 (0 to 0)       | -1.9% (-3.4% to -0.9%)    |
| 43 | Nepal   | Foreign body in other body part                 | 1 (1 to 2)      | 1 (1 to 2)       | -5.6% (-10.3% to -0.1%)   |
| 44 | Nepal   | Motor vehicle road injuries                     | 24 (18 to 31)   | 28 (21 to 37)    | 16.5% (6.3% to 26%)       |
| 45 |         |                                                 |                 |                  |                           |
| 46 |         |                                                 |                 |                  |                           |

|    |             |                                                 |                  |                  |                           |
|----|-------------|-------------------------------------------------|------------------|------------------|---------------------------|
| 1  |             |                                                 |                  |                  |                           |
| 2  | Nepal       | Motorecyclist road injuries                     | 27 (21 to 36)    | 32 (25 to 42)    | 19.5% (9.4% to 29.7%)     |
| 3  | Nepal       | Non-venomous animal contact                     | 14 (8 to 25)     | 12 (7 to 21)     | -14.6% (-20.1% to -8.6%)  |
| 4  | Nepal       | Other exposure to mechanical forces             | 10 (6 to 17)     | 11 (6 to 18)     | 3.3% (-2.6% to 8.8%)      |
| 5  | Nepal       | Other road injuries                             | 1 (1 to 2)       | 1 (1 to 2)       | 4.8% (-3.6% to 13.9%)     |
| 6  | Nepal       | Other transport injuries                        | 6 (5 to 8)       | 6 (5 to 8)       | 3.1% (-3.7% to 10.6%)     |
| 7  | Nepal       | Other unintentional injuries                    | 16 (10 to 25)    | 13 (8 to 21)     | -18.6% (-22.9% to -14.1%) |
| 8  | Nepal       | Pedestrian road injuries                        | 23 (18 to 30)    | 23 (17 to 29)    | -1.4% (-8.6% to 5.9%)     |
| 9  | Nepal       | Physical violence by firearm                    | 0 (0 to 0)       | 0 (0 to 0)       | 61.3% (37% to 90.9%)      |
| 10 | Nepal       | Physical violence by other means                | 23 (17 to 32)    | 28 (20 to 39)    | 20.5% (13.8% to 27.6%)    |
| 11 | Nepal       | Physical violence by sharp object               | 1 (0 to 1)       | 1 (1 to 2)       | 8.2% (-0.8% to 18.1%)     |
| 12 | Nepal       | Poisoning by carbon monoxide                    | 0 (0 to 0)       | 0 (0 to 0)       | -7.6% (-19.7% to 5%)      |
| 13 | Nepal       | Poisoning by other means                        | 0 (0 to 0)       | 0 (0 to 0)       | -33% (-39.9% to -25.2%)   |
| 14 | Nepal       | Pulmonary aspiration and foreign body in airway | 1 (0 to 1)       | 0 (0 to 1)       | -26% (-32.9% to -18.7%)   |
| 15 | Nepal       | Self-harm by firearm                            | 0 (0 to 1)       | 0 (0 to 1)       | 14.5% (-1.3% to 33.6%)    |
| 16 | Nepal       | Self-harm by other specified means              | 2 (1 to 3)       | 2 (1 to 3)       | 4% (-2.7% to 10.9%)       |
| 17 | Nepal       | Unintentional firearm injuries                  | 1 (0 to 1)       | 1 (0 to 1)       | -10.8% (-17.8% to -3.3%)  |
| 18 | Nepal       | Venomous animal contact                         | 6 (2 to 13)      | 6 (2 to 12)      | -7% (-15.2% to 1.7%)      |
| 19 | Netherlands | Adverse effects of medical treatment            | 0 (0 to 0)       | 0 (0 to 0)       | 0% (0% to 0%)             |
| 20 | Netherlands | Conflict and terrorism                          | 0 (0 to 0)       | 0 (0 to 0)       | NA                        |
| 21 | Netherlands | Cyclist road injuries                           | 37 (28 to 48)    | 20 (15 to 27)    | -45.3% (-53.4% to -36.4%) |
| 22 | Netherlands | Drowning                                        | 0 (0 to 0)       | 0 (0 to 0)       | 57.7% (41.4% to 75.7%)    |
| 23 | Netherlands | Environmental heat and cold exposure            | 2 (1 to 3)       | 2 (1 to 3)       | -3.1% (-7.6% to 1.3%)     |
| 24 | Netherlands | Executions and police conflict                  | 0 (0 to 0)       | 0 (0 to 0)       | NA                        |
| 25 | Netherlands | Exposure to forces of nature                    | 0 (0 to 0)       | 0 (0 to 0)       | NA                        |
| 26 | Netherlands | Falls                                           | 190 (150 to 240) | 270 (215 to 337) | 41.5% (35.4% to 48.3%)    |
| 27 | Netherlands | Fire, heat, and hot substances                  | 2 (1 to 4)       | 2 (1 to 4)       | -0.6% (-5.1% to 3.8%)     |
| 28 | Netherlands | Foreign body in eyes                            | 0 (0 to 0)       | 0 (0 to 0)       | 0.3% (0% to 1%)           |
| 29 | Netherlands | Foreign body in other body part                 | 2 (1 to 4)       | 2 (1 to 4)       | 1.6% (-2.6% to 8.7%)      |
| 30 | Netherlands | Motor vehicle road injuries                     | 26 (20 to 34)    | 18 (13 to 23)    | -33.3% (-43.5% to -21.5%) |
| 31 | Netherlands | Motorecyclist road injuries                     | 13 (9 to 16)     | 8 (6 to 11)      | -34.3% (-46.8% to -19.8%) |
| 32 | Netherlands | Non-venomous animal contact                     | 2 (1 to 3)       | 2 (1 to 3)       | -11.2% (-15.2% to -6.5%)  |
| 33 | Netherlands | Other exposure to mechanical forces             | 43 (26 to 69)    | 42 (25 to 67)    | -2.6% (-8.7% to 3.1%)     |
| 34 | Netherlands | Other road injuries                             | 1 (1 to 2)       | 1 (1 to 2)       | -4.1% (-19% to 13.2%)     |
| 35 | Netherlands | Other transport injuries                        | 4 (3 to 5)       | 4 (3 to 5)       | 3.6% (-1.6% to 9%)        |
| 36 | Netherlands | Other unintentional injuries                    | 22 (14 to 36)    | 21 (14 to 35)    | -3.6% (-8.2% to 1.7%)     |
| 37 | Netherlands | Pedestrian road injuries                        | 6 (5 to 8)       | 6 (4 to 8)       | -5.1% (-18.8% to 11.4%)   |
| 38 | Netherlands | Physical violence by firearm                    | 1 (0 to 1)       | 1 (0 to 1)       | 15.5% (4.4% to 27.6%)     |
| 39 | Netherlands | Physical violence by other means                | 13 (9 to 19)     | 12 (8 to 17)     | -11.8% (-18.5% to -4.7%)  |
| 40 | Netherlands | Physical violence by sharp object               | 2 (1 to 3)       | 1 (1 to 2)       | -26% (-35% to -17.3%)     |
| 41 | Netherlands | Poisoning by carbon monoxide                    | 0 (0 to 0)       | 0 (0 to 0)       | 10.3% (1.9% to 19%)       |
| 42 | Netherlands | Poisoning by other means                        | 0 (0 to 0)       | 0 (0 to 0)       | -5.3% (-11.4% to 1.1%)    |
| 43 | Netherlands | Pulmonary aspiration and foreign body in airway | 1 (1 to 2)       | 1 (1 to 2)       | -9% (-16.7% to -2.3%)     |
| 44 | Netherlands | Self-harm by firearm                            | 0 (0 to 0)       | 0 (0 to 0)       | 15.8% (2.5% to 32.2%)     |
| 45 |             |                                                 |                  |                  |                           |
| 46 |             |                                                 |                  |                  |                           |

|    |             |                                                 |                  |                  |                           |
|----|-------------|-------------------------------------------------|------------------|------------------|---------------------------|
| 1  |             |                                                 |                  |                  |                           |
| 2  | Netherlands | Self-harm by other specified means              | 3 (2 to 5)       | 3 (2 to 4)       | -8.1% (-12.3% to -3.1%)   |
| 3  | Netherlands | Unintentional firearm injuries                  | 1 (1 to 2)       | 1 (1 to 2)       | 5.4% (-3% to 14.4%)       |
| 4  | Netherlands | Venomous animal contact                         | 1 (0 to 2)       | 1 (0 to 2)       | -10.9% (-16.1% to -5.5%)  |
| 5  | New Zealand | Adverse effects of medical treatment            | 0 (0 to 0)       | 0 (0 to 0)       | 0% (0% to 0%)             |
| 6  | New Zealand | Conflict and terrorism                          | 0 (0 to 0)       | 0 (0 to 0)       | NA                        |
| 7  | New Zealand | Cyclist road injuries                           | 14 (10 to 21)    | 11 (8 to 15)     | -24.6% (-34.4% to -13.2%) |
| 8  | New Zealand | Drowning                                        | 0 (0 to 1)       | 0 (0 to 0)       | -34.8% (-40.6% to -28.8%) |
| 9  | New Zealand | Environmental heat and cold exposure            | 3 (2 to 4)       | 2 (1 to 2)       | -38.7% (-46.1% to -29.8%) |
| 10 | New Zealand | Executions and police conflict                  | 0 (0 to 0)       | 0 (0 to 0)       | NA                        |
| 11 | New Zealand | Exposure to forces of nature                    | 0 (0 to 0)       | 0 (0 to 0)       | NA                        |
| 12 | New Zealand | Falls                                           | 307 (236 to 397) | 372 (291 to 482) | 21.2% (14% to 29.4%)      |
| 13 | New Zealand | Fire, heat, and hot substances                  | 4 (3 to 7)       | 4 (2 to 6)       | -14.2% (-19.9% to -5.4%)  |
| 14 | New Zealand | Foreign body in eyes                            | 0 (0 to 0)       | 0 (0 to 0)       | -0.1% (-0.6% to 0.3%)     |
| 15 | New Zealand | Foreign body in other body part                 | 7 (3 to 13)      | 7 (3 to 13)      | -1.5% (-10.7% to 9%)      |
| 16 | New Zealand | Motor vehicle road injuries                     | 64 (47 to 84)    | 56 (44 to 69)    | -12.6% (-22.3% to 0.8%)   |
| 17 | New Zealand | Motorcyclist road injuries                      | 19 (13 to 26)    | 14 (11 to 18)    | -26.8% (-39.2% to -12.9%) |
| 18 | New Zealand | Non-venomous animal contact                     | 17 (9 to 29)     | 14 (8 to 23)     | -17.4% (-31.3% to -1.5%)  |
| 19 | New Zealand | Other exposure to mechanical forces             | 220 (137 to 352) | 200 (124 to 316) | -9.4% (-16.2% to -0.8%)   |
| 20 | New Zealand | Other road injuries                             | 5 (3 to 8)       | 3 (2 to 5)       | -33.5% (-42.7% to -22.3%) |
| 21 | New Zealand | Other transport injuries                        | 10 (7 to 13)     | 7 (6 to 9)       | -24.5% (-36.1% to -12%)   |
| 22 | New Zealand | Other unintentional injuries                    | 71 (45 to 115)   | 66 (43 to 104)   | -7.1% (-15% to 1.5%)      |
| 23 | New Zealand | Pedestrian road injuries                        | 12 (8 to 16)     | 10 (7 to 12)     | -16.4% (-26.9% to -4.3%)  |
| 24 | New Zealand | Physical violence by firearm                    | 0 (0 to 1)       | 0 (0 to 1)       | -15.3% (-26.4% to -3%)    |
| 25 | New Zealand | Physical violence by other means                | 43 (29 to 63)    | 43 (30 to 60)    | -0.7% (-8.9% to 9.8%)     |
| 26 | New Zealand | Physical violence by sharp object               | 3 (2 to 5)       | 2 (1 to 3)       | -37.5% (-45.5% to -27%)   |
| 27 | New Zealand | Poisoning by carbon monoxide                    | 0 (0 to 0)       | 0 (0 to 0)       | -9.2% (-24.6% to 12.1%)   |
| 28 | New Zealand | Poisoning by other means                        | 0 (0 to 0)       | 0 (0 to 0)       | -22.7% (-30.4% to -13%)   |
| 29 | New Zealand | Pulmonary aspiration and foreign body in airway | 2 (1 to 4)       | 3 (2 to 4)       | 11.5% (0.5% to 25.9%)     |
| 30 | New Zealand | Self-harm by firearm                            | 0 (0 to 0)       | 0 (0 to 0)       | -76.2% (-80.5% to -70.8%) |
| 31 | New Zealand | Self-harm by other specified means              | 5 (3 to 8)       | 3 (2 to 6)       | -26.1% (-31.8% to -21%)   |
| 32 | New Zealand | Unintentional firearm injuries                  | 1 (1 to 2)       | 1 (0 to 1)       | -40% (-53.5% to -21.8%)   |
| 33 | New Zealand | Venomous animal contact                         | 4 (1 to 9)       | 3 (1 to 7)       | -22.7% (-39.3% to -1.8%)  |
| 34 | Nicaragua   | Adverse effects of medical treatment            | 0 (0 to 0)       | 0 (0 to 0)       | 0% (0% to 0%)             |
| 35 | Nicaragua   | Conflict and terrorism                          | 10 (4 to 22)     | 0 (0 to 0)       | NA                        |
| 36 | Nicaragua   | Cyclist road injuries                           | 21 (15 to 30)    | 18 (12 to 25)    | -16% (-25% to -6.4%)      |
| 37 | Nicaragua   | Drowning                                        | 0 (0 to 0)       | 0 (0 to 0)       | 23.6% (9.1% to 42.8%)     |
| 38 | Nicaragua   | Environmental heat and cold exposure            | 3 (2 to 4)       | 3 (2 to 4)       | 2.8% (-1.2% to 7.4%)      |
| 39 | Nicaragua   | Executions and police conflict                  | 0 (0 to 0)       | 0 (0 to 0)       | NA                        |
| 40 | Nicaragua   | Exposure to forces of nature                    | 0 (0 to 0)       | 0 (0 to 0)       | NA                        |
| 41 | Nicaragua   | Falls                                           | 72 (55 to 95)    | 91 (69 to 119)   | 26.1% (20.4% to 31.1%)    |
| 42 | Nicaragua   | Fire, heat, and hot substances                  | 3 (2 to 6)       | 3 (2 to 5)       | -2.8% (-10.2% to 4.9%)    |
| 43 | Nicaragua   | Foreign body in eyes                            | 0 (0 to 0)       | 0 (0 to 0)       | 0.2% (-0.2% to 0.7%)      |
| 44 | Nicaragua   | Foreign body in other body part                 | 1 (1 to 2)       | 1 (1 to 2)       | -1.5% (-7.2% to 3.4%)     |
| 45 |             |                                                 |                  |                  |                           |
| 46 |             |                                                 |                  |                  |                           |



|    |           |                                                 |               |               |                           |
|----|-----------|-------------------------------------------------|---------------|---------------|---------------------------|
| 1  |           |                                                 |               |               |                           |
| 2  | Nicaragua | Motor vehicle road injuries                     | 34 (26 to 43) | 29 (22 to 37) | -14.7% (-22.4% to -6.2%)  |
| 3  | Nicaragua | Motorcyclist road injuries                      | 8 (6 to 11)   | 13 (10 to 17) | 57.9% (41.3% to 76.5%)    |
| 4  | Nicaragua | Non-venomous animal contact                     | 6 (3 to 11)   | 6 (3 to 10)   | -9.2% (-14.8% to -2.9%)   |
| 5  | Nicaragua | Other exposure to mechanical forces             | 41 (24 to 67) | 37 (21 to 61) | -10% (-18.3% to -1.8%)    |
| 6  | Nicaragua | Other road injuries                             | 6 (3 to 9)    | 5 (3 to 7)    | -14% (-23.6% to -4.4%)    |
| 7  | Nicaragua | Other transport injuries                        | 4 (3 to 5)    | 4 (3 to 5)    | 0.9% (-4.9% to 7.1%)      |
| 8  | Nicaragua | Other unintentional injuries                    | 14 (9 to 22)  | 10 (6 to 17)  | -27.5% (-34.5% to -20.2%) |
| 9  | Nicaragua | Pedestrian road injuries                        | 28 (22 to 35) | 17 (13 to 22) | -37.9% (-43.7% to -31.7%) |
| 10 | Nicaragua | Physical violence by firearm                    | 1 (1 to 1)    | 1 (1 to 2)    | 65.4% (41.8% to 90.1%)    |
| 11 | Nicaragua | Physical violence by other means                | 16 (11 to 23) | 13 (9 to 20)  | -15.1% (-22.9% to -6.2%)  |
| 12 | Nicaragua | Physical violence by sharp object               | 7 (5 to 10)   | 6 (4 to 8)    | -19.2% (-29.4% to -8.1%)  |
| 13 | Nicaragua | Poisoning by carbon monoxide                    | 0 (0 to 0)    | 0 (0 to 0)    | 33.6% (18.7% to 50.9%)    |
| 14 | Nicaragua | Poisoning by other means                        | 0 (0 to 0)    | 0 (0 to 0)    | -9.7% (-17.3% to -1.1%)   |
| 15 | Nicaragua | Pulmonary aspiration and foreign body in airway | 1 (0 to 1)    | 0 (0 to 1)    | -34.7% (-43.3% to -25.5%) |
| 16 | Nicaragua | Self-harm by firearm                            | 0 (0 to 0)    | 0 (0 to 0)    | 16.3% (0% to 34.1%)       |
| 17 | Nicaragua | Self-harm by other specified means              | 1 (0 to 1)    | 1 (0 to 1)    | 6.1% (-1.5% to 14.3%)     |
| 18 | Nicaragua | Unintentional firearm injuries                  | 4 (2 to 6)    | 3 (1 to 4)    | -29.6% (-39.9% to -19.8%) |
| 19 | Niger     | Venomous animal contact                         | 8 (4 to 15)   | 8 (4 to 14)   | -8.4% (-13.5% to -2.5%)   |
| 20 | Niger     | Adverse effects of medical treatment            | 0 (0 to 0)    | 0 (0 to 0)    | 0% (0% to 0%)             |
| 21 | Niger     | Conflict and terrorism                          | 12 (4 to 30)  | 8 (2 to 20)   | NA                        |
| 22 | Niger     | Cyclist road injuries                           | 24 (15 to 36) | 27 (17 to 39) | 13.9% (6.5% to 21.8%)     |
| 23 | Niger     | Drowning                                        | 0 (0 to 0)    | 0 (0 to 0)    | -11.2% (-18.7% to -3.9%)  |
| 24 | Niger     | Environmental heat and cold exposure            | 0 (0 to 1)    | 0 (0 to 1)    | -0.2% (-6.4% to 5.9%)     |
| 25 | Niger     | Executions and police conflict                  | 0 (0 to 0)    | 0 (0 to 0)    | NA                        |
| 26 | Niger     | Exposure to forces of nature                    | 0 (0 to 0)    | 0 (0 to 0)    | NA                        |
| 27 | Niger     | Falls                                           | 19 (13 to 29) | 22 (14 to 33) | 12.6% (8.1% to 16.9%)     |
| 28 | Niger     | Fire, heat, and hot substances                  | 0 (0 to 0)    | 0 (0 to 0)    | -12% (-18.1% to -6%)      |
| 29 | Niger     | Foreign body in eyes                            | 0 (0 to 0)    | 0 (0 to 0)    | -0.6% (-1.6% to -0.1%)    |
| 30 | Niger     | Foreign body in other body part                 | 4 (2 to 8)    | 4 (2 to 8)    | -4.2% (-9.1% to 1.1%)     |
| 31 | Niger     | Motor vehicle road injuries                     | 43 (30 to 60) | 45 (31 to 62) | 5.2% (-1.5% to 13%)       |
| 32 | Niger     | Motorcyclist road injuries                      | 20 (14 to 28) | 19 (13 to 26) | -7.5% (-14.2% to -0.1%)   |
| 33 | Niger     | Non-venomous animal contact                     | 3 (2 to 7)    | 3 (1 to 6)    | -7.9% (-13.2% to -3.3%)   |
| 34 | Niger     | Other exposure to mechanical forces             | 25 (12 to 45) | 22 (11 to 40) | -11.3% (-16.4% to -5.1%)  |
| 35 | Niger     | Other road injuries                             | 2 (1 to 4)    | 2 (1 to 4)    | 13.2% (4% to 23.5%)       |
| 36 | Niger     | Other transport injuries                        | 4 (3 to 5)    | 3 (2 to 4)    | -16.5% (-22.5% to -11.3%) |
| 37 | Niger     | Other unintentional injuries                    | 3 (2 to 5)    | 2 (1 to 4)    | -13.9% (-18.7% to -9.5%)  |
| 38 | Niger     | Pedestrian road injuries                        | 46 (33 to 60) | 46 (33 to 60) | -0.3% (-6.8% to 6.8%)     |
| 39 | Niger     | Physical violence by firearm                    | 0 (0 to 0)    | 0 (0 to 0)    | 10.9% (-0.3% to 24.7%)    |
| 40 | Niger     | Physical violence by other means                | 9 (6 to 14)   | 9 (6 to 13)   | -4.5% (-9.5% to 0.6%)     |
| 41 | Niger     | Physical violence by sharp object               | 3 (2 to 6)    | 3 (2 to 5)    | -6.3% (-12.6% to 0.4%)    |
| 42 | Niger     | Poisoning by carbon monoxide                    | 0 (0 to 0)    | 0 (0 to 0)    | 9.8% (-2.8% to 24.2%)     |
| 43 | Niger     | Poisoning by other means                        | 0 (0 to 0)    | 0 (0 to 0)    | -19.7% (-27.3% to -10.7%) |
| 44 | Niger     | Pulmonary aspiration and foreign body in airway | 0 (0 to 0)    | 0 (0 to 0)    | -16.1% (-25.1% to -6.4%)  |
| 45 |           |                                                 |               |               |                           |
| 46 |           |                                                 |               |               |                           |

|    |         |                                                 |               |               |                           |
|----|---------|-------------------------------------------------|---------------|---------------|---------------------------|
| 1  |         |                                                 |               |               |                           |
| 2  | Niger   | Self-harm by firearm                            | 0 (0 to 0)    | 0 (0 to 0)    | 19.6% (12.8% to 28.1%)    |
| 3  | Niger   | Self-harm by other specified means              | 0 (0 to 0)    | 0 (0 to 0)    | 7% (1.7% to 12.5%)        |
| 4  | Niger   | Unintentional firearm injuries                  | 1 (0 to 2)    | 1 (0 to 2)    | -14.3% (-21.6% to -6.4%)  |
| 5  | Niger   | Venomous animal contact                         | 0 (0 to 1)    | 0 (0 to 1)    | -4.4% (-11.9% to 3.4%)    |
| 6  | Nigeria | Adverse effects of medical treatment            | 0 (0 to 0)    | 0 (0 to 0)    | 0% (0% to 0%)             |
| 7  | Nigeria | Conflict and terrorism                          | 0 (0 to 1)    | 6 (2 to 17)   | NA                        |
| 8  | Nigeria | Cyclist road injuries                           | 22 (14 to 33) | 26 (16 to 38) | 14.8% (12.1% to 17.7%)    |
| 9  | Nigeria | Drowning                                        | 0 (0 to 0)    | 0 (0 to 0)    | -11.1% (-16.3% to -6.1%)  |
| 10 | Nigeria | Environmental heat and cold exposure            | 0 (0 to 1)    | 0 (0 to 1)    | -0.9% (-3.7% to 1.6%)     |
| 11 | Nigeria | Executions and police conflict                  | 0 (0 to 0)    | 0 (0 to 1)    | NA                        |
| 12 | Nigeria | Exposure to forces of nature                    | 0 (0 to 0)    | 0 (0 to 0)    | NA                        |
| 13 | Nigeria | Falls                                           | 20 (13 to 30) | 21 (13 to 31) | 3.3% (2.3% to 4.4%)       |
| 14 | Nigeria | Fire, heat, and hot substances                  | 0 (0 to 0)    | 0 (0 to 0)    | -14.4% (-17.5% to -11.6%) |
| 15 | Nigeria | Foreign body in eyes                            | 0 (0 to 0)    | 0 (0 to 0)    | -1.8% (-4.6% to -0.1%)    |
| 16 | Nigeria | Foreign body in other body part                 | 4 (2 to 9)    | 4 (2 to 8)    | -1.7% (-2.8% to -0.4%)    |
| 17 | Nigeria | Motor vehicle road injuries                     | 39 (26 to 55) | 43 (29 to 60) | 11.1% (8.8% to 13.7%)     |
| 18 | Nigeria | Motorcyclist road injuries                      | 19 (13 to 27) | 21 (14 to 30) | 10.5% (7.9% to 13.1%)     |
| 19 | Nigeria | Non-venomous animal contact                     | 3 (1 to 6)    | 2 (1 to 5)    | -18.7% (-22.1% to -15.7%) |
| 20 | Nigeria | Other exposure to mechanical forces             | 27 (13 to 49) | 22 (11 to 41) | -17.6% (-20.8% to -14.4%) |
| 21 | Nigeria | Other road injuries                             | 2 (1 to 4)    | 2 (1 to 5)    | 14.7% (11.7% to 17.9%)    |
| 22 | Nigeria | Other transport injuries                        | 3 (2 to 4)    | 3 (2 to 4)    | -2.6% (-5.3% to 0%)       |
| 23 | Nigeria | Other unintentional injuries                    | 3 (2 to 5)    | 2 (1 to 4)    | -13.6% (-18.7% to -9.2%)  |
| 24 | Nigeria | Pedestrian road injuries                        | 41 (30 to 54) | 44 (32 to 60) | 8.9% (6.7% to 11.1%)      |
| 25 | Nigeria | Physical violence by firearm                    | 0 (0 to 1)    | 0 (0 to 1)    | 6.5% (2% to 10.9%)        |
| 26 | Nigeria | Physical violence by other means                | 9 (6 to 14)   | 9 (6 to 14)   | -0.2% (-2.2% to 1.6%)     |
| 27 | Nigeria | Physical violence by sharp object               | 3 (2 to 6)    | 3 (1 to 5)    | -4% (-6.5% to -1.9%)      |
| 28 | Nigeria | Poisoning by carbon monoxide                    | 0 (0 to 0)    | 0 (0 to 0)    | -11% (-14.9% to -7%)      |
| 29 | Nigeria | Poisoning by other means                        | 0 (0 to 0)    | 0 (0 to 0)    | -21.3% (-25.5% to -16.9%) |
| 30 | Nigeria | Pulmonary aspiration and foreign body in airway | 0 (0 to 0)    | 0 (0 to 0)    | -14.4% (-17.3% to -11.8%) |
| 31 | Nigeria | Self-harm by firearm                            | 0 (0 to 0)    | 0 (0 to 0)    | 3.8% (0.9% to 6.7%)       |
| 32 | Nigeria | Self-harm by other specified means              | 0 (0 to 0)    | 0 (0 to 0)    | -2.9% (-5.2% to -0.7%)    |
| 33 | Nigeria | Unintentional firearm injuries                  | 1 (0 to 2)    | 1 (0 to 2)    | -26.4% (-31.6% to -21.5%) |
| 34 | Nigeria | Venomous animal contact                         | 0 (0 to 1)    | 0 (0 to 1)    | -17.5% (-22.4% to -13.8%) |
| 35 | Niue    | Adverse effects of medical treatment            | 0 (0 to 0)    | 0 (0 to 0)    | 0% (0% to 0%)             |
| 36 | Niue    | Conflict and terrorism                          | 0 (0 to 0)    | 0 (0 to 0)    | NA                        |
| 37 | Niue    | Cyclist road injuries                           | 9 (5 to 14)   | 9 (5 to 14)   | 3.5% (-3.8% to 11.4%)     |
| 38 | Niue    | Drowning                                        | 0 (0 to 0)    | 0 (0 to 0)    | 37.8% (25.7% to 51.7%)    |
| 39 | Niue    | Environmental heat and cold exposure            | 0 (0 to 1)    | 0 (0 to 1)    | 0.5% (-4.8% to 5.9%)      |
| 40 | Niue    | Executions and police conflict                  | 0 (0 to 0)    | 0 (0 to 0)    | NA                        |
| 41 | Niue    | Exposure to forces of nature                    | 0 (0 to 0)    | 0 (0 to 0)    | NA                        |
| 42 | Niue    | Falls                                           | 27 (17 to 42) | 41 (26 to 64) | 52.4% (47% to 58.8%)      |
| 43 | Niue    | Fire, heat, and hot substances                  | 0 (0 to 0)    | 0 (0 to 0)    | 6.1% (1.2% to 11.3%)      |
| 44 | Niue    | Foreign body in eyes                            | 0 (0 to 0)    | 0 (0 to 0)    | 0.4% (-0.1% to 1.2%)      |
| 45 |         |                                                 |               |               |                           |
| 46 |         |                                                 |               |               |                           |

|    |                 |                                                 |                  |                  |                           |
|----|-----------------|-------------------------------------------------|------------------|------------------|---------------------------|
| 1  |                 |                                                 |                  |                  |                           |
| 2  | Niue            | Foreign body in other body part                 | 1 (0 to 2)       | 1 (0 to 2)       | -1.3% (-5.1% to 3.5%)     |
| 3  | Niue            | Motor vehicle road injuries                     | 31 (22 to 45)    | 27 (18 to 39)    | -14.1% (-20.4% to -7.7%)  |
| 4  | Niue            | Motorcyclist road injuries                      | 25 (18 to 33)    | 24 (17 to 32)    | -4% (-10.5% to 3.1%)      |
| 5  | Niue            | Non-venomous animal contact                     | 3 (1 to 5)       | 2 (1 to 4)       | -14.8% (-18.7% to -10.8%) |
| 6  | Niue            | Other exposure to mechanical forces             | 20 (10 to 37)    | 18 (9 to 33)     | -9.5% (-14.4% to -4.8%)   |
| 7  | Niue            | Other road injuries                             | 2 (1 to 4)       | 2 (1 to 4)       | 2.6% (-6.5% to 12%)       |
| 8  | Niue            | Other transport injuries                        | 3 (2 to 5)       | 3 (2 to 4)       | -7.2% (-13.7% to -1.7%)   |
| 9  | Niue            | Other unintentional injuries                    | 2 (1 to 4)       | 2 (1 to 3)       | -3.6% (-8.8% to 1%)       |
| 10 | Niue            | Pedestrian road injuries                        | 16 (11 to 23)    | 15 (10 to 21)    | -10% (-16.7% to -2.8%)    |
| 11 | Niue            | Physical violence by firearm                    | 0 (0 to 0)       | 0 (0 to 0)       | 9.1% (-2.3% to 21.2%)     |
| 12 | Niue            | Physical violence by other means                | 31 (21 to 47)    | 27 (18 to 41)    | -12.6% (-18.5% to -7.1%)  |
| 13 | Niue            | Physical violence by sharp object               | 3 (1 to 5)       | 2 (1 to 4)       | -27.3% (-36.3% to -19.1%) |
| 14 | Niue            | Poisoning by carbon monoxide                    | 0 (0 to 0)       | 0 (0 to 0)       | 11.4% (1.8% to 23.2%)     |
| 15 | Niue            | Poisoning by other means                        | 0 (0 to 0)       | 0 (0 to 0)       | -10.2% (-17.3% to -2.5%)  |
| 16 | Niue            | Pulmonary aspiration and foreign body in airway | 0 (0 to 0)       | 0 (0 to 0)       | -7.2% (-17.7% to 2.7%)    |
| 17 | Niue            | Self-harm by firearm                            | 0 (0 to 0)       | 0 (0 to 0)       | -12.4% (-20% to -4.6%)    |
| 18 | Niue            | Self-harm by other specified means              | 0 (0 to 1)       | 0 (0 to 0)       | -7.2% (-14.2% to 0.4%)    |
| 19 | Niue            | Unintentional firearm injuries                  | 1 (0 to 2)       | 1 (0 to 2)       | -10.8% (-18.8% to -2.2%)  |
| 20 | Niue            | Venomous animal contact                         | 1 (0 to 2)       | 1 (0 to 2)       | -11.1% (-17.4% to -4.4%)  |
| 21 | North Macedonia | Adverse effects of medical treatment            | 0 (0 to 0)       | 0 (0 to 0)       | 0% (0% to 0%)             |
| 22 | North Macedonia | Conflict and terrorism                          | 0 (0 to 0)       | 0 (0 to 0)       | NA                        |
| 23 | North Macedonia | Cyclist road injuries                           | 59 (42 to 78)    | 57 (40 to 76)    | -3.3% (-11.7% to 4.5%)    |
| 24 | North Macedonia | Drowning                                        | 0 (0 to 0)       | 0 (0 to 1)       | 178.1% (135.7% to 230.8%) |
| 25 | North Macedonia | Environmental heat and cold exposure            | 2 (1 to 2)       | 2 (1 to 2)       | 2.4% (-1.6% to 6.7%)      |
| 26 | North Macedonia | Executions and police conflict                  | 0 (0 to 0)       | 0 (0 to 0)       | NA                        |
| 27 | North Macedonia | Exposure to forces of nature                    | 0 (0 to 0)       | 0 (0 to 0)       | NA                        |
| 28 | North Macedonia | Falls                                           | 136 (102 to 184) | 225 (172 to 297) | 65.3% (56.5% to 75.6%)    |
| 29 | North Macedonia | Fire, heat, and hot substances                  | 3 (2 to 5)       | 3 (2 to 6)       | 5.7% (1.4% to 10%)        |
| 30 | North Macedonia | Foreign body in eyes                            | 0 (0 to 0)       | 0 (0 to 0)       | 0.5% (0.2% to 0.9%)       |
| 31 | North Macedonia | Foreign body in other body part                 | 2 (1 to 5)       | 2 (1 to 5)       | 1.6% (-4.4% to 7.6%)      |
| 32 | North Macedonia | Motor vehicle road injuries                     | 93 (72 to 118)   | 95 (74 to 122)   | 2.7% (-6% to 11%)         |
| 33 | North Macedonia | Motorcyclist road injuries                      | 9 (6 to 12)      | 11 (8 to 15)     | 24.5% (9.1% to 40.8%)     |
| 34 | North Macedonia | Non-venomous animal contact                     | 6 (3 to 11)      | 6 (3 to 10)      | -9.1% (-13.9% to -3.3%)   |
| 35 | North Macedonia | Other exposure to mechanical forces             | 130 (81 to 206)  | 137 (85 to 216)  | 4.8% (-0.3% to 9.8%)      |
| 36 | North Macedonia | Other road injuries                             | 1 (1 to 2)       | 1 (1 to 2)       | -8% (-17.5% to 0.9%)      |
| 37 | North Macedonia | Other transport injuries                        | 6 (4 to 8)       | 6 (4 to 8)       | 5.4% (-0.2% to 10.6%)     |
| 38 | North Macedonia | Other unintentional injuries                    | 90 (59 to 141)   | 34 (22 to 55)    | -62.4% (-66.5% to -57.6%) |
| 39 | North Macedonia | Pedestrian road injuries                        | 35 (27 to 45)    | 27 (21 to 36)    | -21.9% (-29.1% to -14.3%) |
| 40 | North Macedonia | Physical violence by firearm                    | 0 (0 to 0)       | 0 (0 to 1)       | 100.4% (73.9% to 127.6%)  |
| 41 | North Macedonia | Physical violence by other means                | 34 (25 to 48)    | 26 (18 to 37)    | -24.4% (-32.5% to -16.6%) |
| 42 | North Macedonia | Physical violence by sharp object               | 2 (1 to 3)       | 2 (1 to 3)       | 1.8% (-11.2% to 16.3%)    |
| 43 | North Macedonia | Poisoning by carbon monoxide                    | 0 (0 to 0)       | 0 (0 to 0)       | 35.7% (25.5% to 47.7%)    |
| 44 | North Macedonia | Poisoning by other means                        | 0 (0 to 1)       | 0 (0 to 1)       | 4.9% (-1.6% to 11.1%)     |
| 45 |                 |                                                 |                  |                  |                           |
| 46 |                 |                                                 |                  |                  |                           |

|    |                          |                                                 |                  |                  |                           |
|----|--------------------------|-------------------------------------------------|------------------|------------------|---------------------------|
| 1  |                          |                                                 |                  |                  |                           |
| 2  | North Macedonia          | Pulmonary aspiration and foreign body in airway | 1 (0 to 2)       | 1 (0 to 1)       | -10.4% (-16.8% to -2.6%)  |
| 3  | North Macedonia          | Self-harm by firearm                            | 0 (0 to 1)       | 0 (0 to 1)       | 29% (14.9% to 45.1%)      |
| 4  | North Macedonia          | Self-harm by other specified means              | 2 (1 to 3)       | 2 (1 to 3)       | -8.8% (-13.5% to -3.1%)   |
| 5  | North Macedonia          | Unintentional firearm injuries                  | 1 (1 to 2)       | 1 (1 to 2)       | -8% (-16.6% to 0.4%)      |
| 6  | North Macedonia          | Venomous animal contact                         | 5 (2 to 10)      | 5 (2 to 9)       | -10.8% (-15.5% to -5.2%)  |
| 7  | Northern Mariana Islands | Adverse effects of medical treatment            | 0 (0 to 0)       | 0 (0 to 0)       | 0% (0% to 0%)             |
| 8  | Northern Mariana Islands | Conflict and terrorism                          | 0 (0 to 0)       | 0 (0 to 0)       | NA                        |
| 9  | Northern Mariana Islands | Cyclist road injuries                           | 8 (5 to 12)      | 8 (5 to 12)      | 1.3% (-5.9% to 9.1%)      |
| 10 | Northern Mariana Islands | Drowning                                        | 0 (0 to 0)       | 0 (0 to 1)       | 24.4% (15.1% to 35.9%)    |
| 11 | Northern Mariana Islands | Environmental heat and cold exposure            | 0 (0 to 1)       | 0 (0 to 1)       | 3.9% (-3.5% to 9.8%)      |
| 12 | Northern Mariana Islands | Executions and police conflict                  | 0 (0 to 0)       | 0 (0 to 0)       | NA                        |
| 13 | Northern Mariana Islands | Exposure to forces of nature                    | 0 (0 to 0)       | 0 (0 to 0)       | NA                        |
| 14 | Northern Mariana Islands | Falls                                           | 41 (26 to 60)    | 55 (35 to 83)    | 36% (30.4% to 41.9%)      |
| 15 | Northern Mariana Islands | Fire, heat, and hot substances                  | 0 (0 to 0)       | 0 (0 to 0)       | 6.9% (0.6% to 12.5%)      |
| 16 | Northern Mariana Islands | Foreign body in eyes                            | 0 (0 to 0)       | 0 (0 to 0)       | -2.4% (-5% to -0.6%)      |
| 17 | Northern Mariana Islands | Foreign body in other body part                 | 1 (0 to 2)       | 1 (0 to 2)       | 0% (-4.7% to 5%)          |
| 18 | Northern Mariana Islands | Motor vehicle road injuries                     | 45 (32 to 63)    | 26 (18 to 37)    | -42.8% (-47.6% to -37.9%) |
| 19 | Northern Mariana Islands | Motorcyclist road injuries                      | 27 (19 to 38)    | 23 (17 to 31)    | -12.9% (-19.7% to -5.5%)  |
| 20 | Northern Mariana Islands | Non-venomous animal contact                     | 2 (1 to 3)       | 2 (1 to 4)       | 9.3% (4.5% to 14.7%)      |
| 21 | Northern Mariana Islands | Other exposure to mechanical forces             | 31 (15 to 56)    | 21 (10 to 39)    | -32.2% (-38.2% to -25.5%) |
| 22 | Northern Mariana Islands | Other road injuries                             | 2 (1 to 4)       | 2 (1 to 4)       | -4.6% (-13.7% to 5.6%)    |
| 23 | Northern Mariana Islands | Other transport injuries                        | 5 (3 to 7)       | 3 (2 to 5)       | -31.5% (-38.7% to -23.8%) |
| 24 | Northern Mariana Islands | Other unintentional injuries                    | 3 (2 to 5)       | 3 (2 to 5)       | -15.6% (-21% to -10.1%)   |
| 25 | Northern Mariana Islands | Pedestrian road injuries                        | 32 (23 to 44)    | 20 (14 to 28)    | -37.7% (-43% to -32.4%)   |
| 26 | Northern Mariana Islands | Physical violence by firearm                    | 1 (0 to 1)       | 0 (0 to 1)       | -42.2% (-51.7% to -31.5%) |
| 27 | Northern Mariana Islands | Physical violence by other means                | 40 (27 to 60)    | 36 (24 to 54)    | -11.1% (-16.2% to -4.9%)  |
| 28 | Northern Mariana Islands | Physical violence by sharp object               | 4 (2 to 7)       | 2 (1 to 4)       | -53.9% (-61.1% to -46%)   |
| 29 | Northern Mariana Islands | Poisoning by carbon monoxide                    | 0 (0 to 0)       | 0 (0 to 0)       | 13.7% (4.6% to 23.7%)     |
| 30 | Northern Mariana Islands | Poisoning by other means                        | 0 (0 to 0)       | 0 (0 to 0)       | -1.2% (-8.5% to 5.7%)     |
| 31 | Northern Mariana Islands | Pulmonary aspiration and foreign body in airway | 0 (0 to 0)       | 0 (0 to 0)       | 18.9% (3.5% to 36.6%)     |
| 32 | Northern Mariana Islands | Self-harm by firearm                            | 0 (0 to 0)       | 0 (0 to 0)       | 5.8% (-6.8% to 17.3%)     |
| 33 | Northern Mariana Islands | Self-harm by other specified means              | 0 (0 to 0)       | 0 (0 to 1)       | 39.5% (27.7% to 53.5%)    |
| 34 | Northern Mariana Islands | Unintentional firearm injuries                  | 2 (1 to 4)       | 1 (0 to 3)       | -37.6% (-46.7% to -28.4%) |
| 35 | Northern Mariana Islands | Venomous animal contact                         | 1 (0 to 1)       | 1 (0 to 2)       | 9.2% (1.1% to 17.3%)      |
| 36 | Norway                   | Adverse effects of medical treatment            | 0 (0 to 0)       | 0 (0 to 0)       | 0% (0% to 0%)             |
| 37 | Norway                   | Conflict and terrorism                          | 0 (0 to 0)       | 0 (0 to 0)       | NA                        |
| 38 | Norway                   | Cyclist road injuries                           | 16 (10 to 24)    | 12 (7 to 17)     | -27.6% (-31.2% to -23.6%) |
| 39 | Norway                   | Drowning                                        | 0 (0 to 0)       | 0 (0 to 0)       | -14.2% (-18% to -10.3%)   |
| 40 | Norway                   | Environmental heat and cold exposure            | 1 (0 to 1)       | 1 (0 to 1)       | -16.5% (-20.5% to -13.1%) |
| 41 | Norway                   | Executions and police conflict                  | 0 (0 to 0)       | 0 (0 to 0)       | NA                        |
| 42 | Norway                   | Exposure to forces of nature                    | 0 (0 to 1)       | 0 (0 to 0)       | NA                        |
| 43 | Norway                   | Falls                                           | 146 (100 to 213) | 156 (107 to 227) | 6.6% (3.6% to 9.7%)       |
| 44 | Norway                   | Fire, heat, and hot substances                  | 1 (1 to 1)       | 1 (0 to 1)       | -27% (-31% to -23.5%)     |
| 45 |                          |                                                 |                  |                  |                           |
| 46 |                          |                                                 |                  |                  |                           |

|    |        |                                                 |                 |                  |                           |
|----|--------|-------------------------------------------------|-----------------|------------------|---------------------------|
| 1  |        |                                                 |                 |                  |                           |
| 2  | Norway | Foreign body in eyes                            | 0 (0 to 0)      | 0 (0 to 0)       | -1.6% (-2.7% to -0.4%)    |
| 3  | Norway | Foreign body in other body part                 | 2 (1 to 5)      | 2 (1 to 5)       | 1.6% (0.4% to 2.9%)       |
| 4  | Norway | Motor vehicle road injuries                     | 28 (18 to 40)   | 16 (11 to 23)    | -41.4% (-45.1% to -37.6%) |
| 5  | Norway | Motorcyclist road injuries                      | 18 (13 to 25)   | 10 (7 to 14)     | -46.4% (-49.6% to -43.4%) |
| 6  | Norway | Non-venomous animal contact                     | 2 (1 to 3)      | 2 (1 to 3)       | -9.3% (-10.8% to -7.9%)   |
| 7  | Norway | Other exposure to mechanical forces             | 86 (43 to 158)  | 69 (35 to 126)   | -19.7% (-24.3% to -15.4%) |
| 8  | Norway | Other road injuries                             | 3 (2 to 6)      | 1 (1 to 3)       | -58.6% (-64% to -53.3%)   |
| 9  | Norway | Other transport injuries                        | 6 (4 to 9)      | 3 (2 to 4)       | -48.8% (-51.6% to -45.9%) |
| 10 | Norway | Other unintentional injuries                    | 10 (6 to 17)    | 9 (5 to 17)      | -4.6% (-8.2% to -1.4%)    |
| 11 | Norway | Pedestrian road injuries                        | 9 (6 to 13)     | 5 (3 to 8)       | -38% (-43% to -32.5%)     |
| 12 | Norway | Physical violence by firearm                    | 0 (0 to 1)      | 1 (0 to 1)       | 28.3% (20.1% to 37.6%)    |
| 13 | Norway | Physical violence by other means                | 16 (10 to 24)   | 13 (8 to 20)     | -19.5% (-24% to -15.5%)   |
| 14 | Norway | Physical violence by sharp object               | 2 (1 to 3)      | 1 (1 to 3)       | -20.2% (-27.4% to -13.4%) |
| 15 | Norway | Poisoning by carbon monoxide                    | 0 (0 to 0)      | 0 (0 to 0)       | -1.1% (-5.1% to 2.2%)     |
| 16 | Norway | Poisoning by other means                        | 0 (0 to 0)      | 0 (0 to 0)       | 17% (13.2% to 20.4%)      |
| 17 | Norway | Pulmonary aspiration and foreign body in airway | 0 (0 to 1)      | 0 (0 to 1)       | -11.5% (-15.5% to -8.3%)  |
| 18 | Norway | Self-harm by firearm                            | 0 (0 to 1)      | 0 (0 to 0)       | -46.9% (-53% to -41%)     |
| 19 | Norway | Self-harm by other specified means              | 1 (0 to 1)      | 1 (0 to 1)       | -20.1% (-23.7% to -15.8%) |
| 20 | Norway | Unintentional firearm injuries                  | 1 (0 to 1)      | 1 (0 to 1)       | -2.6% (-7.5% to 2%)       |
| 21 | Norway | Venomous animal contact                         | 0 (0 to 1)      | 0 (0 to 1)       | -9.6% (-12.3% to -7.1%)   |
| 22 | Oman   | Adverse effects of medical treatment            | 0 (0 to 0)      | 0 (0 to 0)       | 0% (0% to 0%)             |
| 23 | Oman   | Conflict and terrorism                          | 0 (0 to 0)      | 0 (0 to 0)       | NA                        |
| 24 | Oman   | Cyclist road injuries                           | 25 (16 to 35)   | 20 (13 to 28)    | -20% (-28.6% to -9.8%)    |
| 25 | Oman   | Drowning                                        | 0 (0 to 0)      | 0 (0 to 1)       | 49.8% (30% to 72.7%)      |
| 26 | Oman   | Environmental heat and cold exposure            | 4 (3 to 6)      | 4 (3 to 5)       | -5.3% (-10.6% to 0%)      |
| 27 | Oman   | Executions and police conflict                  | 0 (0 to 0)      | 0 (0 to 0)       | NA                        |
| 28 | Oman   | Exposure to forces of nature                    | 0 (0 to 0)      | 0 (0 to 0)       | NA                        |
| 29 | Oman   | Falls                                           | 118 (93 to 150) | 149 (117 to 189) | 26.3% (20.9% to 31.6%)    |
| 30 | Oman   | Fire, heat, and hot substances                  | 1 (0 to 1)      | 1 (0 to 1)       | 5.3% (-3.1% to 13.7%)     |
| 31 | Oman   | Foreign body in eyes                            | 0 (0 to 0)      | 0 (0 to 0)       | 1.6% (0.7% to 2.8%)       |
| 32 | Oman   | Foreign body in other body part                 | 1 (1 to 3)      | 1 (1 to 3)       | -0.1% (-4.6% to 5%)       |
| 33 | Oman   | Motor vehicle road injuries                     | 100 (77 to 128) | 73 (57 to 93)    | -27.6% (-34.7% to -18.9%) |
| 34 | Oman   | Motorcyclist road injuries                      | 14 (10 to 19)   | 10 (7 to 14)     | -27.5% (-38% to -15.6%)   |
| 35 | Oman   | Non-venomous animal contact                     | 3 (1 to 5)      | 2 (1 to 4)       | -5% (-10.3% to -0.1%)     |
| 36 | Oman   | Other exposure to mechanical forces             | 36 (23 to 57)   | 26 (15 to 41)    | -29.3% (-35.9% to -22.8%) |
| 37 | Oman   | Other road injuries                             | 2 (1 to 4)      | 2 (1 to 4)       | -4.2% (-15.6% to 8.8%)    |
| 38 | Oman   | Other transport injuries                        | 5 (3 to 7)      | 5 (4 to 7)       | 7.3% (1.4% to 13%)        |
| 39 | Oman   | Other unintentional injuries                    | 17 (10 to 28)   | 18 (11 to 31)    | 9.3% (4.5% to 14.7%)      |
| 40 | Oman   | Pedestrian road injuries                        | 74 (57 to 91)   | 57 (44 to 71)    | -22.5% (-29.1% to -14.6%) |
| 41 | Oman   | Physical violence by firearm                    | 0 (0 to 0)      | 1 (0 to 1)       | 161.9% (132% to 195.9%)   |
| 42 | Oman   | Physical violence by other means                | 10 (7 to 14)    | 10 (7 to 15)     | 6.6% (0.3% to 13%)        |
| 43 | Oman   | Physical violence by sharp object               | 1 (1 to 2)      | 1 (1 to 2)       | 5.5% (-3.8% to 15.5%)     |
| 44 | Oman   | Poisoning by carbon monoxide                    | 0 (0 to 0)      | 0 (0 to 0)       | 33.3% (19.1% to 49.5%)    |
| 45 |        |                                                 |                 |                  |                           |
| 46 |        |                                                 |                 |                  |                           |

|    |          |                                                 |               |                |                           |
|----|----------|-------------------------------------------------|---------------|----------------|---------------------------|
| 1  |          |                                                 |               |                |                           |
| 2  | Oman     | Poisoning by other means                        | 0 (0 to 0)    | 0 (0 to 0)     | -25.7% (-34.9% to -17.5%) |
| 3  | Oman     | Pulmonary aspiration and foreign body in airway | 0 (0 to 1)    | 0 (0 to 1)     | -2.1% (-9.7% to 5.1%)     |
| 4  | Oman     | Self-harm by firearm                            | 0 (0 to 0)    | 0 (0 to 0)     | 16.3% (1.8% to 33.9%)     |
| 5  | Oman     | Self-harm by other specified means              | 1 (1 to 1)    | 1 (1 to 1)     | 2.1% (-5.5% to 10%)       |
| 6  | Oman     | Unintentional firearm injuries                  | 2 (1 to 3)    | 2 (1 to 3)     | 2.1% (-8.2% to 13.2%)     |
| 7  | Oman     | Venomous animal contact                         | 1 (1 to 3)    | 1 (1 to 3)     | -3% (-8.7% to 3.5%)       |
| 8  | Pakistan | Adverse effects of medical treatment            | 0 (0 to 0)    | 0 (0 to 0)     | 0% (0% to 0%)             |
| 9  | Pakistan | Conflict and terrorism                          | 1 (1 to 3)    | 1 (0 to 3)     | NA                        |
| 10 | Pakistan | Cyclist road injuries                           | 51 (37 to 69) | 67 (48 to 92)  | 31.4% (26.1% to 36%)      |
| 11 | Pakistan | Drowning                                        | 0 (0 to 0)    | 0 (0 to 0)     | -6% (-15.9% to 5.3%)      |
| 12 | Pakistan | Environmental heat and cold exposure            | 3 (2 to 4)    | 3 (2 to 4)     | 2.1% (-1.5% to 5.6%)      |
| 13 | Pakistan | Executions and police conflict                  | 0 (0 to 0)    | 0 (0 to 0)     | NA                        |
| 14 | Pakistan | Exposure to forces of nature                    | 0 (0 to 0)    | 0 (0 to 0)     | NA                        |
| 15 | Pakistan | Falls                                           | 36 (28 to 48) | 48 (37 to 64)  | 31.8% (28.1% to 35.6%)    |
| 16 | Pakistan | Fire, heat, and hot substances                  | 0 (0 to 1)    | 0 (0 to 1)     | -6.9% (-10.8% to -2.7%)   |
| 17 | Pakistan | Foreign body in eyes                            | 0 (0 to 0)    | 0 (0 to 0)     | -1.3% (-2.3% to -0.6%)    |
| 18 | Pakistan | Foreign body in other body part                 | 1 (1 to 3)    | 1 (1 to 3)     | -2.9% (-6.2% to 0.9%)     |
| 19 | Pakistan | Motor vehicle road injuries                     | 32 (23 to 43) | 48 (34 to 65)  | 50.9% (45.1% to 57.1%)    |
| 20 | Pakistan | Motorcyclist road injuries                      | 27 (20 to 37) | 47 (35 to 63)  | 74.6% (68% to 81.6%)      |
| 21 | Pakistan | Non-venomous animal contact                     | 8 (5 to 14)   | 7 (4 to 12)    | -15.5% (-18.5% to -12.5%) |
| 22 | Pakistan | Other exposure to mechanical forces             | 9 (5 to 15)   | 9 (5 to 15)    | -1.6% (-5.4% to 2.8%)     |
| 23 | Pakistan | Other road injuries                             | 1 (1 to 3)    | 2 (1 to 3)     | 24.4% (16.7% to 30.8%)    |
| 24 | Pakistan | Other transport injuries                        | 5 (4 to 7)    | 6 (5 to 8)     | 14.2% (9.7% to 18.6%)     |
| 25 | Pakistan | Other unintentional injuries                    | 10 (7 to 16)  | 9 (6 to 15)    | -11.2% (-14.2% to -7.7%)  |
| 26 | Pakistan | Pedestrian road injuries                        | 27 (20 to 36) | 38 (28 to 51)  | 40.2% (34.8% to 45.5%)    |
| 27 | Pakistan | Physical violence by firearm                    | 0 (0 to 0)    | 0 (0 to 0)     | -12.8% (-19.3% to -4.8%)  |
| 28 | Pakistan | Physical violence by other means                | 44 (31 to 60) | 41 (29 to 57)  | -5.8% (-9.8% to -1.4%)    |
| 29 | Pakistan | Physical violence by sharp object               | 2 (1 to 3)    | 2 (1 to 3)     | 0.1% (-5.8% to 6.9%)      |
| 30 | Pakistan | Poisoning by carbon monoxide                    | 0 (0 to 0)    | 0 (0 to 0)     | -14.9% (-21.8% to -8.2%)  |
| 31 | Pakistan | Poisoning by other means                        | 0 (0 to 0)    | 0 (0 to 0)     | -20.3% (-26.1% to -14.6%) |
| 32 | Pakistan | Pulmonary aspiration and foreign body in airway | 0 (0 to 1)    | 0 (0 to 1)     | -7.6% (-12.8% to -2.4%)   |
| 33 | Pakistan | Self-harm by firearm                            | 0 (0 to 1)    | 0 (0 to 1)     | 19.3% (9.9% to 27.9%)     |
| 34 | Pakistan | Self-harm by other specified means              | 1 (1 to 2)    | 1 (1 to 2)     | 23.4% (18.6% to 28.3%)    |
| 35 | Pakistan | Unintentional firearm injuries                  | 1 (0 to 1)    | 1 (0 to 1)     | -7.9% (-12.8% to -2.7%)   |
| 36 | Pakistan | Venomous animal contact                         | 3 (1 to 7)    | 3 (1 to 6)     | -8.4% (-12.8% to -4.1%)   |
| 37 | Palau    | Adverse effects of medical treatment            | 0 (0 to 0)    | 0 (0 to 0)     | 0% (0% to 0%)             |
| 38 | Palau    | Conflict and terrorism                          | 0 (0 to 0)    | 0 (0 to 0)     | NA                        |
| 39 | Palau    | Cyclist road injuries                           | 7 (4 to 11)   | 7 (4 to 11)    | 5.8% (-1.4% to 14.1%)     |
| 40 | Palau    | Drowning                                        | 0 (0 to 0)    | 0 (0 to 1)     | 26.1% (16.8% to 37.1%)    |
| 41 | Palau    | Environmental heat and cold exposure            | 1 (0 to 1)    | 1 (0 to 1)     | -3% (-8.4% to 3.1%)       |
| 42 | Palau    | Executions and police conflict                  | 0 (0 to 0)    | 0 (0 to 0)     | NA                        |
| 43 | Palau    | Exposure to forces of nature                    | 0 (0 to 0)    | 0 (0 to 0)     | NA                        |
| 44 | Palau    | Falls                                           | 60 (38 to 88) | 78 (51 to 117) | 30.8% (25.5% to 36.2%)    |
| 45 |          |                                                 |               |                |                           |
| 46 |          |                                                 |               |                |                           |

|    |           |                                                 |                 |                 |                           |
|----|-----------|-------------------------------------------------|-----------------|-----------------|---------------------------|
| 1  |           |                                                 |                 |                 |                           |
| 2  | Palau     | Fire, heat, and hot substances                  | 0 (0 to 1)      | 0 (0 to 1)      | -9.4% (-14.5% to -4.2%)   |
| 3  | Palau     | Foreign body in eyes                            | 0 (0 to 0)      | 0 (0 to 0)      | 2.6% (1.4% to 4.6%)       |
| 4  | Palau     | Foreign body in other body part                 | 1 (0 to 2)      | 1 (0 to 2)      | -4.7% (-9.2% to 0.5%)     |
| 5  | Palau     | Motor vehicle road injuries                     | 24 (16 to 35)   | 24 (16 to 35)   | -0.8% (-8.1% to 7.3%)     |
| 6  | Palau     | Motorcyclist road injuries                      | 27 (20 to 37)   | 27 (20 to 36)   | -0.1% (-7.4% to 6.8%)     |
| 7  | Palau     | Non-venomous animal contact                     | 4 (2 to 8)      | 4 (2 to 8)      | -3.5% (-8.6% to 2.1%)     |
| 8  | Palau     | Other exposure to mechanical forces             | 35 (18 to 62)   | 30 (15 to 55)   | -11.8% (-17.2% to -6%)    |
| 9  | Palau     | Other road injuries                             | 2 (1 to 4)      | 3 (1 to 5)      | 9.4% (-1.9% to 22.1%)     |
| 10 | Palau     | Other transport injuries                        | 6 (4 to 8)      | 6 (4 to 8)      | -1.7% (-7.3% to 3.6%)     |
| 11 | Palau     | Other unintentional injuries                    | 4 (2 to 6)      | 3 (2 to 6)      | -8.2% (-13.5% to -3%)     |
| 12 | Palau     | Pedestrian road injuries                        | 16 (11 to 22)   | 16 (11 to 22)   | 0.6% (-6.7% to 8.8%)      |
| 13 | Palau     | Physical violence by firearm                    | 0 (0 to 0)      | 0 (0 to 0)      | 27.3% (14.1% to 41.3%)    |
| 14 | Palau     | Physical violence by other means                | 46 (30 to 69)   | 43 (29 to 65)   | -5.5% (-11.3% to 0.1%)    |
| 15 | Palau     | Physical violence by sharp object               | 2 (1 to 3)      | 1 (1 to 3)      | -10.4% (-19.8% to -0.4%)  |
| 16 | Palau     | Poisoning by carbon monoxide                    | 0 (0 to 0)      | 0 (0 to 0)      | 1.2% (-10.2% to 13.6%)    |
| 17 | Palau     | Poisoning by other means                        | 0 (0 to 0)      | 0 (0 to 0)      | -27.3% (-33.9% to -20.9%) |
| 18 | Palau     | Pulmonary aspiration and foreign body in airway | 0 (0 to 0)      | 0 (0 to 0)      | -9.5% (-19.1% to 2.1%)    |
| 19 | Palau     | Self-harm by firearm                            | 0 (0 to 0)      | 0 (0 to 0)      | 12.6% (3.7% to 23.8%)     |
| 20 | Palau     | Self-harm by other specified means              | 0 (0 to 1)      | 0 (0 to 0)      | -4.2% (-11.8% to 3.6%)    |
| 21 | Palau     | Unintentional firearm injuries                  | 1 (0 to 2)      | 1 (0 to 2)      | -11.9% (-19.9% to -1.3%)  |
| 22 | Palau     | Venomous animal contact                         | 2 (1 to 4)      | 2 (1 to 4)      | -3.8% (-10.7% to 5.9%)    |
| 23 | Palestine | Adverse effects of medical treatment            | 0 (0 to 0)      | 0 (0 to 0)      | 0% (0% to 0%)             |
| 24 | Palestine | Conflict and terrorism                          | 143 (57 to 327) | 7 (3 to 16)     | NA                        |
| 25 | Palestine | Cyclist road injuries                           | 13 (9 to 19)    | 13 (9 to 18)    | -3.5% (-12% to 5.9%)      |
| 26 | Palestine | Drowning                                        | 0 (0 to 0)      | 0 (0 to 1)      | 51.3% (31.8% to 71.8%)    |
| 27 | Palestine | Environmental heat and cold exposure            | 3 (2 to 4)      | 3 (2 to 4)      | 3.3% (-1.8% to 8.3%)      |
| 28 | Palestine | Executions and police conflict                  | 0 (0 to 0)      | 3 (1 to 5)      | NA                        |
| 29 | Palestine | Exposure to forces of nature                    | 0 (0 to 0)      | 0 (0 to 0)      | NA                        |
| 30 | Palestine | Falls                                           | 92 (71 to 121)  | 102 (79 to 134) | 10.6% (5.7% to 15%)       |
| 31 | Palestine | Fire, heat, and hot substances                  | 1 (0 to 1)      | 1 (0 to 1)      | -4.6% (-16.5% to 6.7%)    |
| 32 | Palestine | Foreign body in eyes                            | 0 (0 to 0)      | 0 (0 to 0)      | 1% (0.4% to 2.2%)         |
| 33 | Palestine | Foreign body in other body part                 | 1 (1 to 3)      | 1 (1 to 3)      | 0.6% (-4.1% to 5.4%)      |
| 34 | Palestine | Motor vehicle road injuries                     | 23 (18 to 30)   | 18 (14 to 23)   | -23.2% (-29.7% to -16.2%) |
| 35 | Palestine | Motorcyclist road injuries                      | 5 (4 to 7)      | 4 (3 to 6)      | -15% (-24.4% to -4.5%)    |
| 36 | Palestine | Non-venomous animal contact                     | 5 (3 to 8)      | 5 (2 to 8)      | -2.6% (-7.9% to 2.4%)     |
| 37 | Palestine | Other exposure to mechanical forces             | 25 (15 to 42)   | 24 (14 to 38)   | -6.4% (-14.1% to 0.7%)    |
| 38 | Palestine | Other road injuries                             | 2 (1 to 3)      | 2 (1 to 3)      | -0.7% (-10.3% to 10%)     |
| 39 | Palestine | Other transport injuries                        | 5 (4 to 7)      | 6 (4 to 8)      | 6.6% (1.3% to 12.1%)      |
| 40 | Palestine | Other unintentional injuries                    | 18 (12 to 30)   | 18 (11 to 29)   | -3.5% (-11.8% to 4%)      |
| 41 | Palestine | Pedestrian road injuries                        | 14 (11 to 19)   | 12 (9 to 15)    | -16.6% (-24% to -9%)      |
| 42 | Palestine | Physical violence by firearm                    | 0 (0 to 1)      | 2 (1 to 3)      | 492.4% (393.7% to 615.6%) |
| 43 | Palestine | Physical violence by other means                | 12 (8 to 17)    | 26 (18 to 36)   | 116.4% (93.5% to 141.1%)  |
| 44 | Palestine | Physical violence by sharp object               | 2 (1 to 3)      | 3 (2 to 5)      | 91.8% (64.7% to 120.7%)   |
| 45 |           |                                                 |                 |                 |                           |
| 46 |           |                                                 |                 |                 |                           |

|    |                  |                                                 |                |                |                           |
|----|------------------|-------------------------------------------------|----------------|----------------|---------------------------|
| 1  |                  |                                                 |                |                |                           |
| 2  | Palestine        | Poisoning by carbon monoxide                    | 0 (0 to 0)     | 0 (0 to 0)     | 58.2% (44% to 76.6%)      |
| 3  | Palestine        | Poisoning by other means                        | 0 (0 to 0)     | 0 (0 to 0)     | 9.3% (0.9% to 17.8%)      |
| 4  | Palestine        | Pulmonary aspiration and foreign body in airway | 0 (0 to 1)     | 0 (0 to 1)     | -0.1% (-7.7% to 7.5%)     |
| 5  | Palestine        | Self-harm by firearm                            | 0 (0 to 0)     | 0 (0 to 0)     | 26.2% (12.6% to 43.2%)    |
| 6  | Palestine        | Self-harm by other specified means              | 1 (0 to 1)     | 1 (0 to 1)     | 1.7% (-4.3% to 8.1%)      |
| 7  | Palestine        | Unintentional firearm injuries                  | 3 (2 to 4)     | 2 (1 to 3)     | -33.4% (-42.9% to -22.4%) |
| 8  | Palestine        | Venomous animal contact                         | 3 (1 to 6)     | 3 (1 to 5)     | -3.1% (-9.6% to 2.9%)     |
| 9  | Panama           | Adverse effects of medical treatment            | 0 (0 to 0)     | 0 (0 to 0)     | 0% (0% to 0%)             |
| 10 | Panama           | Conflict and terrorism                          | 0 (0 to 1)     | 0 (0 to 0)     | NA                        |
| 11 | Panama           | Cyclist road injuries                           | 29 (21 to 39)  | 21 (15 to 29)  | -28% (-36.1% to -19.3%)   |
| 12 | Panama           | Drowning                                        | 0 (0 to 1)     | 0 (0 to 1)     | 2% (-9.9% to 15.7%)       |
| 13 | Panama           | Environmental heat and cold exposure            | 3 (2 to 5)     | 3 (2 to 5)     | 2.7% (-1.4% to 8.1%)      |
| 14 | Panama           | Executions and police conflict                  | 0 (0 to 0)     | 0 (0 to 0)     | NA                        |
| 15 | Panama           | Exposure to forces of nature                    | 0 (0 to 0)     | 0 (0 to 0)     | NA                        |
| 16 | Panama           | Falls                                           | 88 (68 to 115) | 88 (66 to 119) | -0.4% (-5.9% to 4.9%)     |
| 17 | Panama           | Fire, heat, and hot substances                  | 3 (2 to 5)     | 3 (2 to 6)     | 1% (-4.3% to 7.7%)        |
| 18 | Panama           | Foreign body in eyes                            | 0 (0 to 0)     | 0 (0 to 0)     | -0.3% (-0.7% to -0.1%)    |
| 19 | Panama           | Foreign body in other body part                 | 1 (1 to 2)     | 1 (1 to 2)     | -4.2% (-10.1% to 1.9%)    |
| 20 | Panama           | Motor vehicle road injuries                     | 55 (43 to 69)  | 47 (37 to 59)  | -15.2% (-23% to -6.7%)    |
| 21 | Panama           | Motorcyclist road injuries                      | 6 (4 to 8)     | 8 (6 to 11)    | 35% (21.4% to 50.4%)      |
| 22 | Panama           | Non-venomous animal contact                     | 6 (3 to 10)    | 4 (2 to 8)     | -22.5% (-27.8% to -16.6%) |
| 23 | Panama           | Other exposure to mechanical forces             | 39 (23 to 63)  | 39 (23 to 64)  | 0.8% (-5.6% to 7%)        |
| 24 | Panama           | Other road injuries                             | 5 (3 to 9)     | 5 (3 to 8)     | -4.3% (-14.5% to 6.7%)    |
| 25 | Panama           | Other transport injuries                        | 3 (2 to 4)     | 3 (2 to 4)     | -1.9% (-7.7% to 4.5%)     |
| 26 | Panama           | Other unintentional injuries                    | 12 (8 to 20)   | 10 (6 to 17)   | -14.7% (-20.7% to -9.1%)  |
| 27 | Panama           | Pedestrian road injuries                        | 31 (25 to 39)  | 21 (16 to 26)  | -33.7% (-40.7% to -26.6%) |
| 28 | Panama           | Physical violence by firearm                    | 1 (1 to 2)     | 5 (4 to 7)     | 256.2% (184.9% to 349.5%) |
| 29 | Panama           | Physical violence by other means                | 16 (11 to 24)  | 25 (17 to 37)  | 54.3% (33.1% to 79.2%)    |
| 30 | Panama           | Physical violence by sharp object               | 8 (5 to 12)    | 9 (6 to 14)    | 9.1% (-8.8% to 31%)       |
| 31 | Panama           | Poisoning by carbon monoxide                    | 0 (0 to 0)     | 0 (0 to 0)     | 39.1% (25.4% to 55%)      |
| 32 | Panama           | Poisoning by other means                        | 0 (0 to 0)     | 0 (0 to 0)     | 0.9% (-6.4% to 10.8%)     |
| 33 | Panama           | Pulmonary aspiration and foreign body in airway | 1 (0 to 1)     | 0 (0 to 1)     | -42.3% (-50% to -33%)     |
| 34 | Panama           | Self-harm by firearm                            | 0 (0 to 0)     | 0 (0 to 0)     | 3.1% (-12.2% to 18.6%)    |
| 35 | Panama           | Self-harm by other specified means              | 0 (0 to 1)     | 0 (0 to 1)     | 0.2% (-7.6% to 8.4%)      |
| 36 | Panama           | Unintentional firearm injuries                  | 2 (1 to 4)     | 3 (2 to 4)     | 13.7% (3% to 25.9%)       |
| 37 | Panama           | Venomous animal contact                         | 11 (6 to 19)   | 7 (4 to 13)    | -33.6% (-38.9% to -29.1%) |
| 38 | Papua New Guinea | Adverse effects of medical treatment            | 0 (0 to 0)     | 0 (0 to 0)     | 0% (0% to 0%)             |
| 39 | Papua New Guinea | Conflict and terrorism                          | 5 (2 to 12)    | 0 (0 to 0)     | NA                        |
| 40 | Papua New Guinea | Cyclist road injuries                           | 11 (7 to 15)   | 11 (7 to 16)   | 5.7% (-1.7% to 13.4%)     |
| 41 | Papua New Guinea | Drowning                                        | 0 (0 to 0)     | 0 (0 to 0)     | 4.8% (-4.7% to 14.4%)     |
| 42 | Papua New Guinea | Environmental heat and cold exposure            | 2 (1 to 3)     | 2 (1 to 3)     | -1.8% (-7.5% to 4%)       |
| 43 | Papua New Guinea | Executions and police conflict                  | 0 (0 to 0)     | 0 (0 to 0)     | NA                        |
| 44 | Papua New Guinea | Exposure to forces of nature                    | 0 (0 to 0)     | 1 (1 to 2)     | NA                        |
| 45 |                  |                                                 |                |                |                           |
| 46 |                  |                                                 |                |                |                           |



|    |                  |                                                 |                 |                 |                           |
|----|------------------|-------------------------------------------------|-----------------|-----------------|---------------------------|
| 1  |                  |                                                 |                 |                 |                           |
| 2  | Papua New Guinea | Falls                                           | 61 (48 to 79)   | 89 (70 to 115)  | 46.1% (40.3% to 52.7%)    |
| 3  | Papua New Guinea | Fire, heat, and hot substances                  | 3 (2 to 4)      | 3 (2 to 4)      | 0.6% (-5.1% to 6.3%)      |
| 4  | Papua New Guinea | Foreign body in eyes                            | 0 (0 to 0)      | 0 (0 to 0)      | -0.1% (-0.4% to 0.3%)     |
| 5  | Papua New Guinea | Foreign body in other body part                 | 1 (0 to 1)      | 1 (0 to 1)      | -2.2% (-7.1% to 2.6%)     |
| 6  | Papua New Guinea | Motor vehicle road injuries                     | 33 (26 to 42)   | 33 (26 to 43)   | -0.1% (-7.2% to 7.8%)     |
| 7  | Papua New Guinea | Motorcyclist road injuries                      | 19 (14 to 24)   | 20 (15 to 26)   | 5.8% (-2.7% to 14%)       |
| 8  | Papua New Guinea | Non-venomous animal contact                     | 5 (3 to 9)      | 4 (2 to 8)      | -11.2% (-16.5% to -6.2%)  |
| 9  | Papua New Guinea | Other exposure to mechanical forces             | 11 (6 to 18)    | 10 (6 to 17)    | -4.4% (-9.8% to 0.8%)     |
| 10 | Papua New Guinea | Other road injuries                             | 2 (1 to 3)      | 2 (1 to 3)      | 4.6% (-5.7% to 15.2%)     |
| 11 | Papua New Guinea | Other transport injuries                        | 9 (7 to 11)     | 8 (7 to 11)     | -7.8% (-12.1% to -2.9%)   |
| 12 | Papua New Guinea | Other unintentional injuries                    | 5 (3 to 8)      | 5 (3 to 8)      | 1.8% (-3.3% to 7.2%)      |
| 13 | Papua New Guinea | Pedestrian road injuries                        | 18 (13 to 23)   | 17 (13 to 22)   | -4.6% (-12.6% to 3.2%)    |
| 14 | Papua New Guinea | Physical violence by firearm                    | 0 (0 to 0)      | 0 (0 to 0)      | 63.9% (49.6% to 79.1%)    |
| 15 | Papua New Guinea | Physical violence by other means                | 28 (20 to 39)   | 43 (30 to 60)   | 52% (42.5% to 62.5%)      |
| 16 | Papua New Guinea | Physical violence by sharp object               | 3 (1 to 5)      | 4 (2 to 7)      | 41.4% (27.7% to 55.8%)    |
| 17 | Papua New Guinea | Poisoning by carbon monoxide                    | 0 (0 to 0)      | 0 (0 to 0)      | 14.8% (3.7% to 27.8%)     |
| 18 | Papua New Guinea | Poisoning by other means                        | 0 (0 to 0)      | 0 (0 to 0)      | -9.6% (-15.9% to -2.2%)   |
| 19 | Papua New Guinea | Pulmonary aspiration and foreign body in airway | 0 (0 to 0)      | 0 (0 to 0)      | 2% (-9.6% to 14.4%)       |
| 20 | Papua New Guinea | Self-harm by firearm                            | 0 (0 to 0)      | 0 (0 to 0)      | -0.6% (-11.6% to 10.7%)   |
| 21 | Papua New Guinea | Self-harm by other specified means              | 1 (0 to 1)      | 1 (0 to 1)      | 7% (-0.8% to 15.2%)       |
| 22 | Papua New Guinea | Unintentional firearm injuries                  | 2 (1 to 3)      | 2 (1 to 3)      | -1.9% (-8% to 5.4%)       |
| 23 | Papua New Guinea | Venomous animal contact                         | 4 (2 to 8)      | 4 (2 to 7)      | -13.1% (-18.6% to -7.9%)  |
| 24 | Paraguay         | Adverse effects of medical treatment            | 0 (0 to 0)      | 0 (0 to 0)      | 0% (0% to 0%)             |
| 25 | Paraguay         | Conflict and terrorism                          | 0 (0 to 0)      | 0 (0 to 0)      | NA                        |
| 26 | Paraguay         | Cyclist road injuries                           | 15 (10 to 21)   | 13 (9 to 20)    | -10.9% (-20.7% to -0.1%)  |
| 27 | Paraguay         | Drowning                                        | 0 (0 to 0)      | 0 (0 to 0)      | 5.8% (-5.8% to 17.1%)     |
| 28 | Paraguay         | Environmental heat and cold exposure            | 9 (7 to 13)     | 10 (7 to 14)    | 9.3% (4.6% to 15.4%)      |
| 29 | Paraguay         | Executions and police conflict                  | 0 (0 to 0)      | 0 (0 to 0)      | NA                        |
| 30 | Paraguay         | Exposure to forces of nature                    | 0 (0 to 0)      | 0 (0 to 0)      | NA                        |
| 31 | Paraguay         | Falls                                           | 108 (81 to 143) | 111 (84 to 148) | 3.1% (-1% to 7.2%)        |
| 32 | Paraguay         | Fire, heat, and hot substances                  | 2 (1 to 4)      | 2 (1 to 4)      | -4% (-8.5% to 1.2%)       |
| 33 | Paraguay         | Foreign body in eyes                            | 0 (0 to 0)      | 0 (0 to 0)      | 0.2% (0.1% to 0.5%)       |
| 34 | Paraguay         | Foreign body in other body part                 | 0 (0 to 1)      | 0 (0 to 1)      | -6% (-10.7% to -0.7%)     |
| 35 | Paraguay         | Motor vehicle road injuries                     | 8 (6 to 11)     | 9 (6 to 13)     | 10.4% (-2.9% to 24.5%)    |
| 36 | Paraguay         | Motorcyclist road injuries                      | 29 (22 to 37)   | 47 (37 to 58)   | 62.2% (43% to 85.1%)      |
| 37 | Paraguay         | Non-venomous animal contact                     | 2 (1 to 4)      | 2 (1 to 3)      | -17.1% (-22.3% to -11.8%) |
| 38 | Paraguay         | Other exposure to mechanical forces             | 26 (16 to 42)   | 24 (14 to 38)   | -8.2% (-14.5% to -1.1%)   |
| 39 | Paraguay         | Other road injuries                             | 5 (3 to 8)      | 4 (2 to 7)      | -3.1% (-14.5% to 8.7%)    |
| 40 | Paraguay         | Other transport injuries                        | 2 (2 to 3)      | 2 (2 to 3)      | -10.1% (-14.5% to -5.7%)  |
| 41 | Paraguay         | Other unintentional injuries                    | 27 (18 to 41)   | 24 (16 to 37)   | -10.1% (-14.5% to -5%)    |
| 42 | Paraguay         | Pedestrian road injuries                        | 26 (20 to 33)   | 27 (20 to 34)   | 1.4% (-9.1% to 13.9%)     |
| 43 | Paraguay         | Physical violence by firearm                    | 2 (1 to 2)      | 2 (2 to 3)      | 48.4% (27.7% to 73.4%)    |
| 44 | Paraguay         | Physical violence by other means                | 10 (7 to 15)    | 10 (7 to 15)    | 0.3% (-9.6% to 10.4%)     |
| 45 |                  |                                                 |                 |                 |                           |
| 46 |                  |                                                 |                 |                 |                           |

|    |             |                                                 |                |                |                           |
|----|-------------|-------------------------------------------------|----------------|----------------|---------------------------|
| 1  |             |                                                 |                |                |                           |
| 2  | Paraguay    | Physical violence by sharp object               | 4 (3 to 7)     | 4 (2 to 6)     | -7.3% (-19.5% to 6%)      |
| 3  | Paraguay    | Poisoning by carbon monoxide                    | 0 (0 to 0)     | 0 (0 to 0)     | 17.4% (6.3% to 28.8%)     |
| 4  | Paraguay    | Poisoning by other means                        | 0 (0 to 0)     | 0 (0 to 0)     | -16.8% (-22.7% to -11.4%) |
| 5  | Paraguay    | Pulmonary aspiration and foreign body in airway | 1 (0 to 1)     | 0 (0 to 1)     | -36.3% (-43.5% to -27.8%) |
| 6  | Paraguay    | Self-harm by firearm                            | 0 (0 to 0)     | 0 (0 to 0)     | 67.7% (49.2% to 87.5%)    |
| 7  | Paraguay    | Self-harm by other specified means              | 0 (0 to 0)     | 0 (0 to 1)     | 65.7% (52.2% to 82.2%)    |
| 8  | Paraguay    | Unintentional firearm injuries                  | 2 (1 to 4)     | 2 (1 to 3)     | -25% (-32.7% to -16.4%)   |
| 9  | Peru        | Venomous animal contact                         | 5 (3 to 10)    | 5 (2 to 8)     | -15.4% (-19.8% to -11%)   |
| 10 | Peru        | Adverse effects of medical treatment            | 0 (0 to 0)     | 0 (0 to 0)     | 0% (0% to 0%)             |
| 11 | Peru        | Conflict and terrorism                          | 65 (26 to 148) | 0 (0 to 0)     | NA                        |
| 12 | Peru        | Cyclist road injuries                           | 12 (8 to 16)   | 11 (8 to 16)   | -2.4% (-10.3% to 7.5%)    |
| 13 | Peru        | Drowning                                        | 0 (0 to 1)     | 0 (0 to 1)     | 22.7% (5.3% to 41.3%)     |
| 14 | Peru        | Environmental heat and cold exposure            | 9 (7 to 13)    | 9 (6 to 12)    | -3.9% (-8.3% to 0.7%)     |
| 15 | Peru        | Executions and police conflict                  | 0 (0 to 0)     | 0 (0 to 0)     | NA                        |
| 16 | Peru        | Exposure to forces of nature                    | 2 (1 to 5)     | 1 (0 to 1)     | NA                        |
| 17 | Peru        | Falls                                           | 54 (42 to 71)  | 81 (63 to 106) | 49.3% (43.2% to 55.3%)    |
| 18 | Peru        | Fire, heat, and hot substances                  | 3 (2 to 5)     | 3 (2 to 5)     | -10.7% (-19.8% to -3%)    |
| 19 | Peru        | Foreign body in eyes                            | 0 (0 to 0)     | 0 (0 to 0)     | 0.2% (-0.1% to 0.6%)      |
| 20 | Peru        | Foreign body in other body part                 | 3 (2 to 7)     | 2 (1 to 5)     | -33.7% (-41.6% to -25.2%) |
| 21 | Peru        | Motor vehicle road injuries                     | 18 (13 to 23)  | 15 (11 to 20)  | -14.2% (-21.5% to -5.6%)  |
| 22 | Peru        | Motorcyclist road injuries                      | 7 (5 to 9)     | 8 (6 to 11)    | 24.3% (13.8% to 36.8%)    |
| 23 | Peru        | Non-venomous animal contact                     | 3 (2 to 6)     | 3 (2 to 5)     | -9.4% (-15% to -4.1%)     |
| 24 | Peru        | Other exposure to mechanical forces             | 34 (20 to 55)  | 35 (21 to 56)  | 2.8% (-4.7% to 10.1%)     |
| 25 | Peru        | Other road injuries                             | 3 (2 to 5)     | 3 (2 to 4)     | -1.7% (-10.4% to 8.8%)    |
| 26 | Peru        | Other transport injuries                        | 5 (4 to 6)     | 5 (4 to 6)     | -1.2% (-6.9% to 5.5%)     |
| 27 | Peru        | Other unintentional injuries                    | 23 (16 to 36)  | 17 (11 to 27)  | -27.5% (-34.1% to -20.2%) |
| 28 | Peru        | Pedestrian road injuries                        | 19 (15 to 23)  | 16 (12 to 20)  | -15.1% (-22.3% to -7.6%)  |
| 29 | Peru        | Physical violence by firearm                    | 0 (0 to 0)     | 1 (0 to 1)     | 112.9% (86.2% to 143.2%)  |
| 30 | Peru        | Physical violence by other means                | 9 (6 to 13)    | 8 (5 to 11)    | -16% (-22.9% to -9.1%)    |
| 31 | Peru        | Physical violence by sharp object               | 2 (1 to 3)     | 2 (1 to 3)     | -3.9% (-14.6% to 7.3%)    |
| 32 | Peru        | Poisoning by carbon monoxide                    | 0 (0 to 0)     | 0 (0 to 0)     | 40.7% (22.2% to 59.9%)    |
| 33 | Peru        | Poisoning by other means                        | 0 (0 to 0)     | 0 (0 to 0)     | -9.8% (-19.2% to -1.1%)   |
| 34 | Peru        | Pulmonary aspiration and foreign body in airway | 2 (1 to 4)     | 1 (0 to 1)     | -65.6% (-70.9% to -58.8%) |
| 35 | Peru        | Self-harm by firearm                            | 0 (0 to 0)     | 0 (0 to 0)     | 37.9% (23.2% to 54.7%)    |
| 36 | Peru        | Self-harm by other specified means              | 0 (0 to 1)     | 0 (0 to 1)     | 1.2% (-7.1% to 9.5%)      |
| 37 | Peru        | Unintentional firearm injuries                  | 5 (3 to 8)     | 4 (3 to 7)     | -19.6% (-27.9% to -10.6%) |
| 38 | Peru        | Venomous animal contact                         | 6 (3 to 10)    | 5 (3 to 9)     | -9.3% (-13.6% to -5%)     |
| 39 | Philippines | Adverse effects of medical treatment            | 0 (0 to 0)     | 0 (0 to 0)     | 0% (0% to 0%)             |
| 40 | Philippines | Conflict and terrorism                          | 14 (6 to 32)   | 2 (1 to 4)     | NA                        |
| 41 | Philippines | Cyclist road injuries                           | 15 (10 to 22)  | 13 (9 to 19)   | -10.8% (-13.9% to -7.5%)  |
| 42 | Philippines | Drowning                                        | 1 (0 to 1)     | 0 (0 to 1)     | -40.1% (-42.8% to -37.5%) |
| 43 | Philippines | Environmental heat and cold exposure            | 2 (1 to 2)     | 2 (1 to 2)     | -9.8% (-11.8% to -7.8%)   |
| 44 | Philippines | Executions and police conflict                  | 0 (0 to 0)     | 1 (1 to 2)     | NA                        |
| 45 |             |                                                 |                |                |                           |
| 46 |             |                                                 |                |                |                           |

|    |             |                                                 |                  |                  |                           |
|----|-------------|-------------------------------------------------|------------------|------------------|---------------------------|
| 1  |             |                                                 |                  |                  |                           |
| 2  | Philippines | Exposure to forces of nature                    | 29 (18 to 50)    | 0 (0 to 0)       | NA                        |
| 3  | Philippines | Falls                                           | 57 (44 to 74)    | 69 (54 to 88)    | 21.3% (18.9% to 23.7%)    |
| 4  | Philippines | Fire, heat, and hot substances                  | 1 (1 to 2)       | 1 (1 to 2)       | -1.4% (-4.9% to 1.1%)     |
| 5  | Philippines | Foreign body in eyes                            | 0 (0 to 0)       | 0 (0 to 0)       | 0.1% (-4.4% to 5.4%)      |
| 6  | Philippines | Foreign body in other body part                 | 1 (1 to 2)       | 1 (1 to 2)       | 0.2% (-3.1% to 2.7%)      |
| 7  | Philippines | Motor vehicle road injuries                     | 20 (14 to 28)    | 19 (13 to 26)    | -4.2% (-7.1% to -1.4%)    |
| 8  | Philippines | Motorcyclist road injuries                      | 27 (20 to 36)    | 32 (25 to 42)    | 20.6% (16.7% to 25.2%)    |
| 9  | Philippines | Non-venomous animal contact                     | 8 (5 to 13)      | 7 (4 to 12)      | -8% (-11.8% to -2.9%)     |
| 10 | Philippines | Other exposure to mechanical forces             | 15 (9 to 25)     | 15 (8 to 25)     | 1.3% (-3% to 4.8%)        |
| 11 | Philippines | Other road injuries                             | 2 (1 to 3)       | 1 (1 to 2)       | -10.8% (-14.3% to -7.4%)  |
| 12 | Philippines | Other transport injuries                        | 5 (3 to 6)       | 4 (3 to 6)       | -4.7% (-8.6% to -1.5%)    |
| 13 | Philippines | Other unintentional injuries                    | 9 (6 to 15)      | 8 (5 to 13)      | -13% (-15.8% to -10.6%)   |
| 14 | Philippines | Pedestrian road injuries                        | 14 (10 to 18)    | 11 (8 to 15)     | -20.3% (-22.9% to -17.7%) |
| 15 | Philippines | Physical violence by firearm                    | 3 (2 to 4)       | 3 (2 to 4)       | -4.5% (-10.3% to 0.9%)    |
| 16 | Philippines | Physical violence by other means                | 47 (31 to 69)    | 35 (24 to 51)    | -24.8% (-27.3% to -22%)   |
| 17 | Philippines | Physical violence by sharp object               | 21 (13 to 32)    | 16 (10 to 24)    | -25% (-28.1% to -21.3%)   |
| 18 | Philippines | Poisoning by carbon monoxide                    | 0 (0 to 0)       | 0 (0 to 0)       | 16.5% (12.7% to 20.8%)    |
| 19 | Philippines | Poisoning by other means                        | 0 (0 to 0)       | 0 (0 to 0)       | 19.1% (15.4% to 22.9%)    |
| 20 | Philippines | Pulmonary aspiration and foreign body in airway | 0 (0 to 0)       | 0 (0 to 0)       | -34.1% (-37.6% to -30.2%) |
| 21 | Philippines | Self-harm by firearm                            | 0 (0 to 0)       | 0 (0 to 0)       | -19.7% (-27.2% to -12.5%) |
| 22 | Philippines | Self-harm by other specified means              | 1 (1 to 2)       | 1 (1 to 1)       | -9.3% (-11% to -7.3%)     |
| 23 | Philippines | Unintentional firearm injuries                  | 1 (1 to 2)       | 2 (1 to 4)       | 61.1% (49.9% to 73.6%)    |
| 24 | Philippines | Venomous animal contact                         | 1 (0 to 3)       | 1 (0 to 2)       | -41.1% (-47.5% to -35.1%) |
| 25 | Poland      | Adverse effects of medical treatment            | 0 (0 to 0)       | 0 (0 to 0)       | 0% (0% to 0%)             |
| 26 | Poland      | Conflict and terrorism                          | 0 (0 to 0)       | 0 (0 to 0)       | NA                        |
| 27 | Poland      | Cyclist road injuries                           | 80 (56 to 111)   | 66 (47 to 92)    | -17.2% (-20.6% to -13.3%) |
| 28 | Poland      | Drowning                                        | 0 (0 to 1)       | 0 (0 to 1)       | -16.9% (-24.8% to -8.1%)  |
| 29 | Poland      | Environmental heat and cold exposure            | 2 (2 to 3)       | 1 (1 to 1)       | -64.1% (-72.4% to -53.4%) |
| 30 | Poland      | Executions and police conflict                  | 0 (0 to 0)       | 0 (0 to 0)       | NA                        |
| 31 | Poland      | Exposure to forces of nature                    | 0 (0 to 0)       | 0 (0 to 0)       | NA                        |
| 32 | Poland      | Falls                                           | 271 (212 to 354) | 305 (238 to 396) | 12.6% (9.2% to 16.2%)     |
| 33 | Poland      | Fire, heat, and hot substances                  | 4 (3 to 7)       | 4 (2 to 6)       | -13% (-16.6% to -9.4%)    |
| 34 | Poland      | Foreign body in eyes                            | 0 (0 to 0)       | 0 (0 to 0)       | 0.6% (0.2% to 1.1%)       |
| 35 | Poland      | Foreign body in other body part                 | 3 (1 to 6)       | 3 (1 to 6)       | -6% (-8.3% to -4%)        |
| 36 | Poland      | Motor vehicle road injuries                     | 125 (88 to 165)  | 108 (79 to 143)  | -13.2% (-16.9% to -9.2%)  |
| 37 | Poland      | Motorcyclist road injuries                      | 26 (19 to 36)    | 21 (15 to 29)    | -21.4% (-25.4% to -16.9%) |
| 38 | Poland      | Non-venomous animal contact                     | 7 (4 to 13)      | 6 (3 to 10)      | -22% (-23.7% to -20.4%)   |
| 39 | Poland      | Other exposure to mechanical forces             | 144 (89 to 227)  | 128 (78 to 201)  | -11% (-14.6% to -7.2%)    |
| 40 | Poland      | Other road injuries                             | 3 (2 to 5)       | 2 (1 to 3)       | -41.7% (-48% to -35.9%)   |
| 41 | Poland      | Other transport injuries                        | 10 (8 to 13)     | 7 (5 to 9)       | -31.6% (-35.5% to -27.9%) |
| 42 | Poland      | Other unintentional injuries                    | 46 (29 to 75)    | 29 (18 to 49)    | -36.6% (-42.1% to -32.2%) |
| 43 | Poland      | Pedestrian road injuries                        | 78 (58 to 99)    | 31 (22 to 40)    | -60.6% (-62.6% to -58.4%) |
| 44 | Poland      | Physical violence by firearm                    | 0 (0 to 0)       | 0 (0 to 1)       | 60.4% (45.6% to 75.3%)    |
| 45 |             |                                                 |                  |                  |                           |
| 46 |             |                                                 |                  |                  |                           |

|    |             |                                                 |                  |                  |                           |
|----|-------------|-------------------------------------------------|------------------|------------------|---------------------------|
| 1  |             |                                                 |                  |                  |                           |
| 2  | Poland      | Physical violence by other means                | 31 (22 to 44)    | 22 (15 to 31)    | -28.1% (-33% to -22.7%)   |
| 3  | Poland      | Physical violence by sharp object               | 3 (2 to 4)       | 2 (1 to 3)       | -34.6% (-44.6% to -25%)   |
| 4  | Poland      | Poisoning by carbon monoxide                    | 0 (0 to 0)       | 0 (0 to 0)       | -7% (-19.4% to 5.2%)      |
| 5  | Poland      | Poisoning by other means                        | 1 (0 to 1)       | 0 (0 to 1)       | -23.4% (-32.1% to -14%)   |
| 6  | Poland      | Pulmonary aspiration and foreign body in airway | 1 (1 to 2)       | 1 (1 to 2)       | -34% (-40.1% to -28.3%)   |
| 7  | Poland      | Self-harm by firearm                            | 0 (0 to 1)       | 1 (0 to 1)       | 12.1% (5.6% to 18.7%)     |
| 8  | Poland      | Self-harm by other specified means              | 4 (2 to 6)       | 4 (2 to 6)       | -1.4% (-4.2% to 1.3%)     |
| 9  | Poland      | Unintentional firearm injuries                  | 1 (1 to 2)       | 1 (1 to 2)       | 0.9% (-4% to 5.2%)        |
| 10 | Poland      | Venomous animal contact                         | 6 (3 to 11)      | 5 (2 to 9)       | -20.7% (-22.3% to -19.2%) |
| 11 | Portugal    | Adverse effects of medical treatment            | 0 (0 to 0)       | 0 (0 to 0)       | 0% (0% to 0%)             |
| 12 | Portugal    | Conflict and terrorism                          | 0 (0 to 0)       | 0 (0 to 0)       | NA                        |
| 13 | Portugal    | Cyclist road injuries                           | 31 (23 to 42)    | 15 (11 to 19)    | -53.1% (-60.2% to -45.6%) |
| 14 | Portugal    | Drowning                                        | 0 (0 to 0)       | 0 (0 to 0)       | 40.5% (21.8% to 61.2%)    |
| 15 | Portugal    | Environmental heat and cold exposure            | 2 (1 to 3)       | 2 (1 to 3)       | -3.3% (-7.6% to 1.7%)     |
| 16 | Portugal    | Executions and police conflict                  | 0 (0 to 0)       | 0 (0 to 0)       | NA                        |
| 17 | Portugal    | Exposure to forces of nature                    | 0 (0 to 0)       | 0 (0 to 0)       | NA                        |
| 18 | Portugal    | Falls                                           | 187 (146 to 242) | 159 (125 to 202) | -15.1% (-20.8% to -9%)    |
| 19 | Portugal    | Fire, heat, and hot substances                  | 2 (1 to 3)       | 2 (1 to 3)       | -16% (-22.7% to -9.4%)    |
| 20 | Portugal    | Foreign body in eyes                            | 0 (0 to 0)       | 0 (0 to 0)       | 0.3% (-3.9% to 5.9%)      |
| 21 | Portugal    | Foreign body in other body part                 | 2 (1 to 3)       | 2 (1 to 3)       | 4.3% (-2.1% to 11.1%)     |
| 22 | Portugal    | Motor vehicle road injuries                     | 34 (25 to 45)    | 14 (10 to 18)    | -59.9% (-66.4% to -53.3%) |
| 23 | Portugal    | Motorcyclist road injuries                      | 9 (6 to 12)      | 7 (5 to 9)       | -23.5% (-36.3% to -9.8%)  |
| 24 | Portugal    | Non-venomous animal contact                     | 2 (1 to 3)       | 2 (1 to 3)       | -7% (-12.1% to -0.3%)     |
| 25 | Portugal    | Other exposure to mechanical forces             | 50 (31 to 79)    | 36 (21 to 59)    | -28.5% (-37.2% to -19.2%) |
| 26 | Portugal    | Other road injuries                             | 2 (1 to 3)       | 1 (1 to 2)       | -40.4% (-50.3% to -30.3%) |
| 27 | Portugal    | Other transport injuries                        | 8 (6 to 10)      | 8 (6 to 10)      | -0.4% (-6.9% to 5.8%)     |
| 28 | Portugal    | Other unintentional injuries                    | 28 (18 to 43)    | 20 (13 to 32)    | -27.3% (-34.3% to -21%)   |
| 29 | Portugal    | Pedestrian road injuries                        | 31 (25 to 40)    | 5 (4 to 6)       | -84.3% (-87.1% to -80.9%) |
| 30 | Portugal    | Physical violence by firearm                    | 0 (0 to 1)       | 1 (0 to 1)       | 33% (12% to 58.2%)        |
| 31 | Portugal    | Physical violence by other means                | 22 (16 to 30)    | 13 (9 to 19)     | -39.2% (-45.6% to -31.5%) |
| 32 | Portugal    | Physical violence by sharp object               | 1 (1 to 2)       | 1 (1 to 2)       | -17.7% (-30.3% to -4.1%)  |
| 33 | Portugal    | Poisoning by carbon monoxide                    | 0 (0 to 0)       | 0 (0 to 0)       | 32.9% (21.6% to 45.6%)    |
| 34 | Portugal    | Poisoning by other means                        | 0 (0 to 0)       | 0 (0 to 0)       | -9.7% (-16.2% to -2.6%)   |
| 35 | Portugal    | Pulmonary aspiration and foreign body in airway | 1 (1 to 2)       | 1 (0 to 1)       | -27.6% (-35.5% to -19%)   |
| 36 | Portugal    | Self-harm by firearm                            | 0 (0 to 1)       | 0 (0 to 1)       | 3.3% (-10.4% to 19.1%)    |
| 37 | Portugal    | Self-harm by other specified means              | 3 (2 to 4)       | 2 (1 to 3)       | -34.1% (-38.5% to -29.6%) |
| 38 | Portugal    | Unintentional firearm injuries                  | 1 (1 to 2)       | 1 (1 to 2)       | -23.1% (-34.8% to -12.2%) |
| 39 | Portugal    | Venomous animal contact                         | 1 (1 to 3)       | 1 (1 to 2)       | -7.8% (-13% to -2%)       |
| 40 | Puerto Rico | Adverse effects of medical treatment            | 0 (0 to 0)       | 0 (0 to 0)       | 0% (0% to 0%)             |
| 41 | Puerto Rico | Conflict and terrorism                          | 0 (0 to 0)       | 0 (0 to 0)       | NA                        |
| 42 | Puerto Rico | Cyclist road injuries                           | 24 (15 to 35)    | 18 (11 to 27)    | -24.2% (-34% to -13.7%)   |
| 43 | Puerto Rico | Drowning                                        | 0 (0 to 0)       | 0 (0 to 0)       | 49.5% (31.8% to 70.2%)    |
| 44 | Puerto Rico | Environmental heat and cold exposure            | 1 (1 to 3)       | 1 (1 to 3)       | 5.1% (1% to 9.6%)         |
| 45 |             |                                                 |                  |                  |                           |
| 46 |             |                                                 |                  |                  |                           |

|    |             |                                                 |                  |                  |                           |
|----|-------------|-------------------------------------------------|------------------|------------------|---------------------------|
| 1  |             |                                                 |                  |                  |                           |
| 2  | Puerto Rico | Executions and police conflict                  | 0 (0 to 0)       | 0 (0 to 0)       | NA                        |
| 3  | Puerto Rico | Exposure to forces of nature                    | 0 (0 to 0)       | 0 (0 to 0)       | NA                        |
| 4  | Puerto Rico | Falls                                           | 42 (27 to 63)    | 56 (36 to 86)    | 34.5% (29.1% to 40.5%)    |
| 5  | Puerto Rico | Fire, heat, and hot substances                  | 1 (0 to 1)       | 1 (0 to 1)       | 4.8% (-1.6% to 10.9%)     |
| 6  | Puerto Rico | Foreign body in eyes                            | 0 (0 to 0)       | 0 (0 to 0)       | -0.1% (-0.3% to 0.1%)     |
| 7  | Puerto Rico | Foreign body in other body part                 | 2 (1 to 3)       | 2 (1 to 4)       | 7.9% (0.6% to 16%)        |
| 8  | Puerto Rico | Motor vehicle road injuries                     | 48 (33 to 67)    | 24 (16 to 35)    | -49.2% (-56.4% to -41.7%) |
| 9  | Puerto Rico | Motorcyclist road injuries                      | 20 (14 to 28)    | 26 (19 to 34)    | 28.3% (10.3% to 49.7%)    |
| 10 | Puerto Rico | Non-venomous animal contact                     | 2 (1 to 4)       | 2 (1 to 3)       | -8.9% (-14% to -3.7%)     |
| 11 | Puerto Rico | Other exposure to mechanical forces             | 53 (26 to 99)    | 61 (31 to 113)   | 15.3% (8.8% to 20.9%)     |
| 12 | Puerto Rico | Other road injuries                             | 6 (3 to 11)      | 5 (2 to 9)       | -17.5% (-28% to -5.3%)    |
| 13 | Puerto Rico | Other transport injuries                        | 3 (2 to 4)       | 3 (2 to 4)       | -5.6% (-13% to 2.2%)      |
| 14 | Puerto Rico | Other unintentional injuries                    | 5 (3 to 9)       | 5 (3 to 9)       | -5.5% (-12.8% to 0.5%)    |
| 15 | Puerto Rico | Pedestrian road injuries                        | 34 (25 to 46)    | 17 (12 to 24)    | -48.6% (-55.1% to -41.6%) |
| 16 | Puerto Rico | Physical violence by firearm                    | 7 (5 to 11)      | 10 (6 to 15)     | 30.9% (5.5% to 62.9%)     |
| 17 | Puerto Rico | Physical violence by other means                | 18 (11 to 28)    | 16 (9 to 25)     | -11.2% (-22.6% to 2.2%)   |
| 18 | Puerto Rico | Physical violence by sharp object               | 5 (3 to 10)      | 4 (2 to 8)       | -18.7% (-31.7% to -4.6%)  |
| 19 | Puerto Rico | Poisoning by carbon monoxide                    | 0 (0 to 0)       | 0 (0 to 0)       | -27.3% (-43% to -13.5%)   |
| 20 | Puerto Rico | Poisoning by other means                        | 0 (0 to 0)       | 0 (0 to 0)       | -58.2% (-67% to -47.7%)   |
| 21 | Puerto Rico | Pulmonary aspiration and foreign body in airway | 0 (0 to 0)       | 0 (0 to 0)       | -17.3% (-25.4% to -7.7%)  |
| 22 | Puerto Rico | Self-harm by firearm                            | 0 (0 to 0)       | 0 (0 to 0)       | -31.8% (-37.7% to -26.1%) |
| 23 | Puerto Rico | Self-harm by other specified means              | 0 (0 to 0)       | 0 (0 to 0)       | -17.8% (-27.3% to -8%)    |
| 24 | Puerto Rico | Unintentional firearm injuries                  | 2 (1 to 4)       | 2 (1 to 5)       | 13.8% (2.3% to 25.9%)     |
| 25 | Puerto Rico | Venomous animal contact                         | 1 (0 to 3)       | 1 (0 to 3)       | -8.5% (-14% to -2.5%)     |
| 26 | Qatar       | Adverse effects of medical treatment            | 0 (0 to 0)       | 0 (0 to 0)       | 0% (0% to 0%)             |
| 27 | Qatar       | Conflict and terrorism                          | 0 (0 to 0)       | 0 (0 to 0)       | NA                        |
| 28 | Qatar       | Cyclist road injuries                           | 28 (20 to 39)    | 18 (13 to 25)    | -36.6% (-43.3% to -28.7%) |
| 29 | Qatar       | Drowning                                        | 0 (0 to 0)       | 0 (0 to 1)       | 63.7% (39.1% to 91.9%)    |
| 30 | Qatar       | Environmental heat and cold exposure            | 4 (3 to 6)       | 4 (3 to 6)       | -4.6% (-10.9% to 0.7%)    |
| 31 | Qatar       | Executions and police conflict                  | 0 (0 to 0)       | 0 (0 to 0)       | NA                        |
| 32 | Qatar       | Exposure to forces of nature                    | 0 (0 to 0)       | 0 (0 to 0)       | NA                        |
| 33 | Qatar       | Falls                                           | 141 (109 to 185) | 173 (133 to 228) | 22.1% (16.1% to 28.6%)    |
| 34 | Qatar       | Fire, heat, and hot substances                  | 1 (1 to 2)       | 1 (0 to 1)       | -35.7% (-42.5% to -27.8%) |
| 35 | Qatar       | Foreign body in eyes                            | 0 (0 to 0)       | 0 (0 to 0)       | 4.2% (1.9% to 7.2%)       |
| 36 | Qatar       | Foreign body in other body part                 | 1 (1 to 3)       | 1 (1 to 3)       | -0.4% (-5% to 4.2%)       |
| 37 | Qatar       | Motor vehicle road injuries                     | 79 (61 to 99)    | 53 (42 to 67)    | -32.3% (-38.3% to -25.5%) |
| 38 | Qatar       | Motorcyclist road injuries                      | 13 (10 to 17)    | 9 (7 to 12)      | -29% (-37.1% to -19.5%)   |
| 39 | Qatar       | Non-venomous animal contact                     | 2 (1 to 4)       | 2 (1 to 4)       | -0.5% (-6.1% to 6.3%)     |
| 40 | Qatar       | Other exposure to mechanical forces             | 48 (30 to 74)    | 37 (23 to 56)    | -23.7% (-29.7% to -18%)   |
| 41 | Qatar       | Other road injuries                             | 2 (1 to 4)       | 2 (1 to 3)       | -14.7% (-24.5% to -3%)    |
| 42 | Qatar       | Other transport injuries                        | 10 (8 to 13)     | 7 (6 to 9)       | -26.5% (-33.2% to -19.5%) |
| 43 | Qatar       | Other unintentional injuries                    | 21 (14 to 35)    | 18 (12 to 30)    | -13.6% (-19.4% to -7.2%)  |
| 44 | Qatar       | Pedestrian road injuries                        | 43 (33 to 54)    | 26 (20 to 33)    | -38.4% (-44.4% to -31.6%) |
| 45 |             |                                                 |                  |                  |                           |
| 46 |             |                                                 |                  |                  |                           |

|    |                     |                                                 |                  |                  |                           |
|----|---------------------|-------------------------------------------------|------------------|------------------|---------------------------|
| 1  |                     |                                                 |                  |                  |                           |
| 2  | Qatar               | Physical violence by firearm                    | 0 (0 to 0)       | 1 (0 to 1)       | 161.8% (124.2% to 200.8%) |
| 3  | Qatar               | Physical violence by other means                | 12 (9 to 17)     | 13 (9 to 19)     | 6.3% (-0.2% to 12.7%)     |
| 4  | Qatar               | Physical violence by sharp object               | 2 (1 to 3)       | 2 (1 to 3)       | 19.7% (8% to 36.5%)       |
| 5  | Qatar               | Poisoning by carbon monoxide                    | 0 (0 to 0)       | 0 (0 to 0)       | 35% (22.6% to 49.8%)      |
| 6  | Qatar               | Poisoning by other means                        | 0 (0 to 0)       | 0 (0 to 0)       | -10.6% (-17.3% to -3.4%)  |
| 7  | Qatar               | Pulmonary aspiration and foreign body in airway | 0 (0 to 1)       | 0 (0 to 1)       | -20.1% (-30.8% to -6.9%)  |
| 8  | Qatar               | Self-harm by firearm                            | 0 (0 to 0)       | 0 (0 to 0)       | 42.6% (20.8% to 68.2%)    |
| 9  | Qatar               | Self-harm by other specified means              | 1 (1 to 2)       | 1 (1 to 2)       | -1.8% (-9.6% to 5.9%)     |
| 10 | Qatar               | Unintentional firearm injuries                  | 2 (1 to 3)       | 2 (1 to 3)       | 1.5% (-8.1% to 13.1%)     |
| 11 | Qatar               | Venomous animal contact                         | 1 (0 to 2)       | 1 (0 to 2)       | -1.9% (-8.3% to 5.7%)     |
| 12 | Republic of Korea   | Adverse effects of medical treatment            | 0 (0 to 0)       | 0 (0 to 0)       | 0% (0% to 0%)             |
| 13 | Republic of Korea   | Conflict and terrorism                          | 0 (0 to 1)       | 0 (0 to 0)       | NA                        |
| 14 | Republic of Korea   | Cyclist road injuries                           | 34 (25 to 45)    | 19 (14 to 26)    | -43.1% (-50.7% to -34.2%) |
| 15 | Republic of Korea   | Drowning                                        | 0 (0 to 0)       | 1 (0 to 1)       | 129.8% (98.6% to 164.4%)  |
| 16 | Republic of Korea   | Environmental heat and cold exposure            | 4 (3 to 5)       | 3 (2 to 5)       | -8.2% (-13.7% to -3%)     |
| 17 | Republic of Korea   | Executions and police conflict                  | 0 (0 to 0)       | 0 (0 to 0)       | NA                        |
| 18 | Republic of Korea   | Exposure to forces of nature                    | 0 (0 to 1)       | 0 (0 to 0)       | NA                        |
| 19 | Republic of Korea   | Falls                                           | 205 (160 to 262) | 223 (175 to 284) | 8.9% (2.4% to 15.9%)      |
| 20 | Republic of Korea   | Fire, heat, and hot substances                  | 4 (2 to 6)       | 3 (2 to 5)       | -16.3% (-25.6% to -7.6%)  |
| 21 | Republic of Korea   | Foreign body in eyes                            | 0 (0 to 0)       | 0 (0 to 0)       | 1.3% (0.4% to 2.7%)       |
| 22 | Republic of Korea   | Foreign body in other body part                 | 2 (1 to 5)       | 3 (1 to 5)       | 9.1% (4.2% to 13.7%)      |
| 23 | Republic of Korea   | Motor vehicle road injuries                     | 47 (36 to 60)    | 25 (18 to 32)    | -46.5% (-53.4% to -38.5%) |
| 24 | Republic of Korea   | Motorcyclist road injuries                      | 24 (19 to 31)    | 12 (9 to 16)     | -50.3% (-57.5% to -41.8%) |
| 25 | Republic of Korea   | Non-venomous animal contact                     | 6 (3 to 11)      | 6 (3 to 10)      | -6.5% (-11.2% to -1.5%)   |
| 26 | Republic of Korea   | Other exposure to mechanical forces             | 72 (45 to 114)   | 73 (44 to 116)   | 0.7% (-8.8% to 9.7%)      |
| 27 | Republic of Korea   | Other road injuries                             | 2 (1 to 3)       | 1 (1 to 2)       | -32.4% (-44.2% to -18.9%) |
| 28 | Republic of Korea   | Other transport injuries                        | 10 (8 to 12)     | 7 (6 to 10)      | -24% (-32.7% to -13.3%)   |
| 29 | Republic of Korea   | Other unintentional injuries                    | 47 (32 to 74)    | 34 (22 to 55)    | -27.8% (-35.9% to -20%)   |
| 30 | Republic of Korea   | Pedestrian road injuries                        | 27 (21 to 34)    | 11 (8 to 14)     | -59.5% (-64% to -54.2%)   |
| 31 | Republic of Korea   | Physical violence by firearm                    | 0 (0 to 0)       | 1 (0 to 1)       | 106.4% (81.9% to 139.1%)  |
| 32 | Republic of Korea   | Physical violence by other means                | 15 (10 to 21)    | 13 (9 to 19)     | -12.8% (-20.9% to -3.6%)  |
| 33 | Republic of Korea   | Physical violence by sharp object               | 2 (1 to 3)       | 1 (1 to 2)       | -35% (-46% to -24.1%)     |
| 34 | Republic of Korea   | Poisoning by carbon monoxide                    | 0 (0 to 0)       | 0 (0 to 0)       | -27% (-39.8% to -11.9%)   |
| 35 | Republic of Korea   | Poisoning by other means                        | 0 (0 to 1)       | 0 (0 to 1)       | -22.6% (-33.1% to -12.1%) |
| 36 | Republic of Korea   | Pulmonary aspiration and foreign body in airway | 1 (0 to 1)       | 0 (0 to 1)       | -41.6% (-48.8% to -34.5%) |
| 37 | Republic of Korea   | Self-harm by firearm                            | 0 (0 to 0)       | 0 (0 to 1)       | 69.3% (33.8% to 110.6%)   |
| 38 | Republic of Korea   | Self-harm by other specified means              | 3 (2 to 5)       | 6 (4 to 9)       | 77.1% (63.8% to 91.3%)    |
| 39 | Republic of Korea   | Unintentional firearm injuries                  | 1 (1 to 2)       | 1 (1 to 2)       | 22.4% (8.1% to 37%)       |
| 40 | Republic of Korea   | Venomous animal contact                         | 3 (1 to 6)       | 3 (1 to 5)       | -13.9% (-19.5% to -8.9%)  |
| 41 | Republic of Moldova | Adverse effects of medical treatment            | 0 (0 to 0)       | 0 (0 to 0)       | 0% (0% to 0%)             |
| 42 | Republic of Moldova | Conflict and terrorism                          | 0 (0 to 0)       | 0 (0 to 0)       | NA                        |
| 43 | Republic of Moldova | Cyclist road injuries                           | 65 (46 to 87)    | 41 (29 to 57)    | -36.1% (-42.9% to -28.1%) |
| 44 | Republic of Moldova | Drowning                                        | 1 (0 to 1)       | 1 (0 to 1)       | 10.5% (0.7% to 22%)       |
| 45 |                     |                                                 |                  |                  |                           |
| 46 |                     |                                                 |                  |                  |                           |

|    |                     |                                                 |                  |                  |                           |
|----|---------------------|-------------------------------------------------|------------------|------------------|---------------------------|
| 1  |                     |                                                 |                  |                  |                           |
| 2  | Republic of Moldova | Environmental heat and cold exposure            | 10 (7 to 14)     | 11 (8 to 15)     | 12.3% (3.9% to 21.6%)     |
| 3  | Republic of Moldova | Executions and police conflict                  | 0 (0 to 0)       | 0 (0 to 0)       | NA                        |
| 4  | Republic of Moldova | Exposure to forces of nature                    | 0 (0 to 0)       | 0 (0 to 0)       | NA                        |
| 5  | Republic of Moldova | Falls                                           | 220 (172 to 282) | 190 (146 to 248) | -13.6% (-18.6% to -7.7%)  |
| 6  | Republic of Moldova | Fire, heat, and hot substances                  | 4 (2 to 7)       | 3 (2 to 5)       | -21.3% (-29.6% to -13.8%) |
| 7  | Republic of Moldova | Foreign body in eyes                            | 0 (0 to 0)       | 0 (0 to 0)       | 1.2% (0.7% to 1.9%)       |
| 8  | Republic of Moldova | Foreign body in other body part                 | 2 (1 to 4)       | 2 (1 to 4)       | 1.3% (-3.8% to 7.2%)      |
| 9  | Republic of Moldova | Motor vehicle road injuries                     | 141 (109 to 176) | 98 (76 to 122)   | -30.7% (-38.8% to -22.1%) |
| 10 | Republic of Moldova | Motorcyclist road injuries                      | 23 (17 to 29)    | 11 (8 to 15)     | -49.3% (-57.7% to -40.1%) |
| 11 | Republic of Moldova | Non-venomous animal contact                     | 5 (3 to 8)       | 5 (3 to 8)       | 0.3% (-4.5% to 5.2%)      |
| 12 | Republic of Moldova | Other exposure to mechanical forces             | 83 (52 to 133)   | 69 (41 to 110)   | -17.5% (-25.8% to -9.5%)  |
| 13 | Republic of Moldova | Other road injuries                             | 4 (2 to 6)       | 2 (1 to 4)       | -39.8% (-47.4% to -31.2%) |
| 14 | Republic of Moldova | Other transport injuries                        | 7 (5 to 8)       | 5 (4 to 7)       | -18.2% (-24.9% to -11.3%) |
| 15 | Republic of Moldova | Other unintentional injuries                    | 41 (26 to 65)    | 24 (15 to 39)    | -40.8% (-47.2% to -33.1%) |
| 16 | Republic of Moldova | Pedestrian road injuries                        | 79 (62 to 99)    | 35 (27 to 45)    | -55.4% (-60.5% to -50.1%) |
| 17 | Republic of Moldova | Physical violence by firearm                    | 0 (0 to 0)       | 0 (0 to 0)       | 18.6% (-7.6% to 47.6%)    |
| 18 | Republic of Moldova | Physical violence by other means                | 42 (30 to 59)    | 24 (17 to 33)    | -43% (-50.2% to -33.6%)   |
| 19 | Republic of Moldova | Physical violence by sharp object               | 5 (3 to 7)       | 3 (2 to 6)       | -24.6% (-38.4% to -10.7%) |
| 20 | Republic of Moldova | Poisoning by carbon monoxide                    | 0 (0 to 0)       | 0 (0 to 0)       | -2.9% (-11.8% to 6.9%)    |
| 21 | Republic of Moldova | Poisoning by other means                        | 0 (0 to 1)       | 0 (0 to 1)       | -27.1% (-35.2% to -18.9%) |
| 22 | Republic of Moldova | Pulmonary aspiration and foreign body in airway | 1 (1 to 2)       | 1 (1 to 2)       | -5.1% (-11.6% to 2.9%)    |
| 23 | Republic of Moldova | Self-harm by firearm                            | 1 (0 to 1)       | 1 (0 to 1)       | 0.6% (-13.7% to 16.7%)    |
| 24 | Republic of Moldova | Self-harm by other specified means              | 3 (2 to 5)       | 3 (2 to 4)       | -11.2% (-16.3% to -5.5%)  |
| 25 | Republic of Moldova | Unintentional firearm injuries                  | 1 (1 to 2)       | 1 (0 to 2)       | -18.6% (-29.9% to -6.3%)  |
| 26 | Republic of Moldova | Venomous animal contact                         | 4 (2 to 7)       | 4 (2 to 7)       | 4.7% (-0.5% to 10.8%)     |
| 27 | Romania             | Adverse effects of medical treatment            | 0 (0 to 0)       | 0 (0 to 0)       | 0% (0% to 0%)             |
| 28 | Romania             | Conflict and terrorism                          | 2 (1 to 5)       | 0 (0 to 0)       | NA                        |
| 29 | Romania             | Cyclist road injuries                           | 58 (43 to 77)    | 49 (36 to 65)    | -16.2% (-25.2% to -5.3%)  |
| 30 | Romania             | Drowning                                        | 0 (0 to 1)       | 0 (0 to 1)       | 24.8% (9.7% to 40.2%)     |
| 31 | Romania             | Environmental heat and cold exposure            | 3 (2 to 4)       | 2 (2 to 3)       | -17.3% (-21.9% to -12.8%) |
| 32 | Romania             | Executions and police conflict                  | 0 (0 to 0)       | 0 (0 to 0)       | NA                        |
| 33 | Romania             | Exposure to forces of nature                    | 0 (0 to 0)       | 0 (0 to 0)       | NA                        |
| 34 | Romania             | Falls                                           | 307 (240 to 402) | 268 (206 to 352) | -12.7% (-18.5% to -6.1%)  |
| 35 | Romania             | Fire, heat, and hot substances                  | 5 (3 to 9)       | 4 (2 to 6)       | -24.8% (-30.5% to -19.7%) |
| 36 | Romania             | Foreign body in eyes                            | 0 (0 to 0)       | 0 (0 to 0)       | 0.3% (0.1% to 0.6%)       |
| 37 | Romania             | Foreign body in other body part                 | 2 (1 to 5)       | 2 (1 to 5)       | 1.1% (-4% to 7.5%)        |
| 38 | Romania             | Motor vehicle road injuries                     | 95 (74 to 119)   | 79 (61 to 100)   | -16.6% (-25.3% to -6.5%)  |
| 39 | Romania             | Motorcyclist road injuries                      | 15 (11 to 20)    | 12 (9 to 16)     | -21.7% (-33% to -8.2%)    |
| 40 | Romania             | Non-venomous animal contact                     | 7 (4 to 12)      | 6 (3 to 10)      | -13.9% (-18.5% to -9.3%)  |
| 41 | Romania             | Other exposure to mechanical forces             | 160 (102 to 248) | 140 (88 to 219)  | -12.4% (-18.9% to -5%)    |
| 42 | Romania             | Other road injuries                             | 2 (1 to 3)       | 1 (1 to 2)       | -28.6% (-37.3% to -19.6%) |
| 43 | Romania             | Other transport injuries                        | 8 (6 to 10)      | 7 (5 to 9)       | -11.8% (-17.3% to -6.4%)  |
| 44 | Romania             | Other unintentional injuries                    | 35 (22 to 55)    | 29 (18 to 47)    | -16.4% (-23.9% to -8.6%)  |
| 45 |                     |                                                 |                  |                  |                           |
| 46 |                     |                                                 |                  |                  |                           |

|    |                    |                                                 |                  |                  |                           |
|----|--------------------|-------------------------------------------------|------------------|------------------|---------------------------|
| 1  |                    |                                                 |                  |                  |                           |
| 2  | Romania            | Pedestrian road injuries                        | 48 (38 to 60)    | 25 (19 to 32)    | -47.7% (-53.8% to -40.4%) |
| 3  | Romania            | Physical violence by firearm                    | 0 (0 to 0)       | 0 (0 to 1)       | 105.3% (79.4% to 134.1%)  |
| 4  | Romania            | Physical violence by other means                | 36 (25 to 49)    | 24 (17 to 34)    | -32.1% (-40.8% to -21.9%) |
| 5  | Romania            | Physical violence by sharp object               | 3 (2 to 5)       | 2 (1 to 3)       | -33.8% (-46.2% to -22.1%) |
| 6  | Romania            | Poisoning by carbon monoxide                    | 0 (0 to 0)       | 0 (0 to 0)       | -6.4% (-21.7% to 11%)     |
| 7  | Romania            | Poisoning by other means                        | 1 (1 to 1)       | 0 (0 to 1)       | -50.4% (-60% to -41.2%)   |
| 8  | Romania            | Pulmonary aspiration and foreign body in airway | 1 (1 to 2)       | 1 (1 to 2)       | -22.1% (-30.4% to -14.1%) |
| 9  | Romania            | Self-harm by firearm                            | 0 (0 to 0)       | 0 (0 to 1)       | 43.5% (21.7% to 71.2%)    |
| 10 | Romania            | Self-harm by other specified means              | 2 (1 to 3)       | 2 (2 to 4)       | 11.5% (5.3% to 17.9%)     |
| 11 | Romania            | Unintentional firearm injuries                  | 1 (1 to 2)       | 1 (1 to 2)       | 1.9% (-9.7% to 13.5%)     |
| 12 | Romania            | Venomous animal contact                         | 5 (2 to 10)      | 4 (2 to 9)       | -17.2% (-21.8% to -12.7%) |
| 13 | Russian Federation | Adverse effects of medical treatment            | 0 (0 to 0)       | 0 (0 to 0)       | 0% (0% to 0%)             |
| 14 | Russian Federation | Conflict and terrorism                          | 1 (0 to 2)       | 0 (0 to 0)       | NA                        |
| 15 | Russian Federation | Cyclist road injuries                           | 69 (46 to 99)    | 57 (38 to 83)    | -17.6% (-21.5% to -13.7%) |
| 16 | Russian Federation | Drowning                                        | 1 (1 to 1)       | 0 (0 to 1)       | -52.3% (-54.3% to -50.3%) |
| 17 | Russian Federation | Environmental heat and cold exposure            | 21 (15 to 28)    | 11 (8 to 15)     | -46.1% (-49.7% to -41.8%) |
| 18 | Russian Federation | Executions and police conflict                  | 0 (0 to 0)       | 0 (0 to 0)       | NA                        |
| 19 | Russian Federation | Exposure to forces of nature                    | 0 (0 to 0)       | 0 (0 to 0)       | NA                        |
| 20 | Russian Federation | Falls                                           | 243 (184 to 329) | 254 (193 to 343) | 4.1% (1.6% to 6.7%)       |
| 21 | Russian Federation | Fire, heat, and hot substances                  | 4 (3 to 7)       | 3 (2 to 5)       | -27.5% (-31.4% to -24.5%) |
| 22 | Russian Federation | Foreign body in eyes                            | 0 (0 to 0)       | 0 (0 to 0)       | 0.9% (0.4% to 1.7%)       |
| 23 | Russian Federation | Foreign body in other body part                 | 3 (1 to 5)       | 3 (1 to 5)       | -1% (-1.9% to 0.4%)       |
| 24 | Russian Federation | Motor vehicle road injuries                     | 202 (146 to 268) | 180 (132 to 238) | -11% (-14.3% to -7.3%)    |
| 25 | Russian Federation | Motorcyclist road injuries                      | 23 (15 to 32)    | 17 (12 to 25)    | -22.9% (-26.5% to -19.1%) |
| 26 | Russian Federation | Non-venomous animal contact                     | 5 (3 to 8)       | 4 (2 to 7)       | -13.2% (-16.1% to -10.9%) |
| 27 | Russian Federation | Other exposure to mechanical forces             | 124 (77 to 195)  | 80 (50 to 127)   | -35.1% (-38.1% to -31.9%) |
| 28 | Russian Federation | Other road injuries                             | 4 (2 to 6)       | 3 (2 to 6)       | -13.1% (-17.8% to -8.3%)  |
| 29 | Russian Federation | Other transport injuries                        | 8 (6 to 10)      | 7 (5 to 10)      | -6.8% (-8.6% to -5.1%)    |
| 30 | Russian Federation | Other unintentional injuries                    | 34 (22 to 56)    | 26 (16 to 42)    | -25.1% (-28.5% to -21.2%) |
| 31 | Russian Federation | Pedestrian road injuries                        | 124 (91 to 161)  | 54 (39 to 71)    | -56.3% (-58.2% to -54.5%) |
| 32 | Russian Federation | Physical violence by firearm                    | 0 (0 to 1)       | 0 (0 to 0)       | -15.7% (-25.9% to -5.8%)  |
| 33 | Russian Federation | Physical violence by other means                | 59 (41 to 86)    | 38 (27 to 55)    | -35.2% (-37% to -33%)     |
| 34 | Russian Federation | Physical violence by sharp object               | 6 (4 to 10)      | 3 (2 to 5)       | -46.2% (-50.8% to -41%)   |
| 35 | Russian Federation | Poisoning by carbon monoxide                    | 0 (0 to 0)       | 0 (0 to 0)       | -29.3% (-34% to -24.3%)   |
| 36 | Russian Federation | Poisoning by other means                        | 0 (0 to 1)       | 0 (0 to 0)       | -28.6% (-33.9% to -23.9%) |
| 37 | Russian Federation | Pulmonary aspiration and foreign body in airway | 1 (1 to 2)       | 1 (1 to 2)       | -9.8% (-13% to -6.1%)     |
| 38 | Russian Federation | Self-harm by firearm                            | 2 (1 to 3)       | 1 (1 to 2)       | -32.9% (-36.2% to -29.9%) |
| 39 | Russian Federation | Self-harm by other specified means              | 7 (4 to 11)      | 6 (4 to 9)       | -19.1% (-21.3% to -16.7%) |
| 40 | Russian Federation | Unintentional firearm injuries                  | 1 (1 to 2)       | 1 (1 to 2)       | -24.6% (-31.1% to -18.7%) |
| 41 | Russian Federation | Venomous animal contact                         | 4 (2 to 7)       | 3 (1 to 6)       | -8.9% (-11.6% to -6.5%)   |
| 42 | Rwanda             | Adverse effects of medical treatment            | 0 (0 to 0)       | 0 (0 to 0)       | 0% (0% to 0%)             |
| 43 | Rwanda             | Conflict and terrorism                          | 167 (51 to 429)  | 0 (0 to 0)       | NA                        |
| 44 | Rwanda             | Cyclist road injuries                           | 66 (45 to 96)    | 47 (32 to 68)    | -29.6% (-35.1% to -23.6%) |
| 45 |                    |                                                 |                  |                  |                           |
| 46 |                    |                                                 |                  |                  |                           |



|    |                       |                                                 |                |                |                           |
|----|-----------------------|-------------------------------------------------|----------------|----------------|---------------------------|
| 1  |                       |                                                 |                |                |                           |
| 2  | Rwanda                | Drowning                                        | 0 (0 to 0)     | 0 (0 to 0)     | -22.8% (-30.1% to -12.9%) |
| 3  | Rwanda                | Environmental heat and cold exposure            | 0 (0 to 1)     | 0 (0 to 1)     | -9.8% (-17% to -2.8%)     |
| 4  | Rwanda                | Executions and police conflict                  | 0 (0 to 0)     | 0 (0 to 0)     | NA                        |
| 5  | Rwanda                | Exposure to forces of nature                    | 0 (0 to 0)     | 0 (0 to 0)     | NA                        |
| 6  | Rwanda                | Falls                                           | 23 (15 to 36)  | 28 (18 to 44)  | 21.6% (16.3% to 27%)      |
| 7  | Rwanda                | Fire, heat, and hot substances                  | 0 (0 to 1)     | 0 (0 to 1)     | -24.1% (-30.9% to -17.6%) |
| 8  | Rwanda                | Foreign body in eyes                            | 0 (0 to 0)     | 0 (0 to 0)     | -0.4% (-1.2% to 0%)       |
| 9  | Rwanda                | Foreign body in other body part                 | 3 (1 to 7)     | 3 (1 to 7)     | 0% (-5.8% to 7.1%)        |
| 10 | Rwanda                | Motor vehicle road injuries                     | 35 (22 to 52)  | 28 (18 to 41)  | -19.9% (-27.1% to -11%)   |
| 11 | Rwanda                | Motorcyclist road injuries                      | 52 (38 to 71)  | 42 (31 to 57)  | -18.8% (-24.3% to -12.6%) |
| 12 | Rwanda                | Non-venomous animal contact                     | 6 (3 to 12)    | 5 (2 to 9)     | -22.7% (-27.7% to -17.1%) |
| 13 | Rwanda                | Other exposure to mechanical forces             | 26 (13 to 48)  | 24 (12 to 44)  | -8.1% (-15.7% to -0.4%)   |
| 14 | Rwanda                | Other road injuries                             | 2 (1 to 4)     | 2 (1 to 3)     | -7.7% (-15.7% to 1.4%)    |
| 15 | Rwanda                | Other transport injuries                        | 4 (3 to 6)     | 3 (2 to 4)     | -27.5% (-33.3% to -20.3%) |
| 16 | Rwanda                | Other unintentional injuries                    | 3 (2 to 5)     | 2 (1 to 4)     | -20.4% (-27.8% to -13%)   |
| 17 | Rwanda                | Pedestrian road injuries                        | 94 (68 to 126) | 65 (48 to 87)  | -30.3% (-34.9% to -25.3%) |
| 18 | Rwanda                | Physical violence by firearm                    | 0 (0 to 0)     | 0 (0 to 0)     | 13% (-5.5% to 33.6%)      |
| 19 | Rwanda                | Physical violence by other means                | 7 (5 to 11)    | 5 (3 to 8)     | -28.7% (-33.8% to -22.8%) |
| 20 | Rwanda                | Physical violence by sharp object               | 2 (1 to 3)     | 1 (1 to 3)     | -17% (-24.8% to -8.6%)    |
| 21 | Rwanda                | Poisoning by carbon monoxide                    | 0 (0 to 0)     | 0 (0 to 0)     | 13.7% (-0.2% to 30.9%)    |
| 22 | Rwanda                | Poisoning by other means                        | 0 (0 to 0)     | 0 (0 to 0)     | -28.5% (-37.4% to -18.6%) |
| 23 | Rwanda                | Pulmonary aspiration and foreign body in airway | 0 (0 to 0)     | 0 (0 to 0)     | -17.5% (-27% to -7%)      |
| 24 | Rwanda                | Self-harm by firearm                            | 0 (0 to 0)     | 0 (0 to 0)     | -16.3% (-24% to -7.3%)    |
| 25 | Rwanda                | Self-harm by other specified means              | 0 (0 to 0)     | 0 (0 to 0)     | -36.7% (-41.3% to -32.1%) |
| 26 | Rwanda                | Unintentional firearm injuries                  | 1 (0 to 2)     | 1 (0 to 2)     | -24.9% (-33.6% to -15.7%) |
| 27 | Rwanda                | Venomous animal contact                         | 1 (0 to 3)     | 1 (0 to 2)     | -26% (-34.8% to -17.4%)   |
| 28 | Saint Kitts and Nevis | Adverse effects of medical treatment            | 0 (0 to 0)     | 0 (0 to 0)     | 0% (0% to 0%)             |
| 29 | Saint Kitts and Nevis | Conflict and terrorism                          | 0 (0 to 0)     | 0 (0 to 0)     | NA                        |
| 30 | Saint Kitts and Nevis | Cyclist road injuries                           | 22 (14 to 32)  | 19 (12 to 28)  | -13.2% (-24.7% to -1.5%)  |
| 31 | Saint Kitts and Nevis | Drowning                                        | 0 (0 to 0)     | 0 (0 to 0)     | 11.6% (-0.7% to 25.2%)    |
| 32 | Saint Kitts and Nevis | Environmental heat and cold exposure            | 2 (1 to 3)     | 2 (1 to 3)     | 2.3% (-2.1% to 7.4%)      |
| 33 | Saint Kitts and Nevis | Executions and police conflict                  | 0 (0 to 0)     | 0 (0 to 0)     | NA                        |
| 34 | Saint Kitts and Nevis | Exposure to forces of nature                    | 0 (0 to 0)     | 0 (0 to 0)     | NA                        |
| 35 | Saint Kitts and Nevis | Falls                                           | 32 (21 to 47)  | 41 (27 to 62)  | 30.9% (25.7% to 36%)      |
| 36 | Saint Kitts and Nevis | Fire, heat, and hot substances                  | 1 (1 to 2)     | 1 (1 to 1)     | -32.7% (-38.6% to -26.6%) |
| 37 | Saint Kitts and Nevis | Foreign body in eyes                            | 0 (0 to 0)     | 0 (0 to 0)     | 0.8% (0% to 1.8%)         |
| 38 | Saint Kitts and Nevis | Foreign body in other body part                 | 2 (1 to 3)     | 2 (1 to 3)     | -1.6% (-7.7% to 6%)       |
| 39 | Saint Kitts and Nevis | Motor vehicle road injuries                     | 34 (23 to 48)  | 25 (17 to 35)  | -26.5% (-35.7% to -16.7%) |
| 40 | Saint Kitts and Nevis | Motorcyclist road injuries                      | 22 (16 to 30)  | 26 (18 to 36)  | 17.4% (3.3% to 34.1%)     |
| 41 | Saint Kitts and Nevis | Non-venomous animal contact                     | 2 (1 to 4)     | 2 (1 to 4)     | -10% (-14.9% to -4.6%)    |
| 42 | Saint Kitts and Nevis | Other exposure to mechanical forces             | 82 (42 to 147) | 86 (43 to 154) | 5% (-2.9% to 12.7%)       |
| 43 | Saint Kitts and Nevis | Other road injuries                             | 5 (3 to 9)     | 5 (3 to 9)     | 0% (-14% to 14.5%)        |
| 44 | Saint Kitts and Nevis | Other transport injuries                        | 3 (2 to 4)     | 3 (2 to 4)     | -1.6% (-8.3% to 6.2%)     |
| 45 |                       |                                                 |                |                |                           |
| 46 |                       |                                                 |                |                |                           |

|    |                                  |                                                 |               |               |                           |
|----|----------------------------------|-------------------------------------------------|---------------|---------------|---------------------------|
| 1  |                                  |                                                 |               |               |                           |
| 2  | Saint Kitts and Nevis            | Other unintentional injuries                    | 4 (2 to 8)    | 4 (2 to 8)    | -8.8% (-14.7% to -2.7%)   |
| 3  | Saint Kitts and Nevis            | Pedestrian road injuries                        | 22 (16 to 30) | 14 (10 to 20) | -36.5% (-44.8% to -27.9%) |
| 4  | Saint Kitts and Nevis            | Physical violence by firearm                    | 2 (1 to 2)    | 6 (3 to 9)    | 276.5% (204.1% to 366.2%) |
| 5  | Saint Kitts and Nevis            | Physical violence by other means                | 12 (8 to 19)  | 18 (11 to 28) | 42.9% (23.3% to 63%)      |
| 6  | Saint Kitts and Nevis            | Physical violence by sharp object               | 4 (2 to 7)    | 6 (3 to 11)   | 58.4% (32.4% to 86.2%)    |
| 7  | Saint Kitts and Nevis            | Poisoning by carbon monoxide                    | 0 (0 to 0)    | 0 (0 to 0)    | 18.3% (5.1% to 32%)       |
| 8  | Saint Kitts and Nevis            | Poisoning by other means                        | 0 (0 to 0)    | 0 (0 to 0)    | -1.8% (-13.6% to 8.6%)    |
| 9  | Saint Kitts and Nevis            | Pulmonary aspiration and foreign body in airway | 0 (0 to 0)    | 0 (0 to 0)    | -11.3% (-19.8% to -2.9%)  |
| 10 | Saint Kitts and Nevis            | Self-harm by firearm                            | 0 (0 to 0)    | 0 (0 to 0)    | 7.1% (-4.4% to 21.9%)     |
| 11 | Saint Kitts and Nevis            | Self-harm by other specified means              | 0 (0 to 0)    | 0 (0 to 0)    | -9.4% (-22.4% to 4.1%)    |
| 12 | Saint Kitts and Nevis            | Unintentional firearm injuries                  | 7 (3 to 14)   | 6 (2 to 12)   | -18.4% (-28.8% to -6.9%)  |
| 13 | Saint Kitts and Nevis            | Venomous animal contact                         | 2 (1 to 3)    | 1 (0 to 3)    | -10.2% (-15.7% to -4.3%)  |
| 14 | Saint Lucia                      | Adverse effects of medical treatment            | 0 (0 to 0)    | 0 (0 to 0)    | 0% (0% to 0%)             |
| 15 | Saint Lucia                      | Conflict and terrorism                          | 4 (2 to 9)    | 0 (0 to 0)    | NA                        |
| 16 | Saint Lucia                      | Cyclist road injuries                           | 35 (25 to 47) | 28 (20 to 38) | -20.9% (-29.5% to -11.1%) |
| 17 | Saint Lucia                      | Drowning                                        | 0 (0 to 1)    | 0 (0 to 1)    | 24.8% (11.3% to 40.6%)    |
| 18 | Saint Lucia                      | Environmental heat and cold exposure            | 10 (7 to 14)  | 11 (8 to 15)  | 5.5% (1.6% to 9.7%)       |
| 19 | Saint Lucia                      | Executions and police conflict                  | 0 (0 to 0)    | 0 (0 to 0)    | NA                        |
| 20 | Saint Lucia                      | Exposure to forces of nature                    | 0 (0 to 0)    | 0 (0 to 0)    | NA                        |
| 21 | Saint Lucia                      | Falls                                           | 43 (34 to 56) | 64 (49 to 83) | 47.2% (41.4% to 52.7%)    |
| 22 | Saint Lucia                      | Fire, heat, and hot substances                  | 4 (3 to 7)    | 4 (2 to 6)    | -11.7% (-18.3% to -5.1%)  |
| 23 | Saint Lucia                      | Foreign body in eyes                            | 0 (0 to 0)    | 0 (0 to 0)    | 1.4% (0.7% to 2.5%)       |
| 24 | Saint Lucia                      | Foreign body in other body part                 | 1 (1 to 2)    | 1 (1 to 2)    | 1% (-4.6% to 6.4%)        |
| 25 | Saint Lucia                      | Motor vehicle road injuries                     | 42 (32 to 54) | 32 (24 to 42) | -23.2% (-32% to -15.1%)   |
| 26 | Saint Lucia                      | Motorcyclist road injuries                      | 14 (11 to 19) | 19 (15 to 25) | 35.1% (18.2% to 56.1%)    |
| 27 | Saint Lucia                      | Non-venomous animal contact                     | 3 (2 to 5)    | 3 (2 to 5)    | -5.2% (-11% to 0.7%)      |
| 28 | Saint Lucia                      | Other exposure to mechanical forces             | 37 (22 to 61) | 46 (27 to 75) | 22.4% (16.1% to 29.7%)    |
| 29 | Saint Lucia                      | Other road injuries                             | 4 (2 to 7)    | 4 (2 to 6)    | -3.5% (-13.9% to 8.6%)    |
| 30 | Saint Lucia                      | Other transport injuries                        | 5 (4 to 7)    | 6 (4 to 8)    | 15.5% (7.8% to 23.6%)     |
| 31 | Saint Lucia                      | Other unintentional injuries                    | 15 (9 to 24)  | 14 (9 to 23)  | -5.3% (-10.7% to 0.2%)    |
| 32 | Saint Lucia                      | Pedestrian road injuries                        | 19 (15 to 24) | 13 (9 to 17)  | -33.8% (-41% to -25.7%)   |
| 33 | Saint Lucia                      | Physical violence by firearm                    | 1 (1 to 1)    | 3 (2 to 4)    | 235.6% (181.4% to 294.7%) |
| 34 | Saint Lucia                      | Physical violence by other means                | 12 (8 to 17)  | 15 (10 to 23) | 26.9% (15.3% to 38.6%)    |
| 35 | Saint Lucia                      | Physical violence by sharp object               | 6 (4 to 8)    | 8 (5 to 12)   | 39.1% (21.6% to 59.2%)    |
| 36 | Saint Lucia                      | Poisoning by carbon monoxide                    | 0 (0 to 0)    | 0 (0 to 0)    | 14.1% (1.2% to 28.2%)     |
| 37 | Saint Lucia                      | Poisoning by other means                        | 0 (0 to 0)    | 0 (0 to 0)    | -6.3% (-16.5% to 4.2%)    |
| 38 | Saint Lucia                      | Pulmonary aspiration and foreign body in airway | 1 (0 to 1)    | 0 (0 to 1)    | -19.7% (-26.8% to -12.4%) |
| 39 | Saint Lucia                      | Self-harm by firearm                            | 0 (0 to 0)    | 0 (0 to 0)    | 12.4% (-0.3% to 27.5%)    |
| 40 | Saint Lucia                      | Self-harm by other specified means              | 1 (0 to 1)    | 1 (0 to 1)    | -2.8% (-11.2% to 5.1%)    |
| 41 | Saint Lucia                      | Unintentional firearm injuries                  | 5 (3 to 7)    | 5 (3 to 8)    | 14.4% (4.2% to 25.2%)     |
| 42 | Saint Lucia                      | Venomous animal contact                         | 5 (2 to 9)    | 5 (2 to 9)    | -4% (-8.7% to 1.5%)       |
| 43 | Saint Vincent and the Grenadines | Adverse effects of medical treatment            | 0 (0 to 0)    | 0 (0 to 0)    | 0% (0% to 0%)             |
| 44 | Saint Vincent and the Grenadines | Conflict and terrorism                          | 0 (0 to 0)    | 0 (0 to 0)    | NA                        |

|    |                                  |                                                 |               |                |                           |
|----|----------------------------------|-------------------------------------------------|---------------|----------------|---------------------------|
| 1  |                                  |                                                 |               |                |                           |
| 2  | Saint Vincent and the Grenadines | Cyclist road injuries                           | 27 (19 to 36) | 23 (16 to 30)  | -15.1% (-22.6% to -6.7%)  |
| 3  | Saint Vincent and the Grenadines | Drowning                                        | 0 (0 to 1)    | 0 (0 to 1)     | 6% (-3.4% to 15.2%)       |
| 4  | Saint Vincent and the Grenadines | Environmental heat and cold exposure            | 11 (8 to 16)  | 12 (9 to 17)   | 5.2% (1.2% to 9.9%)       |
| 5  | Saint Vincent and the Grenadines | Executions and police conflict                  | 0 (0 to 0)    | 0 (0 to 0)     | NA                        |
| 6  | Saint Vincent and the Grenadines | Exposure to forces of nature                    | 0 (0 to 0)    | 0 (0 to 0)     | NA                        |
| 7  | Saint Vincent and the Grenadines | Falls                                           | 55 (43 to 71) | 80 (63 to 104) | 45.7% (40.1% to 50.9%)    |
| 8  | Saint Vincent and the Grenadines | Fire, heat, and hot substances                  | 5 (3 to 8)    | 4 (3 to 7)     | -17.9% (-24% to -11.3%)   |
| 9  | Saint Vincent and the Grenadines | Foreign body in eyes                            | 0 (0 to 0)    | 0 (0 to 0)     | 1.7% (0.7% to 3.3%)       |
| 10 | Saint Vincent and the Grenadines | Foreign body in other body part                 | 2 (1 to 4)    | 1 (1 to 3)     | -28.2% (-35% to -21.7%)   |
| 11 | Saint Vincent and the Grenadines | Motor vehicle road injuries                     | 19 (14 to 25) | 19 (14 to 24)  | -1.8% (-11.4% to 8.9%)    |
| 12 | Saint Vincent and the Grenadines | Motorcyclist road injuries                      | 10 (7 to 14)  | 12 (9 to 16)   | 21% (9.1% to 36.3%)       |
| 13 | Saint Vincent and the Grenadines | Non-venomous animal contact                     | 3 (2 to 6)    | 3 (2 to 6)     | -5.3% (-10.9% to 1%)      |
| 14 | Saint Vincent and the Grenadines | Other exposure to mechanical forces             | 39 (23 to 64) | 46 (28 to 76)  | 19.2% (11.3% to 28.1%)    |
| 15 | Saint Vincent and the Grenadines | Other road injuries                             | 3 (2 to 5)    | 3 (2 to 5)     | -4% (-13.8% to 6.5%)      |
| 16 | Saint Vincent and the Grenadines | Other transport injuries                        | 4 (3 to 6)    | 4 (3 to 6)     | 1.4% (-4.2% to 7.9%)      |
| 17 | Saint Vincent and the Grenadines | Other unintentional injuries                    | 13 (8 to 21)  | 13 (8 to 21)   | -3.2% (-8.2% to 2.1%)     |
| 18 | Saint Vincent and the Grenadines | Pedestrian road injuries                        | 19 (15 to 25) | 10 (8 to 13)   | -47.3% (-53.6% to -40.4%) |
| 19 | Saint Vincent and the Grenadines | Physical violence by firearm                    | 1 (1 to 1)    | 2 (1 to 3)     | 138.4% (101.8% to 185.5%) |
| 20 | Saint Vincent and the Grenadines | Physical violence by other means                | 15 (10 to 21) | 18 (12 to 26)  | 18.5% (4.5% to 32.2%)     |
| 21 | Saint Vincent and the Grenadines | Physical violence by sharp object               | 4 (2 to 6)    | 8 (5 to 12)    | 97.3% (69.8% to 132.5%)   |
| 22 | Saint Vincent and the Grenadines | Poisoning by carbon monoxide                    | 0 (0 to 0)    | 0 (0 to 0)     | 16.6% (2% to 30.7%)       |
| 23 | Saint Vincent and the Grenadines | Poisoning by other means                        | 0 (0 to 0)    | 0 (0 to 0)     | 3.9% (-6.9% to 13.6%)     |
| 24 | Saint Vincent and the Grenadines | Pulmonary aspiration and foreign body in airway | 1 (0 to 1)    | 0 (0 to 1)     | -16% (-23.4% to -8%)      |
| 25 | Saint Vincent and the Grenadines | Self-harm by firearm                            | 0 (0 to 0)    | 0 (0 to 0)     | 11.6% (-0.7% to 26.5%)    |
| 26 | Saint Vincent and the Grenadines | Self-harm by other specified means              | 0 (0 to 1)    | 0 (0 to 1)     | -12.4% (-19.7% to -5.3%)  |
| 27 | Saint Vincent and the Grenadines | Unintentional firearm injuries                  | 5 (3 to 8)    | 5 (3 to 8)     | -1.2% (-11.3% to 9.2%)    |
| 28 | Saint Vincent and the Grenadines | Venomous animal contact                         | 5 (3 to 10)   | 5 (2 to 9)     | -8.5% (-13.7% to -2.5%)   |
| 29 | Samoa                            | Adverse effects of medical treatment            | 0 (0 to 0)    | 0 (0 to 0)     | 0% (0% to 0%)             |
| 30 | Samoa                            | Conflict and terrorism                          | 0 (0 to 0)    | 0 (0 to 0)     | NA                        |
| 31 | Samoa                            | Cyclist road injuries                           | 14 (9 to 20)  | 14 (10 to 20)  | 2.2% (-4.8% to 10%)       |
| 32 | Samoa                            | Drowning                                        | 0 (0 to 1)    | 0 (0 to 1)     | 9.8% (1.7% to 19.7%)      |
| 33 | Samoa                            | Environmental heat and cold exposure            | 2 (2 to 3)    | 2 (2 to 3)     | 0% (-5.4% to 5%)          |
| 34 | Samoa                            | Executions and police conflict                  | 0 (0 to 0)    | 0 (0 to 0)     | NA                        |
| 35 | Samoa                            | Exposure to forces of nature                    | 28 (17 to 46) | 0 (0 to 0)     | NA                        |
| 36 | Samoa                            | Falls                                           | 52 (41 to 68) | 74 (58 to 97)  | 43.4% (38.2% to 48.8%)    |
| 37 | Samoa                            | Fire, heat, and hot substances                  | 1 (1 to 2)    | 1 (1 to 2)     | 6.8% (-0.5% to 14.5%)     |
| 38 | Samoa                            | Foreign body in eyes                            | 0 (0 to 0)    | 0 (0 to 0)     | -0.1% (-0.7% to 0.5%)     |
| 39 | Samoa                            | Foreign body in other body part                 | 1 (0 to 1)    | 1 (0 to 1)     | -2.3% (-8.4% to 3%)       |
| 40 | Samoa                            | Motor vehicle road injuries                     | 34 (26 to 43) | 33 (25 to 42)  | -4.1% (-10.7% to 3.3%)    |
| 41 | Samoa                            | Motorcyclist road injuries                      | 11 (8 to 14)  | 13 (9 to 17)   | 17.3% (7.7% to 28.4%)     |
| 42 | Samoa                            | Non-venomous animal contact                     | 5 (3 to 8)    | 4 (2 to 7)     | -14.9% (-19.5% to -10.6%) |
| 43 | Samoa                            | Other exposure to mechanical forces             | 13 (8 to 22)  | 12 (7 to 19)   | -11.7% (-17.6% to -6.4%)  |
| 44 | Samoa                            | Other road injuries                             | 2 (1 to 3)    | 2 (1 to 3)     | 1.6% (-7.6% to 12.9%)     |
| 45 |                                  |                                                 |               |                |                           |
| 46 |                                  |                                                 |               |                |                           |

|    |                       |                                                 |                |                 |                           |
|----|-----------------------|-------------------------------------------------|----------------|-----------------|---------------------------|
| 1  |                       |                                                 |                |                 |                           |
| 2  | Samoa                 | Other transport injuries                        | 6 (5 to 8)     | 6 (4 to 8)      | -5.7% (-10.5% to -0.8%)   |
| 3  | Samoa                 | Other unintentional injuries                    | 7 (4 to 10)    | 6 (4 to 10)     | -2.6% (-7.5% to 2.6%)     |
| 4  | Samoa                 | Pedestrian road injuries                        | 16 (12 to 20)  | 17 (13 to 22)   | 11.8% (3.1% to 20.8%)     |
| 5  | Samoa                 | Physical violence by firearm                    | 0 (0 to 0)     | 0 (0 to 0)      | 2.7% (-8.9% to 16.1%)     |
| 6  | Samoa                 | Physical violence by other means                | 35 (25 to 50)  | 35 (25 to 49)   | 0.2% (-5.9% to 6.8%)      |
| 7  | Samoa                 | Physical violence by sharp object               | 3 (2 to 5)     | 2 (2 to 4)      | -22.6% (-30.5% to -14.7%) |
| 8  | Samoa                 | Poisoning by carbon monoxide                    | 0 (0 to 0)     | 0 (0 to 0)      | 12.3% (1.8% to 24.1%)     |
| 9  | Samoa                 | Poisoning by other means                        | 0 (0 to 0)     | 0 (0 to 0)      | -12.4% (-18.8% to -5.9%)  |
| 10 | Samoa                 | Pulmonary aspiration and foreign body in airway | 0 (0 to 0)     | 0 (0 to 0)      | -7.3% (-16.7% to 3.4%)    |
| 11 | Samoa                 | Self-harm by firearm                            | 1 (0 to 1)     | 1 (0 to 1)      | -11.2% (-26% to 4.2%)     |
| 12 | Samoa                 | Self-harm by other specified means              | 3 (2 to 4)     | 3 (2 to 4)      | -5% (-11.2% to 1.6%)      |
| 13 | Samoa                 | Unintentional firearm injuries                  | 2 (1 to 3)     | 2 (1 to 3)      | -18% (-25.4% to -10.5%)   |
| 14 | Samoa                 | Venomous animal contact                         | 3 (1 to 6)     | 3 (1 to 5)      | -11% (-16.3% to -5.1%)    |
| 15 | San Marino            | Adverse effects of medical treatment            | 0 (0 to 0)     | 0 (0 to 0)      | 0% (0% to 0%)             |
| 16 | San Marino            | Conflict and terrorism                          | 0 (0 to 0)     | 0 (0 to 0)      | NA                        |
| 17 | San Marino            | Cyclist road injuries                           | 21 (14 to 31)  | 15 (10 to 22)   | -29.2% (-35.8% to -21.7%) |
| 18 | San Marino            | Drowning                                        | 0 (0 to 0)     | 0 (0 to 0)      | 70.4% (57.6% to 85.2%)    |
| 19 | San Marino            | Environmental heat and cold exposure            | 0 (0 to 1)     | 0 (0 to 1)      | -1.2% (-6% to 4.8%)       |
| 20 | San Marino            | Executions and police conflict                  | 0 (0 to 0)     | 0 (0 to 0)      | NA                        |
| 21 | San Marino            | Exposure to forces of nature                    | 0 (0 to 0)     | 0 (0 to 0)      | NA                        |
| 22 | San Marino            | Falls                                           | 95 (59 to 147) | 116 (71 to 181) | 22.5% (18.2% to 26.9%)    |
| 23 | San Marino            | Fire, heat, and hot substances                  | 0 (0 to 1)     | 0 (0 to 1)      | 3.5% (-0.1% to 7.9%)      |
| 24 | San Marino            | Foreign body in eyes                            | 0 (0 to 0)     | 0 (0 to 0)      | -0.6% (-1.6% to -0.1%)    |
| 25 | San Marino            | Foreign body in other body part                 | 2 (1 to 4)     | 2 (1 to 4)      | 0.4% (-4.5% to 6.4%)      |
| 26 | San Marino            | Motor vehicle road injuries                     | 33 (23 to 47)  | 24 (17 to 35)   | -25.9% (-32.6% to -18.8%) |
| 27 | San Marino            | Motorcyclist road injuries                      | 29 (21 to 38)  | 23 (17 to 31)   | -20.8% (-28.3% to -12.7%) |
| 28 | San Marino            | Non-venomous animal contact                     | 1 (1 to 2)     | 1 (0 to 2)      | -4% (-8.2% to 0.2%)       |
| 29 | San Marino            | Other exposure to mechanical forces             | 85 (44 to 157) | 78 (39 to 143)  | -8% (-12.7% to -2.9%)     |
| 30 | San Marino            | Other road injuries                             | 5 (2 to 8)     | 4 (2 to 8)      | -5.2% (-14.9% to 7%)      |
| 31 | San Marino            | Other transport injuries                        | 2 (1 to 3)     | 2 (2 to 3)      | 7.2% (2.1% to 12.5%)      |
| 32 | San Marino            | Other unintentional injuries                    | 8 (4 to 14)    | 7 (4 to 13)     | -8.2% (-12.8% to -4.5%)   |
| 33 | San Marino            | Pedestrian road injuries                        | 9 (6 to 12)    | 6 (4 to 9)      | -26.2% (-32.5% to -19%)   |
| 34 | San Marino            | Physical violence by firearm                    | 0 (0 to 1)     | 1 (0 to 1)      | 25.4% (15.5% to 36.5%)    |
| 35 | San Marino            | Physical violence by other means                | 12 (8 to 19)   | 12 (8 to 19)    | 1.7% (-3.1% to 7.1%)      |
| 36 | San Marino            | Physical violence by sharp object               | 1 (0 to 2)     | 1 (0 to 2)      | -0.4% (-9.1% to 8.1%)     |
| 37 | San Marino            | Poisoning by carbon monoxide                    | 0 (0 to 0)     | 0 (0 to 0)      | 25% (16.3% to 35.3%)      |
| 38 | San Marino            | Poisoning by other means                        | 0 (0 to 0)     | 0 (0 to 0)      | -14.1% (-18.2% to -8.9%)  |
| 39 | San Marino            | Pulmonary aspiration and foreign body in airway | 0 (0 to 0)     | 0 (0 to 0)      | -3.7% (-10.8% to 4.3%)    |
| 40 | San Marino            | Self-harm by firearm                            | 0 (0 to 0)     | 0 (0 to 0)      | -9.2% (-15.8% to -2.8%)   |
| 41 | San Marino            | Self-harm by other specified means              | 0 (0 to 0)     | 0 (0 to 0)      | 0.5% (-5.4% to 5.8%)      |
| 42 | San Marino            | Unintentional firearm injuries                  | 0 (0 to 1)     | 0 (0 to 1)      | 6.5% (-2% to 14.7%)       |
| 43 | San Marino            | Venomous animal contact                         | 0 (0 to 1)     | 0 (0 to 1)      | -5.4% (-12.5% to 2%)      |
| 44 | Sao Tome and Principe | Adverse effects of medical treatment            | 0 (0 to 0)     | 0 (0 to 0)      | 0% (0% to 0%)             |
| 45 |                       |                                                 |                |                 |                           |
| 46 |                       |                                                 |                |                 |                           |

|    |                       |                                                 |                  |                  |                          |
|----|-----------------------|-------------------------------------------------|------------------|------------------|--------------------------|
| 1  |                       |                                                 |                  |                  |                          |
| 2  | Sao Tome and Principe | Conflict and terrorism                          | 0 (0 to 0)       | 0 (0 to 0)       | NA                       |
| 3  | Sao Tome and Principe | Cyclist road injuries                           | 22 (13 to 32)    | 27 (17 to 39)    | 22% (12.6% to 32.7%)     |
| 4  | Sao Tome and Principe | Drowning                                        | 0 (0 to 0)       | 0 (0 to 0)       | 14% (5.5% to 25.2%)      |
| 5  | Sao Tome and Principe | Environmental heat and cold exposure            | 0 (0 to 1)       | 0 (0 to 1)       | 3.6% (-2% to 9.6%)       |
| 6  | Sao Tome and Principe | Executions and police conflict                  | 0 (0 to 0)       | 0 (0 to 0)       | NA                       |
| 7  | Sao Tome and Principe | Exposure to forces of nature                    | 0 (0 to 0)       | 0 (0 to 0)       | NA                       |
| 8  | Sao Tome and Principe | Falls                                           | 31 (21 to 47)    | 41 (27 to 61)    | 30.7% (25.2% to 36.6%)   |
| 9  | Sao Tome and Principe | Fire, heat, and hot substances                  | 0 (0 to 0)       | 0 (0 to 0)       | 6.3% (0.7% to 12.2%)     |
| 10 | Sao Tome and Principe | Foreign body in eyes                            | 0 (0 to 0)       | 0 (0 to 0)       | 0.7% (0% to 1.8%)        |
| 11 | Sao Tome and Principe | Foreign body in other body part                 | 3 (1 to 8)       | 3 (1 to 7)       | -1.8% (-6.9% to 3.7%)    |
| 12 | Sao Tome and Principe | Motor vehicle road injuries                     | 42 (29 to 58)    | 54 (38 to 74)    | 28.9% (20% to 38.6%)     |
| 13 | Sao Tome and Principe | Motorcyclist road injuries                      | 18 (12 to 25)    | 22 (15 to 31)    | 23.7% (14.3% to 33.9%)   |
| 14 | Sao Tome and Principe | Non-venomous animal contact                     | 3 (1 to 6)       | 3 (1 to 6)       | 2.1% (-2.1% to 6.9%)     |
| 15 | Sao Tome and Principe | Other exposure to mechanical forces             | 28 (14 to 50)    | 26 (13 to 46)    | -8.2% (-15.1% to -1.5%)  |
| 16 | Sao Tome and Principe | Other road injuries                             | 2 (1 to 4)       | 2 (1 to 4)       | 12.7% (4% to 22.9%)      |
| 17 | Sao Tome and Principe | Other transport injuries                        | 3 (2 to 4)       | 3 (2 to 4)       | 1.8% (-5.1% to 8.5%)     |
| 18 | Sao Tome and Principe | Other unintentional injuries                    | 3 (2 to 5)       | 3 (1 to 5)       | -7.9% (-14.9% to -1.1%)  |
| 19 | Sao Tome and Principe | Pedestrian road injuries                        | 44 (32 to 58)    | 51 (37 to 67)    | 17.1% (9.6% to 25.2%)    |
| 20 | Sao Tome and Principe | Physical violence by firearm                    | 0 (0 to 0)       | 0 (0 to 0)       | 67.3% (47.7% to 92.3%)   |
| 21 | Sao Tome and Principe | Physical violence by other means                | 8 (5 to 12)      | 9 (6 to 13)      | 11.5% (5.3% to 18.8%)    |
| 22 | Sao Tome and Principe | Physical violence by sharp object               | 2 (1 to 4)       | 2 (1 to 4)       | 9% (0.5% to 18.4%)       |
| 23 | Sao Tome and Principe | Poisoning by carbon monoxide                    | 0 (0 to 0)       | 0 (0 to 0)       | 20.6% (8.6% to 34%)      |
| 24 | Sao Tome and Principe | Poisoning by other means                        | 0 (0 to 0)       | 0 (0 to 0)       | -8% (-15.3% to -0.8%)    |
| 25 | Sao Tome and Principe | Pulmonary aspiration and foreign body in airway | 0 (0 to 0)       | 0 (0 to 0)       | -5.5% (-16% to 6.4%)     |
| 26 | Sao Tome and Principe | Self-harm by firearm                            | 0 (0 to 0)       | 0 (0 to 0)       | 44.8% (35.7% to 55.9%)   |
| 27 | Sao Tome and Principe | Self-harm by other specified means              | 0 (0 to 0)       | 0 (0 to 0)       | 38.3% (29.5% to 48.5%)   |
| 28 | Sao Tome and Principe | Unintentional firearm injuries                  | 1 (0 to 2)       | 1 (0 to 2)       | -9.9% (-18.3% to -1.1%)  |
| 29 | Sao Tome and Principe | Venomous animal contact                         | 0 (0 to 1)       | 0 (0 to 1)       | 2.5% (-4.1% to 9.7%)     |
| 30 | Saudi Arabia          | Adverse effects of medical treatment            | 0 (0 to 0)       | 0 (0 to 0)       | 0% (0% to 0%)            |
| 31 | Saudi Arabia          | Conflict and terrorism                          | 0 (0 to 0)       | 0 (0 to 0)       | NA                       |
| 32 | Saudi Arabia          | Cyclist road injuries                           | 17 (11 to 25)    | 15 (10 to 22)    | -11% (-20% to -1.6%)     |
| 33 | Saudi Arabia          | Drowning                                        | 0 (0 to 0)       | 0 (0 to 1)       | 105.2% (82.2% to 130.2%) |
| 34 | Saudi Arabia          | Environmental heat and cold exposure            | 3 (2 to 5)       | 3 (2 to 5)       | 2.9% (-1.6% to 7.3%)     |
| 35 | Saudi Arabia          | Executions and police conflict                  | 0 (0 to 0)       | 0 (0 to 0)       | NA                       |
| 36 | Saudi Arabia          | Exposure to forces of nature                    | 0 (0 to 0)       | 0 (0 to 0)       | NA                       |
| 37 | Saudi Arabia          | Falls                                           | 235 (184 to 303) | 373 (292 to 477) | 58.7% (52.2% to 65.8%)   |
| 38 | Saudi Arabia          | Fire, heat, and hot substances                  | 1 (0 to 1)       | 1 (0 to 1)       | 0.6% (-5.9% to 7.5%)     |
| 39 | Saudi Arabia          | Foreign body in eyes                            | 0 (0 to 0)       | 0 (0 to 0)       | 0.4% (0% to 1%)          |
| 40 | Saudi Arabia          | Foreign body in other body part                 | 1 (1 to 3)       | 1 (1 to 3)       | -1.1% (-5.5% to 3%)      |
| 41 | Saudi Arabia          | Motor vehicle road injuries                     | 80 (64 to 101)   | 93 (74 to 117)   | 15.9% (6.1% to 25.5%)    |
| 42 | Saudi Arabia          | Motorcyclist road injuries                      | 12 (9 to 16)     | 15 (11 to 19)    | 21.4% (7% to 38%)        |
| 43 | Saudi Arabia          | Non-venomous animal contact                     | 2 (1 to 4)       | 2 (1 to 4)       | 0.1% (-5.2% to 6%)       |
| 44 | Saudi Arabia          | Other exposure to mechanical forces             | 40 (25 to 63)    | 35 (21 to 54)    | -12.8% (-18.2% to -6.6%) |
| 45 |                       |                                                 |                  |                  |                          |
| 46 |                       |                                                 |                  |                  |                          |

|    |              |                                                 |               |               |                           |
|----|--------------|-------------------------------------------------|---------------|---------------|---------------------------|
| 1  |              |                                                 |               |               |                           |
| 2  | Saudi Arabia | Other road injuries                             | 2 (1 to 4)    | 2 (1 to 4)    | -0.1% (-11.3% to 12.1%)   |
| 3  | Saudi Arabia | Other transport injuries                        | 5 (4 to 7)    | 6 (4 to 8)    | 9.6% (3.1% to 17.7%)      |
| 4  | Saudi Arabia | Other unintentional injuries                    | 48 (31 to 75) | 31 (21 to 50) | -33.9% (-38% to -29.4%)   |
| 5  | Saudi Arabia | Pedestrian road injuries                        | 35 (26 to 44) | 31 (24 to 40) | -10.6% (-19% to -1.1%)    |
| 6  | Saudi Arabia | Physical violence by firearm                    | 0 (0 to 0)    | 1 (0 to 1)    | 112.5% (79.9% to 150.3%)  |
| 7  | Saudi Arabia | Physical violence by other means                | 10 (7 to 14)  | 11 (8 to 16)  | 8.6% (2.7% to 15.4%)      |
| 8  | Saudi Arabia | Physical violence by sharp object               | 1 (1 to 2)    | 1 (1 to 2)    | -22.5% (-31.8% to -13%)   |
| 9  | Saudi Arabia | Poisoning by carbon monoxide                    | 0 (0 to 0)    | 0 (0 to 0)    | 45.1% (29% to 64.4%)      |
| 10 | Saudi Arabia | Poisoning by other means                        | 0 (0 to 0)    | 0 (0 to 0)    | -18.5% (-26.2% to -10.9%) |
| 11 | Saudi Arabia | Pulmonary aspiration and foreign body in airway | 0 (0 to 1)    | 0 (0 to 1)    | 3.5% (-5% to 13.7%)       |
| 12 | Saudi Arabia | Self-harm by firearm                            | 0 (0 to 0)    | 0 (0 to 0)    | 85.5% (62.7% to 111.5%)   |
| 13 | Saudi Arabia | Self-harm by other specified means              | 1 (0 to 1)    | 1 (1 to 2)    | 94% (80% to 108.9%)       |
| 14 | Saudi Arabia | Unintentional firearm injuries                  | 3 (2 to 5)    | 2 (1 to 3)    | -31.6% (-39.4% to -23.3%) |
| 15 | Senegal      | Venomous animal contact                         | 1 (0 to 3)    | 1 (1 to 3)    | 3.1% (-3.8% to 11.2%)     |
| 16 | Senegal      | Adverse effects of medical treatment            | 0 (0 to 0)    | 0 (0 to 0)    | 0% (0% to 0%)             |
| 17 | Senegal      | Conflict and terrorism                          | 6 (2 to 16)   | 0 (0 to 0)    | NA                        |
| 18 | Senegal      | Cyclist road injuries                           | 23 (14 to 34) | 26 (17 to 39) | 14% (6.4% to 22.9%)       |
| 19 | Senegal      | Drowning                                        | 0 (0 to 0)    | 0 (0 to 0)    | -8.2% (-15.3% to 0.1%)    |
| 20 | Senegal      | Environmental heat and cold exposure            | 0 (0 to 1)    | 0 (0 to 1)    | 0.3% (-5.8% to 6.1%)      |
| 21 | Senegal      | Executions and police conflict                  | 0 (0 to 0)    | 0 (0 to 0)    | NA                        |
| 22 | Senegal      | Exposure to forces of nature                    | 0 (0 to 0)    | 0 (0 to 0)    | NA                        |
| 23 | Senegal      | Falls                                           | 17 (11 to 26) | 20 (13 to 30) | 17% (12.5% to 21.3%)      |
| 24 | Senegal      | Fire, heat, and hot substances                  | 0 (0 to 0)    | 0 (0 to 0)    | -8.4% (-14.8% to -2.9%)   |
| 25 | Senegal      | Foreign body in eyes                            | 0 (0 to 0)    | 0 (0 to 0)    | -0.1% (-0.5% to 0.4%)     |
| 26 | Senegal      | Foreign body in other body part                 | 3 (1 to 7)    | 3 (1 to 7)    | -0.6% (-5.2% to 4.2%)     |
| 27 | Senegal      | Motor vehicle road injuries                     | 50 (35 to 69) | 59 (41 to 80) | 17.2% (9.2% to 26.5%)     |
| 28 | Senegal      | Motorcyclist road injuries                      | 15 (11 to 22) | 17 (12 to 24) | 9.7% (1.9% to 18.3%)      |
| 29 | Senegal      | Non-venomous animal contact                     | 3 (1 to 6)    | 3 (1 to 5)    | -9.3% (-13.8% to -4.2%)   |
| 30 | Senegal      | Other exposure to mechanical forces             | 25 (12 to 45) | 24 (12 to 43) | -5% (-11.1% to 1.3%)      |
| 31 | Senegal      | Other road injuries                             | 2 (1 to 4)    | 2 (1 to 4)    | 11.4% (2.9% to 20.9%)     |
| 32 | Senegal      | Other transport injuries                        | 3 (2 to 4)    | 3 (2 to 4)    | -5.8% (-13.3% to 1.9%)    |
| 33 | Senegal      | Other unintentional injuries                    | 3 (2 to 5)    | 2 (1 to 4)    | -10.7% (-16.5% to -4.9%)  |
| 34 | Senegal      | Pedestrian road injuries                        | 57 (42 to 74) | 52 (38 to 69) | -9.3% (-14.9% to -3.6%)   |
| 35 | Senegal      | Physical violence by firearm                    | 0 (0 to 0)    | 0 (0 to 0)    | 53.7% (30.8% to 81.1%)    |
| 36 | Senegal      | Physical violence by other means                | 4 (2 to 6)    | 4 (3 to 6)    | 4.7% (-0.5% to 10.5%)     |
| 37 | Senegal      | Physical violence by sharp object               | 1 (1 to 2)    | 1 (1 to 2)    | 4.6% (-2.7% to 12.2%)     |
| 38 | Senegal      | Poisoning by carbon monoxide                    | 0 (0 to 0)    | 0 (0 to 0)    | 10.1% (-1.1% to 23.3%)    |
| 39 | Senegal      | Poisoning by other means                        | 0 (0 to 0)    | 0 (0 to 0)    | -14.9% (-21.5% to -8.1%)  |
| 40 | Senegal      | Pulmonary aspiration and foreign body in airway | 0 (0 to 0)    | 0 (0 to 0)    | -7.6% (-15.8% to 1.5%)    |
| 41 | Senegal      | Self-harm by firearm                            | 0 (0 to 0)    | 0 (0 to 0)    | 16% (8.1% to 25%)         |
| 42 | Senegal      | Self-harm by other specified means              | 0 (0 to 0)    | 0 (0 to 0)    | 8% (2.4% to 13.9%)        |
| 43 | Senegal      | Unintentional firearm injuries                  | 1 (0 to 2)    | 1 (0 to 2)    | -12.1% (-19.8% to -4%)    |
| 44 | Senegal      | Venomous animal contact                         | 0 (0 to 1)    | 0 (0 to 1)    | -6.9% (-13.1% to 0.7%)    |
| 45 |              |                                                 |               |               |                           |
| 46 |              |                                                 |               |               |                           |

|    |            |                                                 |                  |                  |                           |
|----|------------|-------------------------------------------------|------------------|------------------|---------------------------|
| 1  |            |                                                 |                  |                  |                           |
| 2  | Serbia     | Adverse effects of medical treatment            | 0 (0 to 0)       | 0 (0 to 0)       | 0% (0% to 0%)             |
| 3  | Serbia     | Conflict and terrorism                          | 0 (0 to 0)       | 0 (0 to 0)       | NA                        |
| 4  | Serbia     | Cyclist road injuries                           | 82 (60 to 109)   | 62 (46 to 83)    | -23.9% (-32% to -15%)     |
| 5  | Serbia     | Drowning                                        | 0 (0 to 0)       | 0 (0 to 1)       | 92.1% (63.2% to 130.3%)   |
| 6  | Serbia     | Environmental heat and cold exposure            | 2 (1 to 2)       | 2 (1 to 2)       | -8% (-12.8% to -4%)       |
| 7  | Serbia     | Executions and police conflict                  | 0 (0 to 0)       | 0 (0 to 0)       | NA                        |
| 8  | Serbia     | Exposure to forces of nature                    | 0 (0 to 0)       | 0 (0 to 0)       | NA                        |
| 9  | Serbia     | Falls                                           | 175 (135 to 230) | 239 (181 to 318) | 36.7% (29.9% to 42.8%)    |
| 10 | Serbia     | Fire, heat, and hot substances                  | 4 (2 to 6)       | 4 (2 to 6)       | 0.7% (-5.9% to 7.6%)      |
| 11 | Serbia     | Foreign body in eyes                            | 0 (0 to 0)       | 0 (0 to 0)       | 0.9% (0.4% to 1.7%)       |
| 12 | Serbia     | Foreign body in other body part                 | 2 (1 to 5)       | 2 (1 to 5)       | 1.5% (-4.1% to 7%)        |
| 13 | Serbia     | Motor vehicle road injuries                     | 115 (89 to 146)  | 85 (65 to 107)   | -26.5% (-33.1% to -18.1%) |
| 14 | Serbia     | Motorcyclist road injuries                      | 19 (14 to 25)    | 13 (10 to 18)    | -28% (-37.8% to -17%)     |
| 15 | Serbia     | Non-venomous animal contact                     | 6 (3 to 11)      | 6 (3 to 11)      | -5.9% (-10.6% to -0.9%)   |
| 16 | Serbia     | Other exposure to mechanical forces             | 132 (82 to 208)  | 134 (81 to 212)  | 1% (-4.6% to 6.7%)        |
| 17 | Serbia     | Other road injuries                             | 2 (1 to 3)       | 1 (1 to 2)       | -11.9% (-21.5% to -0.8%)  |
| 18 | Serbia     | Other transport injuries                        | 7 (5 to 9)       | 6 (5 to 8)       | -10.8% (-18.2% to -3.2%)  |
| 19 | Serbia     | Other unintentional injuries                    | 37 (24 to 60)    | 29 (18 to 47)    | -23.3% (-31.3% to -15.1%) |
| 20 | Serbia     | Pedestrian road injuries                        | 44 (34 to 57)    | 28 (20 to 36)    | -37.2% (-44.2% to -29.8%) |
| 21 | Serbia     | Physical violence by firearm                    | 0 (0 to 1)       | 0 (0 to 1)       | -1.5% (-17.8% to 16.8%)   |
| 22 | Serbia     | Physical violence by other means                | 42 (29 to 59)    | 27 (19 to 38)    | -35.8% (-41.4% to -29.7%) |
| 23 | Serbia     | Physical violence by sharp object               | 3 (2 to 4)       | 2 (1 to 3)       | -31.2% (-40.4% to -21.6%) |
| 24 | Serbia     | Poisoning by carbon monoxide                    | 0 (0 to 0)       | 0 (0 to 0)       | 41.5% (29.6% to 56.2%)    |
| 25 | Serbia     | Poisoning by other means                        | 0 (0 to 1)       | 0 (0 to 1)       | 7.3% (-3.5% to 15.9%)     |
| 26 | Serbia     | Pulmonary aspiration and foreign body in airway | 1 (1 to 2)       | 1 (0 to 1)       | -15.1% (-24% to -7.2%)    |
| 27 | Serbia     | Self-harm by firearm                            | 1 (1 to 2)       | 1 (1 to 1)       | -13.9% (-23.3% to -2.1%)  |
| 28 | Serbia     | Self-harm by other specified means              | 3 (2 to 5)       | 2 (2 to 4)       | -31.7% (-36% to -27%)     |
| 29 | Serbia     | Unintentional firearm injuries                  | 1 (1 to 2)       | 1 (1 to 2)       | -13.4% (-22.3% to -5.1%)  |
| 30 | Serbia     | Venomous animal contact                         | 5 (2 to 10)      | 5 (2 to 9)       | -9.8% (-14.9% to -4.7%)   |
| 31 | Seychelles | Adverse effects of medical treatment            | 0 (0 to 0)       | 0 (0 to 0)       | 0% (0% to 0%)             |
| 32 | Seychelles | Conflict and terrorism                          | 0 (0 to 0)       | 0 (0 to 0)       | NA                        |
| 33 | Seychelles | Cyclist road injuries                           | 11 (6 to 18)     | 14 (9 to 22)     | 28.6% (16.1% to 42.4%)    |
| 34 | Seychelles | Drowning                                        | 0 (0 to 0)       | 0 (0 to 0)       | 11.1% (1% to 23.6%)       |
| 35 | Seychelles | Environmental heat and cold exposure            | 0 (0 to 0)       | 0 (0 to 0)       | 3.3% (-2.6% to 8.4%)      |
| 36 | Seychelles | Executions and police conflict                  | 0 (0 to 0)       | 0 (0 to 0)       | NA                        |
| 37 | Seychelles | Exposure to forces of nature                    | 0 (0 to 0)       | 0 (0 to 0)       | NA                        |
| 38 | Seychelles | Falls                                           | 30 (19 to 45)    | 35 (22 to 54)    | 17.3% (11.9% to 22.1%)    |
| 39 | Seychelles | Fire, heat, and hot substances                  | 0 (0 to 1)       | 0 (0 to 0)       | -30.3% (-35.4% to -24.9%) |
| 40 | Seychelles | Foreign body in eyes                            | 0 (0 to 0)       | 0 (0 to 0)       | 2.4% (1.1% to 4.1%)       |
| 41 | Seychelles | Foreign body in other body part                 | 1 (0 to 2)       | 1 (0 to 2)       | 1.1% (-3.4% to 6.1%)      |
| 42 | Seychelles | Motor vehicle road injuries                     | 29 (20 to 42)    | 37 (25 to 53)    | 26.8% (15.3% to 39.3%)    |
| 43 | Seychelles | Motorcyclist road injuries                      | 34 (25 to 46)    | 36 (26 to 49)    | 7.2% (-2.9% to 18.1%)     |
| 44 | Seychelles | Non-venomous animal contact                     | 2 (1 to 4)       | 2 (1 to 3)       | -16.5% (-20.3% to -11%)   |
| 45 |            |                                                 |                  |                  |                           |
| 46 |            |                                                 |                  |                  |                           |

|    |              |                                                 |               |               |                           |
|----|--------------|-------------------------------------------------|---------------|---------------|---------------------------|
| 1  |              |                                                 |               |               |                           |
| 2  | Seychelles   | Other exposure to mechanical forces             | 35 (18 to 65) | 28 (14 to 52) | -21.9% (-29.7% to -16.4%) |
| 3  | Seychelles   | Other road injuries                             | 2 (1 to 3)    | 2 (1 to 4)    | 25.6% (13.4% to 39.5%)    |
| 4  | Seychelles   | Other transport injuries                        | 3 (2 to 4)    | 3 (2 to 4)    | 1.1% (-6.2% to 7.1%)      |
| 5  | Seychelles   | Other unintentional injuries                    | 3 (2 to 6)    | 3 (2 to 5)    | -11.1% (-17.6% to -4.1%)  |
| 6  | Seychelles   | Pedestrian road injuries                        | 18 (13 to 25) | 21 (15 to 29) | 13.3% (4.5% to 22.5%)     |
| 7  | Seychelles   | Physical violence by firearm                    | 0 (0 to 1)    | 0 (0 to 1)    | 44.2% (29.8% to 60.6%)    |
| 8  | Seychelles   | Physical violence by other means                | 27 (18 to 41) | 23 (15 to 35) | -16% (-21.1% to -11.1%)   |
| 9  | Seychelles   | Physical violence by sharp object               | 5 (3 to 10)   | 4 (2 to 8)    | -20.3% (-28.1% to -13.1%) |
| 10 | Seychelles   | Poisoning by carbon monoxide                    | 0 (0 to 0)    | 0 (0 to 0)    | 9.8% (0.1% to 21.5%)      |
| 11 | Seychelles   | Poisoning by other means                        | 0 (0 to 0)    | 0 (0 to 0)    | -15.9% (-22.3% to -8.7%)  |
| 12 | Seychelles   | Pulmonary aspiration and foreign body in airway | 0 (0 to 0)    | 0 (0 to 0)    | -18.7% (-26.4% to -10.3%) |
| 13 | Seychelles   | Self-harm by firearm                            | 0 (0 to 0)    | 0 (0 to 0)    | 16% (1.2% to 34.7%)       |
| 14 | Seychelles   | Self-harm by other specified means              | 0 (0 to 0)    | 0 (0 to 0)    | 2.4% (-4.2% to 9.8%)      |
| 15 | Seychelles   | Unintentional firearm injuries                  | 1 (1 to 3)    | 1 (0 to 3)    | -10.9% (-20.6% to -0.9%)  |
| 16 | Sierra Leone | Venomous animal contact                         | 0 (0 to 1)    | 0 (0 to 1)    | -22.4% (-30.3% to -14.8%) |
| 17 | Sierra Leone | Adverse effects of medical treatment            | 0 (0 to 0)    | 0 (0 to 0)    | 0% (0% to 0%)             |
| 18 | Sierra Leone | Conflict and terrorism                          | 0 (0 to 0)    | 0 (0 to 0)    | NA                        |
| 19 | Sierra Leone | Cyclist road injuries                           | 25 (16 to 37) | 28 (17 to 41) | 12.8% (5.5% to 20.7%)     |
| 20 | Sierra Leone | Drowning                                        | 0 (0 to 0)    | 0 (0 to 0)    | -16.4% (-22.1% to -11%)   |
| 21 | Sierra Leone | Environmental heat and cold exposure            | 0 (0 to 1)    | 0 (0 to 1)    | 3% (-3.2% to 9.2%)        |
| 22 | Sierra Leone | Executions and police conflict                  | 0 (0 to 0)    | 0 (0 to 1)    | NA                        |
| 23 | Sierra Leone | Exposure to forces of nature                    | 0 (0 to 0)    | 0 (0 to 0)    | NA                        |
| 24 | Sierra Leone | Falls                                           | 17 (11 to 26) | 19 (12 to 29) | 9.8% (5.2% to 14.8%)      |
| 25 | Sierra Leone | Fire, heat, and hot substances                  | 0 (0 to 0)    | 0 (0 to 0)    | -6.6% (-12.2% to -0.2%)   |
| 26 | Sierra Leone | Foreign body in eyes                            | 0 (0 to 0)    | 0 (0 to 0)    | 0.1% (-0.2% to 0.5%)      |
| 27 | Sierra Leone | Foreign body in other body part                 | 4 (2 to 8)    | 3 (1 to 8)    | -3.6% (-8.6% to 1.8%)     |
| 28 | Sierra Leone | Motor vehicle road injuries                     | 49 (34 to 69) | 58 (40 to 81) | 18.6% (10.6% to 27.4%)    |
| 29 | Sierra Leone | Motorcyclist road injuries                      | 40 (29 to 53) | 41 (30 to 56) | 3.7% (-3.1% to 10%)       |
| 30 | Sierra Leone | Non-venomous animal contact                     | 3 (1 to 5)    | 3 (1 to 6)    | 1.1% (-3.6% to 6.1%)      |
| 31 | Sierra Leone | Other exposure to mechanical forces             | 25 (13 to 45) | 22 (11 to 40) | -12.1% (-17% to -7.5%)    |
| 32 | Sierra Leone | Other road injuries                             | 2 (1 to 4)    | 2 (1 to 4)    | 17.3% (7.2% to 27.2%)     |
| 33 | Sierra Leone | Other transport injuries                        | 3 (2 to 4)    | 3 (2 to 4)    | -7.1% (-12.4% to -1.3%)   |
| 34 | Sierra Leone | Other unintentional injuries                    | 3 (2 to 5)    | 2 (1 to 4)    | -18.7% (-23.8% to -13.1%) |
| 35 | Sierra Leone | Pedestrian road injuries                        | 32 (22 to 43) | 37 (26 to 50) | 15.8% (8% to 23.8%)       |
| 36 | Sierra Leone | Physical violence by firearm                    | 0 (0 to 0)    | 0 (0 to 0)    | 25.5% (10.8% to 42.8%)    |
| 37 | Sierra Leone | Physical violence by other means                | 4 (3 to 6)    | 4 (2 to 6)    | -7.1% (-12.4% to -1.5%)   |
| 38 | Sierra Leone | Physical violence by sharp object               | 1 (1 to 2)    | 1 (1 to 2)    | -3.9% (-10.5% to 2.7%)    |
| 39 | Sierra Leone | Poisoning by carbon monoxide                    | 0 (0 to 0)    | 0 (0 to 0)    | 4.5% (-6.3% to 17.2%)     |
| 40 | Sierra Leone | Poisoning by other means                        | 0 (0 to 0)    | 0 (0 to 0)    | -17.4% (-24.5% to -10.8%) |
| 41 | Sierra Leone | Pulmonary aspiration and foreign body in airway | 0 (0 to 0)    | 0 (0 to 0)    | -11.1% (-21.2% to -0.5%)  |
| 42 | Sierra Leone | Self-harm by firearm                            | 0 (0 to 0)    | 0 (0 to 0)    | 29.5% (21% to 38.1%)      |
| 43 | Sierra Leone | Self-harm by other specified means              | 0 (0 to 0)    | 0 (0 to 0)    | 35.4% (28.4% to 43%)      |
| 44 | Sierra Leone | Unintentional firearm injuries                  | 1 (0 to 2)    | 1 (0 to 2)    | -15.2% (-22.1% to -7.6%)  |
| 45 |              |                                                 |               |               |                           |
| 46 |              |                                                 |               |               |                           |



|    |              |                                                 |                  |                  |                           |
|----|--------------|-------------------------------------------------|------------------|------------------|---------------------------|
| 1  |              |                                                 |                  |                  |                           |
| 2  | Sierra Leone | Venomous animal contact                         | 0 (0 to 1)       | 0 (0 to 1)       | 4.1% (-3% to 11.7%)       |
| 3  | Singapore    | Adverse effects of medical treatment            | 0 (0 to 0)       | 0 (0 to 0)       | 0% (0% to 0%)             |
| 4  | Singapore    | Conflict and terrorism                          | 0 (0 to 0)       | 0 (0 to 0)       | NA                        |
| 5  | Singapore    | Cyclist road injuries                           | 21 (15 to 28)    | 17 (12 to 22)    | -20.8% (-30.4% to -9.8%)  |
| 6  | Singapore    | Drowning                                        | 0 (0 to 1)       | 1 (0 to 1)       | 136.6% (115.1% to 156.4%) |
| 7  | Singapore    | Environmental heat and cold exposure            | 5 (3 to 7)       | 5 (4 to 7)       | 9% (4.7% to 14.3%)        |
| 8  | Singapore    | Executions and police conflict                  | 0 (0 to 0)       | 0 (0 to 0)       | NA                        |
| 9  | Singapore    | Exposure to forces of nature                    | 0 (0 to 0)       | 0 (0 to 0)       | NA                        |
| 10 | Singapore    | Falls                                           | 153 (118 to 200) | 156 (119 to 206) | 1.9% (-3.5% to 7.1%)      |
| 11 | Singapore    | Fire, heat, and hot substances                  | 3 (2 to 5)       | 3 (2 to 5)       | 1.8% (-2.3% to 6.1%)      |
| 12 | Singapore    | Foreign body in eyes                            | 0 (0 to 0)       | 0 (0 to 0)       | 0.7% (0.1% to 1.7%)       |
| 13 | Singapore    | Foreign body in other body part                 | 2 (1 to 5)       | 2 (1 to 5)       | -4.5% (-7.7% to -1.1%)    |
| 14 | Singapore    | Motor vehicle road injuries                     | 20 (15 to 26)    | 17 (12 to 23)    | -17.1% (-28% to -5.7%)    |
| 15 | Singapore    | Motorcyclist road injuries                      | 17 (13 to 22)    | 10 (7 to 13)     | -41.9% (-52% to -30.8%)   |
| 16 | Singapore    | Non-venomous animal contact                     | 6 (3 to 10)      | 4 (2 to 7)       | -26.9% (-29.8% to -23.4%) |
| 17 | Singapore    | Other exposure to mechanical forces             | 76 (47 to 120)   | 68 (41 to 108)   | -11.3% (-18.2% to -5.1%)  |
| 18 | Singapore    | Other road injuries                             | 1 (1 to 2)       | 1 (0 to 2)       | -17.1% (-27.6% to -5.5%)  |
| 19 | Singapore    | Other transport injuries                        | 7 (5 to 9)       | 6 (5 to 9)       | -5.9% (-9.4% to -1.9%)    |
| 20 | Singapore    | Other unintentional injuries                    | 37 (24 to 58)    | 30 (19 to 49)    | -17.2% (-24.3% to -11.1%) |
| 21 | Singapore    | Pedestrian road injuries                        | 10 (7 to 13)     | 7 (5 to 9)       | -28% (-38.7% to -16.8%)   |
| 22 | Singapore    | Physical violence by firearm                    | 0 (0 to 1)       | 1 (0 to 1)       | 56.1% (34.5% to 82.5%)    |
| 23 | Singapore    | Physical violence by other means                | 17 (12 to 24)    | 13 (9 to 19)     | -22.7% (-31.6% to -13.4%) |
| 24 | Singapore    | Physical violence by sharp object               | 2 (1 to 3)       | 1 (1 to 2)       | -28% (-41% to -14.9%)     |
| 25 | Singapore    | Poisoning by carbon monoxide                    | 0 (0 to 0)       | 0 (0 to 0)       | 13.4% (4% to 23.1%)       |
| 26 | Singapore    | Poisoning by other means                        | 0 (0 to 1)       | 0 (0 to 0)       | -5.5% (-10.3% to -0.4%)   |
| 27 | Singapore    | Pulmonary aspiration and foreign body in airway | 1 (0 to 1)       | 0 (0 to 1)       | -14.6% (-21.3% to -7.3%)  |
| 28 | Singapore    | Self-harm by firearm                            | 0 (0 to 0)       | 0 (0 to 0)       | 11.2% (-5.2% to 33.1%)    |
| 29 | Singapore    | Self-harm by other specified means              | 4 (2 to 6)       | 2 (2 to 4)       | -35.1% (-38.7% to -31%)   |
| 30 | Singapore    | Unintentional firearm injuries                  | 1 (1 to 2)       | 1 (1 to 2)       | 1% (-8.8% to 11.1%)       |
| 31 | Slovakia     | Venomous animal contact                         | 2 (1 to 5)       | 2 (1 to 4)       | -24.9% (-29.1% to -19.8%) |
| 32 | Slovakia     | Adverse effects of medical treatment            | 0 (0 to 0)       | 0 (0 to 0)       | 0% (0% to 0%)             |
| 33 | Slovakia     | Conflict and terrorism                          | 0 (0 to 0)       | 0 (0 to 0)       | NA                        |
| 34 | Slovakia     | Cyclist road injuries                           | 87 (64 to 112)   | 61 (45 to 82)    | -29.5% (-38.3% to -20.8%) |
| 35 | Slovakia     | Drowning                                        | 0 (0 to 0)       | 1 (0 to 1)       | 79.7% (60.6% to 104.2%)   |
| 36 | Slovakia     | Environmental heat and cold exposure            | 3 (2 to 3)       | 2 (2 to 3)       | -7.3% (-11.7% to -2.8%)   |
| 37 | Slovakia     | Executions and police conflict                  | 0 (0 to 0)       | 0 (0 to 0)       | NA                        |
| 38 | Slovakia     | Exposure to forces of nature                    | 0 (0 to 0)       | 0 (0 to 0)       | NA                        |
| 39 | Slovakia     | Falls                                           | 352 (281 to 444) | 368 (290 to 466) | 4.4% (-0.2% to 9.2%)      |
| 40 | Slovakia     | Fire, heat, and hot substances                  | 4 (2 to 6)       | 4 (2 to 6)       | -4.1% (-9.7% to 1.5%)     |
| 41 | Slovakia     | Foreign body in eyes                            | 0 (0 to 0)       | 0 (0 to 0)       | 0.5% (0.2% to 1%)         |
| 42 | Slovakia     | Foreign body in other body part                 | 2 (1 to 5)       | 2 (1 to 5)       | 1.4% (-4.1% to 7.1%)      |
| 43 | Slovakia     | Motor vehicle road injuries                     | 124 (95 to 157)  | 93 (71 to 118)   | -25.2% (-34.1% to -15.7%) |
| 44 | Slovakia     | Motorcyclist road injuries                      | 19 (14 to 25)    | 15 (11 to 20)    | -18.4% (-30.3% to -6.1%)  |
| 45 |              |                                                 |                  |                  |                           |
| 46 |              |                                                 |                  |                  |                           |

|    |          |                                                 |                  |                  |                           |
|----|----------|-------------------------------------------------|------------------|------------------|---------------------------|
| 1  |          |                                                 |                  |                  |                           |
| 2  | Slovakia | Non-venomous animal contact                     | 6 (3 to 11)      | 5 (3 to 9)       | -21.9% (-26.3% to -17.9%) |
| 3  | Slovakia | Other exposure to mechanical forces             | 163 (104 to 256) | 148 (92 to 230)  | -9.5% (-17% to -2.9%)     |
| 4  | Slovakia | Other road injuries                             | 1 (1 to 2)       | 1 (1 to 2)       | -5% (-15.8% to 7.4%)      |
| 5  | Slovakia | Other transport injuries                        | 9 (7 to 12)      | 7 (5 to 10)      | -19.9% (-25.4% to -14.3%) |
| 6  | Slovakia | Other unintentional injuries                    | 31 (20 to 51)    | 28 (17 to 46)    | -10.2% (-15.8% to -3.9%)  |
| 7  | Slovakia | Pedestrian road injuries                        | 50 (39 to 64)    | 28 (21 to 37)    | -44% (-50.5% to -36.7%)   |
| 8  | Slovakia | Physical violence by firearm                    | 0 (0 to 0)       | 0 (0 to 1)       | 43.5% (24.9% to 62.9%)    |
| 9  | Slovakia | Physical violence by other means                | 32 (22 to 45)    | 26 (18 to 37)    | -17.5% (-24.6% to -10.4%) |
| 10 | Slovakia | Physical violence by sharp object               | 2 (1 to 4)       | 2 (1 to 3)       | -19.7% (-28.4% to -11.8%) |
| 11 | Slovakia | Poisoning by carbon monoxide                    | 0 (0 to 0)       | 0 (0 to 0)       | 27.2% (17% to 40%)        |
| 12 | Slovakia | Poisoning by other means                        | 0 (0 to 1)       | 0 (0 to 1)       | -2.7% (-10.3% to 4.4%)    |
| 13 | Slovakia | Pulmonary aspiration and foreign body in airway | 1 (1 to 2)       | 1 (1 to 2)       | -17.9% (-24.2% to -10.2%) |
| 14 | Slovakia | Self-harm by firearm                            | 1 (0 to 1)       | 1 (0 to 1)       | -8.5% (-20.8% to 4.9%)    |
| 15 | Slovakia | Self-harm by other specified means              | 3 (2 to 4)       | 2 (2 to 4)       | -13.1% (-18.7% to -7.5%)  |
| 16 | Slovakia | Unintentional firearm injuries                  | 1 (1 to 2)       | 1 (1 to 2)       | -16.5% (-26.5% to -7.1%)  |
| 17 | Slovakia | Venomous animal contact                         | 5 (2 to 9)       | 4 (2 to 8)       | -19% (-23.5% to -13.9%)   |
| 18 | Slovenia | Adverse effects of medical treatment            | 0 (0 to 0)       | 0 (0 to 0)       | 0% (0% to 0%)             |
| 19 | Slovenia | Conflict and terrorism                          | 0 (0 to 0)       | 0 (0 to 0)       | NA                        |
| 20 | Slovenia | Cyclist road injuries                           | 100 (72 to 132)  | 70 (50 to 94)    | -30.4% (-38.2% to -21.6%) |
| 21 | Slovenia | Drowning                                        | 0 (0 to 0)       | 1 (0 to 1)       | 141.3% (113.8% to 172.1%) |
| 22 | Slovenia | Environmental heat and cold exposure            | 2 (2 to 3)       | 2 (1 to 2)       | -36.5% (-42.8% to -30.5%) |
| 23 | Slovenia | Executions and police conflict                  | 0 (0 to 0)       | 0 (0 to 0)       | NA                        |
| 24 | Slovenia | Exposure to forces of nature                    | 0 (0 to 1)       | 0 (0 to 0)       | NA                        |
| 25 | Slovenia | Falls                                           | 397 (318 to 501) | 401 (320 to 504) | 1% (-3.9% to 6.1%)        |
| 26 | Slovenia | Fire, heat, and hot substances                  | 4 (2 to 6)       | 4 (2 to 7)       | 2.5% (-2.8% to 8%)        |
| 27 | Slovenia | Foreign body in eyes                            | 0 (0 to 0)       | 0 (0 to 0)       | 1.4% (0.6% to 2.7%)       |
| 28 | Slovenia | Foreign body in other body part                 | 3 (1 to 6)       | 3 (1 to 6)       | 2.2% (-3.4% to 8.5%)      |
| 29 | Slovenia | Motor vehicle road injuries                     | 213 (168 to 269) | 102 (78 to 129)  | -52% (-56.8% to -46.3%)   |
| 30 | Slovenia | Motorcyclist road injuries                      | 28 (21 to 37)    | 24 (18 to 32)    | -14.4% (-26.5% to 0.6%)   |
| 31 | Slovenia | Non-venomous animal contact                     | 6 (3 to 11)      | 5 (3 to 9)       | -15.7% (-20.2% to -10.5%) |
| 32 | Slovenia | Other exposure to mechanical forces             | 192 (122 to 298) | 166 (104 to 261) | -13.5% (-20.6% to -5.6%)  |
| 33 | Slovenia | Other road injuries                             | 2 (1 to 3)       | 1 (1 to 3)       | -12.6% (-23.6% to -1.1%)  |
| 34 | Slovenia | Other transport injuries                        | 7 (5 to 9)       | 7 (5 to 9)       | -3% (-8% to 2.2%)         |
| 35 | Slovenia | Other unintentional injuries                    | 32 (20 to 52)    | 35 (21 to 58)    | 8.6% (1.7% to 15.3%)      |
| 36 | Slovenia | Pedestrian road injuries                        | 45 (34 to 58)    | 27 (20 to 36)    | -39.8% (-48.6% to -29.4%) |
| 37 | Slovenia | Physical violence by firearm                    | 0 (0 to 1)       | 0 (0 to 1)       | 22.6% (6% to 41.2%)       |
| 38 | Slovenia | Physical violence by other means                | 30 (21 to 42)    | 24 (17 to 35)    | -18.4% (-26.5% to -10.4%) |
| 39 | Slovenia | Physical violence by sharp object               | 3 (2 to 5)       | 2 (1 to 3)       | -26% (-37.3% to -16%)     |
| 40 | Slovenia | Poisoning by carbon monoxide                    | 0 (0 to 0)       | 0 (0 to 0)       | 32% (21.5% to 43.6%)      |
| 41 | Slovenia | Poisoning by other means                        | 0 (0 to 1)       | 0 (0 to 1)       | 0.8% (-6.2% to 8.1%)      |
| 42 | Slovenia | Pulmonary aspiration and foreign body in airway | 1 (0 to 2)       | 1 (0 to 1)       | -4.6% (-12.3% to 4%)      |
| 43 | Slovenia | Self-harm by firearm                            | 1 (1 to 2)       | 1 (1 to 2)       | -23.9% (-33.6% to -12.6%) |
| 44 | Slovenia | Self-harm by other specified means              | 6 (4 to 9)       | 4 (2 to 5)       | -35.4% (-39.4% to -31.1%) |
| 45 |          |                                                 |                  |                  |                           |
| 46 |          |                                                 |                  |                  |                           |

|    |                 |                                                 |                 |                  |                          |
|----|-----------------|-------------------------------------------------|-----------------|------------------|--------------------------|
| 1  |                 |                                                 |                 |                  |                          |
| 2  | Slovenia        | Unintentional firearm injuries                  | 1 (1 to 2)      | 1 (1 to 2)       | 1.4% (-10.1% to 13.2%)   |
| 3  | Slovenia        | Venomous animal contact                         | 5 (2 to 9)      | 4 (2 to 8)       | -12.8% (-17.9% to -6.7%) |
| 4  | Solomon Islands | Adverse effects of medical treatment            | 0 (0 to 0)      | 0 (0 to 0)       | 0% (0% to 0%)            |
| 5  | Solomon Islands | Conflict and terrorism                          | 0 (0 to 0)      | 0 (0 to 0)       | NA                       |
| 6  | Solomon Islands | Cyclist road injuries                           | 10 (6 to 14)    | 10 (7 to 15)     | 6.5% (-0.7% to 14%)      |
| 7  | Solomon Islands | Drowning                                        | 1 (0 to 1)      | 1 (0 to 1)       | 0.3% (-9.5% to 11.3%)    |
| 8  | Solomon Islands | Environmental heat and cold exposure            | 2 (2 to 3)      | 2 (2 to 3)       | -5.3% (-11% to 0.3%)     |
| 9  | Solomon Islands | Executions and police conflict                  | 0 (0 to 0)      | 0 (0 to 0)       | NA                       |
| 10 | Solomon Islands | Exposure to forces of nature                    | 0 (0 to 0)      | 0 (0 to 0)       | NA                       |
| 11 | Solomon Islands | Falls                                           | 95 (74 to 124)  | 132 (103 to 170) | 39.3% (34.2% to 44.9%)   |
| 12 | Solomon Islands | Fire, heat, and hot substances                  | 2 (1 to 3)      | 1 (1 to 2)       | -10.8% (-17.5% to -4.7%) |
| 13 | Solomon Islands | Foreign body in eyes                            | 0 (0 to 0)      | 0 (0 to 0)       | -1.9% (-3.2% to -1%)     |
| 14 | Solomon Islands | Foreign body in other body part                 | 1 (0 to 1)      | 1 (0 to 1)       | -2.4% (-6.3% to 2.2%)    |
| 15 | Solomon Islands | Motor vehicle road injuries                     | 23 (17 to 31)   | 23 (17 to 29)    | -3.3% (-10.2% to 4.2%)   |
| 16 | Solomon Islands | Motorcyclist road injuries                      | 17 (13 to 22)   | 18 (14 to 24)    | 5.2% (-3.9% to 14.5%)    |
| 17 | Solomon Islands | Non-venomous animal contact                     | 6 (3 to 10)     | 5 (3 to 9)       | -16% (-20.6% to -11.4%)  |
| 18 | Solomon Islands | Other exposure to mechanical forces             | 11 (6 to 19)    | 10 (6 to 17)     | -11.9% (-16.9% to -6.9%) |
| 19 | Solomon Islands | Other road injuries                             | 1 (1 to 2)      | 1 (1 to 2)       | 4.8% (-4.1% to 14.7%)    |
| 20 | Solomon Islands | Other transport injuries                        | 8 (7 to 11)     | 8 (6 to 10)      | -9.4% (-13.9% to -5.2%)  |
| 21 | Solomon Islands | Other unintentional injuries                    | 10 (6 to 16)    | 9 (6 to 15)      | -7.5% (-12.4% to -2.1%)  |
| 22 | Solomon Islands | Pedestrian road injuries                        | 17 (12 to 21)   | 17 (12 to 22)    | 0.2% (-6.9% to 8.1%)     |
| 23 | Solomon Islands | Physical violence by firearm                    | 0 (0 to 0)      | 0 (0 to 0)       | -7.6% (-19.6% to 5.4%)   |
| 24 | Solomon Islands | Physical violence by other means                | 30 (21 to 42)   | 21 (15 to 31)    | -28.2% (-33% to -23.4%)  |
| 25 | Solomon Islands | Physical violence by sharp object               | 3 (2 to 5)      | 2 (1 to 4)       | -32.9% (-40% to -25.5%)  |
| 26 | Solomon Islands | Poisoning by carbon monoxide                    | 0 (0 to 0)      | 0 (0 to 0)       | 28.3% (15.4% to 43.5%)   |
| 27 | Solomon Islands | Poisoning by other means                        | 0 (0 to 0)      | 0 (0 to 0)       | -1.5% (-9.8% to 7.1%)    |
| 28 | Solomon Islands | Pulmonary aspiration and foreign body in airway | 0 (0 to 0)      | 0 (0 to 0)       | -2.7% (-13% to 9.4%)     |
| 29 | Solomon Islands | Self-harm by firearm                            | 1 (1 to 2)      | 1 (1 to 2)       | -0.1% (-13.3% to 12.7%)  |
| 30 | Solomon Islands | Self-harm by other specified means              | 2 (1 to 4)      | 3 (2 to 4)       | 19% (9.6% to 29.9%)      |
| 31 | Solomon Islands | Unintentional firearm injuries                  | 2 (1 to 3)      | 2 (1 to 3)       | -14.4% (-20.5% to -8%)   |
| 32 | Solomon Islands | Venomous animal contact                         | 3 (1 to 6)      | 3 (1 to 5)       | -10.2% (-15.8% to -3.2%) |
| 33 | Somalia         | Adverse effects of medical treatment            | 0 (0 to 0)      | 0 (0 to 0)       | 0% (0% to 0%)            |
| 34 | Somalia         | Conflict and terrorism                          | 177 (54 to 466) | 38 (12 to 96)    | NA                       |
| 35 | Somalia         | Cyclist road injuries                           | 29 (19 to 43)   | 33 (22 to 48)    | 11.6% (3.5% to 20.6%)    |
| 36 | Somalia         | Drowning                                        | 0 (0 to 0)      | 0 (0 to 0)       | -12.4% (-17.7% to -6.8%) |
| 37 | Somalia         | Environmental heat and cold exposure            | 0 (0 to 1)      | 0 (0 to 1)       | -3.7% (-8.8% to 1.3%)    |
| 38 | Somalia         | Executions and police conflict                  | 0 (0 to 0)      | 1 (0 to 3)       | NA                       |
| 39 | Somalia         | Exposure to forces of nature                    | 0 (0 to 0)      | 0 (0 to 0)       | NA                       |
| 40 | Somalia         | Falls                                           | 20 (12 to 31)   | 22 (14 to 34)    | 10.8% (6.8% to 14.8%)    |
| 41 | Somalia         | Fire, heat, and hot substances                  | 0 (0 to 1)      | 0 (0 to 1)       | -11% (-16.1% to -6.4%)   |
| 42 | Somalia         | Foreign body in eyes                            | 0 (0 to 0)      | 0 (0 to 0)       | -0.9% (-2.2% to -0.1%)   |
| 43 | Somalia         | Foreign body in other body part                 | 3 (1 to 7)      | 3 (1 to 7)       | -4.1% (-10.5% to 1.7%)   |
| 44 | Somalia         | Motor vehicle road injuries                     | 35 (24 to 50)   | 33 (22 to 47)    | -7.5% (-15% to 0.4%)     |
| 45 |                 |                                                 |                 |                  |                          |
| 46 |                 |                                                 |                 |                  |                          |

|    |              |                                                 |               |               |                           |
|----|--------------|-------------------------------------------------|---------------|---------------|---------------------------|
| 1  |              |                                                 |               |               |                           |
| 2  | Somalia      | Motorcyclist road injuries                      | 20 (14 to 27) | 23 (17 to 32) | 20.3% (11.2% to 29.9%)    |
| 3  | Somalia      | Non-venomous animal contact                     | 9 (4 to 17)   | 9 (4 to 18)   | 3.5% (-1% to 8.9%)        |
| 4  | Somalia      | Other exposure to mechanical forces             | 28 (14 to 50) | 27 (13 to 49) | -4.4% (-9% to 2%)         |
| 5  | Somalia      | Other road injuries                             | 1 (1 to 2)    | 1 (1 to 2)    | -5.6% (-13.3% to 3%)      |
| 6  | Somalia      | Other transport injuries                        | 3 (2 to 4)    | 3 (2 to 5)    | 6.9% (1.3% to 12.2%)      |
| 7  | Somalia      | Other unintentional injuries                    | 3 (2 to 5)    | 3 (2 to 5)    | -11.3% (-15.8% to -6.4%)  |
| 8  | Somalia      | Pedestrian road injuries                        | 61 (45 to 81) | 54 (39 to 71) | -12% (-17.1% to -6.2%)    |
| 9  | Somalia      | Physical violence by firearm                    | 0 (0 to 0)    | 0 (0 to 0)    | 27% (15.9% to 37.9%)      |
| 10 | Somalia      | Physical violence by other means                | 8 (6 to 13)   | 10 (6 to 14)  | 14.7% (6.7% to 22.9%)     |
| 11 | Somalia      | Physical violence by sharp object               | 2 (1 to 4)    | 3 (1 to 5)    | 22.2% (12.4% to 32.9%)    |
| 12 | Somalia      | Poisoning by carbon monoxide                    | 0 (0 to 0)    | 0 (0 to 0)    | -0.3% (-10.3% to 11.3%)   |
| 13 | Somalia      | Poisoning by other means                        | 0 (0 to 0)    | 0 (0 to 0)    | -15.5% (-21.7% to -8.6%)  |
| 14 | Somalia      | Pulmonary aspiration and foreign body in airway | 0 (0 to 0)    | 0 (0 to 0)    | -8.8% (-19.1% to 3.3%)    |
| 15 | Somalia      | Self-harm by firearm                            | 0 (0 to 0)    | 0 (0 to 0)    | 8% (-0.1% to 17.4%)       |
| 16 | Somalia      | Self-harm by other specified means              | 0 (0 to 0)    | 0 (0 to 0)    | 1.2% (-4.1% to 7.1%)      |
| 17 | Somalia      | Unintentional firearm injuries                  | 1 (1 to 3)    | 1 (1 to 3)    | -4.2% (-10.7% to 3.5%)    |
| 18 | Somalia      | Venomous animal contact                         | 2 (0 to 5)    | 2 (0 to 5)    | 5.9% (-0.8% to 13.4%)     |
| 19 | South Africa | Adverse effects of medical treatment            | 0 (0 to 0)    | 0 (0 to 0)    | 0% (0% to 0%)             |
| 20 | South Africa | Conflict and terrorism                          | 4 (1 to 11)   | 0 (0 to 1)    | NA                        |
| 21 | South Africa | Cyclist road injuries                           | 13 (7 to 20)  | 12 (7 to 19)  | -5% (-11.1% to 1.1%)      |
| 22 | South Africa | Drowning                                        | 0 (0 to 0)    | 0 (0 to 0)    | -36% (-42% to -28.5%)     |
| 23 | South Africa | Environmental heat and cold exposure            | 0 (0 to 1)    | 0 (0 to 1)    | -4.3% (-9.4% to 0.6%)     |
| 24 | South Africa | Executions and police conflict                  | 0 (0 to 0)    | 0 (0 to 0)    | NA                        |
| 25 | South Africa | Exposure to forces of nature                    | 0 (0 to 0)    | 0 (0 to 0)    | NA                        |
| 26 | South Africa | Falls                                           | 22 (13 to 34) | 20 (12 to 32) | -5.8% (-9.1% to -2.5%)    |
| 27 | South Africa | Fire, heat, and hot substances                  | 0 (0 to 0)    | 0 (0 to 0)    | -33.4% (-37.6% to -29%)   |
| 28 | South Africa | Foreign body in eyes                            | 0 (0 to 0)    | 0 (0 to 0)    | 0.2% (-0.1% to 0.7%)      |
| 29 | South Africa | Foreign body in other body part                 | 5 (2 to 10)   | 5 (2 to 10)   | 2.4% (0.1% to 4.9%)       |
| 30 | South Africa | Motor vehicle road injuries                     | 54 (36 to 75) | 40 (27 to 56) | -26% (-30.5% to -21.3%)   |
| 31 | South Africa | Motorcyclist road injuries                      | 13 (9 to 20)  | 11 (7 to 16)  | -20.4% (-25.4% to -15.6%) |
| 32 | South Africa | Non-venomous animal contact                     | 3 (1 to 5)    | 3 (1 to 5)    | -6.6% (-12.4% to -0.7%)   |
| 33 | South Africa | Other exposure to mechanical forces             | 32 (16 to 59) | 26 (13 to 46) | -21.3% (-25.4% to -16.5%) |
| 34 | South Africa | Other road injuries                             | 2 (1 to 3)    | 2 (1 to 3)    | -1.8% (-8% to 4.8%)       |
| 35 | South Africa | Other transport injuries                        | 4 (3 to 5)    | 4 (2 to 5)    | -3.3% (-9.3% to 2%)       |
| 36 | South Africa | Other unintentional injuries                    | 2 (1 to 4)    | 2 (1 to 4)    | -12.8% (-18.5% to -7.8%)  |
| 37 | South Africa | Pedestrian road injuries                        | 47 (34 to 65) | 37 (26 to 50) | -22.7% (-27.6% to -18%)   |
| 38 | South Africa | Physical violence by firearm                    | 2 (1 to 3)    | 1 (0 to 1)    | -56.8% (-64.6% to -45.5%) |
| 39 | South Africa | Physical violence by other means                | 41 (26 to 65) | 25 (15 to 38) | -40.3% (-43.6% to -36.9%) |
| 40 | South Africa | Physical violence by sharp object               | 12 (6 to 22)  | 8 (4 to 15)   | -35.2% (-39.8% to -29.7%) |
| 41 | South Africa | Poisoning by carbon monoxide                    | 0 (0 to 0)    | 0 (0 to 0)    | -8.5% (-31.6% to 12.3%)   |
| 42 | South Africa | Poisoning by other means                        | 0 (0 to 0)    | 0 (0 to 0)    | -28.5% (-45.6% to -9.8%)  |
| 43 | South Africa | Pulmonary aspiration and foreign body in airway | 0 (0 to 0)    | 0 (0 to 0)    | -16.4% (-23.3% to -10.7%) |
| 44 | South Africa | Self-harm by firearm                            | 0 (0 to 0)    | 0 (0 to 0)    | -18.6% (-26.3% to -8.7%)  |
| 45 |              |                                                 |               |               |                           |
| 46 |              |                                                 |               |               |                           |

|    |              |                                                 |                  |                  |                           |
|----|--------------|-------------------------------------------------|------------------|------------------|---------------------------|
| 1  |              |                                                 |                  |                  |                           |
| 2  | South Africa | Self-harm by other specified means              | 0 (0 to 1)       | 0 (0 to 0)       | -32.8% (-37.7% to -27.3%) |
| 3  | South Africa | Unintentional firearm injuries                  | 1 (0 to 1)       | 1 (0 to 1)       | -10.3% (-18.4% to -1.2%)  |
| 4  | South Africa | Venomous animal contact                         | 0 (0 to 1)       | 0 (0 to 1)       | -0.1% (-10.1% to 10.3%)   |
| 5  | South Sudan  | Adverse effects of medical treatment            | 0 (0 to 0)       | 0 (0 to 0)       | 0% (0% to 0%)             |
| 6  | South Sudan  | Conflict and terrorism                          | 0 (0 to 0)       | 23 (7 to 59)     | NA                        |
| 7  | South Sudan  | Cyclist road injuries                           | 34 (22 to 50)    | 32 (21 to 48)    | -7.2% (-13.1% to -0.8%)   |
| 8  | South Sudan  | Drowning                                        | 0 (0 to 0)       | 0 (0 to 0)       | -11.6% (-17.9% to -5.1%)  |
| 9  | South Sudan  | Environmental heat and cold exposure            | 0 (0 to 1)       | 0 (0 to 1)       | -6.7% (-11.5% to -1.7%)   |
| 10 | South Sudan  | Executions and police conflict                  | 0 (0 to 0)       | 0 (0 to 1)       | NA                        |
| 11 | South Sudan  | Exposure to forces of nature                    | 0 (0 to 0)       | 0 (0 to 0)       | NA                        |
| 12 | South Sudan  | Falls                                           | 21 (13 to 33)    | 23 (14 to 36)    | 8.7% (4.9% to 13.3%)      |
| 13 | South Sudan  | Fire, heat, and hot substances                  | 0 (0 to 1)       | 0 (0 to 1)       | -10.7% (-15.2% to -7%)    |
| 14 | South Sudan  | Foreign body in eyes                            | 0 (0 to 0)       | 0 (0 to 0)       | -1.6% (-3.9% to -0.1%)    |
| 15 | South Sudan  | Foreign body in other body part                 | 3 (1 to 7)       | 3 (1 to 7)       | -5.9% (-10.7% to -1.3%)   |
| 16 | South Sudan  | Motor vehicle road injuries                     | 50 (33 to 71)    | 44 (29 to 62)    | -12% (-18.1% to -5.6%)    |
| 17 | South Sudan  | Motorcyclist road injuries                      | 20 (14 to 29)    | 19 (13 to 26)    | -9% (-15.3% to -2.2%)     |
| 18 | South Sudan  | Non-venomous animal contact                     | 6 (3 to 12)      | 6 (3 to 11)      | -10.9% (-14.9% to -7.1%)  |
| 19 | South Sudan  | Other exposure to mechanical forces             | 36 (18 to 66)    | 33 (16 to 61)    | -7.8% (-12.1% to -3.5%)   |
| 20 | South Sudan  | Other road injuries                             | 2 (1 to 4)       | 2 (1 to 3)       | -8.5% (-16% to -0.3%)     |
| 21 | South Sudan  | Other transport injuries                        | 3 (2 to 4)       | 3 (2 to 4)       | -4% (-8.2% to 0.5%)       |
| 22 | South Sudan  | Other unintentional injuries                    | 3 (2 to 5)       | 3 (2 to 5)       | -12.6% (-16.4% to -8.5%)  |
| 23 | South Sudan  | Pedestrian road injuries                        | 80 (60 to 105)   | 65 (48 to 85)    | -19.2% (-24.3% to -13.9%) |
| 24 | South Sudan  | Physical violence by firearm                    | 0 (0 to 0)       | 0 (0 to 0)       | 55.5% (41.7% to 71.1%)    |
| 25 | South Sudan  | Physical violence by other means                | 9 (6 to 14)      | 13 (9 to 20)     | 49.4% (37.3% to 62.5%)    |
| 26 | South Sudan  | Physical violence by sharp object               | 2 (1 to 4)       | 4 (2 to 7)       | 50.4% (37.2% to 65%)      |
| 27 | South Sudan  | Poisoning by carbon monoxide                    | 0 (0 to 0)       | 0 (0 to 0)       | 3.4% (-5.3% to 13.9%)     |
| 28 | South Sudan  | Poisoning by other means                        | 0 (0 to 0)       | 0 (0 to 0)       | -15.7% (-21.9% to -9.9%)  |
| 29 | South Sudan  | Pulmonary aspiration and foreign body in airway | 0 (0 to 0)       | 0 (0 to 0)       | -6.7% (-16.8% to 3.6%)    |
| 30 | South Sudan  | Self-harm by firearm                            | 0 (0 to 0)       | 0 (0 to 0)       | -6% (-12.1% to 1.1%)      |
| 31 | South Sudan  | Self-harm by other specified means              | 0 (0 to 0)       | 0 (0 to 0)       | -12.2% (-17.5% to -6.8%)  |
| 32 | South Sudan  | Unintentional firearm injuries                  | 1 (0 to 2)       | 1 (0 to 2)       | -12.6% (-18.6% to -6.7%)  |
| 33 | South Sudan  | Venomous animal contact                         | 1 (0 to 3)       | 1 (0 to 3)       | -9.9% (-16.8% to -3.5%)   |
| 34 | Spain        | Adverse effects of medical treatment            | 0 (0 to 0)       | 0 (0 to 0)       | 0% (0% to 0%)             |
| 35 | Spain        | Conflict and terrorism                          | 1 (0 to 2)       | 0 (0 to 0)       | NA                        |
| 36 | Spain        | Cyclist road injuries                           | 27 (19 to 37)    | 19 (14 to 26)    | -30% (-40.6% to -17%)     |
| 37 | Spain        | Drowning                                        | 0 (0 to 0)       | 0 (0 to 0)       | 35.7% (21.1% to 49%)      |
| 38 | Spain        | Environmental heat and cold exposure            | 2 (2 to 3)       | 2 (1 to 3)       | -1.6% (-6.2% to 2.9%)     |
| 39 | Spain        | Executions and police conflict                  | 0 (0 to 0)       | 0 (0 to 0)       | NA                        |
| 40 | Spain        | Exposure to forces of nature                    | 0 (0 to 0)       | 0 (0 to 0)       | NA                        |
| 41 | Spain        | Falls                                           | 184 (143 to 240) | 227 (174 to 296) | 23% (15.3% to 31.3%)      |
| 42 | Spain        | Fire, heat, and hot substances                  | 2 (1 to 3)       | 2 (1 to 3)       | -4.6% (-9.2% to 1.1%)     |
| 43 | Spain        | Foreign body in eyes                            | 0 (0 to 0)       | 0 (0 to 0)       | 0.4% (0.1% to 0.8%)       |
| 44 | Spain        | Foreign body in other body part                 | 2 (1 to 3)       | 2 (1 to 3)       | 2.1% (-2.1% to 6.8%)      |
| 45 |              |                                                 |                  |                  |                           |
| 46 |              |                                                 |                  |                  |                           |

|    |           |                                                 |                 |                  |                           |
|----|-----------|-------------------------------------------------|-----------------|------------------|---------------------------|
| 1  |           |                                                 |                 |                  |                           |
| 2  | Spain     | Motor vehicle road injuries                     | 63 (49 to 78)   | 21 (15 to 27)    | -66.7% (-72.3% to -60.6%) |
| 3  | Spain     | Motorcyclist road injuries                      | 16 (12 to 21)   | 10 (7 to 13)     | -42.1% (-53% to -29.2%)   |
| 4  | Spain     | Non-venomous animal contact                     | 3 (1 to 4)      | 2 (1 to 4)       | -14.1% (-18.7% to -9.9%)  |
| 5  | Spain     | Other exposure to mechanical forces             | 52 (32 to 82)   | 43 (25 to 69)    | -18% (-26.5% to -10.7%)   |
| 6  | Spain     | Other road injuries                             | 2 (1 to 3)      | 1 (1 to 2)       | -27.1% (-38.9% to -13.2%) |
| 7  | Spain     | Other transport injuries                        | 5 (4 to 7)      | 5 (3 to 7)       | -11.6% (-17.2% to -5.5%)  |
| 8  | Spain     | Other unintentional injuries                    | 31 (20 to 49)   | 21 (13 to 34)    | -30.7% (-37.5% to -24.3%) |
| 9  | Spain     | Pedestrian road injuries                        | 18 (14 to 23)   | 7 (5 to 9)       | -64% (-70.5% to -56.4%)   |
| 10 | Spain     | Physical violence by firearm                    | 0 (0 to 1)      | 1 (0 to 1)       | 43.4% (28.2% to 60.7%)    |
| 11 | Spain     | Physical violence by other means                | 12 (8 to 17)    | 11 (7 to 16)     | -12.4% (-20.4% to -5.1%)  |
| 12 | Spain     | Physical violence by sharp object               | 1 (1 to 2)      | 1 (1 to 2)       | -8.4% (-20.3% to 2%)      |
| 13 | Spain     | Poisoning by carbon monoxide                    | 0 (0 to 0)      | 0 (0 to 0)       | 1.8% (-7.6% to 10.9%)     |
| 14 | Spain     | Poisoning by other means                        | 0 (0 to 0)      | 0 (0 to 0)       | -10.7% (-17.3% to -4.7%)  |
| 15 | Spain     | Pulmonary aspiration and foreign body in airway | 1 (1 to 2)      | 1 (1 to 2)       | -11% (-20.4% to -1.5%)    |
| 16 | Spain     | Self-harm by firearm                            | 0 (0 to 0)      | 0 (0 to 0)       | 7.3% (-5.5% to 21.6%)     |
| 17 | Spain     | Self-harm by other specified means              | 2 (1 to 3)      | 2 (1 to 2)       | -11.5% (-16.6% to -6%)    |
| 18 | Spain     | Unintentional firearm injuries                  | 1 (1 to 2)      | 1 (1 to 2)       | -27.2% (-37.8% to -17.8%) |
| 19 | Sri Lanka | Venomous animal contact                         | 1 (0 to 2)      | 1 (0 to 2)       | -14.3% (-19.5% to -8.8%)  |
| 20 | Sri Lanka | Adverse effects of medical treatment            | 0 (0 to 0)      | 0 (0 to 0)       | 0% (0% to 0%)             |
| 21 | Sri Lanka | Conflict and terrorism                          | 214 (86 to 487) | 8 (3 to 18)      | NA                        |
| 22 | Sri Lanka | Cyclist road injuries                           | 13 (9 to 18)    | 13 (9 to 19)     | 3.6% (-5.3% to 13.6%)     |
| 23 | Sri Lanka | Drowning                                        | 0 (0 to 1)      | 1 (0 to 1)       | 25.3% (13.4% to 38.4%)    |
| 24 | Sri Lanka | Environmental heat and cold exposure            | 2 (2 to 3)      | 2 (1 to 3)       | -16.4% (-22.6% to -9.3%)  |
| 25 | Sri Lanka | Executions and police conflict                  | 0 (0 to 0)      | 0 (0 to 0)       | NA                        |
| 26 | Sri Lanka | Exposure to forces of nature                    | 1 (1 to 2)      | 0 (0 to 0)       | NA                        |
| 27 | Sri Lanka | Falls                                           | 86 (69 to 109)  | 130 (104 to 160) | 49.9% (42.8% to 57.2%)    |
| 28 | Sri Lanka | Fire, heat, and hot substances                  | 2 (1 to 3)      | 1 (1 to 3)       | -27% (-32.7% to -21.6%)   |
| 29 | Sri Lanka | Foreign body in eyes                            | 0 (0 to 0)      | 0 (0 to 0)       | -2.2% (-3.5% to -1.3%)    |
| 30 | Sri Lanka | Foreign body in other body part                 | 1 (1 to 2)      | 1 (1 to 2)       | -5.3% (-9.2% to -0.8%)    |
| 31 | Sri Lanka | Motor vehicle road injuries                     | 21 (16 to 28)   | 23 (17 to 30)    | 6.5% (-2.1% to 16.5%)     |
| 32 | Sri Lanka | Motorcyclist road injuries                      | 30 (23 to 38)   | 34 (27 to 43)    | 14.9% (5.4% to 27%)       |
| 33 | Sri Lanka | Non-venomous animal contact                     | 7 (4 to 12)     | 4 (2 to 7)       | -45.8% (-51.2% to -39.8%) |
| 34 | Sri Lanka | Other exposure to mechanical forces             | 25 (15 to 40)   | 19 (11 to 31)    | -23% (-30% to -16.5%)     |
| 35 | Sri Lanka | Other road injuries                             | 1 (1 to 2)      | 1 (1 to 2)       | 2.7% (-6.9% to 12.6%)     |
| 36 | Sri Lanka | Other transport injuries                        | 5 (3 to 7)      | 5 (3 to 7)       | 7.2% (-0.1% to 15.5%)     |
| 37 | Sri Lanka | Other unintentional injuries                    | 18 (12 to 28)   | 10 (6 to 16)     | -44.8% (-51.3% to -37.5%) |
| 38 | Sri Lanka | Pedestrian road injuries                        | 16 (12 to 20)   | 14 (11 to 18)    | -11.3% (-17.7% to -4%)    |
| 39 | Sri Lanka | Physical violence by firearm                    | 0 (0 to 0)      | 0 (0 to 1)       | 34.1% (15.9% to 54.1%)    |
| 40 | Sri Lanka | Physical violence by other means                | 27 (19 to 38)   | 20 (14 to 29)    | -25.9% (-32.6% to -19.7%) |
| 41 | Sri Lanka | Physical violence by sharp object               | 4 (3 to 6)      | 3 (2 to 4)       | -33.5% (-42.2% to -24.9%) |
| 42 | Sri Lanka | Poisoning by carbon monoxide                    | 0 (0 to 0)      | 0 (0 to 0)       | 9.4% (-2.5% to 22.2%)     |
| 43 | Sri Lanka | Poisoning by other means                        | 0 (0 to 0)      | 0 (0 to 0)       | -25.7% (-34.1% to -17%)   |
| 44 | Sri Lanka | Pulmonary aspiration and foreign body in airway | 0 (0 to 0)      | 0 (0 to 0)       | -5.3% (-13.7% to 4.5%)    |
| 45 |           |                                                 |                 |                  |                           |
| 46 |           |                                                 |                 |                  |                           |

|    |           |                                                 |                 |               |                           |
|----|-----------|-------------------------------------------------|-----------------|---------------|---------------------------|
| 1  |           |                                                 |                 |               |                           |
| 2  | Sri Lanka | Self-harm by firearm                            | 0 (0 to 0)      | 0 (0 to 0)    | -37.8% (-54.1% to -19.2%) |
| 3  | Sri Lanka | Self-harm by other specified means              | 8 (5 to 12)     | 4 (3 to 7)    | -44.5% (-48.2% to -40.4%) |
| 4  | Sri Lanka | Unintentional firearm injuries                  | 4 (2 to 6)      | 2 (1 to 4)    | -41% (-50% to -32.8%)     |
| 5  | Sri Lanka | Venomous animal contact                         | 2 (1 to 4)      | 1 (0 to 2)    | -51.1% (-57.5% to -44.4%) |
| 6  | Sudan     | Adverse effects of medical treatment            | 0 (0 to 0)      | 0 (0 to 0)    | 0% (0% to 0%)             |
| 7  | Sudan     | Conflict and terrorism                          | 119 (37 to 307) | 1 (0 to 3)    | NA                        |
| 8  | Sudan     | Cyclist road injuries                           | 7 (4 to 11)     | 7 (5 to 11)   | 4.8% (-2.7% to 13.8%)     |
| 9  | Sudan     | Drowning                                        | 0 (0 to 0)      | 0 (0 to 0)    | -11.6% (-21% to -0.6%)    |
| 10 | Sudan     | Environmental heat and cold exposure            | 0 (0 to 1)      | 1 (0 to 1)    | 2.9% (-3.9% to 10.6%)     |
| 11 | Sudan     | Executions and police conflict                  | 0 (0 to 0)      | 2 (1 to 5)    | NA                        |
| 12 | Sudan     | Exposure to forces of nature                    | 0 (0 to 0)      | 0 (0 to 0)    | NA                        |
| 13 | Sudan     | Falls                                           | 33 (20 to 51)   | 40 (25 to 62) | 21.4% (15.8% to 27%)      |
| 14 | Sudan     | Fire, heat, and hot substances                  | 0 (0 to 0)      | 0 (0 to 0)    | -33% (-37.9% to -28.4%)   |
| 15 | Sudan     | Foreign body in eyes                            | 0 (0 to 0)      | 0 (0 to 0)    | 0.5% (0% to 1.1%)         |
| 16 | Sudan     | Foreign body in other body part                 | 2 (1 to 3)      | 2 (1 to 3)    | -1.5% (-5.7% to 3.1%)     |
| 17 | Sudan     | Motor vehicle road injuries                     | 31 (22 to 42)   | 28 (20 to 38) | -8.9% (-14.8% to -2.7%)   |
| 18 | Sudan     | Motorcyclist road injuries                      | 12 (8 to 16)    | 12 (8 to 16)  | -1.2% (-9.3% to 7.7%)     |
| 19 | Sudan     | Non-venomous animal contact                     | 3 (1 to 5)      | 2 (1 to 5)    | -8.4% (-13.1% to -2.8%)   |
| 20 | Sudan     | Other exposure to mechanical forces             | 39 (20 to 70)   | 34 (18 to 63) | -10.6% (-16.7% to -5.5%)  |
| 21 | Sudan     | Other road injuries                             | 1 (1 to 2)      | 1 (1 to 3)    | 12.2% (3.9% to 23.1%)     |
| 22 | Sudan     | Other transport injuries                        | 2 (2 to 3)      | 2 (2 to 3)    | 1.7% (-4.3% to 7.6%)      |
| 23 | Sudan     | Other unintentional injuries                    | 7 (4 to 12)     | 5 (3 to 9)    | -24.7% (-28.7% to -20.2%) |
| 24 | Sudan     | Pedestrian road injuries                        | 23 (17 to 31)   | 18 (13 to 25) | -21% (-26.5% to -15.1%)   |
| 25 | Sudan     | Physical violence by firearm                    | 0 (0 to 0)      | 0 (0 to 1)    | 169.7% (127.7% to 235.4%) |
| 26 | Sudan     | Physical violence by other means                | 7 (5 to 11)     | 12 (8 to 19)  | 75.9% (55.4% to 100.8%)   |
| 27 | Sudan     | Physical violence by sharp object               | 1 (0 to 2)      | 1 (1 to 3)    | 40.9% (18.9% to 71.6%)    |
| 28 | Sudan     | Poisoning by carbon monoxide                    | 0 (0 to 0)      | 0 (0 to 0)    | 17.2% (2.8% to 33.6%)     |
| 29 | Sudan     | Poisoning by other means                        | 0 (0 to 0)      | 0 (0 to 0)    | -29.4% (-36.6% to -22.1%) |
| 30 | Sudan     | Pulmonary aspiration and foreign body in airway | 0 (0 to 0)      | 0 (0 to 0)    | -30.4% (-39.3% to -21.8%) |
| 31 | Sudan     | Self-harm by firearm                            | 0 (0 to 0)      | 0 (0 to 0)    | 21.9% (12.8% to 31.9%)    |
| 32 | Sudan     | Self-harm by other specified means              | 0 (0 to 0)      | 0 (0 to 0)    | -1.4% (-8% to 5.6%)       |
| 33 | Sudan     | Unintentional firearm injuries                  | 1 (0 to 2)      | 1 (0 to 1)    | -12.3% (-20.6% to -3.4%)  |
| 34 | Sudan     | Venomous animal contact                         | 1 (0 to 2)      | 1 (0 to 2)    | -12.2% (-19.7% to -5.3%)  |
| 35 | Suriname  | Adverse effects of medical treatment            | 0 (0 to 0)      | 0 (0 to 0)    | 0% (0% to 0%)             |
| 36 | Suriname  | Conflict and terrorism                          | 0 (0 to 0)      | 0 (0 to 0)    | NA                        |
| 37 | Suriname  | Cyclist road injuries                           | 36 (26 to 49)   | 30 (21 to 40) | -18.3% (-26.9% to -8.6%)  |
| 38 | Suriname  | Drowning                                        | 0 (0 to 1)      | 0 (0 to 1)    | 6.6% (-3.3% to 18.3%)     |
| 39 | Suriname  | Environmental heat and cold exposure            | 13 (9 to 18)    | 14 (10 to 19) | 5.8% (1.5% to 9.8%)       |
| 40 | Suriname  | Executions and police conflict                  | 0 (0 to 0)      | 0 (0 to 0)    | NA                        |
| 41 | Suriname  | Exposure to forces of nature                    | 0 (0 to 0)      | 0 (0 to 0)    | NA                        |
| 42 | Suriname  | Falls                                           | 43 (34 to 55)   | 63 (49 to 81) | 46% (40.4% to 51.5%)      |
| 43 | Suriname  | Fire, heat, and hot substances                  | 4 (3 to 7)      | 4 (2 to 6)    | -10.7% (-17% to -3.9%)    |
| 44 | Suriname  | Foreign body in eyes                            | 0 (0 to 0)      | 0 (0 to 0)    | -0.5% (-1.1% to -0.1%)    |
| 45 |           |                                                 |                 |               |                           |
| 46 |           |                                                 |                 |               |                           |

|    |          |                                                 |                 |                 |                           |
|----|----------|-------------------------------------------------|-----------------|-----------------|---------------------------|
| 1  |          |                                                 |                 |                 |                           |
| 2  | Suriname | Foreign body in other body part                 | 2 (1 to 3)      | 2 (1 to 3)      | 4.1% (-3.7% to 10.4%)     |
| 3  | Suriname | Motor vehicle road injuries                     | 37 (27 to 47)   | 34 (25 to 43)   | -8.7% (-17.5% to 0.9%)    |
| 4  | Suriname | Motorcyclist road injuries                      | 21 (16 to 27)   | 27 (21 to 35)   | 31.9% (17% to 48.9%)      |
| 5  | Suriname | Non-venomous animal contact                     | 3 (1 to 5)      | 3 (2 to 5)      | 7% (-0.9% to 14.8%)       |
| 6  | Suriname | Other exposure to mechanical forces             | 32 (19 to 52)   | 37 (22 to 61)   | 15.3% (8.2% to 22.7%)     |
| 7  | Suriname | Other road injuries                             | 4 (2 to 6)      | 4 (2 to 6)      | 3% (-8.1% to 15.3%)       |
| 8  | Suriname | Other transport injuries                        | 5 (3 to 6)      | 5 (4 to 7)      | 10.5% (4.1% to 17.1%)     |
| 9  | Suriname | Other unintentional injuries                    | 12 (7 to 19)    | 12 (8 to 20)    | 2.4% (-3% to 7.3%)        |
| 10 | Suriname | Pedestrian road injuries                        | 15 (11 to 19)   | 12 (9 to 15)    | -20.3% (-27.6% to -12.2%) |
| 11 | Suriname | Physical violence by firearm                    | 0 (0 to 1)      | 1 (1 to 1)      | 86.4% (68.5% to 106.7%)   |
| 12 | Suriname | Physical violence by other means                | 11 (8 to 16)    | 12 (9 to 18)    | 13.3% (5.5% to 21.4%)     |
| 13 | Suriname | Physical violence by sharp object               | 3 (2 to 5)      | 3 (2 to 6)      | 12.4% (1.3% to 23.4%)     |
| 14 | Suriname | Poisoning by carbon monoxide                    | 0 (0 to 0)      | 0 (0 to 0)      | 26% (11.1% to 42.4%)      |
| 15 | Suriname | Poisoning by other means                        | 0 (0 to 0)      | 0 (0 to 0)      | -15.2% (-25.3% to -4.7%)  |
| 16 | Suriname | Pulmonary aspiration and foreign body in airway | 1 (0 to 1)      | 0 (0 to 1)      | -24.9% (-33.1% to -14.4%) |
| 17 | Suriname | Self-harm by firearm                            | 1 (0 to 1)      | 1 (0 to 1)      | 13.8% (-1.7% to 30.2%)    |
| 18 | Suriname | Self-harm by other specified means              | 2 (1 to 3)      | 2 (1 to 3)      | 2.9% (-4.5% to 10.9%)     |
| 19 | Suriname | Unintentional firearm injuries                  | 4 (2 to 6)      | 4 (2 to 6)      | 10.9% (0.6% to 21.7%)     |
| 20 | Sweden   | Venomous animal contact                         | 5 (3 to 9)      | 6 (3 to 11)     | 19.4% (11.6% to 30.2%)    |
| 21 | Sweden   | Adverse effects of medical treatment            | 0 (0 to 0)      | 0 (0 to 0)      | 0% (0% to 0%)             |
| 22 | Sweden   | Conflict and terrorism                          | 0 (0 to 0)      | 0 (0 to 0)      | NA                        |
| 23 | Sweden   | Cyclist road injuries                           | 19 (12 to 27)   | 12 (7 to 18)    | -36.8% (-41.6% to -32.1%) |
| 24 | Sweden   | Drowning                                        | 0 (0 to 0)      | 0 (0 to 0)      | -7.5% (-13.4% to -0.8%)   |
| 25 | Sweden   | Environmental heat and cold exposure            | 1 (0 to 1)      | 1 (0 to 1)      | -13.1% (-17.4% to -8.8%)  |
| 26 | Sweden   | Executions and police conflict                  | 0 (0 to 0)      | 0 (0 to 0)      | NA                        |
| 27 | Sweden   | Exposure to forces of nature                    | 0 (0 to 0)      | 0 (0 to 0)      | NA                        |
| 28 | Sweden   | Falls                                           | 117 (75 to 174) | 129 (83 to 194) | 10.5% (7% to 13.8%)       |
| 29 | Sweden   | Fire, heat, and hot substances                  | 1 (0 to 1)      | 0 (0 to 1)      | -22.2% (-26% to -18.1%)   |
| 30 | Sweden   | Foreign body in eyes                            | 0 (0 to 0)      | 0 (0 to 0)      | 0% (-0.5% to 0.8%)        |
| 31 | Sweden   | Foreign body in other body part                 | 2 (1 to 5)      | 2 (1 to 5)      | 0.7% (-2.8% to 4.4%)      |
| 32 | Sweden   | Motor vehicle road injuries                     | 35 (24 to 48)   | 17 (11 to 25)   | -51% (-54.8% to -47.1%)   |
| 33 | Sweden   | Motorcyclist road injuries                      | 12 (8 to 17)    | 9 (6 to 13)     | -19% (-24.6% to -12.6%)   |
| 34 | Sweden   | Non-venomous animal contact                     | 2 (1 to 4)      | 2 (1 to 3)      | -10% (-13.1% to -6.8%)    |
| 35 | Sweden   | Other exposure to mechanical forces             | 90 (45 to 164)  | 77 (38 to 141)  | -14.6% (-19.4% to -10.6%) |
| 36 | Sweden   | Other road injuries                             | 2 (1 to 3)      | 2 (1 to 3)      | -14.9% (-21.3% to -7.7%)  |
| 37 | Sweden   | Other transport injuries                        | 4 (3 to 5)      | 3 (2 to 4)      | -27.6% (-31.7% to -22.5%) |
| 38 | Sweden   | Other unintentional injuries                    | 8 (5 to 15)     | 8 (4 to 15)     | -3% (-6.5% to 0.4%)       |
| 39 | Sweden   | Pedestrian road injuries                        | 8 (5 to 12)     | 6 (4 to 8)      | -29.1% (-35.2% to -22.8%) |
| 40 | Sweden   | Physical violence by firearm                    | 0 (0 to 1)      | 1 (0 to 1)      | 30.1% (19.4% to 41.8%)    |
| 41 | Sweden   | Physical violence by other means                | 19 (12 to 28)   | 20 (13 to 29)   | 4.7% (-0.3% to 9.1%)      |
| 42 | Sweden   | Physical violence by sharp object               | 2 (1 to 4)      | 2 (1 to 4)      | -4% (-11% to 2.6%)        |
| 43 | Sweden   | Poisoning by carbon monoxide                    | 0 (0 to 0)      | 0 (0 to 0)      | 12.9% (4.2% to 22.6%)     |
| 44 | Sweden   | Poisoning by other means                        | 0 (0 to 0)      | 0 (0 to 0)      | -33% (-39.2% to -27.5%)   |
| 45 |          |                                                 |                 |                 |                           |
| 46 |          |                                                 |                 |                 |                           |



|    |                      |                                                 |                  |                  |                           |
|----|----------------------|-------------------------------------------------|------------------|------------------|---------------------------|
| 1  |                      |                                                 |                  |                  |                           |
| 2  | Sweden               | Pulmonary aspiration and foreign body in airway | 0 (0 to 1)       | 0 (0 to 1)       | -15.4% (-21.6% to -8.4%)  |
| 3  | Sweden               | Self-harm by firearm                            | 0 (0 to 0)       | 0 (0 to 0)       | -35% (-40.3% to -30.3%)   |
| 4  | Sweden               | Self-harm by other specified means              | 1 (0 to 1)       | 0 (0 to 1)       | -23.6% (-27.4% to -19.4%) |
| 5  | Sweden               | Unintentional firearm injuries                  | 1 (0 to 1)       | 1 (0 to 1)       | 2.6% (-4.6% to 9.8%)      |
| 6  | Sweden               | Venomous animal contact                         | 0 (0 to 1)       | 0 (0 to 1)       | -9.6% (-14.7% to -4.3%)   |
| 7  | Switzerland          | Adverse effects of medical treatment            | 0 (0 to 0)       | 0 (0 to 0)       | 0% (0% to 0%)             |
| 8  | Switzerland          | Conflict and terrorism                          | 0 (0 to 0)       | 0 (0 to 0)       | NA                        |
| 9  | Switzerland          | Cyclist road injuries                           | 34 (25 to 45)    | 21 (15 to 29)    | -37.5% (-45.7% to -28.3%) |
| 10 | Switzerland          | Drowning                                        | 0 (0 to 0)       | 0 (0 to 0)       | 33.7% (19.5% to 46.7%)    |
| 11 | Switzerland          | Environmental heat and cold exposure            | 2 (1 to 2)       | 2 (1 to 2)       | 1.8% (-2.5% to 7%)        |
| 12 | Switzerland          | Executions and police conflict                  | 0 (0 to 0)       | 0 (0 to 0)       | NA                        |
| 13 | Switzerland          | Exposure to forces of nature                    | 0 (0 to 0)       | 0 (0 to 0)       | NA                        |
| 14 | Switzerland          | Falls                                           | 407 (326 to 517) | 365 (286 to 466) | -10.4% (-15% to -5.9%)    |
| 15 | Switzerland          | Fire, heat, and hot substances                  | 2 (1 to 4)       | 2 (1 to 4)       | 2.6% (-2.8% to 7.6%)      |
| 16 | Switzerland          | Foreign body in eyes                            | 0 (0 to 0)       | 0 (0 to 0)       | 0.5% (0.1% to 1.1%)       |
| 17 | Switzerland          | Foreign body in other body part                 | 1 (1 to 3)       | 1 (1 to 3)       | 5.2% (0% to 10.3%)        |
| 18 | Switzerland          | Motor vehicle road injuries                     | 39 (29 to 50)    | 20 (15 to 26)    | -48.3% (-55.4% to -39.9%) |
| 19 | Switzerland          | Motorcyclist road injuries                      | 21 (16 to 26)    | 11 (8 to 14)     | -48.9% (-57.1% to -39.9%) |
| 20 | Switzerland          | Non-venomous animal contact                     | 3 (2 to 5)       | 3 (2 to 5)       | 3.4% (-1.7% to 8.6%)      |
| 21 | Switzerland          | Other exposure to mechanical forces             | 81 (51 to 127)   | 56 (34 to 89)    | -30.6% (-39.1% to -23.3%) |
| 22 | Switzerland          | Other road injuries                             | 1 (1 to 2)       | 1 (1 to 2)       | -24.5% (-34.5% to -12.3%) |
| 23 | Switzerland          | Other transport injuries                        | 8 (6 to 10)      | 5 (4 to 7)       | -32.6% (-39.1% to -24.2%) |
| 24 | Switzerland          | Other unintentional injuries                    | 36 (25 to 54)    | 21 (13 to 34)    | -42.1% (-49.9% to -34.9%) |
| 25 | Switzerland          | Pedestrian road injuries                        | 12 (9 to 15)     | 7 (5 to 9)       | -45.1% (-53.8% to -35.5%) |
| 26 | Switzerland          | Physical violence by firearm                    | 1 (0 to 1)       | 1 (0 to 1)       | 16.1% (1.5% to 33.2%)     |
| 27 | Switzerland          | Physical violence by other means                | 16 (11 to 23)    | 13 (9 to 19)     | -16.9% (-24.3% to -9.3%)  |
| 28 | Switzerland          | Physical violence by sharp object               | 2 (1 to 3)       | 1 (1 to 2)       | -17.2% (-26.6% to -7.4%)  |
| 29 | Switzerland          | Poisoning by carbon monoxide                    | 0 (0 to 0)       | 0 (0 to 0)       | 16.2% (7% to 25.2%)       |
| 30 | Switzerland          | Poisoning by other means                        | 0 (0 to 0)       | 0 (0 to 0)       | 6.1% (-1% to 13.2%)       |
| 31 | Switzerland          | Pulmonary aspiration and foreign body in airway | 1 (0 to 1)       | 1 (0 to 1)       | 2.8% (-6% to 12.9%)       |
| 32 | Switzerland          | Self-harm by firearm                            | 1 (1 to 2)       | 0 (0 to 1)       | -67.3% (-72.8% to -61.8%) |
| 33 | Switzerland          | Self-harm by other specified means              | 5 (3 to 8)       | 3 (2 to 4)       | -44.3% (-48.2% to -40.2%) |
| 34 | Switzerland          | Unintentional firearm injuries                  | 1 (1 to 2)       | 1 (0 to 2)       | -25% (-36.4% to -14.1%)   |
| 35 | Switzerland          | Venomous animal contact                         | 1 (0 to 2)       | 1 (0 to 2)       | -1.2% (-7.2% to 5.1%)     |
| 36 | Syrian Arab Republic | Adverse effects of medical treatment            | 0 (0 to 0)       | 0 (0 to 0)       | 0% (0% to 0%)             |
| 37 | Syrian Arab Republic | Conflict and terrorism                          | 3 (1 to 6)       | 180 (68 to 394)  | NA                        |
| 38 | Syrian Arab Republic | Cyclist road injuries                           | 14 (10 to 20)    | 13 (9 to 18)     | -7.4% (-14.3% to 0.4%)    |
| 39 | Syrian Arab Republic | Drowning                                        | 0 (0 to 0)       | 0 (0 to 0)       | 102.1% (67.5% to 142.3%)  |
| 40 | Syrian Arab Republic | Environmental heat and cold exposure            | 3 (2 to 4)       | 3 (2 to 4)       | -4.2% (-9.2% to 1.1%)     |
| 41 | Syrian Arab Republic | Executions and police conflict                  | 0 (0 to 0)       | 5 (2 to 11)      | NA                        |
| 42 | Syrian Arab Republic | Exposure to forces of nature                    | 0 (0 to 0)       | 0 (0 to 0)       | NA                        |
| 43 | Syrian Arab Republic | Falls                                           | 70 (53 to 93)    | 102 (76 to 139)  | 46.6% (40% to 53.9%)      |
| 44 | Syrian Arab Republic | Fire, heat, and hot substances                  | 1 (0 to 1)       | 1 (0 to 1)       | -14.2% (-25.2% to -3%)    |
| 45 |                      |                                                 |                  |                  |                           |
| 46 |                      |                                                 |                  |                  |                           |

|    |                            |                                                 |                 |               |                           |
|----|----------------------------|-------------------------------------------------|-----------------|---------------|---------------------------|
| 1  |                            |                                                 |                 |               |                           |
| 2  | Syrian Arab Republic       | Foreign body in eyes                            | 0 (0 to 0)      | 0 (0 to 0)    | -1.8% (-3.5% to -0.8%)    |
| 3  | Syrian Arab Republic       | Foreign body in other body part                 | 1 (1 to 3)      | 1 (1 to 3)    | -4.9% (-9.6% to 0.2%)     |
| 4  | Syrian Arab Republic       | Motor vehicle road injuries                     | 24 (19 to 31)   | 19 (15 to 25) | -21.6% (-27.6% to -15%)   |
| 5  | Syrian Arab Republic       | Motorcyclist road injuries                      | 8 (6 to 11)     | 7 (6 to 10)   | -8.2% (-16.5% to 0.6%)    |
| 6  | Syrian Arab Republic       | Non-venomous animal contact                     | 4 (2 to 8)      | 4 (2 to 8)    | 4.3% (-1.2% to 9%)        |
| 7  | Syrian Arab Republic       | Other exposure to mechanical forces             | 21 (13 to 35)   | 20 (12 to 34) | -4.9% (-14.8% to 3.8%)    |
| 8  | Syrian Arab Republic       | Other road injuries                             | 2 (1 to 3)      | 2 (1 to 3)    | -5.4% (-14.1% to 3.9%)    |
| 9  | Syrian Arab Republic       | Other transport injuries                        | 6 (4 to 8)      | 6 (4 to 8)    | -2.6% (-8.1% to 2.7%)     |
| 10 | Syrian Arab Republic       | Other unintentional injuries                    | 17 (11 to 28)   | 16 (10 to 27) | -6.6% (-15.4% to 2.7%)    |
| 11 | Syrian Arab Republic       | Pedestrian road injuries                        | 19 (15 to 24)   | 14 (11 to 18) | -28.8% (-33.6% to -22.6%) |
| 12 | Syrian Arab Republic       | Physical violence by firearm                    | 0 (0 to 0)      | 1 (0 to 1)    | 167% (134.9% to 203.3%)   |
| 13 | Syrian Arab Republic       | Physical violence by other means                | 10 (7 to 14)    | 11 (8 to 16)  | 9.9% (2% to 17%)          |
| 14 | Syrian Arab Republic       | Physical violence by sharp object               | 2 (1 to 3)      | 2 (1 to 3)    | 0% (-10% to 10.6%)        |
| 15 | Syrian Arab Republic       | Poisoning by carbon monoxide                    | 0 (0 to 0)      | 0 (0 to 0)    | 39.5% (25.3% to 54.9%)    |
| 16 | Syrian Arab Republic       | Poisoning by other means                        | 0 (0 to 0)      | 0 (0 to 0)    | -9.8% (-17.8% to -1%)     |
| 17 | Syrian Arab Republic       | Pulmonary aspiration and foreign body in airway | 0 (0 to 1)      | 0 (0 to 1)    | -21.3% (-30.4% to -12.5%) |
| 18 | Syrian Arab Republic       | Self-harm by firearm                            | 0 (0 to 0)      | 0 (0 to 0)    | 26.5% (13.7% to 41.7%)    |
| 19 | Syrian Arab Republic       | Self-harm by other specified means              | 1 (0 to 1)      | 1 (0 to 1)    | 13.8% (7.2% to 20.5%)     |
| 20 | Syrian Arab Republic       | Unintentional firearm injuries                  | 2 (1 to 3)      | 2 (1 to 3)    | -6% (-19.7% to 8.5%)      |
| 21 | Syrian Arab Republic       | Venomous animal contact                         | 2 (1 to 5)      | 3 (1 to 5)    | 6.1% (-0.8% to 13%)       |
| 22 | Taiwan (Province of China) | Adverse effects of medical treatment            | 0 (0 to 0)      | 0 (0 to 0)    | 0% (0% to 0%)             |
| 23 | Taiwan (Province of China) | Conflict and terrorism                          | 0 (0 to 0)      | 0 (0 to 0)    | NA                        |
| 24 | Taiwan (Province of China) | Cyclist road injuries                           | 12 (8 to 18)    | 17 (12 to 23) | 34.6% (13.4% to 62.6%)    |
| 25 | Taiwan (Province of China) | Drowning                                        | 1 (0 to 1)      | 1 (0 to 1)    | 3.2% (-10.7% to 24.1%)    |
| 26 | Taiwan (Province of China) | Environmental heat and cold exposure            | 2 (2 to 4)      | 3 (2 to 4)    | 5.6% (-0.3% to 12.3%)     |
| 27 | Taiwan (Province of China) | Executions and police conflict                  | 0 (0 to 0)      | 0 (0 to 0)    | NA                        |
| 28 | Taiwan (Province of China) | Exposure to forces of nature                    | 0 (0 to 0)      | 0 (0 to 0)    | NA                        |
| 29 | Taiwan (Province of China) | Falls                                           | 106 (85 to 134) | 69 (56 to 87) | -34.7% (-38% to -31.4%)   |
| 30 | Taiwan (Province of China) | Fire, heat, and hot substances                  | 1 (1 to 2)      | 1 (0 to 1)    | -43.2% (-52.6% to -34.8%) |
| 31 | Taiwan (Province of China) | Foreign body in eyes                            | 0 (0 to 0)      | 0 (0 to 0)    | -1.8% (-3.1% to -0.9%)    |
| 32 | Taiwan (Province of China) | Foreign body in other body part                 | 0 (0 to 1)      | 0 (0 to 1)    | 3.7% (-1.9% to 10.1%)     |
| 33 | Taiwan (Province of China) | Motor vehicle road injuries                     | 49 (39 to 61)   | 15 (11 to 20) | -69.5% (-74.5% to -63.9%) |
| 34 | Taiwan (Province of China) | Motorcyclist road injuries                      | 23 (18 to 30)   | 35 (28 to 42) | 49% (26.1% to 78.5%)      |
| 35 | Taiwan (Province of China) | Non-venomous animal contact                     | 1 (1 to 2)      | 1 (0 to 1)    | -23.6% (-27.7% to -18.7%) |
| 36 | Taiwan (Province of China) | Other exposure to mechanical forces             | 5 (3 to 8)      | 7 (4 to 11)   | 36.2% (25.2% to 47.1%)    |
| 37 | Taiwan (Province of China) | Other road injuries                             | 1 (0 to 1)      | 2 (1 to 3)    | 93.9% (59% to 142.4%)     |
| 38 | Taiwan (Province of China) | Other transport injuries                        | 4 (3 to 5)      | 4 (3 to 6)    | 13.5% (7% to 21.2%)       |
| 39 | Taiwan (Province of China) | Other unintentional injuries                    | 11 (8 to 16)    | 3 (2 to 5)    | -71% (-77.2% to -64.5%)   |
| 40 | Taiwan (Province of China) | Pedestrian road injuries                        | 15 (11 to 19)   | 12 (9 to 15)  | -17.7% (-29.5% to -3.9%)  |
| 41 | Taiwan (Province of China) | Physical violence by firearm                    | 0 (0 to 1)      | 1 (0 to 1)    | 39.3% (22.4% to 57.5%)    |
| 42 | Taiwan (Province of China) | Physical violence by other means                | 21 (15 to 29)   | 16 (12 to 23) | -21.7% (-31.1% to -12.1%) |
| 43 | Taiwan (Province of China) | Physical violence by sharp object               | 4 (3 to 7)      | 2 (1 to 4)    | -51.8% (-61.9% to -40.5%) |
| 44 | Taiwan (Province of China) | Poisoning by carbon monoxide                    | 0 (0 to 0)      | 0 (0 to 0)    | 64.5% (38% to 98.2%)      |
| 45 |                            |                                                 |                 |               |                           |
| 46 |                            |                                                 |                 |               |                           |

|    |                            |                                                 |                  |                 |                           |
|----|----------------------------|-------------------------------------------------|------------------|-----------------|---------------------------|
| 1  |                            |                                                 |                  |                 |                           |
| 2  | Taiwan (Province of China) | Poisoning by other means                        | 0 (0 to 0)       | 0 (0 to 0)      | -42.5% (-56.3% to -28%)   |
| 3  | Taiwan (Province of China) | Pulmonary aspiration and foreign body in airway | 0 (0 to 0)       | 0 (0 to 0)      | -18.4% (-31.5% to -3.3%)  |
| 4  | Taiwan (Province of China) | Self-harm by firearm                            | 1 (0 to 1)       | 1 (0 to 1)      | 37.1% (16% to 60.4%)      |
| 5  | Taiwan (Province of China) | Self-harm by other specified means              | 2 (1 to 3)       | 2 (2 to 4)      | 44.2% (34.5% to 54.2%)    |
| 6  | Taiwan (Province of China) | Unintentional firearm injuries                  | 1 (1 to 1)       | 1 (1 to 2)      | 7.4% (-5.2% to 19.1%)     |
| 7  | Taiwan (Province of China) | Venomous animal contact                         | 0 (0 to 1)       | 0 (0 to 1)      | -25% (-29.9% to -19.5%)   |
| 8  | Tajikistan                 | Adverse effects of medical treatment            | 0 (0 to 0)       | 0 (0 to 0)      | 0% (0% to 0%)             |
| 9  | Tajikistan                 | Conflict and terrorism                          | 0 (0 to 0)       | 0 (0 to 0)      | NA                        |
| 10 | Tajikistan                 | Cyclist road injuries                           | 22 (15 to 31)    | 17 (12 to 24)   | -20.7% (-27% to -13.9%)   |
| 11 | Tajikistan                 | Drowning                                        | 1 (0 to 1)       | 1 (0 to 1)      | -13.8% (-22.6% to -5.3%)  |
| 12 | Tajikistan                 | Environmental heat and cold exposure            | 5 (3 to 7)       | 5 (3 to 7)      | 1.7% (-3.5% to 7.7%)      |
| 13 | Tajikistan                 | Executions and police conflict                  | 0 (0 to 0)       | 0 (0 to 0)      | NA                        |
| 14 | Tajikistan                 | Exposure to forces of nature                    | 6 (4 to 11)      | 0 (0 to 0)      | NA                        |
| 15 | Tajikistan                 | Falls                                           | 145 (111 to 190) | 112 (84 to 149) | -22.5% (-26.7% to -18.1%) |
| 16 | Tajikistan                 | Fire, heat, and hot substances                  | 6 (3 to 9)       | 4 (2 to 6)      | -36.3% (-42.1% to -30.8%) |
| 17 | Tajikistan                 | Foreign body in eyes                            | 0 (0 to 0)       | 0 (0 to 0)      | 1.2% (0.6% to 2.1%)       |
| 18 | Tajikistan                 | Foreign body in other body part                 | 2 (1 to 4)       | 2 (1 to 4)      | 2.2% (-3.7% to 7.7%)      |
| 19 | Tajikistan                 | Motor vehicle road injuries                     | 56 (44 to 72)    | 41 (32 to 52)   | -27.5% (-32.3% to -22.3%) |
| 20 | Tajikistan                 | Motorcyclist road injuries                      | 6 (4 to 8)       | 3 (2 to 4)      | -45.5% (-51.7% to -39.2%) |
| 21 | Tajikistan                 | Non-venomous animal contact                     | 3 (2 to 5)       | 3 (2 to 6)      | 13% (7.1% to 19%)         |
| 22 | Tajikistan                 | Other exposure to mechanical forces             | 49 (30 to 79)    | 51 (31 to 81)   | 3.7% (-1.4% to 8.8%)      |
| 23 | Tajikistan                 | Other road injuries                             | 2 (1 to 3)       | 2 (1 to 3)      | -20.5% (-27.6% to -12.4%) |
| 24 | Tajikistan                 | Other transport injuries                        | 5 (4 to 7)       | 5 (3 to 7)      | -1.6% (-7.2% to 4.4%)     |
| 25 | Tajikistan                 | Other unintentional injuries                    | 22 (14 to 36)    | 21 (13 to 34)   | -7% (-13.4% to -2%)       |
| 26 | Tajikistan                 | Pedestrian road injuries                        | 16 (12 to 21)    | 13 (10 to 18)   | -18.2% (-24.6% to -11%)   |
| 27 | Tajikistan                 | Physical violence by firearm                    | 0 (0 to 0)       | 0 (0 to 0)      | -3.4% (-23.6% to 18.7%)   |
| 28 | Tajikistan                 | Physical violence by other means                | 26 (19 to 36)    | 12 (8 to 17)    | -55.5% (-60.8% to -50.1%) |
| 29 | Tajikistan                 | Physical violence by sharp object               | 3 (2 to 5)       | 2 (1 to 3)      | -49.5% (-57.8% to -39.6%) |
| 30 | Tajikistan                 | Poisoning by carbon monoxide                    | 0 (0 to 0)       | 0 (0 to 0)      | -13.2% (-33% to 6.9%)     |
| 31 | Tajikistan                 | Poisoning by other means                        | 0 (0 to 1)       | 0 (0 to 1)      | -16.3% (-29.1% to -3.9%)  |
| 32 | Tajikistan                 | Pulmonary aspiration and foreign body in airway | 1 (1 to 2)       | 1 (1 to 2)      | -1.4% (-9.8% to 7.4%)     |
| 33 | Tajikistan                 | Self-harm by firearm                            | 0 (0 to 0)       | 0 (0 to 0)      | 0.2% (-14.9% to 17.6%)    |
| 34 | Tajikistan                 | Self-harm by other specified means              | 1 (1 to 2)       | 1 (1 to 2)      | -6.1% (-10.6% to -1.4%)   |
| 35 | Tajikistan                 | Unintentional firearm injuries                  | 1 (0 to 1)       | 1 (0 to 1)      | -6% (-13.5% to 2.1%)      |
| 36 | Tajikistan                 | Venomous animal contact                         | 3 (1 to 5)       | 3 (1 to 6)      | 12.4% (6.5% to 19%)       |
| 37 | Thailand                   | Adverse effects of medical treatment            | 0 (0 to 0)       | 0 (0 to 0)      | 0% (0% to 0%)             |
| 38 | Thailand                   | Conflict and terrorism                          | 0 (0 to 1)       | 1 (0 to 1)      | NA                        |
| 39 | Thailand                   | Cyclist road injuries                           | 16 (11 to 24)    | 13 (8 to 19)    | -22.1% (-30.6% to -11.8%) |
| 40 | Thailand                   | Drowning                                        | 1 (0 to 1)       | 1 (0 to 1)      | 12.4% (1.7% to 24%)       |
| 41 | Thailand                   | Environmental heat and cold exposure            | 2 (1 to 2)       | 2 (1 to 3)      | 3.1% (-1.7% to 8.6%)      |
| 42 | Thailand                   | Executions and police conflict                  | 0 (0 to 0)       | 0 (0 to 0)      | NA                        |
| 43 | Thailand                   | Exposure to forces of nature                    | 0 (0 to 1)       | 0 (0 to 0)      | NA                        |
| 44 | Thailand                   | Falls                                           | 69 (55 to 88)    | 93 (73 to 117)  | 34.3% (28.5% to 40.2%)    |
| 45 |                            |                                                 |                  |                 |                           |
| 46 |                            |                                                 |                  |                 |                           |

|    |             |                                                 |                 |               |                           |
|----|-------------|-------------------------------------------------|-----------------|---------------|---------------------------|
| 1  |             |                                                 |                 |               |                           |
| 2  | Thailand    | Fire, heat, and hot substances                  | 1 (1 to 2)      | 1 (1 to 2)    | -7.9% (-14% to -2.4%)     |
| 3  | Thailand    | Foreign body in eyes                            | 0 (0 to 0)      | 0 (0 to 0)    | 0.2% (0.1% to 0.4%)       |
| 4  | Thailand    | Foreign body in other body part                 | 1 (1 to 2)      | 1 (1 to 2)    | -7.7% (-14.5% to -0.7%)   |
| 5  | Thailand    | Motor vehicle road injuries                     | 34 (25 to 45)   | 25 (19 to 34) | -25% (-32.6% to -16.6%)   |
| 6  | Thailand    | Motorcyclist road injuries                      | 80 (65 to 100)  | 62 (50 to 76) | -22.1% (-29.2% to -13.9%) |
| 7  | Thailand    | Non-venomous animal contact                     | 4 (2 to 7)      | 3 (2 to 5)    | -26.8% (-32.6% to -19.4%) |
| 8  | Thailand    | Other exposure to mechanical forces             | 24 (14 to 39)   | 17 (10 to 28) | -28.5% (-35.2% to -22.9%) |
| 9  | Thailand    | Other road injuries                             | 2 (1 to 3)      | 1 (1 to 2)    | -35.7% (-45.7% to -25.4%) |
| 10 | Thailand    | Other transport injuries                        | 7 (5 to 9)      | 6 (4 to 7)    | -17% (-23.3% to -11%)     |
| 11 | Thailand    | Other unintentional injuries                    | 14 (9 to 23)    | 11 (7 to 18)  | -20.9% (-27.8% to -13.2%) |
| 12 | Thailand    | Pedestrian road injuries                        | 24 (18 to 31)   | 11 (8 to 14)  | -55.3% (-59.6% to -50.4%) |
| 13 | Thailand    | Physical violence by firearm                    | 1 (1 to 2)      | 1 (0 to 1)    | -32.7% (-41.5% to -22.4%) |
| 14 | Thailand    | Physical violence by other means                | 32 (23 to 47)   | 18 (13 to 26) | -43.4% (-47.8% to -38.6%) |
| 15 | Thailand    | Physical violence by sharp object               | 5 (3 to 7)      | 2 (1 to 4)    | -53% (-58.6% to -46.6%)   |
| 16 | Thailand    | Poisoning by carbon monoxide                    | 0 (0 to 0)      | 0 (0 to 0)    | 25.6% (12.9% to 41.3%)    |
| 17 | Thailand    | Poisoning by other means                        | 0 (0 to 0)      | 0 (0 to 0)    | -9% (-16.3% to -1%)       |
| 18 | Thailand    | Pulmonary aspiration and foreign body in airway | 0 (0 to 1)      | 0 (0 to 0)    | -28.5% (-37.3% to -17.2%) |
| 19 | Thailand    | Self-harm by firearm                            | 0 (0 to 1)      | 0 (0 to 1)    | -32.2% (-48.8% to -13.4%) |
| 20 | Thailand    | Self-harm by other specified means              | 3 (2 to 4)      | 2 (1 to 3)    | -23.3% (-28.3% to -17.1%) |
| 21 | Thailand    | Unintentional firearm injuries                  | 3 (2 to 4)      | 2 (1 to 3)    | -24.2% (-33% to -15.4%)   |
| 22 | Thailand    | Venomous animal contact                         | 1 (0 to 3)      | 1 (0 to 2)    | -37.2% (-45.5% to -29.7%) |
| 23 | Timor-Leste | Adverse effects of medical treatment            | 0 (0 to 0)      | 0 (0 to 0)    | 0% (0% to 0%)             |
| 24 | Timor-Leste | Conflict and terrorism                          | 160 (64 to 367) | 0 (0 to 0)    | NA                        |
| 25 | Timor-Leste | Cyclist road injuries                           | 18 (12 to 25)   | 17 (12 to 24) | -3.9% (-12% to 4.8%)      |
| 26 | Timor-Leste | Drowning                                        | 0 (0 to 1)      | 0 (0 to 0)    | -28.6% (-33.6% to -23.7%) |
| 27 | Timor-Leste | Environmental heat and cold exposure            | 1 (1 to 2)      | 1 (1 to 2)    | -0.6% (-5.7% to 4.3%)     |
| 28 | Timor-Leste | Executions and police conflict                  | 0 (0 to 0)      | 0 (0 to 0)    | NA                        |
| 29 | Timor-Leste | Exposure to forces of nature                    | 0 (0 to 0)      | 0 (0 to 0)    | NA                        |
| 30 | Timor-Leste | Falls                                           | 42 (33 to 53)   | 63 (50 to 80) | 50.4% (44.9% to 55.8%)    |
| 31 | Timor-Leste | Fire, heat, and hot substances                  | 2 (1 to 3)      | 1 (1 to 2)    | -24.1% (-30.2% to -18%)   |
| 32 | Timor-Leste | Foreign body in eyes                            | 0 (0 to 0)      | 0 (0 to 0)    | -1% (-1.6% to -0.6%)      |
| 33 | Timor-Leste | Foreign body in other body part                 | 1 (1 to 2)      | 1 (0 to 2)    | -10.5% (-14.6% to -4.8%)  |
| 34 | Timor-Leste | Motor vehicle road injuries                     | 25 (18 to 32)   | 23 (16 to 30) | -7.7% (-15.7% to 0.9%)    |
| 35 | Timor-Leste | Motorcyclist road injuries                      | 21 (16 to 28)   | 34 (26 to 43) | 58.9% (44.2% to 75.7%)    |
| 36 | Timor-Leste | Non-venomous animal contact                     | 6 (4 to 10)     | 4 (2 to 7)    | -30.4% (-35.4% to -24.9%) |
| 37 | Timor-Leste | Other exposure to mechanical forces             | 21 (12 to 33)   | 17 (10 to 29) | -16.5% (-21.7% to -11.5%) |
| 38 | Timor-Leste | Other road injuries                             | 1 (1 to 2)      | 1 (1 to 2)    | 2% (-8.9% to 13.6%)       |
| 39 | Timor-Leste | Other transport injuries                        | 4 (3 to 6)      | 4 (3 to 6)    | 0% (-7.3% to 8.3%)        |
| 40 | Timor-Leste | Other unintentional injuries                    | 12 (8 to 19)    | 9 (6 to 15)   | -21.9% (-27.1% to -16.5%) |
| 41 | Timor-Leste | Pedestrian road injuries                        | 17 (13 to 22)   | 14 (11 to 19) | -16.9% (-23.1% to -9.4%)  |
| 42 | Timor-Leste | Physical violence by firearm                    | 0 (0 to 0)      | 0 (0 to 0)    | 24% (8.7% to 40.2%)       |
| 43 | Timor-Leste | Physical violence by other means                | 17 (12 to 24)   | 16 (11 to 23) | -3.4% (-9.5% to 3%)       |
| 44 | Timor-Leste | Physical violence by sharp object               | 4 (2 to 6)      | 3 (2 to 5)    | -5.9% (-15.5% to 4.2%)    |
| 45 |             |                                                 |                 |               |                           |
| 46 |             |                                                 |                 |               |                           |

|    |             |                                                 |               |               |                           |
|----|-------------|-------------------------------------------------|---------------|---------------|---------------------------|
| 1  |             |                                                 |               |               |                           |
| 2  | Timor-Leste | Poisoning by carbon monoxide                    | 0 (0 to 0)    | 0 (0 to 0)    | 29.1% (13.3% to 45.7%)    |
| 3  | Timor-Leste | Poisoning by other means                        | 0 (0 to 0)    | 0 (0 to 0)    | -13.7% (-19.9% to -6.2%)  |
| 4  | Timor-Leste | Pulmonary aspiration and foreign body in airway | 0 (0 to 0)    | 0 (0 to 0)    | -28.3% (-36.7% to -19.4%) |
| 5  | Timor-Leste | Self-harm by firearm                            | 0 (0 to 0)    | 0 (0 to 0)    | 27.9% (6% to 54.2%)       |
| 6  | Timor-Leste | Self-harm by other specified means              | 1 (1 to 2)    | 1 (1 to 2)    | -7.1% (-12.7% to -0.6%)   |
| 7  | Timor-Leste | Unintentional firearm injuries                  | 2 (1 to 4)    | 2 (1 to 3)    | -13.8% (-21.4% to -4.9%)  |
| 8  | Timor-Leste | Venomous animal contact                         | 2 (1 to 4)    | 1 (0 to 2)    | -37.7% (-45.2% to -30.7%) |
| 9  | Togo        | Adverse effects of medical treatment            | 0 (0 to 0)    | 0 (0 to 0)    | 0% (0% to 0%)             |
| 10 | Togo        | Conflict and terrorism                          | 0 (0 to 0)    | 0 (0 to 0)    | NA                        |
| 11 | Togo        | Cyclist road injuries                           | 30 (19 to 45) | 34 (22 to 50) | 13% (5% to 22.3%)         |
| 12 | Togo        | Drowning                                        | 0 (0 to 0)    | 0 (0 to 0)    | -10.7% (-16.6% to -4%)    |
| 13 | Togo        | Environmental heat and cold exposure            | 0 (0 to 1)    | 0 (0 to 1)    | 4.1% (-1.5% to 9.9%)      |
| 14 | Togo        | Executions and police conflict                  | 0 (0 to 0)    | 0 (0 to 0)    | NA                        |
| 15 | Togo        | Exposure to forces of nature                    | 0 (0 to 0)    | 0 (0 to 0)    | NA                        |
| 16 | Togo        | Falls                                           | 19 (13 to 29) | 21 (14 to 31) | 7.7% (3.7% to 12%)        |
| 17 | Togo        | Fire, heat, and hot substances                  | 0 (0 to 0)    | 0 (0 to 0)    | -6.4% (-12.5% to -1%)     |
| 18 | Togo        | Foreign body in eyes                            | 0 (0 to 0)    | 0 (0 to 0)    | -0.7% (-2% to 0%)         |
| 19 | Togo        | Foreign body in other body part                 | 4 (1 to 8)    | 4 (2 to 8)    | 1.9% (-3.7% to 7.6%)      |
| 20 | Togo        | Motor vehicle road injuries                     | 54 (36 to 76) | 55 (38 to 79) | 3.2% (-4.2% to 11.4%)     |
| 21 | Togo        | Motorcyclist road injuries                      | 27 (19 to 37) | 32 (23 to 44) | 19.7% (10.5% to 29%)      |
| 22 | Togo        | Non-venomous animal contact                     | 3 (1 to 6)    | 3 (1 to 6)    | 3.3% (-1.6% to 8.8%)      |
| 23 | Togo        | Other exposure to mechanical forces             | 25 (12 to 45) | 23 (11 to 42) | -7.8% (-13.9% to -0.6%)   |
| 24 | Togo        | Other road injuries                             | 2 (1 to 5)    | 2 (1 to 5)    | 3.4% (-5.6% to 13.3%)     |
| 25 | Togo        | Other transport injuries                        | 4 (3 to 5)    | 3 (2 to 5)    | -8.7% (-15.5% to -1.9%)   |
| 26 | Togo        | Other unintentional injuries                    | 3 (2 to 5)    | 3 (1 to 4)    | -6.3% (-12.6% to 1.5%)    |
| 27 | Togo        | Pedestrian road injuries                        | 57 (41 to 76) | 52 (37 to 71) | -8.2% (-14.2% to -2.1%)   |
| 28 | Togo        | Physical violence by firearm                    | 0 (0 to 0)    | 0 (0 to 0)    | 34.9% (22.3% to 48.6%)    |
| 29 | Togo        | Physical violence by other means                | 7 (5 to 11)   | 8 (5 to 12)   | 11.9% (5.8% to 18.6%)     |
| 30 | Togo        | Physical violence by sharp object               | 2 (1 to 3)    | 2 (1 to 4)    | 10.5% (2.2% to 19.9%)     |
| 31 | Togo        | Poisoning by carbon monoxide                    | 0 (0 to 0)    | 0 (0 to 0)    | 8.4% (-3.4% to 22.2%)     |
| 32 | Togo        | Poisoning by other means                        | 0 (0 to 0)    | 0 (0 to 0)    | -12.9% (-20.4% to -4.8%)  |
| 33 | Togo        | Pulmonary aspiration and foreign body in airway | 0 (0 to 0)    | 0 (0 to 0)    | -6.1% (-14.8% to 3.7%)    |
| 34 | Togo        | Self-harm by firearm                            | 0 (0 to 0)    | 0 (0 to 0)    | 24% (15.4% to 34.3%)      |
| 35 | Togo        | Self-harm by other specified means              | 0 (0 to 0)    | 0 (0 to 0)    | 13.5% (7% to 20.6%)       |
| 36 | Togo        | Unintentional firearm injuries                  | 1 (0 to 2)    | 1 (0 to 2)    | -10.5% (-18.7% to -1.6%)  |
| 37 | Togo        | Venomous animal contact                         | 0 (0 to 1)    | 0 (0 to 1)    | 1.8% (-5.7% to 9.1%)      |
| 38 | Tokelau     | Adverse effects of medical treatment            | 0 (0 to 0)    | 0 (0 to 0)    | 0% (0% to 0%)             |
| 39 | Tokelau     | Conflict and terrorism                          | 0 (0 to 0)    | 0 (0 to 0)    | NA                        |
| 40 | Tokelau     | Cyclist road injuries                           | 8 (4 to 12)   | 8 (5 to 13)   | 11.1% (3.3% to 19.5%)     |
| 41 | Tokelau     | Drowning                                        | 0 (0 to 0)    | 0 (0 to 0)    | 18.8% (7% to 34%)         |
| 42 | Tokelau     | Environmental heat and cold exposure            | 0 (0 to 0)    | 0 (0 to 0)    | -1.7% (-7.5% to 4.8%)     |
| 43 | Tokelau     | Executions and police conflict                  | 0 (0 to 0)    | 0 (0 to 0)    | NA                        |
| 44 | Tokelau     | Exposure to forces of nature                    | 0 (0 to 0)    | 0 (0 to 0)    | NA                        |
| 45 |             |                                                 |               |               |                           |
| 46 |             |                                                 |               |               |                           |

|    |         |                                                 |               |               |                           |
|----|---------|-------------------------------------------------|---------------|---------------|---------------------------|
| 1  |         |                                                 |               |               |                           |
| 2  | Tokelau | Falls                                           | 21 (13 to 34) | 34 (21 to 52) | 56.3% (50.4% to 62.9%)    |
| 3  | Tokelau | Fire, heat, and hot substances                  | 0 (0 to 0)    | 0 (0 to 0)    | 17.2% (9.7% to 24.6%)     |
| 4  | Tokelau | Foreign body in eyes                            | 0 (0 to 0)    | 0 (0 to 0)    | 2.4% (0.8% to 4.6%)       |
| 5  | Tokelau | Foreign body in other body part                 | 1 (0 to 2)    | 1 (0 to 2)    | -0.1% (-5% to 5.3%)       |
| 6  | Tokelau | Motor vehicle road injuries                     | 28 (20 to 40) | 26 (18 to 37) | -8.3% (-14.8% to -1.5%)   |
| 7  | Tokelau | Motorcyclist road injuries                      | 18 (13 to 26) | 20 (14 to 28) | 7.7% (0.1% to 15.4%)      |
| 8  | Tokelau | Non-venomous animal contact                     | 3 (1 to 6)    | 2 (1 to 5)    | -18.9% (-23.8% to -14.3%) |
| 9  | Tokelau | Other exposure to mechanical forces             | 20 (10 to 38) | 18 (9 to 34)  | -11.4% (-16.6% to -5.7%)  |
| 10 | Tokelau | Other road injuries                             | 2 (1 to 4)    | 2 (1 to 4)    | 12.6% (1.6% to 23.8%)     |
| 11 | Tokelau | Other transport injuries                        | 3 (2 to 5)    | 3 (2 to 4)    | -9.1% (-15.4% to -2.2%)   |
| 12 | Tokelau | Other unintentional injuries                    | 2 (1 to 4)    | 2 (1 to 4)    | -7.6% (-12.5% to -2.4%)   |
| 13 | Tokelau | Pedestrian road injuries                        | 18 (12 to 25) | 16 (11 to 23) | -9.1% (-15.6% to -2.3%)   |
| 14 | Tokelau | Physical violence by firearm                    | 0 (0 to 0)    | 0 (0 to 0)    | 61.5% (40.3% to 83.8%)    |
| 15 | Tokelau | Physical violence by other means                | 30 (20 to 45) | 30 (20 to 46) | 0.3% (-4.8% to 5.4%)      |
| 16 | Tokelau | Physical violence by sharp object               | 2 (1 to 5)    | 2 (1 to 4)    | -12% (-20.4% to -2.7%)    |
| 17 | Tokelau | Poisoning by carbon monoxide                    | 0 (0 to 0)    | 0 (0 to 0)    | 16.3% (4.3% to 30.4%)     |
| 18 | Tokelau | Poisoning by other means                        | 0 (0 to 0)    | 0 (0 to 0)    | -9.4% (-17.2% to -1%)     |
| 19 | Tokelau | Pulmonary aspiration and foreign body in airway | 0 (0 to 0)    | 0 (0 to 0)    | -12.9% (-22.3% to -3.4%)  |
| 20 | Tokelau | Self-harm by firearm                            | 0 (0 to 0)    | 0 (0 to 0)    | 4.5% (-3.2% to 14.8%)     |
| 21 | Tokelau | Self-harm by other specified means              | 0 (0 to 0)    | 0 (0 to 0)    | -10.1% (-15.9% to -2.9%)  |
| 22 | Tokelau | Unintentional firearm injuries                  | 1 (0 to 2)    | 1 (0 to 2)    | -16.9% (-25.9% to -8.3%)  |
| 23 | Tokelau | Venomous animal contact                         | 1 (0 to 2)    | 1 (0 to 2)    | -16.6% (-22.2% to -9.7%)  |
| 24 | Tonga   | Adverse effects of medical treatment            | 0 (0 to 0)    | 0 (0 to 0)    | 0% (0% to 0%)             |
| 25 | Tonga   | Conflict and terrorism                          | 0 (0 to 0)    | 0 (0 to 0)    | NA                        |
| 26 | Tonga   | Cyclist road injuries                           | 9 (6 to 13)   | 11 (7 to 15)  | 12.1% (4.1% to 20.4%)     |
| 27 | Tonga   | Drowning                                        | 0 (0 to 1)    | 0 (0 to 1)    | 22.1% (11.4% to 35.2%)    |
| 28 | Tonga   | Environmental heat and cold exposure            | 2 (1 to 3)    | 2 (1 to 3)    | -1.2% (-6.1% to 5.2%)     |
| 29 | Tonga   | Executions and police conflict                  | 0 (0 to 0)    | 0 (0 to 0)    | NA                        |
| 30 | Tonga   | Exposure to forces of nature                    | 6 (3 to 10)   | 0 (0 to 0)    | NA                        |
| 31 | Tonga   | Falls                                           | 44 (34 to 58) | 61 (47 to 82) | 39.3% (34.4% to 45%)      |
| 32 | Tonga   | Fire, heat, and hot substances                  | 2 (1 to 3)    | 2 (1 to 3)    | -3.3% (-9.3% to 2.7%)     |
| 33 | Tonga   | Foreign body in eyes                            | 0 (0 to 0)    | 0 (0 to 0)    | -0.3% (-0.9% to 0.1%)     |
| 34 | Tonga   | Foreign body in other body part                 | 1 (0 to 1)    | 1 (0 to 1)    | -3.1% (-7.5% to 2.1%)     |
| 35 | Tonga   | Motor vehicle road injuries                     | 21 (16 to 27) | 22 (17 to 28) | 2.7% (-4.8% to 10.8%)     |
| 36 | Tonga   | Motorcyclist road injuries                      | 12 (9 to 16)  | 14 (11 to 18) | 15.2% (6.4% to 24.6%)     |
| 37 | Tonga   | Non-venomous animal contact                     | 5 (3 to 9)    | 4 (2 to 7)    | -14.1% (-18.4% to -9%)    |
| 38 | Tonga   | Other exposure to mechanical forces             | 11 (6 to 18)  | 10 (5 to 17)  | -6.4% (-11.1% to -0.6%)   |
| 39 | Tonga   | Other road injuries                             | 1 (1 to 2)    | 1 (1 to 2)    | 11.9% (1.4% to 22.9%)     |
| 40 | Tonga   | Other transport injuries                        | 7 (5 to 9)    | 6 (4 to 8)    | -11.5% (-16.7% to -5.9%)  |
| 41 | Tonga   | Other unintentional injuries                    | 10 (6 to 15)  | 8 (6 to 13)   | -13.3% (-17.5% to -8.9%)  |
| 42 | Tonga   | Pedestrian road injuries                        | 12 (9 to 15)  | 11 (8 to 14)  | -9.7% (-16.6% to -2.2%)   |
| 43 | Tonga   | Physical violence by firearm                    | 0 (0 to 0)    | 0 (0 to 0)    | -17.3% (-34.4% to 1.3%)   |
| 44 | Tonga   | Physical violence by other means                | 38 (27 to 53) | 19 (13 to 27) | -50.7% (-55% to -46.1%)   |
| 45 |         |                                                 |               |               |                           |
| 46 |         |                                                 |               |               |                           |

|    |                     |                                                 |               |               |                           |
|----|---------------------|-------------------------------------------------|---------------|---------------|---------------------------|
| 1  |                     |                                                 |               |               |                           |
| 2  | Tonga               | Physical violence by sharp object               | 3 (2 to 6)    | 2 (1 to 3)    | -52.5% (-60.5% to -43.8%) |
| 3  | Tonga               | Poisoning by carbon monoxide                    | 0 (0 to 0)    | 0 (0 to 0)    | 10.4% (1.2% to 22.6%)     |
| 4  | Tonga               | Poisoning by other means                        | 0 (0 to 0)    | 0 (0 to 0)    | -15% (-21.1% to -9.3%)    |
| 5  | Tonga               | Pulmonary aspiration and foreign body in airway | 0 (0 to 0)    | 0 (0 to 0)    | -1.4% (-10.7% to 9.3%)    |
| 6  | Tonga               | Self-harm by firearm                            | 0 (0 to 0)    | 0 (0 to 1)    | 29.3% (13.6% to 46.3%)    |
| 7  | Tonga               | Self-harm by other specified means              | 1 (1 to 1)    | 1 (1 to 2)    | 18.5% (10.6% to 27.2%)    |
| 8  | Tonga               | Unintentional firearm injuries                  | 2 (1 to 3)    | 2 (1 to 3)    | -3.3% (-10.5% to 3.8%)    |
| 9  | Trinidad and Tobago | Venomous animal contact                         | 3 (1 to 6)    | 3 (1 to 6)    | -11.8% (-16.6% to -6%)    |
| 10 | Trinidad and Tobago | Adverse effects of medical treatment            | 0 (0 to 0)    | 0 (0 to 0)    | 0% (0% to 0%)             |
| 11 | Trinidad and Tobago | Conflict and terrorism                          | 16 (7 to 36)  | 0 (0 to 0)    | NA                        |
| 12 | Trinidad and Tobago | Cyclist road injuries                           | 29 (21 to 39) | 27 (19 to 37) | -8% (-18.9% to 4.6%)      |
| 13 | Trinidad and Tobago | Drowning                                        | 0 (0 to 1)    | 0 (0 to 1)    | 0% (-12.2% to 13.2%)      |
| 14 | Trinidad and Tobago | Environmental heat and cold exposure            | 12 (8 to 17)  | 12 (9 to 18)  | 6.3% (1.6% to 11.2%)      |
| 15 | Trinidad and Tobago | Executions and police conflict                  | 0 (0 to 0)    | 0 (0 to 0)    | NA                        |
| 16 | Trinidad and Tobago | Exposure to forces of nature                    | 0 (0 to 0)    | 0 (0 to 0)    | NA                        |
| 17 | Trinidad and Tobago | Falls                                           | 56 (44 to 72) | 60 (47 to 79) | 7.2% (1.5% to 12.9%)      |
| 18 | Trinidad and Tobago | Fire, heat, and hot substances                  | 4 (2 to 6)    | 3 (2 to 6)    | -5.9% (-13% to 0.8%)      |
| 19 | Trinidad and Tobago | Foreign body in eyes                            | 0 (0 to 0)    | 0 (0 to 0)    | 0.4% (0.2% to 0.7%)       |
| 20 | Trinidad and Tobago | Foreign body in other body part                 | 1 (1 to 2)    | 1 (1 to 2)    | 1% (-4.9% to 7%)          |
| 21 | Trinidad and Tobago | Motor vehicle road injuries                     | 30 (22 to 39) | 35 (26 to 45) | 16.7% (2.9% to 32.9%)     |
| 22 | Trinidad and Tobago | Motorcyclist road injuries                      | 11 (8 to 15)  | 16 (12 to 22) | 46.2% (27% to 70.4%)      |
| 23 | Trinidad and Tobago | Non-venomous animal contact                     | 3 (1 to 5)    | 2 (1 to 4)    | -17.8% (-22.3% to -12.2%) |
| 24 | Trinidad and Tobago | Other exposure to mechanical forces             | 29 (17 to 48) | 33 (18 to 54) | 12.4% (5.1% to 19.6%)     |
| 25 | Trinidad and Tobago | Other road injuries                             | 4 (2 to 7)    | 4 (2 to 7)    | -4.6% (-17.2% to 9.4%)    |
| 26 | Trinidad and Tobago | Other transport injuries                        | 4 (3 to 5)    | 4 (3 to 5)    | -1.3% (-7.5% to 4.9%)     |
| 27 | Trinidad and Tobago | Other unintentional injuries                    | 12 (8 to 20)  | 12 (7 to 20)  | -3.1% (-9.6% to 3.1%)     |
| 28 | Trinidad and Tobago | Pedestrian road injuries                        | 21 (16 to 27) | 13 (10 to 18) | -35.6% (-43.8% to -26.6%) |
| 29 | Trinidad and Tobago | Physical violence by firearm                    | 1 (1 to 1)    | 5 (3 to 6)    | 398.6% (304.4% to 524.9%) |
| 30 | Trinidad and Tobago | Physical violence by other means                | 11 (8 to 17)  | 19 (13 to 29) | 68.1% (49.2% to 88.7%)    |
| 31 | Trinidad and Tobago | Physical violence by sharp object               | 4 (3 to 6)    | 7 (4 to 11)   | 77.4% (52% to 107.8%)     |
| 32 | Trinidad and Tobago | Poisoning by carbon monoxide                    | 0 (0 to 0)    | 0 (0 to 0)    | 12.4% (-1.6% to 27.3%)    |
| 33 | Trinidad and Tobago | Poisoning by other means                        | 0 (0 to 0)    | 0 (0 to 0)    | 2% (-6.2% to 11.4%)       |
| 34 | Trinidad and Tobago | Pulmonary aspiration and foreign body in airway | 1 (0 to 1)    | 0 (0 to 1)    | -19% (-27.2% to -9.3%)    |
| 35 | Trinidad and Tobago | Self-harm by firearm                            | 0 (0 to 1)    | 0 (0 to 1)    | -4.8% (-18.5% to 12.6%)   |
| 36 | Trinidad and Tobago | Self-harm by other specified means              | 1 (1 to 2)    | 1 (1 to 1)    | -30.6% (-37.3% to -23.2%) |
| 37 | Trinidad and Tobago | Unintentional firearm injuries                  | 4 (2 to 6)    | 4 (2 to 7)    | 18.3% (8.7% to 29.5%)     |
| 38 | Trinidad and Tobago | Venomous animal contact                         | 5 (2 to 8)    | 4 (2 to 7)    | -15.7% (-20% to -10.4%)   |
| 39 | Tunisia             | Adverse effects of medical treatment            | 0 (0 to 0)    | 0 (0 to 0)    | 0% (0% to 0%)             |
| 40 | Tunisia             | Conflict and terrorism                          | 0 (0 to 0)    | 1 (0 to 2)    | NA                        |
| 41 | Tunisia             | Cyclist road injuries                           | 21 (14 to 30) | 20 (14 to 28) | -3.7% (-11.8% to 5.5%)    |
| 42 | Tunisia             | Drowning                                        | 0 (0 to 0)    | 0 (0 to 0)    | 60.5% (35.7% to 86.9%)    |
| 43 | Tunisia             | Environmental heat and cold exposure            | 3 (2 to 4)    | 3 (2 to 4)    | 3% (-1.5% to 8.3%)        |
| 44 | Tunisia             | Executions and police conflict                  | 0 (0 to 0)    | 0 (0 to 0)    | NA                        |
| 45 |                     |                                                 |               |               |                           |
| 46 |                     |                                                 |               |               |                           |

|    |         |                                                 |               |                 |                           |
|----|---------|-------------------------------------------------|---------------|-----------------|---------------------------|
| 1  |         |                                                 |               |                 |                           |
| 2  | Tunisia | Exposure to forces of nature                    | 2 (1 to 3)    | 0 (0 to 0)      | NA                        |
| 3  | Tunisia | Falls                                           | 66 (51 to 86) | 92 (71 to 121)  | 40.1% (34.5% to 46%)      |
| 4  | Tunisia | Fire, heat, and hot substances                  | 1 (0 to 1)    | 1 (0 to 1)      | -15.4% (-23.5% to -7.4%)  |
| 5  | Tunisia | Foreign body in eyes                            | 0 (0 to 0)    | 0 (0 to 0)      | -0.7% (-1.4% to -0.3%)    |
| 6  | Tunisia | Foreign body in other body part                 | 1 (1 to 3)    | 1 (1 to 3)      | -1.1% (-5.3% to 3.8%)     |
| 7  | Tunisia | Motor vehicle road injuries                     | 41 (31 to 52) | 39 (31 to 51)   | -2.9% (-10.9% to 5.7%)    |
| 8  | Tunisia | Motorcyclist road injuries                      | 15 (11 to 19) | 14 (11 to 18)   | -6.1% (-14.8% to 2.7%)    |
| 9  | Tunisia | Non-venomous animal contact                     | 3 (2 to 6)    | 3 (2 to 6)      | -7.6% (-12.4% to -2%)     |
| 10 | Tunisia | Other exposure to mechanical forces             | 44 (28 to 69) | 36 (23 to 56)   | -17.6% (-22.7% to -12.1%) |
| 11 | Tunisia | Other road injuries                             | 2 (1 to 4)    | 2 (1 to 4)      | 4.5% (-6% to 16%)         |
| 12 | Tunisia | Other transport injuries                        | 5 (3 to 6)    | 5 (3 to 6)      | -0.5% (-7.3% to 5.6%)     |
| 13 | Tunisia | Other unintentional injuries                    | 16 (10 to 26) | 15 (10 to 25)   | -4.5% (-10% to 2.1%)      |
| 14 | Tunisia | Pedestrian road injuries                        | 30 (23 to 37) | 24 (18 to 30)   | -19.6% (-26.8% to -12.8%) |
| 15 | Tunisia | Physical violence by firearm                    | 0 (0 to 0)    | 1 (0 to 1)      | 141.5% (115.7% to 172.5%) |
| 16 | Tunisia | Physical violence by other means                | 9 (6 to 13)   | 10 (7 to 14)    | 2.8% (-3.4% to 8.9%)      |
| 17 | Tunisia | Physical violence by sharp object               | 1 (1 to 2)    | 1 (1 to 2)      | 1.8% (-6.8% to 10.5%)     |
| 18 | Tunisia | Poisoning by carbon monoxide                    | 0 (0 to 0)    | 0 (0 to 0)      | 30.1% (14.9% to 45.7%)    |
| 19 | Tunisia | Poisoning by other means                        | 0 (0 to 0)    | 0 (0 to 0)      | -15.3% (-23.7% to -6.7%)  |
| 20 | Tunisia | Pulmonary aspiration and foreign body in airway | 0 (0 to 1)    | 0 (0 to 1)      | -13.4% (-21.3% to -4.8%)  |
| 21 | Tunisia | Self-harm by firearm                            | 0 (0 to 0)    | 0 (0 to 0)      | 34.3% (21% to 47.5%)      |
| 22 | Tunisia | Self-harm by other specified means              | 1 (1 to 1)    | 1 (1 to 2)      | 14.7% (8.6% to 21.3%)     |
| 23 | Tunisia | Unintentional firearm injuries                  | 2 (1 to 2)    | 2 (1 to 2)      | -3.9% (-15.3% to 7.7%)    |
| 24 | Tunisia | Venomous animal contact                         | 2 (1 to 4)    | 2 (1 to 4)      | -5.8% (-11.5% to 0.2%)    |
| 25 | Turkey  | Adverse effects of medical treatment            | 0 (0 to 0)    | 0 (0 to 0)      | 0% (0% to 0%)             |
| 26 | Turkey  | Conflict and terrorism                          | 8 (3 to 19)   | 2 (1 to 5)      | NA                        |
| 27 | Turkey  | Cyclist road injuries                           | 16 (11 to 22) | 14 (10 to 20)   | -9.5% (-17.7% to -1%)     |
| 28 | Turkey  | Drowning                                        | 0 (0 to 0)    | 0 (0 to 1)      | 135.5% (104% to 171.8%)   |
| 29 | Turkey  | Environmental heat and cold exposure            | 3 (2 to 4)    | 3 (2 to 4)      | 3.6% (-2.5% to 10.1%)     |
| 30 | Turkey  | Executions and police conflict                  | 0 (0 to 0)    | 0 (0 to 0)      | NA                        |
| 31 | Turkey  | Exposure to forces of nature                    | 0 (0 to 1)    | 0 (0 to 0)      | NA                        |
| 32 | Turkey  | Falls                                           | 60 (46 to 79) | 120 (95 to 155) | 100.3% (88.8% to 114.5%)  |
| 33 | Turkey  | Fire, heat, and hot substances                  | 1 (0 to 1)    | 1 (0 to 1)      | -1.1% (-6.2% to 4.2%)     |
| 34 | Turkey  | Foreign body in eyes                            | 0 (0 to 0)    | 0 (0 to 0)      | 0.1% (0% to 0.2%)         |
| 35 | Turkey  | Foreign body in other body part                 | 1 (1 to 3)    | 1 (1 to 3)      | -8.2% (-14.7% to -2.8%)   |
| 36 | Turkey  | Motor vehicle road injuries                     | 31 (24 to 40) | 26 (20 to 33)   | -17% (-24.2% to -8.6%)    |
| 37 | Turkey  | Motorcyclist road injuries                      | 10 (7 to 13)  | 11 (8 to 14)    | 9.2% (-1.2% to 20.8%)     |
| 38 | Turkey  | Non-venomous animal contact                     | 4 (2 to 7)    | 3 (2 to 5)      | -17.4% (-22.5% to -12.3%) |
| 39 | Turkey  | Other exposure to mechanical forces             | 27 (16 to 44) | 26 (15 to 42)   | -5.5% (-11.3% to 0.4%)    |
| 40 | Turkey  | Other road injuries                             | 5 (3 to 7)    | 2 (1 to 3)      | -62.7% (-69.5% to -55.9%) |
| 41 | Turkey  | Other transport injuries                        | 6 (4 to 8)    | 5 (4 to 7)      | -12.9% (-18.1% to -7.7%)  |
| 42 | Turkey  | Other unintentional injuries                    | 22 (14 to 35) | 17 (10 to 28)   | -22.2% (-29.3% to -15.3%) |
| 43 | Turkey  | Pedestrian road injuries                        | 15 (11 to 19) | 13 (10 to 16)   | -10.5% (-18.2% to -1.8%)  |
| 44 | Turkey  | Physical violence by firearm                    | 0 (0 to 1)    | 1 (0 to 1)      | 78.4% (50.6% to 107.1%)   |
| 45 |         |                                                 |               |                 |                           |
| 46 |         |                                                 |               |                 |                           |



|    |              |                                                 |                 |                 |                           |
|----|--------------|-------------------------------------------------|-----------------|-----------------|---------------------------|
| 1  |              |                                                 |                 |                 |                           |
| 2  | Turkey       | Physical violence by other means                | 18 (13 to 25)   | 13 (9 to 18)    | -28.9% (-35.4% to -22.7%) |
| 3  | Turkey       | Physical violence by sharp object               | 3 (2 to 4)      | 2 (1 to 3)      | -22.3% (-31.7% to -12.8%) |
| 4  | Turkey       | Poisoning by carbon monoxide                    | 0 (0 to 0)      | 0 (0 to 0)      | 39.1% (23% to 59%)        |
| 5  | Turkey       | Poisoning by other means                        | 0 (0 to 0)      | 0 (0 to 0)      | -17% (-24.1% to -10%)     |
| 6  | Turkey       | Pulmonary aspiration and foreign body in airway | 0 (0 to 1)      | 0 (0 to 1)      | -19.1% (-25.5% to -12.6%) |
| 7  | Turkey       | Self-harm by firearm                            | 0 (0 to 1)      | 0 (0 to 0)      | -20.5% (-28.4% to -11.7%) |
| 8  | Turkey       | Self-harm by other specified means              | 1 (1 to 1)      | 1 (0 to 1)      | -5.4% (-12.1% to 2.2%)    |
| 9  | Turkey       | Unintentional firearm injuries                  | 3 (2 to 4)      | 2 (1 to 4)      | -14.6% (-23.3% to -4.4%)  |
| 10 | Turkmenistan | Venomous animal contact                         | 2 (1 to 4)      | 2 (1 to 4)      | -8.7% (-14.9% to 0.1%)    |
| 11 | Turkmenistan | Adverse effects of medical treatment            | 0 (0 to 0)      | 0 (0 to 0)      | 0% (0% to 0%)             |
| 12 | Turkmenistan | Conflict and terrorism                          | 0 (0 to 0)      | 0 (0 to 0)      | NA                        |
| 13 | Turkmenistan | Cyclist road injuries                           | 20 (14 to 28)   | 17 (11 to 23)   | -17.5% (-26.2% to -7.5%)  |
| 14 | Turkmenistan | Drowning                                        | 1 (0 to 1)      | 1 (0 to 1)      | 2.6% (-9.1% to 14.8%)     |
| 15 | Turkmenistan | Environmental heat and cold exposure            | 5 (3 to 7)      | 7 (5 to 9)      | 37.8% (17.9% to 57.7%)    |
| 16 | Turkmenistan | Executions and police conflict                  | 0 (0 to 0)      | 0 (0 to 0)      | NA                        |
| 17 | Turkmenistan | Exposure to forces of nature                    | 0 (0 to 0)      | 0 (0 to 0)      | NA                        |
| 18 | Turkmenistan | Falls                                           | 102 (78 to 135) | 108 (81 to 147) | 6.1% (0.3% to 11.6%)      |
| 19 | Turkmenistan | Fire, heat, and hot substances                  | 6 (4 to 11)     | 4 (2 to 7)      | -37.2% (-44.2% to -31%)   |
| 20 | Turkmenistan | Foreign body in eyes                            | 0 (0 to 0)      | 0 (0 to 0)      | 2.6% (1.6% to 3.9%)       |
| 21 | Turkmenistan | Foreign body in other body part                 | 2 (1 to 4)      | 2 (1 to 4)      | -8% (-14.8% to -1.2%)     |
| 22 | Turkmenistan | Motor vehicle road injuries                     | 53 (42 to 68)   | 37 (28 to 47)   | -30.8% (-39.2% to -21.8%) |
| 23 | Turkmenistan | Motorcyclist road injuries                      | 6 (5 to 8)      | 5 (4 to 8)      | -13.5% (-27% to 1.3%)     |
| 24 | Turkmenistan | Non-venomous animal contact                     | 2 (1 to 4)      | 2 (1 to 4)      | -11.4% (-16.7% to -5.5%)  |
| 25 | Turkmenistan | Other exposure to mechanical forces             | 49 (30 to 78)   | 65 (40 to 103)  | 31.4% (22.4% to 42.8%)    |
| 26 | Turkmenistan | Other road injuries                             | 2 (1 to 3)      | 2 (1 to 3)      | -17.9% (-28.7% to -4.8%)  |
| 27 | Turkmenistan | Other transport injuries                        | 4 (3 to 6)      | 5 (3 to 6)      | 5.1% (-1.4% to 11.7%)     |
| 28 | Turkmenistan | Other unintentional injuries                    | 21 (13 to 33)   | 22 (14 to 35)   | 3.7% (-2.2% to 10.1%)     |
| 29 | Turkmenistan | Pedestrian road injuries                        | 30 (23 to 37)   | 15 (11 to 19)   | -50.3% (-56.7% to -43.1%) |
| 30 | Turkmenistan | Physical violence by firearm                    | 0 (0 to 0)      | 0 (0 to 0)      | 17.1% (-4.8% to 38.8%)    |
| 31 | Turkmenistan | Physical violence by other means                | 19 (13 to 26)   | 16 (11 to 23)   | -12.4% (-22.9% to -1.3%)  |
| 32 | Turkmenistan | Physical violence by sharp object               | 3 (2 to 5)      | 3 (2 to 4)      | -15.3% (-27.3% to -2%)    |
| 33 | Turkmenistan | Poisoning by carbon monoxide                    | 0 (0 to 0)      | 0 (0 to 0)      | 38.7% (24.8% to 58.5%)    |
| 34 | Turkmenistan | Poisoning by other means                        | 0 (0 to 1)      | 0 (0 to 1)      | 0.1% (-8.7% to 10%)       |
| 35 | Turkmenistan | Pulmonary aspiration and foreign body in airway | 1 (1 to 2)      | 1 (1 to 2)      | -13.2% (-20.2% to -5.5%)  |
| 36 | Turkmenistan | Self-harm by firearm                            | 0 (0 to 0)      | 0 (0 to 0)      | 16.7% (0.9% to 37.3%)     |
| 37 | Turkmenistan | Self-harm by other specified means              | 2 (1 to 3)      | 2 (2 to 4)      | 29.2% (21.3% to 37.7%)    |
| 38 | Turkmenistan | Unintentional firearm injuries                  | 1 (1 to 2)      | 1 (1 to 2)      | 19.8% (7.3% to 34%)       |
| 39 | Turkmenistan | Venomous animal contact                         | 2 (1 to 5)      | 2 (1 to 4)      | -11.8% (-16.5% to -6.2%)  |
| 40 | Tuvalu       | Adverse effects of medical treatment            | 0 (0 to 0)      | 0 (0 to 0)      | 0% (0% to 0%)             |
| 41 | Tuvalu       | Conflict and terrorism                          | 0 (0 to 0)      | 0 (0 to 0)      | NA                        |
| 42 | Tuvalu       | Cyclist road injuries                           | 8 (5 to 12)     | 8 (5 to 13)     | 5.3% (-3.6% to 14.9%)     |
| 43 | Tuvalu       | Drowning                                        | 0 (0 to 0)      | 0 (0 to 0)      | 11.4% (4.1% to 20.3%)     |
| 44 | Tuvalu       | Environmental heat and cold exposure            | 0 (0 to 1)      | 0 (0 to 1)      | -0.9% (-7.7% to 7.1%)     |
| 45 |              |                                                 |                 |                 |                           |
| 46 |              |                                                 |                 |                 |                           |

|    |        |                                                 |               |               |                           |
|----|--------|-------------------------------------------------|---------------|---------------|---------------------------|
| 1  |        |                                                 |               |               |                           |
| 2  | Tuvalu | Executions and police conflict                  | 0 (0 to 0)    | 0 (0 to 0)    | NA                        |
| 3  | Tuvalu | Exposure to forces of nature                    | 0 (0 to 0)    | 0 (0 to 0)    | NA                        |
| 4  | Tuvalu | Falls                                           | 21 (13 to 34) | 32 (20 to 51) | 50.2% (44.6% to 56.5%)    |
| 5  | Tuvalu | Fire, heat, and hot substances                  | 0 (0 to 0)    | 0 (0 to 0)    | 9.4% (1.8% to 18.5%)      |
| 6  | Tuvalu | Foreign body in eyes                            | 0 (0 to 0)    | 0 (0 to 0)    | 4.4% (1.9% to 8.1%)       |
| 7  | Tuvalu | Foreign body in other body part                 | 1 (0 to 2)    | 1 (0 to 1)    | -0.3% (-4.7% to 5.2%)     |
| 8  | Tuvalu | Motor vehicle road injuries                     | 30 (20 to 41) | 27 (18 to 38) | -9.2% (-16.4% to -0.9%)   |
| 9  | Tuvalu | Motorcyclist road injuries                      | 20 (15 to 27) | 22 (16 to 30) | 8.3% (-0.7% to 18%)       |
| 10 | Tuvalu | Non-venomous animal contact                     | 3 (1 to 6)    | 2 (1 to 5)    | -15% (-19.4% to -10.6%)   |
| 11 | Tuvalu | Other exposure to mechanical forces             | 18 (9 to 33)  | 16 (8 to 30)  | -9.6% (-15% to -2.9%)     |
| 12 | Tuvalu | Other road injuries                             | 2 (1 to 3)    | 2 (1 to 4)    | 12.3% (1.4% to 25.2%)     |
| 13 | Tuvalu | Other transport injuries                        | 3 (2 to 5)    | 3 (2 to 4)    | -9.4% (-15.1% to -3.4%)   |
| 14 | Tuvalu | Other unintentional injuries                    | 2 (1 to 3)    | 2 (1 to 3)    | -5.1% (-10.8% to 1.2%)    |
| 15 | Tuvalu | Pedestrian road injuries                        | 20 (14 to 28) | 18 (13 to 25) | -8.8% (-16% to -0.9%)     |
| 16 | Tuvalu | Physical violence by firearm                    | 0 (0 to 0)    | 0 (0 to 0)    | 23.2% (7.6% to 41.9%)     |
| 17 | Tuvalu | Physical violence by other means                | 29 (19 to 44) | 32 (21 to 48) | 11.3% (3.5% to 19.6%)     |
| 18 | Tuvalu | Physical violence by sharp object               | 2 (1 to 4)    | 2 (1 to 4)    | -5.8% (-15.3% to 3.8%)    |
| 19 | Tuvalu | Poisoning by carbon monoxide                    | 0 (0 to 0)    | 0 (0 to 0)    | 14.3% (1% to 29.5%)       |
| 20 | Tuvalu | Poisoning by other means                        | 0 (0 to 0)    | 0 (0 to 0)    | -11.2% (-19.6% to -2.2%)  |
| 21 | Tuvalu | Pulmonary aspiration and foreign body in airway | 0 (0 to 0)    | 0 (0 to 0)    | -19.7% (-29.8% to -8.4%)  |
| 22 | Tuvalu | Self-harm by firearm                            | 0 (0 to 0)    | 0 (0 to 0)    | 12.5% (2.6% to 23.5%)     |
| 23 | Tuvalu | Self-harm by other specified means              | 0 (0 to 1)    | 0 (0 to 0)    | -17.1% (-23.3% to -9.8%)  |
| 24 | Tuvalu | Unintentional firearm injuries                  | 1 (0 to 3)    | 1 (0 to 2)    | -20.9% (-30.5% to -11.2%) |
| 25 | Tuvalu | Venomous animal contact                         | 1 (0 to 2)    | 1 (0 to 2)    | -6.5% (-13.3% to 3.9%)    |
| 26 | Uganda | Adverse effects of medical treatment            | 0 (0 to 0)    | 0 (0 to 0)    | 0% (0% to 0%)             |
| 27 | Uganda | Conflict and terrorism                          | 23 (7 to 58)  | 1 (0 to 2)    | NA                        |
| 28 | Uganda | Cyclist road injuries                           | 41 (28 to 57) | 44 (30 to 62) | 7.3% (-0.3% to 15.7%)     |
| 29 | Uganda | Drowning                                        | 0 (0 to 0)    | 0 (0 to 0)    | -1% (-8.3% to 8.8%)       |
| 30 | Uganda | Environmental heat and cold exposure            | 0 (0 to 1)    | 0 (0 to 1)    | 2.3% (-3.3% to 7.6%)      |
| 31 | Uganda | Executions and police conflict                  | 0 (0 to 0)    | 0 (0 to 0)    | NA                        |
| 32 | Uganda | Exposure to forces of nature                    | 0 (0 to 0)    | 0 (0 to 0)    | NA                        |
| 33 | Uganda | Falls                                           | 23 (14 to 36) | 27 (17 to 42) | 17.2% (13.6% to 21%)      |
| 34 | Uganda | Fire, heat, and hot substances                  | 0 (0 to 1)    | 0 (0 to 1)    | -5.6% (-10% to -1.3%)     |
| 35 | Uganda | Foreign body in eyes                            | 0 (0 to 0)    | 0 (0 to 0)    | -1.1% (-2.5% to -0.2%)    |
| 36 | Uganda | Foreign body in other body part                 | 3 (1 to 7)    | 3 (1 to 7)    | -6.9% (-11.8% to -1.7%)   |
| 37 | Uganda | Motor vehicle road injuries                     | 36 (24 to 50) | 39 (26 to 53) | 7.6% (-1.3% to 17.2%)     |
| 38 | Uganda | Motorcyclist road injuries                      | 19 (13 to 26) | 20 (14 to 28) | 9.7% (1.5% to 18%)        |
| 39 | Uganda | Non-venomous animal contact                     | 5 (2 to 11)   | 5 (2 to 9)    | -14.8% (-18.9% to -10.6%) |
| 40 | Uganda | Other exposure to mechanical forces             | 25 (12 to 46) | 24 (12 to 44) | -4.5% (-10.2% to 2.2%)    |
| 41 | Uganda | Other road injuries                             | 2 (1 to 3)    | 1 (1 to 3)    | -14% (-21.1% to -5.9%)    |
| 42 | Uganda | Other transport injuries                        | 3 (2 to 5)    | 3 (2 to 4)    | -5.1% (-10% to -0.3%)     |
| 43 | Uganda | Other unintentional injuries                    | 2 (1 to 4)    | 2 (1 to 4)    | -1.1% (-8.5% to 5.7%)     |
| 44 | Uganda | Pedestrian road injuries                        | 53 (39 to 70) | 50 (37 to 66) | -5.3% (-11.8% to 0.9%)    |
| 45 |        |                                                 |               |               |                           |
| 46 |        |                                                 |               |               |                           |

|    |                      |                                                 |                  |                  |                           |
|----|----------------------|-------------------------------------------------|------------------|------------------|---------------------------|
| 1  |                      |                                                 |                  |                  |                           |
| 2  | Uganda               | Physical violence by firearm                    | 0 (0 to 0)       | 0 (0 to 0)       | 35.3% (18.9% to 53.6%)    |
| 3  | Uganda               | Physical violence by other means                | 6 (4 to 9)       | 6 (4 to 10)      | 7.4% (1.3% to 14.2%)      |
| 4  | Uganda               | Physical violence by sharp object               | 2 (1 to 3)       | 2 (1 to 3)       | 6.1% (-1.9% to 15%)       |
| 5  | Uganda               | Poisoning by carbon monoxide                    | 0 (0 to 0)       | 0 (0 to 0)       | 13.9% (2% to 26.1%)       |
| 6  | Uganda               | Poisoning by other means                        | 0 (0 to 0)       | 0 (0 to 0)       | -9.6% (-16.7% to -1.8%)   |
| 7  | Uganda               | Pulmonary aspiration and foreign body in airway | 0 (0 to 0)       | 0 (0 to 0)       | -16.5% (-26.1% to -4.6%)  |
| 8  | Uganda               | Self-harm by firearm                            | 0 (0 to 0)       | 0 (0 to 0)       | 10.5% (3.5% to 19.6%)     |
| 9  | Uganda               | Self-harm by other specified means              | 0 (0 to 0)       | 0 (0 to 0)       | 6.6% (0.9% to 13%)        |
| 10 | Uganda               | Unintentional firearm injuries                  | 1 (0 to 2)       | 1 (0 to 2)       | -16.2% (-24% to -8%)      |
| 11 | Ukraine              | Venomous animal contact                         | 1 (0 to 2)       | 1 (0 to 2)       | -14.4% (-22.9% to -7%)    |
| 12 | Ukraine              | Adverse effects of medical treatment            | 0 (0 to 0)       | 0 (0 to 0)       | 0% (0% to 0%)             |
| 13 | Ukraine              | Conflict and terrorism                          | 0 (0 to 0)       | 3 (1 to 6)       | NA                        |
| 14 | Ukraine              | Cyclist road injuries                           | 54 (36 to 76)    | 48 (32 to 68)    | -11.4% (-16.6% to -5.1%)  |
| 15 | Ukraine              | Drowning                                        | 1 (1 to 2)       | 1 (0 to 1)       | -49.5% (-54.1% to -43.9%) |
| 16 | Ukraine              | Environmental heat and cold exposure            | 13 (9 to 18)     | 11 (8 to 16)     | -11% (-19.6% to -2.4%)    |
| 17 | Ukraine              | Executions and police conflict                  | 0 (0 to 0)       | 0 (0 to 0)       | NA                        |
| 18 | Ukraine              | Exposure to forces of nature                    | 0 (0 to 0)       | 0 (0 to 0)       | NA                        |
| 19 | Ukraine              | Falls                                           | 353 (268 to 470) | 279 (212 to 373) | -20.9% (-23.9% to -17.6%) |
| 20 | Ukraine              | Fire, heat, and hot substances                  | 5 (3 to 8)       | 4 (2 to 6)       | -21.1% (-24.8% to -17%)   |
| 21 | Ukraine              | Foreign body in eyes                            | 0 (0 to 0)       | 0 (0 to 0)       | 0.8% (0.4% to 1.3%)       |
| 22 | Ukraine              | Foreign body in other body part                 | 3 (1 to 5)       | 2 (1 to 5)       | -3.1% (-8.8% to 2%)       |
| 23 | Ukraine              | Motor vehicle road injuries                     | 149 (107 to 196) | 134 (96 to 178)  | -9.8% (-14.8% to -4.1%)   |
| 24 | Ukraine              | Motorcyclist road injuries                      | 20 (14 to 28)    | 16 (11 to 23)    | -20% (-26.1% to -13.5%)   |
| 25 | Ukraine              | Non-venomous animal contact                     | 5 (3 to 8)       | 5 (3 to 9)       | 4.9% (0.4% to 9.3%)       |
| 26 | Ukraine              | Other exposure to mechanical forces             | 81 (50 to 129)   | 78 (48 to 125)   | -3.5% (-8.1% to 1.3%)     |
| 27 | Ukraine              | Other road injuries                             | 3 (1 to 5)       | 2 (1 to 4)       | -5.6% (-12.8% to 2%)      |
| 28 | Ukraine              | Other transport injuries                        | 6 (4 to 8)       | 6 (5 to 9)       | 14.1% (5.7% to 25.4%)     |
| 29 | Ukraine              | Other unintentional injuries                    | 26 (16 to 44)    | 26 (16 to 42)    | -2.1% (-6.9% to 2.7%)     |
| 30 | Ukraine              | Pedestrian road injuries                        | 77 (56 to 101)   | 52 (37 to 69)    | -33.2% (-37.5% to -28.3%) |
| 31 | Ukraine              | Physical violence by firearm                    | 0 (0 to 0)       | 0 (0 to 0)       | 8.3% (-3.2% to 20.2%)     |
| 32 | Ukraine              | Physical violence by other means                | 39 (27 to 56)    | 35 (24 to 50)    | -9.8% (-14% to -5.4%)     |
| 33 | Ukraine              | Physical violence by sharp object               | 4 (3 to 7)       | 3 (2 to 6)       | -24% (-30.4% to -17.2%)   |
| 34 | Ukraine              | Poisoning by carbon monoxide                    | 0 (0 to 0)       | 0 (0 to 0)       | -39.2% (-46.2% to -31.8%) |
| 35 | Ukraine              | Poisoning by other means                        | 0 (0 to 1)       | 0 (0 to 0)       | -6.9% (-13.3% to -0.4%)   |
| 36 | Ukraine              | Pulmonary aspiration and foreign body in airway | 1 (1 to 2)       | 1 (1 to 2)       | -7% (-14.4% to 0.8%)      |
| 37 | Ukraine              | Self-harm by firearm                            | 1 (1 to 2)       | 1 (1 to 2)       | 0.3% (-13.8% to 15%)      |
| 38 | Ukraine              | Self-harm by other specified means              | 5 (3 to 8)       | 8 (5 to 12)      | 48.8% (36.6% to 62%)      |
| 39 | Ukraine              | Unintentional firearm injuries                  | 1 (1 to 2)       | 1 (1 to 2)       | -6.2% (-13.2% to 1.3%)    |
| 40 | Ukraine              | Venomous animal contact                         | 4 (2 to 7)       | 4 (2 to 8)       | 6% (0.6% to 11%)          |
| 41 | United Arab Emirates | Adverse effects of medical treatment            | 0 (0 to 0)       | 0 (0 to 0)       | 0% (0% to 0%)             |
| 42 | United Arab Emirates | Conflict and terrorism                          | 0 (0 to 0)       | 0 (0 to 0)       | NA                        |
| 43 | United Arab Emirates | Cyclist road injuries                           | 22 (15 to 31)    | 20 (14 to 28)    | -9.9% (-18.5% to -0.8%)   |
| 44 | United Arab Emirates | Drowning                                        | 0 (0 to 0)       | 0 (0 to 0)       | 36.2% (13.5% to 64.3%)    |
| 45 |                      |                                                 |                  |                  |                           |
| 46 |                      |                                                 |                  |                  |                           |

|    |                      |                                                 |                  |                  |                           |
|----|----------------------|-------------------------------------------------|------------------|------------------|---------------------------|
| 1  |                      |                                                 |                  |                  |                           |
| 2  | United Arab Emirates | Environmental heat and cold exposure            | 4 (3 to 6)       | 4 (3 to 6)       | 1.7% (-3.3% to 7.2%)      |
| 3  | United Arab Emirates | Executions and police conflict                  | 0 (0 to 0)       | 0 (0 to 0)       | NA                        |
| 4  | United Arab Emirates | Exposure to forces of nature                    | 0 (0 to 0)       | 0 (0 to 0)       | NA                        |
| 5  | United Arab Emirates | Falls                                           | 101 (77 to 131)  | 114 (88 to 150)  | 13.5% (9.1% to 18.3%)     |
| 6  | United Arab Emirates | Fire, heat, and hot substances                  | 1 (0 to 1)       | 1 (0 to 1)       | -16.3% (-22.8% to -9.3%)  |
| 7  | United Arab Emirates | Foreign body in eyes                            | 0 (0 to 0)       | 0 (0 to 0)       | 1.7% (0.5% to 3.5%)       |
| 8  | United Arab Emirates | Foreign body in other body part                 | 1 (1 to 3)       | 1 (1 to 3)       | -1% (-7.2% to 4.9%)       |
| 9  | United Arab Emirates | Motor vehicle road injuries                     | 74 (58 to 93)    | 62 (48 to 78)    | -16.3% (-22.6% to -9.9%)  |
| 10 | United Arab Emirates | Motorcyclist road injuries                      | 17 (13 to 23)    | 15 (12 to 20)    | -10.5% (-19.4% to -0.8%)  |
| 11 | United Arab Emirates | Non-venomous animal contact                     | 2 (1 to 4)       | 2 (1 to 4)       | 9.3% (2.7% to 15.5%)      |
| 12 | United Arab Emirates | Other exposure to mechanical forces             | 34 (21 to 54)    | 29 (18 to 46)    | -14.4% (-19.9% to -9%)    |
| 13 | United Arab Emirates | Other road injuries                             | 2 (1 to 4)       | 2 (1 to 4)       | 5% (-6.3% to 19.4%)       |
| 14 | United Arab Emirates | Other transport injuries                        | 5 (4 to 7)       | 6 (4 to 8)       | 5.1% (-1.1% to 11.1%)     |
| 15 | United Arab Emirates | Other unintentional injuries                    | 20 (13 to 33)    | 18 (12 to 29)    | -10.9% (-17.5% to -4.7%)  |
| 16 | United Arab Emirates | Pedestrian road injuries                        | 52 (40 to 65)    | 35 (27 to 45)    | -32.2% (-37.9% to -26.3%) |
| 17 | United Arab Emirates | Physical violence by firearm                    | 0 (0 to 0)       | 1 (0 to 1)       | 110.7% (87.1% to 137.4%)  |
| 18 | United Arab Emirates | Physical violence by other means                | 13 (9 to 19)     | 12 (8 to 16)     | -10.9% (-16.7% to -4.8%)  |
| 19 | United Arab Emirates | Physical violence by sharp object               | 2 (1 to 3)       | 2 (1 to 3)       | -6.6% (-15.9% to 2.8%)    |
| 20 | United Arab Emirates | Poisoning by carbon monoxide                    | 0 (0 to 0)       | 0 (0 to 0)       | 31.2% (19.3% to 46.9%)    |
| 21 | United Arab Emirates | Poisoning by other means                        | 0 (0 to 0)       | 0 (0 to 0)       | -11.1% (-17.7% to -4.1%)  |
| 22 | United Arab Emirates | Pulmonary aspiration and foreign body in airway | 0 (0 to 1)       | 0 (0 to 1)       | -1.9% (-10.7% to 8.1%)    |
| 23 | United Arab Emirates | Self-harm by firearm                            | 0 (0 to 0)       | 0 (0 to 1)       | 3.4% (-7.8% to 16.1%)     |
| 24 | United Arab Emirates | Self-harm by other specified means              | 1 (1 to 2)       | 1 (1 to 2)       | 3.8% (-2.8% to 10.8%)     |
| 25 | United Arab Emirates | Unintentional firearm injuries                  | 2 (1 to 3)       | 2 (1 to 3)       | -5% (-13.8% to 4.9%)      |
| 26 | United Arab Emirates | Venomous animal contact                         | 1 (0 to 2)       | 1 (0 to 3)       | 7.9% (-0.4% to 14.9%)     |
| 27 | United Kingdom       | Adverse effects of medical treatment            | 0 (0 to 0)       | 0 (0 to 0)       | 0% (0% to 0%)             |
| 28 | United Kingdom       | Conflict and terrorism                          | 1 (0 to 3)       | 0 (0 to 0)       | NA                        |
| 29 | United Kingdom       | Cyclist road injuries                           | 21 (15 to 30)    | 16 (11 to 22)    | -26.8% (-30.2% to -23.4%) |
| 30 | United Kingdom       | Drowning                                        | 0 (0 to 0)       | 0 (0 to 0)       | -0.9% (-4.2% to 2.2%)     |
| 31 | United Kingdom       | Environmental heat and cold exposure            | 4 (2 to 6)       | 3 (2 to 5)       | -25.9% (-31.3% to -21.8%) |
| 32 | United Kingdom       | Executions and police conflict                  | 0 (0 to 0)       | 0 (0 to 0)       | NA                        |
| 33 | United Kingdom       | Exposure to forces of nature                    | 0 (0 to 0)       | 0 (0 to 0)       | NA                        |
| 34 | United Kingdom       | Falls                                           | 181 (139 to 239) | 218 (168 to 286) | 20.9% (18.2% to 23.8%)    |
| 35 | United Kingdom       | Fire, heat, and hot substances                  | 2 (1 to 4)       | 2 (1 to 3)       | -23.6% (-28.5% to -20%)   |
| 36 | United Kingdom       | Foreign body in eyes                            | 0 (0 to 0)       | 0 (0 to 0)       | 1.8% (1.3% to 2.6%)       |
| 37 | United Kingdom       | Foreign body in other body part                 | 2 (1 to 4)       | 2 (1 to 4)       | -0.1% (-1.1% to 0.8%)     |
| 38 | United Kingdom       | Motor vehicle road injuries                     | 26 (18 to 34)    | 15 (11 to 21)    | -39.6% (-42.5% to -36.8%) |
| 39 | United Kingdom       | Motorcyclist road injuries                      | 11 (8 to 15)     | 7 (5 to 9)       | -36.7% (-40% to -33.4%)   |
| 40 | United Kingdom       | Non-venomous animal contact                     | 3 (1 to 5)       | 2 (1 to 4)       | -7.8% (-8.5% to -6.9%)    |
| 41 | United Kingdom       | Other exposure to mechanical forces             | 49 (28 to 80)    | 46 (27 to 75)    | -6.4% (-10.8% to -2.9%)   |
| 42 | United Kingdom       | Other road injuries                             | 1 (1 to 2)       | 1 (1 to 2)       | -18.8% (-23.1% to -14.5%) |
| 43 | United Kingdom       | Other transport injuries                        | 4 (3 to 6)       | 4 (3 to 6)       | -6.4% (-8.9% to -4.1%)    |
| 44 | United Kingdom       | Other unintentional injuries                    | 31 (19 to 51)    | 23 (14 to 37)    | -26.9% (-31.4% to -22.3%) |
| 45 |                      |                                                 |                  |                  |                           |
| 46 |                      |                                                 |                  |                  |                           |

|    |                             |                                                 |               |               |                           |
|----|-----------------------------|-------------------------------------------------|---------------|---------------|---------------------------|
| 1  |                             |                                                 |               |               |                           |
| 2  | United Kingdom              | Pedestrian road injuries                        | 10 (7 to 13)  | 5 (3 to 7)    | -50% (-54.1% to -46.3%)   |
| 3  | United Kingdom              | Physical violence by firearm                    | 0 (0 to 1)    | 1 (0 to 1)    | 45.9% (36.3% to 56.7%)    |
| 4  | United Kingdom              | Physical violence by other means                | 15 (10 to 22) | 13 (8 to 19)  | -16.1% (-20.6% to -12.1%) |
| 5  | United Kingdom              | Physical violence by sharp object               | 1 (1 to 2)    | 1 (1 to 2)    | -2.6% (-9.3% to 3.7%)     |
| 6  | United Kingdom              | Poisoning by carbon monoxide                    | 0 (0 to 0)    | 0 (0 to 0)    | 3.5% (-2.4% to 9.6%)      |
| 7  | United Kingdom              | Poisoning by other means                        | 0 (0 to 1)    | 0 (0 to 0)    | -26.5% (-30.7% to -23%)   |
| 8  | United Kingdom              | Pulmonary aspiration and foreign body in airway | 1 (0 to 1)    | 1 (0 to 1)    | -15.5% (-18.6% to -12.5%) |
| 9  | United Kingdom              | Self-harm by firearm                            | 0 (0 to 0)    | 0 (0 to 0)    | 2.4% (-3.1% to 8.2%)      |
| 10 | United Kingdom              | Self-harm by other specified means              | 3 (2 to 4)    | 2 (1 to 3)    | -24.1% (-27.2% to -21%)   |
| 11 | United Kingdom              | Unintentional firearm injuries                  | 1 (1 to 2)    | 1 (1 to 2)    | 2.3% (-1.7% to 5.8%)      |
| 12 | United Kingdom              | Venomous animal contact                         | 1 (0 to 3)    | 1 (0 to 2)    | -9.7% (-10.7% to -8.8%)   |
| 13 | United Republic of Tanzania | Adverse effects of medical treatment            | 0 (0 to 0)    | 0 (0 to 0)    | 0% (0% to 0%)             |
| 14 | United Republic of Tanzania | Conflict and terrorism                          | 0 (0 to 0)    | 0 (0 to 0)    | NA                        |
| 15 | United Republic of Tanzania | Cyclist road injuries                           | 36 (24 to 53) | 35 (23 to 50) | -3.8% (-10.2% to 4%)      |
| 16 | United Republic of Tanzania | Drowning                                        | 0 (0 to 0)    | 0 (0 to 0)    | -1% (-8.8% to 6.9%)       |
| 17 | United Republic of Tanzania | Environmental heat and cold exposure            | 0 (0 to 1)    | 0 (0 to 1)    | 0.5% (-5.2% to 6.1%)      |
| 18 | United Republic of Tanzania | Executions and police conflict                  | 0 (0 to 0)    | 0 (0 to 0)    | NA                        |
| 19 | United Republic of Tanzania | Exposure to forces of nature                    | 3 (2 to 6)    | 0 (0 to 0)    | NA                        |
| 20 | United Republic of Tanzania | Falls                                           | 25 (15 to 38) | 29 (18 to 44) | 16.1% (12.1% to 20.2%)    |
| 21 | United Republic of Tanzania | Fire, heat, and hot substances                  | 0 (0 to 1)    | 0 (0 to 1)    | -5.5% (-10% to -1.1%)     |
| 22 | United Republic of Tanzania | Foreign body in eyes                            | 0 (0 to 0)    | 0 (0 to 0)    | -0.1% (-0.3% to 0%)       |
| 23 | United Republic of Tanzania | Foreign body in other body part                 | 3 (1 to 8)    | 3 (1 to 7)    | -3.2% (-8% to 1%)         |
| 24 | United Republic of Tanzania | Motor vehicle road injuries                     | 35 (24 to 50) | 34 (23 to 48) | -2.1% (-10.5% to 6.2%)    |
| 25 | United Republic of Tanzania | Motorcyclist road injuries                      | 19 (13 to 27) | 17 (11 to 24) | -11.9% (-18.6% to -5%)    |
| 26 | United Republic of Tanzania | Non-venomous animal contact                     | 5 (2 to 11)   | 5 (2 to 9)    | -14.6% (-18.8% to -10.1%) |
| 27 | United Republic of Tanzania | Other exposure to mechanical forces             | 26 (13 to 48) | 26 (13 to 48) | -1.3% (-6.8% to 4.1%)     |
| 28 | United Republic of Tanzania | Other road injuries                             | 2 (1 to 4)    | 2 (1 to 4)    | -3% (-11.4% to 5.6%)      |
| 29 | United Republic of Tanzania | Other transport injuries                        | 3 (2 to 4)    | 3 (2 to 4)    | 0.1% (-4.7% to 5.4%)      |
| 30 | United Republic of Tanzania | Other unintentional injuries                    | 2 (1 to 4)    | 2 (1 to 4)    | -6.7% (-13% to -0.9%)     |
| 31 | United Republic of Tanzania | Pedestrian road injuries                        | 53 (39 to 70) | 49 (36 to 65) | -7.1% (-13% to -0.7%)     |
| 32 | United Republic of Tanzania | Physical violence by firearm                    | 0 (0 to 0)    | 0 (0 to 0)    | 32.8% (17.7% to 49%)      |
| 33 | United Republic of Tanzania | Physical violence by other means                | 7 (5 to 11)   | 7 (5 to 11)   | 2.3% (-3.9% to 8%)        |
| 34 | United Republic of Tanzania | Physical violence by sharp object               | 2 (1 to 4)    | 2 (1 to 4)    | 0.2% (-7.9% to 7.7%)      |
| 35 | United Republic of Tanzania | Poisoning by carbon monoxide                    | 0 (0 to 0)    | 0 (0 to 0)    | 11.4% (0.7% to 23.6%)     |
| 36 | United Republic of Tanzania | Poisoning by other means                        | 0 (0 to 0)    | 0 (0 to 0)    | -11% (-18.4% to -3.8%)    |
| 37 | United Republic of Tanzania | Pulmonary aspiration and foreign body in airway | 0 (0 to 0)    | 0 (0 to 0)    | -16.7% (-26.3% to -6.9%)  |
| 38 | United Republic of Tanzania | Self-harm by firearm                            | 0 (0 to 0)    | 0 (0 to 0)    | 2.6% (-4.3% to 10.9%)     |
| 39 | United Republic of Tanzania | Self-harm by other specified means              | 0 (0 to 0)    | 0 (0 to 0)    | -10.2% (-15.3% to -5.2%)  |
| 40 | United Republic of Tanzania | Unintentional firearm injuries                  | 1 (0 to 2)    | 1 (0 to 2)    | -9.2% (-16.6% to -1.2%)   |
| 41 | United Republic of Tanzania | Venomous animal contact                         | 1 (0 to 2)    | 1 (0 to 2)    | -11.1% (-17.6% to -3.9%)  |
| 42 | United States of America    | Adverse effects of medical treatment            | 0 (0 to 0)    | 0 (0 to 0)    | 0% (0% to 0%)             |
| 43 | United States of America    | Conflict and terrorism                          | 0 (0 to 0)    | 0 (0 to 0)    | NA                        |
| 44 | United States of America    | Cyclist road injuries                           | 11 (6 to 17)  | 9 (6 to 14)   | -14.3% (-24.4% to -3.2%)  |
| 45 |                             |                                                 |               |               |                           |
| 46 |                             |                                                 |               |               |                           |

|    |                              |                                                 |                 |                |                           |
|----|------------------------------|-------------------------------------------------|-----------------|----------------|---------------------------|
| 1  |                              |                                                 |                 |                |                           |
| 2  | United States of America     | Drowning                                        | 0 (0 to 0)      | 0 (0 to 0)     | -2.6% (-5.8% to 0.3%)     |
| 3  | United States of America     | Environmental heat and cold exposure            | 1 (0 to 1)      | 0 (0 to 1)     | -2.7% (-6% to 0.5%)       |
| 4  | United States of America     | Executions and police conflict                  | 0 (0 to 0)      | 0 (0 to 0)     | NA                        |
| 5  | United States of America     | Exposure to forces of nature                    | 0 (0 to 0)      | 0 (0 to 0)     | NA                        |
| 6  | United States of America     | Falls                                           | 89 (56 to 133)  | 90 (59 to 132) | 1.6% (-3.6% to 7.9%)      |
| 7  | United States of America     | Fire, heat, and hot substances                  | 1 (0 to 1)      | 0 (0 to 1)     | -30.1% (-33.7% to -26.8%) |
| 8  | United States of America     | Foreign body in eyes                            | 0 (0 to 0)      | 0 (0 to 0)     | -4.9% (-8.3% to -2%)      |
| 9  | United States of America     | Foreign body in other body part                 | 2 (1 to 5)      | 3 (1 to 6)     | 14.1% (9.5% to 20.3%)     |
| 10 | United States of America     | Motor vehicle road injuries                     | 81 (57 to 110)  | 65 (46 to 88)  | -19.5% (-23.5% to -15.8%) |
| 11 | United States of America     | Motorcyclist road injuries                      | 15 (10 to 22)   | 17 (11 to 24)  | 12.7% (3.3% to 23.5%)     |
| 12 | United States of America     | Non-venomous animal contact                     | 4 (2 to 7)      | 4 (2 to 8)     | 10.7% (7.7% to 14.3%)     |
| 13 | United States of America     | Other exposure to mechanical forces             | 102 (51 to 188) | 68 (34 to 128) | -33% (-36% to -30.5%)     |
| 14 | United States of America     | Other road injuries                             | 2 (1 to 4)      | 2 (1 to 3)     | -7% (-12.3% to -2%)       |
| 15 | United States of America     | Other transport injuries                        | 13 (9 to 18)    | 9 (6 to 13)    | -31.2% (-33% to -29.1%)   |
| 16 | United States of America     | Other unintentional injuries                    | 10 (6 to 17)    | 11 (6 to 19)   | 11.8% (6.2% to 16.8%)     |
| 17 | United States of America     | Pedestrian road injuries                        | 12 (8 to 18)    | 10 (7 to 15)   | -17.5% (-23.5% to -11.6%) |
| 18 | United States of America     | Physical violence by firearm                    | 4 (2 to 6)      | 4 (2 to 6)     | 1.2% (-6.6% to 9.7%)      |
| 19 | United States of America     | Physical violence by other means                | 34 (21 to 54)   | 28 (17 to 44)  | -18.2% (-21% to -15%)     |
| 20 | United States of America     | Physical violence by sharp object               | 6 (3 to 11)     | 4 (2 to 8)     | -31.2% (-35.4% to -27.3%) |
| 21 | United States of America     | Poisoning by carbon monoxide                    | 0 (0 to 0)      | 0 (0 to 0)     | -2.3% (-6.9% to 1.9%)     |
| 22 | United States of America     | Poisoning by other means                        | 0 (0 to 0)      | 0 (0 to 0)     | -19.9% (-23% to -16.9%)   |
| 23 | United States of America     | Pulmonary aspiration and foreign body in airway | 0 (0 to 0)      | 0 (0 to 0)     | 8.8% (4.7% to 13.6%)      |
| 24 | United States of America     | Self-harm by firearm                            | 0 (0 to 0)      | 0 (0 to 0)     | -3.9% (-10.3% to 2.4%)    |
| 25 | United States of America     | Self-harm by other specified means              | 1 (0 to 1)      | 1 (0 to 1)     | 14.1% (11.1% to 17.8%)    |
| 26 | United States of America     | Unintentional firearm injuries                  | 2 (1 to 4)      | 1 (0 to 2)     | -48.7% (-54.7% to -43.6%) |
| 27 | United States of America     | Venomous animal contact                         | 1 (0 to 2)      | 1 (0 to 2)     | -1.1% (-7% to 2.6%)       |
| 28 | United States Virgin Islands | Adverse effects of medical treatment            | 0 (0 to 0)      | 0 (0 to 0)     | 0% (0% to 0%)             |
| 29 | United States Virgin Islands | Conflict and terrorism                          | 0 (0 to 0)      | 0 (0 to 0)     | NA                        |
| 30 | United States Virgin Islands | Cyclist road injuries                           | 22 (14 to 34)   | 16 (10 to 23)  | -30.5% (-38.3% to -22.2%) |
| 31 | United States Virgin Islands | Drowning                                        | 0 (0 to 0)      | 0 (0 to 0)     | 23.1% (13.3% to 34.3%)    |
| 32 | United States Virgin Islands | Environmental heat and cold exposure            | 2 (1 to 3)      | 2 (1 to 3)     | -3.5% (-8.4% to 1.1%)     |
| 33 | United States Virgin Islands | Executions and police conflict                  | 0 (0 to 0)      | 0 (0 to 0)     | NA                        |
| 34 | United States Virgin Islands | Exposure to forces of nature                    | 0 (0 to 0)      | 0 (0 to 0)     | NA                        |
| 35 | United States Virgin Islands | Falls                                           | 26 (17 to 39)   | 36 (23 to 53)  | 38.3% (32.4% to 43.7%)    |
| 36 | United States Virgin Islands | Fire, heat, and hot substances                  | 1 (0 to 1)      | 1 (0 to 1)     | 1% (-4.9% to 6.6%)        |
| 37 | United States Virgin Islands | Foreign body in eyes                            | 0 (0 to 0)      | 0 (0 to 0)     | -0.1% (-0.4% to 0%)       |
| 38 | United States Virgin Islands | Foreign body in other body part                 | 1 (1 to 3)      | 1 (1 to 3)     | -1.3% (-7.4% to 5.2%)     |
| 39 | United States Virgin Islands | Motor vehicle road injuries                     | 40 (27 to 56)   | 27 (18 to 39)  | -32.2% (-39.1% to -24.9%) |
| 40 | United States Virgin Islands | Motorcyclist road injuries                      | 25 (18 to 35)   | 26 (19 to 35)  | 5.4% (-5.2% to 18.4%)     |
| 41 | United States Virgin Islands | Non-venomous animal contact                     | 2 (1 to 4)      | 2 (1 to 3)     | -17.9% (-21.7% to -13.2%) |
| 42 | United States Virgin Islands | Other exposure to mechanical forces             | 60 (30 to 107)  | 69 (35 to 125) | 16.1% (10% to 23.4%)      |
| 43 | United States Virgin Islands | Other road injuries                             | 6 (3 to 11)     | 4 (2 to 8)     | -21% (-29.5% to -10.6%)   |
| 44 | United States Virgin Islands | Other transport injuries                        | 4 (3 to 5)      | 3 (2 to 5)     | -6.7% (-13.4% to 0.6%)    |
| 45 |                              |                                                 |                 |                |                           |
| 46 |                              |                                                 |                 |                |                           |

|    |                              |                                                 |                  |                  |                           |
|----|------------------------------|-------------------------------------------------|------------------|------------------|---------------------------|
| 1  |                              |                                                 |                  |                  |                           |
| 2  | United States Virgin Islands | Other unintentional injuries                    | 5 (3 to 9)       | 4 (2 to 8)       | -4.4% (-9.7% to 1.1%)     |
| 3  | United States Virgin Islands | Pedestrian road injuries                        | 30 (22 to 41)    | 18 (13 to 25)    | -39.4% (-45.3% to -33%)   |
| 4  | United States Virgin Islands | Physical violence by firearm                    | 5 (3 to 7)       | 6 (4 to 10)      | 38% (14.2% to 66.3%)      |
| 5  | United States Virgin Islands | Physical violence by other means                | 21 (13 to 33)    | 18 (11 to 29)    | -14% (-22.1% to -5.2%)    |
| 6  | United States Virgin Islands | Physical violence by sharp object               | 8 (4 to 14)      | 6 (3 to 11)      | -24.5% (-35.3% to -14.4%) |
| 7  | United States Virgin Islands | Poisoning by carbon monoxide                    | 0 (0 to 0)       | 0 (0 to 0)       | 7.4% (-2.2% to 18.8%)     |
| 8  | United States Virgin Islands | Poisoning by other means                        | 0 (0 to 0)       | 0 (0 to 0)       | -5.5% (-13.5% to 2.2%)    |
| 9  | United States Virgin Islands | Pulmonary aspiration and foreign body in airway | 0 (0 to 0)       | 0 (0 to 0)       | -14.4% (-24.6% to -3.2%)  |
| 10 | United States Virgin Islands | Self-harm by firearm                            | 0 (0 to 0)       | 0 (0 to 0)       | -6.3% (-13% to 1.4%)      |
| 11 | United States Virgin Islands | Self-harm by other specified means              | 0 (0 to 0)       | 0 (0 to 0)       | -29.5% (-36.6% to -21.1%) |
| 12 | United States Virgin Islands | Unintentional firearm injuries                  | 2 (1 to 5)       | 3 (1 to 6)       | 15.7% (6.8% to 25%)       |
| 13 | Uruguay                      | Venomous animal contact                         | 1 (0 to 3)       | 1 (0 to 3)       | -18.5% (-22.5% to -14%)   |
| 14 | Uruguay                      | Adverse effects of medical treatment            | 0 (0 to 0)       | 0 (0 to 0)       | 0% (0% to 0%)             |
| 15 | Uruguay                      | Conflict and terrorism                          | 0 (0 to 0)       | 0 (0 to 0)       | NA                        |
| 16 | Uruguay                      | Cyclist road injuries                           | 23 (16 to 31)    | 24 (17 to 33)    | 6.5% (-4.1% to 20.6%)     |
| 17 | Uruguay                      | Drowning                                        | 0 (0 to 0)       | 0 (0 to 0)       | 4% (-8% to 18%)           |
| 18 | Uruguay                      | Environmental heat and cold exposure            | 2 (1 to 2)       | 2 (1 to 3)       | 8.5% (4% to 13.7%)        |
| 19 | Uruguay                      | Executions and police conflict                  | 0 (0 to 0)       | 0 (0 to 0)       | NA                        |
| 20 | Uruguay                      | Exposure to forces of nature                    | 0 (0 to 0)       | 0 (0 to 0)       | NA                        |
| 21 | Uruguay                      | Falls                                           | 134 (103 to 173) | 150 (114 to 196) | 11.6% (7.7% to 15.4%)     |
| 22 | Uruguay                      | Fire, heat, and hot substances                  | 3 (2 to 5)       | 4 (2 to 6)       | 8.4% (3.1% to 13.8%)      |
| 23 | Uruguay                      | Foreign body in eyes                            | 0 (0 to 0)       | 0 (0 to 0)       | -0.1% (-0.2% to 0%)       |
| 24 | Uruguay                      | Foreign body in other body part                 | 2 (1 to 5)       | 2 (1 to 5)       | 0.1% (-4.6% to 5.8%)      |
| 25 | Uruguay                      | Motor vehicle road injuries                     | 39 (30 to 50)    | 40 (31 to 52)    | 2.4% (-7.6% to 13.4%)     |
| 26 | Uruguay                      | Motorcyclist road injuries                      | 11 (8 to 14)     | 19 (14 to 25)    | 79.7% (58.1% to 107.6%)   |
| 27 | Uruguay                      | Non-venomous animal contact                     | 5 (3 to 9)       | 4 (2 to 8)       | -11.5% (-15.5% to -7%)    |
| 28 | Uruguay                      | Other exposure to mechanical forces             | 154 (94 to 245)  | 112 (69 to 178)  | -27% (-34.6% to -17.5%)   |
| 29 | Uruguay                      | Other road injuries                             | 1 (1 to 2)       | 1 (1 to 2)       | -0.9% (-11.7% to 12.1%)   |
| 30 | Uruguay                      | Other transport injuries                        | 4 (3 to 5)       | 4 (3 to 5)       | 0.2% (-4.7% to 4.4%)      |
| 31 | Uruguay                      | Other unintentional injuries                    | 38 (25 to 59)    | 29 (19 to 46)    | -23.4% (-29.9% to -16.4%) |
| 32 | Uruguay                      | Pedestrian road injuries                        | 16 (12 to 20)    | 13 (10 to 16)    | -19.9% (-28.1% to -10%)   |
| 33 | Uruguay                      | Physical violence by firearm                    | 1 (1 to 1)       | 3 (2 to 4)       | 216.4% (166.7% to 277.3%) |
| 34 | Uruguay                      | Physical violence by other means                | 27 (20 to 38)    | 38 (27 to 54)    | 40.2% (24.4% to 56.2%)    |
| 35 | Uruguay                      | Physical violence by sharp object               | 4 (3 to 7)       | 7 (5 to 12)      | 81.5% (54.5% to 116.5%)   |
| 36 | Uruguay                      | Poisoning by carbon monoxide                    | 0 (0 to 0)       | 0 (0 to 0)       | 27.9% (16% to 41.3%)      |
| 37 | Uruguay                      | Poisoning by other means                        | 0 (0 to 1)       | 0 (0 to 1)       | -0.6% (-7.8% to 7.2%)     |
| 38 | Uruguay                      | Pulmonary aspiration and foreign body in airway | 1 (0 to 1)       | 1 (0 to 1)       | -30.8% (-37.3% to -24%)   |
| 39 | Uruguay                      | Self-harm by firearm                            | 1 (1 to 1)       | 1 (1 to 2)       | 27.1% (10.3% to 44.7%)    |
| 40 | Uruguay                      | Self-harm by other specified means              | 2 (1 to 3)       | 3 (2 to 5)       | 90.6% (77.3% to 105.4%)   |
| 41 | Uruguay                      | Unintentional firearm injuries                  | 23 (14 to 33)    | 10 (6 to 15)     | -57.7% (-64.1% to -50.9%) |
| 42 | Uruguay                      | Venomous animal contact                         | 3 (1 to 6)       | 3 (1 to 6)       | -15.9% (-20.5% to -11.3%) |
| 43 | Uzbekistan                   | Adverse effects of medical treatment            | 0 (0 to 0)       | 0 (0 to 0)       | 0% (0% to 0%)             |
| 44 | Uzbekistan                   | Conflict and terrorism                          | 0 (0 to 0)       | 0 (0 to 0)       | NA                        |

|    |            |                                                 |                 |                 |                           |
|----|------------|-------------------------------------------------|-----------------|-----------------|---------------------------|
| 1  |            |                                                 |                 |                 |                           |
| 2  | Uzbekistan | Cyclist road injuries                           | 20 (13 to 27)   | 23 (16 to 31)   | 14.4% (1.8% to 24.6%)     |
| 3  | Uzbekistan | Drowning                                        | 1 (0 to 1)      | 1 (0 to 1)      | 1.4% (-8.3% to 11.5%)     |
| 4  | Uzbekistan | Environmental heat and cold exposure            | 5 (4 to 7)      | 4 (3 to 6)      | -19.6% (-27.7% to -12.4%) |
| 5  | Uzbekistan | Executions and police conflict                  | 0 (0 to 0)      | 0 (0 to 0)      | NA                        |
| 6  | Uzbekistan | Exposure to forces of nature                    | 0 (0 to 0)      | 0 (0 to 0)      | NA                        |
| 7  | Uzbekistan | Falls                                           | 123 (94 to 162) | 120 (91 to 160) | -1.9% (-7.5% to 3.3%)     |
| 8  | Uzbekistan | Fire, heat, and hot substances                  | 4 (3 to 8)      | 3 (2 to 6)      | -24.3% (-30.8% to -16.8%) |
| 9  | Uzbekistan | Foreign body in eyes                            | 0 (0 to 0)      | 0 (0 to 0)      | 0.8% (0.4% to 1.4%)       |
| 10 | Uzbekistan | Foreign body in other body part                 | 2 (1 to 4)      | 2 (1 to 4)      | -1.9% (-7.3% to 4.3%)     |
| 11 | Uzbekistan | Motor vehicle road injuries                     | 50 (40 to 63)   | 63 (49 to 79)   | 25.2% (11.8% to 38.3%)    |
| 12 | Uzbekistan | Motorcyclist road injuries                      | 3 (2 to 5)      | 4 (3 to 5)      | 7.9% (-5.5% to 21.9%)     |
| 13 | Uzbekistan | Non-venomous animal contact                     | 3 (2 to 5)      | 3 (1 to 5)      | -12% (-17.4% to -6.1%)    |
| 14 | Uzbekistan | Other exposure to mechanical forces             | 47 (28 to 75)   | 50 (30 to 79)   | 5.7% (0.9% to 11.1%)      |
| 15 | Uzbekistan | Other road injuries                             | 2 (1 to 3)      | 2 (1 to 3)      | 12.3% (-2.1% to 24.9%)    |
| 16 | Uzbekistan | Other transport injuries                        | 4 (3 to 6)      | 4 (3 to 6)      | 1.5% (-3.6% to 7.2%)      |
| 17 | Uzbekistan | Other unintentional injuries                    | 32 (21 to 52)   | 26 (17 to 42)   | -19.9% (-27% to -12.5%)   |
| 18 | Uzbekistan | Pedestrian road injuries                        | 30 (23 to 37)   | 31 (24 to 40)   | 5.5% (-6.9% to 17.9%)     |
| 19 | Uzbekistan | Physical violence by firearm                    | 0 (0 to 0)      | 0 (0 to 0)      | 70.6% (44.5% to 100.4%)   |
| 20 | Uzbekistan | Physical violence by other means                | 16 (11 to 22)   | 12 (8 to 17)    | -24.6% (-34.4% to -14.7%) |
| 21 | Uzbekistan | Physical violence by sharp object               | 4 (2 to 6)      | 2 (1 to 4)      | -37% (-46.7% to -27.2%)   |
| 22 | Uzbekistan | Poisoning by carbon monoxide                    | 0 (0 to 0)      | 0 (0 to 0)      | 19.7% (9.9% to 31.4%)     |
| 23 | Uzbekistan | Poisoning by other means                        | 0 (0 to 1)      | 0 (0 to 1)      | -4.1% (-9.7% to 3.3%)     |
| 24 | Uzbekistan | Pulmonary aspiration and foreign body in airway | 1 (1 to 2)      | 1 (0 to 1)      | -12% (-19.4% to -4.1%)    |
| 25 | Uzbekistan | Self-harm by firearm                            | 0 (0 to 0)      | 0 (0 to 0)      | 24.6% (4% to 46.7%)       |
| 26 | Uzbekistan | Self-harm by other specified means              | 2 (1 to 3)      | 3 (2 to 5)      | 65.1% (53.7% to 75.9%)    |
| 27 | Uzbekistan | Unintentional firearm injuries                  | 1 (1 to 2)      | 1 (1 to 2)      | 4% (-4.9% to 13.2%)       |
| 28 | Uzbekistan | Venomous animal contact                         | 3 (1 to 6)      | 3 (1 to 5)      | -11.7% (-16.7% to -5.9%)  |
| 29 | Vanuatu    | Adverse effects of medical treatment            | 0 (0 to 0)      | 0 (0 to 0)      | 0% (0% to 0%)             |
| 30 | Vanuatu    | Conflict and terrorism                          | 0 (0 to 0)      | 0 (0 to 0)      | NA                        |
| 31 | Vanuatu    | Cyclist road injuries                           | 13 (8 to 18)    | 13 (9 to 19)    | 5.8% (-1.2% to 13.1%)     |
| 32 | Vanuatu    | Drowning                                        | 0 (0 to 1)      | 0 (0 to 1)      | -1.4% (-9.9% to 8.6%)     |
| 33 | Vanuatu    | Environmental heat and cold exposure            | 2 (1 to 3)      | 2 (1 to 3)      | -4.2% (-9.5% to 1%)       |
| 34 | Vanuatu    | Executions and police conflict                  | 0 (0 to 0)      | 0 (0 to 0)      | NA                        |
| 35 | Vanuatu    | Exposure to forces of nature                    | 0 (0 to 0)      | 0 (0 to 0)      | NA                        |
| 36 | Vanuatu    | Falls                                           | 43 (34 to 57)   | 59 (46 to 78)   | 36.8% (31.3% to 42.4%)    |
| 37 | Vanuatu    | Fire, heat, and hot substances                  | 1 (1 to 2)      | 1 (1 to 2)      | -4.2% (-9.4% to 1.7%)     |
| 38 | Vanuatu    | Foreign body in eyes                            | 0 (0 to 0)      | 0 (0 to 0)      | -1.3% (-2.1% to -0.8%)    |
| 39 | Vanuatu    | Foreign body in other body part                 | 1 (0 to 1)      | 1 (0 to 1)      | -4% (-8.4% to 0.6%)       |
| 40 | Vanuatu    | Motor vehicle road injuries                     | 29 (22 to 37)   | 29 (22 to 37)   | -0.5% (-7.9% to 6.7%)     |
| 41 | Vanuatu    | Motorcyclist road injuries                      | 15 (11 to 19)   | 17 (13 to 22)   | 14.9% (5.1% to 25%)       |
| 42 | Vanuatu    | Non-venomous animal contact                     | 5 (3 to 9)      | 5 (3 to 8)      | -16% (-20.2% to -11.3%)   |
| 43 | Vanuatu    | Other exposure to mechanical forces             | 14 (8 to 23)    | 12 (7 to 19)    | -15.9% (-21.2% to -11.4%) |
| 44 | Vanuatu    | Other road injuries                             | 2 (1 to 3)      | 2 (1 to 3)      | 3.8% (-5.3% to 12.8%)     |
| 45 |            |                                                 |                 |                 |                           |
| 46 |            |                                                 |                 |                 |                           |



|    |                                    |                                                 |                 |                |                           |
|----|------------------------------------|-------------------------------------------------|-----------------|----------------|---------------------------|
| 1  |                                    |                                                 |                 |                |                           |
| 2  | Vanuatu                            | Other transport injuries                        | 7 (5 to 9)      | 6 (5 to 8)     | -7.3% (-12% to -2.8%)     |
| 3  | Vanuatu                            | Other unintentional injuries                    | 7 (5 to 12)     | 7 (4 to 11)    | -7.4% (-11.6% to -2.7%)   |
| 4  | Vanuatu                            | Pedestrian road injuries                        | 18 (13 to 23)   | 19 (14 to 24)  | 6% (-1% to 13.2%)         |
| 5  | Vanuatu                            | Physical violence by firearm                    | 0 (0 to 0)      | 0 (0 to 0)     | 19.2% (7% to 32.2%)       |
| 6  | Vanuatu                            | Physical violence by other means                | 14 (10 to 20)   | 15 (10 to 21)  | 1.8% (-3.1% to 7.8%)      |
| 7  | Vanuatu                            | Physical violence by sharp object               | 2 (1 to 3)      | 1 (1 to 2)     | -6.5% (-14.5% to 1.6%)    |
| 8  | Vanuatu                            | Poisoning by carbon monoxide                    | 0 (0 to 0)      | 0 (0 to 0)     | 0.4% (-9.5% to 10.2%)     |
| 9  | Vanuatu                            | Poisoning by other means                        | 0 (0 to 0)      | 0 (0 to 0)     | -17.5% (-24.2% to -10.4%) |
| 10 | Vanuatu                            | Pulmonary aspiration and foreign body in airway | 0 (0 to 0)      | 0 (0 to 0)     | 0.4% (-11.5% to 12.8%)    |
| 11 | Vanuatu                            | Self-harm by firearm                            | 1 (1 to 2)      | 1 (1 to 2)     | -3.3% (-16.2% to 10.5%)   |
| 12 | Vanuatu                            | Self-harm by other specified means              | 2 (1 to 4)      | 2 (2 to 4)     | 4.6% (-3.2% to 12.6%)     |
| 13 | Vanuatu                            | Unintentional firearm injuries                  | 2 (1 to 3)      | 2 (1 to 3)     | -23.9% (-30.6% to -17.5%) |
| 14 | Vanuatu                            | Venomous animal contact                         | 3 (1 to 6)      | 3 (1 to 6)     | -9.4% (-15% to -3%)       |
| 15 | Venezuela (Bolivarian Republic of) | Adverse effects of medical treatment            | 0 (0 to 0)      | 0 (0 to 0)     | 0% (0% to 0%)             |
| 16 | Venezuela (Bolivarian Republic of) | Conflict and terrorism                          | 2 (1 to 5)      | 0 (0 to 0)     | NA                        |
| 17 | Venezuela (Bolivarian Republic of) | Cyclist road injuries                           | 31 (21 to 43)   | 21 (14 to 30)  | -31.6% (-40.3% to -22.6%) |
| 18 | Venezuela (Bolivarian Republic of) | Drowning                                        | 0 (0 to 0)      | 0 (0 to 0)     | 10.3% (-4.6% to 27.7%)    |
| 19 | Venezuela (Bolivarian Republic of) | Environmental heat and cold exposure            | 3 (2 to 4)      | 3 (2 to 4)     | -0.1% (-4.8% to 4%)       |
| 20 | Venezuela (Bolivarian Republic of) | Executions and police conflict                  | 0 (0 to 0)      | 0 (0 to 0)     | NA                        |
| 21 | Venezuela (Bolivarian Republic of) | Exposure to forces of nature                    | 0 (0 to 0)      | 0 (0 to 0)     | NA                        |
| 22 | Venezuela (Bolivarian Republic of) | Falls                                           | 101 (78 to 132) | 93 (71 to 125) | -7.4% (-12.6% to -2.2%)   |
| 23 | Venezuela (Bolivarian Republic of) | Fire, heat, and hot substances                  | 4 (2 to 6)      | 3 (2 to 6)     | -7.8% (-12.6% to -2.2%)   |
| 24 | Venezuela (Bolivarian Republic of) | Foreign body in eyes                            | 0 (0 to 0)      | 0 (0 to 0)     | -0.3% (-0.6% to -0.1%)    |
| 25 | Venezuela (Bolivarian Republic of) | Foreign body in other body part                 | 1 (1 to 3)      | 1 (1 to 2)     | -12.8% (-18.7% to -7.8%)  |
| 26 | Venezuela (Bolivarian Republic of) | Motor vehicle road injuries                     | 56 (43 to 72)   | 48 (37 to 61)  | -14.9% (-24.9% to -4.3%)  |
| 27 | Venezuela (Bolivarian Republic of) | Motorcyclist road injuries                      | 15 (12 to 20)   | 17 (13 to 22)  | 10.8% (-3.3% to 27.5%)    |
| 28 | Venezuela (Bolivarian Republic of) | Non-venomous animal contact                     | 6 (3 to 11)     | 5 (3 to 9)     | -14.4% (-19.6% to -9.1%)  |
| 29 | Venezuela (Bolivarian Republic of) | Other exposure to mechanical forces             | 53 (31 to 87)   | 57 (33 to 92)  | 6.9% (-1.2% to 16.9%)     |
| 30 | Venezuela (Bolivarian Republic of) | Other road injuries                             | 8 (5 to 13)     | 6 (4 to 10)    | -21% (-31.3% to -9.8%)    |
| 31 | Venezuela (Bolivarian Republic of) | Other transport injuries                        | 5 (4 to 7)      | 5 (4 to 7)     | 1.8% (-4.1% to 9.2%)      |
| 32 | Venezuela (Bolivarian Republic of) | Other unintentional injuries                    | 13 (9 to 21)    | 11 (7 to 18)   | -18.2% (-24.6% to -11.2%) |
| 33 | Venezuela (Bolivarian Republic of) | Pedestrian road injuries                        | 47 (37 to 59)   | 28 (22 to 35)  | -40.1% (-47% to -32.7%)   |
| 34 | Venezuela (Bolivarian Republic of) | Physical violence by firearm                    | 3 (2 to 4)      | 13 (9 to 17)   | 325% (234.1% to 456.9%)   |
| 35 | Venezuela (Bolivarian Republic of) | Physical violence by other means                | 21 (15 to 30)   | 33 (23 to 50)  | 58.5% (35.9% to 86.2%)    |
| 36 | Venezuela (Bolivarian Republic of) | Physical violence by sharp object               | 8 (5 to 12)     | 8 (5 to 14)    | 9% (-11.3% to 30.1%)      |
| 37 | Venezuela (Bolivarian Republic of) | Poisoning by carbon monoxide                    | 0 (0 to 0)      | 0 (0 to 0)     | 15.7% (4.4% to 28.2%)     |
| 38 | Venezuela (Bolivarian Republic of) | Poisoning by other means                        | 0 (0 to 0)      | 0 (0 to 0)     | -10.3% (-17% to -3.1%)    |
| 39 | Venezuela (Bolivarian Republic of) | Pulmonary aspiration and foreign body in airway | 1 (0 to 1)      | 1 (0 to 1)     | -31% (-38.8% to -22.8%)   |
| 40 | Venezuela (Bolivarian Republic of) | Self-harm by firearm                            | 0 (0 to 1)      | 0 (0 to 1)     | 34.9% (20.5% to 52.9%)    |
| 41 | Venezuela (Bolivarian Republic of) | Self-harm by other specified means              | 0 (0 to 1)      | 0 (0 to 1)     | 23.6% (12.5% to 35.6%)    |
| 42 | Venezuela (Bolivarian Republic of) | Unintentional firearm injuries                  | 7 (4 to 10)     | 8 (5 to 11)    | 13.3% (-0.8% to 30.6%)    |
| 43 | Venezuela (Bolivarian Republic of) | Venomous animal contact                         | 8 (4 to 14)     | 7 (3 to 13)    | -7.6% (-12.1% to -2%)     |
| 44 | Viet Nam                           | Adverse effects of medical treatment            | 0 (0 to 0)      | 0 (0 to 0)     | 0% (0% to 0%)             |
| 45 |                                    |                                                 |                 |                |                           |
| 46 |                                    |                                                 |                 |                |                           |

|    |          |                                                 |               |                  |                           |
|----|----------|-------------------------------------------------|---------------|------------------|---------------------------|
| 1  |          |                                                 |               |                  |                           |
| 2  | Viet Nam | Conflict and terrorism                          | 0 (0 to 0)    | 0 (0 to 0)       | NA                        |
| 3  | Viet Nam | Cyclist road injuries                           | 18 (12 to 25) | 25 (18 to 35)    | 40.6% (28.1% to 54.1%)    |
| 4  | Viet Nam | Drowning                                        | 1 (0 to 1)    | 1 (0 to 1)       | 25% (11.3% to 41%)        |
| 5  | Viet Nam | Environmental heat and cold exposure            | 2 (1 to 2)    | 2 (1 to 2)       | 1.9% (-4.1% to 6.5%)      |
| 6  | Viet Nam | Executions and police conflict                  | 0 (0 to 0)    | 0 (0 to 0)       | NA                        |
| 7  | Viet Nam | Exposure to forces of nature                    | 1 (1 to 3)    | 0 (0 to 0)       | NA                        |
| 8  | Viet Nam | Falls                                           | 64 (51 to 82) | 107 (85 to 134)  | 65.7% (59.5% to 71.9%)    |
| 9  | Viet Nam | Fire, heat, and hot substances                  | 2 (1 to 3)    | 2 (1 to 3)       | 14% (6.9% to 21.5%)       |
| 10 | Viet Nam | Foreign body in eyes                            | 0 (0 to 0)    | 0 (0 to 0)       | 2.4% (1.6% to 3.4%)       |
| 11 | Viet Nam | Foreign body in other body part                 | 1 (1 to 2)    | 1 (1 to 2)       | -0.5% (-7% to 8.8%)       |
| 12 | Viet Nam | Motor vehicle road injuries                     | 35 (26 to 45) | 44 (33 to 57)    | 27.6% (16.9% to 40%)      |
| 13 | Viet Nam | Motorcyclist road injuries                      | 43 (34 to 55) | 63 (50 to 78)    | 44.1% (32.2% to 58.4%)    |
| 14 | Viet Nam | Non-venomous animal contact                     | 6 (3 to 10)   | 5 (3 to 8)       | -23.2% (-29.5% to -16.3%) |
| 15 | Viet Nam | Other exposure to mechanical forces             | 29 (17 to 47) | 25 (15 to 40)    | -14.7% (-20% to -8.1%)    |
| 16 | Viet Nam | Other road injuries                             | 1 (1 to 2)    | 1 (1 to 2)       | 27.7% (15.8% to 42.2%)    |
| 17 | Viet Nam | Other transport injuries                        | 5 (4 to 7)    | 6 (4 to 8)       | 7.2% (-0.2% to 14.6%)     |
| 18 | Viet Nam | Other unintentional injuries                    | 9 (6 to 15)   | 7 (4 to 11)      | -27.3% (-32.5% to -22.1%) |
| 19 | Viet Nam | Pedestrian road injuries                        | 18 (13 to 22) | 15 (11 to 19)    | -14.3% (-21.5% to -7%)    |
| 20 | Viet Nam | Physical violence by firearm                    | 0 (0 to 0)    | 0 (0 to 1)       | 136% (109.4% to 168%)     |
| 21 | Viet Nam | Physical violence by other means                | 18 (13 to 26) | 19 (14 to 26)    | 2% (-4.1% to 9.4%)        |
| 22 | Viet Nam | Physical violence by sharp object               | 3 (2 to 5)    | 2 (1 to 4)       | -26.3% (-34.9% to -16.6%) |
| 23 | Viet Nam | Poisoning by carbon monoxide                    | 0 (0 to 0)    | 0 (0 to 0)       | 9.8% (-1.8% to 22.7%)     |
| 24 | Viet Nam | Poisoning by other means                        | 0 (0 to 0)    | 0 (0 to 0)       | -34.9% (-42.5% to -26.1%) |
| 25 | Viet Nam | Pulmonary aspiration and foreign body in airway | 0 (0 to 1)    | 0 (0 to 0)       | -23.5% (-30.6% to -15.3%) |
| 26 | Viet Nam | Self-harm by firearm                            | 0 (0 to 0)    | 0 (0 to 0)       | 93.3% (65.7% to 133.7%)   |
| 27 | Viet Nam | Self-harm by other specified means              | 2 (1 to 3)    | 2 (1 to 3)       | 12% (6.1% to 18.7%)       |
| 28 | Viet Nam | Unintentional firearm injuries                  | 3 (2 to 5)    | 2 (1 to 3)       | -33.6% (-40.9% to -24.8%) |
| 29 | Viet Nam | Venomous animal contact                         | 2 (1 to 5)    | 2 (1 to 4)       | -25.2% (-32.8% to -16.9%) |
| 30 | Yemen    | Adverse effects of medical treatment            | 0 (0 to 0)    | 0 (0 to 0)       | 0% (0% to 0%)             |
| 31 | Yemen    | Conflict and terrorism                          | 0 (0 to 0)    | 256 (103 to 590) | NA                        |
| 32 | Yemen    | Cyclist road injuries                           | 15 (9 to 21)  | 14 (9 to 20)     | -4.3% (-12.2% to 5.5%)    |
| 33 | Yemen    | Drowning                                        | 0 (0 to 0)    | 0 (0 to 0)       | -25.8% (-32.7% to -17.8%) |
| 34 | Yemen    | Environmental heat and cold exposure            | 3 (2 to 4)    | 3 (2 to 4)       | 0.9% (-4.5% to 5.9%)      |
| 35 | Yemen    | Executions and police conflict                  | 0 (0 to 0)    | 0 (0 to 0)       | NA                        |
| 36 | Yemen    | Exposure to forces of nature                    | 0 (0 to 0)    | 0 (0 to 0)       | NA                        |
| 37 | Yemen    | Falls                                           | 66 (50 to 86) | 77 (59 to 99)    | 17% (12.5% to 22%)        |
| 38 | Yemen    | Fire, heat, and hot substances                  | 1 (1 to 2)    | 1 (0 to 1)       | -34.2% (-39.8% to -28.7%) |
| 39 | Yemen    | Foreign body in eyes                            | 0 (0 to 0)    | 0 (0 to 0)       | 0.7% (0% to 1.9%)         |
| 40 | Yemen    | Foreign body in other body part                 | 1 (1 to 3)    | 1 (1 to 3)       | -1.5% (-7.3% to 3.4%)     |
| 41 | Yemen    | Motor vehicle road injuries                     | 47 (37 to 60) | 39 (30 to 49)    | -17.8% (-24% to -10.9%)   |
| 42 | Yemen    | Motorcyclist road injuries                      | 11 (8 to 15)  | 9 (7 to 12)      | -19.3% (-26.8% to -10.8%) |
| 43 | Yemen    | Non-venomous animal contact                     | 4 (2 to 7)    | 4 (2 to 8)       | 8.8% (3.4% to 14.1%)      |
| 44 | Yemen    | Other exposure to mechanical forces             | 27 (17 to 43) | 23 (14 to 37)    | -15.2% (-20.3% to -9.8%)  |
| 45 |          |                                                 |               |                  |                           |
| 46 |          |                                                 |               |                  |                           |

|    |        |                                                 |               |               |                           |
|----|--------|-------------------------------------------------|---------------|---------------|---------------------------|
| 1  |        |                                                 |               |               |                           |
| 2  | Yemen  | Other road injuries                             | 2 (1 to 3)    | 2 (1 to 3)    | 0.8% (-8.6% to 11.7%)     |
| 3  | Yemen  | Other transport injuries                        | 5 (4 to 7)    | 5 (4 to 7)    | 2.1% (-3.4% to 7.9%)      |
| 4  | Yemen  | Other unintentional injuries                    | 21 (14 to 34) | 16 (11 to 26) | -24% (-27.9% to -19.7%)   |
| 5  | Yemen  | Pedestrian road injuries                        | 30 (23 to 38) | 26 (20 to 33) | -14% (-20.2% to -7.1%)    |
| 6  | Yemen  | Physical violence by firearm                    | 0 (0 to 0)    | 0 (0 to 0)    | 116.3% (90.7% to 145.2%)  |
| 7  | Yemen  | Physical violence by other means                | 10 (7 to 14)  | 13 (9 to 19)  | 28.9% (18.4% to 41%)      |
| 8  | Yemen  | Physical violence by sharp object               | 1 (1 to 2)    | 1 (1 to 2)    | -10.4% (-18.8% to -0.7%)  |
| 9  | Yemen  | Poisoning by carbon monoxide                    | 0 (0 to 0)    | 0 (0 to 0)    | 13.1% (-0.5% to 29.7%)    |
| 10 | Yemen  | Poisoning by other means                        | 0 (0 to 0)    | 0 (0 to 0)    | -31.1% (-38% to -23.3%)   |
| 11 | Yemen  | Pulmonary aspiration and foreign body in airway | 0 (0 to 1)    | 0 (0 to 1)    | -14.1% (-22.4% to -2.7%)  |
| 12 | Yemen  | Self-harm by firearm                            | 0 (0 to 0)    | 0 (0 to 0)    | 19% (6% to 34.3%)         |
| 13 | Yemen  | Self-harm by other specified means              | 1 (1 to 2)    | 1 (1 to 2)    | 11.6% (5.9% to 17.3%)     |
| 14 | Yemen  | Unintentional firearm injuries                  | 2 (1 to 3)    | 1 (1 to 2)    | -16.5% (-24.2% to -7.8%)  |
| 15 | Yemen  | Venomous animal contact                         | 2 (1 to 4)    | 2 (1 to 5)    | 10.3% (3.7% to 17.9%)     |
| 16 | Zambia | Adverse effects of medical treatment            | 0 (0 to 0)    | 0 (0 to 0)    | 0% (0% to 0%)             |
| 17 | Zambia | Conflict and terrorism                          | 3 (1 to 7)    | 0 (0 to 0)    | NA                        |
| 18 | Zambia | Cyclist road injuries                           | 34 (23 to 48) | 34 (23 to 48) | 1.6% (-6% to 9.9%)        |
| 19 | Zambia | Drowning                                        | 0 (0 to 0)    | 0 (0 to 0)    | -8.7% (-16.9% to 0.5%)    |
| 20 | Zambia | Environmental heat and cold exposure            | 0 (0 to 1)    | 0 (0 to 1)    | -3.1% (-10% to 4.8%)      |
| 21 | Zambia | Executions and police conflict                  | 0 (0 to 0)    | 0 (0 to 0)    | NA                        |
| 22 | Zambia | Exposure to forces of nature                    | 0 (0 to 0)    | 0 (0 to 0)    | NA                        |
| 23 | Zambia | Falls                                           | 25 (16 to 38) | 31 (20 to 48) | 22.9% (17.6% to 28.3%)    |
| 24 | Zambia | Fire, heat, and hot substances                  | 0 (0 to 1)    | 0 (0 to 1)    | -16.2% (-21.5% to -10.5%) |
| 25 | Zambia | Foreign body in eyes                            | 0 (0 to 0)    | 0 (0 to 0)    | -0.6% (-1.8% to 0.1%)     |
| 26 | Zambia | Foreign body in other body part                 | 3 (1 to 7)    | 3 (1 to 7)    | 6.9% (1.5% to 13.4%)      |
| 27 | Zambia | Motor vehicle road injuries                     | 25 (17 to 36) | 25 (17 to 36) | 0.1% (-8.2% to 9.7%)      |
| 28 | Zambia | Motorcyclist road injuries                      | 11 (8 to 16)  | 10 (7 to 14)  | -11.2% (-18.4% to -3.3%)  |
| 29 | Zambia | Non-venomous animal contact                     | 5 (2 to 11)   | 4 (2 to 9)    | -18.4% (-23.2% to -13%)   |
| 30 | Zambia | Other exposure to mechanical forces             | 27 (13 to 49) | 24 (12 to 44) | -9.9% (-16.4% to -2.2%)   |
| 31 | Zambia | Other road injuries                             | 1 (0 to 2)    | 1 (1 to 2)    | 14.8% (4.9% to 26%)       |
| 32 | Zambia | Other transport injuries                        | 4 (3 to 5)    | 3 (2 to 4)    | -14.6% (-20.4% to -9.1%)  |
| 33 | Zambia | Other unintentional injuries                    | 3 (2 to 4)    | 2 (1 to 4)    | -13.2% (-21.7% to -4.8%)  |
| 34 | Zambia | Pedestrian road injuries                        | 49 (36 to 65) | 46 (34 to 60) | -6.5% (-12.5% to 0.1%)    |
| 35 | Zambia | Physical violence by firearm                    | 0 (0 to 0)    | 0 (0 to 0)    | 100.3% (77.4% to 127.1%)  |
| 36 | Zambia | Physical violence by other means                | 7 (4 to 10)   | 9 (6 to 14)   | 41.4% (29% to 54.8%)      |
| 37 | Zambia | Physical violence by sharp object               | 2 (1 to 3)    | 3 (1 to 5)    | 51.9% (34.5% to 76.1%)    |
| 38 | Zambia | Poisoning by carbon monoxide                    | 0 (0 to 0)    | 0 (0 to 0)    | 12.8% (-1.2% to 27.7%)    |
| 39 | Zambia | Poisoning by other means                        | 0 (0 to 0)    | 0 (0 to 0)    | -22.7% (-31.3% to -14.4%) |
| 40 | Zambia | Pulmonary aspiration and foreign body in airway | 0 (0 to 0)    | 0 (0 to 0)    | -13.5% (-23.7% to -1.6%)  |
| 41 | Zambia | Self-harm by firearm                            | 0 (0 to 0)    | 0 (0 to 0)    | 35% (23.8% to 48.6%)      |
| 42 | Zambia | Self-harm by other specified means              | 0 (0 to 0)    | 0 (0 to 0)    | 6.1% (-0.6% to 13.6%)     |
| 43 | Zambia | Unintentional firearm injuries                  | 1 (0 to 2)    | 1 (0 to 2)    | -21.4% (-29.9% to -11.9%) |
| 44 | Zambia | Venomous animal contact                         | 1 (0 to 2)    | 1 (0 to 2)    | -18% (-27% to -8.4%)      |
| 45 |        |                                                 |               |               |                           |
| 46 |        |                                                 |               |               |                           |

|    |          |                                                 |               |               |                           |
|----|----------|-------------------------------------------------|---------------|---------------|---------------------------|
| 1  |          |                                                 |               |               |                           |
| 2  | Zimbabwe | Adverse effects of medical treatment            | 0 (0 to 0)    | 0 (0 to 0)    | 0% (0% to 0%)             |
| 3  | Zimbabwe | Conflict and terrorism                          | 1 (0 to 3)    | 0 (0 to 1)    | NA                        |
| 4  | Zimbabwe | Cyclist road injuries                           | 10 (6 to 16)  | 13 (8 to 19)  | 24.1% (10.4% to 40.6%)    |
| 5  | Zimbabwe | Drowning                                        | 0 (0 to 0)    | 0 (0 to 0)    | -14.4% (-21.5% to -7.2%)  |
| 6  | Zimbabwe | Environmental heat and cold exposure            | 0 (0 to 1)    | 0 (0 to 1)    | -1% (-7.7% to 5.2%)       |
| 7  | Zimbabwe | Executions and police conflict                  | 0 (0 to 0)    | 0 (0 to 1)    | NA                        |
| 8  | Zimbabwe | Exposure to forces of nature                    | 0 (0 to 0)    | 9 (4 to 20)   | NA                        |
| 9  | Zimbabwe | Falls                                           | 22 (14 to 33) | 22 (14 to 33) | 0.1% (-3.4% to 3.9%)      |
| 10 | Zimbabwe | Fire, heat, and hot substances                  | 0 (0 to 0)    | 0 (0 to 0)    | 6.1% (-0.3% to 11.8%)     |
| 11 | Zimbabwe | Foreign body in eyes                            | 0 (0 to 0)    | 0 (0 to 0)    | -1.4% (-3.1% to -0.3%)    |
| 12 | Zimbabwe | Foreign body in other body part                 | 4 (2 to 9)    | 4 (2 to 9)    | -4.7% (-10.4% to 1.7%)    |
| 13 | Zimbabwe | Motor vehicle road injuries                     | 19 (12 to 27) | 23 (16 to 33) | 22.3% (8.7% to 38.2%)     |
| 14 | Zimbabwe | Motorcyclist road injuries                      | 10 (7 to 15)  | 9 (6 to 12)   | -17.2% (-25.4% to -7.7%)  |
| 15 | Zimbabwe | Non-venomous animal contact                     | 3 (2 to 7)    | 3 (2 to 7)    | 5.4% (-0.4% to 10.8%)     |
| 16 | Zimbabwe | Other exposure to mechanical forces             | 24 (12 to 43) | 22 (11 to 39) | -7.4% (-12.2% to -2%)     |
| 17 | Zimbabwe | Other road injuries                             | 2 (1 to 3)    | 2 (1 to 4)    | 37.8% (20% to 63.2%)      |
| 18 | Zimbabwe | Other transport injuries                        | 4 (3 to 6)    | 5 (4 to 7)    | 15.1% (8.2% to 23.1%)     |
| 19 | Zimbabwe | Other unintentional injuries                    | 3 (2 to 5)    | 3 (2 to 4)    | -7.1% (-11.3% to -2.1%)   |
| 20 | Zimbabwe | Pedestrian road injuries                        | 45 (34 to 57) | 30 (22 to 39) | -32.5% (-38.5% to -26.4%) |
| 21 | Zimbabwe | Physical violence by firearm                    | 0 (0 to 0)    | 0 (0 to 0)    | -7.2% (-17.6% to 3%)      |
| 22 | Zimbabwe | Physical violence by other means                | 10 (7 to 15)  | 11 (7 to 16)  | 5.6% (-3.4% to 16.4%)     |
| 23 | Zimbabwe | Physical violence by sharp object               | 2 (1 to 4)    | 2 (1 to 4)    | 4.9% (-5.5% to 16.6%)     |
| 24 | Zimbabwe | Poisoning by carbon monoxide                    | 0 (0 to 0)    | 0 (0 to 0)    | -9.3% (-17.3% to 0.1%)    |
| 25 | Zimbabwe | Poisoning by other means                        | 0 (0 to 0)    | 0 (0 to 0)    | -5.5% (-12.2% to 1.1%)    |
| 26 | Zimbabwe | Pulmonary aspiration and foreign body in airway | 0 (0 to 0)    | 0 (0 to 0)    | 10.2% (1.9% to 19.6%)     |
| 27 | Zimbabwe | Self-harm by firearm                            | 0 (0 to 0)    | 0 (0 to 0)    | 15.6% (4.9% to 25.3%)     |
| 28 | Zimbabwe | Self-harm by other specified means              | 0 (0 to 0)    | 0 (0 to 0)    | 30.1% (22.4% to 38%)      |
| 29 | Zimbabwe | Unintentional firearm injuries                  | 0 (0 to 1)    | 0 (0 to 1)    | -4.5% (-12.4% to 4.4%)    |
| 30 | Zimbabwe | Venomous animal contact                         | 0 (0 to 1)    | 0 (0 to 1)    | 12.9% (5.1% to 22.4%)     |

Abbreviations: UI, uncertainty interval; NA, not applicable

eTable 15. Incidence for 1990 and 2019 and percentage changes of age-standardized rates by location and cause for spinal cord injury, 1990–2019

| Location    | Cause                                           | Age-standardized rates per 100,000 (95% UI) (1990) | Age-standardized rates per 100,000 (95% UI) (2019) | Percentage change of age-standardized rates (95% UI) (1990–2019) |
|-------------|-------------------------------------------------|----------------------------------------------------|----------------------------------------------------|------------------------------------------------------------------|
| Afghanistan | Adverse effects of medical treatment            | 0 (0 to 0)                                         | 0 (0 to 0)                                         | 0% (0% to 0%)                                                    |
| Afghanistan | Conflict and terrorism                          | 7 (2 to 21)                                        | 40 (8 to 128)                                      | NA                                                               |
| Afghanistan | Cyclist road injuries                           | 0 (0 to 0)                                         | 0 (0 to 0)                                         | -6.2% (-14.7% to 2.5%)                                           |
| Afghanistan | Drowning                                        | 0 (0 to 0)                                         | 0 (0 to 0)                                         | -20.4% (-25.9% to -13.6%)                                        |
| Afghanistan | Environmental heat and cold exposure            | 0 (0 to 0)                                         | 0 (0 to 0)                                         | -0.9% (-5.2% to 4.8%)                                            |
| Afghanistan | Executions and police conflict                  | 0 (0 to 0)                                         | 0 (0 to 0)                                         | NA                                                               |
| Afghanistan | Exposure to forces of nature                    | 0 (0 to 0)                                         | 0 (0 to 0)                                         | NA                                                               |
| Afghanistan | Falls                                           | 1 (1 to 1)                                         | 1 (1 to 2)                                         | 24.6% (20.1% to 29.1%)                                           |
| Afghanistan | Fire, heat, and hot substances                  | 0 (0 to 0)                                         | 0 (0 to 0)                                         | -10.1% (-16.6% to -2%)                                           |
| Afghanistan | Foreign body in eyes                            | 0 (0 to 0)                                         | 0 (0 to 0)                                         | 0% (0% to 0%)                                                    |
| Afghanistan | Foreign body in other body part                 | 0 (0 to 0)                                         | 0 (0 to 0)                                         | -2.2% (-5.7% to 1.4%)                                            |
| Afghanistan | Motor vehicle road injuries                     | 0 (0 to 1)                                         | 0 (0 to 1)                                         | -19% (-25.6% to -12%)                                            |
| Afghanistan | Motorcyclist road injuries                      | 0 (0 to 0)                                         | 0 (0 to 0)                                         | -8.9% (-18.5% to 0.9%)                                           |
| Afghanistan | Non-venomous animal contact                     | 0 (0 to 0)                                         | 0 (0 to 0)                                         | -5.5% (-11.1% to -0.2%)                                          |
| Afghanistan | Other exposure to mechanical forces             | 0 (0 to 1)                                         | 0 (0 to 1)                                         | -3.8% (-9.3% to 2.1%)                                            |
| Afghanistan | Other road injuries                             | 0 (0 to 0)                                         | 0 (0 to 0)                                         | -3.9% (-14.2% to 6.9%)                                           |
| Afghanistan | Other transport injuries                        | 0 (0 to 0)                                         | 0 (0 to 0)                                         | 4.7% (0.6% to 9.5%)                                              |
| Afghanistan | Other unintentional injuries                    | 0 (0 to 0)                                         | 0 (0 to 0)                                         | -21.3% (-25.4% to -16.9%)                                        |
| Afghanistan | Pedestrian road injuries                        | 0 (0 to 0)                                         | 0 (0 to 0)                                         | -19.8% (-26.9% to -12.1%)                                        |
| Afghanistan | Physical violence by firearm                    | 0 (0 to 0)                                         | 0 (0 to 0)                                         | 21.9% (6% to 44.7%)                                              |
| Afghanistan | Physical violence by other means                | 0 (0 to 1)                                         | 0 (0 to 1)                                         | 6.4% (-1.5% to 15.3%)                                            |
| Afghanistan | Physical violence by sharp object               | 0 (0 to 0)                                         | 0 (0 to 0)                                         | -20.8% (-29.7% to -12.6%)                                        |
| Afghanistan | Poisoning by carbon monoxide                    | 0 (0 to 0)                                         | 0 (0 to 0)                                         | 31.4% (17.9% to 46.6%)                                           |
| Afghanistan | Poisoning by other means                        | 0 (0 to 0)                                         | 0 (0 to 0)                                         | -16.5% (-23.1% to -9.3%)                                         |
| Afghanistan | Pulmonary aspiration and foreign body in airway | 0 (0 to 0)                                         | 0 (0 to 0)                                         | -20.2% (-28.9% to -11.3%)                                        |
| Afghanistan | Self-harm by firearm                            | 0 (0 to 0)                                         | 0 (0 to 0)                                         | 13.2% (2.1% to 27.9%)                                            |
| Afghanistan | Self-harm by other specified means              | 0 (0 to 0)                                         | 0 (0 to 0)                                         | -15.3% (-20.4% to -10.2%)                                        |
| Afghanistan | Unintentional firearm injuries                  | 0 (0 to 0)                                         | 0 (0 to 0)                                         | -2.9% (-10.4% to 5.5%)                                           |
| Afghanistan | Venomous animal contact                         | 0 (0 to 0)                                         | 0 (0 to 0)                                         | -2.3% (-8.8% to 6%)                                              |
| Albania     | Adverse effects of medical treatment            | 0 (0 to 0)                                         | 0 (0 to 0)                                         | 0% (0% to 0%)                                                    |
| Albania     | Conflict and terrorism                          | 0 (0 to 0)                                         | 0 (0 to 0)                                         | NA                                                               |
| Albania     | Cyclist road injuries                           | 1 (0 to 1)                                         | 1 (0 to 1)                                         | 9.4% (0.4% to 19.7%)                                             |
| Albania     | Drowning                                        | 0 (0 to 0)                                         | 0 (0 to 0)                                         | 106.1% (80.9% to 132.1%)                                         |
| Albania     | Environmental heat and cold exposure            | 0 (0 to 0)                                         | 0 (0 to 0)                                         | 3.7% (0% to 7.3%)                                                |
| Albania     | Executions and police conflict                  | 0 (0 to 0)                                         | 0 (0 to 0)                                         | NA                                                               |
| Albania     | Exposure to forces of nature                    | 0 (0 to 0)                                         | 0 (0 to 0)                                         | NA                                                               |
| Albania     | Falls                                           | 3 (2 to 4)                                         | 4 (3 to 6)                                         | 54.7% (48.6% to 60.1%)                                           |
| Albania     | Fire, heat, and hot substances                  | 0 (0 to 0)                                         | 0 (0 to 0)                                         | 1.6% (-3.8% to 6.6%)                                             |
| Albania     | Foreign body in eyes                            | 0 (0 to 0)                                         | 0 (0 to 0)                                         | 0% (0% to 0%)                                                    |

|    |         |                                                 |            |            |                           |
|----|---------|-------------------------------------------------|------------|------------|---------------------------|
| 1  |         |                                                 |            |            |                           |
| 2  | Albania | Foreign body in other body part                 | 0 (0 to 0) | 0 (0 to 0) | -0.7% (-5.3% to 3.3%)     |
| 3  | Albania | Motor vehicle road injuries                     | 1 (1 to 2) | 1 (1 to 2) | 6.6% (-1.7% to 15.3%)     |
| 4  | Albania | Motorcyclist road injuries                      | 0 (0 to 0) | 0 (0 to 0) | 46% (29.3% to 66.5%)      |
| 5  | Albania | Non-venomous animal contact                     | 0 (0 to 0) | 0 (0 to 0) | -19.3% (-22.8% to -14.8%) |
| 6  | Albania | Other exposure to mechanical forces             | 3 (1 to 6) | 2 (1 to 4) | -32.8% (-37.5% to -26.7%) |
| 7  | Albania | Other road injuries                             | 0 (0 to 0) | 0 (0 to 0) | 6% (-3.7% to 17.1%)       |
| 8  | Albania | Other transport injuries                        | 0 (0 to 0) | 0 (0 to 0) | -10.6% (-15.5% to -6.3%)  |
| 9  | Albania | Other unintentional injuries                    | 1 (0 to 1) | 0 (0 to 0) | -35.4% (-40.9% to -30.3%) |
| 10 | Albania | Pedestrian road injuries                        | 0 (0 to 1) | 0 (0 to 1) | -4.8% (-14% to 5.2%)      |
| 11 | Albania | Physical violence by firearm                    | 0 (0 to 0) | 0 (0 to 0) | -44% (-53.7% to -32.9%)   |
| 12 | Albania | Physical violence by other means                | 1 (0 to 1) | 0 (0 to 1) | -46.5% (-53.7% to -39.3%) |
| 13 | Albania | Physical violence by sharp object               | 0 (0 to 0) | 0 (0 to 0) | -63.1% (-70% to -55.8%)   |
| 14 | Albania | Poisoning by carbon monoxide                    | 0 (0 to 0) | 0 (0 to 0) | 44.8% (33.4% to 59.6%)    |
| 15 | Albania | Poisoning by other means                        | 0 (0 to 0) | 0 (0 to 0) | -1.3% (-7.7% to 5.5%)     |
| 16 | Albania | Pulmonary aspiration and foreign body in airway | 0 (0 to 0) | 0 (0 to 0) | -15.2% (-21.6% to -8.9%)  |
| 17 | Albania | Self-harm by firearm                            | 0 (0 to 0) | 0 (0 to 0) | 68.3% (52% to 86.2%)      |
| 18 | Albania | Self-harm by other specified means              | 0 (0 to 0) | 0 (0 to 0) | 58% (46.9% to 69.4%)      |
| 19 | Albania | Unintentional firearm injuries                  | 0 (0 to 0) | 0 (0 to 0) | -57.4% (-64% to -50.9%)   |
| 20 | Albania | Venomous animal contact                         | 0 (0 to 0) | 0 (0 to 0) | -20.8% (-25.7% to -14.9%) |
| 21 | Algeria | Adverse effects of medical treatment            | 0 (0 to 0) | 0 (0 to 0) | 0% (0% to 0%)             |
| 22 | Algeria | Conflict and terrorism                          | 0 (0 to 0) | 0 (0 to 0) | NA                        |
| 23 | Algeria | Cyclist road injuries                           | 0 (0 to 0) | 0 (0 to 0) | -5.3% (-13.6% to 5.2%)    |
| 24 | Algeria | Drowning                                        | 0 (0 to 0) | 0 (0 to 0) | 65.7% (38.9% to 93.2%)    |
| 25 | Algeria | Environmental heat and cold exposure            | 0 (0 to 0) | 0 (0 to 0) | 2.5% (-1.6% to 7.1%)      |
| 26 | Algeria | Executions and police conflict                  | 0 (0 to 0) | 0 (0 to 0) | NA                        |
| 27 | Algeria | Exposure to forces of nature                    | 0 (0 to 0) | 0 (0 to 0) | NA                        |
| 28 | Algeria | Falls                                           | 2 (1 to 2) | 2 (2 to 3) | 21.2% (16.7% to 25.8%)    |
| 29 | Algeria | Fire, heat, and hot substances                  | 0 (0 to 0) | 0 (0 to 0) | -35.2% (-39.9% to -30.4%) |
| 30 | Algeria | Foreign body in eyes                            | 0 (0 to 0) | 0 (0 to 0) | 0% (0% to 0%)             |
| 31 | Algeria | Foreign body in other body part                 | 0 (0 to 0) | 0 (0 to 0) | 0.4% (-3.4% to 4.2%)      |
| 32 | Algeria | Motor vehicle road injuries                     | 1 (1 to 2) | 1 (0 to 1) | -32.3% (-37% to -26.8%)   |
| 33 | Algeria | Motorcyclist road injuries                      | 0 (0 to 0) | 0 (0 to 0) | -37.6% (-44.8% to -29.4%) |
| 34 | Algeria | Non-venomous animal contact                     | 0 (0 to 0) | 0 (0 to 0) | 2.9% (-1.2% to 8.1%)      |
| 35 | Algeria | Other exposure to mechanical forces             | 0 (0 to 1) | 0 (0 to 0) | -17.2% (-23.7% to -11.2%) |
| 36 | Algeria | Other road injuries                             | 0 (0 to 0) | 0 (0 to 0) | 1.4% (-8.3% to 13.4%)     |
| 37 | Algeria | Other transport injuries                        | 0 (0 to 0) | 0 (0 to 0) | -3.4% (-7.8% to 1.7%)     |
| 38 | Algeria | Other unintentional injuries                    | 0 (0 to 0) | 0 (0 to 0) | -16.7% (-22% to -11.7%)   |
| 39 | Algeria | Pedestrian road injuries                        | 0 (0 to 1) | 0 (0 to 0) | -39% (-44.6% to -32.3%)   |
| 40 | Algeria | Physical violence by firearm                    | 0 (0 to 0) | 0 (0 to 0) | 89% (66.4% to 119.4%)     |
| 41 | Algeria | Physical violence by other means                | 0 (0 to 0) | 0 (0 to 0) | -20% (-27.1% to -12.6%)   |
| 42 | Algeria | Physical violence by sharp object               | 0 (0 to 0) | 0 (0 to 0) | -31.8% (-41% to -23.6%)   |
| 43 | Algeria | Poisoning by carbon monoxide                    | 0 (0 to 0) | 0 (0 to 0) | 20.7% (6.4% to 37.5%)     |
| 44 | Algeria | Poisoning by other means                        | 0 (0 to 0) | 0 (0 to 0) | -27.8% (-35.7% to -19.5%) |
| 45 |         |                                                 |            |            |                           |
| 46 |         |                                                 |            |            |                           |

|    |                |                                                 |             |             |                           |
|----|----------------|-------------------------------------------------|-------------|-------------|---------------------------|
| 1  |                |                                                 |             |             |                           |
| 2  | Algeria        | Pulmonary aspiration and foreign body in airway | 0 (0 to 0)  | 0 (0 to 0)  | -10.2% (-18.6% to -2.9%)  |
| 3  | Algeria        | Self-harm by firearm                            | 0 (0 to 0)  | 0 (0 to 0)  | 10.8% (-0.5% to 24.1%)    |
| 4  | Algeria        | Self-harm by other specified means              | 0 (0 to 0)  | 0 (0 to 0)  | -22.6% (-27.4% to -17.7%) |
| 5  | Algeria        | Unintentional firearm injuries                  | 0 (0 to 0)  | 0 (0 to 0)  | 1.1% (-6% to 10.2%)       |
| 6  | Algeria        | Venomous animal contact                         | 0 (0 to 0)  | 0 (0 to 0)  | 4.7% (-1.1% to 12.1%)     |
| 7  | American Samoa | Adverse effects of medical treatment            | 0 (0 to 0)  | 0 (0 to 0)  | 0% (0% to 0%)             |
| 8  | American Samoa | Conflict and terrorism                          | 0 (0 to 0)  | 0 (0 to 0)  | NA                        |
| 9  | American Samoa | Cyclist road injuries                           | 0 (0 to 1)  | 0 (0 to 1)  | 2.9% (-4.3% to 11.7%)     |
| 10 | American Samoa | Drowning                                        | 0 (0 to 0)  | 0 (0 to 0)  | 13% (1.9% to 25.3%)       |
| 11 | American Samoa | Environmental heat and cold exposure            | 0 (0 to 0)  | 0 (0 to 0)  | -19.9% (-24.9% to -14.9%) |
| 12 | American Samoa | Executions and police conflict                  | 0 (0 to 0)  | 0 (0 to 0)  | NA                        |
| 13 | American Samoa | Exposure to forces of nature                    | 0 (0 to 0)  | 0 (0 to 0)  | NA                        |
| 14 | American Samoa | Falls                                           | 4 (3 to 6)  | 5 (4 to 8)  | 33.6% (28.3% to 39%)      |
| 15 | American Samoa | Fire, heat, and hot substances                  | 0 (0 to 0)  | 0 (0 to 0)  | 9.4% (3.9% to 15.3%)      |
| 16 | American Samoa | Foreign body in eyes                            | 0 (0 to 0)  | 0 (0 to 0)  | 0% (0% to 0%)             |
| 17 | American Samoa | Foreign body in other body part                 | 0 (0 to 0)  | 0 (0 to 0)  | -2.1% (-5.4% to 1%)       |
| 18 | American Samoa | Motor vehicle road injuries                     | 1 (0 to 2)  | 1 (0 to 1)  | -29.3% (-35.5% to -23.5%) |
| 19 | American Samoa | Motorcyclist road injuries                      | 1 (0 to 1)  | 1 (0 to 1)  | -6.8% (-14.5% to 2.4%)    |
| 20 | American Samoa | Non-venomous animal contact                     | 0 (0 to 0)  | 0 (0 to 0)  | 1.9% (-2.7% to 7%)        |
| 21 | American Samoa | Other exposure to mechanical forces             | 0 (0 to 1)  | 0 (0 to 0)  | -30.2% (-35.7% to -25.5%) |
| 22 | American Samoa | Other road injuries                             | 0 (0 to 0)  | 0 (0 to 0)  | -6.5% (-15.6% to 3.8%)    |
| 23 | American Samoa | Other transport injuries                        | 0 (0 to 1)  | 0 (0 to 1)  | -29.3% (-34.9% to -24.5%) |
| 24 | American Samoa | Other unintentional injuries                    | 0 (0 to 1)  | 0 (0 to 0)  | -17.2% (-21.8% to -12.6%) |
| 25 | American Samoa | Pedestrian road injuries                        | 1 (0 to 1)  | 0 (0 to 1)  | -15.9% (-23.1% to -8.3%)  |
| 26 | American Samoa | Physical violence by firearm                    | 0 (0 to 0)  | 0 (0 to 0)  | -26.5% (-40.6% to -11.2%) |
| 27 | American Samoa | Physical violence by other means                | 1 (0 to 2)  | 1 (0 to 1)  | -11.6% (-17.3% to -5.7%)  |
| 28 | American Samoa | Physical violence by sharp object               | 0 (0 to 0)  | 0 (0 to 0)  | -38.7% (-47.5% to -30.2%) |
| 29 | American Samoa | Poisoning by carbon monoxide                    | 0 (0 to 0)  | 0 (0 to 0)  | 5.8% (-3.4% to 16.2%)     |
| 30 | American Samoa | Poisoning by other means                        | 0 (0 to 0)  | 0 (0 to 0)  | -10.7% (-16.6% to -3.4%)  |
| 31 | American Samoa | Pulmonary aspiration and foreign body in airway | 0 (0 to 0)  | 0 (0 to 0)  | 17.5% (4.8% to 30.6%)     |
| 32 | American Samoa | Self-harm by firearm                            | 0 (0 to 0)  | 0 (0 to 0)  | -9.8% (-25.5% to 4%)      |
| 33 | American Samoa | Self-harm by other specified means              | 0 (0 to 0)  | 0 (0 to 0)  | 20.2% (12.6% to 30.2%)    |
| 34 | American Samoa | Unintentional firearm injuries                  | 0 (0 to 0)  | 0 (0 to 0)  | -39.1% (-48.7% to -30.9%) |
| 35 | American Samoa | Venomous animal contact                         | 0 (0 to 0)  | 0 (0 to 0)  | -7.4% (-15% to -0.1%)     |
| 36 | Andorra        | Adverse effects of medical treatment            | 0 (0 to 0)  | 0 (0 to 0)  | 0% (0% to 0%)             |
| 37 | Andorra        | Conflict and terrorism                          | 0 (0 to 0)  | 0 (0 to 0)  | NA                        |
| 38 | Andorra        | Cyclist road injuries                           | 0 (0 to 1)  | 0 (0 to 0)  | -14.1% (-20.9% to -6.3%)  |
| 39 | Andorra        | Drowning                                        | 0 (0 to 0)  | 0 (0 to 0)  | 65.1% (47.8% to 81.5%)    |
| 40 | Andorra        | Environmental heat and cold exposure            | 0 (0 to 0)  | 0 (0 to 0)  | 1.2% (-2.3% to 5.2%)      |
| 41 | Andorra        | Executions and police conflict                  | 0 (0 to 0)  | 0 (0 to 0)  | NA                        |
| 42 | Andorra        | Exposure to forces of nature                    | 0 (0 to 0)  | 0 (0 to 0)  | NA                        |
| 43 | Andorra        | Falls                                           | 7 (5 to 10) | 8 (6 to 11) | 8.1% (3.1% to 13%)        |
| 44 | Andorra        | Fire, heat, and hot substances                  | 0 (0 to 0)  | 0 (0 to 0)  | 0.6% (-3.8% to 4.8%)      |
| 45 |                |                                                 |             |             |                           |
| 46 |                |                                                 |             |             |                           |

|    |         |                                                 |              |            |                           |
|----|---------|-------------------------------------------------|--------------|------------|---------------------------|
| 1  |         |                                                 |              |            |                           |
| 2  | Andorra | Foreign body in eyes                            | 0 (0 to 0)   | 0 (0 to 0) | 0% (0% to 0%)             |
| 3  | Andorra | Foreign body in other body part                 | 0 (0 to 0)   | 0 (0 to 0) | -0.4% (-4.1% to 3.6%)     |
| 4  | Andorra | Motor vehicle road injuries                     | 1 (0 to 1)   | 0 (0 to 1) | -22.6% (-28.8% to -16.2%) |
| 5  | Andorra | Motorcyclist road injuries                      | 0 (0 to 0)   | 0 (0 to 0) | -6.5% (-16.3% to 4.1%)    |
| 6  | Andorra | Non-venomous animal contact                     | 0 (0 to 0)   | 0 (0 to 0) | -6.1% (-9.9% to -2.7%)    |
| 7  | Andorra | Other exposure to mechanical forces             | 0 (0 to 1)   | 0 (0 to 1) | 1.9% (-3% to 6.9%)        |
| 8  | Andorra | Other road injuries                             | 0 (0 to 0)   | 0 (0 to 0) | -9.1% (-17.1% to 0.2%)    |
| 9  | Andorra | Other transport injuries                        | 0 (0 to 0)   | 0 (0 to 0) | 1.1% (-2.9% to 5%)        |
| 10 | Andorra | Other unintentional injuries                    | 0 (0 to 0)   | 0 (0 to 0) | -2.2% (-5.7% to 1.3%)     |
| 11 | Andorra | Pedestrian road injuries                        | 0 (0 to 0)   | 0 (0 to 0) | -22.8% (-31.3% to -13.8%) |
| 12 | Andorra | Physical violence by firearm                    | 0 (0 to 0)   | 0 (0 to 0) | 26% (14.7% to 39.6%)      |
| 13 | Andorra | Physical violence by other means                | 0 (0 to 0)   | 0 (0 to 0) | -8.8% (-16.2% to -2%)     |
| 14 | Andorra | Physical violence by sharp object               | 0 (0 to 0)   | 0 (0 to 0) | -13.1% (-22.5% to -4.3%)  |
| 15 | Andorra | Poisoning by carbon monoxide                    | 0 (0 to 0)   | 0 (0 to 0) | 12.5% (5.4% to 20.2%)     |
| 16 | Andorra | Poisoning by other means                        | 0 (0 to 0)   | 0 (0 to 0) | -4.3% (-9.6% to 1.2%)     |
| 17 | Andorra | Pulmonary aspiration and foreign body in airway | 0 (0 to 0)   | 0 (0 to 0) | -10.6% (-18.3% to -3.1%)  |
| 18 | Andorra | Self-harm by firearm                            | 0 (0 to 0)   | 0 (0 to 0) | -8.2% (-17.6% to 1.3%)    |
| 19 | Andorra | Self-harm by other specified means              | 0 (0 to 0)   | 0 (0 to 0) | -15% (-18.9% to -11.4%)   |
| 20 | Andorra | Unintentional firearm injuries                  | 0 (0 to 0)   | 0 (0 to 0) | 6% (-1.3% to 13.3%)       |
| 21 | Andorra | Venomous animal contact                         | 0 (0 to 0)   | 0 (0 to 0) | -8.2% (-13.9% to -2.8%)   |
| 22 | Angola  | Adverse effects of medical treatment            | 0 (0 to 0)   | 0 (0 to 0) | 0% (0% to 0%)             |
| 23 | Angola  | Conflict and terrorism                          | 14 (3 to 42) | 0 (0 to 0) | NA                        |
| 24 | Angola  | Cyclist road injuries                           | 0 (0 to 0)   | 0 (0 to 0) | 27.2% (16.2% to 37.8%)    |
| 25 | Angola  | Drowning                                        | 0 (0 to 0)   | 0 (0 to 0) | -27.9% (-35.8% to -20.3%) |
| 26 | Angola  | Environmental heat and cold exposure            | 0 (0 to 0)   | 0 (0 to 0) | -10.6% (-18% to -3.9%)    |
| 27 | Angola  | Executions and police conflict                  | 0 (0 to 0)   | 0 (0 to 0) | NA                        |
| 28 | Angola  | Exposure to forces of nature                    | 0 (0 to 0)   | 0 (0 to 0) | NA                        |
| 29 | Angola  | Falls                                           | 1 (1 to 1)   | 1 (1 to 2) | 27.2% (22.7% to 31.5%)    |
| 30 | Angola  | Fire, heat, and hot substances                  | 0 (0 to 0)   | 0 (0 to 0) | -19.9% (-25.9% to -14.8%) |
| 31 | Angola  | Foreign body in eyes                            | 0 (0 to 0)   | 0 (0 to 0) | 0% (0% to 0%)             |
| 32 | Angola  | Foreign body in other body part                 | 0 (0 to 1)   | 0 (0 to 1) | -12.1% (-16% to -8.2%)    |
| 33 | Angola  | Motor vehicle road injuries                     | 1 (0 to 1)   | 1 (0 to 1) | 5.8% (-1.7% to 14.1%)     |
| 34 | Angola  | Motorcyclist road injuries                      | 0 (0 to 0)   | 0 (0 to 0) | 3.6% (-8.2% to 15.2%)     |
| 35 | Angola  | Non-venomous animal contact                     | 0 (0 to 0)   | 0 (0 to 0) | -33.6% (-38% to -29.3%)   |
| 36 | Angola  | Other exposure to mechanical forces             | 0 (0 to 0)   | 0 (0 to 0) | -17.4% (-24.1% to -10.9%) |
| 37 | Angola  | Other road injuries                             | 0 (0 to 0)   | 0 (0 to 0) | 18.9% (7.4% to 31.6%)     |
| 38 | Angola  | Other transport injuries                        | 0 (0 to 0)   | 0 (0 to 0) | -20.1% (-25.4% to -15.4%) |
| 39 | Angola  | Other unintentional injuries                    | 0 (0 to 0)   | 0 (0 to 0) | -21.9% (-27.1% to -15.9%) |
| 40 | Angola  | Pedestrian road injuries                        | 1 (0 to 1)   | 0 (0 to 1) | -16.9% (-23.8% to -10.8%) |
| 41 | Angola  | Physical violence by firearm                    | 0 (0 to 0)   | 0 (0 to 0) | 20.7% (8.8% to 35.2%)     |
| 42 | Angola  | Physical violence by other means                | 0 (0 to 0)   | 0 (0 to 0) | -8.2% (-15% to -1.5%)     |
| 43 | Angola  | Physical violence by sharp object               | 0 (0 to 0)   | 0 (0 to 0) | -10.2% (-16.8% to -3.7%)  |
| 44 | Angola  | Poisoning by carbon monoxide                    | 0 (0 to 0)   | 0 (0 to 0) | 5.6% (-6.5% to 20.3%)     |
| 45 |         |                                                 |              |            |                           |
| 46 |         |                                                 |              |            |                           |



|    |                     |                                                 |            |            |                           |
|----|---------------------|-------------------------------------------------|------------|------------|---------------------------|
| 1  |                     |                                                 |            |            |                           |
| 2  | Angola              | Poisoning by other means                        | 0 (0 to 0) | 0 (0 to 0) | -33.3% (-39.8% to -25.5%) |
| 3  | Angola              | Pulmonary aspiration and foreign body in airway | 0 (0 to 0) | 0 (0 to 0) | -37.4% (-45.3% to -28.8%) |
| 4  | Angola              | Self-harm by firearm                            | 0 (0 to 0) | 0 (0 to 0) | 28.4% (12.9% to 46.5%)    |
| 5  | Angola              | Self-harm by other specified means              | 0 (0 to 0) | 0 (0 to 0) | -5.6% (-10.9% to -0.5%)   |
| 6  | Angola              | Unintentional firearm injuries                  | 0 (0 to 0) | 0 (0 to 0) | -25% (-32.1% to -17.9%)   |
| 7  | Angola              | Venomous animal contact                         | 0 (0 to 0) | 0 (0 to 0) | -22.6% (-31.1% to -12.4%) |
| 8  | Antigua and Barbuda | Adverse effects of medical treatment            | 0 (0 to 0) | 0 (0 to 0) | 0% (0% to 0%)             |
| 9  | Antigua and Barbuda | Conflict and terrorism                          | 0 (0 to 0) | 0 (0 to 0) | NA                        |
| 10 | Antigua and Barbuda | Cyclist road injuries                           | 0 (0 to 0) | 0 (0 to 0) | -7.9% (-16.7% to 1.8%)    |
| 11 | Antigua and Barbuda | Drowning                                        | 0 (0 to 0) | 0 (0 to 0) | 24.7% (12% to 37.7%)      |
| 12 | Antigua and Barbuda | Environmental heat and cold exposure            | 0 (0 to 1) | 0 (0 to 1) | 8.9% (4.2% to 13%)        |
| 13 | Antigua and Barbuda | Executions and police conflict                  | 0 (0 to 0) | 0 (0 to 0) | NA                        |
| 14 | Antigua and Barbuda | Exposure to forces of nature                    | 0 (0 to 0) | 0 (0 to 0) | NA                        |
| 15 | Antigua and Barbuda | Falls                                           | 1 (1 to 1) | 1 (1 to 2) | 52.3% (46.3% to 58.1%)    |
| 16 | Antigua and Barbuda | Fire, heat, and hot substances                  | 0 (0 to 0) | 0 (0 to 0) | -18.8% (-23.8% to -13.9%) |
| 17 | Antigua and Barbuda | Foreign body in eyes                            | 0 (0 to 0) | 0 (0 to 0) | 0% (0% to 0%)             |
| 18 | Antigua and Barbuda | Foreign body in other body part                 | 0 (0 to 0) | 0 (0 to 0) | 3% (-1.5% to 7.6%)        |
| 19 | Antigua and Barbuda | Motor vehicle road injuries                     | 0 (0 to 1) | 0 (0 to 1) | -24.9% (-31.8% to -17.3%) |
| 20 | Antigua and Barbuda | Motorcyclist road injuries                      | 0 (0 to 0) | 0 (0 to 0) | 6.8% (-5.5% to 22.3%)     |
| 21 | Antigua and Barbuda | Non-venomous animal contact                     | 0 (0 to 0) | 0 (0 to 0) | 12.5% (3.8% to 23.2%)     |
| 22 | Antigua and Barbuda | Other exposure to mechanical forces             | 1 (0 to 1) | 1 (0 to 1) | 10.5% (1.1% to 19.5%)     |
| 23 | Antigua and Barbuda | Other road injuries                             | 0 (0 to 0) | 0 (0 to 0) | -3% (-12.5% to 7.8%)      |
| 24 | Antigua and Barbuda | Other transport injuries                        | 0 (0 to 0) | 0 (0 to 0) | 7.7% (3.2% to 13.1%)      |
| 25 | Antigua and Barbuda | Other unintentional injuries                    | 0 (0 to 0) | 0 (0 to 0) | -14% (-18.9% to -9.7%)    |
| 26 | Antigua and Barbuda | Pedestrian road injuries                        | 0 (0 to 0) | 0 (0 to 0) | -12.2% (-20.9% to -3%)    |
| 27 | Antigua and Barbuda | Physical violence by firearm                    | 0 (0 to 0) | 0 (0 to 0) | 63.1% (41.5% to 93.3%)    |
| 28 | Antigua and Barbuda | Physical violence by other means                | 0 (0 to 0) | 0 (0 to 0) | -4.8% (-14.1% to 4.1%)    |
| 29 | Antigua and Barbuda | Physical violence by sharp object               | 0 (0 to 0) | 0 (0 to 0) | 0.2% (-10.2% to 11.9%)    |
| 30 | Antigua and Barbuda | Poisoning by carbon monoxide                    | 0 (0 to 0) | 0 (0 to 0) | 10.7% (-2.6% to 25.4%)    |
| 31 | Antigua and Barbuda | Poisoning by other means                        | 0 (0 to 0) | 0 (0 to 0) | -20.2% (-29.7% to -11%)   |
| 32 | Antigua and Barbuda | Pulmonary aspiration and foreign body in airway | 0 (0 to 0) | 0 (0 to 0) | -18.9% (-25.1% to -11.8%) |
| 33 | Antigua and Barbuda | Self-harm by firearm                            | 0 (0 to 0) | 0 (0 to 0) | 29.9% (17.8% to 45.5%)    |
| 34 | Antigua and Barbuda | Self-harm by other specified means              | 0 (0 to 0) | 0 (0 to 0) | 20.7% (12.3% to 29.9%)    |
| 35 | Antigua and Barbuda | Unintentional firearm injuries                  | 0 (0 to 1) | 1 (0 to 1) | 13.4% (3.3% to 25.5%)     |
| 36 | Antigua and Barbuda | Venomous animal contact                         | 0 (0 to 0) | 0 (0 to 0) | 10.4% (1.7% to 20.9%)     |
| 37 | Argentina           | Venomous animal contact                         | 0 (0 to 0) | 0 (0 to 0) | 0% (0% to 0%)             |
| 38 | Argentina           | Adverse effects of medical treatment            | 0 (0 to 0) | 0 (0 to 0) | 0% (0% to 0%)             |
| 39 | Argentina           | Conflict and terrorism                          | 0 (0 to 1) | 0 (0 to 0) | NA                        |
| 40 | Argentina           | Cyclist road injuries                           | 0 (0 to 0) | 0 (0 to 0) | -3.7% (-13.9% to 8.2%)    |
| 41 | Argentina           | Drowning                                        | 0 (0 to 0) | 0 (0 to 0) | 32.9% (16.3% to 49.7%)    |
| 42 | Argentina           | Environmental heat and cold exposure            | 0 (0 to 0) | 0 (0 to 0) | 1.2% (-4% to 7%)          |
| 43 | Argentina           | Executions and police conflict                  | 0 (0 to 0) | 0 (0 to 0) | NA                        |
| 44 | Argentina           | Exposure to forces of nature                    | 0 (0 to 0) | 0 (0 to 0) | NA                        |
| 45 | Argentina           | Falls                                           | 3 (2 to 4) | 3 (2 to 4) | 1.7% (-3.4% to 6.4%)      |
| 46 |                     |                                                 |            |            |                           |

|    |           |                                                 |            |            |                           |
|----|-----------|-------------------------------------------------|------------|------------|---------------------------|
| 1  |           |                                                 |            |            |                           |
| 2  | Argentina | Fire, heat, and hot substances                  | 0 (0 to 0) | 0 (0 to 0) | -2.4% (-8% to 3.3%)       |
| 3  | Argentina | Foreign body in eyes                            | 0 (0 to 0) | 0 (0 to 0) | 0% (0% to 0%)             |
| 4  | Argentina | Foreign body in other body part                 | 0 (0 to 1) | 0 (0 to 0) | -6.4% (-10.4% to -3.4%)   |
| 5  | Argentina | Motor vehicle road injuries                     | 1 (0 to 1) | 1 (0 to 1) | 15.5% (5.1% to 29.5%)     |
| 6  | Argentina | Motorcyclist road injuries                      | 0 (0 to 0) | 0 (0 to 0) | 97.6% (67.3% to 142.2%)   |
| 7  | Argentina | Non-venomous animal contact                     | 0 (0 to 0) | 0 (0 to 0) | -18.2% (-21.1% to -15%)   |
| 8  | Argentina | Other exposure to mechanical forces             | 1 (0 to 1) | 1 (0 to 2) | 9.2% (0.4% to 20.8%)      |
| 9  | Argentina | Other road injuries                             | 0 (0 to 0) | 0 (0 to 0) | -2.7% (-12.2% to 8.4%)    |
| 10 | Argentina | Other transport injuries                        | 0 (0 to 0) | 0 (0 to 0) | -27.9% (-33.3% to -22.4%) |
| 11 | Argentina | Other unintentional injuries                    | 0 (0 to 1) | 0 (0 to 1) | -12.1% (-17% to -6.2%)    |
| 12 | Argentina | Pedestrian road injuries                        | 0 (0 to 0) | 0 (0 to 0) | -16.5% (-26.1% to -7.1%)  |
| 13 | Argentina | Physical violence by firearm                    | 0 (0 to 0) | 0 (0 to 0) | 64.3% (43.3% to 91%)      |
| 14 | Argentina | Physical violence by other means                | 0 (0 to 1) | 0 (0 to 1) | 1.4% (-10.2% to 14.4%)    |
| 15 | Argentina | Physical violence by sharp object               | 0 (0 to 0) | 0 (0 to 0) | 8.6% (-6.5% to 26.1%)     |
| 16 | Argentina | Poisoning by carbon monoxide                    | 0 (0 to 0) | 0 (0 to 0) | 49.1% (34.9% to 64.9%)    |
| 17 | Argentina | Poisoning by other means                        | 0 (0 to 0) | 0 (0 to 0) | -5.5% (-12.8% to 2.7%)    |
| 18 | Argentina | Pulmonary aspiration and foreign body in airway | 0 (0 to 0) | 0 (0 to 0) | -41.3% (-48.4% to -34.3%) |
| 19 | Argentina | Self-harm by firearm                            | 0 (0 to 0) | 0 (0 to 0) | 2.5% (-12.1% to 18.1%)    |
| 20 | Argentina | Self-harm by other specified means              | 0 (0 to 0) | 0 (0 to 0) | 55.8% (44.7% to 68.4%)    |
| 21 | Argentina | Unintentional firearm injuries                  | 0 (0 to 1) | 0 (0 to 1) | -32.4% (-42.2% to -23.1%) |
| 22 | Argentina | Venomous animal contact                         | 0 (0 to 0) | 0 (0 to 0) | -17.9% (-22.4% to -13.1%) |
| 23 | Armenia   | Adverse effects of medical treatment            | 0 (0 to 0) | 0 (0 to 0) | 0% (0% to 0%)             |
| 24 | Armenia   | Conflict and terrorism                          | 0 (0 to 1) | 0 (0 to 0) | NA                        |
| 25 | Armenia   | Cyclist road injuries                           | 0 (0 to 0) | 0 (0 to 0) | -16.8% (-24.9% to -7.4%)  |
| 26 | Armenia   | Drowning                                        | 0 (0 to 0) | 0 (0 to 0) | 13.9% (-2.4% to 30.2%)    |
| 27 | Armenia   | Environmental heat and cold exposure            | 0 (0 to 0) | 0 (0 to 0) | 1.5% (-7% to 12.4%)       |
| 28 | Armenia   | Executions and police conflict                  | 0 (0 to 0) | 0 (0 to 0) | NA                        |
| 29 | Armenia   | Exposure to forces of nature                    | 0 (0 to 0) | 0 (0 to 0) | NA                        |
| 30 | Armenia   | Falls                                           | 4 (3 to 5) | 3 (2 to 3) | -33.9% (-39.3% to -27.9%) |
| 31 | Armenia   | Fire, heat, and hot substances                  | 0 (0 to 0) | 0 (0 to 0) | -37.5% (-46% to -28.9%)   |
| 32 | Armenia   | Foreign body in eyes                            | 0 (0 to 0) | 0 (0 to 0) | 0% (0% to 0%)             |
| 33 | Armenia   | Foreign body in other body part                 | 0 (0 to 1) | 0 (0 to 1) | -10% (-14.5% to -5.3%)    |
| 34 | Armenia   | Motor vehicle road injuries                     | 1 (0 to 2) | 1 (0 to 1) | -18.3% (-26.6% to -9.1%)  |
| 35 | Armenia   | Motorcyclist road injuries                      | 0 (0 to 0) | 0 (0 to 0) | -42.4% (-52.5% to -31.6%) |
| 36 | Armenia   | Non-venomous animal contact                     | 0 (0 to 0) | 0 (0 to 0) | -4.9% (-9.8% to 0.6%)     |
| 37 | Armenia   | Other exposure to mechanical forces             | 1 (0 to 2) | 1 (0 to 1) | -25.2% (-33.1% to -17.1%) |
| 38 | Armenia   | Other road injuries                             | 0 (0 to 0) | 0 (0 to 0) | -21.5% (-30.8% to -10.9%) |
| 39 | Armenia   | Other transport injuries                        | 0 (0 to 0) | 0 (0 to 0) | 9.3% (5.4% to 13.9%)      |
| 40 | Armenia   | Other unintentional injuries                    | 0 (0 to 1) | 0 (0 to 0) | -29.7% (-35.6% to -22.8%) |
| 41 | Armenia   | Pedestrian road injuries                        | 0 (0 to 1) | 0 (0 to 0) | -32.8% (-40% to -24.5%)   |
| 42 | Armenia   | Physical violence by firearm                    | 0 (0 to 0) | 0 (0 to 0) | 40.2% (20.5% to 63.6%)    |
| 43 | Armenia   | Physical violence by other means                | 0 (0 to 1) | 0 (0 to 0) | -17.6% (-27% to -7%)      |
| 44 | Armenia   | Physical violence by sharp object               | 0 (0 to 0) | 0 (0 to 0) | -19.7% (-31.9% to -6.8%)  |
| 45 |           |                                                 |            |            |                           |
| 46 |           |                                                 |            |            |                           |

|    |           |                                                 |            |             |                           |
|----|-----------|-------------------------------------------------|------------|-------------|---------------------------|
| 1  |           |                                                 |            |             |                           |
| 2  | Armenia   | Poisoning by carbon monoxide                    | 0 (0 to 0) | 0 (0 to 0)  | -8.2% (-21.7% to 5.6%)    |
| 3  | Armenia   | Poisoning by other means                        | 0 (0 to 0) | 0 (0 to 0)  | -14.4% (-24.1% to -5.5%)  |
| 4  | Armenia   | Pulmonary aspiration and foreign body in airway | 0 (0 to 0) | 0 (0 to 0)  | -30.5% (-37.9% to -24.3%) |
| 5  | Armenia   | Self-harm by firearm                            | 0 (0 to 0) | 0 (0 to 0)  | 131.5% (96.6% to 171.8%)  |
| 6  | Armenia   | Self-harm by other specified means              | 0 (0 to 0) | 0 (0 to 0)  | 84.1% (71.1% to 99.8%)    |
| 7  | Armenia   | Unintentional firearm injuries                  | 0 (0 to 0) | 0 (0 to 0)  | -46.4% (-55.6% to -37.7%) |
| 8  | Armenia   | Venomous animal contact                         | 0 (0 to 0) | 0 (0 to 0)  | -17.8% (-24.1% to -13.1%) |
| 9  | Australia | Adverse effects of medical treatment            | 0 (0 to 0) | 0 (0 to 0)  | 0% (0% to 0%)             |
| 10 | Australia | Conflict and terrorism                          | 0 (0 to 0) | 0 (0 to 0)  | NA                        |
| 11 | Australia | Cyclist road injuries                           | 0 (0 to 0) | 0 (0 to 0)  | -15% (-26% to -2.3%)      |
| 12 | Australia | Drowning                                        | 0 (0 to 0) | 0 (0 to 0)  | 36.3% (23.6% to 50.6%)    |
| 13 | Australia | Environmental heat and cold exposure            | 0 (0 to 0) | 0 (0 to 0)  | -18.2% (-24.3% to -12.6%) |
| 14 | Australia | Executions and police conflict                  | 0 (0 to 0) | 0 (0 to 0)  | NA                        |
| 15 | Australia | Exposure to forces of nature                    | 0 (0 to 0) | 0 (0 to 0)  | NA                        |
| 16 | Australia | Falls                                           | 6 (4 to 8) | 8 (6 to 11) | 33.2% (27.2% to 39.8%)    |
| 17 | Australia | Fire, heat, and hot substances                  | 0 (0 to 0) | 0 (0 to 0)  | -6.7% (-11.9% to -1%)     |
| 18 | Australia | Foreign body in eyes                            | 0 (0 to 0) | 0 (0 to 0)  | 0% (0% to 0%)             |
| 19 | Australia | Foreign body in other body part                 | 1 (0 to 1) | 1 (0 to 1)  | 1.6% (-2.5% to 5.7%)      |
| 20 | Australia | Motor vehicle road injuries                     | 1 (0 to 1) | 0 (0 to 1)  | -36.5% (-43.4% to -28.9%) |
| 21 | Australia | Motorcyclist road injuries                      | 0 (0 to 0) | 0 (0 to 0)  | -15% (-31.9% to 2.3%)     |
| 22 | Australia | Non-venomous animal contact                     | 0 (0 to 1) | 0 (0 to 1)  | -13% (-16.2% to -9.5%)    |
| 23 | Australia | Other exposure to mechanical forces             | 2 (1 to 4) | 2 (1 to 4)  | -7.7% (-14.9% to -1.9%)   |
| 24 | Australia | Other road injuries                             | 0 (0 to 0) | 0 (0 to 0)  | -3.4% (-15.4% to 11.2%)   |
| 25 | Australia | Other transport injuries                        | 0 (0 to 0) | 0 (0 to 0)  | -13.2% (-18.8% to -7.9%)  |
| 26 | Australia | Other unintentional injuries                    | 1 (0 to 1) | 1 (0 to 1)  | -11.6% (-16.8% to -7%)    |
| 27 | Australia | Pedestrian road injuries                        | 0 (0 to 0) | 0 (0 to 0)  | -34.8% (-44.7% to -23.9%) |
| 28 | Australia | Physical violence by firearm                    | 0 (0 to 0) | 0 (0 to 0)  | 24.1% (13% to 37.6%)      |
| 29 | Australia | Physical violence by other means                | 1 (0 to 1) | 1 (0 to 1)  | -6.3% (-13.4% to 0.9%)    |
| 30 | Australia | Physical violence by sharp object               | 0 (0 to 0) | 0 (0 to 0)  | -18.9% (-28.1% to -9.9%)  |
| 31 | Australia | Poisoning by carbon monoxide                    | 0 (0 to 0) | 0 (0 to 0)  | 9.4% (1.5% to 17.4%)      |
| 32 | Australia | Poisoning by other means                        | 0 (0 to 0) | 0 (0 to 0)  | -1.8% (-8.5% to 4.4%)     |
| 33 | Australia | Pulmonary aspiration and foreign body in airway | 0 (0 to 0) | 0 (0 to 0)  | -8.2% (-12.5% to -3.5%)   |
| 34 | Australia | Self-harm by firearm                            | 0 (0 to 0) | 0 (0 to 0)  | -43.8% (-57.2% to -32.3%) |
| 35 | Australia | Self-harm by other specified means              | 0 (0 to 1) | 0 (0 to 1)  | 1.7% (-4% to 7.7%)        |
| 36 | Australia | Unintentional firearm injuries                  | 0 (0 to 0) | 0 (0 to 0)  | -8.9% (-19.6% to 1.9%)    |
| 37 | Australia | Venomous animal contact                         | 0 (0 to 0) | 0 (0 to 0)  | -15.8% (-20.9% to -10.9%) |
| 38 | Austria   | Adverse effects of medical treatment            | 0 (0 to 0) | 0 (0 to 0)  | 0% (0% to 0%)             |
| 39 | Austria   | Conflict and terrorism                          | 0 (0 to 0) | 0 (0 to 0)  | NA                        |
| 40 | Austria   | Cyclist road injuries                           | 0 (0 to 0) | 0 (0 to 0)  | -27.5% (-36.4% to -16.7%) |
| 41 | Austria   | Drowning                                        | 0 (0 to 0) | 0 (0 to 0)  | 39.9% (24.2% to 55.1%)    |
| 42 | Austria   | Environmental heat and cold exposure            | 0 (0 to 0) | 0 (0 to 0)  | 4.2% (-0.9% to 9.7%)      |
| 43 | Austria   | Executions and police conflict                  | 0 (0 to 0) | 0 (0 to 0)  | NA                        |
| 44 | Austria   | Exposure to forces of nature                    | 0 (0 to 0) | 0 (0 to 0)  | NA                        |
| 45 |           |                                                 |            |             |                           |
| 46 |           |                                                 |            |             |                           |

|    |            |                                                 |             |            |                           |
|----|------------|-------------------------------------------------|-------------|------------|---------------------------|
| 1  |            |                                                 |             |            |                           |
| 2  | Austria    | Falls                                           | 7 (5 to 10) | 7 (5 to 9) | -3.3% (-7.9% to 1.3%)     |
| 3  | Austria    | Fire, heat, and hot substances                  | 0 (0 to 0)  | 0 (0 to 0) | -6% (-11.2% to -0.5%)     |
| 4  | Austria    | Foreign body in eyes                            | 0 (0 to 0)  | 0 (0 to 0) | 0% (0% to 0%)             |
| 5  | Austria    | Foreign body in other body part                 | 0 (0 to 0)  | 0 (0 to 0) | 2.3% (-1.1% to 5.6%)      |
| 6  | Austria    | Motor vehicle road injuries                     | 1 (0 to 1)  | 0 (0 to 1) | -54.7% (-61.5% to -47.6%) |
| 7  | Austria    | Motorcyclist road injuries                      | 0 (0 to 0)  | 0 (0 to 0) | -28.7% (-41.5% to -13.2%) |
| 8  | Austria    | Non-venomous animal contact                     | 0 (0 to 0)  | 0 (0 to 0) | -12.8% (-16.7% to -8.3%)  |
| 9  | Austria    | Other exposure to mechanical forces             | 1 (0 to 1)  | 1 (0 to 1) | -33.3% (-40.7% to -26.4%) |
| 10 | Austria    | Other road injuries                             | 0 (0 to 0)  | 0 (0 to 0) | -14.4% (-26.2% to -0.5%)  |
| 11 | Austria    | Other transport injuries                        | 0 (0 to 0)  | 0 (0 to 0) | -6.3% (-11.4% to -1%)     |
| 12 | Austria    | Other unintentional injuries                    | 0 (0 to 0)  | 0 (0 to 0) | -4.3% (-9.2% to 0%)       |
| 13 | Austria    | Pedestrian road injuries                        | 0 (0 to 0)  | 0 (0 to 0) | -49.2% (-58.2% to -39.3%) |
| 14 | Austria    | Physical violence by firearm                    | 0 (0 to 0)  | 0 (0 to 0) | 33% (22.2% to 47.3%)      |
| 15 | Austria    | Physical violence by other means                | 0 (0 to 0)  | 0 (0 to 0) | 0.5% (-7.2% to 8.1%)      |
| 16 | Austria    | Physical violence by sharp object               | 0 (0 to 0)  | 0 (0 to 0) | -19.1% (-27.7% to -11.2%) |
| 17 | Austria    | Poisoning by carbon monoxide                    | 0 (0 to 0)  | 0 (0 to 0) | 13.3% (5.8% to 21.9%)     |
| 18 | Austria    | Poisoning by other means                        | 0 (0 to 0)  | 0 (0 to 0) | -3.6% (-9% to 2.6%)       |
| 19 | Austria    | Pulmonary aspiration and foreign body in airway | 0 (0 to 0)  | 0 (0 to 0) | -6.8% (-14.3% to 1.4%)    |
| 20 | Austria    | Self-harm by firearm                            | 0 (0 to 0)  | 0 (0 to 0) | -28.6% (-38.5% to -16.9%) |
| 21 | Austria    | Self-harm by other specified means              | 0 (0 to 1)  | 0 (0 to 1) | -34.8% (-38.2% to -31%)   |
| 22 | Austria    | Unintentional firearm injuries                  | 0 (0 to 0)  | 0 (0 to 0) | 3.7% (-6.5% to 15.4%)     |
| 23 | Austria    | Venomous animal contact                         | 0 (0 to 0)  | 0 (0 to 0) | -11.5% (-16.9% to -4.6%)  |
| 24 | Azerbaijan | Adverse effects of medical treatment            | 0 (0 to 0)  | 0 (0 to 0) | 0% (0% to 0%)             |
| 25 | Azerbaijan | Conflict and terrorism                          | 0 (0 to 1)  | 0 (0 to 0) | NA                        |
| 26 | Azerbaijan | Cyclist road injuries                           | 0 (0 to 0)  | 0 (0 to 0) | -6.9% (-16.6% to 3.8%)    |
| 27 | Azerbaijan | Drowning                                        | 0 (0 to 0)  | 0 (0 to 0) | 30% (13.7% to 47.3%)      |
| 28 | Azerbaijan | Environmental heat and cold exposure            | 0 (0 to 0)  | 0 (0 to 0) | -9.8% (-15.8% to -3.1%)   |
| 29 | Azerbaijan | Executions and police conflict                  | 0 (0 to 0)  | 0 (0 to 0) | NA                        |
| 30 | Azerbaijan | Exposure to forces of nature                    | 0 (0 to 0)  | 0 (0 to 0) | NA                        |
| 31 | Azerbaijan | Falls                                           | 2 (2 to 3)  | 2 (2 to 3) | 8.8% (3.3% to 14.4%)      |
| 32 | Azerbaijan | Fire, heat, and hot substances                  | 0 (0 to 0)  | 0 (0 to 0) | -19.7% (-25.2% to -14.2%) |
| 33 | Azerbaijan | Foreign body in eyes                            | 0 (0 to 0)  | 0 (0 to 0) | 0% (0% to 0%)             |
| 34 | Azerbaijan | Foreign body in other body part                 | 0 (0 to 0)  | 0 (0 to 0) | 1.3% (-3.4% to 6.6%)      |
| 35 | Azerbaijan | Motor vehicle road injuries                     | 1 (0 to 2)  | 1 (0 to 1) | -23.1% (-31.1% to -15.2%) |
| 36 | Azerbaijan | Motorcyclist road injuries                      | 0 (0 to 0)  | 0 (0 to 0) | -46.2% (-54.1% to -37.4%) |
| 37 | Azerbaijan | Non-venomous animal contact                     | 0 (0 to 0)  | 0 (0 to 0) | -9.6% (-13.4% to -5.4%)   |
| 38 | Azerbaijan | Other exposure to mechanical forces             | 1 (0 to 1)  | 1 (0 to 1) | 0.1% (-5.8% to 6.8%)      |
| 39 | Azerbaijan | Other road injuries                             | 0 (0 to 0)  | 0 (0 to 0) | 0.8% (-10.4% to 13.4%)    |
| 40 | Azerbaijan | Other transport injuries                        | 0 (0 to 0)  | 0 (0 to 0) | 10.4% (6% to 15.7%)       |
| 41 | Azerbaijan | Other unintentional injuries                    | 0 (0 to 0)  | 0 (0 to 0) | 2% (-3% to 6.5%)          |
| 42 | Azerbaijan | Pedestrian road injuries                        | 0 (0 to 0)  | 0 (0 to 0) | -20% (-29% to -10.4%)     |
| 43 | Azerbaijan | Physical violence by firearm                    | 0 (0 to 0)  | 0 (0 to 0) | -26% (-42.1% to -6.6%)    |
| 44 | Azerbaijan | Physical violence by other means                | 0 (0 to 1)  | 0 (0 to 0) | -54.8% (-61% to -47.8%)   |
| 45 |            |                                                 |             |            |                           |
| 46 |            |                                                 |             |            |                           |

|    |            |                                                 |            |            |                           |
|----|------------|-------------------------------------------------|------------|------------|---------------------------|
| 1  |            |                                                 |            |            |                           |
| 2  | Azerbaijan | Physical violence by sharp object               | 0 (0 to 0) | 0 (0 to 0) | -55.2% (-62.5% to -47%)   |
| 3  | Azerbaijan | Poisoning by carbon monoxide                    | 0 (0 to 0) | 0 (0 to 0) | 22.1% (9.6% to 35.8%)     |
| 4  | Azerbaijan | Poisoning by other means                        | 0 (0 to 0) | 0 (0 to 0) | -5.4% (-14.2% to 3%)      |
| 5  | Azerbaijan | Pulmonary aspiration and foreign body in airway | 0 (0 to 0) | 0 (0 to 0) | -10.8% (-17.5% to -3.6%)  |
| 6  | Azerbaijan | Self-harm by firearm                            | 0 (0 to 0) | 0 (0 to 0) | 34.4% (19.7% to 51.3%)    |
| 7  | Azerbaijan | Self-harm by other specified means              | 0 (0 to 0) | 0 (0 to 0) | 24% (17.5% to 31.3%)      |
| 8  | Azerbaijan | Unintentional firearm injuries                  | 0 (0 to 0) | 0 (0 to 0) | 3% (-5.3% to 11.4%)       |
| 9  | Bahamas    | Venomous animal contact                         | 0 (0 to 0) | 0 (0 to 0) | -9.2% (-14.3% to -3.5%)   |
| 10 | Bahamas    | Adverse effects of medical treatment            | 0 (0 to 0) | 0 (0 to 0) | 0% (0% to 0%)             |
| 11 | Bahamas    | Conflict and terrorism                          | 0 (0 to 0) | 0 (0 to 0) | NA                        |
| 12 | Bahamas    | Cyclist road injuries                           | 0 (0 to 1) | 0 (0 to 0) | -25.2% (-33.7% to -16%)   |
| 13 | Bahamas    | Drowning                                        | 0 (0 to 0) | 0 (0 to 0) | 17.6% (6.2% to 29.1%)     |
| 14 | Bahamas    | Environmental heat and cold exposure            | 0 (0 to 0) | 0 (0 to 0) | 0.5% (-4.1% to 4.3%)      |
| 15 | Bahamas    | Executions and police conflict                  | 0 (0 to 0) | 0 (0 to 0) | NA                        |
| 16 | Bahamas    | Exposure to forces of nature                    | 0 (0 to 0) | 0 (0 to 0) | NA                        |
| 17 | Bahamas    | Falls                                           | 1 (1 to 2) | 2 (1 to 2) | 36.9% (31.7% to 42.4%)    |
| 18 | Bahamas    | Fire, heat, and hot substances                  | 0 (0 to 0) | 0 (0 to 0) | -19% (-23.6% to -13.6%)   |
| 19 | Bahamas    | Foreign body in eyes                            | 0 (0 to 0) | 0 (0 to 0) | 0% (0% to 0%)             |
| 20 | Bahamas    | Foreign body in other body part                 | 0 (0 to 0) | 0 (0 to 0) | -5.6% (-9.3% to -1%)      |
| 21 | Bahamas    | Motor vehicle road injuries                     | 1 (0 to 1) | 1 (0 to 1) | -26.8% (-34% to -18.5%)   |
| 22 | Bahamas    | Motorcyclist road injuries                      | 0 (0 to 1) | 0 (0 to 1) | 13.8% (-0.5% to 32%)      |
| 23 | Bahamas    | Non-venomous animal contact                     | 0 (0 to 0) | 0 (0 to 0) | 7.4% (1.2% to 15%)        |
| 24 | Bahamas    | Other exposure to mechanical forces             | 0 (0 to 0) | 0 (0 to 0) | 16.5% (9.8% to 23%)       |
| 25 | Bahamas    | Other road injuries                             | 0 (0 to 0) | 0 (0 to 0) | -20.6% (-29.1% to -10.2%) |
| 26 | Bahamas    | Other transport injuries                        | 0 (0 to 0) | 0 (0 to 0) | 23.6% (17% to 30.9%)      |
| 27 | Bahamas    | Other unintentional injuries                    | 0 (0 to 0) | 0 (0 to 0) | -5.4% (-10.1% to -0.7%)   |
| 28 | Bahamas    | Pedestrian road injuries                        | 0 (0 to 0) | 0 (0 to 0) | -34.5% (-41.5% to -26.4%) |
| 29 | Bahamas    | Physical violence by firearm                    | 0 (0 to 0) | 0 (0 to 1) | 137% (99.1% to 191.4%)    |
| 30 | Bahamas    | Physical violence by other means                | 0 (0 to 0) | 0 (0 to 0) | 3.9% (-7.3% to 14.7%)     |
| 31 | Bahamas    | Physical violence by sharp object               | 0 (0 to 0) | 0 (0 to 0) | 16.3% (-0.2% to 33.9%)    |
| 32 | Bahamas    | Poisoning by carbon monoxide                    | 0 (0 to 0) | 0 (0 to 0) | 12.2% (-0.2% to 24.6%)    |
| 33 | Bahamas    | Poisoning by other means                        | 0 (0 to 0) | 0 (0 to 0) | -5.1% (-13.4% to 4%)      |
| 34 | Bahamas    | Pulmonary aspiration and foreign body in airway | 0 (0 to 0) | 0 (0 to 0) | -24.5% (-31.5% to -17.1%) |
| 35 | Bahamas    | Self-harm by firearm                            | 0 (0 to 0) | 0 (0 to 0) | 0.8% (-9.1% to 9.9%)      |
| 36 | Bahamas    | Self-harm by other specified means              | 0 (0 to 0) | 0 (0 to 0) | 7.6% (1.2% to 15.7%)      |
| 37 | Bahamas    | Unintentional firearm injuries                  | 0 (0 to 0) | 0 (0 to 0) | 18.4% (11.4% to 26%)      |
| 38 | Bahamas    | Venomous animal contact                         | 0 (0 to 0) | 0 (0 to 0) | 4.6% (-1.9% to 12%)       |
| 39 | Bahrain    | Adverse effects of medical treatment            | 0 (0 to 0) | 0 (0 to 0) | 0% (0% to 0%)             |
| 40 | Bahrain    | Conflict and terrorism                          | 0 (0 to 0) | 0 (0 to 0) | NA                        |
| 41 | Bahrain    | Cyclist road injuries                           | 0 (0 to 0) | 0 (0 to 0) | -6% (-15.4% to 5%)        |
| 42 | Bahrain    | Drowning                                        | 0 (0 to 0) | 0 (0 to 0) | 105.5% (72% to 142.5%)    |
| 43 | Bahrain    | Environmental heat and cold exposure            | 0 (0 to 0) | 0 (0 to 0) | 2.9% (-2% to 8%)          |
| 44 | Bahrain    | Executions and police conflict                  | 0 (0 to 0) | 0 (0 to 0) | NA                        |
| 45 |            |                                                 |            |            |                           |
| 46 |            |                                                 |            |            |                           |

|    |            |                                                 |            |            |                           |
|----|------------|-------------------------------------------------|------------|------------|---------------------------|
| 1  |            |                                                 |            |            |                           |
| 2  | Bahrain    | Exposure to forces of nature                    | 0 (0 to 0) | 0 (0 to 0) | NA                        |
| 3  | Bahrain    | Falls                                           | 1 (1 to 2) | 2 (1 to 3) | 40.6% (34.9% to 46.4%)    |
| 4  | Bahrain    | Fire, heat, and hot substances                  | 0 (0 to 0) | 0 (0 to 0) | -3.9% (-9.9% to 2%)       |
| 5  | Bahrain    | Foreign body in eyes                            | 0 (0 to 0) | 0 (0 to 0) | 0% (0% to 0%)             |
| 6  | Bahrain    | Foreign body in other body part                 | 0 (0 to 0) | 0 (0 to 0) | 1.6% (-2% to 5.2%)        |
| 7  | Bahrain    | Motor vehicle road injuries                     | 1 (1 to 2) | 1 (0 to 1) | -39.5% (-45.5% to -33.2%) |
| 8  | Bahrain    | Motorcyclist road injuries                      | 0 (0 to 0) | 0 (0 to 0) | 3.4% (-9.1% to 16.9%)     |
| 9  | Bahrain    | Non-venomous animal contact                     | 0 (0 to 0) | 0 (0 to 0) | 0.5% (-4.7% to 4.9%)      |
| 10 | Bahrain    | Other exposure to mechanical forces             | 0 (0 to 0) | 0 (0 to 0) | 9.6% (3.5% to 15.6%)      |
| 11 | Bahrain    | Other road injuries                             | 0 (0 to 0) | 0 (0 to 0) | -5.8% (-16.2% to 6.2%)    |
| 12 | Bahrain    | Other transport injuries                        | 0 (0 to 0) | 0 (0 to 0) | 7.4% (2.4% to 13.2%)      |
| 13 | Bahrain    | Other unintentional injuries                    | 0 (0 to 0) | 0 (0 to 0) | -1% (-6% to 3.7%)         |
| 14 | Bahrain    | Pedestrian road injuries                        | 0 (0 to 0) | 0 (0 to 0) | -15.2% (-24% to -5.1%)    |
| 15 | Bahrain    | Physical violence by firearm                    | 0 (0 to 0) | 0 (0 to 0) | 110.5% (84.2% to 145.5%)  |
| 16 | Bahrain    | Physical violence by other means                | 0 (0 to 0) | 0 (0 to 0) | -14.3% (-21.7% to -8%)    |
| 17 | Bahrain    | Physical violence by sharp object               | 0 (0 to 0) | 0 (0 to 0) | -12.5% (-21% to -3.7%)    |
| 18 | Bahrain    | Poisoning by carbon monoxide                    | 0 (0 to 0) | 0 (0 to 0) | 45.4% (31.2% to 61.8%)    |
| 19 | Bahrain    | Poisoning by other means                        | 0 (0 to 0) | 0 (0 to 0) | -6.5% (-13.1% to 1%)      |
| 20 | Bahrain    | Pulmonary aspiration and foreign body in airway | 0 (0 to 0) | 0 (0 to 0) | -10% (-18.4% to -2.5%)    |
| 21 | Bahrain    | Self-harm by firearm                            | 0 (0 to 0) | 0 (0 to 0) | 19.8% (6.9% to 34.1%)     |
| 22 | Bahrain    | Self-harm by other specified means              | 0 (0 to 0) | 0 (0 to 0) | 33.6% (25.7% to 42.3%)    |
| 23 | Bahrain    | Unintentional firearm injuries                  | 0 (0 to 0) | 0 (0 to 0) | 10.6% (3% to 19.1%)       |
| 24 | Bahrain    | Venomous animal contact                         | 0 (0 to 0) | 0 (0 to 0) | 3.2% (-3.3% to 10.6%)     |
| 25 | Bangladesh | Adverse effects of medical treatment            | 0 (0 to 0) | 0 (0 to 0) | 0% (0% to 0%)             |
| 26 | Bangladesh | Conflict and terrorism                          | 0 (0 to 0) | 0 (0 to 0) | NA                        |
| 27 | Bangladesh | Cyclist road injuries                           | 1 (1 to 2) | 1 (1 to 2) | -5.1% (-12.1% to 2%)      |
| 28 | Bangladesh | Drowning                                        | 0 (0 to 0) | 0 (0 to 0) | -3.7% (-15.4% to 7.3%)    |
| 29 | Bangladesh | Environmental heat and cold exposure            | 0 (0 to 0) | 0 (0 to 0) | 8.9% (3.4% to 15.4%)      |
| 30 | Bangladesh | Executions and police conflict                  | 0 (0 to 0) | 0 (0 to 0) | NA                        |
| 31 | Bangladesh | Exposure to forces of nature                    | 0 (0 to 1) | 0 (0 to 0) | NA                        |
| 32 | Bangladesh | Falls                                           | 1 (1 to 1) | 1 (1 to 2) | 64.1% (57% to 71.7%)      |
| 33 | Bangladesh | Fire, heat, and hot substances                  | 0 (0 to 0) | 0 (0 to 0) | -7.9% (-18% to 1.3%)      |
| 34 | Bangladesh | Foreign body in eyes                            | 0 (0 to 0) | 0 (0 to 0) | 0% (0% to 0%)             |
| 35 | Bangladesh | Foreign body in other body part                 | 0 (0 to 0) | 0 (0 to 0) | -10.6% (-14.5% to -6.1%)  |
| 36 | Bangladesh | Motor vehicle road injuries                     | 0 (0 to 1) | 1 (0 to 1) | 12.4% (3% to 22.8%)       |
| 37 | Bangladesh | Motorcyclist road injuries                      | 0 (0 to 1) | 0 (0 to 1) | 22.2% (12.3% to 33.5%)    |
| 38 | Bangladesh | Non-venomous animal contact                     | 0 (0 to 0) | 0 (0 to 0) | -0.7% (-7% to 5.6%)       |
| 39 | Bangladesh | Other exposure to mechanical forces             | 0 (0 to 0) | 0 (0 to 0) | 30.1% (21.7% to 39%)      |
| 40 | Bangladesh | Other road injuries                             | 0 (0 to 0) | 0 (0 to 0) | 8.2% (-1.5% to 19.1%)     |
| 41 | Bangladesh | Other transport injuries                        | 0 (0 to 0) | 0 (0 to 0) | 5.4% (-0.2% to 11.1%)     |
| 42 | Bangladesh | Other unintentional injuries                    | 0 (0 to 0) | 0 (0 to 0) | 3.8% (-1.9% to 9.3%)      |
| 43 | Bangladesh | Pedestrian road injuries                        | 0 (0 to 1) | 0 (0 to 1) | 7.5% (-1.5% to 17.5%)     |
| 44 | Bangladesh | Physical violence by firearm                    | 0 (0 to 0) | 0 (0 to 0) | 44.1% (23.1% to 69.3%)    |
| 45 |            |                                                 |            |            |                           |
| 46 |            |                                                 |            |            |                           |

|    |            |                                                 |            |            |                           |
|----|------------|-------------------------------------------------|------------|------------|---------------------------|
| 1  |            |                                                 |            |            |                           |
| 2  | Bangladesh | Physical violence by other means                | 0 (0 to 0) | 0 (0 to 0) | -1% (-7.4% to 5.2%)       |
| 3  | Bangladesh | Physical violence by sharp object               | 0 (0 to 0) | 0 (0 to 0) | -7.7% (-16.1% to 1%)      |
| 4  | Bangladesh | Poisoning by carbon monoxide                    | 0 (0 to 0) | 0 (0 to 0) | 14.4% (0.9% to 29.7%)     |
| 5  | Bangladesh | Poisoning by other means                        | 0 (0 to 0) | 0 (0 to 0) | -11.4% (-18.1% to -4.7%)  |
| 6  | Bangladesh | Pulmonary aspiration and foreign body in airway | 0 (0 to 0) | 0 (0 to 0) | -32.3% (-42.1% to -21.7%) |
| 7  | Bangladesh | Self-harm by firearm                            | 0 (0 to 0) | 0 (0 to 0) | -8.6% (-22.3% to 7.7%)    |
| 8  | Bangladesh | Self-harm by other specified means              | 0 (0 to 0) | 0 (0 to 0) | -39.6% (-45.3% to -34%)   |
| 9  | Bangladesh | Unintentional firearm injuries                  | 0 (0 to 0) | 0 (0 to 0) | 7.2% (-2.8% to 15.6%)     |
| 10 | Barbados   | Venomous animal contact                         | 0 (0 to 0) | 0 (0 to 0) | 8.5% (-1.7% to 18.9%)     |
| 11 | Barbados   | Adverse effects of medical treatment            | 0 (0 to 0) | 0 (0 to 0) | 0% (0% to 0%)             |
| 12 | Barbados   | Conflict and terrorism                          | 0 (0 to 0) | 0 (0 to 0) | NA                        |
| 13 | Barbados   | Cyclist road injuries                           | 0 (0 to 0) | 0 (0 to 0) | -11.1% (-20.2% to -1.4%)  |
| 14 | Barbados   | Drowning                                        | 0 (0 to 0) | 0 (0 to 0) | 28.9% (14% to 43.1%)      |
| 15 | Barbados   | Environmental heat and cold exposure            | 0 (0 to 0) | 0 (0 to 1) | 6.4% (1.5% to 11.1%)      |
| 16 | Barbados   | Executions and police conflict                  | 0 (0 to 0) | 0 (0 to 0) | NA                        |
| 17 | Barbados   | Exposure to forces of nature                    | 0 (0 to 0) | 0 (0 to 0) | NA                        |
| 18 | Barbados   | Falls                                           | 1 (1 to 1) | 2 (1 to 2) | 48.7% (43% to 54.1%)      |
| 19 | Barbados   | Fire, heat, and hot substances                  | 0 (0 to 0) | 0 (0 to 0) | -9.5% (-15.3% to -3.6%)   |
| 20 | Barbados   | Foreign body in eyes                            | 0 (0 to 0) | 0 (0 to 0) | 0% (0% to 0%)             |
| 21 | Barbados   | Foreign body in other body part                 | 0 (0 to 0) | 0 (0 to 0) | -1.6% (-5.3% to 1.6%)     |
| 22 | Barbados   | Motor vehicle road injuries                     | 1 (0 to 1) | 0 (0 to 1) | -21.6% (-29.3% to -13.7%) |
| 23 | Barbados   | Motorcyclist road injuries                      | 0 (0 to 0) | 0 (0 to 0) | -5.5% (-18.1% to 7.5%)    |
| 24 | Barbados   | Non-venomous animal contact                     | 0 (0 to 0) | 0 (0 to 0) | -3.5% (-7.9% to 1.3%)     |
| 25 | Barbados   | Other exposure to mechanical forces             | 0 (0 to 0) | 0 (0 to 1) | 28.4% (20% to 39.2%)      |
| 26 | Barbados   | Other road injuries                             | 0 (0 to 0) | 0 (0 to 0) | -9.3% (-18.9% to 2.1%)    |
| 27 | Barbados   | Other transport injuries                        | 0 (0 to 0) | 0 (0 to 0) | -0.8% (-5.1% to 3.4%)     |
| 28 | Barbados   | Other unintentional injuries                    | 0 (0 to 0) | 0 (0 to 0) | -1.3% (-5.9% to 3.8%)     |
| 29 | Barbados   | Pedestrian road injuries                        | 0 (0 to 0) | 0 (0 to 0) | -25.8% (-33.8% to -16.9%) |
| 30 | Barbados   | Physical violence by firearm                    | 0 (0 to 0) | 0 (0 to 0) | 76.1% (51.9% to 108.6%)   |
| 31 | Barbados   | Physical violence by other means                | 0 (0 to 0) | 0 (0 to 0) | -1.7% (-12% to 8%)        |
| 32 | Barbados   | Physical violence by sharp object               | 0 (0 to 0) | 0 (0 to 0) | 3.7% (-9% to 17.7%)       |
| 33 | Barbados   | Poisoning by carbon monoxide                    | 0 (0 to 0) | 0 (0 to 0) | 22% (6.4% to 37.5%)       |
| 34 | Barbados   | Poisoning by other means                        | 0 (0 to 0) | 0 (0 to 0) | -12.3% (-21.8% to -3.9%)  |
| 35 | Barbados   | Pulmonary aspiration and foreign body in airway | 0 (0 to 0) | 0 (0 to 0) | -11.7% (-18.8% to -4%)    |
| 36 | Barbados   | Self-harm by firearm                            | 0 (0 to 0) | 0 (0 to 0) | 6.1% (-4.3% to 18.8%)     |
| 37 | Barbados   | Self-harm by other specified means              | 0 (0 to 0) | 0 (0 to 0) | -11% (-18.8% to -3.8%)    |
| 38 | Barbados   | Unintentional firearm injuries                  | 0 (0 to 0) | 0 (0 to 0) | -3.8% (-14.7% to 5%)      |
| 39 | Barbados   | Venomous animal contact                         | 0 (0 to 0) | 0 (0 to 0) | -3.4% (-8.2% to 1.8%)     |
| 40 | Belarus    | Adverse effects of medical treatment            | 0 (0 to 0) | 0 (0 to 0) | 0% (0% to 0%)             |
| 41 | Belarus    | Conflict and terrorism                          | 0 (0 to 0) | 0 (0 to 0) | NA                        |
| 42 | Belarus    | Cyclist road injuries                           | 1 (0 to 1) | 0 (0 to 1) | -27% (-36.2% to -17.1%)   |
| 43 | Belarus    | Drowning                                        | 0 (0 to 0) | 0 (0 to 0) | 10.3% (-1.9% to 21.8%)    |
| 44 | Belarus    | Environmental heat and cold exposure            | 0 (0 to 1) | 0 (0 to 0) | -9.7% (-18.9% to 2.8%)    |
| 45 |            |                                                 |            |            |                           |
| 46 |            |                                                 |            |            |                           |

|    |         |                                                 |            |             |                           |
|----|---------|-------------------------------------------------|------------|-------------|---------------------------|
| 1  |         |                                                 |            |             |                           |
| 2  | Belarus | Executions and police conflict                  | 0 (0 to 0) | 0 (0 to 0)  | NA                        |
| 3  | Belarus | Exposure to forces of nature                    | 0 (0 to 0) | 0 (0 to 0)  | NA                        |
| 4  | Belarus | Falls                                           | 6 (4 to 7) | 7 (5 to 9)  | 21.5% (16.5% to 27.5%)    |
| 5  | Belarus | Fire, heat, and hot substances                  | 0 (0 to 0) | 0 (0 to 0)  | -3.6% (-9.7% to 2%)       |
| 6  | Belarus | Foreign body in eyes                            | 0 (0 to 0) | 0 (0 to 0)  | 0% (0% to 0%)             |
| 7  | Belarus | Foreign body in other body part                 | 0 (0 to 0) | 0 (0 to 0)  | 0% (-4.8% to 4.4%)        |
| 8  | Belarus | Motor vehicle road injuries                     | 2 (1 to 4) | 2 (1 to 3)  | -30.7% (-40.4% to -21%)   |
| 9  | Belarus | Motorcyclist road injuries                      | 0 (0 to 1) | 0 (0 to 0)  | -40.7% (-50.8% to -30.1%) |
| 10 | Belarus | Non-venomous animal contact                     | 0 (0 to 0) | 0 (0 to 0)  | -10.3% (-14.1% to -6.3%)  |
| 11 | Belarus | Other exposure to mechanical forces             | 1 (0 to 2) | 1 (0 to 2)  | -5.3% (-10.8% to 0.2%)    |
| 12 | Belarus | Other road injuries                             | 0 (0 to 0) | 0 (0 to 0)  | -18.4% (-28.8% to -7.8%)  |
| 13 | Belarus | Other transport injuries                        | 0 (0 to 0) | 0 (0 to 0)  | 3.4% (-0.6% to 7.2%)      |
| 14 | Belarus | Other unintentional injuries                    | 0 (0 to 0) | 0 (0 to 0)  | -8.6% (-14% to -3.4%)     |
| 15 | Belarus | Pedestrian road injuries                        | 1 (0 to 1) | 0 (0 to 1)  | -53.2% (-59.8% to -46.4%) |
| 16 | Belarus | Physical violence by firearm                    | 0 (0 to 0) | 0 (0 to 0)  | 52% (29.2% to 82.3%)      |
| 17 | Belarus | Physical violence by other means                | 0 (0 to 1) | 0 (0 to 1)  | -18.3% (-26.5% to -7%)    |
| 18 | Belarus | Physical violence by sharp object               | 0 (0 to 0) | 0 (0 to 0)  | -32.9% (-42.7% to -21.9%) |
| 19 | Belarus | Poisoning by carbon monoxide                    | 0 (0 to 0) | 0 (0 to 0)  | -14.1% (-25.9% to -1.1%)  |
| 20 | Belarus | Poisoning by other means                        | 0 (0 to 0) | 0 (0 to 0)  | -7.6% (-17.5% to 2.1%)    |
| 21 | Belarus | Pulmonary aspiration and foreign body in airway | 0 (0 to 0) | 0 (0 to 0)  | -12.8% (-18.9% to -6%)    |
| 22 | Belarus | Self-harm by firearm                            | 0 (0 to 0) | 0 (0 to 0)  | 8% (-8.3% to 26.2%)       |
| 23 | Belarus | Self-harm by other specified means              | 0 (0 to 1) | 0 (0 to 1)  | -3.1% (-8.8% to 3.5%)     |
| 24 | Belarus | Unintentional firearm injuries                  | 0 (0 to 0) | 0 (0 to 0)  | 3.2% (-6.5% to 13.1%)     |
| 25 | Belarus | Venomous animal contact                         | 0 (0 to 0) | 0 (0 to 0)  | -10.4% (-16.2% to -4.7%)  |
| 26 | Belgium | Adverse effects of medical treatment            | 0 (0 to 0) | 0 (0 to 0)  | 0% (0% to 0%)             |
| 27 | Belgium | Conflict and terrorism                          | 0 (0 to 0) | 0 (0 to 0)  | NA                        |
| 28 | Belgium | Cyclist road injuries                           | 0 (0 to 0) | 0 (0 to 0)  | -21% (-32.2% to -8.4%)    |
| 29 | Belgium | Drowning                                        | 0 (0 to 0) | 0 (0 to 0)  | 51.1% (38.1% to 66.5%)    |
| 30 | Belgium | Environmental heat and cold exposure            | 0 (0 to 0) | 0 (0 to 0)  | -0.8% (-5.4% to 4.1%)     |
| 31 | Belgium | Executions and police conflict                  | 0 (0 to 0) | 0 (0 to 0)  | NA                        |
| 32 | Belgium | Exposure to forces of nature                    | 0 (0 to 0) | 0 (0 to 0)  | NA                        |
| 33 | Belgium | Falls                                           | 7 (5 to 9) | 9 (6 to 12) | 33.4% (29.1% to 38.3%)    |
| 34 | Belgium | Fire, heat, and hot substances                  | 0 (0 to 0) | 0 (0 to 0)  | -12.3% (-17.7% to -7.4%)  |
| 35 | Belgium | Foreign body in eyes                            | 0 (0 to 0) | 0 (0 to 0)  | 0% (0% to 0%)             |
| 36 | Belgium | Foreign body in other body part                 | 0 (0 to 0) | 0 (0 to 0)  | 7.5% (3% to 12.7%)        |
| 37 | Belgium | Motor vehicle road injuries                     | 1 (0 to 1) | 0 (0 to 1)  | -50.7% (-57.7% to -43.6%) |
| 38 | Belgium | Motorcyclist road injuries                      | 0 (0 to 0) | 0 (0 to 0)  | -5.7% (-22.2% to 14%)     |
| 39 | Belgium | Non-venomous animal contact                     | 0 (0 to 0) | 0 (0 to 0)  | -7.6% (-11.3% to -3.4%)   |
| 40 | Belgium | Other exposure to mechanical forces             | 1 (0 to 1) | 1 (0 to 1)  | -5.4% (-11.6% to -0.1%)   |
| 41 | Belgium | Other road injuries                             | 0 (0 to 0) | 0 (0 to 0)  | -9.3% (-23.2% to 7.2%)    |
| 42 | Belgium | Other transport injuries                        | 0 (0 to 0) | 0 (0 to 0)  | 10.3% (5.2% to 15.2%)     |
| 43 | Belgium | Other unintentional injuries                    | 0 (0 to 0) | 0 (0 to 0)  | -7.4% (-12% to -2.7%)     |
| 44 | Belgium | Pedestrian road injuries                        | 0 (0 to 0) | 0 (0 to 0)  | -63.5% (-70.3% to -55.8%) |
| 45 |         |                                                 |            |             |                           |
| 46 |         |                                                 |            |             |                           |



|    |         |                                                 |            |            |                           |
|----|---------|-------------------------------------------------|------------|------------|---------------------------|
| 1  |         |                                                 |            |            |                           |
| 2  | Belgium | Physical violence by firearm                    | 0 (0 to 0) | 0 (0 to 0) | 7.6% (-2.9% to 19.4%)     |
| 3  | Belgium | Physical violence by other means                | 0 (0 to 0) | 0 (0 to 0) | -13.4% (-19.9% to -7.5%)  |
| 4  | Belgium | Physical violence by sharp object               | 0 (0 to 0) | 0 (0 to 0) | -20.4% (-28.6% to -12.3%) |
| 5  | Belgium | Poisoning by carbon monoxide                    | 0 (0 to 0) | 0 (0 to 0) | -24.6% (-32.9% to -16%)   |
| 6  | Belgium | Poisoning by other means                        | 0 (0 to 0) | 0 (0 to 0) | -29.2% (-35.5% to -22.6%) |
| 7  | Belgium | Pulmonary aspiration and foreign body in airway | 0 (0 to 0) | 0 (0 to 0) | -10.9% (-20.6% to 0.2%)   |
| 8  | Belgium | Self-harm by firearm                            | 0 (0 to 0) | 0 (0 to 0) | -28% (-40.5% to -15.3%)   |
| 9  | Belgium | Self-harm by other specified means              | 0 (0 to 1) | 0 (0 to 1) | -8.2% (-13% to -3.4%)     |
| 10 | Belgium | Unintentional firearm injuries                  | 0 (0 to 0) | 0 (0 to 0) | -1.1% (-9.5% to 7.4%)     |
| 11 | Belgium | Venomous animal contact                         | 0 (0 to 0) | 0 (0 to 0) | -8% (-13.6% to -1.1%)     |
| 12 | Belize  | Adverse effects of medical treatment            | 0 (0 to 0) | 0 (0 to 0) | 0% (0% to 0%)             |
| 13 | Belize  | Conflict and terrorism                          | 2 (0 to 5) | 0 (0 to 0) | NA                        |
| 14 | Belize  | Cyclist road injuries                           | 0 (0 to 1) | 0 (0 to 1) | -22% (-31.6% to -11.2%)   |
| 15 | Belize  | Drowning                                        | 0 (0 to 0) | 0 (0 to 0) | 26.2% (15.9% to 38.8%)    |
| 16 | Belize  | Environmental heat and cold exposure            | 0 (0 to 0) | 0 (0 to 0) | 5.2% (1.5% to 9.6%)       |
| 17 | Belize  | Executions and police conflict                  | 0 (0 to 0) | 0 (0 to 0) | NA                        |
| 18 | Belize  | Exposure to forces of nature                    | 0 (0 to 0) | 0 (0 to 0) | NA                        |
| 19 | Belize  | Falls                                           | 1 (1 to 1) | 1 (1 to 2) | 55.7% (49.9% to 61.7%)    |
| 20 | Belize  | Fire, heat, and hot substances                  | 0 (0 to 0) | 0 (0 to 0) | 3.1% (-4.2% to 11.9%)     |
| 21 | Belize  | Foreign body in eyes                            | 0 (0 to 0) | 0 (0 to 0) | 0% (0% to 0%)             |
| 22 | Belize  | Foreign body in other body part                 | 0 (0 to 0) | 0 (0 to 0) | -2.4% (-6.3% to 1.6%)     |
| 23 | Belize  | Motor vehicle road injuries                     | 1 (0 to 1) | 1 (0 to 1) | -7.1% (-16.9% to 3.8%)    |
| 24 | Belize  | Motorcyclist road injuries                      | 0 (0 to 0) | 0 (0 to 1) | 54.2% (30.8% to 82.1%)    |
| 25 | Belize  | Non-venomous animal contact                     | 0 (0 to 0) | 0 (0 to 0) | 25.4% (14.2% to 37.9%)    |
| 26 | Belize  | Other exposure to mechanical forces             | 0 (0 to 1) | 0 (0 to 1) | 31.6% (20.1% to 42.7%)    |
| 27 | Belize  | Other road injuries                             | 0 (0 to 0) | 0 (0 to 0) | 2% (-9.2% to 14.2%)       |
| 28 | Belize  | Other transport injuries                        | 0 (0 to 0) | 0 (0 to 0) | 27.2% (19.1% to 36.1%)    |
| 29 | Belize  | Other unintentional injuries                    | 0 (0 to 0) | 0 (0 to 0) | 3.8% (-1.4% to 8.9%)      |
| 30 | Belize  | Pedestrian road injuries                        | 0 (0 to 0) | 0 (0 to 0) | -13.6% (-23.2% to -2.5%)  |
| 31 | Belize  | Physical violence by firearm                    | 0 (0 to 0) | 0 (0 to 0) | 283.5% (215.8% to 390.7%) |
| 32 | Belize  | Physical violence by other means                | 0 (0 to 0) | 0 (0 to 0) | 58% (37.7% to 78.8%)      |
| 33 | Belize  | Physical violence by sharp object               | 0 (0 to 0) | 0 (0 to 0) | 68.8% (42.5% to 96%)      |
| 34 | Belize  | Poisoning by carbon monoxide                    | 0 (0 to 0) | 0 (0 to 0) | 18.2% (-1.2% to 37.8%)    |
| 35 | Belize  | Poisoning by other means                        | 0 (0 to 0) | 0 (0 to 0) | -28.2% (-39.5% to -15.7%) |
| 36 | Belize  | Pulmonary aspiration and foreign body in airway | 0 (0 to 0) | 0 (0 to 0) | -23.9% (-31.2% to -15.4%) |
| 37 | Belize  | Self-harm by firearm                            | 0 (0 to 0) | 0 (0 to 0) | 28.9% (15.3% to 46.9%)    |
| 38 | Belize  | Self-harm by other specified means              | 0 (0 to 0) | 0 (0 to 0) | 4.5% (-5% to 13.2%)       |
| 39 | Belize  | Unintentional firearm injuries                  | 0 (0 to 1) | 0 (0 to 1) | 17% (4.6% to 27.2%)       |
| 40 | Belize  | Venomous animal contact                         | 0 (0 to 0) | 0 (0 to 0) | 40.6% (26.6% to 58.6%)    |
| 41 | Benin   | Adverse effects of medical treatment            | 0 (0 to 0) | 0 (0 to 0) | 0% (0% to 0%)             |
| 42 | Benin   | Conflict and terrorism                          | 0 (0 to 0) | 0 (0 to 0) | NA                        |
| 43 | Benin   | Cyclist road injuries                           | 1 (1 to 3) | 1 (1 to 3) | 0.9% (-8% to 9.2%)        |
| 44 | Benin   | Drowning                                        | 0 (0 to 0) | 0 (0 to 0) | -13.1% (-20% to -6%)      |
| 45 |         |                                                 |            |            |                           |
| 46 |         |                                                 |            |            |                           |

|    |         |                                                 |            |            |                           |
|----|---------|-------------------------------------------------|------------|------------|---------------------------|
| 1  |         |                                                 |            |            |                           |
| 2  | Benin   | Environmental heat and cold exposure            | 0 (0 to 0) | 0 (0 to 0) | 2.6% (-2% to 8.1%)        |
| 3  | Benin   | Executions and police conflict                  | 0 (0 to 0) | 0 (0 to 0) | NA                        |
| 4  | Benin   | Exposure to forces of nature                    | 0 (0 to 0) | 0 (0 to 0) | NA                        |
| 5  | Benin   | Falls                                           | 3 (2 to 4) | 3 (2 to 4) | 14.7% (10.8% to 19.3%)    |
| 6  | Benin   | Fire, heat, and hot substances                  | 0 (0 to 0) | 0 (0 to 0) | -5.9% (-10.9% to -0.6%)   |
| 7  | Benin   | Foreign body in eyes                            | 0 (0 to 0) | 0 (0 to 0) | 0% (0% to 0%)             |
| 8  | Benin   | Foreign body in other body part                 | 1 (0 to 1) | 1 (0 to 1) | 0.3% (-3.1% to 3.4%)      |
| 9  | Benin   | Motor vehicle road injuries                     | 1 (1 to 3) | 2 (1 to 3) | 25% (15.6% to 36.8%)      |
| 10 | Benin   | Motorcyclist road injuries                      | 1 (1 to 3) | 1 (0 to 2) | -23.7% (-30.2% to -16.8%) |
| 11 | Benin   | Non-venomous animal contact                     | 0 (0 to 0) | 0 (0 to 0) | -2.2% (-6.5% to 2.3%)     |
| 12 | Benin   | Other exposure to mechanical forces             | 0 (0 to 0) | 0 (0 to 0) | -10% (-14.6% to -5.5%)    |
| 13 | Benin   | Other road injuries                             | 0 (0 to 0) | 0 (0 to 0) | 9.1% (-1.9% to 21.3%)     |
| 14 | Benin   | Other transport injuries                        | 0 (0 to 1) | 0 (0 to 1) | -11.7% (-15.7% to -7.7%)  |
| 15 | Benin   | Other unintentional injuries                    | 0 (0 to 1) | 0 (0 to 0) | -12.5% (-16.9% to -7.8%)  |
| 16 | Benin   | Pedestrian road injuries                        | 1 (1 to 3) | 2 (1 to 3) | 19.4% (11.2% to 28.7%)    |
| 17 | Benin   | Physical violence by firearm                    | 0 (0 to 0) | 0 (0 to 0) | 37.4% (24.1% to 55.3%)    |
| 18 | Benin   | Physical violence by other means                | 0 (0 to 0) | 0 (0 to 0) | 17.3% (10.7% to 24.6%)    |
| 19 | Benin   | Physical violence by sharp object               | 0 (0 to 0) | 0 (0 to 0) | 17.9% (9.8% to 26.5%)     |
| 20 | Benin   | Poisoning by carbon monoxide                    | 0 (0 to 0) | 0 (0 to 0) | 14.1% (2.6% to 27.3%)     |
| 21 | Benin   | Poisoning by other means                        | 0 (0 to 0) | 0 (0 to 0) | -17.9% (-23.9% to -11.6%) |
| 22 | Benin   | Pulmonary aspiration and foreign body in airway | 0 (0 to 0) | 0 (0 to 0) | -8.6% (-16.7% to 0.4%)    |
| 23 | Benin   | Self-harm by firearm                            | 0 (0 to 0) | 0 (0 to 0) | 19.5% (7.3% to 34.8%)     |
| 24 | Benin   | Self-harm by other specified means              | 0 (0 to 0) | 0 (0 to 0) | 12.6% (7.6% to 17.9%)     |
| 25 | Benin   | Unintentional firearm injuries                  | 0 (0 to 0) | 0 (0 to 0) | -14.3% (-21.5% to -7.3%)  |
| 26 | Bermuda | Venomous animal contact                         | 0 (0 to 0) | 0 (0 to 0) | -1.8% (-7.9% to 5.3%)     |
| 27 | Bermuda | Adverse effects of medical treatment            | 0 (0 to 0) | 0 (0 to 0) | 0% (0% to 0%)             |
| 28 | Bermuda | Conflict and terrorism                          | 0 (0 to 0) | 0 (0 to 0) | NA                        |
| 29 | Bermuda | Cyclist road injuries                           | 1 (0 to 2) | 1 (0 to 1) | -22% (-30.2% to -12.1%)   |
| 30 | Bermuda | Drowning                                        | 0 (0 to 0) | 0 (0 to 0) | 67% (51.6% to 83.7%)      |
| 31 | Bermuda | Environmental heat and cold exposure            | 0 (0 to 0) | 0 (0 to 0) | 2.5% (-1.4% to 7.1%)      |
| 32 | Bermuda | Executions and police conflict                  | 0 (0 to 0) | 0 (0 to 0) | NA                        |
| 33 | Bermuda | Exposure to forces of nature                    | 0 (0 to 0) | 0 (0 to 0) | NA                        |
| 34 | Bermuda | Falls                                           | 4 (3 to 5) | 6 (4 to 8) | 49.6% (43.6% to 55.1%)    |
| 35 | Bermuda | Fire, heat, and hot substances                  | 0 (0 to 0) | 0 (0 to 1) | 21.4% (16.1% to 27.6%)    |
| 36 | Bermuda | Foreign body in eyes                            | 0 (0 to 0) | 0 (0 to 0) | 0% (0% to 0%)             |
| 37 | Bermuda | Foreign body in other body part                 | 0 (0 to 0) | 0 (0 to 0) | 6.7% (0.7% to 11.5%)      |
| 38 | Bermuda | Motor vehicle road injuries                     | 1 (0 to 1) | 0 (0 to 1) | -24.4% (-33.8% to -14.1%) |
| 39 | Bermuda | Motorcyclist road injuries                      | 2 (1 to 4) | 2 (1 to 3) | -31.2% (-38.9% to -23%)   |
| 40 | Bermuda | Non-venomous animal contact                     | 0 (0 to 0) | 0 (0 to 0) | -2.4% (-6.4% to 2.2%)     |
| 41 | Bermuda | Other exposure to mechanical forces             | 0 (0 to 1) | 1 (0 to 1) | 19.2% (11.9% to 26%)      |
| 42 | Bermuda | Other road injuries                             | 0 (0 to 0) | 0 (0 to 0) | -18.9% (-27.4% to -8.7%)  |
| 43 | Bermuda | Other transport injuries                        | 0 (0 to 0) | 0 (0 to 0) | 9.7% (5.1% to 15.3%)      |
| 44 | Bermuda | Other unintentional injuries                    | 0 (0 to 1) | 1 (0 to 1) | 11.8% (5.5% to 17.6%)     |
| 45 |         |                                                 |            |            |                           |
| 46 |         |                                                 |            |            |                           |

|    |                                  |                                                 |            |            |                           |
|----|----------------------------------|-------------------------------------------------|------------|------------|---------------------------|
| 1  |                                  |                                                 |            |            |                           |
| 2  | Bermuda                          | Pedestrian road injuries                        | 1 (0 to 1) | 0 (0 to 1) | -16.2% (-25% to -6%)      |
| 3  | Bermuda                          | Physical violence by firearm                    | 0 (0 to 0) | 0 (0 to 0) | 79.9% (59.9% to 107.6%)   |
| 4  | Bermuda                          | Physical violence by other means                | 0 (0 to 0) | 0 (0 to 0) | -4.1% (-13.1% to 4%)      |
| 5  | Bermuda                          | Physical violence by sharp object               | 0 (0 to 0) | 0 (0 to 0) | -7.6% (-18.7% to 2.3%)    |
| 6  | Bermuda                          | Poisoning by carbon monoxide                    | 0 (0 to 0) | 0 (0 to 0) | 2.3% (-10.8% to 15.9%)    |
| 7  | Bermuda                          | Poisoning by other means                        | 0 (0 to 0) | 0 (0 to 0) | -19.1% (-30.2% to -7.7%)  |
| 8  | Bermuda                          | Pulmonary aspiration and foreign body in airway | 0 (0 to 0) | 0 (0 to 0) | -1.7% (-11.1% to 7.5%)    |
| 9  | Bermuda                          | Self-harm by firearm                            | 0 (0 to 0) | 0 (0 to 0) | 5.7% (-4.6% to 20.6%)     |
| 10 | Bermuda                          | Self-harm by other specified means              | 0 (0 to 0) | 0 (0 to 0) | -15.1% (-23.7% to -6.8%)  |
| 11 | Bermuda                          | Unintentional firearm injuries                  | 0 (0 to 0) | 0 (0 to 0) | 34.6% (24.8% to 47%)      |
| 12 | Bermuda                          | Venomous animal contact                         | 0 (0 to 0) | 0 (0 to 0) | -2.6% (-7.7% to 2.8%)     |
| 13 | Bhutan                           | Adverse effects of medical treatment            | 0 (0 to 0) | 0 (0 to 0) | 0% (0% to 0%)             |
| 14 | Bhutan                           | Conflict and terrorism                          | 0 (0 to 0) | 0 (0 to 0) | NA                        |
| 15 | Bhutan                           | Cyclist road injuries                           | 1 (0 to 1) | 1 (1 to 2) | 31.4% (21% to 42.9%)      |
| 16 | Bhutan                           | Drowning                                        | 0 (0 to 0) | 0 (0 to 0) | 24.8% (8.6% to 38.5%)     |
| 17 | Bhutan                           | Environmental heat and cold exposure            | 0 (0 to 0) | 0 (0 to 0) | 6.5% (2.3% to 11%)        |
| 18 | Bhutan                           | Executions and police conflict                  | 0 (0 to 0) | 0 (0 to 0) | NA                        |
| 19 | Bhutan                           | Exposure to forces of nature                    | 0 (0 to 0) | 0 (0 to 0) | NA                        |
| 20 | Bhutan                           | Falls                                           | 1 (1 to 2) | 3 (2 to 4) | 101.1% (90.9% to 112.6%)  |
| 21 | Bhutan                           | Fire, heat, and hot substances                  | 0 (0 to 0) | 0 (0 to 0) | -9.2% (-15.3% to -2.3%)   |
| 22 | Bhutan                           | Foreign body in eyes                            | 0 (0 to 0) | 0 (0 to 0) | 0% (0% to 0%)             |
| 23 | Bhutan                           | Foreign body in other body part                 | 0 (0 to 0) | 0 (0 to 0) | 0.9% (-3.9% to 4.7%)      |
| 24 | Bhutan                           | Motor vehicle road injuries                     | 1 (0 to 1) | 1 (0 to 2) | 16.2% (6.6% to 26.4%)     |
| 25 | Bhutan                           | Motorcyclist road injuries                      | 0 (0 to 1) | 0 (0 to 1) | -4.3% (-13.8% to 4.9%)    |
| 26 | Bhutan                           | Non-venomous animal contact                     | 0 (0 to 1) | 0 (0 to 0) | -20.8% (-25.7% to -15.4%) |
| 27 | Bhutan                           | Other exposure to mechanical forces             | 0 (0 to 1) | 0 (0 to 1) | -8.3% (-14.8% to -1.3%)   |
| 28 | Bhutan                           | Other road injuries                             | 0 (0 to 0) | 0 (0 to 0) | 36.8% (25.4% to 49.7%)    |
| 29 | Bhutan                           | Other transport injuries                        | 0 (0 to 0) | 0 (0 to 0) | -4.8% (-10.9% to 1.8%)    |
| 30 | Bhutan                           | Other unintentional injuries                    | 0 (0 to 0) | 0 (0 to 0) | 2.7% (-1.3% to 6.8%)      |
| 31 | Bhutan                           | Pedestrian road injuries                        | 1 (0 to 1) | 0 (0 to 1) | -17.6% (-24.5% to -10%)   |
| 32 | Bhutan                           | Physical violence by firearm                    | 0 (0 to 0) | 0 (0 to 0) | 60.3% (35.8% to 87.7%)    |
| 33 | Bhutan                           | Physical violence by other means                | 0 (0 to 1) | 0 (0 to 1) | 1.1% (-5% to 7.2%)        |
| 34 | Bhutan                           | Physical violence by sharp object               | 0 (0 to 0) | 0 (0 to 0) | -13.3% (-21.7% to -5.7%)  |
| 35 | Bhutan                           | Poisoning by carbon monoxide                    | 0 (0 to 0) | 0 (0 to 0) | 46.3% (28.8% to 66.6%)    |
| 36 | Bhutan                           | Poisoning by other means                        | 0 (0 to 0) | 0 (0 to 0) | 0.3% (-8.5% to 9.5%)      |
| 37 | Bhutan                           | Pulmonary aspiration and foreign body in airway | 0 (0 to 0) | 0 (0 to 0) | -26.9% (-33.5% to -20.1%) |
| 38 | Bhutan                           | Self-harm by firearm                            | 0 (0 to 0) | 0 (0 to 0) | 17.3% (3.7% to 37.8%)     |
| 39 | Bhutan                           | Self-harm by other specified means              | 0 (0 to 0) | 0 (0 to 0) | -4.2% (-10.9% to 2.6%)    |
| 40 | Bhutan                           | Unintentional firearm injuries                  | 0 (0 to 0) | 0 (0 to 0) | -36.7% (-44.2% to -30.2%) |
| 41 | Bhutan                           | Venomous animal contact                         | 0 (0 to 0) | 0 (0 to 0) | -5.6% (-13.7% to 3.7%)    |
| 42 | Bolivia (Plurinational State of) | Adverse effects of medical treatment            | 0 (0 to 0) | 0 (0 to 0) | 0% (0% to 0%)             |
| 43 | Bolivia (Plurinational State of) | Conflict and terrorism                          | 0 (0 to 0) | 0 (0 to 0) | NA                        |
| 44 | Bolivia (Plurinational State of) | Cyclist road injuries                           | 0 (0 to 0) | 0 (0 to 0) | -11.5% (-19.7% to -3.2%)  |
| 45 |                                  |                                                 |            |            |                           |
| 46 |                                  |                                                 |            |            |                           |

|    |                                  |                                                 |             |            |                           |
|----|----------------------------------|-------------------------------------------------|-------------|------------|---------------------------|
| 1  |                                  |                                                 |             |            |                           |
| 2  | Bolivia (Plurinational State of) | Drowning                                        | 0 (0 to 0)  | 0 (0 to 0) | -15.8% (-24.7% to -5.8%)  |
| 3  | Bolivia (Plurinational State of) | Environmental heat and cold exposure            | 0 (0 to 0)  | 0 (0 to 0) | -0.5% (-4.4% to 3.9%)     |
| 4  | Bolivia (Plurinational State of) | Executions and police conflict                  | 0 (0 to 0)  | 0 (0 to 0) | NA                        |
| 5  | Bolivia (Plurinational State of) | Exposure to forces of nature                    | 0 (0 to 0)  | 0 (0 to 0) | NA                        |
| 6  | Bolivia (Plurinational State of) | Falls                                           | 1 (1 to 2)  | 2 (1 to 2) | 33.9% (28.4% to 39.5%)    |
| 7  | Bolivia (Plurinational State of) | Fire, heat, and hot substances                  | 0 (0 to 0)  | 0 (0 to 0) | -21% (-27.6% to -14.6%)   |
| 8  | Bolivia (Plurinational State of) | Foreign body in eyes                            | 0 (0 to 0)  | 0 (0 to 0) | 0% (0% to 0%)             |
| 9  | Bolivia (Plurinational State of) | Foreign body in other body part                 | 0 (0 to 0)  | 0 (0 to 0) | -9.8% (-15.6% to -4.5%)   |
| 10 | Bolivia (Plurinational State of) | Motor vehicle road injuries                     | 0 (0 to 1)  | 0 (0 to 1) | -12.2% (-18.9% to -4.6%)  |
| 11 | Bolivia (Plurinational State of) | Motorcyclist road injuries                      | 0 (0 to 0)  | 0 (0 to 0) | -7.7% (-16.8% to 3%)      |
| 12 | Bolivia (Plurinational State of) | Non-venomous animal contact                     | 0 (0 to 0)  | 0 (0 to 0) | -5.2% (-9.6% to -0.6%)    |
| 13 | Bolivia (Plurinational State of) | Other exposure to mechanical forces             | 0 (0 to 1)  | 0 (0 to 1) | 8.4% (-0.7% to 19.8%)     |
| 14 | Bolivia (Plurinational State of) | Other road injuries                             | 0 (0 to 0)  | 0 (0 to 0) | -8.9% (-17.9% to 1%)      |
| 15 | Bolivia (Plurinational State of) | Other transport injuries                        | 0 (0 to 0)  | 0 (0 to 0) | -1.1% (-5.4% to 3.5%)     |
| 16 | Bolivia (Plurinational State of) | Other unintentional injuries                    | 0 (0 to 0)  | 0 (0 to 0) | -32.2% (-36.1% to -28.3%) |
| 17 | Bolivia (Plurinational State of) | Pedestrian road injuries                        | 0 (0 to 0)  | 0 (0 to 0) | -38.8% (-44.6% to -32.3%) |
| 18 | Bolivia (Plurinational State of) | Physical violence by firearm                    | 0 (0 to 0)  | 0 (0 to 0) | 48.4% (30% to 74.6%)      |
| 19 | Bolivia (Plurinational State of) | Physical violence by other means                | 0 (0 to 0)  | 0 (0 to 0) | -9.6% (-18.1% to -2%)     |
| 20 | Bolivia (Plurinational State of) | Physical violence by sharp object               | 0 (0 to 0)  | 0 (0 to 0) | -10.6% (-18.9% to -2.1%)  |
| 21 | Bolivia (Plurinational State of) | Poisoning by carbon monoxide                    | 0 (0 to 0)  | 0 (0 to 0) | 49.6% (28.3% to 73.2%)    |
| 22 | Bolivia (Plurinational State of) | Poisoning by other means                        | 0 (0 to 0)  | 0 (0 to 0) | -17.9% (-25.6% to -9.9%)  |
| 23 | Bolivia (Plurinational State of) | Pulmonary aspiration and foreign body in airway | 0 (0 to 0)  | 0 (0 to 0) | -53.1% (-60.1% to -46.1%) |
| 24 | Bolivia (Plurinational State of) | Self-harm by firearm                            | 0 (0 to 0)  | 0 (0 to 0) | 25% (10.4% to 40.3%)      |
| 25 | Bolivia (Plurinational State of) | Self-harm by other specified means              | 0 (0 to 0)  | 0 (0 to 0) | 7.3% (-0.6% to 15.5%)     |
| 26 | Bolivia (Plurinational State of) | Unintentional firearm injuries                  | 0 (0 to 0)  | 0 (0 to 0) | -23.8% (-32.9% to -16.5%) |
| 27 | Bolivia (Plurinational State of) | Venomous animal contact                         | 0 (0 to 0)  | 0 (0 to 0) | -8% (-12.4% to -3.2%)     |
| 28 | Bosnia and Herzegovina           | Adverse effects of medical treatment            | 0 (0 to 0)  | 0 (0 to 0) | 0% (0% to 0%)             |
| 29 | Bosnia and Herzegovina           | Conflict and terrorism                          | 4 (1 to 14) | 0 (0 to 0) | NA                        |
| 30 | Bosnia and Herzegovina           | Cyclist road injuries                           | 1 (0 to 1)  | 1 (0 to 1) | -4.9% (-13% to 3.4%)      |
| 31 | Bosnia and Herzegovina           | Drowning                                        | 0 (0 to 0)  | 0 (0 to 0) | 116.7% (86.1% to 145.4%)  |
| 32 | Bosnia and Herzegovina           | Environmental heat and cold exposure            | 0 (0 to 0)  | 0 (0 to 0) | 4.7% (-1.1% to 11.3%)     |
| 33 | Bosnia and Herzegovina           | Executions and police conflict                  | 0 (0 to 0)  | 0 (0 to 0) | NA                        |
| 34 | Bosnia and Herzegovina           | Exposure to forces of nature                    | 0 (0 to 0)  | 0 (0 to 0) | NA                        |
| 35 | Bosnia and Herzegovina           | Falls                                           | 4 (3 to 6)  | 5 (4 to 7) | 25.4% (20.7% to 30.3%)    |
| 36 | Bosnia and Herzegovina           | Fire, heat, and hot substances                  | 0 (0 to 0)  | 0 (0 to 0) | -16.9% (-21.2% to -12.9%) |
| 37 | Bosnia and Herzegovina           | Foreign body in eyes                            | 0 (0 to 0)  | 0 (0 to 0) | 0% (0% to 0%)             |
| 38 | Bosnia and Herzegovina           | Foreign body in other body part                 | 0 (0 to 0)  | 0 (0 to 0) | -3.8% (-7.3% to 0.2%)     |
| 39 | Bosnia and Herzegovina           | Motor vehicle road injuries                     | 1 (1 to 2)  | 1 (1 to 2) | 17.8% (8.1% to 28%)       |
| 40 | Bosnia and Herzegovina           | Motorcyclist road injuries                      | 0 (0 to 0)  | 0 (0 to 0) | 6% (-7% to 20.8%)         |
| 41 | Bosnia and Herzegovina           | Non-venomous animal contact                     | 0 (0 to 0)  | 0 (0 to 0) | -30% (-33.1% to -25.9%)   |
| 42 | Bosnia and Herzegovina           | Other exposure to mechanical forces             | 2 (1 to 3)  | 2 (1 to 3) | -7.2% (-13.4% to -1%)     |
| 43 | Bosnia and Herzegovina           | Other road injuries                             | 0 (0 to 0)  | 0 (0 to 0) | -9.7% (-17.6% to -1%)     |
| 44 | Bosnia and Herzegovina           | Other transport injuries                        | 0 (0 to 0)  | 0 (0 to 0) | -7.8% (-12.3% to -3.7%)   |
| 45 |                                  |                                                 |             |            |                           |
| 46 |                                  |                                                 |             |            |                           |

|    |                        |                                                 |            |            |                           |
|----|------------------------|-------------------------------------------------|------------|------------|---------------------------|
| 1  |                        |                                                 |            |            |                           |
| 2  | Bosnia and Herzegovina | Other unintentional injuries                    | 0 (0 to 1) | 0 (0 to 0) | -10.7% (-15.5% to -6.5%)  |
| 3  | Bosnia and Herzegovina | Pedestrian road injuries                        | 0 (0 to 1) | 0 (0 to 1) | -7.1% (-14.3% to 0.7%)    |
| 4  | Bosnia and Herzegovina | Physical violence by firearm                    | 0 (0 to 0) | 0 (0 to 0) | 107.8% (85.2% to 136.6%)  |
| 5  | Bosnia and Herzegovina | Physical violence by other means                | 1 (0 to 1) | 0 (0 to 1) | -22.5% (-28.6% to -16.6%) |
| 6  | Bosnia and Herzegovina | Physical violence by sharp object               | 0 (0 to 0) | 0 (0 to 0) | -5.6% (-14.3% to 4.3%)    |
| 7  | Bosnia and Herzegovina | Poisoning by carbon monoxide                    | 0 (0 to 0) | 0 (0 to 0) | -4.7% (-22.2% to 14.8%)   |
| 8  | Bosnia and Herzegovina | Poisoning by other means                        | 0 (0 to 0) | 0 (0 to 0) | -43.2% (-53.6% to -31.1%) |
| 9  | Bosnia and Herzegovina | Pulmonary aspiration and foreign body in airway | 0 (0 to 0) | 0 (0 to 0) | -14.8% (-21.5% to -6.7%)  |
| 10 | Bosnia and Herzegovina | Self-harm by firearm                            | 0 (0 to 0) | 0 (0 to 0) | 44.9% (27.8% to 64.9%)    |
| 11 | Bosnia and Herzegovina | Self-harm by other specified means              | 0 (0 to 0) | 0 (0 to 0) | -2% (-7.8% to 3.1%)       |
| 12 | Bosnia and Herzegovina | Unintentional firearm injuries                  | 0 (0 to 0) | 0 (0 to 0) | -19.8% (-28.1% to -12.3%) |
| 13 | Bosnia and Herzegovina | Venomous animal contact                         | 0 (0 to 0) | 0 (0 to 0) | -31.3% (-35.6% to -26.7%) |
| 14 | Botswana               | Adverse effects of medical treatment            | 0 (0 to 0) | 0 (0 to 0) | 0% (0% to 0%)             |
| 15 | Botswana               | Conflict and terrorism                          | 0 (0 to 0) | 0 (0 to 0) | NA                        |
| 16 | Botswana               | Cyclist road injuries                           | 1 (0 to 1) | 1 (0 to 1) | 25.7% (16.9% to 34.9%)    |
| 17 | Botswana               | Drowning                                        | 0 (0 to 0) | 0 (0 to 0) | 17.5% (6.3% to 28.4%)     |
| 18 | Botswana               | Environmental heat and cold exposure            | 0 (0 to 0) | 0 (0 to 0) | -10.9% (-16.5% to -5.1%)  |
| 19 | Botswana               | Executions and police conflict                  | 0 (0 to 0) | 0 (0 to 0) | NA                        |
| 20 | Botswana               | Exposure to forces of nature                    | 0 (0 to 0) | 0 (0 to 0) | NA                        |
| 21 | Botswana               | Falls                                           | 3 (2 to 4) | 3 (2 to 5) | 17.5% (13.6% to 22.2%)    |
| 22 | Botswana               | Fire, heat, and hot substances                  | 0 (0 to 0) | 0 (0 to 0) | -3.9% (-9.3% to 2.1%)     |
| 23 | Botswana               | Foreign body in eyes                            | 0 (0 to 0) | 0 (0 to 0) | 0% (0% to 0%)             |
| 24 | Botswana               | Foreign body in other body part                 | 1 (1 to 1) | 1 (0 to 1) | -3.7% (-7.3% to 0.2%)     |
| 25 | Botswana               | Motor vehicle road injuries                     | 1 (0 to 2) | 1 (1 to 2) | 33.3% (23.4% to 44.4%)    |
| 26 | Botswana               | Motorcyclist road injuries                      | 0 (0 to 0) | 0 (0 to 0) | 1.5% (-9.4% to 11.9%)     |
| 27 | Botswana               | Non-venomous animal contact                     | 0 (0 to 1) | 0 (0 to 0) | -24.1% (-27.7% to -20.8%) |
| 28 | Botswana               | Other exposure to mechanical forces             | 0 (0 to 1) | 0 (0 to 0) | -15.5% (-20.3% to -10.7%) |
| 29 | Botswana               | Other road injuries                             | 0 (0 to 0) | 0 (0 to 0) | 30.5% (19.1% to 42.6%)    |
| 30 | Botswana               | Other transport injuries                        | 0 (0 to 1) | 0 (0 to 0) | -9% (-12.9% to -4.7%)     |
| 31 | Botswana               | Other unintentional injuries                    | 0 (0 to 0) | 0 (0 to 0) | -18.4% (-22.2% to -14%)   |
| 32 | Botswana               | Pedestrian road injuries                        | 1 (1 to 2) | 2 (1 to 3) | 12.9% (4.7% to 20.9%)     |
| 33 | Botswana               | Physical violence by firearm                    | 0 (0 to 0) | 0 (0 to 0) | 277.1% (214.3% to 364%)   |
| 34 | Botswana               | Physical violence by other means                | 0 (0 to 0) | 0 (0 to 1) | 156% (122.9% to 199.9%)   |
| 35 | Botswana               | Physical violence by sharp object               | 0 (0 to 0) | 0 (0 to 0) | 178.3% (138.9% to 223.3%) |
| 36 | Botswana               | Poisoning by carbon monoxide                    | 0 (0 to 0) | 0 (0 to 0) | 17.5% (3.4% to 33.8%)     |
| 37 | Botswana               | Poisoning by other means                        | 0 (0 to 0) | 0 (0 to 0) | -14.2% (-21.5% to -7.9%)  |
| 38 | Botswana               | Pulmonary aspiration and foreign body in airway | 0 (0 to 0) | 0 (0 to 0) | -15.2% (-21.5% to -8.3%)  |
| 39 | Botswana               | Self-harm by firearm                            | 0 (0 to 0) | 0 (0 to 0) | 31.3% (17.8% to 49.1%)    |
| 40 | Botswana               | Self-harm by other specified means              | 0 (0 to 0) | 0 (0 to 0) | 20.2% (14.1% to 25.9%)    |
| 41 | Botswana               | Unintentional firearm injuries                  | 0 (0 to 0) | 0 (0 to 0) | -17.5% (-26% to -9%)      |
| 42 | Botswana               | Venomous animal contact                         | 0 (0 to 0) | 0 (0 to 0) | -26.5% (-32.3% to -20.4%) |
| 43 | Brazil                 | Adverse effects of medical treatment            | 0 (0 to 0) | 0 (0 to 0) | 0% (0% to 0%)             |
| 44 | Brazil                 | Conflict and terrorism                          | 0 (0 to 0) | 0 (0 to 0) | NA                        |
| 45 |                        |                                                 |            |            |                           |
| 46 |                        |                                                 |            |            |                           |

|    |                   |                                                 |              |              |                           |
|----|-------------------|-------------------------------------------------|--------------|--------------|---------------------------|
| 1  |                   |                                                 |              |              |                           |
| 2  | Brazil            | Cyclist road injuries                           | 0 (0 to 1)   | 0 (0 to 0)   | -34.6% (-44.8% to -22.7%) |
| 3  | Brazil            | Drowning                                        | 0 (0 to 0)   | 0 (0 to 0)   | -39.9% (-43.8% to -35.5%) |
| 4  | Brazil            | Environmental heat and cold exposure            | 0 (0 to 1)   | 0 (0 to 1)   | -13.1% (-17.7% to -7.1%)  |
| 5  | Brazil            | Executions and police conflict                  | 0 (0 to 0)   | 0 (0 to 0)   | NA                        |
| 6  | Brazil            | Exposure to forces of nature                    | 0 (0 to 0)   | 0 (0 to 0)   | NA                        |
| 7  | Brazil            | Falls                                           | 10 (7 to 14) | 10 (7 to 14) | 0.8% (-1.7% to 3.4%)      |
| 8  | Brazil            | Fire, heat, and hot substances                  | 0 (0 to 0)   | 0 (0 to 0)   | -55.4% (-57.6% to -53%)   |
| 9  | Brazil            | Foreign body in eyes                            | 0 (0 to 0)   | 0 (0 to 0)   | 0% (0% to 0%)             |
| 10 | Brazil            | Foreign body in other body part                 | 0 (0 to 0)   | 0 (0 to 0)   | -60.6% (-64.6% to -53.7%) |
| 11 | Brazil            | Motor vehicle road injuries                     | 0 (0 to 1)   | 0 (0 to 0)   | -52.3% (-61% to -42.5%)   |
| 12 | Brazil            | Motorcyclist road injuries                      | 0 (0 to 1)   | 1 (1 to 2)   | 167.3% (121.7% to 234.5%) |
| 13 | Brazil            | Non-venomous animal contact                     | 0 (0 to 0)   | 0 (0 to 0)   | -54.8% (-57.6% to -51%)   |
| 14 | Brazil            | Other exposure to mechanical forces             | 0 (0 to 1)   | 0 (0 to 1)   | -24.2% (-28.1% to -17.6%) |
| 15 | Brazil            | Other road injuries                             | 0 (0 to 0)   | 0 (0 to 0)   | 38.7% (18.6% to 62.9%)    |
| 16 | Brazil            | Other transport injuries                        | 0 (0 to 0)   | 0 (0 to 0)   | -54.1% (-55.9% to -52.3%) |
| 17 | Brazil            | Other unintentional injuries                    | 1 (1 to 2)   | 1 (0 to 1)   | -29.5% (-32% to -26.7%)   |
| 18 | Brazil            | Pedestrian road injuries                        | 1 (1 to 3)   | 1 (0 to 1)   | -45% (-53.4% to -35.8%)   |
| 19 | Brazil            | Physical violence by firearm                    | 0 (0 to 0)   | 0 (0 to 0)   | 74.2% (42.9% to 124.6%)   |
| 20 | Brazil            | Physical violence by other means                | 0 (0 to 1)   | 0 (0 to 0)   | -38.4% (-46.7% to -30.4%) |
| 21 | Brazil            | Physical violence by sharp object               | 0 (0 to 0)   | 0 (0 to 0)   | -42.8% (-52.6% to -33.7%) |
| 22 | Brazil            | Poisoning by carbon monoxide                    | 0 (0 to 0)   | 0 (0 to 0)   | -25.7% (-38.9% to -3.2%)  |
| 23 | Brazil            | Poisoning by other means                        | 0 (0 to 0)   | 0 (0 to 0)   | -47.3% (-52.7% to -40.4%) |
| 24 | Brazil            | Pulmonary aspiration and foreign body in airway | 0 (0 to 0)   | 0 (0 to 0)   | -45.7% (-51% to -41.2%)   |
| 25 | Brazil            | Self-harm by firearm                            | 0 (0 to 0)   | 0 (0 to 0)   | 36.8% (13.3% to 73.4%)    |
| 26 | Brazil            | Self-harm by other specified means              | 0 (0 to 0)   | 0 (0 to 0)   | -39.1% (-51.4% to -28.9%) |
| 27 | Brazil            | Unintentional firearm injuries                  | 0 (0 to 0)   | 0 (0 to 0)   | -56.6% (-61.1% to -52.1%) |
| 28 | Brazil            | Venomous animal contact                         | 0 (0 to 0)   | 0 (0 to 0)   | -53.8% (-57% to -48.4%)   |
| 29 | Brunei Darussalam | Adverse effects of medical treatment            | 0 (0 to 0)   | 0 (0 to 0)   | 0% (0% to 0%)             |
| 30 | Brunei Darussalam | Conflict and terrorism                          | 0 (0 to 0)   | 0 (0 to 0)   | NA                        |
| 31 | Brunei Darussalam | Cyclist road injuries                           | 0 (0 to 1)   | 0 (0 to 0)   | -23.1% (-30.3% to -15.6%) |
| 32 | Brunei Darussalam | Drowning                                        | 0 (0 to 0)   | 0 (0 to 0)   | 35.2% (24.8% to 46.3%)    |
| 33 | Brunei Darussalam | Environmental heat and cold exposure            | 0 (0 to 0)   | 0 (0 to 0)   | 5.2% (1% to 9.3%)         |
| 34 | Brunei Darussalam | Executions and police conflict                  | 0 (0 to 0)   | 0 (0 to 0)   | NA                        |
| 35 | Brunei Darussalam | Exposure to forces of nature                    | 0 (0 to 0)   | 0 (0 to 0)   | NA                        |
| 36 | Brunei Darussalam | Falls                                           | 4 (3 to 5)   | 4 (3 to 5)   | 9.6% (5.6% to 13.7%)      |
| 37 | Brunei Darussalam | Fire, heat, and hot substances                  | 0 (0 to 0)   | 0 (0 to 0)   | -23.1% (-27.5% to -18.5%) |
| 38 | Brunei Darussalam | Foreign body in eyes                            | 0 (0 to 0)   | 0 (0 to 0)   | 0% (0% to 0%)             |
| 39 | Brunei Darussalam | Foreign body in other body part                 | 0 (0 to 1)   | 0 (0 to 1)   | 6% (2.1% to 10.5%)        |
| 40 | Brunei Darussalam | Motor vehicle road injuries                     | 1 (1 to 2)   | 1 (0 to 1)   | -46.5% (-50.9% to -42.5%) |
| 41 | Brunei Darussalam | Motorcyclist road injuries                      | 0 (0 to 0)   | 0 (0 to 0)   | -30.3% (-38.5% to -21.1%) |
| 42 | Brunei Darussalam | Non-venomous animal contact                     | 0 (0 to 0)   | 0 (0 to 0)   | -10.7% (-14.4% to -6.7%)  |
| 43 | Brunei Darussalam | Other exposure to mechanical forces             | 1 (0 to 2)   | 1 (0 to 1)   | -7.5% (-11.9% to -2.9%)   |
| 44 | Brunei Darussalam | Other road injuries                             | 0 (0 to 0)   | 0 (0 to 0)   | -32.4% (-39.4% to -25.4%) |
| 45 |                   |                                                 |              |              |                           |
| 46 |                   |                                                 |              |              |                           |

|    |                   |                                                 |            |            |                           |
|----|-------------------|-------------------------------------------------|------------|------------|---------------------------|
| 1  |                   |                                                 |            |            |                           |
| 2  | Brunei Darussalam | Other transport injuries                        | 0 (0 to 1) | 0 (0 to 0) | -51.5% (-56.6% to -44.9%) |
| 3  | Brunei Darussalam | Other unintentional injuries                    | 0 (0 to 1) | 0 (0 to 1) | -21.4% (-26.1% to -16.9%) |
| 4  | Brunei Darussalam | Pedestrian road injuries                        | 0 (0 to 0) | 0 (0 to 0) | -26.4% (-33.2% to -18.3%) |
| 5  | Brunei Darussalam | Physical violence by firearm                    | 0 (0 to 0) | 0 (0 to 0) | 60.3% (40.3% to 88.6%)    |
| 6  | Brunei Darussalam | Physical violence by other means                | 0 (0 to 0) | 0 (0 to 0) | -24.8% (-32% to -18%)     |
| 7  | Brunei Darussalam | Physical violence by sharp object               | 0 (0 to 0) | 0 (0 to 0) | -27.1% (-37.7% to -17.4%) |
| 8  | Brunei Darussalam | Poisoning by carbon monoxide                    | 0 (0 to 0) | 0 (0 to 0) | -3.8% (-12.9% to 7.4%)    |
| 9  | Brunei Darussalam | Poisoning by other means                        | 0 (0 to 0) | 0 (0 to 0) | -21.5% (-27.7% to -14.5%) |
| 10 | Brunei Darussalam | Pulmonary aspiration and foreign body in airway | 0 (0 to 0) | 0 (0 to 0) | 1.1% (-5.7% to 8%)        |
| 11 | Brunei Darussalam | Self-harm by firearm                            | 0 (0 to 0) | 0 (0 to 0) | 4.8% (-10.6% to 19.5%)    |
| 12 | Brunei Darussalam | Self-harm by other specified means              | 0 (0 to 0) | 0 (0 to 0) | 10.3% (3.3% to 17%)       |
| 13 | Brunei Darussalam | Unintentional firearm injuries                  | 0 (0 to 0) | 0 (0 to 0) | -6.7% (-13.9% to 1.1%)    |
| 14 | Brunei Darussalam | Venomous animal contact                         | 0 (0 to 0) | 0 (0 to 0) | -6.3% (-11.8% to -0.1%)   |
| 15 | Bulgaria          | Adverse effects of medical treatment            | 0 (0 to 0) | 0 (0 to 0) | 0% (0% to 0%)             |
| 16 | Bulgaria          | Conflict and terrorism                          | 0 (0 to 0) | 0 (0 to 0) | NA                        |
| 17 | Bulgaria          | Cyclist road injuries                           | 1 (0 to 1) | 1 (0 to 1) | -11.6% (-21.9% to -0.7%)  |
| 18 | Bulgaria          | Drowning                                        | 0 (0 to 0) | 0 (0 to 0) | 36.7% (19.2% to 52.7%)    |
| 19 | Bulgaria          | Environmental heat and cold exposure            | 0 (0 to 0) | 0 (0 to 0) | -10.9% (-16% to -6.2%)    |
| 20 | Bulgaria          | Executions and police conflict                  | 0 (0 to 0) | 0 (0 to 0) | NA                        |
| 21 | Bulgaria          | Exposure to forces of nature                    | 0 (0 to 0) | 0 (0 to 0) | NA                        |
| 22 | Bulgaria          | Falls                                           | 5 (4 to 7) | 5 (4 to 7) | 0.5% (-4.1% to 5%)        |
| 23 | Bulgaria          | Fire, heat, and hot substances                  | 0 (0 to 0) | 0 (0 to 0) | -7.9% (-13.5% to -2.2%)   |
| 24 | Bulgaria          | Foreign body in eyes                            | 0 (0 to 0) | 0 (0 to 0) | 0% (0% to 0%)             |
| 25 | Bulgaria          | Foreign body in other body part                 | 0 (0 to 0) | 0 (0 to 0) | -0.2% (-4.7% to 3.8%)     |
| 26 | Bulgaria          | Motor vehicle road injuries                     | 2 (1 to 3) | 2 (1 to 3) | -4.6% (-16.9% to 8.4%)    |
| 27 | Bulgaria          | Motorcyclist road injuries                      | 0 (0 to 1) | 0 (0 to 0) | -18.8% (-31.3% to -4.2%)  |
| 28 | Bulgaria          | Non-venomous animal contact                     | 0 (0 to 0) | 0 (0 to 0) | -10.3% (-13.7% to -6.6%)  |
| 29 | Bulgaria          | Other exposure to mechanical forces             | 2 (1 to 3) | 2 (1 to 3) | 9.9% (4.4% to 15.9%)      |
| 30 | Bulgaria          | Other road injuries                             | 0 (0 to 0) | 0 (0 to 0) | -13.6% (-24% to -2%)      |
| 31 | Bulgaria          | Other transport injuries                        | 0 (0 to 0) | 0 (0 to 0) | -22.6% (-27.8% to -17.4%) |
| 32 | Bulgaria          | Other unintentional injuries                    | 1 (0 to 1) | 0 (0 to 0) | -51.9% (-57.2% to -45.5%) |
| 33 | Bulgaria          | Pedestrian road injuries                        | 1 (0 to 1) | 0 (0 to 0) | -52.2% (-59.9% to -45.1%) |
| 34 | Bulgaria          | Physical violence by firearm                    | 0 (0 to 0) | 0 (0 to 0) | -14.2% (-30.3% to 2.9%)   |
| 35 | Bulgaria          | Physical violence by other means                | 1 (0 to 1) | 0 (0 to 1) | -34.6% (-43.3% to -25.3%) |
| 36 | Bulgaria          | Physical violence by sharp object               | 0 (0 to 0) | 0 (0 to 0) | -48.4% (-57.7% to -39%)   |
| 37 | Bulgaria          | Poisoning by carbon monoxide                    | 0 (0 to 0) | 0 (0 to 0) | 21.5% (4.6% to 38.2%)     |
| 38 | Bulgaria          | Poisoning by other means                        | 0 (0 to 0) | 0 (0 to 0) | -6.7% (-17.9% to 4.9%)    |
| 39 | Bulgaria          | Pulmonary aspiration and foreign body in airway | 0 (0 to 0) | 0 (0 to 0) | -24.5% (-32.7% to -16.8%) |
| 40 | Bulgaria          | Self-harm by firearm                            | 0 (0 to 0) | 0 (0 to 0) | -10.4% (-22.2% to 8.5%)   |
| 41 | Bulgaria          | Self-harm by other specified means              | 0 (0 to 1) | 0 (0 to 0) | -39.8% (-43.9% to -35.1%) |
| 42 | Bulgaria          | Unintentional firearm injuries                  | 0 (0 to 0) | 0 (0 to 0) | -5.1% (-13.9% to 3.6%)    |
| 43 | Bulgaria          | Venomous animal contact                         | 0 (0 to 0) | 0 (0 to 0) | -12.4% (-16.9% to -7.2%)  |
| 44 | Burkina Faso      | Adverse effects of medical treatment            | 0 (0 to 0) | 0 (0 to 0) | 0% (0% to 0%)             |
| 45 |                   |                                                 |            |            |                           |
| 46 |                   |                                                 |            |            |                           |

|    |              |                                                 |            |            |                           |
|----|--------------|-------------------------------------------------|------------|------------|---------------------------|
| 1  |              |                                                 |            |            |                           |
| 2  | Burkina Faso | Conflict and terrorism                          | 0 (0 to 0) | 1 (0 to 3) | NA                        |
| 3  | Burkina Faso | Cyclist road injuries                           | 1 (1 to 2) | 2 (1 to 3) | 29.5% (20.5% to 39.2%)    |
| 4  | Burkina Faso | Drowning                                        | 0 (0 to 0) | 0 (0 to 0) | -5.7% (-12% to 1.3%)      |
| 5  | Burkina Faso | Environmental heat and cold exposure            | 0 (0 to 0) | 0 (0 to 0) | -0.2% (-4.8% to 5.3%)     |
| 6  | Burkina Faso | Executions and police conflict                  | 0 (0 to 0) | 1 (0 to 1) | NA                        |
| 7  | Burkina Faso | Exposure to forces of nature                    | 0 (0 to 0) | 0 (0 to 0) | NA                        |
| 8  | Burkina Faso | Falls                                           | 3 (2 to 4) | 3 (2 to 5) | 18.7% (14.5% to 23.4%)    |
| 9  | Burkina Faso | Fire, heat, and hot substances                  | 0 (0 to 0) | 0 (0 to 0) | -2.7% (-8.2% to 2.5%)     |
| 10 | Burkina Faso | Foreign body in eyes                            | 0 (0 to 0) | 0 (0 to 0) | 0% (0% to 0%)             |
| 11 | Burkina Faso | Foreign body in other body part                 | 1 (0 to 1) | 1 (0 to 1) | -1.9% (-4.9% to 1.4%)     |
| 12 | Burkina Faso | Motor vehicle road injuries                     | 1 (1 to 3) | 2 (1 to 3) | 16.6% (7.8% to 26.8%)     |
| 13 | Burkina Faso | Motorcyclist road injuries                      | 1 (0 to 2) | 1 (1 to 2) | 38.4% (28.5% to 50%)      |
| 14 | Burkina Faso | Non-venomous animal contact                     | 0 (0 to 0) | 0 (0 to 0) | -13.7% (-17.4% to -9.5%)  |
| 15 | Burkina Faso | Other exposure to mechanical forces             | 0 (0 to 0) | 0 (0 to 0) | -2.1% (-6.8% to 3.2%)     |
| 16 | Burkina Faso | Other road injuries                             | 0 (0 to 0) | 0 (0 to 0) | 6.7% (-2% to 16.8%)       |
| 17 | Burkina Faso | Other transport injuries                        | 0 (0 to 1) | 0 (0 to 1) | -3.6% (-7.4% to 0.4%)     |
| 18 | Burkina Faso | Other unintentional injuries                    | 0 (0 to 0) | 0 (0 to 0) | -9.6% (-13.7% to -5%)     |
| 19 | Burkina Faso | Pedestrian road injuries                        | 2 (1 to 3) | 2 (1 to 4) | 5.7% (-1.2% to 12.8%)     |
| 20 | Burkina Faso | Physical violence by firearm                    | 0 (0 to 0) | 0 (0 to 0) | 25.3% (11.8% to 43.1%)    |
| 21 | Burkina Faso | Physical violence by other means                | 0 (0 to 0) | 0 (0 to 0) | 3.7% (-1.4% to 9.1%)      |
| 22 | Burkina Faso | Physical violence by sharp object               | 0 (0 to 0) | 0 (0 to 0) | 4.2% (-2.4% to 11.7%)     |
| 23 | Burkina Faso | Poisoning by carbon monoxide                    | 0 (0 to 0) | 0 (0 to 0) | 6.7% (-3.2% to 17.5%)     |
| 24 | Burkina Faso | Poisoning by other means                        | 0 (0 to 0) | 0 (0 to 0) | -14.2% (-19.9% to -8.1%)  |
| 25 | Burkina Faso | Pulmonary aspiration and foreign body in airway | 0 (0 to 0) | 0 (0 to 0) | -7.8% (-15.7% to 0%)      |
| 26 | Burkina Faso | Self-harm by firearm                            | 0 (0 to 0) | 0 (0 to 0) | 16% (3.4% to 31.6%)       |
| 27 | Burkina Faso | Self-harm by other specified means              | 0 (0 to 0) | 0 (0 to 0) | 12% (7.1% to 17%)         |
| 28 | Burkina Faso | Unintentional firearm injuries                  | 0 (0 to 0) | 0 (0 to 0) | -11.2% (-18.4% to -4.7%)  |
| 29 | Burkina Faso | Venomous animal contact                         | 0 (0 to 0) | 0 (0 to 0) | -14.2% (-20.2% to -7.7%)  |
| 30 | Burundi      | Adverse effects of medical treatment            | 0 (0 to 0) | 0 (0 to 0) | 0% (0% to 0%)             |
| 31 | Burundi      | Conflict and terrorism                          | 0 (0 to 0) | 0 (0 to 1) | NA                        |
| 32 | Burundi      | Cyclist road injuries                           | 1 (0 to 1) | 1 (0 to 1) | -19.8% (-26% to -14%)     |
| 33 | Burundi      | Drowning                                        | 0 (0 to 0) | 0 (0 to 0) | -21.9% (-27.5% to -16.2%) |
| 34 | Burundi      | Environmental heat and cold exposure            | 0 (0 to 0) | 0 (0 to 0) | -11% (-16% to -5.9%)      |
| 35 | Burundi      | Executions and police conflict                  | 0 (0 to 0) | 0 (0 to 0) | NA                        |
| 36 | Burundi      | Exposure to forces of nature                    | 0 (0 to 0) | 0 (0 to 0) | NA                        |
| 37 | Burundi      | Falls                                           | 1 (1 to 2) | 1 (1 to 2) | 5.4% (0.3% to 10.5%)      |
| 38 | Burundi      | Fire, heat, and hot substances                  | 0 (0 to 0) | 0 (0 to 0) | -17.4% (-22.1% to -12.5%) |
| 39 | Burundi      | Foreign body in eyes                            | 0 (0 to 0) | 0 (0 to 0) | 0% (0% to 0%)             |
| 40 | Burundi      | Foreign body in other body part                 | 0 (0 to 1) | 0 (0 to 1) | 1.8% (-2.5% to 6%)        |
| 41 | Burundi      | Motor vehicle road injuries                     | 1 (0 to 1) | 1 (0 to 1) | -5.5% (-12.4% to 2.2%)    |
| 42 | Burundi      | Motorcyclist road injuries                      | 0 (0 to 0) | 0 (0 to 0) | -7% (-14.4% to 0.9%)      |
| 43 | Burundi      | Non-venomous animal contact                     | 0 (0 to 1) | 0 (0 to 1) | -10.9% (-15.1% to -6.4%)  |
| 44 | Burundi      | Other exposure to mechanical forces             | 0 (0 to 0) | 0 (0 to 0) | -7.2% (-13.2% to -1%)     |
| 45 |              |                                                 |            |            |                           |
| 46 |              |                                                 |            |            |                           |



|    |            |                                                 |            |            |                           |
|----|------------|-------------------------------------------------|------------|------------|---------------------------|
| 1  |            |                                                 |            |            |                           |
| 2  | Burundi    | Other road injuries                             | 0 (0 to 0) | 0 (0 to 0) | 15.7% (6% to 26.2%)       |
| 3  | Burundi    | Other transport injuries                        | 0 (0 to 0) | 0 (0 to 0) | -9.2% (-14.1% to -4%)     |
| 4  | Burundi    | Other unintentional injuries                    | 0 (0 to 0) | 0 (0 to 0) | -23.4% (-27.5% to -19%)   |
| 5  | Burundi    | Pedestrian road injuries                        | 1 (0 to 1) | 1 (0 to 1) | -15.1% (-21.1% to -8.2%)  |
| 6  | Burundi    | Physical violence by firearm                    | 0 (0 to 0) | 0 (0 to 0) | 19.2% (8.9% to 32.9%)     |
| 7  | Burundi    | Physical violence by other means                | 0 (0 to 0) | 0 (0 to 0) | -0.4% (-6.4% to 6.4%)     |
| 8  | Burundi    | Physical violence by sharp object               | 0 (0 to 0) | 0 (0 to 0) | 0.7% (-5% to 7.3%)        |
| 9  | Burundi    | Poisoning by carbon monoxide                    | 0 (0 to 0) | 0 (0 to 0) | 9.8% (-0.3% to 21.9%)     |
| 10 | Burundi    | Poisoning by other means                        | 0 (0 to 0) | 0 (0 to 0) | -22.1% (-27.6% to -15.7%) |
| 11 | Burundi    | Pulmonary aspiration and foreign body in airway | 0 (0 to 0) | 0 (0 to 0) | -4.2% (-14.8% to 9.6%)    |
| 12 | Burundi    | Self-harm by firearm                            | 0 (0 to 0) | 0 (0 to 0) | -0.6% (-11.7% to 15%)     |
| 13 | Burundi    | Self-harm by other specified means              | 0 (0 to 0) | 0 (0 to 0) | -27.5% (-31.2% to -23.8%) |
| 14 | Burundi    | Unintentional firearm injuries                  | 0 (0 to 0) | 0 (0 to 0) | -13.6% (-20.3% to -7.8%)  |
| 15 | Burundi    | Venomous animal contact                         | 0 (0 to 0) | 0 (0 to 0) | -20.8% (-27.5% to -14.1%) |
| 16 | Cabo Verde | Adverse effects of medical treatment            | 0 (0 to 0) | 0 (0 to 0) | 0% (0% to 0%)             |
| 17 | Cabo Verde | Conflict and terrorism                          | 0 (0 to 0) | 0 (0 to 0) | NA                        |
| 18 | Cabo Verde | Cyclist road injuries                           | 1 (0 to 2) | 1 (1 to 2) | 14.3% (6% to 22.8%)       |
| 19 | Cabo Verde | Drowning                                        | 0 (0 to 0) | 0 (0 to 0) | 60.9% (46.2% to 74%)      |
| 20 | Cabo Verde | Environmental heat and cold exposure            | 0 (0 to 0) | 0 (0 to 0) | 8% (2.6% to 14.7%)        |
| 21 | Cabo Verde | Executions and police conflict                  | 0 (0 to 0) | 0 (0 to 0) | NA                        |
| 22 | Cabo Verde | Exposure to forces of nature                    | 0 (0 to 0) | 0 (0 to 0) | NA                        |
| 23 | Cabo Verde | Falls                                           | 3 (2 to 4) | 4 (3 to 5) | 46.8% (41.7% to 52.8%)    |
| 24 | Cabo Verde | Fire, heat, and hot substances                  | 0 (0 to 0) | 0 (0 to 0) | 6% (0.4% to 11.9%)        |
| 25 | Cabo Verde | Foreign body in eyes                            | 0 (0 to 0) | 0 (0 to 0) | 0% (0% to 0%)             |
| 26 | Cabo Verde | Foreign body in other body part                 | 1 (0 to 1) | 1 (0 to 1) | -2.8% (-6.1% to 0.8%)     |
| 27 | Cabo Verde | Motor vehicle road injuries                     | 1 (0 to 1) | 1 (1 to 2) | 43.2% (31.5% to 57.1%)    |
| 28 | Cabo Verde | Motorcyclist road injuries                      | 0 (0 to 1) | 1 (0 to 1) | 26.1% (16% to 36.8%)      |
| 29 | Cabo Verde | Non-venomous animal contact                     | 0 (0 to 0) | 0 (0 to 0) | -9.9% (-16.9% to -0.5%)   |
| 30 | Cabo Verde | Other exposure to mechanical forces             | 0 (0 to 0) | 0 (0 to 0) | -2.5% (-6.7% to 2.6%)     |
| 31 | Cabo Verde | Other road injuries                             | 0 (0 to 0) | 0 (0 to 0) | 2.1% (-7% to 11.9%)       |
| 32 | Cabo Verde | Other transport injuries                        | 0 (0 to 0) | 0 (0 to 1) | 8% (3.3% to 12.8%)        |
| 33 | Cabo Verde | Other unintentional injuries                    | 0 (0 to 1) | 0 (0 to 1) | -11% (-15.6% to -6.8%)    |
| 34 | Cabo Verde | Pedestrian road injuries                        | 1 (1 to 2) | 2 (1 to 3) | 27.9% (18.9% to 37.4%)    |
| 35 | Cabo Verde | Physical violence by firearm                    | 0 (0 to 0) | 0 (0 to 0) | 106.8% (86.5% to 137.2%)  |
| 36 | Cabo Verde | Physical violence by other means                | 0 (0 to 1) | 0 (0 to 1) | 11.7% (3.7% to 20.4%)     |
| 37 | Cabo Verde | Physical violence by sharp object               | 0 (0 to 0) | 0 (0 to 0) | 16.1% (6.9% to 26%)       |
| 38 | Cabo Verde | Poisoning by carbon monoxide                    | 0 (0 to 0) | 0 (0 to 0) | 28.9% (15.8% to 43.2%)    |
| 39 | Cabo Verde | Poisoning by other means                        | 0 (0 to 0) | 0 (0 to 0) | -8.8% (-14.4% to -3.2%)   |
| 40 | Cabo Verde | Pulmonary aspiration and foreign body in airway | 0 (0 to 0) | 0 (0 to 0) | -19.3% (-26.6% to -12.4%) |
| 41 | Cabo Verde | Self-harm by firearm                            | 0 (0 to 0) | 0 (0 to 0) | 31.8% (16.3% to 51.5%)    |
| 42 | Cabo Verde | Self-harm by other specified means              | 0 (0 to 0) | 0 (0 to 0) | 35.2% (26.6% to 45.7%)    |
| 43 | Cabo Verde | Unintentional firearm injuries                  | 0 (0 to 0) | 0 (0 to 0) | -10.3% (-17.4% to -3.1%)  |
| 44 | Cabo Verde | Venomous animal contact                         | 0 (0 to 0) | 0 (0 to 0) | -18.5% (-26% to -9%)      |
| 45 |            |                                                 |            |            |                           |
| 46 |            |                                                 |            |            |                           |

|    |          |                                                 |            |            |                           |
|----|----------|-------------------------------------------------|------------|------------|---------------------------|
| 1  |          |                                                 |            |            |                           |
| 2  | Cambodia | Adverse effects of medical treatment            | 0 (0 to 0) | 0 (0 to 0) | 0% (0% to 0%)             |
| 3  | Cambodia | Conflict and terrorism                          | 2 (0 to 5) | 0 (0 to 0) | NA                        |
| 4  | Cambodia | Cyclist road injuries                           | 0 (0 to 0) | 0 (0 to 0) | 12.4% (1.7% to 22.6%)     |
| 5  | Cambodia | Drowning                                        | 0 (0 to 0) | 0 (0 to 0) | -24.9% (-31.1% to -17.5%) |
| 6  | Cambodia | Environmental heat and cold exposure            | 0 (0 to 0) | 0 (0 to 0) | 5.5% (1.1% to 9.8%)       |
| 7  | Cambodia | Executions and police conflict                  | 0 (0 to 0) | 0 (0 to 0) | NA                        |
| 8  | Cambodia | Exposure to forces of nature                    | 0 (0 to 0) | 0 (0 to 0) | NA                        |
| 9  | Cambodia | Falls                                           | 2 (1 to 2) | 3 (2 to 4) | 76.5% (70.1% to 83.1%)    |
| 10 | Cambodia | Fire, heat, and hot substances                  | 0 (0 to 0) | 0 (0 to 0) | -24.5% (-30.2% to -18.5%) |
| 11 | Cambodia | Foreign body in eyes                            | 0 (0 to 0) | 0 (0 to 0) | 0% (0% to 0%)             |
| 12 | Cambodia | Foreign body in other body part                 | 0 (0 to 0) | 0 (0 to 0) | -2.5% (-6.2% to 1.6%)     |
| 13 | Cambodia | Motor vehicle road injuries                     | 0 (0 to 1) | 0 (0 to 1) | -3.8% (-11.7% to 4.9%)    |
| 14 | Cambodia | Motorcyclist road injuries                      | 1 (0 to 1) | 1 (0 to 1) | 2% (-7.2% to 12.1%)       |
| 15 | Cambodia | Non-venomous animal contact                     | 0 (0 to 0) | 0 (0 to 0) | -26.1% (-30% to -22.1%)   |
| 16 | Cambodia | Other exposure to mechanical forces             | 0 (0 to 0) | 0 (0 to 0) | -11.3% (-17.2% to -5.5%)  |
| 17 | Cambodia | Other road injuries                             | 0 (0 to 0) | 0 (0 to 0) | 6.7% (-4.3% to 18.4%)     |
| 18 | Cambodia | Other transport injuries                        | 0 (0 to 0) | 0 (0 to 0) | -18.1% (-23.3% to -12.3%) |
| 19 | Cambodia | Other unintentional injuries                    | 0 (0 to 0) | 0 (0 to 0) | 4% (-2.7% to 11.3%)       |
| 20 | Cambodia | Pedestrian road injuries                        | 0 (0 to 0) | 0 (0 to 0) | -11.1% (-19.1% to -3.4%)  |
| 21 | Cambodia | Physical violence by firearm                    | 0 (0 to 0) | 0 (0 to 0) | 21% (5.9% to 38.4%)       |
| 22 | Cambodia | Physical violence by other means                | 0 (0 to 0) | 0 (0 to 0) | -3.5% (-10.8% to 4.4%)    |
| 23 | Cambodia | Physical violence by sharp object               | 0 (0 to 0) | 0 (0 to 0) | -5.4% (-14.6% to 4.1%)    |
| 24 | Cambodia | Poisoning by carbon monoxide                    | 0 (0 to 0) | 0 (0 to 0) | 48.1% (32.2% to 65.7%)    |
| 25 | Cambodia | Poisoning by other means                        | 0 (0 to 0) | 0 (0 to 0) | -7.7% (-15.6% to -0.1%)   |
| 26 | Cambodia | Pulmonary aspiration and foreign body in airway | 0 (0 to 0) | 0 (0 to 0) | -24.9% (-31.6% to -17.2%) |
| 27 | Cambodia | Self-harm by firearm                            | 0 (0 to 0) | 0 (0 to 0) | 67.3% (43.6% to 101.6%)   |
| 28 | Cambodia | Self-harm by other specified means              | 0 (0 to 0) | 0 (0 to 0) | -15.3% (-20.3% to -9.3%)  |
| 29 | Cambodia | Unintentional firearm injuries                  | 0 (0 to 0) | 0 (0 to 0) | -13% (-20% to -6.5%)      |
| 30 | Cambodia | Venomous animal contact                         | 0 (0 to 0) | 0 (0 to 0) | -15.6% (-21.6% to -8.9%)  |
| 31 | Cameroon | Adverse effects of medical treatment            | 0 (0 to 0) | 0 (0 to 0) | 0% (0% to 0%)             |
| 32 | Cameroon | Conflict and terrorism                          | 0 (0 to 0) | 1 (0 to 2) | NA                        |
| 33 | Cameroon | Cyclist road injuries                           | 1 (1 to 3) | 2 (1 to 3) | 22% (13.7% to 31.5%)      |
| 34 | Cameroon | Drowning                                        | 0 (0 to 0) | 0 (0 to 0) | -1.4% (-8.7% to 6.1%)     |
| 35 | Cameroon | Environmental heat and cold exposure            | 0 (0 to 0) | 0 (0 to 0) | -1.6% (-6.1% to 3.7%)     |
| 36 | Cameroon | Executions and police conflict                  | 0 (0 to 0) | 0 (0 to 0) | NA                        |
| 37 | Cameroon | Exposure to forces of nature                    | 0 (0 to 0) | 0 (0 to 0) | NA                        |
| 38 | Cameroon | Falls                                           | 3 (2 to 4) | 3 (2 to 5) | 19.3% (15% to 23.6%)      |
| 39 | Cameroon | Fire, heat, and hot substances                  | 0 (0 to 0) | 0 (0 to 0) | -6.5% (-11.7% to -1.3%)   |
| 40 | Cameroon | Foreign body in eyes                            | 0 (0 to 0) | 0 (0 to 0) | 0% (0% to 0%)             |
| 41 | Cameroon | Foreign body in other body part                 | 1 (0 to 1) | 1 (0 to 1) | 4.2% (0.3% to 8.3%)       |
| 42 | Cameroon | Motor vehicle road injuries                     | 2 (1 to 4) | 2 (1 to 4) | 10.8% (2.1% to 20.4%)     |
| 43 | Cameroon | Motorcyclist road injuries                      | 2 (1 to 3) | 2 (1 to 3) | 0.8% (-6.1% to 8.4%)      |
| 44 | Cameroon | Non-venomous animal contact                     | 0 (0 to 0) | 0 (0 to 0) | -1.1% (-5.2% to 3.6%)     |
| 45 |          |                                                 |            |            |                           |
| 46 |          |                                                 |            |            |                           |

|    |          |                                                 |            |            |                           |
|----|----------|-------------------------------------------------|------------|------------|---------------------------|
| 1  |          |                                                 |            |            |                           |
| 2  | Cameroon | Other exposure to mechanical forces             | 0 (0 to 0) | 0 (0 to 0) | -13% (-18.1% to -7.7%)    |
| 3  | Cameroon | Other road injuries                             | 0 (0 to 0) | 0 (0 to 0) | 22.3% (11.7% to 33.3%)    |
| 4  | Cameroon | Other transport injuries                        | 0 (0 to 0) | 0 (0 to 0) | -5% (-9% to -0.6%)        |
| 5  | Cameroon | Other unintentional injuries                    | 0 (0 to 0) | 0 (0 to 0) | -12% (-16.6% to -6.8%)    |
| 6  | Cameroon | Pedestrian road injuries                        | 1 (1 to 3) | 1 (1 to 3) | 4% (-3.8% to 12.2%)       |
| 7  | Cameroon | Physical violence by firearm                    | 0 (0 to 0) | 0 (0 to 0) | 29.6% (13.2% to 47.8%)    |
| 8  | Cameroon | Physical violence by other means                | 0 (0 to 0) | 0 (0 to 0) | -4.1% (-9.3% to 1%)       |
| 9  | Cameroon | Physical violence by sharp object               | 0 (0 to 0) | 0 (0 to 0) | 0.9% (-6.5% to 8.8%)      |
| 10 | Cameroon | Poisoning by carbon monoxide                    | 0 (0 to 0) | 0 (0 to 0) | 14.5% (1.1% to 28.3%)     |
| 11 | Cameroon | Poisoning by other means                        | 0 (0 to 0) | 0 (0 to 0) | -15% (-22.1% to -7.4%)    |
| 12 | Cameroon | Pulmonary aspiration and foreign body in airway | 0 (0 to 0) | 0 (0 to 0) | 4.8% (-4.1% to 15%)       |
| 13 | Cameroon | Self-harm by firearm                            | 0 (0 to 0) | 0 (0 to 0) | 32.6% (19% to 48%)        |
| 14 | Cameroon | Self-harm by other specified means              | 0 (0 to 0) | 0 (0 to 0) | 26.1% (19.3% to 33.7%)    |
| 15 | Cameroon | Unintentional firearm injuries                  | 0 (0 to 0) | 0 (0 to 0) | -14.1% (-22.1% to -6.1%)  |
| 16 | Cameroon | Venomous animal contact                         | 0 (0 to 0) | 0 (0 to 0) | -2.3% (-8.9% to 5.1%)     |
| 17 | Canada   | Adverse effects of medical treatment            | 0 (0 to 0) | 0 (0 to 0) | 0% (0% to 0%)             |
| 18 | Canada   | Conflict and terrorism                          | 0 (0 to 0) | 0 (0 to 0) | NA                        |
| 19 | Canada   | Cyclist road injuries                           | 0 (0 to 0) | 0 (0 to 0) | -8.8% (-22.4% to 6.9%)    |
| 20 | Canada   | Drowning                                        | 0 (0 to 0) | 0 (0 to 0) | 38% (22.9% to 56.2%)      |
| 21 | Canada   | Environmental heat and cold exposure            | 0 (0 to 0) | 0 (0 to 0) | -9.4% (-14.6% to -4.7%)   |
| 22 | Canada   | Executions and police conflict                  | 0 (0 to 0) | 0 (0 to 0) | NA                        |
| 23 | Canada   | Exposure to forces of nature                    | 0 (0 to 0) | 0 (0 to 0) | NA                        |
| 24 | Canada   | Falls                                           | 4 (3 to 6) | 6 (4 to 8) | 27% (21.7% to 32.9%)      |
| 25 | Canada   | Fire, heat, and hot substances                  | 0 (0 to 0) | 0 (0 to 0) | -17.7% (-23.6% to -12.2%) |
| 26 | Canada   | Foreign body in eyes                            | 0 (0 to 0) | 0 (0 to 0) | 0% (0% to 0%)             |
| 27 | Canada   | Foreign body in other body part                 | 0 (0 to 0) | 0 (0 to 0) | 0.8% (-2.7% to 4.5%)      |
| 28 | Canada   | Motor vehicle road injuries                     | 1 (1 to 2) | 1 (0 to 1) | -38.9% (-46.6% to -29.6%) |
| 29 | Canada   | Motorcyclist road injuries                      | 0 (0 to 0) | 0 (0 to 0) | -17.2% (-33.9% to 3.4%)   |
| 30 | Canada   | Non-venomous animal contact                     | 0 (0 to 0) | 0 (0 to 0) | -4.8% (-8.5% to -0.6%)    |
| 31 | Canada   | Other exposure to mechanical forces             | 1 (0 to 1) | 0 (0 to 1) | -16.8% (-23.8% to -10.7%) |
| 32 | Canada   | Other road injuries                             | 0 (0 to 0) | 0 (0 to 0) | 24.3% (6.3% to 46.4%)     |
| 33 | Canada   | Other transport injuries                        | 1 (0 to 1) | 1 (0 to 1) | -0.9% (-4% to 2.5%)       |
| 34 | Canada   | Other unintentional injuries                    | 0 (0 to 1) | 0 (0 to 1) | -14.3% (-18.4% to -9.7%)  |
| 35 | Canada   | Pedestrian road injuries                        | 0 (0 to 0) | 0 (0 to 0) | -18.1% (-29.6% to -3.2%)  |
| 36 | Canada   | Physical violence by firearm                    | 0 (0 to 0) | 0 (0 to 0) | 36.2% (23.7% to 50.2%)    |
| 37 | Canada   | Physical violence by other means                | 0 (0 to 0) | 0 (0 to 0) | -0.6% (-9.1% to 7.2%)     |
| 38 | Canada   | Physical violence by sharp object               | 0 (0 to 0) | 0 (0 to 0) | -4% (-14.4% to 6.3%)      |
| 39 | Canada   | Poisoning by carbon monoxide                    | 0 (0 to 0) | 0 (0 to 0) | 10.2% (1.8% to 19.1%)     |
| 40 | Canada   | Poisoning by other means                        | 0 (0 to 0) | 0 (0 to 0) | -8.1% (-12.8% to -3.9%)   |
| 41 | Canada   | Pulmonary aspiration and foreign body in airway | 0 (0 to 0) | 0 (0 to 0) | -14% (-19.9% to -8.3%)    |
| 42 | Canada   | Self-harm by firearm                            | 0 (0 to 0) | 0 (0 to 0) | -37.2% (-50.9% to -24.9%) |
| 43 | Canada   | Self-harm by other specified means              | 1 (0 to 1) | 1 (0 to 1) | 5.2% (-1.5% to 11.5%)     |
| 44 | Canada   | Unintentional firearm injuries                  | 0 (0 to 0) | 0 (0 to 0) | -2.9% (-12.8% to 8.2%)    |
| 45 |          |                                                 |            |            |                           |
| 46 |          |                                                 |            |            |                           |

|    |                          |                                                 |             |             |                           |
|----|--------------------------|-------------------------------------------------|-------------|-------------|---------------------------|
| 1  | Canada                   | Venomous animal contact                         | 0 (0 to 0)  | 0 (0 to 0)  | -4.5% (-9.9% to 0.9%)     |
| 2  | Central African Republic | Adverse effects of medical treatment            | 0 (0 to 0)  | 0 (0 to 0)  | 0% (0% to 0%)             |
| 3  | Central African Republic | Conflict and terrorism                          | 0 (0 to 0)  | 3 (1 to 10) | NA                        |
| 4  | Central African Republic | Cyclist road injuries                           | 0 (0 to 0)  | 0 (0 to 0)  | 9.9% (2.6% to 19.5%)      |
| 5  | Central African Republic | Drowning                                        | 0 (0 to 0)  | 0 (0 to 0)  | -17.5% (-23.4% to -11%)   |
| 6  | Central African Republic | Environmental heat and cold exposure            | 0 (0 to 0)  | 0 (0 to 0)  | -3.4% (-7.6% to 1.1%)     |
| 7  | Central African Republic | Executions and police conflict                  | 0 (0 to 0)  | 0 (0 to 0)  | NA                        |
| 8  | Central African Republic | Exposure to forces of nature                    | 0 (0 to 0)  | 0 (0 to 0)  | NA                        |
| 9  | Central African Republic | Falls                                           | 1 (1 to 1)  | 1 (1 to 1)  | -2.5% (-6% to 1%)         |
| 10 | Central African Republic | Fire, heat, and hot substances                  | 0 (0 to 0)  | 0 (0 to 0)  | -8.5% (-12.6% to -4.1%)   |
| 11 | Central African Republic | Foreign body in eyes                            | 0 (0 to 0)  | 0 (0 to 0)  | 0% (0% to 0%)             |
| 12 | Central African Republic | Foreign body in other body part                 | 0 (0 to 1)  | 0 (0 to 1)  | -1.4% (-5.5% to 2.3%)     |
| 13 | Central African Republic | Motor vehicle road injuries                     | 0 (0 to 1)  | 1 (0 to 1)  | 0.6% (-6% to 8.1%)        |
| 14 | Central African Republic | Motorcyclist road injuries                      | 0 (0 to 0)  | 0 (0 to 0)  | 21% (9.9% to 33.9%)       |
| 15 | Central African Republic | Non-venomous animal contact                     | 0 (0 to 0)  | 0 (0 to 0)  | 1.6% (-3% to 6.9%)        |
| 16 | Central African Republic | Other exposure to mechanical forces             | 0 (0 to 0)  | 0 (0 to 0)  | -13.2% (-18.7% to -7.2%)  |
| 17 | Central African Republic | Other road injuries                             | 0 (0 to 0)  | 0 (0 to 0)  | 7.4% (-0.9% to 17.1%)     |
| 18 | Central African Republic | Other transport injuries                        | 0 (0 to 0)  | 0 (0 to 0)  | 1.7% (-2.4% to 5.9%)      |
| 19 | Central African Republic | Other unintentional injuries                    | 0 (0 to 0)  | 0 (0 to 0)  | -13% (-17.1% to -8.4%)    |
| 20 | Central African Republic | Pedestrian road injuries                        | 0 (0 to 1)  | 0 (0 to 1)  | -7.9% (-13.3% to -1.8%)   |
| 21 | Central African Republic | Physical violence by firearm                    | 0 (0 to 0)  | 0 (0 to 0)  | 117.4% (91.7% to 150.9%)  |
| 22 | Central African Republic | Physical violence by other means                | 0 (0 to 0)  | 0 (0 to 0)  | 126.4% (98.7% to 155.9%)  |
| 23 | Central African Republic | Physical violence by sharp object               | 0 (0 to 0)  | 0 (0 to 0)  | 156.3% (124.1% to 193.4%) |
| 24 | Central African Republic | Poisoning by carbon monoxide                    | 0 (0 to 0)  | 0 (0 to 0)  | 2.3% (-8% to 13%)         |
| 25 | Central African Republic | Poisoning by other means                        | 0 (0 to 0)  | 0 (0 to 0)  | -14.4% (-20% to -8.5%)    |
| 26 | Central African Republic | Pulmonary aspiration and foreign body in airway | 0 (0 to 0)  | 0 (0 to 0)  | -3.1% (-12.4% to 7%)      |
| 27 | Central African Republic | Self-harm by firearm                            | 0 (0 to 0)  | 0 (0 to 0)  | -5.7% (-15.4% to 5.8%)    |
| 28 | Central African Republic | Self-harm by other specified means              | 0 (0 to 0)  | 0 (0 to 0)  | -11.6% (-15.8% to -7.3%)  |
| 29 | Central African Republic | Unintentional firearm injuries                  | 0 (0 to 0)  | 0 (0 to 0)  | -5.3% (-10.9% to 1.5%)    |
| 30 | Chad                     | Venomous animal contact                         | 0 (0 to 0)  | 0 (0 to 0)  | 13.7% (6.3% to 22.5%)     |
| 31 | Chad                     | Adverse effects of medical treatment            | 0 (0 to 0)  | 0 (0 to 0)  | 0% (0% to 0%)             |
| 32 | Chad                     | Conflict and terrorism                          | 3 (1 to 11) | 1 (0 to 2)  | NA                        |
| 33 | Chad                     | Cyclist road injuries                           | 1 (0 to 2)  | 1 (1 to 2)  | 21.5% (13.8% to 30.2%)    |
| 34 | Chad                     | Drowning                                        | 0 (0 to 0)  | 0 (0 to 0)  | -7.4% (-12.9% to -1.4%)   |
| 35 | Chad                     | Environmental heat and cold exposure            | 0 (0 to 0)  | 0 (0 to 0)  | 4.9% (0.2% to 10.4%)      |
| 36 | Chad                     | Executions and police conflict                  | 0 (0 to 0)  | 0 (0 to 0)  | NA                        |
| 37 | Chad                     | Exposure to forces of nature                    | 0 (0 to 0)  | 0 (0 to 0)  | NA                        |
| 38 | Chad                     | Falls                                           | 2 (2 to 3)  | 3 (2 to 4)  | 13.1% (9.2% to 16.9%)     |
| 39 | Chad                     | Fire, heat, and hot substances                  | 0 (0 to 0)  | 0 (0 to 0)  | 5.3% (0.1% to 10.9%)      |
| 40 | Chad                     | Foreign body in eyes                            | 0 (0 to 0)  | 0 (0 to 0)  | 0% (0% to 0%)             |
| 41 | Chad                     | Foreign body in other body part                 | 1 (0 to 1)  | 1 (0 to 1)  | 1.7% (-2.1% to 6.1%)      |
| 42 | Chad                     | Motor vehicle road injuries                     | 1 (1 to 3)  | 2 (1 to 3)  | 28.4% (19.5% to 38.5%)    |
| 43 | Chad                     | Motorcyclist road injuries                      | 0 (0 to 1)  | 1 (0 to 1)  | 50.4% (38.3% to 63.4%)    |

|    |       |                                                 |            |            |                           |
|----|-------|-------------------------------------------------|------------|------------|---------------------------|
| 1  |       |                                                 |            |            |                           |
| 2  | Chad  | Non-venomous animal contact                     | 0 (0 to 0) | 0 (0 to 1) | 4.6% (0.6% to 9.2%)       |
| 3  | Chad  | Other exposure to mechanical forces             | 0 (0 to 0) | 0 (0 to 0) | -2% (-6.5% to 2.9%)       |
| 4  | Chad  | Other road injuries                             | 0 (0 to 0) | 0 (0 to 0) | 11.9% (4% to 20.8%)       |
| 5  | Chad  | Other transport injuries                        | 0 (0 to 0) | 0 (0 to 0) | 0.9% (-3% to 5.6%)        |
| 6  | Chad  | Other unintentional injuries                    | 0 (0 to 1) | 0 (0 to 0) | -5.8% (-9.5% to -1.5%)    |
| 7  | Chad  | Pedestrian road injuries                        | 2 (1 to 3) | 2 (1 to 4) | 16.1% (9.2% to 22.8%)     |
| 8  | Chad  | Physical violence by firearm                    | 0 (0 to 0) | 0 (0 to 0) | 28.6% (18.1% to 39.9%)    |
| 9  | Chad  | Physical violence by other means                | 0 (0 to 0) | 0 (0 to 0) | 27.7% (20.5% to 35.6%)    |
| 10 | Chad  | Physical violence by sharp object               | 0 (0 to 0) | 0 (0 to 0) | 25.6% (16.2% to 36.2%)    |
| 11 | Chad  | Poisoning by carbon monoxide                    | 0 (0 to 0) | 0 (0 to 0) | 14% (2.2% to 27.3%)       |
| 12 | Chad  | Poisoning by other means                        | 0 (0 to 0) | 0 (0 to 0) | -5.7% (-11.6% to 1.4%)    |
| 13 | Chad  | Pulmonary aspiration and foreign body in airway | 0 (0 to 0) | 0 (0 to 0) | -5.4% (-14.6% to 3.4%)    |
| 14 | Chad  | Self-harm by firearm                            | 0 (0 to 0) | 0 (0 to 0) | 24.7% (11.3% to 40.4%)    |
| 15 | Chad  | Self-harm by other specified means              | 0 (0 to 0) | 0 (0 to 0) | 20.7% (15.7% to 26.8%)    |
| 16 | Chad  | Unintentional firearm injuries                  | 0 (0 to 0) | 0 (0 to 0) | -12.8% (-19% to -6.8%)    |
| 17 | Chile | Venomous animal contact                         | 0 (0 to 0) | 0 (0 to 0) | 6.6% (-0.4% to 14%)       |
| 18 | Chile | Adverse effects of medical treatment            | 0 (0 to 0) | 0 (0 to 0) | 0% (0% to 0%)             |
| 19 | Chile | Conflict and terrorism                          | 0 (0 to 0) | 0 (0 to 0) | NA                        |
| 20 | Chile | Cyclist road injuries                           | 0 (0 to 0) | 0 (0 to 0) | 20% (7.7% to 35.7%)       |
| 21 | Chile | Drowning                                        | 0 (0 to 0) | 0 (0 to 0) | 82.6% (59.2% to 107%)     |
| 22 | Chile | Environmental heat and cold exposure            | 0 (0 to 0) | 0 (0 to 0) | -16.8% (-22.3% to -11.9%) |
| 23 | Chile | Executions and police conflict                  | 0 (0 to 0) | 0 (0 to 0) | NA                        |
| 24 | Chile | Exposure to forces of nature                    | 0 (0 to 0) | 0 (0 to 0) | NA                        |
| 25 | Chile | Falls                                           | 3 (2 to 4) | 4 (3 to 6) | 29.9% (25.5% to 34.3%)    |
| 26 | Chile | Fire, heat, and hot substances                  | 0 (0 to 0) | 0 (0 to 0) | -28% (-34.9% to -21.6%)   |
| 27 | Chile | Foreign body in eyes                            | 0 (0 to 0) | 0 (0 to 0) | 0% (0% to 0%)             |
| 28 | Chile | Foreign body in other body part                 | 0 (0 to 0) | 0 (0 to 0) | 3.3% (0.2% to 7.2%)       |
| 29 | Chile | Motor vehicle road injuries                     | 1 (0 to 1) | 1 (0 to 1) | 0.7% (-8.9% to 11.5%)     |
| 30 | Chile | Motorcyclist road injuries                      | 0 (0 to 0) | 0 (0 to 0) | 66.8% (44.8% to 93.2%)    |
| 31 | Chile | Non-venomous animal contact                     | 0 (0 to 0) | 0 (0 to 0) | -19.2% (-22.2% to -15.8%) |
| 32 | Chile | Other exposure to mechanical forces             | 1 (0 to 2) | 1 (0 to 2) | 6.2% (-0.8% to 13.8%)     |
| 33 | Chile | Other road injuries                             | 0 (0 to 0) | 0 (0 to 0) | 7.3% (-4% to 21.1%)       |
| 34 | Chile | Other transport injuries                        | 0 (0 to 0) | 0 (0 to 0) | -8.4% (-14% to -3.4%)     |
| 35 | Chile | Other unintentional injuries                    | 0 (0 to 1) | 0 (0 to 0) | -12.7% (-18.8% to -6.4%)  |
| 36 | Chile | Pedestrian road injuries                        | 0 (0 to 0) | 0 (0 to 0) | -24.7% (-32.6% to -15.5%) |
| 37 | Chile | Physical violence by firearm                    | 0 (0 to 0) | 0 (0 to 0) | 181.5% (125.5% to 266.5%) |
| 38 | Chile | Physical violence by other means                | 0 (0 to 1) | 0 (0 to 0) | -44.3% (-56.2% to -31.8%) |
| 39 | Chile | Physical violence by sharp object               | 0 (0 to 0) | 0 (0 to 0) | 43% (15.1% to 82.5%)      |
| 40 | Chile | Poisoning by carbon monoxide                    | 0 (0 to 0) | 0 (0 to 0) | 36.7% (23.7% to 49.2%)    |
| 41 | Chile | Poisoning by other means                        | 0 (0 to 0) | 0 (0 to 0) | 7.2% (-0.6% to 14.7%)     |
| 42 | Chile | Pulmonary aspiration and foreign body in airway | 0 (0 to 0) | 0 (0 to 0) | -55.3% (-62.8% to -46.2%) |
| 43 | Chile | Self-harm by firearm                            | 0 (0 to 0) | 0 (0 to 0) | -36.2% (-47.7% to -25%)   |
| 44 | Chile | Self-harm by other specified means              | 0 (0 to 1) | 0 (0 to 0) | -13.8% (-18.5% to -8.9%)  |
| 45 |       |                                                 |            |            |                           |
| 46 |       |                                                 |            |            |                           |

|    |          |                                                 |            |             |                           |
|----|----------|-------------------------------------------------|------------|-------------|---------------------------|
| 1  |          |                                                 |            |             |                           |
| 2  | Chile    | Unintentional firearm injuries                  | 0 (0 to 0) | 0 (0 to 0)  | -13.4% (-24.8% to -3.5%)  |
| 3  | Chile    | Venomous animal contact                         | 0 (0 to 0) | 0 (0 to 0)  | -22.6% (-26.8% to -18.1%) |
| 4  | China    | Adverse effects of medical treatment            | 0 (0 to 0) | 0 (0 to 0)  | 0% (0% to 0%)             |
| 5  | China    | Conflict and terrorism                          | 0 (0 to 0) | 0 (0 to 0)  | NA                        |
| 6  | China    | Cyclist road injuries                           | 0 (0 to 1) | 1 (0 to 2)  | 101% (91% to 112.4%)      |
| 7  | China    | Drowning                                        | 0 (0 to 0) | 0 (0 to 0)  | 9.1% (-10.8% to 28.7%)    |
| 8  | China    | Environmental heat and cold exposure            | 0 (0 to 0) | 0 (0 to 0)  | -17.2% (-22.1% to -12.3%) |
| 9  | China    | Executions and police conflict                  | 0 (0 to 0) | 0 (0 to 0)  | NA                        |
| 10 | China    | Exposure to forces of nature                    | 0 (0 to 0) | 0 (0 to 0)  | NA                        |
| 11 | China    | Falls                                           | 6 (4 to 9) | 9 (6 to 13) | 41.5% (34.6% to 48.4%)    |
| 12 | China    | Fire, heat, and hot substances                  | 0 (0 to 0) | 0 (0 to 0)  | 9.5% (3.5% to 14.7%)      |
| 13 | China    | Foreign body in eyes                            | 0 (0 to 0) | 0 (0 to 0)  | 0% (0% to 0%)             |
| 14 | China    | Foreign body in other body part                 | 0 (0 to 1) | 0 (0 to 0)  | -35.7% (-40.5% to -30.4%) |
| 15 | China    | Motor vehicle road injuries                     | 0 (0 to 1) | 1 (0 to 1)  | 125.5% (114.4% to 139.4%) |
| 16 | China    | Motorcyclist road injuries                      | 1 (0 to 1) | 1 (0 to 2)  | 114.6% (102.4% to 128.5%) |
| 17 | China    | Non-venomous animal contact                     | 0 (0 to 0) | 0 (0 to 0)  | -40.8% (-43.2% to -38.4%) |
| 18 | China    | Other exposure to mechanical forces             | 0 (0 to 0) | 0 (0 to 0)  | 91% (74.2% to 115.1%)     |
| 19 | China    | Other road injuries                             | 0 (0 to 0) | 0 (0 to 0)  | 94.1% (83.3% to 106.1%)   |
| 20 | China    | Other transport injuries                        | 0 (0 to 1) | 0 (0 to 0)  | -23.9% (-28.7% to -18.8%) |
| 21 | China    | Other unintentional injuries                    | 0 (0 to 0) | 0 (0 to 0)  | -14.9% (-19.5% to -9.6%)  |
| 22 | China    | Pedestrian road injuries                        | 1 (0 to 1) | 1 (1 to 2)  | 59.8% (50.4% to 68.6%)    |
| 23 | China    | Physical violence by firearm                    | 0 (0 to 0) | 0 (0 to 0)  | 26.2% (2.5% to 47.2%)     |
| 24 | China    | Physical violence by other means                | 0 (0 to 1) | 0 (0 to 1)  | -6% (-11.2% to -0.9%)     |
| 25 | China    | Physical violence by sharp object               | 0 (0 to 0) | 0 (0 to 0)  | -29% (-36.8% to -22.3%)   |
| 26 | China    | Poisoning by carbon monoxide                    | 0 (0 to 0) | 0 (0 to 0)  | 53.5% (41.6% to 66.2%)    |
| 27 | China    | Poisoning by other means                        | 0 (0 to 0) | 0 (0 to 0)  | -0.9% (-6.6% to 4.5%)     |
| 28 | China    | Pulmonary aspiration and foreign body in airway | 0 (0 to 0) | 0 (0 to 0)  | -24.9% (-32.4% to -15.8%) |
| 29 | China    | Self-harm by firearm                            | 0 (0 to 0) | 0 (0 to 0)  | -8.3% (-27.7% to 25.6%)   |
| 30 | China    | Self-harm by other specified means              | 0 (0 to 0) | 0 (0 to 0)  | -63.6% (-70.8% to -55.8%) |
| 31 | China    | Unintentional firearm injuries                  | 0 (0 to 0) | 0 (0 to 0)  | -11.4% (-22.9% to -0.2%)  |
| 32 | China    | Venomous animal contact                         | 0 (0 to 0) | 0 (0 to 0)  | -49% (-53.3% to -43%)     |
| 33 | Colombia | Adverse effects of medical treatment            | 0 (0 to 0) | 0 (0 to 0)  | 0% (0% to 0%)             |
| 34 | Colombia | Conflict and terrorism                          | 2 (0 to 6) | 0 (0 to 0)  | NA                        |
| 35 | Colombia | Cyclist road injuries                           | 0 (0 to 1) | 0 (0 to 0)  | -12.2% (-23.5% to 1.1%)   |
| 36 | Colombia | Drowning                                        | 0 (0 to 0) | 0 (0 to 0)  | 66.6% (45.9% to 89.1%)    |
| 37 | Colombia | Environmental heat and cold exposure            | 0 (0 to 0) | 0 (0 to 0)  | -6.3% (-11.5% to -0.4%)   |
| 38 | Colombia | Executions and police conflict                  | 0 (0 to 0) | 0 (0 to 0)  | NA                        |
| 39 | Colombia | Exposure to forces of nature                    | 0 (0 to 0) | 0 (0 to 0)  | NA                        |
| 40 | Colombia | Falls                                           | 2 (2 to 3) | 2 (1 to 3)  | -16.3% (-21.6% to -10.9%) |
| 41 | Colombia | Fire, heat, and hot substances                  | 0 (0 to 0) | 0 (0 to 0)  | -26.3% (-34% to -18.3%)   |
| 42 | Colombia | Foreign body in eyes                            | 0 (0 to 0) | 0 (0 to 0)  | 0% (0% to 0%)             |
| 43 | Colombia | Foreign body in other body part                 | 0 (0 to 0) | 0 (0 to 0)  | -3.8% (-7.5% to 0.2%)     |
| 44 | Colombia | Motor vehicle road injuries                     | 1 (0 to 1) | 1 (0 to 1)  | -32.8% (-40.9% to -23.5%) |
| 45 |          |                                                 |            |             |                           |
| 46 |          |                                                 |            |             |                           |

|    |          |                                                 |            |            |                           |
|----|----------|-------------------------------------------------|------------|------------|---------------------------|
| 1  |          |                                                 |            |            |                           |
| 2  | Colombia | Motorcyclist road injuries                      | 0 (0 to 0) | 0 (0 to 1) | 100.5% (73.5% to 134.4%)  |
| 3  | Colombia | Non-venomous animal contact                     | 0 (0 to 0) | 0 (0 to 0) | -26.4% (-31.6% to -20.7%) |
| 4  | Colombia | Other exposure to mechanical forces             | 0 (0 to 1) | 0 (0 to 1) | -17.2% (-24.1% to -8.5%)  |
| 5  | Colombia | Other road injuries                             | 0 (0 to 0) | 0 (0 to 0) | -17.7% (-29% to -4.3%)    |
| 6  | Colombia | Other transport injuries                        | 0 (0 to 0) | 0 (0 to 0) | -9.7% (-13.4% to -5.5%)   |
| 7  | Colombia | Other unintentional injuries                    | 0 (0 to 0) | 0 (0 to 0) | -38.4% (-44.4% to -31.3%) |
| 8  | Colombia | Pedestrian road injuries                        | 1 (0 to 1) | 0 (0 to 0) | -57.7% (-63.7% to -51.3%) |
| 9  | Colombia | Physical violence by firearm                    | 1 (0 to 1) | 0 (0 to 1) | -37.3% (-66.5% to -14.1%) |
| 10 | Colombia | Physical violence by other means                | 0 (0 to 1) | 0 (0 to 0) | -48.3% (-65.6% to -36.5%) |
| 11 | Colombia | Physical violence by sharp object               | 1 (0 to 1) | 0 (0 to 1) | -50.3% (-70.6% to -34.1%) |
| 12 | Colombia | Poisoning by carbon monoxide                    | 0 (0 to 0) | 0 (0 to 0) | 32.9% (15.6% to 49.8%)    |
| 13 | Colombia | Poisoning by other means                        | 0 (0 to 0) | 0 (0 to 0) | -15.5% (-24.6% to -6.6%)  |
| 14 | Colombia | Pulmonary aspiration and foreign body in airway | 0 (0 to 0) | 0 (0 to 0) | -20.8% (-28.9% to -12.9%) |
| 15 | Colombia | Self-harm by firearm                            | 0 (0 to 0) | 0 (0 to 0) | 3.8% (-14.1% to 19.1%)    |
| 16 | Colombia | Self-harm by other specified means              | 0 (0 to 0) | 0 (0 to 0) | 51.6% (39.1% to 68%)      |
| 17 | Colombia | Unintentional firearm injuries                  | 0 (0 to 0) | 0 (0 to 0) | -30.1% (-39.4% to -22.1%) |
| 18 | Colombia | Venomous animal contact                         | 0 (0 to 0) | 0 (0 to 0) | -35.1% (-41.4% to -29.6%) |
| 19 | Comoros  | Adverse effects of medical treatment            | 0 (0 to 0) | 0 (0 to 0) | 0% (0% to 0%)             |
| 20 | Comoros  | Conflict and terrorism                          | 0 (0 to 0) | 0 (0 to 0) | NA                        |
| 21 | Comoros  | Cyclist road injuries                           | 2 (1 to 3) | 2 (1 to 4) | 15.4% (7.1% to 25.3%)     |
| 22 | Comoros  | Drowning                                        | 0 (0 to 0) | 0 (0 to 0) | -13.8% (-21% to -6.4%)    |
| 23 | Comoros  | Environmental heat and cold exposure            | 0 (0 to 0) | 0 (0 to 0) | -11.6% (-16.9% to -5.9%)  |
| 24 | Comoros  | Executions and police conflict                  | 0 (0 to 0) | 0 (0 to 0) | NA                        |
| 25 | Comoros  | Exposure to forces of nature                    | 0 (0 to 0) | 0 (0 to 0) | NA                        |
| 26 | Comoros  | Falls                                           | 3 (2 to 4) | 3 (2 to 5) | 23.2% (18.8% to 27.4%)    |
| 27 | Comoros  | Fire, heat, and hot substances                  | 0 (0 to 0) | 0 (0 to 0) | -17.8% (-22.6% to -13%)   |
| 28 | Comoros  | Foreign body in eyes                            | 0 (0 to 0) | 0 (0 to 0) | 0% (0% to 0%)             |
| 29 | Comoros  | Foreign body in other body part                 | 1 (0 to 1) | 1 (0 to 1) | 3.5% (-0.5% to 7.9%)      |
| 30 | Comoros  | Motor vehicle road injuries                     | 3 (1 to 5) | 3 (1 to 5) | 0.4% (-7.4% to 8.8%)      |
| 31 | Comoros  | Motorcyclist road injuries                      | 1 (0 to 2) | 1 (0 to 2) | -9.1% (-17.1% to -0.9%)   |
| 32 | Comoros  | Non-venomous animal contact                     | 1 (0 to 1) | 0 (0 to 1) | -18.5% (-23% to -13.4%)   |
| 33 | Comoros  | Other exposure to mechanical forces             | 0 (0 to 1) | 0 (0 to 1) | -16.7% (-21.3% to -11.2%) |
| 34 | Comoros  | Other road injuries                             | 0 (0 to 0) | 0 (0 to 0) | 23.7% (12.5% to 36.2%)    |
| 35 | Comoros  | Other transport injuries                        | 0 (0 to 1) | 0 (0 to 1) | -7.6% (-12.2% to -2.9%)   |
| 36 | Comoros  | Other unintentional injuries                    | 0 (0 to 1) | 0 (0 to 0) | -17.5% (-22.3% to -12.4%) |
| 37 | Comoros  | Pedestrian road injuries                        | 2 (1 to 4) | 2 (1 to 3) | -13.7% (-20.6% to -6.3%)  |
| 38 | Comoros  | Physical violence by firearm                    | 0 (0 to 0) | 0 (0 to 0) | 48.5% (32.3% to 65.4%)    |
| 39 | Comoros  | Physical violence by other means                | 0 (0 to 0) | 0 (0 to 0) | 25.2% (17.5% to 33.3%)    |
| 40 | Comoros  | Physical violence by sharp object               | 0 (0 to 0) | 0 (0 to 0) | 25.6% (16.2% to 35.6%)    |
| 41 | Comoros  | Poisoning by carbon monoxide                    | 0 (0 to 0) | 0 (0 to 0) | 22.3% (9% to 38.4%)       |
| 42 | Comoros  | Poisoning by other means                        | 0 (0 to 0) | 0 (0 to 0) | -24.5% (-30.7% to -16.4%) |
| 43 | Comoros  | Pulmonary aspiration and foreign body in airway | 0 (0 to 0) | 0 (0 to 0) | -6.7% (-16.1% to 4%)      |
| 44 | Comoros  | Self-harm by firearm                            | 0 (0 to 0) | 0 (0 to 0) | 25.5% (12.2% to 43.2%)    |
| 45 |          |                                                 |            |            |                           |
| 46 |          |                                                 |            |            |                           |

|    |              |                                                 |            |            |                           |
|----|--------------|-------------------------------------------------|------------|------------|---------------------------|
| 1  |              |                                                 |            |            |                           |
| 2  | Comoros      | Self-harm by other specified means              | 0 (0 to 0) | 0 (0 to 0) | 7.7% (2.7% to 12.6%)      |
| 3  | Comoros      | Unintentional firearm injuries                  | 0 (0 to 0) | 0 (0 to 0) | -21% (-27.6% to -13.1%)   |
| 4  | Comoros      | Venomous animal contact                         | 0 (0 to 0) | 0 (0 to 0) | -36.4% (-43.5% to -30.1%) |
| 5  | Congo        | Adverse effects of medical treatment            | 0 (0 to 0) | 0 (0 to 0) | 0% (0% to 0%)             |
| 6  | Congo        | Conflict and terrorism                          | 0 (0 to 0) | 0 (0 to 0) | NA                        |
| 7  | Congo        | Cyclist road injuries                           | 0 (0 to 0) | 0 (0 to 0) | 4.7% (-3% to 13.7%)       |
| 8  | Congo        | Drowning                                        | 0 (0 to 0) | 0 (0 to 0) | -26.8% (-33.2% to -19.7%) |
| 9  | Congo        | Environmental heat and cold exposure            | 0 (0 to 0) | 0 (0 to 0) | -7.9% (-13% to -2.5%)     |
| 10 | Congo        | Executions and police conflict                  | 0 (0 to 0) | 0 (0 to 0) | NA                        |
| 11 | Congo        | Exposure to forces of nature                    | 0 (0 to 0) | 0 (0 to 0) | NA                        |
| 12 | Congo        | Falls                                           | 1 (1 to 1) | 1 (1 to 1) | 12.4% (8.9% to 16.2%)     |
| 13 | Congo        | Fire, heat, and hot substances                  | 0 (0 to 0) | 0 (0 to 0) | -18.5% (-23.9% to -13.5%) |
| 14 | Congo        | Foreign body in eyes                            | 0 (0 to 0) | 0 (0 to 0) | 0% (0% to 0%)             |
| 15 | Congo        | Foreign body in other body part                 | 0 (0 to 1) | 0 (0 to 1) | -2.6% (-6.3% to 1.7%)     |
| 16 | Congo        | Motor vehicle road injuries                     | 1 (0 to 1) | 1 (0 to 1) | -6% (-11.7% to 0.9%)      |
| 17 | Congo        | Motorcyclist road injuries                      | 0 (0 to 0) | 0 (0 to 0) | -25.2% (-32.9% to -17.5%) |
| 18 | Congo        | Non-venomous animal contact                     | 0 (0 to 0) | 0 (0 to 0) | -10% (-14.2% to -5.4%)    |
| 19 | Congo        | Other exposure to mechanical forces             | 0 (0 to 0) | 0 (0 to 0) | -15.5% (-21.3% to -9.9%)  |
| 20 | Congo        | Other road injuries                             | 0 (0 to 0) | 0 (0 to 0) | 7.7% (-2.2% to 17.6%)     |
| 21 | Congo        | Other transport injuries                        | 0 (0 to 0) | 0 (0 to 0) | -19.2% (-24.3% to -14.3%) |
| 22 | Congo        | Other unintentional injuries                    | 0 (0 to 0) | 0 (0 to 0) | -13.9% (-20.1% to -8.1%)  |
| 23 | Congo        | Pedestrian road injuries                        | 1 (0 to 1) | 0 (0 to 1) | -20.6% (-26.5% to -14.9%) |
| 24 | Congo        | Physical violence by firearm                    | 0 (0 to 0) | 0 (0 to 0) | 2.4% (-7.7% to 14%)       |
| 25 | Congo        | Physical violence by other means                | 0 (0 to 0) | 0 (0 to 0) | -17.5% (-23% to -11.8%)   |
| 26 | Congo        | Physical violence by sharp object               | 0 (0 to 0) | 0 (0 to 0) | -17.8% (-23.4% to -11.6%) |
| 27 | Congo        | Poisoning by carbon monoxide                    | 0 (0 to 0) | 0 (0 to 0) | 13.8% (0.8% to 26.4%)     |
| 28 | Congo        | Poisoning by other means                        | 0 (0 to 0) | 0 (0 to 0) | -20.4% (-27.2% to -12.9%) |
| 29 | Congo        | Pulmonary aspiration and foreign body in airway | 0 (0 to 0) | 0 (0 to 0) | -22.7% (-29.9% to -14.4%) |
| 30 | Congo        | Self-harm by firearm                            | 0 (0 to 0) | 0 (0 to 0) | -6.3% (-16.8% to 7.8%)    |
| 31 | Congo        | Self-harm by other specified means              | 0 (0 to 0) | 0 (0 to 0) | -24.4% (-28.5% to -20.5%) |
| 32 | Congo        | Unintentional firearm injuries                  | 0 (0 to 0) | 0 (0 to 0) | -13.8% (-20.2% to -7.4%)  |
| 33 | Congo        | Venomous animal contact                         | 0 (0 to 0) | 0 (0 to 0) | -4.3% (-10.9% to 4%)      |
| 34 | Cook Islands | Adverse effects of medical treatment            | 0 (0 to 0) | 0 (0 to 0) | 0% (0% to 0%)             |
| 35 | Cook Islands | Conflict and terrorism                          | 0 (0 to 0) | 0 (0 to 0) | NA                        |
| 36 | Cook Islands | Cyclist road injuries                           | 1 (0 to 1) | 1 (0 to 1) | -13.9% (-20.4% to -5.6%)  |
| 37 | Cook Islands | Drowning                                        | 0 (0 to 0) | 0 (0 to 0) | 31.4% (19.1% to 43.9%)    |
| 38 | Cook Islands | Environmental heat and cold exposure            | 0 (0 to 0) | 0 (0 to 0) | 1.9% (-3.2% to 6.4%)      |
| 39 | Cook Islands | Executions and police conflict                  | 0 (0 to 0) | 0 (0 to 0) | NA                        |
| 40 | Cook Islands | Exposure to forces of nature                    | 2 (1 to 5) | 0 (0 to 0) | NA                        |
| 41 | Cook Islands | Falls                                           | 4 (3 to 6) | 6 (4 to 9) | 49.9% (45.1% to 54.9%)    |
| 42 | Cook Islands | Fire, heat, and hot substances                  | 0 (0 to 0) | 0 (0 to 0) | 10.2% (5.3% to 16.2%)     |
| 43 | Cook Islands | Foreign body in eyes                            | 0 (0 to 0) | 0 (0 to 0) | 0% (0% to 0%)             |
| 44 | Cook Islands | Foreign body in other body part                 | 0 (0 to 0) | 0 (0 to 0) | -2.3% (-6.5% to 2.7%)     |
| 45 |              |                                                 |            |            |                           |
| 46 |              |                                                 |            |            |                           |



|    |              |                                                 |            |            |                           |
|----|--------------|-------------------------------------------------|------------|------------|---------------------------|
| 1  |              |                                                 |            |            |                           |
| 2  | Cook Islands | Motor vehicle road injuries                     | 2 (1 to 3) | 1 (1 to 2) | -26.6% (-32.4% to -21%)   |
| 3  | Cook Islands | Motorcyclist road injuries                      | 1 (1 to 2) | 1 (0 to 2) | -17.1% (-23.3% to -9.3%)  |
| 4  | Cook Islands | Non-venomous animal contact                     | 0 (0 to 0) | 0 (0 to 0) | -15.9% (-19.8% to -12.1%) |
| 5  | Cook Islands | Other exposure to mechanical forces             | 0 (0 to 0) | 0 (0 to 0) | -2% (-7.2% to 2.1%)       |
| 6  | Cook Islands | Other road injuries                             | 0 (0 to 0) | 0 (0 to 0) | -22% (-29.6% to -13.7%)   |
| 7  | Cook Islands | Other transport injuries                        | 0 (0 to 1) | 0 (0 to 1) | -4.6% (-9% to 0%)         |
| 8  | Cook Islands | Other unintentional injuries                    | 0 (0 to 0) | 0 (0 to 0) | 4.4% (-0.4% to 8.2%)      |
| 9  | Cook Islands | Pedestrian road injuries                        | 1 (0 to 2) | 1 (0 to 1) | -25.9% (-32.1% to -19.7%) |
| 10 | Cook Islands | Physical violence by firearm                    | 0 (0 to 0) | 0 (0 to 0) | 27% (10.2% to 45.2%)      |
| 11 | Cook Islands | Physical violence by other means                | 0 (0 to 1) | 0 (0 to 1) | -18.2% (-23.4% to -12.9%) |
| 12 | Cook Islands | Physical violence by sharp object               | 0 (0 to 0) | 0 (0 to 0) | -27% (-36.5% to -17.7%)   |
| 13 | Cook Islands | Poisoning by carbon monoxide                    | 0 (0 to 0) | 0 (0 to 0) | 21.4% (11.7% to 32.2%)    |
| 14 | Cook Islands | Poisoning by other means                        | 0 (0 to 0) | 0 (0 to 0) | -9.5% (-16.9% to -2.9%)   |
| 15 | Cook Islands | Pulmonary aspiration and foreign body in airway | 0 (0 to 0) | 0 (0 to 0) | -4.7% (-13.9% to 5.7%)    |
| 16 | Cook Islands | Self-harm by firearm                            | 0 (0 to 0) | 0 (0 to 0) | 0.2% (-11.6% to 15.6%)    |
| 17 | Cook Islands | Self-harm by other specified means              | 0 (0 to 0) | 0 (0 to 0) | -20.2% (-25.6% to -14.1%) |
| 18 | Cook Islands | Unintentional firearm injuries                  | 0 (0 to 0) | 0 (0 to 0) | 3.4% (-4.7% to 11.7%)     |
| 19 | Costa Rica   | Venomous animal contact                         | 0 (0 to 0) | 0 (0 to 0) | -11.6% (-17.8% to -5.4%)  |
| 20 | Costa Rica   | Adverse effects of medical treatment            | 0 (0 to 0) | 0 (0 to 0) | 0% (0% to 0%)             |
| 21 | Costa Rica   | Conflict and terrorism                          | 0 (0 to 0) | 0 (0 to 0) | NA                        |
| 22 | Costa Rica   | Cyclist road injuries                           | 0 (0 to 0) | 0 (0 to 0) | -32.2% (-41.3% to -23.6%) |
| 23 | Costa Rica   | Drowning                                        | 0 (0 to 0) | 0 (0 to 0) | -0.2% (-11.2% to 10.5%)   |
| 24 | Costa Rica   | Environmental heat and cold exposure            | 0 (0 to 0) | 0 (0 to 0) | 4.4% (-0.9% to 8.8%)      |
| 25 | Costa Rica   | Executions and police conflict                  | 0 (0 to 0) | 0 (0 to 0) | NA                        |
| 26 | Costa Rica   | Exposure to forces of nature                    | 0 (0 to 0) | 0 (0 to 0) | NA                        |
| 27 | Costa Rica   | Falls                                           | 3 (2 to 4) | 3 (2 to 4) | -3.1% (-7.2% to 0.7%)     |
| 28 | Costa Rica   | Fire, heat, and hot substances                  | 0 (0 to 0) | 0 (0 to 0) | -7.2% (-14.1% to -0.7%)   |
| 29 | Costa Rica   | Foreign body in eyes                            | 0 (0 to 0) | 0 (0 to 0) | 0% (0% to 0%)             |
| 30 | Costa Rica   | Foreign body in other body part                 | 0 (0 to 0) | 0 (0 to 0) | -6.5% (-10.5% to -2.3%)   |
| 31 | Costa Rica   | Motor vehicle road injuries                     | 1 (0 to 1) | 1 (0 to 1) | -4% (-13.9% to 5.8%)      |
| 32 | Costa Rica   | Motorcyclist road injuries                      | 0 (0 to 0) | 0 (0 to 0) | 37.8% (20.5% to 58%)      |
| 33 | Costa Rica   | Non-venomous animal contact                     | 0 (0 to 0) | 0 (0 to 0) | -19.1% (-22.8% to -15.3%) |
| 34 | Costa Rica   | Other exposure to mechanical forces             | 0 (0 to 1) | 0 (0 to 1) | -0.2% (-7.4% to 6.3%)     |
| 35 | Costa Rica   | Other road injuries                             | 0 (0 to 0) | 0 (0 to 0) | -2.9% (-14.7% to 10.2%)   |
| 36 | Costa Rica   | Other transport injuries                        | 0 (0 to 0) | 0 (0 to 0) | 22.5% (14.9% to 29.9%)    |
| 37 | Costa Rica   | Other unintentional injuries                    | 0 (0 to 0) | 0 (0 to 0) | -5.4% (-9.7% to -0.3%)    |
| 38 | Costa Rica   | Pedestrian road injuries                        | 0 (0 to 1) | 0 (0 to 1) | -16.3% (-26% to -6.5%)    |
| 39 | Costa Rica   | Physical violence by firearm                    | 0 (0 to 0) | 0 (0 to 0) | 215.1% (158.3% to 302.8%) |
| 40 | Costa Rica   | Physical violence by other means                | 0 (0 to 0) | 0 (0 to 0) | 24.3% (7.6% to 41.5%)     |
| 41 | Costa Rica   | Physical violence by sharp object               | 0 (0 to 0) | 0 (0 to 0) | 25.8% (2.8% to 48.4%)     |
| 42 | Costa Rica   | Poisoning by carbon monoxide                    | 0 (0 to 0) | 0 (0 to 0) | 14.6% (4.9% to 25.4%)     |
| 43 | Costa Rica   | Poisoning by other means                        | 0 (0 to 0) | 0 (0 to 0) | -3.1% (-9.9% to 3.6%)     |
| 44 | Costa Rica   | Pulmonary aspiration and foreign body in airway | 0 (0 to 0) | 0 (0 to 0) | -23% (-30.5% to -15%)     |
| 45 |              |                                                 |            |            |                           |
| 46 |              |                                                 |            |            |                           |

|    |            |                                                 |             |              |                           |
|----|------------|-------------------------------------------------|-------------|--------------|---------------------------|
| 1  |            |                                                 |             |              |                           |
| 2  | Costa Rica | Self-harm by firearm                            | 0 (0 to 0)  | 0 (0 to 0)   | 4.3% (-7.7% to 15%)       |
| 3  | Costa Rica | Self-harm by other specified means              | 0 (0 to 0)  | 0 (0 to 0)   | 21.5% (14.1% to 30.6%)    |
| 4  | Costa Rica | Unintentional firearm injuries                  | 0 (0 to 0)  | 0 (0 to 0)   | 11% (2.9% to 19.9%)       |
| 5  | Costa Rica | Venomous animal contact                         | 0 (0 to 0)  | 0 (0 to 0)   | -15.7% (-20.1% to -11.1%) |
| 6  | Croatia    | Adverse effects of medical treatment            | 0 (0 to 0)  | 0 (0 to 0)   | 0% (0% to 0%)             |
| 7  | Croatia    | Conflict and terrorism                          | 0 (0 to 0)  | 0 (0 to 0)   | NA                        |
| 8  | Croatia    | Cyclist road injuries                           | 1 (0 to 1)  | 1 (0 to 1)   | -4.7% (-14.8% to 8.5%)    |
| 9  | Croatia    | Drowning                                        | 0 (0 to 0)  | 0 (0 to 0)   | 100.1% (79% to 123.2%)    |
| 10 | Croatia    | Environmental heat and cold exposure            | 0 (0 to 0)  | 0 (0 to 0)   | -24.3% (-29.7% to -19.1%) |
| 11 | Croatia    | Executions and police conflict                  | 0 (0 to 0)  | 0 (0 to 0)   | NA                        |
| 12 | Croatia    | Exposure to forces of nature                    | 0 (0 to 0)  | 0 (0 to 0)   | NA                        |
| 13 | Croatia    | Falls                                           | 7 (5 to 10) | 10 (7 to 13) | 35.8% (29.4% to 43.1%)    |
| 14 | Croatia    | Fire, heat, and hot substances                  | 0 (0 to 0)  | 0 (0 to 0)   | -10.5% (-15.7% to -4.3%)  |
| 15 | Croatia    | Foreign body in eyes                            | 0 (0 to 0)  | 0 (0 to 0)   | 0% (0% to 0%)             |
| 16 | Croatia    | Foreign body in other body part                 | 0 (0 to 0)  | 0 (0 to 0)   | -13% (-20% to -5.8%)      |
| 17 | Croatia    | Motor vehicle road injuries                     | 3 (1 to 4)  | 2 (1 to 3)   | -29.4% (-36.5% to -21.6%) |
| 18 | Croatia    | Motorcyclist road injuries                      | 0 (0 to 0)  | 0 (0 to 1)   | 37.2% (16.2% to 64.6%)    |
| 19 | Croatia    | Non-venomous animal contact                     | 0 (0 to 0)  | 0 (0 to 0)   | -21.9% (-28.7% to -15.2%) |
| 20 | Croatia    | Other exposure to mechanical forces             | 2 (1 to 3)  | 1 (1 to 2)   | -25.6% (-32.1% to -18.7%) |
| 21 | Croatia    | Other road injuries                             | 0 (0 to 0)  | 0 (0 to 0)   | 5% (-6.7% to 18.9%)       |
| 22 | Croatia    | Other transport injuries                        | 0 (0 to 0)  | 0 (0 to 0)   | -13% (-18.4% to -8.1%)    |
| 23 | Croatia    | Other unintentional injuries                    | 1 (0 to 1)  | 0 (0 to 0)   | -66.2% (-71.5% to -60.1%) |
| 24 | Croatia    | Pedestrian road injuries                        | 1 (0 to 2)  | 1 (0 to 1)   | -40.3% (-48.5% to -31.4%) |
| 25 | Croatia    | Physical violence by firearm                    | 0 (0 to 0)  | 0 (0 to 0)   | -41.3% (-54.8% to -27.1%) |
| 26 | Croatia    | Physical violence by other means                | 0 (0 to 1)  | 0 (0 to 0)   | -38.5% (-47.3% to -29.2%) |
| 27 | Croatia    | Physical violence by sharp object               | 0 (0 to 0)  | 0 (0 to 0)   | -45.4% (-54.4% to -36.7%) |
| 28 | Croatia    | Poisoning by carbon monoxide                    | 0 (0 to 0)  | 0 (0 to 0)   | 17.2% (4.5% to 30.6%)     |
| 29 | Croatia    | Poisoning by other means                        | 0 (0 to 0)  | 0 (0 to 0)   | -1.6% (-9.1% to 7.2%)     |
| 30 | Croatia    | Pulmonary aspiration and foreign body in airway | 0 (0 to 0)  | 0 (0 to 0)   | 3.4% (-4.1% to 11.8%)     |
| 31 | Croatia    | Self-harm by firearm                            | 0 (0 to 0)  | 0 (0 to 0)   | -30.7% (-39.1% to -19.8%) |
| 32 | Croatia    | Self-harm by other specified means              | 0 (0 to 1)  | 0 (0 to 0)   | -38.8% (-42.8% to -34.1%) |
| 33 | Croatia    | Unintentional firearm injuries                  | 0 (0 to 0)  | 0 (0 to 0)   | -52.8% (-62.1% to -44.5%) |
| 34 | Croatia    | Venomous animal contact                         | 0 (0 to 0)  | 0 (0 to 0)   | -26.2% (-35.1% to -15.9%) |
| 35 | Cuba       | Adverse effects of medical treatment            | 0 (0 to 0)  | 0 (0 to 0)   | 0% (0% to 0%)             |
| 36 | Cuba       | Conflict and terrorism                          | 0 (0 to 0)  | 0 (0 to 0)   | NA                        |
| 37 | Cuba       | Cyclist road injuries                           | 1 (0 to 1)  | 0 (0 to 1)   | -52.2% (-59.7% to -43.6%) |
| 38 | Cuba       | Drowning                                        | 0 (0 to 0)  | 0 (0 to 0)   | 60.1% (38.8% to 83%)      |
| 39 | Cuba       | Environmental heat and cold exposure            | 0 (0 to 0)  | 0 (0 to 0)   | 8.1% (2.9% to 13.4%)      |
| 40 | Cuba       | Executions and police conflict                  | 0 (0 to 0)  | 0 (0 to 0)   | NA                        |
| 41 | Cuba       | Exposure to forces of nature                    | 0 (0 to 0)  | 0 (0 to 0)   | NA                        |
| 42 | Cuba       | Falls                                           | 3 (2 to 4)  | 5 (3 to 7)   | 55.9% (48.3% to 63.9%)    |
| 43 | Cuba       | Fire, heat, and hot substances                  | 0 (0 to 0)  | 0 (0 to 0)   | 25.2% (13.8% to 37.2%)    |
| 44 | Cuba       | Foreign body in eyes                            | 0 (0 to 0)  | 0 (0 to 0)   | 0% (0% to 0%)             |
| 45 |            |                                                 |             |              |                           |
| 46 |            |                                                 |             |              |                           |

|    |        |                                                 |            |            |                           |
|----|--------|-------------------------------------------------|------------|------------|---------------------------|
| 1  |        |                                                 |            |            |                           |
| 2  | Cuba   | Foreign body in other body part                 | 0 (0 to 0) | 0 (0 to 0) | 34.6% (28.4% to 40.8%)    |
| 3  | Cuba   | Motor vehicle road injuries                     | 0 (0 to 1) | 0 (0 to 1) | -33.3% (-42% to -23.4%)   |
| 4  | Cuba   | Motorcyclist road injuries                      | 0 (0 to 0) | 0 (0 to 0) | -4.6% (-19.9% to 13.9%)   |
| 5  | Cuba   | Non-venomous animal contact                     | 0 (0 to 0) | 0 (0 to 0) | 35.3% (28% to 42.3%)      |
| 6  | Cuba   | Other exposure to mechanical forces             | 0 (0 to 1) | 0 (0 to 1) | 28.1% (14.5% to 39.8%)    |
| 7  | Cuba   | Other road injuries                             | 0 (0 to 0) | 0 (0 to 0) | 22.6% (5.5% to 43.8%)     |
| 8  | Cuba   | Other transport injuries                        | 0 (0 to 0) | 0 (0 to 0) | 42.9% (31.7% to 53.3%)    |
| 9  | Cuba   | Other unintentional injuries                    | 0 (0 to 0) | 0 (0 to 0) | 14.8% (6.8% to 21.8%)     |
| 10 | Cuba   | Pedestrian road injuries                        | 0 (0 to 0) | 0 (0 to 0) | -45.5% (-53.6% to -36.4%) |
| 11 | Cuba   | Physical violence by firearm                    | 0 (0 to 0) | 0 (0 to 0) | 50.4% (30.9% to 77.7%)    |
| 12 | Cuba   | Physical violence by other means                | 0 (0 to 0) | 0 (0 to 0) | -16.2% (-26.3% to -6%)    |
| 13 | Cuba   | Physical violence by sharp object               | 0 (0 to 0) | 0 (0 to 0) | -18.1% (-30% to -5%)      |
| 14 | Cuba   | Poisoning by carbon monoxide                    | 0 (0 to 0) | 0 (0 to 0) | 76.6% (59% to 98.9%)      |
| 15 | Cuba   | Poisoning by other means                        | 0 (0 to 0) | 0 (0 to 0) | 62.3% (51.4% to 72.6%)    |
| 16 | Cuba   | Pulmonary aspiration and foreign body in airway | 0 (0 to 0) | 0 (0 to 0) | -22.2% (-30.1% to -13.8%) |
| 17 | Cuba   | Self-harm by firearm                            | 0 (0 to 0) | 0 (0 to 0) | -24.8% (-35.4% to -11.8%) |
| 18 | Cuba   | Self-harm by other specified means              | 0 (0 to 0) | 0 (0 to 0) | -56% (-60.8% to -50.6%)   |
| 19 | Cuba   | Unintentional firearm injuries                  | 0 (0 to 0) | 0 (0 to 1) | 64.5% (51.2% to 82.1%)    |
| 20 | Cyprus | Venomous animal contact                         | 0 (0 to 0) | 0 (0 to 0) | 36.2% (26.6% to 46.1%)    |
| 21 | Cyprus | Adverse effects of medical treatment            | 0 (0 to 0) | 0 (0 to 0) | 0% (0% to 0%)             |
| 22 | Cyprus | Conflict and terrorism                          | 0 (0 to 0) | 0 (0 to 0) | NA                        |
| 23 | Cyprus | Cyclist road injuries                           | 0 (0 to 0) | 0 (0 to 0) | -23% (-30.6% to -14.9%)   |
| 24 | Cyprus | Drowning                                        | 0 (0 to 0) | 0 (0 to 0) | 96.2% (78.3% to 116.2%)   |
| 25 | Cyprus | Environmental heat and cold exposure            | 0 (0 to 0) | 0 (0 to 0) | -10.8% (-16.1% to -5.4%)  |
| 26 | Cyprus | Executions and police conflict                  | 0 (0 to 0) | 0 (0 to 0) | NA                        |
| 27 | Cyprus | Exposure to forces of nature                    | 0 (0 to 0) | 0 (0 to 0) | NA                        |
| 28 | Cyprus | Falls                                           | 5 (4 to 7) | 7 (5 to 9) | 23.2% (18% to 28%)        |
| 29 | Cyprus | Fire, heat, and hot substances                  | 0 (0 to 0) | 0 (0 to 0) | -11.5% (-17.3% to -6.6%)  |
| 30 | Cyprus | Foreign body in eyes                            | 0 (0 to 0) | 0 (0 to 0) | 0% (0% to 0%)             |
| 31 | Cyprus | Foreign body in other body part                 | 0 (0 to 0) | 0 (0 to 0) | 0.6% (-2.9% to 4.4%)      |
| 32 | Cyprus | Motor vehicle road injuries                     | 1 (0 to 1) | 0 (0 to 1) | -40.8% (-46.1% to -35.3%) |
| 33 | Cyprus | Motorcyclist road injuries                      | 0 (0 to 0) | 0 (0 to 0) | -34.9% (-43.4% to -24.6%) |
| 34 | Cyprus | Non-venomous animal contact                     | 0 (0 to 0) | 0 (0 to 0) | -9.7% (-13.6% to -6%)     |
| 35 | Cyprus | Other exposure to mechanical forces             | 1 (0 to 1) | 1 (0 to 1) | -21.1% (-28.6% to -15.3%) |
| 36 | Cyprus | Other road injuries                             | 0 (0 to 0) | 0 (0 to 0) | -12.8% (-21.6% to -3.7%)  |
| 37 | Cyprus | Other transport injuries                        | 0 (0 to 0) | 0 (0 to 0) | -39.8% (-46.2% to -33%)   |
| 38 | Cyprus | Other unintentional injuries                    | 0 (0 to 0) | 0 (0 to 0) | -10.8% (-15.5% to -6.5%)  |
| 39 | Cyprus | Pedestrian road injuries                        | 0 (0 to 0) | 0 (0 to 0) | -43.6% (-50.5% to -36.1%) |
| 40 | Cyprus | Physical violence by firearm                    | 0 (0 to 0) | 0 (0 to 0) | 50.2% (35.4% to 68.5%)    |
| 41 | Cyprus | Physical violence by other means                | 0 (0 to 0) | 0 (0 to 0) | -27.3% (-34.8% to -20.2%) |
| 42 | Cyprus | Physical violence by sharp object               | 0 (0 to 0) | 0 (0 to 0) | -20.9% (-29.7% to -11.8%) |
| 43 | Cyprus | Poisoning by carbon monoxide                    | 0 (0 to 0) | 0 (0 to 0) | 20.7% (10.6% to 31%)      |
| 44 | Cyprus | Poisoning by other means                        | 0 (0 to 0) | 0 (0 to 0) | -9.9% (-18.3% to -4%)     |
| 45 |        |                                                 |            |            |                           |
| 46 |        |                                                 |            |            |                           |

|    |               |                                                 |              |             |                           |
|----|---------------|-------------------------------------------------|--------------|-------------|---------------------------|
| 1  |               |                                                 |              |             |                           |
| 2  | Cyprus        | Pulmonary aspiration and foreign body in airway | 0 (0 to 0)   | 0 (0 to 0)  | -23.8% (-30% to -16.9%)   |
| 3  | Cyprus        | Self-harm by firearm                            | 0 (0 to 0)   | 0 (0 to 0)  | 9.5% (-2.5% to 22.3%)     |
| 4  | Cyprus        | Self-harm by other specified means              | 0 (0 to 0)   | 0 (0 to 0)  | -1.9% (-7.7% to 5%)       |
| 5  | Cyprus        | Unintentional firearm injuries                  | 0 (0 to 0)   | 0 (0 to 0)  | -23.9% (-34% to -14.9%)   |
| 6  | Cyprus        | Venomous animal contact                         | 0 (0 to 0)   | 0 (0 to 0)  | -13.1% (-19.6% to -7.9%)  |
| 7  | Czechia       | Adverse effects of medical treatment            | 0 (0 to 0)   | 0 (0 to 0)  | 0% (0% to 0%)             |
| 8  | Czechia       | Conflict and terrorism                          | 0 (0 to 0)   | 0 (0 to 0)  | NA                        |
| 9  | Czechia       | Cyclist road injuries                           | 1 (0 to 1)   | 1 (0 to 1)  | -8.3% (-19.5% to 4.9%)    |
| 10 | Czechia       | Drowning                                        | 0 (0 to 0)   | 0 (0 to 0)  | 85% (61% to 105.3%)       |
| 11 | Czechia       | Environmental heat and cold exposure            | 0 (0 to 0)   | 0 (0 to 0)  | 2.5% (-3.5% to 8.5%)      |
| 12 | Czechia       | Executions and police conflict                  | 0 (0 to 0)   | 0 (0 to 0)  | NA                        |
| 13 | Czechia       | Exposure to forces of nature                    | 0 (0 to 0)   | 0 (0 to 0)  | NA                        |
| 14 | Czechia       | Falls                                           | 10 (7 to 14) | 8 (5 to 10) | -25.2% (-30.7% to -19.4%) |
| 15 | Czechia       | Fire, heat, and hot substances                  | 0 (0 to 0)   | 0 (0 to 0)  | -4.5% (-10.6% to 0.4%)    |
| 16 | Czechia       | Foreign body in eyes                            | 0 (0 to 0)   | 0 (0 to 0)  | 0% (0% to 0%)             |
| 17 | Czechia       | Foreign body in other body part                 | 0 (0 to 0)   | 0 (0 to 0)  | 0.6% (-3.5% to 4.3%)      |
| 18 | Czechia       | Motor vehicle road injuries                     | 3 (1 to 4)   | 2 (1 to 3)  | -38.7% (-46.2% to -31.3%) |
| 19 | Czechia       | Motorcyclist road injuries                      | 0 (0 to 1)   | 0 (0 to 1)  | -5% (-19.4% to 12.4%)     |
| 20 | Czechia       | Non-venomous animal contact                     | 0 (0 to 0)   | 0 (0 to 0)  | -13.7% (-17.3% to -9.9%)  |
| 21 | Czechia       | Other exposure to mechanical forces             | 2 (1 to 3)   | 2 (1 to 3)  | -8.3% (-13.4% to -2.6%)   |
| 22 | Czechia       | Other road injuries                             | 0 (0 to 0)   | 0 (0 to 0)  | -1.1% (-13.2% to 13%)     |
| 23 | Czechia       | Other transport injuries                        | 0 (0 to 0)   | 0 (0 to 0)  | -17.2% (-22.6% to -11.7%) |
| 24 | Czechia       | Other unintentional injuries                    | 0 (0 to 1)   | 0 (0 to 1)  | -22.3% (-29.2% to -15%)   |
| 25 | Czechia       | Pedestrian road injuries                        | 0 (0 to 1)   | 0 (0 to 1)  | -11.6% (-22.9% to 1.3%)   |
| 26 | Czechia       | Physical violence by firearm                    | 0 (0 to 0)   | 0 (0 to 0)  | 60.9% (41.7% to 81.6%)    |
| 27 | Czechia       | Physical violence by other means                | 0 (0 to 1)   | 0 (0 to 1)  | -9.7% (-19.5% to -0.8%)   |
| 28 | Czechia       | Physical violence by sharp object               | 0 (0 to 0)   | 0 (0 to 0)  | -20.1% (-31.2% to -9.5%)  |
| 29 | Czechia       | Poisoning by carbon monoxide                    | 0 (0 to 0)   | 0 (0 to 0)  | -3.5% (-17.2% to 9.7%)    |
| 30 | Czechia       | Poisoning by other means                        | 0 (0 to 0)   | 0 (0 to 0)  | -4% (-13.6% to 4.7%)      |
| 31 | Czechia       | Pulmonary aspiration and foreign body in airway | 0 (0 to 0)   | 0 (0 to 0)  | -25.5% (-32.7% to -18%)   |
| 32 | Czechia       | Self-harm by firearm                            | 0 (0 to 0)   | 0 (0 to 0)  | -0.6% (-13.2% to 18.6%)   |
| 33 | Czechia       | Self-harm by other specified means              | 0 (0 to 1)   | 0 (0 to 1)  | -24.3% (-28.5% to -19.2%) |
| 34 | Czechia       | Unintentional firearm injuries                  | 0 (0 to 0)   | 0 (0 to 0)  | -2.3% (-10.4% to 6%)      |
| 35 | Czechia       | Venomous animal contact                         | 0 (0 to 0)   | 0 (0 to 0)  | -16.7% (-21.7% to -11.5%) |
| 36 | Côte d'Ivoire | Adverse effects of medical treatment            | 0 (0 to 0)   | 0 (0 to 0)  | 0% (0% to 0%)             |
| 37 | Côte d'Ivoire | Conflict and terrorism                          | 0 (0 to 0)   | 0 (0 to 0)  | NA                        |
| 38 | Côte d'Ivoire | Cyclist road injuries                           | 1 (1 to 2)   | 1 (1 to 3)  | 9.1% (1.8% to 17.6%)      |
| 39 | Côte d'Ivoire | Drowning                                        | 0 (0 to 0)   | 0 (0 to 0)  | -9.7% (-16.5% to -2.3%)   |
| 40 | Côte d'Ivoire | Environmental heat and cold exposure            | 0 (0 to 0)   | 0 (0 to 0)  | 1.5% (-2.6% to 6.9%)      |
| 41 | Côte d'Ivoire | Executions and police conflict                  | 0 (0 to 0)   | 0 (0 to 0)  | NA                        |
| 42 | Côte d'Ivoire | Exposure to forces of nature                    | 0 (0 to 0)   | 0 (0 to 0)  | NA                        |
| 43 | Côte d'Ivoire | Falls                                           | 3 (2 to 4)   | 3 (2 to 5)  | 10.9% (7.2% to 15%)       |
| 44 | Côte d'Ivoire | Fire, heat, and hot substances                  | 0 (0 to 0)   | 0 (0 to 0)  | -9.4% (-14.7% to -4%)     |
| 45 |               |                                                 |              |             |                           |
| 46 |               |                                                 |              |             |                           |

|    |                                       |                                                 |            |            |                           |
|----|---------------------------------------|-------------------------------------------------|------------|------------|---------------------------|
| 1  |                                       |                                                 |            |            |                           |
| 2  | Côte d'Ivoire                         | Foreign body in eyes                            | 0 (0 to 0) | 0 (0 to 0) | 0% (0% to 0%)             |
| 3  | Côte d'Ivoire                         | Foreign body in other body part                 | 1 (0 to 1) | 1 (0 to 1) | 1.7% (-1.9% to 5.3%)      |
| 4  | Côte d'Ivoire                         | Motor vehicle road injuries                     | 2 (1 to 3) | 2 (1 to 3) | 1.3% (-6.4% to 9.7%)      |
| 5  | Côte d'Ivoire                         | Motorcyclist road injuries                      | 1 (0 to 1) | 1 (0 to 1) | -0.8% (-8.8% to 7.9%)     |
| 6  | Côte d'Ivoire                         | Non-venomous animal contact                     | 0 (0 to 0) | 0 (0 to 0) | -9.2% (-13.3% to -4.9%)   |
| 7  | Côte d'Ivoire                         | Other exposure to mechanical forces             | 0 (0 to 0) | 0 (0 to 0) | -11.4% (-16% to -7.1%)    |
| 8  | Côte d'Ivoire                         | Other road injuries                             | 0 (0 to 0) | 0 (0 to 0) | 5.2% (-3.7% to 14%)       |
| 9  | Côte d'Ivoire                         | Other transport injuries                        | 0 (0 to 1) | 0 (0 to 0) | -7.9% (-11.6% to -4.2%)   |
| 10 | Côte d'Ivoire                         | Other unintentional injuries                    | 0 (0 to 1) | 0 (0 to 0) | -10.2% (-14.8% to -5.5%)  |
| 11 | Côte d'Ivoire                         | Pedestrian road injuries                        | 2 (1 to 4) | 2 (1 to 4) | -4.1% (-10.6% to 2.7%)    |
| 12 | Côte d'Ivoire                         | Physical violence by firearm                    | 0 (0 to 0) | 0 (0 to 0) | 4.6% (-6.4% to 19%)       |
| 13 | Côte d'Ivoire                         | Physical violence by other means                | 0 (0 to 0) | 0 (0 to 0) | -3.9% (-9.2% to 1.4%)     |
| 14 | Côte d'Ivoire                         | Physical violence by sharp object               | 0 (0 to 0) | 0 (0 to 0) | -6.9% (-13.8% to 0%)      |
| 15 | Côte d'Ivoire                         | Poisoning by carbon monoxide                    | 0 (0 to 0) | 0 (0 to 0) | 12.1% (1.3% to 23.5%)     |
| 16 | Côte d'Ivoire                         | Poisoning by other means                        | 0 (0 to 0) | 0 (0 to 0) | -13.5% (-19.5% to -7.1%)  |
| 17 | Côte d'Ivoire                         | Pulmonary aspiration and foreign body in airway | 0 (0 to 0) | 0 (0 to 0) | -6% (-15.4% to 3%)        |
| 18 | Côte d'Ivoire                         | Self-harm by firearm                            | 0 (0 to 0) | 0 (0 to 0) | 1.9% (-10.6% to 14.4%)    |
| 19 | Côte d'Ivoire                         | Self-harm by other specified means              | 0 (0 to 0) | 0 (0 to 0) | 0.7% (-4.2% to 5.5%)      |
| 20 | Côte d'Ivoire                         | Unintentional firearm injuries                  | 0 (0 to 0) | 0 (0 to 0) | -12.1% (-18.7% to -5.6%)  |
| 21 | Côte d'Ivoire                         | Venomous animal contact                         | 0 (0 to 0) | 0 (0 to 0) | -10% (-16.8% to -3.5%)    |
| 22 | Democratic People's Republic of Korea | Adverse effects of medical treatment            | 0 (0 to 0) | 0 (0 to 0) | 0% (0% to 0%)             |
| 23 | Democratic People's Republic of Korea | Conflict and terrorism                          | 0 (0 to 0) | 0 (0 to 0) | NA                        |
| 24 | Democratic People's Republic of Korea | Cyclist road injuries                           | 0 (0 to 0) | 0 (0 to 0) | 42.9% (30.5% to 57.4%)    |
| 25 | Democratic People's Republic of Korea | Drowning                                        | 0 (0 to 0) | 0 (0 to 0) | -22% (-32.7% to -8.9%)    |
| 26 | Democratic People's Republic of Korea | Environmental heat and cold exposure            | 0 (0 to 0) | 0 (0 to 0) | 3.5% (-1.6% to 8.9%)      |
| 27 | Democratic People's Republic of Korea | Executions and police conflict                  | 0 (0 to 0) | 0 (0 to 0) | NA                        |
| 28 | Democratic People's Republic of Korea | Exposure to forces of nature                    | 0 (0 to 0) | 0 (0 to 0) | NA                        |
| 29 | Democratic People's Republic of Korea | Falls                                           | 1 (1 to 2) | 1 (1 to 1) | -37.2% (-39.3% to -34.9%) |
| 30 | Democratic People's Republic of Korea | Fire, heat, and hot substances                  | 0 (0 to 0) | 0 (0 to 0) | -13.7% (-18.7% to -8.9%)  |
| 31 | Democratic People's Republic of Korea | Foreign body in eyes                            | 0 (0 to 0) | 0 (0 to 0) | 0% (0% to 0%)             |
| 32 | Democratic People's Republic of Korea | Foreign body in other body part                 | 0 (0 to 0) | 0 (0 to 0) | -5.4% (-9.5% to -1.1%)    |
| 33 | Democratic People's Republic of Korea | Motor vehicle road injuries                     | 0 (0 to 0) | 0 (0 to 0) | 18% (7.8% to 28.7%)       |
| 34 | Democratic People's Republic of Korea | Motorcyclist road injuries                      | 0 (0 to 1) | 0 (0 to 1) | 44.9% (32% to 58.5%)      |
| 35 | Democratic People's Republic of Korea | Non-venomous animal contact                     | 0 (0 to 0) | 0 (0 to 0) | -14.8% (-18.5% to -11.1%) |
| 36 | Democratic People's Republic of Korea | Other exposure to mechanical forces             | 0 (0 to 0) | 0 (0 to 0) | 75.2% (56.8% to 102.6%)   |
| 37 | Democratic People's Republic of Korea | Other road injuries                             | 0 (0 to 0) | 0 (0 to 0) | 12.3% (2.4% to 24%)       |
| 38 | Democratic People's Republic of Korea | Other transport injuries                        | 0 (0 to 0) | 0 (0 to 0) | -4.9% (-8.4% to -0.9%)    |
| 39 | Democratic People's Republic of Korea | Other unintentional injuries                    | 0 (0 to 0) | 0 (0 to 0) | 2.9% (-2.3% to 9.5%)      |
| 40 | Democratic People's Republic of Korea | Pedestrian road injuries                        | 0 (0 to 0) | 0 (0 to 0) | 16% (6.8% to 26.2%)       |
| 41 | Democratic People's Republic of Korea | Physical violence by firearm                    | 0 (0 to 0) | 0 (0 to 0) | 8.1% (-3.5% to 19.3%)     |
| 42 | Democratic People's Republic of Korea | Physical violence by other means                | 0 (0 to 0) | 0 (0 to 0) | 20.5% (12.3% to 30.5%)    |
| 43 | Democratic People's Republic of Korea | Physical violence by sharp object               | 0 (0 to 0) | 0 (0 to 0) | 4.8% (-4.5% to 14.3%)     |
| 44 | Democratic People's Republic of Korea | Poisoning by carbon monoxide                    | 0 (0 to 0) | 0 (0 to 0) | 18.2% (8.4% to 29.9%)     |
| 45 |                                       |                                                 |            |            |                           |
| 46 |                                       |                                                 |            |            |                           |

|    |                                       |                                                 |             |            |                           |
|----|---------------------------------------|-------------------------------------------------|-------------|------------|---------------------------|
| 1  |                                       |                                                 |             |            |                           |
| 2  | Democratic People's Republic of Korea | Poisoning by other means                        | 0 (0 to 0)  | 0 (0 to 0) | -10.1% (-16.9% to -2.3%)  |
| 3  | Democratic People's Republic of Korea | Pulmonary aspiration and foreign body in airway | 0 (0 to 0)  | 0 (0 to 0) | 18.2% (2.5% to 35.6%)     |
| 4  | Democratic People's Republic of Korea | Self-harm by firearm                            | 0 (0 to 0)  | 0 (0 to 0) | -29.2% (-35.3% to -20.3%) |
| 5  | Democratic People's Republic of Korea | Self-harm by other specified means              | 0 (0 to 0)  | 0 (0 to 0) | -44.1% (-48.1% to -39.9%) |
| 6  | Democratic People's Republic of Korea | Unintentional firearm injuries                  | 0 (0 to 0)  | 0 (0 to 0) | 5.9% (-6.9% to 17.4%)     |
| 7  | Democratic People's Republic of Korea | Venomous animal contact                         | 0 (0 to 0)  | 0 (0 to 0) | -7.9% (-14.4% to -0.4%)   |
| 8  | Democratic Republic of the Congo      | Adverse effects of medical treatment            | 0 (0 to 0)  | 0 (0 to 0) | 0% (0% to 0%)             |
| 9  | Democratic Republic of the Congo      | Conflict and terrorism                          | 0 (0 to 1)  | 1 (0 to 3) | NA                        |
| 10 | Democratic Republic of the Congo      | Cyclist road injuries                           | 0 (0 to 0)  | 0 (0 to 0) | -7.1% (-13.4% to -0.8%)   |
| 11 | Democratic Republic of the Congo      | Drowning                                        | 0 (0 to 0)  | 0 (0 to 0) | -25.8% (-32.4% to -18%)   |
| 12 | Democratic Republic of the Congo      | Environmental heat and cold exposure            | 0 (0 to 0)  | 0 (0 to 0) | -3.1% (-8.5% to 2.2%)     |
| 13 | Democratic Republic of the Congo      | Executions and police conflict                  | 0 (0 to 0)  | 0 (0 to 0) | NA                        |
| 14 | Democratic Republic of the Congo      | Exposure to forces of nature                    | 0 (0 to 0)  | 0 (0 to 0) | NA                        |
| 15 | Democratic Republic of the Congo      | Falls                                           | 1 (1 to 1)  | 1 (1 to 1) | 20.5% (16.2% to 25.2%)    |
| 16 | Democratic Republic of the Congo      | Fire, heat, and hot substances                  | 0 (0 to 0)  | 0 (0 to 0) | -9.4% (-14.3% to -4.8%)   |
| 17 | Democratic Republic of the Congo      | Foreign body in eyes                            | 0 (0 to 0)  | 0 (0 to 0) | 0% (0% to 0%)             |
| 18 | Democratic Republic of the Congo      | Foreign body in other body part                 | 0 (0 to 1)  | 0 (0 to 1) | -4.5% (-8.1% to -0.3%)    |
| 19 | Democratic Republic of the Congo      | Motor vehicle road injuries                     | 1 (0 to 1)  | 1 (0 to 1) | -12.9% (-18.3% to -7.3%)  |
| 20 | Democratic Republic of the Congo      | Motorcyclist road injuries                      | 0 (0 to 0)  | 0 (0 to 0) | -9.9% (-19% to -0.6%)     |
| 21 | Democratic Republic of the Congo      | Non-venomous animal contact                     | 0 (0 to 0)  | 0 (0 to 0) | 3.2% (-1.4% to 7.5%)      |
| 22 | Democratic Republic of the Congo      | Other exposure to mechanical forces             | 0 (0 to 0)  | 0 (0 to 0) | -7.2% (-12.5% to -2%)     |
| 23 | Democratic Republic of the Congo      | Other road injuries                             | 0 (0 to 0)  | 0 (0 to 0) | -1.2% (-9.2% to 8%)       |
| 24 | Democratic Republic of the Congo      | Other transport injuries                        | 0 (0 to 0)  | 0 (0 to 0) | 1.2% (-2.7% to 5.4%)      |
| 25 | Democratic Republic of the Congo      | Other unintentional injuries                    | 0 (0 to 0)  | 0 (0 to 0) | -5.8% (-10.4% to -0.4%)   |
| 26 | Democratic Republic of the Congo      | Pedestrian road injuries                        | 0 (0 to 1)  | 0 (0 to 1) | -5.9% (-11.4% to 0.1%)    |
| 27 | Democratic Republic of the Congo      | Physical violence by firearm                    | 0 (0 to 0)  | 0 (0 to 0) | 2.2% (-6.9% to 12.9%)     |
| 28 | Democratic Republic of the Congo      | Physical violence by other means                | 0 (0 to 0)  | 0 (0 to 0) | -11% (-16.9% to -4.6%)    |
| 29 | Democratic Republic of the Congo      | Physical violence by sharp object               | 0 (0 to 0)  | 0 (0 to 0) | -6.6% (-13.6% to 0.6%)    |
| 30 | Democratic Republic of the Congo      | Poisoning by carbon monoxide                    | 0 (0 to 0)  | 0 (0 to 0) | 10% (-1.4% to 22%)        |
| 31 | Democratic Republic of the Congo      | Poisoning by other means                        | 0 (0 to 0)  | 0 (0 to 0) | -19.6% (-26.1% to -12.8%) |
| 32 | Democratic Republic of the Congo      | Pulmonary aspiration and foreign body in airway | 0 (0 to 0)  | 0 (0 to 0) | -11.7% (-19.6% to -1.7%)  |
| 33 | Democratic Republic of the Congo      | Self-harm by firearm                            | 0 (0 to 0)  | 0 (0 to 0) | 13.5% (1.8% to 28%)       |
| 34 | Democratic Republic of the Congo      | Self-harm by other specified means              | 0 (0 to 0)  | 0 (0 to 0) | 0.4% (-4.6% to 5.2%)      |
| 35 | Democratic Republic of the Congo      | Unintentional firearm injuries                  | 0 (0 to 0)  | 0 (0 to 0) | -10% (-15.5% to -4.1%)    |
| 36 | Democratic Republic of the Congo      | Venomous animal contact                         | 0 (0 to 0)  | 0 (0 to 0) | 8.8% (1.4% to 17.3%)      |
| 37 | Denmark                               | Adverse effects of medical treatment            | 0 (0 to 0)  | 0 (0 to 0) | 0% (0% to 0%)             |
| 38 | Denmark                               | Conflict and terrorism                          | 0 (0 to 0)  | 0 (0 to 0) | NA                        |
| 39 | Denmark                               | Cyclist road injuries                           | 0 (0 to 1)  | 0 (0 to 0) | -49.6% (-57.2% to -41.8%) |
| 40 | Denmark                               | Drowning                                        | 0 (0 to 0)  | 0 (0 to 0) | 73.8% (58.1% to 90.3%)    |
| 41 | Denmark                               | Environmental heat and cold exposure            | 0 (0 to 0)  | 0 (0 to 0) | 1.7% (-1.7% to 5.5%)      |
| 42 | Denmark                               | Executions and police conflict                  | 0 (0 to 0)  | 0 (0 to 0) | NA                        |
| 43 | Denmark                               | Exposure to forces of nature                    | 0 (0 to 0)  | 0 (0 to 0) | NA                        |
| 44 | Denmark                               | Falls                                           | 8 (5 to 11) | 6 (4 to 8) | -21.5% (-27.2% to -14.9%) |
| 45 |                                       |                                                 |             |            |                           |
| 46 |                                       |                                                 |             |            |                           |

|    |          |                                                 |             |            |                           |
|----|----------|-------------------------------------------------|-------------|------------|---------------------------|
| 1  |          |                                                 |             |            |                           |
| 2  | Denmark  | Fire, heat, and hot substances                  | 0 (0 to 0)  | 0 (0 to 0) | -13.8% (-18.6% to -9.4%)  |
| 3  | Denmark  | Foreign body in eyes                            | 0 (0 to 0)  | 0 (0 to 0) | 0% (0% to 0%)             |
| 4  | Denmark  | Foreign body in other body part                 | 0 (0 to 0)  | 0 (0 to 0) | 0.2% (-3.1% to 3.6%)      |
| 5  | Denmark  | Motor vehicle road injuries                     | 1 (0 to 1)  | 0 (0 to 1) | -46.7% (-54.4% to -39.4%) |
| 6  | Denmark  | Motorcyclist road injuries                      | 0 (0 to 0)  | 0 (0 to 0) | -21.1% (-35.2% to -4.9%)  |
| 7  | Denmark  | Non-venomous animal contact                     | 0 (0 to 0)  | 0 (0 to 0) | -4.4% (-7.8% to -0.1%)    |
| 8  | Denmark  | Other exposure to mechanical forces             | 1 (0 to 1)  | 0 (0 to 1) | -8.4% (-16.1% to -2.4%)   |
| 9  | Denmark  | Other road injuries                             | 0 (0 to 0)  | 0 (0 to 0) | -6% (-19.7% to 9.2%)      |
| 10 | Denmark  | Other transport injuries                        | 0 (0 to 0)  | 0 (0 to 0) | -17.1% (-24.2% to -10.4%) |
| 11 | Denmark  | Other unintentional injuries                    | 0 (0 to 1)  | 0 (0 to 0) | -26.5% (-33.4% to -20.4%) |
| 12 | Denmark  | Pedestrian road injuries                        | 0 (0 to 0)  | 0 (0 to 0) | -26.8% (-40% to -12.8%)   |
| 13 | Denmark  | Physical violence by firearm                    | 0 (0 to 0)  | 0 (0 to 0) | 24.2% (10.8% to 41.7%)    |
| 14 | Denmark  | Physical violence by other means                | 0 (0 to 0)  | 0 (0 to 0) | -26.6% (-35.1% to -18.9%) |
| 15 | Denmark  | Physical violence by sharp object               | 0 (0 to 0)  | 0 (0 to 0) | -22.1% (-33% to -12.1%)   |
| 16 | Denmark  | Poisoning by carbon monoxide                    | 0 (0 to 0)  | 0 (0 to 0) | 18.9% (8.8% to 29.6%)     |
| 17 | Denmark  | Poisoning by other means                        | 0 (0 to 0)  | 0 (0 to 0) | -1% (-7.4% to 6%)         |
| 18 | Denmark  | Pulmonary aspiration and foreign body in airway | 0 (0 to 0)  | 0 (0 to 0) | -4.1% (-12.7% to 4.6%)    |
| 19 | Denmark  | Self-harm by firearm                            | 0 (0 to 0)  | 0 (0 to 0) | -38.1% (-48.1% to -28.5%) |
| 20 | Denmark  | Self-harm by other specified means              | 0 (0 to 1)  | 0 (0 to 0) | -56% (-59.4% to -52.8%)   |
| 21 | Denmark  | Unintentional firearm injuries                  | 0 (0 to 0)  | 0 (0 to 0) | 3.4% (-6.5% to 12.7%)     |
| 22 | Denmark  | Venomous animal contact                         | 0 (0 to 0)  | 0 (0 to 0) | -6.7% (-12.3% to -1.3%)   |
| 23 | Djibouti | Adverse effects of medical treatment            | 0 (0 to 0)  | 0 (0 to 0) | 0% (0% to 0%)             |
| 24 | Djibouti | Conflict and terrorism                          | 4 (1 to 11) | 0 (0 to 0) | NA                        |
| 25 | Djibouti | Cyclist road injuries                           | 1 (1 to 3)  | 1 (1 to 3) | 10.7% (3.2% to 18.9%)     |
| 26 | Djibouti | Drowning                                        | 0 (0 to 0)  | 0 (0 to 0) | -2.8% (-10.7% to 5.2%)    |
| 27 | Djibouti | Environmental heat and cold exposure            | 0 (0 to 0)  | 0 (0 to 0) | -8.3% (-13.3% to -2.5%)   |
| 28 | Djibouti | Executions and police conflict                  | 0 (0 to 0)  | 0 (0 to 0) | NA                        |
| 29 | Djibouti | Exposure to forces of nature                    | 0 (0 to 0)  | 0 (0 to 0) | NA                        |
| 30 | Djibouti | Falls                                           | 3 (2 to 4)  | 4 (3 to 5) | 18.4% (14.2% to 23%)      |
| 31 | Djibouti | Fire, heat, and hot substances                  | 0 (0 to 0)  | 0 (0 to 0) | -14.4% (-19.3% to -9.8%)  |
| 32 | Djibouti | Foreign body in eyes                            | 0 (0 to 0)  | 0 (0 to 0) | 0% (0% to 0%)             |
| 33 | Djibouti | Foreign body in other body part                 | 1 (0 to 1)  | 1 (0 to 1) | 1.3% (-2.7% to 5.3%)      |
| 34 | Djibouti | Motor vehicle road injuries                     | 1 (1 to 3)  | 1 (1 to 3) | -6.1% (-12.9% to 1.5%)    |
| 35 | Djibouti | Motorcyclist road injuries                      | 1 (0 to 1)  | 1 (0 to 1) | 15.5% (6% to 25.7%)       |
| 36 | Djibouti | Non-venomous animal contact                     | 0 (0 to 1)  | 0 (0 to 1) | -5% (-9% to -0.4%)        |
| 37 | Djibouti | Other exposure to mechanical forces             | 0 (0 to 1)  | 0 (0 to 1) | -12.8% (-17.5% to -8.4%)  |
| 38 | Djibouti | Other road injuries                             | 0 (0 to 0)  | 0 (0 to 0) | 11% (1.9% to 20.3%)       |
| 39 | Djibouti | Other transport injuries                        | 0 (0 to 1)  | 0 (0 to 1) | -4% (-8% to 0.2%)         |
| 40 | Djibouti | Other unintentional injuries                    | 0 (0 to 1)  | 0 (0 to 0) | -14.2% (-18.4% to -9.5%)  |
| 41 | Djibouti | Pedestrian road injuries                        | 2 (1 to 5)  | 2 (1 to 4) | -14.9% (-20.5% to -9.1%)  |
| 42 | Djibouti | Physical violence by firearm                    | 0 (0 to 0)  | 0 (0 to 0) | 36.1% (22.5% to 53.5%)    |
| 43 | Djibouti | Physical violence by other means                | 0 (0 to 0)  | 0 (0 to 0) | 2.7% (-4.2% to 10.9%)     |
| 44 | Djibouti | Physical violence by sharp object               | 0 (0 to 0)  | 0 (0 to 0) | 4% (-5% to 12.3%)         |
| 45 |          |                                                 |             |            |                           |
| 46 |          |                                                 |             |            |                           |

|    |                    |                                                 |            |            |                           |
|----|--------------------|-------------------------------------------------|------------|------------|---------------------------|
| 1  |                    |                                                 |            |            |                           |
| 2  | Djibouti           | Poisoning by carbon monoxide                    | 0 (0 to 0) | 0 (0 to 0) | 19.4% (7.3% to 34.5%)     |
| 3  | Djibouti           | Poisoning by other means                        | 0 (0 to 0) | 0 (0 to 0) | -19.6% (-25.9% to -12%)   |
| 4  | Djibouti           | Pulmonary aspiration and foreign body in airway | 0 (0 to 0) | 0 (0 to 0) | -11.9% (-20.9% to -1.7%)  |
| 5  | Djibouti           | Self-harm by firearm                            | 0 (0 to 0) | 0 (0 to 0) | 34% (20.2% to 55.1%)      |
| 6  | Djibouti           | Self-harm by other specified means              | 0 (0 to 0) | 0 (0 to 0) | 13.4% (8.1% to 20.1%)     |
| 7  | Djibouti           | Unintentional firearm injuries                  | 0 (0 to 0) | 0 (0 to 0) | -20.7% (-27.5% to -14.6%) |
| 8  | Djibouti           | Venomous animal contact                         | 0 (0 to 0) | 0 (0 to 0) | -9.8% (-15.5% to -3.7%)   |
| 9  | Dominica           | Adverse effects of medical treatment            | 0 (0 to 0) | 0 (0 to 0) | 0% (0% to 0%)             |
| 10 | Dominica           | Conflict and terrorism                          | 0 (0 to 0) | 0 (0 to 0) | NA                        |
| 11 | Dominica           | Cyclist road injuries                           | 0 (0 to 1) | 0 (0 to 0) | -13.6% (-21.3% to -5.3%)  |
| 12 | Dominica           | Drowning                                        | 0 (0 to 0) | 0 (0 to 0) | 9.6% (0.3% to 18.9%)      |
| 13 | Dominica           | Environmental heat and cold exposure            | 0 (0 to 0) | 0 (0 to 1) | 5.1% (1% to 9.6%)         |
| 14 | Dominica           | Executions and police conflict                  | 0 (0 to 0) | 0 (0 to 0) | NA                        |
| 15 | Dominica           | Exposure to forces of nature                    | 0 (0 to 0) | 0 (0 to 0) | NA                        |
| 16 | Dominica           | Falls                                           | 1 (1 to 1) | 1 (1 to 2) | 32.3% (27.3% to 36.9%)    |
| 17 | Dominica           | Fire, heat, and hot substances                  | 0 (0 to 0) | 0 (0 to 0) | -8.7% (-13% to -4.7%)     |
| 18 | Dominica           | Foreign body in eyes                            | 0 (0 to 0) | 0 (0 to 0) | 0% (0% to 0%)             |
| 19 | Dominica           | Foreign body in other body part                 | 0 (0 to 0) | 0 (0 to 0) | -3.8% (-7.3% to 0.2%)     |
| 20 | Dominica           | Motor vehicle road injuries                     | 1 (0 to 1) | 0 (0 to 1) | -12.6% (-20.8% to -4.1%)  |
| 21 | Dominica           | Motorcyclist road injuries                      | 0 (0 to 1) | 0 (0 to 1) | 18.7% (5.4% to 33%)       |
| 22 | Dominica           | Non-venomous animal contact                     | 0 (0 to 0) | 0 (0 to 0) | -7.5% (-12.3% to -2%)     |
| 23 | Dominica           | Other exposure to mechanical forces             | 0 (0 to 0) | 0 (0 to 1) | 19.9% (13.1% to 27.6%)    |
| 24 | Dominica           | Other road injuries                             | 0 (0 to 0) | 0 (0 to 0) | -9.6% (-18% to -0.2%)     |
| 25 | Dominica           | Other transport injuries                        | 0 (0 to 0) | 0 (0 to 0) | 2.7% (-2% to 7.1%)        |
| 26 | Dominica           | Other unintentional injuries                    | 0 (0 to 0) | 0 (0 to 0) | -2.3% (-7.4% to 3%)       |
| 27 | Dominica           | Pedestrian road injuries                        | 0 (0 to 0) | 0 (0 to 0) | -21.7% (-29.2% to -14.5%) |
| 28 | Dominica           | Physical violence by firearm                    | 0 (0 to 0) | 0 (0 to 0) | 79.3% (60.9% to 104.5%)   |
| 29 | Dominica           | Physical violence by other means                | 0 (0 to 0) | 0 (0 to 0) | 26.5% (16% to 37.6%)      |
| 30 | Dominica           | Physical violence by sharp object               | 0 (0 to 0) | 0 (0 to 0) | 34.4% (22.7% to 48.8%)    |
| 31 | Dominica           | Poisoning by carbon monoxide                    | 0 (0 to 0) | 0 (0 to 0) | 4.2% (-9.6% to 19.4%)     |
| 32 | Dominica           | Poisoning by other means                        | 0 (0 to 0) | 0 (0 to 0) | -52.4% (-58.1% to -46.3%) |
| 33 | Dominica           | Pulmonary aspiration and foreign body in airway | 0 (0 to 0) | 0 (0 to 0) | -16.9% (-24.5% to -9.5%)  |
| 34 | Dominica           | Self-harm by firearm                            | 0 (0 to 0) | 0 (0 to 0) | 7.8% (-2.4% to 20.7%)     |
| 35 | Dominica           | Self-harm by other specified means              | 0 (0 to 0) | 0 (0 to 0) | -2.9% (-9.1% to 3.3%)     |
| 36 | Dominica           | Unintentional firearm injuries                  | 0 (0 to 0) | 0 (0 to 0) | 14.8% (6.1% to 23.8%)     |
| 37 | Dominica           | Venomous animal contact                         | 0 (0 to 0) | 0 (0 to 0) | -7.7% (-13% to -2.4%)     |
| 38 | Dominican Republic | Adverse effects of medical treatment            | 0 (0 to 0) | 0 (0 to 0) | 0% (0% to 0%)             |
| 39 | Dominican Republic | Conflict and terrorism                          | 0 (0 to 0) | 0 (0 to 0) | NA                        |
| 40 | Dominican Republic | Cyclist road injuries                           | 0 (0 to 1) | 0 (0 to 0) | -10.2% (-20.3% to -0.2%)  |
| 41 | Dominican Republic | Drowning                                        | 0 (0 to 0) | 0 (0 to 0) | 56.2% (38.7% to 76.7%)    |
| 42 | Dominican Republic | Environmental heat and cold exposure            | 0 (0 to 0) | 0 (0 to 1) | 8% (3.8% to 11.7%)        |
| 43 | Dominican Republic | Executions and police conflict                  | 0 (0 to 0) | 0 (0 to 0) | NA                        |
| 44 | Dominican Republic | Exposure to forces of nature                    | 0 (0 to 0) | 0 (0 to 0) | NA                        |
| 45 |                    |                                                 |            |            |                           |
| 46 |                    |                                                 |            |            |                           |



|    |                    |                                                 |            |            |                           |
|----|--------------------|-------------------------------------------------|------------|------------|---------------------------|
| 1  |                    |                                                 |            |            |                           |
| 2  | Dominican Republic | Falls                                           | 1 (1 to 1) | 1 (1 to 2) | 60.5% (55.5% to 66.6%)    |
| 3  | Dominican Republic | Fire, heat, and hot substances                  | 0 (0 to 0) | 0 (0 to 0) | 4.5% (-0.1% to 8.8%)      |
| 4  | Dominican Republic | Foreign body in eyes                            | 0 (0 to 0) | 0 (0 to 0) | 0% (0% to 0%)             |
| 5  | Dominican Republic | Foreign body in other body part                 | 0 (0 to 0) | 0 (0 to 0) | -4.2% (-8.1% to 0%)       |
| 6  | Dominican Republic | Motor vehicle road injuries                     | 1 (0 to 1) | 1 (1 to 2) | 35.2% (21.5% to 50.2%)    |
| 7  | Dominican Republic | Motorcyclist road injuries                      | 0 (0 to 0) | 0 (0 to 1) | 89.5% (65.5% to 121.1%)   |
| 8  | Dominican Republic | Non-venomous animal contact                     | 0 (0 to 0) | 0 (0 to 0) | -16.5% (-19.9% to -12.6%) |
| 9  | Dominican Republic | Other exposure to mechanical forces             | 0 (0 to 0) | 0 (0 to 1) | 29.8% (20.6% to 38.8%)    |
| 10 | Dominican Republic | Other road injuries                             | 0 (0 to 0) | 0 (0 to 0) | -7.6% (-18.2% to 4.5%)    |
| 11 | Dominican Republic | Other transport injuries                        | 0 (0 to 0) | 0 (0 to 0) | 2.2% (-2% to 7%)          |
| 12 | Dominican Republic | Other unintentional injuries                    | 0 (0 to 0) | 0 (0 to 0) | 3.7% (-2.5% to 10.8%)     |
| 13 | Dominican Republic | Pedestrian road injuries                        | 0 (0 to 0) | 0 (0 to 0) | -1.2% (-11.9% to 10.6%)   |
| 14 | Dominican Republic | Physical violence by firearm                    | 0 (0 to 0) | 0 (0 to 0) | 231.8% (174.6% to 313.4%) |
| 15 | Dominican Republic | Physical violence by other means                | 0 (0 to 0) | 0 (0 to 0) | 24.7% (8.8% to 39.6%)     |
| 16 | Dominican Republic | Physical violence by sharp object               | 0 (0 to 0) | 0 (0 to 0) | 38.8% (15.7% to 60%)      |
| 17 | Dominican Republic | Poisoning by carbon monoxide                    | 0 (0 to 0) | 0 (0 to 0) | 36.2% (20.9% to 53.4%)    |
| 18 | Dominican Republic | Poisoning by other means                        | 0 (0 to 0) | 0 (0 to 0) | 10.1% (1.8% to 17.7%)     |
| 19 | Dominican Republic | Pulmonary aspiration and foreign body in airway | 0 (0 to 0) | 0 (0 to 0) | -25% (-32.4% to -17.5%)   |
| 20 | Dominican Republic | Self-harm by firearm                            | 0 (0 to 0) | 0 (0 to 0) | 69.9% (50.9% to 96.4%)    |
| 21 | Dominican Republic | Self-harm by other specified means              | 0 (0 to 0) | 0 (0 to 0) | 40.5% (30.5% to 51.4%)    |
| 22 | Dominican Republic | Unintentional firearm injuries                  | 0 (0 to 0) | 0 (0 to 1) | 49.1% (38.1% to 64.9%)    |
| 23 | Dominican Republic | Venomous animal contact                         | 0 (0 to 0) | 0 (0 to 0) | -15.2% (-19.1% to -10.2%) |
| 24 | Ecuador            | Adverse effects of medical treatment            | 0 (0 to 0) | 0 (0 to 0) | 0% (0% to 0%)             |
| 25 | Ecuador            | Conflict and terrorism                          | 0 (0 to 0) | 0 (0 to 0) | NA                        |
| 26 | Ecuador            | Cyclist road injuries                           | 0 (0 to 0) | 0 (0 to 0) | 5% (-4.9% to 16.6%)       |
| 27 | Ecuador            | Drowning                                        | 0 (0 to 0) | 0 (0 to 0) | 30.5% (14.8% to 46.6%)    |
| 28 | Ecuador            | Environmental heat and cold exposure            | 0 (0 to 0) | 0 (0 to 0) | 6.5% (2.6% to 11.6%)      |
| 29 | Ecuador            | Executions and police conflict                  | 0 (0 to 0) | 0 (0 to 0) | NA                        |
| 30 | Ecuador            | Exposure to forces of nature                    | 0 (0 to 0) | 0 (0 to 0) | NA                        |
| 31 | Ecuador            | Falls                                           | 2 (1 to 2) | 2 (2 to 3) | 39.7% (34% to 45.4%)      |
| 32 | Ecuador            | Fire, heat, and hot substances                  | 0 (0 to 0) | 0 (0 to 0) | -5.4% (-11.1% to 0.4%)    |
| 33 | Ecuador            | Foreign body in eyes                            | 0 (0 to 0) | 0 (0 to 0) | 0% (0% to 0%)             |
| 34 | Ecuador            | Foreign body in other body part                 | 0 (0 to 0) | 0 (0 to 0) | -10.5% (-16.2% to -4.6%)  |
| 35 | Ecuador            | Motor vehicle road injuries                     | 0 (0 to 1) | 0 (0 to 1) | 22.5% (10.6% to 37.7%)    |
| 36 | Ecuador            | Motorcyclist road injuries                      | 0 (0 to 0) | 0 (0 to 0) | 110.9% (83.6% to 149.5%)  |
| 37 | Ecuador            | Non-venomous animal contact                     | 0 (0 to 0) | 0 (0 to 0) | -4.5% (-9.7% to 0.9%)     |
| 38 | Ecuador            | Other exposure to mechanical forces             | 0 (0 to 1) | 0 (0 to 1) | -0.4% (-8% to 7.5%)       |
| 39 | Ecuador            | Other road injuries                             | 0 (0 to 0) | 0 (0 to 0) | -2.9% (-13.8% to 9.7%)    |
| 40 | Ecuador            | Other transport injuries                        | 0 (0 to 0) | 0 (0 to 0) | 38.7% (27.4% to 51.7%)    |
| 41 | Ecuador            | Other unintentional injuries                    | 0 (0 to 0) | 0 (0 to 0) | -21.3% (-26.7% to -15.7%) |
| 42 | Ecuador            | Pedestrian road injuries                        | 0 (0 to 1) | 0 (0 to 0) | -35.7% (-42.8% to -28.3%) |
| 43 | Ecuador            | Physical violence by firearm                    | 0 (0 to 0) | 0 (0 to 0) | 29.7% (9.3% to 55.4%)     |
| 44 | Ecuador            | Physical violence by other means                | 0 (0 to 0) | 0 (0 to 0) | 7.1% (-5% to 19.2%)       |
| 45 |                    |                                                 |            |            |                           |
| 46 |                    |                                                 |            |            |                           |

|    |             |                                                 |              |            |                           |
|----|-------------|-------------------------------------------------|--------------|------------|---------------------------|
| 1  |             |                                                 |              |            |                           |
| 2  | Ecuador     | Physical violence by sharp object               | 0 (0 to 0)   | 0 (0 to 0) | -20.7% (-31.9% to -10.1%) |
| 3  | Ecuador     | Poisoning by carbon monoxide                    | 0 (0 to 0)   | 0 (0 to 0) | 51.5% (33% to 70.6%)      |
| 4  | Ecuador     | Poisoning by other means                        | 0 (0 to 0)   | 0 (0 to 0) | -4.3% (-11.2% to 3.2%)    |
| 5  | Ecuador     | Pulmonary aspiration and foreign body in airway | 0 (0 to 0)   | 0 (0 to 0) | -27.1% (-35.2% to -19.8%) |
| 6  | Ecuador     | Self-harm by firearm                            | 0 (0 to 0)   | 0 (0 to 0) | 44.4% (21% to 65.5%)      |
| 7  | Ecuador     | Self-harm by other specified means              | 0 (0 to 0)   | 0 (0 to 0) | 82.8% (67.3% to 104.7%)   |
| 8  | Ecuador     | Unintentional firearm injuries                  | 0 (0 to 0)   | 0 (0 to 0) | -10.7% (-19.5% to -1.8%)  |
| 9  | Egypt       | Venomous animal contact                         | 0 (0 to 0)   | 0 (0 to 0) | 1.9% (-3.8% to 8.6%)      |
| 10 | Egypt       | Adverse effects of medical treatment            | 0 (0 to 0)   | 0 (0 to 0) | 0% (0% to 0%)             |
| 11 | Egypt       | Conflict and terrorism                          | 0 (0 to 0)   | 0 (0 to 1) | NA                        |
| 12 | Egypt       | Cyclist road injuries                           | 0 (0 to 0)   | 0 (0 to 0) | 6.5% (-3.7% to 18.2%)     |
| 13 | Egypt       | Drowning                                        | 0 (0 to 0)   | 0 (0 to 0) | 55.7% (29% to 84.9%)      |
| 14 | Egypt       | Environmental heat and cold exposure            | 0 (0 to 0)   | 0 (0 to 0) | -3.1% (-8.7% to 2.6%)     |
| 15 | Egypt       | Executions and police conflict                  | 0 (0 to 0)   | 0 (0 to 0) | NA                        |
| 16 | Egypt       | Exposure to forces of nature                    | 0 (0 to 0)   | 0 (0 to 0) | NA                        |
| 17 | Egypt       | Falls                                           | 1 (1 to 1)   | 1 (1 to 2) | 42.7% (37.3% to 48%)      |
| 18 | Egypt       | Fire, heat, and hot substances                  | 0 (0 to 0)   | 0 (0 to 0) | -14.5% (-21.4% to -7.2%)  |
| 19 | Egypt       | Foreign body in eyes                            | 0 (0 to 0)   | 0 (0 to 0) | 0% (0% to 0%)             |
| 20 | Egypt       | Foreign body in other body part                 | 0 (0 to 0)   | 0 (0 to 0) | 0.6% (-3.4% to 4.4%)      |
| 21 | Egypt       | Motor vehicle road injuries                     | 1 (0 to 1)   | 1 (0 to 1) | -10.6% (-17.5% to -3.4%)  |
| 22 | Egypt       | Motorcyclist road injuries                      | 0 (0 to 0)   | 0 (0 to 0) | 10.7% (-0.8% to 23.5%)    |
| 23 | Egypt       | Non-venomous animal contact                     | 0 (0 to 0)   | 0 (0 to 0) | -7.9% (-12.4% to -3.3%)   |
| 24 | Egypt       | Other exposure to mechanical forces             | 0 (0 to 0)   | 0 (0 to 0) | 15.7% (9.6% to 23.4%)     |
| 25 | Egypt       | Other road injuries                             | 0 (0 to 0)   | 0 (0 to 0) | 7% (-4.1% to 19.7%)       |
| 26 | Egypt       | Other transport injuries                        | 0 (0 to 0)   | 0 (0 to 0) | -28.2% (-32.9% to -22.9%) |
| 27 | Egypt       | Other unintentional injuries                    | 0 (0 to 0)   | 0 (0 to 0) | -6% (-11.5% to 0.3%)      |
| 28 | Egypt       | Pedestrian road injuries                        | 0 (0 to 1)   | 0 (0 to 1) | -15.9% (-24.3% to -7%)    |
| 29 | Egypt       | Physical violence by firearm                    | 0 (0 to 0)   | 0 (0 to 0) | 92.3% (67.4% to 125%)     |
| 30 | Egypt       | Physical violence by other means                | 0 (0 to 0)   | 0 (0 to 0) | -4.8% (-12.8% to 2.2%)    |
| 31 | Egypt       | Physical violence by sharp object               | 0 (0 to 0)   | 0 (0 to 0) | -12.9% (-22.2% to -4.8%)  |
| 32 | Egypt       | Poisoning by carbon monoxide                    | 0 (0 to 0)   | 0 (0 to 0) | 56.1% (38.8% to 75.4%)    |
| 33 | Egypt       | Poisoning by other means                        | 0 (0 to 0)   | 0 (0 to 0) | -3.6% (-12.1% to 5.8%)    |
| 34 | Egypt       | Pulmonary aspiration and foreign body in airway | 0 (0 to 0)   | 0 (0 to 0) | -18.4% (-25.9% to -10%)   |
| 35 | Egypt       | Self-harm by firearm                            | 0 (0 to 0)   | 0 (0 to 0) | 40.5% (26.6% to 59.1%)    |
| 36 | Egypt       | Self-harm by other specified means              | 0 (0 to 0)   | 0 (0 to 0) | 4.2% (-3.2% to 11.6%)     |
| 37 | Egypt       | Unintentional firearm injuries                  | 0 (0 to 0)   | 0 (0 to 0) | -6% (-13.8% to 0.6%)      |
| 38 | Egypt       | Venomous animal contact                         | 0 (0 to 0)   | 0 (0 to 0) | -18.8% (-27.3% to -12.1%) |
| 39 | El Salvador | Adverse effects of medical treatment            | 0 (0 to 0)   | 0 (0 to 0) | 0% (0% to 0%)             |
| 40 | El Salvador | Conflict and terrorism                          | 11 (3 to 34) | 0 (0 to 0) | NA                        |
| 41 | El Salvador | Cyclist road injuries                           | 0 (0 to 0)   | 0 (0 to 0) | -23.7% (-32.4% to -14.7%) |
| 42 | El Salvador | Drowning                                        | 0 (0 to 0)   | 0 (0 to 0) | 61.1% (43.2% to 80%)      |
| 43 | El Salvador | Environmental heat and cold exposure            | 0 (0 to 0)   | 0 (0 to 0) | 2.8% (-1.7% to 6.9%)      |
| 44 | El Salvador | Executions and police conflict                  | 0 (0 to 0)   | 0 (0 to 0) | NA                        |
| 45 |             |                                                 |              |            |                           |
| 46 |             |                                                 |              |            |                           |

|    |                   |                                                 |            |            |                           |
|----|-------------------|-------------------------------------------------|------------|------------|---------------------------|
| 1  |                   |                                                 |            |            |                           |
| 2  | El Salvador       | Exposure to forces of nature                    | 0 (0 to 0) | 0 (0 to 0) | NA                        |
| 3  | El Salvador       | Falls                                           | 2 (1 to 3) | 2 (2 to 3) | 22.4% (17.9% to 26.9%)    |
| 4  | El Salvador       | Fire, heat, and hot substances                  | 0 (0 to 0) | 0 (0 to 0) | -13.3% (-21.3% to -6.7%)  |
| 5  | El Salvador       | Foreign body in eyes                            | 0 (0 to 0) | 0 (0 to 0) | 0% (0% to 0%)             |
| 6  | El Salvador       | Foreign body in other body part                 | 0 (0 to 0) | 0 (0 to 0) | -13.6% (-17.1% to -9.7%)  |
| 7  | El Salvador       | Motor vehicle road injuries                     | 1 (0 to 1) | 1 (0 to 1) | -15.1% (-22.1% to -7.2%)  |
| 8  | El Salvador       | Motorcyclist road injuries                      | 0 (0 to 0) | 0 (0 to 0) | 5.9% (-5.7% to 19.1%)     |
| 9  | El Salvador       | Non-venomous animal contact                     | 0 (0 to 0) | 0 (0 to 0) | -18.5% (-22.6% to -14.7%) |
| 10 | El Salvador       | Other exposure to mechanical forces             | 0 (0 to 0) | 0 (0 to 1) | 4.9% (-3.7% to 12.5%)     |
| 11 | El Salvador       | Other road injuries                             | 0 (0 to 0) | 0 (0 to 0) | -24.1% (-32% to -14.8%)   |
| 12 | El Salvador       | Other transport injuries                        | 0 (0 to 0) | 0 (0 to 0) | -33.5% (-36.6% to -30.2%) |
| 13 | El Salvador       | Other unintentional injuries                    | 0 (0 to 0) | 0 (0 to 0) | -35.9% (-42.5% to -28.7%) |
| 14 | El Salvador       | Pedestrian road injuries                        | 0 (0 to 1) | 0 (0 to 0) | -34.4% (-41.6% to -26.8%) |
| 15 | El Salvador       | Physical violence by firearm                    | 0 (0 to 1) | 1 (0 to 1) | 144.5% (105.6% to 203.1%) |
| 16 | El Salvador       | Physical violence by other means                | 0 (0 to 1) | 0 (0 to 1) | 23.3% (7.6% to 40%)       |
| 17 | El Salvador       | Physical violence by sharp object               | 0 (0 to 1) | 0 (0 to 1) | 8.1% (-8.8% to 26%)       |
| 18 | El Salvador       | Poisoning by carbon monoxide                    | 0 (0 to 0) | 0 (0 to 0) | 30.8% (16.7% to 48.3%)    |
| 19 | El Salvador       | Poisoning by other means                        | 0 (0 to 0) | 0 (0 to 0) | 2.9% (-5.6% to 12.9%)     |
| 20 | El Salvador       | Pulmonary aspiration and foreign body in airway | 0 (0 to 0) | 0 (0 to 0) | -59.3% (-66.6% to -51.4%) |
| 21 | El Salvador       | Self-harm by firearm                            | 0 (0 to 0) | 0 (0 to 0) | 27.6% (9.4% to 53.4%)     |
| 22 | El Salvador       | Self-harm by other specified means              | 0 (0 to 0) | 0 (0 to 0) | -24.1% (-32% to -15.8%)   |
| 23 | El Salvador       | Unintentional firearm injuries                  | 0 (0 to 0) | 0 (0 to 0) | 14.4% (5.3% to 25.7%)     |
| 24 | El Salvador       | Venomous animal contact                         | 0 (0 to 0) | 0 (0 to 0) | -12.3% (-16.9% to -7.3%)  |
| 25 | Equatorial Guinea | Adverse effects of medical treatment            | 0 (0 to 0) | 0 (0 to 0) | 0% (0% to 0%)             |
| 26 | Equatorial Guinea | Conflict and terrorism                          | 0 (0 to 0) | 0 (0 to 0) | NA                        |
| 27 | Equatorial Guinea | Cyclist road injuries                           | 0 (0 to 0) | 0 (0 to 0) | 33.7% (22.6% to 46.6%)    |
| 28 | Equatorial Guinea | Drowning                                        | 0 (0 to 0) | 0 (0 to 0) | -7.7% (-20.1% to 4.5%)    |
| 29 | Equatorial Guinea | Environmental heat and cold exposure            | 0 (0 to 0) | 0 (0 to 0) | -7.9% (-14.9% to 0.3%)    |
| 30 | Equatorial Guinea | Executions and police conflict                  | 0 (0 to 0) | 0 (0 to 0) | NA                        |
| 31 | Equatorial Guinea | Exposure to forces of nature                    | 0 (0 to 0) | 0 (0 to 0) | NA                        |
| 32 | Equatorial Guinea | Falls                                           | 1 (1 to 1) | 1 (1 to 2) | 40.9% (35.2% to 46.7%)    |
| 33 | Equatorial Guinea | Fire, heat, and hot substances                  | 0 (0 to 0) | 0 (0 to 0) | -18.2% (-24.9% to -11.6%) |
| 34 | Equatorial Guinea | Foreign body in eyes                            | 0 (0 to 0) | 0 (0 to 0) | 0% (0% to 0%)             |
| 35 | Equatorial Guinea | Foreign body in other body part                 | 1 (0 to 1) | 0 (0 to 1) | -14.7% (-19.9% to -10.5%) |
| 36 | Equatorial Guinea | Motor vehicle road injuries                     | 1 (0 to 1) | 1 (0 to 1) | 17.9% (8.7% to 28.5%)     |
| 37 | Equatorial Guinea | Motorcyclist road injuries                      | 0 (0 to 0) | 0 (0 to 0) | 10.6% (-4.1% to 26.4%)    |
| 38 | Equatorial Guinea | Non-venomous animal contact                     | 0 (0 to 0) | 0 (0 to 0) | -55.1% (-58.5% to -51.5%) |
| 39 | Equatorial Guinea | Other exposure to mechanical forces             | 0 (0 to 0) | 0 (0 to 0) | -11% (-20% to -1%)        |
| 40 | Equatorial Guinea | Other road injuries                             | 0 (0 to 0) | 0 (0 to 0) | 40.1% (24.7% to 58.5%)    |
| 41 | Equatorial Guinea | Other transport injuries                        | 0 (0 to 0) | 0 (0 to 0) | -20.3% (-26.5% to -14%)   |
| 42 | Equatorial Guinea | Other unintentional injuries                    | 0 (0 to 0) | 0 (0 to 0) | -24.4% (-31.7% to -16.1%) |
| 43 | Equatorial Guinea | Pedestrian road injuries                        | 0 (0 to 1) | 0 (0 to 1) | -16% (-23.5% to -8.1%)    |
| 44 | Equatorial Guinea | Physical violence by firearm                    | 0 (0 to 0) | 0 (0 to 0) | 40.8% (20.7% to 64.8%)    |
| 45 |                   |                                                 |            |            |                           |
| 46 |                   |                                                 |            |            |                           |

|    |                   |                                                 |                 |            |                           |
|----|-------------------|-------------------------------------------------|-----------------|------------|---------------------------|
| 1  |                   |                                                 |                 |            |                           |
| 2  | Equatorial Guinea | Physical violence by other means                | 0 (0 to 0)      | 0 (0 to 0) | -5% (-12.7% to 2.5%)      |
| 3  | Equatorial Guinea | Physical violence by sharp object               | 0 (0 to 0)      | 0 (0 to 0) | 0.7% (-7.3% to 10.9%)     |
| 4  | Equatorial Guinea | Poisoning by carbon monoxide                    | 0 (0 to 0)      | 0 (0 to 0) | 28% (9.2% to 50.6%)       |
| 5  | Equatorial Guinea | Poisoning by other means                        | 0 (0 to 0)      | 0 (0 to 0) | -28% (-38.2% to -15.8%)   |
| 6  | Equatorial Guinea | Pulmonary aspiration and foreign body in airway | 0 (0 to 0)      | 0 (0 to 0) | -52.2% (-59.6% to -43.8%) |
| 7  | Equatorial Guinea | Self-harm by firearm                            | 0 (0 to 0)      | 0 (0 to 0) | 55.5% (33.7% to 83.9%)    |
| 8  | Equatorial Guinea | Self-harm by other specified means              | 0 (0 to 0)      | 0 (0 to 0) | -9.6% (-17.9% to -2%)     |
| 9  | Equatorial Guinea | Unintentional firearm injuries                  | 0 (0 to 0)      | 0 (0 to 0) | -20.2% (-30.5% to -10.8%) |
| 10 | Eritrea           | Venomous animal contact                         | 0 (0 to 0)      | 0 (0 to 0) | -51% (-56.9% to -43.3%)   |
| 11 | Eritrea           | Adverse effects of medical treatment            | 0 (0 to 0)      | 0 (0 to 0) | 0% (0% to 0%)             |
| 12 | Eritrea           | Conflict and terrorism                          | 100 (19 to 319) | 0 (0 to 0) | NA                        |
| 13 | Eritrea           | Cyclist road injuries                           | 1 (1 to 3)      | 2 (1 to 3) | 5% (-2.7% to 12.7%)       |
| 14 | Eritrea           | Drowning                                        | 0 (0 to 0)      | 0 (0 to 0) | -14.5% (-19.9% to -8.7%)  |
| 15 | Eritrea           | Environmental heat and cold exposure            | 0 (0 to 0)      | 0 (0 to 0) | -10% (-15% to -4.5%)      |
| 16 | Eritrea           | Executions and police conflict                  | 0 (0 to 0)      | 0 (0 to 0) | NA                        |
| 17 | Eritrea           | Exposure to forces of nature                    | 0 (0 to 0)      | 0 (0 to 0) | NA                        |
| 18 | Eritrea           | Falls                                           | 3 (2 to 4)      | 4 (2 to 5) | 28.4% (24.3% to 32.6%)    |
| 19 | Eritrea           | Fire, heat, and hot substances                  | 0 (0 to 0)      | 0 (0 to 0) | -11.1% (-15.7% to -7.4%)  |
| 20 | Eritrea           | Foreign body in eyes                            | 0 (0 to 0)      | 0 (0 to 0) | 0% (0% to 0%)             |
| 21 | Eritrea           | Foreign body in other body part                 | 1 (0 to 1)      | 1 (0 to 1) | -1.5% (-4.9% to 2.7%)     |
| 22 | Eritrea           | Motor vehicle road injuries                     | 1 (1 to 2)      | 1 (1 to 2) | 8.4% (-0.5% to 18%)       |
| 23 | Eritrea           | Motorcyclist road injuries                      | 1 (0 to 1)      | 1 (0 to 1) | 2.4% (-5.6% to 10.6%)     |
| 24 | Eritrea           | Non-venomous animal contact                     | 1 (0 to 1)      | 1 (0 to 1) | -12.8% (-16.4% to -9.2%)  |
| 25 | Eritrea           | Other exposure to mechanical forces             | 0 (0 to 1)      | 0 (0 to 1) | -6.5% (-11.1% to -1.3%)   |
| 26 | Eritrea           | Other road injuries                             | 0 (0 to 0)      | 0 (0 to 0) | 13.7% (2.9% to 24.6%)     |
| 27 | Eritrea           | Other transport injuries                        | 0 (0 to 1)      | 0 (0 to 1) | -8.9% (-12.8% to -4.6%)   |
| 28 | Eritrea           | Other unintentional injuries                    | 0 (0 to 1)      | 0 (0 to 0) | -14.1% (-18.6% to -9.6%)  |
| 29 | Eritrea           | Pedestrian road injuries                        | 2 (1 to 4)      | 2 (1 to 4) | -0.1% (-6.9% to 6.2%)     |
| 30 | Eritrea           | Physical violence by firearm                    | 0 (0 to 0)      | 0 (0 to 0) | 45.5% (32.5% to 59.9%)    |
| 31 | Eritrea           | Physical violence by other means                | 0 (0 to 0)      | 0 (0 to 0) | 37.1% (28.3% to 45.8%)    |
| 32 | Eritrea           | Physical violence by sharp object               | 0 (0 to 0)      | 0 (0 to 0) | 40.4% (29.9% to 52.8%)    |
| 33 | Eritrea           | Poisoning by carbon monoxide                    | 0 (0 to 0)      | 0 (0 to 0) | 20% (8% to 33.3%)         |
| 34 | Eritrea           | Poisoning by other means                        | 0 (0 to 0)      | 0 (0 to 0) | -16.9% (-23.2% to -10.5%) |
| 35 | Eritrea           | Pulmonary aspiration and foreign body in airway | 0 (0 to 0)      | 0 (0 to 0) | -10.9% (-20.3% to -0.6%)  |
| 36 | Eritrea           | Self-harm by firearm                            | 0 (0 to 0)      | 0 (0 to 0) | 43% (26.3% to 64.4%)      |
| 37 | Eritrea           | Self-harm by other specified means              | 0 (0 to 0)      | 0 (0 to 0) | 19.4% (13.1% to 25.1%)    |
| 38 | Eritrea           | Unintentional firearm injuries                  | 0 (0 to 0)      | 0 (0 to 0) | -22.6% (-29.1% to -16.1%) |
| 39 | Eritrea           | Venomous animal contact                         | 0 (0 to 0)      | 0 (0 to 0) | -12.8% (-19.2% to -5.4%)  |
| 40 | Estonia           | Adverse effects of medical treatment            | 0 (0 to 0)      | 0 (0 to 0) | 0% (0% to 0%)             |
| 41 | Estonia           | Conflict and terrorism                          | 0 (0 to 0)      | 0 (0 to 0) | NA                        |
| 42 | Estonia           | Cyclist road injuries                           | 1 (0 to 1)      | 0 (0 to 1) | -38.7% (-47.3% to -29.3%) |
| 43 | Estonia           | Drowning                                        | 0 (0 to 0)      | 0 (0 to 0) | -7.7% (-18.8% to 4.4%)    |
| 44 | Estonia           | Environmental heat and cold exposure            | 0 (0 to 1)      | 0 (0 to 0) | -10.9% (-16.7% to -5.5%)  |
| 45 |                   |                                                 |                 |            |                           |
| 46 |                   |                                                 |                 |            |                           |

|    |          |                                                 |             |            |                           |
|----|----------|-------------------------------------------------|-------------|------------|---------------------------|
| 1  |          |                                                 |             |            |                           |
| 2  | Estonia  | Executions and police conflict                  | 0 (0 to 0)  | 0 (0 to 0) | NA                        |
| 3  | Estonia  | Exposure to forces of nature                    | 0 (0 to 0)  | 0 (0 to 0) | NA                        |
| 4  | Estonia  | Falls                                           | 7 (6 to 10) | 6 (4 to 7) | -23.8% (-28% to -19.1%)   |
| 5  | Estonia  | Fire, heat, and hot substances                  | 0 (0 to 0)  | 0 (0 to 0) | -47.4% (-52.4% to -42.1%) |
| 6  | Estonia  | Foreign body in eyes                            | 0 (0 to 0)  | 0 (0 to 0) | 0% (0% to 0%)             |
| 7  | Estonia  | Foreign body in other body part                 | 0 (0 to 0)  | 0 (0 to 0) | 2% (-2% to 7.2%)          |
| 8  | Estonia  | Motor vehicle road injuries                     | 3 (2 to 5)  | 1 (1 to 2) | -57.8% (-64.3% to -51.5%) |
| 9  | Estonia  | Motorcyclist road injuries                      | 0 (0 to 0)  | 0 (0 to 0) | -35.2% (-47.5% to -21.8%) |
| 10 | Estonia  | Non-venomous animal contact                     | 0 (0 to 0)  | 0 (0 to 0) | -7.2% (-11.1% to -3.1%)   |
| 11 | Estonia  | Other exposure to mechanical forces             | 1 (1 to 2)  | 1 (0 to 2) | -22.2% (-30% to -15.1%)   |
| 12 | Estonia  | Other road injuries                             | 0 (0 to 0)  | 0 (0 to 0) | -12.3% (-24.5% to 1.5%)   |
| 13 | Estonia  | Other transport injuries                        | 0 (0 to 0)  | 0 (0 to 0) | -35% (-41.5% to -28%)     |
| 14 | Estonia  | Other unintentional injuries                    | 0 (0 to 0)  | 0 (0 to 0) | -14.9% (-24.7% to -4.2%)  |
| 15 | Estonia  | Pedestrian road injuries                        | 1 (0 to 2)  | 0 (0 to 1) | -64.9% (-70.6% to -58.8%) |
| 16 | Estonia  | Physical violence by firearm                    | 0 (0 to 0)  | 0 (0 to 0) | -53.6% (-66.6% to -38.2%) |
| 17 | Estonia  | Physical violence by other means                | 1 (0 to 1)  | 0 (0 to 1) | -48.7% (-55.3% to -39.9%) |
| 18 | Estonia  | Physical violence by sharp object               | 0 (0 to 1)  | 0 (0 to 0) | -58.2% (-66% to -49.8%)   |
| 19 | Estonia  | Poisoning by carbon monoxide                    | 0 (0 to 0)  | 0 (0 to 0) | 22.9% (1.5% to 43.4%)     |
| 20 | Estonia  | Poisoning by other means                        | 0 (0 to 0)  | 0 (0 to 0) | 6.3% (-5.8% to 17.5%)     |
| 21 | Estonia  | Pulmonary aspiration and foreign body in airway | 0 (0 to 0)  | 0 (0 to 0) | -43.6% (-50.5% to -35.5%) |
| 22 | Estonia  | Self-harm by firearm                            | 0 (0 to 0)  | 0 (0 to 0) | -44.1% (-53.7% to -33.7%) |
| 23 | Estonia  | Self-harm by other specified means              | 1 (0 to 1)  | 0 (0 to 1) | -46.8% (-50.3% to -42.5%) |
| 24 | Estonia  | Unintentional firearm injuries                  | 0 (0 to 0)  | 0 (0 to 0) | -11.9% (-24.7% to 0.8%)   |
| 25 | Estonia  | Venomous animal contact                         | 0 (0 to 0)  | 0 (0 to 0) | -9% (-14.5% to -3.4%)     |
| 26 | Eswatini | Adverse effects of medical treatment            | 0 (0 to 0)  | 0 (0 to 0) | 0% (0% to 0%)             |
| 27 | Eswatini | Conflict and terrorism                          | 0 (0 to 0)  | 0 (0 to 0) | NA                        |
| 28 | Eswatini | Cyclist road injuries                           | 0 (0 to 1)  | 1 (0 to 1) | 26.9% (16.8% to 39.1%)    |
| 29 | Eswatini | Drowning                                        | 0 (0 to 0)  | 0 (0 to 0) | -2.2% (-8.6% to 3.8%)     |
| 30 | Eswatini | Environmental heat and cold exposure            | 0 (0 to 0)  | 0 (0 to 0) | -1% (-6% to 3.9%)         |
| 31 | Eswatini | Executions and police conflict                  | 0 (0 to 0)  | 0 (0 to 0) | NA                        |
| 32 | Eswatini | Exposure to forces of nature                    | 0 (0 to 0)  | 0 (0 to 0) | NA                        |
| 33 | Eswatini | Falls                                           | 2 (2 to 3)  | 3 (2 to 4) | 18.8% (14.7% to 23.3%)    |
| 34 | Eswatini | Fire, heat, and hot substances                  | 0 (0 to 0)  | 0 (0 to 0) | 0.5% (-6% to 6.2%)        |
| 35 | Eswatini | Foreign body in eyes                            | 0 (0 to 0)  | 0 (0 to 0) | 0% (0% to 0%)             |
| 36 | Eswatini | Foreign body in other body part                 | 1 (0 to 1)  | 1 (0 to 1) | -1% (-4.8% to 2.6%)       |
| 37 | Eswatini | Motor vehicle road injuries                     | 1 (0 to 2)  | 1 (1 to 2) | 25.4% (15.8% to 36.5%)    |
| 38 | Eswatini | Motorcyclist road injuries                      | 0 (0 to 1)  | 0 (0 to 1) | 54.9% (38.8% to 75.4%)    |
| 39 | Eswatini | Non-venomous animal contact                     | 0 (0 to 0)  | 0 (0 to 0) | -6% (-10.4% to -0.9%)     |
| 40 | Eswatini | Other exposure to mechanical forces             | 0 (0 to 1)  | 0 (0 to 0) | -4.4% (-9.6% to 1%)       |
| 41 | Eswatini | Other road injuries                             | 0 (0 to 0)  | 0 (0 to 0) | 12.4% (2.9% to 22.7%)     |
| 42 | Eswatini | Other transport injuries                        | 0 (0 to 1)  | 0 (0 to 1) | 6.4% (1.2% to 11.6%)      |
| 43 | Eswatini | Other unintentional injuries                    | 0 (0 to 0)  | 0 (0 to 0) | -9.8% (-14.3% to -5.1%)   |
| 44 | Eswatini | Pedestrian road injuries                        | 1 (1 to 2)  | 2 (1 to 3) | 15.6% (7.2% to 24%)       |
| 45 |          |                                                 |             |            |                           |
| 46 |          |                                                 |             |            |                           |

|    |          |                                                 |                |            |                           |
|----|----------|-------------------------------------------------|----------------|------------|---------------------------|
| 1  |          |                                                 |                |            |                           |
| 2  | Eswatini | Physical violence by firearm                    | 0 (0 to 0)     | 0 (0 to 0) | -16% (-25.7% to -5.1%)    |
| 3  | Eswatini | Physical violence by other means                | 0 (0 to 1)     | 0 (0 to 1) | -12.6% (-20.6% to -3.1%)  |
| 4  | Eswatini | Physical violence by sharp object               | 0 (0 to 0)     | 0 (0 to 0) | -5.3% (-16% to 7%)        |
| 5  | Eswatini | Poisoning by carbon monoxide                    | 0 (0 to 0)     | 0 (0 to 0) | 6.3% (-6.3% to 21%)       |
| 6  | Eswatini | Poisoning by other means                        | 0 (0 to 0)     | 0 (0 to 0) | -6.2% (-13.7% to 2.1%)    |
| 7  | Eswatini | Pulmonary aspiration and foreign body in airway | 0 (0 to 0)     | 0 (0 to 0) | 0.5% (-7% to 8.7%)        |
| 8  | Eswatini | Self-harm by firearm                            | 0 (0 to 0)     | 0 (0 to 0) | 49.1% (30% to 76%)        |
| 9  | Eswatini | Self-harm by other specified means              | 0 (0 to 0)     | 0 (0 to 0) | 41.7% (32.9% to 52.1%)    |
| 10 | Eswatini | Unintentional firearm injuries                  | 0 (0 to 0)     | 0 (0 to 0) | -10.9% (-18.2% to -2.5%)  |
| 11 | Ethiopia | Venomous animal contact                         | 0 (0 to 0)     | 0 (0 to 0) | -14% (-19.9% to -7.1%)    |
| 12 | Ethiopia | Adverse effects of medical treatment            | 0 (0 to 0)     | 0 (0 to 0) | 0% (0% to 0%)             |
| 13 | Ethiopia | Conflict and terrorism                          | 67 (16 to 185) | 0 (0 to 0) | NA                        |
| 14 | Ethiopia | Cyclist road injuries                           | 1 (0 to 1)     | 0 (0 to 1) | -22.9% (-26.3% to -19.6%) |
| 15 | Ethiopia | Drowning                                        | 0 (0 to 0)     | 0 (0 to 0) | -31% (-36.1% to -26.1%)   |
| 16 | Ethiopia | Environmental heat and cold exposure            | 0 (0 to 0)     | 0 (0 to 0) | -16.1% (-22% to -9.7%)    |
| 17 | Ethiopia | Executions and police conflict                  | 0 (0 to 0)     | 0 (0 to 0) | NA                        |
| 18 | Ethiopia | Exposure to forces of nature                    | 0 (0 to 0)     | 0 (0 to 0) | NA                        |
| 19 | Ethiopia | Falls                                           | 1 (1 to 2)     | 1 (1 to 2) | 7.4% (4.5% to 10.5%)      |
| 20 | Ethiopia | Fire, heat, and hot substances                  | 0 (0 to 0)     | 0 (0 to 0) | -23.7% (-27.4% to -20%)   |
| 21 | Ethiopia | Foreign body in eyes                            | 0 (0 to 0)     | 0 (0 to 0) | 0% (0% to 0%)             |
| 22 | Ethiopia | Foreign body in other body part                 | 0 (0 to 1)     | 0 (0 to 1) | -4.6% (-7.9% to -0.9%)    |
| 23 | Ethiopia | Motor vehicle road injuries                     | 1 (0 to 1)     | 1 (0 to 1) | -26.2% (-29.6% to -22.2%) |
| 24 | Ethiopia | Motorcyclist road injuries                      | 0 (0 to 0)     | 0 (0 to 0) | -29.8% (-33.5% to -25.8%) |
| 25 | Ethiopia | Non-venomous animal contact                     | 0 (0 to 1)     | 0 (0 to 1) | -34.5% (-36.7% to -32.2%) |
| 26 | Ethiopia | Other exposure to mechanical forces             | 0 (0 to 0)     | 0 (0 to 0) | -5.4% (-10.8% to 0.8%)    |
| 27 | Ethiopia | Other road injuries                             | 0 (0 to 0)     | 0 (0 to 0) | -2.3% (-8.5% to 4.2%)     |
| 28 | Ethiopia | Other transport injuries                        | 0 (0 to 0)     | 0 (0 to 0) | -23.6% (-27.4% to -20%)   |
| 29 | Ethiopia | Other unintentional injuries                    | 0 (0 to 0)     | 0 (0 to 0) | -29.6% (-32.6% to -26.7%) |
| 30 | Ethiopia | Pedestrian road injuries                        | 1 (0 to 1)     | 0 (0 to 1) | -39.8% (-43.1% to -36.4%) |
| 31 | Ethiopia | Physical violence by firearm                    | 0 (0 to 0)     | 0 (0 to 0) | -29.5% (-32.7% to -25.4%) |
| 32 | Ethiopia | Physical violence by other means                | 0 (0 to 0)     | 0 (0 to 0) | -28.2% (-31.4% to -24.9%) |
| 33 | Ethiopia | Physical violence by sharp object               | 0 (0 to 0)     | 0 (0 to 0) | -23.2% (-26.3% to -19.8%) |
| 34 | Ethiopia | Poisoning by carbon monoxide                    | 0 (0 to 0)     | 0 (0 to 0) | -3.9% (-12.5% to 6.2%)    |
| 35 | Ethiopia | Poisoning by other means                        | 0 (0 to 0)     | 0 (0 to 0) | -43.6% (-47.7% to -38.5%) |
| 36 | Ethiopia | Pulmonary aspiration and foreign body in airway | 0 (0 to 0)     | 0 (0 to 0) | -23.8% (-30.5% to -16.8%) |
| 37 | Ethiopia | Self-harm by firearm                            | 0 (0 to 0)     | 0 (0 to 0) | -19.2% (-26% to -10.8%)   |
| 38 | Ethiopia | Self-harm by other specified means              | 0 (0 to 0)     | 0 (0 to 0) | -43% (-45.7% to -40.1%)   |
| 39 | Ethiopia | Unintentional firearm injuries                  | 0 (0 to 0)     | 0 (0 to 0) | -28.6% (-34.7% to -23.2%) |
| 40 | Ethiopia | Venomous animal contact                         | 0 (0 to 0)     | 0 (0 to 0) | -38.4% (-43.5% to -33.3%) |
| 41 | Fiji     | Adverse effects of medical treatment            | 0 (0 to 0)     | 0 (0 to 0) | 0% (0% to 0%)             |
| 42 | Fiji     | Conflict and terrorism                          | 0 (0 to 0)     | 0 (0 to 0) | NA                        |
| 43 | Fiji     | Cyclist road injuries                           | 0 (0 to 0)     | 0 (0 to 0) | 0.3% (-6.7% to 9%)        |
| 44 | Fiji     | Drowning                                        | 0 (0 to 0)     | 0 (0 to 0) | 6.9% (-1.1% to 15.1%)     |
| 45 |          |                                                 |                |            |                           |
| 46 |          |                                                 |                |            |                           |

|    |         |                                                 |              |              |                           |
|----|---------|-------------------------------------------------|--------------|--------------|---------------------------|
| 1  |         |                                                 |              |              |                           |
| 2  | Fiji    | Environmental heat and cold exposure            | 0 (0 to 0)   | 0 (0 to 0)   | -0.7% (-5.4% to 5%)       |
| 3  | Fiji    | Executions and police conflict                  | 0 (0 to 0)   | 0 (0 to 0)   | NA                        |
| 4  | Fiji    | Exposure to forces of nature                    | 0 (0 to 0)   | 0 (0 to 0)   | NA                        |
| 5  | Fiji    | Falls                                           | 1 (1 to 1)   | 1 (1 to 2)   | 35.6% (31.2% to 40.8%)    |
| 6  | Fiji    | Fire, heat, and hot substances                  | 0 (0 to 0)   | 0 (0 to 0)   | -4.6% (-9.7% to 0.1%)     |
| 7  | Fiji    | Foreign body in eyes                            | 0 (0 to 0)   | 0 (0 to 0)   | 0% (0% to 0%)             |
| 8  | Fiji    | Foreign body in other body part                 | 0 (0 to 0)   | 0 (0 to 0)   | -4.2% (-7.4% to -0.3%)    |
| 9  | Fiji    | Motor vehicle road injuries                     | 0 (0 to 1)   | 0 (0 to 1)   | -19.3% (-25.3% to -13.4%) |
| 10 | Fiji    | Motorcyclist road injuries                      | 0 (0 to 0)   | 0 (0 to 0)   | 13.9% (4.2% to 25.8%)     |
| 11 | Fiji    | Non-venomous animal contact                     | 0 (0 to 0)   | 0 (0 to 0)   | -17.4% (-22.1% to -13.2%) |
| 12 | Fiji    | Other exposure to mechanical forces             | 0 (0 to 0)   | 0 (0 to 0)   | -18.8% (-24.8% to -13.6%) |
| 13 | Fiji    | Other road injuries                             | 0 (0 to 0)   | 0 (0 to 0)   | -2.3% (-11.7% to 8.5%)    |
| 14 | Fiji    | Other transport injuries                        | 0 (0 to 0)   | 0 (0 to 0)   | -3.7% (-8% to 0.7%)       |
| 15 | Fiji    | Other unintentional injuries                    | 0 (0 to 0)   | 0 (0 to 0)   | -20.3% (-24% to -16.1%)   |
| 16 | Fiji    | Pedestrian road injuries                        | 0 (0 to 0)   | 0 (0 to 0)   | -10.8% (-18.9% to -1.8%)  |
| 17 | Fiji    | Physical violence by firearm                    | 0 (0 to 0)   | 0 (0 to 0)   | 22.7% (11.1% to 36.6%)    |
| 18 | Fiji    | Physical violence by other means                | 0 (0 to 1)   | 0 (0 to 1)   | 8.4% (0.6% to 16.5%)      |
| 19 | Fiji    | Physical violence by sharp object               | 0 (0 to 0)   | 0 (0 to 0)   | 4.6% (-5.4% to 16.3%)     |
| 20 | Fiji    | Poisoning by carbon monoxide                    | 0 (0 to 0)   | 0 (0 to 0)   | 14.9% (4.3% to 25.8%)     |
| 21 | Fiji    | Poisoning by other means                        | 0 (0 to 0)   | 0 (0 to 0)   | -8.8% (-15.7% to -2.4%)   |
| 22 | Fiji    | Pulmonary aspiration and foreign body in airway | 0 (0 to 0)   | 0 (0 to 0)   | -5.5% (-14.4% to 4.5%)    |
| 23 | Fiji    | Self-harm by firearm                            | 0 (0 to 0)   | 0 (0 to 0)   | 12.5% (-2.1% to 31.4%)    |
| 24 | Fiji    | Self-harm by other specified means              | 0 (0 to 0)   | 0 (0 to 0)   | -12.2% (-18.2% to -6.1%)  |
| 25 | Fiji    | Unintentional firearm injuries                  | 0 (0 to 0)   | 0 (0 to 0)   | -8.3% (-13.7% to -2.4%)   |
| 26 | Fiji    | Venomous animal contact                         | 0 (0 to 0)   | 0 (0 to 0)   | -7.8% (-14.7% to -0.8%)   |
| 27 | Finland | Adverse effects of medical treatment            | 0 (0 to 0)   | 0 (0 to 0)   | 0% (0% to 0%)             |
| 28 | Finland | Conflict and terrorism                          | 0 (0 to 0)   | 0 (0 to 0)   | NA                        |
| 29 | Finland | Cyclist road injuries                           | 0 (0 to 1)   | 0 (0 to 0)   | -44.5% (-52.1% to -36.9%) |
| 30 | Finland | Drowning                                        | 0 (0 to 0)   | 0 (0 to 0)   | 80.4% (63.2% to 99.6%)    |
| 31 | Finland | Environmental heat and cold exposure            | 0 (0 to 0)   | 0 (0 to 0)   | 7.3% (1.5% to 13.9%)      |
| 32 | Finland | Executions and police conflict                  | 0 (0 to 0)   | 0 (0 to 0)   | NA                        |
| 33 | Finland | Exposure to forces of nature                    | 0 (0 to 0)   | 0 (0 to 0)   | NA                        |
| 34 | Finland | Falls                                           | 10 (7 to 13) | 10 (7 to 13) | 0.7% (-3.5% to 5.3%)      |
| 35 | Finland | Fire, heat, and hot substances                  | 0 (0 to 0)   | 0 (0 to 0)   | -26.5% (-31.6% to -21.3%) |
| 36 | Finland | Foreign body in eyes                            | 0 (0 to 0)   | 0 (0 to 0)   | 0% (0% to 0%)             |
| 37 | Finland | Foreign body in other body part                 | 0 (0 to 0)   | 0 (0 to 0)   | -0.8% (-4.6% to 3.2%)     |
| 38 | Finland | Motor vehicle road injuries                     | 1 (0 to 1)   | 0 (0 to 1)   | -47.4% (-54.1% to -40.8%) |
| 39 | Finland | Motorcyclist road injuries                      | 0 (0 to 0)   | 0 (0 to 0)   | -15.7% (-29.2% to -1.2%)  |
| 40 | Finland | Non-venomous animal contact                     | 0 (0 to 0)   | 0 (0 to 0)   | -19.7% (-23.1% to -16.3%) |
| 41 | Finland | Other exposure to mechanical forces             | 1 (0 to 1)   | 1 (0 to 1)   | -6.8% (-13% to -0.8%)     |
| 42 | Finland | Other road injuries                             | 0 (0 to 0)   | 0 (0 to 0)   | -17.2% (-27.2% to -5.3%)  |
| 43 | Finland | Other transport injuries                        | 0 (0 to 0)   | 0 (0 to 0)   | -34.7% (-40.1% to -28.4%) |
| 44 | Finland | Other unintentional injuries                    | 0 (0 to 1)   | 0 (0 to 0)   | -24.3% (-29.7% to -18.5%) |
| 45 |         |                                                 |              |              |                           |
| 46 |         |                                                 |              |              |                           |

|    |         |                                                 |             |             |                           |
|----|---------|-------------------------------------------------|-------------|-------------|---------------------------|
| 1  |         |                                                 |             |             |                           |
| 2  | Finland | Pedestrian road injuries                        | 0 (0 to 0)  | 0 (0 to 0)  | -32.3% (-42.9% to -20.7%) |
| 3  | Finland | Physical violence by firearm                    | 0 (0 to 0)  | 0 (0 to 0)  | 14% (-0.1% to 31.5%)      |
| 4  | Finland | Physical violence by other means                | 0 (0 to 1)  | 0 (0 to 0)  | -33.4% (-41% to -25.9%)   |
| 5  | Finland | Physical violence by sharp object               | 0 (0 to 0)  | 0 (0 to 0)  | -43.8% (-52.6% to -34.3%) |
| 6  | Finland | Poisoning by carbon monoxide                    | 0 (0 to 0)  | 0 (0 to 0)  | -75.9% (-82.6% to -67.3%) |
| 7  | Finland | Poisoning by other means                        | 0 (0 to 0)  | 0 (0 to 0)  | -43.2% (-52.2% to -34.1%) |
| 8  | Finland | Pulmonary aspiration and foreign body in airway | 0 (0 to 0)  | 0 (0 to 0)  | -20.8% (-27.5% to -14%)   |
| 9  | Finland | Self-harm by firearm                            | 0 (0 to 0)  | 0 (0 to 0)  | -61.3% (-68.9% to -53.7%) |
| 10 | Finland | Self-harm by other specified means              | 1 (0 to 1)  | 0 (0 to 1)  | -37% (-41% to -31.9%)     |
| 11 | Finland | Unintentional firearm injuries                  | 0 (0 to 0)  | 0 (0 to 0)  | 1.8% (-7.8% to 12.9%)     |
| 12 | Finland | Venomous animal contact                         | 0 (0 to 0)  | 0 (0 to 0)  | -14.3% (-19.9% to -8.1%)  |
| 13 | France  | Adverse effects of medical treatment            | 0 (0 to 0)  | 0 (0 to 0)  | 0% (0% to 0%)             |
| 14 | France  | Conflict and terrorism                          | 0 (0 to 0)  | 0 (0 to 0)  | NA                        |
| 15 | France  | Cyclist road injuries                           | 0 (0 to 0)  | 0 (0 to 0)  | -17.3% (-28.6% to -4.1%)  |
| 16 | France  | Drowning                                        | 0 (0 to 0)  | 0 (0 to 0)  | 103.6% (86.4% to 119.2%)  |
| 17 | France  | Environmental heat and cold exposure            | 0 (0 to 0)  | 0 (0 to 0)  | -15.7% (-20.9% to -9.9%)  |
| 18 | France  | Executions and police conflict                  | 0 (0 to 0)  | 0 (0 to 0)  | NA                        |
| 19 | France  | Exposure to forces of nature                    | 0 (0 to 0)  | 0 (0 to 0)  | NA                        |
| 20 | France  | Falls                                           | 8 (6 to 10) | 8 (6 to 11) | 2.5% (-1.8% to 7.3%)      |
| 21 | France  | Fire, heat, and hot substances                  | 0 (0 to 0)  | 0 (0 to 0)  | -12.9% (-17.7% to -7.7%)  |
| 22 | France  | Foreign body in eyes                            | 0 (0 to 0)  | 0 (0 to 0)  | 0% (0% to 0%)             |
| 23 | France  | Foreign body in other body part                 | 0 (0 to 0)  | 0 (0 to 0)  | 6% (2.3% to 10.3%)        |
| 24 | France  | Motor vehicle road injuries                     | 1 (0 to 1)  | 0 (0 to 1)  | -54.9% (-62.3% to -47.2%) |
| 25 | France  | Motorcyclist road injuries                      | 0 (0 to 0)  | 0 (0 to 0)  | -7% (-23.4% to 12.9%)     |
| 26 | France  | Non-venomous animal contact                     | 0 (0 to 0)  | 0 (0 to 0)  | -7.8% (-11% to -3.8%)     |
| 27 | France  | Other exposure to mechanical forces             | 1 (0 to 1)  | 1 (0 to 1)  | -7.4% (-13.6% to -1%)     |
| 28 | France  | Other road injuries                             | 0 (0 to 0)  | 0 (0 to 0)  | -7.8% (-22.5% to 7.9%)    |
| 29 | France  | Other transport injuries                        | 0 (0 to 0)  | 0 (0 to 0)  | 10.7% (6.4% to 15.2%)     |
| 30 | France  | Other unintentional injuries                    | 0 (0 to 1)  | 0 (0 to 0)  | -23.8% (-28.4% to -19.2%) |
| 31 | France  | Pedestrian road injuries                        | 0 (0 to 0)  | 0 (0 to 0)  | -60.9% (-67.9% to -52.8%) |
| 32 | France  | Physical violence by firearm                    | 0 (0 to 0)  | 0 (0 to 0)  | 17.6% (6.1% to 32.7%)     |
| 33 | France  | Physical violence by other means                | 0 (0 to 0)  | 0 (0 to 0)  | -27.6% (-35.8% to -20.9%) |
| 34 | France  | Physical violence by sharp object               | 0 (0 to 0)  | 0 (0 to 0)  | -21.4% (-31.7% to -11.8%) |
| 35 | France  | Poisoning by carbon monoxide                    | 0 (0 to 0)  | 0 (0 to 0)  | 12.9% (4.7% to 22%)       |
| 36 | France  | Poisoning by other means                        | 0 (0 to 0)  | 0 (0 to 0)  | 0.2% (-5.7% to 5.3%)      |
| 37 | France  | Pulmonary aspiration and foreign body in airway | 0 (0 to 0)  | 0 (0 to 0)  | -16.2% (-23.4% to -7.3%)  |
| 38 | France  | Self-harm by firearm                            | 0 (0 to 0)  | 0 (0 to 0)  | -44.1% (-52.7% to -34.9%) |
| 39 | France  | Self-harm by other specified means              | 0 (0 to 1)  | 0 (0 to 1)  | -29.1% (-33.1% to -24%)   |
| 40 | France  | Unintentional firearm injuries                  | 0 (0 to 0)  | 0 (0 to 0)  | -9.1% (-17.8% to -0.4%)   |
| 41 | France  | Venomous animal contact                         | 0 (0 to 0)  | 0 (0 to 0)  | -11.8% (-17.3% to -6.4%)  |
| 42 | Gabon   | Adverse effects of medical treatment            | 0 (0 to 0)  | 0 (0 to 0)  | 0% (0% to 0%)             |
| 43 | Gabon   | Conflict and terrorism                          | 0 (0 to 0)  | 0 (0 to 0)  | NA                        |
| 44 | Gabon   | Cyclist road injuries                           | 0 (0 to 0)  | 0 (0 to 0)  | 0.6% (-6.2% to 8.3%)      |
| 45 |         |                                                 |             |             |                           |
| 46 |         |                                                 |             |             |                           |



|    |        |                                                 |            |            |                           |
|----|--------|-------------------------------------------------|------------|------------|---------------------------|
| 1  |        |                                                 |            |            |                           |
| 2  | Gabon  | Drowning                                        | 0 (0 to 0) | 0 (0 to 0) | -14% (-21.3% to -6.3%)    |
| 3  | Gabon  | Environmental heat and cold exposure            | 0 (0 to 0) | 0 (0 to 0) | -7.5% (-12.2% to -1.5%)   |
| 4  | Gabon  | Executions and police conflict                  | 0 (0 to 0) | 0 (0 to 0) | NA                        |
| 5  | Gabon  | Exposure to forces of nature                    | 0 (0 to 0) | 0 (0 to 0) | NA                        |
| 6  | Gabon  | Falls                                           | 1 (1 to 2) | 1 (1 to 2) | 13.3% (9% to 17.1%)       |
| 7  | Gabon  | Fire, heat, and hot substances                  | 0 (0 to 0) | 0 (0 to 0) | -11% (-14.9% to -6.5%)    |
| 8  | Gabon  | Foreign body in eyes                            | 0 (0 to 0) | 0 (0 to 0) | 0% (0% to 0%)             |
| 9  | Gabon  | Foreign body in other body part                 | 0 (0 to 1) | 0 (0 to 1) | -2.2% (-5.9% to 1.1%)     |
| 10 | Gabon  | Motor vehicle road injuries                     | 1 (0 to 1) | 1 (0 to 1) | -3.1% (-8.4% to 3.8%)     |
| 11 | Gabon  | Motorcyclist road injuries                      | 0 (0 to 0) | 0 (0 to 0) | -6% (-14% to 3.4%)        |
| 12 | Gabon  | Non-venomous animal contact                     | 0 (0 to 0) | 0 (0 to 0) | -5.2% (-9.9% to -0.5%)    |
| 13 | Gabon  | Other exposure to mechanical forces             | 0 (0 to 0) | 0 (0 to 0) | -14.4% (-20% to -9%)      |
| 14 | Gabon  | Other road injuries                             | 0 (0 to 0) | 0 (0 to 0) | 3.2% (-4.8% to 12.5%)     |
| 15 | Gabon  | Other transport injuries                        | 0 (0 to 0) | 0 (0 to 0) | -11.6% (-15.7% to -7.5%)  |
| 16 | Gabon  | Other unintentional injuries                    | 0 (0 to 0) | 0 (0 to 0) | -13.5% (-19% to -7.8%)    |
| 17 | Gabon  | Pedestrian road injuries                        | 1 (0 to 1) | 0 (0 to 1) | -18.2% (-23.7% to -12.3%) |
| 18 | Gabon  | Physical violence by firearm                    | 0 (0 to 0) | 0 (0 to 0) | 13.8% (2.3% to 27%)       |
| 19 | Gabon  | Physical violence by other means                | 0 (0 to 0) | 0 (0 to 0) | -15.2% (-21% to -9.4%)    |
| 20 | Gabon  | Physical violence by sharp object               | 0 (0 to 0) | 0 (0 to 0) | -14.1% (-19.4% to -9%)    |
| 21 | Gabon  | Poisoning by carbon monoxide                    | 0 (0 to 0) | 0 (0 to 0) | 15.8% (4.6% to 29.3%)     |
| 22 | Gabon  | Poisoning by other means                        | 0 (0 to 0) | 0 (0 to 0) | -16.6% (-22.4% to -9.2%)  |
| 23 | Gabon  | Pulmonary aspiration and foreign body in airway | 0 (0 to 0) | 0 (0 to 0) | -11.9% (-20.1% to -2.2%)  |
| 24 | Gabon  | Self-harm by firearm                            | 0 (0 to 0) | 0 (0 to 0) | 0.3% (-10.1% to 12.3%)    |
| 25 | Gabon  | Self-harm by other specified means              | 0 (0 to 0) | 0 (0 to 0) | -13.2% (-17.9% to -7.8%)  |
| 26 | Gabon  | Unintentional firearm injuries                  | 0 (0 to 0) | 0 (0 to 0) | -12.5% (-18.1% to -6.7%)  |
| 27 | Gabon  | Venomous animal contact                         | 0 (0 to 0) | 0 (0 to 0) | -1.9% (-8.4% to 5.1%)     |
| 28 | Gambia | Adverse effects of medical treatment            | 0 (0 to 0) | 0 (0 to 0) | 0% (0% to 0%)             |
| 29 | Gambia | Conflict and terrorism                          | 0 (0 to 0) | 0 (0 to 0) | NA                        |
| 30 | Gambia | Cyclist road injuries                           | 1 (0 to 2) | 1 (0 to 2) | 14.4% (7.4% to 22.1%)     |
| 31 | Gambia | Drowning                                        | 0 (0 to 0) | 0 (0 to 0) | -1.3% (-8.6% to 6.3%)     |
| 32 | Gambia | Environmental heat and cold exposure            | 0 (0 to 0) | 0 (0 to 0) | -2.6% (-7.3% to 2.5%)     |
| 33 | Gambia | Executions and police conflict                  | 0 (0 to 0) | 0 (0 to 0) | NA                        |
| 34 | Gambia | Exposure to forces of nature                    | 0 (0 to 0) | 0 (0 to 0) | NA                        |
| 35 | Gambia | Falls                                           | 3 (2 to 4) | 3 (2 to 5) | 21.9% (17.4% to 26.7%)    |
| 36 | Gambia | Fire, heat, and hot substances                  | 0 (0 to 0) | 0 (0 to 0) | -1.3% (-6.3% to 3.5%)     |
| 37 | Gambia | Foreign body in eyes                            | 0 (0 to 0) | 0 (0 to 0) | 0% (0% to 0%)             |
| 38 | Gambia | Foreign body in other body part                 | 1 (0 to 1) | 1 (0 to 1) | 3.3% (-0.3% to 7.4%)      |
| 39 | Gambia | Motor vehicle road injuries                     | 1 (1 to 2) | 1 (1 to 3) | 10.2% (2% to 18.3%)       |
| 40 | Gambia | Motorcyclist road injuries                      | 1 (0 to 1) | 1 (0 to 1) | 14.4% (6.3% to 23.2%)     |
| 41 | Gambia | Non-venomous animal contact                     | 0 (0 to 0) | 0 (0 to 0) | -3.8% (-7.9% to 0.5%)     |
| 42 | Gambia | Other exposure to mechanical forces             | 0 (0 to 0) | 0 (0 to 0) | -11.1% (-15.5% to -6.6%)  |
| 43 | Gambia | Other road injuries                             | 0 (0 to 0) | 0 (0 to 0) | 3% (-4.8% to 11.3%)       |
| 44 | Gambia | Other transport injuries                        | 0 (0 to 0) | 0 (0 to 0) | -1.7% (-5.9% to 2.9%)     |
| 45 |        |                                                 |            |            |                           |
| 46 |        |                                                 |            |            |                           |

|    |         |                                                 |            |            |                           |
|----|---------|-------------------------------------------------|------------|------------|---------------------------|
| 1  |         |                                                 |            |            |                           |
| 2  | Gambia  | Other unintentional injuries                    | 0 (0 to 0) | 0 (0 to 0) | -5.3% (-9.9% to -0.3%)    |
| 3  | Gambia  | Pedestrian road injuries                        | 2 (1 to 3) | 2 (1 to 3) | 4.6% (-2.1% to 11%)       |
| 4  | Gambia  | Physical violence by firearm                    | 0 (0 to 0) | 0 (0 to 0) | 42.8% (22.4% to 66%)      |
| 5  | Gambia  | Physical violence by other means                | 0 (0 to 0) | 0 (0 to 0) | 2.1% (-2.4% to 6.6%)      |
| 6  | Gambia  | Physical violence by sharp object               | 0 (0 to 0) | 0 (0 to 0) | -0.5% (-5.9% to 4.7%)     |
| 7  | Gambia  | Poisoning by carbon monoxide                    | 0 (0 to 0) | 0 (0 to 0) | 10.6% (-1.5% to 23.6%)    |
| 8  | Gambia  | Poisoning by other means                        | 0 (0 to 0) | 0 (0 to 0) | -12.1% (-18.5% to -5.2%)  |
| 9  | Gambia  | Pulmonary aspiration and foreign body in airway | 0 (0 to 0) | 0 (0 to 0) | 9.7% (1.9% to 18.7%)      |
| 10 | Gambia  | Self-harm by firearm                            | 0 (0 to 0) | 0 (0 to 0) | 19.4% (7.5% to 32.2%)     |
| 11 | Gambia  | Self-harm by other specified means              | 0 (0 to 0) | 0 (0 to 0) | 17.2% (11.9% to 22.3%)    |
| 12 | Gambia  | Unintentional firearm injuries                  | 0 (0 to 0) | 0 (0 to 0) | -11.3% (-17.9% to -4.1%)  |
| 13 | Gambia  | Venomous animal contact                         | 0 (0 to 0) | 0 (0 to 0) | -3.3% (-9.9% to 3.9%)     |
| 14 | Georgia | Adverse effects of medical treatment            | 0 (0 to 0) | 0 (0 to 0) | 0% (0% to 0%)             |
| 15 | Georgia | Conflict and terrorism                          | 0 (0 to 0) | 0 (0 to 0) | NA                        |
| 16 | Georgia | Cyclist road injuries                           | 0 (0 to 0) | 0 (0 to 0) | -17.6% (-26.4% to -7.2%)  |
| 17 | Georgia | Drowning                                        | 0 (0 to 0) | 0 (0 to 0) | -18.3% (-28% to -8.1%)    |
| 18 | Georgia | Environmental heat and cold exposure            | 0 (0 to 0) | 0 (0 to 0) | -9.9% (-17.9% to -0.1%)   |
| 19 | Georgia | Executions and police conflict                  | 0 (0 to 0) | 0 (0 to 0) | NA                        |
| 20 | Georgia | Exposure to forces of nature                    | 0 (0 to 0) | 0 (0 to 0) | NA                        |
| 21 | Georgia | Falls                                           | 4 (3 to 5) | 5 (4 to 6) | 24.8% (18.5% to 31.8%)    |
| 22 | Georgia | Fire, heat, and hot substances                  | 0 (0 to 0) | 0 (0 to 0) | -25.3% (-31.4% to -18.9%) |
| 23 | Georgia | Foreign body in eyes                            | 0 (0 to 0) | 0 (0 to 0) | 0% (0% to 0%)             |
| 24 | Georgia | Foreign body in other body part                 | 0 (0 to 0) | 0 (0 to 0) | -32.6% (-38% to -28%)     |
| 25 | Georgia | Motor vehicle road injuries                     | 1 (1 to 2) | 1 (1 to 2) | -11.4% (-19.3% to -1.4%)  |
| 26 | Georgia | Motorcyclist road injuries                      | 0 (0 to 0) | 0 (0 to 0) | -25.2% (-36% to -12.3%)   |
| 27 | Georgia | Non-venomous animal contact                     | 0 (0 to 0) | 0 (0 to 0) | -13.5% (-23.7% to -0.6%)  |
| 28 | Georgia | Other exposure to mechanical forces             | 1 (0 to 1) | 1 (0 to 2) | 15.1% (6.7% to 25%)       |
| 29 | Georgia | Other road injuries                             | 0 (0 to 0) | 0 (0 to 0) | 6.4% (-5.3% to 20.4%)     |
| 30 | Georgia | Other transport injuries                        | 0 (0 to 0) | 0 (0 to 0) | 13.8% (2.3% to 27.1%)     |
| 31 | Georgia | Other unintentional injuries                    | 0 (0 to 0) | 0 (0 to 0) | 16.2% (8.2% to 24.8%)     |
| 32 | Georgia | Pedestrian road injuries                        | 0 (0 to 0) | 0 (0 to 1) | 10% (-2.1% to 25.1%)      |
| 33 | Georgia | Physical violence by firearm                    | 0 (0 to 0) | 0 (0 to 0) | -45% (-55.3% to -34.7%)   |
| 34 | Georgia | Physical violence by other means                | 0 (0 to 0) | 0 (0 to 0) | -20.9% (-30.6% to -11%)   |
| 35 | Georgia | Physical violence by sharp object               | 0 (0 to 0) | 0 (0 to 0) | -2.2% (-14.8% to 14%)     |
| 36 | Georgia | Poisoning by carbon monoxide                    | 0 (0 to 0) | 0 (0 to 0) | 9.2% (-6.5% to 29.8%)     |
| 37 | Georgia | Poisoning by other means                        | 0 (0 to 0) | 0 (0 to 0) | 24.4% (10.4% to 41.8%)    |
| 38 | Georgia | Pulmonary aspiration and foreign body in airway | 0 (0 to 0) | 0 (0 to 0) | 19.6% (6% to 33.6%)       |
| 39 | Georgia | Self-harm by firearm                            | 0 (0 to 0) | 0 (0 to 0) | 53.6% (31.7% to 91.7%)    |
| 40 | Georgia | Self-harm by other specified means              | 0 (0 to 0) | 0 (0 to 0) | 19.5% (12.8% to 27.6%)    |
| 41 | Georgia | Unintentional firearm injuries                  | 0 (0 to 0) | 0 (0 to 0) | -1.8% (-13.9% to 11.7%)   |
| 42 | Georgia | Venomous animal contact                         | 0 (0 to 0) | 0 (0 to 0) | -17.5% (-29.6% to -1.5%)  |
| 43 | Germany | Adverse effects of medical treatment            | 0 (0 to 0) | 0 (0 to 0) | 0% (0% to 0%)             |
| 44 | Germany | Conflict and terrorism                          | 0 (0 to 0) | 0 (0 to 0) | NA                        |
| 45 |         |                                                 |            |            |                           |
| 46 |         |                                                 |            |            |                           |

|    |         |                                                 |            |            |                           |
|----|---------|-------------------------------------------------|------------|------------|---------------------------|
| 1  |         |                                                 |            |            |                           |
| 2  | Germany | Cyclist road injuries                           | 0 (0 to 0) | 0 (0 to 0) | -33% (-43.1% to -22.3%)   |
| 3  | Germany | Drowning                                        | 0 (0 to 0) | 0 (0 to 0) | 58.1% (41.9% to 77.2%)    |
| 4  | Germany | Environmental heat and cold exposure            | 0 (0 to 0) | 0 (0 to 0) | -2% (-6.4% to 2.5%)       |
| 5  | Germany | Executions and police conflict                  | 0 (0 to 0) | 0 (0 to 0) | NA                        |
| 6  | Germany | Exposure to forces of nature                    | 0 (0 to 0) | 0 (0 to 0) | NA                        |
| 7  | Germany | Falls                                           | 6 (4 to 8) | 6 (5 to 9) | 10% (5.3% to 14.6%)       |
| 8  | Germany | Fire, heat, and hot substances                  | 0 (0 to 0) | 0 (0 to 0) | -10% (-15.3% to -5.2%)    |
| 9  | Germany | Foreign body in eyes                            | 0 (0 to 0) | 0 (0 to 0) | 0% (0% to 0%)             |
| 10 | Germany | Foreign body in other body part                 | 0 (0 to 0) | 0 (0 to 0) | 1.5% (-2.3% to 5.3%)      |
| 11 | Germany | Motor vehicle road injuries                     | 1 (0 to 1) | 0 (0 to 1) | -53% (-60.9% to -45%)     |
| 12 | Germany | Motorcyclist road injuries                      | 0 (0 to 0) | 0 (0 to 0) | -26.2% (-40.9% to -8.8%)  |
| 13 | Germany | Non-venomous animal contact                     | 0 (0 to 0) | 0 (0 to 0) | -10.7% (-14.6% to -6.4%)  |
| 14 | Germany | Other exposure to mechanical forces             | 0 (0 to 1) | 0 (0 to 1) | -0.8% (-6.9% to 4.1%)     |
| 15 | Germany | Other road injuries                             | 0 (0 to 0) | 0 (0 to 0) | -17.3% (-29.2% to -3.7%)  |
| 16 | Germany | Other transport injuries                        | 0 (0 to 0) | 0 (0 to 0) | -5.8% (-10.6% to -0.9%)   |
| 17 | Germany | Other unintentional injuries                    | 0 (0 to 0) | 0 (0 to 0) | -7.8% (-12.5% to -3.4%)   |
| 18 | Germany | Pedestrian road injuries                        | 0 (0 to 0) | 0 (0 to 0) | -42% (-51.9% to -30.6%)   |
| 19 | Germany | Physical violence by firearm                    | 0 (0 to 0) | 0 (0 to 0) | 30.3% (17.3% to 46.7%)    |
| 20 | Germany | Physical violence by other means                | 0 (0 to 0) | 0 (0 to 0) | -17.5% (-24.8% to -10.6%) |
| 21 | Germany | Physical violence by sharp object               | 0 (0 to 0) | 0 (0 to 0) | -23.3% (-32.8% to -14.4%) |
| 22 | Germany | Poisoning by carbon monoxide                    | 0 (0 to 0) | 0 (0 to 0) | 10.2% (2.7% to 18.5%)     |
| 23 | Germany | Poisoning by other means                        | 0 (0 to 0) | 0 (0 to 0) | -1.9% (-7% to 4.3%)       |
| 24 | Germany | Pulmonary aspiration and foreign body in airway | 0 (0 to 0) | 0 (0 to 0) | -10.2% (-17.9% to -2.4%)  |
| 25 | Germany | Self-harm by firearm                            | 0 (0 to 0) | 0 (0 to 0) | -5% (-16.4% to 8.8%)      |
| 26 | Germany | Self-harm by other specified means              | 0 (0 to 1) | 0 (0 to 0) | -24.7% (-28.7% to -20.5%) |
| 27 | Germany | Unintentional firearm injuries                  | 0 (0 to 0) | 0 (0 to 0) | 2.5% (-4.5% to 9.8%)      |
| 28 | Germany | Venomous animal contact                         | 0 (0 to 0) | 0 (0 to 0) | -13% (-18.6% to -6.4%)    |
| 29 | Ghana   | Adverse effects of medical treatment            | 0 (0 to 0) | 0 (0 to 0) | 0% (0% to 0%)             |
| 30 | Ghana   | Conflict and terrorism                          | 0 (0 to 0) | 0 (0 to 0) | NA                        |
| 31 | Ghana   | Cyclist road injuries                           | 1 (1 to 3) | 2 (1 to 3) | 28.2% (19.9% to 38.7%)    |
| 32 | Ghana   | Drowning                                        | 0 (0 to 0) | 0 (0 to 0) | 13.8% (4.2% to 23.6%)     |
| 33 | Ghana   | Environmental heat and cold exposure            | 0 (0 to 0) | 0 (0 to 0) | 1.4% (-3.2% to 6.4%)      |
| 34 | Ghana   | Executions and police conflict                  | 0 (0 to 0) | 0 (0 to 0) | NA                        |
| 35 | Ghana   | Exposure to forces of nature                    | 0 (0 to 0) | 0 (0 to 0) | NA                        |
| 36 | Ghana   | Falls                                           | 3 (2 to 4) | 4 (3 to 5) | 26.3% (21.4% to 31.2%)    |
| 37 | Ghana   | Fire, heat, and hot substances                  | 0 (0 to 0) | 0 (0 to 0) | -2% (-6.4% to 2.7%)       |
| 38 | Ghana   | Foreign body in eyes                            | 0 (0 to 0) | 0 (0 to 0) | 0% (0% to 0%)             |
| 39 | Ghana   | Foreign body in other body part                 | 1 (0 to 1) | 1 (0 to 1) | 2.6% (-0.9% to 6.3%)      |
| 40 | Ghana   | Motor vehicle road injuries                     | 2 (1 to 3) | 2 (1 to 4) | 21.5% (13.1% to 31.9%)    |
| 41 | Ghana   | Motorcyclist road injuries                      | 0 (0 to 1) | 1 (0 to 1) | 45.7% (35.4% to 57.9%)    |
| 42 | Ghana   | Non-venomous animal contact                     | 0 (0 to 0) | 0 (0 to 0) | -12.6% (-16.7% to -8.7%)  |
| 43 | Ghana   | Other exposure to mechanical forces             | 0 (0 to 0) | 0 (0 to 0) | -2.2% (-7.6% to 3.3%)     |
| 44 | Ghana   | Other road injuries                             | 0 (0 to 0) | 0 (0 to 0) | 21.8% (12.6% to 33.8%)    |
| 45 |         |                                                 |            |            |                           |
| 46 |         |                                                 |            |            |                           |

|    |           |                                                 |            |            |                           |
|----|-----------|-------------------------------------------------|------------|------------|---------------------------|
| 1  |           |                                                 |            |            |                           |
| 2  | Ghana     | Other transport injuries                        | 0 (0 to 1) | 0 (0 to 1) | 1.3% (-2.9% to 5.5%)      |
| 3  | Ghana     | Other unintentional injuries                    | 0 (0 to 0) | 0 (0 to 0) | -5.5% (-11.2% to 0.1%)    |
| 4  | Ghana     | Pedestrian road injuries                        | 2 (1 to 4) | 3 (1 to 5) | 17.6% (10.5% to 25.7%)    |
| 5  | Ghana     | Physical violence by firearm                    | 0 (0 to 0) | 0 (0 to 0) | 40.3% (20.3% to 61.8%)    |
| 6  | Ghana     | Physical violence by other means                | 0 (0 to 0) | 0 (0 to 0) | -4.8% (-11.2% to 1.4%)    |
| 7  | Ghana     | Physical violence by sharp object               | 0 (0 to 0) | 0 (0 to 0) | -7.2% (-15.1% to 0%)      |
| 8  | Ghana     | Poisoning by carbon monoxide                    | 0 (0 to 0) | 0 (0 to 0) | 20.8% (8.1% to 34.3%)     |
| 9  | Ghana     | Poisoning by other means                        | 0 (0 to 0) | 0 (0 to 0) | -8.8% (-15.1% to -1.8%)   |
| 10 | Ghana     | Pulmonary aspiration and foreign body in airway | 0 (0 to 0) | 0 (0 to 0) | -5.6% (-12.9% to 2.3%)    |
| 11 | Ghana     | Self-harm by firearm                            | 0 (0 to 0) | 0 (0 to 0) | 27.8% (15.8% to 43.2%)    |
| 12 | Ghana     | Self-harm by other specified means              | 0 (0 to 0) | 0 (0 to 0) | 27.1% (20.8% to 34.7%)    |
| 13 | Ghana     | Unintentional firearm injuries                  | 0 (0 to 0) | 0 (0 to 0) | -11.3% (-18.9% to -3.5%)  |
| 14 | Ghana     | Venomous animal contact                         | 0 (0 to 0) | 0 (0 to 0) | -19.5% (-25.6% to -13%)   |
| 15 | Greece    | Adverse effects of medical treatment            | 0 (0 to 0) | 0 (0 to 0) | 0% (0% to 0%)             |
| 16 | Greece    | Conflict and terrorism                          | 0 (0 to 0) | 0 (0 to 0) | NA                        |
| 17 | Greece    | Cyclist road injuries                           | 0 (0 to 0) | 0 (0 to 0) | -10.4% (-21.7% to 3.1%)   |
| 18 | Greece    | Drowning                                        | 0 (0 to 0) | 0 (0 to 0) | 67.6% (53.4% to 85.1%)    |
| 19 | Greece    | Environmental heat and cold exposure            | 0 (0 to 0) | 0 (0 to 0) | -4.7% (-9.3% to 0.1%)     |
| 20 | Greece    | Executions and police conflict                  | 0 (0 to 0) | 0 (0 to 0) | NA                        |
| 21 | Greece    | Exposure to forces of nature                    | 0 (0 to 0) | 0 (0 to 0) | NA                        |
| 22 | Greece    | Falls                                           | 5 (4 to 6) | 4 (3 to 6) | -7.7% (-12.8% to -2.8%)   |
| 23 | Greece    | Fire, heat, and hot substances                  | 0 (0 to 0) | 0 (0 to 0) | -18.4% (-23.3% to -13.8%) |
| 24 | Greece    | Foreign body in eyes                            | 0 (0 to 0) | 0 (0 to 0) | 0% (0% to 0%)             |
| 25 | Greece    | Foreign body in other body part                 | 0 (0 to 0) | 0 (0 to 0) | 0.4% (-3.6% to 3.8%)      |
| 26 | Greece    | Motor vehicle road injuries                     | 1 (0 to 1) | 0 (0 to 1) | -44.7% (-52.6% to -37.4%) |
| 27 | Greece    | Motorcyclist road injuries                      | 0 (0 to 0) | 0 (0 to 0) | 16.3% (-5.5% to 39.4%)    |
| 28 | Greece    | Non-venomous animal contact                     | 0 (0 to 0) | 0 (0 to 0) | -7.4% (-11.3% to -3.5%)   |
| 29 | Greece    | Other exposure to mechanical forces             | 0 (0 to 1) | 1 (0 to 1) | 7.1% (2.2% to 13%)        |
| 30 | Greece    | Other road injuries                             | 0 (0 to 0) | 0 (0 to 0) | -9.5% (-21.4% to 3.9%)    |
| 31 | Greece    | Other transport injuries                        | 0 (0 to 0) | 0 (0 to 0) | 12.7% (7.1% to 19.6%)     |
| 32 | Greece    | Other unintentional injuries                    | 0 (0 to 0) | 0 (0 to 0) | -23% (-29.7% to -17.8%)   |
| 33 | Greece    | Pedestrian road injuries                        | 0 (0 to 0) | 0 (0 to 0) | -39.6% (-47.9% to -30.2%) |
| 34 | Greece    | Physical violence by firearm                    | 0 (0 to 0) | 0 (0 to 0) | 9.8% (0.2% to 21.5%)      |
| 35 | Greece    | Physical violence by other means                | 0 (0 to 0) | 0 (0 to 0) | -4.9% (-10.9% to 2%)      |
| 36 | Greece    | Physical violence by sharp object               | 0 (0 to 0) | 0 (0 to 0) | -11.6% (-19.1% to -3.9%)  |
| 37 | Greece    | Poisoning by carbon monoxide                    | 0 (0 to 0) | 0 (0 to 0) | 4.8% (-3.1% to 12.6%)     |
| 38 | Greece    | Poisoning by other means                        | 0 (0 to 0) | 0 (0 to 0) | -7.7% (-13.8% to -2.4%)   |
| 39 | Greece    | Pulmonary aspiration and foreign body in airway | 0 (0 to 0) | 0 (0 to 0) | -38.4% (-45.2% to -29.6%) |
| 40 | Greece    | Self-harm by firearm                            | 0 (0 to 0) | 0 (0 to 0) | 8.9% (-0.3% to 20.4%)     |
| 41 | Greece    | Self-harm by other specified means              | 0 (0 to 0) | 0 (0 to 0) | 4.5% (0% to 10%)          |
| 42 | Greece    | Unintentional firearm injuries                  | 0 (0 to 0) | 0 (0 to 0) | -12.5% (-19% to -6.2%)    |
| 43 | Greece    | Venomous animal contact                         | 0 (0 to 0) | 0 (0 to 0) | -6.8% (-12.6% to -1.1%)   |
| 44 | Greenland | Adverse effects of medical treatment            | 0 (0 to 0) | 0 (0 to 0) | 0% (0% to 0%)             |
| 45 |           |                                                 |            |            |                           |
| 46 |           |                                                 |            |            |                           |

|    |           |                                                 |               |               |                           |
|----|-----------|-------------------------------------------------|---------------|---------------|---------------------------|
| 1  |           |                                                 |               |               |                           |
| 2  | Greenland | Conflict and terrorism                          | 0 (0 to 0)    | 0 (0 to 0)    | NA                        |
| 3  | Greenland | Cyclist road injuries                           | 0 (0 to 1)    | 0 (0 to 1)    | -17.5% (-26.2% to -7.9%)  |
| 4  | Greenland | Drowning                                        | 0 (0 to 0)    | 0 (0 to 0)    | -0.1% (-8.3% to 7.7%)     |
| 5  | Greenland | Environmental heat and cold exposure            | 0 (0 to 0)    | 0 (0 to 0)    | -27.9% (-31.5% to -24.4%) |
| 6  | Greenland | Executions and police conflict                  | 0 (0 to 0)    | 0 (0 to 0)    | NA                        |
| 7  | Greenland | Exposure to forces of nature                    | 0 (0 to 0)    | 0 (0 to 0)    | NA                        |
| 8  | Greenland | Falls                                           | 26 (17 to 37) | 23 (15 to 34) | -10.4% (-13.6% to -6.7%)  |
| 9  | Greenland | Fire, heat, and hot substances                  | 1 (0 to 1)    | 0 (0 to 1)    | -40.3% (-43.5% to -36.9%) |
| 10 | Greenland | Foreign body in eyes                            | 0 (0 to 0)    | 0 (0 to 0)    | 0% (0% to 0%)             |
| 11 | Greenland | Foreign body in other body part                 | 1 (0 to 1)    | 1 (0 to 1)    | 0.8% (-2.5% to 4%)        |
| 12 | Greenland | Motor vehicle road injuries                     | 1 (1 to 2)    | 1 (0 to 1)    | -25.9% (-32% to -19.2%)   |
| 13 | Greenland | Motorcyclist road injuries                      | 0 (0 to 1)    | 0 (0 to 1)    | -11.9% (-20.6% to -2.6%)  |
| 14 | Greenland | Non-venomous animal contact                     | 0 (0 to 1)    | 0 (0 to 0)    | -33.3% (-39.6% to -27.7%) |
| 15 | Greenland | Other exposure to mechanical forces             | 1 (1 to 2)    | 1 (0 to 2)    | -35% (-39.7% to -30.4%)   |
| 16 | Greenland | Other road injuries                             | 0 (0 to 0)    | 0 (0 to 0)    | -26.8% (-36.7% to -16.4%) |
| 17 | Greenland | Other transport injuries                        | 4 (2 to 7)    | 3 (2 to 4)    | -37.2% (-40.6% to -33.4%) |
| 18 | Greenland | Other unintentional injuries                    | 2 (1 to 3)    | 1 (1 to 2)    | -25% (-29.7% to -20.5%)   |
| 19 | Greenland | Pedestrian road injuries                        | 0 (0 to 1)    | 0 (0 to 0)    | -40.6% (-47.6% to -32.7%) |
| 20 | Greenland | Physical violence by firearm                    | 0 (0 to 0)    | 0 (0 to 0)    | 2.2% (-9.2% to 16.6%)     |
| 21 | Greenland | Physical violence by other means                | 1 (0 to 1)    | 1 (0 to 1)    | -28.4% (-32.9% to -23.2%) |
| 22 | Greenland | Physical violence by sharp object               | 0 (0 to 0)    | 0 (0 to 0)    | -33.3% (-40% to -25.1%)   |
| 23 | Greenland | Poisoning by carbon monoxide                    | 0 (0 to 0)    | 0 (0 to 0)    | -29.4% (-38.4% to -19.5%) |
| 24 | Greenland | Poisoning by other means                        | 0 (0 to 0)    | 0 (0 to 0)    | -31.6% (-37% to -26.3%)   |
| 25 | Greenland | Pulmonary aspiration and foreign body in airway | 0 (0 to 0)    | 0 (0 to 0)    | -24.3% (-30.1% to -19%)   |
| 26 | Greenland | Self-harm by firearm                            | 0 (0 to 0)    | 0 (0 to 0)    | -40.4% (-48.6% to -31.3%) |
| 27 | Greenland | Self-harm by other specified means              | 1 (0 to 2)    | 1 (0 to 1)    | -25.6% (-29% to -21.5%)   |
| 28 | Greenland | Unintentional firearm injuries                  | 0 (0 to 0)    | 0 (0 to 0)    | -59.9% (-66.3% to -53.7%) |
| 29 | Greenland | Venomous animal contact                         | 0 (0 to 0)    | 0 (0 to 0)    | 4.6% (-3.4% to 15.4%)     |
| 30 | Grenada   | Adverse effects of medical treatment            | 0 (0 to 0)    | 0 (0 to 0)    | 0% (0% to 0%)             |
| 31 | Grenada   | Conflict and terrorism                          | 0 (0 to 0)    | 0 (0 to 0)    | NA                        |
| 32 | Grenada   | Cyclist road injuries                           | 0 (0 to 1)    | 0 (0 to 0)    | -16.5% (-24.1% to -7%)    |
| 33 | Grenada   | Drowning                                        | 0 (0 to 0)    | 0 (0 to 0)    | 24.1% (11.2% to 37.3%)    |
| 34 | Grenada   | Environmental heat and cold exposure            | 0 (0 to 1)    | 0 (0 to 1)    | 8.9% (4.8% to 13.2%)      |
| 35 | Grenada   | Executions and police conflict                  | 0 (0 to 0)    | 0 (0 to 0)    | NA                        |
| 36 | Grenada   | Exposure to forces of nature                    | 0 (0 to 0)    | 0 (0 to 0)    | NA                        |
| 37 | Grenada   | Falls                                           | 1 (1 to 2)    | 2 (1 to 3)    | 68% (62% to 74.9%)        |
| 38 | Grenada   | Fire, heat, and hot substances                  | 0 (0 to 0)    | 0 (0 to 0)    | -11.7% (-17.1% to -5.6%)  |
| 39 | Grenada   | Foreign body in eyes                            | 0 (0 to 0)    | 0 (0 to 0)    | 0% (0% to 0%)             |
| 40 | Grenada   | Foreign body in other body part                 | 0 (0 to 0)    | 0 (0 to 0)    | -0.6% (-4.7% to 3.8%)     |
| 41 | Grenada   | Motor vehicle road injuries                     | 0 (0 to 1)    | 0 (0 to 1)    | -17% (-25% to -7.6%)      |
| 42 | Grenada   | Motorcyclist road injuries                      | 0 (0 to 0)    | 0 (0 to 0)    | 17.6% (4.3% to 35.9%)     |
| 43 | Grenada   | Non-venomous animal contact                     | 0 (0 to 0)    | 0 (0 to 0)    | 21.2% (9.3% to 37.8%)     |
| 44 | Grenada   | Other exposure to mechanical forces             | 0 (0 to 1)    | 1 (0 to 1)    | 41.4% (29.5% to 56.8%)    |
| 45 |           |                                                 |               |               |                           |
| 46 |           |                                                 |               |               |                           |

|    |         |                                                 |            |            |                           |
|----|---------|-------------------------------------------------|------------|------------|---------------------------|
| 1  |         |                                                 |            |            |                           |
| 2  | Grenada | Other road injuries                             | 0 (0 to 0) | 0 (0 to 0) | -10.8% (-20.2% to -0.2%)  |
| 3  | Grenada | Other transport injuries                        | 0 (0 to 0) | 0 (0 to 0) | 20.5% (13.4% to 28.6%)    |
| 4  | Grenada | Other unintentional injuries                    | 0 (0 to 0) | 0 (0 to 0) | -3.6% (-8.6% to 1.5%)     |
| 5  | Grenada | Pedestrian road injuries                        | 0 (0 to 0) | 0 (0 to 0) | -24.7% (-32% to -16.3%)   |
| 6  | Grenada | Physical violence by firearm                    | 0 (0 to 0) | 0 (0 to 0) | 50.8% (34.4% to 74.4%)    |
| 7  | Grenada | Physical violence by other means                | 0 (0 to 0) | 0 (0 to 0) | 71.1% (52% to 96.7%)      |
| 8  | Grenada | Physical violence by sharp object               | 0 (0 to 0) | 0 (0 to 0) | 9.4% (-3.5% to 24.2%)     |
| 9  | Grenada | Poisoning by carbon monoxide                    | 0 (0 to 0) | 0 (0 to 0) | 30.3% (9.8% to 52.8%)     |
| 10 | Grenada | Poisoning by other means                        | 0 (0 to 0) | 0 (0 to 0) | -32.7% (-43.7% to -21.9%) |
| 11 | Grenada | Pulmonary aspiration and foreign body in airway | 0 (0 to 0) | 0 (0 to 0) | -24.6% (-31.2% to -18%)   |
| 12 | Grenada | Self-harm by firearm                            | 0 (0 to 0) | 0 (0 to 0) | 7.7% (-3.5% to 21.7%)     |
| 13 | Grenada | Self-harm by other specified means              | 0 (0 to 0) | 0 (0 to 0) | -15.2% (-22.8% to -7.8%)  |
| 14 | Grenada | Unintentional firearm injuries                  | 0 (0 to 0) | 0 (0 to 1) | 6.7% (-7.4% to 18.5%)     |
| 15 | Guam    | Venomous animal contact                         | 0 (0 to 0) | 0 (0 to 0) | -8.1% (-16.2% to 0.1%)    |
| 16 | Guam    | Adverse effects of medical treatment            | 0 (0 to 0) | 0 (0 to 0) | 0% (0% to 0%)             |
| 17 | Guam    | Conflict and terrorism                          | 0 (0 to 0) | 0 (0 to 0) | NA                        |
| 18 | Guam    | Cyclist road injuries                           | 0 (0 to 1) | 0 (0 to 1) | -5.8% (-14.1% to 3.2%)    |
| 19 | Guam    | Drowning                                        | 0 (0 to 0) | 0 (0 to 0) | 5.4% (-2.5% to 14.1%)     |
| 20 | Guam    | Environmental heat and cold exposure            | 0 (0 to 0) | 0 (0 to 0) | 0.6% (-5% to 6.8%)        |
| 21 | Guam    | Executions and police conflict                  | 0 (0 to 0) | 0 (0 to 0) | NA                        |
| 22 | Guam    | Exposure to forces of nature                    | 0 (0 to 0) | 0 (0 to 0) | NA                        |
| 23 | Guam    | Falls                                           | 4 (3 to 5) | 5 (3 to 7) | 29.1% (24.3% to 33.4%)    |
| 24 | Guam    | Fire, heat, and hot substances                  | 0 (0 to 0) | 0 (0 to 0) | 9.3% (3.9% to 15.2%)      |
| 25 | Guam    | Foreign body in eyes                            | 0 (0 to 0) | 0 (0 to 0) | 0% (0% to 0%)             |
| 26 | Guam    | Foreign body in other body part                 | 0 (0 to 0) | 0 (0 to 0) | -2.9% (-8.4% to 1.1%)     |
| 27 | Guam    | Motor vehicle road injuries                     | 1 (1 to 2) | 1 (0 to 2) | -36.4% (-42.6% to -30.4%) |
| 28 | Guam    | Motorcyclist road injuries                      | 1 (0 to 2) | 1 (0 to 2) | 6.3% (-3.9% to 19.6%)     |
| 29 | Guam    | Non-venomous animal contact                     | 0 (0 to 0) | 0 (0 to 0) | -9.1% (-12.8% to -4.9%)   |
| 30 | Guam    | Other exposure to mechanical forces             | 0 (0 to 0) | 0 (0 to 0) | -27.5% (-33.6% to -21.6%) |
| 31 | Guam    | Other road injuries                             | 0 (0 to 0) | 0 (0 to 0) | -8.4% (-17.8% to 2.4%)    |
| 32 | Guam    | Other transport injuries                        | 0 (0 to 1) | 0 (0 to 1) | -13.2% (-18.4% to -8.7%)  |
| 33 | Guam    | Other unintentional injuries                    | 0 (0 to 0) | 0 (0 to 0) | -6.5% (-11.4% to -1.6%)   |
| 34 | Guam    | Pedestrian road injuries                        | 1 (0 to 1) | 1 (0 to 1) | -21.6% (-29% to -13.8%)   |
| 35 | Guam    | Physical violence by firearm                    | 0 (0 to 0) | 0 (0 to 0) | -52.1% (-61.8% to -42.7%) |
| 36 | Guam    | Physical violence by other means                | 1 (0 to 1) | 1 (0 to 1) | -10.7% (-16.7% to -3.7%)  |
| 37 | Guam    | Physical violence by sharp object               | 0 (0 to 0) | 0 (0 to 0) | -50% (-57.6% to -42.9%)   |
| 38 | Guam    | Poisoning by carbon monoxide                    | 0 (0 to 0) | 0 (0 to 0) | 9.3% (0.3% to 18.8%)      |
| 39 | Guam    | Poisoning by other means                        | 0 (0 to 0) | 0 (0 to 0) | -7.6% (-14% to -1.7%)     |
| 40 | Guam    | Pulmonary aspiration and foreign body in airway | 0 (0 to 0) | 0 (0 to 0) | -2.6% (-11.5% to 7.9%)    |
| 41 | Guam    | Self-harm by firearm                            | 0 (0 to 0) | 0 (0 to 0) | -5.2% (-25% to 14.6%)     |
| 42 | Guam    | Self-harm by other specified means              | 0 (0 to 0) | 0 (0 to 0) | 27% (16.4% to 40.3%)      |
| 43 | Guam    | Unintentional firearm injuries                  | 0 (0 to 0) | 0 (0 to 0) | -26.8% (-36.2% to -19.5%) |
| 44 | Guam    | Venomous animal contact                         | 0 (0 to 0) | 0 (0 to 0) | -12.6% (-19% to -6.2%)    |
| 45 |         |                                                 |            |            |                           |
| 46 |         |                                                 |            |            |                           |

|    |           |                                                 |             |            |                           |
|----|-----------|-------------------------------------------------|-------------|------------|---------------------------|
| 1  |           |                                                 |             |            |                           |
| 2  | Guatemala | Adverse effects of medical treatment            | 0 (0 to 0)  | 0 (0 to 0) | 0% (0% to 0%)             |
| 3  | Guatemala | Conflict and terrorism                          | 5 (1 to 15) | 0 (0 to 0) | NA                        |
| 4  | Guatemala | Cyclist road injuries                           | 0 (0 to 0)  | 0 (0 to 0) | -11.7% (-18.6% to -2.8%)  |
| 5  | Guatemala | Drowning                                        | 0 (0 to 0)  | 0 (0 to 0) | -2% (-14.4% to 10.7%)     |
| 6  | Guatemala | Environmental heat and cold exposure            | 0 (0 to 0)  | 0 (0 to 0) | 41.8% (30.1% to 53.8%)    |
| 7  | Guatemala | Executions and police conflict                  | 0 (0 to 0)  | 0 (0 to 0) | NA                        |
| 8  | Guatemala | Exposure to forces of nature                    | 0 (0 to 0)  | 0 (0 to 0) | NA                        |
| 9  | Guatemala | Falls                                           | 2 (2 to 3)  | 3 (2 to 4) | 10.6% (6.7% to 14.9%)     |
| 10 | Guatemala | Fire, heat, and hot substances                  | 0 (0 to 0)  | 0 (0 to 0) | -31.5% (-37.3% to -25.2%) |
| 11 | Guatemala | Foreign body in eyes                            | 0 (0 to 0)  | 0 (0 to 0) | 0% (0% to 0%)             |
| 12 | Guatemala | Foreign body in other body part                 | 0 (0 to 0)  | 0 (0 to 0) | -42% (-48.1% to -35.9%)   |
| 13 | Guatemala | Motor vehicle road injuries                     | 0 (0 to 1)  | 0 (0 to 1) | 24.2% (13.6% to 37.8%)    |
| 14 | Guatemala | Motorcyclist road injuries                      | 0 (0 to 0)  | 0 (0 to 0) | 32.8% (19.7% to 49%)      |
| 15 | Guatemala | Non-venomous animal contact                     | 0 (0 to 0)  | 0 (0 to 0) | -18.5% (-22.7% to -14.9%) |
| 16 | Guatemala | Other exposure to mechanical forces             | 0 (0 to 1)  | 0 (0 to 1) | 48.5% (33.3% to 67.6%)    |
| 17 | Guatemala | Other road injuries                             | 0 (0 to 0)  | 0 (0 to 0) | -3.7% (-15.3% to 10.8%)   |
| 18 | Guatemala | Other transport injuries                        | 0 (0 to 0)  | 0 (0 to 0) | 38.1% (23.7% to 56.3%)    |
| 19 | Guatemala | Other unintentional injuries                    | 0 (0 to 0)  | 0 (0 to 0) | -17.5% (-22.8% to -11.9%) |
| 20 | Guatemala | Pedestrian road injuries                        | 0 (0 to 0)  | 0 (0 to 0) | -24.8% (-33.5% to -15.8%) |
| 21 | Guatemala | Physical violence by firearm                    | 0 (0 to 0)  | 0 (0 to 1) | 143.8% (82% to 235.9%)    |
| 22 | Guatemala | Physical violence by other means                | 1 (0 to 1)  | 0 (0 to 0) | -68.4% (-75.8% to -61.1%) |
| 23 | Guatemala | Physical violence by sharp object               | 0 (0 to 1)  | 0 (0 to 0) | -29.7% (-46% to -11.3%)   |
| 24 | Guatemala | Poisoning by carbon monoxide                    | 0 (0 to 0)  | 0 (0 to 0) | 40.5% (21.7% to 65.7%)    |
| 25 | Guatemala | Poisoning by other means                        | 0 (0 to 0)  | 0 (0 to 0) | -4.8% (-11.8% to 2.4%)    |
| 26 | Guatemala | Pulmonary aspiration and foreign body in airway | 0 (0 to 0)  | 0 (0 to 0) | -55.1% (-59.8% to -49.7%) |
| 27 | Guatemala | Self-harm by firearm                            | 0 (0 to 0)  | 0 (0 to 0) | -15.9% (-34.3% to -0.8%)  |
| 28 | Guatemala | Self-harm by other specified means              | 0 (0 to 0)  | 0 (0 to 0) | 28.7% (16.4% to 43.6%)    |
| 29 | Guatemala | Unintentional firearm injuries                  | 0 (0 to 0)  | 0 (0 to 1) | 91.4% (69.7% to 122%)     |
| 30 | Guatemala | Venomous animal contact                         | 0 (0 to 0)  | 0 (0 to 0) | -11% (-15.3% to -6.2%)    |
| 31 | Guinea    | Adverse effects of medical treatment            | 0 (0 to 0)  | 0 (0 to 0) | 0% (0% to 0%)             |
| 32 | Guinea    | Conflict and terrorism                          | 0 (0 to 0)  | 0 (0 to 0) | NA                        |
| 33 | Guinea    | Cyclist road injuries                           | 1 (0 to 2)  | 1 (1 to 3) | 23.6% (15.3% to 32.9%)    |
| 34 | Guinea    | Drowning                                        | 0 (0 to 0)  | 0 (0 to 0) | -8.6% (-15.1% to -2.6%)   |
| 35 | Guinea    | Environmental heat and cold exposure            | 0 (0 to 0)  | 0 (0 to 0) | 6.3% (1.4% to 12.5%)      |
| 36 | Guinea    | Executions and police conflict                  | 0 (0 to 0)  | 0 (0 to 0) | NA                        |
| 37 | Guinea    | Exposure to forces of nature                    | 0 (0 to 0)  | 0 (0 to 0) | NA                        |
| 38 | Guinea    | Falls                                           | 2 (2 to 3)  | 3 (2 to 4) | 18.1% (13.8% to 22.1%)    |
| 39 | Guinea    | Fire, heat, and hot substances                  | 0 (0 to 0)  | 0 (0 to 0) | -0.4% (-6.2% to 5.3%)     |
| 40 | Guinea    | Foreign body in eyes                            | 0 (0 to 0)  | 0 (0 to 0) | 0% (0% to 0%)             |
| 41 | Guinea    | Foreign body in other body part                 | 1 (0 to 1)  | 1 (0 to 1) | 0.3% (-3.5% to 4.4%)      |
| 42 | Guinea    | Motor vehicle road injuries                     | 2 (1 to 3)  | 2 (1 to 3) | 19.8% (10.7% to 30.1%)    |
| 43 | Guinea    | Motorcyclist road injuries                      | 1 (0 to 1)  | 1 (0 to 2) | 27.4% (16.9% to 39.1%)    |
| 44 | Guinea    | Non-venomous animal contact                     | 0 (0 to 0)  | 0 (0 to 0) | 4.2% (-0.3% to 9.3%)      |
| 45 |           |                                                 |             |            |                           |
| 46 |           |                                                 |             |            |                           |

|    |               |                                                 |            |            |                           |
|----|---------------|-------------------------------------------------|------------|------------|---------------------------|
| 1  |               |                                                 |            |            |                           |
| 2  | Guinea        | Other exposure to mechanical forces             | 0 (0 to 0) | 0 (0 to 0) | -9.4% (-14.3% to -4.9%)   |
| 3  | Guinea        | Other road injuries                             | 0 (0 to 0) | 0 (0 to 0) | 12.9% (3.8% to 23.1%)     |
| 4  | Guinea        | Other transport injuries                        | 0 (0 to 1) | 0 (0 to 1) | -1.4% (-5% to 2.4%)       |
| 5  | Guinea        | Other unintentional injuries                    | 0 (0 to 1) | 0 (0 to 0) | -11.2% (-15.2% to -6.6%)  |
| 6  | Guinea        | Pedestrian road injuries                        | 2 (1 to 3) | 2 (1 to 4) | 13.4% (5.8% to 20.9%)     |
| 7  | Guinea        | Physical violence by firearm                    | 0 (0 to 0) | 0 (0 to 0) | 29.1% (17.8% to 41.7%)    |
| 8  | Guinea        | Physical violence by other means                | 0 (0 to 0) | 0 (0 to 0) | 20.5% (13.2% to 28.4%)    |
| 9  | Guinea        | Physical violence by sharp object               | 0 (0 to 0) | 0 (0 to 0) | 18.3% (9.6% to 27.7%)     |
| 10 | Guinea        | Poisoning by carbon monoxide                    | 0 (0 to 0) | 0 (0 to 0) | 10.1% (-1.8% to 23.6%)    |
| 11 | Guinea        | Poisoning by other means                        | 0 (0 to 0) | 0 (0 to 0) | -15% (-21.5% to -8.6%)    |
| 12 | Guinea        | Pulmonary aspiration and foreign body in airway | 0 (0 to 0) | 0 (0 to 0) | -3.6% (-13.2% to 7%)      |
| 13 | Guinea        | Self-harm by firearm                            | 0 (0 to 0) | 0 (0 to 0) | 31.6% (18.9% to 49.1%)    |
| 14 | Guinea        | Self-harm by other specified means              | 0 (0 to 0) | 0 (0 to 0) | 29.5% (23.3% to 36.3%)    |
| 15 | Guinea        | Unintentional firearm injuries                  | 0 (0 to 0) | 0 (0 to 0) | -13.5% (-19.9% to -6.9%)  |
| 16 | Guinea-Bissau | Venomous animal contact                         | 0 (0 to 0) | 0 (0 to 0) | 6.3% (-0.5% to 13.9%)     |
| 17 | Guinea-Bissau | Adverse effects of medical treatment            | 0 (0 to 0) | 0 (0 to 0) | 0% (0% to 0%)             |
| 18 | Guinea-Bissau | Conflict and terrorism                          | 0 (0 to 0) | 0 (0 to 0) | NA                        |
| 19 | Guinea-Bissau | Cyclist road injuries                           | 1 (1 to 3) | 1 (1 to 3) | 7.2% (-0.6% to 15.4%)     |
| 20 | Guinea-Bissau | Drowning                                        | 0 (0 to 0) | 0 (0 to 0) | -22.8% (-27.9% to -17.1%) |
| 21 | Guinea-Bissau | Environmental heat and cold exposure            | 0 (0 to 0) | 0 (0 to 0) | -1.8% (-6.7% to 3.3%)     |
| 22 | Guinea-Bissau | Executions and police conflict                  | 0 (0 to 0) | 0 (0 to 0) | NA                        |
| 23 | Guinea-Bissau | Exposure to forces of nature                    | 0 (0 to 0) | 0 (0 to 0) | NA                        |
| 24 | Guinea-Bissau | Falls                                           | 3 (2 to 4) | 3 (2 to 4) | 8.7% (4.9% to 12.9%)      |
| 25 | Guinea-Bissau | Fire, heat, and hot substances                  | 0 (0 to 0) | 0 (0 to 0) | -11.8% (-16.9% to -6.4%)  |
| 26 | Guinea-Bissau | Foreign body in eyes                            | 0 (0 to 0) | 0 (0 to 0) | 0% (0% to 0%)             |
| 27 | Guinea-Bissau | Foreign body in other body part                 | 1 (0 to 1) | 1 (0 to 1) | -1.9% (-5.3% to 2%)       |
| 28 | Guinea-Bissau | Motor vehicle road injuries                     | 2 (1 to 4) | 2 (1 to 4) | 3.8% (-3.8% to 11.7%)     |
| 29 | Guinea-Bissau | Motorcyclist road injuries                      | 1 (0 to 2) | 1 (0 to 2) | -5.1% (-12.1% to 3.8%)    |
| 30 | Guinea-Bissau | Non-venomous animal contact                     | 0 (0 to 1) | 0 (0 to 0) | -7.8% (-11.9% to -3.7%)   |
| 31 | Guinea-Bissau | Other exposure to mechanical forces             | 0 (0 to 0) | 0 (0 to 0) | -13.7% (-18.7% to -8.7%)  |
| 32 | Guinea-Bissau | Other road injuries                             | 0 (0 to 0) | 0 (0 to 0) | 2.7% (-5.8% to 12.5%)     |
| 33 | Guinea-Bissau | Other transport injuries                        | 0 (0 to 1) | 0 (0 to 1) | -16% (-19.6% to -12.4%)   |
| 34 | Guinea-Bissau | Other unintentional injuries                    | 0 (0 to 1) | 0 (0 to 0) | -17.6% (-21.4% to -12.9%) |
| 35 | Guinea-Bissau | Pedestrian road injuries                        | 3 (1 to 5) | 2 (1 to 5) | -2.7% (-8.8% to 3.9%)     |
| 36 | Guinea-Bissau | Physical violence by firearm                    | 0 (0 to 0) | 0 (0 to 0) | 13.4% (4.3% to 24.8%)     |
| 37 | Guinea-Bissau | Physical violence by other means                | 0 (0 to 0) | 0 (0 to 0) | 11% (4.8% to 18%)         |
| 38 | Guinea-Bissau | Physical violence by sharp object               | 0 (0 to 0) | 0 (0 to 0) | 10.8% (3.5% to 19.7%)     |
| 39 | Guinea-Bissau | Poisoning by carbon monoxide                    | 0 (0 to 0) | 0 (0 to 0) | 10.8% (-2.1% to 24.5%)    |
| 40 | Guinea-Bissau | Poisoning by other means                        | 0 (0 to 0) | 0 (0 to 0) | -24.6% (-30.7% to -17.5%) |
| 41 | Guinea-Bissau | Pulmonary aspiration and foreign body in airway | 0 (0 to 0) | 0 (0 to 0) | -15.1% (-23.6% to -5.7%)  |
| 42 | Guinea-Bissau | Self-harm by firearm                            | 0 (0 to 0) | 0 (0 to 0) | 13.6% (1.8% to 27.4%)     |
| 43 | Guinea-Bissau | Self-harm by other specified means              | 0 (0 to 0) | 0 (0 to 0) | 8.2% (3.8% to 13.2%)      |
| 44 | Guinea-Bissau | Unintentional firearm injuries                  | 0 (0 to 0) | 0 (0 to 0) | -21.1% (-27.5% to -14.7%) |
| 45 |               |                                                 |            |            |                           |
| 46 |               |                                                 |            |            |                           |



|    |               |                                                 |            |            |                           |
|----|---------------|-------------------------------------------------|------------|------------|---------------------------|
| 1  |               |                                                 |            |            |                           |
| 2  | Guinea-Bissau | Venomous animal contact                         | 0 (0 to 0) | 0 (0 to 0) | -9.4% (-15.1% to -2.2%)   |
| 3  | Guyana        | Adverse effects of medical treatment            | 0 (0 to 0) | 0 (0 to 0) | 0% (0% to 0%)             |
| 4  | Guyana        | Conflict and terrorism                          | 0 (0 to 0) | 0 (0 to 0) | NA                        |
| 5  | Guyana        | Cyclist road injuries                           | 0 (0 to 0) | 0 (0 to 0) | -1.2% (-10.4% to 9.4%)    |
| 6  | Guyana        | Drowning                                        | 0 (0 to 0) | 0 (0 to 0) | 19.6% (8.5% to 32.2%)     |
| 7  | Guyana        | Environmental heat and cold exposure            | 0 (0 to 1) | 0 (0 to 1) | -1.5% (-6.1% to 2.8%)     |
| 8  | Guyana        | Executions and police conflict                  | 0 (0 to 0) | 0 (0 to 0) | NA                        |
| 9  | Guyana        | Exposure to forces of nature                    | 0 (0 to 0) | 0 (0 to 0) | NA                        |
| 10 | Guyana        | Falls                                           | 2 (1 to 3) | 2 (2 to 3) | 22.4% (17.9% to 27.2%)    |
| 11 | Guyana        | Fire, heat, and hot substances                  | 0 (0 to 0) | 0 (0 to 0) | -14.3% (-19.7% to -8.2%)  |
| 12 | Guyana        | Foreign body in eyes                            | 0 (0 to 0) | 0 (0 to 0) | 0% (0% to 0%)             |
| 13 | Guyana        | Foreign body in other body part                 | 0 (0 to 0) | 0 (0 to 0) | -29.1% (-33% to -24.5%)   |
| 14 | Guyana        | Motor vehicle road injuries                     | 0 (0 to 1) | 0 (0 to 1) | 20% (9.2% to 33.3%)       |
| 15 | Guyana        | Motorcyclist road injuries                      | 0 (0 to 0) | 0 (0 to 1) | 63.2% (45.6% to 85.6%)    |
| 16 | Guyana        | Non-venomous animal contact                     | 0 (0 to 0) | 0 (0 to 0) | 23.9% (6.9% to 38.9%)     |
| 17 | Guyana        | Other exposure to mechanical forces             | 0 (0 to 0) | 0 (0 to 1) | 28.3% (20.3% to 37.1%)    |
| 18 | Guyana        | Other road injuries                             | 0 (0 to 0) | 0 (0 to 0) | 6% (-4.4% to 17.9%)       |
| 19 | Guyana        | Other transport injuries                        | 0 (0 to 0) | 0 (0 to 0) | 25.1% (18% to 32.1%)      |
| 20 | Guyana        | Other unintentional injuries                    | 0 (0 to 0) | 0 (0 to 0) | -23.7% (-28.4% to -18.9%) |
| 21 | Guyana        | Pedestrian road injuries                        | 0 (0 to 0) | 0 (0 to 0) | -23.2% (-31.1% to -14.1%) |
| 22 | Guyana        | Physical violence by firearm                    | 0 (0 to 0) | 0 (0 to 0) | 137.2% (102.8% to 186.3%) |
| 23 | Guyana        | Physical violence by other means                | 0 (0 to 0) | 0 (0 to 0) | -5% (-16.3% to 5.8%)      |
| 24 | Guyana        | Physical violence by sharp object               | 0 (0 to 0) | 0 (0 to 0) | 56.3% (35% to 82.2%)      |
| 25 | Guyana        | Poisoning by carbon monoxide                    | 0 (0 to 0) | 0 (0 to 0) | 28.5% (10.3% to 51.3%)    |
| 26 | Guyana        | Poisoning by other means                        | 0 (0 to 0) | 0 (0 to 0) | -10.2% (-20.2% to 0.2%)   |
| 27 | Guyana        | Pulmonary aspiration and foreign body in airway | 0 (0 to 0) | 0 (0 to 0) | -28.2% (-35.8% to -19%)   |
| 28 | Guyana        | Self-harm by firearm                            | 0 (0 to 0) | 0 (0 to 0) | 24.5% (5.6% to 47.8%)     |
| 29 | Guyana        | Self-harm by other specified means              | 0 (0 to 0) | 0 (0 to 0) | 12% (5.2% to 20.4%)       |
| 30 | Guyana        | Unintentional firearm injuries                  | 0 (0 to 0) | 0 (0 to 0) | 21.2% (11.7% to 30.2%)    |
| 31 | Haiti         | Venomous animal contact                         | 0 (0 to 0) | 0 (0 to 0) | 89.2% (69% to 115.2%)     |
| 32 | Haiti         | Adverse effects of medical treatment            | 0 (0 to 0) | 0 (0 to 0) | 0% (0% to 0%)             |
| 33 | Haiti         | Conflict and terrorism                          | 0 (0 to 0) | 0 (0 to 0) | NA                        |
| 34 | Haiti         | Cyclist road injuries                           | 0 (0 to 0) | 0 (0 to 0) | -4% (-11% to 3.5%)        |
| 35 | Haiti         | Drowning                                        | 0 (0 to 0) | 0 (0 to 0) | -25.3% (-33% to -15.5%)   |
| 36 | Haiti         | Environmental heat and cold exposure            | 0 (0 to 1) | 0 (0 to 1) | -8.5% (-11.7% to -5.1%)   |
| 37 | Haiti         | Executions and police conflict                  | 0 (0 to 0) | 0 (0 to 0) | NA                        |
| 38 | Haiti         | Exposure to forces of nature                    | 0 (0 to 0) | 0 (0 to 0) | NA                        |
| 39 | Haiti         | Falls                                           | 1 (1 to 1) | 1 (1 to 1) | 34.1% (29% to 39.2%)      |
| 40 | Haiti         | Fire, heat, and hot substances                  | 0 (0 to 0) | 0 (0 to 0) | -23.1% (-27.5% to -19.1%) |
| 41 | Haiti         | Foreign body in eyes                            | 0 (0 to 0) | 0 (0 to 0) | 0% (0% to 0%)             |
| 42 | Haiti         | Foreign body in other body part                 | 0 (0 to 0) | 0 (0 to 0) | 1.9% (-1.9% to 7.1%)      |
| 43 | Haiti         | Motor vehicle road injuries                     | 0 (0 to 1) | 0 (0 to 1) | -2.1% (-8.9% to 5.4%)     |
| 44 | Haiti         | Motorcyclist road injuries                      | 0 (0 to 0) | 0 (0 to 0) | 16.8% (9.1% to 27.3%)     |
| 45 |               |                                                 |            |            |                           |
| 46 |               |                                                 |            |            |                           |

|    |          |                                                 |            |            |                           |
|----|----------|-------------------------------------------------|------------|------------|---------------------------|
| 1  |          |                                                 |            |            |                           |
| 2  | Haiti    | Non-venomous animal contact                     | 0 (0 to 0) | 0 (0 to 0) | 6.1% (2% to 11.2%)        |
| 3  | Haiti    | Other exposure to mechanical forces             | 0 (0 to 1) | 0 (0 to 1) | 16.3% (8.4% to 28.6%)     |
| 4  | Haiti    | Other road injuries                             | 0 (0 to 0) | 0 (0 to 0) | 5.3% (-3.5% to 15.2%)     |
| 5  | Haiti    | Other transport injuries                        | 0 (0 to 0) | 0 (0 to 0) | -0.1% (-4.2% to 4.3%)     |
| 6  | Haiti    | Other unintentional injuries                    | 0 (0 to 0) | 0 (0 to 0) | -19.8% (-23.6% to -15.6%) |
| 7  | Haiti    | Pedestrian road injuries                        | 0 (0 to 0) | 0 (0 to 0) | -21.7% (-27.2% to -15.7%) |
| 8  | Haiti    | Physical violence by firearm                    | 0 (0 to 0) | 0 (0 to 0) | 18.8% (8.1% to 32.4%)     |
| 9  | Haiti    | Physical violence by other means                | 0 (0 to 0) | 0 (0 to 0) | -8.3% (-14.5% to -2%)     |
| 10 | Haiti    | Physical violence by sharp object               | 0 (0 to 0) | 0 (0 to 0) | 5.7% (-1.3% to 15%)       |
| 11 | Haiti    | Poisoning by carbon monoxide                    | 0 (0 to 0) | 0 (0 to 0) | 17.1% (2% to 32.5%)       |
| 12 | Haiti    | Poisoning by other means                        | 0 (0 to 0) | 0 (0 to 0) | -21.7% (-28.5% to -15.1%) |
| 13 | Haiti    | Pulmonary aspiration and foreign body in airway | 0 (0 to 0) | 0 (0 to 0) | -34.4% (-41.4% to -26.7%) |
| 14 | Haiti    | Self-harm by firearm                            | 0 (0 to 0) | 0 (0 to 0) | 0.6% (-10.8% to 11.7%)    |
| 15 | Haiti    | Self-harm by other specified means              | 0 (0 to 0) | 0 (0 to 0) | -6.2% (-12.4% to 0.4%)    |
| 16 | Haiti    | Unintentional firearm injuries                  | 0 (0 to 1) | 0 (0 to 1) | -17.2% (-24.8% to -10.9%) |
| 17 | Honduras | Venomous animal contact                         | 0 (0 to 0) | 0 (0 to 0) | 6.4% (1.5% to 11.8%)      |
| 18 | Honduras | Adverse effects of medical treatment            | 0 (0 to 0) | 0 (0 to 0) | 0% (0% to 0%)             |
| 19 | Honduras | Conflict and terrorism                          | 0 (0 to 0) | 0 (0 to 0) | NA                        |
| 20 | Honduras | Cyclist road injuries                           | 0 (0 to 0) | 0 (0 to 0) | -13.7% (-22.4% to -4.8%)  |
| 21 | Honduras | Drowning                                        | 0 (0 to 0) | 0 (0 to 0) | 18.4% (4.5% to 36.8%)     |
| 22 | Honduras | Environmental heat and cold exposure            | 0 (0 to 0) | 0 (0 to 0) | 0.6% (-3.8% to 5.2%)      |
| 23 | Honduras | Executions and police conflict                  | 0 (0 to 0) | 0 (0 to 0) | NA                        |
| 24 | Honduras | Exposure to forces of nature                    | 0 (0 to 0) | 0 (0 to 0) | NA                        |
| 25 | Honduras | Falls                                           | 1 (1 to 2) | 2 (1 to 2) | 13.3% (8.3% to 18.3%)     |
| 26 | Honduras | Fire, heat, and hot substances                  | 0 (0 to 0) | 0 (0 to 0) | 2.9% (-4.6% to 10.4%)     |
| 27 | Honduras | Foreign body in eyes                            | 0 (0 to 0) | 0 (0 to 0) | 0% (0% to 0%)             |
| 28 | Honduras | Foreign body in other body part                 | 0 (0 to 0) | 0 (0 to 0) | 0.8% (-2.8% to 4.8%)      |
| 29 | Honduras | Motor vehicle road injuries                     | 0 (0 to 1) | 0 (0 to 1) | 3.1% (-5.8% to 12.2%)     |
| 30 | Honduras | Motorcyclist road injuries                      | 0 (0 to 0) | 0 (0 to 0) | 10.8% (-1% to 23.1%)      |
| 31 | Honduras | Non-venomous animal contact                     | 0 (0 to 0) | 0 (0 to 0) | -8.1% (-12.7% to -3.9%)   |
| 32 | Honduras | Other exposure to mechanical forces             | 0 (0 to 1) | 0 (0 to 1) | -1.1% (-9.3% to 9.3%)     |
| 33 | Honduras | Other road injuries                             | 0 (0 to 0) | 0 (0 to 0) | -17.4% (-25.5% to -8.4%)  |
| 34 | Honduras | Other transport injuries                        | 0 (0 to 0) | 0 (0 to 0) | -0.6% (-5% to 4.1%)       |
| 35 | Honduras | Other unintentional injuries                    | 0 (0 to 0) | 0 (0 to 0) | -25.8% (-31.2% to -20.1%) |
| 36 | Honduras | Pedestrian road injuries                        | 0 (0 to 0) | 0 (0 to 0) | -28% (-36.2% to -20.3%)   |
| 37 | Honduras | Physical violence by firearm                    | 0 (0 to 0) | 0 (0 to 1) | 134.3% (104.3% to 175.8%) |
| 38 | Honduras | Physical violence by other means                | 0 (0 to 1) | 0 (0 to 1) | 34.2% (20.5% to 47.8%)    |
| 39 | Honduras | Physical violence by sharp object               | 0 (0 to 1) | 1 (0 to 1) | 48.4% (31.5% to 66.4%)    |
| 40 | Honduras | Poisoning by carbon monoxide                    | 0 (0 to 0) | 0 (0 to 0) | 48.5% (28.5% to 69.2%)    |
| 41 | Honduras | Poisoning by other means                        | 0 (0 to 0) | 0 (0 to 0) | -14.5% (-23.6% to -4.4%)  |
| 42 | Honduras | Pulmonary aspiration and foreign body in airway | 0 (0 to 0) | 0 (0 to 0) | -8.9% (-20% to 3.5%)      |
| 43 | Honduras | Self-harm by firearm                            | 0 (0 to 0) | 0 (0 to 0) | -11.1% (-23.9% to 2.4%)   |
| 44 | Honduras | Self-harm by other specified means              | 0 (0 to 0) | 0 (0 to 0) | -11.7% (-20.6% to -2.4%)  |
| 45 |          |                                                 |            |            |                           |
| 46 |          |                                                 |            |            |                           |

|    |          |                                                 |              |             |                           |
|----|----------|-------------------------------------------------|--------------|-------------|---------------------------|
| 1  |          |                                                 |              |             |                           |
| 2  | Honduras | Unintentional firearm injuries                  | 0 (0 to 0)   | 0 (0 to 0)  | -28.4% (-36.4% to -21.7%) |
| 3  | Honduras | Venomous animal contact                         | 0 (0 to 0)   | 0 (0 to 0)  | -12.1% (-16.9% to -7.8%)  |
| 4  | Hungary  | Adverse effects of medical treatment            | 0 (0 to 0)   | 0 (0 to 0)  | 0% (0% to 0%)             |
| 5  | Hungary  | Conflict and terrorism                          | 0 (0 to 0)   | 0 (0 to 0)  | NA                        |
| 6  | Hungary  | Cyclist road injuries                           | 1 (0 to 2)   | 1 (0 to 1)  | -37.5% (-45% to -29.5%)   |
| 7  | Hungary  | Drowning                                        | 0 (0 to 0)   | 0 (0 to 0)  | 73.7% (49.8% to 97.7%)    |
| 8  | Hungary  | Environmental heat and cold exposure            | 0 (0 to 0)   | 0 (0 to 0)  | -16% (-20.4% to -11.4%)   |
| 9  | Hungary  | Executions and police conflict                  | 0 (0 to 0)   | 0 (0 to 0)  | NA                        |
| 10 | Hungary  | Exposure to forces of nature                    | 0 (0 to 0)   | 0 (0 to 0)  | NA                        |
| 11 | Hungary  | Falls                                           | 11 (8 to 15) | 8 (6 to 10) | -30.6% (-35.2% to -24.7%) |
| 12 | Hungary  | Fire, heat, and hot substances                  | 0 (0 to 0)   | 0 (0 to 0)  | -23.8% (-29.9% to -17.4%) |
| 13 | Hungary  | Foreign body in eyes                            | 0 (0 to 0)   | 0 (0 to 0)  | 0% (0% to 0%)             |
| 14 | Hungary  | Foreign body in other body part                 | 0 (0 to 0)   | 0 (0 to 0)  | -0.2% (-3.7% to 3.7%)     |
| 15 | Hungary  | Motor vehicle road injuries                     | 2 (1 to 3)   | 1 (1 to 2)  | -35.9% (-43% to -27.5%)   |
| 16 | Hungary  | Motorcyclist road injuries                      | 0 (0 to 0)   | 0 (0 to 0)  | -30% (-43.3% to -14.4%)   |
| 17 | Hungary  | Non-venomous animal contact                     | 0 (0 to 0)   | 0 (0 to 0)  | -15.2% (-18.2% to -11.7%) |
| 18 | Hungary  | Other exposure to mechanical forces             | 2 (1 to 3)   | 1 (1 to 3)  | -4.9% (-11.4% to 0.3%)    |
| 19 | Hungary  | Other road injuries                             | 0 (0 to 0)   | 0 (0 to 0)  | -10.1% (-20.8% to 1%)     |
| 20 | Hungary  | Other transport injuries                        | 0 (0 to 0)   | 0 (0 to 0)  | -19.4% (-26% to -13.5%)   |
| 21 | Hungary  | Other unintentional injuries                    | 0 (0 to 1)   | 0 (0 to 0)  | -10.3% (-16.9% to -3.8%)  |
| 22 | Hungary  | Pedestrian road injuries                        | 0 (0 to 1)   | 0 (0 to 0)  | -37.9% (-47.4% to -27.5%) |
| 23 | Hungary  | Physical violence by firearm                    | 0 (0 to 0)   | 0 (0 to 0)  | 68.2% (48.8% to 92.4%)    |
| 24 | Hungary  | Physical violence by other means                | 0 (0 to 1)   | 0 (0 to 1)  | -22.6% (-31.8% to -13.7%) |
| 25 | Hungary  | Physical violence by sharp object               | 0 (0 to 0)   | 0 (0 to 0)  | -43.6% (-53.2% to -33.5%) |
| 26 | Hungary  | Poisoning by carbon monoxide                    | 0 (0 to 0)   | 0 (0 to 0)  | 33.3% (22% to 46.7%)      |
| 27 | Hungary  | Poisoning by other means                        | 0 (0 to 0)   | 0 (0 to 0)  | -3.1% (-10.4% to 4.4%)    |
| 28 | Hungary  | Pulmonary aspiration and foreign body in airway | 0 (0 to 0)   | 0 (0 to 0)  | -18.4% (-24.3% to -11.8%) |
| 29 | Hungary  | Self-harm by firearm                            | 0 (0 to 0)   | 0 (0 to 0)  | -10.6% (-23.9% to 10.5%)  |
| 30 | Hungary  | Self-harm by other specified means              | 1 (0 to 1)   | 0 (0 to 1)  | -44.3% (-47.6% to -40.8%) |
| 31 | Hungary  | Unintentional firearm injuries                  | 0 (0 to 0)   | 0 (0 to 0)  | 0.2% (-9% to 9.9%)        |
| 32 | Hungary  | Venomous animal contact                         | 0 (0 to 0)   | 0 (0 to 0)  | -14.4% (-18.9% to -8.9%)  |
| 33 | Iceland  | Adverse effects of medical treatment            | 0 (0 to 0)   | 0 (0 to 0)  | 0% (0% to 0%)             |
| 34 | Iceland  | Conflict and terrorism                          | 0 (0 to 0)   | 0 (0 to 0)  | NA                        |
| 35 | Iceland  | Cyclist road injuries                           | 0 (0 to 0)   | 0 (0 to 0)  | -23.6% (-32.7% to -13.1%) |
| 36 | Iceland  | Drowning                                        | 0 (0 to 0)   | 0 (0 to 0)  | 24.9% (14.5% to 36.1%)    |
| 37 | Iceland  | Environmental heat and cold exposure            | 0 (0 to 0)   | 0 (0 to 0)  | -6.7% (-11.4% to -2.3%)   |
| 38 | Iceland  | Executions and police conflict                  | 0 (0 to 0)   | 0 (0 to 0)  | NA                        |
| 39 | Iceland  | Exposure to forces of nature                    | 0 (0 to 0)   | 0 (0 to 0)  | NA                        |
| 40 | Iceland  | Falls                                           | 5 (4 to 7)   | 6 (4 to 8)  | 10.8% (7% to 15.2%)       |
| 41 | Iceland  | Fire, heat, and hot substances                  | 0 (0 to 0)   | 0 (0 to 0)  | -11.7% (-16.2% to -7.1%)  |
| 42 | Iceland  | Foreign body in eyes                            | 0 (0 to 0)   | 0 (0 to 0)  | 0% (0% to 0%)             |
| 43 | Iceland  | Foreign body in other body part                 | 0 (0 to 0)   | 0 (0 to 0)  | 2.5% (-1% to 6.2%)        |
| 44 | Iceland  | Motor vehicle road injuries                     | 1 (0 to 1)   | 0 (0 to 1)  | -53.1% (-59.1% to -47.3%) |
| 45 |          |                                                 |              |             |                           |
| 46 |          |                                                 |              |             |                           |

|    |         |                                                 |            |            |                           |
|----|---------|-------------------------------------------------|------------|------------|---------------------------|
| 1  |         |                                                 |            |            |                           |
| 2  | Iceland | Motorecyclist road injuries                     | 0 (0 to 0) | 0 (0 to 0) | -6.3% (-20.7% to 8.3%)    |
| 3  | Iceland | Non-venomous animal contact                     | 0 (0 to 0) | 0 (0 to 0) | -9.7% (-13% to -6.1%)     |
| 4  | Iceland | Other exposure to mechanical forces             | 1 (0 to 1) | 0 (0 to 1) | -13.8% (-20.9% to -8%)    |
| 5  | Iceland | Other road injuries                             | 0 (0 to 0) | 0 (0 to 0) | -16.4% (-26.5% to -3.5%)  |
| 6  | Iceland | Other transport injuries                        | 0 (0 to 1) | 0 (0 to 0) | -21.4% (-26.7% to -15.7%) |
| 7  | Iceland | Other unintentional injuries                    | 0 (0 to 0) | 0 (0 to 0) | -10.7% (-15.7% to -6%)    |
| 8  | Iceland | Pedestrian road injuries                        | 0 (0 to 0) | 0 (0 to 0) | -31.5% (-42.4% to -19.1%) |
| 9  | Iceland | Physical violence by firearm                    | 0 (0 to 0) | 0 (0 to 0) | 22% (11.3% to 36.5%)      |
| 10 | Iceland | Physical violence by other means                | 0 (0 to 0) | 0 (0 to 0) | -13.3% (-20.2% to -6.8%)  |
| 11 | Iceland | Physical violence by sharp object               | 0 (0 to 0) | 0 (0 to 0) | -13.1% (-21.8% to -4.4%)  |
| 12 | Iceland | Poisoning by carbon monoxide                    | 0 (0 to 0) | 0 (0 to 0) | 0.7% (-5.8% to 8.1%)      |
| 13 | Iceland | Poisoning by other means                        | 0 (0 to 0) | 0 (0 to 0) | -10% (-15.1% to -5%)      |
| 14 | Iceland | Pulmonary aspiration and foreign body in airway | 0 (0 to 0) | 0 (0 to 0) | -10.2% (-18.1% to -1%)    |
| 15 | Iceland | Self-harm by firearm                            | 0 (0 to 0) | 0 (0 to 0) | -31.7% (-41.3% to -21.2%) |
| 16 | Iceland | Self-harm by other specified means              | 0 (0 to 1) | 0 (0 to 0) | -31.2% (-34.9% to -27%)   |
| 17 | Iceland | Unintentional firearm injuries                  | 0 (0 to 0) | 0 (0 to 0) | 5% (-3.1% to 14.8%)       |
| 18 | Iceland | Venomous animal contact                         | 0 (0 to 0) | 0 (0 to 0) | -9.8% (-15% to -3.8%)     |
| 19 | India   | Adverse effects of medical treatment            | 0 (0 to 0) | 0 (0 to 0) | 0% (0% to 0%)             |
| 20 | India   | Conflict and terrorism                          | 1 (0 to 2) | 0 (0 to 0) | NA                        |
| 21 | India   | Cyclist road injuries                           | 1 (0 to 1) | 1 (0 to 2) | 13.7% (9% to 18.1%)       |
| 22 | India   | Drowning                                        | 0 (0 to 0) | 0 (0 to 0) | -29.2% (-33.2% to -25%)   |
| 23 | India   | Environmental heat and cold exposure            | 0 (0 to 0) | 0 (0 to 0) | -7.2% (-10.6% to -4.1%)   |
| 24 | India   | Executions and police conflict                  | 0 (0 to 0) | 0 (0 to 0) | NA                        |
| 25 | India   | Exposure to forces of nature                    | 0 (0 to 0) | 0 (0 to 0) | NA                        |
| 26 | India   | Falls                                           | 4 (3 to 6) | 5 (3 to 6) | 15.2% (11.9% to 18.2%)    |
| 27 | India   | Fire, heat, and hot substances                  | 0 (0 to 0) | 0 (0 to 0) | -8.5% (-11.4% to -5.9%)   |
| 28 | India   | Foreign body in eyes                            | 0 (0 to 0) | 0 (0 to 0) | 0% (0% to 0%)             |
| 29 | India   | Foreign body in other body part                 | 0 (0 to 0) | 0 (0 to 0) | -3.3% (-4.4% to -2.1%)    |
| 30 | India   | Motor vehicle road injuries                     | 1 (0 to 1) | 1 (0 to 2) | 25.8% (20.9% to 30.4%)    |
| 31 | India   | Motorecyclist road injuries                     | 1 (0 to 1) | 1 (1 to 2) | 56.8% (50.7% to 63.6%)    |
| 32 | India   | Non-venomous animal contact                     | 0 (0 to 1) | 0 (0 to 1) | -31.7% (-34.1% to -27.8%) |
| 33 | India   | Other exposure to mechanical forces             | 0 (0 to 0) | 0 (0 to 0) | -4.4% (-8.1% to -0.3%)    |
| 34 | India   | Other road injuries                             | 0 (0 to 0) | 0 (0 to 0) | 10.9% (6.8% to 15.2%)     |
| 35 | India   | Other transport injuries                        | 0 (0 to 0) | 0 (0 to 0) | 1.9% (0.1% to 3.8%)       |
| 36 | India   | Other unintentional injuries                    | 0 (0 to 0) | 0 (0 to 0) | -19.5% (-21.8% to -17.2%) |
| 37 | India   | Pedestrian road injuries                        | 1 (0 to 1) | 1 (0 to 1) | 13% (7.8% to 18.1%)       |
| 38 | India   | Physical violence by firearm                    | 0 (0 to 0) | 0 (0 to 0) | -6.8% (-13.4% to 1.1%)    |
| 39 | India   | Physical violence by other means                | 0 (0 to 1) | 0 (0 to 1) | -11.3% (-13.1% to -9.6%)  |
| 40 | India   | Physical violence by sharp object               | 0 (0 to 0) | 0 (0 to 0) | -15.5% (-19.4% to -11.5%) |
| 41 | India   | Poisoning by carbon monoxide                    | 0 (0 to 0) | 0 (0 to 0) | 8.1% (-1.4% to 16.7%)     |
| 42 | India   | Poisoning by other means                        | 0 (0 to 0) | 0 (0 to 0) | 1.8% (-6.4% to 9%)        |
| 43 | India   | Pulmonary aspiration and foreign body in airway | 0 (0 to 0) | 0 (0 to 0) | -18.6% (-21.9% to -15.2%) |
| 44 | India   | Self-harm by firearm                            | 0 (0 to 0) | 0 (0 to 0) | -1.3% (-9.5% to 7.8%)     |
| 45 |         |                                                 |            |            |                           |
| 46 |         |                                                 |            |            |                           |

|    |                            |                                                 |               |            |                           |
|----|----------------------------|-------------------------------------------------|---------------|------------|---------------------------|
| 1  |                            |                                                 |               |            |                           |
| 2  | India                      | Self-harm by other specified means              | 0 (0 to 1)    | 0 (0 to 1) | -29.2% (-33.9% to -24.8%) |
| 3  | India                      | Unintentional firearm injuries                  | 0 (0 to 0)    | 0 (0 to 0) | -4.3% (-9% to -0.1%)      |
| 4  | India                      | Venomous animal contact                         | 0 (0 to 0)    | 0 (0 to 0) | -51.2% (-54.7% to -47.8%) |
| 5  | Indonesia                  | Adverse effects of medical treatment            | 0 (0 to 0)    | 0 (0 to 0) | 0% (0% to 0%)             |
| 6  | Indonesia                  | Conflict and terrorism                          | 0 (0 to 0)    | 0 (0 to 0) | NA                        |
| 7  | Indonesia                  | Cyclist road injuries                           | 1 (0 to 1)    | 0 (0 to 1) | -8.1% (-13.7% to -1.7%)   |
| 8  | Indonesia                  | Drowning                                        | 0 (0 to 0)    | 0 (0 to 0) | -3% (-11.7% to 5.8%)      |
| 9  | Indonesia                  | Environmental heat and cold exposure            | 0 (0 to 0)    | 0 (0 to 0) | -10% (-14.6% to -5.4%)    |
| 10 | Indonesia                  | Executions and police conflict                  | 0 (0 to 0)    | 0 (0 to 0) | NA                        |
| 11 | Indonesia                  | Exposure to forces of nature                    | 0 (0 to 0)    | 0 (0 to 0) | NA                        |
| 12 | Indonesia                  | Falls                                           | 6 (4 to 8)    | 5 (3 to 8) | -6.6% (-9.1% to -4.3%)    |
| 13 | Indonesia                  | Fire, heat, and hot substances                  | 0 (0 to 0)    | 0 (0 to 0) | 2.8% (-1.2% to 6.6%)      |
| 14 | Indonesia                  | Foreign body in eyes                            | 0 (0 to 0)    | 0 (0 to 0) | 0% (0% to 0%)             |
| 15 | Indonesia                  | Foreign body in other body part                 | 0 (0 to 1)    | 0 (0 to 1) | -9.6% (-11.1% to -8.1%)   |
| 16 | Indonesia                  | Motor vehicle road injuries                     | 1 (0 to 2)    | 1 (0 to 1) | -30.6% (-35.1% to -26.3%) |
| 17 | Indonesia                  | Motorcyclist road injuries                      | 2 (1 to 3)    | 2 (1 to 3) | 3.4% (-2% to 10.6%)       |
| 18 | Indonesia                  | Non-venomous animal contact                     | 0 (0 to 0)    | 0 (0 to 0) | -32.9% (-37.3% to -29.5%) |
| 19 | Indonesia                  | Other exposure to mechanical forces             | 0 (0 to 1)    | 0 (0 to 0) | -14% (-19.9% to -8.5%)    |
| 20 | Indonesia                  | Other road injuries                             | 0 (0 to 0)    | 0 (0 to 0) | -18% (-27.5% to -8.7%)    |
| 21 | Indonesia                  | Other transport injuries                        | 0 (0 to 1)    | 0 (0 to 0) | -37.4% (-41.6% to -33.4%) |
| 22 | Indonesia                  | Other unintentional injuries                    | 1 (0 to 1)    | 1 (0 to 1) | -10.3% (-17.8% to -3.8%)  |
| 23 | Indonesia                  | Pedestrian road injuries                        | 1 (0 to 2)    | 1 (0 to 1) | -41.6% (-45.6% to -37.7%) |
| 24 | Indonesia                  | Physical violence by firearm                    | 0 (0 to 0)    | 0 (0 to 0) | 39.6% (28.1% to 51.2%)    |
| 25 | Indonesia                  | Physical violence by other means                | 0 (0 to 0)    | 0 (0 to 0) | 3.6% (-1.9% to 9.6%)      |
| 26 | Indonesia                  | Physical violence by sharp object               | 0 (0 to 0)    | 0 (0 to 0) | -5.7% (-12% to 0.4%)      |
| 27 | Indonesia                  | Poisoning by carbon monoxide                    | 0 (0 to 0)    | 0 (0 to 0) | 4.2% (0% to 8.9%)         |
| 28 | Indonesia                  | Poisoning by other means                        | 0 (0 to 0)    | 0 (0 to 0) | -13.5% (-15.7% to -10.8%) |
| 29 | Indonesia                  | Pulmonary aspiration and foreign body in airway | 0 (0 to 0)    | 0 (0 to 0) | -32.3% (-38.1% to -25.9%) |
| 30 | Indonesia                  | Self-harm by firearm                            | 0 (0 to 0)    | 0 (0 to 0) | -22.9% (-31% to -12.6%)   |
| 31 | Indonesia                  | Self-harm by other specified means              | 0 (0 to 0)    | 0 (0 to 0) | -17.7% (-20.8% to -14.1%) |
| 32 | Indonesia                  | Unintentional firearm injuries                  | 0 (0 to 0)    | 0 (0 to 0) | -12.2% (-18.7% to -6%)    |
| 33 | Indonesia                  | Venomous animal contact                         | 0 (0 to 0)    | 0 (0 to 0) | 15.7% (5.1% to 30.1%)     |
| 34 | Iran (Islamic Republic of) | Adverse effects of medical treatment            | 0 (0 to 0)    | 0 (0 to 0) | 0% (0% to 0%)             |
| 35 | Iran (Islamic Republic of) | Conflict and terrorism                          | 1 (0 to 3)    | 0 (0 to 0) | NA                        |
| 36 | Iran (Islamic Republic of) | Cyclist road injuries                           | 0 (0 to 0)    | 0 (0 to 0) | -10.7% (-15.4% to -6.4%)  |
| 37 | Iran (Islamic Republic of) | Drowning                                        | 0 (0 to 0)    | 0 (0 to 0) | -54.7% (-59.5% to -49.6%) |
| 38 | Iran (Islamic Republic of) | Environmental heat and cold exposure            | 0 (0 to 0)    | 0 (0 to 0) | 7.3% (5.7% to 9.1%)       |
| 39 | Iran (Islamic Republic of) | Executions and police conflict                  | 0 (0 to 1)    | 0 (0 to 0) | NA                        |
| 40 | Iran (Islamic Republic of) | Exposure to forces of nature                    | 44 (20 to 89) | 0 (0 to 0) | NA                        |
| 41 | Iran (Islamic Republic of) | Falls                                           | 2 (2 to 3)    | 2 (1 to 3) | -0.1% (-3.6% to 3.4%)     |
| 42 | Iran (Islamic Republic of) | Fire, heat, and hot substances                  | 0 (0 to 0)    | 0 (0 to 0) | -30.3% (-33.9% to -26.7%) |
| 43 | Iran (Islamic Republic of) | Foreign body in eyes                            | 0 (0 to 0)    | 0 (0 to 0) | 0% (0% to 0%)             |
| 44 | Iran (Islamic Republic of) | Foreign body in other body part                 | 0 (0 to 0)    | 0 (0 to 0) | 0.4% (-0.4% to 1.3%)      |
| 45 |                            |                                                 |               |            |                           |
| 46 |                            |                                                 |               |            |                           |

|    |                            |                                                 |             |            |                           |
|----|----------------------------|-------------------------------------------------|-------------|------------|---------------------------|
| 1  |                            |                                                 |             |            |                           |
| 2  | Iran (Islamic Republic of) | Motor vehicle road injuries                     | 1 (0 to 1)  | 1 (0 to 1) | -33.3% (-35.9% to -30.9%) |
| 3  | Iran (Islamic Republic of) | Motorcyclist road injuries                      | 0 (0 to 1)  | 0 (0 to 0) | -36.8% (-40.1% to -33.4%) |
| 4  | Iran (Islamic Republic of) | Non-venomous animal contact                     | 0 (0 to 0)  | 0 (0 to 0) | -8.8% (-11.2% to -6.4%)   |
| 5  | Iran (Islamic Republic of) | Other exposure to mechanical forces             | 0 (0 to 1)  | 0 (0 to 1) | -13.5% (-15.5% to -11.8%) |
| 6  | Iran (Islamic Republic of) | Other road injuries                             | 0 (0 to 0)  | 0 (0 to 0) | 7.3% (2% to 12.5%)        |
| 7  | Iran (Islamic Republic of) | Other transport injuries                        | 0 (0 to 0)  | 0 (0 to 0) | 3.4% (1.6% to 5.1%)       |
| 8  | Iran (Islamic Republic of) | Other unintentional injuries                    | 0 (0 to 0)  | 0 (0 to 0) | -14.6% (-17.5% to -11.6%) |
| 9  | Iran (Islamic Republic of) | Pedestrian road injuries                        | 0 (0 to 1)  | 0 (0 to 0) | -28.2% (-32% to -24.8%)   |
| 10 | Iran (Islamic Republic of) | Physical violence by firearm                    | 0 (0 to 0)  | 0 (0 to 0) | 45.5% (36.1% to 57.1%)    |
| 11 | Iran (Islamic Republic of) | Physical violence by other means                | 0 (0 to 0)  | 0 (0 to 0) | -2% (-7.1% to 1.8%)       |
| 12 | Iran (Islamic Republic of) | Physical violence by sharp object               | 0 (0 to 0)  | 0 (0 to 0) | 17.4% (11% to 23.9%)      |
| 13 | Iran (Islamic Republic of) | Poisoning by carbon monoxide                    | 0 (0 to 0)  | 0 (0 to 0) | -37.4% (-45.7% to -28.7%) |
| 14 | Iran (Islamic Republic of) | Poisoning by other means                        | 0 (0 to 0)  | 0 (0 to 0) | -35.9% (-41.7% to -30.3%) |
| 15 | Iran (Islamic Republic of) | Pulmonary aspiration and foreign body in airway | 0 (0 to 0)  | 0 (0 to 0) | -23% (-28.7% to -17.5%)   |
| 16 | Iran (Islamic Republic of) | Self-harm by firearm                            | 0 (0 to 0)  | 0 (0 to 0) | 7% (2.1% to 13.2%)        |
| 17 | Iran (Islamic Republic of) | Self-harm by other specified means              | 0 (0 to 0)  | 0 (0 to 0) | -24.3% (-28.1% to -19.6%) |
| 18 | Iran (Islamic Republic of) | Unintentional firearm injuries                  | 0 (0 to 0)  | 0 (0 to 0) | -12.6% (-15.1% to -10.1%) |
| 19 | Iraq                       | Venomous animal contact                         | 0 (0 to 0)  | 0 (0 to 0) | -17.8% (-22.6% to -14.6%) |
| 20 | Iraq                       | Adverse effects of medical treatment            | 0 (0 to 0)  | 0 (0 to 0) | 0% (0% to 0%)             |
| 21 | Iraq                       | Conflict and terrorism                          | 5 (1 to 14) | 2 (0 to 6) | NA                        |
| 22 | Iraq                       | Cyclist road injuries                           | 0 (0 to 0)  | 0 (0 to 0) | -5.8% (-13.4% to 2.6%)    |
| 23 | Iraq                       | Drowning                                        | 0 (0 to 0)  | 0 (0 to 0) | 42.8% (23.5% to 62.9%)    |
| 24 | Iraq                       | Environmental heat and cold exposure            | 0 (0 to 0)  | 0 (0 to 0) | 2.2% (-3.4% to 8.1%)      |
| 25 | Iraq                       | Executions and police conflict                  | 0 (0 to 0)  | 0 (0 to 0) | NA                        |
| 26 | Iraq                       | Exposure to forces of nature                    | 0 (0 to 0)  | 0 (0 to 0) | NA                        |
| 27 | Iraq                       | Falls                                           | 2 (1 to 2)  | 2 (1 to 2) | 7.2% (1.9% to 12.3%)      |
| 28 | Iraq                       | Fire, heat, and hot substances                  | 0 (0 to 0)  | 0 (0 to 0) | -25.6% (-30.8% to -20%)   |
| 29 | Iraq                       | Foreign body in eyes                            | 0 (0 to 0)  | 0 (0 to 0) | 0% (0% to 0%)             |
| 30 | Iraq                       | Foreign body in other body part                 | 0 (0 to 0)  | 0 (0 to 0) | 4.1% (0.5% to 7.7%)       |
| 31 | Iraq                       | Motor vehicle road injuries                     | 1 (0 to 1)  | 0 (0 to 1) | -17.1% (-22.8% to -10.7%) |
| 32 | Iraq                       | Motorcyclist road injuries                      | 0 (0 to 0)  | 0 (0 to 0) | -15.6% (-23.7% to -6.2%)  |
| 33 | Iraq                       | Non-venomous animal contact                     | 0 (0 to 0)  | 0 (0 to 0) | -12.1% (-19.3% to -6.1%)  |
| 34 | Iraq                       | Other exposure to mechanical forces             | 1 (0 to 1)  | 1 (0 to 1) | -20.9% (-27.3% to -13.9%) |
| 35 | Iraq                       | Other road injuries                             | 0 (0 to 0)  | 0 (0 to 0) | -3.8% (-13.2% to 6.3%)    |
| 36 | Iraq                       | Other transport injuries                        | 0 (0 to 0)  | 0 (0 to 0) | 4.3% (0.1% to 9%)         |
| 37 | Iraq                       | Other unintentional injuries                    | 0 (0 to 1)  | 0 (0 to 0) | -28.2% (-32.8% to -23%)   |
| 38 | Iraq                       | Pedestrian road injuries                        | 0 (0 to 0)  | 0 (0 to 0) | -33% (-39.1% to -26.5%)   |
| 39 | Iraq                       | Physical violence by firearm                    | 0 (0 to 0)  | 0 (0 to 0) | 170.6% (132.9% to 220.3%) |
| 40 | Iraq                       | Physical violence by other means                | 0 (0 to 1)  | 0 (0 to 1) | 17.9% (3.8% to 31.6%)     |
| 41 | Iraq                       | Physical violence by sharp object               | 0 (0 to 0)  | 0 (0 to 0) | 3.5% (-11.2% to 20.4%)    |
| 42 | Iraq                       | Poisoning by carbon monoxide                    | 0 (0 to 0)  | 0 (0 to 0) | 49.5% (34.4% to 66.8%)    |
| 43 | Iraq                       | Poisoning by other means                        | 0 (0 to 0)  | 0 (0 to 0) | -4.7% (-11.9% to 3.5%)    |
| 44 | Iraq                       | Pulmonary aspiration and foreign body in airway | 0 (0 to 0)  | 0 (0 to 0) | -20.5% (-28.7% to -12.3%) |
| 45 |                            |                                                 |             |            |                           |
| 46 |                            |                                                 |             |            |                           |

|    |         |                                                 |            |            |                           |
|----|---------|-------------------------------------------------|------------|------------|---------------------------|
| 1  |         |                                                 |            |            |                           |
| 2  | Iraq    | Self-harm by firearm                            | 0 (0 to 0) | 0 (0 to 0) | 9.8% (-1.6% to 23.6%)     |
| 3  | Iraq    | Self-harm by other specified means              | 0 (0 to 0) | 0 (0 to 0) | 15.7% (9.4% to 23.4%)     |
| 4  | Iraq    | Unintentional firearm injuries                  | 0 (0 to 1) | 0 (0 to 0) | -7.9% (-16.7% to 2.5%)    |
| 5  | Iraq    | Venomous animal contact                         | 0 (0 to 0) | 0 (0 to 0) | 14.4% (5.6% to 25.6%)     |
| 6  | Ireland | Adverse effects of medical treatment            | 0 (0 to 0) | 0 (0 to 0) | 0% (0% to 0%)             |
| 7  | Ireland | Conflict and terrorism                          | 0 (0 to 0) | 0 (0 to 0) | NA                        |
| 8  | Ireland | Cyclist road injuries                           | 0 (0 to 0) | 0 (0 to 0) | -39.3% (-49.1% to -28.4%) |
| 9  | Ireland | Drowning                                        | 0 (0 to 0) | 0 (0 to 0) | 57.1% (42.7% to 71.7%)    |
| 10 | Ireland | Environmental heat and cold exposure            | 0 (0 to 0) | 0 (0 to 0) | -11% (-16.8% to -5%)      |
| 11 | Ireland | Executions and police conflict                  | 0 (0 to 0) | 0 (0 to 0) | NA                        |
| 12 | Ireland | Exposure to forces of nature                    | 0 (0 to 0) | 0 (0 to 0) | NA                        |
| 13 | Ireland | Falls                                           | 5 (4 to 7) | 6 (4 to 8) | 12.7% (7.7% to 17.4%)     |
| 14 | Ireland | Fire, heat, and hot substances                  | 0 (0 to 0) | 0 (0 to 0) | -26.8% (-33.1% to -20.3%) |
| 15 | Ireland | Foreign body in eyes                            | 0 (0 to 0) | 0 (0 to 0) | 0% (0% to 0%)             |
| 16 | Ireland | Foreign body in other body part                 | 0 (0 to 0) | 0 (0 to 0) | 1.9% (-1.5% to 5.3%)      |
| 17 | Ireland | Motor vehicle road injuries                     | 1 (0 to 1) | 0 (0 to 0) | -49.2% (-57.5% to -40.5%) |
| 18 | Ireland | Motorcyclist road injuries                      | 0 (0 to 0) | 0 (0 to 0) | -37.6% (-51.6% to -21.6%) |
| 19 | Ireland | Non-venomous animal contact                     | 0 (0 to 0) | 0 (0 to 0) | -26.5% (-30.2% to -23.2%) |
| 20 | Ireland | Other exposure to mechanical forces             | 1 (0 to 1) | 0 (0 to 1) | -20.7% (-28.9% to -13.9%) |
| 21 | Ireland | Other road injuries                             | 0 (0 to 0) | 0 (0 to 0) | -11.8% (-25.5% to 4.1%)   |
| 22 | Ireland | Other transport injuries                        | 0 (0 to 0) | 0 (0 to 0) | -4.4% (-10% to 2.1%)      |
| 23 | Ireland | Other unintentional injuries                    | 0 (0 to 0) | 0 (0 to 0) | -8.2% (-14.7% to -2.8%)   |
| 24 | Ireland | Pedestrian road injuries                        | 0 (0 to 0) | 0 (0 to 0) | -44.3% (-55.7% to -31.4%) |
| 25 | Ireland | Physical violence by firearm                    | 0 (0 to 0) | 0 (0 to 0) | 40.1% (27.5% to 56.8%)    |
| 26 | Ireland | Physical violence by other means                | 0 (0 to 0) | 0 (0 to 0) | -3.7% (-12.1% to 4.5%)    |
| 27 | Ireland | Physical violence by sharp object               | 0 (0 to 0) | 0 (0 to 0) | -14.2% (-24% to -5.3%)    |
| 28 | Ireland | Poisoning by carbon monoxide                    | 0 (0 to 0) | 0 (0 to 0) | 18.9% (8.7% to 28.7%)     |
| 29 | Ireland | Poisoning by other means                        | 0 (0 to 0) | 0 (0 to 0) | -4.8% (-10.4% to 1%)      |
| 30 | Ireland | Pulmonary aspiration and foreign body in airway | 0 (0 to 0) | 0 (0 to 0) | -14.1% (-22.3% to -5%)    |
| 31 | Ireland | Self-harm by firearm                            | 0 (0 to 0) | 0 (0 to 0) | -0.8% (-18.4% to 16.2%)   |
| 32 | Ireland | Self-harm by other specified means              | 0 (0 to 1) | 0 (0 to 0) | -9.5% (-14.6% to -3.8%)   |
| 33 | Ireland | Unintentional firearm injuries                  | 0 (0 to 0) | 0 (0 to 0) | -0.1% (-11.9% to 10.1%)   |
| 34 | Ireland | Venomous animal contact                         | 0 (0 to 0) | 0 (0 to 0) | -21.8% (-26.8% to -16.6%) |
| 35 | Israel  | Adverse effects of medical treatment            | 0 (0 to 0) | 0 (0 to 0) | 0% (0% to 0%)             |
| 36 | Israel  | Conflict and terrorism                          | 1 (0 to 3) | 0 (0 to 0) | NA                        |
| 37 | Israel  | Cyclist road injuries                           | 0 (0 to 0) | 0 (0 to 0) | -9.7% (-19.5% to 1%)      |
| 38 | Israel  | Drowning                                        | 0 (0 to 0) | 0 (0 to 0) | 52.6% (36% to 71.1%)      |
| 39 | Israel  | Environmental heat and cold exposure            | 0 (0 to 0) | 0 (0 to 0) | -5.4% (-10.5% to -0.5%)   |
| 40 | Israel  | Executions and police conflict                  | 0 (0 to 0) | 0 (0 to 0) | NA                        |
| 41 | Israel  | Exposure to forces of nature                    | 0 (0 to 0) | 0 (0 to 0) | NA                        |
| 42 | Israel  | Falls                                           | 4 (3 to 5) | 4 (3 to 6) | 18% (13.3% to 22.6%)      |
| 43 | Israel  | Fire, heat, and hot substances                  | 0 (0 to 0) | 0 (0 to 0) | -11% (-16.1% to -6.8%)    |
| 44 | Israel  | Foreign body in eyes                            | 0 (0 to 0) | 0 (0 to 0) | 0% (0% to 0%)             |
| 45 |         |                                                 |            |            |                           |
| 46 |         |                                                 |            |            |                           |

|    |        |                                                 |            |            |                           |
|----|--------|-------------------------------------------------|------------|------------|---------------------------|
| 1  |        |                                                 |            |            |                           |
| 2  | Israel | Foreign body in other body part                 | 0 (0 to 0) | 0 (0 to 0) | -6% (-9.3% to -2.4%)      |
| 3  | Israel | Motor vehicle road injuries                     | 1 (0 to 1) | 0 (0 to 1) | -39.4% (-46.5% to -32.2%) |
| 4  | Israel | Motorcyclist road injuries                      | 0 (0 to 0) | 0 (0 to 0) | 24.9% (7.5% to 46.8%)     |
| 5  | Israel | Non-venomous animal contact                     | 0 (0 to 0) | 0 (0 to 0) | -13% (-16.4% to -9.3%)    |
| 6  | Israel | Other exposure to mechanical forces             | 1 (0 to 1) | 0 (0 to 1) | -12.1% (-19.7% to -4.7%)  |
| 7  | Israel | Other road injuries                             | 0 (0 to 0) | 0 (0 to 0) | -13.6% (-24.2% to -2.2%)  |
| 8  | Israel | Other transport injuries                        | 0 (0 to 0) | 0 (0 to 0) | -1.2% (-4.5% to 1.9%)     |
| 9  | Israel | Other unintentional injuries                    | 0 (0 to 0) | 0 (0 to 0) | -20.1% (-24.9% to -14.8%) |
| 10 | Israel | Pedestrian road injuries                        | 0 (0 to 0) | 0 (0 to 0) | -35.1% (-43.3% to -26.7%) |
| 11 | Israel | Physical violence by firearm                    | 0 (0 to 0) | 0 (0 to 0) | 72.7% (51.1% to 102.2%)   |
| 12 | Israel | Physical violence by other means                | 0 (0 to 0) | 0 (0 to 0) | -18.3% (-28.6% to -9%)    |
| 13 | Israel | Physical violence by sharp object               | 0 (0 to 0) | 0 (0 to 0) | 0.2% (-14.1% to 15.4%)    |
| 14 | Israel | Poisoning by carbon monoxide                    | 0 (0 to 0) | 0 (0 to 0) | 7.9% (-1.9% to 17.6%)     |
| 15 | Israel | Poisoning by other means                        | 0 (0 to 0) | 0 (0 to 0) | -8.4% (-14.9% to -2.2%)   |
| 16 | Israel | Pulmonary aspiration and foreign body in airway | 0 (0 to 0) | 0 (0 to 0) | -25.3% (-31.6% to -18%)   |
| 17 | Israel | Self-harm by firearm                            | 0 (0 to 0) | 0 (0 to 0) | -26.1% (-37.9% to -15.8%) |
| 18 | Israel | Self-harm by other specified means              | 0 (0 to 0) | 0 (0 to 0) | -21.4% (-26.1% to -16.4%) |
| 19 | Israel | Unintentional firearm injuries                  | 0 (0 to 0) | 0 (0 to 0) | -33.5% (-43.7% to -25.2%) |
| 20 | Israel | Venomous animal contact                         | 0 (0 to 0) | 0 (0 to 0) | -15.4% (-20.9% to -9.8%)  |
| 21 | Italy  | Adverse effects of medical treatment            | 0 (0 to 0) | 0 (0 to 0) | 0% (0% to 0%)             |
| 22 | Italy  | Conflict and terrorism                          | 0 (0 to 0) | 0 (0 to 0) | NA                        |
| 23 | Italy  | Cyclist road injuries                           | 0 (0 to 0) | 0 (0 to 0) | -30.3% (-35.6% to -23.7%) |
| 24 | Italy  | Drowning                                        | 0 (0 to 0) | 0 (0 to 0) | 4.1% (0.2% to 7%)         |
| 25 | Italy  | Environmental heat and cold exposure            | 0 (0 to 0) | 0 (0 to 0) | -37.2% (-42.3% to -31.1%) |
| 26 | Italy  | Executions and police conflict                  | 0 (0 to 0) | 0 (0 to 0) | NA                        |
| 27 | Italy  | Exposure to forces of nature                    | 0 (0 to 0) | 0 (0 to 0) | NA                        |
| 28 | Italy  | Falls                                           | 7 (5 to 9) | 5 (4 to 7) | -20% (-24.4% to -15.9%)   |
| 29 | Italy  | Fire, heat, and hot substances                  | 0 (0 to 0) | 0 (0 to 0) | -38.9% (-44.4% to -31.7%) |
| 30 | Italy  | Foreign body in eyes                            | 0 (0 to 0) | 0 (0 to 0) | 0% (0% to 0%)             |
| 31 | Italy  | Foreign body in other body part                 | 0 (0 to 1) | 0 (0 to 0) | -23% (-30.2% to -13.8%)   |
| 32 | Italy  | Motor vehicle road injuries                     | 1 (0 to 1) | 0 (0 to 1) | -28.3% (-32.5% to -23.5%) |
| 33 | Italy  | Motorcyclist road injuries                      | 0 (0 to 0) | 0 (0 to 0) | 0.9% (-7.8% to 11.2%)     |
| 34 | Italy  | Non-venomous animal contact                     | 0 (0 to 0) | 0 (0 to 0) | -68.1% (-72.3% to -61.9%) |
| 35 | Italy  | Other exposure to mechanical forces             | 1 (0 to 1) | 0 (0 to 1) | -34.7% (-38.5% to -30.1%) |
| 36 | Italy  | Other road injuries                             | 0 (0 to 0) | 0 (0 to 0) | 7.5% (-0.7% to 17.4%)     |
| 37 | Italy  | Other transport injuries                        | 0 (0 to 0) | 0 (0 to 0) | 7.9% (5.2% to 11.4%)      |
| 38 | Italy  | Other unintentional injuries                    | 0 (0 to 0) | 0 (0 to 0) | -43.7% (-47.1% to -39.7%) |
| 39 | Italy  | Pedestrian road injuries                        | 0 (0 to 0) | 0 (0 to 0) | -29.3% (-34.4% to -23%)   |
| 40 | Italy  | Physical violence by firearm                    | 0 (0 to 0) | 0 (0 to 0) | -40.6% (-45.7% to -35.3%) |
| 41 | Italy  | Physical violence by other means                | 0 (0 to 0) | 0 (0 to 0) | -46.1% (-50.2% to -40.7%) |
| 42 | Italy  | Physical violence by sharp object               | 0 (0 to 0) | 0 (0 to 0) | -46.5% (-51.9% to -39.8%) |
| 43 | Italy  | Poisoning by carbon monoxide                    | 0 (0 to 0) | 0 (0 to 0) | -26.5% (-39% to -6.7%)    |
| 44 | Italy  | Poisoning by other means                        | 0 (0 to 0) | 0 (0 to 0) | -46.9% (-51.3% to -41.5%) |
| 45 |        |                                                 |            |            |                           |
| 46 |        |                                                 |            |            |                           |



|    |         |                                                 |             |             |                           |
|----|---------|-------------------------------------------------|-------------|-------------|---------------------------|
| 1  |         |                                                 |             |             |                           |
| 2  | Italy   | Pulmonary aspiration and foreign body in airway | 0 (0 to 0)  | 0 (0 to 0)  | -9.7% (-16.1% to -3.5%)   |
| 3  | Italy   | Self-harm by firearm                            | 0 (0 to 0)  | 0 (0 to 0)  | -1.2% (-11.9% to 14.5%)   |
| 4  | Italy   | Self-harm by other specified means              | 0 (0 to 0)  | 0 (0 to 0)  | -39.9% (-44.2% to -35.9%) |
| 5  | Italy   | Unintentional firearm injuries                  | 0 (0 to 0)  | 0 (0 to 0)  | -47% (-51.9% to -40%)     |
| 6  | Italy   | Venomous animal contact                         | 0 (0 to 0)  | 0 (0 to 0)  | -72.2% (-76.9% to -65%)   |
| 7  | Jamaica | Adverse effects of medical treatment            | 0 (0 to 0)  | 0 (0 to 0)  | 0% (0% to 0%)             |
| 8  | Jamaica | Conflict and terrorism                          | 1 (0 to 2)  | 0 (0 to 0)  | NA                        |
| 9  | Jamaica | Cyclist road injuries                           | 0 (0 to 0)  | 0 (0 to 0)  | -6.6% (-15.1% to 1.8%)    |
| 10 | Jamaica | Drowning                                        | 0 (0 to 0)  | 0 (0 to 0)  | 56.1% (35% to 79.6%)      |
| 11 | Jamaica | Environmental heat and cold exposure            | 0 (0 to 0)  | 0 (0 to 1)  | 6.5% (2.6% to 10.5%)      |
| 12 | Jamaica | Executions and police conflict                  | 0 (0 to 0)  | 0 (0 to 0)  | NA                        |
| 13 | Jamaica | Exposure to forces of nature                    | 0 (0 to 0)  | 0 (0 to 0)  | NA                        |
| 14 | Jamaica | Falls                                           | 1 (1 to 1)  | 1 (1 to 2)  | 45.5% (39.9% to 51.9%)    |
| 15 | Jamaica | Fire, heat, and hot substances                  | 0 (0 to 0)  | 0 (0 to 0)  | -1.6% (-6.3% to 4.8%)     |
| 16 | Jamaica | Foreign body in eyes                            | 0 (0 to 0)  | 0 (0 to 0)  | 0% (0% to 0%)             |
| 17 | Jamaica | Foreign body in other body part                 | 0 (0 to 0)  | 0 (0 to 0)  | -33.8% (-40.2% to -27.9%) |
| 18 | Jamaica | Motor vehicle road injuries                     | 0 (0 to 0)  | 0 (0 to 0)  | 20.7% (9.7% to 33.3%)     |
| 19 | Jamaica | Motorcyclist road injuries                      | 0 (0 to 0)  | 0 (0 to 0)  | -2.3% (-12.3% to 8.2%)    |
| 20 | Jamaica | Non-venomous animal contact                     | 0 (0 to 0)  | 0 (0 to 0)  | -21.4% (-25% to -18%)     |
| 21 | Jamaica | Other exposure to mechanical forces             | 0 (0 to 1)  | 0 (0 to 1)  | 10.2% (0.8% to 20.7%)     |
| 22 | Jamaica | Other road injuries                             | 0 (0 to 0)  | 0 (0 to 0)  | -10.7% (-19.3% to -1.3%)  |
| 23 | Jamaica | Other transport injuries                        | 0 (0 to 0)  | 0 (0 to 0)  | -12.9% (-16.7% to -8.4%)  |
| 24 | Jamaica | Other unintentional injuries                    | 0 (0 to 0)  | 0 (0 to 0)  | -9% (-14.2% to -4.3%)     |
| 25 | Jamaica | Pedestrian road injuries                        | 0 (0 to 0)  | 0 (0 to 0)  | 5.2% (-4.1% to 14.2%)     |
| 26 | Jamaica | Physical violence by firearm                    | 0 (0 to 0)  | 0 (0 to 0)  | 24.6% (11% to 41.3%)      |
| 27 | Jamaica | Physical violence by other means                | 0 (0 to 0)  | 0 (0 to 0)  | 2.5% (-6.7% to 12.6%)     |
| 28 | Jamaica | Physical violence by sharp object               | 0 (0 to 0)  | 0 (0 to 0)  | -13.1% (-22.6% to -3.9%)  |
| 29 | Jamaica | Poisoning by carbon monoxide                    | 0 (0 to 0)  | 0 (0 to 0)  | 6.4% (-4.9% to 18%)       |
| 30 | Jamaica | Poisoning by other means                        | 0 (0 to 0)  | 0 (0 to 0)  | -1.9% (-8.3% to 4.8%)     |
| 31 | Jamaica | Pulmonary aspiration and foreign body in airway | 0 (0 to 0)  | 0 (0 to 0)  | 5.4% (-5.8% to 18.7%)     |
| 32 | Jamaica | Self-harm by firearm                            | 0 (0 to 0)  | 0 (0 to 0)  | 24.5% (11.7% to 44.1%)    |
| 33 | Jamaica | Self-harm by other specified means              | 0 (0 to 0)  | 0 (0 to 0)  | 8.1% (0.3% to 16.2%)      |
| 34 | Jamaica | Unintentional firearm injuries                  | 1 (0 to 1)  | 0 (0 to 1)  | -16.4% (-25.9% to -7.5%)  |
| 35 | Jamaica | Venomous animal contact                         | 0 (0 to 0)  | 0 (0 to 0)  | -18.8% (-22.5% to -14.4%) |
| 36 | Japan   | Adverse effects of medical treatment            | 0 (0 to 0)  | 0 (0 to 0)  | 0% (0% to 0%)             |
| 37 | Japan   | Conflict and terrorism                          | 0 (0 to 0)  | 0 (0 to 0)  | NA                        |
| 38 | Japan   | Cyclist road injuries                           | 1 (0 to 1)  | 0 (0 to 1)  | -39.3% (-43.1% to -35.5%) |
| 39 | Japan   | Drowning                                        | 0 (0 to 0)  | 0 (0 to 0)  | 35% (29.8% to 41.2%)      |
| 40 | Japan   | Environmental heat and cold exposure            | 0 (0 to 0)  | 0 (0 to 0)  | 13.4% (9.9% to 17.1%)     |
| 41 | Japan   | Executions and police conflict                  | 0 (0 to 0)  | 0 (0 to 0)  | NA                        |
| 42 | Japan   | Exposure to forces of nature                    | 0 (0 to 0)  | 0 (0 to 0)  | NA                        |
| 43 | Japan   | Falls                                           | 8 (5 to 11) | 8 (5 to 11) | 1.3% (-0.7% to 3.2%)      |
| 44 | Japan   | Fire, heat, and hot substances                  | 0 (0 to 0)  | 0 (0 to 0)  | -10.7% (-14.4% to -7.2%)  |
| 45 |         |                                                 |             |             |                           |
| 46 |         |                                                 |             |             |                           |

|    |        |                                                 |            |            |                           |
|----|--------|-------------------------------------------------|------------|------------|---------------------------|
| 1  |        |                                                 |            |            |                           |
| 2  | Japan  | Foreign body in eyes                            | 0 (0 to 0) | 0 (0 to 0) | 0% (0% to 0%)             |
| 3  | Japan  | Foreign body in other body part                 | 1 (0 to 1) | 1 (0 to 1) | -3% (-4.2% to -2%)        |
| 4  | Japan  | Motor vehicle road injuries                     | 1 (0 to 1) | 0 (0 to 1) | -46.9% (-50.3% to -44.1%) |
| 5  | Japan  | Motorcyclist road injuries                      | 0 (0 to 1) | 0 (0 to 0) | -46.1% (-50.4% to -42%)   |
| 6  | Japan  | Non-venomous animal contact                     | 0 (0 to 1) | 0 (0 to 0) | -14.9% (-16.4% to -13.3%) |
| 7  | Japan  | Other exposure to mechanical forces             | 1 (0 to 2) | 1 (0 to 2) | -12.4% (-16.3% to -9.5%)  |
| 8  | Japan  | Other road injuries                             | 0 (0 to 0) | 0 (0 to 0) | -21.9% (-26.1% to -17.2%) |
| 9  | Japan  | Other transport injuries                        | 0 (0 to 1) | 0 (0 to 1) | -10.4% (-13.3% to -7.6%)  |
| 10 | Japan  | Other unintentional injuries                    | 1 (1 to 2) | 1 (1 to 1) | -9.6% (-12% to -7.4%)     |
| 11 | Japan  | Pedestrian road injuries                        | 0 (0 to 1) | 0 (0 to 0) | -38.1% (-43.6% to -32.5%) |
| 12 | Japan  | Physical violence by firearm                    | 0 (0 to 0) | 0 (0 to 0) | 37.2% (29.5% to 46.8%)    |
| 13 | Japan  | Physical violence by other means                | 0 (0 to 0) | 0 (0 to 0) | 0% (-4.5% to 4.3%)        |
| 14 | Japan  | Physical violence by sharp object               | 0 (0 to 0) | 0 (0 to 0) | -0.5% (-6.9% to 5.1%)     |
| 15 | Japan  | Poisoning by carbon monoxide                    | 0 (0 to 0) | 0 (0 to 0) | 7.3% (3.9% to 10.9%)      |
| 16 | Japan  | Poisoning by other means                        | 0 (0 to 0) | 0 (0 to 0) | -9.2% (-11.7% to -6.9%)   |
| 17 | Japan  | Pulmonary aspiration and foreign body in airway | 0 (0 to 0) | 0 (0 to 0) | -14.1% (-16.3% to -11.8%) |
| 18 | Japan  | Self-harm by firearm                            | 0 (0 to 0) | 0 (0 to 0) | 32.8% (25.4% to 42.8%)    |
| 19 | Japan  | Self-harm by other specified means              | 0 (0 to 1) | 0 (0 to 1) | 7% (2.9% to 11.6%)        |
| 20 | Japan  | Unintentional firearm injuries                  | 0 (0 to 0) | 0 (0 to 0) | -3% (-7.2% to 1.8%)       |
| 21 | Japan  | Venomous animal contact                         | 0 (0 to 0) | 0 (0 to 0) | -14.9% (-17.4% to -12.3%) |
| 22 | Jordan | Adverse effects of medical treatment            | 0 (0 to 0) | 0 (0 to 0) | 0% (0% to 0%)             |
| 23 | Jordan | Conflict and terrorism                          | 0 (0 to 0) | 0 (0 to 0) | NA                        |
| 24 | Jordan | Cyclist road injuries                           | 0 (0 to 0) | 0 (0 to 0) | -3.3% (-11.6% to 7.2%)    |
| 25 | Jordan | Drowning                                        | 0 (0 to 0) | 0 (0 to 0) | 117% (85.9% to 149.3%)    |
| 26 | Jordan | Environmental heat and cold exposure            | 0 (0 to 0) | 0 (0 to 0) | -0.3% (-6% to 4.7%)       |
| 27 | Jordan | Executions and police conflict                  | 0 (0 to 0) | 0 (0 to 0) | NA                        |
| 28 | Jordan | Exposure to forces of nature                    | 0 (0 to 0) | 0 (0 to 0) | NA                        |
| 29 | Jordan | Falls                                           | 1 (1 to 2) | 2 (1 to 2) | 23.5% (17.5% to 30%)      |
| 30 | Jordan | Fire, heat, and hot substances                  | 0 (0 to 0) | 0 (0 to 0) | -35% (-40.9% to -29.2%)   |
| 31 | Jordan | Foreign body in eyes                            | 0 (0 to 0) | 0 (0 to 0) | 0% (0% to 0%)             |
| 32 | Jordan | Foreign body in other body part                 | 0 (0 to 0) | 0 (0 to 0) | 1.9% (-2.7% to 6.2%)      |
| 33 | Jordan | Motor vehicle road injuries                     | 1 (0 to 1) | 0 (0 to 1) | -30.5% (-36.1% to -24.2%) |
| 34 | Jordan | Motorcyclist road injuries                      | 0 (0 to 0) | 0 (0 to 0) | -29.3% (-37.4% to -20.3%) |
| 35 | Jordan | Non-venomous animal contact                     | 0 (0 to 0) | 0 (0 to 0) | 2.8% (-1.3% to 8%)        |
| 36 | Jordan | Other exposure to mechanical forces             | 0 (0 to 0) | 0 (0 to 0) | -7.3% (-17.1% to 1.2%)    |
| 37 | Jordan | Other road injuries                             | 0 (0 to 0) | 0 (0 to 0) | -5.1% (-14.4% to 5.6%)    |
| 38 | Jordan | Other transport injuries                        | 0 (0 to 0) | 0 (0 to 0) | -23.9% (-28.2% to -19.5%) |
| 39 | Jordan | Other unintentional injuries                    | 0 (0 to 0) | 0 (0 to 0) | -17.5% (-24.6% to -10%)   |
| 40 | Jordan | Pedestrian road injuries                        | 0 (0 to 0) | 0 (0 to 0) | -36.8% (-42.5% to -30.4%) |
| 41 | Jordan | Physical violence by firearm                    | 0 (0 to 0) | 0 (0 to 0) | 101.3% (74.8% to 136%)    |
| 42 | Jordan | Physical violence by other means                | 0 (0 to 0) | 0 (0 to 0) | -13.2% (-21.9% to -4.8%)  |
| 43 | Jordan | Physical violence by sharp object               | 0 (0 to 0) | 0 (0 to 0) | -13.2% (-23.7% to -3.6%)  |
| 44 | Jordan | Poisoning by carbon monoxide                    | 0 (0 to 0) | 0 (0 to 0) | 6% (-7.2% to 19.8%)       |
| 45 |        |                                                 |            |            |                           |
| 46 |        |                                                 |            |            |                           |

|    |            |                                                 |            |            |                           |
|----|------------|-------------------------------------------------|------------|------------|---------------------------|
| 1  |            |                                                 |            |            |                           |
| 2  | Jordan     | Poisoning by other means                        | 0 (0 to 0) | 0 (0 to 0) | -26.2% (-35.2% to -17.6%) |
| 3  | Jordan     | Pulmonary aspiration and foreign body in airway | 0 (0 to 0) | 0 (0 to 0) | -17.1% (-24.3% to -9.9%)  |
| 4  | Jordan     | Self-harm by firearm                            | 0 (0 to 0) | 0 (0 to 0) | 18.9% (4.3% to 39.4%)     |
| 5  | Jordan     | Self-harm by other specified means              | 0 (0 to 0) | 0 (0 to 0) | -19.2% (-26.8% to -11.7%) |
| 6  | Jordan     | Unintentional firearm injuries                  | 0 (0 to 0) | 0 (0 to 0) | 7% (-3.9% to 18.5%)       |
| 7  | Jordan     | Venomous animal contact                         | 0 (0 to 0) | 0 (0 to 0) | 1.1% (-4.8% to 7.2%)      |
| 8  | Kazakhstan | Adverse effects of medical treatment            | 0 (0 to 0) | 0 (0 to 0) | 0% (0% to 0%)             |
| 9  | Kazakhstan | Conflict and terrorism                          | 0 (0 to 0) | 0 (0 to 0) | NA                        |
| 10 | Kazakhstan | Cyclist road injuries                           | 0 (0 to 0) | 0 (0 to 0) | -1.6% (-12.1% to 9.7%)    |
| 11 | Kazakhstan | Drowning                                        | 0 (0 to 0) | 0 (0 to 0) | 10.9% (-1.1% to 25.3%)    |
| 12 | Kazakhstan | Environmental heat and cold exposure            | 0 (0 to 0) | 0 (0 to 0) | 78.9% (56.3% to 108.2%)   |
| 13 | Kazakhstan | Executions and police conflict                  | 0 (0 to 0) | 0 (0 to 0) | NA                        |
| 14 | Kazakhstan | Exposure to forces of nature                    | 0 (0 to 0) | 0 (0 to 0) | NA                        |
| 15 | Kazakhstan | Falls                                           | 3 (2 to 4) | 4 (3 to 5) | 11.1% (6.3% to 15.6%)     |
| 16 | Kazakhstan | Fire, heat, and hot substances                  | 0 (0 to 0) | 0 (0 to 0) | -24.1% (-30.7% to -17.3%) |
| 17 | Kazakhstan | Foreign body in eyes                            | 0 (0 to 0) | 0 (0 to 0) | 0% (0% to 0%)             |
| 18 | Kazakhstan | Foreign body in other body part                 | 0 (0 to 0) | 0 (0 to 0) | -0.3% (-4.8% to 3.6%)     |
| 19 | Kazakhstan | Motor vehicle road injuries                     | 1 (1 to 2) | 1 (1 to 2) | -0.2% (-10.9% to 9.5%)    |
| 20 | Kazakhstan | Motorcyclist road injuries                      | 0 (0 to 0) | 0 (0 to 0) | -13% (-26% to 0.7%)       |
| 21 | Kazakhstan | Non-venomous animal contact                     | 0 (0 to 0) | 0 (0 to 0) | -15.2% (-19.6% to -10.9%) |
| 22 | Kazakhstan | Other exposure to mechanical forces             | 1 (0 to 2) | 1 (0 to 1) | -12% (-18.5% to -6%)      |
| 23 | Kazakhstan | Other road injuries                             | 0 (0 to 0) | 0 (0 to 0) | -1.6% (-12.8% to 10.3%)   |
| 24 | Kazakhstan | Other transport injuries                        | 0 (0 to 0) | 0 (0 to 0) | -12.1% (-18% to -5.1%)    |
| 25 | Kazakhstan | Other unintentional injuries                    | 0 (0 to 0) | 0 (0 to 0) | -1.1% (-6.4% to 3%)       |
| 26 | Kazakhstan | Pedestrian road injuries                        | 0 (0 to 1) | 0 (0 to 0) | -26.6% (-36.6% to -16.9%) |
| 27 | Kazakhstan | Physical violence by firearm                    | 0 (0 to 0) | 0 (0 to 0) | 14.4% (-4.8% to 33.7%)    |
| 28 | Kazakhstan | Physical violence by other means                | 0 (0 to 1) | 0 (0 to 0) | -31.3% (-39.1% to -22.4%) |
| 29 | Kazakhstan | Physical violence by sharp object               | 0 (0 to 0) | 0 (0 to 0) | -37.9% (-47.6% to -27.3%) |
| 30 | Kazakhstan | Poisoning by carbon monoxide                    | 0 (0 to 0) | 0 (0 to 0) | 36% (20% to 53.7%)        |
| 31 | Kazakhstan | Poisoning by other means                        | 0 (0 to 0) | 0 (0 to 0) | -31.4% (-39% to -23.6%)   |
| 32 | Kazakhstan | Pulmonary aspiration and foreign body in airway | 0 (0 to 0) | 0 (0 to 0) | -27.8% (-35.3% to -20.9%) |
| 33 | Kazakhstan | Self-harm by firearm                            | 0 (0 to 0) | 0 (0 to 0) | -3.2% (-24.6% to 16.2%)   |
| 34 | Kazakhstan | Self-harm by other specified means              | 0 (0 to 1) | 1 (0 to 1) | 14% (8.6% to 20%)         |
| 35 | Kazakhstan | Unintentional firearm injuries                  | 0 (0 to 0) | 0 (0 to 0) | -22.5% (-33.2% to -11.7%) |
| 36 | Kazakhstan | Venomous animal contact                         | 0 (0 to 0) | 0 (0 to 0) | -14.4% (-19.3% to -8.7%)  |
| 37 | Kenya      | Adverse effects of medical treatment            | 0 (0 to 0) | 0 (0 to 0) | 0% (0% to 0%)             |
| 38 | Kenya      | Conflict and terrorism                          | 0 (0 to 0) | 0 (0 to 0) | NA                        |
| 39 | Kenya      | Cyclist road injuries                           | 0 (0 to 1) | 0 (0 to 1) | 8.2% (5.8% to 10.6%)      |
| 40 | Kenya      | Drowning                                        | 0 (0 to 0) | 0 (0 to 0) | -19.8% (-23% to -16.8%)   |
| 41 | Kenya      | Environmental heat and cold exposure            | 0 (0 to 0) | 0 (0 to 0) | -0.8% (-3.4% to 1.7%)     |
| 42 | Kenya      | Executions and police conflict                  | 0 (0 to 0) | 0 (0 to 0) | NA                        |
| 43 | Kenya      | Exposure to forces of nature                    | 0 (0 to 0) | 0 (0 to 0) | NA                        |
| 44 | Kenya      | Falls                                           | 1 (1 to 2) | 1 (1 to 2) | 6.2% (5% to 7.4%)         |
| 45 |            |                                                 |            |            |                           |
| 46 |            |                                                 |            |            |                           |

|    |          |                                                 |            |            |                           |
|----|----------|-------------------------------------------------|------------|------------|---------------------------|
| 1  |          |                                                 |            |            |                           |
| 2  | Kenya    | Fire, heat, and hot substances                  | 0 (0 to 0) | 0 (0 to 0) | -10.6% (-12.3% to -9%)    |
| 3  | Kenya    | Foreign body in eyes                            | 0 (0 to 0) | 0 (0 to 0) | 0% (0% to 0%)             |
| 4  | Kenya    | Foreign body in other body part                 | 0 (0 to 1) | 0 (0 to 1) | -4.1% (-5.1% to -2.8%)    |
| 5  | Kenya    | Motor vehicle road injuries                     | 1 (0 to 1) | 1 (0 to 1) | 4.8% (2.6% to 7.2%)       |
| 6  | Kenya    | Motorcyclist road injuries                      | 0 (0 to 0) | 0 (0 to 0) | 8.1% (5.7% to 10.4%)      |
| 7  | Kenya    | Non-venomous animal contact                     | 0 (0 to 1) | 0 (0 to 0) | -9.9% (-11.5% to -7.9%)   |
| 8  | Kenya    | Other exposure to mechanical forces             | 0 (0 to 0) | 0 (0 to 0) | -5.2% (-8.1% to -1.6%)    |
| 9  | Kenya    | Other road injuries                             | 0 (0 to 0) | 0 (0 to 0) | -0.3% (-3.1% to 2.6%)     |
| 10 | Kenya    | Other transport injuries                        | 0 (0 to 0) | 0 (0 to 0) | -6% (-7.3% to -4.8%)      |
| 11 | Kenya    | Other unintentional injuries                    | 0 (0 to 0) | 0 (0 to 0) | -13.4% (-17.5% to -9%)    |
| 12 | Kenya    | Pedestrian road injuries                        | 1 (0 to 1) | 1 (0 to 1) | -5.1% (-7.4% to -2.6%)    |
| 13 | Kenya    | Physical violence by firearm                    | 0 (0 to 0) | 0 (0 to 0) | 10.1% (7.7% to 12.8%)     |
| 14 | Kenya    | Physical violence by other means                | 0 (0 to 0) | 0 (0 to 0) | 6.2% (4.4% to 7.8%)       |
| 15 | Kenya    | Physical violence by sharp object               | 0 (0 to 0) | 0 (0 to 0) | 7.5% (5.7% to 9%)         |
| 16 | Kenya    | Poisoning by carbon monoxide                    | 0 (0 to 0) | 0 (0 to 0) | 11.2% (7.4% to 15.7%)     |
| 17 | Kenya    | Poisoning by other means                        | 0 (0 to 0) | 0 (0 to 0) | -10.6% (-13.5% to -7.7%)  |
| 18 | Kenya    | Pulmonary aspiration and foreign body in airway | 0 (0 to 0) | 0 (0 to 0) | -11.4% (-13.5% to -9.6%)  |
| 19 | Kenya    | Self-harm by firearm                            | 0 (0 to 0) | 0 (0 to 0) | 14.4% (8% to 24.2%)       |
| 20 | Kenya    | Self-harm by other specified means              | 0 (0 to 0) | 0 (0 to 0) | -4.9% (-8.3% to -1.3%)    |
| 21 | Kenya    | Unintentional firearm injuries                  | 0 (0 to 0) | 0 (0 to 0) | -15.4% (-19.6% to -11%)   |
| 22 | Kenya    | Venomous animal contact                         | 0 (0 to 0) | 0 (0 to 0) | -20% (-24.1% to -16.2%)   |
| 23 | Kiribati | Adverse effects of medical treatment            | 0 (0 to 0) | 0 (0 to 0) | 0% (0% to 0%)             |
| 24 | Kiribati | Conflict and terrorism                          | 0 (0 to 0) | 0 (0 to 0) | NA                        |
| 25 | Kiribati | Cyclist road injuries                           | 0 (0 to 0) | 0 (0 to 0) | -2% (-12.1% to 8.2%)      |
| 26 | Kiribati | Drowning                                        | 0 (0 to 0) | 0 (0 to 0) | -11.8% (-18.4% to -4.2%)  |
| 27 | Kiribati | Environmental heat and cold exposure            | 0 (0 to 0) | 0 (0 to 0) | 12.6% (5.9% to 19.6%)     |
| 28 | Kiribati | Executions and police conflict                  | 0 (0 to 0) | 0 (0 to 0) | NA                        |
| 29 | Kiribati | Exposure to forces of nature                    | 0 (0 to 0) | 0 (0 to 0) | NA                        |
| 30 | Kiribati | Falls                                           | 1 (1 to 1) | 1 (1 to 1) | 38.9% (33.7% to 44.9%)    |
| 31 | Kiribati | Fire, heat, and hot substances                  | 0 (0 to 0) | 0 (0 to 0) | 4.7% (-0.6% to 12%)       |
| 32 | Kiribati | Foreign body in eyes                            | 0 (0 to 0) | 0 (0 to 0) | 0% (0% to 0%)             |
| 33 | Kiribati | Foreign body in other body part                 | 0 (0 to 0) | 0 (0 to 0) | -1.9% (-5.4% to 1.7%)     |
| 34 | Kiribati | Motor vehicle road injuries                     | 0 (0 to 1) | 0 (0 to 0) | -14.7% (-23.9% to -5.8%)  |
| 35 | Kiribati | Motorcyclist road injuries                      | 0 (0 to 0) | 0 (0 to 1) | 56.9% (38.5% to 80.7%)    |
| 36 | Kiribati | Non-venomous animal contact                     | 0 (0 to 0) | 0 (0 to 0) | -1.9% (-6.3% to 2.2%)     |
| 37 | Kiribati | Other exposure to mechanical forces             | 0 (0 to 0) | 0 (0 to 0) | -17.6% (-26% to -10.8%)   |
| 38 | Kiribati | Other road injuries                             | 0 (0 to 0) | 0 (0 to 0) | -8.3% (-19.7% to 3.9%)    |
| 39 | Kiribati | Other transport injuries                        | 0 (0 to 0) | 0 (0 to 0) | -17.3% (-24% to -11.4%)   |
| 40 | Kiribati | Other unintentional injuries                    | 0 (0 to 0) | 0 (0 to 0) | -7.5% (-12.5% to -2.4%)   |
| 41 | Kiribati | Pedestrian road injuries                        | 0 (0 to 0) | 0 (0 to 0) | -33.2% (-43.2% to -22.8%) |
| 42 | Kiribati | Physical violence by firearm                    | 0 (0 to 0) | 0 (0 to 0) | -9% (-18.6% to 1.8%)      |
| 43 | Kiribati | Physical violence by other means                | 0 (0 to 1) | 0 (0 to 0) | -25.9% (-31.6% to -19.6%) |
| 44 | Kiribati | Physical violence by sharp object               | 0 (0 to 0) | 0 (0 to 0) | -22.5% (-29.9% to -14%)   |
| 45 |          |                                                 |            |            |                           |
| 46 |          |                                                 |            |            |                           |

|    |            |                                                 |              |            |                           |
|----|------------|-------------------------------------------------|--------------|------------|---------------------------|
| 1  |            |                                                 |              |            |                           |
| 2  | Kiribati   | Poisoning by carbon monoxide                    | 0 (0 to 0)   | 0 (0 to 0) | 21% (7.8% to 36.5%)       |
| 3  | Kiribati   | Poisoning by other means                        | 0 (0 to 0)   | 0 (0 to 0) | -1.7% (-24.8% to -9.5%)   |
| 4  | Kiribati   | Pulmonary aspiration and foreign body in airway | 0 (0 to 0)   | 0 (0 to 0) | -1.2% (-11.2% to 9.2%)    |
| 5  | Kiribati   | Self-harm by firearm                            | 0 (0 to 0)   | 0 (0 to 0) | -2.4% (-21.3% to 20.8%)   |
| 6  | Kiribati   | Self-harm by other specified means              | 0 (0 to 1)   | 0 (0 to 1) | -14.7% (-19.9% to -8.7%)  |
| 7  | Kiribati   | Unintentional firearm injuries                  | 0 (0 to 0)   | 0 (0 to 0) | 1% (-5.7% to 8.2%)        |
| 8  | Kiribati   | Venomous animal contact                         | 0 (0 to 0)   | 0 (0 to 0) | 4.2% (-2.6% to 11.5%)     |
| 9  | Kuwait     | Adverse effects of medical treatment            | 0 (0 to 0)   | 0 (0 to 0) | 0% (0% to 0%)             |
| 10 | Kuwait     | Conflict and terrorism                          | 31 (7 to 92) | 0 (0 to 0) | NA                        |
| 11 | Kuwait     | Cyclist road injuries                           | 0 (0 to 0)   | 0 (0 to 0) | -21.2% (-29.6% to -11.6%) |
| 12 | Kuwait     | Drowning                                        | 0 (0 to 0)   | 0 (0 to 0) | 94.8% (68.6% to 132.5%)   |
| 13 | Kuwait     | Environmental heat and cold exposure            | 0 (0 to 0)   | 0 (0 to 0) | 3.3% (-1.9% to 8.6%)      |
| 14 | Kuwait     | Executions and police conflict                  | 0 (0 to 0)   | 0 (0 to 0) | NA                        |
| 15 | Kuwait     | Exposure to forces of nature                    | 0 (0 to 0)   | 0 (0 to 0) | NA                        |
| 16 | Kuwait     | Falls                                           | 2 (1 to 3)   | 2 (2 to 3) | 14.6% (9.9% to 19.7%)     |
| 17 | Kuwait     | Fire, heat, and hot substances                  | 0 (0 to 0)   | 0 (0 to 0) | 2.2% (-3.4% to 7.5%)      |
| 18 | Kuwait     | Foreign body in eyes                            | 0 (0 to 0)   | 0 (0 to 0) | 0% (0% to 0%)             |
| 19 | Kuwait     | Foreign body in other body part                 | 0 (0 to 0)   | 0 (0 to 0) | 0.3% (-3% to 4%)          |
| 20 | Kuwait     | Motor vehicle road injuries                     | 1 (0 to 2)   | 1 (0 to 1) | -28.1% (-35.7% to -20.6%) |
| 21 | Kuwait     | Motorcyclist road injuries                      | 0 (0 to 0)   | 0 (0 to 0) | -14.9% (-26.8% to -2.7%)  |
| 22 | Kuwait     | Non-venomous animal contact                     | 0 (0 to 0)   | 0 (0 to 0) | 2.5% (-1.4% to 6.4%)      |
| 23 | Kuwait     | Other exposure to mechanical forces             | 0 (0 to 0)   | 0 (0 to 0) | 0.2% (-8.3% to 8.1%)      |
| 24 | Kuwait     | Other road injuries                             | 0 (0 to 0)   | 0 (0 to 0) | -13.3% (-24% to -1%)      |
| 25 | Kuwait     | Other transport injuries                        | 0 (0 to 0)   | 0 (0 to 0) | -22.2% (-27.3% to -17.2%) |
| 26 | Kuwait     | Other unintentional injuries                    | 0 (0 to 0)   | 0 (0 to 0) | 6.3% (-0.5% to 12.8%)     |
| 27 | Kuwait     | Pedestrian road injuries                        | 0 (0 to 1)   | 0 (0 to 0) | -38.3% (-45.6% to -31.3%) |
| 28 | Kuwait     | Physical violence by firearm                    | 0 (0 to 0)   | 0 (0 to 0) | 38.1% (20.3% to 60.2%)    |
| 29 | Kuwait     | Physical violence by other means                | 0 (0 to 0)   | 0 (0 to 0) | -22% (-29.6% to -14.1%)   |
| 30 | Kuwait     | Physical violence by sharp object               | 0 (0 to 0)   | 0 (0 to 0) | -32.9% (-41.8% to -25.1%) |
| 31 | Kuwait     | Poisoning by carbon monoxide                    | 0 (0 to 0)   | 0 (0 to 0) | 15.8% (5% to 28%)         |
| 32 | Kuwait     | Poisoning by other means                        | 0 (0 to 0)   | 0 (0 to 0) | -10% (-16.8% to -1.4%)    |
| 33 | Kuwait     | Pulmonary aspiration and foreign body in airway | 0 (0 to 0)   | 0 (0 to 0) | -12.9% (-21.3% to -4.8%)  |
| 34 | Kuwait     | Self-harm by firearm                            | 0 (0 to 0)   | 0 (0 to 0) | 30.1% (18.4% to 44%)      |
| 35 | Kuwait     | Self-harm by other specified means              | 0 (0 to 0)   | 0 (0 to 0) | 11.4% (4.1% to 18.9%)     |
| 36 | Kuwait     | Unintentional firearm injuries                  | 0 (0 to 0)   | 0 (0 to 0) | 8.3% (-1.3% to 19.3%)     |
| 37 | Kuwait     | Venomous animal contact                         | 0 (0 to 0)   | 0 (0 to 0) | 2.8% (-3.9% to 9.1%)      |
| 38 | Kyrgyzstan | Adverse effects of medical treatment            | 0 (0 to 0)   | 0 (0 to 0) | 0% (0% to 0%)             |
| 39 | Kyrgyzstan | Conflict and terrorism                          | 0 (0 to 0)   | 0 (0 to 0) | NA                        |
| 40 | Kyrgyzstan | Cyclist road injuries                           | 0 (0 to 0)   | 0 (0 to 0) | -2.9% (-12.1% to 7%)      |
| 41 | Kyrgyzstan | Drowning                                        | 0 (0 to 0)   | 0 (0 to 0) | -5.9% (-18.1% to 5.6%)    |
| 42 | Kyrgyzstan | Environmental heat and cold exposure            | 0 (0 to 0)   | 0 (0 to 0) | 10% (-1.1% to 21.7%)      |
| 43 | Kyrgyzstan | Executions and police conflict                  | 0 (0 to 0)   | 0 (0 to 0) | NA                        |
| 44 | Kyrgyzstan | Exposure to forces of nature                    | 0 (0 to 0)   | 0 (0 to 0) | NA                        |
| 45 |            |                                                 |              |            |                           |
| 46 |            |                                                 |              |            |                           |

|    |                                  |                                                 |             |            |                           |
|----|----------------------------------|-------------------------------------------------|-------------|------------|---------------------------|
| 1  |                                  |                                                 |             |            |                           |
| 2  | Kyrgyzstan                       | Falls                                           | 3 (3 to 4)  | 2 (2 to 3) | -28.6% (-33.5% to -22.9%) |
| 3  | Kyrgyzstan                       | Fire, heat, and hot substances                  | 0 (0 to 0)  | 0 (0 to 0) | -29.2% (-37.7% to -20.5%) |
| 4  | Kyrgyzstan                       | Foreign body in eyes                            | 0 (0 to 0)  | 0 (0 to 0) | 0% (0% to 0%)             |
| 5  | Kyrgyzstan                       | Foreign body in other body part                 | 0 (0 to 0)  | 0 (0 to 0) | 0.3% (-4% to 4.2%)        |
| 6  | Kyrgyzstan                       | Motor vehicle road injuries                     | 1 (1 to 2)  | 1 (1 to 2) | -6% (-15.1% to 3.5%)      |
| 7  | Kyrgyzstan                       | Motorcyclist road injuries                      | 0 (0 to 0)  | 0 (0 to 0) | -38.5% (-48.4% to -27.9%) |
| 8  | Kyrgyzstan                       | Non-venomous animal contact                     | 0 (0 to 0)  | 0 (0 to 0) | 8.6% (4.2% to 14%)        |
| 9  | Kyrgyzstan                       | Other exposure to mechanical forces             | 1 (0 to 1)  | 1 (0 to 1) | -2.7% (-8% to 2%)         |
| 10 | Kyrgyzstan                       | Other road injuries                             | 0 (0 to 0)  | 0 (0 to 0) | -23.7% (-33.8% to -13.3%) |
| 11 | Kyrgyzstan                       | Other transport injuries                        | 0 (0 to 0)  | 0 (0 to 0) | -3.3% (-7.8% to 1.8%)     |
| 12 | Kyrgyzstan                       | Other unintentional injuries                    | 0 (0 to 0)  | 0 (0 to 0) | -22% (-28.1% to -15.6%)   |
| 13 | Kyrgyzstan                       | Pedestrian road injuries                        | 0 (0 to 1)  | 0 (0 to 0) | -12.9% (-24% to -1.4%)    |
| 14 | Kyrgyzstan                       | Physical violence by firearm                    | 0 (0 to 0)  | 0 (0 to 0) | -11.4% (-28.2% to 6.8%)   |
| 15 | Kyrgyzstan                       | Physical violence by other means                | 0 (0 to 1)  | 0 (0 to 0) | -49.2% (-55.5% to -42.2%) |
| 16 | Kyrgyzstan                       | Physical violence by sharp object               | 0 (0 to 0)  | 0 (0 to 0) | -55.1% (-62% to -47.7%)   |
| 17 | Kyrgyzstan                       | Poisoning by carbon monoxide                    | 0 (0 to 0)  | 0 (0 to 0) | -17.3% (-32.3% to 1.4%)   |
| 18 | Kyrgyzstan                       | Poisoning by other means                        | 0 (0 to 0)  | 0 (0 to 0) | -16.8% (-27.5% to -4.9%)  |
| 19 | Kyrgyzstan                       | Pulmonary aspiration and foreign body in airway | 0 (0 to 0)  | 0 (0 to 0) | -14.9% (-22.8% to -7.2%)  |
| 20 | Kyrgyzstan                       | Self-harm by firearm                            | 0 (0 to 0)  | 0 (0 to 0) | -25% (-39.4% to -9%)      |
| 21 | Kyrgyzstan                       | Self-harm by other specified means              | 0 (0 to 0)  | 0 (0 to 0) | -19.7% (-23.9% to -15.3%) |
| 22 | Kyrgyzstan                       | Unintentional firearm injuries                  | 0 (0 to 0)  | 0 (0 to 0) | -4.6% (-12.6% to 3.4%)    |
| 23 | Kyrgyzstan                       | Venomous animal contact                         | 0 (0 to 0)  | 0 (0 to 0) | 2.6% (-3.7% to 8.8%)      |
| 24 | Lao People's Democratic Republic | Adverse effects of medical treatment            | 0 (0 to 0)  | 0 (0 to 0) | 0% (0% to 0%)             |
| 25 | Lao People's Democratic Republic | Conflict and terrorism                          | 3 (1 to 11) | 0 (0 to 0) | NA                        |
| 26 | Lao People's Democratic Republic | Cyclist road injuries                           | 0 (0 to 0)  | 0 (0 to 0) | -7.3% (-15.6% to 1%)      |
| 27 | Lao People's Democratic Republic | Drowning                                        | 0 (0 to 0)  | 0 (0 to 0) | -43.4% (-47.5% to -37.8%) |
| 28 | Lao People's Democratic Republic | Environmental heat and cold exposure            | 0 (0 to 0)  | 0 (0 to 0) | -7% (-12.6% to -1.8%)     |
| 29 | Lao People's Democratic Republic | Executions and police conflict                  | 0 (0 to 0)  | 0 (0 to 0) | NA                        |
| 30 | Lao People's Democratic Republic | Exposure to forces of nature                    | 0 (0 to 0)  | 0 (0 to 0) | NA                        |
| 31 | Lao People's Democratic Republic | Falls                                           | 1 (1 to 1)  | 1 (1 to 2) | 39.1% (33.8% to 44.8%)    |
| 32 | Lao People's Democratic Republic | Fire, heat, and hot substances                  | 0 (0 to 0)  | 0 (0 to 0) | -33.2% (-39% to -28.4%)   |
| 33 | Lao People's Democratic Republic | Foreign body in eyes                            | 0 (0 to 0)  | 0 (0 to 0) | 0% (0% to 0%)             |
| 34 | Lao People's Democratic Republic | Foreign body in other body part                 | 0 (0 to 0)  | 0 (0 to 0) | -3.5% (-7.2% to 0.5%)     |
| 35 | Lao People's Democratic Republic | Motor vehicle road injuries                     | 0 (0 to 1)  | 0 (0 to 1) | -12% (-19.3% to -4.1%)    |
| 36 | Lao People's Democratic Republic | Motorcyclist road injuries                      | 1 (0 to 1)  | 1 (0 to 1) | 1.8% (-6.7% to 10.8%)     |
| 37 | Lao People's Democratic Republic | Non-venomous animal contact                     | 0 (0 to 0)  | 0 (0 to 0) | -36% (-39.6% to -32.6%)   |
| 38 | Lao People's Democratic Republic | Other exposure to mechanical forces             | 0 (0 to 0)  | 0 (0 to 0) | -13% (-20.2% to -7%)      |
| 39 | Lao People's Democratic Republic | Other road injuries                             | 0 (0 to 0)  | 0 (0 to 0) | -0.9% (-10.6% to 8.6%)    |
| 40 | Lao People's Democratic Republic | Other transport injuries                        | 0 (0 to 0)  | 0 (0 to 0) | -28% (-32.6% to -23.2%)   |
| 41 | Lao People's Democratic Republic | Other unintentional injuries                    | 0 (0 to 0)  | 0 (0 to 0) | -14.2% (-19.2% to -8.9%)  |
| 42 | Lao People's Democratic Republic | Pedestrian road injuries                        | 0 (0 to 0)  | 0 (0 to 0) | -30.5% (-36.3% to -23.9%) |
| 43 | Lao People's Democratic Republic | Physical violence by firearm                    | 0 (0 to 0)  | 0 (0 to 0) | -25.9% (-32.2% to -17.7%) |
| 44 | Lao People's Democratic Republic | Physical violence by other means                | 0 (0 to 1)  | 0 (0 to 1) | -25.5% (-30.8% to -19.2%) |
| 45 |                                  |                                                 |             |            |                           |
| 46 |                                  |                                                 |             |            |                           |

|    |                                  |                                                 |              |            |                           |
|----|----------------------------------|-------------------------------------------------|--------------|------------|---------------------------|
| 1  |                                  |                                                 |              |            |                           |
| 2  | Lao People's Democratic Republic | Physical violence by sharp object               | 0 (0 to 1)   | 0 (0 to 0) | -20.4% (-26.8% to -12.5%) |
| 3  | Lao People's Democratic Republic | Poisoning by carbon monoxide                    | 0 (0 to 0)   | 0 (0 to 0) | 16.6% (-2.1% to 38.6%)    |
| 4  | Lao People's Democratic Republic | Poisoning by other means                        | 0 (0 to 0)   | 0 (0 to 0) | -28.1% (-36.5% to -19.4%) |
| 5  | Lao People's Democratic Republic | Pulmonary aspiration and foreign body in airway | 0 (0 to 0)   | 0 (0 to 0) | -37.7% (-45.6% to -30.5%) |
| 6  | Lao People's Democratic Republic | Self-harm by firearm                            | 0 (0 to 0)   | 0 (0 to 0) | -5% (-22.1% to 13.4%)     |
| 7  | Lao People's Democratic Republic | Self-harm by other specified means              | 0 (0 to 0)   | 0 (0 to 0) | -33.5% (-37.4% to -28.5%) |
| 8  | Lao People's Democratic Republic | Unintentional firearm injuries                  | 0 (0 to 0)   | 0 (0 to 0) | -18% (-26.2% to -10.9%)   |
| 9  | Lao People's Democratic Republic | Venomous animal contact                         | 0 (0 to 0)   | 0 (0 to 0) | -33.8% (-41.7% to -27%)   |
| 10 | Latvia                           | Adverse effects of medical treatment            | 0 (0 to 0)   | 0 (0 to 0) | 0% (0% to 0%)             |
| 11 | Latvia                           | Conflict and terrorism                          | 0 (0 to 0)   | 0 (0 to 0) | NA                        |
| 12 | Latvia                           | Cyclist road injuries                           | 1 (0 to 1)   | 0 (0 to 1) | -41% (-49.1% to -31.8%)   |
| 13 | Latvia                           | Drowning                                        | 0 (0 to 0)   | 0 (0 to 0) | -8.2% (-17.6% to 1.2%)    |
| 14 | Latvia                           | Environmental heat and cold exposure            | 0 (0 to 0)   | 0 (0 to 1) | 27.1% (15.8% to 41.9%)    |
| 15 | Latvia                           | Executions and police conflict                  | 0 (0 to 0)   | 0 (0 to 0) | NA                        |
| 16 | Latvia                           | Exposure to forces of nature                    | 0 (0 to 0)   | 0 (0 to 0) | NA                        |
| 17 | Latvia                           | Falls                                           | 9 (7 to 12)  | 6 (4 to 8) | -34.5% (-37.9% to -31%)   |
| 18 | Latvia                           | Fire, heat, and hot substances                  | 0 (0 to 0)   | 0 (0 to 0) | -38.8% (-43.1% to -33.9%) |
| 19 | Latvia                           | Foreign body in eyes                            | 0 (0 to 0)   | 0 (0 to 0) | 0% (0% to 0%)             |
| 20 | Latvia                           | Foreign body in other body part                 | 0 (0 to 0)   | 0 (0 to 0) | 2.3% (-2.1% to 6.4%)      |
| 21 | Latvia                           | Motor vehicle road injuries                     | 3 (2 to 5)   | 1 (1 to 3) | -50.5% (-57.4% to -41.9%) |
| 22 | Latvia                           | Motorcyclist road injuries                      | 0 (0 to 1)   | 0 (0 to 0) | -49.7% (-59.4% to -38.5%) |
| 23 | Latvia                           | Non-venomous animal contact                     | 0 (0 to 0)   | 0 (0 to 0) | -11% (-15.6% to -6.3%)    |
| 24 | Latvia                           | Other exposure to mechanical forces             | 1 (1 to 2)   | 1 (0 to 2) | -25.2% (-33% to -16.6%)   |
| 25 | Latvia                           | Other road injuries                             | 0 (0 to 0)   | 0 (0 to 0) | -15.5% (-26.8% to -2.5%)  |
| 26 | Latvia                           | Other transport injuries                        | 0 (0 to 0)   | 0 (0 to 0) | -41.2% (-46.3% to -36.4%) |
| 27 | Latvia                           | Other unintentional injuries                    | 0 (0 to 0)   | 0 (0 to 0) | -11.9% (-18.9% to -5.4%)  |
| 28 | Latvia                           | Pedestrian road injuries                        | 1 (0 to 2)   | 0 (0 to 1) | -63.8% (-69.5% to -57.9%) |
| 29 | Latvia                           | Physical violence by firearm                    | 0 (0 to 0)   | 0 (0 to 0) | -18% (-36.5% to 2.9%)     |
| 30 | Latvia                           | Physical violence by other means                | 1 (0 to 1)   | 0 (0 to 1) | -36.7% (-43.4% to -29%)   |
| 31 | Latvia                           | Physical violence by sharp object               | 0 (0 to 0)   | 0 (0 to 0) | -43.9% (-51.9% to -35.7%) |
| 32 | Latvia                           | Poisoning by carbon monoxide                    | 0 (0 to 0)   | 0 (0 to 0) | -0.6% (-17.3% to 17.2%)   |
| 33 | Latvia                           | Poisoning by other means                        | 0 (0 to 0)   | 0 (0 to 0) | 5.7% (-6.3% to 18.1%)     |
| 34 | Latvia                           | Pulmonary aspiration and foreign body in airway | 0 (0 to 0)   | 0 (0 to 0) | -20.8% (-27.3% to -14%)   |
| 35 | Latvia                           | Self-harm by firearm                            | 0 (0 to 0)   | 0 (0 to 0) | -33.4% (-43.7% to -23.3%) |
| 36 | Latvia                           | Self-harm by other specified means              | 1 (0 to 1)   | 0 (0 to 1) | -37.3% (-41.4% to -32.4%) |
| 37 | Latvia                           | Unintentional firearm injuries                  | 0 (0 to 0)   | 0 (0 to 0) | -2.4% (-15.1% to 11.1%)   |
| 38 | Latvia                           | Venomous animal contact                         | 0 (0 to 0)   | 0 (0 to 0) | -8.1% (-14.2% to -1.3%)   |
| 39 | Lebanon                          | Adverse effects of medical treatment            | 0 (0 to 0)   | 0 (0 to 0) | 0% (0% to 0%)             |
| 40 | Lebanon                          | Conflict and terrorism                          | 12 (2 to 35) | 0 (0 to 0) | NA                        |
| 41 | Lebanon                          | Cyclist road injuries                           | 0 (0 to 0)   | 0 (0 to 0) | 2.6% (-4.7% to 12.6%)     |
| 42 | Lebanon                          | Drowning                                        | 0 (0 to 0)   | 0 (0 to 0) | 133.1% (103.2% to 162.3%) |
| 43 | Lebanon                          | Environmental heat and cold exposure            | 0 (0 to 0)   | 0 (0 to 0) | 3.5% (-1.7% to 7.4%)      |
| 44 | Lebanon                          | Executions and police conflict                  | 0 (0 to 0)   | 0 (0 to 0) | NA                        |
| 45 |                                  |                                                 |              |            |                           |
| 46 |                                  |                                                 |              |            |                           |

|    |         |                                                 |            |            |                           |
|----|---------|-------------------------------------------------|------------|------------|---------------------------|
| 1  |         |                                                 |            |            |                           |
| 2  | Lebanon | Exposure to forces of nature                    | 0 (0 to 0) | 0 (0 to 0) | NA                        |
| 3  | Lebanon | Falls                                           | 1 (1 to 2) | 2 (2 to 3) | 54.8% (49.1% to 60.7%)    |
| 4  | Lebanon | Fire, heat, and hot substances                  | 0 (0 to 0) | 0 (0 to 0) | -22.7% (-28.6% to -16.4%) |
| 5  | Lebanon | Foreign body in eyes                            | 0 (0 to 0) | 0 (0 to 0) | 0% (0% to 0%)             |
| 6  | Lebanon | Foreign body in other body part                 | 0 (0 to 0) | 0 (0 to 0) | -0.7% (-4.9% to 3.4%)     |
| 7  | Lebanon | Motor vehicle road injuries                     | 0 (0 to 1) | 0 (0 to 1) | -20.4% (-26.1% to -14.3%) |
| 8  | Lebanon | Motorcyclist road injuries                      | 0 (0 to 0) | 0 (0 to 0) | -5.6% (-14.1% to 4.7%)    |
| 9  | Lebanon | Non-venomous animal contact                     | 0 (0 to 0) | 0 (0 to 0) | -2.8% (-8% to 2%)         |
| 10 | Lebanon | Other exposure to mechanical forces             | 0 (0 to 0) | 0 (0 to 0) | -12.8% (-19.1% to -7.4%)  |
| 11 | Lebanon | Other road injuries                             | 0 (0 to 0) | 0 (0 to 0) | 4.5% (-3.6% to 14.7%)     |
| 12 | Lebanon | Other transport injuries                        | 0 (0 to 0) | 0 (0 to 0) | -0.5% (-4.4% to 3.3%)     |
| 13 | Lebanon | Other unintentional injuries                    | 0 (0 to 0) | 0 (0 to 0) | -6.5% (-11.2% to -1.4%)   |
| 14 | Lebanon | Pedestrian road injuries                        | 0 (0 to 0) | 0 (0 to 0) | -16.8% (-24% to -8.7%)    |
| 15 | Lebanon | Physical violence by firearm                    | 0 (0 to 0) | 0 (0 to 0) | -0.8% (-19.6% to 27.5%)   |
| 16 | Lebanon | Physical violence by other means                | 1 (0 to 2) | 0 (0 to 1) | -65% (-70.6% to -58%)     |
| 17 | Lebanon | Physical violence by sharp object               | 0 (0 to 1) | 0 (0 to 0) | -77.9% (-82.2% to -72.8%) |
| 18 | Lebanon | Poisoning by carbon monoxide                    | 0 (0 to 0) | 0 (0 to 0) | 34.6% (20.5% to 49.3%)    |
| 19 | Lebanon | Poisoning by other means                        | 0 (0 to 0) | 0 (0 to 0) | -19.4% (-27.4% to -12.1%) |
| 20 | Lebanon | Pulmonary aspiration and foreign body in airway | 0 (0 to 0) | 0 (0 to 0) | -13.2% (-20.9% to -5.3%)  |
| 21 | Lebanon | Self-harm by firearm                            | 0 (0 to 0) | 0 (0 to 0) | 34.3% (22.6% to 50.4%)    |
| 22 | Lebanon | Self-harm by other specified means              | 0 (0 to 0) | 0 (0 to 0) | 9% (2.9% to 16.6%)        |
| 23 | Lebanon | Unintentional firearm injuries                  | 0 (0 to 0) | 0 (0 to 0) | -3% (-10% to 4.5%)        |
| 24 | Lebanon | Venomous animal contact                         | 0 (0 to 0) | 0 (0 to 0) | 1.2% (-5.4% to 8.6%)      |
| 25 | Lesotho | Adverse effects of medical treatment            | 0 (0 to 0) | 0 (0 to 0) | 0% (0% to 0%)             |
| 26 | Lesotho | Conflict and terrorism                          | 0 (0 to 0) | 0 (0 to 0) | NA                        |
| 27 | Lesotho | Cyclist road injuries                           | 0 (0 to 1) | 1 (0 to 1) | 52.1% (40.1% to 66.4%)    |
| 28 | Lesotho | Drowning                                        | 0 (0 to 0) | 0 (0 to 0) | -4.6% (-12.2% to 3.1%)    |
| 29 | Lesotho | Environmental heat and cold exposure            | 0 (0 to 0) | 0 (0 to 0) | 2.8% (-2.2% to 7.7%)      |
| 30 | Lesotho | Executions and police conflict                  | 0 (0 to 0) | 0 (0 to 0) | NA                        |
| 31 | Lesotho | Exposure to forces of nature                    | 0 (0 to 1) | 0 (0 to 0) | NA                        |
| 32 | Lesotho | Falls                                           | 2 (2 to 3) | 3 (2 to 4) | 15.6% (11.9% to 20.3%)    |
| 33 | Lesotho | Fire, heat, and hot substances                  | 0 (0 to 0) | 0 (0 to 0) | 18.6% (11.3% to 27.1%)    |
| 34 | Lesotho | Foreign body in eyes                            | 0 (0 to 0) | 0 (0 to 0) | 0% (0% to 0%)             |
| 35 | Lesotho | Foreign body in other body part                 | 1 (0 to 1) | 1 (0 to 1) | -2.7% (-6.7% to 1%)       |
| 36 | Lesotho | Motor vehicle road injuries                     | 1 (0 to 1) | 1 (1 to 2) | 62.5% (49.7% to 77.1%)    |
| 37 | Lesotho | Motorcyclist road injuries                      | 0 (0 to 1) | 0 (0 to 1) | 97.8% (76.5% to 123.2%)   |
| 38 | Lesotho | Non-venomous animal contact                     | 0 (0 to 1) | 0 (0 to 1) | -7.1% (-11.8% to -1.8%)   |
| 39 | Lesotho | Other exposure to mechanical forces             | 0 (0 to 0) | 0 (0 to 0) | -0.2% (-5.5% to 6%)       |
| 40 | Lesotho | Other road injuries                             | 0 (0 to 0) | 0 (0 to 0) | 29.9% (18.8% to 41.3%)    |
| 41 | Lesotho | Other transport injuries                        | 0 (0 to 1) | 0 (0 to 1) | 7.8% (2.4% to 13.8%)      |
| 42 | Lesotho | Other unintentional injuries                    | 0 (0 to 0) | 0 (0 to 0) | -4.9% (-9.9% to 0.5%)     |
| 43 | Lesotho | Pedestrian road injuries                        | 1 (1 to 2) | 2 (1 to 3) | 48.7% (37.9% to 58.8%)    |
| 44 | Lesotho | Physical violence by firearm                    | 0 (0 to 0) | 0 (0 to 0) | 22.4% (9.5% to 35.1%)     |
| 45 |         |                                                 |            |            |                           |
| 46 |         |                                                 |            |            |                           |



|    |         |                                                 |                |             |                           |
|----|---------|-------------------------------------------------|----------------|-------------|---------------------------|
| 1  |         |                                                 |                |             |                           |
| 2  | Lesotho | Physical violence by other means                | 0 (0 to 1)     | 0 (0 to 1)  | 36.5% (26.2% to 47.8%)    |
| 3  | Lesotho | Physical violence by sharp object               | 0 (0 to 0)     | 0 (0 to 0)  | 39.3% (25.1% to 54%)      |
| 4  | Lesotho | Poisoning by carbon monoxide                    | 0 (0 to 0)     | 0 (0 to 0)  | 4.6% (-5.1% to 16%)       |
| 5  | Lesotho | Poisoning by other means                        | 0 (0 to 0)     | 0 (0 to 0)  | -4.2% (-11.6% to 2.9%)    |
| 6  | Lesotho | Pulmonary aspiration and foreign body in airway | 0 (0 to 0)     | 0 (0 to 0)  | -3.6% (-11% to 5.6%)      |
| 7  | Lesotho | Self-harm by firearm                            | 0 (0 to 0)     | 0 (0 to 0)  | 96.2% (66.3% to 137.8%)   |
| 8  | Lesotho | Self-harm by other specified means              | 0 (0 to 0)     | 0 (0 to 0)  | 75.4% (65.9% to 85.7%)    |
| 9  | Lesotho | Unintentional firearm injuries                  | 0 (0 to 0)     | 0 (0 to 0)  | -8.9% (-17.1% to -0.9%)   |
| 10 | Lesotho | Venomous animal contact                         | 0 (0 to 0)     | 0 (0 to 0)  | -15.7% (-21.3% to -9.5%)  |
| 11 | Liberia | Adverse effects of medical treatment            | 0 (0 to 0)     | 0 (0 to 0)  | 0% (0% to 0%)             |
| 12 | Liberia | Conflict and terrorism                          | 58 (11 to 179) | 0 (0 to 0)  | NA                        |
| 13 | Liberia | Cyclist road injuries                           | 1 (0 to 2)     | 1 (1 to 2)  | 6.4% (-0.1% to 13.7%)     |
| 14 | Liberia | Drowning                                        | 0 (0 to 0)     | 0 (0 to 0)  | -14.5% (-22% to -7.2%)    |
| 15 | Liberia | Environmental heat and cold exposure            | 0 (0 to 0)     | 0 (0 to 0)  | 0.7% (-5% to 8.1%)        |
| 16 | Liberia | Executions and police conflict                  | 0 (0 to 0)     | 0 (0 to 0)  | NA                        |
| 17 | Liberia | Exposure to forces of nature                    | 0 (0 to 0)     | 0 (0 to 0)  | NA                        |
| 18 | Liberia | Falls                                           | 2 (2 to 4)     | 3 (2 to 4)  | 18.3% (13.7% to 23%)      |
| 19 | Liberia | Fire, heat, and hot substances                  | 0 (0 to 0)     | 0 (0 to 0)  | -9.9% (-16.4% to -4.1%)   |
| 20 | Liberia | Foreign body in eyes                            | 0 (0 to 0)     | 0 (0 to 0)  | 0% (0% to 0%)             |
| 21 | Liberia | Foreign body in other body part                 | 1 (0 to 1)     | 1 (0 to 1)  | -0.3% (-4.1% to 3.3%)     |
| 22 | Liberia | Motor vehicle road injuries                     | 1 (1 to 3)     | 1 (1 to 2)  | -3% (-9.8% to 4.1%)       |
| 23 | Liberia | Motorcyclist road injuries                      | 1 (0 to 1)     | 1 (0 to 1)  | -0.7% (-7.9% to 7.3%)     |
| 24 | Liberia | Non-venomous animal contact                     | 0 (0 to 0)     | 0 (0 to 0)  | 4.4% (0.2% to 8.8%)       |
| 25 | Liberia | Other exposure to mechanical forces             | 0 (0 to 0)     | 0 (0 to 0)  | -12.3% (-17.3% to -7.5%)  |
| 26 | Liberia | Other road injuries                             | 0 (0 to 0)     | 0 (0 to 0)  | 7.8% (-1.3% to 17%)       |
| 27 | Liberia | Other transport injuries                        | 0 (0 to 0)     | 0 (0 to 0)  | -1.7% (-7.1% to 3.1%)     |
| 28 | Liberia | Other unintentional injuries                    | 0 (0 to 1)     | 0 (0 to 0)  | -15.4% (-20.7% to -10.3%) |
| 29 | Liberia | Pedestrian road injuries                        | 2 (1 to 3)     | 1 (1 to 3)  | -6.8% (-12.6% to -0.7%)   |
| 30 | Liberia | Physical violence by firearm                    | 0 (0 to 0)     | 0 (0 to 0)  | -0.9% (-15% to 15.6%)     |
| 31 | Liberia | Physical violence by other means                | 0 (0 to 0)     | 0 (0 to 0)  | -26.9% (-32.7% to -20.3%) |
| 32 | Liberia | Physical violence by sharp object               | 0 (0 to 0)     | 0 (0 to 0)  | -24.2% (-30.7% to -16.4%) |
| 33 | Liberia | Poisoning by carbon monoxide                    | 0 (0 to 0)     | 0 (0 to 0)  | 12.6% (-2.2% to 30.2%)    |
| 34 | Liberia | Poisoning by other means                        | 0 (0 to 0)     | 0 (0 to 0)  | -22.3% (-29.5% to -14.2%) |
| 35 | Liberia | Pulmonary aspiration and foreign body in airway | 0 (0 to 0)     | 0 (0 to 0)  | -11.2% (-21.7% to -0.8%)  |
| 36 | Liberia | Self-harm by firearm                            | 0 (0 to 0)     | 0 (0 to 0)  | 9.7% (-2.2% to 23%)       |
| 37 | Liberia | Self-harm by other specified means              | 0 (0 to 0)     | 0 (0 to 0)  | 12.3% (6.9% to 18.1%)     |
| 38 | Liberia | Unintentional firearm injuries                  | 0 (0 to 0)     | 0 (0 to 0)  | -19.3% (-26.2% to -12.6%) |
| 39 | Liberia | Venomous animal contact                         | 0 (0 to 0)     | 0 (0 to 0)  | 4.8% (-1.8% to 12.1%)     |
| 40 | Libya   | Adverse effects of medical treatment            | 0 (0 to 0)     | 0 (0 to 0)  | 0% (0% to 0%)             |
| 41 | Libya   | Conflict and terrorism                          | 0 (0 to 0)     | 6 (1 to 19) | NA                        |
| 42 | Libya   | Cyclist road injuries                           | 0 (0 to 0)     | 0 (0 to 0)  | 0% (-9.1% to 10.4%)       |
| 43 | Libya   | Drowning                                        | 0 (0 to 0)     | 0 (0 to 0)  | 25.1% (8.6% to 47.3%)     |
| 44 | Libya   | Environmental heat and cold exposure            | 0 (0 to 0)     | 0 (0 to 0)  | 0.2% (-4.6% to 4.6%)      |
| 45 |         |                                                 |                |             |                           |
| 46 |         |                                                 |                |             |                           |

|    |           |                                                 |             |            |                           |
|----|-----------|-------------------------------------------------|-------------|------------|---------------------------|
| 1  |           |                                                 |             |            |                           |
| 2  | Libya     | Executions and police conflict                  | 0 (0 to 0)  | 0 (0 to 0) | NA                        |
| 3  | Libya     | Exposure to forces of nature                    | 0 (0 to 0)  | 0 (0 to 0) | NA                        |
| 4  | Libya     | Falls                                           | 2 (1 to 2)  | 2 (2 to 3) | 19.4% (15% to 23.9%)      |
| 5  | Libya     | Fire, heat, and hot substances                  | 0 (0 to 0)  | 0 (0 to 0) | -26.3% (-31% to -21.3%)   |
| 6  | Libya     | Foreign body in eyes                            | 0 (0 to 0)  | 0 (0 to 0) | 0% (0% to 0%)             |
| 7  | Libya     | Foreign body in other body part                 | 0 (0 to 0)  | 0 (0 to 0) | -0.7% (-4.6% to 3.4%)     |
| 8  | Libya     | Motor vehicle road injuries                     | 1 (1 to 2)  | 1 (0 to 1) | -24.8% (-30.4% to -19.6%) |
| 9  | Libya     | Motorcyclist road injuries                      | 0 (0 to 0)  | 0 (0 to 0) | -10.9% (-21.2% to -0.1%)  |
| 10 | Libya     | Non-venomous animal contact                     | 0 (0 to 0)  | 0 (0 to 0) | 18.6% (13.3% to 23.5%)    |
| 11 | Libya     | Other exposure to mechanical forces             | 0 (0 to 1)  | 0 (0 to 0) | -18.1% (-23.3% to -13.2%) |
| 12 | Libya     | Other road injuries                             | 0 (0 to 0)  | 0 (0 to 0) | 0.8% (-9.3% to 10.7%)     |
| 13 | Libya     | Other transport injuries                        | 0 (0 to 0)  | 0 (0 to 0) | -1.8% (-6.3% to 2.9%)     |
| 14 | Libya     | Other unintentional injuries                    | 0 (0 to 0)  | 0 (0 to 0) | -10.1% (-14.8% to -5.1%)  |
| 15 | Libya     | Pedestrian road injuries                        | 0 (0 to 1)  | 0 (0 to 0) | -26% (-32.7% to -19.1%)   |
| 16 | Libya     | Physical violence by firearm                    | 0 (0 to 0)  | 0 (0 to 0) | 452.6% (353.8% to 602.8%) |
| 17 | Libya     | Physical violence by other means                | 0 (0 to 0)  | 1 (0 to 1) | 220% (169.9% to 282.4%)   |
| 18 | Libya     | Physical violence by sharp object               | 0 (0 to 0)  | 0 (0 to 0) | 129.3% (87.1% to 175.9%)  |
| 19 | Libya     | Poisoning by carbon monoxide                    | 0 (0 to 0)  | 0 (0 to 0) | 17.6% (5.6% to 30.5%)     |
| 20 | Libya     | Poisoning by other means                        | 0 (0 to 0)  | 0 (0 to 0) | -21.5% (-27.7% to -15%)   |
| 21 | Libya     | Pulmonary aspiration and foreign body in airway | 0 (0 to 0)  | 0 (0 to 0) | -3.9% (-11.5% to 4.3%)    |
| 22 | Libya     | Self-harm by firearm                            | 0 (0 to 0)  | 0 (0 to 0) | 31.3% (18.7% to 45.3%)    |
| 23 | Libya     | Self-harm by other specified means              | 0 (0 to 0)  | 0 (0 to 0) | 11.3% (5.2% to 17%)       |
| 24 | Libya     | Unintentional firearm injuries                  | 0 (0 to 0)  | 0 (0 to 0) | -11.7% (-18.7% to -4.6%)  |
| 25 | Libya     | Venomous animal contact                         | 0 (0 to 0)  | 0 (0 to 0) | 18.1% (10.8% to 25.5%)    |
| 26 | Lithuania | Adverse effects of medical treatment            | 0 (0 to 0)  | 0 (0 to 0) | 0% (0% to 0%)             |
| 27 | Lithuania | Conflict and terrorism                          | 0 (0 to 0)  | 0 (0 to 0) | NA                        |
| 28 | Lithuania | Cyclist road injuries                           | 1 (0 to 2)  | 1 (0 to 1) | -39.1% (-47% to -30.7%)   |
| 29 | Lithuania | Drowning                                        | 0 (0 to 0)  | 0 (0 to 0) | -14.4% (-23.2% to -4.9%)  |
| 30 | Lithuania | Environmental heat and cold exposure            | 0 (0 to 1)  | 0 (0 to 1) | 8% (0.3% to 18.4%)        |
| 31 | Lithuania | Executions and police conflict                  | 0 (0 to 0)  | 0 (0 to 0) | NA                        |
| 32 | Lithuania | Exposure to forces of nature                    | 0 (0 to 0)  | 0 (0 to 0) | NA                        |
| 33 | Lithuania | Falls                                           | 8 (6 to 10) | 7 (5 to 9) | -11.5% (-15.6% to -7.3%)  |
| 34 | Lithuania | Fire, heat, and hot substances                  | 0 (0 to 0)  | 0 (0 to 0) | -28.7% (-35.5% to -22%)   |
| 35 | Lithuania | Foreign body in eyes                            | 0 (0 to 0)  | 0 (0 to 0) | 0% (0% to 0%)             |
| 36 | Lithuania | Foreign body in other body part                 | 0 (0 to 0)  | 0 (0 to 0) | 1.9% (-2.4% to 6.3%)      |
| 37 | Lithuania | Motor vehicle road injuries                     | 3 (1 to 5)  | 2 (1 to 3) | -41.7% (-49.6% to -33.9%) |
| 38 | Lithuania | Motorcyclist road injuries                      | 0 (0 to 0)  | 0 (0 to 0) | -20.4% (-34.1% to -7.5%)  |
| 39 | Lithuania | Non-venomous animal contact                     | 0 (0 to 0)  | 0 (0 to 0) | -12.7% (-17.1% to -8.7%)  |
| 40 | Lithuania | Other exposure to mechanical forces             | 1 (1 to 2)  | 1 (0 to 2) | -11.3% (-18.6% to -4.4%)  |
| 41 | Lithuania | Other road injuries                             | 0 (0 to 0)  | 0 (0 to 0) | -44% (-53.2% to -33.7%)   |
| 42 | Lithuania | Other transport injuries                        | 0 (0 to 0)  | 0 (0 to 0) | -18.4% (-23.8% to -12.8%) |
| 43 | Lithuania | Other unintentional injuries                    | 0 (0 to 1)  | 0 (0 to 0) | -22.5% (-29.3% to -15.7%) |
| 44 | Lithuania | Pedestrian road injuries                        | 1 (1 to 2)  | 0 (0 to 1) | -63.8% (-68.7% to -58.4%) |
| 45 |           |                                                 |             |            |                           |
| 46 |           |                                                 |             |            |                           |

|    |            |                                                 |            |             |                           |
|----|------------|-------------------------------------------------|------------|-------------|---------------------------|
| 1  |            |                                                 |            |             |                           |
| 2  | Lithuania  | Physical violence by firearm                    | 0 (0 to 0) | 0 (0 to 0)  | -28.7% (-45.5% to -10.4%) |
| 3  | Lithuania  | Physical violence by other means                | 0 (0 to 1) | 0 (0 to 1)  | -21.8% (-29.8% to -12.4%) |
| 4  | Lithuania  | Physical violence by sharp object               | 0 (0 to 0) | 0 (0 to 0)  | -39.1% (-47.9% to -30.7%) |
| 5  | Lithuania  | Poisoning by carbon monoxide                    | 0 (0 to 0) | 0 (0 to 0)  | 4.2% (-6.6% to 15.5%)     |
| 6  | Lithuania  | Poisoning by other means                        | 0 (0 to 0) | 0 (0 to 0)  | -6.4% (-15.8% to 3.7%)    |
| 7  | Lithuania  | Pulmonary aspiration and foreign body in airway | 0 (0 to 0) | 0 (0 to 0)  | -17.1% (-23.6% to -10.7%) |
| 8  | Lithuania  | Self-harm by firearm                            | 0 (0 to 0) | 0 (0 to 0)  | -15.3% (-31.1% to 3%)     |
| 9  | Lithuania  | Self-harm by other specified means              | 1 (0 to 1) | 1 (0 to 1)  | -13.1% (-17.4% to -8%)    |
| 10 | Lithuania  | Unintentional firearm injuries                  | 0 (0 to 0) | 0 (0 to 0)  | -9.2% (-20.2% to 2.4%)    |
| 11 | Lithuania  | Venomous animal contact                         | 0 (0 to 0) | 0 (0 to 0)  | -4.5% (-10.4% to 2.6%)    |
| 12 | Luxembourg | Adverse effects of medical treatment            | 0 (0 to 0) | 0 (0 to 0)  | 0% (0% to 0%)             |
| 13 | Luxembourg | Conflict and terrorism                          | 0 (0 to 0) | 0 (0 to 0)  | NA                        |
| 14 | Luxembourg | Cyclist road injuries                           | 0 (0 to 0) | 0 (0 to 0)  | -18.2% (-29.2% to -5.4%)  |
| 15 | Luxembourg | Drowning                                        | 0 (0 to 0) | 0 (0 to 0)  | 79.1% (62.9% to 96.5%)    |
| 16 | Luxembourg | Environmental heat and cold exposure            | 0 (0 to 0) | 0 (0 to 0)  | 0.1% (-4.2% to 4.5%)      |
| 17 | Luxembourg | Executions and police conflict                  | 0 (0 to 0) | 0 (0 to 0)  | NA                        |
| 18 | Luxembourg | Exposure to forces of nature                    | 0 (0 to 0) | 0 (0 to 0)  | NA                        |
| 19 | Luxembourg | Falls                                           | 7 (5 to 9) | 7 (5 to 10) | 6.5% (1.8% to 11.4%)      |
| 20 | Luxembourg | Fire, heat, and hot substances                  | 0 (0 to 0) | 0 (0 to 0)  | -5.1% (-9.9% to 0.9%)     |
| 21 | Luxembourg | Foreign body in eyes                            | 0 (0 to 0) | 0 (0 to 0)  | 0% (0% to 0%)             |
| 22 | Luxembourg | Foreign body in other body part                 | 0 (0 to 0) | 0 (0 to 0)  | 2% (-1.9% to 5.9%)        |
| 23 | Luxembourg | Motor vehicle road injuries                     | 1 (0 to 1) | 0 (0 to 1)  | -55.4% (-61.8% to -49%)   |
| 24 | Luxembourg | Motorcyclist road injuries                      | 0 (0 to 0) | 0 (0 to 0)  | -11.7% (-27.1% to 7.1%)   |
| 25 | Luxembourg | Non-venomous animal contact                     | 0 (0 to 0) | 0 (0 to 0)  | -19.2% (-22.8% to -15.4%) |
| 26 | Luxembourg | Other exposure to mechanical forces             | 1 (0 to 1) | 0 (0 to 1)  | -22.9% (-30.2% to -15.8%) |
| 27 | Luxembourg | Other road injuries                             | 0 (0 to 0) | 0 (0 to 0)  | -3.2% (-16.8% to 12.8%)   |
| 28 | Luxembourg | Other transport injuries                        | 0 (0 to 0) | 0 (0 to 0)  | -0.1% (-5.7% to 5%)       |
| 29 | Luxembourg | Other unintentional injuries                    | 1 (0 to 1) | 0 (0 to 0)  | -46.9% (-51.2% to -42.2%) |
| 30 | Luxembourg | Pedestrian road injuries                        | 0 (0 to 0) | 0 (0 to 0)  | -60.1% (-67.3% to -51.9%) |
| 31 | Luxembourg | Physical violence by firearm                    | 0 (0 to 0) | 0 (0 to 0)  | 42.4% (25.4% to 65.3%)    |
| 32 | Luxembourg | Physical violence by other means                | 0 (0 to 0) | 0 (0 to 0)  | -26.5% (-34.6% to -18.1%) |
| 33 | Luxembourg | Physical violence by sharp object               | 0 (0 to 0) | 0 (0 to 0)  | -26.1% (-37% to -16.3%)   |
| 34 | Luxembourg | Poisoning by carbon monoxide                    | 0 (0 to 0) | 0 (0 to 0)  | 4.7% (-3.5% to 13.1%)     |
| 35 | Luxembourg | Poisoning by other means                        | 0 (0 to 0) | 0 (0 to 0)  | -9% (-14.8% to -3.6%)     |
| 36 | Luxembourg | Pulmonary aspiration and foreign body in airway | 0 (0 to 0) | 0 (0 to 0)  | -22.4% (-29.4% to -16.3%) |
| 37 | Luxembourg | Self-harm by firearm                            | 0 (0 to 0) | 0 (0 to 0)  | 4.9% (-8.9% to 21.4%)     |
| 38 | Luxembourg | Self-harm by other specified means              | 0 (0 to 1) | 0 (0 to 0)  | -39% (-43.9% to -33.8%)   |
| 39 | Luxembourg | Unintentional firearm injuries                  | 0 (0 to 0) | 0 (0 to 0)  | -1.6% (-10.6% to 8%)      |
| 40 | Luxembourg | Venomous animal contact                         | 0 (0 to 0) | 0 (0 to 0)  | -18.3% (-23.5% to -12%)   |
| 41 | Madagascar | Adverse effects of medical treatment            | 0 (0 to 0) | 0 (0 to 0)  | 0% (0% to 0%)             |
| 42 | Madagascar | Conflict and terrorism                          | 0 (0 to 0) | 0 (0 to 0)  | NA                        |
| 43 | Madagascar | Cyclist road injuries                           | 1 (1 to 3) | 1 (1 to 3)  | -3.2% (-9.9% to 4.4%)     |
| 44 | Madagascar | Drowning                                        | 0 (0 to 0) | 0 (0 to 0)  | -12.3% (-20.3% to -4.1%)  |
| 45 |            |                                                 |            |             |                           |
| 46 |            |                                                 |            |             |                           |

|    |            |                                                 |            |            |                           |
|----|------------|-------------------------------------------------|------------|------------|---------------------------|
| 1  |            |                                                 |            |            |                           |
| 2  | Madagascar | Environmental heat and cold exposure            | 0 (0 to 0) | 0 (0 to 0) | -3.6% (-9.2% to 2.5%)     |
| 3  | Madagascar | Executions and police conflict                  | 0 (0 to 0) | 0 (0 to 0) | NA                        |
| 4  | Madagascar | Exposure to forces of nature                    | 0 (0 to 0) | 0 (0 to 0) | NA                        |
| 5  | Madagascar | Falls                                           | 3 (2 to 4) | 3 (2 to 5) | 13.5% (9% to 17.9%)       |
| 6  | Madagascar | Fire, heat, and hot substances                  | 0 (0 to 0) | 0 (0 to 0) | -14.5% (-19.8% to -9.6%)  |
| 7  | Madagascar | Foreign body in eyes                            | 0 (0 to 0) | 0 (0 to 0) | 0% (0% to 0%)             |
| 8  | Madagascar | Foreign body in other body part                 | 1 (0 to 1) | 1 (0 to 1) | 3.8% (-0.8% to 8.3%)      |
| 9  | Madagascar | Motor vehicle road injuries                     | 1 (1 to 3) | 1 (1 to 2) | -12.1% (-19.7% to -4%)    |
| 10 | Madagascar | Motorcyclist road injuries                      | 0 (0 to 1) | 0 (0 to 1) | -12.7% (-20.2% to -4.2%)  |
| 11 | Madagascar | Non-venomous animal contact                     | 1 (0 to 1) | 0 (0 to 1) | -10% (-14.5% to -5.9%)    |
| 12 | Madagascar | Other exposure to mechanical forces             | 0 (0 to 1) | 0 (0 to 1) | -11.3% (-17% to -5%)      |
| 13 | Madagascar | Other road injuries                             | 0 (0 to 0) | 0 (0 to 0) | 6.2% (-3.7% to 17.2%)     |
| 14 | Madagascar | Other transport injuries                        | 0 (0 to 1) | 0 (0 to 1) | -3.3% (-8.2% to 1.5%)     |
| 15 | Madagascar | Other unintentional injuries                    | 0 (0 to 1) | 0 (0 to 0) | -12.2% (-17.8% to -6%)    |
| 16 | Madagascar | Pedestrian road injuries                        | 2 (1 to 5) | 2 (1 to 4) | -16.8% (-22.4% to -10.4%) |
| 17 | Madagascar | Physical violence by firearm                    | 0 (0 to 0) | 0 (0 to 0) | 17.8% (5.7% to 32.8%)     |
| 18 | Madagascar | Physical violence by other means                | 0 (0 to 0) | 0 (0 to 0) | 5.8% (-1.7% to 15.4%)     |
| 19 | Madagascar | Physical violence by sharp object               | 0 (0 to 0) | 0 (0 to 0) | 7.5% (-2.1% to 19.5%)     |
| 20 | Madagascar | Poisoning by carbon monoxide                    | 0 (0 to 0) | 0 (0 to 0) | 14.6% (1.4% to 31.1%)     |
| 21 | Madagascar | Poisoning by other means                        | 0 (0 to 0) | 0 (0 to 0) | -21.7% (-29.5% to -13%)   |
| 22 | Madagascar | Pulmonary aspiration and foreign body in airway | 0 (0 to 0) | 0 (0 to 0) | -7.9% (-18.5% to 2.2%)    |
| 23 | Madagascar | Self-harm by firearm                            | 0 (0 to 0) | 0 (0 to 0) | 12.1% (0% to 27.1%)       |
| 24 | Madagascar | Self-harm by other specified means              | 0 (0 to 0) | 0 (0 to 0) | -12.9% (-17.7% to -8.4%)  |
| 25 | Madagascar | Unintentional firearm injuries                  | 0 (0 to 0) | 0 (0 to 0) | -14.4% (-21.8% to -7.3%)  |
| 26 | Madagascar | Venomous animal contact                         | 0 (0 to 0) | 0 (0 to 0) | -21% (-27.6% to -15.1%)   |
| 27 | Malawi     | Adverse effects of medical treatment            | 0 (0 to 0) | 0 (0 to 0) | 0% (0% to 0%)             |
| 28 | Malawi     | Conflict and terrorism                          | 0 (0 to 0) | 0 (0 to 0) | NA                        |
| 29 | Malawi     | Cyclist road injuries                           | 1 (1 to 2) | 1 (1 to 2) | -2.2% (-8.2% to 5.1%)     |
| 30 | Malawi     | Drowning                                        | 0 (0 to 0) | 0 (0 to 0) | -4.9% (-12% to 1.7%)      |
| 31 | Malawi     | Environmental heat and cold exposure            | 0 (0 to 0) | 0 (0 to 0) | -2.6% (-7.7% to 3.8%)     |
| 32 | Malawi     | Executions and police conflict                  | 0 (0 to 0) | 0 (0 to 0) | NA                        |
| 33 | Malawi     | Exposure to forces of nature                    | 0 (0 to 0) | 0 (0 to 0) | NA                        |
| 34 | Malawi     | Falls                                           | 3 (2 to 5) | 4 (3 to 6) | 18.9% (14.6% to 23.2%)    |
| 35 | Malawi     | Fire, heat, and hot substances                  | 0 (0 to 0) | 0 (0 to 0) | -7.9% (-13.6% to -2.7%)   |
| 36 | Malawi     | Foreign body in eyes                            | 0 (0 to 0) | 0 (0 to 0) | 0% (0% to 0%)             |
| 37 | Malawi     | Foreign body in other body part                 | 1 (0 to 1) | 1 (0 to 1) | -2.5% (-6.3% to 1.9%)     |
| 38 | Malawi     | Motor vehicle road injuries                     | 1 (0 to 2) | 1 (0 to 2) | -5% (-12.6% to 3.4%)      |
| 39 | Malawi     | Motorcyclist road injuries                      | 0 (0 to 1) | 0 (0 to 1) | -18.7% (-25.6% to -11.5%) |
| 40 | Malawi     | Non-venomous animal contact                     | 0 (0 to 1) | 0 (0 to 1) | -11.9% (-16.3% to -7.5%)  |
| 41 | Malawi     | Other exposure to mechanical forces             | 0 (0 to 0) | 0 (0 to 0) | -2.6% (-8% to 3%)         |
| 42 | Malawi     | Other road injuries                             | 0 (0 to 0) | 0 (0 to 0) | 1.7% (-7.4% to 12.4%)     |
| 43 | Malawi     | Other transport injuries                        | 0 (0 to 0) | 0 (0 to 0) | 0% (-4.6% to 4.6%)        |
| 44 | Malawi     | Other unintentional injuries                    | 0 (0 to 0) | 0 (0 to 0) | -7.3% (-14% to -0.4%)     |
| 45 |            |                                                 |            |            |                           |
| 46 |            |                                                 |            |            |                           |

|    |          |                                                 |            |            |                           |
|----|----------|-------------------------------------------------|------------|------------|---------------------------|
| 1  |          |                                                 |            |            |                           |
| 2  | Malawi   | Pedestrian road injuries                        | 2 (1 to 3) | 2 (1 to 3) | -11.9% (-17.4% to -4.6%)  |
| 3  | Malawi   | Physical violence by firearm                    | 0 (0 to 0) | 0 (0 to 0) | 34.6% (21.7% to 52%)      |
| 4  | Malawi   | Physical violence by other means                | 0 (0 to 0) | 0 (0 to 0) | 8.9% (3.3% to 15.8%)      |
| 5  | Malawi   | Physical violence by sharp object               | 0 (0 to 0) | 0 (0 to 0) | 9% (2.1% to 17.3%)        |
| 6  | Malawi   | Poisoning by carbon monoxide                    | 0 (0 to 0) | 0 (0 to 0) | 13.3% (0.6% to 25.9%)     |
| 7  | Malawi   | Poisoning by other means                        | 0 (0 to 0) | 0 (0 to 0) | -17.3% (-24.2% to -9.7%)  |
| 8  | Malawi   | Pulmonary aspiration and foreign body in airway | 0 (0 to 0) | 0 (0 to 0) | -11.4% (-21.2% to -1.1%)  |
| 9  | Malawi   | Self-harm by firearm                            | 0 (0 to 0) | 0 (0 to 0) | 13.9% (1.1% to 31%)       |
| 10 | Malawi   | Self-harm by other specified means              | 0 (0 to 0) | 0 (0 to 0) | -11.2% (-16.7% to -5%)    |
| 11 | Malawi   | Unintentional firearm injuries                  | 0 (0 to 0) | 0 (0 to 0) | -9.9% (-18.1% to -1.3%)   |
| 12 | Malawi   | Venomous animal contact                         | 0 (0 to 0) | 0 (0 to 0) | -13.6% (-22.7% to -4.5%)  |
| 13 | Malaysia | Adverse effects of medical treatment            | 0 (0 to 0) | 0 (0 to 0) | 0% (0% to 0%)             |
| 14 | Malaysia | Conflict and terrorism                          | 0 (0 to 0) | 0 (0 to 0) | NA                        |
| 15 | Malaysia | Cyclist road injuries                           | 0 (0 to 0) | 0 (0 to 0) | 1.2% (-8% to 10.3%)       |
| 16 | Malaysia | Drowning                                        | 0 (0 to 0) | 0 (0 to 0) | 49.6% (34.9% to 64.4%)    |
| 17 | Malaysia | Environmental heat and cold exposure            | 0 (0 to 0) | 0 (0 to 0) | 3.8% (-0.4% to 8.8%)      |
| 18 | Malaysia | Executions and police conflict                  | 0 (0 to 0) | 0 (0 to 0) | NA                        |
| 19 | Malaysia | Exposure to forces of nature                    | 0 (0 to 0) | 0 (0 to 0) | NA                        |
| 20 | Malaysia | Falls                                           | 1 (1 to 2) | 2 (1 to 3) | 41.2% (36% to 45.8%)      |
| 21 | Malaysia | Fire, heat, and hot substances                  | 0 (0 to 0) | 0 (0 to 0) | -10.9% (-15.1% to -6.7%)  |
| 22 | Malaysia | Foreign body in eyes                            | 0 (0 to 0) | 0 (0 to 0) | 0% (0% to 0%)             |
| 23 | Malaysia | Foreign body in other body part                 | 0 (0 to 0) | 0 (0 to 0) | 0.7% (-2.5% to 4.4%)      |
| 24 | Malaysia | Motor vehicle road injuries                     | 1 (0 to 1) | 1 (0 to 1) | 8.1% (-0.9% to 18.5%)     |
| 25 | Malaysia | Motorcyclist road injuries                      | 1 (0 to 1) | 1 (0 to 1) | 5.2% (-4.2% to 16.8%)     |
| 26 | Malaysia | Non-venomous animal contact                     | 0 (0 to 0) | 0 (0 to 0) | -24.8% (-28.6% to -21.2%) |
| 27 | Malaysia | Other exposure to mechanical forces             | 0 (0 to 0) | 0 (0 to 0) | -10.7% (-16.2% to -5.5%)  |
| 28 | Malaysia | Other road injuries                             | 0 (0 to 0) | 0 (0 to 0) | -0.9% (-10.7% to 8.7%)    |
| 29 | Malaysia | Other transport injuries                        | 0 (0 to 0) | 0 (0 to 0) | -13.2% (-17.5% to -8.6%)  |
| 30 | Malaysia | Other unintentional injuries                    | 0 (0 to 0) | 0 (0 to 0) | -18.8% (-24.7% to -13.9%) |
| 31 | Malaysia | Pedestrian road injuries                        | 0 (0 to 0) | 0 (0 to 0) | -10.7% (-18.5% to -3.1%)  |
| 32 | Malaysia | Physical violence by firearm                    | 0 (0 to 0) | 0 (0 to 0) | 82.1% (65.6% to 103.8%)   |
| 33 | Malaysia | Physical violence by other means                | 0 (0 to 0) | 0 (0 to 0) | 6.1% (-1.1% to 14.1%)     |
| 34 | Malaysia | Physical violence by sharp object               | 0 (0 to 0) | 0 (0 to 0) | 0.5% (-8.3% to 10.8%)     |
| 35 | Malaysia | Poisoning by carbon monoxide                    | 0 (0 to 0) | 0 (0 to 0) | 28.3% (16.5% to 41%)      |
| 36 | Malaysia | Poisoning by other means                        | 0 (0 to 0) | 0 (0 to 0) | -20.7% (-26.8% to -14.2%) |
| 37 | Malaysia | Pulmonary aspiration and foreign body in airway | 0 (0 to 0) | 0 (0 to 0) | -17.4% (-24.9% to -9.4%)  |
| 38 | Malaysia | Self-harm by firearm                            | 0 (0 to 0) | 0 (0 to 0) | 26.5% (8.3% to 49.9%)     |
| 39 | Malaysia | Self-harm by other specified means              | 0 (0 to 0) | 0 (0 to 0) | -3.8% (-9.6% to 2.8%)     |
| 40 | Malaysia | Unintentional firearm injuries                  | 0 (0 to 0) | 0 (0 to 0) | -5.7% (-11.7% to 0.4%)    |
| 41 | Malaysia | Venomous animal contact                         | 0 (0 to 0) | 0 (0 to 0) | -29.5% (-35.9% to -22.9%) |
| 42 | Maldives | Adverse effects of medical treatment            | 0 (0 to 0) | 0 (0 to 0) | 0% (0% to 0%)             |
| 43 | Maldives | Conflict and terrorism                          | 0 (0 to 0) | 0 (0 to 0) | NA                        |
| 44 | Maldives | Cyclist road injuries                           | 0 (0 to 0) | 0 (0 to 0) | -33.3% (-41.7% to -24.8%) |
| 45 |          |                                                 |            |            |                           |
| 46 |          |                                                 |            |            |                           |

|    |          |                                                 |            |            |                           |
|----|----------|-------------------------------------------------|------------|------------|---------------------------|
| 1  |          |                                                 |            |            |                           |
| 2  | Maldives | Drowning                                        | 0 (0 to 0) | 0 (0 to 0) | 35.8% (19.8% to 55.2%)    |
| 3  | Maldives | Environmental heat and cold exposure            | 0 (0 to 0) | 0 (0 to 0) | -6.4% (-10.9% to -1%)     |
| 4  | Maldives | Executions and police conflict                  | 0 (0 to 0) | 0 (0 to 0) | NA                        |
| 5  | Maldives | Exposure to forces of nature                    | 0 (0 to 0) | 0 (0 to 0) | NA                        |
| 6  | Maldives | Falls                                           | 1 (1 to 2) | 2 (1 to 3) | 52.9% (46.3% to 59.7%)    |
| 7  | Maldives | Fire, heat, and hot substances                  | 0 (0 to 0) | 0 (0 to 0) | -35.9% (-43.2% to -29.2%) |
| 8  | Maldives | Foreign body in eyes                            | 0 (0 to 0) | 0 (0 to 0) | 0% (0% to 0%)             |
| 9  | Maldives | Foreign body in other body part                 | 0 (0 to 0) | 0 (0 to 0) | 1.7% (-2.1% to 5.8%)      |
| 10 | Maldives | Motor vehicle road injuries                     | 0 (0 to 0) | 0 (0 to 0) | -11.9% (-20% to -1.7%)    |
| 11 | Maldives | Motorcyclist road injuries                      | 1 (0 to 1) | 0 (0 to 1) | -28.7% (-34.9% to -21.8%) |
| 12 | Maldives | Non-venomous animal contact                     | 0 (0 to 0) | 0 (0 to 0) | -33.9% (-39.5% to -28.4%) |
| 13 | Maldives | Other exposure to mechanical forces             | 0 (0 to 0) | 0 (0 to 0) | -23.1% (-30.9% to -15.3%) |
| 14 | Maldives | Other road injuries                             | 0 (0 to 0) | 0 (0 to 0) | 9% (-2.5% to 23.1%)       |
| 15 | Maldives | Other transport injuries                        | 0 (0 to 0) | 0 (0 to 0) | 4.9% (-2% to 11.2%)       |
| 16 | Maldives | Other unintentional injuries                    | 0 (0 to 0) | 0 (0 to 0) | -30.8% (-37.5% to -22.9%) |
| 17 | Maldives | Pedestrian road injuries                        | 0 (0 to 0) | 0 (0 to 0) | -19.3% (-28.3% to -8.4%)  |
| 18 | Maldives | Physical violence by firearm                    | 0 (0 to 0) | 0 (0 to 0) | 183.8% (148.9% to 232.1%) |
| 19 | Maldives | Physical violence by other means                | 0 (0 to 0) | 0 (0 to 0) | 21.6% (9.9% to 32.5%)     |
| 20 | Maldives | Physical violence by sharp object               | 0 (0 to 0) | 0 (0 to 0) | 18.7% (5.6% to 31.7%)     |
| 21 | Maldives | Poisoning by carbon monoxide                    | 0 (0 to 0) | 0 (0 to 0) | 48.5% (32.6% to 66.7%)    |
| 22 | Maldives | Poisoning by other means                        | 0 (0 to 0) | 0 (0 to 0) | 10.5% (3.9% to 16.7%)     |
| 23 | Maldives | Pulmonary aspiration and foreign body in airway | 0 (0 to 0) | 0 (0 to 0) | -37.2% (-44.1% to -29.2%) |
| 24 | Maldives | Self-harm by firearm                            | 0 (0 to 0) | 0 (0 to 0) | 35.9% (14.5% to 63.7%)    |
| 25 | Maldives | Self-harm by other specified means              | 0 (0 to 0) | 0 (0 to 0) | -23% (-28.8% to -15.9%)   |
| 26 | Maldives | Unintentional firearm injuries                  | 0 (0 to 0) | 0 (0 to 0) | -13% (-21.6% to -2.5%)    |
| 27 | Maldives | Venomous animal contact                         | 0 (0 to 0) | 0 (0 to 0) | -22.3% (-29.6% to -13.1%) |
| 28 | Mali     | Adverse effects of medical treatment            | 0 (0 to 0) | 0 (0 to 0) | 0% (0% to 0%)             |
| 29 | Mali     | Conflict and terrorism                          | 2 (0 to 6) | 1 (0 to 4) | NA                        |
| 30 | Mali     | Cyclist road injuries                           | 1 (0 to 2) | 1 (1 to 2) | 20% (11.8% to 28.8%)      |
| 31 | Mali     | Drowning                                        | 0 (0 to 0) | 0 (0 to 0) | -8.5% (-16.1% to -1%)     |
| 32 | Mali     | Environmental heat and cold exposure            | 0 (0 to 0) | 0 (0 to 0) | -1.5% (-6.4% to 5.1%)     |
| 33 | Mali     | Executions and police conflict                  | 0 (0 to 0) | 0 (0 to 0) | NA                        |
| 34 | Mali     | Exposure to forces of nature                    | 0 (0 to 0) | 0 (0 to 0) | NA                        |
| 35 | Mali     | Falls                                           | 3 (2 to 4) | 3 (2 to 5) | 19% (14.6% to 23.6%)      |
| 36 | Mali     | Fire, heat, and hot substances                  | 0 (0 to 0) | 0 (0 to 0) | -8.8% (-14.3% to -2.9%)   |
| 37 | Mali     | Foreign body in eyes                            | 0 (0 to 0) | 0 (0 to 0) | 0% (0% to 0%)             |
| 38 | Mali     | Foreign body in other body part                 | 1 (0 to 1) | 1 (0 to 1) | 0.8% (-2.9% to 4.2%)      |
| 39 | Mali     | Motor vehicle road injuries                     | 1 (1 to 3) | 2 (1 to 3) | 9.2% (1.5% to 18.5%)      |
| 40 | Mali     | Motorcyclist road injuries                      | 1 (0 to 1) | 1 (0 to 1) | -0.6% (-8.5% to 7.7%)     |
| 41 | Mali     | Non-venomous animal contact                     | 0 (0 to 1) | 0 (0 to 0) | -16.2% (-20% to -11.9%)   |
| 42 | Mali     | Other exposure to mechanical forces             | 0 (0 to 0) | 0 (0 to 0) | -9% (-13.3% to -3.7%)     |
| 43 | Mali     | Other road injuries                             | 0 (0 to 0) | 0 (0 to 0) | 16.8% (5.3% to 28.3%)     |
| 44 | Mali     | Other transport injuries                        | 0 (0 to 0) | 0 (0 to 0) | -12% (-16.4% to -7.5%)    |
| 45 |          |                                                 |            |            |                           |
| 46 |          |                                                 |            |            |                           |

|    |                  |                                                 |            |            |                           |
|----|------------------|-------------------------------------------------|------------|------------|---------------------------|
| 1  |                  |                                                 |            |            |                           |
| 2  | Mali             | Other unintentional injuries                    | 0 (0 to 0) | 0 (0 to 0) | -17.2% (-21.3% to -12.8%) |
| 3  | Mali             | Pedestrian road injuries                        | 2 (1 to 4) | 2 (1 to 3) | -11.1% (-17.6% to -5%)    |
| 4  | Mali             | Physical violence by firearm                    | 0 (0 to 0) | 0 (0 to 0) | 20.3% (8% to 35.8%)       |
| 5  | Mali             | Physical violence by other means                | 0 (0 to 0) | 0 (0 to 0) | 1.6% (-3.9% to 7.4%)      |
| 6  | Mali             | Physical violence by sharp object               | 0 (0 to 0) | 0 (0 to 0) | 1.9% (-4.6% to 9.5%)      |
| 7  | Mali             | Poisoning by carbon monoxide                    | 0 (0 to 0) | 0 (0 to 0) | 13.4% (1.5% to 27.3%)     |
| 8  | Mali             | Poisoning by other means                        | 0 (0 to 0) | 0 (0 to 0) | -20.7% (-27.4% to -13.9%) |
| 9  | Mali             | Pulmonary aspiration and foreign body in airway | 0 (0 to 0) | 0 (0 to 0) | -14.8% (-22.4% to -7.6%)  |
| 10 | Mali             | Self-harm by firearm                            | 0 (0 to 0) | 0 (0 to 0) | 12.5% (2.2% to 26.5%)     |
| 11 | Mali             | Self-harm by other specified means              | 0 (0 to 0) | 0 (0 to 0) | -2.9% (-8.3% to 2.7%)     |
| 12 | Mali             | Unintentional firearm injuries                  | 0 (0 to 0) | 0 (0 to 0) | -17.3% (-24.8% to -9.9%)  |
| 13 | Mali             | Venomous animal contact                         | 0 (0 to 0) | 0 (0 to 0) | -13.4% (-19.6% to -6%)    |
| 14 | Malta            | Adverse effects of medical treatment            | 0 (0 to 0) | 0 (0 to 0) | 0% (0% to 0%)             |
| 15 | Malta            | Conflict and terrorism                          | 0 (0 to 0) | 0 (0 to 0) | NA                        |
| 16 | Malta            | Cyclist road injuries                           | 0 (0 to 0) | 0 (0 to 0) | -7.5% (-16.9% to 3%)      |
| 17 | Malta            | Drowning                                        | 0 (0 to 0) | 0 (0 to 0) | 71.8% (57.9% to 87.4%)    |
| 18 | Malta            | Environmental heat and cold exposure            | 0 (0 to 0) | 0 (0 to 0) | -8.8% (-13.4% to -3.5%)   |
| 19 | Malta            | Executions and police conflict                  | 0 (0 to 0) | 0 (0 to 0) | NA                        |
| 20 | Malta            | Exposure to forces of nature                    | 0 (0 to 0) | 0 (0 to 0) | NA                        |
| 21 | Malta            | Falls                                           | 6 (4 to 8) | 7 (5 to 9) | 13.2% (9.2% to 17.7%)     |
| 22 | Malta            | Fire, heat, and hot substances                  | 0 (0 to 0) | 0 (0 to 0) | -3.5% (-8.2% to 1%)       |
| 23 | Malta            | Foreign body in eyes                            | 0 (0 to 0) | 0 (0 to 0) | 0% (0% to 0%)             |
| 24 | Malta            | Foreign body in other body part                 | 0 (0 to 0) | 0 (0 to 0) | 2% (-1.3% to 5.9%)        |
| 25 | Malta            | Motor vehicle road injuries                     | 0 (0 to 1) | 0 (0 to 0) | -24.6% (-33.6% to -15.3%) |
| 26 | Malta            | Motorcyclist road injuries                      | 0 (0 to 0) | 0 (0 to 0) | 4.6% (-11% to 24.1%)      |
| 27 | Malta            | Non-venomous animal contact                     | 0 (0 to 0) | 0 (0 to 0) | -18.3% (-21.3% to -15%)   |
| 28 | Malta            | Other exposure to mechanical forces             | 1 (0 to 1) | 0 (0 to 1) | -4.4% (-10.3% to 2.7%)    |
| 29 | Malta            | Other road injuries                             | 0 (0 to 0) | 0 (0 to 0) | -0.3% (-11% to 12.1%)     |
| 30 | Malta            | Other transport injuries                        | 0 (0 to 0) | 0 (0 to 0) | 3.3% (-1% to 7.9%)        |
| 31 | Malta            | Other unintentional injuries                    | 0 (0 to 0) | 0 (0 to 0) | -21.2% (-26.3% to -16.9%) |
| 32 | Malta            | Pedestrian road injuries                        | 0 (0 to 0) | 0 (0 to 0) | -23% (-34% to -11.7%)     |
| 33 | Malta            | Physical violence by firearm                    | 0 (0 to 0) | 0 (0 to 0) | 21.3% (12.3% to 32.8%)    |
| 34 | Malta            | Physical violence by other means                | 0 (0 to 0) | 0 (0 to 0) | -7.2% (-13.4% to -0.8%)   |
| 35 | Malta            | Physical violence by sharp object               | 0 (0 to 0) | 0 (0 to 0) | -6.3% (-14.3% to 2.7%)    |
| 36 | Malta            | Poisoning by carbon monoxide                    | 0 (0 to 0) | 0 (0 to 0) | 13.1% (3.3% to 22.8%)     |
| 37 | Malta            | Poisoning by other means                        | 0 (0 to 0) | 0 (0 to 0) | -1.6% (-8.7% to 4.9%)     |
| 38 | Malta            | Pulmonary aspiration and foreign body in airway | 0 (0 to 0) | 0 (0 to 0) | -12.1% (-19.5% to -4.6%)  |
| 39 | Malta            | Self-harm by firearm                            | 0 (0 to 0) | 0 (0 to 0) | 15.5% (3.4% to 27.1%)     |
| 40 | Malta            | Self-harm by other specified means              | 0 (0 to 0) | 0 (0 to 0) | 3.1% (-1.9% to 8.8%)      |
| 41 | Malta            | Unintentional firearm injuries                  | 0 (0 to 0) | 0 (0 to 0) | -5.3% (-13.7% to 3%)      |
| 42 | Malta            | Venomous animal contact                         | 0 (0 to 0) | 0 (0 to 0) | -18.3% (-23.5% to -12.8%) |
| 43 | Marshall Islands | Adverse effects of medical treatment            | 0 (0 to 0) | 0 (0 to 0) | 0% (0% to 0%)             |
| 44 | Marshall Islands | Conflict and terrorism                          | 0 (0 to 0) | 0 (0 to 0) | NA                        |
| 45 |                  |                                                 |            |            |                           |
| 46 |                  |                                                 |            |            |                           |

|    |                  |                                                 |            |            |                           |
|----|------------------|-------------------------------------------------|------------|------------|---------------------------|
| 1  |                  |                                                 |            |            |                           |
| 2  | Marshall Islands | Cyclist road injuries                           | 0 (0 to 0) | 0 (0 to 0) | 0.4% (-5.6% to 7.6%)      |
| 3  | Marshall Islands | Drowning                                        | 0 (0 to 0) | 0 (0 to 0) | 4.5% (-3.6% to 14.1%)     |
| 4  | Marshall Islands | Environmental heat and cold exposure            | 0 (0 to 0) | 0 (0 to 0) | -2.1% (-7.3% to 2.8%)     |
| 5  | Marshall Islands | Executions and police conflict                  | 0 (0 to 0) | 0 (0 to 0) | NA                        |
| 6  | Marshall Islands | Exposure to forces of nature                    | 0 (0 to 0) | 0 (0 to 0) | NA                        |
| 7  | Marshall Islands | Falls                                           | 1 (1 to 1) | 2 (1 to 2) | 37.9% (32.7% to 42.9%)    |
| 8  | Marshall Islands | Fire, heat, and hot substances                  | 0 (0 to 0) | 0 (0 to 0) | -0.7% (-5.5% to 4.6%)     |
| 9  | Marshall Islands | Foreign body in eyes                            | 0 (0 to 0) | 0 (0 to 0) | 0% (0% to 0%)             |
| 10 | Marshall Islands | Foreign body in other body part                 | 0 (0 to 0) | 0 (0 to 0) | -2.2% (-5.5% to 1.8%)     |
| 11 | Marshall Islands | Motor vehicle road injuries                     | 1 (0 to 1) | 1 (0 to 1) | -0.7% (-6.7% to 5.4%)     |
| 12 | Marshall Islands | Motorcyclist road injuries                      | 0 (0 to 0) | 0 (0 to 0) | -0.2% (-8.9% to 8.7%)     |
| 13 | Marshall Islands | Non-venomous animal contact                     | 0 (0 to 0) | 0 (0 to 0) | -14.6% (-18.2% to -10.7%) |
| 14 | Marshall Islands | Other exposure to mechanical forces             | 0 (0 to 0) | 0 (0 to 0) | -14% (-19.6% to -7.6%)    |
| 15 | Marshall Islands | Other road injuries                             | 0 (0 to 0) | 0 (0 to 0) | -0.4% (-8.6% to 8.9%)     |
| 16 | Marshall Islands | Other transport injuries                        | 0 (0 to 0) | 0 (0 to 0) | -2.8% (-7.2% to 1.6%)     |
| 17 | Marshall Islands | Other unintentional injuries                    | 0 (0 to 0) | 0 (0 to 0) | -3.6% (-7.6% to 0.8%)     |
| 18 | Marshall Islands | Pedestrian road injuries                        | 0 (0 to 0) | 0 (0 to 0) | -7.2% (-15% to 0.8%)      |
| 19 | Marshall Islands | Physical violence by firearm                    | 0 (0 to 0) | 0 (0 to 0) | -14.2% (-24% to -2.9%)    |
| 20 | Marshall Islands | Physical violence by other means                | 0 (0 to 1) | 0 (0 to 1) | -5.1% (-11.3% to 1.9%)    |
| 21 | Marshall Islands | Physical violence by sharp object               | 0 (0 to 0) | 0 (0 to 0) | -21.6% (-29.6% to -13%)   |
| 22 | Marshall Islands | Poisoning by carbon monoxide                    | 0 (0 to 0) | 0 (0 to 0) | 7.2% (-3.8% to 18.6%)     |
| 23 | Marshall Islands | Poisoning by other means                        | 0 (0 to 0) | 0 (0 to 0) | -15.6% (-22.3% to -8.3%)  |
| 24 | Marshall Islands | Pulmonary aspiration and foreign body in airway | 0 (0 to 0) | 0 (0 to 0) | 4.4% (-7% to 18.2%)       |
| 25 | Marshall Islands | Self-harm by firearm                            | 0 (0 to 0) | 0 (0 to 0) | -9.5% (-22.7% to 5.7%)    |
| 26 | Marshall Islands | Self-harm by other specified means              | 0 (0 to 1) | 0 (0 to 1) | 0% (-6.1% to 6.4%)        |
| 27 | Marshall Islands | Unintentional firearm injuries                  | 0 (0 to 0) | 0 (0 to 0) | -21.9% (-28% to -16.5%)   |
| 28 | Marshall Islands | Venomous animal contact                         | 0 (0 to 0) | 0 (0 to 0) | -8.6% (-14.3% to -1.7%)   |
| 29 | Mauritania       | Adverse effects of medical treatment            | 0 (0 to 0) | 0 (0 to 0) | 0% (0% to 0%)             |
| 30 | Mauritania       | Conflict and terrorism                          | 0 (0 to 1) | 0 (0 to 0) | NA                        |
| 31 | Mauritania       | Cyclist road injuries                           | 1 (1 to 2) | 1 (1 to 2) | -3.5% (-10.7% to 4.6%)    |
| 32 | Mauritania       | Drowning                                        | 0 (0 to 0) | 0 (0 to 0) | 12.4% (2.3% to 22.2%)     |
| 33 | Mauritania       | Environmental heat and cold exposure            | 0 (0 to 0) | 0 (0 to 0) | -6.9% (-11.7% to -2.1%)   |
| 34 | Mauritania       | Executions and police conflict                  | 0 (0 to 0) | 0 (0 to 0) | NA                        |
| 35 | Mauritania       | Exposure to forces of nature                    | 0 (0 to 0) | 0 (0 to 0) | NA                        |
| 36 | Mauritania       | Falls                                           | 3 (2 to 4) | 3 (2 to 5) | 18.9% (14.1% to 23.6%)    |
| 37 | Mauritania       | Fire, heat, and hot substances                  | 0 (0 to 0) | 0 (0 to 0) | -8.6% (-14% to -3.5%)     |
| 38 | Mauritania       | Foreign body in eyes                            | 0 (0 to 0) | 0 (0 to 0) | 0% (0% to 0%)             |
| 39 | Mauritania       | Foreign body in other body part                 | 1 (0 to 1) | 1 (0 to 1) | -1.3% (-5.2% to 2.5%)     |
| 40 | Mauritania       | Motor vehicle road injuries                     | 3 (1 to 5) | 3 (1 to 5) | -9.9% (-16.4% to -2.7%)   |
| 41 | Mauritania       | Motorcyclist road injuries                      | 1 (0 to 2) | 1 (0 to 2) | -18.4% (-25.3% to -11.2%) |
| 42 | Mauritania       | Non-venomous animal contact                     | 0 (0 to 0) | 0 (0 to 0) | -10.6% (-14.6% to -6.8%)  |
| 43 | Mauritania       | Other exposure to mechanical forces             | 0 (0 to 0) | 0 (0 to 0) | -14.7% (-19.8% to -9.6%)  |
| 44 | Mauritania       | Other road injuries                             | 0 (0 to 0) | 0 (0 to 0) | -5.3% (-13.8% to 4.8%)    |
| 45 |                  |                                                 |            |            |                           |
| 46 |                  |                                                 |            |            |                           |



|    |            |                                                 |            |            |                           |
|----|------------|-------------------------------------------------|------------|------------|---------------------------|
| 1  |            |                                                 |            |            |                           |
| 2  | Mauritania | Other transport injuries                        | 0 (0 to 1) | 0 (0 to 0) | -16.3% (-21.5% to -11.7%) |
| 3  | Mauritania | Other unintentional injuries                    | 0 (0 to 0) | 0 (0 to 0) | -17.3% (-21.7% to -12.1%) |
| 4  | Mauritania | Pedestrian road injuries                        | 3 (1 to 5) | 2 (1 to 4) | -20.7% (-26.2% to -15%)   |
| 5  | Mauritania | Physical violence by firearm                    | 0 (0 to 0) | 0 (0 to 0) | 45.7% (25.2% to 73%)      |
| 6  | Mauritania | Physical violence by other means                | 0 (0 to 0) | 0 (0 to 0) | 1.3% (-4.3% to 7%)        |
| 7  | Mauritania | Physical violence by sharp object               | 0 (0 to 0) | 0 (0 to 0) | 2.4% (-5.2% to 10.8%)     |
| 8  | Mauritania | Poisoning by carbon monoxide                    | 0 (0 to 0) | 0 (0 to 0) | 26.7% (13.8% to 41.5%)    |
| 9  | Mauritania | Poisoning by other means                        | 0 (0 to 0) | 0 (0 to 0) | -14.2% (-21.7% to -6.7%)  |
| 10 | Mauritania | Pulmonary aspiration and foreign body in airway | 0 (0 to 0) | 0 (0 to 0) | -1.9% (-9.3% to 6.2%)     |
| 11 | Mauritania | Self-harm by firearm                            | 0 (0 to 0) | 0 (0 to 0) | 5.5% (-4.5% to 18.4%)     |
| 12 | Mauritania | Self-harm by other specified means              | 0 (0 to 0) | 0 (0 to 0) | -6% (-11.3% to -0.7%)     |
| 13 | Mauritania | Unintentional firearm injuries                  | 0 (0 to 0) | 0 (0 to 0) | -17.5% (-25% to -9%)      |
| 14 | Mauritania | Venomous animal contact                         | 0 (0 to 0) | 0 (0 to 0) | -11% (-16.8% to -4.9%)    |
| 15 | Mauritius  | Adverse effects of medical treatment            | 0 (0 to 0) | 0 (0 to 0) | 0% (0% to 0%)             |
| 16 | Mauritius  | Conflict and terrorism                          | 0 (0 to 0) | 0 (0 to 0) | NA                        |
| 17 | Mauritius  | Cyclist road injuries                           | 0 (0 to 1) | 0 (0 to 1) | 8% (-5.9% to 24.9%)       |
| 18 | Mauritius  | Drowning                                        | 0 (0 to 0) | 0 (0 to 0) | 21.5% (12.2% to 31.7%)    |
| 19 | Mauritius  | Environmental heat and cold exposure            | 0 (0 to 0) | 0 (0 to 0) | -1.3% (-5.8% to 3.4%)     |
| 20 | Mauritius  | Executions and police conflict                  | 0 (0 to 0) | 0 (0 to 0) | NA                        |
| 21 | Mauritius  | Exposure to forces of nature                    | 0 (0 to 0) | 0 (0 to 0) | NA                        |
| 22 | Mauritius  | Falls                                           | 3 (2 to 4) | 5 (3 to 7) | 72.2% (64.8% to 80%)      |
| 23 | Mauritius  | Fire, heat, and hot substances                  | 0 (0 to 0) | 0 (0 to 0) | -55.1% (-59.9% to -50.4%) |
| 24 | Mauritius  | Foreign body in eyes                            | 0 (0 to 0) | 0 (0 to 0) | 0% (0% to 0%)             |
| 25 | Mauritius  | Foreign body in other body part                 | 0 (0 to 0) | 0 (0 to 0) | 1.9% (-2% to 5.5%)        |
| 26 | Mauritius  | Motor vehicle road injuries                     | 1 (1 to 2) | 1 (0 to 2) | -27.4% (-38.1% to -16.8%) |
| 27 | Mauritius  | Motorcyclist road injuries                      | 1 (1 to 2) | 2 (1 to 3) | 41.7% (24.2% to 68.4%)    |
| 28 | Mauritius  | Non-venomous animal contact                     | 0 (0 to 0) | 0 (0 to 0) | -19.9% (-23.1% to -16.4%) |
| 29 | Mauritius  | Other exposure to mechanical forces             | 0 (0 to 0) | 0 (0 to 0) | 4.4% (0% to 9.1%)         |
| 30 | Mauritius  | Other road injuries                             | 0 (0 to 0) | 0 (0 to 0) | 6.2% (-8.8% to 22.7%)     |
| 31 | Mauritius  | Other transport injuries                        | 0 (0 to 0) | 0 (0 to 0) | 19.1% (7.8% to 29.7%)     |
| 32 | Mauritius  | Other unintentional injuries                    | 0 (0 to 0) | 0 (0 to 0) | -4.6% (-11.7% to 1.8%)    |
| 33 | Mauritius  | Pedestrian road injuries                        | 1 (0 to 1) | 1 (0 to 1) | -27.5% (-37.1% to -17.9%) |
| 34 | Mauritius  | Physical violence by firearm                    | 0 (0 to 0) | 0 (0 to 0) | 41.4% (27.7% to 59.4%)    |
| 35 | Mauritius  | Physical violence by other means                | 0 (0 to 1) | 0 (0 to 1) | 9.7% (1.5% to 17.7%)      |
| 36 | Mauritius  | Physical violence by sharp object               | 0 (0 to 0) | 0 (0 to 0) | 33.8% (18.2% to 54.1%)    |
| 37 | Mauritius  | Poisoning by carbon monoxide                    | 0 (0 to 0) | 0 (0 to 0) | 55.2% (35.9% to 81.7%)    |
| 38 | Mauritius  | Poisoning by other means                        | 0 (0 to 0) | 0 (0 to 0) | -3.9% (-9.5% to 1.9%)     |
| 39 | Mauritius  | Pulmonary aspiration and foreign body in airway | 0 (0 to 0) | 0 (0 to 0) | -2.2% (-11.3% to 8.8%)    |
| 40 | Mauritius  | Self-harm by firearm                            | 0 (0 to 0) | 0 (0 to 0) | -1.9% (-16.6% to 18.8%)   |
| 41 | Mauritius  | Self-harm by other specified means              | 0 (0 to 0) | 0 (0 to 0) | -24% (-28.9% to -18.3%)   |
| 42 | Mauritius  | Unintentional firearm injuries                  | 0 (0 to 0) | 0 (0 to 0) | 5.2% (-1.3% to 12.6%)     |
| 43 | Mauritius  | Venomous animal contact                         | 0 (0 to 0) | 0 (0 to 0) | -18.1% (-23.8% to -11%)   |
| 44 | Mexico     | Adverse effects of medical treatment            | 0 (0 to 0) | 0 (0 to 0) | 0% (0% to 0%)             |
| 45 |            |                                                 |            |            |                           |
| 46 |            |                                                 |            |            |                           |

|    |                                  |                                                 |              |             |                           |
|----|----------------------------------|-------------------------------------------------|--------------|-------------|---------------------------|
| 1  |                                  |                                                 |              |             |                           |
| 2  | Mexico                           | Conflict and terrorism                          | 0 (0 to 0)   | 0 (0 to 0)  | NA                        |
| 3  | Mexico                           | Cyclist road injuries                           | 1 (0 to 1)   | 1 (0 to 1)  | -9% (-14.2% to -3.3%)     |
| 4  | Mexico                           | Drowning                                        | 0 (0 to 0)   | 0 (0 to 0)  | -39.9% (-44.5% to -35.3%) |
| 5  | Mexico                           | Environmental heat and cold exposure            | 0 (0 to 0)   | 0 (0 to 0)  | -37.5% (-43.3% to -31.6%) |
| 6  | Mexico                           | Executions and police conflict                  | 0 (0 to 0)   | 0 (0 to 0)  | NA                        |
| 7  | Mexico                           | Exposure to forces of nature                    | 0 (0 to 0)   | 0 (0 to 0)  | NA                        |
| 8  | Mexico                           | Falls                                           | 10 (7 to 15) | 8 (6 to 12) | -16.8% (-18.6% to -14.8%) |
| 9  | Mexico                           | Fire, heat, and hot substances                  | 0 (0 to 0)   | 0 (0 to 0)  | -23% (-27.3% to -19%)     |
| 10 | Mexico                           | Foreign body in eyes                            | 0 (0 to 0)   | 0 (0 to 0)  | 0% (0% to 0%)             |
| 11 | Mexico                           | Foreign body in other body part                 | 0 (0 to 0)   | 0 (0 to 0)  | -0.3% (-2% to 1.1%)       |
| 12 | Mexico                           | Motor vehicle road injuries                     | 1 (1 to 2)   | 1 (1 to 2)  | -1.5% (-5.8% to 3.6%)     |
| 13 | Mexico                           | Motorcyclist road injuries                      | 0 (0 to 1)   | 0 (0 to 1)  | 3.7% (-3.2% to 12.3%)     |
| 14 | Mexico                           | Non-venomous animal contact                     | 0 (0 to 1)   | 0 (0 to 1)  | -21.3% (-24.6% to -18.2%) |
| 15 | Mexico                           | Other exposure to mechanical forces             | 1 (0 to 1)   | 1 (0 to 1)  | -20.9% (-24.5% to -16.8%) |
| 16 | Mexico                           | Other road injuries                             | 0 (0 to 0)   | 0 (0 to 0)  | -7.1% (-12.8% to -1.3%)   |
| 17 | Mexico                           | Other transport injuries                        | 0 (0 to 0)   | 0 (0 to 0)  | -9.5% (-12.2% to -6.9%)   |
| 18 | Mexico                           | Other unintentional injuries                    | 0 (0 to 1)   | 0 (0 to 1)  | -30.3% (-34.6% to -26.1%) |
| 19 | Mexico                           | Pedestrian road injuries                        | 1 (1 to 2)   | 1 (0 to 1)  | -37.5% (-41.9% to -33.7%) |
| 20 | Mexico                           | Physical violence by firearm                    | 0 (0 to 0)   | 0 (0 to 0)  | 99.5% (80.5% to 123.1%)   |
| 21 | Mexico                           | Physical violence by other means                | 0 (0 to 1)   | 0 (0 to 1)  | -3.8% (-12% to 3.2%)      |
| 22 | Mexico                           | Physical violence by sharp object               | 0 (0 to 0)   | 0 (0 to 0)  | 20.9% (11.7% to 29.9%)    |
| 23 | Mexico                           | Poisoning by carbon monoxide                    | 0 (0 to 0)   | 0 (0 to 0)  | 1.7% (-15.7% to 14.7%)    |
| 24 | Mexico                           | Poisoning by other means                        | 0 (0 to 0)   | 0 (0 to 0)  | -9.5% (-17.2% to -1.9%)   |
| 25 | Mexico                           | Pulmonary aspiration and foreign body in airway | 0 (0 to 0)   | 0 (0 to 0)  | -40.2% (-44.4% to -36%)   |
| 26 | Mexico                           | Self-harm by firearm                            | 0 (0 to 0)   | 0 (0 to 0)  | 12.8% (-2.1% to 25.5%)    |
| 27 | Mexico                           | Self-harm by other specified means              | 0 (0 to 0)   | 0 (0 to 0)  | 90.7% (76.5% to 115.5%)   |
| 28 | Mexico                           | Unintentional firearm injuries                  | 0 (0 to 0)   | 0 (0 to 0)  | -43.2% (-48.6% to -38.5%) |
| 29 | Mexico                           | Venomous animal contact                         | 0 (0 to 0)   | 0 (0 to 0)  | -27% (-31.4% to -23.4%)   |
| 30 | Micronesia (Federated States of) | Adverse effects of medical treatment            | 0 (0 to 0)   | 0 (0 to 0)  | 0% (0% to 0%)             |
| 31 | Micronesia (Federated States of) | Conflict and terrorism                          | 0 (0 to 0)   | 0 (0 to 0)  | NA                        |
| 32 | Micronesia (Federated States of) | Cyclist road injuries                           | 0 (0 to 0)   | 0 (0 to 0)  | -4% (-11.2% to 3.7%)      |
| 33 | Micronesia (Federated States of) | Drowning                                        | 0 (0 to 0)   | 0 (0 to 0)  | 8.7% (-2.1% to 20.2%)     |
| 34 | Micronesia (Federated States of) | Environmental heat and cold exposure            | 0 (0 to 0)   | 0 (0 to 0)  | -5.2% (-11.2% to 0.7%)    |
| 35 | Micronesia (Federated States of) | Executions and police conflict                  | 0 (0 to 0)   | 0 (0 to 0)  | NA                        |
| 36 | Micronesia (Federated States of) | Exposure to forces of nature                    | 0 (0 to 0)   | 0 (0 to 0)  | NA                        |
| 37 | Micronesia (Federated States of) | Falls                                           | 1 (1 to 1)   | 2 (1 to 2)  | 57.1% (50.6% to 62.8%)    |
| 38 | Micronesia (Federated States of) | Fire, heat, and hot substances                  | 0 (0 to 0)   | 0 (0 to 0)  | -2% (-8.1% to 4.5%)       |
| 39 | Micronesia (Federated States of) | Foreign body in eyes                            | 0 (0 to 0)   | 0 (0 to 0)  | 0% (0% to 0%)             |
| 40 | Micronesia (Federated States of) | Foreign body in other body part                 | 0 (0 to 0)   | 0 (0 to 0)  | -3% (-6% to 0.5%)         |
| 41 | Micronesia (Federated States of) | Motor vehicle road injuries                     | 1 (0 to 1)   | 1 (0 to 1)  | -7% (-13% to -0.9%)       |
| 42 | Micronesia (Federated States of) | Motorcyclist road injuries                      | 0 (0 to 0)   | 0 (0 to 0)  | 6.3% (-4.3% to 17.9%)     |
| 43 | Micronesia (Federated States of) | Non-venomous animal contact                     | 0 (0 to 0)   | 0 (0 to 0)  | -12.2% (-16.5% to -8.5%)  |
| 44 | Micronesia (Federated States of) | Other exposure to mechanical forces             | 0 (0 to 0)   | 0 (0 to 0)  | -12.4% (-18.3% to -5.5%)  |
| 45 |                                  |                                                 |              |             |                           |
| 46 |                                  |                                                 |              |             |                           |

|    |                                  |                                                 |              |               |                          |
|----|----------------------------------|-------------------------------------------------|--------------|---------------|--------------------------|
| 1  |                                  |                                                 |              |               |                          |
| 2  | Micronesia (Federated States of) | Other road injuries                             | 0 (0 to 0)   | 0 (0 to 0)    | -7.6% (-16.7% to 2.2%)   |
| 3  | Micronesia (Federated States of) | Other transport injuries                        | 0 (0 to 0)   | 0 (0 to 0)    | -5.4% (-10% to -0.4%)    |
| 4  | Micronesia (Federated States of) | Other unintentional injuries                    | 0 (0 to 0)   | 0 (0 to 0)    | -8.1% (-12.2% to -3.7%)  |
| 5  | Micronesia (Federated States of) | Pedestrian road injuries                        | 0 (0 to 0)   | 0 (0 to 0)    | -12.3% (-20% to -4.2%)   |
| 6  | Micronesia (Federated States of) | Physical violence by firearm                    | 0 (0 to 0)   | 0 (0 to 0)    | -0.5% (-12.5% to 13.4%)  |
| 7  | Micronesia (Federated States of) | Physical violence by other means                | 0 (0 to 1)   | 0 (0 to 1)    | 1.9% (-4.7% to 9%)       |
| 8  | Micronesia (Federated States of) | Physical violence by sharp object               | 0 (0 to 0)   | 0 (0 to 0)    | -13.9% (-22.3% to -4.8%) |
| 9  | Micronesia (Federated States of) | Poisoning by carbon monoxide                    | 0 (0 to 0)   | 0 (0 to 0)    | 14.3% (3.5% to 26.2%)    |
| 10 | Micronesia (Federated States of) | Poisoning by other means                        | 0 (0 to 0)   | 0 (0 to 0)    | -18% (-25.1% to -10.5%)  |
| 11 | Micronesia (Federated States of) | Pulmonary aspiration and foreign body in airway | 0 (0 to 0)   | 0 (0 to 0)    | -4.1% (-15.2% to 7.7%)   |
| 12 | Micronesia (Federated States of) | Self-harm by firearm                            | 0 (0 to 0)   | 0 (0 to 0)    | -4% (-17.9% to 11.1%)    |
| 13 | Micronesia (Federated States of) | Self-harm by other specified means              | 0 (0 to 1)   | 0 (0 to 1)    | 0% (-5.7% to 6.4%)       |
| 14 | Micronesia (Federated States of) | Unintentional firearm injuries                  | 0 (0 to 0)   | 0 (0 to 0)    | -25.5% (-32.3% to -20%)  |
| 15 | Monaco                           | Venomous animal contact                         | 0 (0 to 0)   | 0 (0 to 0)    | -7.7% (-13% to -1.3%)    |
| 16 | Monaco                           | Adverse effects of medical treatment            | 0 (0 to 0)   | 0 (0 to 0)    | 0% (0% to 0%)            |
| 17 | Monaco                           | Conflict and terrorism                          | 0 (0 to 0)   | 0 (0 to 0)    | NA                       |
| 18 | Monaco                           | Cyclist road injuries                           | 1 (0 to 1)   | 1 (0 to 1)    | -16.6% (-23.6% to -8.6%) |
| 19 | Monaco                           | Drowning                                        | 0 (0 to 0)   | 0 (0 to 0)    | 86.5% (64.5% to 110.6%)  |
| 20 | Monaco                           | Environmental heat and cold exposure            | 0 (0 to 0)   | 0 (0 to 0)    | 1.3% (-3% to 5.7%)       |
| 21 | Monaco                           | Executions and police conflict                  | 0 (0 to 0)   | 0 (0 to 0)    | NA                       |
| 22 | Monaco                           | Exposure to forces of nature                    | 0 (0 to 0)   | 0 (0 to 0)    | NA                       |
| 23 | Monaco                           | Falls                                           | 12 (8 to 18) | 15 (10 to 21) | 20.3% (16.4% to 24.5%)   |
| 24 | Monaco                           | Fire, heat, and hot substances                  | 0 (0 to 0)   | 0 (0 to 0)    | 1% (-3% to 4.7%)         |
| 25 | Monaco                           | Foreign body in eyes                            | 0 (0 to 0)   | 0 (0 to 0)    | 0% (0% to 0%)            |
| 26 | Monaco                           | Foreign body in other body part                 | 0 (0 to 1)   | 0 (0 to 1)    | 1.6% (-1.9% to 4.8%)     |
| 27 | Monaco                           | Motor vehicle road injuries                     | 1 (0 to 2)   | 1 (0 to 1)    | -13.4% (-20.4% to -5.9%) |
| 28 | Monaco                           | Motorcyclist road injuries                      | 1 (0 to 1)   | 0 (0 to 1)    | -3.9% (-13.1% to 6.8%)   |
| 29 | Monaco                           | Non-venomous animal contact                     | 0 (0 to 0)   | 0 (0 to 0)    | -8.9% (-11.9% to -4.7%)  |
| 30 | Monaco                           | Other exposure to mechanical forces             | 1 (0 to 1)   | 1 (0 to 1)    | 3.1% (-2% to 8.5%)       |
| 31 | Monaco                           | Other road injuries                             | 0 (0 to 0)   | 0 (0 to 0)    | -16.7% (-24.2% to -8.6%) |
| 32 | Monaco                           | Other transport injuries                        | 0 (0 to 0)   | 0 (0 to 1)    | 10.5% (6.4% to 15.8%)    |
| 33 | Monaco                           | Other unintentional injuries                    | 1 (0 to 1)   | 1 (0 to 1)    | 0.7% (-2.6% to 4.7%)     |
| 34 | Monaco                           | Pedestrian road injuries                        | 0 (0 to 1)   | 0 (0 to 1)    | -24% (-31.6% to -16.3%)  |
| 35 | Monaco                           | Physical violence by firearm                    | 0 (0 to 0)   | 0 (0 to 0)    | 27.5% (18.2% to 39.2%)   |
| 36 | Monaco                           | Physical violence by other means                | 0 (0 to 0)   | 0 (0 to 0)    | 4.6% (-0.4% to 9.8%)     |
| 37 | Monaco                           | Physical violence by sharp object               | 0 (0 to 0)   | 0 (0 to 0)    | 3.7% (-4.3% to 12.3%)    |
| 38 | Monaco                           | Poisoning by carbon monoxide                    | 0 (0 to 0)   | 0 (0 to 0)    | -1.3% (-9.2% to 7.1%)    |
| 39 | Monaco                           | Poisoning by other means                        | 0 (0 to 0)   | 0 (0 to 0)    | -27.9% (-33.4% to -23%)  |
| 40 | Monaco                           | Pulmonary aspiration and foreign body in airway | 0 (0 to 0)   | 0 (0 to 0)    | -13.9% (-20.1% to -6.6%) |
| 41 | Monaco                           | Self-harm by firearm                            | 0 (0 to 0)   | 0 (0 to 0)    | -1.8% (-10.1% to 8.5%)   |
| 42 | Monaco                           | Self-harm by other specified means              | 0 (0 to 0)   | 0 (0 to 0)    | -6.4% (-10.8% to -1%)    |
| 43 | Monaco                           | Unintentional firearm injuries                  | 0 (0 to 0)   | 0 (0 to 0)    | 2.5% (-4.6% to 9.9%)     |
| 44 | Monaco                           | Venomous animal contact                         | 0 (0 to 0)   | 0 (0 to 0)    | -10.2% (-15.7% to -3.8%) |
| 45 |                                  |                                                 |              |               |                          |
| 46 |                                  |                                                 |              |               |                          |

|    |            |                                                 |            |            |                           |
|----|------------|-------------------------------------------------|------------|------------|---------------------------|
| 1  |            |                                                 |            |            |                           |
| 2  | Mongolia   | Adverse effects of medical treatment            | 0 (0 to 0) | 0 (0 to 0) | 0% (0% to 0%)             |
| 3  | Mongolia   | Conflict and terrorism                          | 0 (0 to 0) | 0 (0 to 0) | NA                        |
| 4  | Mongolia   | Cyclist road injuries                           | 0 (0 to 0) | 0 (0 to 0) | 7.4% (-1.9% to 16.5%)     |
| 5  | Mongolia   | Drowning                                        | 0 (0 to 0) | 0 (0 to 0) | 41.5% (24.8% to 61.4%)    |
| 6  | Mongolia   | Environmental heat and cold exposure            | 0 (0 to 0) | 0 (0 to 0) | -34.1% (-37.4% to -30.6%) |
| 7  | Mongolia   | Executions and police conflict                  | 0 (0 to 0) | 0 (0 to 0) | NA                        |
| 8  | Mongolia   | Exposure to forces of nature                    | 0 (0 to 1) | 0 (0 to 0) | NA                        |
| 9  | Mongolia   | Falls                                           | 3 (2 to 4) | 4 (3 to 5) | 32.9% (27.9% to 38.1%)    |
| 10 | Mongolia   | Fire, heat, and hot substances                  | 0 (0 to 0) | 0 (0 to 0) | 10% (4.2% to 15.9%)       |
| 11 | Mongolia   | Foreign body in eyes                            | 0 (0 to 0) | 0 (0 to 0) | 0% (0% to 0%)             |
| 12 | Mongolia   | Foreign body in other body part                 | 0 (0 to 0) | 0 (0 to 0) | 1.5% (-2.6% to 6.2%)      |
| 13 | Mongolia   | Motor vehicle road injuries                     | 1 (0 to 1) | 1 (1 to 2) | 53.7% (42.6% to 65.6%)    |
| 14 | Mongolia   | Motorcyclist road injuries                      | 0 (0 to 0) | 0 (0 to 0) | 13.5% (1.6% to 28.3%)     |
| 15 | Mongolia   | Non-venomous animal contact                     | 0 (0 to 0) | 0 (0 to 0) | -20.8% (-24.9% to -16.6%) |
| 16 | Mongolia   | Other exposure to mechanical forces             | 1 (0 to 1) | 1 (0 to 1) | 4.5% (-2% to 11.4%)       |
| 17 | Mongolia   | Other road injuries                             | 0 (0 to 0) | 0 (0 to 0) | 26.5% (13.9% to 43.3%)    |
| 18 | Mongolia   | Other transport injuries                        | 0 (0 to 0) | 0 (0 to 0) | 5.1% (0.6% to 9.6%)       |
| 19 | Mongolia   | Other unintentional injuries                    | 0 (0 to 0) | 0 (0 to 0) | 7% (1.9% to 12.2%)        |
| 20 | Mongolia   | Pedestrian road injuries                        | 0 (0 to 0) | 0 (0 to 0) | 17.6% (6.5% to 30.7%)     |
| 21 | Mongolia   | Physical violence by firearm                    | 0 (0 to 0) | 0 (0 to 0) | 63% (40.3% to 89.1%)      |
| 22 | Mongolia   | Physical violence by other means                | 0 (0 to 1) | 0 (0 to 0) | -15.4% (-22% to -8%)      |
| 23 | Mongolia   | Physical violence by sharp object               | 0 (0 to 0) | 0 (0 to 0) | -19.6% (-28.9% to -10.2%) |
| 24 | Mongolia   | Poisoning by carbon monoxide                    | 0 (0 to 0) | 0 (0 to 0) | -9.8% (-24.1% to 8.2%)    |
| 25 | Mongolia   | Poisoning by other means                        | 0 (0 to 0) | 0 (0 to 0) | -57% (-63.6% to -49.6%)   |
| 26 | Mongolia   | Pulmonary aspiration and foreign body in airway | 0 (0 to 0) | 0 (0 to 0) | 1.3% (-4.9% to 9.3%)      |
| 27 | Mongolia   | Self-harm by firearm                            | 0 (0 to 0) | 0 (0 to 0) | 21.5% (0.4% to 43.5%)     |
| 28 | Mongolia   | Self-harm by other specified means              | 0 (0 to 1) | 0 (0 to 1) | 6.3% (-0.3% to 13.5%)     |
| 29 | Mongolia   | Unintentional firearm injuries                  | 0 (0 to 0) | 0 (0 to 0) | -7.7% (-16.6% to 1.6%)    |
| 30 | Mongolia   | Venomous animal contact                         | 0 (0 to 0) | 0 (0 to 0) | -19% (-23.8% to -14%)     |
| 31 | Montenegro | Adverse effects of medical treatment            | 0 (0 to 0) | 0 (0 to 0) | 0% (0% to 0%)             |
| 32 | Montenegro | Conflict and terrorism                          | 0 (0 to 0) | 0 (0 to 0) | NA                        |
| 33 | Montenegro | Cyclist road injuries                           | 1 (0 to 1) | 1 (0 to 1) | -4.4% (-12.3% to 3.2%)    |
| 34 | Montenegro | Drowning                                        | 0 (0 to 0) | 0 (0 to 0) | 50.3% (32.9% to 67.5%)    |
| 35 | Montenegro | Environmental heat and cold exposure            | 0 (0 to 0) | 0 (0 to 0) | -14.8% (-19.7% to -10.2%) |
| 36 | Montenegro | Executions and police conflict                  | 0 (0 to 0) | 0 (0 to 0) | NA                        |
| 37 | Montenegro | Exposure to forces of nature                    | 0 (0 to 0) | 0 (0 to 0) | NA                        |
| 38 | Montenegro | Falls                                           | 6 (4 to 8) | 6 (5 to 8) | 5.5% (1.2% to 10.5%)      |
| 39 | Montenegro | Fire, heat, and hot substances                  | 0 (0 to 0) | 0 (0 to 0) | -8.4% (-12.7% to -3.7%)   |
| 40 | Montenegro | Foreign body in eyes                            | 0 (0 to 0) | 0 (0 to 0) | 0% (0% to 0%)             |
| 41 | Montenegro | Foreign body in other body part                 | 0 (0 to 0) | 0 (0 to 0) | -0.7% (-4.3% to 3%)       |
| 42 | Montenegro | Motor vehicle road injuries                     | 1 (1 to 2) | 1 (1 to 2) | 8.5% (0.4% to 18%)        |
| 43 | Montenegro | Motorcyclist road injuries                      | 0 (0 to 0) | 0 (0 to 0) | -5.2% (-16.3% to 6.9%)    |
| 44 | Montenegro | Non-venomous animal contact                     | 0 (0 to 0) | 0 (0 to 0) | -5.8% (-9.6% to -2.1%)    |
| 45 |            |                                                 |            |            |                           |
| 46 |            |                                                 |            |            |                           |

|    |            |                                                 |            |            |                           |
|----|------------|-------------------------------------------------|------------|------------|---------------------------|
| 1  |            |                                                 |            |            |                           |
| 2  | Montenegro | Other exposure to mechanical forces             | 1 (1 to 3) | 1 (1 to 3) | -1.7% (-6.8% to 3%)       |
| 3  | Montenegro | Other road injuries                             | 0 (0 to 0) | 0 (0 to 0) | -0.6% (-10% to 8.5%)      |
| 4  | Montenegro | Other transport injuries                        | 0 (0 to 0) | 0 (0 to 0) | -6.5% (-11.4% to -1.8%)   |
| 5  | Montenegro | Other unintentional injuries                    | 0 (0 to 1) | 0 (0 to 0) | -15.8% (-21.8% to -9.5%)  |
| 6  | Montenegro | Pedestrian road injuries                        | 1 (0 to 1) | 0 (0 to 1) | -13.3% (-20.9% to -5.4%)  |
| 7  | Montenegro | Physical violence by firearm                    | 0 (0 to 0) | 0 (0 to 0) | 8.6% (-2.1% to 21.4%)     |
| 8  | Montenegro | Physical violence by other means                | 1 (0 to 1) | 0 (0 to 1) | -23% (-28.8% to -16.8%)   |
| 9  | Montenegro | Physical violence by sharp object               | 0 (0 to 0) | 0 (0 to 0) | -8.1% (-17% to 2.1%)      |
| 10 | Montenegro | Poisoning by carbon monoxide                    | 0 (0 to 0) | 0 (0 to 0) | 19.9% (11.4% to 29.7%)    |
| 11 | Montenegro | Poisoning by other means                        | 0 (0 to 0) | 0 (0 to 0) | 2.1% (-4.9% to 9.9%)      |
| 12 | Montenegro | Pulmonary aspiration and foreign body in airway | 0 (0 to 0) | 0 (0 to 0) | -17.7% (-26.8% to -9.2%)  |
| 13 | Montenegro | Self-harm by firearm                            | 0 (0 to 0) | 0 (0 to 0) | 14.2% (3.2% to 29.4%)     |
| 14 | Montenegro | Self-harm by other specified means              | 0 (0 to 1) | 0 (0 to 1) | -1.9% (-7% to 3%)         |
| 15 | Montenegro | Unintentional firearm injuries                  | 0 (0 to 0) | 0 (0 to 0) | -2.1% (-10.3% to 6.5%)    |
| 16 | Morocco    | Venomous animal contact                         | 0 (0 to 0) | 0 (0 to 0) | -8.5% (-13.8% to -3.4%)   |
| 17 | Morocco    | Adverse effects of medical treatment            | 0 (0 to 0) | 0 (0 to 0) | 0% (0% to 0%)             |
| 18 | Morocco    | Conflict and terrorism                          | 0 (0 to 0) | 0 (0 to 0) | NA                        |
| 19 | Morocco    | Cyclist road injuries                           | 0 (0 to 0) | 0 (0 to 0) | 9% (-1.4% to 19.3%)       |
| 20 | Morocco    | Drowning                                        | 0 (0 to 0) | 0 (0 to 0) | 54.4% (34.4% to 75.4%)    |
| 21 | Morocco    | Environmental heat and cold exposure            | 0 (0 to 0) | 0 (0 to 0) | -2.7% (-6.9% to 1.4%)     |
| 22 | Morocco    | Executions and police conflict                  | 0 (0 to 0) | 0 (0 to 0) | NA                        |
| 23 | Morocco    | Exposure to forces of nature                    | 0 (0 to 0) | 0 (0 to 0) | NA                        |
| 24 | Morocco    | Falls                                           | 2 (1 to 2) | 2 (2 to 3) | 36.6% (31.5% to 42.2%)    |
| 25 | Morocco    | Fire, heat, and hot substances                  | 0 (0 to 0) | 0 (0 to 0) | -24.4% (-29.8% to -18.5%) |
| 26 | Morocco    | Foreign body in eyes                            | 0 (0 to 0) | 0 (0 to 0) | 0% (0% to 0%)             |
| 27 | Morocco    | Foreign body in other body part                 | 0 (0 to 0) | 0 (0 to 0) | -0.7% (-4.3% to 3.5%)     |
| 28 | Morocco    | Motor vehicle road injuries                     | 1 (0 to 1) | 1 (0 to 1) | -9.5% (-16.6% to -1.3%)   |
| 29 | Morocco    | Motorcyclist road injuries                      | 0 (0 to 0) | 0 (0 to 0) | -5.9% (-16.8% to 6.2%)    |
| 30 | Morocco    | Non-venomous animal contact                     | 0 (0 to 0) | 0 (0 to 0) | -10.9% (-14.6% to -6.6%)  |
| 31 | Morocco    | Other exposure to mechanical forces             | 0 (0 to 1) | 0 (0 to 1) | -5.4% (-11.3% to 0.9%)    |
| 32 | Morocco    | Other road injuries                             | 0 (0 to 0) | 0 (0 to 0) | 14.1% (3.5% to 26.2%)     |
| 33 | Morocco    | Other transport injuries                        | 0 (0 to 0) | 0 (0 to 0) | -5.2% (-9.7% to -0.3%)    |
| 34 | Morocco    | Other unintentional injuries                    | 0 (0 to 0) | 0 (0 to 0) | -21% (-25.1% to -17%)     |
| 35 | Morocco    | Pedestrian road injuries                        | 0 (0 to 1) | 0 (0 to 0) | -30.2% (-37.4% to -23%)   |
| 36 | Morocco    | Physical violence by firearm                    | 0 (0 to 0) | 0 (0 to 0) | 129.8% (98.5% to 173.6%)  |
| 37 | Morocco    | Physical violence by other means                | 0 (0 to 0) | 0 (0 to 0) | 1.2% (-7.7% to 9.9%)      |
| 38 | Morocco    | Physical violence by sharp object               | 0 (0 to 0) | 0 (0 to 0) | 2.7% (-8.2% to 13.8%)     |
| 39 | Morocco    | Poisoning by carbon monoxide                    | 0 (0 to 0) | 0 (0 to 0) | 37.9% (21.1% to 54.8%)    |
| 40 | Morocco    | Poisoning by other means                        | 0 (0 to 0) | 0 (0 to 0) | -22.5% (-30% to -14.5%)   |
| 41 | Morocco    | Pulmonary aspiration and foreign body in airway | 0 (0 to 0) | 0 (0 to 0) | -20.1% (-29% to -12.3%)   |
| 42 | Morocco    | Self-harm by firearm                            | 0 (0 to 0) | 0 (0 to 0) | 33% (19.6% to 49%)        |
| 43 | Morocco    | Self-harm by other specified means              | 0 (0 to 0) | 0 (0 to 0) | 2.2% (-2.8% to 7.7%)      |
| 44 | Morocco    | Unintentional firearm injuries                  | 0 (0 to 0) | 0 (0 to 0) | -16.4% (-23.6% to -10.1%) |
| 45 |            |                                                 |            |            |                           |
| 46 |            |                                                 |            |            |                           |

|    |            |                                                 |             |            |                           |
|----|------------|-------------------------------------------------|-------------|------------|---------------------------|
| 1  |            |                                                 |             |            |                           |
| 2  | Morocco    | Venomous animal contact                         | 0 (0 to 0)  | 0 (0 to 0) | -8.5% (-14.4% to -1.8%)   |
| 3  | Mozambique | Adverse effects of medical treatment            | 0 (0 to 0)  | 0 (0 to 0) | 0% (0% to 0%)             |
| 4  | Mozambique | Conflict and terrorism                          | 5 (1 to 16) | 0 (0 to 0) | NA                        |
| 5  | Mozambique | Cyclist road injuries                           | 2 (1 to 3)  | 2 (1 to 4) | 24.7% (15.7% to 34.7%)    |
| 6  | Mozambique | Drowning                                        | 0 (0 to 0)  | 0 (0 to 0) | -10.2% (-17% to -3.8%)    |
| 7  | Mozambique | Environmental heat and cold exposure            | 0 (0 to 0)  | 0 (0 to 0) | 0.1% (-6% to 7.2%)        |
| 8  | Mozambique | Executions and police conflict                  | 0 (0 to 0)  | 0 (0 to 0) | NA                        |
| 9  | Mozambique | Exposure to forces of nature                    | 0 (0 to 0)  | 1 (0 to 2) | NA                        |
| 10 | Mozambique | Falls                                           | 3 (2 to 5)  | 5 (3 to 7) | 34.1% (29.1% to 39.4%)    |
| 11 | Mozambique | Fire, heat, and hot substances                  | 0 (0 to 0)  | 0 (0 to 0) | -4.4% (-9.9% to 0.6%)     |
| 12 | Mozambique | Foreign body in eyes                            | 0 (0 to 0)  | 0 (0 to 0) | 0% (0% to 0%)             |
| 13 | Mozambique | Foreign body in other body part                 | 1 (0 to 1)  | 1 (0 to 1) | -6% (-9.6% to -1.7%)      |
| 14 | Mozambique | Motor vehicle road injuries                     | 1 (0 to 2)  | 1 (1 to 3) | 26.9% (15.1% to 39.4%)    |
| 15 | Mozambique | Motorcyclist road injuries                      | 1 (0 to 1)  | 1 (0 to 2) | 24.9% (15.4% to 36.6%)    |
| 16 | Mozambique | Non-venomous animal contact                     | 1 (0 to 1)  | 0 (0 to 1) | -16.7% (-21% to -12%)     |
| 17 | Mozambique | Other exposure to mechanical forces             | 0 (0 to 0)  | 0 (0 to 0) | -0.5% (-6.3% to 5.4%)     |
| 18 | Mozambique | Other road injuries                             | 0 (0 to 0)  | 0 (0 to 0) | 8.9% (0.8% to 18.6%)      |
| 19 | Mozambique | Other transport injuries                        | 0 (0 to 1)  | 0 (0 to 1) | -1.2% (-6.3% to 4.7%)     |
| 20 | Mozambique | Other unintentional injuries                    | 0 (0 to 0)  | 0 (0 to 0) | -9.7% (-15% to -4.5%)     |
| 21 | Mozambique | Pedestrian road injuries                        | 3 (1 to 6)  | 3 (2 to 6) | 13.9% (6.7% to 21.7%)     |
| 22 | Mozambique | Physical violence by firearm                    | 0 (0 to 0)  | 0 (0 to 0) | 67.9% (53.1% to 87%)      |
| 23 | Mozambique | Physical violence by other means                | 0 (0 to 0)  | 0 (0 to 0) | 48.6% (39.6% to 59%)      |
| 24 | Mozambique | Physical violence by sharp object               | 0 (0 to 0)  | 0 (0 to 0) | 42% (30.2% to 54.8%)      |
| 25 | Mozambique | Poisoning by carbon monoxide                    | 0 (0 to 0)  | 0 (0 to 0) | 23.9% (9.2% to 39.7%)     |
| 26 | Mozambique | Poisoning by other means                        | 0 (0 to 0)  | 0 (0 to 0) | -16.2% (-23.6% to -8%)    |
| 27 | Mozambique | Pulmonary aspiration and foreign body in airway | 0 (0 to 0)  | 0 (0 to 0) | -14.8% (-25.6% to -3.2%)  |
| 28 | Mozambique | Self-harm by firearm                            | 0 (0 to 0)  | 0 (0 to 0) | 83.9% (62.7% to 117.2%)   |
| 29 | Mozambique | Self-harm by other specified means              | 0 (0 to 0)  | 0 (0 to 0) | 49.6% (41.3% to 59.7%)    |
| 30 | Mozambique | Unintentional firearm injuries                  | 0 (0 to 0)  | 0 (0 to 0) | -17.4% (-25.6% to -10.1%) |
| 31 | Mozambique | Venomous animal contact                         | 0 (0 to 0)  | 0 (0 to 0) | -18.5% (-25.3% to -11.2%) |
| 32 | Myanmar    | Adverse effects of medical treatment            | 0 (0 to 0)  | 0 (0 to 0) | 0% (0% to 0%)             |
| 33 | Myanmar    | Conflict and terrorism                          | 1 (0 to 2)  | 1 (0 to 2) | NA                        |
| 34 | Myanmar    | Cyclist road injuries                           | 0 (0 to 0)  | 0 (0 to 0) | -21.7% (-28.4% to -14.2%) |
| 35 | Myanmar    | Drowning                                        | 0 (0 to 0)  | 0 (0 to 0) | -28.7% (-35.4% to -20.8%) |
| 36 | Myanmar    | Environmental heat and cold exposure            | 0 (0 to 0)  | 0 (0 to 0) | 4.6% (-0.9% to 9.6%)      |
| 37 | Myanmar    | Executions and police conflict                  | 0 (0 to 0)  | 0 (0 to 0) | NA                        |
| 38 | Myanmar    | Exposure to forces of nature                    | 0 (0 to 0)  | 0 (0 to 0) | NA                        |
| 39 | Myanmar    | Falls                                           | 2 (1 to 3)  | 3 (2 to 4) | 35.4% (30.2% to 40.5%)    |
| 40 | Myanmar    | Fire, heat, and hot substances                  | 0 (0 to 0)  | 0 (0 to 0) | -3.7% (-11.2% to 1.9%)    |
| 41 | Myanmar    | Foreign body in eyes                            | 0 (0 to 0)  | 0 (0 to 0) | 0% (0% to 0%)             |
| 42 | Myanmar    | Foreign body in other body part                 | 0 (0 to 0)  | 0 (0 to 0) | -5.2% (-8.9% to -1.8%)    |
| 43 | Myanmar    | Motor vehicle road injuries                     | 0 (0 to 1)  | 0 (0 to 0) | -30% (-36.2% to -23.4%)   |
| 44 | Myanmar    | Motorcyclist road injuries                      | 1 (0 to 1)  | 0 (0 to 1) | -19.4% (-26.4% to -11.4%) |
| 45 |            |                                                 |             |            |                           |
| 46 |            |                                                 |             |            |                           |

|    |         |                                                 |            |            |                           |
|----|---------|-------------------------------------------------|------------|------------|---------------------------|
| 1  |         |                                                 |            |            |                           |
| 2  | Myanmar | Non-venomous animal contact                     | 0 (0 to 0) | 0 (0 to 0) | -44.3% (-47.5% to -41%)   |
| 3  | Myanmar | Other exposure to mechanical forces             | 0 (0 to 0) | 0 (0 to 0) | -12.1% (-18.5% to -5.1%)  |
| 4  | Myanmar | Other road injuries                             | 0 (0 to 0) | 0 (0 to 0) | -16.2% (-24.6% to -6.8%)  |
| 5  | Myanmar | Other transport injuries                        | 0 (0 to 0) | 0 (0 to 0) | -23.5% (-30% to -17.5%)   |
| 6  | Myanmar | Other unintentional injuries                    | 0 (0 to 0) | 0 (0 to 0) | -26.4% (-31.5% to -21.2%) |
| 7  | Myanmar | Pedestrian road injuries                        | 0 (0 to 0) | 0 (0 to 0) | -45.7% (-50.7% to -40.2%) |
| 8  | Myanmar | Physical violence by firearm                    | 0 (0 to 0) | 0 (0 to 0) | -10.7% (-27% to 6.3%)     |
| 9  | Myanmar | Physical violence by other means                | 0 (0 to 0) | 0 (0 to 0) | -31.7% (-39.6% to -23.6%) |
| 10 | Myanmar | Physical violence by sharp object               | 0 (0 to 0) | 0 (0 to 0) | -45.9% (-53.5% to -38.4%) |
| 11 | Myanmar | Poisoning by carbon monoxide                    | 0 (0 to 0) | 0 (0 to 0) | 5.5% (-8.1% to 22.2%)     |
| 12 | Myanmar | Poisoning by other means                        | 0 (0 to 0) | 0 (0 to 0) | -40.6% (-46.6% to -35.2%) |
| 13 | Myanmar | Pulmonary aspiration and foreign body in airway | 0 (0 to 0) | 0 (0 to 0) | -39.9% (-46.2% to -33.6%) |
| 14 | Myanmar | Self-harm by firearm                            | 0 (0 to 0) | 0 (0 to 0) | -2.5% (-19.3% to 15.9%)   |
| 15 | Myanmar | Self-harm by other specified means              | 0 (0 to 0) | 0 (0 to 0) | -28.7% (-32.9% to -24.3%) |
| 16 | Myanmar | Unintentional firearm injuries                  | 0 (0 to 0) | 0 (0 to 0) | -27.6% (-36.3% to -20.7%) |
| 17 | Myanmar | Venomous animal contact                         | 0 (0 to 0) | 0 (0 to 0) | -57.9% (-62.7% to -53.1%) |
| 18 | Namibia | Adverse effects of medical treatment            | 0 (0 to 0) | 0 (0 to 0) | 0% (0% to 0%)             |
| 19 | Namibia | Conflict and terrorism                          | 0 (0 to 0) | 0 (0 to 0) | NA                        |
| 20 | Namibia | Cyclist road injuries                           | 0 (0 to 1) | 1 (0 to 1) | 40.5% (30.6% to 53.3%)    |
| 21 | Namibia | Drowning                                        | 0 (0 to 0) | 0 (0 to 0) | 14.9% (3.5% to 27.6%)     |
| 22 | Namibia | Environmental heat and cold exposure            | 0 (0 to 0) | 0 (0 to 0) | -14.2% (-19.2% to -9.3%)  |
| 23 | Namibia | Executions and police conflict                  | 0 (0 to 0) | 0 (0 to 0) | NA                        |
| 24 | Namibia | Exposure to forces of nature                    | 0 (0 to 0) | 0 (0 to 0) | NA                        |
| 25 | Namibia | Falls                                           | 2 (2 to 3) | 3 (2 to 4) | 27.5% (23.2% to 31.9%)    |
| 26 | Namibia | Fire, heat, and hot substances                  | 0 (0 to 0) | 0 (0 to 0) | -15.9% (-21.1% to -10.3%) |
| 27 | Namibia | Foreign body in eyes                            | 0 (0 to 0) | 0 (0 to 0) | 0% (0% to 0%)             |
| 28 | Namibia | Foreign body in other body part                 | 1 (1 to 1) | 1 (0 to 1) | -3.2% (-6.7% to 0.9%)     |
| 29 | Namibia | Motor vehicle road injuries                     | 1 (1 to 3) | 1 (1 to 3) | 7.1% (-1% to 16.4%)       |
| 30 | Namibia | Motorcyclist road injuries                      | 0 (0 to 1) | 0 (0 to 1) | 22% (10.1% to 35%)        |
| 31 | Namibia | Non-venomous animal contact                     | 0 (0 to 0) | 0 (0 to 0) | -22.4% (-26.8% to -18%)   |
| 32 | Namibia | Other exposure to mechanical forces             | 0 (0 to 1) | 0 (0 to 0) | -19.5% (-24.1% to -14.2%) |
| 33 | Namibia | Other road injuries                             | 0 (0 to 0) | 0 (0 to 0) | 34% (20.9% to 49.7%)      |
| 34 | Namibia | Other transport injuries                        | 0 (0 to 1) | 0 (0 to 1) | -6% (-11% to -1.2%)       |
| 35 | Namibia | Other unintentional injuries                    | 0 (0 to 0) | 0 (0 to 0) | -16.4% (-21.1% to -11.7%) |
| 36 | Namibia | Pedestrian road injuries                        | 2 (1 to 3) | 2 (1 to 3) | -2.5% (-9.2% to 4.3%)     |
| 37 | Namibia | Physical violence by firearm                    | 0 (0 to 0) | 0 (0 to 0) | 10.9% (-4.8% to 30.5%)    |
| 38 | Namibia | Physical violence by other means                | 0 (0 to 1) | 0 (0 to 1) | 0.1% (-6.6% to 7.1%)      |
| 39 | Namibia | Physical violence by sharp object               | 0 (0 to 0) | 0 (0 to 0) | 4.1% (-4.6% to 14.2%)     |
| 40 | Namibia | Poisoning by carbon monoxide                    | 0 (0 to 0) | 0 (0 to 0) | 25.3% (11.4% to 40.2%)    |
| 41 | Namibia | Poisoning by other means                        | 0 (0 to 0) | 0 (0 to 0) | -12.1% (-20.3% to -4.6%)  |
| 42 | Namibia | Pulmonary aspiration and foreign body in airway | 0 (0 to 0) | 0 (0 to 0) | -5.8% (-12.8% to 1.7%)    |
| 43 | Namibia | Self-harm by firearm                            | 0 (0 to 0) | 0 (0 to 0) | 63.2% (42.8% to 91.4%)    |
| 44 | Namibia | Self-harm by other specified means              | 0 (0 to 0) | 0 (0 to 0) | 25.4% (17.7% to 34%)      |
| 45 |         |                                                 |            |            |                           |
| 46 |         |                                                 |            |            |                           |

|    |         |                                                 |            |            |                           |
|----|---------|-------------------------------------------------|------------|------------|---------------------------|
| 1  |         |                                                 |            |            |                           |
| 2  | Namibia | Unintentional firearm injuries                  | 0 (0 to 0) | 0 (0 to 0) | -17.3% (-25.7% to -7.8%)  |
| 3  | Namibia | Venomous animal contact                         | 0 (0 to 0) | 0 (0 to 0) | -26.2% (-33.9% to -17.3%) |
| 4  | Nauru   | Adverse effects of medical treatment            | 0 (0 to 0) | 0 (0 to 0) | 0% (0% to 0%)             |
| 5  | Nauru   | Conflict and terrorism                          | 0 (0 to 0) | 0 (0 to 0) | NA                        |
| 6  | Nauru   | Cyclist road injuries                           | 0 (0 to 1) | 0 (0 to 1) | 2.3% (-3.7% to 9.8%)      |
| 7  | Nauru   | Drowning                                        | 0 (0 to 0) | 0 (0 to 0) | 35.7% (24.4% to 46.8%)    |
| 8  | Nauru   | Environmental heat and cold exposure            | 0 (0 to 0) | 0 (0 to 0) | -3.9% (-8.4% to 0.1%)     |
| 9  | Nauru   | Executions and police conflict                  | 0 (0 to 0) | 0 (0 to 0) | NA                        |
| 10 | Nauru   | Exposure to forces of nature                    | 0 (0 to 0) | 0 (0 to 0) | NA                        |
| 11 | Nauru   | Falls                                           | 3 (2 to 5) | 5 (3 to 7) | 46.7% (41.7% to 51.7%)    |
| 12 | Nauru   | Fire, heat, and hot substances                  | 0 (0 to 0) | 0 (0 to 0) | -2.9% (-7.3% to 1.9%)     |
| 13 | Nauru   | Foreign body in eyes                            | 0 (0 to 0) | 0 (0 to 0) | 0% (0% to 0%)             |
| 14 | Nauru   | Foreign body in other body part                 | 0 (0 to 0) | 0 (0 to 0) | -3% (-6.4% to 1.2%)       |
| 15 | Nauru   | Motor vehicle road injuries                     | 1 (1 to 2) | 1 (1 to 2) | -11.1% (-17.1% to -5.5%)  |
| 16 | Nauru   | Motorcyclist road injuries                      | 1 (0 to 2) | 1 (0 to 2) | -2.4% (-9.4% to 5.8%)     |
| 17 | Nauru   | Non-venomous animal contact                     | 0 (0 to 0) | 0 (0 to 0) | 3.4% (-0.8% to 7.8%)      |
| 18 | Nauru   | Other exposure to mechanical forces             | 0 (0 to 0) | 0 (0 to 0) | -15.6% (-20.1% to -11%)   |
| 19 | Nauru   | Other road injuries                             | 0 (0 to 0) | 0 (0 to 0) | -2.9% (-10.5% to 5.8%)    |
| 20 | Nauru   | Other transport injuries                        | 0 (0 to 1) | 0 (0 to 1) | -4.6% (-8.3% to -0.8%)    |
| 21 | Nauru   | Other unintentional injuries                    | 0 (0 to 0) | 0 (0 to 0) | 2.2% (-2% to 7%)          |
| 22 | Nauru   | Pedestrian road injuries                        | 1 (0 to 1) | 1 (0 to 1) | 0.8% (-6.5% to 9%)        |
| 23 | Nauru   | Physical violence by firearm                    | 0 (0 to 0) | 0 (0 to 0) | 0.3% (-11.5% to 11.5%)    |
| 24 | Nauru   | Physical violence by other means                | 1 (0 to 1) | 1 (0 to 1) | -1.5% (-7.1% to 4.1%)     |
| 25 | Nauru   | Physical violence by sharp object               | 0 (0 to 0) | 0 (0 to 0) | -15.2% (-23.7% to -6.5%)  |
| 26 | Nauru   | Poisoning by carbon monoxide                    | 0 (0 to 0) | 0 (0 to 0) | 9.3% (-0.5% to 19.2%)     |
| 27 | Nauru   | Poisoning by other means                        | 0 (0 to 0) | 0 (0 to 0) | -16.3% (-22.9% to -9.6%)  |
| 28 | Nauru   | Pulmonary aspiration and foreign body in airway | 0 (0 to 0) | 0 (0 to 0) | 7.5% (-2.7% to 17.6%)     |
| 29 | Nauru   | Self-harm by firearm                            | 0 (0 to 0) | 0 (0 to 0) | -5.1% (-19.8% to 8.4%)    |
| 30 | Nauru   | Self-harm by other specified means              | 0 (0 to 0) | 0 (0 to 0) | 0.2% (-5.6% to 7%)        |
| 31 | Nauru   | Unintentional firearm injuries                  | 0 (0 to 0) | 0 (0 to 0) | -15.4% (-23.2% to -9%)    |
| 32 | Nauru   | Venomous animal contact                         | 0 (0 to 0) | 0 (0 to 0) | 5% (-2.2% to 12.9%)       |
| 33 | Nepal   | Adverse effects of medical treatment            | 0 (0 to 0) | 0 (0 to 0) | 0% (0% to 0%)             |
| 34 | Nepal   | Conflict and terrorism                          | 0 (0 to 0) | 0 (0 to 0) | NA                        |
| 35 | Nepal   | Cyclist road injuries                           | 1 (0 to 1) | 1 (0 to 1) | -2.2% (-9.5% to 4.7%)     |
| 36 | Nepal   | Drowning                                        | 0 (0 to 0) | 0 (0 to 0) | -4.6% (-14.4% to 6.5%)    |
| 37 | Nepal   | Environmental heat and cold exposure            | 0 (0 to 0) | 0 (0 to 0) | -13.2% (-18.8% to -7.9%)  |
| 38 | Nepal   | Executions and police conflict                  | 0 (0 to 0) | 0 (0 to 0) | NA                        |
| 39 | Nepal   | Exposure to forces of nature                    | 0 (0 to 0) | 0 (0 to 0) | NA                        |
| 40 | Nepal   | Falls                                           | 3 (2 to 4) | 3 (3 to 5) | 24.2% (19.7% to 28.5%)    |
| 41 | Nepal   | Fire, heat, and hot substances                  | 0 (0 to 0) | 0 (0 to 0) | 11.5% (4.5% to 19.6%)     |
| 42 | Nepal   | Foreign body in eyes                            | 0 (0 to 0) | 0 (0 to 0) | 0% (0% to 0%)             |
| 43 | Nepal   | Foreign body in other body part                 | 0 (0 to 0) | 0 (0 to 0) | -6.5% (-9.9% to -2.9%)    |
| 44 | Nepal   | Motor vehicle road injuries                     | 0 (0 to 1) | 0 (0 to 1) | 15.6% (6.1% to 25.2%)     |
| 45 |         |                                                 |            |            |                           |
| 46 |         |                                                 |            |            |                           |



|    |             |                                                 |            |            |                           |
|----|-------------|-------------------------------------------------|------------|------------|---------------------------|
| 1  |             |                                                 |            |            |                           |
| 2  | Nepal       | Motorcyclist road injuries                      | 0 (0 to 1) | 0 (0 to 1) | 18% (7.6% to 28.8%)       |
| 3  | Nepal       | Non-venomous animal contact                     | 0 (0 to 1) | 0 (0 to 1) | -15.4% (-20.4% to -10.6%) |
| 4  | Nepal       | Other exposure to mechanical forces             | 0 (0 to 0) | 0 (0 to 0) | 4.3% (-2.2% to 10.7%)     |
| 5  | Nepal       | Other road injuries                             | 0 (0 to 0) | 0 (0 to 0) | 2.8% (-5.2% to 11.5%)     |
| 6  | Nepal       | Other transport injuries                        | 0 (0 to 0) | 0 (0 to 0) | 0.1% (-4.8% to 5.1%)      |
| 7  | Nepal       | Other unintentional injuries                    | 0 (0 to 0) | 0 (0 to 0) | -18.4% (-22.5% to -14%)   |
| 8  | Nepal       | Pedestrian road injuries                        | 0 (0 to 0) | 0 (0 to 0) | -2.2% (-10.4% to 5.8%)    |
| 9  | Nepal       | Physical violence by firearm                    | 0 (0 to 0) | 0 (0 to 0) | 58.5% (35.8% to 86.8%)    |
| 10 | Nepal       | Physical violence by other means                | 0 (0 to 1) | 0 (0 to 1) | 21.4% (14.6% to 28.3%)    |
| 11 | Nepal       | Physical violence by sharp object               | 0 (0 to 0) | 0 (0 to 0) | 8.5% (-0.8% to 18.4%)     |
| 12 | Nepal       | Poisoning by carbon monoxide                    | 0 (0 to 0) | 0 (0 to 0) | -5.7% (-17.8% to 6.9%)    |
| 13 | Nepal       | Poisoning by other means                        | 0 (0 to 0) | 0 (0 to 0) | -31.2% (-38.3% to -23.2%) |
| 14 | Nepal       | Pulmonary aspiration and foreign body in airway | 0 (0 to 0) | 0 (0 to 0) | -24.5% (-31.1% to -17.6%) |
| 15 | Nepal       | Self-harm by firearm                            | 0 (0 to 0) | 0 (0 to 0) | 25.9% (9.2% to 44%)       |
| 16 | Nepal       | Self-harm by other specified means              | 0 (0 to 0) | 0 (0 to 0) | 2.7% (-3.7% to 9.1%)      |
| 17 | Nepal       | Unintentional firearm injuries                  | 0 (0 to 0) | 0 (0 to 0) | -8.8% (-16.2% to -2.3%)   |
| 18 | Nepal       | Venomous animal contact                         | 0 (0 to 0) | 0 (0 to 0) | -7.5% (-17.9% to 1.5%)    |
| 19 | Netherlands | Adverse effects of medical treatment            | 0 (0 to 0) | 0 (0 to 0) | 0% (0% to 0%)             |
| 20 | Netherlands | Conflict and terrorism                          | 0 (0 to 0) | 0 (0 to 0) | NA                        |
| 21 | Netherlands | Cyclist road injuries                           | 0 (0 to 1) | 0 (0 to 0) | -45.8% (-53.8% to -37.3%) |
| 22 | Netherlands | Drowning                                        | 0 (0 to 0) | 0 (0 to 0) | 58% (43% to 75.8%)        |
| 23 | Netherlands | Environmental heat and cold exposure            | 0 (0 to 0) | 0 (0 to 0) | -5.2% (-10.1% to -0.3%)   |
| 24 | Netherlands | Executions and police conflict                  | 0 (0 to 0) | 0 (0 to 0) | NA                        |
| 25 | Netherlands | Exposure to forces of nature                    | 0 (0 to 0) | 0 (0 to 0) | NA                        |
| 26 | Netherlands | Falls                                           | 5 (3 to 6) | 7 (5 to 9) | 45.5% (38.9% to 53.2%)    |
| 27 | Netherlands | Fire, heat, and hot substances                  | 0 (0 to 0) | 0 (0 to 0) | -2.4% (-7.1% to 2.3%)     |
| 28 | Netherlands | Foreign body in eyes                            | 0 (0 to 0) | 0 (0 to 0) | 0% (0% to 0%)             |
| 29 | Netherlands | Foreign body in other body part                 | 0 (0 to 0) | 0 (0 to 0) | 1.1% (-2.1% to 5.9%)      |
| 30 | Netherlands | Motor vehicle road injuries                     | 0 (0 to 1) | 0 (0 to 0) | -33.8% (-43.6% to -22.8%) |
| 31 | Netherlands | Motorcyclist road injuries                      | 0 (0 to 0) | 0 (0 to 0) | -34.6% (-47.1% to -19.8%) |
| 32 | Netherlands | Non-venomous animal contact                     | 0 (0 to 0) | 0 (0 to 0) | -11.4% (-14.7% to -7.1%)  |
| 33 | Netherlands | Other exposure to mechanical forces             | 0 (0 to 1) | 0 (0 to 1) | -2.5% (-8.5% to 2.9%)     |
| 34 | Netherlands | Other road injuries                             | 0 (0 to 0) | 0 (0 to 0) | -6% (-19.5% to 10.4%)     |
| 35 | Netherlands | Other transport injuries                        | 0 (0 to 0) | 0 (0 to 0) | 5.8% (1.3% to 10.3%)      |
| 36 | Netherlands | Other unintentional injuries                    | 0 (0 to 0) | 0 (0 to 0) | -5% (-9.7% to -0.2%)      |
| 37 | Netherlands | Pedestrian road injuries                        | 0 (0 to 0) | 0 (0 to 0) | -5.8% (-20.3% to 11.7%)   |
| 38 | Netherlands | Physical violence by firearm                    | 0 (0 to 0) | 0 (0 to 0) | 12.4% (2.5% to 24.8%)     |
| 39 | Netherlands | Physical violence by other means                | 0 (0 to 0) | 0 (0 to 0) | -12.2% (-20% to -4.3%)    |
| 40 | Netherlands | Physical violence by sharp object               | 0 (0 to 0) | 0 (0 to 0) | -27.6% (-36.9% to -19.6%) |
| 41 | Netherlands | Poisoning by carbon monoxide                    | 0 (0 to 0) | 0 (0 to 0) | 12.2% (3.7% to 21%)       |
| 42 | Netherlands | Poisoning by other means                        | 0 (0 to 0) | 0 (0 to 0) | -5.1% (-11.1% to 1.6%)    |
| 43 | Netherlands | Pulmonary aspiration and foreign body in airway | 0 (0 to 0) | 0 (0 to 0) | -8.3% (-15.6% to -2.3%)   |
| 44 | Netherlands | Self-harm by firearm                            | 0 (0 to 0) | 0 (0 to 0) | 13.1% (0.8% to 29.1%)     |

|    |             |                                                 |             |             |                           |
|----|-------------|-------------------------------------------------|-------------|-------------|---------------------------|
| 1  |             |                                                 |             |             |                           |
| 2  | Netherlands | Self-harm by other specified means              | 0 (0 to 1)  | 0 (0 to 1)  | -9.4% (-13.3% to -4.4%)   |
| 3  | Netherlands | Unintentional firearm injuries                  | 0 (0 to 0)  | 0 (0 to 0)  | 5.1% (-2.7% to 13.5%)     |
| 4  | Netherlands | Venomous animal contact                         | 0 (0 to 0)  | 0 (0 to 0)  | -10.9% (-16.7% to -4.9%)  |
| 5  | New Zealand | Adverse effects of medical treatment            | 0 (0 to 0)  | 0 (0 to 0)  | 0% (0% to 0%)             |
| 6  | New Zealand | Conflict and terrorism                          | 0 (0 to 0)  | 0 (0 to 0)  | NA                        |
| 7  | New Zealand | Cyclist road injuries                           | 0 (0 to 0)  | 0 (0 to 0)  | -21.5% (-32.1% to -9.6%)  |
| 8  | New Zealand | Drowning                                        | 0 (0 to 0)  | 0 (0 to 0)  | -33.5% (-39.1% to -27.7%) |
| 9  | New Zealand | Environmental heat and cold exposure            | 0 (0 to 0)  | 0 (0 to 0)  | -35.9% (-43.3% to -27.5%) |
| 10 | New Zealand | Executions and police conflict                  | 0 (0 to 0)  | 0 (0 to 0)  | NA                        |
| 11 | New Zealand | Exposure to forces of nature                    | 0 (0 to 0)  | 0 (0 to 0)  | NA                        |
| 12 | New Zealand | Falls                                           | 7 (5 to 10) | 9 (6 to 12) | 19.9% (13.3% to 28%)      |
| 13 | New Zealand | Fire, heat, and hot substances                  | 0 (0 to 0)  | 0 (0 to 0)  | -12% (-17.3% to -4.7%)    |
| 14 | New Zealand | Foreign body in eyes                            | 0 (0 to 0)  | 0 (0 to 0)  | 0% (0% to 0%)             |
| 15 | New Zealand | Foreign body in other body part                 | 1 (1 to 1)  | 1 (1 to 1)  | -4.8% (-11.1% to 2.8%)    |
| 16 | New Zealand | Motor vehicle road injuries                     | 1 (0 to 2)  | 1 (0 to 1)  | -11.5% (-21.3% to 1.1%)   |
| 17 | New Zealand | Motorcyclist road injuries                      | 0 (0 to 0)  | 0 (0 to 0)  | -27.7% (-40.6% to -13%)   |
| 18 | New Zealand | Non-venomous animal contact                     | 0 (0 to 1)  | 0 (0 to 1)  | -14% (-25.8% to -0.5%)    |
| 19 | New Zealand | Other exposure to mechanical forces             | 2 (1 to 5)  | 2 (1 to 4)  | -8.7% (-14.9% to -0.9%)   |
| 20 | New Zealand | Other road injuries                             | 0 (0 to 0)  | 0 (0 to 0)  | -34.3% (-43.1% to -23.2%) |
| 21 | New Zealand | Other transport injuries                        | 0 (0 to 0)  | 0 (0 to 0)  | -16.7% (-28% to -5.2%)    |
| 22 | New Zealand | Other unintentional injuries                    | 1 (1 to 1)  | 1 (1 to 1)  | -3% (-9.9% to 4.7%)       |
| 23 | New Zealand | Pedestrian road injuries                        | 0 (0 to 0)  | 0 (0 to 0)  | -17.3% (-28.5% to -4.4%)  |
| 24 | New Zealand | Physical violence by firearm                    | 0 (0 to 0)  | 0 (0 to 0)  | -15.5% (-25.2% to -3.6%)  |
| 25 | New Zealand | Physical violence by other means                | 1 (0 to 1)  | 1 (0 to 1)  | 8.6% (-1.5% to 22.3%)     |
| 26 | New Zealand | Physical violence by sharp object               | 0 (0 to 0)  | 0 (0 to 0)  | -31.8% (-40.8% to -21.3%) |
| 27 | New Zealand | Poisoning by carbon monoxide                    | 0 (0 to 0)  | 0 (0 to 0)  | -5.7% (-20.7% to 14.3%)   |
| 28 | New Zealand | Poisoning by other means                        | 0 (0 to 0)  | 0 (0 to 0)  | -19.3% (-26.8% to -9.7%)  |
| 29 | New Zealand | Pulmonary aspiration and foreign body in airway | 0 (0 to 0)  | 0 (0 to 0)  | 16.3% (4.2% to 31.3%)     |
| 30 | New Zealand | Self-harm by firearm                            | 0 (0 to 0)  | 0 (0 to 0)  | -73.2% (-79.3% to -66.7%) |
| 31 | New Zealand | Self-harm by other specified means              | 0 (0 to 1)  | 0 (0 to 1)  | -23.7% (-29.8% to -18.3%) |
| 32 | New Zealand | Unintentional firearm injuries                  | 0 (0 to 0)  | 0 (0 to 0)  | -40.1% (-52.1% to -23%)   |
| 33 | New Zealand | Venomous animal contact                         | 0 (0 to 0)  | 0 (0 to 0)  | -22.1% (-37.8% to -1.6%)  |
| 34 | Nicaragua   | Adverse effects of medical treatment            | 0 (0 to 0)  | 0 (0 to 0)  | 0% (0% to 0%)             |
| 35 | Nicaragua   | Conflict and terrorism                          | 1 (0 to 3)  | 0 (0 to 0)  | NA                        |
| 36 | Nicaragua   | Cyclist road injuries                           | 0 (0 to 0)  | 0 (0 to 0)  | -13.6% (-22.2% to -2.6%)  |
| 37 | Nicaragua   | Drowning                                        | 0 (0 to 0)  | 0 (0 to 0)  | 37.5% (18.9% to 59.4%)    |
| 38 | Nicaragua   | Environmental heat and cold exposure            | 0 (0 to 0)  | 0 (0 to 0)  | 3.2% (-0.8% to 7.9%)      |
| 39 | Nicaragua   | Executions and police conflict                  | 0 (0 to 0)  | 0 (0 to 0)  | NA                        |
| 40 | Nicaragua   | Exposure to forces of nature                    | 0 (0 to 0)  | 0 (0 to 0)  | NA                        |
| 41 | Nicaragua   | Falls                                           | 2 (1 to 2)  | 2 (1 to 3)  | 27.8% (22.7% to 32.7%)    |
| 42 | Nicaragua   | Fire, heat, and hot substances                  | 0 (0 to 0)  | 0 (0 to 0)  | -3.3% (-10% to 4.3%)      |
| 43 | Nicaragua   | Foreign body in eyes                            | 0 (0 to 0)  | 0 (0 to 0)  | 0% (0% to 0%)             |
| 44 | Nicaragua   | Foreign body in other body part                 | 0 (0 to 0)  | 0 (0 to 0)  | -1.4% (-5.5% to 2.4%)     |
| 45 |             |                                                 |             |             |                           |
| 46 |             |                                                 |             |             |                           |

|    |           |                                                 |            |            |                           |
|----|-----------|-------------------------------------------------|------------|------------|---------------------------|
| 1  |           |                                                 |            |            |                           |
| 2  | Nicaragua | Motor vehicle road injuries                     | 1 (0 to 1) | 0 (0 to 1) | -15.4% (-22.7% to -7.3%)  |
| 3  | Nicaragua | Motorcyclist road injuries                      | 0 (0 to 0) | 0 (0 to 0) | 56% (39.2% to 76.3%)      |
| 4  | Nicaragua | Non-venomous animal contact                     | 0 (0 to 0) | 0 (0 to 0) | -10% (-14.4% to -5.5%)    |
| 5  | Nicaragua | Other exposure to mechanical forces             | 0 (0 to 1) | 0 (0 to 1) | -6.1% (-15% to 3.3%)      |
| 6  | Nicaragua | Other road injuries                             | 0 (0 to 0) | 0 (0 to 0) | -16.1% (-25.4% to -6.3%)  |
| 7  | Nicaragua | Other transport injuries                        | 0 (0 to 0) | 0 (0 to 0) | 1.9% (-2.6% to 6.3%)      |
| 8  | Nicaragua | Other unintentional injuries                    | 0 (0 to 0) | 0 (0 to 0) | -27.5% (-33.4% to -21.3%) |
| 9  | Nicaragua | Pedestrian road injuries                        | 0 (0 to 1) | 0 (0 to 0) | -40.5% (-47.2% to -33.4%) |
| 10 | Nicaragua | Physical violence by firearm                    | 0 (0 to 0) | 0 (0 to 0) | 42.7% (23.9% to 68.7%)    |
| 11 | Nicaragua | Physical violence by other means                | 0 (0 to 0) | 0 (0 to 0) | -20.5% (-29.6% to -10.7%) |
| 12 | Nicaragua | Physical violence by sharp object               | 0 (0 to 0) | 0 (0 to 0) | -23.8% (-32.8% to -14.7%) |
| 13 | Nicaragua | Poisoning by carbon monoxide                    | 0 (0 to 0) | 0 (0 to 0) | 36.3% (21.1% to 53%)      |
| 14 | Nicaragua | Poisoning by other means                        | 0 (0 to 0) | 0 (0 to 0) | -9.2% (-17% to -0.6%)     |
| 15 | Nicaragua | Pulmonary aspiration and foreign body in airway | 0 (0 to 0) | 0 (0 to 0) | -33.3% (-41.7% to -25.2%) |
| 16 | Nicaragua | Self-harm by firearm                            | 0 (0 to 0) | 0 (0 to 0) | 10.5% (-2.2% to 26%)      |
| 17 | Nicaragua | Self-harm by other specified means              | 0 (0 to 0) | 0 (0 to 0) | 1.2% (-5.5% to 8.8%)      |
| 18 | Nicaragua | Unintentional firearm injuries                  | 0 (0 to 0) | 0 (0 to 0) | -25.7% (-36.1% to -17.3%) |
| 19 | Nicaragua | Venomous animal contact                         | 0 (0 to 0) | 0 (0 to 0) | -8.3% (-13% to -2.8%)     |
| 20 | Niger     | Adverse effects of medical treatment            | 0 (0 to 0) | 0 (0 to 0) | 0% (0% to 0%)             |
| 21 | Niger     | Conflict and terrorism                          | 1 (0 to 2) | 1 (0 to 2) | NA                        |
| 22 | Niger     | Cyclist road injuries                           | 1 (0 to 2) | 1 (1 to 2) | 14.3% (7.4% to 21.8%)     |
| 23 | Niger     | Drowning                                        | 0 (0 to 0) | 0 (0 to 0) | -11.4% (-18.2% to -4.1%)  |
| 24 | Niger     | Environmental heat and cold exposure            | 0 (0 to 0) | 0 (0 to 0) | -3.8% (-9.2% to 1.7%)     |
| 25 | Niger     | Executions and police conflict                  | 0 (0 to 0) | 0 (0 to 0) | NA                        |
| 26 | Niger     | Exposure to forces of nature                    | 0 (0 to 0) | 0 (0 to 0) | NA                        |
| 27 | Niger     | Falls                                           | 3 (2 to 4) | 3 (2 to 5) | 17.3% (13% to 22%)        |
| 28 | Niger     | Fire, heat, and hot substances                  | 0 (0 to 0) | 0 (0 to 0) | -11.2% (-17.2% to -5.8%)  |
| 29 | Niger     | Foreign body in eyes                            | 0 (0 to 0) | 0 (0 to 0) | 0% (0% to 0%)             |
| 30 | Niger     | Foreign body in other body part                 | 1 (0 to 1) | 1 (0 to 1) | 0% (-3.6% to 3.4%)        |
| 31 | Niger     | Motor vehicle road injuries                     | 1 (1 to 3) | 1 (1 to 3) | 6.4% (-1% to 14.3%)       |
| 32 | Niger     | Motorcyclist road injuries                      | 1 (0 to 1) | 1 (0 to 1) | -8.8% (-15.5% to -0.9%)   |
| 33 | Niger     | Non-venomous animal contact                     | 0 (0 to 1) | 0 (0 to 0) | -8% (-12.3% to -4.3%)     |
| 34 | Niger     | Other exposure to mechanical forces             | 0 (0 to 0) | 0 (0 to 0) | -10.7% (-15.3% to -5.7%)  |
| 35 | Niger     | Other road injuries                             | 0 (0 to 0) | 0 (0 to 0) | 12.4% (3% to 22.3%)       |
| 36 | Niger     | Other transport injuries                        | 0 (0 to 1) | 0 (0 to 1) | -11.3% (-15.9% to -7.3%)  |
| 37 | Niger     | Other unintentional injuries                    | 0 (0 to 0) | 0 (0 to 0) | -13% (-17% to -9%)        |
| 38 | Niger     | Pedestrian road injuries                        | 2 (1 to 3) | 2 (1 to 3) | -1.6% (-8.4% to 5.6%)     |
| 39 | Niger     | Physical violence by firearm                    | 0 (0 to 0) | 0 (0 to 0) | 9.7% (-1.3% to 24.8%)     |
| 40 | Niger     | Physical violence by other means                | 0 (0 to 0) | 0 (0 to 0) | -5.1% (-10.2% to 0.2%)    |
| 41 | Niger     | Physical violence by sharp object               | 0 (0 to 0) | 0 (0 to 0) | -6.3% (-12.7% to 0.4%)    |
| 42 | Niger     | Poisoning by carbon monoxide                    | 0 (0 to 0) | 0 (0 to 0) | 16.6% (2.7% to 31.1%)     |
| 43 | Niger     | Poisoning by other means                        | 0 (0 to 0) | 0 (0 to 0) | -22.4% (-29.7% to -14.2%) |
| 44 | Niger     | Pulmonary aspiration and foreign body in airway | 0 (0 to 0) | 0 (0 to 0) | -11.5% (-20.3% to -2%)    |
| 45 |           |                                                 |            |            |                           |
| 46 |           |                                                 |            |            |                           |

|    |         |                                                 |            |            |                           |
|----|---------|-------------------------------------------------|------------|------------|---------------------------|
| 1  |         |                                                 |            |            |                           |
| 2  | Niger   | Self-harm by firearm                            | 0 (0 to 0) | 0 (0 to 0) | 20.3% (7.8% to 33.6%)     |
| 3  | Niger   | Self-harm by other specified means              | 0 (0 to 0) | 0 (0 to 0) | 9.7% (4.9% to 14.5%)      |
| 4  | Niger   | Unintentional firearm injuries                  | 0 (0 to 0) | 0 (0 to 0) | -15.7% (-23% to -9%)      |
| 5  | Niger   | Venomous animal contact                         | 0 (0 to 0) | 0 (0 to 0) | -5.5% (-11.8% to 1.5%)    |
| 6  | Nigeria | Adverse effects of medical treatment            | 0 (0 to 0) | 0 (0 to 0) | 0% (0% to 0%)             |
| 7  | Nigeria | Conflict and terrorism                          | 0 (0 to 0) | 0 (0 to 1) | NA                        |
| 8  | Nigeria | Cyclist road injuries                           | 1 (0 to 2) | 1 (1 to 2) | 17% (14.1% to 20.1%)      |
| 9  | Nigeria | Drowning                                        | 0 (0 to 0) | 0 (0 to 0) | -11.6% (-16.7% to -6.6%)  |
| 10 | Nigeria | Environmental heat and cold exposure            | 0 (0 to 0) | 0 (0 to 0) | -4.2% (-7.1% to -1.4%)    |
| 11 | Nigeria | Executions and police conflict                  | 0 (0 to 0) | 0 (0 to 0) | NA                        |
| 12 | Nigeria | Exposure to forces of nature                    | 0 (0 to 0) | 0 (0 to 0) | NA                        |
| 13 | Nigeria | Falls                                           | 3 (2 to 5) | 3 (2 to 5) | 4% (3% to 5.1%)           |
| 14 | Nigeria | Fire, heat, and hot substances                  | 0 (0 to 0) | 0 (0 to 0) | -12.7% (-15.5% to -10.4%) |
| 15 | Nigeria | Foreign body in eyes                            | 0 (0 to 0) | 0 (0 to 0) | 0% (0% to 0%)             |
| 16 | Nigeria | Foreign body in other body part                 | 1 (1 to 1) | 1 (1 to 1) | -1.5% (-2.4% to -0.5%)    |
| 17 | Nigeria | Motor vehicle road injuries                     | 1 (1 to 2) | 1 (1 to 3) | 13.9% (11.3% to 17.1%)    |
| 18 | Nigeria | Motorcyclist road injuries                      | 1 (0 to 1) | 1 (0 to 1) | 9.5% (6.5% to 12.5%)      |
| 19 | Nigeria | Non-venomous animal contact                     | 0 (0 to 0) | 0 (0 to 0) | -21.8% (-24.7% to -18.9%) |
| 20 | Nigeria | Other exposure to mechanical forces             | 0 (0 to 0) | 0 (0 to 0) | -17.8% (-20.3% to -15.1%) |
| 21 | Nigeria | Other road injuries                             | 0 (0 to 0) | 0 (0 to 0) | 15% (11.8% to 18.3%)      |
| 22 | Nigeria | Other transport injuries                        | 0 (0 to 0) | 0 (0 to 0) | -5.2% (-7.2% to -3.4%)    |
| 23 | Nigeria | Other unintentional injuries                    | 0 (0 to 0) | 0 (0 to 0) | -17.7% (-21.2% to -14.1%) |
| 24 | Nigeria | Pedestrian road injuries                        | 1 (1 to 3) | 2 (1 to 3) | 8.2% (5.6% to 10.5%)      |
| 25 | Nigeria | Physical violence by firearm                    | 0 (0 to 0) | 0 (0 to 0) | 5.5% (0.5% to 10%)        |
| 26 | Nigeria | Physical violence by other means                | 0 (0 to 0) | 0 (0 to 0) | -0.8% (-3.1% to 1.4%)     |
| 27 | Nigeria | Physical violence by sharp object               | 0 (0 to 0) | 0 (0 to 0) | -4.7% (-7.3% to -2.5%)    |
| 28 | Nigeria | Poisoning by carbon monoxide                    | 0 (0 to 0) | 0 (0 to 0) | -8.7% (-12.5% to -4.8%)   |
| 29 | Nigeria | Poisoning by other means                        | 0 (0 to 0) | 0 (0 to 0) | -23.1% (-26.3% to -19.6%) |
| 30 | Nigeria | Pulmonary aspiration and foreign body in airway | 0 (0 to 0) | 0 (0 to 0) | -13.1% (-15.8% to -10.5%) |
| 31 | Nigeria | Self-harm by firearm                            | 0 (0 to 0) | 0 (0 to 0) | 8.7% (5.5% to 12%)        |
| 32 | Nigeria | Self-harm by other specified means              | 0 (0 to 0) | 0 (0 to 0) | -1% (-3.4% to 1%)         |
| 33 | Nigeria | Unintentional firearm injuries                  | 0 (0 to 0) | 0 (0 to 0) | -27.7% (-33.2% to -23.3%) |
| 34 | Nigeria | Venomous animal contact                         | 0 (0 to 0) | 0 (0 to 0) | -21.9% (-26.2% to -17.6%) |
| 35 | Niue    | Adverse effects of medical treatment            | 0 (0 to 0) | 0 (0 to 0) | 0% (0% to 0%)             |
| 36 | Niue    | Conflict and terrorism                          | 0 (0 to 0) | 0 (0 to 0) | NA                        |
| 37 | Niue    | Cyclist road injuries                           | 0 (0 to 1) | 0 (0 to 1) | 3.1% (-3.7% to 10.8%)     |
| 38 | Niue    | Drowning                                        | 0 (0 to 0) | 0 (0 to 0) | 54.8% (40.3% to 68%)      |
| 39 | Niue    | Environmental heat and cold exposure            | 0 (0 to 0) | 0 (0 to 0) | 0.4% (-4.3% to 5.3%)      |
| 40 | Niue    | Executions and police conflict                  | 0 (0 to 0) | 0 (0 to 0) | NA                        |
| 41 | Niue    | Exposure to forces of nature                    | 0 (0 to 0) | 0 (0 to 0) | NA                        |
| 42 | Niue    | Falls                                           | 4 (2 to 5) | 6 (4 to 8) | 57.2% (51.2% to 63.5%)    |
| 43 | Niue    | Fire, heat, and hot substances                  | 0 (0 to 0) | 0 (0 to 0) | 5.1% (0.7% to 9.6%)       |
| 44 | Niue    | Foreign body in eyes                            | 0 (0 to 0) | 0 (0 to 0) | 0% (0% to 0%)             |
| 45 |         |                                                 |            |            |                           |
| 46 |         |                                                 |            |            |                           |

|    |                 |                                                 |            |            |                           |
|----|-----------------|-------------------------------------------------|------------|------------|---------------------------|
| 1  |                 |                                                 |            |            |                           |
| 2  | Niue            | Foreign body in other body part                 | 0 (0 to 0) | 0 (0 to 0) | -1.2% (-4.5% to 2.6%)     |
| 3  | Niue            | Motor vehicle road injuries                     | 1 (0 to 2) | 1 (0 to 2) | -14.2% (-20.9% to -7.8%)  |
| 4  | Niue            | Motorcyclist road injuries                      | 1 (0 to 1) | 1 (0 to 1) | -4.2% (-11.6% to 3.6%)    |
| 5  | Niue            | Non-venomous animal contact                     | 0 (0 to 0) | 0 (0 to 0) | -15% (-18.5% to -11.6%)   |
| 6  | Niue            | Other exposure to mechanical forces             | 0 (0 to 0) | 0 (0 to 0) | -11.1% (-15.9% to -6.3%)  |
| 7  | Niue            | Other road injuries                             | 0 (0 to 0) | 0 (0 to 0) | 1.9% (-7% to 11%)         |
| 8  | Niue            | Other transport injuries                        | 0 (0 to 1) | 0 (0 to 0) | -7% (-11.4% to -2.4%)     |
| 9  | Niue            | Other unintentional injuries                    | 0 (0 to 0) | 0 (0 to 0) | -3.7% (-8.3% to 0.5%)     |
| 10 | Niue            | Pedestrian road injuries                        | 1 (0 to 1) | 1 (0 to 1) | -9.8% (-17.1% to -2.8%)   |
| 11 | Niue            | Physical violence by firearm                    | 0 (0 to 0) | 0 (0 to 0) | 6% (-6.4% to 17.9%)       |
| 12 | Niue            | Physical violence by other means                | 1 (0 to 1) | 1 (0 to 1) | -11.7% (-17.7% to -6.1%)  |
| 13 | Niue            | Physical violence by sharp object               | 0 (0 to 0) | 0 (0 to 0) | -29.3% (-38% to -21%)     |
| 14 | Niue            | Poisoning by carbon monoxide                    | 0 (0 to 0) | 0 (0 to 0) | 15.1% (6.2% to 25.1%)     |
| 15 | Niue            | Poisoning by other means                        | 0 (0 to 0) | 0 (0 to 0) | -10.5% (-15.9% to -4.3%)  |
| 16 | Niue            | Pulmonary aspiration and foreign body in airway | 0 (0 to 0) | 0 (0 to 0) | -5.8% (-14.9% to 3.8%)    |
| 17 | Niue            | Self-harm by firearm                            | 0 (0 to 0) | 0 (0 to 0) | -10.8% (-22.4% to 2.8%)   |
| 18 | Niue            | Self-harm by other specified means              | 0 (0 to 0) | 0 (0 to 0) | -9.7% (-15.7% to -3.6%)   |
| 19 | Niue            | Unintentional firearm injuries                  | 0 (0 to 0) | 0 (0 to 0) | -10.8% (-17.7% to -4%)    |
| 20 | Niue            | Venomous animal contact                         | 0 (0 to 0) | 0 (0 to 0) | -11.8% (-17.9% to -4.9%)  |
| 21 | North Macedonia | Adverse effects of medical treatment            | 0 (0 to 0) | 0 (0 to 0) | 0% (0% to 0%)             |
| 22 | North Macedonia | Conflict and terrorism                          | 0 (0 to 0) | 0 (0 to 0) | NA                        |
| 23 | North Macedonia | Cyclist road injuries                           | 1 (0 to 1) | 1 (0 to 1) | -4.2% (-12.5% to 3.8%)    |
| 24 | North Macedonia | Drowning                                        | 0 (0 to 0) | 0 (0 to 0) | 197.2% (156% to 251.8%)   |
| 25 | North Macedonia | Environmental heat and cold exposure            | 0 (0 to 0) | 0 (0 to 0) | 2.9% (-1% to 6.7%)        |
| 26 | North Macedonia | Executions and police conflict                  | 0 (0 to 0) | 0 (0 to 0) | NA                        |
| 27 | North Macedonia | Exposure to forces of nature                    | 0 (0 to 0) | 0 (0 to 0) | NA                        |
| 28 | North Macedonia | Falls                                           | 3 (2 to 4) | 5 (4 to 7) | 70% (60.1% to 79.9%)      |
| 29 | North Macedonia | Fire, heat, and hot substances                  | 0 (0 to 0) | 0 (0 to 0) | 5.4% (1.7% to 9.7%)       |
| 30 | North Macedonia | Foreign body in eyes                            | 0 (0 to 0) | 0 (0 to 0) | 0% (0% to 0%)             |
| 31 | North Macedonia | Foreign body in other body part                 | 0 (0 to 0) | 0 (0 to 0) | 1.7% (-3% to 6.4%)        |
| 32 | North Macedonia | Motor vehicle road injuries                     | 1 (1 to 2) | 1 (1 to 2) | 1.9% (-6.5% to 9.8%)      |
| 33 | North Macedonia | Motorcyclist road injuries                      | 0 (0 to 0) | 0 (0 to 0) | 22.6% (7.2% to 39.9%)     |
| 34 | North Macedonia | Non-venomous animal contact                     | 0 (0 to 0) | 0 (0 to 0) | -9.2% (-13% to -5.1%)     |
| 35 | North Macedonia | Other exposure to mechanical forces             | 1 (1 to 3) | 2 (1 to 3) | 6.3% (1.4% to 11.1%)      |
| 36 | North Macedonia | Other road injuries                             | 0 (0 to 0) | 0 (0 to 0) | -8.8% (-18.6% to 0.1%)    |
| 37 | North Macedonia | Other transport injuries                        | 0 (0 to 0) | 0 (0 to 0) | 8.5% (3.6% to 13.6%)      |
| 38 | North Macedonia | Other unintentional injuries                    | 1 (1 to 1) | 0 (0 to 1) | -63.8% (-67.4% to -59.7%) |
| 39 | North Macedonia | Pedestrian road injuries                        | 0 (0 to 1) | 0 (0 to 1) | -22.9% (-30.5% to -15%)   |
| 40 | North Macedonia | Physical violence by firearm                    | 0 (0 to 0) | 0 (0 to 0) | 83.2% (58.8% to 113%)     |
| 41 | North Macedonia | Physical violence by other means                | 0 (0 to 1) | 0 (0 to 1) | -30.9% (-39.7% to -23%)   |
| 42 | North Macedonia | Physical violence by sharp object               | 0 (0 to 0) | 0 (0 to 0) | -7.1% (-19.8% to 7.7%)    |
| 43 | North Macedonia | Poisoning by carbon monoxide                    | 0 (0 to 0) | 0 (0 to 0) | 39.1% (29% to 52.1%)      |
| 44 | North Macedonia | Poisoning by other means                        | 0 (0 to 0) | 0 (0 to 0) | 5.9% (-0.8% to 12.3%)     |
| 45 |                 |                                                 |            |            |                           |
| 46 |                 |                                                 |            |            |                           |

|    |                          |                                                 |               |               |                           |
|----|--------------------------|-------------------------------------------------|---------------|---------------|---------------------------|
| 1  |                          |                                                 |               |               |                           |
| 2  | North Macedonia          | Pulmonary aspiration and foreign body in airway | 0 (0 to 0)    | 0 (0 to 0)    | -9.4% (-15.9% to -2.1%)   |
| 3  | North Macedonia          | Self-harm by firearm                            | 0 (0 to 0)    | 0 (0 to 0)    | 28.5% (15% to 48.4%)      |
| 4  | North Macedonia          | Self-harm by other specified means              | 0 (0 to 0)    | 0 (0 to 0)    | -12.6% (-17.7% to -7.1%)  |
| 5  | North Macedonia          | Unintentional firearm injuries                  | 0 (0 to 0)    | 0 (0 to 0)    | -7.5% (-15.6% to 0.6%)    |
| 6  | North Macedonia          | Venomous animal contact                         | 0 (0 to 0)    | 0 (0 to 0)    | -10.8% (-15.8% to -5.2%)  |
| 7  | Northern Mariana Islands | Adverse effects of medical treatment            | 0 (0 to 0)    | 0 (0 to 0)    | 0% (0% to 0%)             |
| 8  | Northern Mariana Islands | Conflict and terrorism                          | 0 (0 to 0)    | 0 (0 to 0)    | NA                        |
| 9  | Northern Mariana Islands | Cyclist road injuries                           | 0 (0 to 1)    | 0 (0 to 1)    | 0% (-7.7% to 8.8%)        |
| 10 | Northern Mariana Islands | Drowning                                        | 0 (0 to 0)    | 0 (0 to 0)    | 40.5% (29.5% to 52%)      |
| 11 | Northern Mariana Islands | Environmental heat and cold exposure            | 0 (0 to 0)    | 0 (0 to 0)    | 2.2% (-4.2% to 7.2%)      |
| 12 | Northern Mariana Islands | Executions and police conflict                  | 0 (0 to 0)    | 0 (0 to 0)    | NA                        |
| 13 | Northern Mariana Islands | Exposure to forces of nature                    | 0 (0 to 0)    | 0 (0 to 0)    | NA                        |
| 14 | Northern Mariana Islands | Falls                                           | 6 (4 to 8)    | 8 (6 to 12)   | 45.2% (39.3% to 51.3%)    |
| 15 | Northern Mariana Islands | Fire, heat, and hot substances                  | 0 (0 to 0)    | 0 (0 to 0)    | 4.1% (-1.5% to 9.1%)      |
| 16 | Northern Mariana Islands | Foreign body in eyes                            | 0 (0 to 0)    | 0 (0 to 0)    | 0% (0% to 0%)             |
| 17 | Northern Mariana Islands | Foreign body in other body part                 | 0 (0 to 0)    | 0 (0 to 0)    | -1.5% (-5.1% to 2.6%)     |
| 18 | Northern Mariana Islands | Motor vehicle road injuries                     | 1 (1 to 3)    | 1 (0 to 2)    | -44.5% (-49.7% to -39.6%) |
| 19 | Northern Mariana Islands | Motorcyclist road injuries                      | 1 (0 to 2)    | 1 (0 to 1)    | -12.3% (-20.1% to -2.1%)  |
| 20 | Northern Mariana Islands | Non-venomous animal contact                     | 0 (0 to 0)    | 0 (0 to 0)    | 10.3% (5.6% to 15.2%)     |
| 21 | Northern Mariana Islands | Other exposure to mechanical forces             | 0 (0 to 1)    | 0 (0 to 0)    | -37.8% (-43.2% to -32.2%) |
| 22 | Northern Mariana Islands | Other road injuries                             | 0 (0 to 0)    | 0 (0 to 0)    | -7.9% (-17.3% to 2.9%)    |
| 23 | Northern Mariana Islands | Other transport injuries                        | 1 (0 to 1)    | 0 (0 to 1)    | -39.9% (-45.3% to -34.1%) |
| 24 | Northern Mariana Islands | Other unintentional injuries                    | 0 (0 to 1)    | 0 (0 to 0)    | -17.1% (-21.4% to -12.4%) |
| 25 | Northern Mariana Islands | Pedestrian road injuries                        | 1 (1 to 2)    | 1 (0 to 1)    | -37.8% (-43.7% to -31.9%) |
| 26 | Northern Mariana Islands | Physical violence by firearm                    | 0 (0 to 0)    | 0 (0 to 0)    | -43.8% (-53.4% to -33.5%) |
| 27 | Northern Mariana Islands | Physical violence by other means                | 1 (0 to 2)    | 1 (0 to 1)    | -9.1% (-15.2% to -1.5%)   |
| 28 | Northern Mariana Islands | Physical violence by sharp object               | 0 (0 to 0)    | 0 (0 to 0)    | -55.4% (-62% to -48.2%)   |
| 29 | Northern Mariana Islands | Poisoning by carbon monoxide                    | 0 (0 to 0)    | 0 (0 to 0)    | 13% (4.3% to 22.7%)       |
| 30 | Northern Mariana Islands | Poisoning by other means                        | 0 (0 to 0)    | 0 (0 to 0)    | -5.9% (-12.2% to 0.2%)    |
| 31 | Northern Mariana Islands | Pulmonary aspiration and foreign body in airway | 0 (0 to 0)    | 0 (0 to 0)    | 27.1% (11.2% to 45.3%)    |
| 32 | Northern Mariana Islands | Self-harm by firearm                            | 0 (0 to 0)    | 0 (0 to 0)    | -11.5% (-30.4% to 5.3%)   |
| 33 | Northern Mariana Islands | Self-harm by other specified means              | 0 (0 to 0)    | 0 (0 to 0)    | 31.3% (21.8% to 43.3%)    |
| 34 | Northern Mariana Islands | Unintentional firearm injuries                  | 0 (0 to 0)    | 0 (0 to 0)    | -39.7% (-47.8% to -31.4%) |
| 35 | Northern Mariana Islands | Venomous animal contact                         | 0 (0 to 0)    | 0 (0 to 0)    | 8.1% (0.2% to 15.5%)      |
| 36 | Norway                   | Adverse effects of medical treatment            | 0 (0 to 0)    | 0 (0 to 0)    | 0% (0% to 0%)             |
| 37 | Norway                   | Conflict and terrorism                          | 0 (0 to 0)    | 0 (0 to 0)    | NA                        |
| 38 | Norway                   | Cyclist road injuries                           | 1 (0 to 1)    | 0 (0 to 1)    | -28.5% (-32.2% to -24.6%) |
| 39 | Norway                   | Drowning                                        | 0 (0 to 0)    | 0 (0 to 0)    | -7.8% (-11.6% to -4.3%)   |
| 40 | Norway                   | Environmental heat and cold exposure            | 0 (0 to 0)    | 0 (0 to 0)    | -14.7% (-18% to -12.2%)   |
| 41 | Norway                   | Executions and police conflict                  | 0 (0 to 0)    | 0 (0 to 0)    | NA                        |
| 42 | Norway                   | Exposure to forces of nature                    | 0 (0 to 0)    | 0 (0 to 0)    | NA                        |
| 43 | Norway                   | Falls                                           | 20 (13 to 31) | 21 (14 to 33) | 6.6% (3.9% to 9.5%)       |
| 44 | Norway                   | Fire, heat, and hot substances                  | 0 (0 to 0)    | 0 (0 to 0)    | -25.3% (-28.6% to -22.2%) |
| 45 |                          |                                                 |               |               |                           |
| 46 |                          |                                                 |               |               |                           |

|    |        |                                                 |            |            |                           |
|----|--------|-------------------------------------------------|------------|------------|---------------------------|
| 1  |        |                                                 |            |            |                           |
| 2  | Norway | Foreign body in eyes                            | 0 (0 to 0) | 0 (0 to 0) | 0% (0% to 0%)             |
| 3  | Norway | Foreign body in other body part                 | 1 (0 to 1) | 1 (0 to 1) | 2.7% (1.8% to 3.8%)       |
| 4  | Norway | Motor vehicle road injuries                     | 1 (0 to 1) | 0 (0 to 1) | -43.5% (-47% to -39.8%)   |
| 5  | Norway | Motorcyclist road injuries                      | 1 (0 to 1) | 0 (0 to 1) | -47.9% (-51.5% to -44.5%) |
| 6  | Norway | Non-venomous animal contact                     | 0 (0 to 0) | 0 (0 to 0) | -6.3% (-7.9% to -4.7%)    |
| 7  | Norway | Other exposure to mechanical forces             | 1 (0 to 2) | 1 (0 to 1) | -20.1% (-24.6% to -16.7%) |
| 8  | Norway | Other road injuries                             | 0 (0 to 0) | 0 (0 to 0) | -58.7% (-64.2% to -53.5%) |
| 9  | Norway | Other transport injuries                        | 1 (0 to 1) | 0 (0 to 1) | -47.4% (-49.5% to -45.3%) |
| 10 | Norway | Other unintentional injuries                    | 1 (0 to 1) | 1 (0 to 1) | -4.8% (-8% to -1.7%)      |
| 11 | Norway | Pedestrian road injuries                        | 0 (0 to 1) | 0 (0 to 0) | -38.6% (-43.9% to -32.7%) |
| 12 | Norway | Physical violence by firearm                    | 0 (0 to 0) | 0 (0 to 0) | 25.6% (17.1% to 36%)      |
| 13 | Norway | Physical violence by other means                | 0 (0 to 1) | 0 (0 to 0) | -20.8% (-25.5% to -16.9%) |
| 14 | Norway | Physical violence by sharp object               | 0 (0 to 0) | 0 (0 to 0) | -25.7% (-32.4% to -19.8%) |
| 15 | Norway | Poisoning by carbon monoxide                    | 0 (0 to 0) | 0 (0 to 0) | -1.6% (-5.5% to 2.1%)     |
| 16 | Norway | Poisoning by other means                        | 0 (0 to 0) | 0 (0 to 0) | 18.8% (14.5% to 22.5%)    |
| 17 | Norway | Pulmonary aspiration and foreign body in airway | 0 (0 to 0) | 0 (0 to 0) | -10.6% (-13.8% to -7.8%)  |
| 18 | Norway | Self-harm by firearm                            | 0 (0 to 0) | 0 (0 to 0) | -48.2% (-55.8% to -41%)   |
| 19 | Norway | Self-harm by other specified means              | 0 (0 to 0) | 0 (0 to 0) | -24.1% (-26.6% to -20.5%) |
| 20 | Norway | Unintentional firearm injuries                  | 0 (0 to 0) | 0 (0 to 0) | -1.8% (-7.2% to 2.2%)     |
| 21 | Norway | Venomous animal contact                         | 0 (0 to 0) | 0 (0 to 0) | -6% (-8.6% to -2.9%)      |
| 22 | Oman   | Adverse effects of medical treatment            | 0 (0 to 0) | 0 (0 to 0) | 0% (0% to 0%)             |
| 23 | Oman   | Conflict and terrorism                          | 0 (0 to 0) | 0 (0 to 0) | NA                        |
| 24 | Oman   | Cyclist road injuries                           | 0 (0 to 0) | 0 (0 to 0) | -17.3% (-26.2% to -7.5%)  |
| 25 | Oman   | Drowning                                        | 0 (0 to 0) | 0 (0 to 0) | 67.6% (47.1% to 90.6%)    |
| 26 | Oman   | Environmental heat and cold exposure            | 0 (0 to 0) | 0 (0 to 0) | -8.7% (-13.6% to -3%)     |
| 27 | Oman   | Executions and police conflict                  | 0 (0 to 0) | 0 (0 to 0) | NA                        |
| 28 | Oman   | Exposure to forces of nature                    | 0 (0 to 0) | 0 (0 to 0) | NA                        |
| 29 | Oman   | Falls                                           | 3 (2 to 3) | 3 (2 to 5) | 27.5% (22.4% to 32.9%)    |
| 30 | Oman   | Fire, heat, and hot substances                  | 0 (0 to 0) | 0 (0 to 0) | 4% (-3.1% to 12%)         |
| 31 | Oman   | Foreign body in eyes                            | 0 (0 to 0) | 0 (0 to 0) | 0% (0% to 0%)             |
| 32 | Oman   | Foreign body in other body part                 | 0 (0 to 0) | 0 (0 to 0) | 0.2% (-3.4% to 4.1%)      |
| 33 | Oman   | Motor vehicle road injuries                     | 2 (1 to 3) | 1 (1 to 2) | -26% (-32.8% to -18.2%)   |
| 34 | Oman   | Motorcyclist road injuries                      | 0 (0 to 0) | 0 (0 to 0) | -27.8% (-38.4% to -15.5%) |
| 35 | Oman   | Non-venomous animal contact                     | 0 (0 to 0) | 0 (0 to 0) | -5.5% (-10.3% to -1.2%)   |
| 36 | Oman   | Other exposure to mechanical forces             | 0 (0 to 1) | 0 (0 to 0) | -36.8% (-43.6% to -30.7%) |
| 37 | Oman   | Other road injuries                             | 0 (0 to 0) | 0 (0 to 0) | -2.7% (-14% to 10.1%)     |
| 38 | Oman   | Other transport injuries                        | 0 (0 to 0) | 0 (0 to 0) | 9.1% (4% to 14.1%)        |
| 39 | Oman   | Other unintentional injuries                    | 0 (0 to 0) | 0 (0 to 0) | 9.8% (5.3% to 15%)        |
| 40 | Oman   | Pedestrian road injuries                        | 1 (0 to 1) | 1 (0 to 1) | -22.2% (-29.3% to -13.9%) |
| 41 | Oman   | Physical violence by firearm                    | 0 (0 to 0) | 0 (0 to 0) | 118.7% (87.3% to 159.5%)  |
| 42 | Oman   | Physical violence by other means                | 0 (0 to 0) | 0 (0 to 0) | -4.2% (-15% to 4.9%)      |
| 43 | Oman   | Physical violence by sharp object               | 0 (0 to 0) | 0 (0 to 0) | -5.9% (-18.3% to 4.4%)    |
| 44 | Oman   | Poisoning by carbon monoxide                    | 0 (0 to 0) | 0 (0 to 0) | 38.9% (25.3% to 54.2%)    |
| 45 |        |                                                 |            |            |                           |
| 46 |        |                                                 |            |            |                           |

|    |          |                                                 |             |              |                           |
|----|----------|-------------------------------------------------|-------------|--------------|---------------------------|
| 1  |          |                                                 |             |              |                           |
| 2  | Oman     | Poisoning by other means                        | 0 (0 to 0)  | 0 (0 to 0)   | -22.7% (-31.1% to -14.2%) |
| 3  | Oman     | Pulmonary aspiration and foreign body in airway | 0 (0 to 0)  | 0 (0 to 0)   | -2% (-9.6% to 4.9%)       |
| 4  | Oman     | Self-harm by firearm                            | 0 (0 to 0)  | 0 (0 to 0)   | 22.3% (9.1% to 39.8%)     |
| 5  | Oman     | Self-harm by other specified means              | 0 (0 to 0)  | 0 (0 to 0)   | 3.5% (-3.7% to 10.6%)     |
| 6  | Oman     | Unintentional firearm injuries                  | 0 (0 to 0)  | 0 (0 to 0)   | -4.7% (-15.1% to 7.1%)    |
| 7  | Oman     | Venomous animal contact                         | 0 (0 to 0)  | 0 (0 to 0)   | -2.4% (-8.7% to 4.6%)     |
| 8  | Pakistan | Adverse effects of medical treatment            | 0 (0 to 0)  | 0 (0 to 0)   | 0% (0% to 0%)             |
| 9  | Pakistan | Conflict and terrorism                          | 0 (0 to 0)  | 0 (0 to 0)   | NA                        |
| 10 | Pakistan | Cyclist road injuries                           | 1 (0 to 1)  | 1 (0 to 1)   | 27.4% (22% to 32.3%)      |
| 11 | Pakistan | Drowning                                        | 0 (0 to 0)  | 0 (0 to 0)   | -3.2% (-13.4% to 8%)      |
| 12 | Pakistan | Environmental heat and cold exposure            | 0 (0 to 0)  | 0 (0 to 0)   | 1.2% (-2% to 4.5%)        |
| 13 | Pakistan | Executions and police conflict                  | 0 (0 to 0)  | 0 (0 to 0)   | NA                        |
| 14 | Pakistan | Exposure to forces of nature                    | 0 (0 to 0)  | 0 (0 to 0)   | NA                        |
| 15 | Pakistan | Falls                                           | 1 (1 to 1)  | 1 (1 to 2)   | 31.2% (27.8% to 34.8%)    |
| 16 | Pakistan | Fire, heat, and hot substances                  | 0 (0 to 0)  | 0 (0 to 0)   | -8.1% (-11.8% to -3.8%)   |
| 17 | Pakistan | Foreign body in eyes                            | 0 (0 to 0)  | 0 (0 to 0)   | 0% (0% to 0%)             |
| 18 | Pakistan | Foreign body in other body part                 | 0 (0 to 0)  | 0 (0 to 0)   | -5.1% (-7.5% to -2.6%)    |
| 19 | Pakistan | Motor vehicle road injuries                     | 1 (0 to 1)  | 1 (0 to 1)   | 47.7% (41.3% to 54.1%)    |
| 20 | Pakistan | Motorcyclist road injuries                      | 0 (0 to 1)  | 1 (0 to 1)   | 74.1% (66.1% to 82.9%)    |
| 21 | Pakistan | Non-venomous animal contact                     | 0 (0 to 0)  | 0 (0 to 0)   | -15.8% (-18.4% to -13.3%) |
| 22 | Pakistan | Other exposure to mechanical forces             | 0 (0 to 0)  | 0 (0 to 0)   | -1.9% (-5.3% to 2.1%)     |
| 23 | Pakistan | Other road injuries                             | 0 (0 to 0)  | 0 (0 to 0)   | 19.6% (12.5% to 26.4%)    |
| 24 | Pakistan | Other transport injuries                        | 0 (0 to 0)  | 0 (0 to 0)   | 14.1% (10.6% to 17.6%)    |
| 25 | Pakistan | Other unintentional injuries                    | 0 (0 to 0)  | 0 (0 to 0)   | -12.8% (-15.3% to -9.6%)  |
| 26 | Pakistan | Pedestrian road injuries                        | 0 (0 to 1)  | 0 (0 to 1)   | 41% (34.4% to 47.6%)      |
| 27 | Pakistan | Physical violence by firearm                    | 0 (0 to 0)  | 0 (0 to 0)   | -13.3% (-19.9% to -5.2%)  |
| 28 | Pakistan | Physical violence by other means                | 1 (0 to 1)  | 1 (0 to 1)   | -7.1% (-11.2% to -2.7%)   |
| 29 | Pakistan | Physical violence by sharp object               | 0 (0 to 0)  | 0 (0 to 0)   | -0.3% (-5.9% to 6%)       |
| 30 | Pakistan | Poisoning by carbon monoxide                    | 0 (0 to 0)  | 0 (0 to 0)   | -16.5% (-23.6% to -9.7%)  |
| 31 | Pakistan | Poisoning by other means                        | 0 (0 to 0)  | 0 (0 to 0)   | -22.1% (-27.8% to -16.7%) |
| 32 | Pakistan | Pulmonary aspiration and foreign body in airway | 0 (0 to 0)  | 0 (0 to 0)   | -8.5% (-13.4% to -3.6%)   |
| 33 | Pakistan | Self-harm by firearm                            | 0 (0 to 0)  | 0 (0 to 0)   | 26.2% (17.1% to 35.7%)    |
| 34 | Pakistan | Self-harm by other specified means              | 0 (0 to 0)  | 0 (0 to 0)   | 20.4% (15.9% to 25.2%)    |
| 35 | Pakistan | Unintentional firearm injuries                  | 0 (0 to 0)  | 0 (0 to 0)   | -7.5% (-12.1% to -2.8%)   |
| 36 | Pakistan | Venomous animal contact                         | 0 (0 to 0)  | 0 (0 to 0)   | -10.2% (-15.5% to -5.3%)  |
| 37 | Palau    | Adverse effects of medical treatment            | 0 (0 to 0)  | 0 (0 to 0)   | 0% (0% to 0%)             |
| 38 | Palau    | Conflict and terrorism                          | 0 (0 to 0)  | 0 (0 to 0)   | NA                        |
| 39 | Palau    | Cyclist road injuries                           | 0 (0 to 1)  | 0 (0 to 1)   | 5.3% (-1.7% to 13.6%)     |
| 40 | Palau    | Drowning                                        | 0 (0 to 0)  | 0 (0 to 0)   | 34.4% (24.9% to 46.3%)    |
| 41 | Palau    | Environmental heat and cold exposure            | 0 (0 to 0)  | 0 (0 to 0)   | -4.1% (-8.3% to 0.8%)     |
| 42 | Palau    | Executions and police conflict                  | 0 (0 to 0)  | 0 (0 to 0)   | NA                        |
| 43 | Palau    | Exposure to forces of nature                    | 0 (0 to 0)  | 0 (0 to 0)   | NA                        |
| 44 | Palau    | Falls                                           | 8 (6 to 12) | 11 (7 to 16) | 31.8% (26.7% to 36.6%)    |
| 45 |          |                                                 |             |              |                           |
| 46 |          |                                                 |             |              |                           |



|    |           |                                                 |              |            |                           |
|----|-----------|-------------------------------------------------|--------------|------------|---------------------------|
| 1  |           |                                                 |              |            |                           |
| 2  | Palau     | Fire, heat, and hot substances                  | 0 (0 to 0)   | 0 (0 to 0) | -10.2% (-14.7% to -5.6%)  |
| 3  | Palau     | Foreign body in eyes                            | 0 (0 to 0)   | 0 (0 to 0) | 0% (0% to 0%)             |
| 4  | Palau     | Foreign body in other body part                 | 0 (0 to 0)   | 0 (0 to 0) | -3.3% (-6.7% to 0.1%)     |
| 5  | Palau     | Motor vehicle road injuries                     | 1 (0 to 1)   | 1 (0 to 1) | -1.2% (-8.5% to 7.2%)     |
| 6  | Palau     | Motorcyclist road injuries                      | 1 (0 to 2)   | 1 (0 to 2) | 0.2% (-7.5% to 8.5%)      |
| 7  | Palau     | Non-venomous animal contact                     | 0 (0 to 1)   | 0 (0 to 1) | -4.1% (-8.6% to 1.1%)     |
| 8  | Palau     | Other exposure to mechanical forces             | 0 (0 to 1)   | 0 (0 to 1) | -11.3% (-16.2% to -5.9%)  |
| 9  | Palau     | Other road injuries                             | 0 (0 to 0)   | 0 (0 to 0) | 8.7% (-2.6% to 21.2%)     |
| 10 | Palau     | Other transport injuries                        | 1 (0 to 1)   | 1 (0 to 1) | -0.1% (-5.3% to 4.4%)     |
| 11 | Palau     | Other unintentional injuries                    | 0 (0 to 1)   | 0 (0 to 1) | -9.2% (-13.8% to -4.4%)   |
| 12 | Palau     | Pedestrian road injuries                        | 1 (0 to 1)   | 1 (0 to 1) | -0.3% (-7.1% to 7.6%)     |
| 13 | Palau     | Physical violence by firearm                    | 0 (0 to 0)   | 0 (0 to 0) | 26.8% (13.5% to 41.5%)    |
| 14 | Palau     | Physical violence by other means                | 1 (0 to 2)   | 1 (0 to 2) | -5.9% (-11.2% to -0.2%)   |
| 15 | Palau     | Physical violence by sharp object               | 0 (0 to 0)   | 0 (0 to 0) | -11.4% (-20.9% to -0.6%)  |
| 16 | Palau     | Poisoning by carbon monoxide                    | 0 (0 to 0)   | 0 (0 to 0) | 8.1% (-2.1% to 19.5%)     |
| 17 | Palau     | Poisoning by other means                        | 0 (0 to 0)   | 0 (0 to 0) | -26% (-31.7% to -20.7%)   |
| 18 | Palau     | Pulmonary aspiration and foreign body in airway | 0 (0 to 0)   | 0 (0 to 0) | -8.4% (-17.4% to 1.6%)    |
| 19 | Palau     | Self-harm by firearm                            | 0 (0 to 0)   | 0 (0 to 0) | 13% (-3.7% to 33.9%)      |
| 20 | Palau     | Self-harm by other specified means              | 0 (0 to 0)   | 0 (0 to 0) | -3.5% (-10.9% to 4.6%)    |
| 21 | Palau     | Unintentional firearm injuries                  | 0 (0 to 0)   | 0 (0 to 0) | -12.9% (-19.7% to -5%)    |
| 22 | Palau     | Venomous animal contact                         | 0 (0 to 0)   | 0 (0 to 0) | -1.1% (-8.3% to 8.2%)     |
| 23 | Palestine | Adverse effects of medical treatment            | 0 (0 to 0)   | 0 (0 to 0) | 0% (0% to 0%)             |
| 24 | Palestine | Conflict and terrorism                          | 12 (3 to 37) | 1 (0 to 2) | NA                        |
| 25 | Palestine | Cyclist road injuries                           | 0 (0 to 0)   | 0 (0 to 0) | 0.5% (-8% to 10.8%)       |
| 26 | Palestine | Drowning                                        | 0 (0 to 0)   | 0 (0 to 0) | 63.2% (41.6% to 84.2%)    |
| 27 | Palestine | Environmental heat and cold exposure            | 0 (0 to 0)   | 0 (0 to 0) | 3% (-1.6% to 8.2%)        |
| 28 | Palestine | Executions and police conflict                  | 0 (0 to 0)   | 0 (0 to 0) | NA                        |
| 29 | Palestine | Exposure to forces of nature                    | 0 (0 to 0)   | 0 (0 to 0) | NA                        |
| 30 | Palestine | Falls                                           | 2 (1 to 3)   | 2 (2 to 3) | 14% (9.2% to 18%)         |
| 31 | Palestine | Fire, heat, and hot substances                  | 0 (0 to 0)   | 0 (0 to 0) | -3.3% (-13.4% to 6.4%)    |
| 32 | Palestine | Foreign body in eyes                            | 0 (0 to 0)   | 0 (0 to 0) | 0% (0% to 0%)             |
| 33 | Palestine | Foreign body in other body part                 | 0 (0 to 0)   | 0 (0 to 0) | 0.8% (-2.8% to 4.1%)      |
| 34 | Palestine | Motor vehicle road injuries                     | 0 (0 to 1)   | 0 (0 to 1) | -20.6% (-27.1% to -13.9%) |
| 35 | Palestine | Motorcyclist road injuries                      | 0 (0 to 0)   | 0 (0 to 0) | -14.3% (-24.3% to -3.7%)  |
| 36 | Palestine | Non-venomous animal contact                     | 0 (0 to 0)   | 0 (0 to 0) | -3.6% (-8.5% to 0.6%)     |
| 37 | Palestine | Other exposure to mechanical forces             | 0 (0 to 0)   | 0 (0 to 0) | 1% (-7.4% to 10%)         |
| 38 | Palestine | Other road injuries                             | 0 (0 to 0)   | 0 (0 to 0) | 2.1% (-7.3% to 13.3%)     |
| 39 | Palestine | Other transport injuries                        | 0 (0 to 0)   | 0 (0 to 0) | 5.9% (1.9% to 10.5%)      |
| 40 | Palestine | Other unintentional injuries                    | 0 (0 to 0)   | 0 (0 to 0) | -3.6% (-10.9% to 2.9%)    |
| 41 | Palestine | Pedestrian road injuries                        | 0 (0 to 0)   | 0 (0 to 0) | -16.6% (-24.2% to -8.2%)  |
| 42 | Palestine | Physical violence by firearm                    | 0 (0 to 0)   | 0 (0 to 0) | 402.2% (313.1% to 531.8%) |
| 43 | Palestine | Physical violence by other means                | 0 (0 to 0)   | 0 (0 to 0) | 89.9% (61.8% to 120.5%)   |
| 44 | Palestine | Physical violence by sharp object               | 0 (0 to 0)   | 0 (0 to 0) | 70.7% (43.1% to 101%)     |
| 45 |           |                                                 |              |            |                           |
| 46 |           |                                                 |              |            |                           |

|    |                  |                                                 |            |            |                           |
|----|------------------|-------------------------------------------------|------------|------------|---------------------------|
| 1  |                  |                                                 |            |            |                           |
| 2  | Palestine        | Poisoning by carbon monoxide                    | 0 (0 to 0) | 0 (0 to 0) | 61.6% (46.4% to 78.5%)    |
| 3  | Palestine        | Poisoning by other means                        | 0 (0 to 0) | 0 (0 to 0) | 9.2% (1% to 17.3%)        |
| 4  | Palestine        | Pulmonary aspiration and foreign body in airway | 0 (0 to 0) | 0 (0 to 0) | 0.5% (-6.5% to 7.7%)      |
| 5  | Palestine        | Self-harm by firearm                            | 0 (0 to 0) | 0 (0 to 0) | 25.1% (13.7% to 39.3%)    |
| 6  | Palestine        | Self-harm by other specified means              | 0 (0 to 0) | 0 (0 to 0) | 3.7% (-3% to 10.4%)       |
| 7  | Palestine        | Unintentional firearm injuries                  | 0 (0 to 0) | 0 (0 to 0) | -27.9% (-38.9% to -18.6%) |
| 8  | Palestine        | Venomous animal contact                         | 0 (0 to 0) | 0 (0 to 0) | -3.6% (-10.3% to 3.1%)    |
| 9  | Panama           | Adverse effects of medical treatment            | 0 (0 to 0) | 0 (0 to 0) | 0% (0% to 0%)             |
| 10 | Panama           | Conflict and terrorism                          | 0 (0 to 0) | 0 (0 to 0) | NA                        |
| 11 | Panama           | Cyclist road injuries                           | 0 (0 to 0) | 0 (0 to 0) | -29% (-36.9% to -20.8%)   |
| 12 | Panama           | Drowning                                        | 0 (0 to 0) | 0 (0 to 0) | 11.3% (-2.1% to 25.8%)    |
| 13 | Panama           | Environmental heat and cold exposure            | 0 (0 to 0) | 0 (0 to 0) | 3.2% (-0.7% to 8.2%)      |
| 14 | Panama           | Executions and police conflict                  | 0 (0 to 0) | 0 (0 to 0) | NA                        |
| 15 | Panama           | Exposure to forces of nature                    | 0 (0 to 0) | 0 (0 to 0) | NA                        |
| 16 | Panama           | Falls                                           | 2 (1 to 3) | 2 (1 to 3) | -2.6% (-7.5% to 2.4%)     |
| 17 | Panama           | Fire, heat, and hot substances                  | 0 (0 to 0) | 0 (0 to 0) | 0.7% (-4.4% to 7.1%)      |
| 18 | Panama           | Foreign body in eyes                            | 0 (0 to 0) | 0 (0 to 0) | 0% (0% to 0%)             |
| 19 | Panama           | Foreign body in other body part                 | 0 (0 to 0) | 0 (0 to 0) | -3.8% (-7.9% to 0.1%)     |
| 20 | Panama           | Motor vehicle road injuries                     | 1 (0 to 1) | 1 (0 to 1) | -16.9% (-23.9% to -8.6%)  |
| 21 | Panama           | Motorcyclist road injuries                      | 0 (0 to 0) | 0 (0 to 0) | 33% (19.7% to 48.5%)      |
| 22 | Panama           | Non-venomous animal contact                     | 0 (0 to 0) | 0 (0 to 0) | -24.3% (-29.5% to -19%)   |
| 23 | Panama           | Other exposure to mechanical forces             | 0 (0 to 1) | 0 (0 to 1) | -1.6% (-8.4% to 4.8%)     |
| 24 | Panama           | Other road injuries                             | 0 (0 to 0) | 0 (0 to 0) | -6.4% (-16.2% to 4.6%)    |
| 25 | Panama           | Other transport injuries                        | 0 (0 to 0) | 0 (0 to 0) | -1.3% (-5.4% to 3.1%)     |
| 26 | Panama           | Other unintentional injuries                    | 0 (0 to 0) | 0 (0 to 0) | -15.1% (-20.3% to -10.2%) |
| 27 | Panama           | Pedestrian road injuries                        | 0 (0 to 1) | 0 (0 to 0) | -35.4% (-42.9% to -28%)   |
| 28 | Panama           | Physical violence by firearm                    | 0 (0 to 0) | 0 (0 to 0) | 204% (139.9% to 302.5%)   |
| 29 | Panama           | Physical violence by other means                | 0 (0 to 0) | 0 (0 to 0) | 38.9% (17.8% to 62.8%)    |
| 30 | Panama           | Physical violence by sharp object               | 0 (0 to 0) | 0 (0 to 0) | 0.2% (-20.3% to 21.8%)    |
| 31 | Panama           | Poisoning by carbon monoxide                    | 0 (0 to 0) | 0 (0 to 0) | 42.6% (29% to 58.5%)      |
| 32 | Panama           | Poisoning by other means                        | 0 (0 to 0) | 0 (0 to 0) | 0.9% (-6.4% to 11.6%)     |
| 33 | Panama           | Pulmonary aspiration and foreign body in airway | 0 (0 to 0) | 0 (0 to 0) | -42% (-49.4% to -33.2%)   |
| 34 | Panama           | Self-harm by firearm                            | 0 (0 to 0) | 0 (0 to 0) | 8.7% (-4.5% to 23%)       |
| 35 | Panama           | Self-harm by other specified means              | 0 (0 to 0) | 0 (0 to 0) | 1% (-5.8% to 7.6%)        |
| 36 | Panama           | Unintentional firearm injuries                  | 0 (0 to 0) | 0 (0 to 0) | 11.9% (2.7% to 22.4%)     |
| 37 | Panama           | Venomous animal contact                         | 0 (0 to 0) | 0 (0 to 0) | -35.7% (-41.6% to -31.4%) |
| 38 | Papua New Guinea | Adverse effects of medical treatment            | 0 (0 to 0) | 0 (0 to 0) | 0% (0% to 0%)             |
| 39 | Papua New Guinea | Conflict and terrorism                          | 0 (0 to 1) | 0 (0 to 0) | NA                        |
| 40 | Papua New Guinea | Cyclist road injuries                           | 0 (0 to 0) | 0 (0 to 0) | 6.3% (-1% to 14.1%)       |
| 41 | Papua New Guinea | Drowning                                        | 0 (0 to 0) | 0 (0 to 0) | 5.9% (-3.4% to 15.6%)     |
| 42 | Papua New Guinea | Environmental heat and cold exposure            | 0 (0 to 0) | 0 (0 to 0) | -2.1% (-7.5% to 3.4%)     |
| 43 | Papua New Guinea | Executions and police conflict                  | 0 (0 to 0) | 0 (0 to 0) | NA                        |
| 44 | Papua New Guinea | Exposure to forces of nature                    | 0 (0 to 0) | 0 (0 to 0) | NA                        |
| 45 |                  |                                                 |            |            |                           |
| 46 |                  |                                                 |            |            |                           |

|    |                  |                                                 |            |            |                          |
|----|------------------|-------------------------------------------------|------------|------------|--------------------------|
| 1  |                  |                                                 |            |            |                          |
| 2  | Papua New Guinea | Falls                                           | 2 (1 to 2) | 2 (2 to 3) | 46.4% (39.8% to 53.3%)   |
| 3  | Papua New Guinea | Fire, heat, and hot substances                  | 0 (0 to 0) | 0 (0 to 0) | 1.1% (-4.1% to 6%)       |
| 4  | Papua New Guinea | Foreign body in eyes                            | 0 (0 to 0) | 0 (0 to 0) | 0% (0% to 0%)            |
| 5  | Papua New Guinea | Foreign body in other body part                 | 0 (0 to 0) | 0 (0 to 0) | -1.6% (-5.6% to 1.9%)    |
| 6  | Papua New Guinea | Motor vehicle road injuries                     | 1 (0 to 1) | 1 (0 to 1) | 0.3% (-6.6% to 7.8%)     |
| 7  | Papua New Guinea | Motorcyclist road injuries                      | 0 (0 to 0) | 0 (0 to 0) | 5.7% (-3.1% to 14.4%)    |
| 8  | Papua New Guinea | Non-venomous animal contact                     | 0 (0 to 0) | 0 (0 to 0) | -12% (-16.4% to -7.5%)   |
| 9  | Papua New Guinea | Other exposure to mechanical forces             | 0 (0 to 0) | 0 (0 to 0) | -6.1% (-12.5% to -0.2%)  |
| 10 | Papua New Guinea | Other road injuries                             | 0 (0 to 0) | 0 (0 to 0) | 5.1% (-5.4% to 15.5%)    |
| 11 | Papua New Guinea | Other transport injuries                        | 0 (0 to 0) | 0 (0 to 0) | -7.3% (-11.6% to -2.7%)  |
| 12 | Papua New Guinea | Other unintentional injuries                    | 0 (0 to 0) | 0 (0 to 0) | 1.3% (-3.9% to 6.2%)     |
| 13 | Papua New Guinea | Pedestrian road injuries                        | 0 (0 to 0) | 0 (0 to 0) | -4.9% (-13% to 3.1%)     |
| 14 | Papua New Guinea | Physical violence by firearm                    | 0 (0 to 0) | 0 (0 to 0) | 62.9% (48.9% to 77.2%)   |
| 15 | Papua New Guinea | Physical violence by other means                | 0 (0 to 1) | 1 (0 to 1) | 56.3% (45.5% to 66.9%)   |
| 16 | Papua New Guinea | Physical violence by sharp object               | 0 (0 to 0) | 0 (0 to 0) | 42.7% (29.5% to 55.2%)   |
| 17 | Papua New Guinea | Poisoning by carbon monoxide                    | 0 (0 to 0) | 0 (0 to 0) | 16.3% (4.9% to 28.9%)    |
| 18 | Papua New Guinea | Poisoning by other means                        | 0 (0 to 0) | 0 (0 to 0) | -9% (-14.8% to -2%)      |
| 19 | Papua New Guinea | Pulmonary aspiration and foreign body in airway | 0 (0 to 0) | 0 (0 to 0) | 3.2% (-7.7% to 14.6%)    |
| 20 | Papua New Guinea | Self-harm by firearm                            | 0 (0 to 0) | 0 (0 to 0) | -0.1% (-12.7% to 12.4%)  |
| 21 | Papua New Guinea | Self-harm by other specified means              | 0 (0 to 0) | 0 (0 to 0) | 5.3% (-1.1% to 12.3%)    |
| 22 | Papua New Guinea | Unintentional firearm injuries                  | 0 (0 to 0) | 0 (0 to 0) | -2.1% (-7.7% to 3.4%)    |
| 23 | Papua New Guinea | Venomous animal contact                         | 0 (0 to 0) | 0 (0 to 0) | -15.2% (-20.9% to -9.7%) |
| 24 | Paraguay         | Adverse effects of medical treatment            | 0 (0 to 0) | 0 (0 to 0) | 0% (0% to 0%)            |
| 25 | Paraguay         | Conflict and terrorism                          | 0 (0 to 0) | 0 (0 to 0) | NA                       |
| 26 | Paraguay         | Cyclist road injuries                           | 0 (0 to 0) | 0 (0 to 0) | -15.9% (-24.9% to -6%)   |
| 27 | Paraguay         | Drowning                                        | 0 (0 to 0) | 0 (0 to 0) | 10.8% (-1% to 22.6%)     |
| 28 | Paraguay         | Environmental heat and cold exposure            | 0 (0 to 0) | 0 (0 to 0) | 11.1% (6.6% to 16.5%)    |
| 29 | Paraguay         | Executions and police conflict                  | 0 (0 to 0) | 0 (0 to 0) | NA                       |
| 30 | Paraguay         | Exposure to forces of nature                    | 0 (0 to 0) | 0 (0 to 0) | NA                       |
| 31 | Paraguay         | Falls                                           | 2 (2 to 3) | 2 (2 to 3) | 5.4% (1.4% to 9.5%)      |
| 32 | Paraguay         | Fire, heat, and hot substances                  | 0 (0 to 0) | 0 (0 to 0) | -2.8% (-6.7% to 1.5%)    |
| 33 | Paraguay         | Foreign body in eyes                            | 0 (0 to 0) | 0 (0 to 0) | 0% (0% to 0%)            |
| 34 | Paraguay         | Foreign body in other body part                 | 0 (0 to 0) | 0 (0 to 0) | -2.2% (-6.8% to 2.5%)    |
| 35 | Paraguay         | Motor vehicle road injuries                     | 0 (0 to 0) | 0 (0 to 0) | 7.1% (-5.9% to 20.2%)    |
| 36 | Paraguay         | Motorcyclist road injuries                      | 0 (0 to 1) | 1 (0 to 1) | 59.1% (39.4% to 83.3%)   |
| 37 | Paraguay         | Non-venomous animal contact                     | 0 (0 to 0) | 0 (0 to 0) | -14.3% (-18.9% to -9.1%) |
| 38 | Paraguay         | Other exposure to mechanical forces             | 0 (0 to 0) | 0 (0 to 0) | -1.4% (-8.4% to 6.4%)    |
| 39 | Paraguay         | Other road injuries                             | 0 (0 to 0) | 0 (0 to 0) | -11.1% (-21.2% to 0.9%)  |
| 40 | Paraguay         | Other transport injuries                        | 0 (0 to 0) | 0 (0 to 0) | -5.1% (-8.6% to -1.4%)   |
| 41 | Paraguay         | Other unintentional injuries                    | 0 (0 to 0) | 0 (0 to 0) | -8.9% (-13.2% to -4.3%)  |
| 42 | Paraguay         | Pedestrian road injuries                        | 0 (0 to 0) | 0 (0 to 0) | -2.6% (-13.9% to 9.8%)   |
| 43 | Paraguay         | Physical violence by firearm                    | 0 (0 to 0) | 0 (0 to 0) | 31.8% (14.4% to 54.3%)   |
| 44 | Paraguay         | Physical violence by other means                | 0 (0 to 0) | 0 (0 to 0) | -5.7% (-14.8% to 3.7%)   |
| 45 |                  |                                                 |            |            |                          |
| 46 |                  |                                                 |            |            |                          |

|    |             |                                                 |             |            |                           |
|----|-------------|-------------------------------------------------|-------------|------------|---------------------------|
| 1  |             |                                                 |             |            |                           |
| 2  | Paraguay    | Physical violence by sharp object               | 0 (0 to 0)  | 0 (0 to 0) | -14.1% (-25.4% to -3.2%)  |
| 3  | Paraguay    | Poisoning by carbon monoxide                    | 0 (0 to 0)  | 0 (0 to 0) | 19.7% (8.5% to 31.3%)     |
| 4  | Paraguay    | Poisoning by other means                        | 0 (0 to 0)  | 0 (0 to 0) | -16.9% (-22.5% to -11.8%) |
| 5  | Paraguay    | Pulmonary aspiration and foreign body in airway | 0 (0 to 0)  | 0 (0 to 0) | -34.6% (-41.7% to -27%)   |
| 6  | Paraguay    | Self-harm by firearm                            | 0 (0 to 0)  | 0 (0 to 0) | 46.5% (31.5% to 63.7%)    |
| 7  | Paraguay    | Self-harm by other specified means              | 0 (0 to 0)  | 0 (0 to 0) | 63.3% (50.9% to 83.3%)    |
| 8  | Paraguay    | Unintentional firearm injuries                  | 0 (0 to 0)  | 0 (0 to 0) | -20.8% (-28.8% to -13.4%) |
| 9  | Peru        | Venomous animal contact                         | 0 (0 to 0)  | 0 (0 to 0) | -13.4% (-17.9% to -8.1%)  |
| 10 | Peru        | Adverse effects of medical treatment            | 0 (0 to 0)  | 0 (0 to 0) | 0% (0% to 0%)             |
| 11 | Peru        | Conflict and terrorism                          | 6 (1 to 17) | 0 (0 to 0) | NA                        |
| 12 | Peru        | Cyclist road injuries                           | 0 (0 to 0)  | 0 (0 to 0) | 0.5% (-8.1% to 9.8%)      |
| 13 | Peru        | Drowning                                        | 0 (0 to 0)  | 0 (0 to 0) | 33.8% (13.1% to 53.3%)    |
| 14 | Peru        | Environmental heat and cold exposure            | 0 (0 to 0)  | 0 (0 to 0) | -4.3% (-8.3% to -0.1%)    |
| 15 | Peru        | Executions and police conflict                  | 0 (0 to 0)  | 0 (0 to 0) | NA                        |
| 16 | Peru        | Exposure to forces of nature                    | 0 (0 to 1)  | 0 (0 to 0) | NA                        |
| 17 | Peru        | Falls                                           | 1 (1 to 2)  | 2 (1 to 2) | 50.3% (44.9% to 56%)      |
| 18 | Peru        | Fire, heat, and hot substances                  | 0 (0 to 0)  | 0 (0 to 0) | -11.4% (-18.9% to -4.7%)  |
| 19 | Peru        | Foreign body in eyes                            | 0 (0 to 0)  | 0 (0 to 0) | 0% (0% to 0%)             |
| 20 | Peru        | Foreign body in other body part                 | 0 (0 to 1)  | 0 (0 to 0) | -30.7% (-37.1% to -24.5%) |
| 21 | Peru        | Motor vehicle road injuries                     | 0 (0 to 1)  | 0 (0 to 0) | -12.7% (-20.1% to -4.8%)  |
| 22 | Peru        | Motorcyclist road injuries                      | 0 (0 to 0)  | 0 (0 to 0) | 25.2% (14.8% to 39.2%)    |
| 23 | Peru        | Non-venomous animal contact                     | 0 (0 to 0)  | 0 (0 to 0) | -9.2% (-13.5% to -4.9%)   |
| 24 | Peru        | Other exposure to mechanical forces             | 0 (0 to 0)  | 0 (0 to 1) | 10% (1.2% to 20.9%)       |
| 25 | Peru        | Other road injuries                             | 0 (0 to 0)  | 0 (0 to 0) | -0.5% (-9.6% to 10.2%)    |
| 26 | Peru        | Other transport injuries                        | 0 (0 to 0)  | 0 (0 to 0) | 3% (-1.7% to 8.4%)        |
| 27 | Peru        | Other unintentional injuries                    | 0 (0 to 0)  | 0 (0 to 0) | -28.6% (-34.5% to -23.1%) |
| 28 | Peru        | Pedestrian road injuries                        | 0 (0 to 0)  | 0 (0 to 0) | -16.4% (-23.9% to -8.5%)  |
| 29 | Peru        | Physical violence by firearm                    | 0 (0 to 0)  | 0 (0 to 0) | 73.3% (48.7% to 103.9%)   |
| 30 | Peru        | Physical violence by other means                | 0 (0 to 0)  | 0 (0 to 0) | -28% (-36.9% to -20.1%)   |
| 31 | Peru        | Physical violence by sharp object               | 0 (0 to 0)  | 0 (0 to 0) | -17.3% (-27.1% to -7.5%)  |
| 32 | Peru        | Poisoning by carbon monoxide                    | 0 (0 to 0)  | 0 (0 to 0) | 44.5% (26.2% to 63.7%)    |
| 33 | Peru        | Poisoning by other means                        | 0 (0 to 0)  | 0 (0 to 0) | -7.6% (-16.3% to 1.3%)    |
| 34 | Peru        | Pulmonary aspiration and foreign body in airway | 0 (0 to 0)  | 0 (0 to 0) | -63.9% (-69.5% to -57.4%) |
| 35 | Peru        | Self-harm by firearm                            | 0 (0 to 0)  | 0 (0 to 0) | 32.7% (19.6% to 52.5%)    |
| 36 | Peru        | Self-harm by other specified means              | 0 (0 to 0)  | 0 (0 to 0) | -4% (-12.8% to 5.1%)      |
| 37 | Peru        | Unintentional firearm injuries                  | 0 (0 to 0)  | 0 (0 to 0) | -15.3% (-24.9% to -7.4%)  |
| 38 | Peru        | Venomous animal contact                         | 0 (0 to 0)  | 0 (0 to 0) | -9.3% (-14% to -4.6%)     |
| 39 | Philippines | Adverse effects of medical treatment            | 0 (0 to 0)  | 0 (0 to 0) | 0% (0% to 0%)             |
| 40 | Philippines | Conflict and terrorism                          | 1 (0 to 4)  | 0 (0 to 1) | NA                        |
| 41 | Philippines | Cyclist road injuries                           | 0 (0 to 0)  | 0 (0 to 0) | -10.1% (-14.6% to -5.7%)  |
| 42 | Philippines | Drowning                                        | 0 (0 to 0)  | 0 (0 to 0) | -37.2% (-40.7% to -33.5%) |
| 43 | Philippines | Environmental heat and cold exposure            | 0 (0 to 0)  | 0 (0 to 0) | -9.2% (-11.1% to -7.5%)   |
| 44 | Philippines | Executions and police conflict                  | 0 (0 to 0)  | 0 (0 to 0) | NA                        |
| 45 |             |                                                 |             |            |                           |
| 46 |             |                                                 |             |            |                           |

|    |             |                                                 |            |            |                           |
|----|-------------|-------------------------------------------------|------------|------------|---------------------------|
| 1  |             |                                                 |            |            |                           |
| 2  | Philippines | Exposure to forces of nature                    | 2 (1 to 4) | 0 (0 to 0) | NA                        |
| 3  | Philippines | Falls                                           | 1 (1 to 2) | 2 (1 to 2) | 24.3% (21.5% to 26.8%)    |
| 4  | Philippines | Fire, heat, and hot substances                  | 0 (0 to 0) | 0 (0 to 0) | -3.8% (-6.6% to -1.7%)    |
| 5  | Philippines | Foreign body in eyes                            | 0 (0 to 0) | 0 (0 to 0) | 0% (0% to 0%)             |
| 6  | Philippines | Foreign body in other body part                 | 0 (0 to 0) | 0 (0 to 0) | -7.1% (-9.7% to -4.5%)    |
| 7  | Philippines | Motor vehicle road injuries                     | 0 (0 to 1) | 0 (0 to 1) | -5.5% (-9.5% to -2.2%)    |
| 8  | Philippines | Motorcyclist road injuries                      | 0 (0 to 1) | 0 (0 to 1) | 19.6% (15% to 25.3%)      |
| 9  | Philippines | Non-venomous animal contact                     | 0 (0 to 0) | 0 (0 to 0) | -11.2% (-13.5% to -8.5%)  |
| 10 | Philippines | Other exposure to mechanical forces             | 0 (0 to 0) | 0 (0 to 0) | -15.3% (-25.2% to -6.8%)  |
| 11 | Philippines | Other road injuries                             | 0 (0 to 0) | 0 (0 to 0) | -13.2% (-17.2% to -8.9%)  |
| 12 | Philippines | Other transport injuries                        | 0 (0 to 0) | 0 (0 to 0) | -8% (-10.2% to -5.8%)     |
| 13 | Philippines | Other unintentional injuries                    | 0 (0 to 0) | 0 (0 to 0) | -14.5% (-16.7% to -12.6%) |
| 14 | Philippines | Pedestrian road injuries                        | 0 (0 to 0) | 0 (0 to 0) | -21.6% (-25% to -18.2%)   |
| 15 | Philippines | Physical violence by firearm                    | 0 (0 to 0) | 0 (0 to 0) | -5.4% (-10.6% to 0.7%)    |
| 16 | Philippines | Physical violence by other means                | 0 (0 to 1) | 0 (0 to 1) | -27% (-30.8% to -23.4%)   |
| 17 | Philippines | Physical violence by sharp object               | 1 (0 to 1) | 0 (0 to 1) | -24.3% (-27.5% to -21.3%) |
| 18 | Philippines | Poisoning by carbon monoxide                    | 0 (0 to 0) | 0 (0 to 0) | 14.9% (11% to 19.3%)      |
| 19 | Philippines | Poisoning by other means                        | 0 (0 to 0) | 0 (0 to 0) | 15.1% (10.6% to 19.8%)    |
| 20 | Philippines | Pulmonary aspiration and foreign body in airway | 0 (0 to 0) | 0 (0 to 0) | -33.6% (-36.3% to -30.3%) |
| 21 | Philippines | Self-harm by firearm                            | 0 (0 to 0) | 0 (0 to 0) | -11% (-20.5% to -1.3%)    |
| 22 | Philippines | Self-harm by other specified means              | 0 (0 to 0) | 0 (0 to 0) | -10.9% (-12.3% to -9.4%)  |
| 23 | Philippines | Unintentional firearm injuries                  | 0 (0 to 0) | 0 (0 to 0) | 43.3% (29.5% to 59.6%)    |
| 24 | Philippines | Venomous animal contact                         | 0 (0 to 0) | 0 (0 to 0) | -44.6% (-48.8% to -41.4%) |
| 25 | Poland      | Adverse effects of medical treatment            | 0 (0 to 0) | 0 (0 to 0) | 0% (0% to 0%)             |
| 26 | Poland      | Conflict and terrorism                          | 0 (0 to 0) | 0 (0 to 0) | NA                        |
| 27 | Poland      | Cyclist road injuries                           | 1 (0 to 1) | 1 (0 to 1) | -17.7% (-21.5% to -13.1%) |
| 28 | Poland      | Drowning                                        | 0 (0 to 0) | 0 (0 to 0) | -7.6% (-17.2% to 2.2%)    |
| 29 | Poland      | Environmental heat and cold exposure            | 0 (0 to 0) | 0 (0 to 0) | -61.1% (-69.6% to -51.1%) |
| 30 | Poland      | Executions and police conflict                  | 0 (0 to 0) | 0 (0 to 0) | NA                        |
| 31 | Poland      | Exposure to forces of nature                    | 0 (0 to 0) | 0 (0 to 0) | NA                        |
| 32 | Poland      | Falls                                           | 6 (4 to 9) | 7 (5 to 9) | 10.8% (7.1% to 14.7%)     |
| 33 | Poland      | Fire, heat, and hot substances                  | 0 (0 to 0) | 0 (0 to 0) | -11.9% (-14.7% to -8.9%)  |
| 34 | Poland      | Foreign body in eyes                            | 0 (0 to 0) | 0 (0 to 0) | 0% (0% to 0%)             |
| 35 | Poland      | Foreign body in other body part                 | 0 (0 to 1) | 0 (0 to 1) | -6.3% (-8.2% to -4.6%)    |
| 36 | Poland      | Motor vehicle road injuries                     | 2 (1 to 3) | 2 (1 to 3) | -16.2% (-20.2% to -11.6%) |
| 37 | Poland      | Motorcyclist road injuries                      | 0 (0 to 1) | 0 (0 to 1) | -24.3% (-28.8% to -19.3%) |
| 38 | Poland      | Non-venomous animal contact                     | 0 (0 to 0) | 0 (0 to 0) | -22.8% (-24.5% to -21.3%) |
| 39 | Poland      | Other exposure to mechanical forces             | 2 (1 to 3) | 1 (1 to 3) | -11.3% (-14.4% to -8.1%)  |
| 40 | Poland      | Other road injuries                             | 0 (0 to 0) | 0 (0 to 0) | -42.6% (-49.2% to -36.7%) |
| 41 | Poland      | Other transport injuries                        | 0 (0 to 0) | 0 (0 to 0) | -31.6% (-34.5% to -29.1%) |
| 42 | Poland      | Other unintentional injuries                    | 1 (0 to 1) | 0 (0 to 0) | -38.7% (-43.1% to -34.6%) |
| 43 | Poland      | Pedestrian road injuries                        | 1 (0 to 1) | 0 (0 to 1) | -62% (-64.7% to -59.4%)   |
| 44 | Poland      | Physical violence by firearm                    | 0 (0 to 0) | 0 (0 to 0) | 49.4% (36.7% to 64.9%)    |
| 45 |             |                                                 |            |            |                           |
| 46 |             |                                                 |            |            |                           |

|    |             |                                                 |            |            |                           |
|----|-------------|-------------------------------------------------|------------|------------|---------------------------|
| 1  |             |                                                 |            |            |                           |
| 2  | Poland      | Physical violence by other means                | 0 (0 to 1) | 0 (0 to 1) | -30.3% (-35.3% to -25.2%) |
| 3  | Poland      | Physical violence by sharp object               | 0 (0 to 0) | 0 (0 to 0) | -41.9% (-48.8% to -34.4%) |
| 4  | Poland      | Poisoning by carbon monoxide                    | 0 (0 to 0) | 0 (0 to 0) | -7.2% (-19.8% to 5.5%)    |
| 5  | Poland      | Poisoning by other means                        | 0 (0 to 0) | 0 (0 to 0) | -21.4% (-30.7% to -11.2%) |
| 6  | Poland      | Pulmonary aspiration and foreign body in airway | 0 (0 to 0) | 0 (0 to 0) | -32.4% (-38.1% to -27.3%) |
| 7  | Poland      | Self-harm by firearm                            | 0 (0 to 0) | 0 (0 to 0) | 5.1% (0.3% to 11.5%)      |
| 8  | Poland      | Self-harm by other specified means              | 0 (0 to 1) | 0 (0 to 1) | -4.5% (-7.6% to -1.2%)    |
| 9  | Poland      | Unintentional firearm injuries                  | 0 (0 to 0) | 0 (0 to 0) | 1.7% (-2.4% to 5.7%)      |
| 10 | Poland      | Venomous animal contact                         | 0 (0 to 0) | 0 (0 to 0) | -19.7% (-21.5% to -17.7%) |
| 11 | Portugal    | Adverse effects of medical treatment            | 0 (0 to 0) | 0 (0 to 0) | 0% (0% to 0%)             |
| 12 | Portugal    | Conflict and terrorism                          | 0 (0 to 0) | 0 (0 to 0) | NA                        |
| 13 | Portugal    | Cyclist road injuries                           | 0 (0 to 1) | 0 (0 to 0) | -52.9% (-59.8% to -45.2%) |
| 14 | Portugal    | Drowning                                        | 0 (0 to 0) | 0 (0 to 0) | 53% (34.2% to 73.4%)      |
| 15 | Portugal    | Environmental heat and cold exposure            | 0 (0 to 0) | 0 (0 to 0) | -4.1% (-8.6% to 0.9%)     |
| 16 | Portugal    | Executions and police conflict                  | 0 (0 to 0) | 0 (0 to 0) | NA                        |
| 17 | Portugal    | Exposure to forces of nature                    | 0 (0 to 0) | 0 (0 to 0) | NA                        |
| 18 | Portugal    | Falls                                           | 4 (3 to 5) | 4 (3 to 5) | -9.8% (-15.5% to -4.4%)   |
| 19 | Portugal    | Fire, heat, and hot substances                  | 0 (0 to 0) | 0 (0 to 0) | -17.2% (-23.4% to -11.7%) |
| 20 | Portugal    | Foreign body in eyes                            | 0 (0 to 0) | 0 (0 to 0) | 0% (0% to 0%)             |
| 21 | Portugal    | Foreign body in other body part                 | 0 (0 to 0) | 0 (0 to 0) | 7.5% (1.5% to 12.6%)      |
| 22 | Portugal    | Motor vehicle road injuries                     | 1 (0 to 1) | 0 (0 to 0) | -60.8% (-67.3% to -54%)   |
| 23 | Portugal    | Motorcyclist road injuries                      | 0 (0 to 0) | 0 (0 to 0) | -26.5% (-39.6% to -11.8%) |
| 24 | Portugal    | Non-venomous animal contact                     | 0 (0 to 0) | 0 (0 to 0) | -3.7% (-8.6% to 1.7%)     |
| 25 | Portugal    | Other exposure to mechanical forces             | 1 (0 to 1) | 0 (0 to 1) | -29.3% (-38.7% to -20.4%) |
| 26 | Portugal    | Other road injuries                             | 0 (0 to 0) | 0 (0 to 0) | -40.2% (-50.4% to -30.1%) |
| 27 | Portugal    | Other transport injuries                        | 0 (0 to 0) | 0 (0 to 0) | 2.3% (-3.9% to 8.7%)      |
| 28 | Portugal    | Other unintentional injuries                    | 0 (0 to 0) | 0 (0 to 0) | -27.9% (-33.7% to -22.4%) |
| 29 | Portugal    | Pedestrian road injuries                        | 0 (0 to 1) | 0 (0 to 0) | -84.9% (-88.1% to -81.1%) |
| 30 | Portugal    | Physical violence by firearm                    | 0 (0 to 0) | 0 (0 to 0) | 12.2% (-4.3% to 34%)      |
| 31 | Portugal    | Physical violence by other means                | 0 (0 to 0) | 0 (0 to 0) | -45.7% (-53.5% to -38.3%) |
| 32 | Portugal    | Physical violence by sharp object               | 0 (0 to 0) | 0 (0 to 0) | -30.5% (-41.4% to -18.6%) |
| 33 | Portugal    | Poisoning by carbon monoxide                    | 0 (0 to 0) | 0 (0 to 0) | 37.3% (26.3% to 49.5%)    |
| 34 | Portugal    | Poisoning by other means                        | 0 (0 to 0) | 0 (0 to 0) | -8.2% (-14.3% to -1.4%)   |
| 35 | Portugal    | Pulmonary aspiration and foreign body in airway | 0 (0 to 0) | 0 (0 to 0) | -24.6% (-32.4% to -15.8%) |
| 36 | Portugal    | Self-harm by firearm                            | 0 (0 to 0) | 0 (0 to 0) | 7.2% (-6.7% to 26.8%)     |
| 37 | Portugal    | Self-harm by other specified means              | 0 (0 to 0) | 0 (0 to 0) | -33.1% (-38% to -28%)     |
| 38 | Portugal    | Unintentional firearm injuries                  | 0 (0 to 0) | 0 (0 to 0) | -23% (-34% to -12.8%)     |
| 39 | Portugal    | Venomous animal contact                         | 0 (0 to 0) | 0 (0 to 0) | -3% (-9.8% to 5.4%)       |
| 40 | Puerto Rico | Adverse effects of medical treatment            | 0 (0 to 0) | 0 (0 to 0) | 0% (0% to 0%)             |
| 41 | Puerto Rico | Conflict and terrorism                          | 0 (0 to 0) | 0 (0 to 0) | NA                        |
| 42 | Puerto Rico | Cyclist road injuries                           | 1 (0 to 2) | 1 (0 to 1) | -23.4% (-32.9% to -12.7%) |
| 43 | Puerto Rico | Drowning                                        | 0 (0 to 0) | 0 (0 to 0) | 64.7% (45.4% to 85.6%)    |
| 44 | Puerto Rico | Environmental heat and cold exposure            | 0 (0 to 0) | 0 (0 to 0) | 3.4% (-0.9% to 7.3%)      |
| 45 |             |                                                 |            |            |                           |
| 46 |             |                                                 |            |            |                           |

|    |             |                                                 |            |             |                           |
|----|-------------|-------------------------------------------------|------------|-------------|---------------------------|
| 1  |             |                                                 |            |             |                           |
| 2  | Puerto Rico | Executions and police conflict                  | 0 (0 to 0) | 0 (0 to 0)  | NA                        |
| 3  | Puerto Rico | Exposure to forces of nature                    | 0 (0 to 0) | 0 (0 to 0)  | NA                        |
| 4  | Puerto Rico | Falls                                           | 6 (4 to 8) | 8 (5 to 11) | 36.8% (31.9% to 42%)      |
| 5  | Puerto Rico | Fire, heat, and hot substances                  | 0 (0 to 0) | 0 (0 to 0)  | 1.1% (-4.7% to 7.2%)      |
| 6  | Puerto Rico | Foreign body in eyes                            | 0 (0 to 0) | 0 (0 to 0)  | 0% (0% to 0%)             |
| 7  | Puerto Rico | Foreign body in other body part                 | 0 (0 to 0) | 0 (0 to 0)  | 3.4% (-1.1% to 8.3%)      |
| 8  | Puerto Rico | Motor vehicle road injuries                     | 1 (1 to 3) | 1 (0 to 1)  | -49.4% (-56.7% to -41.7%) |
| 9  | Puerto Rico | Motorcyclist road injuries                      | 1 (0 to 1) | 1 (0 to 1)  | 33.9% (14.3% to 59%)      |
| 10 | Puerto Rico | Non-venomous animal contact                     | 0 (0 to 0) | 0 (0 to 0)  | -9.6% (-14% to -5.3%)     |
| 11 | Puerto Rico | Other exposure to mechanical forces             | 0 (0 to 1) | 1 (0 to 1)  | 15.6% (9.9% to 20.6%)     |
| 12 | Puerto Rico | Other road injuries                             | 0 (0 to 0) | 0 (0 to 0)  | -20% (-30.1% to -7.4%)    |
| 13 | Puerto Rico | Other transport injuries                        | 0 (0 to 0) | 0 (0 to 0)  | 0.1% (-5.5% to 6%)        |
| 14 | Puerto Rico | Other unintentional injuries                    | 0 (0 to 1) | 0 (0 to 1)  | -5.3% (-11.6% to -0.3%)   |
| 15 | Puerto Rico | Pedestrian road injuries                        | 1 (1 to 2) | 1 (0 to 1)  | -48.2% (-54.8% to -40.9%) |
| 16 | Puerto Rico | Physical violence by firearm                    | 0 (0 to 0) | 0 (0 to 1)  | 25.8% (3.3% to 60.7%)     |
| 17 | Puerto Rico | Physical violence by other means                | 0 (0 to 1) | 0 (0 to 0)  | -18.3% (-28% to -7.2%)    |
| 18 | Puerto Rico | Physical violence by sharp object               | 0 (0 to 0) | 0 (0 to 0)  | -26.3% (-37.9% to -12.4%) |
| 19 | Puerto Rico | Poisoning by carbon monoxide                    | 0 (0 to 0) | 0 (0 to 0)  | -18.5% (-32% to -5.5%)    |
| 20 | Puerto Rico | Poisoning by other means                        | 0 (0 to 0) | 0 (0 to 0)  | -41.4% (-51.1% to -32%)   |
| 21 | Puerto Rico | Pulmonary aspiration and foreign body in airway | 0 (0 to 0) | 0 (0 to 0)  | -17.4% (-24.1% to -8.3%)  |
| 22 | Puerto Rico | Self-harm by firearm                            | 0 (0 to 0) | 0 (0 to 0)  | -32.7% (-43.6% to -23.3%) |
| 23 | Puerto Rico | Self-harm by other specified means              | 0 (0 to 0) | 0 (0 to 0)  | -17.1% (-25% to -8.8%)    |
| 24 | Puerto Rico | Unintentional firearm injuries                  | 0 (0 to 0) | 0 (0 to 0)  | 15.8% (4.6% to 27.3%)     |
| 25 | Puerto Rico | Venomous animal contact                         | 0 (0 to 0) | 0 (0 to 0)  | -9.4% (-15% to -3.9%)     |
| 26 | Qatar       | Adverse effects of medical treatment            | 0 (0 to 0) | 0 (0 to 0)  | 0% (0% to 0%)             |
| 27 | Qatar       | Conflict and terrorism                          | 0 (0 to 0) | 0 (0 to 0)  | NA                        |
| 28 | Qatar       | Cyclist road injuries                           | 0 (0 to 0) | 0 (0 to 0)  | -35.3% (-42.6% to -27.1%) |
| 29 | Qatar       | Drowning                                        | 0 (0 to 0) | 0 (0 to 0)  | 80.9% (54.1% to 109.8%)   |
| 30 | Qatar       | Environmental heat and cold exposure            | 0 (0 to 0) | 0 (0 to 0)  | -6.3% (-11.8% to -0.9%)   |
| 31 | Qatar       | Executions and police conflict                  | 0 (0 to 0) | 0 (0 to 0)  | NA                        |
| 32 | Qatar       | Exposure to forces of nature                    | 0 (0 to 0) | 0 (0 to 0)  | NA                        |
| 33 | Qatar       | Falls                                           | 3 (2 to 4) | 4 (3 to 5)  | 24.3% (18.5% to 30.3%)    |
| 34 | Qatar       | Fire, heat, and hot substances                  | 0 (0 to 0) | 0 (0 to 0)  | -33% (-39.3% to -26.3%)   |
| 35 | Qatar       | Foreign body in eyes                            | 0 (0 to 0) | 0 (0 to 0)  | 0% (0% to 0%)             |
| 36 | Qatar       | Foreign body in other body part                 | 0 (0 to 0) | 0 (0 to 0)  | 0.7% (-2.9% to 4.9%)      |
| 37 | Qatar       | Motor vehicle road injuries                     | 1 (1 to 2) | 1 (0 to 1)  | -30.9% (-36.8% to -24.6%) |
| 38 | Qatar       | Motorcyclist road injuries                      | 0 (0 to 0) | 0 (0 to 0)  | -30.3% (-38.7% to -20.1%) |
| 39 | Qatar       | Non-venomous animal contact                     | 0 (0 to 0) | 0 (0 to 0)  | -1.2% (-6% to 4.2%)       |
| 40 | Qatar       | Other exposure to mechanical forces             | 1 (0 to 1) | 0 (0 to 1)  | -27.1% (-33.5% to -21.6%) |
| 41 | Qatar       | Other road injuries                             | 0 (0 to 0) | 0 (0 to 0)  | -14.1% (-24.2% to -2.8%)  |
| 42 | Qatar       | Other transport injuries                        | 0 (0 to 0) | 0 (0 to 0)  | -22% (-28.4% to -15.7%)   |
| 43 | Qatar       | Other unintentional injuries                    | 0 (0 to 0) | 0 (0 to 0)  | -13.9% (-19.2% to -8.3%)  |
| 44 | Qatar       | Pedestrian road injuries                        | 0 (0 to 1) | 0 (0 to 0)  | -40.8% (-47.1% to -33%)   |
| 45 |             |                                                 |            |             |                           |
| 46 |             |                                                 |            |             |                           |

|    |                     |                                                 |            |            |                           |
|----|---------------------|-------------------------------------------------|------------|------------|---------------------------|
| 1  |                     |                                                 |            |            |                           |
| 2  | Qatar               | Physical violence by firearm                    | 0 (0 to 0) | 0 (0 to 0) | 126.5% (94% to 169.6%)    |
| 3  | Qatar               | Physical violence by other means                | 0 (0 to 0) | 0 (0 to 0) | -2.2% (-12.8% to 6.2%)    |
| 4  | Qatar               | Physical violence by sharp object               | 0 (0 to 0) | 0 (0 to 0) | 3.1% (-8.4% to 16%)       |
| 5  | Qatar               | Poisoning by carbon monoxide                    | 0 (0 to 0) | 0 (0 to 0) | 38.3% (25.3% to 53.8%)    |
| 6  | Qatar               | Poisoning by other means                        | 0 (0 to 0) | 0 (0 to 0) | -9.4% (-15.6% to -2.8%)   |
| 7  | Qatar               | Pulmonary aspiration and foreign body in airway | 0 (0 to 0) | 0 (0 to 0) | -18.7% (-28.1% to -7.3%)  |
| 8  | Qatar               | Self-harm by firearm                            | 0 (0 to 0) | 0 (0 to 0) | 33.7% (17% to 56.8%)      |
| 9  | Qatar               | Self-harm by other specified means              | 0 (0 to 0) | 0 (0 to 0) | -4.7% (-11.9% to 2.5%)    |
| 10 | Qatar               | Unintentional firearm injuries                  | 0 (0 to 0) | 0 (0 to 0) | -1.8% (-10.9% to 9.3%)    |
| 11 | Republic of Korea   | Venomous animal contact                         | 0 (0 to 0) | 0 (0 to 0) | -1.7% (-8.1% to 6.5%)     |
| 12 | Republic of Korea   | Adverse effects of medical treatment            | 0 (0 to 0) | 0 (0 to 0) | 0% (0% to 0%)             |
| 13 | Republic of Korea   | Conflict and terrorism                          | 0 (0 to 0) | 0 (0 to 0) | NA                        |
| 14 | Republic of Korea   | Cyclist road injuries                           | 0 (0 to 1) | 0 (0 to 0) | -41.4% (-49.3% to -32.3%) |
| 15 | Republic of Korea   | Drowning                                        | 0 (0 to 0) | 0 (0 to 0) | 153.6% (124.1% to 187.2%) |
| 16 | Republic of Korea   | Environmental heat and cold exposure            | 0 (0 to 0) | 0 (0 to 0) | -8.8% (-14% to -3.7%)     |
| 17 | Republic of Korea   | Executions and police conflict                  | 0 (0 to 0) | 0 (0 to 0) | NA                        |
| 18 | Republic of Korea   | Exposure to forces of nature                    | 0 (0 to 0) | 0 (0 to 0) | NA                        |
| 19 | Republic of Korea   | Falls                                           | 5 (3 to 6) | 5 (4 to 7) | 15.2% (8.7% to 21.5%)     |
| 20 | Republic of Korea   | Fire, heat, and hot substances                  | 0 (0 to 0) | 0 (0 to 0) | -15% (-22.7% to -8.1%)    |
| 21 | Republic of Korea   | Foreign body in eyes                            | 0 (0 to 0) | 0 (0 to 0) | 0% (0% to 0%)             |
| 22 | Republic of Korea   | Foreign body in other body part                 | 0 (0 to 1) | 0 (0 to 1) | 9.3% (5.9% to 12.9%)      |
| 23 | Republic of Korea   | Motor vehicle road injuries                     | 1 (0 to 1) | 0 (0 to 1) | -46.3% (-52.8% to -38.4%) |
| 24 | Republic of Korea   | Motorcyclist road injuries                      | 0 (0 to 1) | 0 (0 to 0) | -51.4% (-58.8% to -42.9%) |
| 25 | Republic of Korea   | Non-venomous animal contact                     | 0 (0 to 0) | 0 (0 to 0) | -9.3% (-13.4% to -4.7%)   |
| 26 | Republic of Korea   | Other exposure to mechanical forces             | 1 (0 to 2) | 1 (0 to 2) | -2.8% (-11.6% to 5.7%)    |
| 27 | Republic of Korea   | Other road injuries                             | 0 (0 to 0) | 0 (0 to 0) | -32.2% (-43.4% to -19.6%) |
| 28 | Republic of Korea   | Other transport injuries                        | 0 (0 to 1) | 0 (0 to 0) | -32% (-38.4% to -24.6%)   |
| 29 | Republic of Korea   | Other unintentional injuries                    | 1 (0 to 1) | 0 (0 to 1) | -30.3% (-37.3% to -23.2%) |
| 30 | Republic of Korea   | Pedestrian road injuries                        | 0 (0 to 0) | 0 (0 to 0) | -60.6% (-65.7% to -55.2%) |
| 31 | Republic of Korea   | Physical violence by firearm                    | 0 (0 to 0) | 0 (0 to 0) | 90.4% (61.5% to 128.6%)   |
| 32 | Republic of Korea   | Physical violence by other means                | 0 (0 to 0) | 0 (0 to 0) | -13.8% (-24% to -3.9%)    |
| 33 | Republic of Korea   | Physical violence by sharp object               | 0 (0 to 0) | 0 (0 to 0) | -39.9% (-51% to -29.5%)   |
| 34 | Republic of Korea   | Poisoning by carbon monoxide                    | 0 (0 to 0) | 0 (0 to 0) | -27.7% (-39.7% to -13.9%) |
| 35 | Republic of Korea   | Poisoning by other means                        | 0 (0 to 0) | 0 (0 to 0) | -26.1% (-35.7% to -15.8%) |
| 36 | Republic of Korea   | Pulmonary aspiration and foreign body in airway | 0 (0 to 0) | 0 (0 to 0) | -41.6% (-48.1% to -35.1%) |
| 37 | Republic of Korea   | Self-harm by firearm                            | 0 (0 to 0) | 0 (0 to 0) | 74.3% (40% to 112.5%)     |
| 38 | Republic of Korea   | Self-harm by other specified means              | 0 (0 to 1) | 1 (0 to 1) | 83.3% (69.5% to 96.3%)    |
| 39 | Republic of Korea   | Unintentional firearm injuries                  | 0 (0 to 0) | 0 (0 to 0) | 19.6% (7.7% to 34.9%)     |
| 40 | Republic of Korea   | Venomous animal contact                         | 0 (0 to 0) | 0 (0 to 0) | -17.6% (-23.4% to -12%)   |
| 41 | Republic of Moldova | Adverse effects of medical treatment            | 0 (0 to 0) | 0 (0 to 0) | 0% (0% to 0%)             |
| 42 | Republic of Moldova | Conflict and terrorism                          | 0 (0 to 0) | 0 (0 to 0) | NA                        |
| 43 | Republic of Moldova | Cyclist road injuries                           | 1 (0 to 1) | 0 (0 to 1) | -36.7% (-43.6% to -29%)   |
| 44 | Republic of Moldova | Drowning                                        | 0 (0 to 0) | 0 (0 to 0) | 19.1% (7.5% to 31%)       |
| 45 |                     |                                                 |            |            |                           |
| 46 |                     |                                                 |            |            |                           |



|    |                     |                                                 |            |            |                           |
|----|---------------------|-------------------------------------------------|------------|------------|---------------------------|
| 1  |                     |                                                 |            |            |                           |
| 2  | Republic of Moldova | Environmental heat and cold exposure            | 0 (0 to 0) | 0 (0 to 1) | 18% (9.3% to 28.4%)       |
| 3  | Republic of Moldova | Executions and police conflict                  | 0 (0 to 0) | 0 (0 to 0) | NA                        |
| 4  | Republic of Moldova | Exposure to forces of nature                    | 0 (0 to 0) | 0 (0 to 0) | NA                        |
| 5  | Republic of Moldova | Falls                                           | 5 (4 to 6) | 4 (3 to 6) | -13.6% (-18.1% to -8%)    |
| 6  | Republic of Moldova | Fire, heat, and hot substances                  | 0 (0 to 0) | 0 (0 to 0) | -27.6% (-34% to -21%)     |
| 7  | Republic of Moldova | Foreign body in eyes                            | 0 (0 to 0) | 0 (0 to 0) | 0% (0% to 0%)             |
| 8  | Republic of Moldova | Foreign body in other body part                 | 0 (0 to 0) | 0 (0 to 0) | 0.9% (-2.8% to 5.2%)      |
| 9  | Republic of Moldova | Motor vehicle road injuries                     | 2 (1 to 4) | 1 (1 to 2) | -32.5% (-39.8% to -24.3%) |
| 10 | Republic of Moldova | Motorcyclist road injuries                      | 0 (0 to 1) | 0 (0 to 0) | -51% (-59.1% to -41.7%)   |
| 11 | Republic of Moldova | Non-venomous animal contact                     | 0 (0 to 0) | 0 (0 to 0) | 0.7% (-3.4% to 4.6%)      |
| 12 | Republic of Moldova | Other exposure to mechanical forces             | 1 (0 to 2) | 1 (0 to 1) | -19% (-26.7% to -11.7%)   |
| 13 | Republic of Moldova | Other road injuries                             | 0 (0 to 0) | 0 (0 to 0) | -41.6% (-49% to -33.5%)   |
| 14 | Republic of Moldova | Other transport injuries                        | 0 (0 to 0) | 0 (0 to 0) | -23.1% (-29.1% to -16.8%) |
| 15 | Republic of Moldova | Other unintentional injuries                    | 0 (0 to 1) | 0 (0 to 0) | -41.6% (-47% to -34.7%)   |
| 16 | Republic of Moldova | Pedestrian road injuries                        | 1 (0 to 1) | 0 (0 to 1) | -56.6% (-62.2% to -51.1%) |
| 17 | Republic of Moldova | Physical violence by firearm                    | 0 (0 to 0) | 0 (0 to 0) | 11.2% (-12.5% to 37.3%)   |
| 18 | Republic of Moldova | Physical violence by other means                | 1 (0 to 1) | 0 (0 to 1) | -46.5% (-53.2% to -38.5%) |
| 19 | Republic of Moldova | Physical violence by sharp object               | 0 (0 to 0) | 0 (0 to 0) | -33.2% (-43.4% to -20.6%) |
| 20 | Republic of Moldova | Poisoning by carbon monoxide                    | 0 (0 to 0) | 0 (0 to 0) | -0.9% (-9% to 8.3%)       |
| 21 | Republic of Moldova | Poisoning by other means                        | 0 (0 to 0) | 0 (0 to 0) | -27.2% (-35.3% to -18.6%) |
| 22 | Republic of Moldova | Pulmonary aspiration and foreign body in airway | 0 (0 to 0) | 0 (0 to 0) | -4% (-10.5% to 4.1%)      |
| 23 | Republic of Moldova | Self-harm by firearm                            | 0 (0 to 0) | 0 (0 to 0) | -6.2% (-17.9% to 9.2%)    |
| 24 | Republic of Moldova | Self-harm by other specified means              | 0 (0 to 1) | 0 (0 to 0) | -16.9% (-21.9% to -10.8%) |
| 25 | Republic of Moldova | Unintentional firearm injuries                  | 0 (0 to 0) | 0 (0 to 0) | -18.2% (-28.9% to -7.9%)  |
| 26 | Republic of Moldova | Venomous animal contact                         | 0 (0 to 0) | 0 (0 to 0) | 6.4% (0.5% to 13%)        |
| 27 | Romania             | Adverse effects of medical treatment            | 0 (0 to 0) | 0 (0 to 0) | 0% (0% to 0%)             |
| 28 | Romania             | Conflict and terrorism                          | 0 (0 to 1) | 0 (0 to 0) | NA                        |
| 29 | Romania             | Cyclist road injuries                           | 1 (0 to 1) | 0 (0 to 1) | -16.3% (-25.5% to -5.1%)  |
| 30 | Romania             | Drowning                                        | 0 (0 to 0) | 0 (0 to 0) | 41.1% (24.3% to 59.5%)    |
| 31 | Romania             | Environmental heat and cold exposure            | 0 (0 to 0) | 0 (0 to 0) | -15.3% (-20.1% to -11%)   |
| 32 | Romania             | Executions and police conflict                  | 0 (0 to 0) | 0 (0 to 0) | NA                        |
| 33 | Romania             | Exposure to forces of nature                    | 0 (0 to 0) | 0 (0 to 0) | NA                        |
| 34 | Romania             | Falls                                           | 6 (5 to 8) | 6 (4 to 8) | -9.8% (-15.3% to -3.9%)   |
| 35 | Romania             | Fire, heat, and hot substances                  | 0 (0 to 0) | 0 (0 to 0) | -24.9% (-30.2% to -19.8%) |
| 36 | Romania             | Foreign body in eyes                            | 0 (0 to 0) | 0 (0 to 0) | 0% (0% to 0%)             |
| 37 | Romania             | Foreign body in other body part                 | 0 (0 to 0) | 0 (0 to 0) | 0.9% (-3.3% to 5.3%)      |
| 38 | Romania             | Motor vehicle road injuries                     | 1 (1 to 3) | 1 (1 to 2) | -18.5% (-26.6% to -9.1%)  |
| 39 | Romania             | Motorcyclist road injuries                      | 0 (0 to 0) | 0 (0 to 0) | -23.4% (-35% to -10.6%)   |
| 40 | Romania             | Non-venomous animal contact                     | 0 (0 to 0) | 0 (0 to 0) | -12.6% (-16% to -8.7%)    |
| 41 | Romania             | Other exposure to mechanical forces             | 2 (1 to 3) | 2 (1 to 3) | -12.7% (-19.2% to -6%)    |
| 42 | Romania             | Other road injuries                             | 0 (0 to 0) | 0 (0 to 0) | -29.5% (-38.9% to -20%)   |
| 43 | Romania             | Other transport injuries                        | 0 (0 to 0) | 0 (0 to 0) | -12.7% (-17.6% to -7.6%)  |
| 44 | Romania             | Other unintentional injuries                    | 0 (0 to 1) | 0 (0 to 0) | -16.7% (-23.5% to -9.6%)  |
| 45 |                     |                                                 |            |            |                           |
| 46 |                     |                                                 |            |            |                           |

|    |                    |                                                 |              |            |                           |
|----|--------------------|-------------------------------------------------|--------------|------------|---------------------------|
| 1  |                    |                                                 |              |            |                           |
| 2  | Romania            | Pedestrian road injuries                        | 0 (0 to 1)   | 0 (0 to 0) | -48.4% (-55.1% to -40.7%) |
| 3  | Romania            | Physical violence by firearm                    | 0 (0 to 0)   | 0 (0 to 0) | 104.3% (77.2% to 137.5%)  |
| 4  | Romania            | Physical violence by other means                | 0 (0 to 1)   | 0 (0 to 1) | -35.9% (-44.9% to -24.9%) |
| 5  | Romania            | Physical violence by sharp object               | 0 (0 to 0)   | 0 (0 to 0) | -41.3% (-52.1% to -30.5%) |
| 6  | Romania            | Poisoning by carbon monoxide                    | 0 (0 to 0)   | 0 (0 to 0) | -4.7% (-19.9% to 11.7%)   |
| 7  | Romania            | Poisoning by other means                        | 0 (0 to 0)   | 0 (0 to 0) | -49.5% (-59.2% to -39.9%) |
| 8  | Romania            | Pulmonary aspiration and foreign body in airway | 0 (0 to 0)   | 0 (0 to 0) | -20.7% (-28.5% to -13.3%) |
| 9  | Romania            | Self-harm by firearm                            | 0 (0 to 0)   | 0 (0 to 0) | 36% (17.1% to 63.1%)      |
| 10 | Romania            | Self-harm by other specified means              | 0 (0 to 0)   | 0 (0 to 0) | 6.8% (1% to 13.1%)        |
| 11 | Romania            | Unintentional firearm injuries                  | 0 (0 to 0)   | 0 (0 to 0) | 1.3% (-9.3% to 13%)       |
| 12 | Romania            | Venomous animal contact                         | 0 (0 to 0)   | 0 (0 to 0) | -17.3% (-21.7% to -12.9%) |
| 13 | Russian Federation | Adverse effects of medical treatment            | 0 (0 to 0)   | 0 (0 to 0) | 0% (0% to 0%)             |
| 14 | Russian Federation | Conflict and terrorism                          | 0 (0 to 0)   | 0 (0 to 0) | NA                        |
| 15 | Russian Federation | Cyclist road injuries                           | 1 (0 to 1)   | 1 (0 to 1) | -19.3% (-23.6% to -14.6%) |
| 16 | Russian Federation | Drowning                                        | 0 (0 to 0)   | 0 (0 to 0) | -49.1% (-51.9% to -46.1%) |
| 17 | Russian Federation | Environmental heat and cold exposure            | 1 (0 to 1)   | 0 (0 to 1) | -43.8% (-47.1% to -40.1%) |
| 18 | Russian Federation | Executions and police conflict                  | 0 (0 to 0)   | 0 (0 to 0) | NA                        |
| 19 | Russian Federation | Exposure to forces of nature                    | 0 (0 to 0)   | 0 (0 to 0) | NA                        |
| 20 | Russian Federation | Falls                                           | 5 (4 to 7)   | 6 (4 to 8) | 7.1% (4.4% to 9.5%)       |
| 21 | Russian Federation | Fire, heat, and hot substances                  | 0 (0 to 0)   | 0 (0 to 0) | -24% (-26.9% to -21.8%)   |
| 22 | Russian Federation | Foreign body in eyes                            | 0 (0 to 0)   | 0 (0 to 0) | 0% (0% to 0%)             |
| 23 | Russian Federation | Foreign body in other body part                 | 0 (0 to 0)   | 0 (0 to 0) | -0.1% (-0.9% to 0.8%)     |
| 24 | Russian Federation | Motor vehicle road injuries                     | 3 (2 to 5)   | 3 (1 to 5) | -14.5% (-17.9% to -9.9%)  |
| 25 | Russian Federation | Motorcyclist road injuries                      | 0 (0 to 1)   | 0 (0 to 0) | -26.5% (-30.6% to -22.2%) |
| 26 | Russian Federation | Non-venomous animal contact                     | 0 (0 to 0)   | 0 (0 to 0) | -10.6% (-12.9% to -8.6%)  |
| 27 | Russian Federation | Other exposure to mechanical forces             | 1 (1 to 3)   | 1 (0 to 2) | -33.1% (-36.5% to -30.3%) |
| 28 | Russian Federation | Other road injuries                             | 0 (0 to 0)   | 0 (0 to 0) | -15.1% (-20.2% to -9.6%)  |
| 29 | Russian Federation | Other transport injuries                        | 0 (0 to 0)   | 0 (0 to 0) | -2.6% (-4.1% to -1%)      |
| 30 | Russian Federation | Other unintentional injuries                    | 0 (0 to 1)   | 0 (0 to 0) | -23.3% (-26.1% to -20.3%) |
| 31 | Russian Federation | Pedestrian road injuries                        | 1 (1 to 2)   | 1 (0 to 1) | -58.6% (-61.2% to -55.9%) |
| 32 | Russian Federation | Physical violence by firearm                    | 0 (0 to 0)   | 0 (0 to 0) | -17.2% (-25.9% to -8.7%)  |
| 33 | Russian Federation | Physical violence by other means                | 1 (0 to 1)   | 1 (0 to 1) | -32.3% (-34.5% to -29.5%) |
| 34 | Russian Federation | Physical violence by sharp object               | 0 (0 to 1)   | 0 (0 to 0) | -46.5% (-50.2% to -42.9%) |
| 35 | Russian Federation | Poisoning by carbon monoxide                    | 0 (0 to 0)   | 0 (0 to 0) | -30.5% (-34.7% to -25.7%) |
| 36 | Russian Federation | Poisoning by other means                        | 0 (0 to 0)   | 0 (0 to 0) | -28.7% (-33.8% to -23.7%) |
| 37 | Russian Federation | Pulmonary aspiration and foreign body in airway | 0 (0 to 0)   | 0 (0 to 0) | -7.8% (-11% to -4.2%)     |
| 38 | Russian Federation | Self-harm by firearm                            | 0 (0 to 0)   | 0 (0 to 0) | -25.3% (-30.4% to -19.7%) |
| 39 | Russian Federation | Self-harm by other specified means              | 1 (0 to 1)   | 1 (0 to 1) | -20.8% (-23% to -18.5%)   |
| 40 | Russian Federation | Unintentional firearm injuries                  | 0 (0 to 0)   | 0 (0 to 0) | -22.8% (-29.4% to -17.1%) |
| 41 | Russian Federation | Venomous animal contact                         | 0 (0 to 0)   | 0 (0 to 0) | -7.6% (-10.1% to -5.4%)   |
| 42 | Rwanda             | Adverse effects of medical treatment            | 0 (0 to 0)   | 0 (0 to 0) | 0% (0% to 0%)             |
| 43 | Rwanda             | Conflict and terrorism                          | 11 (2 to 34) | 0 (0 to 0) | NA                        |
| 44 | Rwanda             | Cyclist road injuries                           | 3 (1 to 5)   | 2 (1 to 4) | -28% (-33.5% to -22.6%)   |
| 45 |                    |                                                 |              |            |                           |
| 46 |                    |                                                 |              |            |                           |

|    |                       |                                                 |            |            |                           |
|----|-----------------------|-------------------------------------------------|------------|------------|---------------------------|
| 1  |                       |                                                 |            |            |                           |
| 2  | Rwanda                | Drowning                                        | 0 (0 to 0) | 0 (0 to 0) | -13.5% (-21.7% to -4.5%)  |
| 3  | Rwanda                | Environmental heat and cold exposure            | 0 (0 to 0) | 0 (0 to 0) | -13.1% (-19.6% to -6.9%)  |
| 4  | Rwanda                | Executions and police conflict                  | 0 (0 to 0) | 0 (0 to 0) | NA                        |
| 5  | Rwanda                | Exposure to forces of nature                    | 0 (0 to 0) | 0 (0 to 0) | NA                        |
| 6  | Rwanda                | Falls                                           | 3 (2 to 5) | 4 (3 to 6) | 27% (22.2% to 31.8%)      |
| 7  | Rwanda                | Fire, heat, and hot substances                  | 0 (0 to 0) | 0 (0 to 0) | -22.5% (-28.4% to -16.8%) |
| 8  | Rwanda                | Foreign body in eyes                            | 0 (0 to 0) | 0 (0 to 0) | 0% (0% to 0%)             |
| 9  | Rwanda                | Foreign body in other body part                 | 1 (0 to 1) | 1 (0 to 1) | -2.9% (-7.1% to 2.4%)     |
| 10 | Rwanda                | Motor vehicle road injuries                     | 1 (0 to 2) | 1 (0 to 2) | -18.6% (-25.8% to -9.7%)  |
| 11 | Rwanda                | Motorcyclist road injuries                      | 1 (1 to 3) | 1 (1 to 2) | -17.7% (-23.9% to -11.2%) |
| 12 | Rwanda                | Non-venomous animal contact                     | 0 (0 to 1) | 0 (0 to 1) | -25.5% (-29.6% to -20.9%) |
| 13 | Rwanda                | Other exposure to mechanical forces             | 0 (0 to 0) | 0 (0 to 0) | -11.5% (-18.3% to -4.9%)  |
| 14 | Rwanda                | Other road injuries                             | 0 (0 to 0) | 0 (0 to 0) | -6.7% (-15% to 2.8%)      |
| 15 | Rwanda                | Other transport injuries                        | 1 (0 to 1) | 0 (0 to 1) | -28.8% (-33.7% to -23.2%) |
| 16 | Rwanda                | Other unintentional injuries                    | 0 (0 to 1) | 0 (0 to 0) | -23.5% (-29.1% to -17.5%) |
| 17 | Rwanda                | Pedestrian road injuries                        | 3 (1 to 6) | 2 (1 to 4) | -29.4% (-34.6% to -24.1%) |
| 18 | Rwanda                | Physical violence by firearm                    | 0 (0 to 0) | 0 (0 to 0) | 7.7% (-9.8% to 28.8%)     |
| 19 | Rwanda                | Physical violence by other means                | 0 (0 to 0) | 0 (0 to 0) | -29.3% (-34.6% to -23.9%) |
| 20 | Rwanda                | Physical violence by sharp object               | 0 (0 to 0) | 0 (0 to 0) | -18.5% (-25.8% to -10.1%) |
| 21 | Rwanda                | Poisoning by carbon monoxide                    | 0 (0 to 0) | 0 (0 to 0) | 18.7% (5.5% to 34.5%)     |
| 22 | Rwanda                | Poisoning by other means                        | 0 (0 to 0) | 0 (0 to 0) | -26.5% (-33.9% to -17.2%) |
| 23 | Rwanda                | Pulmonary aspiration and foreign body in airway | 0 (0 to 0) | 0 (0 to 0) | -15.9% (-25.9% to -5.7%)  |
| 24 | Rwanda                | Self-harm by firearm                            | 0 (0 to 0) | 0 (0 to 0) | -0.7% (-13.5% to 17.2%)   |
| 25 | Rwanda                | Self-harm by other specified means              | 0 (0 to 0) | 0 (0 to 0) | -35.2% (-39.6% to -31%)   |
| 26 | Rwanda                | Unintentional firearm injuries                  | 0 (0 to 0) | 0 (0 to 0) | -26.6% (-35.2% to -18.4%) |
| 27 | Rwanda                | Venomous animal contact                         | 0 (0 to 0) | 0 (0 to 0) | -33% (-40.5% to -25.3%)   |
| 28 | Saint Kitts and Nevis | Adverse effects of medical treatment            | 0 (0 to 0) | 0 (0 to 0) | 0% (0% to 0%)             |
| 29 | Saint Kitts and Nevis | Conflict and terrorism                          | 0 (0 to 0) | 0 (0 to 0) | NA                        |
| 30 | Saint Kitts and Nevis | Cyclist road injuries                           | 1 (0 to 2) | 1 (0 to 1) | -17.5% (-28.2% to -6.4%)  |
| 31 | Saint Kitts and Nevis | Drowning                                        | 0 (0 to 0) | 0 (0 to 0) | 30.5% (16.3% to 43.4%)    |
| 32 | Saint Kitts and Nevis | Environmental heat and cold exposure            | 0 (0 to 0) | 0 (0 to 0) | 2% (-1.7% to 6%)          |
| 33 | Saint Kitts and Nevis | Executions and police conflict                  | 0 (0 to 0) | 0 (0 to 0) | NA                        |
| 34 | Saint Kitts and Nevis | Exposure to forces of nature                    | 0 (0 to 0) | 0 (0 to 0) | NA                        |
| 35 | Saint Kitts and Nevis | Falls                                           | 5 (3 to 7) | 6 (4 to 9) | 29.4% (24.3% to 33.9%)    |
| 36 | Saint Kitts and Nevis | Fire, heat, and hot substances                  | 1 (0 to 1) | 0 (0 to 1) | -34.4% (-39.8% to -29%)   |
| 37 | Saint Kitts and Nevis | Foreign body in eyes                            | 0 (0 to 0) | 0 (0 to 0) | 0% (0% to 0%)             |
| 38 | Saint Kitts and Nevis | Foreign body in other body part                 | 0 (0 to 1) | 0 (0 to 0) | -1.5% (-5.6% to 3.6%)     |
| 39 | Saint Kitts and Nevis | Motor vehicle road injuries                     | 1 (0 to 2) | 1 (0 to 1) | -27.9% (-37% to -17.2%)   |
| 40 | Saint Kitts and Nevis | Motorcyclist road injuries                      | 1 (0 to 1) | 1 (0 to 1) | 18.8% (3.7% to 39.4%)     |
| 41 | Saint Kitts and Nevis | Non-venomous animal contact                     | 0 (0 to 0) | 0 (0 to 0) | -4.5% (-10% to 2%)        |
| 42 | Saint Kitts and Nevis | Other exposure to mechanical forces             | 1 (0 to 1) | 1 (0 to 1) | 8% (-0.9% to 17%)         |
| 43 | Saint Kitts and Nevis | Other road injuries                             | 0 (0 to 0) | 0 (0 to 0) | -1.6% (-14.7% to 13.7%)   |
| 44 | Saint Kitts and Nevis | Other transport injuries                        | 0 (0 to 0) | 0 (0 to 0) | 4.7% (-0.4% to 9.8%)      |
| 45 |                       |                                                 |            |            |                           |
| 46 |                       |                                                 |            |            |                           |

|    |                                  |                                                 |            |            |                           |
|----|----------------------------------|-------------------------------------------------|------------|------------|---------------------------|
| 1  |                                  |                                                 |            |            |                           |
| 2  | Saint Kitts and Nevis            | Other unintentional injuries                    | 0 (0 to 1) | 0 (0 to 1) | -9.3% (-14.6% to -4.2%)   |
| 3  | Saint Kitts and Nevis            | Pedestrian road injuries                        | 1 (0 to 1) | 1 (0 to 1) | -34.4% (-43% to -25.7%)   |
| 4  | Saint Kitts and Nevis            | Physical violence by firearm                    | 0 (0 to 0) | 0 (0 to 0) | 241.3% (170.5% to 355.1%) |
| 5  | Saint Kitts and Nevis            | Physical violence by other means                | 0 (0 to 0) | 0 (0 to 0) | 19.4% (2.5% to 38.1%)     |
| 6  | Saint Kitts and Nevis            | Physical violence by sharp object               | 0 (0 to 0) | 0 (0 to 0) | 38.3% (14.5% to 67.2%)    |
| 7  | Saint Kitts and Nevis            | Poisoning by carbon monoxide                    | 0 (0 to 0) | 0 (0 to 0) | 19.6% (5.4% to 35.1%)     |
| 8  | Saint Kitts and Nevis            | Poisoning by other means                        | 0 (0 to 0) | 0 (0 to 0) | -6.1% (-16.4% to 3.1%)    |
| 9  | Saint Kitts and Nevis            | Pulmonary aspiration and foreign body in airway | 0 (0 to 0) | 0 (0 to 0) | -12.1% (-20.3% to -3.9%)  |
| 10 | Saint Kitts and Nevis            | Self-harm by firearm                            | 0 (0 to 0) | 0 (0 to 0) | 19.6% (2% to 44.9%)       |
| 11 | Saint Kitts and Nevis            | Self-harm by other specified means              | 0 (0 to 0) | 0 (0 to 0) | -16.5% (-28.4% to -2.5%)  |
| 12 | Saint Kitts and Nevis            | Unintentional firearm injuries                  | 0 (0 to 1) | 0 (0 to 0) | -16.6% (-28.3% to -6.3%)  |
| 13 | Saint Kitts and Nevis            | Venomous animal contact                         | 0 (0 to 0) | 0 (0 to 0) | -4.6% (-11% to 3.1%)      |
| 14 | Saint Lucia                      | Adverse effects of medical treatment            | 0 (0 to 0) | 0 (0 to 0) | 0% (0% to 0%)             |
| 15 | Saint Lucia                      | Conflict and terrorism                          | 0 (0 to 1) | 0 (0 to 0) | NA                        |
| 16 | Saint Lucia                      | Cyclist road injuries                           | 0 (0 to 1) | 0 (0 to 0) | -22.7% (-32% to -12.6%)   |
| 17 | Saint Lucia                      | Drowning                                        | 0 (0 to 0) | 0 (0 to 0) | 32.7% (17.6% to 49.7%)    |
| 18 | Saint Lucia                      | Environmental heat and cold exposure            | 0 (0 to 0) | 0 (0 to 0) | 5.6% (1.9% to 9.6%)       |
| 19 | Saint Lucia                      | Executions and police conflict                  | 0 (0 to 0) | 0 (0 to 0) | NA                        |
| 20 | Saint Lucia                      | Exposure to forces of nature                    | 0 (0 to 0) | 0 (0 to 0) | NA                        |
| 21 | Saint Lucia                      | Falls                                           | 1 (1 to 1) | 1 (1 to 2) | 45.6% (40.2% to 50.8%)    |
| 22 | Saint Lucia                      | Fire, heat, and hot substances                  | 0 (0 to 0) | 0 (0 to 0) | -15.4% (-21.4% to -9%)    |
| 23 | Saint Lucia                      | Foreign body in eyes                            | 0 (0 to 0) | 0 (0 to 0) | 0% (0% to 0%)             |
| 24 | Saint Lucia                      | Foreign body in other body part                 | 0 (0 to 0) | 0 (0 to 0) | 1.5% (-2.3% to 6%)        |
| 25 | Saint Lucia                      | Motor vehicle road injuries                     | 1 (0 to 1) | 1 (0 to 1) | -24% (-32.3% to -15.7%)   |
| 26 | Saint Lucia                      | Motorcyclist road injuries                      | 0 (0 to 0) | 0 (0 to 0) | 34.7% (16.9% to 58%)      |
| 27 | Saint Lucia                      | Non-venomous animal contact                     | 0 (0 to 0) | 0 (0 to 0) | -0.7% (-6.3% to 5.6%)     |
| 28 | Saint Lucia                      | Other exposure to mechanical forces             | 0 (0 to 1) | 0 (0 to 1) | 23.7% (16.3% to 32.5%)    |
| 29 | Saint Lucia                      | Other road injuries                             | 0 (0 to 0) | 0 (0 to 0) | -6.1% (-16.4% to 6%)      |
| 30 | Saint Lucia                      | Other transport injuries                        | 0 (0 to 0) | 0 (0 to 0) | 19.6% (13% to 26.4%)      |
| 31 | Saint Lucia                      | Other unintentional injuries                    | 0 (0 to 0) | 0 (0 to 0) | -6.6% (-11.4% to -1.6%)   |
| 32 | Saint Lucia                      | Pedestrian road injuries                        | 0 (0 to 0) | 0 (0 to 0) | -33.7% (-41.1% to -25.3%) |
| 33 | Saint Lucia                      | Physical violence by firearm                    | 0 (0 to 0) | 0 (0 to 0) | 166.1% (119.3% to 228.7%) |
| 34 | Saint Lucia                      | Physical violence by other means                | 0 (0 to 0) | 0 (0 to 0) | 8% (-3.8% to 20.7%)       |
| 35 | Saint Lucia                      | Physical violence by sharp object               | 0 (0 to 0) | 0 (0 to 0) | 17.3% (0.1% to 34.8%)     |
| 36 | Saint Lucia                      | Poisoning by carbon monoxide                    | 0 (0 to 0) | 0 (0 to 0) | 14.3% (0.6% to 30.4%)     |
| 37 | Saint Lucia                      | Poisoning by other means                        | 0 (0 to 0) | 0 (0 to 0) | -6.4% (-16.5% to 3.6%)    |
| 38 | Saint Lucia                      | Pulmonary aspiration and foreign body in airway | 0 (0 to 0) | 0 (0 to 0) | -20.5% (-26.9% to -13.5%) |
| 39 | Saint Lucia                      | Self-harm by firearm                            | 0 (0 to 0) | 0 (0 to 0) | 8.3% (-3.5% to 24.1%)     |
| 40 | Saint Lucia                      | Self-harm by other specified means              | 0 (0 to 0) | 0 (0 to 0) | -6.9% (-14.6% to 0.5%)    |
| 41 | Saint Lucia                      | Unintentional firearm injuries                  | 0 (0 to 0) | 0 (0 to 0) | 15.9% (6.9% to 24.9%)     |
| 42 | Saint Lucia                      | Venomous animal contact                         | 0 (0 to 0) | 0 (0 to 0) | 0.2% (-5.9% to 6.8%)      |
| 43 | Saint Vincent and the Grenadines | Adverse effects of medical treatment            | 0 (0 to 0) | 0 (0 to 0) | 0% (0% to 0%)             |
| 44 | Saint Vincent and the Grenadines | Conflict and terrorism                          | 0 (0 to 0) | 0 (0 to 0) | NA                        |
| 45 |                                  |                                                 |            |            |                           |
| 46 |                                  |                                                 |            |            |                           |

|    |                                  |                                                 |            |            |                           |
|----|----------------------------------|-------------------------------------------------|------------|------------|---------------------------|
| 1  |                                  |                                                 |            |            |                           |
| 2  | Saint Vincent and the Grenadines | Cyclist road injuries                           | 0 (0 to 0) | 0 (0 to 0) | -17.9% (-25.8% to -9.1%)  |
| 3  | Saint Vincent and the Grenadines | Drowning                                        | 0 (0 to 0) | 0 (0 to 0) | 10.7% (1.1% to 20.9%)     |
| 4  | Saint Vincent and the Grenadines | Environmental heat and cold exposure            | 0 (0 to 1) | 0 (0 to 1) | 5.5% (1.7% to 9.7%)       |
| 5  | Saint Vincent and the Grenadines | Executions and police conflict                  | 0 (0 to 0) | 0 (0 to 0) | NA                        |
| 6  | Saint Vincent and the Grenadines | Exposure to forces of nature                    | 0 (0 to 0) | 0 (0 to 0) | NA                        |
| 7  | Saint Vincent and the Grenadines | Falls                                           | 1 (1 to 2) | 2 (1 to 2) | 46.4% (41% to 51.4%)      |
| 8  | Saint Vincent and the Grenadines | Fire, heat, and hot substances                  | 0 (0 to 0) | 0 (0 to 0) | -19.4% (-24.5% to -13.8%) |
| 9  | Saint Vincent and the Grenadines | Foreign body in eyes                            | 0 (0 to 0) | 0 (0 to 0) | 0% (0% to 0%)             |
| 10 | Saint Vincent and the Grenadines | Foreign body in other body part                 | 0 (0 to 0) | 0 (0 to 0) | -26.1% (-30.3% to -21.8%) |
| 11 | Saint Vincent and the Grenadines | Motor vehicle road injuries                     | 0 (0 to 1) | 0 (0 to 1) | -4.7% (-13% to 5.7%)      |
| 12 | Saint Vincent and the Grenadines | Motorcyclist road injuries                      | 0 (0 to 0) | 0 (0 to 0) | 16.5% (4.6% to 31.7%)     |
| 13 | Saint Vincent and the Grenadines | Non-venomous animal contact                     | 0 (0 to 0) | 0 (0 to 0) | 5% (-2% to 13.4%)         |
| 14 | Saint Vincent and the Grenadines | Other exposure to mechanical forces             | 0 (0 to 1) | 0 (0 to 1) | 28.8% (18.8% to 40.2%)    |
| 15 | Saint Vincent and the Grenadines | Other road injuries                             | 0 (0 to 0) | 0 (0 to 0) | -7.2% (-17.5% to 3.3%)    |
| 16 | Saint Vincent and the Grenadines | Other transport injuries                        | 0 (0 to 0) | 0 (0 to 0) | 7% (2.1% to 12.5%)        |
| 17 | Saint Vincent and the Grenadines | Other unintentional injuries                    | 0 (0 to 0) | 0 (0 to 0) | -3.3% (-7.8% to 1.2%)     |
| 18 | Saint Vincent and the Grenadines | Pedestrian road injuries                        | 0 (0 to 0) | 0 (0 to 0) | -49.2% (-55.8% to -42.6%) |
| 19 | Saint Vincent and the Grenadines | Physical violence by firearm                    | 0 (0 to 0) | 0 (0 to 0) | 86.5% (60.5% to 123.9%)   |
| 20 | Saint Vincent and the Grenadines | Physical violence by other means                | 0 (0 to 0) | 0 (0 to 0) | -1.3% (-12.2% to 10.2%)   |
| 21 | Saint Vincent and the Grenadines | Physical violence by sharp object               | 0 (0 to 0) | 0 (0 to 0) | 61.6% (42.2% to 87.7%)    |
| 22 | Saint Vincent and the Grenadines | Poisoning by carbon monoxide                    | 0 (0 to 0) | 0 (0 to 0) | 14.4% (0.2% to 30.4%)     |
| 23 | Saint Vincent and the Grenadines | Poisoning by other means                        | 0 (0 to 0) | 0 (0 to 0) | 4.2% (-5.9% to 13.8%)     |
| 24 | Saint Vincent and the Grenadines | Pulmonary aspiration and foreign body in airway | 0 (0 to 0) | 0 (0 to 0) | -16.3% (-22.9% to -8.7%)  |
| 25 | Saint Vincent and the Grenadines | Self-harm by firearm                            | 0 (0 to 0) | 0 (0 to 0) | 12.5% (0.5% to 28.9%)     |
| 26 | Saint Vincent and the Grenadines | Self-harm by other specified means              | 0 (0 to 0) | 0 (0 to 0) | -13.1% (-20.3% to -6.1%)  |
| 27 | Saint Vincent and the Grenadines | Unintentional firearm injuries                  | 0 (0 to 0) | 0 (0 to 0) | 4.4% (-6.3% to 13.8%)     |
| 28 | Saint Vincent and the Grenadines | Venomous animal contact                         | 0 (0 to 0) | 0 (0 to 0) | -3.2% (-9.8% to 3.7%)     |
| 29 | Samoa                            | Adverse effects of medical treatment            | 0 (0 to 0) | 0 (0 to 0) | 0% (0% to 0%)             |
| 30 | Samoa                            | Conflict and terrorism                          | 0 (0 to 0) | 0 (0 to 0) | NA                        |
| 31 | Samoa                            | Cyclist road injuries                           | 0 (0 to 0) | 0 (0 to 0) | 4% (-3.4% to 12.4%)       |
| 32 | Samoa                            | Drowning                                        | 0 (0 to 0) | 0 (0 to 0) | 17.2% (8.1% to 27.1%)     |
| 33 | Samoa                            | Environmental heat and cold exposure            | 0 (0 to 0) | 0 (0 to 0) | 0.1% (-4.9% to 4.8%)      |
| 34 | Samoa                            | Executions and police conflict                  | 0 (0 to 0) | 0 (0 to 0) | NA                        |
| 35 | Samoa                            | Exposure to forces of nature                    | 2 (1 to 3) | 0 (0 to 0) | NA                        |
| 36 | Samoa                            | Falls                                           | 1 (1 to 2) | 2 (1 to 2) | 45.7% (40.5% to 51.5%)    |
| 37 | Samoa                            | Fire, heat, and hot substances                  | 0 (0 to 0) | 0 (0 to 0) | 5.7% (-0.4% to 12.4%)     |
| 38 | Samoa                            | Foreign body in eyes                            | 0 (0 to 0) | 0 (0 to 0) | 0% (0% to 0%)             |
| 39 | Samoa                            | Foreign body in other body part                 | 0 (0 to 0) | 0 (0 to 0) | -2.2% (-6.8% to 1.5%)     |
| 40 | Samoa                            | Motor vehicle road injuries                     | 1 (0 to 1) | 1 (0 to 1) | -2.7% (-9.7% to 4.5%)     |
| 41 | Samoa                            | Motorcyclist road injuries                      | 0 (0 to 0) | 0 (0 to 0) | 19.2% (8.9% to 31.7%)     |
| 42 | Samoa                            | Non-venomous animal contact                     | 0 (0 to 0) | 0 (0 to 0) | -14.5% (-18.2% to -10.8%) |
| 43 | Samoa                            | Other exposure to mechanical forces             | 0 (0 to 0) | 0 (0 to 0) | -10.9% (-17.2% to -4.7%)  |
| 44 | Samoa                            | Other road injuries                             | 0 (0 to 0) | 0 (0 to 0) | 1.7% (-7.6% to 13%)       |
| 45 |                                  |                                                 |            |            |                           |
| 46 |                                  |                                                 |            |            |                           |

|    |                       |                                                 |              |               |                           |
|----|-----------------------|-------------------------------------------------|--------------|---------------|---------------------------|
| 1  |                       |                                                 |              |               |                           |
| 2  | Samoa                 | Other transport injuries                        | 0 (0 to 0)   | 0 (0 to 0)    | -3.3% (-7.5% to 0.8%)     |
| 3  | Samoa                 | Other unintentional injuries                    | 0 (0 to 0)   | 0 (0 to 0)    | -2% (-6.4% to 2.6%)       |
| 4  | Samoa                 | Pedestrian road injuries                        | 0 (0 to 0)   | 0 (0 to 0)    | 13.4% (3.8% to 23.5%)     |
| 5  | Samoa                 | Physical violence by firearm                    | 0 (0 to 0)   | 0 (0 to 0)    | 1.6% (-9.8% to 13.9%)     |
| 6  | Samoa                 | Physical violence by other means                | 0 (0 to 1)   | 1 (0 to 1)    | 4.8% (-1.9% to 12.2%)     |
| 7  | Samoa                 | Physical violence by sharp object               | 0 (0 to 0)   | 0 (0 to 0)    | -20.1% (-28.5% to -12.8%) |
| 8  | Samoa                 | Poisoning by carbon monoxide                    | 0 (0 to 0)   | 0 (0 to 0)    | 14.8% (4.6% to 25.5%)     |
| 9  | Samoa                 | Poisoning by other means                        | 0 (0 to 0)   | 0 (0 to 0)    | -12% (-18.3% to -5.6%)    |
| 10 | Samoa                 | Pulmonary aspiration and foreign body in airway | 0 (0 to 0)   | 0 (0 to 0)    | -5.1% (-13.8% to 5.2%)    |
| 11 | Samoa                 | Self-harm by firearm                            | 0 (0 to 0)   | 0 (0 to 0)    | -7.7% (-22.2% to 8.6%)    |
| 12 | Samoa                 | Self-harm by other specified means              | 0 (0 to 0)   | 0 (0 to 0)    | -3.1% (-8.4% to 2.6%)     |
| 13 | Samoa                 | Unintentional firearm injuries                  | 0 (0 to 0)   | 0 (0 to 0)    | -16.7% (-23.8% to -10.6%) |
| 14 | Samoa                 | Venomous animal contact                         | 0 (0 to 0)   | 0 (0 to 0)    | -11.7% (-17.1% to -5.7%)  |
| 15 | San Marino            | Adverse effects of medical treatment            | 0 (0 to 0)   | 0 (0 to 0)    | 0% (0% to 0%)             |
| 16 | San Marino            | Conflict and terrorism                          | 0 (0 to 0)   | 0 (0 to 0)    | NA                        |
| 17 | San Marino            | Cyclist road injuries                           | 1 (0 to 1)   | 1 (0 to 1)    | -26.9% (-33.1% to -19.7%) |
| 18 | San Marino            | Drowning                                        | 0 (0 to 0)   | 0 (0 to 0)    | 67.1% (55.5% to 82.1%)    |
| 19 | San Marino            | Environmental heat and cold exposure            | 0 (0 to 0)   | 0 (0 to 0)    | -3.8% (-8.2% to 0.8%)     |
| 20 | San Marino            | Executions and police conflict                  | 0 (0 to 0)   | 0 (0 to 0)    | NA                        |
| 21 | San Marino            | Exposure to forces of nature                    | 0 (0 to 0)   | 0 (0 to 0)    | NA                        |
| 22 | San Marino            | Falls                                           | 12 (8 to 17) | 15 (10 to 21) | 21% (16.8% to 24.8%)      |
| 23 | San Marino            | Fire, heat, and hot substances                  | 0 (0 to 0)   | 0 (0 to 0)    | 2.9% (-0.8% to 7.1%)      |
| 24 | San Marino            | Foreign body in eyes                            | 0 (0 to 0)   | 0 (0 to 0)    | 0% (0% to 0%)             |
| 25 | San Marino            | Foreign body in other body part                 | 0 (0 to 1)   | 0 (0 to 1)    | 0.5% (-3.3% to 5.3%)      |
| 26 | San Marino            | Motor vehicle road injuries                     | 1 (0 to 2)   | 1 (0 to 1)    | -25.3% (-31.8% to -18%)   |
| 27 | San Marino            | Motorcyclist road injuries                      | 1 (0 to 2)   | 1 (0 to 1)    | -19.8% (-28% to -11.2%)   |
| 28 | San Marino            | Non-venomous animal contact                     | 0 (0 to 0)   | 0 (0 to 0)    | -4.2% (-8% to -0.5%)      |
| 29 | San Marino            | Other exposure to mechanical forces             | 1 (0 to 2)   | 1 (0 to 1)    | -7.8% (-12.7% to -3.2%)   |
| 30 | San Marino            | Other road injuries                             | 0 (0 to 0)   | 0 (0 to 0)    | -4.8% (-14.3% to 7.5%)    |
| 31 | San Marino            | Other transport injuries                        | 0 (0 to 0)   | 0 (0 to 0)    | 7.6% (3.2% to 11.8%)      |
| 32 | San Marino            | Other unintentional injuries                    | 1 (1 to 1)   | 1 (0 to 1)    | -8.3% (-12.1% to -4.9%)   |
| 33 | San Marino            | Pedestrian road injuries                        | 0 (0 to 1)   | 0 (0 to 0)    | -25.8% (-33% to -18.4%)   |
| 34 | San Marino            | Physical violence by firearm                    | 0 (0 to 0)   | 0 (0 to 0)    | 24% (14.9% to 35.8%)      |
| 35 | San Marino            | Physical violence by other means                | 0 (0 to 0)   | 0 (0 to 0)    | 0.8% (-4.3% to 6%)        |
| 36 | San Marino            | Physical violence by sharp object               | 0 (0 to 0)   | 0 (0 to 0)    | -2.5% (-10.5% to 5.9%)    |
| 37 | San Marino            | Poisoning by carbon monoxide                    | 0 (0 to 0)   | 0 (0 to 0)    | 28.1% (19% to 37.7%)      |
| 38 | San Marino            | Poisoning by other means                        | 0 (0 to 0)   | 0 (0 to 0)    | -13% (-17.3% to -7.3%)    |
| 39 | San Marino            | Pulmonary aspiration and foreign body in airway | 0 (0 to 0)   | 0 (0 to 0)    | -3.4% (-9.7% to 3.8%)     |
| 40 | San Marino            | Self-harm by firearm                            | 0 (0 to 0)   | 0 (0 to 0)    | -7.5% (-17% to 2.9%)      |
| 41 | San Marino            | Self-harm by other specified means              | 0 (0 to 0)   | 0 (0 to 0)    | -0.9% (-5.8% to 3.4%)     |
| 42 | San Marino            | Unintentional firearm injuries                  | 0 (0 to 0)   | 0 (0 to 0)    | 6.9% (-0.8% to 15%)       |
| 43 | San Marino            | Venomous animal contact                         | 0 (0 to 0)   | 0 (0 to 0)    | -6.2% (-12.8% to 0.5%)    |
| 44 | Sao Tome and Principe | Adverse effects of medical treatment            | 0 (0 to 0)   | 0 (0 to 0)    | 0% (0% to 0%)             |
| 45 |                       |                                                 |              |               |                           |
| 46 |                       |                                                 |              |               |                           |

|    |                       |                                                 |            |             |                          |
|----|-----------------------|-------------------------------------------------|------------|-------------|--------------------------|
| 1  |                       |                                                 |            |             |                          |
| 2  | Sao Tome and Principe | Conflict and terrorism                          | 0 (0 to 0) | 0 (0 to 0)  | NA                       |
| 3  | Sao Tome and Principe | Cyclist road injuries                           | 1 (0 to 2) | 1 (1 to 2)  | 25.5% (16.7% to 35.7%)   |
| 4  | Sao Tome and Principe | Drowning                                        | 0 (0 to 0) | 0 (0 to 0)  | 23.7% (12.8% to 36.8%)   |
| 5  | Sao Tome and Principe | Environmental heat and cold exposure            | 0 (0 to 0) | 0 (0 to 0)  | 3.9% (-1.3% to 9.4%)     |
| 6  | Sao Tome and Principe | Executions and police conflict                  | 0 (0 to 0) | 0 (0 to 0)  | NA                       |
| 7  | Sao Tome and Principe | Exposure to forces of nature                    | 0 (0 to 0) | 0 (0 to 0)  | NA                       |
| 8  | Sao Tome and Principe | Falls                                           | 4 (3 to 6) | 6 (4 to 8)  | 37.6% (33% to 42.6%)     |
| 9  | Sao Tome and Principe | Fire, heat, and hot substances                  | 0 (0 to 0) | 0 (0 to 0)  | 5.7% (0.7% to 11.3%)     |
| 10 | Sao Tome and Principe | Foreign body in eyes                            | 0 (0 to 0) | 0 (0 to 0)  | 0% (0% to 0%)            |
| 11 | Sao Tome and Principe | Foreign body in other body part                 | 1 (0 to 1) | 1 (0 to 1)  | 0% (-4% to 4.1%)         |
| 12 | Sao Tome and Principe | Motor vehicle road injuries                     | 1 (1 to 2) | 2 (1 to 3)  | 30.8% (22.1% to 40.9%)   |
| 13 | Sao Tome and Principe | Motorcyclist road injuries                      | 0 (0 to 1) | 1 (0 to 1)  | 23.9% (14% to 35.4%)     |
| 14 | Sao Tome and Principe | Non-venomous animal contact                     | 0 (0 to 0) | 0 (0 to 0)  | 1.8% (-1.7% to 5.9%)     |
| 15 | Sao Tome and Principe | Other exposure to mechanical forces             | 0 (0 to 0) | 0 (0 to 0)  | -7.9% (-13.6% to -2.8%)  |
| 16 | Sao Tome and Principe | Other road injuries                             | 0 (0 to 0) | 0 (0 to 0)  | 13.7% (5% to 23.6%)      |
| 17 | Sao Tome and Principe | Other transport injuries                        | 0 (0 to 1) | 0 (0 to 1)  | 2.4% (-2.3% to 7%)       |
| 18 | Sao Tome and Principe | Other unintentional injuries                    | 0 (0 to 0) | 0 (0 to 0)  | -7.5% (-13.6% to -2%)    |
| 19 | Sao Tome and Principe | Pedestrian road injuries                        | 1 (1 to 3) | 2 (1 to 3)  | 16% (8.6% to 24.2%)      |
| 20 | Sao Tome and Principe | Physical violence by firearm                    | 0 (0 to 0) | 0 (0 to 0)  | 63.4% (44.9% to 88%)     |
| 21 | Sao Tome and Principe | Physical violence by other means                | 0 (0 to 0) | 0 (0 to 0)  | 9.7% (3% to 16.8%)       |
| 22 | Sao Tome and Principe | Physical violence by sharp object               | 0 (0 to 0) | 0 (0 to 0)  | 10.2% (1.9% to 19.2%)    |
| 23 | Sao Tome and Principe | Poisoning by carbon monoxide                    | 0 (0 to 0) | 0 (0 to 0)  | 25.8% (11.6% to 41.1%)   |
| 24 | Sao Tome and Principe | Poisoning by other means                        | 0 (0 to 0) | 0 (0 to 0)  | -8.3% (-16.1% to 0.1%)   |
| 25 | Sao Tome and Principe | Pulmonary aspiration and foreign body in airway | 0 (0 to 0) | 0 (0 to 0)  | -3.1% (-13.7% to 7.4%)   |
| 26 | Sao Tome and Principe | Self-harm by firearm                            | 0 (0 to 0) | 0 (0 to 0)  | 40.4% (29.9% to 54.6%)   |
| 27 | Sao Tome and Principe | Self-harm by other specified means              | 0 (0 to 0) | 0 (0 to 0)  | 36.4% (29.9% to 45.5%)   |
| 28 | Sao Tome and Principe | Unintentional firearm injuries                  | 0 (0 to 0) | 0 (0 to 0)  | -9.8% (-17.7% to -2.6%)  |
| 29 | Sao Tome and Principe | Venomous animal contact                         | 0 (0 to 0) | 0 (0 to 0)  | 3% (-3.2% to 10.3%)      |
| 30 | Saudi Arabia          | Adverse effects of medical treatment            | 0 (0 to 0) | 0 (0 to 0)  | 0% (0% to 0%)            |
| 31 | Saudi Arabia          | Conflict and terrorism                          | 0 (0 to 0) | 0 (0 to 0)  | NA                       |
| 32 | Saudi Arabia          | Cyclist road injuries                           | 0 (0 to 0) | 0 (0 to 0)  | -9.3% (-17.9% to 0.6%)   |
| 33 | Saudi Arabia          | Drowning                                        | 0 (0 to 0) | 0 (0 to 0)  | 123.2% (97.1% to 150.2%) |
| 34 | Saudi Arabia          | Environmental heat and cold exposure            | 0 (0 to 0) | 0 (0 to 0)  | 2.9% (-1.3% to 6.9%)     |
| 35 | Saudi Arabia          | Executions and police conflict                  | 0 (0 to 0) | 0 (0 to 0)  | NA                       |
| 36 | Saudi Arabia          | Exposure to forces of nature                    | 0 (0 to 0) | 0 (0 to 0)  | NA                       |
| 37 | Saudi Arabia          | Falls                                           | 5 (4 to 7) | 8 (6 to 10) | 58.3% (52.5% to 64.8%)   |
| 38 | Saudi Arabia          | Fire, heat, and hot substances                  | 0 (0 to 0) | 0 (0 to 0)  | 0.6% (-5.5% to 6.9%)     |
| 39 | Saudi Arabia          | Foreign body in eyes                            | 0 (0 to 0) | 0 (0 to 0)  | 0% (0% to 0%)            |
| 40 | Saudi Arabia          | Foreign body in other body part                 | 0 (0 to 0) | 0 (0 to 0)  | -1% (-4.7% to 2.6%)      |
| 41 | Saudi Arabia          | Motor vehicle road injuries                     | 1 (1 to 2) | 1 (1 to 2)  | 14.5% (5.5% to 23.6%)    |
| 42 | Saudi Arabia          | Motorcyclist road injuries                      | 0 (0 to 0) | 0 (0 to 0)  | 19.6% (5% to 37.4%)      |
| 43 | Saudi Arabia          | Non-venomous animal contact                     | 0 (0 to 0) | 0 (0 to 0)  | -0.2% (-4.6% to 4.5%)    |
| 44 | Saudi Arabia          | Other exposure to mechanical forces             | 0 (0 to 1) | 0 (0 to 1)  | -6.4% (-12.7% to 0.9%)   |
| 45 |                       |                                                 |            |             |                          |
| 46 |                       |                                                 |            |             |                          |

|    |              |                                                 |            |            |                           |
|----|--------------|-------------------------------------------------|------------|------------|---------------------------|
| 1  |              |                                                 |            |            |                           |
| 2  | Saudi Arabia | Other road injuries                             | 0 (0 to 0) | 0 (0 to 0) | -1.8% (-12.7% to 9.8%)    |
| 3  | Saudi Arabia | Other transport injuries                        | 0 (0 to 0) | 0 (0 to 0) | 13.2% (7.3% to 19.5%)     |
| 4  | Saudi Arabia | Other unintentional injuries                    | 1 (0 to 1) | 0 (0 to 1) | -32.8% (-36.8% to -28.5%) |
| 5  | Saudi Arabia | Pedestrian road injuries                        | 0 (0 to 1) | 0 (0 to 1) | -14.6% (-23.7% to -4.6%)  |
| 6  | Saudi Arabia | Physical violence by firearm                    | 0 (0 to 0) | 0 (0 to 0) | 79.1% (52.8% to 117.1%)   |
| 7  | Saudi Arabia | Physical violence by other means                | 0 (0 to 0) | 0 (0 to 0) | 12.8% (3% to 25%)         |
| 8  | Saudi Arabia | Physical violence by sharp object               | 0 (0 to 0) | 0 (0 to 0) | -27.7% (-36.8% to -19.2%) |
| 9  | Saudi Arabia | Poisoning by carbon monoxide                    | 0 (0 to 0) | 0 (0 to 0) | 50.5% (33.4% to 70.2%)    |
| 10 | Saudi Arabia | Poisoning by other means                        | 0 (0 to 0) | 0 (0 to 0) | -17.6% (-25.4% to -10%)   |
| 11 | Saudi Arabia | Pulmonary aspiration and foreign body in airway | 0 (0 to 0) | 0 (0 to 0) | 4.4% (-3.5% to 14.6%)     |
| 12 | Saudi Arabia | Self-harm by firearm                            | 0 (0 to 0) | 0 (0 to 0) | 69.9% (50.3% to 92.4%)    |
| 13 | Saudi Arabia | Self-harm by other specified means              | 0 (0 to 0) | 0 (0 to 0) | 90% (75.9% to 105.3%)     |
| 14 | Saudi Arabia | Unintentional firearm injuries                  | 0 (0 to 0) | 0 (0 to 0) | -30% (-37.8% to -23.1%)   |
| 15 | Senegal      | Venomous animal contact                         | 0 (0 to 0) | 0 (0 to 0) | 3.1% (-4.3% to 11%)       |
| 16 | Senegal      | Adverse effects of medical treatment            | 0 (0 to 0) | 0 (0 to 0) | 0% (0% to 0%)             |
| 17 | Senegal      | Conflict and terrorism                          | 0 (0 to 1) | 0 (0 to 0) | NA                        |
| 18 | Senegal      | Cyclist road injuries                           | 1 (0 to 2) | 1 (1 to 2) | 15% (7.4% to 23.6%)       |
| 19 | Senegal      | Drowning                                        | 0 (0 to 0) | 0 (0 to 0) | -5.4% (-12.8% to 2.4%)    |
| 20 | Senegal      | Environmental heat and cold exposure            | 0 (0 to 0) | 0 (0 to 0) | -1.9% (-6.9% to 3.6%)     |
| 21 | Senegal      | Executions and police conflict                  | 0 (0 to 0) | 0 (0 to 0) | NA                        |
| 22 | Senegal      | Exposure to forces of nature                    | 0 (0 to 0) | 0 (0 to 0) | NA                        |
| 23 | Senegal      | Falls                                           | 3 (2 to 4) | 3 (2 to 5) | 20.3% (16.2% to 24.8%)    |
| 24 | Senegal      | Fire, heat, and hot substances                  | 0 (0 to 0) | 0 (0 to 0) | -7.8% (-13.4% to -2.8%)   |
| 25 | Senegal      | Foreign body in eyes                            | 0 (0 to 0) | 0 (0 to 0) | 0% (0% to 0%)             |
| 26 | Senegal      | Foreign body in other body part                 | 1 (0 to 1) | 1 (0 to 1) | -0.2% (-3.3% to 3.4%)     |
| 27 | Senegal      | Motor vehicle road injuries                     | 2 (1 to 3) | 2 (1 to 4) | 18.5% (10.1% to 27.8%)    |
| 28 | Senegal      | Motorcyclist road injuries                      | 0 (0 to 1) | 0 (0 to 1) | 8.9% (0.7% to 18%)        |
| 29 | Senegal      | Non-venomous animal contact                     | 0 (0 to 0) | 0 (0 to 0) | -10.5% (-14.3% to -6.2%)  |
| 30 | Senegal      | Other exposure to mechanical forces             | 0 (0 to 0) | 0 (0 to 0) | -6.4% (-11.6% to -1.6%)   |
| 31 | Senegal      | Other road injuries                             | 0 (0 to 0) | 0 (0 to 0) | 12.3% (3% to 21.9%)       |
| 32 | Senegal      | Other transport injuries                        | 0 (0 to 0) | 0 (0 to 0) | -9.2% (-14% to -5%)       |
| 33 | Senegal      | Other unintentional injuries                    | 0 (0 to 0) | 0 (0 to 0) | -11.7% (-16.2% to -6.6%)  |
| 34 | Senegal      | Pedestrian road injuries                        | 2 (1 to 4) | 2 (1 to 3) | -10% (-15.7% to -4.2%)    |
| 35 | Senegal      | Physical violence by firearm                    | 0 (0 to 0) | 0 (0 to 0) | 51.3% (29.8% to 78.9%)    |
| 36 | Senegal      | Physical violence by other means                | 0 (0 to 0) | 0 (0 to 0) | 4.1% (-1.6% to 10.1%)     |
| 37 | Senegal      | Physical violence by sharp object               | 0 (0 to 0) | 0 (0 to 0) | 4.5% (-2.6% to 11.6%)     |
| 38 | Senegal      | Poisoning by carbon monoxide                    | 0 (0 to 0) | 0 (0 to 0) | 15.5% (1.4% to 30.4%)     |
| 39 | Senegal      | Poisoning by other means                        | 0 (0 to 0) | 0 (0 to 0) | -15.5% (-21.8% to -9%)    |
| 40 | Senegal      | Pulmonary aspiration and foreign body in airway | 0 (0 to 0) | 0 (0 to 0) | -5.2% (-12.6% to 2.8%)    |
| 41 | Senegal      | Self-harm by firearm                            | 0 (0 to 0) | 0 (0 to 0) | 15.5% (3.1% to 28.4%)     |
| 42 | Senegal      | Self-harm by other specified means              | 0 (0 to 0) | 0 (0 to 0) | 9.1% (4.6% to 14.2%)      |
| 43 | Senegal      | Unintentional firearm injuries                  | 0 (0 to 0) | 0 (0 to 0) | -13.2% (-20.8% to -6.5%)  |
| 44 | Senegal      | Venomous animal contact                         | 0 (0 to 0) | 0 (0 to 0) | -7.4% (-13.5% to -0.4%)   |
| 45 |              |                                                 |            |            |                           |
| 46 |              |                                                 |            |            |                           |



|    |            |                                                 |            |            |                           |
|----|------------|-------------------------------------------------|------------|------------|---------------------------|
| 1  |            |                                                 |            |            |                           |
| 2  | Serbia     | Adverse effects of medical treatment            | 0 (0 to 0) | 0 (0 to 0) | 0% (0% to 0%)             |
| 3  | Serbia     | Conflict and terrorism                          | 0 (0 to 0) | 0 (0 to 0) | NA                        |
| 4  | Serbia     | Cyclist road injuries                           | 1 (0 to 1) | 1 (0 to 1) | -21.7% (-30.1% to -12.3%) |
| 5  | Serbia     | Drowning                                        | 0 (0 to 0) | 0 (0 to 0) | 110.2% (79.1% to 148.5%)  |
| 6  | Serbia     | Environmental heat and cold exposure            | 0 (0 to 0) | 0 (0 to 0) | -8.2% (-12.7% to -3.7%)   |
| 7  | Serbia     | Executions and police conflict                  | 0 (0 to 0) | 0 (0 to 0) | NA                        |
| 8  | Serbia     | Exposure to forces of nature                    | 0 (0 to 0) | 0 (0 to 0) | NA                        |
| 9  | Serbia     | Falls                                           | 4 (3 to 5) | 5 (4 to 7) | 36.8% (30.8% to 42.2%)    |
| 10 | Serbia     | Fire, heat, and hot substances                  | 0 (0 to 0) | 0 (0 to 0) | 1.2% (-4.2% to 6.3%)      |
| 11 | Serbia     | Foreign body in eyes                            | 0 (0 to 0) | 0 (0 to 0) | 0% (0% to 0%)             |
| 12 | Serbia     | Foreign body in other body part                 | 0 (0 to 0) | 0 (0 to 0) | 0.8% (-3.3% to 4.8%)      |
| 13 | Serbia     | Motor vehicle road injuries                     | 2 (1 to 3) | 1 (1 to 2) | -25.8% (-32% to -17.6%)   |
| 14 | Serbia     | Motorcyclist road injuries                      | 0 (0 to 0) | 0 (0 to 0) | -28.9% (-38.8% to -18%)   |
| 15 | Serbia     | Non-venomous animal contact                     | 0 (0 to 0) | 0 (0 to 0) | -6% (-10% to -1.1%)       |
| 16 | Serbia     | Other exposure to mechanical forces             | 1 (1 to 3) | 2 (1 to 3) | 2.1% (-3.2% to 7.4%)      |
| 17 | Serbia     | Other road injuries                             | 0 (0 to 0) | 0 (0 to 0) | -11.2% (-21% to 0.1%)     |
| 18 | Serbia     | Other transport injuries                        | 0 (0 to 0) | 0 (0 to 0) | -11.1% (-17.3% to -4.9%)  |
| 19 | Serbia     | Other unintentional injuries                    | 0 (0 to 1) | 0 (0 to 0) | -24.2% (-31.1% to -16.9%) |
| 20 | Serbia     | Pedestrian road injuries                        | 0 (0 to 1) | 0 (0 to 1) | -38.4% (-46.1% to -30.3%) |
| 21 | Serbia     | Physical violence by firearm                    | 0 (0 to 0) | 0 (0 to 0) | -8.1% (-21.6% to 7.7%)    |
| 22 | Serbia     | Physical violence by other means                | 1 (0 to 1) | 0 (0 to 1) | -37.4% (-43.1% to -31.7%) |
| 23 | Serbia     | Physical violence by sharp object               | 0 (0 to 0) | 0 (0 to 0) | -34.5% (-43.1% to -25.5%) |
| 24 | Serbia     | Poisoning by carbon monoxide                    | 0 (0 to 0) | 0 (0 to 0) | 43.4% (31.8% to 56.7%)    |
| 25 | Serbia     | Poisoning by other means                        | 0 (0 to 0) | 0 (0 to 0) | 7.8% (-3.4% to 16.3%)     |
| 26 | Serbia     | Pulmonary aspiration and foreign body in airway | 0 (0 to 0) | 0 (0 to 0) | -14.3% (-22.5% to -7.2%)  |
| 27 | Serbia     | Self-harm by firearm                            | 0 (0 to 0) | 0 (0 to 0) | -12.5% (-23.8% to 3.8%)   |
| 28 | Serbia     | Self-harm by other specified means              | 0 (0 to 1) | 0 (0 to 0) | -32.7% (-36.4% to -28.7%) |
| 29 | Serbia     | Unintentional firearm injuries                  | 0 (0 to 0) | 0 (0 to 0) | -12.6% (-21.1% to -5.3%)  |
| 30 | Serbia     | Venomous animal contact                         | 0 (0 to 0) | 0 (0 to 0) | -10.7% (-16.2% to -5.4%)  |
| 31 | Seychelles | Adverse effects of medical treatment            | 0 (0 to 0) | 0 (0 to 0) | 0% (0% to 0%)             |
| 32 | Seychelles | Conflict and terrorism                          | 0 (0 to 0) | 0 (0 to 0) | NA                        |
| 33 | Seychelles | Cyclist road injuries                           | 0 (0 to 1) | 1 (0 to 1) | 30.1% (18.8% to 43%)      |
| 34 | Seychelles | Drowning                                        | 0 (0 to 0) | 0 (0 to 0) | 29.7% (16.8% to 41.8%)    |
| 35 | Seychelles | Environmental heat and cold exposure            | 0 (0 to 0) | 0 (0 to 0) | 2.1% (-2.7% to 6.7%)      |
| 36 | Seychelles | Executions and police conflict                  | 0 (0 to 0) | 0 (0 to 0) | NA                        |
| 37 | Seychelles | Exposure to forces of nature                    | 0 (0 to 0) | 0 (0 to 0) | NA                        |
| 38 | Seychelles | Falls                                           | 4 (3 to 5) | 4 (3 to 6) | 17.5% (12.9% to 21.6%)    |
| 39 | Seychelles | Fire, heat, and hot substances                  | 0 (0 to 0) | 0 (0 to 0) | -30.4% (-35.3% to -26%)   |
| 40 | Seychelles | Foreign body in eyes                            | 0 (0 to 0) | 0 (0 to 0) | 0% (0% to 0%)             |
| 41 | Seychelles | Foreign body in other body part                 | 0 (0 to 0) | 0 (0 to 0) | -0.1% (-3.6% to 3.7%)     |
| 42 | Seychelles | Motor vehicle road injuries                     | 1 (0 to 2) | 1 (1 to 2) | 26.8% (16.1% to 38.5%)    |
| 43 | Seychelles | Motorcyclist road injuries                      | 1 (0 to 2) | 1 (1 to 2) | 6.7% (-3.4% to 17.9%)     |
| 44 | Seychelles | Non-venomous animal contact                     | 0 (0 to 0) | 0 (0 to 0) | -18.2% (-21.7% to -13.5%) |
| 45 |            |                                                 |            |            |                           |
| 46 |            |                                                 |            |            |                           |

|    |              |                                                 |            |            |                           |
|----|--------------|-------------------------------------------------|------------|------------|---------------------------|
| 1  |              |                                                 |            |            |                           |
| 2  | Seychelles   | Other exposure to mechanical forces             | 0 (0 to 1) | 0 (0 to 0) | -26.8% (-33.7% to -21.1%) |
| 3  | Seychelles   | Other road injuries                             | 0 (0 to 0) | 0 (0 to 0) | 26.6% (14.8% to 40.3%)    |
| 4  | Seychelles   | Other transport injuries                        | 0 (0 to 0) | 0 (0 to 0) | 3.4% (-1.9% to 8.8%)      |
| 5  | Seychelles   | Other unintentional injuries                    | 0 (0 to 0) | 0 (0 to 0) | -12.8% (-18.3% to -6.9%)  |
| 6  | Seychelles   | Pedestrian road injuries                        | 1 (0 to 1) | 1 (0 to 1) | 12.4% (3.5% to 21.8%)     |
| 7  | Seychelles   | Physical violence by firearm                    | 0 (0 to 0) | 0 (0 to 0) | 42% (28.2% to 59.1%)      |
| 8  | Seychelles   | Physical violence by other means                | 1 (0 to 1) | 0 (0 to 1) | -16.1% (-21.1% to -10.9%) |
| 9  | Seychelles   | Physical violence by sharp object               | 0 (0 to 0) | 0 (0 to 0) | -21.5% (-29% to -14.3%)   |
| 10 | Seychelles   | Poisoning by carbon monoxide                    | 0 (0 to 0) | 0 (0 to 0) | 13% (2.4% to 25.5%)       |
| 11 | Seychelles   | Poisoning by other means                        | 0 (0 to 0) | 0 (0 to 0) | -15.7% (-21.5% to -10.1%) |
| 12 | Seychelles   | Pulmonary aspiration and foreign body in airway | 0 (0 to 0) | 0 (0 to 0) | -17.9% (-24.8% to -10.4%) |
| 13 | Seychelles   | Self-harm by firearm                            | 0 (0 to 0) | 0 (0 to 0) | 29.4% (7.5% to 58.8%)     |
| 14 | Seychelles   | Self-harm by other specified means              | 0 (0 to 0) | 0 (0 to 0) | 2.5% (-2.8% to 9.4%)      |
| 15 | Seychelles   | Unintentional firearm injuries                  | 0 (0 to 0) | 0 (0 to 0) | -12.6% (-21.4% to -3.4%)  |
| 16 | Sierra Leone | Venomous animal contact                         | 0 (0 to 0) | 0 (0 to 0) | -24.7% (-32.6% to -16.6%) |
| 17 | Sierra Leone | Adverse effects of medical treatment            | 0 (0 to 0) | 0 (0 to 0) | 0% (0% to 0%)             |
| 18 | Sierra Leone | Conflict and terrorism                          | 0 (0 to 0) | 0 (0 to 0) | NA                        |
| 19 | Sierra Leone | Cyclist road injuries                           | 1 (1 to 2) | 1 (1 to 2) | 11.7% (4.6% to 19.3%)     |
| 20 | Sierra Leone | Drowning                                        | 0 (0 to 0) | 0 (0 to 0) | -14.7% (-21.2% to -8.9%)  |
| 21 | Sierra Leone | Environmental heat and cold exposure            | 0 (0 to 0) | 0 (0 to 0) | 2.1% (-3.2% to 7.7%)      |
| 22 | Sierra Leone | Executions and police conflict                  | 0 (0 to 0) | 0 (0 to 0) | NA                        |
| 23 | Sierra Leone | Exposure to forces of nature                    | 0 (0 to 0) | 0 (0 to 0) | NA                        |
| 24 | Sierra Leone | Falls                                           | 2 (2 to 4) | 3 (2 to 4) | 16.5% (12% to 20.8%)      |
| 25 | Sierra Leone | Fire, heat, and hot substances                  | 0 (0 to 0) | 0 (0 to 0) | -5.6% (-11.2% to 0.6%)    |
| 26 | Sierra Leone | Foreign body in eyes                            | 0 (0 to 0) | 0 (0 to 0) | 0% (0% to 0%)             |
| 27 | Sierra Leone | Foreign body in other body part                 | 1 (0 to 1) | 1 (0 to 1) | 0.3% (-2.9% to 4.3%)      |
| 28 | Sierra Leone | Motor vehicle road injuries                     | 2 (1 to 3) | 2 (1 to 3) | 18.5% (10.2% to 27.6%)    |
| 29 | Sierra Leone | Motorcyclist road injuries                      | 1 (1 to 2) | 1 (1 to 2) | 3.8% (-3.6% to 10.9%)     |
| 30 | Sierra Leone | Non-venomous animal contact                     | 0 (0 to 0) | 0 (0 to 0) | 3.7% (-0.6% to 8.1%)      |
| 31 | Sierra Leone | Other exposure to mechanical forces             | 0 (0 to 0) | 0 (0 to 0) | -10.9% (-15.1% to -7%)    |
| 32 | Sierra Leone | Other road injuries                             | 0 (0 to 0) | 0 (0 to 0) | 16.2% (6.3% to 26.1%)     |
| 33 | Sierra Leone | Other transport injuries                        | 0 (0 to 1) | 0 (0 to 1) | -3.2% (-7.1% to 1.3%)     |
| 34 | Sierra Leone | Other unintentional injuries                    | 0 (0 to 1) | 0 (0 to 0) | -14.9% (-19.5% to -10.2%) |
| 35 | Sierra Leone | Pedestrian road injuries                        | 1 (1 to 2) | 1 (1 to 3) | 15.4% (7.2% to 23.4%)     |
| 36 | Sierra Leone | Physical violence by firearm                    | 0 (0 to 0) | 0 (0 to 0) | 22.8% (6.8% to 41.5%)     |
| 37 | Sierra Leone | Physical violence by other means                | 0 (0 to 0) | 0 (0 to 0) | -6.6% (-12% to -1.1%)     |
| 38 | Sierra Leone | Physical violence by sharp object               | 0 (0 to 0) | 0 (0 to 0) | -5.1% (-11.8% to 1.4%)    |
| 39 | Sierra Leone | Poisoning by carbon monoxide                    | 0 (0 to 0) | 0 (0 to 0) | 9.2% (-3.2% to 24.7%)     |
| 40 | Sierra Leone | Poisoning by other means                        | 0 (0 to 0) | 0 (0 to 0) | -20.9% (-27.6% to -14.2%) |
| 41 | Sierra Leone | Pulmonary aspiration and foreign body in airway | 0 (0 to 0) | 0 (0 to 0) | -5.8% (-15.3% to 4.6%)    |
| 42 | Sierra Leone | Self-harm by firearm                            | 0 (0 to 0) | 0 (0 to 0) | 25.8% (13.5% to 40.3%)    |
| 43 | Sierra Leone | Self-harm by other specified means              | 0 (0 to 0) | 0 (0 to 0) | 36.6% (30.9% to 43%)      |
| 44 | Sierra Leone | Unintentional firearm injuries                  | 0 (0 to 0) | 0 (0 to 0) | -14.4% (-21.2% to -8%)    |
| 45 |              |                                                 |            |            |                           |
| 46 |              |                                                 |            |            |                           |

|    |              |                                                 |             |             |                           |
|----|--------------|-------------------------------------------------|-------------|-------------|---------------------------|
| 1  |              |                                                 |             |             |                           |
| 2  | Sierra Leone | Venomous animal contact                         | 0 (0 to 0)  | 0 (0 to 0)  | 6.9% (-0.2% to 13.9%)     |
| 3  | Singapore    | Adverse effects of medical treatment            | 0 (0 to 0)  | 0 (0 to 0)  | 0% (0% to 0%)             |
| 4  | Singapore    | Conflict and terrorism                          | 0 (0 to 0)  | 0 (0 to 0)  | NA                        |
| 5  | Singapore    | Cyclist road injuries                           | 0 (0 to 0)  | 0 (0 to 0)  | -23.3% (-32.3% to -12.9%) |
| 6  | Singapore    | Drowning                                        | 0 (0 to 0)  | 0 (0 to 0)  | 135.7% (114.5% to 155.4%) |
| 7  | Singapore    | Environmental heat and cold exposure            | 0 (0 to 0)  | 0 (0 to 0)  | 10.6% (6.4% to 15.3%)     |
| 8  | Singapore    | Executions and police conflict                  | 0 (0 to 0)  | 0 (0 to 0)  | NA                        |
| 9  | Singapore    | Exposure to forces of nature                    | 0 (0 to 0)  | 0 (0 to 0)  | NA                        |
| 10 | Singapore    | Falls                                           | 3 (2 to 4)  | 3 (3 to 5)  | 3.7% (-1.1% to 8.4%)      |
| 11 | Singapore    | Fire, heat, and hot substances                  | 0 (0 to 0)  | 0 (0 to 0)  | 1.4% (-2.8% to 5.4%)      |
| 12 | Singapore    | Foreign body in eyes                            | 0 (0 to 0)  | 0 (0 to 0)  | 0% (0% to 0%)             |
| 13 | Singapore    | Foreign body in other body part                 | 0 (0 to 1)  | 0 (0 to 1)  | -4% (-6.7% to -0.9%)      |
| 14 | Singapore    | Motor vehicle road injuries                     | 0 (0 to 1)  | 0 (0 to 0)  | -18.3% (-28.7% to -7.4%)  |
| 15 | Singapore    | Motorcyclist road injuries                      | 0 (0 to 0)  | 0 (0 to 0)  | -42.5% (-52.7% to -31.5%) |
| 16 | Singapore    | Non-venomous animal contact                     | 0 (0 to 0)  | 0 (0 to 0)  | -26.5% (-29.5% to -23.3%) |
| 17 | Singapore    | Other exposure to mechanical forces             | 1 (0 to 2)  | 1 (0 to 1)  | -11.7% (-19% to -5.5%)    |
| 18 | Singapore    | Other road injuries                             | 0 (0 to 0)  | 0 (0 to 0)  | -15.9% (-26.4% to -4.4%)  |
| 19 | Singapore    | Other transport injuries                        | 0 (0 to 0)  | 0 (0 to 0)  | -5.5% (-8.9% to -1.8%)    |
| 20 | Singapore    | Other unintentional injuries                    | 0 (0 to 1)  | 0 (0 to 1)  | -18.2% (-24.3% to -12.5%) |
| 21 | Singapore    | Pedestrian road injuries                        | 0 (0 to 0)  | 0 (0 to 0)  | -25.6% (-37.3% to -12.5%) |
| 22 | Singapore    | Physical violence by firearm                    | 0 (0 to 0)  | 0 (0 to 0)  | 43.2% (22.7% to 69%)      |
| 23 | Singapore    | Physical violence by other means                | 0 (0 to 0)  | 0 (0 to 0)  | -28% (-38.4% to -18.2%)   |
| 24 | Singapore    | Physical violence by sharp object               | 0 (0 to 0)  | 0 (0 to 0)  | -34.5% (-47% to -21.7%)   |
| 25 | Singapore    | Poisoning by carbon monoxide                    | 0 (0 to 0)  | 0 (0 to 0)  | 14.7% (4.7% to 24.7%)     |
| 26 | Singapore    | Poisoning by other means                        | 0 (0 to 0)  | 0 (0 to 0)  | -5% (-9.9% to 0%)         |
| 27 | Singapore    | Pulmonary aspiration and foreign body in airway | 0 (0 to 0)  | 0 (0 to 0)  | -15.1% (-21.1% to -8%)    |
| 28 | Singapore    | Self-harm by firearm                            | 0 (0 to 0)  | 0 (0 to 0)  | 13.1% (-1.1% to 32.9%)    |
| 29 | Singapore    | Self-harm by other specified means              | 0 (0 to 1)  | 0 (0 to 0)  | -35.6% (-39.4% to -31%)   |
| 30 | Singapore    | Unintentional firearm injuries                  | 0 (0 to 0)  | 0 (0 to 0)  | 0.4% (-9.1% to 10%)       |
| 31 | Singapore    | Venomous animal contact                         | 0 (0 to 0)  | 0 (0 to 0)  | -23.7% (-28.2% to -18.7%) |
| 32 | Slovakia     | Adverse effects of medical treatment            | 0 (0 to 0)  | 0 (0 to 0)  | 0% (0% to 0%)             |
| 33 | Slovakia     | Conflict and terrorism                          | 0 (0 to 0)  | 0 (0 to 0)  | NA                        |
| 34 | Slovakia     | Cyclist road injuries                           | 1 (0 to 1)  | 1 (0 to 1)  | -30.8% (-39% to -22%)     |
| 35 | Slovakia     | Drowning                                        | 0 (0 to 0)  | 0 (0 to 0)  | 93% (73.6% to 118.5%)     |
| 36 | Slovakia     | Environmental heat and cold exposure            | 0 (0 to 0)  | 0 (0 to 0)  | -6.4% (-11.1% to -1.6%)   |
| 37 | Slovakia     | Executions and police conflict                  | 0 (0 to 0)  | 0 (0 to 0)  | NA                        |
| 38 | Slovakia     | Exposure to forces of nature                    | 0 (0 to 0)  | 0 (0 to 0)  | NA                        |
| 39 | Slovakia     | Falls                                           | 8 (6 to 11) | 8 (6 to 11) | 3.5% (-0.6% to 8.2%)      |
| 40 | Slovakia     | Fire, heat, and hot substances                  | 0 (0 to 0)  | 0 (0 to 0)  | -4.4% (-9% to 0.3%)       |
| 41 | Slovakia     | Foreign body in eyes                            | 0 (0 to 0)  | 0 (0 to 0)  | 0% (0% to 0%)             |
| 42 | Slovakia     | Foreign body in other body part                 | 0 (0 to 0)  | 0 (0 to 0)  | 1.7% (-2.5% to 5.2%)      |
| 43 | Slovakia     | Motor vehicle road injuries                     | 2 (1 to 3)  | 1 (1 to 2)  | -26.1% (-34.4% to -17.4%) |
| 44 | Slovakia     | Motorcyclist road injuries                      | 0 (0 to 0)  | 0 (0 to 0)  | -19.6% (-31.3% to -7%)    |
| 45 |              |                                                 |             |             |                           |
| 46 |              |                                                 |             |             |                           |

|    |          |                                                 |              |              |                           |
|----|----------|-------------------------------------------------|--------------|--------------|---------------------------|
| 1  |          |                                                 |              |              |                           |
| 2  | Slovakia | Non-venomous animal contact                     | 0 (0 to 0)   | 0 (0 to 0)   | -21.4% (-24.9% to -18.3%) |
| 3  | Slovakia | Other exposure to mechanical forces             | 2 (1 to 3)   | 2 (1 to 3)   | -9% (-16.4% to -2.8%)     |
| 4  | Slovakia | Other road injuries                             | 0 (0 to 0)   | 0 (0 to 0)   | -6.2% (-16.9% to 5.8%)    |
| 5  | Slovakia | Other transport injuries                        | 0 (0 to 0)   | 0 (0 to 0)   | -19.1% (-23.8% to -14.3%) |
| 6  | Slovakia | Other unintentional injuries                    | 0 (0 to 0)   | 0 (0 to 0)   | -10.7% (-15.9% to -5%)    |
| 7  | Slovakia | Pedestrian road injuries                        | 1 (0 to 1)   | 0 (0 to 1)   | -44.5% (-51.4% to -37%)   |
| 8  | Slovakia | Physical violence by firearm                    | 0 (0 to 0)   | 0 (0 to 0)   | 32.7% (15.9% to 50.9%)    |
| 9  | Slovakia | Physical violence by other means                | 0 (0 to 1)   | 0 (0 to 1)   | -19.2% (-26.4% to -12%)   |
| 10 | Slovakia | Physical violence by sharp object               | 0 (0 to 0)   | 0 (0 to 0)   | -24.3% (-32.9% to -16.2%) |
| 11 | Slovakia | Poisoning by carbon monoxide                    | 0 (0 to 0)   | 0 (0 to 0)   | 30% (19.5% to 42.4%)      |
| 12 | Slovakia | Poisoning by other means                        | 0 (0 to 0)   | 0 (0 to 0)   | -1.5% (-8.8% to 5.4%)     |
| 13 | Slovakia | Pulmonary aspiration and foreign body in airway | 0 (0 to 0)   | 0 (0 to 0)   | -17.2% (-23.1% to -10.4%) |
| 14 | Slovakia | Self-harm by firearm                            | 0 (0 to 0)   | 0 (0 to 0)   | -3.6% (-15.7% to 10.4%)   |
| 15 | Slovakia | Self-harm by other specified means              | 0 (0 to 0)   | 0 (0 to 0)   | -15% (-19.7% to -9.9%)    |
| 16 | Slovakia | Unintentional firearm injuries                  | 0 (0 to 0)   | 0 (0 to 0)   | -16% (-26% to -7%)        |
| 17 | Slovakia | Venomous animal contact                         | 0 (0 to 0)   | 0 (0 to 0)   | -17.8% (-22.5% to -12.1%) |
| 18 | Slovenia | Adverse effects of medical treatment            | 0 (0 to 0)   | 0 (0 to 0)   | 0% (0% to 0%)             |
| 19 | Slovenia | Conflict and terrorism                          | 0 (0 to 0)   | 0 (0 to 0)   | NA                        |
| 20 | Slovenia | Cyclist road injuries                           | 1 (0 to 2)   | 1 (0 to 1)   | -30.1% (-37.8% to -20.6%) |
| 21 | Slovenia | Drowning                                        | 0 (0 to 0)   | 0 (0 to 0)   | 142.8% (116.2% to 172.6%) |
| 22 | Slovenia | Environmental heat and cold exposure            | 0 (0 to 0)   | 0 (0 to 0)   | -40.7% (-46.4% to -35.1%) |
| 23 | Slovenia | Executions and police conflict                  | 0 (0 to 0)   | 0 (0 to 0)   | NA                        |
| 24 | Slovenia | Exposure to forces of nature                    | 0 (0 to 0)   | 0 (0 to 0)   | NA                        |
| 25 | Slovenia | Falls                                           | 10 (7 to 13) | 10 (7 to 13) | 0% (-4.5% to 4.8%)        |
| 26 | Slovenia | Fire, heat, and hot substances                  | 0 (0 to 0)   | 0 (0 to 0)   | 0.4% (-4.7% to 5.5%)      |
| 27 | Slovenia | Foreign body in eyes                            | 0 (0 to 0)   | 0 (0 to 0)   | 0% (0% to 0%)             |
| 28 | Slovenia | Foreign body in other body part                 | 0 (0 to 0)   | 0 (0 to 0)   | 2.7% (-1.4% to 6.9%)      |
| 29 | Slovenia | Motor vehicle road injuries                     | 3 (2 to 5)   | 2 (1 to 3)   | -50.5% (-56% to -45.1%)   |
| 30 | Slovenia | Motorcyclist road injuries                      | 0 (0 to 1)   | 0 (0 to 1)   | -12.4% (-25.4% to 4.3%)   |
| 31 | Slovenia | Non-venomous animal contact                     | 0 (0 to 0)   | 0 (0 to 0)   | -16.1% (-19.9% to -12%)   |
| 32 | Slovenia | Other exposure to mechanical forces             | 2 (1 to 4)   | 2 (1 to 4)   | -15.1% (-22.1% to -8.1%)  |
| 33 | Slovenia | Other road injuries                             | 0 (0 to 0)   | 0 (0 to 0)   | -10.3% (-21.7% to 1.7%)   |
| 34 | Slovenia | Other transport injuries                        | 0 (0 to 0)   | 0 (0 to 0)   | -2.9% (-7.5% to 1.3%)     |
| 35 | Slovenia | Other unintentional injuries                    | 0 (0 to 1)   | 0 (0 to 1)   | 8.7% (2.2% to 15.2%)      |
| 36 | Slovenia | Pedestrian road injuries                        | 0 (0 to 1)   | 0 (0 to 1)   | -38.1% (-48.1% to -26.3%) |
| 37 | Slovenia | Physical violence by firearm                    | 0 (0 to 0)   | 0 (0 to 0)   | 24.7% (9.8% to 41.6%)     |
| 38 | Slovenia | Physical violence by other means                | 0 (0 to 1)   | 0 (0 to 1)   | -20.8% (-29.9% to -12.7%) |
| 39 | Slovenia | Physical violence by sharp object               | 0 (0 to 0)   | 0 (0 to 0)   | -29% (-39.6% to -19.1%)   |
| 40 | Slovenia | Poisoning by carbon monoxide                    | 0 (0 to 0)   | 0 (0 to 0)   | 33.7% (23.3% to 44.7%)    |
| 41 | Slovenia | Poisoning by other means                        | 0 (0 to 0)   | 0 (0 to 0)   | 1.7% (-5.4% to 9%)        |
| 42 | Slovenia | Pulmonary aspiration and foreign body in airway | 0 (0 to 0)   | 0 (0 to 0)   | -5.9% (-13.1% to 1.6%)    |
| 43 | Slovenia | Self-harm by firearm                            | 0 (0 to 0)   | 0 (0 to 0)   | -18.6% (-28.4% to -5.3%)  |
| 44 | Slovenia | Self-harm by other specified means              | 1 (0 to 1)   | 0 (0 to 1)   | -39.2% (-43% to -35.1%)   |
| 45 |          |                                                 |              |              |                           |
| 46 |          |                                                 |              |              |                           |

|    |                 |                                                 |              |            |                           |
|----|-----------------|-------------------------------------------------|--------------|------------|---------------------------|
| 1  |                 |                                                 |              |            |                           |
| 2  | Slovenia        | Unintentional firearm injuries                  | 0 (0 to 0)   | 0 (0 to 0) | 1.4% (-9.5% to 12.8%)     |
| 3  | Slovenia        | Venomous animal contact                         | 0 (0 to 0)   | 0 (0 to 0) | -11.2% (-16.1% to -4.9%)  |
| 4  | Solomon Islands | Adverse effects of medical treatment            | 0 (0 to 0)   | 0 (0 to 0) | 0% (0% to 0%)             |
| 5  | Solomon Islands | Conflict and terrorism                          | 0 (0 to 0)   | 0 (0 to 0) | NA                        |
| 6  | Solomon Islands | Cyclist road injuries                           | 0 (0 to 0)   | 0 (0 to 0) | 7.2% (-0.1% to 14.9%)     |
| 7  | Solomon Islands | Drowning                                        | 0 (0 to 0)   | 0 (0 to 0) | 3.5% (-6.2% to 13.9%)     |
| 8  | Solomon Islands | Environmental heat and cold exposure            | 0 (0 to 0)   | 0 (0 to 0) | -4.8% (-10.3% to 0.8%)    |
| 9  | Solomon Islands | Executions and police conflict                  | 0 (0 to 0)   | 0 (0 to 0) | NA                        |
| 10 | Solomon Islands | Exposure to forces of nature                    | 0 (0 to 0)   | 0 (0 to 0) | NA                        |
| 11 | Solomon Islands | Falls                                           | 2 (2 to 3)   | 3 (2 to 4) | 40.9% (35.6% to 46.6%)    |
| 12 | Solomon Islands | Fire, heat, and hot substances                  | 0 (0 to 0)   | 0 (0 to 0) | -10.4% (-16.3% to -5%)    |
| 13 | Solomon Islands | Foreign body in eyes                            | 0 (0 to 0)   | 0 (0 to 0) | 0% (0% to 0%)             |
| 14 | Solomon Islands | Foreign body in other body part                 | 0 (0 to 0)   | 0 (0 to 0) | -2.8% (-5.8% to 0.5%)     |
| 15 | Solomon Islands | Motor vehicle road injuries                     | 0 (0 to 1)   | 0 (0 to 1) | -3.2% (-10% to 3.8%)      |
| 16 | Solomon Islands | Motorcyclist road injuries                      | 0 (0 to 0)   | 0 (0 to 0) | 5.5% (-3.6% to 14.9%)     |
| 17 | Solomon Islands | Non-venomous animal contact                     | 0 (0 to 0)   | 0 (0 to 0) | -15.9% (-20% to -12%)     |
| 18 | Solomon Islands | Other exposure to mechanical forces             | 0 (0 to 0)   | 0 (0 to 0) | -12.5% (-18.9% to -6.8%)  |
| 19 | Solomon Islands | Other road injuries                             | 0 (0 to 0)   | 0 (0 to 0) | 4.3% (-4.2% to 13.6%)     |
| 20 | Solomon Islands | Other transport injuries                        | 0 (0 to 0)   | 0 (0 to 0) | -8.8% (-12.9% to -5.5%)   |
| 21 | Solomon Islands | Other unintentional injuries                    | 0 (0 to 0)   | 0 (0 to 0) | -6.5% (-11.2% to -1.2%)   |
| 22 | Solomon Islands | Pedestrian road injuries                        | 0 (0 to 0)   | 0 (0 to 0) | 1.4% (-6.5% to 9.6%)      |
| 23 | Solomon Islands | Physical violence by firearm                    | 0 (0 to 0)   | 0 (0 to 0) | -13.1% (-24.2% to -1.9%)  |
| 24 | Solomon Islands | Physical violence by other means                | 0 (0 to 1)   | 0 (0 to 1) | -27.3% (-33.2% to -21.7%) |
| 25 | Solomon Islands | Physical violence by sharp object               | 0 (0 to 0)   | 0 (0 to 0) | -35.3% (-41.6% to -29.1%) |
| 26 | Solomon Islands | Poisoning by carbon monoxide                    | 0 (0 to 0)   | 0 (0 to 0) | 28.7% (16.1% to 44%)      |
| 27 | Solomon Islands | Poisoning by other means                        | 0 (0 to 0)   | 0 (0 to 0) | 0.1% (-7.9% to 8%)        |
| 28 | Solomon Islands | Pulmonary aspiration and foreign body in airway | 0 (0 to 0)   | 0 (0 to 0) | -0.4% (-11% to 11.1%)     |
| 29 | Solomon Islands | Self-harm by firearm                            | 0 (0 to 0)   | 0 (0 to 0) | -1.7% (-17.2% to 13.4%)   |
| 30 | Solomon Islands | Self-harm by other specified means              | 0 (0 to 0)   | 0 (0 to 0) | 16.4% (8.7% to 25.6%)     |
| 31 | Solomon Islands | Unintentional firearm injuries                  | 0 (0 to 0)   | 0 (0 to 0) | -14% (-19.5% to -8.4%)    |
| 32 | Solomon Islands | Venomous animal contact                         | 0 (0 to 0)   | 0 (0 to 0) | -10.1% (-16.8% to -2.8%)  |
| 33 | Somalia         | Adverse effects of medical treatment            | 0 (0 to 0)   | 0 (0 to 0) | 0% (0% to 0%)             |
| 34 | Somalia         | Conflict and terrorism                          | 11 (2 to 37) | 2 (0 to 8) | NA                        |
| 35 | Somalia         | Cyclist road injuries                           | 1 (1 to 2)   | 1 (1 to 3) | 9.5% (1.8% to 18.2%)      |
| 36 | Somalia         | Drowning                                        | 0 (0 to 0)   | 0 (0 to 0) | -13.3% (-18.3% to -7.6%)  |
| 37 | Somalia         | Environmental heat and cold exposure            | 0 (0 to 0)   | 0 (0 to 0) | -6.3% (-11% to -1.8%)     |
| 38 | Somalia         | Executions and police conflict                  | 0 (0 to 0)   | 0 (0 to 0) | NA                        |
| 39 | Somalia         | Exposure to forces of nature                    | 0 (0 to 0)   | 0 (0 to 0) | NA                        |
| 40 | Somalia         | Falls                                           | 3 (2 to 4)   | 3 (2 to 4) | 10.2% (6.4% to 13.6%)     |
| 41 | Somalia         | Fire, heat, and hot substances                  | 0 (0 to 0)   | 0 (0 to 0) | -11.3% (-15.6% to -6.7%)  |
| 42 | Somalia         | Foreign body in eyes                            | 0 (0 to 0)   | 0 (0 to 0) | 0% (0% to 0%)             |
| 43 | Somalia         | Foreign body in other body part                 | 1 (0 to 1)   | 1 (0 to 1) | -4.2% (-8.7% to -0.3%)    |
| 44 | Somalia         | Motor vehicle road injuries                     | 1 (0 to 2)   | 1 (0 to 2) | -9.1% (-16.5% to -0.9%)   |
| 45 |                 |                                                 |              |            |                           |
| 46 |                 |                                                 |              |            |                           |

|    |              |                                                 |            |            |                           |
|----|--------------|-------------------------------------------------|------------|------------|---------------------------|
| 1  |              |                                                 |            |            |                           |
| 2  | Somalia      | Motorcyclist road injuries                      | 1 (0 to 1) | 1 (0 to 1) | 20.9% (11.6% to 32%)      |
| 3  | Somalia      | Non-venomous animal contact                     | 1 (0 to 1) | 1 (0 to 2) | 2.3% (-2.3% to 7.1%)      |
| 4  | Somalia      | Other exposure to mechanical forces             | 0 (0 to 0) | 0 (0 to 0) | -6.1% (-10.8% to -0.3%)   |
| 5  | Somalia      | Other road injuries                             | 0 (0 to 0) | 0 (0 to 0) | -6.3% (-13.9% to 1.5%)    |
| 6  | Somalia      | Other transport injuries                        | 0 (0 to 1) | 0 (0 to 1) | 7.8% (2.6% to 12.9%)      |
| 7  | Somalia      | Other unintentional injuries                    | 0 (0 to 1) | 0 (0 to 0) | -11% (-14.9% to -6.7%)    |
| 8  | Somalia      | Pedestrian road injuries                        | 2 (1 to 4) | 2 (1 to 3) | -12% (-17.5% to -6.2%)    |
| 9  | Somalia      | Physical violence by firearm                    | 0 (0 to 0) | 0 (0 to 0) | 24% (13.3% to 34.6%)      |
| 10 | Somalia      | Physical violence by other means                | 0 (0 to 0) | 0 (0 to 0) | 17.3% (9.1% to 25.7%)     |
| 11 | Somalia      | Physical violence by sharp object               | 0 (0 to 0) | 0 (0 to 0) | 23% (13.3% to 33.5%)      |
| 12 | Somalia      | Poisoning by carbon monoxide                    | 0 (0 to 0) | 0 (0 to 0) | 3.5% (-7.2% to 15.7%)     |
| 13 | Somalia      | Poisoning by other means                        | 0 (0 to 0) | 0 (0 to 0) | -18.3% (-23.9% to -11.8%) |
| 14 | Somalia      | Pulmonary aspiration and foreign body in airway | 0 (0 to 0) | 0 (0 to 0) | -5.9% (-16.5% to 5.9%)    |
| 15 | Somalia      | Self-harm by firearm                            | 0 (0 to 0) | 0 (0 to 0) | 11.3% (-1.2% to 26.1%)    |
| 16 | Somalia      | Self-harm by other specified means              | 0 (0 to 0) | 0 (0 to 0) | 1.6% (-3% to 6.8%)        |
| 17 | Somalia      | Unintentional firearm injuries                  | 0 (0 to 0) | 0 (0 to 0) | -3.3% (-9.6% to 4.2%)     |
| 18 | Somalia      | Venomous animal contact                         | 0 (0 to 0) | 0 (0 to 0) | 4.2% (-2.2% to 11.6%)     |
| 19 | South Africa | Adverse effects of medical treatment            | 0 (0 to 0) | 0 (0 to 0) | 0% (0% to 0%)             |
| 20 | South Africa | Conflict and terrorism                          | 0 (0 to 1) | 0 (0 to 0) | NA                        |
| 21 | South Africa | Cyclist road injuries                           | 1 (0 to 1) | 1 (0 to 1) | -1.8% (-7.6% to 4.3%)     |
| 22 | South Africa | Drowning                                        | 0 (0 to 0) | 0 (0 to 0) | -35.5% (-42.2% to -26.4%) |
| 23 | South Africa | Environmental heat and cold exposure            | 0 (0 to 0) | 0 (0 to 0) | -5.9% (-10.6% to -1.2%)   |
| 24 | South Africa | Executions and police conflict                  | 0 (0 to 0) | 0 (0 to 0) | NA                        |
| 25 | South Africa | Exposure to forces of nature                    | 0 (0 to 0) | 0 (0 to 0) | NA                        |
| 26 | South Africa | Falls                                           | 3 (2 to 4) | 2 (2 to 4) | -6.3% (-8.6% to -3.8%)    |
| 27 | South Africa | Fire, heat, and hot substances                  | 0 (0 to 0) | 0 (0 to 0) | -30.7% (-35% to -26.2%)   |
| 28 | South Africa | Foreign body in eyes                            | 0 (0 to 0) | 0 (0 to 0) | 0% (0% to 0%)             |
| 29 | South Africa | Foreign body in other body part                 | 1 (1 to 2) | 1 (1 to 2) | -1.3% (-2.9% to 0.4%)     |
| 30 | South Africa | Motor vehicle road injuries                     | 2 (1 to 3) | 1 (1 to 2) | -23.4% (-28.5% to -18.2%) |
| 31 | South Africa | Motorcyclist road injuries                      | 0 (0 to 1) | 0 (0 to 1) | -21.2% (-26.8% to -16%)   |
| 32 | South Africa | Non-venomous animal contact                     | 0 (0 to 0) | 0 (0 to 0) | -11.3% (-15.6% to -6.3%)  |
| 33 | South Africa | Other exposure to mechanical forces             | 0 (0 to 1) | 0 (0 to 0) | -24.5% (-27.8% to -20.9%) |
| 34 | South Africa | Other road injuries                             | 0 (0 to 0) | 0 (0 to 0) | -0.4% (-7.4% to 6.4%)     |
| 35 | South Africa | Other transport injuries                        | 0 (0 to 1) | 0 (0 to 1) | -9.6% (-13.5% to -5.8%)   |
| 36 | South Africa | Other unintentional injuries                    | 0 (0 to 0) | 0 (0 to 0) | -15.1% (-19.4% to -10.9%) |
| 37 | South Africa | Pedestrian road injuries                        | 2 (1 to 3) | 1 (1 to 2) | -23.7% (-28.7% to -18.5%) |
| 38 | South Africa | Physical violence by firearm                    | 0 (0 to 0) | 0 (0 to 0) | -60.1% (-67.1% to -50.2%) |
| 39 | South Africa | Physical violence by other means                | 1 (0 to 2) | 0 (0 to 1) | -39.2% (-42.7% to -35.3%) |
| 40 | South Africa | Physical violence by sharp object               | 0 (0 to 1) | 0 (0 to 1) | -37.2% (-41.2% to -32.3%) |
| 41 | South Africa | Poisoning by carbon monoxide                    | 0 (0 to 0) | 0 (0 to 0) | -2.4% (-23.3% to 15.4%)   |
| 42 | South Africa | Poisoning by other means                        | 0 (0 to 0) | 0 (0 to 0) | -16.9% (-35.5% to 1.9%)   |
| 43 | South Africa | Pulmonary aspiration and foreign body in airway | 0 (0 to 0) | 0 (0 to 0) | -15.5% (-21.6% to -10.4%) |
| 44 | South Africa | Self-harm by firearm                            | 0 (0 to 0) | 0 (0 to 0) | -9.7% (-19.2% to 3.1%)    |
| 45 |              |                                                 |            |            |                           |
| 46 |              |                                                 |            |            |                           |

|    |              |                                                 |            |            |                           |
|----|--------------|-------------------------------------------------|------------|------------|---------------------------|
| 1  |              |                                                 |            |            |                           |
| 2  | South Africa | Self-harm by other specified means              | 0 (0 to 0) | 0 (0 to 0) | -34.3% (-39.4% to -29%)   |
| 3  | South Africa | Unintentional firearm injuries                  | 0 (0 to 0) | 0 (0 to 0) | -14.1% (-20.6% to -5.7%)  |
| 4  | South Africa | Venomous animal contact                         | 0 (0 to 0) | 0 (0 to 0) | -3.5% (-12.7% to 6.3%)    |
| 5  | South Sudan  | Adverse effects of medical treatment            | 0 (0 to 0) | 0 (0 to 0) | 0% (0% to 0%)             |
| 6  | South Sudan  | Conflict and terrorism                          | 0 (0 to 0) | 2 (0 to 5) | NA                        |
| 7  | South Sudan  | Cyclist road injuries                           | 1 (1 to 3) | 1 (1 to 3) | -6.2% (-12.1% to 0.1%)    |
| 8  | South Sudan  | Drowning                                        | 0 (0 to 0) | 0 (0 to 0) | -11.1% (-17.3% to -5.1%)  |
| 9  | South Sudan  | Environmental heat and cold exposure            | 0 (0 to 0) | 0 (0 to 0) | -7.7% (-11.9% to -3.4%)   |
| 10 | South Sudan  | Executions and police conflict                  | 0 (0 to 0) | 0 (0 to 0) | NA                        |
| 11 | South Sudan  | Exposure to forces of nature                    | 0 (0 to 0) | 0 (0 to 0) | NA                        |
| 12 | South Sudan  | Falls                                           | 3 (2 to 4) | 3 (2 to 4) | 6.8% (3.2% to 10.9%)      |
| 13 | South Sudan  | Fire, heat, and hot substances                  | 0 (0 to 0) | 0 (0 to 0) | -9.9% (-14.2% to -6.3%)   |
| 14 | South Sudan  | Foreign body in eyes                            | 0 (0 to 0) | 0 (0 to 0) | 0% (0% to 0%)             |
| 15 | South Sudan  | Foreign body in other body part                 | 1 (0 to 1) | 1 (0 to 1) | -5.7% (-9.1% to -2.3%)    |
| 16 | South Sudan  | Motor vehicle road injuries                     | 2 (1 to 3) | 1 (1 to 3) | -11.1% (-17.3% to -4.3%)  |
| 17 | South Sudan  | Motorcyclist road injuries                      | 1 (0 to 1) | 0 (0 to 1) | -9.7% (-16.4% to -2.9%)   |
| 18 | South Sudan  | Non-venomous animal contact                     | 1 (0 to 1) | 0 (0 to 1) | -10.5% (-14.5% to -6.9%)  |
| 19 | South Sudan  | Other exposure to mechanical forces             | 0 (0 to 1) | 0 (0 to 1) | -9.9% (-13.9% to -5.9%)   |
| 20 | South Sudan  | Other road injuries                             | 0 (0 to 0) | 0 (0 to 0) | -7.5% (-15.2% to 0.7%)    |
| 21 | South Sudan  | Other transport injuries                        | 0 (0 to 1) | 0 (0 to 1) | -5.7% (-9.1% to -1.9%)    |
| 22 | South Sudan  | Other unintentional injuries                    | 0 (0 to 1) | 0 (0 to 0) | -13.1% (-16.7% to -9.2%)  |
| 23 | South Sudan  | Pedestrian road injuries                        | 3 (1 to 5) | 2 (1 to 4) | -19.3% (-24.5% to -13.9%) |
| 24 | South Sudan  | Physical violence by firearm                    | 0 (0 to 0) | 0 (0 to 0) | 52.9% (38.9% to 69.8%)    |
| 25 | South Sudan  | Physical violence by other means                | 0 (0 to 0) | 0 (0 to 1) | 47.8% (36.9% to 59.8%)    |
| 26 | South Sudan  | Physical violence by sharp object               | 0 (0 to 0) | 0 (0 to 0) | 50.3% (36.6% to 65%)      |
| 27 | South Sudan  | Poisoning by carbon monoxide                    | 0 (0 to 0) | 0 (0 to 0) | 8.3% (-0.8% to 20.1%)     |
| 28 | South Sudan  | Poisoning by other means                        | 0 (0 to 0) | 0 (0 to 0) | -15.7% (-21.6% to -10.1%) |
| 29 | South Sudan  | Pulmonary aspiration and foreign body in airway | 0 (0 to 0) | 0 (0 to 0) | -5.4% (-15.6% to 5.3%)    |
| 30 | South Sudan  | Self-harm by firearm                            | 0 (0 to 0) | 0 (0 to 0) | 1.2% (-9.7% to 15%)       |
| 31 | South Sudan  | Self-harm by other specified means              | 0 (0 to 0) | 0 (0 to 0) | -10.7% (-15.4% to -6.3%)  |
| 32 | South Sudan  | Unintentional firearm injuries                  | 0 (0 to 0) | 0 (0 to 0) | -13.3% (-19.3% to -7.9%)  |
| 33 | South Sudan  | Venomous animal contact                         | 0 (0 to 0) | 0 (0 to 0) | -10.1% (-16.8% to -4.1%)  |
| 34 | Spain        | Adverse effects of medical treatment            | 0 (0 to 0) | 0 (0 to 0) | 0% (0% to 0%)             |
| 35 | Spain        | Conflict and terrorism                          | 0 (0 to 0) | 0 (0 to 0) | NA                        |
| 36 | Spain        | Cyclist road injuries                           | 0 (0 to 0) | 0 (0 to 0) | -25.6% (-37.5% to -11.4%) |
| 37 | Spain        | Drowning                                        | 0 (0 to 0) | 0 (0 to 0) | 39.8% (26.3% to 51.6%)    |
| 38 | Spain        | Environmental heat and cold exposure            | 0 (0 to 0) | 0 (0 to 0) | -2.4% (-6.7% to 2.4%)     |
| 39 | Spain        | Executions and police conflict                  | 0 (0 to 0) | 0 (0 to 0) | NA                        |
| 40 | Spain        | Exposure to forces of nature                    | 0 (0 to 0) | 0 (0 to 0) | NA                        |
| 41 | Spain        | Falls                                           | 4 (3 to 5) | 5 (4 to 7) | 28.4% (21.3% to 35.7%)    |
| 42 | Spain        | Fire, heat, and hot substances                  | 0 (0 to 0) | 0 (0 to 0) | -5.8% (-10.3% to -1%)     |
| 43 | Spain        | Foreign body in eyes                            | 0 (0 to 0) | 0 (0 to 0) | 0% (0% to 0%)             |
| 44 | Spain        | Foreign body in other body part                 | 0 (0 to 0) | 0 (0 to 0) | 3.1% (-0.9% to 6.7%)      |
| 45 |              |                                                 |            |            |                           |
| 46 |              |                                                 |            |            |                           |

|    |           |                                                 |              |            |                           |
|----|-----------|-------------------------------------------------|--------------|------------|---------------------------|
| 1  |           |                                                 |              |            |                           |
| 2  | Spain     | Motor vehicle road injuries                     | 1 (0 to 2)   | 0 (0 to 1) | -65.2% (-71.4% to -58.9%) |
| 3  | Spain     | Motorcyclist road injuries                      | 0 (0 to 0)   | 0 (0 to 0) | -40.8% (-52.8% to -25.5%) |
| 4  | Spain     | Non-venomous animal contact                     | 0 (0 to 0)   | 0 (0 to 0) | -13.8% (-17.4% to -10.2%) |
| 5  | Spain     | Other exposure to mechanical forces             | 1 (0 to 1)   | 0 (0 to 1) | -17.1% (-26.1% to -10%)   |
| 6  | Spain     | Other road injuries                             | 0 (0 to 0)   | 0 (0 to 0) | -22.3% (-35% to -7.7%)    |
| 7  | Spain     | Other transport injuries                        | 0 (0 to 0)   | 0 (0 to 0) | -7.8% (-12.5% to -2.7%)   |
| 8  | Spain     | Other unintentional injuries                    | 0 (0 to 1)   | 0 (0 to 0) | -29% (-35.1% to -23.3%)   |
| 9  | Spain     | Pedestrian road injuries                        | 0 (0 to 0)   | 0 (0 to 0) | -62% (-69.6% to -53.4%)   |
| 10 | Spain     | Physical violence by firearm                    | 0 (0 to 0)   | 0 (0 to 0) | 31.3% (18.5% to 47.6%)    |
| 11 | Spain     | Physical violence by other means                | 0 (0 to 0)   | 0 (0 to 0) | -19.1% (-28.2% to -11.2%) |
| 12 | Spain     | Physical violence by sharp object               | 0 (0 to 0)   | 0 (0 to 0) | -17.2% (-28.7% to -6.5%)  |
| 13 | Spain     | Poisoning by carbon monoxide                    | 0 (0 to 0)   | 0 (0 to 0) | 4.6% (-4.6% to 13.4%)     |
| 14 | Spain     | Poisoning by other means                        | 0 (0 to 0)   | 0 (0 to 0) | -10.4% (-16.5% to -4.6%)  |
| 15 | Spain     | Pulmonary aspiration and foreign body in airway | 0 (0 to 0)   | 0 (0 to 0) | -8.4% (-16.9% to 0.4%)    |
| 16 | Spain     | Self-harm by firearm                            | 0 (0 to 0)   | 0 (0 to 0) | 5.6% (-4.9% to 18.6%)     |
| 17 | Spain     | Self-harm by other specified means              | 0 (0 to 0)   | 0 (0 to 0) | -9.9% (-14.7% to -4.7%)   |
| 18 | Spain     | Unintentional firearm injuries                  | 0 (0 to 0)   | 0 (0 to 0) | -25.5% (-35.7% to -16.6%) |
| 19 | Spain     | Venomous animal contact                         | 0 (0 to 0)   | 0 (0 to 0) | -14% (-19.2% to -7.9%)    |
| 20 | Sri Lanka | Adverse effects of medical treatment            | 0 (0 to 0)   | 0 (0 to 0) | 0% (0% to 0%)             |
| 21 | Sri Lanka | Conflict and terrorism                          | 18 (4 to 54) | 1 (0 to 2) | NA                        |
| 22 | Sri Lanka | Cyclist road injuries                           | 0 (0 to 0)   | 0 (0 to 0) | 5.7% (-3.1% to 15.3%)     |
| 23 | Sri Lanka | Drowning                                        | 0 (0 to 0)   | 0 (0 to 0) | 43.3% (28% to 58.9%)      |
| 24 | Sri Lanka | Environmental heat and cold exposure            | 0 (0 to 0)   | 0 (0 to 0) | -17.2% (-23.2% to -11%)   |
| 25 | Sri Lanka | Executions and police conflict                  | 0 (0 to 0)   | 0 (0 to 0) | NA                        |
| 26 | Sri Lanka | Exposure to forces of nature                    | 0 (0 to 0)   | 0 (0 to 0) | NA                        |
| 27 | Sri Lanka | Falls                                           | 2 (1 to 3)   | 3 (2 to 4) | 57.6% (50.5% to 64.6%)    |
| 28 | Sri Lanka | Fire, heat, and hot substances                  | 0 (0 to 0)   | 0 (0 to 0) | -24.8% (-29.7% to -20.2%) |
| 29 | Sri Lanka | Foreign body in eyes                            | 0 (0 to 0)   | 0 (0 to 0) | 0% (0% to 0%)             |
| 30 | Sri Lanka | Foreign body in other body part                 | 0 (0 to 0)   | 0 (0 to 0) | -3.6% (-6.7% to -0.1%)    |
| 31 | Sri Lanka | Motor vehicle road injuries                     | 0 (0 to 1)   | 0 (0 to 1) | 6.2% (-2.5% to 15.5%)     |
| 32 | Sri Lanka | Motorcyclist road injuries                      | 0 (0 to 1)   | 0 (0 to 1) | 13.6% (4.1% to 25.6%)     |
| 33 | Sri Lanka | Non-venomous animal contact                     | 0 (0 to 0)   | 0 (0 to 0) | -46.4% (-51% to -41.8%)   |
| 34 | Sri Lanka | Other exposure to mechanical forces             | 0 (0 to 0)   | 0 (0 to 0) | -13.6% (-22.6% to -3.9%)  |
| 35 | Sri Lanka | Other road injuries                             | 0 (0 to 0)   | 0 (0 to 0) | 1.3% (-8.3% to 11.1%)     |
| 36 | Sri Lanka | Other transport injuries                        | 0 (0 to 0)   | 0 (0 to 0) | 1.5% (-4.3% to 7.2%)      |
| 37 | Sri Lanka | Other unintentional injuries                    | 0 (0 to 0)   | 0 (0 to 0) | -50.1% (-55% to -44.3%)   |
| 38 | Sri Lanka | Pedestrian road injuries                        | 0 (0 to 0)   | 0 (0 to 0) | -12.3% (-19.1% to -4.9%)  |
| 39 | Sri Lanka | Physical violence by firearm                    | 0 (0 to 0)   | 0 (0 to 0) | 30% (13.5% to 49.5%)      |
| 40 | Sri Lanka | Physical violence by other means                | 0 (0 to 1)   | 0 (0 to 0) | -24.7% (-31.8% to -17.5%) |
| 41 | Sri Lanka | Physical violence by sharp object               | 0 (0 to 0)   | 0 (0 to 0) | -35.5% (-43.7% to -28.3%) |
| 42 | Sri Lanka | Poisoning by carbon monoxide                    | 0 (0 to 0)   | 0 (0 to 0) | 12% (-0.4% to 25.1%)      |
| 43 | Sri Lanka | Poisoning by other means                        | 0 (0 to 0)   | 0 (0 to 0) | -25.3% (-32.5% to -17.4%) |
| 44 | Sri Lanka | Pulmonary aspiration and foreign body in airway | 0 (0 to 0)   | 0 (0 to 0) | -5% (-12.4% to 3.8%)      |
| 45 |           |                                                 |              |            |                           |
| 46 |           |                                                 |              |            |                           |



|    |           |                                                 |             |            |                           |
|----|-----------|-------------------------------------------------|-------------|------------|---------------------------|
| 1  |           |                                                 |             |            |                           |
| 2  | Sri Lanka | Self-harm by firearm                            | 0 (0 to 0)  | 0 (0 to 0) | -33.3% (-51% to -15.8%)   |
| 3  | Sri Lanka | Self-harm by other specified means              | 1 (0 to 1)  | 0 (0 to 1) | -45.4% (-49.2% to -41.2%) |
| 4  | Sri Lanka | Unintentional firearm injuries                  | 0 (0 to 0)  | 0 (0 to 0) | -37.6% (-47.4% to -30%)   |
| 5  | Sri Lanka | Venomous animal contact                         | 0 (0 to 0)  | 0 (0 to 0) | -51.8% (-57.9% to -45.4%) |
| 6  | Sudan     | Adverse effects of medical treatment            | 0 (0 to 0)  | 0 (0 to 0) | 0% (0% to 0%)             |
| 7  | Sudan     | Conflict and terrorism                          | 8 (1 to 24) | 0 (0 to 0) | NA                        |
| 8  | Sudan     | Cyclist road injuries                           | 0 (0 to 1)  | 0 (0 to 1) | 8.5% (1.7% to 17.1%)      |
| 9  | Sudan     | Drowning                                        | 0 (0 to 0)  | 0 (0 to 0) | 0.6% (-11.9% to 13.8%)    |
| 10 | Sudan     | Environmental heat and cold exposure            | 0 (0 to 0)  | 0 (0 to 0) | 1.9% (-3.5% to 7.7%)      |
| 11 | Sudan     | Executions and police conflict                  | 0 (0 to 0)  | 0 (0 to 1) | NA                        |
| 12 | Sudan     | Exposure to forces of nature                    | 0 (0 to 0)  | 0 (0 to 0) | NA                        |
| 13 | Sudan     | Falls                                           | 4 (2 to 5)  | 4 (3 to 6) | 24.2% (19.5% to 28.6%)    |
| 14 | Sudan     | Fire, heat, and hot substances                  | 0 (0 to 0)  | 0 (0 to 0) | -32.5% (-37.4% to -28%)   |
| 15 | Sudan     | Foreign body in eyes                            | 0 (0 to 0)  | 0 (0 to 0) | 0% (0% to 0%)             |
| 16 | Sudan     | Foreign body in other body part                 | 0 (0 to 1)  | 0 (0 to 1) | -1.4% (-4.2% to 1.6%)     |
| 17 | Sudan     | Motor vehicle road injuries                     | 1 (0 to 2)  | 1 (0 to 2) | -7.5% (-13.5% to -1.1%)   |
| 18 | Sudan     | Motorcyclist road injuries                      | 0 (0 to 1)  | 0 (0 to 1) | -1.5% (-10.4% to 8.5%)    |
| 19 | Sudan     | Non-venomous animal contact                     | 0 (0 to 0)  | 0 (0 to 0) | -9.8% (-14% to -5.3%)     |
| 20 | Sudan     | Other exposure to mechanical forces             | 0 (0 to 1)  | 0 (0 to 1) | -10.4% (-15.7% to -5.3%)  |
| 21 | Sudan     | Other road injuries                             | 0 (0 to 0)  | 0 (0 to 0) | 13.7% (5.1% to 23.6%)     |
| 22 | Sudan     | Other transport injuries                        | 0 (0 to 0)  | 0 (0 to 0) | 0.6% (-3.7% to 4.8%)      |
| 23 | Sudan     | Other unintentional injuries                    | 1 (0 to 1)  | 1 (0 to 1) | -22.6% (-26.3% to -18.3%) |
| 24 | Sudan     | Pedestrian road injuries                        | 1 (0 to 1)  | 1 (0 to 1) | -21.7% (-27.4% to -15.4%) |
| 25 | Sudan     | Physical violence by firearm                    | 0 (0 to 0)  | 0 (0 to 0) | 176.5% (132.2% to 245.9%) |
| 26 | Sudan     | Physical violence by other means                | 0 (0 to 0)  | 0 (0 to 0) | 73.8% (55.5% to 99%)      |
| 27 | Sudan     | Physical violence by sharp object               | 0 (0 to 0)  | 0 (0 to 0) | 54.7% (31% to 85.7%)      |
| 28 | Sudan     | Poisoning by carbon monoxide                    | 0 (0 to 0)  | 0 (0 to 0) | 18.6% (2.8% to 36.9%)     |
| 29 | Sudan     | Poisoning by other means                        | 0 (0 to 0)  | 0 (0 to 0) | -31.7% (-38.5% to -24.5%) |
| 30 | Sudan     | Pulmonary aspiration and foreign body in airway | 0 (0 to 0)  | 0 (0 to 0) | -27.7% (-35.7% to -20.1%) |
| 31 | Sudan     | Self-harm by firearm                            | 0 (0 to 0)  | 0 (0 to 0) | 27.6% (15.5% to 43%)      |
| 32 | Sudan     | Self-harm by other specified means              | 0 (0 to 0)  | 0 (0 to 0) | -1.1% (-6.8% to 5.6%)     |
| 33 | Sudan     | Unintentional firearm injuries                  | 0 (0 to 0)  | 0 (0 to 0) | -13.8% (-21.8% to -6.1%)  |
| 34 | Sudan     | Venomous animal contact                         | 0 (0 to 0)  | 0 (0 to 0) | -14.1% (-20.7% to -7.4%)  |
| 35 | Suriname  | Adverse effects of medical treatment            | 0 (0 to 0)  | 0 (0 to 0) | 0% (0% to 0%)             |
| 36 | Suriname  | Conflict and terrorism                          | 0 (0 to 0)  | 0 (0 to 0) | NA                        |
| 37 | Suriname  | Cyclist road injuries                           | 0 (0 to 1)  | 0 (0 to 0) | -20.3% (-29% to -10.1%)   |
| 38 | Suriname  | Drowning                                        | 0 (0 to 0)  | 0 (0 to 0) | 13.9% (3.2% to 27.6%)     |
| 39 | Suriname  | Environmental heat and cold exposure            | 0 (0 to 1)  | 0 (0 to 1) | 6.6% (2.3% to 10.2%)      |
| 40 | Suriname  | Executions and police conflict                  | 0 (0 to 0)  | 0 (0 to 0) | NA                        |
| 41 | Suriname  | Exposure to forces of nature                    | 0 (0 to 0)  | 0 (0 to 0) | NA                        |
| 42 | Suriname  | Falls                                           | 1 (1 to 1)  | 1 (1 to 2) | 47.1% (41.7% to 53%)      |
| 43 | Suriname  | Fire, heat, and hot substances                  | 0 (0 to 0)  | 0 (0 to 0) | -10% (-15.6% to -4.7%)    |
| 44 | Suriname  | Foreign body in eyes                            | 0 (0 to 0)  | 0 (0 to 0) | 0% (0% to 0%)             |
| 45 |           |                                                 |             |            |                           |
| 46 |           |                                                 |             |            |                           |

|    |          |                                                 |               |               |                           |
|----|----------|-------------------------------------------------|---------------|---------------|---------------------------|
| 1  |          |                                                 |               |               |                           |
| 2  | Suriname | Foreign body in other body part                 | 0 (0 to 0)    | 0 (0 to 0)    | 9.3% (3.7% to 14.8%)      |
| 3  | Suriname | Motor vehicle road injuries                     | 1 (0 to 1)    | 1 (0 to 1)    | -9.7% (-18.2% to -0.4%)   |
| 4  | Suriname | Motorcyclist road injuries                      | 0 (0 to 0)    | 0 (0 to 1)    | 31.5% (15% to 50%)        |
| 5  | Suriname | Non-venomous animal contact                     | 0 (0 to 0)    | 0 (0 to 0)    | 21.8% (11.1% to 33.1%)    |
| 6  | Suriname | Other exposure to mechanical forces             | 0 (0 to 0)    | 0 (0 to 1)    | 16.7% (8.9% to 24.8%)     |
| 7  | Suriname | Other road injuries                             | 0 (0 to 0)    | 0 (0 to 0)    | -1.3% (-12% to 10%)       |
| 8  | Suriname | Other transport injuries                        | 0 (0 to 0)    | 0 (0 to 0)    | 17.2% (11.5% to 23.8%)    |
| 9  | Suriname | Other unintentional injuries                    | 0 (0 to 0)    | 0 (0 to 0)    | 1.9% (-2.8% to 6.1%)      |
| 10 | Suriname | Pedestrian road injuries                        | 0 (0 to 0)    | 0 (0 to 0)    | -21.4% (-29.3% to -13.1%) |
| 11 | Suriname | Physical violence by firearm                    | 0 (0 to 0)    | 0 (0 to 0)    | 69.1% (51.9% to 90.5%)    |
| 12 | Suriname | Physical violence by other means                | 0 (0 to 0)    | 0 (0 to 0)    | 10.5% (1.4% to 20%)       |
| 13 | Suriname | Physical violence by sharp object               | 0 (0 to 0)    | 0 (0 to 0)    | 6.7% (-4.7% to 16.5%)     |
| 14 | Suriname | Poisoning by carbon monoxide                    | 0 (0 to 0)    | 0 (0 to 0)    | 28.2% (12.7% to 45.8%)    |
| 15 | Suriname | Poisoning by other means                        | 0 (0 to 0)    | 0 (0 to 0)    | -13.2% (-22.9% to -3%)    |
| 16 | Suriname | Pulmonary aspiration and foreign body in airway | 0 (0 to 0)    | 0 (0 to 0)    | -24.6% (-32.4% to -14.5%) |
| 17 | Suriname | Self-harm by firearm                            | 0 (0 to 0)    | 0 (0 to 0)    | 14.2% (-1.4% to 29.9%)    |
| 18 | Suriname | Self-harm by other specified means              | 0 (0 to 0)    | 0 (0 to 0)    | -2.3% (-9.3% to 4.7%)     |
| 19 | Suriname | Unintentional firearm injuries                  | 0 (0 to 0)    | 0 (0 to 0)    | 12% (2.3% to 21.1%)       |
| 20 | Sweden   | Venomous animal contact                         | 0 (0 to 0)    | 0 (0 to 0)    | 41.3% (28.4% to 57.8%)    |
| 21 | Sweden   | Adverse effects of medical treatment            | 0 (0 to 0)    | 0 (0 to 0)    | 0% (0% to 0%)             |
| 22 | Sweden   | Conflict and terrorism                          | 0 (0 to 0)    | 0 (0 to 0)    | NA                        |
| 23 | Sweden   | Cyclist road injuries                           | 1 (0 to 1)    | 0 (0 to 1)    | -37.8% (-42.1% to -32.9%) |
| 24 | Sweden   | Drowning                                        | 0 (0 to 0)    | 0 (0 to 0)    | -4.6% (-10.3% to 1.6%)    |
| 25 | Sweden   | Environmental heat and cold exposure            | 0 (0 to 0)    | 0 (0 to 0)    | -13% (-17.2% to -9.5%)    |
| 26 | Sweden   | Executions and police conflict                  | 0 (0 to 0)    | 0 (0 to 0)    | NA                        |
| 27 | Sweden   | Exposure to forces of nature                    | 0 (0 to 0)    | 0 (0 to 0)    | NA                        |
| 28 | Sweden   | Falls                                           | 17 (11 to 27) | 19 (12 to 29) | 10.2% (6.3% to 14.3%)     |
| 29 | Sweden   | Fire, heat, and hot substances                  | 0 (0 to 0)    | 0 (0 to 0)    | -22.2% (-25.9% to -18.4%) |
| 30 | Sweden   | Foreign body in eyes                            | 0 (0 to 0)    | 0 (0 to 0)    | 0% (0% to 0%)             |
| 31 | Sweden   | Foreign body in other body part                 | 1 (0 to 1)    | 1 (0 to 1)    | 0.6% (-2.5% to 3.5%)      |
| 32 | Sweden   | Motor vehicle road injuries                     | 1 (0 to 2)    | 0 (0 to 1)    | -52.3% (-56.1% to -48.5%) |
| 33 | Sweden   | Motorcyclist road injuries                      | 0 (0 to 1)    | 0 (0 to 1)    | -18.4% (-25.1% to -10.4%) |
| 34 | Sweden   | Non-venomous animal contact                     | 0 (0 to 0)    | 0 (0 to 0)    | -10.1% (-13% to -7.3%)    |
| 35 | Sweden   | Other exposure to mechanical forces             | 1 (0 to 2)    | 1 (0 to 1)    | -13.3% (-17.6% to -9.6%)  |
| 36 | Sweden   | Other road injuries                             | 0 (0 to 0)    | 0 (0 to 0)    | -16.9% (-23.4% to -9%)    |
| 37 | Sweden   | Other transport injuries                        | 0 (0 to 1)    | 0 (0 to 1)    | -26.2% (-29.5% to -22.2%) |
| 38 | Sweden   | Other unintentional injuries                    | 1 (1 to 1)    | 1 (1 to 1)    | -2.1% (-5.3% to 1.2%)     |
| 39 | Sweden   | Pedestrian road injuries                        | 0 (0 to 1)    | 0 (0 to 0)    | -28.5% (-34.4% to -22.2%) |
| 40 | Sweden   | Physical violence by firearm                    | 0 (0 to 0)    | 0 (0 to 0)    | 30.9% (19.9% to 43.4%)    |
| 41 | Sweden   | Physical violence by other means                | 0 (0 to 1)    | 0 (0 to 1)    | 2.6% (-2% to 7%)          |
| 42 | Sweden   | Physical violence by sharp object               | 0 (0 to 0)    | 0 (0 to 0)    | -4.6% (-11.5% to 2.1%)    |
| 43 | Sweden   | Poisoning by carbon monoxide                    | 0 (0 to 0)    | 0 (0 to 0)    | 16.2% (7.7% to 25.3%)     |
| 44 | Sweden   | Poisoning by other means                        | 0 (0 to 0)    | 0 (0 to 0)    | -32.3% (-37.8% to -27.7%) |
| 45 |          |                                                 |               |               |                           |
| 46 |          |                                                 |               |               |                           |

|    |                      |                                                 |              |              |                           |
|----|----------------------|-------------------------------------------------|--------------|--------------|---------------------------|
| 1  |                      |                                                 |              |              |                           |
| 2  | Sweden               | Pulmonary aspiration and foreign body in airway | 0 (0 to 0)   | 0 (0 to 0)   | -15.5% (-21.4% to -9.3%)  |
| 3  | Sweden               | Self-harm by firearm                            | 0 (0 to 0)   | 0 (0 to 0)   | -29.7% (-36.9% to -23.1%) |
| 4  | Sweden               | Self-harm by other specified means              | 0 (0 to 0)   | 0 (0 to 0)   | -27.1% (-30.2% to -23.6%) |
| 5  | Sweden               | Unintentional firearm injuries                  | 0 (0 to 0)   | 0 (0 to 0)   | 3% (-3.5% to 10.1%)       |
| 6  | Sweden               | Venomous animal contact                         | 0 (0 to 0)   | 0 (0 to 0)   | -9.2% (-14% to -4.2%)     |
| 7  | Switzerland          | Adverse effects of medical treatment            | 0 (0 to 0)   | 0 (0 to 0)   | 0% (0% to 0%)             |
| 8  | Switzerland          | Conflict and terrorism                          | 0 (0 to 0)   | 0 (0 to 0)   | NA                        |
| 9  | Switzerland          | Cyclist road injuries                           | 0 (0 to 1)   | 0 (0 to 0)   | -35.5% (-43.8% to -26.2%) |
| 10 | Switzerland          | Drowning                                        | 0 (0 to 0)   | 0 (0 to 0)   | 34.1% (20.5% to 45.8%)    |
| 11 | Switzerland          | Environmental heat and cold exposure            | 0 (0 to 0)   | 0 (0 to 0)   | 1.8% (-2.5% to 6.5%)      |
| 12 | Switzerland          | Executions and police conflict                  | 0 (0 to 0)   | 0 (0 to 0)   | NA                        |
| 13 | Switzerland          | Exposure to forces of nature                    | 0 (0 to 0)   | 0 (0 to 0)   | NA                        |
| 14 | Switzerland          | Falls                                           | 10 (7 to 13) | 9 (6 to 12)  | -11% (-15.1% to -6.8%)    |
| 15 | Switzerland          | Fire, heat, and hot substances                  | 0 (0 to 0)   | 0 (0 to 0)   | 2.1% (-2.7% to 6.2%)      |
| 16 | Switzerland          | Foreign body in eyes                            | 0 (0 to 0)   | 0 (0 to 0)   | 0% (0% to 0%)             |
| 17 | Switzerland          | Foreign body in other body part                 | 0 (0 to 0)   | 0 (0 to 0)   | 5.2% (1.5% to 8.6%)       |
| 18 | Switzerland          | Motor vehicle road injuries                     | 1 (0 to 1)   | 0 (0 to 1)   | -47.6% (-54.5% to -39.9%) |
| 19 | Switzerland          | Motorcyclist road injuries                      | 0 (0 to 0)   | 0 (0 to 0)   | -48.7% (-57.3% to -39.1%) |
| 20 | Switzerland          | Non-venomous animal contact                     | 0 (0 to 0)   | 0 (0 to 0)   | 3.7% (-0.5% to 8.2%)      |
| 21 | Switzerland          | Other exposure to mechanical forces             | 1 (0 to 2)   | 1 (0 to 1)   | -31% (-39.7% to -23.6%)   |
| 22 | Switzerland          | Other road injuries                             | 0 (0 to 0)   | 0 (0 to 0)   | -22.5% (-33.1% to -10.8%) |
| 23 | Switzerland          | Other transport injuries                        | 0 (0 to 0)   | 0 (0 to 0)   | -33% (-39% to -26.4%)     |
| 24 | Switzerland          | Other unintentional injuries                    | 0 (0 to 1)   | 0 (0 to 0)   | -49.2% (-55.6% to -42.1%) |
| 25 | Switzerland          | Pedestrian road injuries                        | 0 (0 to 0)   | 0 (0 to 0)   | -44.9% (-54.1% to -34.2%) |
| 26 | Switzerland          | Physical violence by firearm                    | 0 (0 to 0)   | 0 (0 to 0)   | 9.5% (-2.3% to 24%)       |
| 27 | Switzerland          | Physical violence by other means                | 0 (0 to 0)   | 0 (0 to 0)   | -20% (-27.4% to -12.5%)   |
| 28 | Switzerland          | Physical violence by sharp object               | 0 (0 to 0)   | 0 (0 to 0)   | -23.1% (-32.9% to -13.5%) |
| 29 | Switzerland          | Poisoning by carbon monoxide                    | 0 (0 to 0)   | 0 (0 to 0)   | 17.6% (8.6% to 26.2%)     |
| 30 | Switzerland          | Poisoning by other means                        | 0 (0 to 0)   | 0 (0 to 0)   | 6% (-0.9% to 13%)         |
| 31 | Switzerland          | Pulmonary aspiration and foreign body in airway | 0 (0 to 0)   | 0 (0 to 0)   | 1.5% (-6.4% to 10.9%)     |
| 32 | Switzerland          | Self-harm by firearm                            | 0 (0 to 0)   | 0 (0 to 0)   | -65.1% (-71.9% to -58.7%) |
| 33 | Switzerland          | Self-harm by other specified means              | 1 (0 to 1)   | 0 (0 to 1)   | -47% (-50.2% to -43%)     |
| 34 | Switzerland          | Unintentional firearm injuries                  | 0 (0 to 0)   | 0 (0 to 0)   | -24.1% (-34.9% to -14.4%) |
| 35 | Switzerland          | Venomous animal contact                         | 0 (0 to 0)   | 0 (0 to 0)   | -2.4% (-8.3% to 4.1%)     |
| 36 | Syrian Arab Republic | Adverse effects of medical treatment            | 0 (0 to 0)   | 0 (0 to 0)   | 0% (0% to 0%)             |
| 37 | Syrian Arab Republic | Conflict and terrorism                          | 0 (0 to 1)   | 21 (4 to 64) | NA                        |
| 38 | Syrian Arab Republic | Cyclist road injuries                           | 0 (0 to 0)   | 0 (0 to 0)   | -4% (-11.5% to 4%)        |
| 39 | Syrian Arab Republic | Drowning                                        | 0 (0 to 0)   | 0 (0 to 0)   | 120.8% (82.8% to 163.1%)  |
| 40 | Syrian Arab Republic | Environmental heat and cold exposure            | 0 (0 to 0)   | 0 (0 to 0)   | -6.5% (-11.6% to -1.4%)   |
| 41 | Syrian Arab Republic | Executions and police conflict                  | 0 (0 to 0)   | 1 (0 to 1)   | NA                        |
| 42 | Syrian Arab Republic | Exposure to forces of nature                    | 0 (0 to 0)   | 0 (0 to 0)   | NA                        |
| 43 | Syrian Arab Republic | Falls                                           | 2 (1 to 2)   | 2 (2 to 3)   | 47.8% (41.4% to 54.7%)    |
| 44 | Syrian Arab Republic | Fire, heat, and hot substances                  | 0 (0 to 0)   | 0 (0 to 0)   | -11.7% (-21.5% to -1.8%)  |
| 45 |                      |                                                 |              |              |                           |
| 46 |                      |                                                 |              |              |                           |

|    |                            |                                                 |            |            |                           |
|----|----------------------------|-------------------------------------------------|------------|------------|---------------------------|
| 1  |                            |                                                 |            |            |                           |
| 2  | Syrian Arab Republic       | Foreign body in eyes                            | 0 (0 to 0) | 0 (0 to 0) | 0% (0% to 0%)             |
| 3  | Syrian Arab Republic       | Foreign body in other body part                 | 0 (0 to 0) | 0 (0 to 0) | -4.2% (-7.6% to -0.7%)    |
| 4  | Syrian Arab Republic       | Motor vehicle road injuries                     | 0 (0 to 1) | 0 (0 to 1) | -19.6% (-25.3% to -13.2%) |
| 5  | Syrian Arab Republic       | Motorcyclist road injuries                      | 0 (0 to 0) | 0 (0 to 0) | -9.3% (-17.6% to -0.3%)   |
| 6  | Syrian Arab Republic       | Non-venomous animal contact                     | 0 (0 to 0) | 0 (0 to 0) | 4.7% (0.1% to 8.5%)       |
| 7  | Syrian Arab Republic       | Other exposure to mechanical forces             | 0 (0 to 0) | 0 (0 to 0) | -6.8% (-17.8% to 2.4%)    |
| 8  | Syrian Arab Republic       | Other road injuries                             | 0 (0 to 0) | 0 (0 to 0) | -2.6% (-11.2% to 6.5%)    |
| 9  | Syrian Arab Republic       | Other transport injuries                        | 0 (0 to 0) | 0 (0 to 0) | -4.1% (-7.7% to -0.3%)    |
| 10 | Syrian Arab Republic       | Other unintentional injuries                    | 0 (0 to 0) | 0 (0 to 0) | -6.2% (-14% to 1.9%)      |
| 11 | Syrian Arab Republic       | Pedestrian road injuries                        | 0 (0 to 0) | 0 (0 to 0) | -29.9% (-35.6% to -23.9%) |
| 12 | Syrian Arab Republic       | Physical violence by firearm                    | 0 (0 to 0) | 0 (0 to 0) | 129.3% (98.8% to 171.1%)  |
| 13 | Syrian Arab Republic       | Physical violence by other means                | 0 (0 to 0) | 0 (0 to 0) | 6.6% (-3.3% to 15.9%)     |
| 14 | Syrian Arab Republic       | Physical violence by sharp object               | 0 (0 to 0) | 0 (0 to 0) | -6.6% (-18.2% to 4.1%)    |
| 15 | Syrian Arab Republic       | Poisoning by carbon monoxide                    | 0 (0 to 0) | 0 (0 to 0) | 42.4% (29.4% to 57.4%)    |
| 16 | Syrian Arab Republic       | Poisoning by other means                        | 0 (0 to 0) | 0 (0 to 0) | -10.5% (-17.9% to -1.6%)  |
| 17 | Syrian Arab Republic       | Pulmonary aspiration and foreign body in airway | 0 (0 to 0) | 0 (0 to 0) | -20.5% (-29.2% to -12.5%) |
| 18 | Syrian Arab Republic       | Self-harm by firearm                            | 0 (0 to 0) | 0 (0 to 0) | 39.7% (26.8% to 53.7%)    |
| 19 | Syrian Arab Republic       | Self-harm by other specified means              | 0 (0 to 0) | 0 (0 to 0) | 18% (9.9% to 25.3%)       |
| 20 | Syrian Arab Republic       | Unintentional firearm injuries                  | 0 (0 to 0) | 0 (0 to 0) | -6.3% (-18.3% to 5.1%)    |
| 21 | Syrian Arab Republic       | Venomous animal contact                         | 0 (0 to 0) | 0 (0 to 0) | 7% (-0.8% to 14.8%)       |
| 22 | Taiwan (Province of China) | Adverse effects of medical treatment            | 0 (0 to 0) | 0 (0 to 0) | 0% (0% to 0%)             |
| 23 | Taiwan (Province of China) | Conflict and terrorism                          | 0 (0 to 0) | 0 (0 to 0) | NA                        |
| 24 | Taiwan (Province of China) | Cyclist road injuries                           | 0 (0 to 0) | 0 (0 to 0) | 51.8% (21.8% to 95%)      |
| 25 | Taiwan (Province of China) | Drowning                                        | 0 (0 to 0) | 0 (0 to 0) | 12.4% (-2.5% to 34.4%)    |
| 26 | Taiwan (Province of China) | Environmental heat and cold exposure            | 0 (0 to 0) | 0 (0 to 0) | 5.3% (-0.9% to 12%)       |
| 27 | Taiwan (Province of China) | Executions and police conflict                  | 0 (0 to 0) | 0 (0 to 0) | NA                        |
| 28 | Taiwan (Province of China) | Exposure to forces of nature                    | 0 (0 to 0) | 0 (0 to 0) | NA                        |
| 29 | Taiwan (Province of China) | Falls                                           | 2 (2 to 3) | 2 (1 to 2) | -32.6% (-35.9% to -29.5%) |
| 30 | Taiwan (Province of China) | Fire, heat, and hot substances                  | 0 (0 to 0) | 0 (0 to 0) | -40.6% (-48.6% to -33.1%) |
| 31 | Taiwan (Province of China) | Foreign body in eyes                            | 0 (0 to 0) | 0 (0 to 0) | 0% (0% to 0%)             |
| 32 | Taiwan (Province of China) | Foreign body in other body part                 | 0 (0 to 0) | 0 (0 to 0) | 2% (-1.8% to 6%)          |
| 33 | Taiwan (Province of China) | Motor vehicle road injuries                     | 1 (0 to 1) | 0 (0 to 0) | -66.8% (-73.4% to -59%)   |
| 34 | Taiwan (Province of China) | Motorcyclist road injuries                      | 0 (0 to 1) | 0 (0 to 1) | 61.2% (33.4% to 103.2%)   |
| 35 | Taiwan (Province of China) | Non-venomous animal contact                     | 0 (0 to 0) | 0 (0 to 0) | -23.4% (-26.8% to -19.7%) |
| 36 | Taiwan (Province of China) | Other exposure to mechanical forces             | 0 (0 to 0) | 0 (0 to 0) | 51.9% (37% to 69.4%)      |
| 37 | Taiwan (Province of China) | Other road injuries                             | 0 (0 to 0) | 0 (0 to 0) | 119.8% (70.9% to 185.4%)  |
| 38 | Taiwan (Province of China) | Other transport injuries                        | 0 (0 to 0) | 0 (0 to 0) | 7.5% (2.4% to 12.8%)      |
| 39 | Taiwan (Province of China) | Other unintentional injuries                    | 0 (0 to 0) | 0 (0 to 0) | -75.5% (-79.8% to -70.8%) |
| 40 | Taiwan (Province of China) | Pedestrian road injuries                        | 0 (0 to 0) | 0 (0 to 0) | -13.9% (-28.8% to 3.7%)   |
| 41 | Taiwan (Province of China) | Physical violence by firearm                    | 0 (0 to 0) | 0 (0 to 0) | 35.2% (16.6% to 54.5%)    |
| 42 | Taiwan (Province of China) | Physical violence by other means                | 0 (0 to 0) | 0 (0 to 0) | -13.4% (-25.5% to -0.4%)  |
| 43 | Taiwan (Province of China) | Physical violence by sharp object               | 0 (0 to 0) | 0 (0 to 0) | -51.6% (-62.2% to -40.7%) |
| 44 | Taiwan (Province of China) | Poisoning by carbon monoxide                    | 0 (0 to 0) | 0 (0 to 0) | 69% (44.2% to 99.8%)      |
| 45 |                            |                                                 |            |            |                           |
| 46 |                            |                                                 |            |            |                           |

|    |                            |                                                 |            |            |                           |
|----|----------------------------|-------------------------------------------------|------------|------------|---------------------------|
| 1  |                            |                                                 |            |            |                           |
| 2  | Taiwan (Province of China) | Poisoning by other means                        | 0 (0 to 0) | 0 (0 to 0) | -45.3% (-57.9% to -30.5%) |
| 3  | Taiwan (Province of China) | Pulmonary aspiration and foreign body in airway | 0 (0 to 0) | 0 (0 to 0) | -17.4% (-29.5% to -3.2%)  |
| 4  | Taiwan (Province of China) | Self-harm by firearm                            | 0 (0 to 0) | 0 (0 to 0) | 32.6% (16.5% to 49.6%)    |
| 5  | Taiwan (Province of China) | Self-harm by other specified means              | 0 (0 to 0) | 0 (0 to 0) | 38% (29.2% to 48.4%)      |
| 6  | Taiwan (Province of China) | Unintentional firearm injuries                  | 0 (0 to 0) | 0 (0 to 0) | 14.8% (2.4% to 26.7%)     |
| 7  | Taiwan (Province of China) | Venomous animal contact                         | 0 (0 to 0) | 0 (0 to 0) | -25.1% (-30.5% to -19.7%) |
| 8  | Tajikistan                 | Adverse effects of medical treatment            | 0 (0 to 0) | 0 (0 to 0) | 0% (0% to 0%)             |
| 9  | Tajikistan                 | Conflict and terrorism                          | 0 (0 to 0) | 0 (0 to 0) | NA                        |
| 10 | Tajikistan                 | Cyclist road injuries                           | 0 (0 to 0) | 0 (0 to 0) | -18.1% (-24.9% to -11%)   |
| 11 | Tajikistan                 | Drowning                                        | 0 (0 to 0) | 0 (0 to 0) | -6% (-15.8% to 2.8%)      |
| 12 | Tajikistan                 | Environmental heat and cold exposure            | 0 (0 to 0) | 0 (0 to 0) | 1.4% (-3.6% to 6.7%)      |
| 13 | Tajikistan                 | Executions and police conflict                  | 0 (0 to 0) | 0 (0 to 0) | NA                        |
| 14 | Tajikistan                 | Exposure to forces of nature                    | 0 (0 to 1) | 0 (0 to 0) | NA                        |
| 15 | Tajikistan                 | Falls                                           | 3 (2 to 4) | 2 (2 to 3) | -20.6% (-24.8% to -16.4%) |
| 16 | Tajikistan                 | Fire, heat, and hot substances                  | 0 (0 to 0) | 0 (0 to 0) | -34.7% (-39.7% to -30.2%) |
| 17 | Tajikistan                 | Foreign body in eyes                            | 0 (0 to 0) | 0 (0 to 0) | 0% (0% to 0%)             |
| 18 | Tajikistan                 | Foreign body in other body part                 | 0 (0 to 0) | 0 (0 to 0) | 1.4% (-3% to 5.7%)        |
| 19 | Tajikistan                 | Motor vehicle road injuries                     | 1 (0 to 1) | 1 (0 to 1) | -25.9% (-31% to -21%)     |
| 20 | Tajikistan                 | Motorcyclist road injuries                      | 0 (0 to 0) | 0 (0 to 0) | -45.4% (-51.8% to -38.8%) |
| 21 | Tajikistan                 | Non-venomous animal contact                     | 0 (0 to 0) | 0 (0 to 0) | 12.9% (8.5% to 17.6%)     |
| 22 | Tajikistan                 | Other exposure to mechanical forces             | 1 (0 to 1) | 1 (0 to 1) | 3.8% (-1.5% to 8.9%)      |
| 23 | Tajikistan                 | Other road injuries                             | 0 (0 to 0) | 0 (0 to 0) | -19% (-26.4% to -11%)     |
| 24 | Tajikistan                 | Other transport injuries                        | 0 (0 to 0) | 0 (0 to 0) | -1.8% (-6.3% to 2.8%)     |
| 25 | Tajikistan                 | Other unintentional injuries                    | 0 (0 to 0) | 0 (0 to 0) | -7% (-12.7% to -2.4%)     |
| 26 | Tajikistan                 | Pedestrian road injuries                        | 0 (0 to 0) | 0 (0 to 0) | -18.9% (-25.5% to -11.6%) |
| 27 | Tajikistan                 | Physical violence by firearm                    | 0 (0 to 0) | 0 (0 to 0) | -10.1% (-27% to 9.4%)     |
| 28 | Tajikistan                 | Physical violence by other means                | 0 (0 to 1) | 0 (0 to 0) | -57.6% (-62.8% to -52.1%) |
| 29 | Tajikistan                 | Physical violence by sharp object               | 0 (0 to 0) | 0 (0 to 0) | -55.1% (-61.4% to -47.9%) |
| 30 | Tajikistan                 | Poisoning by carbon monoxide                    | 0 (0 to 0) | 0 (0 to 0) | -7.9% (-27.7% to 13.5%)   |
| 31 | Tajikistan                 | Poisoning by other means                        | 0 (0 to 0) | 0 (0 to 0) | -11.6% (-23.7% to 0.1%)   |
| 32 | Tajikistan                 | Pulmonary aspiration and foreign body in airway | 0 (0 to 0) | 0 (0 to 0) | -0.6% (-8.7% to 7.6%)     |
| 33 | Tajikistan                 | Self-harm by firearm                            | 0 (0 to 0) | 0 (0 to 0) | 3.3% (-11.3% to 20.6%)    |
| 34 | Tajikistan                 | Self-harm by other specified means              | 0 (0 to 0) | 0 (0 to 0) | -5.8% (-10.5% to -0.9%)   |
| 35 | Tajikistan                 | Unintentional firearm injuries                  | 0 (0 to 0) | 0 (0 to 0) | -5.7% (-13% to 1.5%)      |
| 36 | Tajikistan                 | Venomous animal contact                         | 0 (0 to 0) | 0 (0 to 0) | 12.2% (6.2% to 19%)       |
| 37 | Thailand                   | Adverse effects of medical treatment            | 0 (0 to 0) | 0 (0 to 0) | 0% (0% to 0%)             |
| 38 | Thailand                   | Conflict and terrorism                          | 0 (0 to 0) | 0 (0 to 0) | NA                        |
| 39 | Thailand                   | Cyclist road injuries                           | 0 (0 to 0) | 0 (0 to 0) | -20.2% (-28.7% to -10.2%) |
| 40 | Thailand                   | Drowning                                        | 0 (0 to 0) | 0 (0 to 0) | 22.8% (10.2% to 36.4%)    |
| 41 | Thailand                   | Environmental heat and cold exposure            | 0 (0 to 0) | 0 (0 to 0) | 2.9% (-1.7% to 8.3%)      |
| 42 | Thailand                   | Executions and police conflict                  | 0 (0 to 0) | 0 (0 to 0) | NA                        |
| 43 | Thailand                   | Exposure to forces of nature                    | 0 (0 to 0) | 0 (0 to 0) | NA                        |
| 44 | Thailand                   | Falls                                           | 2 (1 to 2) | 2 (2 to 3) | 33.8% (28.4% to 39.5%)    |
| 45 |                            |                                                 |            |            |                           |
| 46 |                            |                                                 |            |            |                           |

|    |             |                                                 |              |            |                           |
|----|-------------|-------------------------------------------------|--------------|------------|---------------------------|
| 1  |             |                                                 |              |            |                           |
| 2  | Thailand    | Fire, heat, and hot substances                  | 0 (0 to 0)   | 0 (0 to 0) | -6.3% (-11.3% to -1.3%)   |
| 3  | Thailand    | Foreign body in eyes                            | 0 (0 to 0)   | 0 (0 to 0) | 0% (0% to 0%)             |
| 4  | Thailand    | Foreign body in other body part                 | 0 (0 to 0)   | 0 (0 to 0) | 3.6% (-2.3% to 9.1%)      |
| 5  | Thailand    | Motor vehicle road injuries                     | 1 (0 to 1)   | 0 (0 to 1) | -26.4% (-33.8% to -18.4%) |
| 6  | Thailand    | Motorcyclist road injuries                      | 1 (1 to 2)   | 1 (0 to 1) | -23.2% (-30% to -15.2%)   |
| 7  | Thailand    | Non-venomous animal contact                     | 0 (0 to 0)   | 0 (0 to 0) | -29.8% (-34.6% to -24.3%) |
| 8  | Thailand    | Other exposure to mechanical forces             | 0 (0 to 0)   | 0 (0 to 0) | -31.2% (-37.8% to -25.1%) |
| 9  | Thailand    | Other road injuries                             | 0 (0 to 0)   | 0 (0 to 0) | -35.2% (-44.7% to -25.1%) |
| 10 | Thailand    | Other transport injuries                        | 0 (0 to 0)   | 0 (0 to 0) | -20.7% (-25.4% to -16.4%) |
| 11 | Thailand    | Other unintentional injuries                    | 0 (0 to 0)   | 0 (0 to 0) | -19.8% (-26% to -13.1%)   |
| 12 | Thailand    | Pedestrian road injuries                        | 0 (0 to 0)   | 0 (0 to 0) | -56.3% (-60.7% to -51.4%) |
| 13 | Thailand    | Physical violence by firearm                    | 0 (0 to 0)   | 0 (0 to 0) | -34.5% (-42.4% to -24.4%) |
| 14 | Thailand    | Physical violence by other means                | 0 (0 to 1)   | 0 (0 to 0) | -43.5% (-48% to -38.7%)   |
| 15 | Thailand    | Physical violence by sharp object               | 0 (0 to 0)   | 0 (0 to 0) | -51.4% (-56.7% to -45.5%) |
| 16 | Thailand    | Poisoning by carbon monoxide                    | 0 (0 to 0)   | 0 (0 to 0) | 30% (16.3% to 46.3%)      |
| 17 | Thailand    | Poisoning by other means                        | 0 (0 to 0)   | 0 (0 to 0) | -9.6% (-17.1% to -1.7%)   |
| 18 | Thailand    | Pulmonary aspiration and foreign body in airway | 0 (0 to 0)   | 0 (0 to 0) | -22.6% (-32.4% to -10.4%) |
| 19 | Thailand    | Self-harm by firearm                            | 0 (0 to 0)   | 0 (0 to 0) | -34.7% (-52.9% to -15.2%) |
| 20 | Thailand    | Self-harm by other specified means              | 0 (0 to 1)   | 0 (0 to 0) | -30.9% (-35.9% to -25.1%) |
| 21 | Thailand    | Unintentional firearm injuries                  | 0 (0 to 0)   | 0 (0 to 0) | -24.8% (-31.8% to -17.3%) |
| 22 | Thailand    | Venomous animal contact                         | 0 (0 to 0)   | 0 (0 to 0) | -39.2% (-46.1% to -32.7%) |
| 23 | Timor-Leste | Adverse effects of medical treatment            | 0 (0 to 0)   | 0 (0 to 0) | 0% (0% to 0%)             |
| 24 | Timor-Leste | Conflict and terrorism                          | 14 (3 to 41) | 0 (0 to 0) | NA                        |
| 25 | Timor-Leste | Cyclist road injuries                           | 0 (0 to 0)   | 0 (0 to 0) | -4.4% (-12.9% to 5.6%)    |
| 26 | Timor-Leste | Drowning                                        | 0 (0 to 0)   | 0 (0 to 0) | -23.8% (-29.6% to -17.9%) |
| 27 | Timor-Leste | Environmental heat and cold exposure            | 0 (0 to 0)   | 0 (0 to 0) | -0.8% (-5.6% to 4.3%)     |
| 28 | Timor-Leste | Executions and police conflict                  | 0 (0 to 0)   | 0 (0 to 0) | NA                        |
| 29 | Timor-Leste | Exposure to forces of nature                    | 0 (0 to 0)   | 0 (0 to 0) | NA                        |
| 30 | Timor-Leste | Falls                                           | 1 (1 to 1)   | 1 (1 to 2) | 54% (48.5% to 59.4%)      |
| 31 | Timor-Leste | Fire, heat, and hot substances                  | 0 (0 to 0)   | 0 (0 to 0) | -22.7% (-28.6% to -17.5%) |
| 32 | Timor-Leste | Foreign body in eyes                            | 0 (0 to 0)   | 0 (0 to 0) | 0% (0% to 0%)             |
| 33 | Timor-Leste | Foreign body in other body part                 | 0 (0 to 0)   | 0 (0 to 0) | -8.5% (-11.7% to -4.7%)   |
| 34 | Timor-Leste | Motor vehicle road injuries                     | 0 (0 to 1)   | 0 (0 to 1) | -7.3% (-16.4% to 1.4%)    |
| 35 | Timor-Leste | Motorcyclist road injuries                      | 0 (0 to 1)   | 0 (0 to 1) | 58.1% (42.1% to 78.3%)    |
| 36 | Timor-Leste | Non-venomous animal contact                     | 0 (0 to 0)   | 0 (0 to 0) | -31.5% (-35.9% to -27.4%) |
| 37 | Timor-Leste | Other exposure to mechanical forces             | 0 (0 to 0)   | 0 (0 to 0) | -17.8% (-23.1% to -13%)   |
| 38 | Timor-Leste | Other road injuries                             | 0 (0 to 0)   | 0 (0 to 0) | -2.5% (-13.1% to 9%)      |
| 39 | Timor-Leste | Other transport injuries                        | 0 (0 to 0)   | 0 (0 to 0) | -2.8% (-7.7% to 2%)       |
| 40 | Timor-Leste | Other unintentional injuries                    | 0 (0 to 0)   | 0 (0 to 0) | -22% (-26.8% to -17%)     |
| 41 | Timor-Leste | Pedestrian road injuries                        | 0 (0 to 0)   | 0 (0 to 0) | -18.7% (-26% to -10.9%)   |
| 42 | Timor-Leste | Physical violence by firearm                    | 0 (0 to 0)   | 0 (0 to 0) | 22.7% (9.3% to 37.3%)     |
| 43 | Timor-Leste | Physical violence by other means                | 0 (0 to 0)   | 0 (0 to 0) | -3.7% (-10.5% to 3.5%)    |
| 44 | Timor-Leste | Physical violence by sharp object               | 0 (0 to 0)   | 0 (0 to 0) | -6.3% (-14.4% to 1.8%)    |
| 45 |             |                                                 |              |            |                           |
| 46 |             |                                                 |              |            |                           |

|    |             |                                                 |            |            |                           |
|----|-------------|-------------------------------------------------|------------|------------|---------------------------|
| 1  |             |                                                 |            |            |                           |
| 2  | Timor-Leste | Poisoning by carbon monoxide                    | 0 (0 to 0) | 0 (0 to 0) | 31% (14.3% to 47.9%)      |
| 3  | Timor-Leste | Poisoning by other means                        | 0 (0 to 0) | 0 (0 to 0) | -13.5% (-19.6% to -6%)    |
| 4  | Timor-Leste | Pulmonary aspiration and foreign body in airway | 0 (0 to 0) | 0 (0 to 0) | -26.1% (-34.2% to -17.3%) |
| 5  | Timor-Leste | Self-harm by firearm                            | 0 (0 to 0) | 0 (0 to 0) | 33.5% (12.1% to 57.1%)    |
| 6  | Timor-Leste | Self-harm by other specified means              | 0 (0 to 0) | 0 (0 to 0) | -12.7% (-17.7% to -6%)    |
| 7  | Timor-Leste | Unintentional firearm injuries                  | 0 (0 to 0) | 0 (0 to 0) | -15.8% (-22% to -9.5%)    |
| 8  | Timor-Leste | Venomous animal contact                         | 0 (0 to 0) | 0 (0 to 0) | -40.5% (-48.1% to -33.4%) |
| 9  | Togo        | Adverse effects of medical treatment            | 0 (0 to 0) | 0 (0 to 0) | 0% (0% to 0%)             |
| 10 | Togo        | Conflict and terrorism                          | 0 (0 to 0) | 0 (0 to 0) | NA                        |
| 11 | Togo        | Cyclist road injuries                           | 1 (1 to 2) | 1 (1 to 3) | 14% (6.7% to 22.8%)       |
| 12 | Togo        | Drowning                                        | 0 (0 to 0) | 0 (0 to 0) | -8.4% (-15.2% to -1.6%)   |
| 13 | Togo        | Environmental heat and cold exposure            | 0 (0 to 0) | 0 (0 to 0) | 3.2% (-1.6% to 8.6%)      |
| 14 | Togo        | Executions and police conflict                  | 0 (0 to 0) | 0 (0 to 0) | NA                        |
| 15 | Togo        | Exposure to forces of nature                    | 0 (0 to 0) | 0 (0 to 0) | NA                        |
| 16 | Togo        | Falls                                           | 3 (2 to 4) | 3 (2 to 5) | 10.9% (7.1% to 15.1%)     |
| 17 | Togo        | Fire, heat, and hot substances                  | 0 (0 to 0) | 0 (0 to 0) | -6.2% (-11.6% to -1.2%)   |
| 18 | Togo        | Foreign body in eyes                            | 0 (0 to 0) | 0 (0 to 0) | 0% (0% to 0%)             |
| 19 | Togo        | Foreign body in other body part                 | 1 (0 to 1) | 1 (0 to 1) | 3.4% (-0.2% to 7.2%)      |
| 20 | Togo        | Motor vehicle road injuries                     | 2 (1 to 3) | 2 (1 to 3) | 3.3% (-4.3% to 11.3%)     |
| 21 | Togo        | Motorcyclist road injuries                      | 1 (0 to 1) | 1 (0 to 2) | 20.8% (11.3% to 30.5%)    |
| 22 | Togo        | Non-venomous animal contact                     | 0 (0 to 0) | 0 (0 to 0) | 2.3% (-2% to 6.5%)        |
| 23 | Togo        | Other exposure to mechanical forces             | 0 (0 to 0) | 0 (0 to 0) | -10.4% (-15.5% to -4.6%)  |
| 24 | Togo        | Other road injuries                             | 0 (0 to 0) | 0 (0 to 0) | 2.7% (-6% to 12.2%)       |
| 25 | Togo        | Other transport injuries                        | 0 (0 to 1) | 0 (0 to 1) | -8.3% (-12.4% to -4.5%)   |
| 26 | Togo        | Other unintentional injuries                    | 0 (0 to 0) | 0 (0 to 0) | -8.9% (-14.1% to -2.6%)   |
| 27 | Togo        | Pedestrian road injuries                        | 2 (1 to 4) | 2 (1 to 3) | -8.6% (-14.7% to -2.5%)   |
| 28 | Togo        | Physical violence by firearm                    | 0 (0 to 0) | 0 (0 to 0) | 34.4% (22.1% to 47.9%)    |
| 29 | Togo        | Physical violence by other means                | 0 (0 to 0) | 0 (0 to 0) | 12.1% (5.7% to 18.8%)     |
| 30 | Togo        | Physical violence by sharp object               | 0 (0 to 0) | 0 (0 to 0) | 12% (3.8% to 21%)         |
| 31 | Togo        | Poisoning by carbon monoxide                    | 0 (0 to 0) | 0 (0 to 0) | 12.9% (-0.5% to 28%)      |
| 32 | Togo        | Poisoning by other means                        | 0 (0 to 0) | 0 (0 to 0) | -14.3% (-22.1% to -6%)    |
| 33 | Togo        | Pulmonary aspiration and foreign body in airway | 0 (0 to 0) | 0 (0 to 0) | -1.3% (-10% to 8.3%)      |
| 34 | Togo        | Self-harm by firearm                            | 0 (0 to 0) | 0 (0 to 0) | 19.2% (7.8% to 32.3%)     |
| 35 | Togo        | Self-harm by other specified means              | 0 (0 to 0) | 0 (0 to 0) | 14.2% (9% to 20.2%)       |
| 36 | Togo        | Unintentional firearm injuries                  | 0 (0 to 0) | 0 (0 to 0) | -12.6% (-19.7% to -5%)    |
| 37 | Togo        | Venomous animal contact                         | 0 (0 to 0) | 0 (0 to 0) | 1.3% (-5.1% to 7.9%)      |
| 38 | Tokelau     | Adverse effects of medical treatment            | 0 (0 to 0) | 0 (0 to 0) | 0% (0% to 0%)             |
| 39 | Tokelau     | Conflict and terrorism                          | 0 (0 to 0) | 0 (0 to 0) | NA                        |
| 40 | Tokelau     | Cyclist road injuries                           | 0 (0 to 1) | 0 (0 to 1) | 11.3% (3.7% to 19.1%)     |
| 41 | Tokelau     | Drowning                                        | 0 (0 to 0) | 0 (0 to 0) | 37.8% (22.8% to 53.2%)    |
| 42 | Tokelau     | Environmental heat and cold exposure            | 0 (0 to 0) | 0 (0 to 0) | -2.7% (-7.5% to 2.6%)     |
| 43 | Tokelau     | Executions and police conflict                  | 0 (0 to 0) | 0 (0 to 0) | NA                        |
| 44 | Tokelau     | Exposure to forces of nature                    | 0 (0 to 0) | 0 (0 to 0) | NA                        |
| 45 |             |                                                 |            |            |                           |
| 46 |             |                                                 |            |            |                           |

|    |         |                                                 |            |            |                           |
|----|---------|-------------------------------------------------|------------|------------|---------------------------|
| 1  |         |                                                 |            |            |                           |
| 2  | Tokelau | Falls                                           | 3 (2 to 4) | 5 (3 to 7) | 62.6% (56% to 68.8%)      |
| 3  | Tokelau | Fire, heat, and hot substances                  | 0 (0 to 0) | 0 (0 to 0) | 14.1% (7.6% to 20.8%)     |
| 4  | Tokelau | Foreign body in eyes                            | 0 (0 to 0) | 0 (0 to 0) | 0% (0% to 0%)             |
| 5  | Tokelau | Foreign body in other body part                 | 0 (0 to 0) | 0 (0 to 0) | -0.5% (-4.1% to 3.5%)     |
| 6  | Tokelau | Motor vehicle road injuries                     | 1 (0 to 2) | 1 (0 to 2) | -8.1% (-14.8% to -1.6%)   |
| 7  | Tokelau | Motorcyclist road injuries                      | 1 (0 to 1) | 1 (0 to 1) | 8.4% (0.3% to 16.8%)      |
| 8  | Tokelau | Non-venomous animal contact                     | 0 (0 to 0) | 0 (0 to 0) | -19.9% (-24.1% to -15.5%) |
| 9  | Tokelau | Other exposure to mechanical forces             | 0 (0 to 0) | 0 (0 to 0) | -11.7% (-16.5% to -6.7%)  |
| 10 | Tokelau | Other road injuries                             | 0 (0 to 0) | 0 (0 to 0) | 12.3% (1.6% to 22.9%)     |
| 11 | Tokelau | Other transport injuries                        | 0 (0 to 1) | 0 (0 to 0) | -7.6% (-12.9% to -2.6%)   |
| 12 | Tokelau | Other unintentional injuries                    | 0 (0 to 0) | 0 (0 to 0) | -7.8% (-12% to -3.5%)     |
| 13 | Tokelau | Pedestrian road injuries                        | 1 (0 to 1) | 1 (0 to 1) | -9.5% (-16.1% to -2.3%)   |
| 14 | Tokelau | Physical violence by firearm                    | 0 (0 to 0) | 0 (0 to 0) | 61.1% (40.1% to 85.6%)    |
| 15 | Tokelau | Physical violence by other means                | 1 (0 to 1) | 1 (0 to 1) | 0.8% (-4.6% to 6%)        |
| 16 | Tokelau | Physical violence by sharp object               | 0 (0 to 0) | 0 (0 to 0) | -12.8% (-21.2% to -3.2%)  |
| 17 | Tokelau | Poisoning by carbon monoxide                    | 0 (0 to 0) | 0 (0 to 0) | 18.7% (6.9% to 30.6%)     |
| 18 | Tokelau | Poisoning by other means                        | 0 (0 to 0) | 0 (0 to 0) | -11.1% (-18.7% to -3.4%)  |
| 19 | Tokelau | Pulmonary aspiration and foreign body in airway | 0 (0 to 0) | 0 (0 to 0) | -12.1% (-21.1% to -3.2%)  |
| 20 | Tokelau | Self-harm by firearm                            | 0 (0 to 0) | 0 (0 to 0) | 6.9% (-6.2% to 25.6%)     |
| 21 | Tokelau | Self-harm by other specified means              | 0 (0 to 0) | 0 (0 to 0) | -9.5% (-14.9% to -3.3%)   |
| 22 | Tokelau | Unintentional firearm injuries                  | 0 (0 to 0) | 0 (0 to 0) | -16.3% (-23.8% to -9.3%)  |
| 23 | Tokelau | Venomous animal contact                         | 0 (0 to 0) | 0 (0 to 0) | -16.8% (-22.5% to -9.3%)  |
| 24 | Tonga   | Adverse effects of medical treatment            | 0 (0 to 0) | 0 (0 to 0) | 0% (0% to 0%)             |
| 25 | Tonga   | Conflict and terrorism                          | 0 (0 to 0) | 0 (0 to 0) | NA                        |
| 26 | Tonga   | Cyclist road injuries                           | 0 (0 to 0) | 0 (0 to 0) | 11.9% (3.9% to 20.4%)     |
| 27 | Tonga   | Drowning                                        | 0 (0 to 0) | 0 (0 to 0) | 26.9% (14% to 42%)        |
| 28 | Tonga   | Environmental heat and cold exposure            | 0 (0 to 0) | 0 (0 to 0) | -1.6% (-6.5% to 4%)       |
| 29 | Tonga   | Executions and police conflict                  | 0 (0 to 0) | 0 (0 to 0) | NA                        |
| 30 | Tonga   | Exposure to forces of nature                    | 0 (0 to 1) | 0 (0 to 0) | NA                        |
| 31 | Tonga   | Falls                                           | 1 (1 to 1) | 1 (1 to 2) | 39% (34.1% to 44.8%)      |
| 32 | Tonga   | Fire, heat, and hot substances                  | 0 (0 to 0) | 0 (0 to 0) | -5.1% (-10% to 0.3%)      |
| 33 | Tonga   | Foreign body in eyes                            | 0 (0 to 0) | 0 (0 to 0) | 0% (0% to 0%)             |
| 34 | Tonga   | Foreign body in other body part                 | 0 (0 to 0) | 0 (0 to 0) | -3.3% (-6.4% to 0.4%)     |
| 35 | Tonga   | Motor vehicle road injuries                     | 0 (0 to 1) | 0 (0 to 1) | 1.5% (-5.5% to 8.7%)      |
| 36 | Tonga   | Motorcyclist road injuries                      | 0 (0 to 0) | 0 (0 to 0) | 14.9% (5.8% to 25.4%)     |
| 37 | Tonga   | Non-venomous animal contact                     | 0 (0 to 0) | 0 (0 to 0) | -13.7% (-17.3% to -9.1%)  |
| 38 | Tonga   | Other exposure to mechanical forces             | 0 (0 to 0) | 0 (0 to 0) | -8.4% (-14% to -2.8%)     |
| 39 | Tonga   | Other road injuries                             | 0 (0 to 0) | 0 (0 to 0) | 10.9% (0.5% to 21.4%)     |
| 40 | Tonga   | Other transport injuries                        | 0 (0 to 0) | 0 (0 to 0) | -11.3% (-15.9% to -6.7%)  |
| 41 | Tonga   | Other unintentional injuries                    | 0 (0 to 0) | 0 (0 to 0) | -14.7% (-18.7% to -10.3%) |
| 42 | Tonga   | Pedestrian road injuries                        | 0 (0 to 0) | 0 (0 to 0) | -9.7% (-16.9% to -1.6%)   |
| 43 | Tonga   | Physical violence by firearm                    | 0 (0 to 0) | 0 (0 to 0) | -24.7% (-39.3% to -6.7%)  |
| 44 | Tonga   | Physical violence by other means                | 1 (0 to 1) | 0 (0 to 0) | -51% (-55.3% to -46.3%)   |
| 45 |         |                                                 |            |            |                           |
| 46 |         |                                                 |            |            |                           |



|    |                     |                                                 |            |            |                           |
|----|---------------------|-------------------------------------------------|------------|------------|---------------------------|
| 1  |                     |                                                 |            |            |                           |
| 2  | Tonga               | Physical violence by sharp object               | 0 (0 to 0) | 0 (0 to 0) | -55.6% (-61.9% to -48.8%) |
| 3  | Tonga               | Poisoning by carbon monoxide                    | 0 (0 to 0) | 0 (0 to 0) | 12.5% (3.3% to 24.1%)     |
| 4  | Tonga               | Poisoning by other means                        | 0 (0 to 0) | 0 (0 to 0) | -15.3% (-21.2% to -9.8%)  |
| 5  | Tonga               | Pulmonary aspiration and foreign body in airway | 0 (0 to 0) | 0 (0 to 0) | -0.8% (-9.2% to 8.9%)     |
| 6  | Tonga               | Self-harm by firearm                            | 0 (0 to 0) | 0 (0 to 0) | 23.9% (11.2% to 41.2%)    |
| 7  | Tonga               | Self-harm by other specified means              | 0 (0 to 0) | 0 (0 to 0) | 13.4% (6.3% to 21.7%)     |
| 8  | Tonga               | Unintentional firearm injuries                  | 0 (0 to 0) | 0 (0 to 0) | -4.4% (-9.9% to 0.9%)     |
| 9  | Trinidad and Tobago | Venomous animal contact                         | 0 (0 to 0) | 0 (0 to 0) | -11.5% (-17% to -5.5%)    |
| 10 | Trinidad and Tobago | Adverse effects of medical treatment            | 0 (0 to 0) | 0 (0 to 0) | 0% (0% to 0%)             |
| 11 | Trinidad and Tobago | Conflict and terrorism                          | 1 (0 to 4) | 0 (0 to 0) | NA                        |
| 12 | Trinidad and Tobago | Cyclist road injuries                           | 0 (0 to 0) | 0 (0 to 0) | -10.4% (-21.1% to 1.5%)   |
| 13 | Trinidad and Tobago | Drowning                                        | 0 (0 to 0) | 0 (0 to 0) | 7% (-5.8% to 21.1%)       |
| 14 | Trinidad and Tobago | Environmental heat and cold exposure            | 0 (0 to 1) | 0 (0 to 1) | 6.9% (2.7% to 11.6%)      |
| 15 | Trinidad and Tobago | Executions and police conflict                  | 0 (0 to 0) | 0 (0 to 0) | NA                        |
| 16 | Trinidad and Tobago | Exposure to forces of nature                    | 0 (0 to 0) | 0 (0 to 0) | NA                        |
| 17 | Trinidad and Tobago | Falls                                           | 1 (1 to 2) | 1 (1 to 2) | 4.4% (-1.1% to 9.9%)      |
| 18 | Trinidad and Tobago | Fire, heat, and hot substances                  | 0 (0 to 0) | 0 (0 to 0) | -7.6% (-13.3% to -1.7%)   |
| 19 | Trinidad and Tobago | Foreign body in eyes                            | 0 (0 to 0) | 0 (0 to 0) | 0% (0% to 0%)             |
| 20 | Trinidad and Tobago | Foreign body in other body part                 | 0 (0 to 0) | 0 (0 to 0) | 1.4% (-3% to 5.9%)        |
| 21 | Trinidad and Tobago | Motor vehicle road injuries                     | 0 (0 to 1) | 1 (0 to 1) | 13% (0.3% to 27.8%)       |
| 22 | Trinidad and Tobago | Motorcyclist road injuries                      | 0 (0 to 0) | 0 (0 to 0) | 42.5% (22.7% to 66.4%)    |
| 23 | Trinidad and Tobago | Non-venomous animal contact                     | 0 (0 to 0) | 0 (0 to 0) | -18.1% (-22.6% to -13.2%) |
| 24 | Trinidad and Tobago | Other exposure to mechanical forces             | 0 (0 to 0) | 0 (0 to 0) | 8.4% (-0.3% to 15.9%)     |
| 25 | Trinidad and Tobago | Other road injuries                             | 0 (0 to 0) | 0 (0 to 0) | -8.4% (-20.1% to 4.7%)    |
| 26 | Trinidad and Tobago | Other transport injuries                        | 0 (0 to 0) | 0 (0 to 0) | 0.2% (-4.4% to 5.2%)      |
| 27 | Trinidad and Tobago | Other unintentional injuries                    | 0 (0 to 0) | 0 (0 to 0) | -2.8% (-8.4% to 2.9%)     |
| 28 | Trinidad and Tobago | Pedestrian road injuries                        | 0 (0 to 0) | 0 (0 to 0) | -38.8% (-47% to -30.3%)   |
| 29 | Trinidad and Tobago | Physical violence by firearm                    | 0 (0 to 0) | 0 (0 to 0) | 268.8% (191.5% to 393.1%) |
| 30 | Trinidad and Tobago | Physical violence by other means                | 0 (0 to 0) | 0 (0 to 0) | 36.7% (20.5% to 55.1%)    |
| 31 | Trinidad and Tobago | Physical violence by sharp object               | 0 (0 to 0) | 0 (0 to 0) | 42.9% (19.9% to 70%)      |
| 32 | Trinidad and Tobago | Poisoning by carbon monoxide                    | 0 (0 to 0) | 0 (0 to 0) | 11% (-3.7% to 27.1%)      |
| 33 | Trinidad and Tobago | Poisoning by other means                        | 0 (0 to 0) | 0 (0 to 0) | -0.8% (-9.4% to 9.1%)     |
| 34 | Trinidad and Tobago | Pulmonary aspiration and foreign body in airway | 0 (0 to 0) | 0 (0 to 0) | -19.6% (-27.5% to -10.2%) |
| 35 | Trinidad and Tobago | Self-harm by firearm                            | 0 (0 to 0) | 0 (0 to 0) | 0.5% (-13.1% to 17.8%)    |
| 36 | Trinidad and Tobago | Self-harm by other specified means              | 0 (0 to 0) | 0 (0 to 0) | -31.3% (-38% to -24.3%)   |
| 37 | Trinidad and Tobago | Unintentional firearm injuries                  | 0 (0 to 0) | 0 (0 to 0) | 16.2% (8.2% to 25.6%)     |
| 38 | Trinidad and Tobago | Venomous animal contact                         | 0 (0 to 0) | 0 (0 to 0) | -15% (-19.9% to -9.8%)    |
| 39 | Tunisia             | Adverse effects of medical treatment            | 0 (0 to 0) | 0 (0 to 0) | 0% (0% to 0%)             |
| 40 | Tunisia             | Conflict and terrorism                          | 0 (0 to 0) | 0 (0 to 0) | NA                        |
| 41 | Tunisia             | Cyclist road injuries                           | 0 (0 to 0) | 0 (0 to 0) | 0.6% (-8.1% to 9.8%)      |
| 42 | Tunisia             | Drowning                                        | 0 (0 to 0) | 0 (0 to 0) | 74% (46.9% to 103.2%)     |
| 43 | Tunisia             | Environmental heat and cold exposure            | 0 (0 to 0) | 0 (0 to 0) | 2.9% (-1.6% to 7.8%)      |
| 44 | Tunisia             | Executions and police conflict                  | 0 (0 to 0) | 0 (0 to 0) | NA                        |
| 45 |                     |                                                 |            |            |                           |
| 46 |                     |                                                 |            |            |                           |

|    |         |                                                 |            |            |                           |
|----|---------|-------------------------------------------------|------------|------------|---------------------------|
| 1  |         |                                                 |            |            |                           |
| 2  | Tunisia | Exposure to forces of nature                    | 0 (0 to 0) | 0 (0 to 0) | NA                        |
| 3  | Tunisia | Falls                                           | 1 (1 to 2) | 2 (1 to 3) | 42.2% (36.8% to 47.7%)    |
| 4  | Tunisia | Fire, heat, and hot substances                  | 0 (0 to 0) | 0 (0 to 0) | -14.8% (-22% to -7.9%)    |
| 5  | Tunisia | Foreign body in eyes                            | 0 (0 to 0) | 0 (0 to 0) | 0% (0% to 0%)             |
| 6  | Tunisia | Foreign body in other body part                 | 0 (0 to 0) | 0 (0 to 0) | -0.8% (-4.4% to 2.6%)     |
| 7  | Tunisia | Motor vehicle road injuries                     | 1 (0 to 1) | 1 (0 to 1) | -2.1% (-9.3% to 5.5%)     |
| 8  | Tunisia | Motorcyclist road injuries                      | 0 (0 to 0) | 0 (0 to 0) | -7% (-16.2% to 1.9%)      |
| 9  | Tunisia | Non-venomous animal contact                     | 0 (0 to 0) | 0 (0 to 0) | -7.3% (-11.5% to -3.3%)   |
| 10 | Tunisia | Other exposure to mechanical forces             | 0 (0 to 1) | 0 (0 to 1) | -17.6% (-22.7% to -12.2%) |
| 11 | Tunisia | Other road injuries                             | 0 (0 to 0) | 0 (0 to 0) | 5.5% (-5.2% to 17.3%)     |
| 12 | Tunisia | Other transport injuries                        | 0 (0 to 0) | 0 (0 to 0) | -0.6% (-5.6% to 4%)       |
| 13 | Tunisia | Other unintentional injuries                    | 0 (0 to 0) | 0 (0 to 0) | -4.2% (-9% to 1.7%)       |
| 14 | Tunisia | Pedestrian road injuries                        | 0 (0 to 1) | 0 (0 to 0) | -22.1% (-29.5% to -15%)   |
| 15 | Tunisia | Physical violence by firearm                    | 0 (0 to 0) | 0 (0 to 0) | 104.2% (77.7% to 137.6%)  |
| 16 | Tunisia | Physical violence by other means                | 0 (0 to 0) | 0 (0 to 0) | -4.7% (-13.3% to 2.6%)    |
| 17 | Tunisia | Physical violence by sharp object               | 0 (0 to 0) | 0 (0 to 0) | -7.5% (-17.8% to 1.2%)    |
| 18 | Tunisia | Poisoning by carbon monoxide                    | 0 (0 to 0) | 0 (0 to 0) | 33.7% (17.9% to 51.2%)    |
| 19 | Tunisia | Poisoning by other means                        | 0 (0 to 0) | 0 (0 to 0) | -15.2% (-23.7% to -6.4%)  |
| 20 | Tunisia | Pulmonary aspiration and foreign body in airway | 0 (0 to 0) | 0 (0 to 0) | -12.3% (-19.5% to -4.6%)  |
| 21 | Tunisia | Self-harm by firearm                            | 0 (0 to 0) | 0 (0 to 0) | 34% (22.4% to 48.6%)      |
| 22 | Tunisia | Self-harm by other specified means              | 0 (0 to 0) | 0 (0 to 0) | 10.6% (4.4% to 17.5%)     |
| 23 | Tunisia | Unintentional firearm injuries                  | 0 (0 to 0) | 0 (0 to 0) | -6% (-14.8% to 5.3%)      |
| 24 | Tunisia | Venomous animal contact                         | 0 (0 to 0) | 0 (0 to 0) | -5.7% (-11.9% to 0.5%)    |
| 25 | Turkey  | Adverse effects of medical treatment            | 0 (0 to 0) | 0 (0 to 0) | 0% (0% to 0%)             |
| 26 | Turkey  | Conflict and terrorism                          | 1 (0 to 2) | 0 (0 to 1) | NA                        |
| 27 | Turkey  | Cyclist road injuries                           | 0 (0 to 0) | 0 (0 to 0) | -8.5% (-16.7% to 0.1%)    |
| 28 | Turkey  | Drowning                                        | 0 (0 to 0) | 0 (0 to 0) | 156.9% (121.1% to 194.6%) |
| 29 | Turkey  | Environmental heat and cold exposure            | 0 (0 to 0) | 0 (0 to 0) | 3.5% (-1.9% to 9.8%)      |
| 30 | Turkey  | Executions and police conflict                  | 0 (0 to 0) | 0 (0 to 0) | NA                        |
| 31 | Turkey  | Exposure to forces of nature                    | 0 (0 to 0) | 0 (0 to 0) | NA                        |
| 32 | Turkey  | Falls                                           | 1 (1 to 2) | 3 (2 to 4) | 110.5% (97.3% to 125.4%)  |
| 33 | Turkey  | Fire, heat, and hot substances                  | 0 (0 to 0) | 0 (0 to 0) | -0.6% (-5.4% to 4.6%)     |
| 34 | Turkey  | Foreign body in eyes                            | 0 (0 to 0) | 0 (0 to 0) | 0% (0% to 0%)             |
| 35 | Turkey  | Foreign body in other body part                 | 0 (0 to 0) | 0 (0 to 0) | -7.9% (-12.6% to -3.9%)   |
| 36 | Turkey  | Motor vehicle road injuries                     | 0 (0 to 1) | 0 (0 to 1) | -15.3% (-22.1% to -7.3%)  |
| 37 | Turkey  | Motorcyclist road injuries                      | 0 (0 to 0) | 0 (0 to 0) | 10.8% (0% to 23.1%)       |
| 38 | Turkey  | Non-venomous animal contact                     | 0 (0 to 0) | 0 (0 to 0) | -17.1% (-21.7% to -12.8%) |
| 39 | Turkey  | Other exposure to mechanical forces             | 0 (0 to 0) | 0 (0 to 0) | -4.4% (-10.7% to 2.6%)    |
| 40 | Turkey  | Other road injuries                             | 0 (0 to 0) | 0 (0 to 0) | -63.3% (-69.9% to -56.6%) |
| 41 | Turkey  | Other transport injuries                        | 0 (0 to 0) | 0 (0 to 0) | -13.3% (-17.6% to -8.5%)  |
| 42 | Turkey  | Other unintentional injuries                    | 0 (0 to 0) | 0 (0 to 0) | -23.9% (-29.8% to -17.3%) |
| 43 | Turkey  | Pedestrian road injuries                        | 0 (0 to 0) | 0 (0 to 0) | -9.9% (-18.3% to -0.7%)   |
| 44 | Turkey  | Physical violence by firearm                    | 0 (0 to 0) | 0 (0 to 0) | 45.7% (22.7% to 75.1%)    |
| 45 |         |                                                 |            |            |                           |
| 46 |         |                                                 |            |            |                           |

|    |              |                                                 |            |            |                           |
|----|--------------|-------------------------------------------------|------------|------------|---------------------------|
| 1  |              |                                                 |            |            |                           |
| 2  | Turkey       | Physical violence by other means                | 0 (0 to 0) | 0 (0 to 0) | -36.4% (-43.7% to -28.8%) |
| 3  | Turkey       | Physical violence by sharp object               | 0 (0 to 0) | 0 (0 to 0) | -32.3% (-40.8% to -23.5%) |
| 4  | Turkey       | Poisoning by carbon monoxide                    | 0 (0 to 0) | 0 (0 to 0) | 46.8% (28.7% to 70.1%)    |
| 5  | Turkey       | Poisoning by other means                        | 0 (0 to 0) | 0 (0 to 0) | -16.9% (-23.9% to -9.7%)  |
| 6  | Turkey       | Pulmonary aspiration and foreign body in airway | 0 (0 to 0) | 0 (0 to 0) | -20.1% (-26.2% to -13.4%) |
| 7  | Turkey       | Self-harm by firearm                            | 0 (0 to 0) | 0 (0 to 0) | -6.8% (-17.8% to 4%)      |
| 8  | Turkey       | Self-harm by other specified means              | 0 (0 to 0) | 0 (0 to 0) | -2.1% (-9.4% to 5.2%)     |
| 9  | Turkey       | Unintentional firearm injuries                  | 0 (0 to 0) | 0 (0 to 0) | -13.2% (-21.8% to -5.7%)  |
| 10 | Turkmenistan | Venomous animal contact                         | 0 (0 to 0) | 0 (0 to 0) | -8.9% (-15.6% to -0.3%)   |
| 11 | Turkmenistan | Adverse effects of medical treatment            | 0 (0 to 0) | 0 (0 to 0) | 0% (0% to 0%)             |
| 12 | Turkmenistan | Conflict and terrorism                          | 0 (0 to 0) | 0 (0 to 0) | NA                        |
| 13 | Turkmenistan | Cyclist road injuries                           | 0 (0 to 0) | 0 (0 to 0) | -15.9% (-24.9% to -5.9%)  |
| 14 | Turkmenistan | Drowning                                        | 0 (0 to 0) | 0 (0 to 0) | 10.5% (-3.7% to 23.4%)    |
| 15 | Turkmenistan | Environmental heat and cold exposure            | 0 (0 to 0) | 0 (0 to 0) | 38% (20.6% to 58.3%)      |
| 16 | Turkmenistan | Executions and police conflict                  | 0 (0 to 0) | 0 (0 to 0) | NA                        |
| 17 | Turkmenistan | Exposure to forces of nature                    | 0 (0 to 0) | 0 (0 to 0) | NA                        |
| 18 | Turkmenistan | Falls                                           | 2 (2 to 3) | 2 (2 to 3) | 6.9% (1.3% to 12.1%)      |
| 19 | Turkmenistan | Fire, heat, and hot substances                  | 0 (0 to 0) | 0 (0 to 0) | -39.7% (-46% to -34.1%)   |
| 20 | Turkmenistan | Foreign body in eyes                            | 0 (0 to 0) | 0 (0 to 0) | 0% (0% to 0%)             |
| 21 | Turkmenistan | Foreign body in other body part                 | 0 (0 to 0) | 0 (0 to 0) | -4.4% (-8.5% to 0.2%)     |
| 22 | Turkmenistan | Motor vehicle road injuries                     | 1 (0 to 1) | 1 (0 to 1) | -32% (-39.6% to -23.1%)   |
| 23 | Turkmenistan | Motorcyclist road injuries                      | 0 (0 to 0) | 0 (0 to 0) | -14.7% (-28.8% to 0.5%)   |
| 24 | Turkmenistan | Non-venomous animal contact                     | 0 (0 to 0) | 0 (0 to 0) | -12.1% (-16.3% to -7.3%)  |
| 25 | Turkmenistan | Other exposure to mechanical forces             | 1 (0 to 1) | 1 (0 to 1) | 33.6% (24.6% to 45.1%)    |
| 26 | Turkmenistan | Other road injuries                             | 0 (0 to 0) | 0 (0 to 0) | -17.1% (-27.3% to -5.2%)  |
| 27 | Turkmenistan | Other transport injuries                        | 0 (0 to 0) | 0 (0 to 0) | 8.3% (3.3% to 13.4%)      |
| 28 | Turkmenistan | Other unintentional injuries                    | 0 (0 to 0) | 0 (0 to 0) | 3% (-2.1% to 8.4%)        |
| 29 | Turkmenistan | Pedestrian road injuries                        | 0 (0 to 1) | 0 (0 to 0) | -50.7% (-57.1% to -43.2%) |
| 30 | Turkmenistan | Physical violence by firearm                    | 0 (0 to 0) | 0 (0 to 0) | 13.6% (-5.6% to 34%)      |
| 31 | Turkmenistan | Physical violence by other means                | 0 (0 to 0) | 0 (0 to 0) | -13.7% (-24% to -3%)      |
| 32 | Turkmenistan | Physical violence by sharp object               | 0 (0 to 0) | 0 (0 to 0) | -17.1% (-27.8% to -4.4%)  |
| 33 | Turkmenistan | Poisoning by carbon monoxide                    | 0 (0 to 0) | 0 (0 to 0) | 44.2% (29.9% to 63.5%)    |
| 34 | Turkmenistan | Poisoning by other means                        | 0 (0 to 0) | 0 (0 to 0) | 2.8% (-5.5% to 12.6%)     |
| 35 | Turkmenistan | Pulmonary aspiration and foreign body in airway | 0 (0 to 0) | 0 (0 to 0) | -13.1% (-19.8% to -5.7%)  |
| 36 | Turkmenistan | Self-harm by firearm                            | 0 (0 to 0) | 0 (0 to 0) | 18% (1.4% to 38.9%)       |
| 37 | Turkmenistan | Self-harm by other specified means              | 0 (0 to 0) | 0 (0 to 0) | 27.9% (20.7% to 35.8%)    |
| 38 | Turkmenistan | Unintentional firearm injuries                  | 0 (0 to 0) | 0 (0 to 0) | 20.2% (8.7% to 33.7%)     |
| 39 | Turkmenistan | Venomous animal contact                         | 0 (0 to 0) | 0 (0 to 0) | -12% (-17.2% to -6%)      |
| 40 | Tuvalu       | Adverse effects of medical treatment            | 0 (0 to 0) | 0 (0 to 0) | 0% (0% to 0%)             |
| 41 | Tuvalu       | Conflict and terrorism                          | 0 (0 to 0) | 0 (0 to 0) | NA                        |
| 42 | Tuvalu       | Cyclist road injuries                           | 0 (0 to 1) | 0 (0 to 1) | 7.6% (-0.7% to 16.6%)     |
| 43 | Tuvalu       | Drowning                                        | 0 (0 to 0) | 0 (0 to 0) | 21.4% (12.6% to 30.7%)    |
| 44 | Tuvalu       | Environmental heat and cold exposure            | 0 (0 to 0) | 0 (0 to 0) | -1.3% (-7.4% to 5.1%)     |
| 45 |              |                                                 |            |            |                           |
| 46 |              |                                                 |            |            |                           |

|    |        |                                                 |            |            |                           |
|----|--------|-------------------------------------------------|------------|------------|---------------------------|
| 1  |        |                                                 |            |            |                           |
| 2  | Tuvalu | Executions and police conflict                  | 0 (0 to 0) | 0 (0 to 0) | NA                        |
| 3  | Tuvalu | Exposure to forces of nature                    | 0 (0 to 0) | 0 (0 to 0) | NA                        |
| 4  | Tuvalu | Falls                                           | 3 (2 to 4) | 4 (3 to 6) | 54.1% (48.1% to 59.5%)    |
| 5  | Tuvalu | Fire, heat, and hot substances                  | 0 (0 to 0) | 0 (0 to 0) | 6.1% (-0.6% to 14.4%)     |
| 6  | Tuvalu | Foreign body in eyes                            | 0 (0 to 0) | 0 (0 to 0) | 0% (0% to 0%)             |
| 7  | Tuvalu | Foreign body in other body part                 | 0 (0 to 0) | 0 (0 to 0) | -0.7% (-4.5% to 3.5%)     |
| 8  | Tuvalu | Motor vehicle road injuries                     | 1 (0 to 2) | 1 (0 to 2) | -8.8% (-16.3% to -0.5%)   |
| 9  | Tuvalu | Motorcyclist road injuries                      | 1 (0 to 1) | 1 (0 to 1) | 10.2% (1.1% to 21.1%)     |
| 10 | Tuvalu | Non-venomous animal contact                     | 0 (0 to 0) | 0 (0 to 0) | -16.2% (-20.2% to -11.7%) |
| 11 | Tuvalu | Other exposure to mechanical forces             | 0 (0 to 0) | 0 (0 to 0) | -8% (-13.5% to -1.6%)     |
| 12 | Tuvalu | Other road injuries                             | 0 (0 to 0) | 0 (0 to 0) | 12.3% (1.9% to 24.5%)     |
| 13 | Tuvalu | Other transport injuries                        | 0 (0 to 1) | 0 (0 to 0) | -8.3% (-12.5% to -3.5%)   |
| 14 | Tuvalu | Other unintentional injuries                    | 0 (0 to 0) | 0 (0 to 0) | -5.3% (-10.2% to 0.1%)    |
| 15 | Tuvalu | Pedestrian road injuries                        | 1 (0 to 1) | 1 (0 to 1) | -10% (-17.3% to -2.4%)    |
| 16 | Tuvalu | Physical violence by firearm                    | 0 (0 to 0) | 0 (0 to 0) | 22.1% (5.6% to 41.8%)     |
| 17 | Tuvalu | Physical violence by other means                | 1 (0 to 1) | 1 (0 to 1) | 12% (4.5% to 20.1%)       |
| 18 | Tuvalu | Physical violence by sharp object               | 0 (0 to 0) | 0 (0 to 0) | -3.7% (-14% to 6.2%)      |
| 19 | Tuvalu | Poisoning by carbon monoxide                    | 0 (0 to 0) | 0 (0 to 0) | 20% (6.8% to 34%)         |
| 20 | Tuvalu | Poisoning by other means                        | 0 (0 to 0) | 0 (0 to 0) | -9.9% (-18.4% to -1.3%)   |
| 21 | Tuvalu | Pulmonary aspiration and foreign body in airway | 0 (0 to 0) | 0 (0 to 0) | -16.5% (-26% to -6.5%)    |
| 22 | Tuvalu | Self-harm by firearm                            | 0 (0 to 0) | 0 (0 to 0) | 11% (-3.9% to 28.3%)      |
| 23 | Tuvalu | Self-harm by other specified means              | 0 (0 to 0) | 0 (0 to 0) | -15.4% (-22.3% to -7.7%)  |
| 24 | Tuvalu | Unintentional firearm injuries                  | 0 (0 to 0) | 0 (0 to 0) | -20.7% (-29.2% to -13.8%) |
| 25 | Tuvalu | Venomous animal contact                         | 0 (0 to 0) | 0 (0 to 0) | -7.4% (-14.5% to 2.3%)    |
| 26 | Uganda | Adverse effects of medical treatment            | 0 (0 to 0) | 0 (0 to 0) | 0% (0% to 0%)             |
| 27 | Uganda | Conflict and terrorism                          | 2 (0 to 5) | 0 (0 to 0) | NA                        |
| 28 | Uganda | Cyclist road injuries                           | 2 (1 to 3) | 2 (1 to 3) | 7.4% (0.2% to 14.9%)      |
| 29 | Uganda | Drowning                                        | 0 (0 to 0) | 0 (0 to 0) | 3.3% (-3.9% to 12.5%)     |
| 30 | Uganda | Environmental heat and cold exposure            | 0 (0 to 0) | 0 (0 to 0) | -1.5% (-6.6% to 3.6%)     |
| 31 | Uganda | Executions and police conflict                  | 0 (0 to 0) | 0 (0 to 0) | NA                        |
| 32 | Uganda | Exposure to forces of nature                    | 0 (0 to 0) | 0 (0 to 0) | NA                        |
| 33 | Uganda | Falls                                           | 3 (2 to 4) | 4 (2 to 5) | 20% (16.1% to 23.7%)      |
| 34 | Uganda | Fire, heat, and hot substances                  | 0 (0 to 0) | 0 (0 to 0) | -5.9% (-10.2% to -1.7%)   |
| 35 | Uganda | Foreign body in eyes                            | 0 (0 to 0) | 0 (0 to 0) | 0% (0% to 0%)             |
| 36 | Uganda | Foreign body in other body part                 | 1 (0 to 1) | 1 (0 to 1) | -9.3% (-12.8% to -6%)     |
| 37 | Uganda | Motor vehicle road injuries                     | 1 (0 to 2) | 1 (1 to 2) | 6.3% (-2.1% to 15.9%)     |
| 38 | Uganda | Motorcyclist road injuries                      | 0 (0 to 1) | 1 (0 to 1) | 9.1% (0.5% to 17.8%)      |
| 39 | Uganda | Non-venomous animal contact                     | 0 (0 to 1) | 0 (0 to 1) | -18.3% (-22.2% to -14.8%) |
| 40 | Uganda | Other exposure to mechanical forces             | 0 (0 to 0) | 0 (0 to 0) | -6.6% (-11.7% to -0.4%)   |
| 41 | Uganda | Other road injuries                             | 0 (0 to 0) | 0 (0 to 0) | -13.8% (-21.3% to -5.7%)  |
| 42 | Uganda | Other transport injuries                        | 0 (0 to 1) | 0 (0 to 1) | -8.3% (-11.9% to -4.4%)   |
| 43 | Uganda | Other unintentional injuries                    | 0 (0 to 0) | 0 (0 to 0) | -7.1% (-12.7% to -1.1%)   |
| 44 | Uganda | Pedestrian road injuries                        | 2 (1 to 3) | 2 (1 to 3) | -5.4% (-12.1% to 1.1%)    |
| 45 |        |                                                 |            |            |                           |
| 46 |        |                                                 |            |            |                           |

|    |                      |                                                 |             |            |                           |
|----|----------------------|-------------------------------------------------|-------------|------------|---------------------------|
| 1  |                      |                                                 |             |            |                           |
| 2  | Uganda               | Physical violence by firearm                    | 0 (0 to 0)  | 0 (0 to 0) | 33.9% (17.3% to 53%)      |
| 3  | Uganda               | Physical violence by other means                | 0 (0 to 0)  | 0 (0 to 0) | 5.9% (-0.2% to 12.5%)     |
| 4  | Uganda               | Physical violence by sharp object               | 0 (0 to 0)  | 0 (0 to 0) | 5.4% (-2.2% to 13.8%)     |
| 5  | Uganda               | Poisoning by carbon monoxide                    | 0 (0 to 0)  | 0 (0 to 0) | 16.4% (3.3% to 30.1%)     |
| 6  | Uganda               | Poisoning by other means                        | 0 (0 to 0)  | 0 (0 to 0) | -12.3% (-19.1% to -4.4%)  |
| 7  | Uganda               | Pulmonary aspiration and foreign body in airway | 0 (0 to 0)  | 0 (0 to 0) | -15.6% (-25.8% to -3.8%)  |
| 8  | Uganda               | Self-harm by firearm                            | 0 (0 to 0)  | 0 (0 to 0) | 19.6% (5.8% to 37.3%)     |
| 9  | Uganda               | Self-harm by other specified means              | 0 (0 to 0)  | 0 (0 to 0) | 5.9% (1.2% to 11.2%)      |
| 10 | Uganda               | Unintentional firearm injuries                  | 0 (0 to 0)  | 0 (0 to 0) | -17.7% (-25.7% to -10.4%) |
| 11 | Ukraine              | Venomous animal contact                         | 0 (0 to 0)  | 0 (0 to 0) | -22.9% (-31% to -15%)     |
| 12 | Ukraine              | Adverse effects of medical treatment            | 0 (0 to 0)  | 0 (0 to 0) | 0% (0% to 0%)             |
| 13 | Ukraine              | Conflict and terrorism                          | 0 (0 to 0)  | 0 (0 to 1) | NA                        |
| 14 | Ukraine              | Cyclist road injuries                           | 1 (0 to 1)  | 0 (0 to 1) | -13.7% (-19.3% to -6.9%)  |
| 15 | Ukraine              | Drowning                                        | 0 (0 to 0)  | 0 (0 to 0) | -48.6% (-53.1% to -43.1%) |
| 16 | Ukraine              | Environmental heat and cold exposure            | 0 (0 to 1)  | 0 (0 to 0) | -7% (-15.6% to 2.5%)      |
| 17 | Ukraine              | Executions and police conflict                  | 0 (0 to 0)  | 0 (0 to 0) | NA                        |
| 18 | Ukraine              | Exposure to forces of nature                    | 0 (0 to 0)  | 0 (0 to 0) | NA                        |
| 19 | Ukraine              | Falls                                           | 7 (5 to 10) | 6 (4 to 8) | -21.3% (-24.1% to -18.2%) |
| 20 | Ukraine              | Fire, heat, and hot substances                  | 0 (0 to 0)  | 0 (0 to 0) | -22.9% (-26.1% to -19.5%) |
| 21 | Ukraine              | Foreign body in eyes                            | 0 (0 to 0)  | 0 (0 to 0) | 0% (0% to 0%)             |
| 22 | Ukraine              | Foreign body in other body part                 | 0 (0 to 0)  | 0 (0 to 0) | -2.2% (-6.3% to 1.7%)     |
| 23 | Ukraine              | Motor vehicle road injuries                     | 2 (1 to 4)  | 2 (1 to 3) | -12.2% (-17% to -6.3%)    |
| 24 | Ukraine              | Motorcyclist road injuries                      | 0 (0 to 1)  | 0 (0 to 0) | -21% (-27.3% to -13.6%)   |
| 25 | Ukraine              | Non-venomous animal contact                     | 0 (0 to 0)  | 0 (0 to 0) | 5.6% (1.7% to 9.5%)       |
| 26 | Ukraine              | Other exposure to mechanical forces             | 1 (0 to 2)  | 1 (0 to 2) | -3.1% (-7.4% to 1.5%)     |
| 27 | Ukraine              | Other road injuries                             | 0 (0 to 0)  | 0 (0 to 0) | -7.3% (-14.4% to 1%)      |
| 28 | Ukraine              | Other transport injuries                        | 0 (0 to 0)  | 0 (0 to 0) | 14.1% (6.3% to 24.5%)     |
| 29 | Ukraine              | Other unintentional injuries                    | 0 (0 to 0)  | 0 (0 to 0) | -2% (-6.2% to 2.4%)       |
| 30 | Ukraine              | Pedestrian road injuries                        | 1 (0 to 1)  | 1 (0 to 1) | -34.1% (-39.1% to -28.8%) |
| 31 | Ukraine              | Physical violence by firearm                    | 0 (0 to 0)  | 0 (0 to 0) | 11.7% (1.6% to 22.9%)     |
| 32 | Ukraine              | Physical violence by other means                | 1 (0 to 1)  | 0 (0 to 1) | -9.2% (-13.7% to -4%)     |
| 33 | Ukraine              | Physical violence by sharp object               | 0 (0 to 0)  | 0 (0 to 0) | -19.2% (-25.1% to -12.9%) |
| 34 | Ukraine              | Poisoning by carbon monoxide                    | 0 (0 to 0)  | 0 (0 to 0) | -39% (-45.8% to -31.4%)   |
| 35 | Ukraine              | Poisoning by other means                        | 0 (0 to 0)  | 0 (0 to 0) | -6.7% (-13.1% to -0.3%)   |
| 36 | Ukraine              | Pulmonary aspiration and foreign body in airway | 0 (0 to 0)  | 0 (0 to 0) | -5.2% (-11.7% to 1.9%)    |
| 37 | Ukraine              | Self-harm by firearm                            | 0 (0 to 0)  | 0 (0 to 0) | -5.2% (-17.8% to 8.8%)    |
| 38 | Ukraine              | Self-harm by other specified means              | 0 (0 to 1)  | 1 (0 to 1) | 39.6% (27.9% to 53.6%)    |
| 39 | Ukraine              | Unintentional firearm injuries                  | 0 (0 to 0)  | 0 (0 to 0) | -5.8% (-12.1% to 0.7%)    |
| 40 | Ukraine              | Venomous animal contact                         | 0 (0 to 0)  | 0 (0 to 0) | 6.1% (0.5% to 11.6%)      |
| 41 | United Arab Emirates | Adverse effects of medical treatment            | 0 (0 to 0)  | 0 (0 to 0) | 0% (0% to 0%)             |
| 42 | United Arab Emirates | Conflict and terrorism                          | 0 (0 to 0)  | 0 (0 to 0) | NA                        |
| 43 | United Arab Emirates | Cyclist road injuries                           | 0 (0 to 0)  | 0 (0 to 0) | -6.6% (-14.9% to 2.7%)    |
| 44 | United Arab Emirates | Drowning                                        | 0 (0 to 0)  | 0 (0 to 0) | 47.3% (23.5% to 76.3%)    |
| 45 |                      |                                                 |             |            |                           |
| 46 |                      |                                                 |             |            |                           |

|    |                      |                                                 |            |             |                           |
|----|----------------------|-------------------------------------------------|------------|-------------|---------------------------|
| 1  |                      |                                                 |            |             |                           |
| 2  | United Arab Emirates | Environmental heat and cold exposure            | 0 (0 to 0) | 0 (0 to 0)  | 1.5% (-3.1% to 6.4%)      |
| 3  | United Arab Emirates | Executions and police conflict                  | 0 (0 to 0) | 0 (0 to 0)  | NA                        |
| 4  | United Arab Emirates | Exposure to forces of nature                    | 0 (0 to 0) | 0 (0 to 0)  | NA                        |
| 5  | United Arab Emirates | Falls                                           | 2 (2 to 3) | 2 (2 to 3)  | 13.9% (9.7% to 18.3%)     |
| 6  | United Arab Emirates | Fire, heat, and hot substances                  | 0 (0 to 0) | 0 (0 to 0)  | -17.6% (-23.1% to -11.1%) |
| 7  | United Arab Emirates | Foreign body in eyes                            | 0 (0 to 0) | 0 (0 to 0)  | 0% (0% to 0%)             |
| 8  | United Arab Emirates | Foreign body in other body part                 | 0 (0 to 0) | 0 (0 to 0)  | -0.2% (-4.8% to 4.4%)     |
| 9  | United Arab Emirates | Motor vehicle road injuries                     | 1 (1 to 2) | 1 (1 to 2)  | -16.4% (-22.3% to -10.1%) |
| 10 | United Arab Emirates | Motorcyclist road injuries                      | 0 (0 to 0) | 0 (0 to 0)  | -11.4% (-20.6% to -0.6%)  |
| 11 | United Arab Emirates | Non-venomous animal contact                     | 0 (0 to 0) | 0 (0 to 0)  | 7% (1.4% to 12%)          |
| 12 | United Arab Emirates | Other exposure to mechanical forces             | 0 (0 to 1) | 0 (0 to 1)  | -15.2% (-21% to -9.9%)    |
| 13 | United Arab Emirates | Other road injuries                             | 0 (0 to 0) | 0 (0 to 0)  | 6.5% (-5.1% to 20.6%)     |
| 14 | United Arab Emirates | Other transport injuries                        | 0 (0 to 0) | 0 (0 to 0)  | 8.2% (3.2% to 13.6%)      |
| 15 | United Arab Emirates | Other unintentional injuries                    | 0 (0 to 0) | 0 (0 to 0)  | -11% (-16.7% to -5.1%)    |
| 16 | United Arab Emirates | Pedestrian road injuries                        | 1 (0 to 1) | 0 (0 to 1)  | -34.8% (-41.6% to -27.7%) |
| 17 | United Arab Emirates | Physical violence by firearm                    | 0 (0 to 0) | 0 (0 to 0)  | 72.7% (49.3% to 101.8%)   |
| 18 | United Arab Emirates | Physical violence by other means                | 0 (0 to 0) | 0 (0 to 0)  | -15.8% (-23.4% to -8.7%)  |
| 19 | United Arab Emirates | Physical violence by sharp object               | 0 (0 to 0) | 0 (0 to 0)  | -14.1% (-24.1% to -4.7%)  |
| 20 | United Arab Emirates | Poisoning by carbon monoxide                    | 0 (0 to 0) | 0 (0 to 0)  | 34.5% (22% to 50.9%)      |
| 21 | United Arab Emirates | Poisoning by other means                        | 0 (0 to 0) | 0 (0 to 0)  | -10.2% (-16.8% to -3%)    |
| 22 | United Arab Emirates | Pulmonary aspiration and foreign body in airway | 0 (0 to 0) | 0 (0 to 0)  | -1.5% (-10.1% to 7.8%)    |
| 23 | United Arab Emirates | Self-harm by firearm                            | 0 (0 to 0) | 0 (0 to 0)  | -0.5% (-10.6% to 11.6%)   |
| 24 | United Arab Emirates | Self-harm by other specified means              | 0 (0 to 0) | 0 (0 to 0)  | 2.5% (-3.3% to 9.2%)      |
| 25 | United Arab Emirates | Unintentional firearm injuries                  | 0 (0 to 0) | 0 (0 to 0)  | -6.9% (-14.1% to 1.5%)    |
| 26 | United Arab Emirates | Venomous animal contact                         | 0 (0 to 0) | 0 (0 to 0)  | 5.1% (-2.9% to 13%)       |
| 27 | United Kingdom       | Adverse effects of medical treatment            | 0 (0 to 0) | 0 (0 to 0)  | 0% (0% to 0%)             |
| 28 | United Kingdom       | Conflict and terrorism                          | 0 (0 to 0) | 0 (0 to 0)  | NA                        |
| 29 | United Kingdom       | Cyclist road injuries                           | 0 (0 to 0) | 0 (0 to 0)  | -25.1% (-29.3% to -21%)   |
| 30 | United Kingdom       | Drowning                                        | 0 (0 to 0) | 0 (0 to 0)  | 1.3% (-2% to 4.7%)        |
| 31 | United Kingdom       | Environmental heat and cold exposure            | 0 (0 to 0) | 0 (0 to 0)  | -26.9% (-32% to -22.3%)   |
| 32 | United Kingdom       | Executions and police conflict                  | 0 (0 to 0) | 0 (0 to 0)  | NA                        |
| 33 | United Kingdom       | Exposure to forces of nature                    | 0 (0 to 0) | 0 (0 to 0)  | NA                        |
| 34 | United Kingdom       | Falls                                           | 6 (4 to 8) | 7 (5 to 10) | 23.2% (20.7% to 25.7%)    |
| 35 | United Kingdom       | Fire, heat, and hot substances                  | 0 (0 to 0) | 0 (0 to 0)  | -25.4% (-29.5% to -21.8%) |
| 36 | United Kingdom       | Foreign body in eyes                            | 0 (0 to 0) | 0 (0 to 0)  | 0% (0% to 0%)             |
| 37 | United Kingdom       | Foreign body in other body part                 | 0 (0 to 0) | 0 (0 to 0)  | -0.1% (-1% to 0.7%)       |
| 38 | United Kingdom       | Motor vehicle road injuries                     | 0 (0 to 1) | 0 (0 to 0)  | -39.5% (-42.9% to -36.4%) |
| 39 | United Kingdom       | Motorcyclist road injuries                      | 0 (0 to 0) | 0 (0 to 0)  | -36.5% (-40.9% to -32.6%) |
| 40 | United Kingdom       | Non-venomous animal contact                     | 0 (0 to 0) | 0 (0 to 0)  | -8.8% (-9.7% to -7.8%)    |
| 41 | United Kingdom       | Other exposure to mechanical forces             | 0 (0 to 1) | 0 (0 to 1)  | -5.2% (-9.9% to -2%)      |
| 42 | United Kingdom       | Other road injuries                             | 0 (0 to 0) | 0 (0 to 0)  | -17.3% (-21.9% to -12.9%) |
| 43 | United Kingdom       | Other transport injuries                        | 0 (0 to 0) | 0 (0 to 0)  | -4.9% (-7% to -3%)        |
| 44 | United Kingdom       | Other unintentional injuries                    | 0 (0 to 1) | 0 (0 to 1)  | -25.5% (-29.9% to -21.2%) |
| 45 |                      |                                                 |            |             |                           |
| 46 |                      |                                                 |            |             |                           |

|    |                             |                                                 |            |            |                           |
|----|-----------------------------|-------------------------------------------------|------------|------------|---------------------------|
| 1  |                             |                                                 |            |            |                           |
| 2  | United Kingdom              | Pedestrian road injuries                        | 0 (0 to 0) | 0 (0 to 0) | -49.9% (-55.1% to -45.1%) |
| 3  | United Kingdom              | Physical violence by firearm                    | 0 (0 to 0) | 0 (0 to 0) | 34.5% (24.3% to 46.4%)    |
| 4  | United Kingdom              | Physical violence by other means                | 0 (0 to 0) | 0 (0 to 0) | -22.7% (-29.3% to -17.4%) |
| 5  | United Kingdom              | Physical violence by sharp object               | 0 (0 to 0) | 0 (0 to 0) | -11.4% (-19.6% to -3.9%)  |
| 6  | United Kingdom              | Poisoning by carbon monoxide                    | 0 (0 to 0) | 0 (0 to 0) | 8.8% (3.3% to 13.9%)      |
| 7  | United Kingdom              | Poisoning by other means                        | 0 (0 to 0) | 0 (0 to 0) | -24.6% (-28.8% to -21.1%) |
| 8  | United Kingdom              | Pulmonary aspiration and foreign body in airway | 0 (0 to 0) | 0 (0 to 0) | -14.7% (-17.3% to -11.8%) |
| 9  | United Kingdom              | Self-harm by firearm                            | 0 (0 to 0) | 0 (0 to 0) | 3.8% (-1.1% to 9.1%)      |
| 10 | United Kingdom              | Self-harm by other specified means              | 0 (0 to 1) | 0 (0 to 0) | -23.9% (-27% to -20.9%)   |
| 11 | United Kingdom              | Unintentional firearm injuries                  | 0 (0 to 0) | 0 (0 to 0) | 2.5% (-1.4% to 6%)        |
| 12 | United Kingdom              | Venomous animal contact                         | 0 (0 to 0) | 0 (0 to 0) | -10.8% (-11.8% to -9.6%)  |
| 13 | United Republic of Tanzania | Adverse effects of medical treatment            | 0 (0 to 0) | 0 (0 to 0) | 0% (0% to 0%)             |
| 14 | United Republic of Tanzania | Conflict and terrorism                          | 0 (0 to 0) | 0 (0 to 0) | NA                        |
| 15 | United Republic of Tanzania | Cyclist road injuries                           | 2 (1 to 3) | 1 (1 to 3) | -2.8% (-9.1% to 4%)       |
| 16 | United Republic of Tanzania | Drowning                                        | 0 (0 to 0) | 0 (0 to 0) | 3.6% (-4.7% to 11.9%)     |
| 17 | United Republic of Tanzania | Environmental heat and cold exposure            | 0 (0 to 0) | 0 (0 to 0) | -1.9% (-6.8% to 2.8%)     |
| 18 | United Republic of Tanzania | Executions and police conflict                  | 0 (0 to 0) | 0 (0 to 0) | NA                        |
| 19 | United Republic of Tanzania | Exposure to forces of nature                    | 0 (0 to 0) | 0 (0 to 0) | NA                        |
| 20 | United Republic of Tanzania | Falls                                           | 3 (2 to 5) | 4 (3 to 6) | 19.3% (15.3% to 23.5%)    |
| 21 | United Republic of Tanzania | Fire, heat, and hot substances                  | 0 (0 to 0) | 0 (0 to 0) | -5.5% (-9.8% to -1.6%)    |
| 22 | United Republic of Tanzania | Foreign body in eyes                            | 0 (0 to 0) | 0 (0 to 0) | 0% (0% to 0%)             |
| 23 | United Republic of Tanzania | Foreign body in other body part                 | 1 (0 to 1) | 1 (0 to 1) | -4.5% (-7.8% to -1.2%)    |
| 24 | United Republic of Tanzania | Motor vehicle road injuries                     | 1 (0 to 2) | 1 (0 to 2) | -1% (-9.9% to 6.9%)       |
| 25 | United Republic of Tanzania | Motorcyclist road injuries                      | 1 (0 to 1) | 0 (0 to 1) | -12.5% (-19.2% to -5.4%)  |
| 26 | United Republic of Tanzania | Non-venomous animal contact                     | 0 (0 to 1) | 0 (0 to 1) | -16.9% (-20.7% to -13.1%) |
| 27 | United Republic of Tanzania | Other exposure to mechanical forces             | 0 (0 to 0) | 0 (0 to 0) | -4.7% (-9.9% to -0.1%)    |
| 28 | United Republic of Tanzania | Other road injuries                             | 0 (0 to 0) | 0 (0 to 0) | -2.1% (-10.6% to 6.7%)    |
| 29 | United Republic of Tanzania | Other transport injuries                        | 0 (0 to 1) | 0 (0 to 0) | -3% (-7% to 1.1%)         |
| 30 | United Republic of Tanzania | Other unintentional injuries                    | 0 (0 to 0) | 0 (0 to 0) | -10% (-15.5% to -4.5%)    |
| 31 | United Republic of Tanzania | Pedestrian road injuries                        | 2 (1 to 3) | 2 (1 to 3) | -7.5% (-13.6% to -1.3%)   |
| 32 | United Republic of Tanzania | Physical violence by firearm                    | 0 (0 to 0) | 0 (0 to 0) | 31.2% (16.8% to 49.1%)    |
| 33 | United Republic of Tanzania | Physical violence by other means                | 0 (0 to 0) | 0 (0 to 0) | 0.7% (-5.1% to 6.3%)      |
| 34 | United Republic of Tanzania | Physical violence by sharp object               | 0 (0 to 0) | 0 (0 to 0) | 0% (-7.8% to 7.8%)        |
| 35 | United Republic of Tanzania | Poisoning by carbon monoxide                    | 0 (0 to 0) | 0 (0 to 0) | 16.5% (4.3% to 29.1%)     |
| 36 | United Republic of Tanzania | Poisoning by other means                        | 0 (0 to 0) | 0 (0 to 0) | -12.5% (-19.3% to -5.2%)  |
| 37 | United Republic of Tanzania | Pulmonary aspiration and foreign body in airway | 0 (0 to 0) | 0 (0 to 0) | -15.4% (-25% to -5.2%)    |
| 38 | United Republic of Tanzania | Self-harm by firearm                            | 0 (0 to 0) | 0 (0 to 0) | 10.3% (0% to 25%)         |
| 39 | United Republic of Tanzania | Self-harm by other specified means              | 0 (0 to 0) | 0 (0 to 0) | -6.6% (-11.2% to -2.1%)   |
| 40 | United Republic of Tanzania | Unintentional firearm injuries                  | 0 (0 to 0) | 0 (0 to 0) | -10.1% (-17.4% to -2.7%)  |
| 41 | United Republic of Tanzania | Venomous animal contact                         | 0 (0 to 0) | 0 (0 to 0) | -16% (-22.9% to -9.1%)    |
| 42 | United States of America    | Adverse effects of medical treatment            | 0 (0 to 0) | 0 (0 to 0) | 0% (0% to 0%)             |
| 43 | United States of America    | Conflict and terrorism                          | 0 (0 to 0) | 0 (0 to 0) | NA                        |
| 44 | United States of America    | Cyclist road injuries                           | 0 (0 to 1) | 0 (0 to 1) | -3.3% (-14.1% to 7.3%)    |
| 45 |                             |                                                 |            |            |                           |
| 46 |                             |                                                 |            |            |                           |

|    |                              |                                                 |              |               |                           |
|----|------------------------------|-------------------------------------------------|--------------|---------------|---------------------------|
| 1  |                              |                                                 |              |               |                           |
| 2  | United States of America     | Drowning                                        | 0 (0 to 0)   | 0 (0 to 0)    | -2.9% (-5.8% to -0.6%)    |
| 3  | United States of America     | Environmental heat and cold exposure            | 0 (0 to 0)   | 0 (0 to 0)    | -6.7% (-10.2% to -3.3%)   |
| 4  | United States of America     | Executions and police conflict                  | 0 (0 to 0)   | 0 (0 to 0)    | NA                        |
| 5  | United States of America     | Exposure to forces of nature                    | 0 (0 to 0)   | 0 (0 to 0)    | NA                        |
| 6  | United States of America     | Falls                                           | 12 (8 to 19) | 15 (10 to 23) | 19.3% (12.9% to 25%)      |
| 7  | United States of America     | Fire, heat, and hot substances                  | 0 (0 to 0)   | 0 (0 to 0)    | -26.6% (-29.9% to -24%)   |
| 8  | United States of America     | Foreign body in eyes                            | 0 (0 to 0)   | 0 (0 to 0)    | 0% (0% to 0%)             |
| 9  | United States of America     | Foreign body in other body part                 | 1 (0 to 1)   | 1 (0 to 1)    | 25.5% (20.7% to 30.7%)    |
| 10 | United States of America     | Motor vehicle road injuries                     | 3 (1 to 5)   | 2 (1 to 4)    | -17.7% (-22% to -13.8%)   |
| 11 | United States of America     | Motorcyclist road injuries                      | 0 (0 to 1)   | 1 (0 to 1)    | 14.2% (3.7% to 25.8%)     |
| 12 | United States of America     | Non-venomous animal contact                     | 0 (0 to 1)   | 0 (0 to 1)    | 13.8% (11% to 17.2%)      |
| 13 | United States of America     | Other exposure to mechanical forces             | 1 (0 to 2)   | 1 (0 to 1)    | -28.5% (-31.6% to -25.9%) |
| 14 | United States of America     | Other road injuries                             | 0 (0 to 0)   | 0 (0 to 0)    | -5.9% (-11.1% to -0.8%)   |
| 15 | United States of America     | Other transport injuries                        | 2 (1 to 3)   | 1 (1 to 2)    | -29.5% (-32.4% to -26.4%) |
| 16 | United States of America     | Other unintentional injuries                    | 1 (1 to 2)   | 1 (1 to 2)    | 15.2% (9.5% to 19.6%)     |
| 17 | United States of America     | Pedestrian road injuries                        | 0 (0 to 1)   | 0 (0 to 1)    | -19.9% (-26.8% to -13.5%) |
| 18 | United States of America     | Physical violence by firearm                    | 0 (0 to 0)   | 0 (0 to 0)    | 1.3% (-6.3% to 10.7%)     |
| 19 | United States of America     | Physical violence by other means                | 1 (0 to 1)   | 0 (0 to 1)    | -16.8% (-20.5% to -12.9%) |
| 20 | United States of America     | Physical violence by sharp object               | 0 (0 to 0)   | 0 (0 to 0)    | -31.5% (-35.7% to -27.8%) |
| 21 | United States of America     | Poisoning by carbon monoxide                    | 0 (0 to 0)   | 0 (0 to 0)    | -0.8% (-4.9% to 2.9%)     |
| 22 | United States of America     | Poisoning by other means                        | 0 (0 to 0)   | 0 (0 to 0)    | -18.9% (-22.1% to -15.3%) |
| 23 | United States of America     | Pulmonary aspiration and foreign body in airway | 0 (0 to 0)   | 0 (0 to 0)    | 9.9% (6.5% to 13.2%)      |
| 24 | United States of America     | Self-harm by firearm                            | 0 (0 to 0)   | 0 (0 to 0)    | -13.6% (-19.2% to -8.3%)  |
| 25 | United States of America     | Self-harm by other specified means              | 0 (0 to 0)   | 0 (0 to 0)    | 13.2% (10% to 16.1%)      |
| 26 | United States of America     | Unintentional firearm injuries                  | 0 (0 to 0)   | 0 (0 to 0)    | -46.3% (-53% to -41.1%)   |
| 27 | United States of America     | Venomous animal contact                         | 0 (0 to 0)   | 0 (0 to 0)    | -4.6% (-9.4% to -0.8%)    |
| 28 | United States Virgin Islands | Adverse effects of medical treatment            | 0 (0 to 0)   | 0 (0 to 0)    | 0% (0% to 0%)             |
| 29 | United States Virgin Islands | Conflict and terrorism                          | 0 (0 to 0)   | 0 (0 to 0)    | NA                        |
| 30 | United States Virgin Islands | Cyclist road injuries                           | 1 (0 to 2)   | 1 (0 to 1)    | -26.3% (-34.6% to -17.7%) |
| 31 | United States Virgin Islands | Drowning                                        | 0 (0 to 0)   | 0 (0 to 0)    | 35.3% (24% to 47.1%)      |
| 32 | United States Virgin Islands | Environmental heat and cold exposure            | 0 (0 to 1)   | 0 (0 to 1)    | -3.5% (-7.1% to -0.1%)    |
| 33 | United States Virgin Islands | Executions and police conflict                  | 0 (0 to 0)   | 0 (0 to 0)    | NA                        |
| 34 | United States Virgin Islands | Exposure to forces of nature                    | 0 (0 to 0)   | 0 (0 to 0)    | NA                        |
| 35 | United States Virgin Islands | Falls                                           | 4 (2 to 5)   | 5 (3 to 7)    | 38.9% (33.9% to 43.8%)    |
| 36 | United States Virgin Islands | Fire, heat, and hot substances                  | 0 (0 to 0)   | 0 (0 to 0)    | 0.4% (-5.1% to 5.1%)      |
| 37 | United States Virgin Islands | Foreign body in eyes                            | 0 (0 to 0)   | 0 (0 to 0)    | 0% (0% to 0%)             |
| 38 | United States Virgin Islands | Foreign body in other body part                 | 0 (0 to 0)   | 0 (0 to 0)    | -1.4% (-5.8% to 3.5%)     |
| 39 | United States Virgin Islands | Motor vehicle road injuries                     | 1 (1 to 2)   | 1 (0 to 1)    | -29.2% (-36.9% to -21.4%) |
| 40 | United States Virgin Islands | Motorcyclist road injuries                      | 1 (0 to 1)   | 1 (0 to 1)    | 8.6% (-3.5% to 23.3%)     |
| 41 | United States Virgin Islands | Non-venomous animal contact                     | 0 (0 to 0)   | 0 (0 to 0)    | -15.2% (-18.9% to -10.8%) |
| 42 | United States Virgin Islands | Other exposure to mechanical forces             | 1 (0 to 1)   | 1 (0 to 1)    | 17.8% (11.5% to 24.4%)    |
| 43 | United States Virgin Islands | Other road injuries                             | 0 (0 to 0)   | 0 (0 to 0)    | -20.1% (-29.8% to -9.1%)  |
| 44 | United States Virgin Islands | Other transport injuries                        | 0 (0 to 1)   | 0 (0 to 1)    | 3.5% (-1.7% to 8.9%)      |
| 45 |                              |                                                 |              |               |                           |
| 46 |                              |                                                 |              |               |                           |



|    |                              |                                                 |            |            |                           |
|----|------------------------------|-------------------------------------------------|------------|------------|---------------------------|
| 1  |                              |                                                 |            |            |                           |
| 2  | United States Virgin Islands | Other unintentional injuries                    | 0 (0 to 1) | 0 (0 to 1) | -3.4% (-8.2% to 1.2%)     |
| 3  | United States Virgin Islands | Pedestrian road injuries                        | 1 (0 to 2) | 1 (0 to 1) | -39% (-45.4% to -32.2%)   |
| 4  | United States Virgin Islands | Physical violence by firearm                    | 0 (0 to 0) | 0 (0 to 0) | 31.7% (10.1% to 61.2%)    |
| 5  | United States Virgin Islands | Physical violence by other means                | 0 (0 to 1) | 0 (0 to 1) | -10.8% (-19.3% to -2.3%)  |
| 6  | United States Virgin Islands | Physical violence by sharp object               | 0 (0 to 0) | 0 (0 to 0) | -28.2% (-39% to -18.2%)   |
| 7  | United States Virgin Islands | Poisoning by carbon monoxide                    | 0 (0 to 0) | 0 (0 to 0) | 10.4% (-1.1% to 23.3%)    |
| 8  | United States Virgin Islands | Poisoning by other means                        | 0 (0 to 0) | 0 (0 to 0) | -7.9% (-15.1% to -0.2%)   |
| 9  | United States Virgin Islands | Pulmonary aspiration and foreign body in airway | 0 (0 to 0) | 0 (0 to 0) | -15.2% (-24.4% to -5.7%)  |
| 10 | United States Virgin Islands | Self-harm by firearm                            | 0 (0 to 0) | 0 (0 to 0) | -1.7% (-11.6% to 11%)     |
| 11 | United States Virgin Islands | Self-harm by other specified means              | 0 (0 to 0) | 0 (0 to 0) | -25.1% (-33.4% to -17%)   |
| 12 | United States Virgin Islands | Unintentional firearm injuries                  | 0 (0 to 0) | 0 (0 to 0) | 16.7% (8.6% to 24.8%)     |
| 13 | United States Virgin Islands | Venomous animal contact                         | 0 (0 to 0) | 0 (0 to 0) | -18.1% (-22.4% to -13.5%) |
| 14 | Uruguay                      | Adverse effects of medical treatment            | 0 (0 to 0) | 0 (0 to 0) | 0% (0% to 0%)             |
| 15 | Uruguay                      | Conflict and terrorism                          | 0 (0 to 0) | 0 (0 to 0) | NA                        |
| 16 | Uruguay                      | Cyclist road injuries                           | 0 (0 to 0) | 0 (0 to 0) | 7.7% (-3.4% to 21.8%)     |
| 17 | Uruguay                      | Drowning                                        | 0 (0 to 0) | 0 (0 to 0) | 10.5% (-3% to 24.5%)      |
| 18 | Uruguay                      | Environmental heat and cold exposure            | 0 (0 to 0) | 0 (0 to 0) | 10.4% (6.2% to 15.4%)     |
| 19 | Uruguay                      | Executions and police conflict                  | 0 (0 to 0) | 0 (0 to 0) | NA                        |
| 20 | Uruguay                      | Exposure to forces of nature                    | 0 (0 to 0) | 0 (0 to 0) | NA                        |
| 21 | Uruguay                      | Falls                                           | 3 (2 to 4) | 3 (2 to 5) | 10.2% (6.6% to 13.8%)     |
| 22 | Uruguay                      | Fire, heat, and hot substances                  | 0 (0 to 0) | 0 (0 to 0) | 9.4% (4.5% to 14.1%)      |
| 23 | Uruguay                      | Foreign body in eyes                            | 0 (0 to 0) | 0 (0 to 0) | 0% (0% to 0%)             |
| 24 | Uruguay                      | Foreign body in other body part                 | 0 (0 to 0) | 0 (0 to 0) | -0.4% (-4.3% to 3.6%)     |
| 25 | Uruguay                      | Motor vehicle road injuries                     | 1 (0 to 1) | 1 (0 to 1) | 2.4% (-7.9% to 13.4%)     |
| 26 | Uruguay                      | Motorcyclist road injuries                      | 0 (0 to 0) | 0 (0 to 0) | 79.1% (56.1% to 110%)     |
| 27 | Uruguay                      | Non-venomous animal contact                     | 0 (0 to 0) | 0 (0 to 0) | -11.4% (-14.9% to -7.7%)  |
| 28 | Uruguay                      | Other exposure to mechanical forces             | 1 (1 to 2) | 1 (0 to 2) | -14.2% (-24.8% to 0.2%)   |
| 29 | Uruguay                      | Other road injuries                             | 0 (0 to 0) | 0 (0 to 0) | -2.9% (-13.9% to 9.6%)    |
| 30 | Uruguay                      | Other transport injuries                        | 0 (0 to 0) | 0 (0 to 0) | 1.7% (-2.5% to 5.7%)      |
| 31 | Uruguay                      | Other unintentional injuries                    | 0 (0 to 1) | 0 (0 to 1) | -24.3% (-29.9% to -18.1%) |
| 32 | Uruguay                      | Pedestrian road injuries                        | 0 (0 to 0) | 0 (0 to 0) | -22.2% (-31.1% to -11.8%) |
| 33 | Uruguay                      | Physical violence by firearm                    | 0 (0 to 0) | 0 (0 to 0) | 167.8% (128.6% to 226.4%) |
| 34 | Uruguay                      | Physical violence by other means                | 0 (0 to 1) | 0 (0 to 1) | 15.6% (0.6% to 31.1%)     |
| 35 | Uruguay                      | Physical violence by sharp object               | 0 (0 to 0) | 0 (0 to 0) | 54.9% (30.7% to 83.5%)    |
| 36 | Uruguay                      | Poisoning by carbon monoxide                    | 0 (0 to 0) | 0 (0 to 0) | 32.7% (20.5% to 46.3%)    |
| 37 | Uruguay                      | Poisoning by other means                        | 0 (0 to 0) | 0 (0 to 0) | -1.5% (-9.2% to 7%)       |
| 38 | Uruguay                      | Pulmonary aspiration and foreign body in airway | 0 (0 to 0) | 0 (0 to 0) | -27.9% (-34.3% to -21.2%) |
| 39 | Uruguay                      | Self-harm by firearm                            | 0 (0 to 0) | 0 (0 to 0) | 17.1% (1.9% to 33%)       |
| 40 | Uruguay                      | Self-harm by other specified means              | 0 (0 to 0) | 0 (0 to 1) | 80% (68.5% to 94.7%)      |
| 41 | Uruguay                      | Unintentional firearm injuries                  | 1 (0 to 2) | 0 (0 to 1) | -52.5% (-60.1% to -44.7%) |
| 42 | Uruguay                      | Venomous animal contact                         | 0 (0 to 0) | 0 (0 to 0) | -16.5% (-21.7% to -11.9%) |
| 43 | Uzbekistan                   | Adverse effects of medical treatment            | 0 (0 to 0) | 0 (0 to 0) | 0% (0% to 0%)             |
| 44 | Uzbekistan                   | Conflict and terrorism                          | 0 (0 to 0) | 0 (0 to 0) | NA                        |
| 45 |                              |                                                 |            |            |                           |
| 46 |                              |                                                 |            |            |                           |

|    |            |                                                 |            |            |                           |
|----|------------|-------------------------------------------------|------------|------------|---------------------------|
| 1  |            |                                                 |            |            |                           |
| 2  | Uzbekistan | Cyclist road injuries                           | 0 (0 to 0) | 0 (0 to 0) | 15.4% (2.8% to 25.9%)     |
| 3  | Uzbekistan | Drowning                                        | 0 (0 to 0) | 0 (0 to 0) | 9.5% (-1.5% to 20.9%)     |
| 4  | Uzbekistan | Environmental heat and cold exposure            | 0 (0 to 0) | 0 (0 to 0) | -21.3% (-29.8% to -13.6%) |
| 5  | Uzbekistan | Executions and police conflict                  | 0 (0 to 0) | 0 (0 to 0) | NA                        |
| 6  | Uzbekistan | Exposure to forces of nature                    | 0 (0 to 0) | 0 (0 to 0) | NA                        |
| 7  | Uzbekistan | Falls                                           | 3 (2 to 3) | 3 (2 to 3) | 0.6% (-4.7% to 5.4%)      |
| 8  | Uzbekistan | Fire, heat, and hot substances                  | 0 (0 to 0) | 0 (0 to 0) | -23.3% (-29.1% to -17.3%) |
| 9  | Uzbekistan | Foreign body in eyes                            | 0 (0 to 0) | 0 (0 to 0) | 0% (0% to 0%)             |
| 10 | Uzbekistan | Foreign body in other body part                 | 0 (0 to 0) | 0 (0 to 0) | -1.9% (-6% to 2.8%)       |
| 11 | Uzbekistan | Motor vehicle road injuries                     | 1 (0 to 1) | 1 (1 to 2) | 24.2% (11.5% to 36.4%)    |
| 12 | Uzbekistan | Motorcyclist road injuries                      | 0 (0 to 0) | 0 (0 to 0) | 6.2% (-7.6% to 20.4%)     |
| 13 | Uzbekistan | Non-venomous animal contact                     | 0 (0 to 0) | 0 (0 to 0) | -11.9% (-16.1% to -7.4%)  |
| 14 | Uzbekistan | Other exposure to mechanical forces             | 0 (0 to 1) | 1 (0 to 1) | 6% (1.4% to 11.2%)        |
| 15 | Uzbekistan | Other road injuries                             | 0 (0 to 0) | 0 (0 to 0) | 11.8% (-2% to 24.3%)      |
| 16 | Uzbekistan | Other transport injuries                        | 0 (0 to 0) | 0 (0 to 0) | 1.6% (-2.7% to 5.9%)      |
| 17 | Uzbekistan | Other unintentional injuries                    | 0 (0 to 1) | 0 (0 to 0) | -19.5% (-26.2% to -12.6%) |
| 18 | Uzbekistan | Pedestrian road injuries                        | 0 (0 to 1) | 0 (0 to 1) | 3.6% (-9.5% to 16.6%)     |
| 19 | Uzbekistan | Physical violence by firearm                    | 0 (0 to 0) | 0 (0 to 0) | 67.7% (43.5% to 98.7%)    |
| 20 | Uzbekistan | Physical violence by other means                | 0 (0 to 0) | 0 (0 to 0) | -23.8% (-34.4% to -12.9%) |
| 21 | Uzbekistan | Physical violence by sharp object               | 0 (0 to 0) | 0 (0 to 0) | -38.7% (-48.5% to -29.5%) |
| 22 | Uzbekistan | Poisoning by carbon monoxide                    | 0 (0 to 0) | 0 (0 to 0) | 23.6% (12.7% to 35.5%)    |
| 23 | Uzbekistan | Poisoning by other means                        | 0 (0 to 0) | 0 (0 to 0) | -2.1% (-7.8% to 5.5%)     |
| 24 | Uzbekistan | Pulmonary aspiration and foreign body in airway | 0 (0 to 0) | 0 (0 to 0) | -11.2% (-18.4% to -3.9%)  |
| 25 | Uzbekistan | Self-harm by firearm                            | 0 (0 to 0) | 0 (0 to 0) | 20.4% (1.1% to 45.7%)     |
| 26 | Uzbekistan | Self-harm by other specified means              | 0 (0 to 0) | 0 (0 to 1) | 73% (59.8% to 85.6%)      |
| 27 | Uzbekistan | Unintentional firearm injuries                  | 0 (0 to 0) | 0 (0 to 0) | 4.4% (-3.4% to 13.5%)     |
| 28 | Uzbekistan | Venomous animal contact                         | 0 (0 to 0) | 0 (0 to 0) | -11.7% (-17.1% to -5.7%)  |
| 29 | Vanuatu    | Adverse effects of medical treatment            | 0 (0 to 0) | 0 (0 to 0) | 0% (0% to 0%)             |
| 30 | Vanuatu    | Conflict and terrorism                          | 0 (0 to 0) | 0 (0 to 0) | NA                        |
| 31 | Vanuatu    | Cyclist road injuries                           | 0 (0 to 0) | 0 (0 to 0) | 6.1% (-0.9% to 13.5%)     |
| 32 | Vanuatu    | Drowning                                        | 0 (0 to 0) | 0 (0 to 0) | -0.2% (-8.3% to 9.3%)     |
| 33 | Vanuatu    | Environmental heat and cold exposure            | 0 (0 to 0) | 0 (0 to 0) | -4.3% (-9.2% to 0.5%)     |
| 34 | Vanuatu    | Executions and police conflict                  | 0 (0 to 0) | 0 (0 to 0) | NA                        |
| 35 | Vanuatu    | Exposure to forces of nature                    | 0 (0 to 0) | 0 (0 to 0) | NA                        |
| 36 | Vanuatu    | Falls                                           | 1 (1 to 1) | 1 (1 to 2) | 38.6% (33% to 44.3%)      |
| 37 | Vanuatu    | Fire, heat, and hot substances                  | 0 (0 to 0) | 0 (0 to 0) | -4.7% (-9.1% to 0.1%)     |
| 38 | Vanuatu    | Foreign body in eyes                            | 0 (0 to 0) | 0 (0 to 0) | 0% (0% to 0%)             |
| 39 | Vanuatu    | Foreign body in other body part                 | 0 (0 to 0) | 0 (0 to 0) | -4.3% (-7.7% to -0.9%)    |
| 40 | Vanuatu    | Motor vehicle road injuries                     | 0 (0 to 1) | 0 (0 to 1) | -0.3% (-7.4% to 6.6%)     |
| 41 | Vanuatu    | Motorcyclist road injuries                      | 0 (0 to 0) | 0 (0 to 0) | 15.7% (5.9% to 26.6%)     |
| 42 | Vanuatu    | Non-venomous animal contact                     | 0 (0 to 0) | 0 (0 to 0) | -15.3% (-19.2% to -11.2%) |
| 43 | Vanuatu    | Other exposure to mechanical forces             | 0 (0 to 0) | 0 (0 to 0) | -13.9% (-19.7% to -7.9%)  |
| 44 | Vanuatu    | Other road injuries                             | 0 (0 to 0) | 0 (0 to 0) | 3.1% (-6% to 12.4%)       |
| 45 |            |                                                 |            |            |                           |
| 46 |            |                                                 |            |            |                           |

|    |                                    |                                                 |            |            |                           |
|----|------------------------------------|-------------------------------------------------|------------|------------|---------------------------|
| 1  |                                    |                                                 |            |            |                           |
| 2  | Vanuatu                            | Other transport injuries                        | 0 (0 to 0) | 0 (0 to 0) | -6.3% (-10.1% to -2.2%)   |
| 3  | Vanuatu                            | Other unintentional injuries                    | 0 (0 to 0) | 0 (0 to 0) | -7% (-11% to -2.5%)       |
| 4  | Vanuatu                            | Pedestrian road injuries                        | 0 (0 to 0) | 0 (0 to 0) | 7.3% (-0.4% to 15.2%)     |
| 5  | Vanuatu                            | Physical violence by firearm                    | 0 (0 to 0) | 0 (0 to 0) | 14.2% (4.3% to 25.6%)     |
| 6  | Vanuatu                            | Physical violence by other means                | 0 (0 to 0) | 0 (0 to 0) | 3.1% (-2.3% to 9.7%)      |
| 7  | Vanuatu                            | Physical violence by sharp object               | 0 (0 to 0) | 0 (0 to 0) | -6.2% (-14% to 1.3%)      |
| 8  | Vanuatu                            | Poisoning by carbon monoxide                    | 0 (0 to 0) | 0 (0 to 0) | 1.6% (-8.8% to 11.5%)     |
| 9  | Vanuatu                            | Poisoning by other means                        | 0 (0 to 0) | 0 (0 to 0) | -17.1% (-23.3% to -10.7%) |
| 10 | Vanuatu                            | Pulmonary aspiration and foreign body in airway | 0 (0 to 0) | 0 (0 to 0) | 1% (-9.9% to 12.7%)       |
| 11 | Vanuatu                            | Self-harm by firearm                            | 0 (0 to 0) | 0 (0 to 0) | -2.5% (-18.1% to 14.3%)   |
| 12 | Vanuatu                            | Self-harm by other specified means              | 0 (0 to 0) | 0 (0 to 0) | 2.6% (-3.7% to 9.5%)      |
| 13 | Vanuatu                            | Unintentional firearm injuries                  | 0 (0 to 0) | 0 (0 to 0) | -23.5% (-29.4% to -18%)   |
| 14 | Vanuatu                            | Venomous animal contact                         | 0 (0 to 0) | 0 (0 to 0) | -8.8% (-15.3% to -1.7%)   |
| 15 | Venezuela (Bolivarian Republic of) | Adverse effects of medical treatment            | 0 (0 to 0) | 0 (0 to 0) | 0% (0% to 0%)             |
| 16 | Venezuela (Bolivarian Republic of) | Conflict and terrorism                          | 0 (0 to 0) | 0 (0 to 0) | NA                        |
| 17 | Venezuela (Bolivarian Republic of) | Cyclist road injuries                           | 0 (0 to 1) | 0 (0 to 0) | -32.9% (-41.1% to -24.2%) |
| 18 | Venezuela (Bolivarian Republic of) | Drowning                                        | 0 (0 to 0) | 0 (0 to 0) | 23.1% (5.1% to 41.7%)     |
| 19 | Venezuela (Bolivarian Republic of) | Environmental heat and cold exposure            | 0 (0 to 0) | 0 (0 to 0) | 0.3% (-4% to 4.2%)        |
| 20 | Venezuela (Bolivarian Republic of) | Executions and police conflict                  | 0 (0 to 0) | 0 (0 to 0) | NA                        |
| 21 | Venezuela (Bolivarian Republic of) | Exposure to forces of nature                    | 0 (0 to 0) | 0 (0 to 0) | NA                        |
| 22 | Venezuela (Bolivarian Republic of) | Falls                                           | 2 (2 to 3) | 2 (2 to 3) | -7.4% (-11.8% to -2.9%)   |
| 23 | Venezuela (Bolivarian Republic of) | Fire, heat, and hot substances                  | 0 (0 to 0) | 0 (0 to 0) | -7.5% (-12.3% to -1.8%)   |
| 24 | Venezuela (Bolivarian Republic of) | Foreign body in eyes                            | 0 (0 to 0) | 0 (0 to 0) | 0% (0% to 0%)             |
| 25 | Venezuela (Bolivarian Republic of) | Foreign body in other body part                 | 0 (0 to 0) | 0 (0 to 0) | -14% (-18.8% to -10%)     |
| 26 | Venezuela (Bolivarian Republic of) | Motor vehicle road injuries                     | 1 (0 to 2) | 1 (0 to 1) | -17.5% (-26.8% to -7.3%)  |
| 27 | Venezuela (Bolivarian Republic of) | Motorcyclist road injuries                      | 0 (0 to 0) | 0 (0 to 0) | 9.3% (-5.3% to 26.3%)     |
| 28 | Venezuela (Bolivarian Republic of) | Non-venomous animal contact                     | 0 (0 to 0) | 0 (0 to 0) | -13.8% (-18.5% to -9.5%)  |
| 29 | Venezuela (Bolivarian Republic of) | Other exposure to mechanical forces             | 0 (0 to 1) | 0 (0 to 1) | 6.4% (-1.3% to 15.9%)     |
| 30 | Venezuela (Bolivarian Republic of) | Other road injuries                             | 0 (0 to 0) | 0 (0 to 0) | -23.7% (-33.4% to -13.3%) |
| 31 | Venezuela (Bolivarian Republic of) | Other transport injuries                        | 0 (0 to 0) | 0 (0 to 0) | 5.3% (0.2% to 11.4%)      |
| 32 | Venezuela (Bolivarian Republic of) | Other unintentional injuries                    | 0 (0 to 0) | 0 (0 to 0) | -20% (-25.4% to -14.1%)   |
| 33 | Venezuela (Bolivarian Republic of) | Pedestrian road injuries                        | 0 (0 to 1) | 0 (0 to 1) | -41.9% (-49.1% to -34.7%) |
| 34 | Venezuela (Bolivarian Republic of) | Physical violence by firearm                    | 0 (0 to 0) | 1 (0 to 1) | 222.6% (148.7% to 336.3%) |
| 35 | Venezuela (Bolivarian Republic of) | Physical violence by other means                | 0 (0 to 0) | 0 (0 to 0) | 22.9% (2.4% to 48%)       |
| 36 | Venezuela (Bolivarian Republic of) | Physical violence by sharp object               | 0 (0 to 0) | 0 (0 to 0) | -11.6% (-30.8% to 7.2%)   |
| 37 | Venezuela (Bolivarian Republic of) | Poisoning by carbon monoxide                    | 0 (0 to 0) | 0 (0 to 0) | 17.1% (5.2% to 30.5%)     |
| 38 | Venezuela (Bolivarian Republic of) | Poisoning by other means                        | 0 (0 to 0) | 0 (0 to 0) | -9.4% (-16.2% to -1.6%)   |
| 39 | Venezuela (Bolivarian Republic of) | Pulmonary aspiration and foreign body in airway | 0 (0 to 0) | 0 (0 to 0) | -29.8% (-37.3% to -21.4%) |
| 40 | Venezuela (Bolivarian Republic of) | Self-harm by firearm                            | 0 (0 to 0) | 0 (0 to 0) | 39.9% (24.7% to 60.4%)    |
| 41 | Venezuela (Bolivarian Republic of) | Self-harm by other specified means              | 0 (0 to 0) | 0 (0 to 0) | 26.2% (15.2% to 36.4%)    |
| 42 | Venezuela (Bolivarian Republic of) | Unintentional firearm injuries                  | 0 (0 to 1) | 0 (0 to 1) | 11.7% (0.3% to 25.4%)     |
| 43 | Venezuela (Bolivarian Republic of) | Venomous animal contact                         | 0 (0 to 0) | 0 (0 to 0) | -7.4% (-12.3% to -1.4%)   |
| 44 | Viet Nam                           | Adverse effects of medical treatment            | 0 (0 to 0) | 0 (0 to 0) | 0% (0% to 0%)             |
| 45 |                                    |                                                 |            |            |                           |
| 46 |                                    |                                                 |            |            |                           |

|    |          |                                                 |            |              |                           |
|----|----------|-------------------------------------------------|------------|--------------|---------------------------|
| 1  |          |                                                 |            |              |                           |
| 2  | Viet Nam | Conflict and terrorism                          | 0 (0 to 0) | 0 (0 to 0)   | NA                        |
| 3  | Viet Nam | Cyclist road injuries                           | 0 (0 to 0) | 0 (0 to 0)   | 38.1% (26.5% to 50.7%)    |
| 4  | Viet Nam | Drowning                                        | 0 (0 to 0) | 0 (0 to 0)   | 40.9% (23.7% to 59.3%)    |
| 5  | Viet Nam | Environmental heat and cold exposure            | 0 (0 to 0) | 0 (0 to 0)   | 1.1% (-4.5% to 6.2%)      |
| 6  | Viet Nam | Executions and police conflict                  | 0 (0 to 0) | 0 (0 to 0)   | NA                        |
| 7  | Viet Nam | Exposure to forces of nature                    | 0 (0 to 0) | 0 (0 to 0)   | NA                        |
| 8  | Viet Nam | Falls                                           | 2 (1 to 2) | 3 (2 to 4)   | 67.6% (61% to 74.1%)      |
| 9  | Viet Nam | Fire, heat, and hot substances                  | 0 (0 to 0) | 0 (0 to 0)   | 14.4% (7.4% to 21.9%)     |
| 10 | Viet Nam | Foreign body in eyes                            | 0 (0 to 0) | 0 (0 to 0)   | 0% (0% to 0%)             |
| 11 | Viet Nam | Foreign body in other body part                 | 0 (0 to 0) | 0 (0 to 0)   | 3.5% (-2.5% to 10.4%)     |
| 12 | Viet Nam | Motor vehicle road injuries                     | 1 (0 to 1) | 1 (0 to 1)   | 24.4% (14.1% to 35.5%)    |
| 13 | Viet Nam | Motorcyclist road injuries                      | 1 (0 to 1) | 1 (0 to 1)   | 42.5% (30.3% to 57%)      |
| 14 | Viet Nam | Non-venomous animal contact                     | 0 (0 to 0) | 0 (0 to 0)   | -27.4% (-32% to -21.7%)   |
| 15 | Viet Nam | Other exposure to mechanical forces             | 0 (0 to 1) | 0 (0 to 0)   | -11.5% (-17.7% to -3%)    |
| 16 | Viet Nam | Other road injuries                             | 0 (0 to 0) | 0 (0 to 0)   | 23% (12% to 37.1%)        |
| 17 | Viet Nam | Other transport injuries                        | 0 (0 to 0) | 0 (0 to 0)   | 2.1% (-2.9% to 7.1%)      |
| 18 | Viet Nam | Other unintentional injuries                    | 0 (0 to 0) | 0 (0 to 0)   | -26.8% (-31.3% to -21.7%) |
| 19 | Viet Nam | Pedestrian road injuries                        | 0 (0 to 0) | 0 (0 to 0)   | -14.7% (-22.2% to -7.1%)  |
| 20 | Viet Nam | Physical violence by firearm                    | 0 (0 to 0) | 0 (0 to 0)   | 131.5% (103.1% to 167.3%) |
| 21 | Viet Nam | Physical violence by other means                | 0 (0 to 0) | 0 (0 to 0)   | 3.1% (-4.7% to 12.7%)     |
| 22 | Viet Nam | Physical violence by sharp object               | 0 (0 to 0) | 0 (0 to 0)   | -24.8% (-34.2% to -15.8%) |
| 23 | Viet Nam | Poisoning by carbon monoxide                    | 0 (0 to 0) | 0 (0 to 0)   | 11.4% (0.7% to 23.7%)     |
| 24 | Viet Nam | Poisoning by other means                        | 0 (0 to 0) | 0 (0 to 0)   | -31.4% (-38.8% to -23%)   |
| 25 | Viet Nam | Pulmonary aspiration and foreign body in airway | 0 (0 to 0) | 0 (0 to 0)   | -21.7% (-28.4% to -13.7%) |
| 26 | Viet Nam | Self-harm by firearm                            | 0 (0 to 0) | 0 (0 to 0)   | 89% (63.8% to 127.1%)     |
| 27 | Viet Nam | Self-harm by other specified means              | 0 (0 to 0) | 0 (0 to 0)   | 5.6% (-0.1% to 12.9%)     |
| 28 | Viet Nam | Unintentional firearm injuries                  | 0 (0 to 0) | 0 (0 to 0)   | -31.3% (-39.5% to -23.8%) |
| 29 | Viet Nam | Venomous animal contact                         | 0 (0 to 0) | 0 (0 to 0)   | -30.8% (-38.5% to -22.7%) |
| 30 | Yemen    | Adverse effects of medical treatment            | 0 (0 to 0) | 0 (0 to 0)   | 0% (0% to 0%)             |
| 31 | Yemen    | Conflict and terrorism                          | 0 (0 to 0) | 22 (5 to 66) | NA                        |
| 32 | Yemen    | Cyclist road injuries                           | 0 (0 to 0) | 0 (0 to 0)   | -0.2% (-7.8% to 8.9%)     |
| 33 | Yemen    | Drowning                                        | 0 (0 to 0) | 0 (0 to 0)   | -21.5% (-29.1% to -11.9%) |
| 34 | Yemen    | Environmental heat and cold exposure            | 0 (0 to 0) | 0 (0 to 0)   | 0.6% (-4.3% to 5.6%)      |
| 35 | Yemen    | Executions and police conflict                  | 0 (0 to 0) | 0 (0 to 0)   | NA                        |
| 36 | Yemen    | Exposure to forces of nature                    | 0 (0 to 0) | 0 (0 to 0)   | NA                        |
| 37 | Yemen    | Falls                                           | 1 (1 to 2) | 2 (1 to 2)   | 18% (13.7% to 22.5%)      |
| 38 | Yemen    | Fire, heat, and hot substances                  | 0 (0 to 0) | 0 (0 to 0)   | -32.9% (-38% to -28.1%)   |
| 39 | Yemen    | Foreign body in eyes                            | 0 (0 to 0) | 0 (0 to 0)   | 0% (0% to 0%)             |
| 40 | Yemen    | Foreign body in other body part                 | 0 (0 to 0) | 0 (0 to 0)   | -1.3% (-5.1% to 2.2%)     |
| 41 | Yemen    | Motor vehicle road injuries                     | 1 (0 to 1) | 1 (0 to 1)   | -16% (-21.6% to -9.7%)    |
| 42 | Yemen    | Motorcyclist road injuries                      | 0 (0 to 0) | 0 (0 to 0)   | -18.9% (-26.8% to -10.1%) |
| 43 | Yemen    | Non-venomous animal contact                     | 0 (0 to 0) | 0 (0 to 0)   | 7.3% (2.6% to 11.8%)      |
| 44 | Yemen    | Other exposure to mechanical forces             | 0 (0 to 1) | 0 (0 to 0)   | -15% (-20.3% to -9.6%)    |
| 45 |          |                                                 |            |              |                           |
| 46 |          |                                                 |            |              |                           |

|    |        |                                                 |            |            |                           |
|----|--------|-------------------------------------------------|------------|------------|---------------------------|
| 1  |        |                                                 |            |            |                           |
| 2  | Yemen  | Other road injuries                             | 0 (0 to 0) | 0 (0 to 0) | 3.3% (-6.2% to 13.7%)     |
| 3  | Yemen  | Other transport injuries                        | 0 (0 to 0) | 0 (0 to 0) | -0.4% (-4.8% to 4.3%)     |
| 4  | Yemen  | Other unintentional injuries                    | 0 (0 to 0) | 0 (0 to 0) | -22.7% (-26.5% to -19%)   |
| 5  | Yemen  | Pedestrian road injuries                        | 0 (0 to 1) | 0 (0 to 0) | -14.6% (-21.6% to -7.2%)  |
| 6  | Yemen  | Physical violence by firearm                    | 0 (0 to 0) | 0 (0 to 0) | 99.7% (74.8% to 131.9%)   |
| 7  | Yemen  | Physical violence by other means                | 0 (0 to 0) | 0 (0 to 0) | 33.5% (22.3% to 47.9%)    |
| 8  | Yemen  | Physical violence by sharp object               | 0 (0 to 0) | 0 (0 to 0) | -8.5% (-18.7% to 2.4%)    |
| 9  | Yemen  | Poisoning by carbon monoxide                    | 0 (0 to 0) | 0 (0 to 0) | 14.6% (-0.2% to 31.1%)    |
| 10 | Yemen  | Poisoning by other means                        | 0 (0 to 0) | 0 (0 to 0) | -30.7% (-37.5% to -23%)   |
| 11 | Yemen  | Pulmonary aspiration and foreign body in airway | 0 (0 to 0) | 0 (0 to 0) | -13.3% (-21.4% to -3.2%)  |
| 12 | Yemen  | Self-harm by firearm                            | 0 (0 to 0) | 0 (0 to 0) | 21.6% (8% to 36.4%)       |
| 13 | Yemen  | Self-harm by other specified means              | 0 (0 to 0) | 0 (0 to 0) | 7.3% (1.5% to 13.5%)      |
| 14 | Yemen  | Unintentional firearm injuries                  | 0 (0 to 0) | 0 (0 to 0) | -17.6% (-24.5% to -10.6%) |
| 15 | Yemen  | Venomous animal contact                         | 0 (0 to 0) | 0 (0 to 0) | 8.6% (1.6% to 16.5%)      |
| 16 | Zambia | Adverse effects of medical treatment            | 0 (0 to 0) | 0 (0 to 0) | 0% (0% to 0%)             |
| 17 | Zambia | Conflict and terrorism                          | 0 (0 to 1) | 0 (0 to 0) | NA                        |
| 18 | Zambia | Cyclist road injuries                           | 1 (1 to 3) | 1 (1 to 3) | 1.7% (-5.1% to 9.1%)      |
| 19 | Zambia | Drowning                                        | 0 (0 to 0) | 0 (0 to 0) | -3.3% (-12% to 6.2%)      |
| 20 | Zambia | Environmental heat and cold exposure            | 0 (0 to 0) | 0 (0 to 0) | -7.9% (-14% to -1.2%)     |
| 21 | Zambia | Executions and police conflict                  | 0 (0 to 0) | 0 (0 to 0) | NA                        |
| 22 | Zambia | Exposure to forces of nature                    | 0 (0 to 0) | 0 (0 to 0) | NA                        |
| 23 | Zambia | Falls                                           | 4 (2 to 5) | 4 (3 to 6) | 25.5% (20.7% to 30.1%)    |
| 24 | Zambia | Fire, heat, and hot substances                  | 0 (0 to 0) | 0 (0 to 0) | -16.2% (-20.7% to -11%)   |
| 25 | Zambia | Foreign body in eyes                            | 0 (0 to 0) | 0 (0 to 0) | 0% (0% to 0%)             |
| 26 | Zambia | Foreign body in other body part                 | 1 (0 to 1) | 1 (0 to 1) | 3.2% (-0.5% to 7.5%)      |
| 27 | Zambia | Motor vehicle road injuries                     | 1 (0 to 1) | 1 (0 to 1) | -0.6% (-8.9% to 8.6%)     |
| 28 | Zambia | Motorcyclist road injuries                      | 0 (0 to 1) | 0 (0 to 1) | -11.2% (-18.6% to -3.3%)  |
| 29 | Zambia | Non-venomous animal contact                     | 0 (0 to 1) | 0 (0 to 1) | -21.2% (-25.3% to -16.7%) |
| 30 | Zambia | Other exposure to mechanical forces             | 0 (0 to 0) | 0 (0 to 0) | -12.8% (-18.2% to -6.8%)  |
| 31 | Zambia | Other road injuries                             | 0 (0 to 0) | 0 (0 to 0) | 15.5% (4.7% to 26.6%)     |
| 32 | Zambia | Other transport injuries                        | 0 (0 to 1) | 0 (0 to 1) | -16.5% (-20.7% to -12.7%) |
| 33 | Zambia | Other unintentional injuries                    | 0 (0 to 0) | 0 (0 to 0) | -18.2% (-24.4% to -11.2%) |
| 34 | Zambia | Pedestrian road injuries                        | 2 (1 to 3) | 1 (1 to 3) | -8% (-14% to -1.1%)       |
| 35 | Zambia | Physical violence by firearm                    | 0 (0 to 0) | 0 (0 to 0) | 88.4% (68.4% to 110%)     |
| 36 | Zambia | Physical violence by other means                | 0 (0 to 0) | 0 (0 to 0) | 52.3% (37% to 67.8%)      |
| 37 | Zambia | Physical violence by sharp object               | 0 (0 to 0) | 0 (0 to 0) | 61.2% (39.4% to 82.7%)    |
| 38 | Zambia | Poisoning by carbon monoxide                    | 0 (0 to 0) | 0 (0 to 0) | 18.9% (5.1% to 32.7%)     |
| 39 | Zambia | Poisoning by other means                        | 0 (0 to 0) | 0 (0 to 0) | -24.4% (-32.2% to -16.5%) |
| 40 | Zambia | Pulmonary aspiration and foreign body in airway | 0 (0 to 0) | 0 (0 to 0) | -12.7% (-23.4% to -0.6%)  |
| 41 | Zambia | Self-harm by firearm                            | 0 (0 to 0) | 0 (0 to 0) | 35.8% (20.9% to 58.1%)    |
| 42 | Zambia | Self-harm by other specified means              | 0 (0 to 0) | 0 (0 to 0) | 7.7% (1.1% to 15%)        |
| 43 | Zambia | Unintentional firearm injuries                  | 0 (0 to 0) | 0 (0 to 0) | -24% (-31.5% to -16.4%)   |
| 44 | Zambia | Venomous animal contact                         | 0 (0 to 0) | 0 (0 to 0) | -26.5% (-34.9% to -17.9%) |
| 45 |        |                                                 |            |            |                           |
| 46 |        |                                                 |            |            |                           |

|    |          |                                                 |            |            |                           |
|----|----------|-------------------------------------------------|------------|------------|---------------------------|
| 1  |          |                                                 |            |            |                           |
| 2  | Zimbabwe | Adverse effects of medical treatment            | 0 (0 to 0) | 0 (0 to 0) | 0% (0% to 0%)             |
| 3  | Zimbabwe | Conflict and terrorism                          | 0 (0 to 0) | 0 (0 to 0) | NA                        |
| 4  | Zimbabwe | Cyclist road injuries                           | 0 (0 to 1) | 1 (0 to 1) | 26% (11.1% to 44.3%)      |
| 5  | Zimbabwe | Drowning                                        | 0 (0 to 0) | 0 (0 to 0) | -18.8% (-24.9% to -12.7%) |
| 6  | Zimbabwe | Environmental heat and cold exposure            | 0 (0 to 0) | 0 (0 to 0) | -1.4% (-7.2% to 4.5%)     |
| 7  | Zimbabwe | Executions and police conflict                  | 0 (0 to 0) | 0 (0 to 0) | NA                        |
| 8  | Zimbabwe | Exposure to forces of nature                    | 0 (0 to 0) | 1 (1 to 3) | NA                        |
| 9  | Zimbabwe | Falls                                           | 3 (2 to 4) | 3 (2 to 4) | -0.4% (-3.7% to 3.1%)     |
| 10 | Zimbabwe | Fire, heat, and hot substances                  | 0 (0 to 0) | 0 (0 to 0) | 6.6% (0.5% to 12.5%)      |
| 11 | Zimbabwe | Foreign body in eyes                            | 0 (0 to 0) | 0 (0 to 0) | 0% (0% to 0%)             |
| 12 | Zimbabwe | Foreign body in other body part                 | 1 (1 to 1) | 1 (0 to 1) | -5.1% (-8.6% to -1%)      |
| 13 | Zimbabwe | Motor vehicle road injuries                     | 1 (0 to 1) | 1 (0 to 1) | 23.2% (9% to 40.8%)       |
| 14 | Zimbabwe | Motorcyclist road injuries                      | 0 (0 to 1) | 0 (0 to 0) | -19.6% (-29.2% to -8.7%)  |
| 15 | Zimbabwe | Non-venomous animal contact                     | 0 (0 to 0) | 0 (0 to 1) | 6% (0.9% to 10.9%)        |
| 16 | Zimbabwe | Other exposure to mechanical forces             | 0 (0 to 0) | 0 (0 to 0) | -8.7% (-13.1% to -3.7%)   |
| 17 | Zimbabwe | Other road injuries                             | 0 (0 to 0) | 0 (0 to 0) | 41.8% (22.2% to 69.3%)    |
| 18 | Zimbabwe | Other transport injuries                        | 0 (0 to 1) | 1 (0 to 1) | 24.1% (17.8% to 30.8%)    |
| 19 | Zimbabwe | Other unintentional injuries                    | 0 (0 to 0) | 0 (0 to 0) | -7.1% (-10.9% to -2.6%)   |
| 20 | Zimbabwe | Pedestrian road injuries                        | 2 (1 to 3) | 1 (0 to 2) | -34.7% (-42.2% to -28%)   |
| 21 | Zimbabwe | Physical violence by firearm                    | 0 (0 to 0) | 0 (0 to 0) | -4.8% (-15.7% to 6.1%)    |
| 22 | Zimbabwe | Physical violence by other means                | 0 (0 to 0) | 0 (0 to 0) | 2.8% (-5.7% to 13.7%)     |
| 23 | Zimbabwe | Physical violence by sharp object               | 0 (0 to 0) | 0 (0 to 0) | 9.2% (-2.1% to 22%)       |
| 24 | Zimbabwe | Poisoning by carbon monoxide                    | 0 (0 to 0) | 0 (0 to 0) | -10.6% (-19.5% to 0.5%)   |
| 25 | Zimbabwe | Poisoning by other means                        | 0 (0 to 0) | 0 (0 to 0) | -7.5% (-13.2% to -1.4%)   |
| 26 | Zimbabwe | Pulmonary aspiration and foreign body in airway | 0 (0 to 0) | 0 (0 to 0) | 10.7% (3% to 18.3%)       |
| 27 | Zimbabwe | Self-harm by firearm                            | 0 (0 to 0) | 0 (0 to 0) | 7.9% (-7.9% to 21.6%)     |
| 28 | Zimbabwe | Self-harm by other specified means              | 0 (0 to 0) | 0 (0 to 0) | 30.6% (24.3% to 37.1%)    |
| 29 | Zimbabwe | Unintentional firearm injuries                  | 0 (0 to 0) | 0 (0 to 0) | -5.8% (-12.8% to 1.9%)    |
| 30 | Zimbabwe | Venomous animal contact                         | 0 (0 to 0) | 0 (0 to 0) | 16.5% (8.6% to 25.3%)     |

Abbreviations: UI, uncertainty interval; NA, not applicable

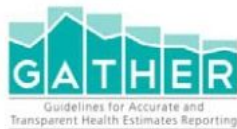

## Checklist of information that should be included in new reports of global health estimates

| Item #                                                                                                | Checklist item                                                                                                                                                                                                                                                                                                                                                                            | Reported on page #                                                                                                                                                                                                                 |
|-------------------------------------------------------------------------------------------------------|-------------------------------------------------------------------------------------------------------------------------------------------------------------------------------------------------------------------------------------------------------------------------------------------------------------------------------------------------------------------------------------------|------------------------------------------------------------------------------------------------------------------------------------------------------------------------------------------------------------------------------------|
| <b>Objectives and funding</b>                                                                         |                                                                                                                                                                                                                                                                                                                                                                                           |                                                                                                                                                                                                                                    |
| 1                                                                                                     | Define the indicator(s), populations (including age, sex, and geographic entities), and time period(s) for which estimates were made.                                                                                                                                                                                                                                                     | Main Pg. 5-10                                                                                                                                                                                                                      |
| 2                                                                                                     | List the funding sources for the work.                                                                                                                                                                                                                                                                                                                                                    | Main Pg. 22                                                                                                                                                                                                                        |
| <b>Data Inputs</b>                                                                                    |                                                                                                                                                                                                                                                                                                                                                                                           |                                                                                                                                                                                                                                    |
| <i>For all data inputs from multiple sources that are synthesized as part of the study:</i>           |                                                                                                                                                                                                                                                                                                                                                                                           |                                                                                                                                                                                                                                    |
| 3                                                                                                     | Describe how the data were identified and how the data were accessed.                                                                                                                                                                                                                                                                                                                     | Main Pg. 5-10                                                                                                                                                                                                                      |
| 4                                                                                                     | Specify the inclusion and exclusion criteria. Identify all ad-hoc exclusions.                                                                                                                                                                                                                                                                                                             | Main Pg. 6-7<br><a href="https://ghdx.healthdata.org/gbd-2019/data-input-sources">https://ghdx.healthdata.org/gbd-2019/data-input-sources</a>                                                                                      |
| 5                                                                                                     | Provide information on all included data sources and their main characteristics. For each data source used, report reference information or contact name/institution, population represented, data collection method, year(s) of data collection, sex and age range, diagnostic criteria or measurement method, and sample size, as relevant.                                             | Main Pg. 6-7<br><a href="https://ghdx.healthdata.org/gbd-2019/data-input-sources">https://ghdx.healthdata.org/gbd-2019/data-input-sources</a>                                                                                      |
| 6                                                                                                     | Identify and describe any categories of input data that have potentially important biases (e.g., based on characteristics listed in item 5).                                                                                                                                                                                                                                              | <a href="https://ghdx.healthdata.org/gbd-2019/data-input-sources">https://ghdx.healthdata.org/gbd-2019/data-input-sources</a><br><a href="https://ghdx.healthdata.org/gbd-2019/code">https://ghdx.healthdata.org/gbd-2019/code</a> |
| <i>For data inputs that contribute to the analysis but were not synthesized as part of the study:</i> |                                                                                                                                                                                                                                                                                                                                                                                           |                                                                                                                                                                                                                                    |
| 7                                                                                                     | Describe and give sources for any other data inputs.                                                                                                                                                                                                                                                                                                                                      | N/A                                                                                                                                                                                                                                |
| <i>For all data inputs:</i>                                                                           |                                                                                                                                                                                                                                                                                                                                                                                           |                                                                                                                                                                                                                                    |
| 8                                                                                                     | Provide all data inputs in a file format from which data can be efficiently extracted (e.g., a spreadsheet rather than a PDF), including all relevant meta-data listed in item 5. For any data inputs that cannot be shared because of ethical or legal reasons, such as third-party ownership, provide a contact name or the name of the institution that retains the right to the data. | <a href="https://ghdx.healthdata.org/gbd-2019/data-input-sources">https://ghdx.healthdata.org/gbd-2019/data-input-sources</a>                                                                                                      |
| <b>Data analysis</b>                                                                                  |                                                                                                                                                                                                                                                                                                                                                                                           |                                                                                                                                                                                                                                    |
| 9                                                                                                     | Provide a conceptual overview of the data analysis method. A diagram may be helpful.                                                                                                                                                                                                                                                                                                      | Main Pg. 9-10                                                                                                                                                                                                                      |

|                               |                                                                                                                                                                                                                                                                         |                                                                                                                    |
|-------------------------------|-------------------------------------------------------------------------------------------------------------------------------------------------------------------------------------------------------------------------------------------------------------------------|--------------------------------------------------------------------------------------------------------------------|
| 10                            | Provide a detailed description of all steps of the analysis, including mathematical formulae. This description should cover, as relevant, data cleaning, data pre-processing, data adjustments and weighting of data sources, and mathematical or statistical model(s). | Main Pg. 9-10<br><a href="https://ghdx.healthdata.org/gbd-2019/code">https://ghdx.healthdata.org/gbd-2019/code</a> |
| 11                            | Describe how candidate models were evaluated and how the final model(s) were selected.                                                                                                                                                                                  | N/A                                                                                                                |
| 12                            | Provide the results of an evaluation of model performance, if done, as well as the results of any relevant sensitivity analysis.                                                                                                                                        | N/A                                                                                                                |
| 13                            | Describe methods for calculating uncertainty of the estimates. State which sources of uncertainty were, and were not, accounted for in the uncertainty analysis.                                                                                                        | Main Pg. 8-9                                                                                                       |
| 14                            | State how analytic or statistical source code used to generate estimates can be accessed.                                                                                                                                                                               | <a href="https://ghdx.healthdata.org/gbd-2019/code">https://ghdx.healthdata.org/gbd-2019/code</a>                  |
| <b>Results and Discussion</b> |                                                                                                                                                                                                                                                                         |                                                                                                                    |
| 15                            | Provide published estimates in a file format from which data can be efficiently extracted.                                                                                                                                                                              | <a href="https://vizhub.healthdata.org/gbd-results/">https://vizhub.healthdata.org/gbd-results/</a>                |
| 16                            | Report a quantitative measure of the uncertainty of the estimates (e.g. uncertainty intervals).                                                                                                                                                                         | Main Pg. 10-13                                                                                                     |
| 17                            | Interpret results in light of existing evidence. If updating a previous set of estimates, describe the reasons for changes in estimates.                                                                                                                                | Main Pg. 13-17                                                                                                     |
| 18                            | Discuss limitations of the estimates. Include a discussion of any modelling assumptions or data limitations that affect interpretation of the estimates.                                                                                                                | Main Pg. 17-20                                                                                                     |

*This checklist should be used in conjunction with the GATHER statement and Explanation and Elaboration document, found on [gather-statement.org](http://gather-statement.org)*



**STROBE Statement—Checklist of items that should be included in reports of *cross-sectional studies***

|                              | <b>Item No</b> | <b>Recommendation</b>                                                                                                                                                                | <b>Page No</b>                                                                                                                                |
|------------------------------|----------------|--------------------------------------------------------------------------------------------------------------------------------------------------------------------------------------|-----------------------------------------------------------------------------------------------------------------------------------------------|
| <b>Title and abstract</b>    | 1              | (a) Indicate the study's design with a commonly used term in the title or the abstract                                                                                               | Main Pg. 2                                                                                                                                    |
|                              |                | (b) Provide in the abstract an informative and balanced summary of what was done and what was found                                                                                  | Main Pg. 2                                                                                                                                    |
| <b>Introduction</b>          |                |                                                                                                                                                                                      |                                                                                                                                               |
| Background/rationale         | 2              | Explain the scientific background and rationale for the investigation being reported                                                                                                 | Main Pg. 4-5                                                                                                                                  |
| Objectives                   | 3              | State specific objectives, including any prespecified hypotheses                                                                                                                     | Main Pg. 5                                                                                                                                    |
| <b>Methods</b>               |                |                                                                                                                                                                                      |                                                                                                                                               |
| Study design                 | 4              | Present key elements of study design early in the paper                                                                                                                              | Main Pg. 5-6                                                                                                                                  |
| Setting                      | 5              | Describe the setting, locations, and relevant dates, including periods of recruitment, exposure, follow-up, and data collection                                                      | Main Pg. 6-7<br><a href="https://ghdx.healthdata.org/gbd-2019/data-input-sources">https://ghdx.healthdata.org/gbd-2019/data-input-sources</a> |
| Participants                 | 6              | (a) Give the eligibility criteria, and the sources and methods of selection of participants                                                                                          | Main Pg. 6-7<br><a href="https://ghdx.healthdata.org/gbd-2019/data-input-sources">https://ghdx.healthdata.org/gbd-2019/data-input-sources</a> |
| Variables                    | 7              | Clearly define all outcomes, exposures, predictors, potential confounders, and effect modifiers. Give diagnostic criteria, if applicable                                             | Main Pg. 7-9<br><a href="https://vizhub.healthdata.org/gbd-results/">https://vizhub.healthdata.org/gbd-results/</a>                           |
| Data sources/<br>measurement | 8*             | For each variable of interest, give sources of data and details of methods of assessment (measurement). Describe comparability of assessment methods if there is more than one group | Main Pg. 6-7<br><a href="https://vizhub.healthdata.org/gbd-results/">https://vizhub.healthdata.org/gbd-results/</a>                           |
| Bias                         | 9              | Describe any efforts to address potential sources of bias                                                                                                                            | <a href="https://ghdx.healthdata.org/gbd-2019/data-input-sources">https://ghdx.healthdata.org/gbd-2019/data-input-sources</a>                 |

|                        |     |                                                                                                                                                                                                   |                                                                                                                                                                                                                                    |
|------------------------|-----|---------------------------------------------------------------------------------------------------------------------------------------------------------------------------------------------------|------------------------------------------------------------------------------------------------------------------------------------------------------------------------------------------------------------------------------------|
|                        |     |                                                                                                                                                                                                   | <a href="https://ghdx.healthdata.org/gbd-2019/code">https://ghdx.healthdata.org/gbd-2019/code</a>                                                                                                                                  |
| Study size             | 10  | Explain how the study size was arrived at                                                                                                                                                         | N/A                                                                                                                                                                                                                                |
| Quantitative variables | 11  | Explain how quantitative variables were handled in the analyses. If applicable, describe which groupings were chosen and why                                                                      | Main Pg. 7-9<br><a href="https://ghdx.healthdata.org/gbd-2019/code">https://ghdx.healthdata.org/gbd-2019/code</a>                                                                                                                  |
| Statistical methods    | 12  | (a) Describe all statistical methods, including those used to control for confounding                                                                                                             | Main Pg. 9-10<br><a href="https://ghdx.healthdata.org/gbd-2019/code">https://ghdx.healthdata.org/gbd-2019/code</a>                                                                                                                 |
|                        |     | (b) Describe any methods used to examine subgroups and interactions                                                                                                                               | N/A                                                                                                                                                                                                                                |
|                        |     | (c) Explain how missing data were addressed                                                                                                                                                       | N/A                                                                                                                                                                                                                                |
|                        |     | (d) If applicable, describe analytical methods taking account of sampling strategy                                                                                                                | N/A                                                                                                                                                                                                                                |
|                        |     | (e) Describe any sensitivity analyses                                                                                                                                                             | N/A                                                                                                                                                                                                                                |
| <b>Results</b>         |     |                                                                                                                                                                                                   |                                                                                                                                                                                                                                    |
| Participants           | 13* | (a) Report numbers of individuals at each stage of study—eg numbers potentially eligible, examined for eligibility, confirmed eligible, included in the study, completing follow-up, and analysed | <a href="https://ghdx.healthdata.org/gbd-2019/data-input-sources">https://ghdx.healthdata.org/gbd-2019/data-input-sources</a><br><a href="https://ghdx.healthdata.org/gbd-2019/code">https://ghdx.healthdata.org/gbd-2019/code</a> |
|                        |     | (b) Give reasons for non-participation at each stage                                                                                                                                              | <a href="https://ghdx.healthdata.org/gbd-2019/data-input-sources">https://ghdx.healthdata.org/gbd-2019/data-input-sources</a><br><a href="https://ghdx.healthdata.org/gbd-2019/code">https://ghdx.healthdata.org/gbd-2019/code</a> |
|                        |     | (c) Consider use of a flow diagram                                                                                                                                                                | <a href="https://ghdx.healthdata.org/gbd-2019/data-input-sources">https://ghdx.healthdata.org/gbd-2019/data-input-sources</a><br><a href="https://ghdx.healthdata.org/gbd-2019/code">https://ghdx.healthdata.org/gbd-2019/code</a> |
| Descriptive data       | 14* | (a) Give characteristics of study participants (eg demographic, clinical, social) and information on exposures and potential confounders                                                          | Main Pg. 10-13                                                                                                                                                                                                                     |

|                          |     |                                                                                                                                                                                                              |                |
|--------------------------|-----|--------------------------------------------------------------------------------------------------------------------------------------------------------------------------------------------------------------|----------------|
|                          |     | (b) Indicate number of participants with missing data for each variable of interest                                                                                                                          | N/A            |
| Outcome data             | 15* | Report numbers of outcome events or summary measures                                                                                                                                                         | Main Pg. 10-13 |
| Main results             | 16  | (a) Give unadjusted estimates and, if applicable, confounder-adjusted estimates and their precision (eg, 95% confidence interval). Make clear which confounders were adjusted for and why they were included | Main Pg. 10-13 |
|                          |     | (b) Report category boundaries when continuous variables were categorized                                                                                                                                    | N/A            |
|                          |     | (c) If relevant, consider translating estimates of relative risk into absolute risk for a meaningful time period                                                                                             | N/A            |
| Other analyses           | 17  | Report other analyses done—eg analyses of subgroups and interactions, and sensitivity analyses                                                                                                               | N/A            |
| <b>Discussion</b>        |     |                                                                                                                                                                                                              |                |
| Key results              | 18  | Summarise key results with reference to study objectives                                                                                                                                                     | Main Pg. 13-17 |
| Limitations              | 19  | Discuss limitations of the study, taking into account sources of potential bias or imprecision. Discuss both direction and magnitude of any potential bias                                                   | Main Pg. 17-20 |
| Interpretation           | 20  | Give a cautious overall interpretation of results considering objectives, limitations, multiplicity of analyses, results from similar studies, and other relevant evidence                                   | Main Pg. 20-22 |
| Generalisability         | 21  | Discuss the generalisability (external validity) of the study results                                                                                                                                        | Main Pg. 20-22 |
| <b>Other information</b> |     |                                                                                                                                                                                                              |                |
| Funding                  | 22  | Give the source of funding and                                                                                                                                                                               | Main Pg. 22    |

|                                                                                                                                |  |
|--------------------------------------------------------------------------------------------------------------------------------|--|
| the role of the funders for the present study and, if applicable, for the original study on which the present article is based |  |
|--------------------------------------------------------------------------------------------------------------------------------|--|

\*Give information separately for exposed and unexposed groups.

**Note:** An Explanation and Elaboration article discusses each checklist item and gives methodological background and published examples of transparent reporting. The STROBE checklist is best used in conjunction with this article (freely available on the Web sites of PLoS Medicine at <http://www.plosmedicine.org/>, Annals of Internal Medicine at <http://www.annals.org/>, and Epidemiology at <http://www.epidem.com/>). Information on the STROBE Initiative is available at [www.strobe-statement.org](http://www.strobe-statement.org).
