# Supplementary material for: Global, regional and national burden of traumatic brain injury and spinal cord injury, 1990–2019: a systematic analysis for the Global Burden of Disease Study 2019
Source: PubMed Central journal article supplement — BMJ Open. 2023 Oct 6;13(10):e075049. doi: 10.1136/bmjopen-2023-075049 (PMC10565269; doi:10.1136/bmjopen-2023-075049), 2023-10-06
Supplement: bmjopen-2023-075049supp003.pdf [file bmjopen-2023-075049supp003.pdf]

**eFigure 3. Years lived with disability of traumatic brain injury worldwide**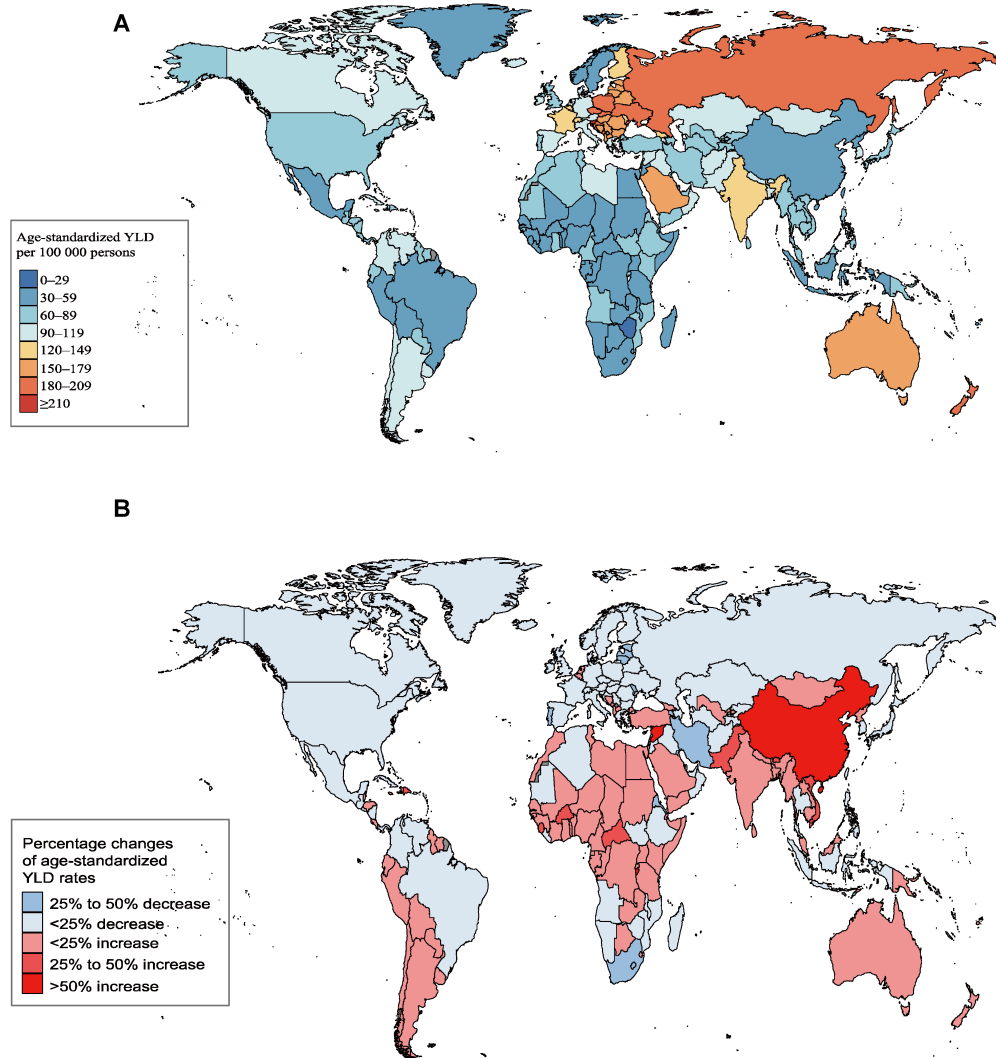

Age-standardized years lived with disability (YLDs) rates per 100,000 persons of traumatic brain injury (TBI) by location, 2019 (A); Percentage changes of age-standardized YLD rates of TBI, 1990–2019 (B)
