# Supplementary material for: Global, regional and national burden of traumatic brain injury and spinal cord injury, 1990–2019: a systematic analysis for the Global Burden of Disease Study 2019
Source: PubMed Central journal article supplement — BMJ Open. 2023 Oct 6;13(10):e075049. doi: 10.1136/bmjopen-2023-075049 (PMC10565269; doi:10.1136/bmjopen-2023-075049), 2023-10-06
Supplement: bmjopen-2023-075049supp008.pdf [file bmjopen-2023-075049supp008.pdf]

**eTable 1. Global Burden of Disease detailed data sources for estimates of non-fatal injuries burden from 204 countries and territories**

| Location            | Total number of data sources | Total number of metadata | Data source citation                                |
|---------------------|------------------------------|--------------------------|-----------------------------------------------------|
| Afghanistan         | 1                            | 7                        | Afghanistan Demographic and Health Survey 2015-2016 |
| Albania             | 2                            | 510                      | Albania Demographic and Health Survey 2008-2009     |
|                     |                              |                          | Albania Reproductive Health Survey 2002             |
| Algeria             | 0                            | 0                        |                                                     |
| American Samoa      | 0                            | 0                        |                                                     |
| Andorra             | 0                            | 0                        |                                                     |
| Angola              | 0                            | 0                        |                                                     |
| Antigua and Barbuda | 0                            | 0                        |                                                     |
| Argentina           | 0                            | 0                        |                                                     |
| Armenia             | 0                            | 0                        |                                                     |
| Australia           | 0                            | 0                        |                                                     |
| Austria             | 6                            | 240                      | Austria Hospital Inpatient Discharges 1989-1992     |
|                     |                              |                          | Austria Hospital Inpatient Discharges 1993-1997     |
|                     |                              |                          | Austria Hospital Inpatient Discharges 1998-2002     |
|                     |                              |                          | Austria Hospital Inpatient Discharges 2003-2007     |
|                     |                              |                          | Austria Hospital Inpatient Discharges 2008-2012     |
|                     |                              |                          | Austria Hospital Inpatient Discharges 2013-2014     |
| Azerbaijan          | 2                            | 10                       | Azerbaijan Demographic and Health Survey 2006       |
|                     |                              |                          | Azerbaijan Reproductive Health Survey 2001          |
| Bahamas             | 0                            | 0                        |                                                     |
| Bahrain             | 0                            | 0                        |                                                     |
| Bangladesh          | 3                            | 280                      | Bangladesh World Health Survey 2003                 |
|                     |                              |                          | Bangladesh Health and Injury Survey 2003            |
|                     |                              |                          | Bangladesh Demographic and Health Survey 2007       |
| Barbados            | 0                            | 0                        |                                                     |
| Belarus             | 0                            | 0                        |                                                     |
| Belgium             | 1                            | 2656                     | European Hospital Morbidity Database, 2008          |
| Belize              | 0                            | 0                        |                                                     |
| Benin               | 0                            | 0                        |                                                     |

|                                  |    |        |                                                                 |
|----------------------------------|----|--------|-----------------------------------------------------------------|
| Bermuda                          | 0  | 0      |                                                                 |
| Bhutan                           | 0  | 0      |                                                                 |
| Bolivia (Plurinational State of) | 1  | 15     | Bolivia Demographic and Health Survey 2008                      |
| Bosnia and Herzegovina           | 1  | 140    | Bosnia and Herzegovina World Health Survey 2003                 |
| Botswana                         | 2  | 514    | Botswana AIDS Impact Survey 2013                                |
|                                  |    |        | Botswana Health Management Data System 2008-2009                |
| Brazil                           | 6  | 173640 | Brazil World Health Survey 2003                                 |
|                                  |    |        | Brazil Hospital Information System 1997                         |
|                                  |    |        | Brazil Hospital Information System 1998-2002                    |
|                                  |    |        | Brazil Hospital Information System 2003-2007                    |
|                                  |    |        | Brazil Hospital Information System 2008-2012                    |
|                                  |    |        | Brazil Hospital Information System 2013-2014                    |
| Brunei Darussalam                | 0  | 0      |                                                                 |
| Bulgaria                         | 0  | 0      |                                                                 |
| Burkina Faso                     | 2  | 167    | Burkina Faso Demographic and Health Survey 2010-2011            |
|                                  |    |        | Burkina Faso World Health Survey 2002-2003                      |
| Burundi                          | 0  | 0      |                                                                 |
| Cabo Verde                       | 0  | 0      |                                                                 |
| Cambodia                         | 3  | 40     | Cambodia Demographic and Health Survey 2000                     |
|                                  |    |        | Cambodia Demographic and Health Survey 2005-2006                |
|                                  |    |        | Cambodia Demographic and Health Survey 2014                     |
| Cameroon                         | 1  | 14     | Cameroon Demographic and Health Survey 2004                     |
| Canada                           | 0  | 0      |                                                                 |
| Central African Republic         | 1  | 7      | Central African Republic Multiple Indicator Cluster Survey 2006 |
| Chad                             | 2  | 177    | Chad World Health Survey 2003                                   |
|                                  |    |        | Chad Demographic and Health Survey 2014-2015                    |
| Chile                            | 3  | 3984   | Chile Hospital Discharges 2001-2002                             |
|                                  |    |        | Chile Hospital Discharges 2003-2007                             |
|                                  |    |        | Chile Hospital Discharges 2008-2012                             |
| China                            | 15 | 62053  | China World Health Survey 2002                                  |
|                                  |    |        | China Health and Family Life Survey 1999-2000                   |

|               |   |      |                                                                       |
|---------------|---|------|-----------------------------------------------------------------------|
|               |   |      | China WHO Study on Global AGEing and Adult Health 2007-2010           |
|               |   |      | Hong Kong Injury Survey 2008                                          |
|               |   |      | China National Injury Surveillance System 2006 - China CDC            |
|               |   |      | China National Injury Surveillance System 2007 - China CDC            |
|               |   |      | China National Injury Surveillance System 2008 - China CDC            |
|               |   |      | China National Injury Surveillance System 2009 - China CDC            |
|               |   |      | China National Injury Surveillance System 2010 - China CDC            |
|               |   |      | China National Injury Surveillance System 2011 - China CDC            |
|               |   |      | China National Injury Surveillance System 2012 - China CDC            |
|               |   |      | China National Injury Surveillance System 2013 - China CDC            |
|               |   |      | China National Injury Surveillance System 2014 - China CDC            |
|               |   |      | China Injury Comprehensive Surveillance Study 2009-2011 - China CDC   |
|               |   |      | Prevalence of and Risk Factors for Intimate Partner Violence in China |
| Colombia      | 2 | 397  | Colombia National Health Survey 2007-2008                             |
|               |   |      | Colombia Demographic and Health Survey 2009-2010                      |
| Comoros       | 2 | 162  | Comoros World Health Survey 2003                                      |
|               |   |      | Comoros Demographic and Health Survey 2012-2013                       |
| Congo         | 1 | 135  | Congo World Health Survey 2003                                        |
| Cook Islands  | 0 | 0    |                                                                       |
| Costa Rica    | 0 | 0    |                                                                       |
| Croatia       | 2 | 5467 | European Hospital Morbidity Database, 2008                            |
|               |   |      | Croatia World Health Survey 2003                                      |
| Cuba          | 0 | 0    |                                                                       |
| Cyprus        | 2 | 336  | European Hospital Morbidity Database, 2008                            |
|               |   |      | Cyprus European Health Interview Survey 2008                          |
| Czechia       | 3 | 1492 | European Hospital Morbidity Database, 2008                            |
|               |   |      | Czech Republic World Health Survey 2002-2003                          |
|               |   |      | Czech Republic European Health Interview Survey 2008                  |
| Côte d'Ivoire | 2 | 167  | Côte d'Ivoire World Health Survey 2003                                |
|               |   |      | Côte d'Ivoire Demographic and Health Survey 2011-2012                 |

|                                       |   |     |                                                                                                                      |
|---------------------------------------|---|-----|----------------------------------------------------------------------------------------------------------------------|
| Democratic People's Republic of Korea | 0 | 0   |                                                                                                                      |
| Democratic Republic of the Congo      | 1 | 7   | Democratic Republic of the Congo Demographic and Health Survey 2013-2014                                             |
| Denmark                               | 1 | 160 | European Hospital Morbidity Database, 2008                                                                           |
| Djibouti                              | 0 | 0   |                                                                                                                      |
| Dominica                              | 0 | 0   |                                                                                                                      |
| Dominican Republic                    | 4 | 191 | Dominican Republic Demographic and Health Survey 2002                                                                |
|                                       |   |     | Dominican Republic Demographic and Health Survey 2007                                                                |
|                                       |   |     | Dominican Republic World Health Survey 2003                                                                          |
|                                       |   |     | Dominican Republic Demographic and Health Survey 2013                                                                |
| Ecuador                               | 8 | 380 | Ecuador World Health Survey 2003                                                                                     |
|                                       |   |     | Ecuador Reproductive Health Survey 1999                                                                              |
|                                       |   |     | Ecuador Reproductive Health Survey 2004                                                                              |
|                                       |   |     | Ecuador Hospital Inpatient Discharges 1993-1997                                                                      |
|                                       |   |     | Ecuador Hospital Inpatient Discharges 1998-2002                                                                      |
|                                       |   |     | Ecuador Hospital Inpatient Discharges 2003-2007                                                                      |
|                                       |   |     | Ecuador Hospital Inpatient Discharges 2008-2012                                                                      |
|                                       |   |     | Ecuador Hospital Inpatient Discharges 2013-2014                                                                      |
| Egypt                                 | 2 | 14  | Egypt Demographic and Health Survey 2005                                                                             |
|                                       |   |     | Egypt Demographic and Health Survey 2014                                                                             |
| El Salvador                           | 2 | 14  | El Salvador Reproductive Health Survey 2002-2003                                                                     |
|                                       |   |     | El Salvador Reproductive Health Survey 2008                                                                          |
| Equatorial Guinea                     | 0 | 0   |                                                                                                                      |
| Eritrea                               | 0 | 0   |                                                                                                                      |
| Estonia                               | 2 | 151 | Estonia World Health Survey 2003                                                                                     |
|                                       |   |     | Intimate partner violence and sexual health outcomes: a population-based study among 16-44-year-old women in Estonia |
| Eswatini                              | 1 | 165 | Swaziland World Health Survey 2003                                                                                   |
| Ethiopia                              | 3 | 252 | Ethiopia World Health Survey 2003                                                                                    |
|                                       |   |     | Ethiopia Demographic and Health Survey 2016                                                                          |

|               |   |      |                                                                 |
|---------------|---|------|-----------------------------------------------------------------|
|               |   |      | Ethiopia STEPS Noncommunicable Disease Risk Factors Survey 2015 |
| Fiji          | 0 | 0    |                                                                 |
| Finland       | 1 | 3984 | European Hospital Morbidity Database, 2008                      |
| France        | 0 | 0    |                                                                 |
| Gabon         | 1 | 7    | Gabon Demographic and Health Survey 2012                        |
| Gambia        | 1 | 7    | Gambia Demographic and Health Survey 2013                       |
| Georgia       | 6 | 2755 | Georgia World Health Survey 2003                                |
|               |   |      | Georgia Reproductive Health Survey 1999-2000                    |
|               |   |      | Georgia Reproductive Health Survey 2005                         |
|               |   |      | Georgia Reproductive Health Survey 2010-2011                    |
|               |   |      | Georgia Hospital Data 2013-2017                                 |
|               |   |      | Georgia Hospital Discharges 2016-2017                           |
| Germany       | 1 | 40   | Germany Hospital Discharges by Diagnosis 2009                   |
| Ghana         | 3 | 415  | Ghana World Health Survey 2003                                  |
|               |   |      | Ghana WHO Study on Global AGEing and Adult Health 2007-2008     |
|               |   |      | Ghana Demographic and Health Survey 2008                        |
| Greece        | 0 | 0    |                                                                 |
| Greenland     | 0 | 0    |                                                                 |
| Grenada       | 0 | 0    |                                                                 |
| Guam          | 3 | 54   | United States Behavioral Risk Factor Surveillance System 2003   |
|               |   |      | United States Behavioral Risk Factor Surveillance System 2008   |
|               |   |      | United States Behavioral Risk Factor Surveillance System 2012   |
| Guatemala     | 3 | 188  | Guatemala World Health Survey 2003                              |
|               |   |      | Guatemala Reproductive Health Survey 2002                       |
|               |   |      | Guatemala Demographic and Health Survey 2014-2015               |
| Guinea        | 1 | 7    | Guinea Demographic and Health Survey 2005                       |
| Guinea-Bissau | 0 | 0    |                                                                 |
| Guyana        | 0 | 0    |                                                                 |
| Haiti         | 3 | 21   | Haiti Demographic and Health Survey 2000                        |
|               |   |      | Haiti Demographic and Health Survey 2005-2006                   |
|               |   |      | Haiti Demographic and Health Survey 2012                        |

|                            |    |       |                                                                                                                            |
|----------------------------|----|-------|----------------------------------------------------------------------------------------------------------------------------|
| Honduras                   | 3  | 21    | Honduras Demographic and Health Survey 2005-2006                                                                           |
|                            |    |       | Honduras Reproductive Health Survey 2001                                                                                   |
|                            |    |       | Honduras Demographic and Health Survey 2011-2012                                                                           |
| Hungary                    | 2  | 190   | Hungary World Health Survey 2003                                                                                           |
|                            |    |       | Hungary European Health Interview Survey 2009 - Eurostat                                                                   |
| Iceland                    | 1  | 160   | European Hospital Morbidity Database, 2008                                                                                 |
| India                      | 16 | 5756  | India Demographic and Health Survey 2005-2006                                                                              |
|                            |    |       | India World Health Survey 2003                                                                                             |
|                            |    |       | India WHO Study on Global Ageing and Adult Health 2007                                                                     |
|                            |    |       | Road use pattern and risk factors for non-fatal road traffic injuries among children in urban India                        |
|                            |    |       | India Demographic and Health Survey 2015-2016                                                                              |
|                            |    |       | Burden, distribution and impact of domestic accidents in a semi-urban area of coastal Tamil Nadu, India                    |
|                            |    |       | Characteristics of non-fatal fall injuries in rural India                                                                  |
|                            |    |       | India - Shillong Nazareth Hospital Inpatient Discharges 2014                                                               |
|                            |    |       | Incidence and burden of road traffic injuries in urban India [Unpublished data]                                            |
|                            |    |       | A population-based study on road traffic injuries in Pune City, India [Unpublished data]                                   |
|                            |    |       | India Hospital Inpatient Data 2014-2017                                                                                    |
|                            |    |       | Epidemiology of injury in rural Pondicherry, India                                                                         |
|                            |    |       | Unintentional Childhood Injuries in Urban and Rural Ujjain, India: A Community-Based Survey                                |
|                            |    |       | A study of falls among elderly persons in a rural area of Haryana                                                          |
|                            |    |       | The characteristics of, and risk factors for, child injuries in Andhra Pradesh, India: the Young Lives project             |
|                            |    |       | Epidemiology of childhood injuries in rural Puducherry, South India                                                        |
| Indonesia                  | 1  | 14368 | Indonesia Integrated Hospital Data 2013                                                                                    |
| Iran (Islamic Republic of) | 6  | 333   | Iran Demographic and Health Survey 2000                                                                                    |
|                            |    |       | Incidence and characteristics of falls leading to hip fracture in Iranian population                                       |
|                            |    |       | Iran Hospital Data 2001-2010                                                                                               |
|                            |    |       | Epidemiology and mortality of burns in the South West of Iran                                                              |
|                            |    |       | Injury incidence, healthcare consumption and avenues for prevention: a household survey on injury in rural Twiserkan, Iran |

|                                  |   |       | Population based estimates of non-fatal injuries in the capital of Iran |
|----------------------------------|---|-------|-------------------------------------------------------------------------|
| Iraq                             | 0 | 0     |                                                                         |
| Ireland                          | 0 | 0     |                                                                         |
| Israel                           | 0 | 0     |                                                                         |
| Italy                            | 3 | 83664 | Italy Hospital Inpatient Discharges 2005-2007                           |
|                                  |   |       | Italy Hospital Inpatient Discharges 2008-2012                           |
|                                  |   |       | Italy Hospital Inpatient Discharges 2013-2016                           |
| Jamaica                          | 0 | 0     |                                                                         |
| Japan                            | 2 | 7708  | Japan Diagnosis Procedure Combination Database 2010-2012                |
|                                  |   |       | Japan Diagnosis Procedure Combination Database 2013-2015                |
| Jordan                           | 3 | 137   | Jordan Al-Bashir Hospital Discharges 2016                               |
|                                  |   |       | Jordan Demographic and Health Survey 2007                               |
|                                  |   |       | Jordan Demographic and Health Survey 2012                               |
| Kazakhstan                       | 2 | 147   | Kazakhstan World Health Survey 2002-2003                                |
|                                  |   |       | Kazakhstan Multiple Indicator Cluster Survey 2010-2011                  |
| Kenya                            | 7 | 1545  | Kenya Demographic and Health Survey 2003                                |
|                                  |   |       | Kenya Demographic and Health Survey 2008-2009                           |
|                                  |   |       | Kenya World Health Survey 2004                                          |
|                                  |   |       | Kenya Violence Against Children Study 2010                              |
|                                  |   |       | Kenya National Inpatient Morbidity and Mortality Statistics 1999        |
|                                  |   |       | Kenya Demographic and Health Survey 2014                                |
|                                  |   |       | Kenya STEPS Noncommunicable Disease Risk Factors Survey 2015            |
| Kiribati                         | 1 | 1     | Kiribati Family Health and Support Study 2008                           |
| Kuwait                           | 0 | 0     |                                                                         |
| Kyrgyzstan                       | 1 | 6     | Kyrgyzstan Demographic and Health Survey 2012                           |
| Lao People's Democratic Republic | 1 | 165   | Laos World Health Survey 2003                                           |
| Latvia                           | 3 | 500   | European Hospital Morbidity Database, 2008                              |
|                                  |   |       | Latvia World Health Survey 2003                                         |
|                                  |   |       | Latvia European Health Interview Survey 2008 - Eurostat                 |
| Lebanon                          | 0 | 0     |                                                                         |

|                                  |   |        |                                                              |
|----------------------------------|---|--------|--------------------------------------------------------------|
| Lesotho                          | 0 | 0      |                                                              |
| Liberia                          | 1 | 7      | Liberia Demographic and Health Survey 2006-2007              |
| Libya                            | 0 | 0      |                                                              |
| Lithuania                        | 1 | 480    | European Hospital Morbidity Database, 2008                   |
| Luxembourg                       | 1 | 480    | European Hospital Morbidity Database, 2008                   |
| Madagascar                       | 0 | 0      |                                                              |
| Malawi                           | 4 | 171    | Malawi Demographic and Health Survey 2004-2005               |
|                                  |   |        | Malawi Demographic and Health Survey 2010                    |
|                                  |   |        | Malawi World Health Survey 2003                              |
|                                  |   |        | Malawi Demographic and Health Survey 2015-2016               |
| Malaysia                         | 1 | 160    | Malaysia World Health Survey 2003                            |
| Maldives                         | 0 | 0      |                                                              |
| Mali                             | 2 | 177    | Mali World Health Survey 2003                                |
|                                  |   |        | Mali Demographic and Health Survey 2012-2013                 |
| Malta                            | 1 | 1488   | European Hospital Morbidity Database, 2008                   |
| Marshall Islands                 | 0 | 0      |                                                              |
| Mauritania                       | 1 | 155    | Mauritania World Health Survey 2003                          |
| Mauritius                        | 1 | 155    | Mauritius World Health Survey 2003                           |
| Mexico                           | 7 | 132660 | Mexico National Health Survey 1999-2000                      |
|                                  |   |        | Mexico National Addiction Survey 2008                        |
|                                  |   |        | Mexico National Addiction Survey 2011                        |
|                                  |   |        | Mexico WHO Study on Global AGEing and Adult Health 2009-2010 |
|                                  |   |        | Mexico Ministry of Health Hospital Discharges 2000-2002      |
|                                  |   |        | Mexico Ministry of Health Hospital Discharges 2003-2007      |
|                                  |   |        | Mexico Ministry of Health Hospital Discharges 2008-2012      |
| Micronesia (Federated States of) | 0 | 0      |                                                              |
| Monaco                           | 0 | 0      |                                                              |
| Mongolia                         | 0 | 0      |                                                              |
| Montenegro                       | 0 | 0      |                                                              |
| Morocco                          | 1 | 170    | Morocco World Health Survey 2003                             |



|             |    |       |                                                                        |
|-------------|----|-------|------------------------------------------------------------------------|
| Mozambique  | 2  | 593   | Mozambique Demographic and Health Survey 2003-2004                     |
|             |    |       | Mozambique Demographic and Health Survey 2011                          |
| Myanmar     | 2  | 162   | Myanmar World Health Survey 2003                                       |
|             |    |       | Myanmar Demographic and Health Survey 2015-2016                        |
| Namibia     | 2  | 174   | Namibia World Health Survey 2003                                       |
|             |    |       | Namibia Demographic and Health Survey 2013                             |
| Nauru       | 0  | 0     |                                                                        |
| Nepal       | 5  | 1416  | Nepal World Health Survey 2003                                         |
|             |    |       | Nepal Hospital Inpatient Discharges 2010-2012                          |
|             |    |       | Nepal Hospital Inpatient Discharges 2013-2014                          |
|             |    |       | Nepal Demographic and Health Survey 2011                               |
|             |    |       | Women's Status and Violence against Young Married Women in Rural Nepal |
| Netherlands | 15 | 11332 | Netherlands Injury Surveillance System 1998                            |
|             |    |       | Netherlands Injury Surveillance System 1999                            |
|             |    |       | Netherlands Injury Surveillance System 2000                            |
|             |    |       | Netherlands Injury Surveillance System 2001                            |
|             |    |       | Netherlands Injury Surveillance System 2002                            |
|             |    |       | Netherlands Injury Surveillance System 2003                            |
|             |    |       | Netherlands Injury Surveillance System 2004                            |
|             |    |       | Netherlands Injury Surveillance System 2005                            |
|             |    |       | Netherlands Injury Surveillance System 2006                            |
|             |    |       | Netherlands Injury Surveillance System 2007                            |
|             |    |       | Netherlands Injury Surveillance System 2008                            |
|             |    |       | Netherlands Injury Surveillance System 2009                            |
|             |    |       | Netherlands Injury Surveillance System 2010                            |
|             |    |       | Netherlands Injury Surveillance System 2011                            |
|             |    |       | Netherlands Injury Surveillance System 2012                            |
| New Zealand | 15 | 19406 | New Zealand National Minimum Dataset 2000-2002                         |
|             |    |       | New Zealand National Minimum Dataset 2003-2007                         |
|             |    |       | New Zealand National Minimum Dataset 2008-2012                         |
|             |    |       | New Zealand National Minimum Dataset 2013-2014                         |

|                          |   |      |                                                                                         |
|--------------------------|---|------|-----------------------------------------------------------------------------------------|
|                          |   |      | New Zealand Accident Compensation Corporation Injury Claims 2015                        |
|                          |   |      | New Zealand Accident Compensation Corporation Injury Claims 2016                        |
|                          |   |      | New Zealand Accident Compensation Corporation Injury Claims 2017                        |
|                          |   |      | New Zealand Accident Compensation Corporation Injury Claims 2014                        |
|                          |   |      | New Zealand Accident Compensation Corporation Injury Claims 2013                        |
|                          |   |      | New Zealand Accident Compensation Corporation Injury Claims 2012                        |
|                          |   |      | New Zealand Accident Compensation Corporation Injury Claims 2011                        |
|                          |   |      | New Zealand Accident Compensation Corporation Injury Claims 2010                        |
|                          |   |      | New Zealand Accident Compensation Corporation Injury Claims 2009                        |
|                          |   |      | New Zealand Accident Compensation Corporation Injury Claims 2008                        |
|                          |   |      | New Zealand National Minimum Dataset 2016-2017                                          |
| Nicaragua                | 2 | 14   | Nicaragua Reproductive Health Survey 2006-2007                                          |
|                          |   |      | Nicaragua Demographic and Health Survey 1997-1998                                       |
| Niger                    | 0 | 0    |                                                                                         |
| Nigeria                  | 3 | 520  | The burden of road traffic injuries in Nigeria: results of a population-based survey    |
|                          |   |      | Nigeria Demographic and Health Survey 2008                                              |
|                          |   |      | Nigeria Demographic and Health Survey 2013                                              |
| Niue                     | 0 | 0    |                                                                                         |
| North Macedonia          | 0 | 0    |                                                                                         |
| Northern Mariana Islands | 0 | 0    |                                                                                         |
| Norway                   | 1 | 1128 | Norway Patient Register 2008-2012                                                       |
| Oman                     | 0 | 0    |                                                                                         |
| Pakistan                 | 2 | 173  | Pakistan World Health Survey 2003-2004                                                  |
|                          |   |      | Burden of fall injuries in Pakistan--analysis of the National Injury Survey of Pakistan |
| Palau                    | 0 | 0    |                                                                                         |
| Palestine                | 0 | 0    |                                                                                         |
| Panama                   | 0 | 0    |                                                                                         |
| Papua New Guinea         | 0 | 0    |                                                                                         |
| Paraguay                 | 3 | 162  | Paraguay Reproductive Health Survey 2004                                                |
|                          |   |      | Paraguay World Health Survey 2002-2003                                                  |
|                          |   |      | Paraguay Reproductive Health Survey 2008                                                |

|                     |   |       |                                                                                                |
|---------------------|---|-------|------------------------------------------------------------------------------------------------|
| Peru                | 1 | 7     | Peru Continuous Demographic and Health Survey 2014 - INEI                                      |
| Philippines         | 4 | 2495  | Philippines World Health Survey 2003                                                           |
|                     |   |       | Philippine Health Insurance Corporation Claims 2013-2016                                       |
|                     |   |       | Philippines Demographic and Health Survey 2008                                                 |
|                     |   |       | Philippines Demographic and Health Survey 2013                                                 |
| Poland              | 4 | 47840 | European Hospital Morbidity Database, 2008                                                     |
|                     |   |       | Poland National Health Fund Patient Claims 2015                                                |
|                     |   |       | Poland National Health Fund Patient Claims 2016                                                |
|                     |   |       | Poland National Health Fund Patient Claims 2017                                                |
| Portugal            | 1 | 1166  | Portugal Hospital Inpatient Discharges 2015                                                    |
| Puerto Rico         | 6 | 131   | United States Behavioral Risk Factor Surveillance System 2003                                  |
|                     |   |       | United States Behavioral Risk Factor Surveillance System 2005                                  |
|                     |   |       | United States Behavioral Risk Factor Surveillance System 2006                                  |
|                     |   |       | United States Behavioral Risk Factor Surveillance System 2007                                  |
|                     |   |       | United States Behavioral Risk Factor Surveillance System 2008                                  |
|                     |   |       | United States Behavioral Risk Factor Surveillance System 2012                                  |
| Qatar               | 3 | 96    | Qatar - Annual Inpatients Discharge Abstract: Hamad General Hospital 2002                      |
|                     |   |       | Qatar - Annual Inpatients Discharge Abstract: Hamad General Hospital and Women's Hospital 2003 |
|                     |   |       | Qatar STEPS Noncommunicable Disease Risk Factors Survey 2012                                   |
| Republic of Korea   | 0 | 0     |                                                                                                |
| Republic of Moldova | 1 | 7     | Moldova Demographic and Health Survey 2005                                                     |
| Romania             | 4 | 199   | European Hospital Morbidity Database, 2008                                                     |
|                     |   |       | Romania Reproductive Health Survey 1999                                                        |
|                     |   |       | Romania Reproductive Health Survey 2004                                                        |
|                     |   |       | Romania European Health Interview Survey 2008 - Eurostat                                       |
| Russian Federation  | 2 | 3520  | Russia World Health Survey 2003                                                                |
|                     |   |       | Russia WHO Study on Global AGEing and Adult Health 2007-2010                                   |
| Rwanda              | 4 | 38    | Rwanda Demographic and Health Survey 2005                                                      |
|                     |   |       | Rwanda Demographic and Health Survey 2010-2011                                                 |
|                     |   |       | Rwanda Demographic and Health Survey 2014-2015                                                 |

|                                  |   |      | Women are considerably more exposed to intimate partner violence than men in Rwanda: results from a population-based, cross-sectional study |
|----------------------------------|---|------|---------------------------------------------------------------------------------------------------------------------------------------------|
| Saint Kitts and Nevis            | 0 | 0    |                                                                                                                                             |
| Saint Lucia                      | 0 | 0    |                                                                                                                                             |
| Saint Vincent and the Grenadines | 0 | 0    |                                                                                                                                             |
| Samoa                            | 1 | 1    | Samoa Family Health and Safety Study 2000                                                                                                   |
| San Marino                       | 0 | 0    |                                                                                                                                             |
| Sao Tome and Principe            | 1 | 7    | Sao Tome and Principe Demographic and Health Survey 2008-2009                                                                               |
| Saudi Arabia                     | 0 | 0    |                                                                                                                                             |
| Senegal                          | 2 | 157  | Senegal World Health Survey 2003                                                                                                            |
|                                  |   |      | Senegal Demographic and Health Survey 2005                                                                                                  |
| Serbia                           | 1 | 160  | European Hospital Morbidity Database, 2008                                                                                                  |
| Seychelles                       | 0 | 0    |                                                                                                                                             |
| Sierra Leone                     | 1 | 16   | Sierra Leone Demographic and Health Survey 2013                                                                                             |
| Singapore                        | 0 | 0    |                                                                                                                                             |
| Slovakia                         | 2 | 620  | Slovakia World Health Survey 2003                                                                                                           |
|                                  |   |      | European Hospital Morbidity Database, 2008                                                                                                  |
| Slovenia                         | 2 | 2806 | European Hospital Morbidity Database, 2008                                                                                                  |
|                                  |   |      | Slovenia World Health Survey 2003                                                                                                           |
| Solomon Islands                  | 0 | 0    |                                                                                                                                             |
| Somalia                          | 0 | 0    |                                                                                                                                             |
| South Africa                     | 5 | 5489 | South Africa Demographic and Health Survey 1998                                                                                             |
|                                  |   |      | South Africa World Health Survey 2002-2003                                                                                                  |
|                                  |   |      | South Africa WHO Study on Global AGEing and Adult Health 2007-2008                                                                          |
|                                  |   |      | Prevalence of emotional, physical and sexual abuse of women in three South African provinces                                                |
|                                  |   |      | South Africa National HIV Prevalence, Incidence, Behavior and Communication Survey 2008-2009                                                |
| South Sudan                      | 0 | 0    |                                                                                                                                             |
| Spain                            | 2 | 265  | Spain World Health Survey 2002-2003                                                                                                         |
|                                  |   |      | Spain Household Survey on Alcohol and Drugs 2007-2008                                                                                       |
| Sri Lanka                        | 1 | 155  | Sri Lanka World Health Survey 2003                                                                                                          |

|                            |    |      |                                                                                                                           |
|----------------------------|----|------|---------------------------------------------------------------------------------------------------------------------------|
| Sudan                      | 0  | 0    |                                                                                                                           |
| Suriname                   | 0  | 0    |                                                                                                                           |
| Sweden                     | 16 | 2234 | Sweden National Patient Register 2001                                                                                     |
|                            |    |      | Sweden National Patient Register 2002                                                                                     |
|                            |    |      | Sweden National Patient Register 2003                                                                                     |
|                            |    |      | Sweden National Patient Register 2004                                                                                     |
|                            |    |      | Sweden National Patient Register 2005                                                                                     |
|                            |    |      | Sweden National Patient Register 2006                                                                                     |
|                            |    |      | Sweden National Patient Register 2007                                                                                     |
|                            |    |      | Sweden National Patient Register 2008                                                                                     |
|                            |    |      | Sweden National Patient Register 2009                                                                                     |
|                            |    |      | Sweden National Patient Register 2010                                                                                     |
|                            |    |      | Sweden National Patient Register 2011                                                                                     |
|                            |    |      | Sweden National Patient Register 2012                                                                                     |
|                            |    |      | Sweden National Patient Register 1998-2002                                                                                |
|                            |    |      | Sweden National Patient Register 2003-2007                                                                                |
|                            |    |      | Sweden National Patient Register 2008-2012                                                                                |
|                            |    |      | Self-reported exposure to intimate partner violence among women and men in Sweden: results from a population-based survey |
| Switzerland                | 1  | 3984 | European Hospital Morbidity Database, 2008                                                                                |
| Syrian Arab Republic       | 1  | 4    | Injuries in Aleppo, Syria; first population-based estimates and characterization of predominant types                     |
| Taiwan (Province of China) | 0  | 0    |                                                                                                                           |
| Tajikistan                 | 1  | 7    | Tajikistan Demographic and Health Survey 2012                                                                             |
| Thailand                   | 1  | 48   | Thailand National Injury Survey 2003-2004                                                                                 |
| Timor-Leste                | 1  | 7    | Timor-Leste Demographic and Health Survey 2009-2010                                                                       |
| Togo                       | 1  | 7    | Togo Demographic and Health Survey 2013-2014                                                                              |
| Tokelau                    | 0  | 0    |                                                                                                                           |
| Tonga                      | 1  | 6    | Tonga National Study on Domestic Violence Against Women 2008-2009                                                         |
| Trinidad and Tobago        | 0  | 0    |                                                                                                                           |
| Tunisia                    | 1  | 165  | Tunisia World Health Survey 2003                                                                                          |
| Turkey                     | 4  | 213  | Turkey World Health Survey 2003                                                                                           |

|                             |    |       |                                                                                         |
|-----------------------------|----|-------|-----------------------------------------------------------------------------------------|
|                             |    |       | Turkey National Research on Domestic Violence Against Women 2008                        |
|                             |    |       | Turkey National Research on Domestic Violence Against Women 2014                        |
|                             |    |       | Turkey Diagnosis-Related Group Hospital Inpatient Database 2011-2012                    |
| Turkmenistan                | 0  | 0     |                                                                                         |
| Tuvalu                      | 0  | 0     |                                                                                         |
| Uganda                      | 3  | 39    | Uganda Child Verbal Autopsy Study 2007                                                  |
|                             |    |       | Uganda AIDS Indicator Survey 2011                                                       |
|                             |    |       | Uganda Demographic and Health Survey 2011                                               |
| Ukraine                     | 2  | 161   | Ukraine Demographic and Health Survey 2007                                              |
|                             |    |       | Ukraine World Health Survey 2002-2003                                                   |
| United Arab Emirates        | 1  | 135   | United Arab Emirates World Health Survey 2003                                           |
| United Kingdom              | 8  | 49268 | United Kingdom - England Hospital Episode Statistics 2003-2007                          |
|                             |    |       | United Kingdom - England Hospital Episode Statistics 2001-2002                          |
|                             |    |       | United Kingdom - England Hospital Episode Statistics 2008-2012                          |
|                             |    |       | United Kingdom - England Hospital Episode Statistics 2013-2014                          |
|                             |    |       | United Kingdom - England Adult Psychiatric Morbidity Survey 2006-2007 - UK Data Service |
|                             |    |       | United Kingdom - Scottish Crime and Justice Survey 2008-2009 - UK Data Service          |
|                             |    |       | United Kingdom - Scottish Crime and Justice Survey 2009-2010 - UK Data Service          |
|                             |    |       | United Kingdom - Scottish Crime and Justice Survey 2010-2011 - UK Data Service          |
| United Republic of Tanzania | 2  | 14    | Tanzania Demographic and Health Survey 2009-2010                                        |
|                             |    |       | Tanzania Demographic and Health Survey 2015-2016                                        |
| United States of America    | 44 | 81198 | United States National Hospital Ambulatory Medical Care Survey 1992                     |
|                             |    |       | United States National Hospital Ambulatory Medical Care Survey 2008                     |
|                             |    |       | United States National Hospital Ambulatory Medical Care Survey 2009                     |
|                             |    |       | United States National Hospital Ambulatory Medical Care Survey 2010                     |
|                             |    |       | United States National Hospital Ambulatory Medical Care Survey 1993                     |
|                             |    |       | United States National Hospital Ambulatory Medical Care Survey 1994                     |
|                             |    |       | United States National Hospital Ambulatory Medical Care Survey 1995                     |
|                             |    |       | United States National Hospital Ambulatory Medical Care Survey 1996                     |
|                             |    |       | United States National Hospital Ambulatory Medical Care Survey 1997                     |
|                             |    |       | United States National Hospital Ambulatory Medical Care Survey 1998                     |

|  |  |  |                                                                     |
|--|--|--|---------------------------------------------------------------------|
|  |  |  | United States National Hospital Ambulatory Medical Care Survey 1999 |
|  |  |  | United States National Hospital Ambulatory Medical Care Survey 2002 |
|  |  |  | United States National Hospital Ambulatory Medical Care Survey 2000 |
|  |  |  | United States National Hospital Ambulatory Medical Care Survey 2001 |
|  |  |  | United States National Hospital Ambulatory Medical Care Survey 2003 |
|  |  |  | United States National Hospital Ambulatory Medical Care Survey 2004 |
|  |  |  | United States National Hospital Ambulatory Medical Care Survey 2005 |
|  |  |  | United States National Hospital Ambulatory Medical Care Survey 2006 |
|  |  |  | United States National Hospital Ambulatory Medical Care Survey 2007 |
|  |  |  | United States National Health Interview Survey 2008                 |
|  |  |  | United States National Health Interview Survey 2009                 |
|  |  |  | United States National Hospital Ambulatory Medical Care Survey 2011 |
|  |  |  | United States National Health Interview Survey 2010                 |
|  |  |  | United States National Ambulatory Medical Care Survey 2012          |
|  |  |  | United States National Health Interview Survey 2011                 |
|  |  |  | United States National Hospital Discharge Survey 1988-1992          |
|  |  |  | United States National Hospital Discharge Survey 1993-1997          |
|  |  |  | United States National Hospital Discharge Survey 1998-2002          |
|  |  |  | United States National Hospital Discharge Survey 2003-2007          |
|  |  |  | United States National Hospital Discharge Survey 2008-2010          |
|  |  |  | United States National Hospital Ambulatory Medical Care Survey 2012 |
|  |  |  | United States National Ambulatory Medical Care Survey 2013          |
|  |  |  | United States National Hospital Ambulatory Medical Care Survey 2013 |
|  |  |  | United States State Inpatient Databases 2003-2007                   |
|  |  |  | United States State Inpatient Databases 2008-2009                   |
|  |  |  | United States National Hospital Ambulatory Medical Care Survey 2014 |
|  |  |  | United States Behavioral Risk Factor Surveillance System 2003       |
|  |  |  | United States Behavioral Risk Factor Surveillance System 2006       |
|  |  |  | United States Behavioral Risk Factor Surveillance System 2008       |
|  |  |  | United States Behavioral Risk Factor Surveillance System 2012       |
|  |  |  | United States Behavioral Risk Factor Surveillance System 2005       |

|                                    |   |      |                                                                                                      |
|------------------------------------|---|------|------------------------------------------------------------------------------------------------------|
|                                    |   |      | United States Behavioral Risk Factor Surveillance System 2007                                        |
|                                    |   |      | United States National Epidemiologic Survey on Alcohol and Related Conditions 2004-2005              |
|                                    |   |      | United States Gender, Alcohol and Culture: An International Study (GENACIS) 1995-1996                |
| United States Virgin Islands       | 4 | 99   | United States Behavioral Risk Factor Surveillance System 2003                                        |
|                                    |   |      | United States Behavioral Risk Factor Surveillance System 2005                                        |
|                                    |   |      | United States Behavioral Risk Factor Surveillance System 2006                                        |
|                                    |   |      | United States Behavioral Risk Factor Surveillance System 2008                                        |
| Uruguay                            | 1 | 155  | Uruguay World Health Survey 2002-2003                                                                |
| Uzbekistan                         | 0 | 0    |                                                                                                      |
| Vanuatu                            | 0 | 0    |                                                                                                      |
| Venezuela (Bolivarian Republic of) | 0 | 0    |                                                                                                      |
| Viet Nam                           | 7 | 1746 | Vietnam World Health Survey 2002-2003                                                                |
|                                    |   |      | Injury and pre-hospital trauma care in Hanoi, Vietnam                                                |
|                                    |   |      | Community-based assessment of unintentional injuries: a pilot study in rural Vietnam                 |
|                                    |   |      | Vietnam Hospital Data 2013                                                                           |
|                                    |   |      | Vietnam Injury Survey 2010                                                                           |
|                                    |   |      | Vietnam Multi-Center Injury Survey 2001                                                              |
|                                    |   |      | Suicide attempt in a rural area of Vietnam: Incidence, methods used and access to mental health care |
| Yemen                              | 0 | 0    |                                                                                                      |
| Zambia                             | 6 | 186  | Zambia Demographic and Health Survey 2001-2002                                                       |
|                                    |   |      | Zambia Demographic and Health Survey 2007                                                            |
|                                    |   |      | Zambia World Health Survey 2003                                                                      |
|                                    |   |      | Zambia Sexual Behavior Survey 2005                                                                   |
|                                    |   |      | Zambia Sexual Behavior Survey 2009                                                                   |
|                                    |   |      | Zambia Demographic and Health Survey 2013-2014                                                       |
| Zimbabwe                           | 4 | 193  | Zimbabwe World Health Survey 2003                                                                    |
|                                    |   |      | Zimbabwe Demographic and Health Survey 2005-2006                                                     |
|                                    |   |      | Zimbabwe Demographic and Health Survey 2010-2011                                                     |
|                                    |   |      | Zimbabwe Demographic and Health Survey 2015                                                          |
