# Supplementary material for: Global, regional and national burden of traumatic brain injury and spinal cord injury, 1990–2019: a systematic analysis for the Global Burden of Disease Study 2019
Source: PubMed Central journal article supplement — BMJ Open. 2023 Oct 6;13(10):e075049. doi: 10.1136/bmjopen-2023-075049 (PMC10565269; doi:10.1136/bmjopen-2023-075049), 2023-10-06
Supplement: bmjopen-2023-075049supp009.pdf [file bmjopen-2023-075049supp009.pdf]

**eTable 2. Global Burden of Disease severity hierarchy for nature-of-injury**

| Rank | Inpatient hierarchy                                                                                                               | Outpatient hierarchy                                                    |
|------|-----------------------------------------------------------------------------------------------------------------------------------|-------------------------------------------------------------------------|
| 1    | Spinal cord lesion below neck level                                                                                               | Fracture of pelvis                                                      |
| 2    | Amputation of lower limbs, bilateral                                                                                              | Fracture of patella, tibia or fibula, or ankle                          |
| 3    | Amputation of upper limbs, bilateral                                                                                              | Fracture of hip                                                         |
| 4    | Spinal cord lesion at neck level                                                                                                  | Fracture of skull                                                       |
| 5    | Fracture of hip                                                                                                                   | Amputation of thumb                                                     |
| 6    | Fracture of femur, other than femoral neck                                                                                        | Fracture of vertebral column                                            |
| 7    | Amputation of upper limb, unilateral                                                                                              | Multiple fractures, dislocations, crashes, wounds, sprains, and strains |
| 8    | Amputation of lower limb, unilateral                                                                                              | Internal hemorrhage in abdomen and pelvis                               |
| 9    | Multiple fractures, dislocations, crashes, wounds, sprains, and strains                                                           | Fracture of femur, other than femoral neck                              |
| 10   | Effect of different environmental factors                                                                                         | Dislocation of hip                                                      |
| 11   | Fracture of patella, tibia or fibula, or ankle                                                                                    | Amputation of toe/toes                                                  |
| 12   | Moderate-Severe traumatic brain injury                                                                                            | Fracture of hand (wrist and other distal part of hand)                  |
| 13   | Fracture of foot bones except ankle                                                                                               | Amputation of fingers (excluding thumb)                                 |
| 14   | Internal hemorrhage in abdomen and pelvis                                                                                         | Burns, <20% of total burned surface area without lower airway burns     |
| 15   | Crush injury                                                                                                                      | Dislocation of knee                                                     |
| 16   | Minor traumatic brain injury                                                                                                      | Contusion in any part of the body                                       |
| 17   | Fracture of pelvis                                                                                                                | Minor traumatic brain injury                                            |
| 18   | Nerve injury                                                                                                                      | Foreign body in respiratory system                                      |
| 19   | Severe chest injury                                                                                                               | Severe chest injury                                                     |
| 20   | Dislocation of hip                                                                                                                | Drowning and nonfatal submersion                                        |
| 21   | Burns, >= 20% total burned surface area or >= 10% burned surface area if head/neck or hands/wrist involved w/o lower airway burns | Asphyxiation                                                            |
| 22   | Lower airway burns                                                                                                                | Poisoning requiring urgent care                                         |
| 23   | Fracture of skull                                                                                                                 | Effect of different environmental factors                               |
| 24   | Amputation of thumb                                                                                                               | Foreign body in GI and urogenital system                                |
| 25   | Fracture of hand (wrist and other distal part of hand)                                                                            | Fracture of sternum and/or fracture of one or more ribs                 |
| 26   | Fracture of vertebral column                                                                                                      | Nerve injury                                                            |
| 27   | Contusion in any part of the body                                                                                                 | Fracture of face bones                                                  |
| 28   | Open wound(s)                                                                                                                     | Dislocation of shoulder                                                 |
| 29   | Amputation of toe/toes                                                                                                            | Injury to eyes                                                          |
| 30   | Dislocation of knee                                                                                                               | Fracture of clavicle, scapula, or humerus                               |
| 31   | Amputation of fingers (excluding thumb)                                                                                           | Fracture of radius and/or ulna                                          |
| 32   | Drowning and nonfatal submersion                                                                                                  | Fracture of foot bones except ankle                                     |
| 33   | Asphyxiation                                                                                                                      | Foreign body in ear                                                     |

| <b>Rank</b> | <b>Inpatient hierarchy</b>                                                    | <b>Outpatient hierarchy</b>                                                   |
|-------------|-------------------------------------------------------------------------------|-------------------------------------------------------------------------------|
| 34          | Burns, <20% total burned surface area without lower airway burns              | Muscle and tendon injuries, including sprains and strains lesser dislocations |
| 35          | Muscle and tendon injuries, including sprains and strains lesser dislocations | Superficial injury of any part of the body                                    |
| 36          | Fracture of face bones                                                        | Open wound(s)                                                                 |
| 37          | Foreign body in respiratory system                                            | Complications following therapeutic procedures                                |
| 38          | Poisoning requiring urgent care                                               |                                                                               |
| 39          | Foreign body in GI and urogenital system                                      |                                                                               |
| 40          | Fracture of sternum and/or fracture of one or more ribs                       |                                                                               |
| 41          | Dislocation of shoulder                                                       |                                                                               |
| 42          | Injury to eyes                                                                |                                                                               |
| 43          | Fracture of clavicle, scapula, or humerus                                     |                                                                               |
| 44          | Fracture of radius and/or ulna                                                |                                                                               |
| 45          | Foreign body in ear                                                           |                                                                               |
| 46          | Superficial injury of any part of the body                                    |                                                                               |
| 47          | Complications following therapeutic procedures                                |                                                                               |
