# Supplementary material for: Global, regional and national burden of traumatic brain injury and spinal cord injury, 1990–2019: a systematic analysis for the Global Burden of Disease Study 2019
Source: PubMed Central journal article supplement — BMJ Open. 2023 Oct 6;13(10):e075049. doi: 10.1136/bmjopen-2023-075049 (PMC10565269; doi:10.1136/bmjopen-2023-075049), 2023-10-06
Supplement: bmjopen-2023-075049supp011.pdf [file bmjopen-2023-075049supp011.pdf]

**eTable 4. Global Burden of Disease (GBD) location hierarchy: 7 GBD super regions, 21 GBD regions, and 204 countries and territories**

| <b>GBD hierarchy</b> | <b>Location</b>           |
|----------------------|---------------------------|
| GBD super region     | High-income               |
| GBD region           | High-income North America |
|                      | Canada                    |
|                      | Greenland                 |
|                      | United States of America  |
| GBD region           | Australasia               |
|                      | Australia                 |
|                      | New Zealand               |
| GBD region           | High-income Asia Pacific  |
|                      | Brunei Darussalam         |
|                      | Japan                     |
|                      | Republic of Korea         |
|                      | Singapore                 |
| GBD region           | Western Europe            |
|                      | Andorra                   |
|                      | Austria                   |
|                      | Belgium                   |
|                      | Cyprus                    |
|                      | Denmark                   |
|                      | Finland                   |
|                      | France                    |
|                      | Germany                   |
|                      | Greece                    |
|                      | Iceland                   |
|                      | Ireland                   |
|                      | Israel                    |
|                      | Italy                     |
|                      | Luxembourg                |
|                      | Malta                     |
|                      | Monaco                    |
|                      | Netherlands               |
|                      | Norway                    |
|                      | Portugal                  |
|                      | San Marino                |
|                      | Spain                     |
|                      | Sweden                    |
|                      | Switzerland               |
|                      | United Kingdom            |
| GBD region           | Southern Latin America    |
|                      | Argentina                 |

| <b>GBD hierarchy</b> | <b>Location</b>                                  |
|----------------------|--------------------------------------------------|
|                      | Chile                                            |
|                      | Uruguay                                          |
| GBD super region     | Central Europe, Eastern Europe, and Central Asia |
| GBD region           | Eastern Europe                                   |
|                      | Belarus                                          |
|                      | Estonia                                          |
|                      | Latvia                                           |
|                      | Lithuania                                        |
|                      | Republic of Moldova                              |
|                      | Russian Federation                               |
|                      | Ukraine                                          |
| GBD region           | Central Europe                                   |
|                      | Albania                                          |
|                      | Bosnia and Herzegovina                           |
|                      | Bulgaria                                         |
|                      | Croatia                                          |
|                      | Czechia                                          |
|                      | Hungary                                          |
|                      | Montenegro                                       |
|                      | North Macedonia                                  |
|                      | Poland                                           |
|                      | Romania                                          |
|                      | Serbia                                           |
|                      | Slovakia                                         |
|                      | Slovenia                                         |
| GBD region           | Central Asia                                     |
|                      | Armenia                                          |
|                      | Azerbaijan                                       |
|                      | Georgia                                          |
|                      | Kazakhstan                                       |
|                      | Kyrgyzstan                                       |
|                      | Mongolia                                         |
|                      | Tajikistan                                       |
|                      | Turkmenistan                                     |
|                      | Uzbekistan                                       |
| GBD super region     | Latin America and Caribbean                      |
| GBD region           | Central Latin America                            |
|                      | Colombia                                         |
|                      | Costa Rica                                       |
|                      | El Salvador                                      |
|                      | Guatemala                                        |

| <b>GBD hierarchy</b> | <b>Location</b>                        |
|----------------------|----------------------------------------|
|                      | Honduras                               |
|                      | Mexico                                 |
|                      | Nicaragua                              |
|                      | Panama                                 |
|                      | Venezuela (Bolivarian Republic of)     |
| GBD region           | Andean Latin America                   |
|                      | Bolivia (Plurinational State of)       |
|                      | Ecuador                                |
|                      | Peru                                   |
| GBD region           | Caribbean                              |
|                      | Antigua and Barbuda                    |
|                      | Bahamas                                |
|                      | Barbados                               |
|                      | Belize                                 |
|                      | Bermuda                                |
|                      | Cuba                                   |
|                      | Dominica                               |
|                      | Dominican Republic                     |
|                      | Grenada                                |
|                      | Guyana                                 |
|                      | Haiti                                  |
|                      | Jamaica                                |
|                      | Puerto Rico                            |
|                      | Saint Lucia                            |
|                      | Saint Kitts and Nevis                  |
|                      | Saint Vincent and the Grenadines       |
|                      | Suriname                               |
|                      | Trinidad and Tobago                    |
|                      | United States Virgin Islands           |
| GBD region           | Tropical Latin America                 |
|                      | Brazil                                 |
|                      | Paraguay                               |
| GBD super region     | Southeast Asia, East Asia, and Oceania |
| GBD region           | East Asia                              |
|                      | China                                  |
|                      | Democratic People's Republic of Korea  |
|                      | Taiwan (Province of China)             |
| GBD region           | Southeast Asia                         |
|                      | Cambodia                               |
|                      | Indonesia                              |
|                      | Lao People's Democratic Republic       |
|                      | Malaysia                               |

| <b>GBD hierarchy</b> | <b>Location</b>                  |
|----------------------|----------------------------------|
|                      | Maldives                         |
|                      | Mauritius                        |
|                      | Myanmar                          |
|                      | Philippines                      |
|                      | Seychelles                       |
|                      | Sri Lanka                        |
|                      | Thailand                         |
|                      | Timor-Leste                      |
|                      | Viet Nam                         |
| GBD region           | Oceania                          |
|                      | American Samoa                   |
|                      | Cook Islands                     |
|                      | Fiji                             |
|                      | Guam                             |
|                      | Kiribati                         |
|                      | Marshall Islands                 |
|                      | Micronesia (Federated States of) |
|                      | Nauru                            |
|                      | Niue                             |
|                      | Northern Mariana Islands         |
|                      | Palau                            |
|                      | Papua New Guinea                 |
|                      | Samoa                            |
|                      | Solomon Islands                  |
|                      | Tokelau                          |
|                      | Tonga                            |
|                      | Vanuatu                          |
|                      | Tuvalu                           |
| GBD super region     | North Africa and Middle East     |
| GBD region           | North Africa and Middle East     |
|                      | Afghanistan                      |
|                      | Algeria                          |
|                      | Bahrain                          |
|                      | Egypt                            |
|                      | Iran (Islamic Republic of)       |
|                      | Iraq                             |
|                      | Jordan                           |
|                      | Kuwait                           |
|                      | Lebanon                          |
|                      | Libya                            |
|                      | Morocco                          |
|                      | Oman                             |

| <b>GBD hierarchy</b> | <b>Location</b>             |
|----------------------|-----------------------------|
|                      | Palestine                   |
|                      | Qatar                       |
|                      | Saudi Arabia                |
|                      | Sudan                       |
|                      | Syrian Arab Republic        |
|                      | Tunisia                     |
|                      | Turkey                      |
|                      | United Arab Emirates        |
|                      | Yemen                       |
| GBD super region     | South Asia                  |
| GBD region           | South Asia                  |
|                      | Bangladesh                  |
|                      | Bhutan                      |
|                      | India                       |
|                      | Nepal                       |
|                      | Pakistan                    |
| GBD super region     | Sub-Saharan Africa          |
| GBD region           | Southern Sub-Saharan Africa |
|                      | Botswana                    |
|                      | Eswatini                    |
|                      | Lesotho                     |
|                      | Namibia                     |
|                      | South Africa                |
|                      | Zimbabwe                    |
| GBD region           | Western Sub-Saharan Africa  |
|                      | Benin                       |
|                      | Burkina Faso                |
|                      | Cape Verde                  |
|                      | Cameroon                    |
|                      | Chad                        |
|                      | Côte d'Ivoire               |
|                      | Gambia                      |
|                      | Ghana                       |
|                      | Guinea                      |
|                      | Guinea-Bissau               |
|                      | Liberia                     |
|                      | Mali                        |
|                      | Mauritania                  |
|                      | Niger                       |
|                      | Nigeria                     |
|                      | Sao Tome and Principe       |
|                      | Senegal                     |

| <b>GBD hierarchy</b> | <b>Location</b>                  |
|----------------------|----------------------------------|
|                      | Sierra Leone                     |
|                      | Togo                             |
| GBD region           | Eastern Sub-Saharan Africa       |
|                      | Burundi                          |
|                      | Comoros                          |
|                      | Djibouti                         |
|                      | Eritrea                          |
|                      | Ethiopia                         |
|                      | Kenya                            |
|                      | Madagascar                       |
|                      | Malawi                           |
|                      | Mozambique                       |
|                      | Rwanda                           |
|                      | Somalia                          |
|                      | South Sudan                      |
|                      | Uganda                           |
|                      | United Republic of Tanzania      |
|                      | Zambia                           |
| GBD region           | Central Sub-Saharan Africa       |
|                      | Angola                           |
|                      | Central African Republic         |
|                      | Congo                            |
|                      | Democratic Republic of the Congo |
|                      | Equatorial Guinea                |
|                      | Gabon                            |
