# Supplementary material for: Global, regional and national burden of traumatic brain injury and spinal cord injury, 1990–2019: a systematic analysis for the Global Burden of Disease Study 2019
Source: PubMed Central journal article supplement — BMJ Open. 2023 Oct 6;13(10):e075049. doi: 10.1136/bmjopen-2023-075049 (PMC10565269; doi:10.1136/bmjopen-2023-075049), 2023-10-06
Supplement: bmjopen-2023-075049supp012.pdf [file bmjopen-2023-075049supp012.pdf]

**eTable 5. Global Burden of Disease world population standard**

| Age group      | Percent of population | Rounded |
|----------------|-----------------------|---------|
| Early neonatal | 0.039706188           | 0.04    |
| Late neonatal  | 0.118021789           | 0.12    |
| Post neonatal  | 1.868264909           | 1.87    |
| <1             | 2.025992886           | 2.03    |
| 1 to 4         | 7.909875913           | 7.91    |
| 5 to 9         | 9.568418272           | 9.57    |
| 10 to 14       | 8.990277942           | 8.99    |
| 15 to 19       | 8.324362192           | 8.32    |
| 20 to 24       | 7.866450176           | 7.87    |
| 25 to 29       | 7.632917343           | 7.63    |
| 30 to 34       | 7.331511124           | 7.33    |
| 35 to 39       | 6.811055              | 6.81    |
| 40 to 44       | 6.136798184           | 6.14    |
| 45 to 49       | 5.509495973           | 5.51    |
| 50 to 54       | 4.921822565           | 4.92    |
| 55 to 59       | 4.345633072           | 4.35    |
| 60 to 64       | 3.684473754           | 3.68    |
| 65 to 69       | 2.991239718           | 2.99    |
| 70 to 74       | 2.272487547           | 2.27    |
| 75 to 79       | 1.607371655           | 1.61    |
| 80 to 84       | 1.113034599           | 1.11    |
| 85 to 89       | 0.61707008            | 0.62    |
| 90 to 94       | 0.255008068           | 0.26    |
| 95 plus        | 0.084703935           | 0.08    |
