# Supplementary material for: Global, regional and national burden of traumatic brain injury and spinal cord injury, 1990–2019: a systematic analysis for the Global Burden of Disease Study 2019
Source: PubMed Central journal article supplement — BMJ Open. 2023 Oct 6;13(10):e075049. doi: 10.1136/bmjopen-2023-075049 (PMC10565269; doi:10.1136/bmjopen-2023-075049), 2023-10-06
Supplement: bmjopen-2023-075049supp013.pdf [file bmjopen-2023-075049supp013.pdf]

eTable 6. Global Burden of Disease (GBD) cause hierarchy with levels for injuries

| Cause                                                  | Level |
|--------------------------------------------------------|-------|
| Injuries                                               | 1     |
| Transport injuries                                     | 2     |
| Road injuries                                          | 3     |
| <b>Pedestrian road injuries</b>                        | 4     |
| <b>Cyclist road injuries</b>                           | 4     |
| <b>Motorcyclist road injuries</b>                      | 4     |
| <b>Motor vehicle road injuries</b>                     | 4     |
| <b>Other road injuries</b>                             | 4     |
| <b>Other transport injuries</b>                        | 3     |
| Unintentional injuries                                 | 2     |
| <b>Falls</b>                                           | 3     |
| <b>Drowning</b>                                        | 3     |
| <b>Fire, heat, and hot substances</b>                  | 3     |
| Poisonings                                             | 3     |
| <b>Poisoning by carbon monoxide</b>                    | 4     |
| <b>Poisoning by other means</b>                        | 4     |
| Exposure to mechanical forces                          | 3     |
| <b>Unintentional firearm injuries</b>                  | 4     |
| <b>Other exposure to mechanical forces</b>             | 4     |
| <b>Adverse effects of medical treatment</b>            | 3     |
| Animal contact                                         | 3     |
| <b>Venomous animal contact</b>                         | 4     |
| <b>Non-venomous animal contact</b>                     | 4     |
| Foreign body                                           | 3     |
| <b>Pulmonary aspiration and foreign body in airway</b> | 4     |
| <b>Foreign body in eyes</b>                            | 4     |
| <b>Foreign body in other body part</b>                 | 4     |
| <b>Environmental heat and cold exposure</b>            | 3     |
| <b>Exposure to forces of nature</b>                    | 3     |
| <b>Other unintentional injuries</b>                    | 3     |
| Self-harm and interpersonal violence                   | 2     |
| Self-harm                                              | 3     |
| <b>Self-harm by firearm</b>                            | 4     |
| <b>Self-harm by other specified means</b>              | 4     |
| Interpersonal violence                                 | 3     |
| <b>Physical violence by firearm</b>                    | 4     |
| <b>Physical violence by sharp object</b>               | 4     |
| <b>Physical violence by other means</b>                | 4     |
| <b>Conflict and terrorism</b>                          | 3     |
| <b>Executions and police conflict</b>                  | 3     |

The 29 causes in **bold** (they were called the most detailed causes in the GBD 2019 study) were analyzed in our study, which was consistent with the statistical analysis in the previous GBD 2016 study published in *The Lancet Neurology*.
