# Supplementary material for: Global, regional and national burden of traumatic brain injury and spinal cord injury, 1990–2019: a systematic analysis for the Global Burden of Disease Study 2019
Source: PubMed Central journal article supplement — BMJ Open. 2023 Oct 6;13(10):e075049. doi: 10.1136/bmjopen-2023-075049 (PMC10565269; doi:10.1136/bmjopen-2023-075049), 2023-10-06
Supplement: bmjopen-2023-075049supp014.pdf [file bmjopen-2023-075049supp014.pdf]

**eTable 7. Global Burden of Disease locational ISO3 code and Socio-demographic Index (SDI), 2019**

| <b>Location</b>                  | <b>ISO3 code</b> | <b>SDI</b> |
|----------------------------------|------------------|------------|
| Afghanistan                      | AFG              | 0.343      |
| Albania                          | ALB              | 0.681      |
| Algeria                          | DZA              | 0.652      |
| American Samoa                   | ASM              | 0.712      |
| Andorra                          | AND              | 0.894      |
| Angola                           | AGO              | 0.47       |
| Antigua and Barbuda              | ATG              | 0.743      |
| Argentina                        | ARG              | 0.708      |
| Armenia                          | ARM              | 0.689      |
| Australia                        | AUS              | 0.839      |
| Austria                          | AUT              | 0.849      |
| Azerbaijan                       | AZE              | 0.683      |
| Bahamas                          | BHS              | 0.796      |
| Bahrain                          | BHR              | 0.751      |
| Bangladesh                       | BGD              | 0.483      |
| Barbados                         | BRB              | 0.742      |
| Belarus                          | BLR              | 0.745      |
| Belgium                          | BEL              | 0.851      |
| Belize                           | BLZ              | 0.603      |
| Benin                            | BEN              | 0.352      |
| Bermuda                          | BMU              | 0.813      |
| Bhutan                           | BTN              | 0.455      |
| Bolivia (Plurinational State of) | BOL              | 0.566      |
| Bosnia and Herzegovina           | BIH              | 0.718      |
| Botswana                         | BWA              | 0.634      |
| Brazil                           | BRA              | 0.64       |
| Brunei Darussalam                | BRN              | 0.823      |
| Bulgaria                         | BGR              | 0.764      |
| Burkina Faso                     | BFA              | 0.257      |
| Burundi                          | BDI              | 0.284      |
| Cabo Verde                       | CPV              | 0.525      |
| Cambodia                         | KHM              | 0.469      |
| Cameroon                         | CMR              | 0.49       |
| Canada                           | CAN              | 0.873      |
| Central African Republic         | CAF              | 0.274      |
| Chad                             | TCD              | 0.238      |
| Chile                            | CHL              | 0.759      |
| China                            | CHN              | 0.686      |
| Colombia                         | COL              | 0.633      |
| Comoros                          | COM              | 0.455      |
| Congo                            | COG              | 0.568      |

| <b>Location</b>                       | <b>ISO3 code</b> | <b>SDI</b> |
|---------------------------------------|------------------|------------|
| Cook Islands                          | COK              | 0.764      |
| Costa Rica                            | CRI              | 0.68       |
| Croatia                               | HRV              | 0.794      |
| Cuba                                  | CUB              | 0.668      |
| Cyprus                                | CYP              | 0.841      |
| Czechia                               | CZE              | 0.828      |
| Côte d'Ivoire                         | CIV              | 0.408      |
| Democratic People's Republic of Korea | PRK              | 0.558      |
| Democratic Republic of the Congo      | COD              | 0.382      |
| Denmark                               | DNK              | 0.89       |
| Djibouti                              | DJI              | 0.459      |
| Dominica                              | DMA              | 0.729      |
| Dominican Republic                    | DOM              | 0.592      |
| Ecuador                               | ECU              | 0.64       |
| Egypt                                 | EGY              | 0.658      |
| El Salvador                           | SLV              | 0.573      |
| Equatorial Guinea                     | GNQ              | 0.685      |
| Eritrea                               | ERI              | 0.396      |
| Estonia                               | EST              | 0.835      |
| Eswatini                              | SWZ              | 0.577      |
| Ethiopia                              | ETH              | 0.343      |
| Fiji                                  | FJI              | 0.664      |
| Finland                               | FIN              | 0.856      |
| France                                | FRA              | 0.834      |
| Gabon                                 | GAB              | 0.656      |
| Gambia                                | GMB              | 0.399      |
| Georgia                               | GEO              | 0.702      |
| Germany                               | DEU              | 0.898      |
| Ghana                                 | GHA              | 0.557      |
| Greece                                | GRC              | 0.794      |
| Greenland                             | GRL              | 0.761      |
| Grenada                               | GRD              | 0.669      |
| Guam                                  | GUM              | 0.813      |
| Guatemala                             | GTM              | 0.526      |
| Guinea                                | GIN              | 0.325      |
| Guinea-Bissau                         | GNB              | 0.355      |
| Guyana                                | GUY              | 0.618      |
| Haiti                                 | HTI              | 0.432      |
| Honduras                              | HND              | 0.496      |
| Hungary                               | HUN              | 0.791      |
| Iceland                               | ISL              | 0.869      |
| India                                 | IND              | 0.566      |

| <b>Location</b>                  | <b>ISO3 code</b> | <b>SDI</b> |
|----------------------------------|------------------|------------|
| Indonesia                        | IDN              | 0.66       |
| Iran (Islamic Republic of)       | IRN              | 0.67       |
| Iraq                             | IRQ              | 0.671      |
| Ireland                          | IRL              | 0.867      |
| Israel                           | ISR              | 0.803      |
| Italy                            | ITA              | 0.801      |
| Jamaica                          | JAM              | 0.684      |
| Japan                            | JPN              | 0.87       |
| Jordan                           | JOR              | 0.731      |
| Kazakhstan                       | KAZ              | 0.723      |
| Kenya                            | KEN              | 0.508      |
| Kiribati                         | KIR              | 0.527      |
| Kuwait                           | KWT              | 0.851      |
| Kyrgyzstan                       | KGZ              | 0.596      |
| Lao People's Democratic Republic | LAO              | 0.49       |
| Latvia                           | LVA              | 0.82       |
| Lebanon                          | LBN              | 0.708      |
| Lesotho                          | LSO              | 0.507      |
| Liberia                          | LBR              | 0.37       |
| Libya                            | LBY              | 0.709      |
| Lithuania                        | LTU              | 0.843      |
| Luxembourg                       | LUX              | 0.895      |
| Madagascar                       | MDG              | 0.396      |
| Malawi                           | MWI              | 0.384      |
| Malaysia                         | MYS              | 0.737      |
| Maldives                         | MDV              | 0.562      |
| Mali                             | MLI              | 0.263      |
| Malta                            | MLT              | 0.801      |
| Marshall Islands                 | MHL              | 0.544      |
| Mauritania                       | MRT              | 0.496      |
| Mauritius                        | MUS              | 0.705      |
| Mexico                           | MEX              | 0.649      |
| Micronesia (Federated States of) | FSM              | 0.58       |
| Monaco                           | MCO              | 0.902      |
| Mongolia                         | MNG              | 0.606      |
| Montenegro                       | MNE              | 0.791      |
| Morocco                          | MAR              | 0.548      |
| Mozambique                       | MOZ              | 0.307      |
| Myanmar                          | MMR              | 0.521      |
| Namibia                          | NAM              | 0.612      |
| Nauru                            | NRU              | 0.618      |
| Nepal                            | NPL              | 0.422      |

| <b>Location</b>                  | <b>ISO3 code</b> | <b>SDI</b> |
|----------------------------------|------------------|------------|
| Netherlands                      | NLD              | 0.883      |
| New Zealand                      | NZL              | 0.84       |
| Nicaragua                        | NIC              | 0.517      |
| Niger                            | NER              | 0.162      |
| Nigeria                          | NGA              | 0.515      |
| Niue                             | NIU              | 0.711      |
| North Macedonia                  | MKD              | 0.744      |
| Northern Mariana Islands         | MNP              | 0.771      |
| Norway                           | NOR              | 0.913      |
| Oman                             | OMN              | 0.783      |
| Pakistan                         | PAK              | 0.449      |
| Palau                            | PLW              | 0.738      |
| Palestine                        | PSE              | 0.588      |
| Panama                           | PAN              | 0.686      |
| Papua New Guinea                 | PNG              | 0.394      |
| Paraguay                         | PRY              | 0.638      |
| Peru                             | PER              | 0.648      |
| Philippines                      | PHL              | 0.623      |
| Poland                           | POL              | 0.802      |
| Portugal                         | PRT              | 0.743      |
| Puerto Rico                      | PRI              | 0.814      |
| Qatar                            | QAT              | 0.83       |
| Republic of Korea                | KOR              | 0.878      |
| Republic of Moldova              | MDA              | 0.696      |
| Romania                          | ROU              | 0.76       |
| Russian Federation               | RUS              | 0.805      |
| Rwanda                           | RWA              | 0.429      |
| Saint Kitts and Nevis            | KNA              | 0.746      |
| Saint Lucia                      | LCA              | 0.67       |
| Saint Vincent and the Grenadines | VCT              | 0.627      |
| Samoa                            | WSM              | 0.641      |
| San Marino                       | SMR              | 0.884      |
| Sao Tome and Principe            | STP              | 0.502      |
| Saudi Arabia                     | SAU              | 0.805      |
| Senegal                          | SEN              | 0.389      |
| Serbia                           | SRB              | 0.767      |
| Seychelles                       | SYC              | 0.724      |
| Sierra Leone                     | SLE              | 0.347      |
| Singapore                        | SGP              | 0.861      |
| Slovakia                         | SVK              | 0.812      |
| Slovenia                         | SVN              | 0.84       |
| Solomon Islands                  | SLB              | 0.407      |

| <b>Location</b>                    | <b>ISO3 code</b> | <b>SDI</b> |
|------------------------------------|------------------|------------|
| Somalia                            | SOM              | 0.081      |
| South Africa                       | ZAF              | 0.678      |
| South Sudan                        | SSD              | 0.363      |
| Spain                              | ESP              | 0.767      |
| Sri Lanka                          | LKA              | 0.69       |
| Sudan                              | SDN              | 0.515      |
| Suriname                           | SUR              | 0.636      |
| Sweden                             | SWE              | 0.872      |
| Switzerland                        | CHE              | 0.929      |
| Syrian Arab Republic               | SYR              | 0.619      |
| Taiwan (Province of China)         | TWN              | 0.868      |
| Tajikistan                         | TJK              | 0.539      |
| Thailand                           | THA              | 0.687      |
| Timor-Leste                        | TLS              | 0.514      |
| Togo                               | TGO              | 0.417      |
| Tokelau                            | TKL              | 0.626      |
| Tonga                              | TON              | 0.636      |
| Trinidad and Tobago                | TTO              | 0.757      |
| Tunisia                            | TUN              | 0.672      |
| Turkey                             | TUR              | 0.748      |
| Turkmenistan                       | TKM              | 0.67       |
| Tuvalu                             | TUV              | 0.589      |
| Uganda                             | UGA              | 0.404      |
| Ukraine                            | UKR              | 0.736      |
| United Arab Emirates               | ARE              | 0.88       |
| United Kingdom                     | GBR              | 0.847      |
| United Republic of Tanzania        | TZA              | 0.423      |
| United States of America           | USA              | 0.859      |
| United States Virgin Islands       | VIR              | 0.799      |
| Uruguay                            | URY              | 0.697      |
| Uzbekistan                         | UZB              | 0.631      |
| Vanuatu                            | VUT              | 0.485      |
| Venezuela (Bolivarian Republic of) | VEN              | 0.607      |
| Viet Nam                           | VNM              | 0.617      |
| Yemen                              | YEM              | 0.412      |
| Zambia                             | ZMB              | 0.505      |
| Zimbabwe                           | ZWE              | 0.476      |
