# Supplementary material for: Global, regional and national burden of traumatic brain injury and spinal cord injury, 1990–2019: a systematic analysis for the Global Burden of Disease Study 2019
Source: PubMed Central journal article supplement — BMJ Open. 2023 Oct 6;13(10):e075049. doi: 10.1136/bmjopen-2023-075049 (PMC10565269; doi:10.1136/bmjopen-2023-075049), 2023-10-06
Supplement: bmjopen-2023-075049supp017.pdf [file bmjopen-2023-075049supp017.pdf]

eTable 10. Years lived with disability for 1990 and 2019 and percentage changes of age-standardized rates by location for traumatic brain injury, 1990–2019

| Location                         | YLD                          |                              |                                                |                  |                                                         |
|----------------------------------|------------------------------|------------------------------|------------------------------------------------|------------------|---------------------------------------------------------|
|                                  | Numbers<br>(95% UI)          |                              | Age-standardized rates per 100,000<br>(95% UI) |                  | Percentage change of age-standardized rates<br>(95% UI) |
|                                  | (Year 1990)                  | (Year 2019)                  | (Year 1990)                                    | (Year 2019)      | (Year 1990–Year 2019)                                   |
| <b>Global</b>                    | 3953933 (2777811 to 5334853) | 7076902 (4997948 to 9588098) | 86 (61 to 117)                                 | 87 (61 to 117)   | 0.1% (-1% to 1.3%)                                      |
| <b>High-income</b>               | 1014882 (712991 to 1373593)  | 1360583 (957111 to 1837205)  | 96 (67 to 130)                                 | 88 (61 to 118)   | -8.9% (-10.1% to -7.7%)                                 |
| <b>High-income North America</b> | 245962 (171414 to 333811)    | 342093 (241165 to 461325)    | 78 (54 to 106)                                 | 69 (48 to 93)    | -11.5% (-13% to -9.8%)                                  |
| Canada                           | 34042 (23793 to 46540)       | 58904 (41426 to 79662)       | 110 (77 to 151)                                | 107 (75 to 144)  | -3.2% (-6.9% to 0.8%)                                   |
| Greenland                        | 36 (25 to 50)                | 37 (26 to 49)                | 73 (51 to 99)                                  | 56 (39 to 75)    | -23.1% (-26.6% to -19.5%)                               |
| United States of America         | 211878 (147546 to 287094)    | 283146 (199948 to 381051)    | 75 (52 to 101)                                 | 65 (45 to 87)    | -13.5% (-15.1% to -11.9%)                               |
| <b>Australasia</b>               | 35580 (25007 to 48065)       | 62658 (44000 to 84416)       | 162 (114 to 219)                               | 166 (115 to 225) | 2.2% (-0.7% to 5.4%)                                    |
| Australia                        | 28806 (20192 to 38986)       | 51733 (36213 to 69985)       | 157 (110 to 212)                               | 162 (112 to 220) | 2.8% (-0.6% to 6.5%)                                    |
| New Zealand                      | 6774 (4757 to 9172)          | 10925 (7716 to 14864)        | 186 (131 to 252)                               | 187 (132 to 254) | 0.8% (-2.2% to 4.3%)                                    |
| <b>High-income Asia Pacific</b>  | 165215 (115479 to 223728)    | 222787 (156099 to 301904)    | 84 (59 to 114)                                 | 76 (53 to 104)   | -9.5% (-11.4% to -7.7%)                                 |
| Brunei Darussalam                | 214 (150 to 295)             | 408 (287 to 557)             | 110 (77 to 148)                                | 94 (67 to 128)   | -13.9% (-17.4% to -10.5%)                               |
| Japan                            | 112943 (78986 to 152999)     | 131214 (91583 to 177340)     | 73 (51 to 99)                                  | 61 (43 to 83)    | -16.3% (-17.7% to -14.9%)                               |

| Location              | YLD                       |                           |                                                |                  |                                                         |
|-----------------------|---------------------------|---------------------------|------------------------------------------------|------------------|---------------------------------------------------------|
|                       | Numbers<br>(95% UI)       |                           | Age-standardized rates per 100,000<br>(95% UI) |                  | Percentage change of age-standardized rates<br>(95% UI) |
|                       | (Year 1990)               | (Year 2019)               | (Year 1990)                                    | (Year 2019)      | (Year 1990–Year 2019)                                   |
| Republic of Korea     | 49224 (34429 to 66793)    | 84408 (58733 to 115371)   | 121 (85 to 165)                                | 111 (78 to 152)  | -8.5% (-12% to -4.9%)                                   |
| Singapore             | 2834 (1964 to 3874)       | 6757 (4714 to 9192)       | 94 (65 to 128)                                 | 92 (64 to 125)   | -2.3% (-6.4% to 1.8%)                                   |
| <b>Western Europe</b> | 521859 (366129 to 707104) | 655051 (458429 to 881035) | 110 (77 to 149)                                | 100 (70 to 136)  | -8.8% (-10.8% to -6.7%)                                 |
| Andorra               | 72 (50 to 97)             | 153 (107 to 208)          | 124 (87 to 168)                                | 126 (88 to 170)  | 1.5% (-2.4% to 5.6%)                                    |
| Austria               | 12269 (8528 to 16668)     | 14826 (10349 to 20156)    | 127 (88 to 173)                                | 112 (78 to 151)  | -12% (-15.6% to -8.1%)                                  |
| Belgium               | 15634 (10923 to 21080)    | 22555 (15827 to 30372)    | 125 (88 to 170)                                | 132 (91 to 178)  | 4.9% (0.8% to 9.2%)                                     |
| Cyprus                | 826 (581 to 1120)         | 1721 (1213 to 2332)       | 102 (72 to 138)                                | 104 (73 to 141)  | 1.7% (-3.1% to 6.2%)                                    |
| Denmark               | 7755 (5449 to 10493)      | 8047 (5630 to 10829)      | 116 (81 to 156)                                | 99 (69 to 135)   | -14.1% (-18% to -9.9%)                                  |
| Finland               | 9497 (6674 to 12879)      | 12214 (8542 to 16578)     | 155 (109 to 211)                               | 146 (101 to 198) | -6.2% (-9.9% to -2.4%)                                  |
| France                | 92736 (65233 to 125053)   | 122822 (85860 to 166276)  | 132 (93 to 178)                                | 122 (85 to 165)  | -7.7% (-11.7% to -3.9%)                                 |
| Germany               | 110220 (77245 to 149618)  | 135464 (94583 to 183616)  | 108 (75 to 146)                                | 102 (71 to 139)  | -4.9% (-8.9% to -0.4%)                                  |
| Greece                | 14192 (9960 to 19169)     | 14822 (10382 to 20098)    | 113 (79 to 152)                                | 99 (69 to 135)   | -12.1% (-15.9% to -8.2%)                                |
| Iceland               | 286 (201 to 388)          | 453 (317 to 610)          | 107 (75 to 145)                                | 103 (71 to 139)  | -4.3% (-8.4% to 0%)                                     |
| Ireland               | 3737 (2589 to 5076)       | 6046 (4161 to 8182)       | 101 (70 to 137)                                | 99 (68 to 134)   | -1.7% (-6.4% to 3%)                                     |
| Israel                | 4397 (3066 to 5955)       | 9508 (6760 to 13018)      | 93 (65 to 126)                                 | 96 (68 to 131)   | 3.1% (-2.3% to 8.9%)                                    |

| Location                      | YLD                     |                         |                                                |                 |                                                         |
|-------------------------------|-------------------------|-------------------------|------------------------------------------------|-----------------|---------------------------------------------------------|
|                               | Numbers<br>(95% UI)     |                         | Age-standardized rates per 100,000<br>(95% UI) |                 | Percentage change of age-standardized rates<br>(95% UI) |
|                               | (Year 1990)             | (Year 2019)             | (Year 1990)                                    | (Year 2019)     | (Year 1990–Year 2019)                                   |
| Italy                         | 86061 (60155 to 116787) | 93736 (66044 to 126346) | 118 (82 to 160)                                | 96 (67 to 131)  | -18.3% (-20% to -16.5%)                                 |
| Luxembourg                    | 615 (432 to 829)        | 963 (676 to 1301)       | 131 (92 to 177)                                | 115 (80 to 156) | -12% (-15.4% to -8.3%)                                  |
| Malta                         | 408 (287 to 553)        | 699 (489 to 938)        | 101 (71 to 136)                                | 111 (78 to 149) | 10% (5.2% to 14.8%)                                     |
| Monaco                        | 22 (16 to 30)           | 29 (20 to 39)           | 51 (36 to 69)                                  | 51 (36 to 70)   | 0.3% (-5% to 5.3%)                                      |
| Netherlands                   | 15909 (11173 to 21703)  | 25119 (17756 to 33892)  | 90 (63 to 123)                                 | 96 (68 to 130)  | 6.8% (2.1% to 11.5%)                                    |
| Norway                        | 3324 (2336 to 4499)     | 3921 (2761 to 5272)     | 63 (44 to 85)                                  | 53 (37 to 71)   | -15.8% (-17.6% to -13.8%)                               |
| Portugal                      | 12329 (8677 to 16672)   | 12024 (8572 to 16421)   | 105 (74 to 142)                                | 72 (51 to 99)   | -30.8% (-34.4% to -27.3%)                               |
| San Marino                    | 16 (11 to 21)           | 24 (17 to 32)           | 57 (40 to 77)                                  | 53 (37 to 72)   | -7.1% (-11.7% to -2.6%)                                 |
| Spain                         | 50036 (35096 to 67824)  | 65877 (45969 to 89448)  | 110 (77 to 149)                                | 97 (68 to 133)  | -11.9% (-16.4% to -7.3%)                                |
| Sweden                        | 6247 (4389 to 8442)     | 7003 (4895 to 9443)     | 56 (40 to 76)                                  | 48 (34 to 65)   | -14.1% (-17.9% to -10.1%)                               |
| Switzerland                   | 13892 (9797 to 18811)   | 17102 (12059 to 23120)  | 158 (111 to 214)                               | 130 (90 to 175) | -17.9% (-21.3% to -14.3%)                               |
| United Kingdom                | 60948 (42742 to 82260)  | 79351 (55900 to 107435) | 87 (61 to 118)                                 | 85 (59 to 115)  | -1.8% (-3.6% to 0%)                                     |
| <b>Southern Latin America</b> | 46267 (32375 to 62358)  | 77994 (55135 to 105285) | 97 (68 to 131)                                 | 104 (74 to 141) | 7.5% (4.2% to 11%)                                      |
| Argentina                     | 31020 (21788 to 41792)  | 50115 (35459 to 67528)  | 96 (68 to 130)                                 | 102 (72 to 137) | 6.1% (1.8% to 10.5%)                                    |
| Chile                         | 11380 (7906 to 15406)   | 23074 (16248 to 30963)  | 95 (66 to 128)                                 | 107 (75 to 144) | 12.8% (8.4% to 17.2%)                                   |

| Location                                                | YLD                        |                            |                                                |                  |                                                         |
|---------------------------------------------------------|----------------------------|----------------------------|------------------------------------------------|------------------|---------------------------------------------------------|
|                                                         | Numbers<br>(95% UI)        |                            | Age-standardized rates per 100,000<br>(95% UI) |                  | Percentage change of age-standardized rates<br>(95% UI) |
|                                                         | (Year 1990)                | (Year 2019)                | (Year 1990)                                    | (Year 2019)      | (Year 1990–Year 2019)                                   |
| Uruguay                                                 | 3865 (2698 to 5241)        | 4802 (3353 to 6507)        | 115 (80 to 156)                                | 116 (81 to 158)  | 1.2% (-3% to 5.6%)                                      |
| <b>Central Europe, Eastern Europe, and Central Asia</b> | 943958 (661605 to 1277133) | 913700 (644818 to 1239156) | 208 (146 to 282)                               | 173 (122 to 235) | -16.9% (-17.9% to -15.9%)                               |
| <b>Eastern Europe</b>                                   | 604907 (424334 to 817583)  | 536447 (376708 to 725229)  | 233 (164 to 316)                               | 193 (136 to 261) | -17.4% (-18.5% to -16.3%)                               |
| Belarus                                                 | 23518 (16376 to 32097)     | 22096 (15455 to 29994)     | 198 (138 to 271)                               | 173 (121 to 235) | -12.8% (-15.6% to -9.9%)                                |
| Estonia                                                 | 4277 (2978 to 5809)        | 2784 (1953 to 3788)        | 235 (164 to 319)                               | 154 (107 to 210) | -34.6% (-37% to -32.1%)                                 |
| Latvia                                                  | 8038 (5651 to 10926)       | 4361 (3084 to 5934)        | 255 (179 to 347)                               | 161 (114 to 220) | -36.9% (-39.1% to -34.7%)                               |
| Lithuania                                               | 10053 (7071 to 13649)      | 7172 (5059 to 9771)        | 242 (170 to 328)                               | 177 (124 to 241) | -26.7% (-29.1% to -24.2%)                               |
| Republic of Moldova                                     | 8505 (5924 to 11540)       | 6673 (4694 to 9089)        | 185 (129 to 252)                               | 138 (98 to 189)  | -25.4% (-27.9% to -22.7%)                               |
| Russian Federation                                      | 415551 (290189 to 561463)  | 387145 (272036 to 522377)  | 243 (170 to 329)                               | 200 (141 to 271) | -17.5% (-18.8% to -16.1%)                               |
| Ukraine                                                 | 134965 (95231 to 182486)   | 106217 (74659 to 143539)   | 216 (152 to 293)                               | 181 (127 to 245) | -16.1% (-18.6% to -13.5%)                               |
| <b>Central Europe</b>                                   | 278598 (195451 to 377346)  | 289346 (203891 to 392223)  | 204 (143 to 276)                               | 185 (130 to 251) | -9.2% (-10.6% to -7.7%)                                 |
| Albania                                                 | 4883 (3432 to 6644)        | 5913 (4153 to 8047)        | 174 (122 to 236)                               | 174 (122 to 238) | 0.2% (-3.5% to 3.6%)                                    |
| Bosnia and Herzegovina                                  | 7424 (5249 to 10029)       | 7966 (5840 to 10686)       | 158 (112 to 213)                               | 180 (131 to 242) | 14% (9.5% to 19.8%)                                     |
| Bulgaria                                                | 20529 (14452 to 27707)     | 16763 (11871 to 22686)     | 196 (137 to 266)                               | 178 (125 to 241) | -9.3% (-12.3% to -6.3%)                                 |
| Croatia                                                 | 13018 (9165 to 17568)      | 13031 (9190 to 17543)      | 225 (158 to 303)                               | 210 (147 to 284) | -6.7% (-10% to -3.7%)                                   |

| Location            | YLD                     |                          |                                                |                  |                                                         |
|---------------------|-------------------------|--------------------------|------------------------------------------------|------------------|---------------------------------------------------------|
|                     | Numbers<br>(95% UI)     |                          | Age-standardized rates per 100,000<br>(95% UI) |                  | Percentage change of age-standardized rates<br>(95% UI) |
|                     | (Year 1990)             | (Year 2019)              | (Year 1990)                                    | (Year 2019)      | (Year 1990–Year 2019)                                   |
| Czechia             | 27847 (19624 to 37900)  | 30328 (21306 to 41027)   | 232 (163 to 315)                               | 204 (142 to 277) | -11.8% (-14.7% to -8.7%)                                |
| Hungary             | 27345 (19336 to 37321)  | 24110 (16879 to 32515)   | 216 (152 to 295)                               | 175 (123 to 238) | -18.9% (-21.9% to -15.9%)                               |
| Montenegro          | 1188 (833 to 1615)      | 1451 (1015 to 1975)      | 184 (129 to 250)                               | 184 (129 to 250) | 0.1% (-3.1% to 3.1%)                                    |
| North Macedonia     | 3138 (2192 to 4235)     | 4402 (3104 to 5938)      | 153 (107 to 206)                               | 161 (113 to 217) | 5.7% (2.1% to 9.1%)                                     |
| Poland              | 86522 (60412 to 116964) | 101897 (71521 to 138435) | 208 (145 to 282)                               | 193 (135 to 262) | -7.5% (-9.4% to -5.7%)                                  |
| Romania             | 49979 (35005 to 67925)  | 43079 (30195 to 58391)   | 192 (133 to 261)                               | 165 (115 to 223) | -14% (-16.8% to -11.2%)                                 |
| Serbia              | 18768 (13173 to 25405)  | 19024 (13534 to 25615)   | 175 (123 to 238)                               | 167 (118 to 226) | -4.9% (-8.8% to -0.6%)                                  |
| Slovakia            | 11979 (8428 to 16274)   | 14550 (10196 to 19759)   | 212 (149 to 288)                               | 198 (138 to 270) | -6.4% (-9.3% to -3.2%)                                  |
| Slovenia            | 5978 (4228 to 8143)     | 6831 (4851 to 9290)      | 263 (186 to 359)                               | 223 (157 to 303) | -15.4% (-18% to -12.6%)                                 |
| <b>Central Asia</b> | 60453 (42819 to 81137)  | 87908 (62104 to 118441)  | 104 (74 to 140)                                | 96 (68 to 129)   | -7.9% (-9.8% to -6%)                                    |
| Armenia             | 5275 (3906 to 6815)     | 3855 (2879 to 5035)      | 162 (121 to 210)                               | 107 (80 to 139)  | -34.2% (-39.4% to -29.5%)                               |
| Azerbaijan          | 5777 (3992 to 7870)     | 9254 (6507 to 12554)     | 91 (63 to 123)                                 | 82 (57 to 111)   | -9.9% (-14.1% to -5.4%)                                 |
| Georgia             | 6836 (4788 to 9279)     | 5528 (3927 to 7487)      | 115 (81 to 156)                                | 122 (86 to 164)  | 5.7% (1% to 9.9%)                                       |
| Kazakhstan          | 17806 (12422 to 24221)  | 22119 (15369 to 29968)   | 118 (82 to 160)                                | 116 (80 to 156)  | -1.7% (-5.4% to 2.1%)                                   |
| Kyrgyzstan          | 3840 (2694 to 5235)     | 5357 (3746 to 7331)      | 106 (74 to 144)                                | 90 (63 to 123)   | -14.6% (-18.4% to -10.7%)                               |
| Mongolia            | 1364 (945 to 1859)      | 3614 (2527 to 4944)      | 88 (61 to 120)                                 | 108 (76 to 148)  | 23.6% (18.8% to 28.9%)                                  |

| Location                           | YLD                       |                           |                                                |                 |                                                         |
|------------------------------------|---------------------------|---------------------------|------------------------------------------------|-----------------|---------------------------------------------------------|
|                                    | Numbers<br>(95% UI)       |                           | Age-standardized rates per 100,000<br>(95% UI) |                 | Percentage change of age-standardized rates<br>(95% UI) |
|                                    | (Year 1990)               | (Year 2019)               | (Year 1990)                                    | (Year 2019)     | (Year 1990–Year 2019)                                   |
| Tajikistan                         | 3561 (2505 to 4843)       | 6424 (4676 to 8702)       | 94 (65 to 128)                                 | 79 (58 to 107)  | -15.4% (-20.4% to -7.8%)                                |
| Turkmenistan                       | 2302 (1611 to 3128)       | 3832 (2673 to 5211)       | 83 (58 to 112)                                 | 78 (54 to 105)  | -6.2% (-10.7% to -1.7%)                                 |
| Uzbekistan                         | 13692 (9568 to 18537)     | 27924 (19438 to 38027)    | 88 (61 to 119)                                 | 88 (61 to 120)  | 0.8% (-3.4% to 5.3%)                                    |
| <b>Latin America and Caribbean</b> | 202620 (142813 to 272345) | 373193 (262150 to 502419) | 66 (47 to 88)                                  | 61 (43 to 83)   | -6.6% (-8.6% to -4.9%)                                  |
| <b>Central Latin America</b>       | 102992 (73993 to 138066)  | 181186 (127975 to 243118) | 83 (59 to 110)                                 | 72 (51 to 97)   | -12.9% (-15.1% to -11.1%)                               |
| Colombia                           | 31423 (22333 to 42234)    | 49058 (34579 to 66389)    | 121 (86 to 162)                                | 96 (67 to 129)  | -21% (-24.8% to -17.4%)                                 |
| Costa Rica                         | 2074 (1433 to 2814)       | 4616 (3252 to 6244)       | 88 (61 to 119)                                 | 90 (64 to 122)  | 3.2% (-0.9% to 7.2%)                                    |
| El Salvador                        | 5041 (3605 to 6925)       | 6163 (4489 to 8066)       | 120 (87 to 163)                                | 101 (74 to 133) | -15.3% (-27% to -5.2%)                                  |
| Guatemala                          | 4717 (3396 to 6407)       | 11867 (8491 to 15982)     | 82 (59 to 110)                                 | 82 (58 to 110)  | -0.3% (-11.1% to 8.3%)                                  |
| Honduras                           | 2410 (1669 to 3256)       | 6477 (4576 to 8738)       | 75 (52 to 101)                                 | 80 (57 to 107)  | 6.2% (1.4% to 11.5%)                                    |
| Mexico                             | 38323 (26631 to 51746)    | 66975 (46700 to 90175)    | 61 (43 to 82)                                  | 53 (37 to 72)   | -12.8% (-14.3% to -11.4%)                               |
| Nicaragua                          | 2797 (1946 to 4012)       | 4465 (3234 to 5975)       | 100 (71 to 140)                                | 79 (57 to 105)  | -20.8% (-32.2% to -10.6%)                               |
| Panama                             | 1668 (1182 to 2235)       | 3399 (2382 to 4556)       | 85 (60 to 114)                                 | 81 (57 to 109)  | -4.9% (-9.2% to -0.5%)                                  |
| Venezuela (Bolivarian Republic of) | 14538 (10051 to 19674)    | 28166 (19857 to 38293)    | 99 (69 to 133)                                 | 95 (67 to 129)  | -4.1% (-8.1% to 0.1%)                                   |
| <b>Andean Latin America</b>        | 17095 (12192 to 23048)    | 38002 (26845 to 51360)    | 59 (42 to 79)                                  | 62 (44 to 84)   | 5.8% (1.3% to 10.1%)                                    |
| Bolivia (Plurinational State of)   | 2475 (1709 to 3360)       | 5668 (3998 to 7760)       | 53 (37 to 71)                                  | 54 (38 to 74)   | 2% (-3.6% to 7.7%)                                      |

| Location                         | YLD                    |                        |                                                |                |                                                         |
|----------------------------------|------------------------|------------------------|------------------------------------------------|----------------|---------------------------------------------------------|
|                                  | Numbers<br>(95% UI)    |                        | Age-standardized rates per 100,000<br>(95% UI) |                | Percentage change of age-standardized rates<br>(95% UI) |
|                                  | (Year 1990)            | (Year 2019)            | (Year 1990)                                    | (Year 2019)    | (Year 1990–Year 2019)                                   |
| Ecuador                          | 4968 (3561 to 6674)    | 11962 (8388 to 16108)  | 66 (47 to 89)                                  | 72 (51 to 97)  | 9.1% (3.8% to 14.4%)                                    |
| Peru                             | 9652 (6881 to 13116)   | 20373 (14499 to 27345) | 57 (41 to 78)                                  | 60 (43 to 81)  | 4.9% (-1.7% to 11.4%)                                   |
| <b>Caribbean</b>                 | 22600 (15774 to 30498) | 40644 (28816 to 54647) | 74 (52 to 100)                                 | 81 (57 to 109) | 9% (5.7% to 13.4%)                                      |
| Antigua and Barbuda              | 37 (25 to 50)          | 72 (51 to 98)          | 66 (46 to 90)                                  | 71 (50 to 96)  | 7.3% (2.2% to 12.3%)                                    |
| Bahamas                          | 157 (110 to 216)       | 310 (218 to 421)       | 72 (50 to 98)                                  | 75 (52 to 101) | 3.8% (-1.1% to 9%)                                      |
| Barbados                         | 166 (116 to 225)       | 252 (176 to 342)       | 64 (44 to 86)                                  | 66 (46 to 90)  | 3.8% (-1.4% to 9%)                                      |
| Belize                           | 95 (66 to 130)         | 298 (211 to 407)       | 73 (51 to 99)                                  | 82 (58 to 111) | 12.6% (7.8% to 17.7%)                                   |
| Bermuda                          | 36 (25 to 49)          | 45 (31 to 61)          | 54 (37 to 74)                                  | 50 (35 to 68)  | -6.6% (-11.8% to -1%)                                   |
| Cuba                             | 10126 (7061 to 13687)  | 14632 (10260 to 19851) | 94 (65 to 127)                                 | 93 (66 to 126) | -0.4% (-5.1% to 4.2%)                                   |
| Dominica                         | 42 (29 to 57)          | 55 (39 to 75)          | 64 (44 to 86)                                  | 70 (49 to 95)  | 10.1% (5.5% to 15%)                                     |
| Dominican Republic               | 3741 (2608 to 5083)    | 9454 (6610 to 12921)   | 69 (48 to 94)                                  | 90 (63 to 123) | 30% (24.1% to 36.1%)                                    |
| Grenada                          | 45 (32 to 61)          | 80 (56 to 108)         | 64 (45 to 85)                                  | 71 (50 to 96)  | 11.3% (3.9% to 18.3%)                                   |
| Guyana                           | 374 (264 to 510)       | 561 (392 to 763)       | 63 (44 to 85)                                  | 76 (53 to 103) | 20.2% (14.4% to 25.9%)                                  |
| Haiti                            | 2680 (1858 to 3638)    | 7284 (5476 to 9644)    | 56 (39 to 76)                                  | 69 (52 to 91)  | 23.2% (10.8% to 41.9%)                                  |
| Jamaica                          | 1176 (817 to 1584)     | 1858 (1294 to 2526)    | 59 (41 to 80)                                  | 62 (43 to 84)  | 4.8% (-0.7% to 10.9%)                                   |
| Puerto Rico                      | 2108 (1465 to 2874)    | 2444 (1722 to 3287)    | 58 (41 to 80)                                  | 51 (36 to 69)  | -12.5% (-17.1% to -7%)                                  |
| Saint Kitts and Nevis            | 17 (12 to 23)          | 34 (24 to 46)          | 47 (33 to 64)                                  | 50 (35 to 67)  | 8% (3.1% to 13.3%)                                      |
| Saint Lucia                      | 72 (50 to 98)          | 149 (105 to 202)       | 67 (47 to 91)                                  | 72 (51 to 98)  | 4.7% (-0.9% to 10.7%)                                   |
| Saint Vincent and the Grenadines | 51 (36 to 69)          | 84 (59 to 114)         | 60 (42 to 80)                                  | 66 (46 to 90)  | 10.6% (5% to 16.9%)                                     |
| Suriname                         | 222 (155 to 301)       | 432 (305 to 583)       | 67 (47 to 91)                                  | 71 (50 to 96)  | 5.5% (-1.5% to 11.3%)                                   |

| Location                                      | YLD                       |                             |                                                |                |                                                         |
|-----------------------------------------------|---------------------------|-----------------------------|------------------------------------------------|----------------|---------------------------------------------------------|
|                                               | Numbers<br>(95% UI)       |                             | Age-standardized rates per 100,000<br>(95% UI) |                | Percentage change of age-standardized rates<br>(95% UI) |
|                                               | (Year 1990)               | (Year 2019)                 | (Year 1990)                                    | (Year 2019)    | (Year 1990–Year 2019)                                   |
| Trinidad and Tobago                           | 647 (447 to 872)          | 1160 (818 to 1573)          | 62 (43 to 83)                                  | 70 (49 to 95)  | 13.5% (7.8% to 19.7%)                                   |
| United States Virgin Islands                  | 57 (40 to 79)             | 64 (45 to 87)               | 56 (39 to 76)                                  | 47 (33 to 64)  | -14.9% (-19.5% to -9.8%)                                |
| <b>Tropical Latin America</b>                 | 59933 (41675 to 80749)    | 113361 (79088 to 154099)    | 49 (34 to 65)                                  | 46 (32 to 63)  | -5.1% (-8.5% to -1.6%)                                  |
| Brazil                                        | 57701 (40149 to 77611)    | 108257 (75602 to 147092)    | 48 (33 to 64)                                  | 45 (32 to 61)  | -5.7% (-9.2% to -2.2%)                                  |
| Paraguay                                      | 2231 (1540 to 3049)       | 5103 (3604 to 6965)         | 74 (52 to 101)                                 | 78 (55 to 107) | 5.8% (0.9% to 10.9%)                                    |
| <b>Southeast Asia, East Asia, and Oceania</b> | 558047 (390436 to 759042) | 1403425 (994536 to 1907325) | 39 (27 to 52)                                  | 53 (38 to 72)  | 37.8% (35.3% to 40.5%)                                  |
| <b>East Asia</b>                              | 331950 (231139 to 451082) | 961990 (676389 to 1304904)  | 31 (22 to 42)                                  | 49 (34 to 66)  | 57.4% (53.8% to 61.4%)                                  |
| China                                         | 310524 (216428 to 421804) | 928651 (653288 to 1259096)  | 30 (21 to 41)                                  | 49 (34 to 66)  | 62.2% (58.4% to 66.3%)                                  |
| Democratic People's Republic of Korea         | 8365 (5757 to 11421)      | 14583 (10154 to 20004)      | 44 (30 to 59)                                  | 46 (32 to 63)  | 5.6% (-1% to 11.3%)                                     |
| Taiwan (Province of China)                    | 13062 (9050 to 17766)     | 18755 (13050 to 25434)      | 70 (49 to 95)                                  | 54 (38 to 74)  | -22.2% (-26.2% to -17.8%)                               |
| <b>Southeast Asia</b>                         | 223869 (157515 to 304129) | 435373 (313813 to 588454)   | 62 (44 to 84)                                  | 64 (46 to 86)  | 2.2% (-0.2% to 5%)                                      |
| Cambodia                                      | 4888 (3284 to 7407)       | 10450 (7541 to 14233)       | 67 (47 to 97)                                  | 72 (52 to 97)  | 7.1% (-14% to 22.2%)                                    |
| Indonesia                                     | 68162 (47545 to 93357)    | 111645 (79306 to 151466)    | 47 (33 to 65)                                  | 43 (30 to 58)  | -9.7% (-12.4% to -6.3%)                                 |
| Lao People's Democratic Republic              | 1835 (1274 to 2511)       | 3769 (2634 to 5135)         | 62 (43 to 84)                                  | 62 (44 to 85)  | 0.8% (-4.7% to 5.8%)                                    |



| Location                         | YLD                    |                         |                                                |                |                                                         |
|----------------------------------|------------------------|-------------------------|------------------------------------------------|----------------|---------------------------------------------------------|
|                                  | Numbers<br>(95% UI)    |                         | Age-standardized rates per 100,000<br>(95% UI) |                | Percentage change of age-standardized rates<br>(95% UI) |
|                                  | (Year 1990)            | (Year 2019)             | (Year 1990)                                    | (Year 2019)    | (Year 1990–Year 2019)                                   |
| Malaysia                         | 10197 (7057 to 13976)  | 25949 (18147 to 35442)  | 76 (53 to 104)                                 | 84 (59 to 115) | 10.3% (5.3% to 15.3%)                                   |
| Maldives                         | 74 (52 to 101)         | 284 (204 to 386)        | 53 (37 to 72)                                  | 60 (43 to 81)  | 12.5% (6.6% to 19.3%)                                   |
| Mauritius                        | 383 (267 to 524)       | 709 (497 to 965)        | 40 (28 to 54)                                  | 44 (31 to 61)  | 12.2% (4.5% to 19.1%)                                   |
| Myanmar                          | 20691 (14652 to 28025) | 37979 (28490 to 49831)  | 64 (46 to 87)                                  | 71 (53 to 93)  | 10.9% (2.5% to 24.2%)                                   |
| Philippines                      | 30614 (21882 to 41001) | 63439 (45829 to 85592)  | 68 (48 to 90)                                  | 65 (47 to 87)  | -4.1% (-6.3% to -2.2%)                                  |
| Seychelles                       | 27 (18 to 36)          | 56 (39 to 76)           | 43 (30 to 58)                                  | 48 (33 to 64)  | 10.9% (4.4% to 17.5%)                                   |
| Sri Lanka                        | 10643 (7574 to 14518)  | 21080 (15551 to 27555)  | 73 (52 to 99)                                  | 86 (64 to 113) | 18.1% (10.3% to 28.9%)                                  |
| Thailand                         | 42422 (29573 to 58447) | 70147 (49354 to 94871)  | 86 (61 to 118)                                 | 76 (53 to 103) | -12.6% (-16.4% to -8.8%)                                |
| Timor-Leste                      | 404 (288 to 557)       | 722 (530 to 963)        | 70 (51 to 94)                                  | 73 (53 to 97)  | 4.9% (-1.2% to 11.4%)                                   |
| Viet Nam                         | 33231 (23150 to 45336) | 88575 (62570 to 120852) | 66 (46 to 91)                                  | 86 (61 to 117) | 29.2% (23.7% to 35.1%)                                  |
| <b>Oceania</b>                   | 2228 (1554 to 3027)    | 6062 (4359 to 8110)     | 49 (34 to 67)                                  | 59 (42 to 79)  | 19.7% (14.7% to 25.6%)                                  |
| American Samoa                   | 13 (9 to 18)           | 20 (15 to 27)           | 39 (27 to 52)                                  | 38 (29 to 50)  | -0.6% (-8.2% to 10.3%)                                  |
| Cook Islands                     | 8 (5 to 10)            | 9 (7 to 12)             | 49 (35 to 67)                                  | 43 (30 to 58)  | -12.5% (-17.6% to -7.7%)                                |
| Fiji                             | 254 (176 to 347)       | 404 (285 to 550)        | 43 (30 to 59)                                  | 46 (32 to 62)  | 5.3% (-0.5% to 11.6%)                                   |
| Guam                             | 50 (35 to 68)          | 71 (49 to 96)           | 44 (31 to 60)                                  | 39 (27 to 53)  | -11.9% (-16.9% to -6.8%)                                |
| Kiribati                         | 19 (14 to 26)          | 36 (25 to 49)           | 34 (24 to 46)                                  | 36 (26 to 49)  | 5.7% (-1.6% to 12.9%)                                   |
| Marshall Islands                 | 13 (9 to 18)           | 25 (17 to 34)           | 50 (34 to 67)                                  | 51 (36 to 69)  | 3.6% (-1.8% to 9%)                                      |
| Micronesia (Federated States of) | 34 (24 to 47)          | 49 (34 to 66)           | 50 (35 to 67)                                  | 54 (38 to 73)  | 8.2% (2.2% to 14.5%)                                    |

| Location                            | YLD                       |                           |                                                |                 |                                                         |
|-------------------------------------|---------------------------|---------------------------|------------------------------------------------|-----------------|---------------------------------------------------------|
|                                     | Numbers<br>(95% UI)       |                           | Age-standardized rates per 100,000<br>(95% UI) |                 | Percentage change of age-standardized rates<br>(95% UI) |
|                                     | (Year 1990)               | (Year 2019)               | (Year 1990)                                    | (Year 2019)     | (Year 1990–Year 2019)                                   |
| Nauru                               | 3 (2 to 4)                | 3 (2 to 4)                | 41 (28 to 56)                                  | 40 (28 to 55)   | -1.4% (-7% to 5.1%)                                     |
| Niue                                | 1 (1 to 1)                | 1 (1 to 1)                | 37 (26 to 51)                                  | 39 (28 to 52)   | 4.2% (-2.8% to 11.9%)                                   |
| Northern Mariana Islands            | 19 (13 to 26)             | 22 (16 to 30)             | 53 (37 to 72)                                  | 42 (30 to 57)   | -20.1% (-24.4% to -15.6%)                               |
| Palau                               | 6 (4 to 8)                | 10 (7 to 14)              | 44 (31 to 59)                                  | 45 (32 to 61)   | 3.1% (-2.3% to 8.7%)                                    |
| Papua New Guinea                    | 1430 (996 to 1950)        | 4562 (3302 to 6098)       | 51 (36 to 69)                                  | 63 (45 to 84)   | 23% (16.5% to 30.4%)                                    |
| Samoa                               | 62 (43 to 84)             | 114 (84 to 150)           | 53 (37 to 72)                                  | 64 (47 to 85)   | 20.6% (13% to 30.8%)                                    |
| Solomon Islands                     | 112 (78 to 152)           | 284 (200 to 381)          | 53 (37 to 72)                                  | 60 (42 to 81)   | 12% (6.4% to 18.1%)                                     |
| Tokelau                             | 0 (0 to 1)                | 0 (0 to 1)                | 34 (23 to 46)                                  | 36 (25 to 48)   | 5.7% (0.1% to 12.2%)                                    |
| Tonga                               | 32 (23 to 44)             | 41 (29 to 55)             | 46 (33 to 63)                                  | 46 (33 to 63)   | 0.4% (-5.5% to 7.6%)                                    |
| Tuvalu                              | 3 (2 to 4)                | 4 (3 to 5)                | 34 (23 to 46)                                  | 36 (25 to 48)   | 16.2% (9.2% to 25%)                                     |
| Vanuatu                             | 46 (32 to 62)             | 120 (87 to 160)           | 45 (31 to 60)                                  | 52 (37 to 69)   | 5.9% (-0.4% to 13.1%)                                   |
| <b>North Africa and Middle East</b> | 201450 (145412 to 269033) | 453033 (331629 to 604021) | 79 (57 to 104)                                 | 80 (59 to 107)  | 1.9% (-3.5% to 5.4%)                                    |
| <b>North Africa and Middle East</b> | 201450 (145412 to 269033) | 453033 (331629 to 604021) | 79 (57 to 104)                                 | 80 (59 to 107)  | 1.9% (-3.5% to 5.4%)                                    |
| Afghanistan                         | 11856 (5273 to 28707)     | 25411 (16490 to 40529)    | 129 (60 to 299)                                | 106 (66 to 177) | -18.2% (-43.5% to 22.8%)                                |
| Algeria                             | 14814 (10463 to 20007)    | 29937 (21475 to 40072)    | 83 (58 to 112)                                 | 74 (53 to 99)   | -10.6% (-14.9% to -6%)                                  |
| Bahrain                             | 293 (204 to 395)          | 1239 (871 to 1704)        | 69 (48 to 93)                                  | 71 (50 to 97)   | 3.6% (-2.3% to 9.8%)                                    |
| Egypt                               | 24219 (16935 to 32991)    | 50341 (35383 to 68471)    | 56 (40 to 76)                                  | 59 (41 to 79)   | 4% (-2.1% to 10.7%)                                     |
| Iran (Islamic Republic of)          | 46118 (33452 to 61797)    | 70192 (52341 to 93184)    | 111 (81 to 147)                                | 80 (60 to 106)  | -28.1% (-34.8% to -23.2%)                               |

| Location             | YLD                    |                        |                                                |                  |                                                         |
|----------------------|------------------------|------------------------|------------------------------------------------|------------------|---------------------------------------------------------|
|                      | Numbers<br>(95% UI)    |                        | Age-standardized rates per 100,000<br>(95% UI) |                  | Percentage change of age-standardized rates<br>(95% UI) |
|                      | (Year 1990)            | (Year 2019)            | (Year 1990)                                    | (Year 2019)      | (Year 1990–Year 2019)                                   |
| Iraq                 | 15785 (10889 to 22572) | 37310 (26823 to 50871) | 132 (90 to 187)                                | 106 (76 to 143)  | -19.9% (-30.1% to -10.6%)                               |
| Jordan               | 1528 (1062 to 2076)    | 5884 (4095 to 7991)    | 62 (43 to 84)                                  | 59 (41 to 80)    | -3.9% (-8.6% to 1%)                                     |
| Kuwait               | 1316 (926 to 1822)     | 3711 (2638 to 5012)    | 92 (65 to 126)                                 | 81 (58 to 109)   | -12% (-18% to -6.7%)                                    |
| Lebanon              | 3035 (1991 to 4851)    | 4026 (2849 to 5569)    | 109 (72 to 173)                                | 76 (54 to 105)   | -30.4% (-42.8% to -18%)                                 |
| Libya                | 2352 (1663 to 3166)    | 6320 (4603 to 8529)    | 83 (59 to 112)                                 | 91 (66 to 123)   | 9.9% (3.2% to 18.6%)                                    |
| Morocco              | 14032 (9792 to 19007)  | 26514 (18727 to 35851) | 72 (50 to 98)                                  | 74 (52 to 100)   | 2.5% (-2.9% to 7.6%)                                    |
| Oman                 | 1432 (995 to 1957)     | 4246 (2938 to 5805)    | 106 (74 to 144)                                | 100 (70 to 136)  | -5.4% (-9.6% to -0.8%)                                  |
| Palestine            | 1291 (914 to 1828)     | 3728 (2642 to 5148)    | 88 (64 to 122)                                 | 97 (69 to 133)   | 10.2% (2.1% to 17.8%)                                   |
| Qatar                | 434 (302 to 599)       | 2857 (1994 to 3911)    | 109 (76 to 149)                                | 97 (68 to 132)   | -10.5% (-14.8% to -6.2%)                                |
| Saudi Arabia         | 13403 (9420 to 18276)  | 55075 (38616 to 75312) | 125 (88 to 170)                                | 156 (109 to 212) | 25% (20.1% to 29.7%)                                    |
| Sudan                | 4890 (3454 to 6758)    | 10734 (7768 to 14444)  | 35 (25 to 48)                                  | 37 (27 to 50)    | 4.9% (-1.9% to 12.7%)                                   |
| Syrian Arab Republic | 4817 (3388 to 6570)    | 15764 (10567 to 23012) | 56 (40 to 76)                                  | 116 (76 to 170)  | 107.7% (51.8% to 211.9%)                                |
| Tunisia              | 4665 (3256 to 6345)    | 9380 (6559 to 12772)   | 71 (49 to 96)                                  | 73 (51 to 99)    | 3.5% (-1.5% to 8.8%)                                    |
| Turkey               | 28204 (19754 to 38200) | 62842 (45196 to 84968) | 58 (41 to 79)                                  | 69 (50 to 93)    | 18.9% (12.6% to 26.1%)                                  |
| United Arab Emirates | 1418 (986 to 1951)     | 9976 (6962 to 13671)   | 92 (64 to 125)                                 | 87 (61 to 119)   | -4.9% (-9.5% to 0%)                                     |
| Yemen                | 5412 (3882 to 7267)    | 17087 (12086 to 23384) | 64 (46 to 87)                                  | 75 (54 to 101)   | 16.7% (4.8% to 33.9%)                                   |

| Location                           | YLD                        |                              |                                                |                  |                                                         |
|------------------------------------|----------------------------|------------------------------|------------------------------------------------|------------------|---------------------------------------------------------|
|                                    | Numbers<br>(95% UI)        |                              | Age-standardized rates per 100,000<br>(95% UI) |                  | Percentage change of age-standardized rates<br>(95% UI) |
|                                    | (Year 1990)                | (Year 2019)                  | (Year 1990)                                    | (Year 2019)      | (Year 1990–Year 2019)                                   |
| <b>South Asia</b>                  | 860069 (604623 to 1163495) | 2190818 (1536215 to 2967664) | 109 (77 to 147)                                | 135 (95 to 183)  | 24.4% (22.8% to 26.1%)                                  |
| <b>South Asia</b>                  | 860069 (604623 to 1163495) | 2190818 (1536215 to 2967664) | 109 (77 to 147)                                | 135 (95 to 183)  | 24.4% (22.8% to 26.1%)                                  |
| Bangladesh                         | 53822 (37633 to 73397)     | 137433 (96855 to 186188)     | 75 (52 to 102)                                 | 91 (64 to 123)   | 22% (16.9% to 27.6%)                                    |
| Bhutan                             | 364 (257 to 500)           | 802 (568 to 1096)            | 90 (63 to 123)                                 | 116 (82 to 158)  | 28.5% (23.3% to 34.2%)                                  |
| India                              | 742455 (522650 to 1003627) | 1870307 (1310196 to 2531657) | 118 (83 to 160)                                | 145 (102 to 196) | 22.9% (21.2% to 24.6%)                                  |
| Nepal                              | 10938 (7623 to 14857)      | 25880 (18657 to 34764)       | 81 (57 to 110)                                 | 98 (71 to 132)   | 20.5% (15.2% to 26.7%)                                  |
| Pakistan                           | 52490 (36788 to 71199)     | 156397 (110431 to 211564)    | 70 (49 to 95)                                  | 96 (68 to 129)   | 36% (32.2% to 40.3%)                                    |
| <b>Sub-Saharan Africa</b>          | 172908 (123072 to 233849)  | 382150 (275687 to 515793)    | 54 (39 to 74)                                  | 55 (39 to 73)    | 0.8% (-1.4% to 2.6%)                                    |
| <b>Southern Sub-Saharan Africa</b> | 18861 (13201 to 25332)     | 27272 (19047 to 36610)       | 51 (36 to 68)                                  | 40 (28 to 53)    | -22% (-24% to -20%)                                     |
| Botswana                           | 290 (201 to 397)           | 807 (560 to 1087)            | 34 (24 to 46)                                  | 40 (28 to 54)    | 19.6% (12.7% to 26.9%)                                  |
| Eswatini                           | 166 (116 to 225)           | 324 (226 to 442)             | 35 (24 to 47)                                  | 38 (27 to 51)    | 7.6% (1.7% to 14%)                                      |
| Lesotho                            | 395 (274 to 534)           | 664 (463 to 898)             | 31 (22 to 41)                                  | 38 (27 to 52)    | 25.3% (17.5% to 33.6%)                                  |
| Namibia                            | 446 (322 to 597)           | 848 (603 to 1142)            | 46 (33 to 61)                                  | 46 (33 to 61)    | -1% (-9.7% to 6.7%)                                     |
| South Africa                       | 15640 (10926 to 21082)     | 21643 (15178 to 28943)       | 57 (40 to 76)                                  | 41 (29 to 55)    | -27.1% (-29.1% to -24.8%)                               |
| Zimbabwe                           | 1923 (1333 to 2632)        | 2988 (2099 to 4074)          | 32 (22 to 43)                                  | 29 (20 to 39)    | -9.1% (-14.8% to -3.1%)                                 |

| Location                          | YLD                    |                           |                                                |               |                                                         |
|-----------------------------------|------------------------|---------------------------|------------------------------------------------|---------------|---------------------------------------------------------|
|                                   | Numbers<br>(95% UI)    |                           | Age-standardized rates per 100,000<br>(95% UI) |               | Percentage change of age-standardized rates<br>(95% UI) |
|                                   | (Year 1990)            | (Year 2019)               | (Year 1990)                                    | (Year 2019)   | (Year 1990–Year 2019)                                   |
| <b>Western Sub-Saharan Africa</b> | 56254 (39560 to 76157) | 146349 (103313 to 197859) | 47 (33 to 63)                                  | 52 (37 to 70) | 12.4% (11.1% to 14.1%)                                  |
| Benin                             | 1374 (955 to 1870)     | 4004 (2807 to 5466)       | 50 (35 to 68)                                  | 54 (38 to 73) | 8.8% (3.5% to 14.6%)                                    |
| Burkina Faso                      | 2600 (1819 to 3556)    | 7705 (5360 to 10461)      | 46 (32 to 62)                                  | 58 (40 to 78) | 25.2% (19.5% to 31.5%)                                  |
| Cabo Verde                        | 101 (70 to 137)        | 254 (177 to 344)          | 41 (29 to 56)                                  | 50 (35 to 68) | 22.4% (15.8% to 29.1%)                                  |
| Cameroon                          | 3755 (2637 to 5061)    | 11816 (8246 to 16095)     | 60 (42 to 81)                                  | 64 (46 to 88) | 7.8% (3.1% to 13%)                                      |
| Chad                              | 1764 (1273 to 2365)    | 4729 (3386 to 6432)       | 47 (34 to 63)                                  | 55 (40 to 74) | 17.9% (9.9% to 25.4%)                                   |
| Côte d'Ivoire                     | 3492 (2397 to 4736)    | 9078 (6327 to 12400)      | 52 (36 to 70)                                  | 54 (38 to 73) | 5.2% (0.1% to 10.7%)                                    |
| Gambia                            | 244 (173 to 331)       | 638 (451 to 866)          | 44 (31 to 59)                                  | 46 (33 to 63) | 5.5% (-0.3% to 10.9%)                                   |
| Ghana                             | 5052 (3515 to 6960)    | 15368 (10684 to 20817)    | 54 (38 to 73)                                  | 66 (46 to 89) | 22.3% (16.8% to 28.2%)                                  |
| Guinea                            | 1931 (1370 to 2598)    | 4240 (2937 to 5743)       | 47 (33 to 63)                                  | 55 (38 to 74) | 17.4% (11.5% to 23.4%)                                  |
| Guinea-Bissau                     | 361 (250 to 492)       | 754 (523 to 1012)         | 58 (41 to 79)                                  | 62 (43 to 84) | 6.1% (1.4% to 11.3%)                                    |
| Liberia                           | 782 (513 to 1233)      | 1578 (1139 to 2109)       | 53 (36 to 78)                                  | 49 (36 to 66) | -7.3% (-22.1% to 4.6%)                                  |
| Mali                              | 2508 (1739 to 3419)    | 6452 (4613 to 8736)       | 46 (32 to 62)                                  | 52 (37 to 70) | 12.8% (5.9% to 21.5%)                                   |
| Mauritania                        | 926 (640 to 1265)      | 1800 (1249 to 2459)       | 70 (49 to 95)                                  | 65 (46 to 89) | -6.2% (-10.4% to -1.6%)                                 |
| Niger                             | 1989 (1391 to 2690)    | 5650 (3980 to 7687)       | 45 (31 to 61)                                  | 47 (33 to 64) | 5.3% (-0.3% to 10.8%)                                   |
| Nigeria                           | 25033 (17488 to 33851) | 60912 (42958 to 82353)    | 43 (30 to 57)                                  | 47 (33 to 63) | 10.4% (8.8% to 12.8%)                                   |
| Sao Tome and Principe             | 36 (25 to 48)          | 82 (57 to 111)            | 45 (32 to 61)                                  | 55 (38 to 75) | 21.6% (15.4% to 28.1%)                                  |
| Senegal                           | 2061 (1436 to 2812)    | 5031 (3527 to 6891)       | 46 (32 to 62)                                  | 50 (35 to 68) | 9.1% (3.6% to 14.7%)                                    |
| Sierra Leone                      | 1105 (770 to 1503)     | 3084 (2249 to 4110)       | 45 (32 to 61)                                  | 58 (42 to 76) | 27.1% (17.3% to 41.7%)                                  |
| Togo                              | 1138 (798 to 1566)     | 3173 (2211 to 4304)       | 54 (38 to 74)                                  | 57 (40 to 77) | 4.4% (-0.3% to 9.1%)                                    |

| Location                          | YLD                     |                           |                                                |                 |                                                         |
|-----------------------------------|-------------------------|---------------------------|------------------------------------------------|-----------------|---------------------------------------------------------|
|                                   | Numbers<br>(95% UI)     |                           | Age-standardized rates per 100,000<br>(95% UI) |                 | Percentage change of age-standardized rates<br>(95% UI) |
|                                   | (Year 1990)             | (Year 2019)               | (Year 1990)                                    | (Year 2019)     | (Year 1990–Year 2019)                                   |
| <b>Eastern Sub-Saharan Africa</b> | 78366 (56234 to 106623) | 158772 (115632 to 212654) | 64 (46 to 86)                                  | 61 (44 to 81)   | -4.6% (-8.9% to -1.8%)                                  |
| Burundi                           | 2385 (1658 to 3269)     | 8672 (6103 to 12139)      | 67 (47 to 92)                                  | 111 (79 to 154) | 64.9% (29% to 133.1%)                                   |
| Comoros                           | 205 (145 to 279)        | 430 (301 to 588)          | 68 (48 to 93)                                  | 71 (50 to 97)   | 4.8% (0.1% to 9.6%)                                     |
| Djibouti                          | 166 (114 to 227)        | 546 (386 to 741)          | 59 (41 to 79)                                  | 59 (42 to 80)   | 0.9% (-4% to 6.5%)                                      |
| Eritrea                           | 2364 (1357 to 4220)     | 3231 (2346 to 4468)       | 104 (65 to 169)                                | 73 (54 to 102)  | -29.2% (-44.5% to -10.6%)                               |
| Ethiopia                          | 29635 (20754 to 41581)  | 46122 (32994 to 62059)    | 85 (61 to 117)                                 | 70 (51 to 93)   | -18.3% (-26.5% to -12%)                                 |
| Kenya                             | 8064 (5612 to 10876)    | 22105 (15512 to 29939)    | 61 (43 to 82)                                  | 64 (45 to 86)   | 4.7% (3.4% to 6.2%)                                     |
| Madagascar                        | 4160 (2888 to 5693)     | 9033 (6300 to 12243)      | 55 (38 to 74)                                  | 51 (36 to 69)   | -7.2% (-12.3% to -2.2%)                                 |
| Malawi                            | 2499 (1722 to 3363)     | 4867 (3373 to 6630)       | 41 (29 to 56)                                  | 41 (29 to 56)   | -0.3% (-5.5% to 5.4%)                                   |
| Mozambique                        | 6159 (4462 to 8610)     | 11785 (8413 to 15762)     | 69 (50 to 96)                                  | 69 (50 to 92)   | -0.2% (-15.2% to 10.8%)                                 |
| Rwanda                            | 3202 (2193 to 4400)     | 6728 (4867 to 9024)       | 71 (49 to 96)                                  | 75 (55 to 100)  | 6.4% (-8.7% to 37.8%)                                   |
| Somalia                           | 2245 (1540 to 3269)     | 6429 (4643 to 8636)       | 50 (34 to 69)                                  | 52 (38 to 70)   | 5.7% (-6.7% to 16%)                                     |
| South Sudan                       | 2292 (1640 to 3060)     | 3706 (2671 to 4957)       | 63 (45 to 83)                                  | 63 (45 to 83)   | 0% (-6.6% to 8%)                                        |
| Uganda                            | 5627 (4051 to 7768)     | 12677 (9152 to 16970)     | 52 (38 to 71)                                  | 54 (39 to 72)   | 2.7% (-10.1% to 12.9%)                                  |
| United Republic of Tanzania       | 7487 (5161 to 10080)    | 17639 (12368 to 24008)    | 47 (32 to 64)                                  | 48 (34 to 65)   | 2.8% (-2.6% to 8.2%)                                    |
| Zambia                            | 1817 (1268 to 2473)     | 4675 (3269 to 6385)       | 39 (27 to 53)                                  | 41 (29 to 56)   | 4.4% (-1.2% to 10.4%)                                   |
| <b>Central Sub-Saharan Africa</b> | 19427 (14018 to 26234)  | 49757 (36254 to 66187)    | 53 (38 to 71)                                  | 57 (42 to 77)   | 7.8% (3.3% to 13.1%)                                    |

| Location                         | YLD                   |                        |                                                |               |                                                         |
|----------------------------------|-----------------------|------------------------|------------------------------------------------|---------------|---------------------------------------------------------|
|                                  | Numbers<br>(95% UI)   |                        | Age-standardized rates per 100,000<br>(95% UI) |               | Percentage change of age-standardized rates<br>(95% UI) |
|                                  | (Year 1990)           | (Year 2019)            | (Year 1990)                                    | (Year 2019)   | (Year 1990–Year 2019)                                   |
| Angola                           | 5060 (3578 to 6975)   | 12323 (9051 to 16261)  | 69 (50 to 93)                                  | 66 (49 to 87) | -3.9% (-11.9% to 4.3%)                                  |
| Central African Republic         | 759 (532 to 1029)     | 2060 (1512 to 2777)    | 41 (29 to 56)                                  | 54 (40 to 71) | 29.1% (15.9% to 50.3%)                                  |
| Congo                            | 783 (546 to 1064)     | 2309 (1677 to 3084)    | 49 (34 to 67)                                  | 57 (42 to 76) | 17% (5.6% to 34.8%)                                     |
| Democratic Republic of the Congo | 12283 (8662 to 16696) | 31757 (22970 to 42327) | 50 (35 to 67)                                  | 55 (39 to 72) | 9.6% (2.6% to 19.6%)                                    |
| Equatorial Guinea                | 126 (88 to 169)       | 474 (334 to 646)       | 44 (31 to 59)                                  | 52 (37 to 71) | 18.4% (12.1% to 24.5%)                                  |
| Gabon                            | 418 (293 to 569)      | 834 (582 to 1128)      | 59 (41 to 79)                                  | 59 (41 to 80) | 0.8% (-3.8% to 6.1%)                                    |

Abbreviations: YLDs, years lived with disability; UI, uncertainty interval
