# Supplementary material for: Global, regional and national burden of traumatic brain injury and spinal cord injury, 1990–2019: a systematic analysis for the Global Burden of Disease Study 2019
Source: PubMed Central journal article supplement — BMJ Open. 2023 Oct 6;13(10):e075049. doi: 10.1136/bmjopen-2023-075049 (PMC10565269; doi:10.1136/bmjopen-2023-075049), 2023-10-06
Supplement: bmjopen-2023-075049supp019.pdf [file bmjopen-2023-075049supp019.pdf]

eTable 12. Prevalence of spinal cord injury in 1990 and 2019, and percentage changes of age-standardized estimates by location, 1990–2019

| Location                         | Prevalence                      |                                 |                                                    |                  |                                                             |
|----------------------------------|---------------------------------|---------------------------------|----------------------------------------------------|------------------|-------------------------------------------------------------|
|                                  | Numbers<br>(95% UI)             |                                 | Age-standardized estimates per 100,000<br>(95% UI) |                  | Percentage change of age-standardized<br>estimates (95% UI) |
|                                  | (Year 1990)                     | (Year 2019)                     | (Year 1990)                                        | (Year 2019)      | (Year 1990–Year 2019)                                       |
| <b>Global</b>                    | 11366799 (10375237 to 13112529) | 20635037 (18925876 to 23611174) | 239 (220 to 272)                                   | 253 (231 to 290) | 5.8% (2.7% to 9.6%)                                         |
| <b>High-income</b>               | 3309339 (3097968 to 3559963)    | 4658703 (4322688 to 5025979)    | 319 (298 to 343)                                   | 314 (293 to 339) | -1.6% (-3.2% to -0.1%)                                      |
| <b>High-income North America</b> | 1470807 (1362896 to 1596414)    | 2142480 (1965695 to 2332658)    | 468 (434 to 510)                                   | 438 (404 to 474) | -6.5% (-9.1% to -3.8%)                                      |
| Canada                           | 61362 (57616 to 66045)          | 104864 (98334 to 112454)        | 200 (188 to 215)                                   | 203 (191 to 218) | 1.5% (-1.3% to 4.2%)                                        |
| Greenland                        | 279 (257 to 306)                | 313 (288 to 341)                | 536 (495 to 584)                                   | 477 (437 to 518) | -11.1% (-13.9% to -8.8%)                                    |
| United States of America         | 1409133 (1303741 to 1532097)    | 2037268 (1865361 to 2222271)    | 497 (460 to 542)                                   | 465 (428 to 505) | -6.5% (-9.2% to -3.7%)                                      |
| <b>Australasia</b>               | 73943 (68140 to 82386)          | 128689 (118942 to 142726)       | 339 (312 to 378)                                   | 362 (331 to 405) | 6.8% (4.0% to 9.8%)                                         |
| Australia                        | 60172 (55261 to 67234)          | 106452 (98260 to 118061)        | 331 (304 to 370)                                   | 354 (323 to 397) | 7.0% (3.9% to 10.5%)                                        |
| New Zealand                      | 13771 (12703 to 15056)          | 22238 (20608 to 24554)          | 380 (350 to 416)                                   | 407 (374 to 452) | 7.0% (3.2% to 11.4%)                                        |
| <b>High-income Asia Pacific</b>  | 623896 (583531 to 673069)       | 859398 (798884 to 927726)       | 317 (297 to 342)                                   | 305 (283 to 328) | -3.9% (-5.7% to -1.8%)                                      |
| Brunei Darussalam                | 396 (371 to 425)                | 809 (759 to 862)                | 184 (173 to 196)                                   | 177 (167 to 188) | -4.0% (-7.1% to -0.9%)                                      |
| Japan                            | 526634 (490533 to 569215)       | 675897 (622213 to 733296)       | 347 (324 to 375)                                   | 342 (316 to 371) | -1.4% (-3.5% to 0.9%)                                       |

| Location              | Prevalence                  |                              |                                                    |                  |                                                             |
|-----------------------|-----------------------------|------------------------------|----------------------------------------------------|------------------|-------------------------------------------------------------|
|                       | Numbers<br>(95% UI)         |                              | Age-standardized estimates per 100,000<br>(95% UI) |                  | Percentage change of age-standardized<br>estimates (95% UI) |
|                       | (Year 1990)                 | (Year 2019)                  | (Year 1990)                                        | (Year 2019)      | (Year 1990–Year 2019)                                       |
| Republic of Korea     | 90930 (85259 to 96631)      | 168438 (158707 to 180809)    | 213 (200 to 225)                                   | 229 (216 to 247) | 7.9% (4.3% to 11.9%)                                        |
| Singapore             | 5936 (5540 to 6352)         | 14255 (13304 to 15272)       | 188 (176 to 201)                                   | 195 (182 to 209) | 3.6% (0.7% to 6.5%)                                         |
| <b>Western Europe</b> | 1047289 (982594 to 1125303) | 1374656 (1272365 to 1486731) | 229 (215 to 246)                                   | 233 (216 to 253) | 1.4% (-1.4% to 4.3%)                                        |
| Andorra               | 138 (129 to 149)            | 284 (265 to 307)             | 231 (216 to 249)                                   | 247 (230 to 268) | 6.9% (3.1% to 11.5%)                                        |
| Austria               | 22253 (20832 to 23942)      | 28169 (26147 to 30656)       | 240 (224 to 258)                                   | 232 (215 to 255) | -3.0% (-7.6% to 1.1%)                                       |
| Belgium               | 28809 (26945 to 31200)      | 41680 (38494 to 45149)       | 241 (225 to 263)                                   | 269 (248 to 294) | 11.5% (6.8% to 16.8%)                                       |
| Cyprus                | 1599 (1492 to 1730)         | 3506 (3240 to 3836)          | 196 (183 to 212)                                   | 217 (200 to 239) | 10.5% (5.0% to 16.9%)                                       |
| Denmark               | 13546 (12628 to 14620)      | 15769 (14579 to 17119)       | 214 (199 to 232)                                   | 213 (194 to 234) | -0.7% (-5.4% to 4.5%)                                       |
| Finland               | 18048 (16781 to 19591)      | 23401 (21471 to 25629)       | 305 (283 to 333)                                   | 313 (285 to 349) | 2.6% (-1.3% to 8.2%)                                        |
| France                | 164549 (154347 to 175895)   | 222331 (205901 to 240071)    | 244 (229 to 262)                                   | 248 (229 to 268) | 1.4% (-2.5% to 5.3%)                                        |
| Germany               | 200326 (187433 to 215127)   | 252232 (231248 to 274013)    | 205 (191 to 220)                                   | 214 (196 to 234) | 4.4% (-0.2% to 9.4%)                                        |
| Greece                | 26017 (24358 to 28055)      | 27838 (25879 to 30192)       | 214 (200 to 232)                                   | 203 (188 to 222) | -5% (-9.2% to -1.5%)                                        |
| Iceland               | 563 (527 to 606)            | 924 (853 to 1003)            | 213 (199 to 229)                                   | 221 (203 to 242) | 3.9% (-0.3% to 8.4%)                                        |

| Location       | Prevalence                |                           |                                                    |                  |                                                             |
|----------------|---------------------------|---------------------------|----------------------------------------------------|------------------|-------------------------------------------------------------|
|                | Numbers<br>(95% UI)       |                           | Age-standardized estimates per 100,000<br>(95% UI) |                  | Percentage change of age-standardized<br>estimates (95% UI) |
|                | (Year 1990)               | (Year 2019)               | (Year 1990)                                        | (Year 2019)      | (Year 1990–Year 2019)                                       |
| Ireland        | 7297 (6822 to 7883)       | 12722 (11716 to 13820)    | 199 (186 to 216)                                   | 218 (200 to 239) | 9.5% (5.1% to 13.8%)                                        |
| Israel         | 9064 (8381 to 9847)       | 23677 (19717 to 31856)    | 191 (176 to 207)                                   | 247 (204 to 337) | 29.8% (11.9% to 69.2%)                                      |
| Italy          | 152759 (143157 to 165237) | 167203 (155913 to 180891) | 218 (204 to 235)                                   | 193 (179 to 208) | -11.8% (-14.3% to -8.9%)                                    |
| Luxembourg     | 1098 (1035 to 1181)       | 1867 (1742 to 2028)       | 240 (226 to 259)                                   | 236 (219 to 256) | -1.9% (-6.2% to 2.3%)                                       |
| Malta          | 839 (776 to 919)          | 1394 (1284 to 1511)       | 208 (192 to 228)                                   | 240 (218 to 263) | 15.3% (10.9% to 20.5%)                                      |
| Monaco         | 180 (164 to 197)          | 257 (234 to 283)          | 428 (390 to 477)                                   | 488 (440 to 553) | 14.0% (9.9% to 19.1%)                                       |
| Netherlands    | 30052 (28101 to 32175)    | 45505 (42399 to 48825)    | 175 (163 to 188)                                   | 193 (180 to 208) | 10.5% (6.1% to 14.5%)                                       |
| Norway         | 25378 (23017 to 27724)    | 36099 (32427 to 39596)    | 486 (444 to 531)                                   | 503 (454 to 557) | 3.5% (0.5% to 7.0%)                                         |
| Portugal       | 23506 (21407 to 27259)    | 23534 (21821 to 26017)    | 207 (188 to 245)                                   | 156 (144 to 172) | -24.8% (-30.4% to -20.7%)                                   |
| San Marino     | 123 (113 to 135)          | 218 (198 to 241)          | 454 (416 to 501)                                   | 505 (457 to 568) | 11.3% (7.1% to 15.8%)                                       |
| Spain          | 86830 (81809 to 92631)    | 129596 (120047 to 140357) | 197 (185 to 210)                                   | 208 (192 to 228) | 5.7% (-0.3% to 11.6%)                                       |
| Sweden         | 53249 (48329 to 58425)    | 72301 (65044 to 79382)    | 489 (447 to 539)                                   | 515 (464 to 573) | 5.3% (2.1% to 8.9%)                                         |
| Switzerland    | 25301 (23630 to 27371)    | 32541 (29900 to 35495)    | 300 (280 to 323)                                   | 272 (248 to 300) | -9.3% (-13.3% to -4.0%)                                     |
| United Kingdom | 154893 (144548 to 166794) | 210409 (194954 to 228369) | 231 (216 to 250)                                   | 243 (225 to 265) | 5.1% (2.2% to 8.0%)                                         |

| Location                                                | Prevalence                   |                              |                                                    |                  |                                                             |
|---------------------------------------------------------|------------------------------|------------------------------|----------------------------------------------------|------------------|-------------------------------------------------------------|
|                                                         | Numbers<br>(95% UI)          |                              | Age-standardized estimates per 100,000<br>(95% UI) |                  | Percentage change of age-standardized<br>estimates (95% UI) |
|                                                         | (Year 1990)                  | (Year 2019)                  | (Year 1990)                                        | (Year 2019)      | (Year 1990–Year 2019)                                       |
| <b>Southern Latin America</b>                           | 93403 (86234 to 104555)      | 153480 (143685 to 165038)    | 194 (179 to 216)                                   | 209 (195 to 225) | 7.7% (0.5% to 12.3%)                                        |
| Argentina                                               | 63830 (57864 to 74714)       | 99369 (92357 to 107852)      | 197 (179 to 230)                                   | 205 (190 to 223) | 3.8% (-5.3% to 9.4%)                                        |
| Chile                                                   | 22612 (21262 to 24053)       | 45271 (42649 to 48478)       | 182 (172 to 193)                                   | 215 (202 to 231) | 18.2% (14.5% to 22.3%)                                      |
| Uruguay                                                 | 6957 (6534 to 7440)          | 8832 (8331 to 9435)          | 212 (198 to 227)                                   | 223 (210 to 239) | 5.5% (1.9% to 9.1%)                                         |
| <b>Central Europe, Eastern Europe, and Central Asia</b> | 1454386 (1361320 to 1563953) | 1470355 (1367128 to 1601720) | 325 (304 to 349)                                   | 291 (270 to 317) | -10.5% (-13.3% to -5.1%)                                    |
| <b>Eastern Europe</b>                                   | 899009 (838179 to 972430)    | 805575 (746346 to 876551)    | 354 (330 to 382)                                   | 305 (282 to 333) | -13.9% (-16.5% to -9.0%)                                    |
| Belarus                                                 | 35844 (33576 to 38509)       | 35199 (33016 to 38065)       | 309 (289 to 332)                                   | 290 (272 to 313) | -6.1% (-8.7% to -3.2%)                                      |
| Estonia                                                 | 6363 (5922 to 6860)          | 4627 (4341 to 4987)          | 358 (333 to 385)                                   | 273 (255 to 293) | -23.9% (-27.0% to -20.9%)                                   |
| Latvia                                                  | 11684 (10953 to 12620)       | 6847 (6438 to 7434)          | 382 (358 to 412)                                   | 273 (256 to 295) | -28.6% (-31.3% to -25.9%)                                   |
| Lithuania                                               | 14772 (13822 to 15932)       | 11184 (10535 to 12051)       | 362 (338 to 390)                                   | 297 (279 to 321) | -17.8% (-20.3% to -14.8%)                                   |
| Republic of Moldova                                     | 12807 (12015 to 13711)       | 11018 (10315 to 11881)       | 279 (262 to 299)                                   | 239 (223 to 257) | -14.5% (-17.6% to -11.2%)                                   |
| Russian Federation                                      | 608061 (566008 to 658182)    | 575291 (532592 to 628058)    | 361 (336 to 390)                                   | 313 (289 to 343) | -13.4% (-16.5% to -8.1%)                                    |
| Ukraine                                                 | 209478 (194928 to 226542)    | 161409 (149366 to 177092)    | 346 (322 to 374)                                   | 292 (269 to 321) | -15.6% (-18.7% to -10.7%)                                   |

| Location               | Prevalence                |                           |                                                    |                  |                                                             |
|------------------------|---------------------------|---------------------------|----------------------------------------------------|------------------|-------------------------------------------------------------|
|                        | Numbers<br>(95% UI)       |                           | Age-standardized estimates per 100,000<br>(95% UI) |                  | Percentage change of age-standardized<br>estimates (95% UI) |
|                        | (Year 1990)               | (Year 2019)               | (Year 1990)                                        | (Year 2019)      | (Year 1990–Year 2019)                                       |
| <b>Central Europe</b>  | 439972 (412747 to 471841) | 489513 (456513 to 533815) | 326 (306 to 350)                                   | 332 (308 to 363) | 1.8% (-1.4% to 6.8%)                                        |
| Albania                | 8866 (8151 to 9594)       | 10877 (9969 to 12120)     | 306 (282 to 330)                                   | 332 (303 to 375) | 8.7% (2.5% to 20.1%)                                        |
| Bosnia and Herzegovina | 14423 (12916 to 17202)    | 20410 (14633 to 35167)    | 302 (271 to 363)                                   | 491 (349 to 860) | 62.4% (25.7% to 136.1%)                                     |
| Bulgaria               | 32719 (30682 to 35010)    | 26946 (25037 to 29240)    | 325 (304 to 348)                                   | 308 (284 to 334) | -5.3% (-8.7% to -2.7%)                                      |
| Croatia                | 19846 (18467 to 21281)    | 21217 (19643 to 23395)    | 350 (325 to 375)                                   | 369 (339 to 408) | 5.6% (0.1% to 14.4%)                                        |
| Czechia                | 42455 (39887 to 45742)    | 51155 (47808 to 55398)    | 362 (340 to 390)                                   | 366 (340 to 397) | 1.0% (-2.5% to 5.0%)                                        |
| Hungary                | 40571 (38006 to 43552)    | 40177 (37422 to 43691)    | 332 (310 to 357)                                   | 316 (293 to 343) | -5.0% (-8.6% to -0.2%)                                      |
| Montenegro             | 2028 (1896 to 2178)       | 2449 (2288 to 2656)       | 313 (292 to 336)                                   | 324 (302 to 352) | 3.5% (0.4% to 6.9%)                                         |
| North Macedonia        | 5347 (4945 to 5725)       | 7655 (7103 to 8316)       | 257 (238 to 275)                                   | 289 (267 to 314) | 12.2% (8.3% to 16.7%)                                       |
| Poland                 | 132249 (123697 to 142241) | 163770 (153262 to 177622) | 322 (301 to 346)                                   | 327 (305 to 354) | 1.5% (-1.1% to 4.0%)                                        |
| Romania                | 83378 (78152 to 89666)    | 72662 (67894 to 78563)    | 327 (306 to 352)                                   | 297 (276 to 323) | -9.3% (-12.4% to -6.2%)                                     |
| Serbia                 | 30163 (28050 to 32472)    | 36205 (31742 to 45108)    | 287 (265 to 308)                                   | 341 (296 to 435) | 19.0% (5.7% to 49.8%)                                       |
| Slovakia               | 18681 (17476 to 20094)    | 24557 (22989 to 26578)    | 333 (311 to 359)                                   | 349 (326 to 379) | 4.9% (1.9% to 8.4%)                                         |

| Location                           | Prevalence                 |                              |                                                    |                  |                                                             |
|------------------------------------|----------------------------|------------------------------|----------------------------------------------------|------------------|-------------------------------------------------------------|
|                                    | Numbers<br>(95% UI)        |                              | Age-standardized estimates per 100,000<br>(95% UI) |                  | Percentage change of age-standardized<br>estimates (95% UI) |
|                                    | (Year 1990)                | (Year 2019)                  | (Year 1990)                                        | (Year 2019)      | (Year 1990–Year 2019)                                       |
| Slovenia                           | 9245 (8607 to 9977)        | 11433 (10655 to 12393)       | 413 (384 to 445)                                   | 401 (373 to 435) | -2.9% (-6.6% to 0.8%)                                       |
| <b>Central Asia</b>                | 115405 (107057 to 125666)  | 175268 (159927 to 201702)    | 191 (178 to 208)                                   | 186 (170 to 212) | -2.7% (-9.8% to 10.6%)                                      |
| Armenia                            | 15954 (10905 to 25069)     | 9408 (7488 to 12854)         | 483 (332 to 766)                                   | 264 (212 to 358) | -45.3% (-53.4% to -34.9%)                                   |
| Azerbaijan                         | 10359 (9704 to 11027)      | 19475 (17317 to 23953)       | 156 (147 to 166)                                   | 169 (151 to 205) | 8.1% (-1.5% to 30.6%)                                       |
| Georgia                            | 11614 (10921 to 12425)     | 10030 (9083 to 11840)        | 199 (187 to 212)                                   | 236 (211 to 282) | 18.5% (8.9% to 40.7%)                                       |
| Kazakhstan                         | 31263 (29228 to 33341)     | 39097 (36469 to 42064)       | 201 (188 to 215)                                   | 203 (190 to 218) | 1.0% (-1.4% to 3.2%)                                        |
| Kyrgyzstan                         | 6759 (6335 to 7180)        | 10187 (9455 to 11006)        | 179 (168 to 190)                                   | 165 (154 to 178) | -7.7% (-11% to -2.5%)                                       |
| Mongolia                           | 2544 (2390 to 2715)        | 6391 (5970 to 6861)          | 151 (142 to 161)                                   | 184 (172 to 198) | 22.3% (18.4% to 26.1%)                                      |
| Tajikistan                         | 6617 (6202 to 7080)        | 20651 (13792 to 38620)       | 165 (155 to 176)                                   | 237 (160 to 436) | 43.8% (-1.4% to 165.1%)                                     |
| Turkmenistan                       | 4278 (4001 to 4543)        | 7701 (7145 to 8470)          | 144 (135 to 153)                                   | 152 (141 to 167) | 5.7% (0.9% to 13.5%)                                        |
| Uzbekistan                         | 26017 (24383 to 27765)     | 52328 (48703 to 55999)       | 157 (148 to 167)                                   | 158 (147 to 168) | 0.5% (-2.7% to 3.7%)                                        |
| <b>Latin America and Caribbean</b> | 945885 (843370 to 1108550) | 1654334 (1525342 to 1823896) | 288 (260 to 329)                                   | 271 (250 to 299) | -5.8% (-11.6% to -1.4%)                                     |
| <b>Central Latin America</b>       | 422080 (355172 to 564287)  | 656424 (594640 to 761640)    | 311 (271 to 394)                                   | 259 (235 to 300) | -16.8% (-24.4% to -12%)                                     |

| Location                           | Prevalence                |                           |                                                    |                  |                                                             |
|------------------------------------|---------------------------|---------------------------|----------------------------------------------------|------------------|-------------------------------------------------------------|
|                                    | Numbers<br>(95% UI)       |                           | Age-standardized estimates per 100,000<br>(95% UI) |                  | Percentage change of age-standardized<br>estimates (95% UI) |
|                                    | (Year 1990)               | (Year 2019)               | (Year 1990)                                        | (Year 2019)      | (Year 1990–Year 2019)                                       |
| Colombia                           | 62172 (54456 to 74082)    | 100259 (86297 to 132383)  | 220 (196 to 254)                                   | 196 (169 to 259) | -10.5% (-18.7% to 3.4%)                                     |
| Costa Rica                         | 3776 (3499 to 4080)       | 8130 (7657 to 8739)       | 149 (139 to 160)                                   | 160 (151 to 172) | 7.5% (4.5% to 10.5%)                                        |
| El Salvador                        | 34391 (12461 to 90889)    | 20241 (11797 to 42493)    | 671 (263 to 1743)                                  | 337 (193 to 718) | -49.8% (-59.1% to -26%)                                     |
| Guatemala                          | 21796 (10355 to 49254)    | 29872 (22956 to 46810)    | 308 (158 to 673)                                   | 198 (149 to 318) | -35.6% (-53.6% to -4.6%)                                    |
| Honduras                           | 4381 (4085 to 4715)       | 14252 (12544 to 16931)    | 125 (118 to 133)                                   | 165 (146 to 198) | 32.3% (18.9% to 56.1%)                                      |
| Mexico                             | 241316 (222816 to 264653) | 404685 (374488 to 442322) | 365 (338 to 399)                                   | 319 (295 to 348) | -12.7% (-14.5% to -11.1%)                                   |
| Nicaragua                          | 25022 (7657 to 67214)     | 19884 (9920 to 43869)     | 667 (232 to 1742)                                  | 342 (167 to 760) | -48.7% (-56.3% to -26.6%)                                   |
| Panama                             | 3415 (2840 to 5443)       | 6453 (5833 to 7965)       | 161 (137 to 240)                                   | 154 (139 to 190) | -4.3% (-21.7% to 4.6%)                                      |
| Venezuela (Bolivarian Republic of) | 25812 (23940 to 27785)    | 52649 (47953 to 58203)    | 163 (152 to 174)                                   | 177 (161 to 196) | 9.1% (2.4% to 19.3%)                                        |
| <b>Andean Latin America</b>        | 45203 (35649 to 68463)    | 84038 (74358 to 105119)   | 137 (113 to 195)                                   | 136 (120 to 169) | -1.2% (-13.2% to 7.9%)                                      |
| Bolivia (Plurinational State of)   | 4761 (4505 to 5045)       | 11226 (10592 to 11990)    | 93 (89 to 98)                                      | 103 (97 to 109)  | 10.4% (6.8% to 14.2%)                                       |
| Ecuador                            | 10497 (9440 to 12158)     | 23004 (21613 to 24784)    | 129 (117 to 147)                                   | 136 (127 to 146) | 5.4% (-1.9% to 11.3%)                                       |
| Peru                               | 29944 (20967 to 51939)    | 49807 (41420 to 70628)    | 154 (114 to 249)                                   | 146 (121 to 205) | -5.4% (-19.7% to 7.5%)                                      |

| Location                         | Prevalence             |                          |                                                    |                  |                                                             |
|----------------------------------|------------------------|--------------------------|----------------------------------------------------|------------------|-------------------------------------------------------------|
|                                  | Numbers<br>(95% UI)    |                          | Age-standardized estimates per 100,000<br>(95% UI) |                  | Percentage change of age-standardized<br>estimates (95% UI) |
|                                  | (Year 1990)            | (Year 2019)              | (Year 1990)                                        | (Year 2019)      | (Year 1990–Year 2019)                                       |
| <b>Caribbean</b>                 | 45566 (43184 to 48167) | 118136 (93316 to 165454) | 145 (138 to 153)                                   | 239 (188 to 336) | 64.8% (29.1% to 131.2%)                                     |
| Antigua and Barbuda              | 64 (60 to 68)          | 133 (124 to 142)         | 113 (106 to 120)                                   | 131 (123 to 140) | 16.2% (13.2% to 19.6%)                                      |
| Bahamas                          | 251 (236 to 266)       | 513 (487 to 543)         | 107 (102 to 113)                                   | 123 (117 to 130) | 14.8% (10.7% to 18.7%)                                      |
| Barbados                         | 272 (255 to 289)       | 426 (403 to 451)         | 105 (98 to 111)                                    | 117 (111 to 124) | 12.0% (8.4% to 15.3%)                                       |
| Belize                           | 166 (153 to 184)       | 525 (488 to 578)         | 118 (110 to 129)                                   | 138 (128 to 152) | 16.5% (12.4% to 21.5%)                                      |
| Bermuda                          | 165 (154 to 177)       | 259 (242 to 278)         | 248 (232 to 266)                                   | 297 (277 to 319) | 19.7% (15.2% to 24.9%)                                      |
| Cuba                             | 16409 (15431 to 17403) | 23861 (22638 to 25300)   | 150 (141 to 158)                                   | 162 (153 to 171) | 8.3% (3.6% to 12.4%)                                        |
| Dominica                         | 71 (65 to 82)          | 101 (91 to 117)          | 107 (98 to 122)                                    | 131 (119 to 150) | 22.5% (9.8% to 39.5%)                                       |
| Dominican Republic               | 6180 (5782 to 6599)    | 14734 (13824 to 15659)   | 107 (101 to 114)                                   | 138 (130 to 146) | 28.4% (24.5% to 32.9%)                                      |
| Grenada                          | 102 (77 to 169)        | 149 (137 to 171)         | 136 (104 to 218)                                   | 133 (122 to 153) | -2.1% (-29.9% to 20.1%)                                     |
| Guyana                           | 710 (663 to 781)       | 973 (916 to 1048)        | 107 (101 to 117)                                   | 127 (120 to 137) | 18.5% (14.7% to 21.7%)                                      |
| Haiti                            | 4542 (4299 to 4839)    | 49888 (26327 to 93675)   | 88 (83 to 93)                                      | 431 (230 to 813) | 391% (164.9% to 805.4%)                                     |
| Jamaica                          | 2379 (2231 to 2558)    | 3502 (3305 to 3721)      | 116 (109 to 124)                                   | 117 (111 to 125) | 1.1% (-1.7% to 3.9%)                                        |
| Puerto Rico                      | 10610 (9955 to 11350)  | 15476 (14251 to 17427)   | 293 (275 to 313)                                   | 330 (303 to 374) | 12.6% (5.7% to 25.2%)                                       |
| Saint Kitts and Nevis            | 77 (72 to 82)          | 174 (163 to 186)         | 213 (200 to 226)                                   | 257 (241 to 276) | 21.1% (17.0% to 25.0%)                                      |
| Saint Lucia                      | 121 (113 to 131)       | 255 (240 to 270)         | 107 (100 to 115)                                   | 126 (119 to 134) | 17.7% (13.2% to 21.8%)                                      |
| Saint Vincent and the Grenadines | 93 (87 to 99)          | 147 (139 to 156)         | 102 (96 to 109)                                    | 117 (111 to 125) | 14.9% (10.4% to 19.9%)                                      |
| Suriname                         | 445 (366 to 702)       | 759 (696 to 904)         | 126 (106 to 190)                                   | 125 (115 to 147) | -1.0% (-23.1% to 10.7%)                                     |
| Trinidad and Tobago              | 1133 (1056 to 1227)    | 1950 (1844 to 2084)      | 103 (96 to 111)                                    | 121 (114 to 129) | 17.3% (13.6% to 20.4%)                                      |



| Location                                      | Prevalence                   |                              |                                                    |                  |                                                             |
|-----------------------------------------------|------------------------------|------------------------------|----------------------------------------------------|------------------|-------------------------------------------------------------|
|                                               | Numbers<br>(95% UI)          |                              | Age-standardized estimates per 100,000<br>(95% UI) |                  | Percentage change of age-standardized<br>estimates (95% UI) |
|                                               | (Year 1990)                  | (Year 2019)                  | (Year 1990)                                        | (Year 2019)      | (Year 1990–Year 2019)                                       |
| United States Virgin Islands                  | 260 (244 to 276)             | 310 (294 to 330)             | 250 (235 to 266)                                   | 241 (229 to 256) | -3.4% (-6.9% to 0.2%)                                       |
| <b>Tropical Latin America</b>                 | 433036 (398417 to 474467)    | 795736 (733802 to 868808)    | 333 (308 to 363)                                   | 325 (299 to 355) | -2.5% (-5.4% to 0.3%)                                       |
| Brazil                                        | 428811 (394414 to 470171)    | 786832 (725507 to 859364)    | 338 (312 to 369)                                   | 330 (304 to 360) | -2.4% (-5.3% to 0.5%)                                       |
| Paraguay                                      | 4224 (3901 to 4636)          | 8904 (8300 to 9587)          | 133 (124 to 144)                                   | 133 (125 to 143) | 0.2% (-3.4% to 3.3%)                                        |
| <b>Southeast Asia, East Asia, and Oceania</b> | 2869879 (2659889 to 3149019) | 6408788 (5994232 to 6934620) | 189 (176 to 207)                                   | 245 (229 to 265) | 29.5% (24.5% to 33.7%)                                      |
| <b>East Asia</b>                              | 2174815 (2017401 to 2348060) | 5147994 (4799710 to 5551476) | 193 (180 to 208)                                   | 266 (249 to 287) | 38.0% (34.1% to 42.4%)                                      |
| China                                         | 2139839 (1983005 to 2312296) | 5096258 (4750056 to 5499035) | 197 (183 to 213)                                   | 273 (255 to 294) | 38.7% (34.7% to 43.2%)                                      |
| Democratic People's Republic of Korea         | 14339 (13493 to 15314)       | 21809 (20610 to 23210)       | 72 (68 to 77)                                      | 70 (66 to 74)    | -3.5% (-7.1% to 0.8%)                                       |
| Taiwan (Province of China)                    | 20637 (19362 to 21924)       | 29927 (28119 to 32019)       | 106 (100 to 113)                                   | 91 (86 to 97)    | -14.3% (-18.4% to -10.0%)                                   |
| <b>Southeast Asia</b>                         | 690953 (602962 to 898824)    | 1249313 (1128418 to 1450442) | 176 (158 to 220)                                   | 179 (162 to 206) | 1.3% (-10.7% to 9.4%)                                       |
| Cambodia                                      | 29805 (8827 to 99033)        | 27229 (17353 to 57818)       | 311 (107 to 991)                                   | 179 (114 to 386) | -42.4% (-62.6% to 8.8%)                                     |
| Indonesia                                     | 371199 (342075 to 415584)    | 624426 (577523 to 681498)    | 244 (226 to 269)                                   | 236 (218 to 257) | -3.4% (-9.0% to 1.7%)                                       |
| Lao People's Democratic Republic              | 2735 (2537 to 2982)          | 6076 (5689 to 6527)          | 85 (79 to 91)                                      | 95 (89 to 101)   | 11.3% (8.3% to 14.3%)                                       |

| Location         | Prevalence              |                           |                                                    |                  |                                                             |
|------------------|-------------------------|---------------------------|----------------------------------------------------|------------------|-------------------------------------------------------------|
|                  | Numbers<br>(95% UI)     |                           | Age-standardized estimates per 100,000<br>(95% UI) |                  | Percentage change of age-standardized<br>estimates (95% UI) |
|                  | (Year 1990)             | (Year 2019)               | (Year 1990)                                        | (Year 2019)      | (Year 1990–Year 2019)                                       |
| Malaysia         | 15417 (14482 to 16507)  | 38532 (36236 to 41114)    | 107 (101 to 114)                                   | 122 (114 to 130) | 13.1% (10.3% to 15.8%)                                      |
| Maldives         | 124 (117 to 131)        | 566 (518 to 639)          | 81 (77 to 86)                                      | 113 (104 to 126) | 39.2% (30.0% to 55.1%)                                      |
| Mauritius        | 1930 (1813 to 2073)     | 3734 (3493 to 4032)       | 188 (177 to 201)                                   | 240 (224 to 258) | 27.7% (22.6% to 33.7%)                                      |
| Myanmar          | 45843 (31351 to 98916)  | 95561 (72067 to 134781)   | 124 (90 to 251)                                    | 174 (132 to 244) | 40.0% (-11.8% to 104.1%)                                    |
| Philippines      | 70220 (53653 to 111258) | 127472 (109169 to 165496) | 137 (110 to 204)                                   | 125 (107 to 162) | -8.8% (-24% to 1.4%)                                        |
| Seychelles       | 126 (118 to 135)        | 267 (250 to 287)          | 197 (184 to 210)                                   | 230 (215 to 246) | 16.5% (12.4% to 20.4%)                                      |
| Sri Lanka        | 28614 (20202 to 48485)  | 72326 (44291 to 142831)   | 176 (130 to 285)                                   | 304 (184 to 605) | 72.2% (36.7% to 119%)                                       |
| Thailand         | 67897 (63611 to 72766)  | 112221 (105208 to 121967) | 131 (123 to 140)                                   | 125 (117 to 137) | -4.6% (-8.2% to 0.0%)                                       |
| Timor-Leste      | 2771 (998 to 7454)      | 3636 (1543 to 9215)       | 372 (146 to 974)                                   | 355 (150 to 902) | -4.7% (-10.6% to 3.9%)                                      |
| Viet Nam         | 53354 (50294 to 56627)  | 135628 (127816 to 144368) | 100 (95 to 106)                                    | 129 (122 to 138) | 29.0% (25.6% to 32.8%)                                      |
| <b>Oceania</b>   | 4111 (3871 to 4403)     | 11481 (10493 to 12939)    | 82 (78 to 88)                                      | 104 (95 to 117)  | 26.0% (19.6% to 36.0%)                                      |
| American Samoa   | 72 (67 to 77)           | 119 (108 to 134)          | 193 (181 to 207)                                   | 224 (204 to 252) | 16.1% (8.1% to 29.6%)                                       |
| Cook Islands     | 37 (34 to 40)           | 52 (48 to 57)             | 227 (210 to 246)                                   | 252 (232 to 276) | 11.4% (6.8% to 16.4%)                                       |
| Fiji             | 484 (448 to 524)        | 773 (714 to 844)          | 75 (70 to 80)                                      | 85 (78 to 93)    | 13.4% (9.8% to 17.5%)                                       |
| Guam             | 256 (238 to 277)        | 403 (375 to 441)          | 214 (200 to 231)                                   | 224 (209 to 245) | 4.9% (0.6% to 9.1%)                                         |
| Kiribati         | 32 (30 to 35)           | 65 (59 to 72)             | 52 (48 to 56)                                      | 60 (56 to 66)    | 16.4% (10.6% to 25.9%)                                      |
| Marshall Islands | 24 (22 to 25)           | 43 (40 to 46)             | 76 (72 to 82)                                      | 82 (76 to 88)    | 7.1% (4.6% to 9.6%)                                         |

| Location                            | Prevalence                 |                             |                                                    |                   |                                                             |
|-------------------------------------|----------------------------|-----------------------------|----------------------------------------------------|-------------------|-------------------------------------------------------------|
|                                     | Numbers<br>(95% UI)        |                             | Age-standardized estimates per 100,000<br>(95% UI) |                   | Percentage change of age-standardized<br>estimates (95% UI) |
|                                     | (Year 1990)                | (Year 2019)                 | (Year 1990)                                        | (Year 2019)       | (Year 1990–Year 2019)                                       |
| Micronesia (Federated States of)    | 57 (53 to 62)              | 86 (78 to 95)               | 75 (70 to 81)                                      | 90 (82 to 99)     | 19.5% (14.1% to 28.3%)                                      |
| Nauru                               | 13 (12 to 14)              | 16 (15 to 18)               | 162 (152 to 173)                                   | 185 (172 to 201)  | 14.8% (10.7% to 19.3%)                                      |
| Niue                                | 4 (3 to 4)                 | 4 (4 to 4)                  | 173 (161 to 185)                                   | 216 (200 to 237)  | 24.8% (19.3% to 32.7%)                                      |
| Northern Mariana Islands            | 95 (88 to 104)             | 128 (119 to 140)            | 239 (223 to 258)                                   | 251 (232 to 273)  | 5.1% (0.7% to 9.5%)                                         |
| Palau                               | 32 (30 to 34)              | 60 (55 to 65)               | 233 (217 to 252)                                   | 272 (252 to 298)  | 17.1% (13.5% to 20.7%)                                      |
| Papua New Guinea                    | 2311 (2175 to 2472)        | 8120 (7373 to 9247)         | 74 (70 to 79)                                      | 101 (92 to 114)   | 35.9% (27.3% to 49.4%)                                      |
| Samoa                               | 104 (97 to 112)            | 239 (201 to 303)            | 84 (79 to 90)                                      | 128 (109 to 162)  | 52.3% (31.5% to 89.9%)                                      |
| Solomon Islands                     | 202 (181 to 234)           | 501 (460 to 558)            | 83 (75 to 94)                                      | 95 (87 to 105)    | 14.4% (8.0% to 19.4%)                                       |
| Tokelau                             | 2 (2 to 2)                 | 2 (2 to 3)                  | 150 (140 to 160)                                   | 187 (174 to 202)  | 24.7% (20.5% to 29.7%)                                      |
| Tonga                               | 58 (54 to 62)              | 75 (70 to 81)               | 78 (73 to 84)                                      | 83 (78 to 90)     | 6.6% (2.3% to 11.6%)                                        |
| Tuvalu                              | 12 (11 to 12)              | 20 (18 to 21)               | 140 (132 to 149)                                   | 173 (161 to 187)  | 23.8% (19.7% to 29.0%)                                      |
| Vanuatu                             | 91 (80 to 110)             | 232 (201 to 282)            | 78 (69 to 93)                                      | 94 (81 to 113)    | 19.5% (12.7% to 28.5%)                                      |
| <b>North Africa and Middle East</b> | 761978 (412124 to 1681726) | 1597740 (989333 to 3176105) | 252 (145 to 518)                                   | 264 (166 to 520)  | 5.0% (-19.4% to 21.4%)                                      |
| <b>North Africa and Middle East</b> | 761978 (412124 to 1681726) | 1597740 (989333 to 3176105) | 252 (145 to 518)                                   | 264 (166 to 520)  | 5.0% (-19.4% to 21.4%)                                      |
| Afghanistan                         | 170410 (21376 to 675039)   | 229275 (64978 to 655574)    | 1558 (216 to 6103)                                 | 810 (225 to 2351) | -48.0% (-65.9% to 41.6%)                                    |
| Algeria                             | 25519 (23487 to 27768)     | 67773 (56104 to 95193)      | 133 (124 to 145)                                   | 160 (134 to 221)  | 20.1% (2.5% to 61.7%)                                       |
| Bahrain                             | 549 (503 to 619)           | 2464 (2288 to 2677)         | 118 (109 to 133)                                   | 137 (128 to 149)  | 16.2% (8.9% to 22.2%)                                       |
| Egypt                               | 40374 (38033 to 43009)     | 91724 (85282 to 100309)     | 88 (83 to 93)                                      | 100 (93 to 108)   | 13.8% (8.4% to 21.8%)                                       |

| Location                   | Prevalence               |                           |                                                    |                    |                                                             |
|----------------------------|--------------------------|---------------------------|----------------------------------------------------|--------------------|-------------------------------------------------------------|
|                            | Numbers<br>(95% UI)      |                           | Age-standardized estimates per 100,000<br>(95% UI) |                    | Percentage change of age-standardized<br>estimates (95% UI) |
|                            | (Year 1990)              | (Year 2019)               | (Year 1990)                                        | (Year 2019)        | (Year 1990–Year 2019)                                       |
| Iran (Islamic Republic of) | 153375 (88594 to 316280) | 192392 (147592 to 289632) | 333 (200 to 673)                                   | 209 (163 to 308)   | -37.1% (-55.4% to -15%)                                     |
| Iraq                       | 141309 (44811 to 400279) | 275649 (100535 to 735044) | 905 (308 to 2513)                                  | 694 (261 to 1839)  | -23.3% (-32.7% to -11.6%)                                   |
| Jordan                     | 2840 (2672 to 3012)      | 12356 (11428 to 13714)    | 106 (100 to 112)                                   | 118 (110 to 129)   | 10.9% (5.8% to 19.5%)                                       |
| Kuwait                     | 2499 (2200 to 3098)      | 8925 (7309 to 12662)      | 159 (143 to 190)                                   | 179 (150 to 246)   | 12.6% (3.7% to 28.4%)                                       |
| Lebanon                    | 24895 (6752 to 81123)    | 21407 (8783 to 61368)     | 804 (228 to 2582)                                  | 400 (164 to 1148)  | -50.2% (-57.6% to -27.9%)                                   |
| Libya                      | 5625 (4142 to 9380)      | 20977 (12852 to 41589)    | 168 (134 to 249)                                   | 287 (177 to 573)   | 71.0% (31.2% to 126.2%)                                     |
| Morocco                    | 27077 (24049 to 33304)   | 49136 (45658 to 53596)    | 128 (116 to 152)                                   | 133 (124 to 145)   | 4.1% (-6.6% to 10.5%)                                       |
| Oman                       | 2197 (2040 to 2360)      | 7431 (6863 to 8020)       | 147 (137 to 157)                                   | 160 (150 to 171)   | 9.3% (5.5% to 13.7%)                                        |
| Palestine                  | 13014 (4565 to 34264)    | 34617 (12023 to 92970)    | 701 (271 to 1799)                                  | 814 (289 to 2164)  | 16.1% (1.3% to 24.0%)                                       |
| Qatar                      | 757 (704 to 818)         | 5438 (5015 to 5874)       | 172 (162 to 185)                                   | 172 (160 to 184)   | -0.5% (-4.4% to 3.4%)                                       |
| Saudi Arabia               | 23679 (22193 to 25441)   | 99232 (90735 to 108803)   | 202 (189 to 216)                                   | 256 (237 to 279)   | 27.2% (21.8% to 32.6%)                                      |
| Sudan                      | 32065 (26718 to 44313)   | 88763 (69261 to 135844)   | 208 (179 to 272)                                   | 274 (218 to 405)   | 31.5% (19.6% to 50.5%)                                      |
| Syrian Arab Republic       | 16275 (9261 to 39605)    | 146780 (46392 to 407902)  | 157 (99 to 352)                                    | 1049 (333 to 2942) | 567.8% (215.4% to 1184.7%)                                  |

| Location                  | Prevalence                   |                              |                                                    |                  |                                                             |
|---------------------------|------------------------------|------------------------------|----------------------------------------------------|------------------|-------------------------------------------------------------|
|                           | Numbers<br>(95% UI)          |                              | Age-standardized estimates per 100,000<br>(95% UI) |                  | Percentage change of age-standardized<br>estimates (95% UI) |
|                           | (Year 1990)                  | (Year 2019)                  | (Year 1990)                                        | (Year 2019)      | (Year 1990–Year 2019)                                       |
| Tunisia                   | 8279 (7740 to 9006)          | 16698 (15691 to 17935)       | 120 (112 to 130)                                   | 130 (122 to 140) | 8.6% (3.7% to 13.4%)                                        |
| Turkey                    | 52416 (49089 to 56145)       | 139191 (121472 to 172113)    | 102 (96 to 109)                                    | 151 (132 to 188) | 47.9% (32.9% to 75.7%)                                      |
| United Arab Emirates      | 2490 (2314 to 2700)          | 17277 (16071 to 18581)       | 140 (132 to 151)                                   | 139 (131 to 148) | -1.2% (-5.1% to 1.8%)                                       |
| Yemen                     | 15821 (10321 to 29852)       | 68611 (34516 to 160572)      | 149 (108 to 252)                                   | 260 (137 to 595) | 74.1% (25.0% to 134.1%)                                     |
| <b>South Asia</b>         | 1313358 (1235439 to 1395741) | 3161582 (2952968 to 3412943) | 153 (145 to 162)                                   | 188 (176 to 202) | 22.9% (19.5% to 27.1%)                                      |
| <b>South Asia</b>         | 1313358 (1235439 to 1395741) | 3161582 (2952968 to 3412943) | 153 (145 to 162)                                   | 188 (176 to 202) | 22.9% (19.5% to 27.1%)                                      |
| Bangladesh                | 84744 (77080 to 94106)       | 229245 (204809 to 265803)    | 105 (97 to 115)                                    | 148 (132 to 171) | 41.0% (33.7% to 50.7%)                                      |
| Bhutan                    | 509 (475 to 545)             | 1192 (1113 to 1276)          | 115 (108 to 123)                                   | 166 (156 to 177) | 43.6% (37.9% to 50.9%)                                      |
| India                     | 1134037 (1065345 to 1209041) | 2620689 (2458704 to 2800787) | 166 (157 to 177)                                   | 197 (185 to 211) | 18.6% (15.6% to 21.5%)                                      |
| Nepal                     | 17788 (16718 to 19069)       | 50961 (44198 to 63223)       | 121 (115 to 129)                                   | 183 (160 to 222) | 50.6% (35.5% to 80.4%)                                      |
| Pakistan                  | 76281 (71641 to 80906)       | 259494 (229416 to 318122)    | 95 (89 to 101)                                     | 144 (129 to 172) | 51.5% (37.9% to 77.7%)                                      |
| <b>Sub-Saharan Africa</b> | 711974 (573802 to 1072304)   | 1683535 (1394868 to 2363973) | 193 (164 to 265)                                   | 211 (177 to 288) | 9.1% (4.8% to 13.0%)                                        |

| Location                           | Prevalence                |                           |                                                    |                  |                                                             |
|------------------------------------|---------------------------|---------------------------|----------------------------------------------------|------------------|-------------------------------------------------------------|
|                                    | Numbers<br>(95% UI)       |                           | Age-standardized estimates per 100,000<br>(95% UI) |                  | Percentage change of age-standardized<br>estimates (95% UI) |
|                                    | (Year 1990)               | (Year 2019)               | (Year 1990)                                        | (Year 2019)      | (Year 1990–Year 2019)                                       |
| <b>Southern Sub-Saharan Africa</b> | 88483 (81203 to 100702)   | 125520 (117191 to 135338) | 214 (198 to 239)                                   | 171 (160 to 184) | -20.3% (-25.3% to -17.5%)                                   |
| Botswana                           | 1540 (1432 to 1663)       | 3919 (3628 to 4221)       | 157 (147 to 169)                                   | 178 (166 to 191) | 13.3% (10.5% to 16.5%)                                      |
| Eswatini                           | 853 (795 to 913)          | 1458 (1350 to 1563)       | 154 (145 to 165)                                   | 150 (140 to 160) | -3.1% (-5.3% to -0.7%)                                      |
| Lesotho                            | 2067 (1925 to 2219)       | 2692 (2508 to 2885)       | 146 (136 to 156)                                   | 139 (130 to 149) | -4.7% (-7.5% to -1.2%)                                      |
| Namibia                            | 3028 (2000 to 5729)       | 4126 (3720 to 4849)       | 260 (184 to 449)                                   | 201 (182 to 237) | -22.6% (-48.4% to 1.6%)                                     |
| South Africa                       | 70255 (64677 to 80330)    | 96685 (90104 to 104482)   | 232 (214 to 261)                                   | 176 (165 to 190) | -24.1% (-29.5% to -21.1%)                                   |
| Zimbabwe                           | 10739 (9999 to 11655)     | 16640 (15505 to 17907)    | 151 (142 to 163)                                   | 140 (132 to 151) | -7.3% (-9.5% to -5.0%)                                      |
| <b>Western Sub-Saharan Africa</b>  | 246022 (228652 to 265737) | 686804 (626081 to 784464) | 183 (171 to 197)                                   | 215 (198 to 241) | 17.7% (14.0% to 26.0%)                                      |
| Benin                              | 5790 (5410 to 6173)       | 17311 (16106 to 18602)    | 187 (175 to 199)                                   | 207 (193 to 222) | 11.1% (8.9% to 13.4%)                                       |
| Burkina Faso                       | 10229 (9563 to 10973)     | 32023 (29801 to 34408)    | 161 (151 to 173)                                   | 212 (198 to 228) | 32.0% (29.5% to 34.7%)                                      |
| Cabo Verde                         | 482 (452 to 515)          | 1197 (1120 to 1284)       | 187 (176 to 200)                                   | 229 (215 to 245) | 22.3% (19.4% to 25.5%)                                      |
| Cameroon                           | 15328 (14138 to 16623)    | 48942 (44632 to 54262)    | 219 (202 to 236)                                   | 234 (214 to 256) | 6.8% (2.4% to 12.4%)                                        |
| Chad                               | 10278 (7050 to 18421)     | 22401 (19089 to 30056)    | 231 (170 to 381)                                   | 225 (193 to 296) | -2.6% (-23.6% to 14.9%)                                     |
| Côte d'Ivoire                      | 14611 (13535 to 15712)    | 39548 (36200 to 43009)    | 183 (171 to 196)                                   | 206 (191 to 222) | 12.7% (9.8% to 17.8%)                                       |
| Gambia                             | 1241 (1073 to 1596)       | 3008 (2775 to 3265)       | 187 (166 to 230)                                   | 189 (175 to 206) | 1.4% (-12.1% to 8.9%)                                       |

| Location                          | Prevalence                |                            |                                                    |                   |                                                             |
|-----------------------------------|---------------------------|----------------------------|----------------------------------------------------|-------------------|-------------------------------------------------------------|
|                                   | Numbers<br>(95% UI)       |                            | Age-standardized estimates per 100,000<br>(95% UI) |                   | Percentage change of age-standardized<br>estimates (95% UI) |
|                                   | (Year 1990)               | (Year 2019)                | (Year 1990)                                        | (Year 2019)       | (Year 1990–Year 2019)                                       |
| Ghana                             | 21026 (19340 to 22809)    | 62838 (57513 to 68360)     | 201 (186 to 217)                                   | 248 (228 to 270)  | 23.3% (20.7% to 25.8%)                                      |
| Guinea                            | 7872 (7352 to 8437)       | 17737 (16424 to 19192)     | 177 (166 to 190)                                   | 205 (190 to 221)  | 15.8% (12.5% to 20.8%)                                      |
| Guinea-Bissau                     | 1353 (1241 to 1470)       | 3078 (2793 to 3426)        | 194 (178 to 210)                                   | 222 (202 to 246)  | 14.5% (9.4% to 24.1%)                                       |
| Liberia                           | 2948 (2450 to 4176)       | 10240 (6993 to 18359)      | 195 (167 to 258)                                   | 276 (195 to 483)  | 41.5% (14.8% to 87.6%)                                      |
| Mali                              | 10345 (9609 to 11118)     | 33763 (27877 to 47737)     | 172 (161 to 185)                                   | 235 (198 to 321)  | 36.6% (18.2% to 81.7%)                                      |
| Mauritania                        | 3502 (3209 to 3805)       | 7623 (7004 to 8283)        | 241 (221 to 262)                                   | 257 (236 to 279)  | 6.5% (4.7% to 8.1%)                                         |
| Niger                             | 8807 (8185 to 9456)       | 26780 (24637 to 29399)     | 174 (163 to 186)                                   | 196 (182 to 212)  | 12.7% (9.9% to 16.3%)                                       |
| Nigeria                           | 113598 (105957 to 122265) | 307508 (280722 to 351514)  | 175 (165 to 189)                                   | 205 (189 to 228)  | 16.8% (12% to 27.8%)                                        |
| Sao Tome and Principe             | 178 (165 to 192)          | 415 (386 to 446)           | 209 (196 to 224)                                   | 257 (241 to 276)  | 22.9% (19.3% to 26.1%)                                      |
| Senegal                           | 8905 (8247 to 9569)       | 22726 (20984 to 24629)     | 177 (164 to 190)                                   | 205 (190 to 223)  | 16.3% (13.4% to 20.4%)                                      |
| Sierra Leone                      | 4598 (4290 to 4915)       | 16180 (12691 to 24462)     | 171 (160 to 183)                                   | 265 (211 to 392)  | 54.6% (24.7% to 126.6%)                                     |
| Togo                              | 4922 (4539 to 5336)       | 13475 (12407 to 14597)     | 208 (193 to 224)                                   | 220 (204 to 238)  | 6.1% (3.8% to 8.9%)                                         |
| <b>Eastern Sub-Saharan Africa</b> | 322647 (219213 to 603862) | 712913 (537596 to 1156257) | 216 (159 to 366)                                   | 234 (179 to 377)  | 8.3% (-3.2% to 15.3%)                                       |
| Burundi                           | 3190 (2954 to 3414)       | 67502 (22199 to 188953)    | 78 (73 to 83)                                      | 703 (242 to 1936) | 799.8% (206.9% to 2316.4%)                                  |

| Location                    | Prevalence              |                          |                                                    |                   |                                                             |
|-----------------------------|-------------------------|--------------------------|----------------------------------------------------|-------------------|-------------------------------------------------------------|
|                             | Numbers<br>(95% UI)     |                          | Age-standardized estimates per 100,000<br>(95% UI) |                   | Percentage change of age-standardized<br>estimates (95% UI) |
|                             | (Year 1990)             | (Year 2019)              | (Year 1990)                                        | (Year 2019)       | (Year 1990–Year 2019)                                       |
| Comoros                     | 838 (775 to 905)        | 1849 (1703 to 2001)      | 252 (234 to 271)                                   | 291 (269 to 315)  | 15.7% (12.9% to 18.5%)                                      |
| Djibouti                    | 754 (692 to 822)        | 2603 (2361 to 2969)      | 230 (214 to 249)                                   | 254 (233 to 287)  | 10.3% (5.6% to 20%)                                         |
| Eritrea                     | 27056 (7937 to 76851)   | 23173 (13141 to 51188)   | 967 (318 to 2678)                                  | 449 (255 to 978)  | -53.5% (-64.8% to -19.5%)                                   |
| Ethiopia                    | 75914 (41139 to 165521) | 140703 (87440 to 285059) | 171 (105 to 344)                                   | 182 (114 to 366)  | 6.0% (-7.0% to 29.3%)                                       |
| Kenya                       | 13839 (12959 to 14779)  | 40838 (36708 to 49228)   | 89 (84 to 94)                                      | 100 (92 to 116)   | 13.0% (5.7% to 30.0%)                                       |
| Madagascar                  | 18232 (16806 to 19829)  | 44949 (41190 to 49020)   | 214 (198 to 232)                                   | 221 (204 to 240)  | 3.3% (0.4% to 6.1%)                                         |
| Malawi                      | 11285 (10462 to 12176)  | 25880 (23743 to 28080)   | 164 (154 to 177)                                   | 193 (179 to 208)  | 17.1% (13.5% to 20.6%)                                      |
| Mozambique                  | 49506 (25560 to 115606) | 54653 (47593 to 69114)   | 456 (259 to 995)                                   | 275 (237 to 357)  | -39.7% (-64.2% to -6.4%)                                    |
| Rwanda                      | 12008 (10930 to 13304)  | 62514 (31791 to 142164)  | 235 (215 to 256)                                   | 605 (316 to 1347) | 157.9% (37.2% to 467.9%)                                    |
| Somalia                     | 11992 (8174 to 33180)   | 38706 (28493 to 65501)   | 218 (161 to 518)                                   | 259 (199 to 421)  | 19.0% (-34.3% to 71.2%)                                     |
| South Sudan                 | 12203 (9589 to 18634)   | 23709 (16946 to 41158)   | 279 (231 to 394)                                   | 344 (255 to 567)  | 23.3% (8.9% to 45.7%)                                       |
| Uganda                      | 42654 (22535 to 100043) | 69689 (60102 to 90469)   | 305 (177 to 675)                                   | 254 (219 to 333)  | -16.5% (-49.7% to 25.6%)                                    |
| United Republic of Tanzania | 34334 (31696 to 36935)  | 90556 (83657 to 98054)   | 189 (176 to 203)                                   | 220 (206 to 237)  | 16.7% (14.1% to 19.2%)                                      |



| Location                          | Prevalence              |                          |                                                    |                  |                                                             |
|-----------------------------------|-------------------------|--------------------------|----------------------------------------------------|------------------|-------------------------------------------------------------|
|                                   | Numbers<br>(95% UI)     |                          | Age-standardized estimates per 100,000<br>(95% UI) |                  | Percentage change of age-standardized<br>estimates (95% UI) |
|                                   | (Year 1990)             | (Year 2019)              | (Year 1990)                                        | (Year 2019)      | (Year 1990–Year 2019)                                       |
| Zambia                            | 8607 (7922 to 9298)     | 25020 (22961 to 27064)   | 158 (148 to 170)                                   | 188 (175 to 203) | 18.7% (14.9% to 22.6%)                                      |
| <b>Central Sub-Saharan Africa</b> | 54823 (33715 to 110269) | 158299 (92933 to 330433) | 118 (79 to 217)                                    | 154 (93 to 313)  | 30.4% (16.9% to 44.5%)                                      |
| Angola                            | 32214 (11520 to 87247)  | 45818 (23083 to 106888)  | 330 (131 to 869)                                   | 217 (109 to 508) | -34.2% (-42.1% to -15.1%)                                   |
| Central African Republic          | 1161 (1082 to 1243)     | 9062 (4135 to 21755)     | 55 (52 to 58)                                      | 178 (89 to 409)  | 224.5% (63.6% to 624%)                                      |
| Congo                             | 1171 (1094 to 1254)     | 8752 (4373 to 19792)     | 63 (60 to 68)                                      | 184 (96 to 407)  | 191.1% (55.0% to 531%)                                      |
| Democratic Republic of the Congo  | 19452 (18069 to 20914)  | 92511 (58980 to 179752)  | 69 (65 to 74)                                      | 132 (88 to 245)  | 90.4% (29.4% to 249.7%)                                     |
| Equatorial Guinea                 | 195 (182 to 209)        | 830 (772 to 898)         | 61 (58 to 65)                                      | 77 (73 to 82)    | 26.2% (22.1% to 30.4%)                                      |
| Gabon                             | 631 (593 to 673)        | 1326 (1248 to 1413)      | 81 (77 to 86)                                      | 86 (82 to 92)    | 6.5% (4.2% to 8.9%)                                         |

Abbreviations: UI, uncertainty interval
