# Supplementary material for: Global, regional and national burden of traumatic brain injury and spinal cord injury, 1990–2019: a systematic analysis for the Global Burden of Disease Study 2019
Source: PubMed Central journal article supplement — BMJ Open. 2023 Oct 6;13(10):e075049. doi: 10.1136/bmjopen-2023-075049 (PMC10565269; doi:10.1136/bmjopen-2023-075049), 2023-10-06
Supplement: bmjopen-2023-075049supp020.pdf [file bmjopen-2023-075049supp020.pdf]

eTable 13. Years lived with disability for 1990 and 2019 and percentage changes of age-standardized rates by location for spinal cord injury, 1990–2019

| Location                         | YLD                          |                              |                                                |                 |                                                         |
|----------------------------------|------------------------------|------------------------------|------------------------------------------------|-----------------|---------------------------------------------------------|
|                                  | Numbers<br>(95% UI)          |                              | Age-standardized rates per 100,000<br>(95% UI) |                 | Percentage change of age-standardized rates<br>(95% UI) |
|                                  | (Year 1990)                  | (Year 2019)                  | (Year 1990)                                    | (Year 2019)     | (Year 1990–Year 2019)                                   |
| <b>Global</b>                    | 3748672 (2702778 to 4951850) | 6200809 (4465317 to 8156193) | 77 (56 to 101)                                 | 76 (55 to 100)  | -1.5% (-5.6% to 3.3%)                                   |
| <b>High-income</b>               | 885050 (632972 to 1135187)   | 1210171 (857173 to 1553079)  | 86 (62 to 111)                                 | 84 (59 to 108)  | -2.8% (-4.7% to -1.1%)                                  |
| <b>High-income North America</b> | 383372 (273104 to 493551)    | 543327 (382768 to 696793)    | 123 (87 to 159)                                | 113 (80 to 146) | -7.7% (-10.4% to -4.8%)                                 |
| Canada                           | 16435 (11771 to 21451)       | 27394 (19406 to 35536)       | 54 (39 to 70)                                  | 54 (38 to 70)   | 0.8% (-7.1% to 9.1%)                                    |
| Greenland                        | 89 (65 to 114)               | 91 (64 to 116)               | 169 (121 to 213)                               | 139 (98 to 176) | -17.6% (-22% to -12.8%)                                 |
| United States of America         | 366838 (261078 to 473846)    | 515833 (364639 to 661820)    | 130 (93 to 169)                                | 120 (85 to 155) | -7.8% (-10.6% to -4.8%)                                 |
| <b>Australasia</b>               | 19732 (13765 to 25937)       | 33799 (23765 to 44013)       | 91 (63 to 120)                                 | 97 (68 to 127)  | 6.7% (0.8% to 13%)                                      |
| Australia                        | 16039 (11183 to 21253)       | 27954 (19462 to 36495)       | 88 (61 to 117)                                 | 95 (66 to 124)  | 7% (-0.2% to 14.6%)                                     |
| New Zealand                      | 3693 (2583 to 4832)          | 5845 (4127 to 7620)          | 102 (71 to 134)                                | 109 (77 to 143) | 6.5% (0% to 13.5%)                                      |
| <b>High-income Asia Pacific</b>  | 171547 (120968 to 220202)    | 226816 (161070 to 292262)    | 87 (62 to 112)                                 | 83 (58 to 107)  | -5.3% (-7.9% to -2.6%)                                  |
| Brunei Darussalam                | 127 (90 to 165)              | 234 (164 to 302)             | 58 (42 to 74)                                  | 50 (35 to 65)   | -12.6% (-19.7% to -5.1%)                                |
| Japan                            | 141594 (100178 to 182978)    | 177770 (125301 to 229752)    | 94 (66 to 122)                                 | 93 (66 to 121)  | -0.8% (-3.5% to 1.9%)                                   |
| Republic of Korea                | 28128 (19849 to 36057)       | 44931 (31441 to 58697)       | 65 (46 to 83)                                  | 62 (43 to 81)   | -4.5% (-12.2% to 4.1%)                                  |

| Location              | YLD                       |                           |                                                |                 |                                                         |
|-----------------------|---------------------------|---------------------------|------------------------------------------------|-----------------|---------------------------------------------------------|
|                       | Numbers<br>(95% UI)       |                           | Age-standardized rates per 100,000<br>(95% UI) |                 | Percentage change of age-standardized rates<br>(95% UI) |
|                       | (Year 1990)               | (Year 2019)               | (Year 1990)                                    | (Year 2019)     | (Year 1990–Year 2019)                                   |
| Singapore             | 1697 (1193 to 2200)       | 3881 (2727 to 5081)       | 53 (37 to 69)                                  | 53 (37 to 70)   | 0.4% (-8.2% to 9.1%)                                    |
| <b>Western Europe</b> | 279889 (197802 to 361524) | 362292 (259168 to 466837) | 62 (44 to 81)                                  | 63 (45 to 82)   | 1.4% (-2.3% to 5.2%)                                    |
| Andorra               | 38 (27 to 50)             | 76 (54 to 99)             | 63 (45 to 83)                                  | 67 (48 to 88)   | 6.5% (-2.1% to 15.3%)                                   |
| Austria               | 5901 (4157 to 7675)       | 7418 (5264 to 9570)       | 64 (45 to 85)                                  | 63 (44 to 81)   | -2.6% (-10.4% to 6.2%)                                  |
| Belgium               | 7661 (5439 to 9989)       | 10894 (7676 to 14182)     | 65 (46 to 85)                                  | 72 (51 to 95)   | 10.9% (1.9% to 20.4%)                                   |
| Cyprus                | 461 (331 to 602)          | 943 (661 to 1242)         | 57 (41 to 74)                                  | 59 (41 to 78)   | 3.9% (-4.9% to 13.6%)                                   |
| Denmark               | 3584 (2531 to 4695)       | 4168 (2926 to 5448)       | 58 (41 to 75)                                  | 58 (40 to 75)   | 0% (-9.2% to 10.4%)                                     |
| Finland               | 4795 (3379 to 6195)       | 6140 (4337 to 8023)       | 82 (57 to 106)                                 | 85 (59 to 112)  | 3.1% (-5% to 12.3%)                                     |
| France                | 44198 (31606 to 57539)    | 58574 (41243 to 76394)    | 66 (47 to 86)                                  | 67 (47 to 88)   | 0.9% (-7% to 9.7%)                                      |
| Germany               | 53226 (38070 to 70139)    | 65939 (46825 to 86203)    | 55 (39 to 73)                                  | 58 (40 to 76)   | 4.3% (-4.6% to 13.4%)                                   |
| Greece                | 7006 (4919 to 9093)       | 7380 (5230 to 9569)       | 58 (41 to 76)                                  | 55 (39 to 73)   | -5% (-13.1% to 3.3%)                                    |
| Iceland               | 152 (107 to 200)          | 247 (175 to 324)          | 58 (41 to 76)                                  | 60 (42 to 80)   | 4% (-4.8% to 13.7%)                                     |
| Ireland               | 1985 (1414 to 2614)       | 3395 (2405 to 4422)       | 54 (39 to 72)                                  | 59 (42 to 77)   | 8.3% (-0.6% to 17.8%)                                   |
| Israel                | 2599 (1868 to 3382)       | 6892 (4598 to 10405)      | 55 (39 to 71)                                  | 73 (48 to 111)  | 33.1% (8.1% to 83.4%)                                   |
| Italy                 | 40412 (28984 to 52258)    | 44023 (31605 to 56655)    | 59 (42 to 76)                                  | 52 (37 to 68)   | -10.7% (-13.9% to -6.8%)                                |
| Luxembourg            | 295 (209 to 385)          | 495 (353 to 644)          | 65 (46 to 85)                                  | 64 (45 to 83)   | -2.4% (-10.8% to 5.8%)                                  |
| Malta                 | 232 (164 to 306)          | 370 (261 to 483)          | 58 (41 to 76)                                  | 65 (46 to 86)   | 12.7% (3.7% to 23.3%)                                   |
| Monaco                | 47 (33 to 62)             | 67 (47 to 88)             | 116 (81 to 153)                                | 132 (91 to 177) | 13.9% (6.8% to 21.4%)                                   |

| Location                                                | YLD                       |                           |                                                |                 |                                                         |
|---------------------------------------------------------|---------------------------|---------------------------|------------------------------------------------|-----------------|---------------------------------------------------------|
|                                                         | Numbers<br>(95% UI)       |                           | Age-standardized rates per 100,000<br>(95% UI) |                 | Percentage change of age-standardized rates<br>(95% UI) |
|                                                         | (Year 1990)               | (Year 2019)               | (Year 1990)                                    | (Year 2019)     | (Year 1990–Year 2019)                                   |
| Netherlands                                             | 8074 (5744 to 10507)      | 11974 (8526 to 15625)     | 47 (33 to 61)                                  | 52 (37 to 68)   | 10.1% (0.5% to 19.8%)                                   |
| Norway                                                  | 6642 (4671 to 8561)       | 9426 (6643 to 12304)      | 129 (91 to 169)                                | 134 (94 to 177) | 3.8% (0.3% to 7.8%)                                     |
| Portugal                                                | 6969 (4907 to 9277)       | 6283 (4459 to 8202)       | 62 (44 to 84)                                  | 43 (30 to 56)   | -31.5% (-39.4% to -24.1%)                               |
| San Marino                                              | 33 (23 to 44)             | 58 (40 to 76)             | 123 (87 to 163)                                | 137 (95 to 181) | 10.7% (3.9% to 18%)                                     |
| Spain                                                   | 23321 (16596 to 30399)    | 34473 (24458 to 44862)    | 53 (38 to 70)                                  | 57 (40 to 75)   | 6.1% (-4.5% to 17.5%)                                   |
| Sweden                                                  | 14031 (9879 to 18292)     | 18973 (13417 to 24808)    | 131 (92 to 172)                                | 139 (96 to 184) | 5.6% (-0.2% to 11.3%)                                   |
| Switzerland                                             | 6683 (4699 to 8775)       | 8610 (6048 to 11261)      | 80 (57 to 105)                                 | 74 (51 to 97)   | -8.2% (-15.9% to -0.1%)                                 |
| United Kingdom                                          | 41311 (29390 to 53200)    | 55158 (39439 to 71101)    | 63 (45 to 81)                                  | 65 (46 to 85)   | 4% (0.7% to 7.2%)                                       |
| <b>Southern Latin America</b>                           | 30510 (22019 to 39520)    | 43936 (31118 to 56649)    | 63 (46 to 82)                                  | 60 (42 to 78)   | -4.8% (-14.1% to 2.9%)                                  |
| Argentina                                               | 21112 (15060 to 28261)    | 29214 (20449 to 37642)    | 65 (47 to 87)                                  | 60 (42 to 78)   | -7.3% (-19.2% to 3.5%)                                  |
| Chile                                                   | 7238 (5210 to 9296)       | 12222 (8740 to 15961)     | 58 (42 to 74)                                  | 59 (42 to 76)   | 1.4% (-7.4% to 10.5%)                                   |
| Uruguay                                                 | 2159 (1561 to 2790)       | 2499 (1787 to 3231)       | 66 (48 to 85)                                  | 64 (46 to 83)   | -3.2% (-11.3% to 6.3%)                                  |
| <b>Central Europe, Eastern Europe, and Central Asia</b> | 444671 (316403 to 564756) | 407384 (290705 to 526194) | 100 (71 to 127)                                | 82 (58 to 106)  | -18% (-21.9% to -10.7%)                                 |
| <b>Eastern Europe</b>                                   | 271646 (192682 to 347314) | 219534 (156030 to 282875) | 108 (76 to 138)                                | 85 (60 to 109)  | -21.4% (-25.1% to -15.4%)                               |

| Location               | YLD                       |                           |                                                |                 |                                                         |
|------------------------|---------------------------|---------------------------|------------------------------------------------|-----------------|---------------------------------------------------------|
|                        | Numbers<br>(95% UI)       |                           | Age-standardized rates per 100,000<br>(95% UI) |                 | Percentage change of age-standardized rates<br>(95% UI) |
|                        | (Year 1990)               | (Year 2019)               | (Year 1990)                                    | (Year 2019)     | (Year 1990–Year 2019)                                   |
| Belarus                | 10900 (7733 to 13970)     | 9342 (6561 to 12215)      | 95 (67 to 121)                                 | 78 (55 to 102)  | -17.1% (-23.2% to -11.3%)                               |
| Estonia                | 1886 (1327 to 2431)       | 1225 (867 to 1610)        | 107 (76 to 138)                                | 74 (52 to 97)   | -31.1% (-36.6% to -25.5%)                               |
| Latvia                 | 3483 (2489 to 4452)       | 1823 (1280 to 2382)       | 115 (82 to 147)                                | 75 (52 to 98)   | -35.2% (-40.3% to -29.8%)                               |
| Lithuania              | 4346 (3095 to 5557)       | 3002 (2125 to 3902)       | 107 (76 to 137)                                | 82 (57 to 107)  | -23.5% (-29.2% to -17.6%)                               |
| Republic of Moldova    | 4120 (2959 to 5252)       | 3227 (2279 to 4171)       | 90 (65 to 114)                                 | 71 (50 to 92)   | -21.1% (-27.6% to -14.2%)                               |
| Russian Federation     | 184998 (131132 to 235248) | 156702 (111813 to 202955) | 111 (78 to 141)                                | 87 (62 to 112)  | -21.5% (-25.9% to -15%)                                 |
| Ukraine                | 61912 (43941 to 79689)    | 44214 (31275 to 57074)    | 104 (74 to 133)                                | 82 (58 to 106)  | -21% (-27.4% to -13.3%)                                 |
| <b>Central Europe</b>  | 134251 (96558 to 170285)  | 132314 (94264 to 171655)  | 100 (72 to 127)                                | 92 (65 to 119)  | -8.4% (-13% to -2%)                                     |
| Albania                | 2910 (2092 to 3738)       | 3007 (2094 to 3962)       | 99 (71 to 127)                                 | 93 (65 to 123)  | -6.2% (-15.9% to 8.6%)                                  |
| Bosnia and Herzegovina | 4834 (3424 to 6442)       | 6377 (3687 to 12037)      | 101 (72 to 135)                                | 156 (90 to 302) | 54.5% (11.7% to 130.8%)                                 |
| Bulgaria               | 9803 (6941 to 12610)      | 7357 (5223 to 9532)       | 99 (70 to 127)                                 | 86 (61 to 112)  | -12.6% (-19% to -6.2%)                                  |
| Croatia                | 5550 (3949 to 7139)       | 5690 (4019 to 7402)       | 99 (70 to 128)                                 | 102 (73 to 134) | 3.4% (-5.4% to 16.5%)                                   |
| Czechia                | 12202 (8618 to 15787)     | 13522 (9535 to 17554)     | 105 (75 to 136)                                | 99 (70 to 130)  | -5.7% (-11.9% to 1.4%)                                  |
| Hungary                | 11949 (8547 to 15269)     | 10581 (7521 to 13774)     | 99 (70 to 127)                                 | 85 (60 to 112)  | -13.9% (-20.6% to -6.4%)                                |
| Montenegro             | 587 (418 to 757)          | 657 (462 to 856)          | 91 (64 to 117)                                 | 88 (62 to 115)  | -2.5% (-8.6% to 4.4%)                                   |
| North Macedonia        | 1697 (1189 to 2167)       | 2107 (1487 to 2725)       | 81 (57 to 104)                                 | 81 (57 to 105)  | -1.1% (-9.3% to 7.5%)                                   |
| Poland                 | 40801 (29267 to 51706)    | 43601 (30773 to 56420)    | 100 (71 to 126)                                | 89 (63 to 115)  | -11.1% (-15.6% to -6.8%)                                |

| Location                           | YLD                       |                           |                                                |                 |                                                         |
|------------------------------------|---------------------------|---------------------------|------------------------------------------------|-----------------|---------------------------------------------------------|
|                                    | Numbers<br>(95% UI)       |                           | Age-standardized rates per 100,000<br>(95% UI) |                 | Percentage change of age-standardized rates<br>(95% UI) |
|                                    | (Year 1990)               | (Year 2019)               | (Year 1990)                                    | (Year 2019)     | (Year 1990–Year 2019)                                   |
| Romania                            | 26357 (18966 to 33675)    | 19666 (14015 to 25656)    | 104 (75 to 133)                                | 82 (58 to 107)  | -21.2% (-27.4% to -14.7%)                               |
| Serbia                             | 9405 (6815 to 12082)      | 10185 (7050 to 14487)     | 90 (65 to 115)                                 | 98 (67 to 141)  | 9.4% (-8.5% to 47%)                                     |
| Slovakia                           | 5560 (3928 to 7110)       | 6544 (4662 to 8499)       | 99 (70 to 127)                                 | 95 (67 to 123)  | -4.8% (-11.4% to 2%)                                    |
| Slovenia                           | 2596 (1853 to 3396)       | 3019 (2147 to 3976)       | 117 (83 to 153)                                | 109 (77 to 143) | -6.7% (-12.9% to -0.5%)                                 |
| <b>Central Asia</b>                | 38774 (28022 to 49649)    | 55536 (39430 to 73018)    | 64 (46 to 81)                                  | 58 (42 to 76)   | -8.1% (-16.7% to 8%)                                    |
| Armenia                            | 5198 (3146 to 8491)       | 2673 (1793 to 3841)       | 157 (95 to 255)                                | 76 (52 to 108)  | -51.6% (-60% to -40.6%)                                 |
| Azerbaijan                         | 3604 (2571 to 4580)       | 6274 (4363 to 8767)       | 54 (39 to 69)                                  | 54 (38 to 75)   | 0.7% (-14.3% to 25.7%)                                  |
| Georgia                            | 3591 (2566 to 4613)       | 3053 (2133 to 4063)       | 62 (44 to 79)                                  | 73 (50 to 98)   | 18.4% (2.9% to 47.1%)                                   |
| Kazakhstan                         | 10394 (7403 to 13230)     | 11569 (8175 to 14962)     | 66 (47 to 84)                                  | 60 (42 to 78)   | -9.5% (-17.4% to -1.5%)                                 |
| Kyrgyzstan                         | 2318 (1672 to 2968)       | 3234 (2302 to 4195)       | 61 (44 to 77)                                  | 52 (37 to 67)   | -14.5% (-22.7% to -5.2%)                                |
| Mongolia                           | 951 (688 to 1200)         | 2105 (1497 to 2698)       | 55 (40 to 70)                                  | 60 (43 to 77)   | 8.6% (-1.2% to 18.7%)                                   |
| Tajikistan                         | 2367 (1683 to 3005)       | 7748 (4353 to 15772)      | 58 (42 to 73)                                  | 88 (50 to 175)  | 51.2% (-5.1% to 195.3%)                                 |
| Turkmenistan                       | 1498 (1072 to 1913)       | 2455 (1756 to 3185)       | 50 (36 to 63)                                  | 48 (35 to 62)   | -2.9% (-13.2% to 10.6%)                                 |
| Uzbekistan                         | 8854 (6375 to 11451)      | 16425 (11580 to 21093)    | 53 (37 to 68)                                  | 49 (35 to 63)   | -6.8% (-15.5% to 2.3%)                                  |
| <b>Latin America and Caribbean</b> | 332236 (236429 to 446580) | 502465 (360265 to 641612) | 99 (71 to 129)                                 | 82 (59 to 105)  | -16.8% (-23.3% to -11.6%)                               |
| <b>Central Latin America</b>       | 152900 (104937 to 229866) | 200134 (142895 to 262800) | 110 (77 to 157)                                | 79 (56 to 103)  | -28.2% (-36.5% to -22.5%)                               |

| Location                           | YLD                     |                          |                                                |                 |                                                         |
|------------------------------------|-------------------------|--------------------------|------------------------------------------------|-----------------|---------------------------------------------------------|
|                                    | Numbers<br>(95% UI)     |                          | Age-standardized rates per 100,000<br>(95% UI) |                 | Percentage change of age-standardized rates<br>(95% UI) |
|                                    | (Year 1990)             | (Year 2019)              | (Year 1990)                                    | (Year 2019)     | (Year 1990–Year 2019)                                   |
| Colombia                           | 21868 (15273 to 29497)  | 30489 (20572 to 44447)   | 76 (54 to 100)                                 | 60 (40 to 87)   | -20.9% (-31.5% to -5.8%)                                |
| Costa Rica                         | 1189 (848 to 1554)      | 2299 (1621 to 3010)      | 46 (33 to 59)                                  | 45 (32 to 59)   | -1.7% (-9.7% to 6.7%)                                   |
| El Salvador                        | 14593 (4794 to 41290)   | 7025 (3524 to 16079)     | 280 (95 to 763)                                | 117 (58 to 272) | -58.1% (-65.7% to -38.1%)                               |
| Guatemala                          | 9339 (3905 to 23409)    | 10479 (6703 to 18661)    | 129 (58 to 318)                                | 69 (43 to 127)  | -46.5% (-61.2% to -19%)                                 |
| Honduras                           | 1644 (1189 to 2093)     | 4760 (3333 to 6327)      | 46 (33 to 58)                                  | 54 (38 to 72)   | 18.6% (2.3% to 42.6%)                                   |
| Mexico                             | 83476 (60063 to 105507) | 120381 (86536 to 154329) | 123 (89 to 155)                                | 94 (68 to 121)  | -23.5% (-26.3% to -20.8%)                               |
| Nicaragua                          | 10677 (3015 to 31127)   | 7105 (3061 to 17891)     | 279 (85 to 785)                                | 122 (51 to 309) | -56.3% (-62.6% to -38.9%)                               |
| Panama                             | 1175 (776 to 2105)      | 1936 (1346 to 2667)      | 54 (37 to 92)                                  | 46 (32 to 63)   | -15.1% (-33.7% to -0.8%)                                |
| Venezuela (Bolivarian Republic of) | 8941 (6413 to 11455)    | 15660 (11076 to 20541)   | 55 (40 to 70)                                  | 53 (37 to 69)   | -4.6% (-14.9% to 8%)                                    |
| <b>Andean Latin America</b>        | 17534 (11289 to 29299)  | 26820 (18760 to 38361)   | 52 (35 to 82)                                  | 43 (30 to 62)   | -17.2% (-29.5% to -6.2%)                                |
| Bolivia (Plurinational State of)   | 1861 (1329 to 2351)     | 3779 (2690 to 4811)      | 36 (26 to 45)                                  | 34 (24 to 44)   | -4.1% (-14.5% to 7.3%)                                  |
| Ecuador                            | 3868 (2730 to 5003)     | 7139 (5143 to 9248)      | 47 (33 to 60)                                  | 42 (30 to 54)   | -10.4% (-20.6% to 0.7%)                                 |
| Peru                               | 11805 (6784 to 23027)   | 15903 (10527 to 25226)   | 59 (36 to 108)                                 | 46 (31 to 73)   | -21.7% (-35.3% to -6.6%)                                |
| <b>Caribbean</b>                   | 14906 (10845 to 18906)  | 38262 (24729 to 57334)   | 47 (34 to 59)                                  | 78 (50 to 117)  | 66% (24.4% to 140%)                                     |
| Antigua and Barbuda                | 21 (15 to 27)           | 39 (28 to 51)            | 36 (26 to 47)                                  | 39 (28 to 50)   | 7% (-3.7% to 18.9%)                                     |

| Location                         | YLD                       |                           |                                                |                 |                                                         |
|----------------------------------|---------------------------|---------------------------|------------------------------------------------|-----------------|---------------------------------------------------------|
|                                  | Numbers<br>(95% UI)       |                           | Age-standardized rates per 100,000<br>(95% UI) |                 | Percentage change of age-standardized rates<br>(95% UI) |
|                                  | (Year 1990)               | (Year 2019)               | (Year 1990)                                    | (Year 2019)     | (Year 1990–Year 2019)                                   |
| Bahamas                          | 84 (60 to 107)            | 158 (113 to 204)          | 35 (25 to 45)                                  | 38 (27 to 49)   | 7.3% (-4.3% to 19.8%)                                   |
| Barbados                         | 88 (64 to 112)            | 124 (89 to 159)           | 34 (25 to 43)                                  | 35 (25 to 45)   | 2.7% (-8.5% to 14.3%)                                   |
| Belize                           | 59 (42 to 77)             | 173 (126 to 226)          | 41 (30 to 53)                                  | 45 (33 to 58)   | 8.6% (-1.2% to 19.7%)                                   |
| Bermuda                          | 50 (36 to 65)             | 69 (49 to 89)             | 76 (54 to 98)                                  | 81 (58 to 105)  | 7% (-1.8% to 16.5%)                                     |
| Cuba                             | 5056 (3569 to 6436)       | 6504 (4662 to 8469)       | 46 (33 to 58)                                  | 45 (32 to 59)   | -2.1% (-10.9% to 8.4%)                                  |
| Dominica                         | 24 (17 to 32)             | 32 (23 to 42)             | 36 (26 to 48)                                  | 42 (30 to 54)   | 15.1% (-0.4% to 32.9%)                                  |
| Dominican Republic               | 2235 (1614 to 2834)       | 4755 (3410 to 6125)       | 38 (28 to 48)                                  | 44 (32 to 57)   | 15.7% (4.1% to 28.6%)                                   |
| Grenada                          | 37 (23 to 70)             | 48 (33 to 62)             | 49 (31 to 89)                                  | 42 (30 to 56)   | -13.7% (-40% to 12.3%)                                  |
| Guyana                           | 260 (189 to 331)          | 328 (235 to 416)          | 39 (28 to 49)                                  | 43 (30 to 54)   | 10.3% (-1.2% to 22.8%)                                  |
| Haiti                            | 1824 (1321 to 2337)       | 18498 (8950 to 34403)     | 35 (25 to 44)                                  | 158 (77 to 294) | 354.7% (143.5% to 723.4%)                               |
| Jamaica                          | 786 (568 to 1021)         | 1076 (769 to 1376)        | 38 (27 to 49)                                  | 36 (26 to 46)   | -5.2% (-16.3% to 5.6%)                                  |
| Puerto Rico                      | 3152 (2227 to 4050)       | 4044 (2883 to 5316)       | 87 (61 to 112)                                 | 88 (62 to 116)  | 1.7% (-7.9% to 14.7%)                                   |
| Saint Kitts and Nevis            | 25 (18 to 31)             | 50 (35 to 64)             | 68 (49 to 86)                                  | 74 (52 to 96)   | 9.5% (-1.6% to 21.3%)                                   |
| Saint Lucia                      | 42 (30 to 54)             | 78 (57 to 100)            | 37 (27 to 47)                                  | 39 (28 to 50)   | 6.4% (-4.5% to 18.9%)                                   |
| Saint Vincent and the Grenadines | 32 (23 to 40)             | 47 (33 to 60)             | 35 (25 to 44)                                  | 38 (27 to 48)   | 8.8% (-2.7% to 22.4%)                                   |
| Suriname                         | 160 (108 to 261)          | 249 (178 to 326)          | 45 (30 to 70)                                  | 41 (29 to 54)   | -8.7% (-31.4% to 7.7%)                                  |
| Trinidad and Tobago              | 390 (278 to 506)          | 606 (436 to 779)          | 35 (25 to 45)                                  | 38 (27 to 49)   | 8% (-4% to 21%)                                         |
| United States Virgin Islands     | 84 (61 to 106)            | 88 (63 to 113)            | 80 (58 to 101)                                 | 70 (50 to 90)   | -12.5% (-19.5% to -4.7%)                                |
| <b>Tropical Latin America</b>    | 146895 (104835 to 186002) | 237248 (169890 to 302343) | 111 (80 to 140)                                | 97 (69 to 124)  | -12.9% (-16.6% to -9%)                                  |
| Brazil                           | 145402 (103654 to 184192) | 234431 (167899 to 298702) | 113 (81 to 142)                                | 98 (70 to 126)  | -12.8% (-16.6% to -8.8%)                                |
| Paraguay                         | 1494 (1070 to 1924)       | 2818 (2022 to 3605)       | 46 (33 to 59)                                  | 42 (30 to 53)   | -9.7% (-19% to 0.3%)                                    |

| Location                                      | YLD                         |                              |                                                |                |                                                         |
|-----------------------------------------------|-----------------------------|------------------------------|------------------------------------------------|----------------|---------------------------------------------------------|
|                                               | Numbers<br>(95% UI)         |                              | Age-standardized rates per 100,000<br>(95% UI) |                | Percentage change of age-standardized rates<br>(95% UI) |
|                                               | (Year 1990)                 | (Year 2019)                  | (Year 1990)                                    | (Year 2019)    | (Year 1990–Year 2019)                                   |
| <b>Southeast Asia, East Asia, and Oceania</b> | 1002681 (732643 to 1259197) | 1805371 (1289643 to 2309733) | 65 (48 to 82)                                  | 69 (50 to 89)  | 6.6% (0.1% to 12.2%)                                    |
| <b>East Asia</b>                              | 742342 (531641 to 940603)   | 1388823 (979243 to 1793841)  | 65 (46 to 82)                                  | 72 (51 to 94)  | 11.1% (5% to 16.9%)                                     |
| China                                         | 731470 (523591 to 926331)   | 1373726 (968118 to 1774815)  | 66 (47 to 84)                                  | 74 (52 to 96)  | 11.4% (5.2% to 17.3%)                                   |
| Democratic People's Republic of Korea         | 4753 (3395 to 6097)         | 7008 (5007 to 9073)          | 24 (17 to 30)                                  | 23 (16 to 29)  | -5.3% (-16.1% to 6.9%)                                  |
| Taiwan (Province of China)                    | 6119 (4255 to 8025)         | 8089 (5746 to 10379)         | 31 (22 to 41)                                  | 25 (18 to 32)  | -19.9% (-28.7% to -10.2%)                               |
| <b>Southeast Asia</b>                         | 258828 (180465 to 372095)   | 412470 (297995 to 546543)    | 65 (46 to 89)                                  | 59 (43 to 77)  | -9.3% (-22.4% to -0.7%)                                 |
| Cambodia                                      | 13370 (3463 to 42654)       | 10238 (5454 to 22190)        | 137 (41 to 421)                                | 67 (35 to 146) | -51.2% (-67.5% to -7.9%)                                |
| Indonesia                                     | 138111 (102139 to 173454)   | 210217 (153290 to 266273)    | 89 (66 to 111)                                 | 79 (57 to 99)  | -11.5% (-17.9% to -6%)                                  |
| Lao People's Democratic Republic              | 1114 (814 to 1425)          | 2208 (1612 to 2785)          | 34 (25 to 43)                                  | 34 (25 to 43)  | -0.3% (-11.3% to 13%)                                   |
| Malaysia                                      | 5366 (3824 to 6836)         | 11627 (8356 to 15152)        | 37 (26 to 47)                                  | 36 (26 to 47)  | -1% (-11.4% to 9.7%)                                    |
| Maldives                                      | 44 (32 to 57)               | 164 (116 to 219)             | 29 (21 to 36)                                  | 32 (23 to 42)  | 12% (-3% to 28.5%)                                      |
| Mauritius                                     | 622 (444 to 798)            | 1072 (778 to 1385)           | 60 (43 to 77)                                  | 69 (50 to 89)  | 16.5% (6.5% to 28.1%)                                   |
| Myanmar                                       | 18809 (10422 to 43265)      | 33553 (21725 to 50386)       | 50 (29 to 108)                                 | 61 (40 to 90)  | 21.5% (-27.4% to 83.6%)                                 |
| Philippines                                   | 26715 (16967 to 47094)      | 43970 (30346 to 63181)       | 51 (33 to 84)                                  | 43 (30 to 61)  | -16.1% (-31.3% to -5.4%)                                |
| Seychelles                                    | 43 (31 to 54)               | 81 (58 to 104)               | 67 (49 to 85)                                  | 70 (50 to 89)  | 4.2% (-5.1% to 13.7%)                                   |



| Location                         | YLD                    |                        |                                                |                 |                                                         |
|----------------------------------|------------------------|------------------------|------------------------------------------------|-----------------|---------------------------------------------------------|
|                                  | Numbers<br>(95% UI)    |                        | Age-standardized rates per 100,000<br>(95% UI) |                 | Percentage change of age-standardized rates<br>(95% UI) |
|                                  | (Year 1990)            | (Year 2019)            | (Year 1990)                                    | (Year 2019)     | (Year 1990–Year 2019)                                   |
| Sri Lanka                        | 10662 (6172 to 20907)  | 24070 (12260 to 51620) | 64 (39 to 120)                                 | 102 (51 to 222) | 58.3% (18.7% to 104.8%)                                 |
| Thailand                         | 23282 (16627 to 29397) | 31982 (23052 to 41443) | 44 (32 to 56)                                  | 36 (26 to 47)   | -18.5% (-27.3% to -8.7%)                                |
| Timor-Leste                      | 1261 (429 to 3464)     | 1479 (569 to 3897)     | 167 (60 to 449)                                | 143 (55 to 377) | -13.8% (-21% to -3.4%)                                  |
| Viet Nam                         | 19083 (14045 to 24179) | 41271 (29846 to 53245) | 35 (26 to 45)                                  | 39 (28 to 50)   | 10.7% (-0.9% to 22.5%)                                  |
| <b>Oceania</b>                   | 1511 (1114 to 1906)    | 4077 (2923 to 5215)    | 30 (22 to 37)                                  | 36 (26 to 46)   | 21.8% (9.6% to 35.9%)                                   |
| American Samoa                   | 24 (17 to 31)          | 37 (27 to 48)          | 64 (46 to 81)                                  | 70 (50 to 90)   | 9.8% (-1.8% to 25.5%)                                   |
| Cook Islands                     | 11 (8 to 15)           | 15 (10 to 19)          | 70 (50 to 91)                                  | 72 (50 to 93)   | 2.5% (-8.3% to 14.2%)                                   |
| Fiji                             | 172 (123 to 221)       | 261 (188 to 336)       | 26 (19 to 33)                                  | 28 (21 to 37)   | 9% (-2.8% to 23.3%)                                     |
| Guam                             | 79 (57 to 103)         | 119 (85 to 153)        | 65 (47 to 84)                                  | 66 (48 to 85)   | 1.8% (-6.7% to 10.4%)                                   |
| Kiribati                         | 13 (9 to 16)           | 24 (18 to 32)          | 20 (14 to 25)                                  | 22 (16 to 29)   | 13.4% (-3.8% to 34.3%)                                  |
| Marshall Islands                 | 9 (6 to 11)            | 15 (11 to 20)          | 28 (20 to 35)                                  | 28 (21 to 36)   | 2.3% (-8.9% to 13.9%)                                   |
| Micronesia (Federated States of) | 21 (15 to 27)          | 29 (21 to 37)          | 28 (20 to 35)                                  | 30 (22 to 39)   | 9.9% (-3.7% to 25%)                                     |
| Nauru                            | 4 (3 to 6)             | 5 (4 to 7)             | 53 (39 to 68)                                  | 58 (42 to 76)   | 9.8% (-1.2% to 21.3%)                                   |
| Niue                             | 1 (1 to 1)             | 1 (1 to 1)             | 53 (38 to 68)                                  | 62 (45 to 81)   | 17.5% (4.5% to 32%)                                     |
| Northern Mariana Islands         | 29 (21 to 38)          | 36 (26 to 47)          | 71 (51 to 92)                                  | 70 (51 to 91)   | -1.5% (-9.6% to 7.2%)                                   |
| Palau                            | 10 (7 to 13)           | 17 (12 to 22)          | 72 (51 to 93)                                  | 78 (56 to 101)  | 9% (-2.3% to 21.4%)                                     |
| Papua New Guinea                 | 882 (641 to 1113)      | 2956 (2106 to 3811)    | 28 (20 to 35)                                  | 36 (26 to 46)   | 29.8% (12.9% to 50.1%)                                  |
| Samoa                            | 37 (26 to 47)          | 79 (54 to 108)         | 29 (21 to 37)                                  | 42 (29 to 57)   | 44.1% (19% to 79.9%)                                    |
| Solomon Islands                  | 75 (54 to 99)          | 175 (126 to 225)       | 30 (22 to 39)                                  | 32 (23 to 41)   | 7.7% (-5.6% to 21.6%)                                   |
| Tokelau                          | 1 (1 to 1)             | 1 (1 to 1)             | 53 (38 to 67)                                  | 60 (43 to 77)   | 13.5% (2% to 25.3%)                                     |
| Tonga                            | 20 (14 to 26)          | 25 (18 to 32)          | 27 (19 to 35)                                  | 27 (20 to 36)   | 1.7% (-11.3% to 16.3%)                                  |

| Location                            | YLD                       |                            |                                                |                  |                                                         |
|-------------------------------------|---------------------------|----------------------------|------------------------------------------------|------------------|---------------------------------------------------------|
|                                     | Numbers<br>(95% UI)       |                            | Age-standardized rates per 100,000<br>(95% UI) |                  | Percentage change of age-standardized rates<br>(95% UI) |
|                                     | (Year 1990)               | (Year 2019)                | (Year 1990)                                    | (Year 2019)      | (Year 1990–Year 2019)                                   |
| Tuvalu                              | 4 (3 to 5)                | 6 (5 to 8)                 | 50 (36 to 63)                                  | 56 (41 to 72)    | 13.4% (1.5% to 27%)                                     |
| Vanuatu                             | 34 (24 to 46)             | 84 (59 to 112)             | 29 (20 to 38)                                  | 33 (24 to 44)    | 15.3% (0.2% to 31.9%)                                   |
| <b>North Africa and Middle East</b> | 304143 (139079 to 722558) | 564189 (289631 to 1229092) | 97 (48 to 219)                                 | 92 (48 to 199)   | -5.4% (-27.6% to 12.3%)                                 |
| <b>North Africa and Middle East</b> | 304143 (139079 to 722558) | 564189 (289631 to 1229092) | 97 (48 to 219)                                 | 92 (48 to 199)   | -5.4% (-27.6% to 12.3%)                                 |
| Afghanistan                         | 76762 (9561 to 311279)    | 98889 (26400 to 287537)    | 694 (91 to 2785)                               | 342 (87 to 1016) | -50.7% (-67.5% to 33%)                                  |
| Algeria                             | 8738 (6214 to 11266)      | 21542 (14186 to 32871)     | 45 (32 to 57)                                  | 50 (33 to 76)    | 12.2% (-11.6% to 62.6%)                                 |
| Bahrain                             | 191 (136 to 251)          | 716 (501 to 939)           | 40 (29 to 52)                                  | 39 (28 to 51)    | -2.1% (-13.7% to 11.7%)                                 |
| Egypt                               | 14451 (10269 to 18383)    | 28971 (20531 to 37521)     | 31 (22 to 39)                                  | 31 (22 to 40)    | 0.7% (-11.7% to 16.9%)                                  |
| Iran (Islamic Republic of)          | 58541 (29148 to 128645)   | 58925 (36923 to 97182)     | 122 (63 to 265)                                | 63 (40 to 102)   | -48.3% (-62.5% to -29.6%)                               |
| Iraq                                | 59709 (18003 to 169919)   | 106419 (35020 to 295453)   | 370 (113 to 1039)                              | 265 (90 to 729)  | -28.6% (-37.1% to -18.4%)                               |
| Jordan                              | 973 (690 to 1251)         | 3679 (2567 to 4814)        | 36 (25 to 45)                                  | 34 (24 to 45)    | -3.2% (-14.6% to 11.5%)                                 |
| Kuwait                              | 810 (547 to 1160)         | 2655 (1727 to 4220)        | 50 (34 to 68)                                  | 52 (34 to 80)    | 4.4% (-10.2% to 21%)                                    |
| Lebanon                             | 10077 (2378 to 32728)     | 7227 (2416 to 20570)       | 322 (78 to 1057)                               | 135 (45 to 386)  | -58.1% (-63.8% to -41.5%)                               |
| Libya                               | 2072 (1260 to 3768)       | 7366 (3820 to 15730)       | 60 (39 to 98)                                  | 100 (52 to 215)  | 67.9% (21.6% to 123.9%)                                 |
| Morocco                             | 10116 (7230 to 13770)     | 15820 (11427 to 20411)     | 47 (34 to 63)                                  | 43 (31 to 55)    | -9.1% (-21.4% to 2.7%)                                  |

| Location             | YLD                       |                             |                                                |                   |                                                         |
|----------------------|---------------------------|-----------------------------|------------------------------------------------|-------------------|---------------------------------------------------------|
|                      | Numbers<br>(95% UI)       |                             | Age-standardized rates per 100,000<br>(95% UI) |                   | Percentage change of age-standardized rates<br>(95% UI) |
|                      | (Year 1990)               | (Year 2019)                 | (Year 1990)                                    | (Year 2019)       | (Year 1990–Year 2019)                                   |
| Oman                 | 739 (530 to 954)          | 2116 (1481 to 2770)         | 48 (35 to 62)                                  | 44 (31 to 58)     | -7.8% (-17.9% to 4.1%)                                  |
| Palestine            | 5353 (1742 to 14840)      | 13321 (4255 to 37063)       | 283 (97 to 746)                                | 309 (100 to 843)  | 9.3% (-5.8% to 17.9%)                                   |
| Qatar                | 255 (183 to 323)          | 1525 (1072 to 2024)         | 57 (41 to 71)                                  | 47 (33 to 61)     | -17.5% (-26.8% to -8.3%)                                |
| Saudi Arabia         | 8009 (5687 to 10303)      | 28027 (19946 to 36763)      | 66 (48 to 85)                                  | 71 (50 to 92)     | 6.2% (-3.8% to 16.6%)                                   |
| Sudan                | 12460 (8534 to 19490)     | 31938 (20436 to 55444)      | 79 (56 to 116)                                 | 96 (63 to 164)    | 22.2% (5.5% to 42.6%)                                   |
| Syrian Arab Republic | 6334 (2931 to 15535)      | 56665 (16102 to 159728)     | 59 (31 to 139)                                 | 403 (113 to 1150) | 579.2% (218.2% to 1263.6%)                              |
| Tunisia              | 2730 (1975 to 3497)       | 4717 (3406 to 6139)         | 39 (28 to 50)                                  | 37 (26 to 48)     | -5.7% (-16% to 5.6%)                                    |
| Turkey               | 18251 (13258 to 23147)    | 40162 (27330 to 56767)      | 35 (25 to 45)                                  | 44 (30 to 62)     | 24.2% (3.7% to 55.5%)                                   |
| United Arab Emirates | 880 (633 to 1129)         | 5464 (3826 to 7080)         | 48 (35 to 61)                                  | 43 (31 to 55)     | -11.1% (-21.3% to -1.1%)                                |
| Yemen                | 6487 (3619 to 13350)      | 27471 (12186 to 66369)      | 59 (36 to 109)                                 | 101 (46 to 238)   | 70.7% (18.8% to 131.1%)                                 |
| <b>South Asia</b>    | 494741 (363959 to 612135) | 1076209 (779951 to 1354932) | 56 (42 to 70)                                  | 63 (46 to 79)     | 11.9% (7.6% to 17%)                                     |
| <b>South Asia</b>    | 494741 (363959 to 612135) | 1076209 (779951 to 1354932) | 56 (42 to 70)                                  | 63 (46 to 79)     | 11.9% (7.6% to 17%)                                     |
| Bangladesh           | 32876 (23818 to 42290)    | 77231 (55316 to 100459)     | 40 (29 to 51)                                  | 50 (36 to 64)     | 24% (11% to 38.2%)                                      |
| Bhutan               | 201 (144 to 251)          | 399 (292 to 506)            | 45 (32 to 56)                                  | 55 (40 to 69)     | 22.8% (10.6% to 37.1%)                                  |

| Location                           | YLD                       |                            |                                                |                |                                                         |
|------------------------------------|---------------------------|----------------------------|------------------------------------------------|----------------|---------------------------------------------------------|
|                                    | Numbers<br>(95% UI)       |                            | Age-standardized rates per 100,000<br>(95% UI) |                | Percentage change of age-standardized rates<br>(95% UI) |
|                                    | (Year 1990)               | (Year 2019)                | (Year 1990)                                    | (Year 2019)    | (Year 1990–Year 2019)                                   |
| India                              | 425838 (312874 to 527008) | 887447 (644356 to 1112943) | 61 (45 to 75)                                  | 66 (48 to 82)  | 8% (4.1% to 11.6%)                                      |
| Nepal                              | 6953 (5034 to 8814)       | 18091 (12597 to 24724)     | 47 (34 to 58)                                  | 64 (45 to 87)  | 37.6% (17.1% to 70.8%)                                  |
| Pakistan                           | 28874 (21063 to 36036)    | 93040 (65998 to 127413)    | 35 (26 to 44)                                  | 51 (36 to 67)  | 42.7% (25.2% to 72.6%)                                  |
| <b>Sub-Saharan Africa</b>          | 285149 (188516 to 479224) | 635020 (432096 to 1003966) | 75 (52 to 119)                                 | 77 (54 to 119) | 3.6% (-1% to 8%)                                        |
| <b>Southern Sub-Saharan Africa</b> | 31705 (22957 to 40483)    | 41857 (29959 to 52588)     | 75 (54 to 95)                                  | 56 (40 to 71)  | -25.2% (-30.8% to -21.5%)                               |
| Botswana                           | 561 (412 to 719)          | 1274 (907 to 1617)         | 56 (41 to 71)                                  | 57 (41 to 72)  | 1.6% (-7.7% to 11%)                                     |
| Eswatini                           | 321 (232 to 406)          | 514 (364 to 646)           | 57 (41 to 71)                                  | 52 (37 to 65)  | -9% (-17.2% to -1%)                                     |
| Lesotho                            | 788 (562 to 993)          | 984 (707 to 1254)          | 55 (39 to 68)                                  | 50 (36 to 63)  | -8.8% (-18.1% to 1.3%)                                  |
| Namibia                            | 1241 (695 to 2583)        | 1421 (1015 to 1872)        | 104 (62 to 200)                                | 68 (49 to 91)  | -34.3% (-58.3% to -9.7%)                                |
| South Africa                       | 24873 (17886 to 31878)    | 31489 (22407 to 39715)     | 81 (58 to 103)                                 | 57 (41 to 71)  | -29.5% (-35.4% to -25.5%)                               |
| Zimbabwe                           | 3920 (2824 to 5003)       | 6175 (4495 to 7836)        | 54 (38 to 68)                                  | 51 (37 to 64)  | -5.5% (-13.4% to 4%)                                    |
| <b>Western Sub-Saharan Africa</b>  | 92325 (67628 to 115005)   | 248091 (181695 to 324936)  | 67 (49 to 84)                                  | 76 (55 to 98)  | 12.7% (7.9% to 22.6%)                                   |
| Benin                              | 2223 (1613 to 2804)       | 6408 (4564 to 8217)        | 70 (51 to 88)                                  | 75 (54 to 95)  | 6.9% (-1.8% to 15.3%)                                   |
| Burkina Faso                       | 3910 (2830 to 4923)       | 11871 (8646 to 14957)      | 60 (44 to 76)                                  | 77 (56 to 96)  | 27.4% (17.5% to 38.4%)                                  |
| Cabo Verde                         | 172 (123 to 217)          | 381 (274 to 483)           | 66 (48 to 83)                                  | 72 (52 to 92)  | 9.3% (-0.1% to 18.9%)                                   |

| Location                          | YLD                      |                           |                                                |                 |                                                         |
|-----------------------------------|--------------------------|---------------------------|------------------------------------------------|-----------------|---------------------------------------------------------|
|                                   | Numbers<br>(95% UI)      |                           | Age-standardized rates per 100,000<br>(95% UI) |                 | Percentage change of age-standardized rates<br>(95% UI) |
|                                   | (Year 1990)              | (Year 2019)               | (Year 1990)                                    | (Year 2019)     | (Year 1990–Year 2019)                                   |
| Cameroon                          | 5866 (4309 to 7377)      | 17898 (12839 to 23285)    | 82 (60 to 103)                                 | 83 (60 to 106)  | 1.3% (-7.4% to 11.4%)                                   |
| Chad                              | 4323 (2513 to 8625)      | 8833 (6084 to 13034)      | 95 (59 to 174)                                 | 87 (61 to 127)  | -8.5% (-28.9% to 13.2%)                                 |
| Côte d'Ivoire                     | 5561 (3972 to 6998)      | 14737 (10567 to 18642)    | 68 (49 to 84)                                  | 75 (54 to 94)   | 10.8% (2% to 21%)                                       |
| Gambia                            | 487 (342 to 711)         | 1107 (798 to 1405)        | 71 (51 to 97)                                  | 68 (50 to 86)   | -4.5% (-20% to 7.7%)                                    |
| Ghana                             | 7883 (5582 to 9921)      | 22174 (15891 to 28290)    | 74 (53 to 93)                                  | 86 (62 to 109)  | 16.2% (7.7% to 24.7%)                                   |
| Guinea                            | 3086 (2202 to 3879)      | 6731 (4870 to 8518)       | 68 (49 to 85)                                  | 76 (56 to 96)   | 11.3% (2.1% to 21.5%)                                   |
| Guinea-Bissau                     | 541 (393 to 678)         | 1184 (852 to 1523)        | 76 (55 to 95)                                  | 83 (61 to 106)  | 9.6% (-0.1% to 23.1%)                                   |
| Liberia                           | 1189 (810 to 1884)       | 3991 (2373 to 7994)       | 77 (54 to 113)                                 | 105 (63 to 203) | 37.1% (7.1% to 82%)                                     |
| Mali                              | 4043 (2894 to 5063)      | 13001 (8825 to 20343)     | 66 (47 to 83)                                  | 88 (62 to 138)  | 33.8% (10.1% to 88.8%)                                  |
| Mauritania                        | 1351 (979 to 1701)       | 2685 (1935 to 3434)       | 92 (67 to 116)                                 | 89 (64 to 114)  | -2.8% (-9.4% to 4.2%)                                   |
| Niger                             | 3532 (2571 to 4467)      | 10196 (7356 to 12935)     | 68 (50 to 85)                                  | 73 (53 to 92)   | 6.6% (-1.7% to 16%)                                     |
| Nigeria                           | 41034 (29577 to 51422)   | 107235 (77703 to 141553)  | 62 (45 to 78)                                  | 69 (50 to 89)   | 11.4% (5% to 25.7%)                                     |
| Sao Tome and Principe             | 67 (48 to 85)            | 145 (103 to 185)          | 78 (56 to 98)                                  | 88 (63 to 112)  | 13.4% (4.8% to 21.6%)                                   |
| Senegal                           | 3421 (2430 to 4303)      | 8308 (6023 to 10410)      | 66 (47 to 84)                                  | 74 (54 to 92)   | 10.9% (3.2% to 21.2%)                                   |
| Sierra Leone                      | 1766 (1285 to 2206)      | 6286 (4171 to 10476)      | 65 (48 to 81)                                  | 101 (67 to 167) | 55.4% (19% to 138.8%)                                   |
| Togo                              | 1867 (1351 to 2362)      | 4915 (3518 to 6243)       | 77 (55 to 97)                                  | 79 (57 to 99)   | 2.5% (-4.9% to 10.6%)                                   |
| <b>Eastern Sub-Saharan Africa</b> | 137377 (79383 to 292137) | 279864 (176063 to 502643) | 89 (55 to 175)                                 | 90 (57 to 161)  | 1.1% (-10.4% to 8.8%)                                   |

| Location                    | YLD                    |                         |                                                |                  |                                                         |
|-----------------------------|------------------------|-------------------------|------------------------------------------------|------------------|---------------------------------------------------------|
|                             | Numbers<br>(95% UI)    |                         | Age-standardized rates per 100,000<br>(95% UI) |                  | Percentage change of age-standardized rates<br>(95% UI) |
|                             | (Year 1990)            | (Year 2019)             | (Year 1990)                                    | (Year 2019)      | (Year 1990–Year 2019)                                   |
| Burundi                     | 1295 (929 to 1654)     | 29623 (9258 to 84723)   | 31 (23 to 39)                                  | 306 (98 to 849)  | 883.9% (217.8% to 2582.5%)                              |
| Comoros                     | 334 (246 to 421)       | 678 (490 to 855)        | 99 (72 to 125)                                 | 106 (77 to 133)  | 7.2% (-0.2% to 14.6%)                                   |
| Djibouti                    | 297 (215 to 375)       | 952 (678 to 1230)       | 88 (64 to 111)                                 | 91 (65 to 117)   | 3.2% (-6.4% to 15.6%)                                   |
| Eritrea                     | 12654 (3458 to 39163)  | 9577 (4639 to 23553)    | 444 (132 to 1272)                              | 183 (90 to 458)  | -58.8% (-68.2% to -30.2%)                               |
| Ethiopia                    | 34524 (16633 to 80823) | 56868 (30373 to 121962) | 75 (40 to 161)                                 | 72 (39 to 155)   | -4.2% (-17.5% to 20%)                                   |
| Kenya                       | 5256 (3826 to 6541)    | 15246 (11075 to 20379)  | 33 (24 to 41)                                  | 36 (27 to 47)    | 11.1% (2% to 31.2%)                                     |
| Madagascar                  | 7170 (5120 to 8972)    | 17061 (12159 to 21638)  | 83 (59 to 103)                                 | 82 (59 to 104)   | -0.5% (-8.3% to 8.6%)                                   |
| Malawi                      | 4380 (3111 to 5585)    | 9618 (6811 to 12315)    | 62 (45 to 79)                                  | 70 (50 to 87)    | 11.8% (3.4% to 21%)                                     |
| Mozambique                  | 21792 (9745 to 57111)  | 20719 (14681 to 29422)  | 196 (97 to 475)                                | 102 (72 to 150)  | -48% (-69.8% to -14.4%)                                 |
| Rwanda                      | 4886 (3490 to 6178)    | 25354 (11173 to 61782)  | 93 (67 to 117)                                 | 242 (109 to 579) | 159.4% (28.5% to 491.7%)                                |
| Somalia                     | 5141 (2845 to 14541)   | 16214 (10017 to 30965)  | 91 (54 to 224)                                 | 106 (67 to 192)  | 16.4% (-38.5% to 74.2%)                                 |
| South Sudan                 | 5006 (3293 to 8245)    | 9635 (5876 to 18305)    | 111 (77 to 173)                                | 136 (87 to 248)  | 22.8% (4.4% to 47%)                                     |
| Uganda                      | 18110 (8333 to 46907)  | 26128 (18352 to 37337)  | 125 (62 to 297)                                | 93 (65 to 134)   | -25.7% (-56.4% to 17.9%)                                |
| United Republic of Tanzania | 13056 (9286 to 16460)  | 32929 (23333 to 41503)  | 70 (51 to 88)                                  | 78 (56 to 99)    | 11.5% (3.6% to 20.7%)                                   |

| Location                          | YLD                    |                         |                                                |                |                                                         |
|-----------------------------------|------------------------|-------------------------|------------------------------------------------|----------------|---------------------------------------------------------|
|                                   | Numbers<br>(95% UI)    |                         | Age-standardized rates per 100,000<br>(95% UI) |                | Percentage change of age-standardized rates<br>(95% UI) |
|                                   | (Year 1990)            | (Year 2019)             | (Year 1990)                                    | (Year 2019)    | (Year 1990–Year 2019)                                   |
| Zambia                            | 3375 (2402 to 4242)    | 9038 (6509 to 11379)    | 61 (44 to 75)                                  | 66 (48 to 83)  | 9.1% (0.3% to 18.6%)                                    |
| <b>Central Sub-Saharan Africa</b> | 23742 (12722 to 50625) | 65208 (33786 to 145484) | 50 (29 to 97)                                  | 62 (33 to 135) | 25.3% (8.7% to 40.1%)                                   |
| Angola                            | 14892 (5002 to 40955)  | 18968 (8592 to 46506)   | 150 (55 to 393)                                | 89 (40 to 218) | -40.7% (-48.1% to -25.2%)                               |
| Central African Republic          | 469 (339 to 604)       | 4095 (1737 to 10241)    | 22 (16 to 28)                                  | 79 (36 to 189) | 263.5% (71.3% to 729%)                                  |
| Congo                             | 460 (331 to 594)       | 3607 (1642 to 8799)     | 24 (18 to 31)                                  | 75 (35 to 177) | 208.6% (54.6% to 598.3%)                                |
| Democratic Republic of the Congo  | 7603 (5389 to 9605)    | 37780 (20750 to 78035)  | 27 (19 to 33)                                  | 53 (30 to 104) | 99.1% (25.4% to 273.4%)                                 |
| Equatorial Guinea                 | 80 (57 to 100)         | 293 (209 to 379)        | 24 (18 to 31)                                  | 26 (19 to 34)  | 7.6% (-5.1% to 22.1%)                                   |
| Gabon                             | 237 (173 to 302)       | 465 (335 to 599)        | 30 (22 to 38)                                  | 30 (22 to 38)  | -0.7% (-11.6% to 11.4%)                                 |

Abbreviations: YLDs, years lived with disability; UI, uncertainty interval
