# Supplementary material for: Global, regional and national burden of traumatic brain injury and spinal cord injury, 1990–2019: a systematic analysis for the Global Burden of Disease Study 2019
Source: PubMed Central journal article supplement — BMJ Open. 2023 Oct 6;13(10):e075049. doi: 10.1136/bmjopen-2023-075049 (PMC10565269; doi:10.1136/bmjopen-2023-075049), 2023-10-06
Supplement: bmjopen-2023-075049supp021.pdf [file bmjopen-2023-075049supp021.pdf]

**eTable 14. Incidence for 1990 and 2019 and percentage changes of age-standardized rates by location and cause for traumatic brain injury, 1990–2019**

| Location    | Cause                                           | Age-                              | Age-                      | Percentage change of age-                  |
|-------------|-------------------------------------------------|-----------------------------------|---------------------------|--------------------------------------------|
|             |                                                 | standardized<br>rates per 100.000 | standardized<br>rates per | standardized rates<br>(95% UI) (1990–2019) |
| Afghanistan | Adverse effects of medical treatment            | 0 (0 to 0)                        | 0 (0 to 0)                | 0% (0% to 0%)                              |
| Afghanistan | Conflict and terrorism                          | 81 (31 to 192)                    | 356 (134 to 798)          | NA                                         |
| Afghanistan | Cyclist road injuries                           | 13 (8 to 18)                      | 11 (8 to 16)              | -11% (-19% to -2.3%)                       |
| Afghanistan | Drowning                                        | 0 (0 to 0)                        | 0 (0 to 0)                | -21.3% (0% to -14.7%)                      |
| Afghanistan | Environmental heat and cold exposure            | 2 (2 to 3)                        | 2 (1 to 3)                | -1% (-5.5% to 5%)                          |
| Afghanistan | Executions and police conflict                  | 0 (0 to 0)                        | 2 (1 to 3)                | NA                                         |
| Afghanistan | Exposure to forces of nature                    | 0 (0 to 0)                        | 2 (1 to 3)                | NA                                         |
| Afghanistan | Falls                                           | 44 (34 to 59)                     | 55 (42 to 72)             | 24.2% (19.4% to 28.9%)                     |
| Afghanistan | Fire, heat, and hot substances                  | 0 (0 to 1)                        | 0 (0 to 1)                | -7.4% (-14.7% to 1.7%)                     |
| Afghanistan | Foreign body in eyes                            | 0 (0 to 0)                        | 0 (0 to 0)                | 1% (0% to 2.7%)                            |
| Afghanistan | Foreign body in other body part                 | 1 (1 to 3)                        | 1 (1 to 3)                | -1.3% (-5.7% to 4.1%)                      |
| Afghanistan | Motor vehicle road injuries                     | 28 (22 to 37)                     | 23 (17 to 30)             | -20.2% (-27.4% to -12.5%)                  |
| Afghanistan | Motorcyclist road injuries                      | 9 (7 to 12)                       | 8 (6 to 11)               | -9.2% (-18.5% to 0.1%)                     |
| Afghanistan | Non-venomous animal contact                     | 6 (3 to 10)                       | 6 (3 to 10)               | -3.1% (-8.9% to 2.6%)                      |
| Afghanistan | Other exposure to mechanical forces             | 27 (17 to 42)                     | 26 (16 to 41)             | -4.6% (-10.1% to 1.1%)                     |
| Afghanistan | Other road injuries                             | 1 (1 to 2)                        | 1 (1 to 2)                | -5.8% (-16.3% to 5.4%)                     |
| Afghanistan | Other transport injuries                        | 5 (3 to 6)                        | 5 (4 to 6)                | 6.1% (0.9% to 11.8%)                       |
| Afghanistan | Other unintentional injuries                    | 26 (18 to 42)                     | 21 (14 to 32)             | -22.2% (-26.4% to -17.1%)                  |
| Afghanistan | Pedestrian road injuries                        | 22 (16 to 28)                     | 18 (13 to 23)             | -18.6% (-25.5% to -11.9%)                  |
| Afghanistan | Physical violence by firearm                    | 0 (0 to 0)                        | 0 (0 to 0)                | 45% (20.6% to 75.7%)                       |
| Afghanistan | Physical violence by other means                | 27 (19 to 37)                     | 27 (19 to 38)             | 1.8% (-5.7% to 9.1%)                       |
| Afghanistan | Physical violence by sharp object               | 2 (2 to 4)                        | 2 (1 to 3)                | -19.8% (-28% to -11.2%)                    |
| Afghanistan | Poisoning by carbon monoxide                    | 0 (0 to 0)                        | 0 (0 to 0)                | 30.9% (18.2% to 45.6%)                     |
| Afghanistan | Poisoning by other means                        | 0 (0 to 0)                        | 0 (0 to 0)                | -16.5% (-24.2% to -8.8%)                   |
| Afghanistan | Pulmonary aspiration and foreign body in airway | 0 (0 to 1)                        | 0 (0 to 1)                | -22.3% (-31.1% to -13.1%)                  |
| Afghanistan | Self-harm by firearm                            | 0 (0 to 0)                        | 0 (0 to 0)                | 14.6% (3.2% to 27.3%)                      |
| Afghanistan | Self-harm by other specified means              | 1 (1 to 2)                        | 1 (1 to 1)                | -10.7% (-15.7% to -5.6%)                   |
| Afghanistan | Unintentional firearm injuries                  | 1 (1 to 2)                        | 1 (1 to 2)                | -2.2% (-10.8% to 7.5%)                     |
| Afghanistan | Venomous animal contact                         | 3 (1 to 7)                        | 3 (1 to 7)                | -1.3% (-8.1% to 6.5%)                      |
| Albania     | Adverse effects of medical treatment            | 0 (0 to 0)                        | 0 (0 to 0)                | 0% (0% to 0%)                              |
| Albania     | Conflict and terrorism                          | 0 (0 to 0)                        | 0 (0 to 0)                | NA                                         |
| Albania     | Cyclist road injuries                           | 55 (39 to 72)                     | 60 (43 to 79)             | 9.3% (0.8% to 18.9%)                       |
| Albania     | Drowning                                        | 0 (0 to 0)                        | 0 (0 to 1)                | 89.2% (66.9% to 115%)                      |
| Albania     | Environmental heat and cold exposure            | 2 (1 to 2)                        | 2 (1 to 2)                | 2.9% (-1.2% to 7.4%)                       |
| Albania     | Executions and police conflict                  | 0 (0 to 0)                        | 0 (0 to 0)                | NA                                         |
| Albania     | Exposure to forces of nature                    | 0 (0 to 0)                        | 0 (0 to 0)                | NA                                         |
| Albania     | Falls                                           | 130 (97 to 175)                   | 202 (153 to 271)          | 55.6% (49.5% to 61.7%)                     |
| Albania     | Fire, heat, and hot substances                  | 3 (2 to 6)                        | 3 (2 to 6)                | 2.6% (-3% to 7.8%)                         |
| Albania     | Foreign body in eyes                            | 0 (0 to 0)                        | 0 (0 to 0)                | -0.2% (-1% to 0.5%)                        |

|         |                                                 |                  |                  |                           |
|---------|-------------------------------------------------|------------------|------------------|---------------------------|
| Albania | Foreign body in other body part                 | 3 (1 to 5)       | 2 (1 to 5)       | -0.9% (-7.1% to 4.6%)     |
| Albania | Motor vehicle road injuries                     | 78 (61 to 100)   | 84 (64 to 107)   | 7.6% (-1.3% to 16.7%)     |
| Albania | Motorcyclist road injuries                      | 11 (8 to 14)     | 15 (11 to 21)    | 45.8% (29.2% to 65.2%)    |
| Albania | Non-venomous animal contact                     | 7 (4 to 13)      | 6 (3 to 10)      | -19.6% (-24.2% to -14.3%) |
| Albania | Other exposure to mechanical forces             | 258 (164 to 402) | 172 (110 to 267) | -33.2% (-38.5% to -26.5%) |
| Albania | Other road injuries                             | 1 (1 to 2)       | 2 (1 to 3)       | 6.2% (-3.5% to 17.7%)     |
| Albania | Other transport injuries                        | 8 (6 to 10)      | 7 (5 to 9)       | -14.5% (-20.5% to -9.7%)  |
| Albania | Other unintentional injuries                    | 46 (30 to 73)    | 31 (19 to 50)    | -33.6% (-40.5% to -28.1%) |
| Albania | Pedestrian road injuries                        | 40 (31 to 51)    | 39 (29 to 49)    | -3.7% (-12.2% to 5.4%)    |
| Albania | Physical violence by firearm                    | 1 (1 to 2)       | 1 (0 to 1)       | -43.4% (-54.1% to -30.4%) |
| Albania | Physical violence by other means                | 49 (35 to 69)    | 25 (17 to 35)    | -49.4% (-56% to -42.9%)   |
| Albania | Physical violence by sharp object               | 4 (3 to 7)       | 2 (1 to 3)       | -61% (-69.1% to -52.6%)   |
| Albania | Poisoning by carbon monoxide                    | 0 (0 to 0)       | 0 (0 to 0)       | 41% (30.2% to 55.6%)      |
| Albania | Poisoning by other means                        | 1 (0 to 1)       | 1 (0 to 1)       | -2.1% (-8.4% to 4.6%)     |
| Albania | Pulmonary aspiration and foreign body in airway | 1 (1 to 2)       | 1 (0 to 2)       | -16% (-22.8% to -8.9%)    |
| Albania | Self-harm by firearm                            | 0 (0 to 0)       | 0 (0 to 1)       | 72.4% (53.6% to 94.8%)    |
| Albania | Self-harm by other specified means              | 1 (1 to 2)       | 2 (1 to 3)       | 65.8% (54% to 77.6%)      |
| Albania | Unintentional firearm injuries                  | 2 (1 to 3)       | 1 (0 to 1)       | -58.5% (-65.2% to -51.5%) |
| Albania | Venomous animal contact                         | 6 (3 to 12)      | 5 (2 to 9)       | -20.6% (-25.5% to -14.7%) |
| Algeria | Adverse effects of medical treatment            | 0 (0 to 0)       | 0 (0 to 0)       | 0% (0% to 0%)             |
| Algeria | Conflict and terrorism                          | 0 (0 to 0)       | 0 (0 to 0)       | NA                        |
| Algeria | Cyclist road injuries                           | 20 (13 to 29)    | 17 (12 to 25)    | -11.7% (-19.8% to -1.4%)  |
| Algeria | Drowning                                        | 0 (0 to 0)       | 0 (0 to 1)       | 49.8% (26.7% to 76.5%)    |
| Algeria | Environmental heat and cold exposure            | 3 (2 to 4)       | 3 (2 to 4)       | 2.8% (-1.8% to 7.8%)      |
| Algeria | Executions and police conflict                  | 0 (0 to 0)       | 0 (0 to 0)       | NA                        |
| Algeria | Exposure to forces of nature                    | 0 (0 to 0)       | 0 (0 to 0)       | NA                        |
| Algeria | Falls                                           | 82 (64 to 108)   | 97 (75 to 127)   | 18.1% (13.5% to 23.5%)    |
| Algeria | Fire, heat, and hot substances                  | 1 (1 to 2)       | 1 (0 to 1)       | -37.3% (-42.3% to -31.8%) |
| Algeria | Foreign body in eyes                            | 0 (0 to 0)       | 0 (0 to 0)       | 0.2% (0% to 0.6%)         |
| Algeria | Foreign body in other body part                 | 1 (1 to 3)       | 1 (1 to 3)       | 0.4% (-5.3% to 5.2%)      |
| Algeria | Motor vehicle road injuries                     | 70 (54 to 88)    | 46 (35 to 58)    | -34.2% (-39.6% to -28.2%) |
| Algeria | Motorcyclist road injuries                      | 12 (9 to 16)     | 8 (6 to 10)      | -37.4% (-44.1% to -29.3%) |
| Algeria | Non-venomous animal contact                     | 3 (2 to 5)       | 3 (2 to 6)       | 4.1% (-0.6% to 10.3%)     |
| Algeria | Other exposure to mechanical forces             | 28 (17 to 44)    | 24 (15 to 39)    | -13.6% (-19.1% to -7.8%)  |
| Algeria | Other road injuries                             | 2 (1 to 4)       | 2 (1 to 4)       | -2.7% (-12.9% to 10.1%)   |
| Algeria | Other transport injuries                        | 5 (4 to 7)       | 5 (4 to 7)       | 1.5% (-4.7% to 9.3%)      |
| Algeria | Other unintentional injuries                    | 19 (12 to 30)    | 16 (10 to 26)    | -17.1% (-23.4% to -11.4%) |
| Algeria | Pedestrian road injuries                        | 40 (31 to 50)    | 25 (19 to 31)    | -37.8% (-43.1% to -31.8%) |
| Algeria | Physical violence by firearm                    | 0 (0 to 0)       | 0 (0 to 1)       | 116% (93.2% to 144.1%)    |
| Algeria | Physical violence by other means                | 12 (8 to 17)     | 10 (7 to 14)     | -16.4% (-22% to -10.4%)   |
| Algeria | Physical violence by sharp object               | 2 (1 to 3)       | 1 (1 to 2)       | -25.1% (-34.5% to -15.9%) |
| Algeria | Poisoning by carbon monoxide                    | 0 (0 to 0)       | 0 (0 to 0)       | 15.6% (1.1% to 32.6%)     |
| Algeria | Poisoning by other means                        | 0 (0 to 0)       | 0 (0 to 0)       | -29.3% (-37.3% to -20.9%) |

|                |                                                 |                  |                  |                           |
|----------------|-------------------------------------------------|------------------|------------------|---------------------------|
| Algeria        | Pulmonary aspiration and foreign body in airway | 0 (0 to 1)       | 0 (0 to 1)       | -11.1% (-19.9% to -3.2%)  |
| Algeria        | Self-harm by firearm                            | 0 (0 to 0)       | 0 (0 to 0)       | 4.5% (-6% to 17.2%)       |
| Algeria        | Self-harm by other specified means              | 1 (1 to 2)       | 1 (1 to 2)       | -19.7% (-23.9% to -15%)   |
| Algeria        | Unintentional firearm injuries                  | 2 (1 to 3)       | 2 (1 to 3)       | 4.1% (-4.3% to 13.5%)     |
| Algeria        | Venomous animal contact                         | 2 (1 to 4)       | 2 (1 to 4)       | 5.7% (-0.4% to 13%)       |
| American Samoa | Adverse effects of medical treatment            | 0 (0 to 0)       | 0 (0 to 0)       | 0% (0% to 0%)             |
| American Samoa | Conflict and terrorism                          | 0 (0 to 0)       | 0 (0 to 0)       | NA                        |
| American Samoa | Cyclist road injuries                           | 7 (4 to 11)      | 7 (4 to 11)      | 4% (-3.3% to 12.2%)       |
| American Samoa | Drowning                                        | 0 (0 to 0)       | 0 (0 to 0)       | 0.4% (-8.6% to 11.4%)     |
| American Samoa | Environmental heat and cold exposure            | 1 (0 to 1)       | 0 (0 to 1)       | -20.9% (-27.9% to -14.4%) |
| American Samoa | Executions and police conflict                  | 0 (0 to 0)       | 0 (0 to 0)       | NA                        |
| American Samoa | Exposure to forces of nature                    | 0 (0 to 0)       | 0 (0 to 0)       | NA                        |
| American Samoa | Falls                                           | 32 (20 to 50)    | 40 (25 to 62)    | 24.7% (19.9% to 29.4%)    |
| American Samoa | Fire, heat, and hot substances                  | 0 (0 to 0)       | 0 (0 to 0)       | 12.1% (5.6% to 18.8%)     |
| American Samoa | Foreign body in eyes                            | 0 (0 to 0)       | 0 (0 to 0)       | -1.1% (-2.1% to -0.4%)    |
| American Samoa | Foreign body in other body part                 | 1 (0 to 2)       | 1 (0 to 2)       | -1.7% (-6.3% to 3.4%)     |
| American Samoa | Motor vehicle road injuries                     | 28 (19 to 38)    | 20 (14 to 29)    | -27.6% (-33.1% to -21.8%) |
| American Samoa | Motorcyclist road injuries                      | 20 (15 to 28)    | 19 (14 to 26)    | -7.7% (-14.6% to 0.3%)    |
| American Samoa | Non-venomous animal contact                     | 2 (1 to 4)       | 2 (1 to 4)       | 1.1% (-3.7% to 6.5%)      |
| American Samoa | Other exposure to mechanical forces             | 28 (14 to 51)    | 20 (10 to 38)    | -28.2% (-34.4% to -22.6%) |
| American Samoa | Other road injuries                             | 2 (1 to 4)       | 2 (1 to 3)       | -3.5% (-12.5% to 6.3%)    |
| American Samoa | Other transport injuries                        | 4 (3 to 6)       | 3 (2 to 5)       | -27.8% (-34.5% to -21.8%) |
| American Samoa | Other unintentional injuries                    | 3 (2 to 6)       | 3 (2 to 5)       | -18.8% (-23.7% to -14%)   |
| American Samoa | Pedestrian road injuries                        | 15 (10 to 21)    | 13 (9 to 17)     | -15.6% (-22.1% to -8.2%)  |
| American Samoa | Physical violence by firearm                    | 0 (0 to 0)       | 0 (0 to 0)       | -23.9% (-36.7% to -8.7%)  |
| American Samoa | Physical violence by other means                | 39 (26 to 57)    | 34 (23 to 51)    | -11.4% (-17% to -5.9%)    |
| American Samoa | Physical violence by sharp object               | 2 (1 to 4)       | 1 (1 to 3)       | -35.9% (-45.2% to -27.7%) |
| American Samoa | Poisoning by carbon monoxide                    | 0 (0 to 0)       | 0 (0 to 0)       | 9% (-0.4% to 19%)         |
| American Samoa | Poisoning by other means                        | 0 (0 to 0)       | 0 (0 to 0)       | -6.6% (-13.4% to 0.5%)    |
| American Samoa | Pulmonary aspiration and foreign body in airway | 0 (0 to 0)       | 0 (0 to 0)       | 13% (-0.7% to 26.9%)      |
| American Samoa | Self-harm by firearm                            | 0 (0 to 0)       | 0 (0 to 0)       | 1.2% (-8% to 10.4%)       |
| American Samoa | Self-harm by other specified means              | 0 (0 to 0)       | 0 (0 to 0)       | 21.1% (12.9% to 31.3%)    |
| American Samoa | Unintentional firearm injuries                  | 2 (1 to 4)       | 1 (0 to 2)       | -39.3% (-48.8% to -30.7%) |
| American Samoa | Venomous animal contact                         | 1 (0 to 2)       | 1 (0 to 2)       | -4.3% (-11.9% to 3.3%)    |
| Andorra        | Adverse effects of medical treatment            | 0 (0 to 0)       | 0 (0 to 0)       | 0% (0% to 0%)             |
| Andorra        | Conflict and terrorism                          | 0 (0 to 0)       | 0 (0 to 0)       | NA                        |
| Andorra        | Cyclist road injuries                           | 33 (23 to 44)    | 27 (19 to 37)    | -16.3% (-22.8% to -8.7%)  |
| Andorra        | Drowning                                        | 0 (0 to 0)       | 0 (0 to 0)       | 65.2% (48.1% to 81.3%)    |
| Andorra        | Environmental heat and cold exposure            | 2 (1 to 3)       | 2 (1 to 3)       | 0.9% (-2.9% to 4.9%)      |
| Andorra        | Executions and police conflict                  | 0 (0 to 0)       | 0 (0 to 0)       | NA                        |
| Andorra        | Exposure to forces of nature                    | 0 (0 to 0)       | 0 (0 to 0)       | NA                        |
| Andorra        | Falls                                           | 294 (235 to 368) | 318 (250 to 398) | 8% (3.3% to 12.7%)        |
| Andorra        | Fire, heat, and hot substances                  | 2 (1 to 3)       | 2 (1 to 3)       | 0.6% (-4.1% to 5.3%)      |

|         |                                                 |                 |               |                           |
|---------|-------------------------------------------------|-----------------|---------------|---------------------------|
| Andorra | Foreign body in eyes                            | 0 (0 to 0)      | 0 (0 to 0)    | -0.9% (-1.7% to -0.4%)    |
| Andorra | Foreign body in other body part                 | 2 (1 to 3)      | 2 (1 to 3)    | -1% (-5.6% to 4.1%)       |
| Andorra | Motor vehicle road injuries                     | 41 (32 to 54)   | 31 (23 to 41) | -23.7% (-29.9% to -16.7%) |
| Andorra | Motorcyclist road injuries                      | 15 (11 to 20)   | 14 (10 to 18) | -7.2% (-16.8% to 3.1%)    |
| Andorra | Non-venomous animal contact                     | 2 (1 to 3)      | 2 (1 to 3)    | -6.2% (-11.2% to -1.7%)   |
| Andorra | Other exposure to mechanical forces             | 42 (25 to 67)   | 42 (25 to 69) | 1.3% (-3.6% to 6.4%)      |
| Andorra | Other road injuries                             | 2 (1 to 3)      | 2 (1 to 3)    | -9.8% (-18.2% to -0.6%)   |
| Andorra | Other transport injuries                        | 4 (3 to 6)      | 4 (3 to 6)    | 1% (-3.5% to 5.6%)        |
| Andorra | Other unintentional injuries                    | 22 (14 to 35)   | 21 (13 to 35) | -2.4% (-6.3% to 1.3%)     |
| Andorra | Pedestrian road injuries                        | 12 (9 to 15)    | 9 (6 to 12)   | -21.7% (-29.5% to -13%)   |
| Andorra | Physical violence by firearm                    | 1 (0 to 1)      | 1 (0 to 1)    | 33.4% (20.9% to 47.2%)    |
| Andorra | Physical violence by other means                | 14 (9 to 20)    | 13 (9 to 19)  | -4.4% (-10.8% to 1.9%)    |
| Andorra | Physical violence by sharp object               | 1 (1 to 2)      | 1 (1 to 2)    | -7.4% (-16.6% to 2.1%)    |
| Andorra | Poisoning by carbon monoxide                    | 0 (0 to 0)      | 0 (0 to 0)    | 10.4% (3.5% to 18.2%)     |
| Andorra | Poisoning by other means                        | 0 (0 to 0)      | 0 (0 to 0)    | -4.5% (-9.9% to 1%)       |
| Andorra | Pulmonary aspiration and foreign body in airway | 1 (1 to 2)      | 1 (0 to 1)    | -11.5% (-19.8% to -3.4%)  |
| Andorra | Self-harm by firearm                            | 0 (0 to 0)      | 0 (0 to 0)    | -13.1% (-22.8% to -2%)    |
| Andorra | Self-harm by other specified means              | 3 (2 to 4)      | 2 (1 to 4)    | -15.3% (-19.2% to -11.6%) |
| Andorra | Unintentional firearm injuries                  | 1 (0 to 2)      | 1 (0 to 2)    | 5.6% (-2.9% to 14.1%)     |
| Andorra | Venomous animal contact                         | 1 (0 to 2)      | 1 (0 to 2)    | -7.6% (-13.5% to -1.8%)   |
| Angola  | Adverse effects of medical treatment            | 0 (0 to 0)      | 0 (0 to 0)    | 0% (0% to 0%)             |
| Angola  | Conflict and terrorism                          | 163 (66 to 372) | 0 (0 to 1)    | NA                        |
| Angola  | Cyclist road injuries                           | 17 (11 to 24)   | 21 (14 to 30) | 24.7% (14% to 36%)        |
| Angola  | Drowning                                        | 0 (0 to 0)      | 0 (0 to 0)    | -28.5% (-36.5% to -20.8%) |
| Angola  | Environmental heat and cold exposure            | 2 (2 to 3)      | 2 (1 to 3)    | -9.3% (-17.1% to -2.4%)   |
| Angola  | Executions and police conflict                  | 0 (0 to 0)      | 0 (0 to 0)    | NA                        |
| Angola  | Exposure to forces of nature                    | 0 (0 to 0)      | 0 (0 to 0)    | NA                        |
| Angola  | Falls                                           | 38 (30 to 48)   | 47 (36 to 59) | 23.9% (19.5% to 28.2%)    |
| Angola  | Fire, heat, and hot substances                  | 1 (1 to 2)      | 1 (1 to 1)    | -21.8% (-28.7% to -15.6%) |
| Angola  | Foreign body in eyes                            | 0 (0 to 0)      | 0 (0 to 0)    | -2.2% (-3.8% to -1.1%)    |
| Angola  | Foreign body in other body part                 | 4 (2 to 7)      | 3 (1 to 6)    | -17.1% (-23.2% to -11.7%) |
| Angola  | Motor vehicle road injuries                     | 44 (33 to 57)   | 47 (36 to 59) | 6.5% (-1.9% to 15.3%)     |
| Angola  | Motorcyclist road injuries                      | 10 (8 to 14)    | 11 (8 to 14)  | 4.8% (-6.4% to 16.5%)     |
| Angola  | Non-venomous animal contact                     | 8 (5 to 14)     | 6 (3 to 10)   | -33% (-38.6% to -27.4%)   |
| Angola  | Other exposure to mechanical forces             | 17 (11 to 28)   | 14 (9 to 24)  | -16.2% (-22.7% to -9.3%)  |
| Angola  | Other road injuries                             | 1 (1 to 2)      | 1 (1 to 2)    | 17.7% (6% to 31.2%)       |
| Angola  | Other transport injuries                        | 6 (5 to 8)      | 5 (4 to 6)    | -18.1% (-25.5% to -10.7%) |
| Angola  | Other unintentional injuries                    | 8 (6 to 13)     | 7 (4 to 11)   | -20.2% (-26.6% to -13.2%) |
| Angola  | Pedestrian road injuries                        | 49 (37 to 61)   | 42 (32 to 52) | -15.2% (-21.7% to -9.1%)  |
| Angola  | Physical violence by firearm                    | 0 (0 to 0)      | 0 (0 to 0)    | 21.1% (8.2% to 35.1%)     |
| Angola  | Physical violence by other means                | 5 (4 to 8)      | 5 (3 to 7)    | -7.4% (-13.2% to -1.5%)   |
| Angola  | Physical violence by sharp object               | 2 (1 to 3)      | 2 (1 to 3)    | -9.4% (-16.9% to -1.7%)   |
| Angola  | Poisoning by carbon monoxide                    | 0 (0 to 0)      | 0 (0 to 0)    | 3.1% (-9.2% to 17.6%)     |

|                     |                                                 |                 |                 |                           |
|---------------------|-------------------------------------------------|-----------------|-----------------|---------------------------|
| Angola              | Poisoning by other means                        | 0 (0 to 0)      | 0 (0 to 0)      | -32.9% (-40% to -24.6%)   |
| Angola              | Pulmonary aspiration and foreign body in airway | 0 (0 to 1)      | 0 (0 to 1)      | -39.4% (-47.4% to -30.3%) |
| Angola              | Self-harm by firearm                            | 0 (0 to 0)      | 0 (0 to 0)      | 16.9% (3.1% to 32.4%)     |
| Angola              | Self-harm by other specified means              | 1 (1 to 2)      | 1 (1 to 2)      | -5.5% (-10.4% to -0.3%)   |
| Angola              | Unintentional firearm injuries                  | 2 (1 to 3)      | 1 (1 to 2)      | -24.2% (-32.5% to -15.4%) |
| Angola              | Venomous animal contact                         | 1 (0 to 4)      | 1 (0 to 3)      | -18% (-27.1% to -7.7%)    |
| Antigua and Barbuda | Adverse effects of medical treatment            | 0 (0 to 0)      | 0 (0 to 0)      | 0% (0% to 0%)             |
| Antigua and Barbuda | Conflict and terrorism                          | 0 (0 to 0)      | 0 (0 to 0)      | NA                        |
| Antigua and Barbuda | Cyclist road injuries                           | 27 (20 to 37)   | 25 (18 to 34)   | -8.5% (-16.8% to 0.1%)    |
| Antigua and Barbuda | Drowning                                        | 0 (0 to 1)      | 0 (0 to 1)      | 16.9% (4.6% to 28.3%)     |
| Antigua and Barbuda | Environmental heat and cold exposure            | 13 (9 to 18)    | 14 (10 to 20)   | 7.6% (2.8% to 12%)        |
| Antigua and Barbuda | Executions and police conflict                  | 0 (0 to 0)      | 0 (0 to 0)      | NA                        |
| Antigua and Barbuda | Exposure to forces of nature                    | 0 (0 to 0)      | 0 (0 to 0)      | NA                        |
| Antigua and Barbuda | Falls                                           | 42 (33 to 55)   | 64 (50 to 83)   | 51.3% (45.4% to 57.4%)    |
| Antigua and Barbuda | Fire, heat, and hot substances                  | 5 (3 to 8)      | 4 (2 to 7)      | -18.3% (-23.6% to -12.7%) |
| Antigua and Barbuda | Foreign body in eyes                            | 0 (0 to 0)      | 0 (0 to 0)      | 1% (0.4% to 1.9%)         |
| Antigua and Barbuda | Foreign body in other body part                 | 1 (1 to 3)      | 1 (1 to 3)      | -0.9% (-6.8% to 5.2%)     |
| Antigua and Barbuda | Motor vehicle road injuries                     | 28 (21 to 36)   | 21 (15 to 27)   | -25.8% (-32.7% to -18.1%) |
| Antigua and Barbuda | Motorcyclist road injuries                      | 13 (9 to 17)    | 13 (10 to 18)   | 5.6% (-6.2% to 19.1%)     |
| Antigua and Barbuda | Non-venomous animal contact                     | 3 (1 to 5)      | 3 (1 to 5)      | -1.2% (-6.8% to 5.9%)     |
| Antigua and Barbuda | Other exposure to mechanical forces             | 68 (41 to 111)  | 76 (46 to 125)  | 11.7% (3.7% to 20.1%)     |
| Antigua and Barbuda | Other road injuries                             | 4 (2 to 6)      | 3 (2 to 6)      | -3.7% (-13% to 6.6%)      |
| Antigua and Barbuda | Other transport injuries                        | 4 (3 to 6)      | 4 (3 to 6)      | 2.3% (-3.5% to 8.5%)      |
| Antigua and Barbuda | Other unintentional injuries                    | 18 (11 to 29)   | 15 (10 to 24)   | -14.3% (-19.6% to -9.7%)  |
| Antigua and Barbuda | Pedestrian road injuries                        | 12 (9 to 16)    | 10 (7 to 14)    | -14.1% (-22.3% to -5.5%)  |
| Antigua and Barbuda | Physical violence by firearm                    | 1 (0 to 1)      | 1 (1 to 1)      | 86.3% (62.4% to 118.2%)   |
| Antigua and Barbuda | Physical violence by other means                | 11 (8 to 15)    | 11 (8 to 16)    | 4.7% (-3.6% to 13.7%)     |
| Antigua and Barbuda | Physical violence by sharp object               | 3 (2 to 4)      | 3 (2 to 5)      | 9.3% (-1.1% to 21.6%)     |
| Antigua and Barbuda | Poisoning by carbon monoxide                    | 0 (0 to 0)      | 0 (0 to 0)      | 6.5% (-5.9% to 20.1%)     |
| Antigua and Barbuda | Poisoning by other means                        | 0 (0 to 0)      | 0 (0 to 0)      | -17.6% (-27.1% to -8.1%)  |
| Antigua and Barbuda | Pulmonary aspiration and foreign body in airway | 0 (0 to 1)      | 0 (0 to 1)      | -19.2% (-26% to -11.8%)   |
| Antigua and Barbuda | Self-harm by firearm                            | 0 (0 to 0)      | 0 (0 to 0)      | 36.2% (20.7% to 54.9%)    |
| Antigua and Barbuda | Self-harm by other specified means              | 0 (0 to 0)      | 0 (0 to 1)      | 23.4% (14.1% to 34.5%)    |
| Antigua and Barbuda | Unintentional firearm injuries                  | 10 (7 to 15)    | 12 (7 to 18)    | 14.1% (1.4% to 29.5%)     |
| Antigua and Barbuda | Venomous animal contact                         | 4 (2 to 8)      | 4 (2 to 8)      | -1.5% (-6.8% to 4.6%)     |
| Argentina           | Adverse effects of medical treatment            | 0 (0 to 0)      | 0 (0 to 0)      | 0% (0% to 0%)             |
| Argentina           | Conflict and terrorism                          | 3 (1 to 6)      | 0 (0 to 0)      | NA                        |
| Argentina           | Cyclist road injuries                           | 25 (18 to 33)   | 24 (17 to 33)   | -1.7% (-11.4% to 10.1%)   |
| Argentina           | Drowning                                        | 0 (0 to 0)      | 0 (0 to 0)      | 23.5% (7.5% to 38.4%)     |
| Argentina           | Environmental heat and cold exposure            | 2 (1 to 2)      | 2 (1 to 2)      | 1.4% (-4% to 7.8%)        |
| Argentina           | Executions and police conflict                  | 0 (0 to 0)      | 0 (0 to 0)      | NA                        |
| Argentina           | Exposure to forces of nature                    | 0 (0 to 0)      | 0 (0 to 0)      | NA                        |
| Argentina           | Falls                                           | 124 (95 to 162) | 129 (97 to 171) | 3.9% (-1.5% to 8.8%)      |

|           |                                                 |                  |                 |                           |
|-----------|-------------------------------------------------|------------------|-----------------|---------------------------|
| Argentina | Fire, heat, and hot substances                  | 4 (2 to 6)       | 4 (2 to 6)      | -2% (-8.1% to 4.2%)       |
| Argentina | Foreign body in eyes                            | 0 (0 to 0)       | 0 (0 to 0)      | 0% (0% to 0.1%)           |
| Argentina | Foreign body in other body part                 | 3 (1 to 5)       | 2 (1 to 5)      | -7.5% (-12.4% to -2.2%)   |
| Argentina | Motor vehicle road injuries                     | 36 (28 to 45)    | 42 (33 to 53)   | 17.2% (6.6% to 31.4%)     |
| Argentina | Motorcyclist road injuries                      | 6 (4 to 8)       | 12 (9 to 16)    | 99.1% (69.9% to 141.2%)   |
| Argentina | Non-venomous animal contact                     | 6 (3 to 10)      | 5 (3 to 8)      | -17.8% (-21.6% to -14.1%) |
| Argentina | Other exposure to mechanical forces             | 88 (54 to 138)   | 86 (53 to 135)  | -1.7% (-8.2% to 5.2%)     |
| Argentina | Other road injuries                             | 1 (1 to 2)       | 1 (1 to 2)      | 1% (-9% to 12%)           |
| Argentina | Other transport injuries                        | 5 (4 to 6)       | 4 (3 to 5)      | -25.5% (-31.5% to -19.3%) |
| Argentina | Other unintentional injuries                    | 39 (25 to 61)    | 34 (22 to 54)   | -13% (-18.3% to -6.6%)    |
| Argentina | Pedestrian road injuries                        | 11 (8 to 14)     | 9 (7 to 13)     | -14.8% (-23.2% to -5.3%)  |
| Argentina | Physical violence by firearm                    | 1 (1 to 1)       | 2 (1 to 3)      | 74.8% (49.4% to 106.4%)   |
| Argentina | Physical violence by other means                | 32 (23 to 45)    | 36 (25 to 51)   | 11.3% (-1.2% to 24.6%)    |
| Argentina | Physical violence by sharp object               | 6 (4 to 9)       | 7 (4 to 10)     | 14.4% (-2.1% to 33.9%)    |
| Argentina | Poisoning by carbon monoxide                    | 0 (0 to 0)       | 0 (0 to 0)      | 41.4% (28.1% to 57.7%)    |
| Argentina | Poisoning by other means                        | 0 (0 to 1)       | 0 (0 to 1)      | -6.2% (-13.7% to 2%)      |
| Argentina | Pulmonary aspiration and foreign body in airway | 1 (0 to 1)       | 0 (0 to 1)      | -43.4% (-50.6% to -36%)   |
| Argentina | Self-harm by firearm                            | 1 (0 to 1)       | 1 (0 to 1)      | 15.9% (-0.7% to 33%)      |
| Argentina | Self-harm by other specified means              | 1 (1 to 2)       | 2 (2 to 4)      | 68.4% (56% to 81.9%)      |
| Argentina | Unintentional firearm injuries                  | 7 (4 to 11)      | 4 (3 to 7)      | -38.3% (-47% to -29.8%)   |
| Argentina | Venomous animal contact                         | 4 (2 to 7)       | 3 (1 to 6)      | -18.2% (-22.4% to -13.7%) |
| Armenia   | Adverse effects of medical treatment            | 0 (0 to 0)       | 0 (0 to 0)      | 0% (0% to 0%)             |
| Armenia   | Conflict and terrorism                          | 4 (2 to 10)      | 0 (0 to 0)      | NA                        |
| Armenia   | Cyclist road injuries                           | 24 (16 to 33)    | 20 (14 to 27)   | -17% (-25.4% to -7.4%)    |
| Armenia   | Drowning                                        | 1 (0 to 1)       | 1 (0 to 1)      | 5.1% (-9.6% to 19.6%)     |
| Armenia   | Environmental heat and cold exposure            | 5 (3 to 7)       | 5 (3 to 6)      | 0.1% (-7.4% to 9.6%)      |
| Armenia   | Executions and police conflict                  | 0 (0 to 0)       | 0 (0 to 0)      | NA                        |
| Armenia   | Exposure to forces of nature                    | 0 (0 to 0)       | 0 (0 to 0)      | NA                        |
| Armenia   | Falls                                           | 182 (142 to 235) | 118 (88 to 158) | -35.1% (-41.2% to -28.4%) |
| Armenia   | Fire, heat, and hot substances                  | 6 (4 to 10)      | 4 (2 to 6)      | -37% (-47.3% to -27.4%)   |
| Armenia   | Foreign body in eyes                            | 0 (0 to 0)       | 0 (0 to 0)      | 0.8% (0.4% to 1.4%)       |
| Armenia   | Foreign body in other body part                 | 2 (1 to 5)       | 2 (1 to 4)      | -14.9% (-20% to -9.9%)    |
| Armenia   | Motor vehicle road injuries                     | 57 (44 to 71)    | 47 (36 to 60)   | -16.4% (-25.4% to -6.5%)  |
| Armenia   | Motorcyclist road injuries                      | 10 (7 to 13)     | 6 (4 to 8)      | -41.3% (-51.2% to -30.8%) |
| Armenia   | Non-venomous animal contact                     | 3 (1 to 5)       | 3 (1 to 5)      | -3.3% (-9.4% to 3.1%)     |
| Armenia   | Other exposure to mechanical forces             | 81 (51 to 126)   | 58 (36 to 92)   | -28.3% (-36.3% to -20.6%) |
| Armenia   | Other road injuries                             | 3 (1 to 4)       | 2 (1 to 3)      | -21.5% (-30.9% to -11.2%) |
| Armenia   | Other transport injuries                        | 4 (3 to 6)       | 5 (3 to 7)      | 9% (4.4% to 14.3%)        |
| Armenia   | Other unintentional injuries                    | 35 (23 to 56)    | 25 (16 to 40)   | -30.7% (-37% to -23.1%)   |
| Armenia   | Pedestrian road injuries                        | 29 (22 to 36)    | 19 (14 to 25)   | -32.8% (-39.7% to -24.7%) |
| Armenia   | Physical violence by firearm                    | 0 (0 to 0)       | 0 (0 to 0)      | 50% (28.9% to 74.1%)      |
| Armenia   | Physical violence by other means                | 23 (16 to 31)    | 19 (13 to 26)   | -17.4% (-26.4% to -6.9%)  |
| Armenia   | Physical violence by sharp object               | 2 (2 to 4)       | 2 (1 to 4)      | -12.5% (-26.4% to 1.1%)   |



|           |                                                 |                  |                  |                           |
|-----------|-------------------------------------------------|------------------|------------------|---------------------------|
| Armenia   | Poisoning by carbon monoxide                    | 0 (0 to 0)       | 0 (0 to 0)       | -11.8% (-26.8% to 3.3%)   |
| Armenia   | Poisoning by other means                        | 0 (0 to 1)       | 0 (0 to 1)       | -17% (-27.7% to -6.9%)    |
| Armenia   | Pulmonary aspiration and foreign body in airway | 2 (1 to 3)       | 1 (1 to 2)       | -33.1% (-41% to -26.4%)   |
| Armenia   | Self-harm by firearm                            | 0 (0 to 0)       | 0 (0 to 0)       | 128.4% (99.4% to 160.5%)  |
| Armenia   | Self-harm by other specified means              | 1 (1 to 1)       | 2 (1 to 3)       | 98.7% (84.4% to 115.3%)   |
| Armenia   | Unintentional firearm injuries                  | 2 (1 to 3)       | 1 (1 to 2)       | -49.3% (-57.3% to -39.5%) |
| Armenia   | Venomous animal contact                         | 3 (1 to 6)       | 3 (1 to 5)       | -15.9% (-21.6% to -10.8%) |
| Australia | Adverse effects of medical treatment            | 0 (0 to 0)       | 0 (0 to 0)       | 0% (0% to 0%)             |
| Australia | Conflict and terrorism                          | 0 (0 to 0)       | 0 (0 to 0)       | NA                        |
| Australia | Cyclist road injuries                           | 10 (6 to 14)     | 8 (5 to 11)      | -18.9% (-30.1% to -5.9%)  |
| Australia | Drowning                                        | 0 (0 to 0)       | 0 (0 to 0)       | 35.9% (22.9% to 51.8%)    |
| Australia | Environmental heat and cold exposure            | 3 (2 to 4)       | 2 (2 to 3)       | -15.2% (-21.3% to -10.3%) |
| Australia | Executions and police conflict                  | 0 (0 to 0)       | 0 (0 to 0)       | NA                        |
| Australia | Exposure to forces of nature                    | 0 (0 to 0)       | 0 (0 to 0)       | NA                        |
| Australia | Falls                                           | 259 (198 to 346) | 338 (262 to 442) | 30.4% (24.4% to 37.1%)    |
| Australia | Fire, heat, and hot substances                  | 3 (2 to 6)       | 3 (2 to 6)       | -4.5% (-10.2% to 1.1%)    |
| Australia | Foreign body in eyes                            | 0 (0 to 0)       | 0 (0 to 0)       | 0.2% (-0.1% to 0.7%)      |
| Australia | Foreign body in other body part                 | 5 (3 to 11)      | 5 (3 to 11)      | 0.8% (-4.1% to 6.9%)      |
| Australia | Motor vehicle road injuries                     | 51 (40 to 64)    | 32 (25 to 40)    | -37.7% (-45.2% to -29.7%) |
| Australia | Motorcyclist road injuries                      | 14 (10 to 18)    | 12 (9 to 15)     | -15.6% (-31.1% to 0.7%)   |
| Australia | Non-venomous animal contact                     | 13 (7 to 23)     | 12 (6 to 20)     | -13% (-16.8% to -8.8%)    |
| Australia | Other exposure to mechanical forces             | 191 (117 to 304) | 177 (106 to 286) | -7.1% (-14.5% to -0.9%)   |
| Australia | Other road injuries                             | 1 (0 to 1)       | 1 (0 to 1)       | -4.4% (-16.4% to 9.5%)    |
| Australia | Other transport injuries                        | 7 (5 to 9)       | 6 (4 to 8)       | -14.1% (-20.6% to -7.6%)  |
| Australia | Other unintentional injuries                    | 61 (39 to 96)    | 54 (35 to 86)    | -11.4% (-17.3% to -6.6%)  |
| Australia | Pedestrian road injuries                        | 13 (10 to 16)    | 8 (6 to 11)      | -34.9% (-43.9% to -24.7%) |
| Australia | Physical violence by firearm                    | 1 (0 to 1)       | 1 (0 to 1)       | 27.2% (14.9% to 42.9%)    |
| Australia | Physical violence by other means                | 45 (32 to 64)    | 42 (29 to 59)    | -7.3% (-14.3% to 0.1%)    |
| Australia | Physical violence by sharp object               | 3 (2 to 5)       | 3 (1 to 4)       | -18.5% (-27.2% to -9.3%)  |
| Australia | Poisoning by carbon monoxide                    | 0 (0 to 0)       | 0 (0 to 0)       | 7.1% (-1.6% to 15.1%)     |
| Australia | Poisoning by other means                        | 0 (0 to 0)       | 0 (0 to 0)       | -2.1% (-9.1% to 3.9%)     |
| Australia | Pulmonary aspiration and foreign body in airway | 1 (1 to 2)       | 1 (1 to 2)       | -8.4% (-12.8% to -3.3%)   |
| Australia | Self-harm by firearm                            | 0 (0 to 1)       | 0 (0 to 0)       | -52.3% (-61.9% to -41.3%) |
| Australia | Self-harm by other specified means              | 4 (2 to 6)       | 4 (2 to 6)       | 0.1% (-5.7% to 6.4%)      |
| Australia | Unintentional firearm injuries                  | 1 (1 to 2)       | 1 (0 to 2)       | -9.3% (-20.3% to 2.8%)    |
| Australia | Venomous animal contact                         | 3 (1 to 7)       | 3 (1 to 6)       | -15.3% (-20.2% to -10.2%) |
| Austria   | Adverse effects of medical treatment            | 0 (0 to 0)       | 0 (0 to 0)       | 0% (0% to 0%)             |
| Austria   | Conflict and terrorism                          | 0 (0 to 0)       | 0 (0 to 0)       | NA                        |
| Austria   | Cyclist road injuries                           | 26 (19 to 35)    | 19 (13 to 25)    | -29.7% (-39.1% to -18.8%) |
| Austria   | Drowning                                        | 0 (0 to 0)       | 0 (0 to 0)       | 38.9% (21.9% to 54.8%)    |
| Austria   | Environmental heat and cold exposure            | 2 (1 to 3)       | 2 (1 to 3)       | 3.5% (-1.9% to 9.3%)      |
| Austria   | Executions and police conflict                  | 0 (0 to 0)       | 0 (0 to 0)       | NA                        |
| Austria   | Exposure to forces of nature                    | 0 (0 to 0)       | 0 (0 to 0)       | NA                        |

|            |                                                 |                  |                  |                           |
|------------|-------------------------------------------------|------------------|------------------|---------------------------|
| Austria    | Falls                                           | 312 (247 to 397) | 300 (236 to 379) | -3.8% (-8.6% to 1%)       |
| Austria    | Fire, heat, and hot substances                  | 2 (1 to 4)       | 2 (1 to 4)       | -4.2% (-9.3% to 1.6%)     |
| Austria    | Foreign body in eyes                            | 0 (0 to 0)       | 0 (0 to 0)       | 0.9% (0.2% to 1.9%)       |
| Austria    | Foreign body in other body part                 | 2 (1 to 3)       | 2 (1 to 3)       | 1.6% (-2.6% to 6.7%)      |
| Austria    | Motor vehicle road injuries                     | 44 (34 to 57)    | 19 (14 to 25)    | -56.4% (-63.2% to -48.7%) |
| Austria    | Motorcyclist road injuries                      | 14 (10 to 18)    | 10 (7 to 13)     | -30% (-42.5% to -15.6%)   |
| Austria    | Non-venomous animal contact                     | 2 (1 to 4)       | 2 (1 to 4)       | -12.9% (-17.8% to -7.3%)  |
| Austria    | Other exposure to mechanical forces             | 66 (42 to 104)   | 46 (28 to 74)    | -30.2% (-38.2% to -23%)   |
| Austria    | Other road injuries                             | 1 (1 to 2)       | 1 (1 to 2)       | -17.3% (-29.2% to -3.7%)  |
| Austria    | Other transport injuries                        | 5 (4 to 7)       | 5 (4 to 7)       | -7% (-12.6% to -0.7%)     |
| Austria    | Other unintentional injuries                    | 23 (14 to 36)    | 22 (14 to 35)    | -4.2% (-9.9% to 0.6%)     |
| Austria    | Pedestrian road injuries                        | 12 (10 to 16)    | 6 (4 to 8)       | -50.7% (-58.1% to -41.7%) |
| Austria    | Physical violence by firearm                    | 0 (0 to 1)       | 1 (0 to 1)       | 36.2% (23.6% to 49.8%)    |
| Austria    | Physical violence by other means                | 14 (10 to 20)    | 14 (10 to 21)    | 1.5% (-4.8% to 7.2%)      |
| Austria    | Physical violence by sharp object               | 2 (1 to 3)       | 1 (1 to 2)       | -17.4% (-25.4% to -9%)    |
| Austria    | Poisoning by carbon monoxide                    | 0 (0 to 0)       | 0 (0 to 0)       | 14.4% (6.2% to 23.5%)     |
| Austria    | Poisoning by other means                        | 0 (0 to 0)       | 0 (0 to 0)       | -3.8% (-9.3% to 1.9%)     |
| Austria    | Pulmonary aspiration and foreign body in airway | 1 (1 to 2)       | 1 (0 to 1)       | -7.3% (-15.5% to 1.7%)    |
| Austria    | Self-harm by firearm                            | 1 (0 to 1)       | 1 (0 to 1)       | -35.2% (-44.2% to -25.3%) |
| Austria    | Self-harm by other specified means              | 4 (3 to 7)       | 3 (2 to 5)       | -32.4% (-36.3% to -28%)   |
| Austria    | Unintentional firearm injuries                  | 1 (1 to 2)       | 1 (1 to 2)       | 5.8% (-5.7% to 17.4%)     |
| Austria    | Venomous animal contact                         | 1 (0 to 2)       | 1 (0 to 2)       | -12.5% (-17.8% to -6.2%)  |
| Azerbaijan | Adverse effects of medical treatment            | 0 (0 to 0)       | 0 (0 to 0)       | 0% (0% to 0%)             |
| Azerbaijan | Conflict and terrorism                          | 2 (1 to 6)       | 0 (0 to 0)       | NA                        |
| Azerbaijan | Cyclist road injuries                           | 20 (14 to 28)    | 18 (12 to 26)    | -9.7% (-19% to 0.7%)      |
| Azerbaijan | Drowning                                        | 1 (0 to 1)       | 1 (0 to 1)       | 17.5% (3.9% to 34%)       |
| Azerbaijan | Environmental heat and cold exposure            | 5 (3 to 7)       | 4 (3 to 6)       | -8.3% (-14.1% to -1.7%)   |
| Azerbaijan | Executions and police conflict                  | 0 (0 to 0)       | 0 (0 to 0)       | NA                        |
| Azerbaijan | Exposure to forces of nature                    | 0 (0 to 0)       | 0 (0 to 0)       | NA                        |
| Azerbaijan | Falls                                           | 106 (80 to 142)  | 113 (85 to 153)  | 7% (0.8% to 13.1%)        |
| Azerbaijan | Fire, heat, and hot substances                  | 6 (4 to 10)      | 5 (3 to 8)       | -21.7% (-27.9% to -15.1%) |
| Azerbaijan | Foreign body in eyes                            | 0 (0 to 0)       | 0 (0 to 0)       | 2.5% (1.6% to 3.7%)       |
| Azerbaijan | Foreign body in other body part                 | 2 (1 to 4)       | 2 (1 to 4)       | 1.2% (-4.6% to 7.7%)      |
| Azerbaijan | Motor vehicle road injuries                     | 60 (47 to 77)    | 46 (35 to 58)    | -24.7% (-32.7% to -16.5%) |
| Azerbaijan | Motorcyclist road injuries                      | 6 (4 to 8)       | 3 (2 to 4)       | -46.5% (-54% to -38%)     |
| Azerbaijan | Non-venomous animal contact                     | 2 (1 to 4)       | 2 (1 to 4)       | -10% (-14.8% to -4.3%)    |
| Azerbaijan | Other exposure to mechanical forces             | 55 (34 to 87)    | 55 (34 to 86)    | -0.6% (-6.6% to 6.2%)     |
| Azerbaijan | Other road injuries                             | 2 (1 to 3)       | 2 (1 to 3)       | -1.3% (-12.4% to 11%)     |
| Azerbaijan | Other transport injuries                        | 4 (3 to 6)       | 5 (4 to 7)       | 13.5% (7.8% to 20.2%)     |
| Azerbaijan | Other unintentional injuries                    | 20 (13 to 33)    | 21 (13 to 33)    | 1.7% (-3.9% to 6.8%)      |
| Azerbaijan | Pedestrian road injuries                        | 27 (20 to 35)    | 21 (16 to 27)    | -19.8% (-28.2% to -10.6%) |
| Azerbaijan | Physical violence by firearm                    | 0 (0 to 0)       | 0 (0 to 0)       | -18.1% (-36.7% to 3.6%)   |
| Azerbaijan | Physical violence by other means                | 38 (27 to 53)    | 17 (12 to 24)    | -55.7% (-61.8% to -48.3%) |



|            |                                                 |               |               |                           |
|------------|-------------------------------------------------|---------------|---------------|---------------------------|
| Azerbaijan | Physical violence by sharp object               | 3 (2 to 5)    | 2 (1 to 3)    | -49.7% (-58.5% to -39.3%) |
| Azerbaijan | Poisoning by carbon monoxide                    | 0 (0 to 0)    | 0 (0 to 0)    | 16.7% (3.4% to 30.5%)     |
| Azerbaijan | Poisoning by other means                        | 0 (0 to 1)    | 0 (0 to 1)    | -8.8% (-18.3% to -0.2%)   |
| Azerbaijan | Pulmonary aspiration and foreign body in airway | 1 (1 to 2)    | 1 (1 to 2)    | -12.4% (-19.5% to -4.9%)  |
| Azerbaijan | Self-harm by firearm                            | 0 (0 to 0)    | 0 (0 to 0)    | 34.2% (19.2% to 51.4%)    |
| Azerbaijan | Self-harm by other specified means              | 1 (1 to 1)    | 1 (1 to 2)    | 27.3% (20% to 35.3%)      |
| Azerbaijan | Unintentional firearm injuries                  | 1 (1 to 2)    | 1 (1 to 2)    | 1.9% (-6.7% to 11.2%)     |
| Azerbaijan | Venomous animal contact                         | 3 (1 to 5)    | 2 (1 to 4)    | -9.6% (-14.2% to -4.3%)   |
| Bahamas    | Adverse effects of medical treatment            | 0 (0 to 0)    | 0 (0 to 0)    | 0% (0% to 0%)             |
| Bahamas    | Conflict and terrorism                          | 0 (0 to 0)    | 0 (0 to 0)    | NA                        |
| Bahamas    | Cyclist road injuries                           | 34 (24 to 45) | 26 (18 to 35) | -23.4% (-31.8% to -14.3%) |
| Bahamas    | Drowning                                        | 0 (0 to 1)    | 0 (0 to 1)    | 13.6% (2.7% to 24.9%)     |
| Bahamas    | Environmental heat and cold exposure            | 11 (8 to 15)  | 11 (8 to 15)  | 1.1% (-3.7% to 5.4%)      |
| Bahamas    | Executions and police conflict                  | 0 (0 to 0)    | 0 (0 to 0)    | NA                        |
| Bahamas    | Exposure to forces of nature                    | 0 (0 to 0)    | 0 (0 to 0)    | NA                        |
| Bahamas    | Falls                                           | 51 (40 to 65) | 70 (55 to 90) | 38.9% (33.4% to 44.7%)    |
| Bahamas    | Fire, heat, and hot substances                  | 5 (3 to 9)    | 5 (3 to 8)    | -16.1% (-21.6% to -9.9%)  |
| Bahamas    | Foreign body in eyes                            | 0 (0 to 0)    | 0 (0 to 0)    | 0.3% (0% to 0.7%)         |
| Bahamas    | Foreign body in other body part                 | 1 (1 to 3)    | 1 (1 to 3)    | -4.2% (-10% to 2.3%)      |
| Bahamas    | Motor vehicle road injuries                     | 45 (34 to 58) | 34 (25 to 43) | -25.5% (-33.6% to -16.4%) |
| Bahamas    | Motorcyclist road injuries                      | 22 (17 to 29) | 25 (19 to 31) | 13.4% (-0.3% to 29.2%)    |
| Bahamas    | Non-venomous animal contact                     | 2 (1 to 4)    | 2 (1 to 4)    | 1.1% (-4.8% to 7.8%)      |
| Bahamas    | Other exposure to mechanical forces             | 28 (16 to 46) | 33 (19 to 55) | 17.8% (12% to 24.3%)      |
| Bahamas    | Other road injuries                             | 5 (3 to 8)    | 4 (2 to 6)    | -18.4% (-27.5% to -8.3%)  |
| Bahamas    | Other transport injuries                        | 6 (5 to 8)    | 7 (6 to 9)    | 16.3% (8.8% to 24.8%)     |
| Bahamas    | Other unintentional injuries                    | 12 (8 to 20)  | 12 (7 to 20)  | -5% (-10.6% to 0.4%)      |
| Bahamas    | Pedestrian road injuries                        | 22 (17 to 28) | 15 (11 to 19) | -34.3% (-40.9% to -27.3%) |
| Bahamas    | Physical violence by firearm                    | 2 (1 to 3)    | 7 (5 to 9)    | 204.5% (155.3% to 261.8%) |
| Bahamas    | Physical violence by other means                | 15 (11 to 23) | 20 (14 to 30) | 30.7% (17.6% to 43.9%)    |
| Bahamas    | Physical violence by sharp object               | 6 (4 to 9)    | 9 (5 to 14)   | 46.1% (26.8% to 67%)      |
| Bahamas    | Poisoning by carbon monoxide                    | 0 (0 to 0)    | 0 (0 to 0)    | 9.8% (-1.4% to 22.1%)     |
| Bahamas    | Poisoning by other means                        | 0 (0 to 0)    | 0 (0 to 0)    | -5% (-13.6% to 3.9%)      |
| Bahamas    | Pulmonary aspiration and foreign body in airway | 1 (0 to 1)    | 0 (0 to 1)    | -25% (-32% to -17%)       |
| Bahamas    | Self-harm by firearm                            | 0 (0 to 0)    | 0 (0 to 0)    | -0.5% (-10.3% to 9%)      |
| Bahamas    | Self-harm by other specified means              | 0 (0 to 0)    | 0 (0 to 0)    | 9.5% (2.6% to 17.5%)      |
| Bahamas    | Unintentional firearm injuries                  | 3 (2 to 6)    | 4 (2 to 7)    | 18.7% (10.6% to 27.8%)    |
| Bahamas    | Venomous animal contact                         | 4 (2 to 7)    | 4 (2 to 7)    | 1.1% (-4.5% to 7.3%)      |
| Bahrain    | Adverse effects of medical treatment            | 0 (0 to 0)    | 0 (0 to 0)    | 0% (0% to 0%)             |
| Bahrain    | Conflict and terrorism                          | 0 (0 to 0)    | 0 (0 to 0)    | NA                        |
| Bahrain    | Cyclist road injuries                           | 19 (13 to 27) | 17 (12 to 24) | -9.9% (-18.7% to 0.6%)    |
| Bahrain    | Drowning                                        | 0 (0 to 0)    | 0 (0 to 1)    | 88.9% (56.3% to 122%)     |
| Bahrain    | Environmental heat and cold exposure            | 4 (3 to 6)    | 4 (3 to 6)    | 2.9% (-2.7% to 8.1%)      |
| Bahrain    | Executions and police conflict                  | 0 (0 to 0)    | 0 (0 to 0)    | NA                        |

|            |                                                 |                |                |                           |
|------------|-------------------------------------------------|----------------|----------------|---------------------------|
| Bahrain    | Exposure to forces of nature                    | 0 (0 to 0)     | 0 (0 to 0)     | NA                        |
| Bahrain    | Falls                                           | 67 (52 to 88)  | 95 (72 to 126) | 41.5% (35.3% to 47.7%)    |
| Bahrain    | Fire, heat, and hot substances                  | 1 (0 to 1)     | 1 (0 to 1)     | -1.6% (-8% to 4.6%)       |
| Bahrain    | Foreign body in eyes                            | 0 (0 to 0)     | 0 (0 to 0)     | 1.2% (0.4% to 2.7%)       |
| Bahrain    | Foreign body in other body part                 | 1 (1 to 3)     | 1 (1 to 3)     | 1.8% (-2.8% to 6.4%)      |
| Bahrain    | Motor vehicle road injuries                     | 66 (52 to 82)  | 39 (30 to 50)  | -41.4% (-47.2% to -34.9%) |
| Bahrain    | Motorcyclist road injuries                      | 10 (7 to 13)   | 10 (7 to 13)   | 0.2% (-10.8% to 12%)      |
| Bahrain    | Non-venomous animal contact                     | 3 (1 to 5)     | 3 (1 to 5)     | 2.6% (-2.8% to 7.4%)      |
| Bahrain    | Other exposure to mechanical forces             | 24 (14 to 39)  | 26 (15 to 42)  | 9.6% (3.5% to 15.6%)      |
| Bahrain    | Other road injuries                             | 3 (1 to 4)     | 2 (1 to 4)     | -9% (-19.2% to 3.5%)      |
| Bahrain    | Other transport injuries                        | 5 (4 to 7)     | 6 (4 to 8)     | 6.6% (-0.4% to 13.8%)     |
| Bahrain    | Other unintentional injuries                    | 19 (12 to 30)  | 19 (12 to 31)  | 0.2% (-5% to 5.6%)        |
| Bahrain    | Pedestrian road injuries                        | 18 (14 to 24)  | 15 (11 to 20)  | -18% (-25.8% to -9.6%)    |
| Bahrain    | Physical violence by firearm                    | 0 (0 to 0)     | 1 (0 to 1)     | 146.3% (120.9% to 177.6%) |
| Bahrain    | Physical violence by other means                | 15 (10 to 20)  | 14 (10 to 19)  | -6.3% (-11.6% to -1.3%)   |
| Bahrain    | Physical violence by sharp object               | 2 (1 to 3)     | 2 (1 to 3)     | -3.9% (-11.6% to 4.8%)    |
| Bahrain    | Poisoning by carbon monoxide                    | 0 (0 to 0)     | 0 (0 to 0)     | 42.3% (29.8% to 57.8%)    |
| Bahrain    | Poisoning by other means                        | 0 (0 to 0)     | 0 (0 to 0)     | -6.1% (-13.1% to 1.8%)    |
| Bahrain    | Pulmonary aspiration and foreign body in airway | 0 (0 to 1)     | 0 (0 to 1)     | -11.2% (-20.4% to -2.9%)  |
| Bahrain    | Self-harm by firearm                            | 0 (0 to 0)     | 0 (0 to 0)     | 13.6% (0% to 29.4%)       |
| Bahrain    | Self-harm by other specified means              | 1 (1 to 2)     | 1 (1 to 2)     | 32.3% (24.4% to 41.5%)    |
| Bahrain    | Unintentional firearm injuries                  | 2 (1 to 3)     | 2 (1 to 3)     | 10% (1% to 20.5%)         |
| Bahrain    | Venomous animal contact                         | 2 (1 to 3)     | 2 (1 to 3)     | 4% (-2.3% to 11%)         |
| Bangladesh | Adverse effects of medical treatment            | 0 (0 to 0)     | 0 (0 to 0)     | 0% (0% to 0%)             |
| Bangladesh | Conflict and terrorism                          | 1 (0 to 2)     | 1 (0 to 1)     | NA                        |
| Bangladesh | Cyclist road injuries                           | 90 (69 to 116) | 88 (66 to 113) | -2.2% (-8.9% to 5.6%)     |
| Bangladesh | Drowning                                        | 0 (0 to 1)     | 0 (0 to 1)     | -8.9% (-19.5% to 2.9%)    |
| Bangladesh | Environmental heat and cold exposure            | 2 (2 to 3)     | 3 (2 to 4)     | 7.5% (2.2% to 13.9%)      |
| Bangladesh | Executions and police conflict                  | 0 (0 to 0)     | 0 (0 to 0)     | NA                        |
| Bangladesh | Exposure to forces of nature                    | 2 (1 to 5)     | 0 (0 to 0)     | NA                        |
| Bangladesh | Falls                                           | 33 (24 to 45)  | 53 (40 to 71)  | 62.9% (55.3% to 71.2%)    |
| Bangladesh | Fire, heat, and hot substances                  | 1 (0 to 1)     | 0 (0 to 1)     | -7.2% (-18.1% to 2.6%)    |
| Bangladesh | Foreign body in eyes                            | 0 (0 to 0)     | 0 (0 to 0)     | -1.9% (-3.3% to -0.9%)    |
| Bangladesh | Foreign body in other body part                 | 1 (1 to 3)     | 1 (1 to 2)     | -15% (-20.8% to -8.3%)    |
| Bangladesh | Motor vehicle road injuries                     | 25 (18 to 34)  | 29 (21 to 38)  | 14.7% (4.9% to 25.2%)     |
| Bangladesh | Motorcyclist road injuries                      | 28 (21 to 37)  | 35 (27 to 45)  | 22.7% (12.8% to 33.5%)    |
| Bangladesh | Non-venomous animal contact                     | 9 (5 to 16)    | 9 (5 to 17)    | -0.1% (-6.7% to 6.5%)     |
| Bangladesh | Other exposure to mechanical forces             | 8 (5 to 14)    | 11 (6 to 18)   | 27.5% (19.6% to 34.6%)    |
| Bangladesh | Other road injuries                             | 2 (1 to 4)     | 3 (2 to 5)     | 10.5% (0.9% to 21.3%)     |
| Bangladesh | Other transport injuries                        | 7 (5 to 9)     | 7 (5 to 9)     | 1.6% (-4.6% to 7.3%)      |
| Bangladesh | Other unintentional injuries                    | 11 (7 to 18)   | 11 (7 to 18)   | 3.6% (-2.9% to 9.4%)      |
| Bangladesh | Pedestrian road injuries                        | 31 (23 to 39)  | 32 (24 to 43)  | 6.3% (-2.1% to 15%)       |
| Bangladesh | Physical violence by firearm                    | 0 (0 to 0)     | 0 (0 to 0)     | 47.5% (24% to 73.2%)      |

|            |                                                 |               |               |                           |
|------------|-------------------------------------------------|---------------|---------------|---------------------------|
| Bangladesh | Physical violence by other means                | 18 (13 to 25) | 17 (13 to 25) | -1.5% (-7.7% to 4.7%)     |
| Bangladesh | Physical violence by sharp object               | 1 (0 to 1)    | 1 (0 to 1)    | -7.7% (-16.3% to 2.1%)    |
| Bangladesh | Poisoning by carbon monoxide                    | 0 (0 to 0)    | 0 (0 to 0)    | 16.6% (3% to 32.7%)       |
| Bangladesh | Poisoning by other means                        | 0 (0 to 0)    | 0 (0 to 0)    | -10.2% (-17.3% to -3%)    |
| Bangladesh | Pulmonary aspiration and foreign body in airway | 1 (0 to 1)    | 0 (0 to 1)    | -38.4% (-46.9% to -28.7%) |
| Bangladesh | Self-harm by firearm                            | 0 (0 to 0)    | 0 (0 to 0)    | -12.5% (-24.6% to 1.3%)   |
| Bangladesh | Self-harm by other specified means              | 2 (1 to 3)    | 1 (1 to 2)    | -38.4% (-43.7% to -33.4%) |
| Bangladesh | Unintentional firearm injuries                  | 1 (0 to 1)    | 1 (0 to 1)    | 2.2% (-8.7% to 12.1%)     |
| Bangladesh | Venomous animal contact                         | 4 (2 to 9)    | 5 (2 to 10)   | 4.5% (-3.7% to 13.7%)     |
| Barbados   | Adverse effects of medical treatment            | 0 (0 to 0)    | 0 (0 to 0)    | 0% (0% to 0%)             |
| Barbados   | Conflict and terrorism                          | 0 (0 to 0)    | 0 (0 to 0)    | NA                        |
| Barbados   | Cyclist road injuries                           | 29 (21 to 40) | 26 (18 to 35) | -11.8% (-20.7% to -2.2%)  |
| Barbados   | Drowning                                        | 0 (0 to 1)    | 0 (0 to 1)    | 20% (6.4% to 34.3%)       |
| Barbados   | Environmental heat and cold exposure            | 11 (8 to 15)  | 12 (8 to 16)  | 6.1% (0.9% to 11.2%)      |
| Barbados   | Executions and police conflict                  | 0 (0 to 0)    | 0 (0 to 0)    | NA                        |
| Barbados   | Exposure to forces of nature                    | 0 (0 to 0)    | 0 (0 to 0)    | NA                        |
| Barbados   | Falls                                           | 44 (34 to 57) | 66 (51 to 85) | 48.3% (42.6% to 54.1%)    |
| Barbados   | Fire, heat, and hot substances                  | 4 (2 to 7)    | 4 (2 to 6)    | -8% (-14.3% to -1.2%)     |
| Barbados   | Foreign body in eyes                            | 0 (0 to 0)    | 0 (0 to 0)    | 0.8% (0.3% to 1.5%)       |
| Barbados   | Foreign body in other body part                 | 1 (1 to 3)    | 1 (1 to 3)    | -1.6% (-6.6% to 3.1%)     |
| Barbados   | Motor vehicle road injuries                     | 36 (26 to 46) | 28 (21 to 35) | -22.4% (-30.1% to -13.8%) |
| Barbados   | Motorcyclist road injuries                      | 15 (11 to 20) | 14 (11 to 19) | -5.5% (-17.2% to 7.1%)    |
| Barbados   | Non-venomous animal contact                     | 3 (1 to 5)    | 3 (1 to 5)    | -3.2% (-8.4% to 3.3%)     |
| Barbados   | Other exposure to mechanical forces             | 32 (18 to 55) | 38 (21 to 62) | 16.1% (9.8% to 22.5%)     |
| Barbados   | Other road injuries                             | 4 (2 to 7)    | 4 (2 to 6)    | -9.8% (-19.5% to 1.3%)    |
| Barbados   | Other transport injuries                        | 4 (3 to 6)    | 4 (3 to 6)    | -0.9% (-6.5% to 5.5%)     |
| Barbados   | Other unintentional injuries                    | 14 (8 to 23)  | 13 (8 to 22)  | -1.8% (-6.8% to 3.7%)     |
| Barbados   | Pedestrian road injuries                        | 15 (11 to 19) | 11 (8 to 14)  | -26.4% (-34% to -17.6%)   |
| Barbados   | Physical violence by firearm                    | 1 (1 to 1)    | 2 (1 to 2)    | 104.2% (77.3% to 139.1%)  |
| Barbados   | Physical violence by other means                | 14 (10 to 20) | 15 (10 to 22) | 6.3% (-3.2% to 16.2%)     |
| Barbados   | Physical violence by sharp object               | 5 (3 to 7)    | 5 (3 to 8)    | 16.7% (2.6% to 33.1%)     |
| Barbados   | Poisoning by carbon monoxide                    | 0 (0 to 0)    | 0 (0 to 0)    | 21.8% (6.4% to 37.1%)     |
| Barbados   | Poisoning by other means                        | 0 (0 to 0)    | 0 (0 to 0)    | -13.2% (-23.2% to -4.7%)  |
| Barbados   | Pulmonary aspiration and foreign body in airway | 0 (0 to 1)    | 0 (0 to 1)    | -11.7% (-19.5% to -3.7%)  |
| Barbados   | Self-harm by firearm                            | 0 (0 to 0)    | 0 (0 to 0)    | 1.9% (-8.3% to 13.3%)     |
| Barbados   | Self-harm by other specified means              | 0 (0 to 1)    | 0 (0 to 1)    | -11.5% (-18.9% to -4.1%)  |
| Barbados   | Unintentional firearm injuries                  | 5 (3 to 8)    | 5 (3 to 8)    | -11.3% (-21.3% to -1.6%)  |
| Barbados   | Venomous animal contact                         | 5 (2 to 8)    | 4 (2 to 8)    | -3.1% (-7.5% to 2.1%)     |
| Belarus    | Adverse effects of medical treatment            | 0 (0 to 0)    | 0 (0 to 0)    | 0% (0% to 0%)             |
| Belarus    | Conflict and terrorism                          | 0 (0 to 0)    | 0 (0 to 0)    | NA                        |
| Belarus    | Cyclist road injuries                           | 61 (43 to 82) | 44 (31 to 61) | -27.3% (-36.4% to -17%)   |
| Belarus    | Drowning                                        | 1 (1 to 2)    | 1 (1 to 2)    | -1.5% (-11.5% to 9.6%)    |
| Belarus    | Environmental heat and cold exposure            | 12 (9 to 17)  | 10 (7 to 14)  | -15.7% (-24.4% to -4.5%)  |

|         |                                                 |                  |                  |                           |
|---------|-------------------------------------------------|------------------|------------------|---------------------------|
| Belarus | Executions and police conflict                  | 0 (0 to 0)       | 0 (0 to 0)       | NA                        |
| Belarus | Exposure to forces of nature                    | 0 (0 to 0)       | 0 (0 to 0)       | NA                        |
| Belarus | Falls                                           | 268 (209 to 342) | 314 (248 to 406) | 17.4% (12.1% to 23.4%)    |
| Belarus | Fire, heat, and hot substances                  | 5 (3 to 8)       | 4 (3 to 7)       | -7.5% (-14.1% to -0.8%)   |
| Belarus | Foreign body in eyes                            | 0 (0 to 0)       | 0 (0 to 0)       | 0.8% (0.4% to 1.3%)       |
| Belarus | Foreign body in other body part                 | 2 (1 to 4)       | 2 (1 to 4)       | -0.1% (-6.6% to 5.8%)     |
| Belarus | Motor vehicle road injuries                     | 155 (120 to 196) | 108 (83 to 137)  | -30% (-39.8% to -20.3%)   |
| Belarus | Motorcyclist road injuries                      | 24 (18 to 32)    | 15 (11 to 20)    | -39% (-48.8% to -28.1%)   |
| Belarus | Non-venomous animal contact                     | 5 (3 to 8)       | 4 (2 to 7)       | -10.6% (-15.5% to -6%)    |
| Belarus | Other exposure to mechanical forces             | 81 (50 to 128)   | 77 (47 to 121)   | -5% (-11.3% to 0.7%)      |
| Belarus | Other road injuries                             | 3 (1 to 4)       | 2 (1 to 4)       | -17.8% (-28% to -6.7%)    |
| Belarus | Other transport injuries                        | 6 (4 to 8)       | 6 (4 to 8)       | 3.2% (-1.4% to 8.2%)      |
| Belarus | Other unintentional injuries                    | 27 (17 to 44)    | 25 (15 to 40)    | -8.7% (-14.9% to -2.8%)   |
| Belarus | Pedestrian road injuries                        | 78 (61 to 98)    | 37 (28 to 48)    | -52.3% (-58.4% to -45.8%) |
| Belarus | Physical violence by firearm                    | 0 (0 to 0)       | 0 (0 to 1)       | 50.4% (25.8% to 78.8%)    |
| Belarus | Physical violence by other means                | 34 (25 to 48)    | 27 (19 to 37)    | -20.4% (-28.7% to -10.5%) |
| Belarus | Physical violence by sharp object               | 4 (3 to 7)       | 3 (2 to 5)       | -33.4% (-43.4% to -22.7%) |
| Belarus | Poisoning by carbon monoxide                    | 0 (0 to 0)       | 0 (0 to 0)       | -17.5% (-29.9% to -4.4%)  |
| Belarus | Poisoning by other means                        | 0 (0 to 1)       | 0 (0 to 1)       | -10.2% (-20.5% to -0.8%)  |
| Belarus | Pulmonary aspiration and foreign body in airway | 1 (1 to 2)       | 1 (1 to 2)       | -14.4% (-20.8% to -7.2%)  |
| Belarus | Self-harm by firearm                            | 1 (0 to 1)       | 1 (0 to 1)       | 0.5% (-14.5% to 15.8%)    |
| Belarus | Self-harm by other specified means              | 5 (3 to 7)       | 5 (3 to 7)       | -0.8% (-7.8% to 6.9%)     |
| Belarus | Unintentional firearm injuries                  | 1 (1 to 2)       | 1 (1 to 2)       | 3.8% (-7.7% to 15.5%)     |
| Belarus | Venomous animal contact                         | 4 (2 to 7)       | 3 (1 to 6)       | -10.7% (-16.4% to -5.6%)  |
| Belgium | Adverse effects of medical treatment            | 0 (0 to 0)       | 0 (0 to 0)       | 0% (0% to 0%)             |
| Belgium | Conflict and terrorism                          | 1 (0 to 1)       | 0 (0 to 0)       | NA                        |
| Belgium | Cyclist road injuries                           | 27 (19 to 36)    | 21 (15 to 28)    | -24.6% (-36.2% to -12.9%) |
| Belgium | Drowning                                        | 0 (0 to 0)       | 0 (0 to 0)       | 50.1% (36.8% to 65.1%)    |
| Belgium | Environmental heat and cold exposure            | 2 (1 to 2)       | 2 (1 to 3)       | 0% (-5.2% to 4.5%)        |
| Belgium | Executions and police conflict                  | 0 (0 to 0)       | 0 (0 to 0)       | NA                        |
| Belgium | Exposure to forces of nature                    | 0 (0 to 0)       | 0 (0 to 0)       | NA                        |
| Belgium | Falls                                           | 285 (223 to 364) | 372 (293 to 472) | 30.5% (26.3% to 35%)      |
| Belgium | Fire, heat, and hot substances                  | 2 (1 to 4)       | 2 (1 to 4)       | -13.4% (-19.6% to -8.1%)  |
| Belgium | Foreign body in eyes                            | 0 (0 to 0)       | 0 (0 to 0)       | 0.3% (0% to 0.9%)         |
| Belgium | Foreign body in other body part                 | 1 (1 to 3)       | 1 (1 to 3)       | 2.1% (-2.9% to 7.3%)      |
| Belgium | Motor vehicle road injuries                     | 49 (39 to 62)    | 24 (18 to 31)    | -51.9% (-58.6% to -44.6%) |
| Belgium | Motorcyclist road injuries                      | 10 (8 to 14)     | 10 (7 to 13)     | -6.3% (-22% to 11.9%)     |
| Belgium | Non-venomous animal contact                     | 3 (2 to 5)       | 3 (1 to 5)       | -8.4% (-12.6% to -4.1%)   |
| Belgium | Other exposure to mechanical forces             | 49 (30 to 78)    | 46 (28 to 73)    | -5.7% (-12.2% to -0.2%)   |
| Belgium | Other road injuries                             | 1 (1 to 2)       | 1 (1 to 2)       | -11.9% (-26.3% to 2.7%)   |
| Belgium | Other transport injuries                        | 5 (4 to 7)       | 5 (4 to 7)       | 9.1% (4.1% to 13.9%)      |
| Belgium | Other unintentional injuries                    | 26 (17 to 41)    | 24 (15 to 39)    | -6.3% (-11.2% to -1.1%)   |
| Belgium | Pedestrian road injuries                        | 18 (14 to 23)    | 7 (5 to 9)       | -63.4% (-69.7% to -56.7%) |

|         |                                                 |               |               |                           |
|---------|-------------------------------------------------|---------------|---------------|---------------------------|
| Belgium | Physical violence by firearm                    | 1 (0 to 1)    | 1 (0 to 1)    | 10.8% (-1.2% to 25.5%)    |
| Belgium | Physical violence by other means                | 20 (14 to 28) | 17 (12 to 25) | -12.7% (-18.9% to -6.7%)  |
| Belgium | Physical violence by sharp object               | 2 (1 to 3)    | 2 (1 to 3)    | -18.1% (-26.4% to -9.4%)  |
| Belgium | Poisoning by carbon monoxide                    | 0 (0 to 0)    | 0 (0 to 0)    | -23.6% (-31.8% to -14.8%) |
| Belgium | Poisoning by other means                        | 0 (0 to 1)    | 0 (0 to 0)    | -29.2% (-35.3% to -22.5%) |
| Belgium | Pulmonary aspiration and foreign body in airway | 1 (0 to 1)    | 1 (0 to 1)    | -15% (-24.4% to -4.3%)    |
| Belgium | Self-harm by firearm                            | 1 (0 to 1)    | 0 (0 to 1)    | -34.9% (-45.8% to -22%)   |
| Belgium | Self-harm by other specified means              | 5 (3 to 7)    | 4 (3 to 7)    | -6.1% (-11.5% to -0.1%)   |
| Belgium | Unintentional firearm injuries                  | 1 (0 to 2)    | 1 (0 to 2)    | -1% (-9.9% to 8.1%)       |
| Belgium | Venomous animal contact                         | 1 (0 to 2)    | 1 (0 to 2)    | -9% (-14.5% to -2.2%)     |
| Belize  | Adverse effects of medical treatment            | 0 (0 to 0)    | 0 (0 to 0)    | 0% (0% to 0%)             |
| Belize  | Conflict and terrorism                          | 19 (7 to 43)  | 0 (0 to 0)    | NA                        |
| Belize  | Cyclist road injuries                           | 44 (33 to 58) | 35 (26 to 47) | -20.7% (-29.3% to -10%)   |
| Belize  | Drowning                                        | 0 (0 to 1)    | 0 (0 to 1)    | 21.6% (11.7% to 33.9%)    |
| Belize  | Environmental heat and cold exposure            | 10 (7 to 14)  | 10 (7 to 15)  | 4.7% (0.4% to 9.5%)       |
| Belize  | Executions and police conflict                  | 0 (0 to 0)    | 0 (0 to 0)    | NA                        |
| Belize  | Exposure to forces of nature                    | 0 (0 to 0)    | 0 (0 to 0)    | NA                        |
| Belize  | Falls                                           | 41 (32 to 53) | 64 (50 to 84) | 56% (50% to 62.1%)        |
| Belize  | Fire, heat, and hot substances                  | 3 (2 to 6)    | 3 (2 to 6)    | 4.7% (-3% to 14.1%)       |
| Belize  | Foreign body in eyes                            | 0 (0 to 0)    | 0 (0 to 0)    | -0.5% (-1% to 0%)         |
| Belize  | Foreign body in other body part                 | 1 (1 to 3)    | 1 (1 to 3)    | -2% (-6.9% to 3.6%)       |
| Belize  | Motor vehicle road injuries                     | 38 (28 to 49) | 35 (26 to 45) | -6.8% (-17% to 3.6%)      |
| Belize  | Motorcyclist road injuries                      | 15 (11 to 19) | 23 (17 to 30) | 53.9% (31.8% to 78.5%)    |
| Belize  | Non-venomous animal contact                     | 3 (2 to 6)    | 4 (2 to 7)    | 9.9% (1.8% to 19.8%)      |
| Belize  | Other exposure to mechanical forces             | 42 (25 to 69) | 51 (30 to 83) | 22.3% (13.3% to 32.1%)    |
| Belize  | Other road injuries                             | 3 (2 to 6)    | 4 (2 to 6)    | 6% (-5.6% to 18.1%)       |
| Belize  | Other transport injuries                        | 6 (4 to 8)    | 7 (5 to 9)    | 10.2% (1.5% to 18.1%)     |
| Belize  | Other unintentional injuries                    | 12 (8 to 20)  | 13 (8 to 21)  | 3% (-3.2% to 8.9%)        |
| Belize  | Pedestrian road injuries                        | 17 (13 to 22) | 15 (11 to 19) | -10.7% (-19.3% to 0%)     |
| Belize  | Physical violence by firearm                    | 1 (0 to 1)    | 3 (2 to 4)    | 373.2% (300.1% to 481%)   |
| Belize  | Physical violence by other means                | 10 (7 to 15)  | 19 (14 to 29) | 89.3% (69% to 115.7%)     |
| Belize  | Physical violence by sharp object               | 4 (3 to 6)    | 8 (5 to 12)   | 90.2% (65.1% to 123.1%)   |
| Belize  | Poisoning by carbon monoxide                    | 0 (0 to 0)    | 0 (0 to 0)    | 18.1% (-0.3% to 37.9%)    |
| Belize  | Poisoning by other means                        | 0 (0 to 0)    | 0 (0 to 0)    | -29.6% (-40.8% to -17.9%) |
| Belize  | Pulmonary aspiration and foreign body in airway | 1 (0 to 1)    | 0 (0 to 1)    | -24.4% (-32.1% to -15.2%) |
| Belize  | Self-harm by firearm                            | 0 (0 to 0)    | 0 (0 to 1)    | 34% (19.3% to 51.3%)      |
| Belize  | Self-harm by other specified means              | 0 (0 to 1)    | 0 (0 to 1)    | 7.1% (-2.7% to 16.7%)     |
| Belize  | Unintentional firearm injuries                  | 8 (5 to 11)   | 8 (5 to 12)   | 10.4% (-1.9% to 22%)      |
| Belize  | Venomous animal contact                         | 6 (3 to 10)   | 7 (3 to 12)   | 20.8% (11.9% to 32.7%)    |
| Benin   | Adverse effects of medical treatment            | 0 (0 to 0)    | 0 (0 to 0)    | 0% (0% to 0%)             |
| Benin   | Conflict and terrorism                          | 0 (0 to 0)    | 0 (0 to 0)    | NA                        |
| Benin   | Cyclist road injuries                           | 30 (19 to 44) | 30 (19 to 44) | 0.9% (-7.3% to 9.9%)      |
| Benin   | Drowning                                        | 0 (0 to 0)    | 0 (0 to 0)    | -15.3% (-22% to -8.2%)    |

|         |                                                 |                |                |                           |
|---------|-------------------------------------------------|----------------|----------------|---------------------------|
| Benin   | Environmental heat and cold exposure            | 0 (0 to 1)     | 0 (0 to 1)     | 3.9% (-1.4% to 10%)       |
| Benin   | Executions and police conflict                  | 0 (0 to 0)     | 0 (0 to 0)     | NA                        |
| Benin   | Exposure to forces of nature                    | 0 (0 to 0)     | 0 (0 to 0)     | NA                        |
| Benin   | Falls                                           | 18 (12 to 27)  | 20 (13 to 29)  | 11% (6.5% to 15.2%)       |
| Benin   | Fire, heat, and hot substances                  | 0 (0 to 0)     | 0 (0 to 0)     | -6.7% (-12.1% to -1.2%)   |
| Benin   | Foreign body in eyes                            | 0 (0 to 0)     | 0 (0 to 0)     | 0.1% (-0.3% to 0.8%)      |
| Benin   | Foreign body in other body part                 | 3 (1 to 8)     | 3 (1 to 7)     | -0.7% (-5.3% to 3.6%)     |
| Benin   | Motor vehicle road injuries                     | 43 (30 to 63)  | 54 (37 to 75)  | 25.4% (16.1% to 36.3%)    |
| Benin   | Motorcyclist road injuries                      | 47 (35 to 62)  | 37 (27 to 50)  | -22.3% (-28.5% to -16.2%) |
| Benin   | Non-venomous animal contact                     | 3 (1 to 5)     | 3 (1 to 5)     | -2.4% (-6.7% to 2.1%)     |
| Benin   | Other exposure to mechanical forces             | 26 (13 to 46)  | 23 (11 to 43)  | -8.9% (-14.1% to -3.6%)   |
| Benin   | Other road injuries                             | 2 (1 to 3)     | 2 (1 to 3)     | 11.6% (0.9% to 23.3%)     |
| Benin   | Other transport injuries                        | 4 (3 to 5)     | 3 (2 to 4)     | -10.7% (-16.8% to -3.5%)  |
| Benin   | Other unintentional injuries                    | 3 (2 to 5)     | 2 (1 to 4)     | -12.7% (-17.9% to -7.1%)  |
| Benin   | Pedestrian road injuries                        | 39 (28 to 52)  | 47 (34 to 63)  | 21.7% (13.7% to 30.8%)    |
| Benin   | Physical violence by firearm                    | 0 (0 to 0)     | 0 (0 to 0)     | 39.5% (24.3% to 56.8%)    |
| Benin   | Physical violence by other means                | 8 (5 to 11)    | 9 (6 to 13)    | 17% (10.1% to 23.4%)      |
| Benin   | Physical violence by sharp object               | 2 (1 to 3)     | 2 (1 to 4)     | 16.2% (8.3% to 24.6%)     |
| Benin   | Poisoning by carbon monoxide                    | 0 (0 to 0)     | 0 (0 to 0)     | 9.4% (-1.8% to 21.1%)     |
| Benin   | Poisoning by other means                        | 0 (0 to 0)     | 0 (0 to 0)     | -15.9% (-23.4% to -8.2%)  |
| Benin   | Pulmonary aspiration and foreign body in airway | 0 (0 to 0)     | 0 (0 to 0)     | -12.8% (-21.2% to -3.8%)  |
| Benin   | Self-harm by firearm                            | 0 (0 to 0)     | 0 (0 to 0)     | 20.7% (12.5% to 30.2%)    |
| Benin   | Self-harm by other specified means              | 0 (0 to 0)     | 0 (0 to 0)     | 10.9% (4.8% to 16.9%)     |
| Benin   | Unintentional firearm injuries                  | 1 (0 to 2)     | 1 (0 to 2)     | -12.1% (-20.2% to -4.1%)  |
| Benin   | Venomous animal contact                         | 0 (0 to 1)     | 0 (0 to 1)     | -2.2% (-8.7% to 5.4%)     |
| Bermuda | Adverse effects of medical treatment            | 0 (0 to 0)     | 0 (0 to 0)     | 0% (0% to 0%)             |
| Bermuda | Conflict and terrorism                          | 0 (0 to 0)     | 0 (0 to 0)     | NA                        |
| Bermuda | Cyclist road injuries                           | 23 (14 to 36)  | 18 (11 to 29)  | -21% (-30.3% to -9.4%)    |
| Bermuda | Drowning                                        | 0 (0 to 0)     | 0 (0 to 0)     | 48.3% (33.7% to 65.4%)    |
| Bermuda | Environmental heat and cold exposure            | 1 (1 to 3)     | 1 (1 to 3)     | 2.4% (-3% to 8.2%)        |
| Bermuda | Executions and police conflict                  | 0 (0 to 0)     | 0 (0 to 0)     | NA                        |
| Bermuda | Exposure to forces of nature                    | 0 (0 to 0)     | 0 (0 to 0)     | NA                        |
| Bermuda | Falls                                           | 27 (17 to 40)  | 40 (26 to 62)  | 51.9% (44.9% to 58.5%)    |
| Bermuda | Fire, heat, and hot substances                  | 1 (0 to 1)     | 1 (0 to 1)     | 22.8% (17.8% to 28.9%)    |
| Bermuda | Foreign body in eyes                            | 0 (0 to 0)     | 0 (0 to 0)     | 0.5% (0% to 1.1%)         |
| Bermuda | Foreign body in other body part                 | 1 (1 to 3)     | 2 (1 to 3)     | 6.1% (-1.6% to 12.5%)     |
| Bermuda | Motor vehicle road injuries                     | 22 (14 to 33)  | 17 (10 to 25)  | -23.4% (-32.9% to -13.2%) |
| Bermuda | Motorcyclist road injuries                      | 69 (53 to 88)  | 48 (37 to 62)  | -30.5% (-37.5% to -22.3%) |
| Bermuda | Non-venomous animal contact                     | 2 (1 to 4)     | 2 (1 to 3)     | -3.5% (-8.2% to 1.8%)     |
| Bermuda | Other exposure to mechanical forces             | 56 (28 to 103) | 68 (33 to 126) | 21.8% (14.9% to 28.5%)    |
| Bermuda | Other road injuries                             | 6 (3 to 12)    | 5 (2 to 9)     | -20.7% (-29% to -10.6%)   |
| Bermuda | Other transport injuries                        | 3 (2 to 4)     | 3 (2 to 4)     | 8.8% (2.4% to 17.4%)      |
| Bermuda | Other unintentional injuries                    | 5 (3 to 9)     | 5 (3 to 10)    | 12.1% (4.5% to 19.2%)     |



|                                  |                                                 |               |                 |                           |
|----------------------------------|-------------------------------------------------|---------------|-----------------|---------------------------|
| Bermuda                          | Pedestrian road injuries                        | 16 (10 to 23) | 13 (8 to 20)    | -16.8% (-25.8% to -6.5%)  |
| Bermuda                          | Physical violence by firearm                    | 1 (0 to 1)    | 1 (1 to 2)      | 82.6% (62.6% to 107.4%)   |
| Bermuda                          | Physical violence by other means                | 11 (7 to 16)  | 11 (7 to 17)    | -0.4% (-7.4% to 6.4%)     |
| Bermuda                          | Physical violence by sharp object               | 3 (2 to 6)    | 3 (1 to 6)      | -4.5% (-14.1% to 5.2%)    |
| Bermuda                          | Poisoning by carbon monoxide                    | 0 (0 to 0)    | 0 (0 to 0)      | -1% (-14.8% to 13.7%)     |
| Bermuda                          | Poisoning by other means                        | 0 (0 to 0)    | 0 (0 to 0)      | -26.1% (-38% to -13%)     |
| Bermuda                          | Pulmonary aspiration and foreign body in airway | 0 (0 to 0)    | 0 (0 to 0)      | 2.8% (-8.1% to 14.3%)     |
| Bermuda                          | Self-harm by firearm                            | 0 (0 to 0)    | 0 (0 to 0)      | -3.7% (-10.1% to 3.2%)    |
| Bermuda                          | Self-harm by other specified means              | 0 (0 to 0)    | 0 (0 to 0)      | -10.9% (-20.3% to -1.4%)  |
| Bermuda                          | Unintentional firearm injuries                  | 2 (1 to 4)    | 3 (1 to 6)      | 34.2% (22.6% to 46.6%)    |
| Bermuda                          | Venomous animal contact                         | 1 (0 to 3)    | 1 (0 to 3)      | -3.3% (-8.4% to 2.7%)     |
| Bhutan                           | Adverse effects of medical treatment            | 0 (0 to 0)    | 0 (0 to 0)      | 0% (0% to 0%)             |
| Bhutan                           | Conflict and terrorism                          | 0 (0 to 0)    | 0 (0 to 0)      | NA                        |
| Bhutan                           | Cyclist road injuries                           | 73 (53 to 96) | 93 (70 to 122)  | 28.5% (19.4% to 38.5%)    |
| Bhutan                           | Drowning                                        | 0 (0 to 0)    | 0 (0 to 1)      | 14.3% (-0.4% to 27.7%)    |
| Bhutan                           | Environmental heat and cold exposure            | 2 (1 to 3)    | 2 (2 to 3)      | 7% (2.6% to 11.6%)        |
| Bhutan                           | Executions and police conflict                  | 0 (0 to 0)    | 0 (0 to 0)      | NA                        |
| Bhutan                           | Exposure to forces of nature                    | 0 (0 to 0)    | 0 (0 to 0)      | NA                        |
| Bhutan                           | Falls                                           | 60 (48 to 76) | 118 (95 to 150) | 96.7% (86.9% to 108%)     |
| Bhutan                           | Fire, heat, and hot substances                  | 1 (0 to 1)    | 1 (0 to 1)      | -8.5% (-15.4% to -0.9%)   |
| Bhutan                           | Foreign body in eyes                            | 0 (0 to 0)    | 0 (0 to 0)      | 0.6% (-0.1% to 1.7%)      |
| Bhutan                           | Foreign body in other body part                 | 1 (1 to 2)    | 1 (1 to 2)      | 1.9% (-4.1% to 8.5%)      |
| Bhutan                           | Motor vehicle road injuries                     | 44 (33 to 58) | 51 (37 to 68)   | 16.2% (6.4% to 25.9%)     |
| Bhutan                           | Motorcyclist road injuries                      | 32 (24 to 41) | 31 (23 to 41)   | -2.3% (-11.3% to 6.8%)    |
| Bhutan                           | Non-venomous animal contact                     | 10 (6 to 18)  | 8 (5 to 14)     | -22.7% (-28% to -17%)     |
| Bhutan                           | Other exposure to mechanical forces             | 30 (19 to 48) | 26 (16 to 41)   | -14.1% (-20.1% to -8%)    |
| Bhutan                           | Other road injuries                             | 2 (1 to 3)    | 2 (1 to 4)      | 33.3% (22.8% to 46.8%)    |
| Bhutan                           | Other transport injuries                        | 5 (4 to 7)    | 5 (4 to 7)      | -1.2% (-9.1% to 6.9%)     |
| Bhutan                           | Other unintentional injuries                    | 10 (7 to 16)  | 11 (7 to 17)    | 3.6% (-1.2% to 8.4%)      |
| Bhutan                           | Pedestrian road injuries                        | 50 (37 to 63) | 42 (31 to 54)   | -15.5% (-22.1% to -8.4%)  |
| Bhutan                           | Physical violence by firearm                    | 0 (0 to 0)    | 0 (0 to 0)      | 63.6% (37.2% to 91.7%)    |
| Bhutan                           | Physical violence by other means                | 20 (14 to 28) | 20 (14 to 28)   | -0.4% (-6.3% to 5.4%)     |
| Bhutan                           | Physical violence by sharp object               | 1 (0 to 1)    | 1 (0 to 1)      | -11.7% (-19.9% to -3.5%)  |
| Bhutan                           | Poisoning by carbon monoxide                    | 0 (0 to 0)    | 0 (0 to 0)      | 45.3% (28.7% to 64.3%)    |
| Bhutan                           | Poisoning by other means                        | 0 (0 to 0)    | 0 (0 to 0)      | 0.1% (-8.7% to 9.1%)      |
| Bhutan                           | Pulmonary aspiration and foreign body in airway | 0 (0 to 1)    | 0 (0 to 1)      | -27.5% (-34.7% to -20.1%) |
| Bhutan                           | Self-harm by firearm                            | 0 (0 to 0)    | 0 (0 to 0)      | 20.8% (5.1% to 40.5%)     |
| Bhutan                           | Self-harm by other specified means              | 1 (1 to 2)    | 1 (1 to 2)      | 1.4% (-4.5% to 7.8%)      |
| Bhutan                           | Unintentional firearm injuries                  | 1 (1 to 2)    | 1 (0 to 1)      | -40.9% (-48.3% to -33.9%) |
| Bhutan                           | Venomous animal contact                         | 4 (2 to 9)    | 4 (1 to 8)      | -9.3% (-16.8% to -0.4%)   |
| Bolivia (Plurinational State of) | Adverse effects of medical treatment            | 0 (0 to 0)    | 0 (0 to 0)      | 0% (0% to 0%)             |
| Bolivia (Plurinational State of) | Conflict and terrorism                          | 1 (0 to 1)    | 0 (0 to 0)      | NA                        |
| Bolivia (Plurinational State of) | Cyclist road injuries                           | 11 (7 to 15)  | 9 (6 to 13)     | -14.5% (-22.5% to -6.1%)  |

|                                  |                                                 |                  |                  |                           |
|----------------------------------|-------------------------------------------------|------------------|------------------|---------------------------|
| Bolivia (Plurinational State of) | Drowning                                        | 0 (0 to 1)       | 0 (0 to 0)       | -22.4% (-30.2% to -13.1%) |
| Bolivia (Plurinational State of) | Environmental heat and cold exposure            | 8 (6 to 11)      | 8 (6 to 12)      | 0.5% (-3.5% to 5.3%)      |
| Bolivia (Plurinational State of) | Executions and police conflict                  | 0 (0 to 0)       | 0 (0 to 0)       | NA                        |
| Bolivia (Plurinational State of) | Exposure to forces of nature                    | 0 (0 to 0)       | 2 (1 to 3)       | NA                        |
| Bolivia (Plurinational State of) | Falls                                           | 60 (47 to 77)    | 79 (61 to 102)   | 32% (25.9% to 38.4%)      |
| Bolivia (Plurinational State of) | Fire, heat, and hot substances                  | 3 (2 to 6)       | 3 (2 to 5)       | -21.1% (-28.9% to -13.7%) |
| Bolivia (Plurinational State of) | Foreign body in eyes                            | 0 (0 to 0)       | 0 (0 to 0)       | 0.8% (0.3% to 1.3%)       |
| Bolivia (Plurinational State of) | Foreign body in other body part                 | 2 (1 to 5)       | 2 (1 to 4)       | -10.9% (-18.8% to -4.1%)  |
| Bolivia (Plurinational State of) | Motor vehicle road injuries                     | 24 (18 to 31)    | 21 (16 to 26)    | -13.3% (-20.7% to -5.7%)  |
| Bolivia (Plurinational State of) | Motorcyclist road injuries                      | 8 (6 to 10)      | 7 (5 to 9)       | -6.1% (-14.9% to 4.1%)    |
| Bolivia (Plurinational State of) | Non-venomous animal contact                     | 3 (2 to 6)       | 3 (2 to 5)       | -7.7% (-13.4% to -2.5%)   |
| Bolivia (Plurinational State of) | Other exposure to mechanical forces             | 34 (20 to 54)    | 33 (20 to 53)    | -2.5% (-9.9% to 5.4%)     |
| Bolivia (Plurinational State of) | Other road injuries                             | 2 (1 to 4)       | 2 (1 to 4)       | -9.5% (-18.4% to 0.2%)    |
| Bolivia (Plurinational State of) | Other transport injuries                        | 5 (4 to 6)       | 5 (4 to 6)       | -8.7% (-13.9% to -3.8%)   |
| Bolivia (Plurinational State of) | Other unintentional injuries                    | 24 (16 to 37)    | 16 (11 to 25)    | -32.6% (-36.9% to -28.1%) |
| Bolivia (Plurinational State of) | Pedestrian road injuries                        | 18 (14 to 23)    | 12 (9 to 15)     | -35.7% (-41.2% to -29.6%) |
| Bolivia (Plurinational State of) | Physical violence by firearm                    | 0 (0 to 1)       | 1 (0 to 1)       | 67.6% (43.6% to 97.3%)    |
| Bolivia (Plurinational State of) | Physical violence by other means                | 8 (6 to 12)      | 8 (6 to 12)      | -4.1% (-10.6% to 3.1%)    |
| Bolivia (Plurinational State of) | Physical violence by sharp object               | 3 (2 to 4)       | 3 (2 to 4)       | -4.7% (-13.6% to 5.4%)    |
| Bolivia (Plurinational State of) | Poisoning by carbon monoxide                    | 0 (0 to 0)       | 0 (0 to 0)       | 46.4% (25.1% to 70.9%)    |
| Bolivia (Plurinational State of) | Poisoning by other means                        | 0 (0 to 0)       | 0 (0 to 0)       | -18.2% (-26.1% to -9.9%)  |
| Bolivia (Plurinational State of) | Pulmonary aspiration and foreign body in airway | 1 (1 to 3)       | 1 (0 to 1)       | -54.6% (-61.6% to -47.2%) |
| Bolivia (Plurinational State of) | Self-harm by firearm                            | 0 (0 to 0)       | 0 (0 to 0)       | 23.3% (8.8% to 38.2%)     |
| Bolivia (Plurinational State of) | Self-harm by other specified means              | 0 (0 to 1)       | 1 (0 to 1)       | 13.6% (6.1% to 22.1%)     |
| Bolivia (Plurinational State of) | Unintentional firearm injuries                  | 5 (3 to 7)       | 3 (2 to 5)       | -29.7% (-37.6% to -22%)   |
| Bolivia (Plurinational State of) | Venomous animal contact                         | 6 (3 to 11)      | 6 (3 to 10)      | -8.7% (-13.1% to -4.3%)   |
| Bosnia and Herzegovina           | Adverse effects of medical treatment            | 0 (0 to 0)       | 0 (0 to 0)       | 0% (0% to 0%)             |
| Bosnia and Herzegovina           | Conflict and terrorism                          | 47 (19 to 109)   | 0 (0 to 0)       | NA                        |
| Bosnia and Herzegovina           | Cyclist road injuries                           | 68 (49 to 91)    | 66 (48 to 89)    | -2% (-10.6% to 6.3%)      |
| Bosnia and Herzegovina           | Drowning                                        | 0 (0 to 0)       | 0 (0 to 1)       | 97.3% (71.1% to 126.3%)   |
| Bosnia and Herzegovina           | Environmental heat and cold exposure            | 2 (1 to 2)       | 2 (1 to 2)       | 6.1% (0.2% to 12.8%)      |
| Bosnia and Herzegovina           | Executions and police conflict                  | 0 (0 to 0)       | 0 (0 to 0)       | NA                        |
| Bosnia and Herzegovina           | Exposure to forces of nature                    | 0 (0 to 0)       | 0 (0 to 0)       | NA                        |
| Bosnia and Herzegovina           | Falls                                           | 188 (144 to 249) | 237 (179 to 316) | 25.7% (20.5% to 30.8%)    |
| Bosnia and Herzegovina           | Fire, heat, and hot substances                  | 5 (3 to 8)       | 4 (2 to 7)       | -19% (-24.1% to -14.3%)   |
| Bosnia and Herzegovina           | Foreign body in eyes                            | 0 (0 to 0)       | 0 (0 to 0)       | 0% (-0.2% to 0.5%)        |
| Bosnia and Herzegovina           | Foreign body in other body part                 | 3 (1 to 5)       | 2 (1 to 5)       | -4.7% (-9.1% to 0.6%)     |
| Bosnia and Herzegovina           | Motor vehicle road injuries                     | 69 (51 to 90)    | 83 (62 to 106)   | 20.9% (10.6% to 31.5%)    |
| Bosnia and Herzegovina           | Motorcyclist road injuries                      | 12 (9 to 17)     | 13 (10 to 18)    | 7.8% (-5.2% to 22.3%)     |
| Bosnia and Herzegovina           | Non-venomous animal contact                     | 8 (5 to 15)      | 6 (3 to 10)      | -30.2% (-34.6% to -24.7%) |
| Bosnia and Herzegovina           | Other exposure to mechanical forces             | 149 (92 to 236)  | 137 (84 to 216)  | -8% (-13.9% to -1.7%)     |
| Bosnia and Herzegovina           | Other road injuries                             | 2 (1 to 3)       | 2 (1 to 3)       | -7.5% (-15.7% to 2%)      |
| Bosnia and Herzegovina           | Other transport injuries                        | 7 (5 to 9)       | 6 (4 to 8)       | -7.5% (-12.3% to -3.6%)   |

|                        |                                                 |               |               |                           |
|------------------------|-------------------------------------------------|---------------|---------------|---------------------------|
| Bosnia and Herzegovina | Other unintentional injuries                    | 34 (21 to 56) | 30 (19 to 50) | -10.4% (-15.8% to -5.6%)  |
| Bosnia and Herzegovina | Pedestrian road injuries                        | 35 (26 to 45) | 33 (24 to 43) | -6.2% (-13.2% to 1.7%)    |
| Bosnia and Herzegovina | Physical violence by firearm                    | 0 (0 to 0)    | 0 (0 to 1)    | 127.3% (104% to 155%)     |
| Bosnia and Herzegovina | Physical violence by other means                | 37 (26 to 52) | 30 (22 to 43) | -17.5% (-23.1% to -11.6%) |
| Bosnia and Herzegovina | Physical violence by sharp object               | 2 (1 to 3)    | 2 (1 to 3)    | 3.8% (-5.8% to 14.8%)     |
| Bosnia and Herzegovina | Poisoning by carbon monoxide                    | 0 (0 to 0)    | 0 (0 to 0)    | -10% (-26.7% to 10.4%)    |
| Bosnia and Herzegovina | Poisoning by other means                        | 1 (1 to 1)    | 0 (0 to 1)    | -47% (-57.1% to -35.3%)   |
| Bosnia and Herzegovina | Pulmonary aspiration and foreign body in airway | 1 (1 to 2)    | 1 (1 to 2)    | -15.2% (-22.8% to -6.7%)  |
| Bosnia and Herzegovina | Self-harm by firearm                            | 0 (0 to 1)    | 0 (0 to 1)    | 32.3% (16% to 49.3%)      |
| Bosnia and Herzegovina | Self-harm by other specified means              | 2 (1 to 3)    | 2 (1 to 3)    | -1.6% (-7.2% to 3.8%)     |
| Bosnia and Herzegovina | Unintentional firearm injuries                  | 1 (1 to 2)    | 1 (1 to 2)    | -19.8% (-28% to -11.4%)   |
| Bosnia and Herzegovina | Venomous animal contact                         | 7 (3 to 13)   | 5 (2 to 9)    | -31.3% (-35.5% to -26.5%) |
| Botswana               | Adverse effects of medical treatment            | 0 (0 to 0)    | 0 (0 to 0)    | 0% (0% to 0%)             |
| Botswana               | Conflict and terrorism                          | 2 (1 to 6)    | 0 (0 to 0)    | NA                        |
| Botswana               | Cyclist road injuries                           | 12 (7 to 19)  | 16 (10 to 24) | 26.7% (18% to 36.8%)      |
| Botswana               | Drowning                                        | 0 (0 to 0)    | 0 (0 to 0)    | -0.1% (-9.4% to 11%)      |
| Botswana               | Environmental heat and cold exposure            | 0 (0 to 1)    | 0 (0 to 1)    | -10% (-16.5% to -3.7%)    |
| Botswana               | Executions and police conflict                  | 0 (0 to 0)    | 0 (0 to 0)    | NA                        |
| Botswana               | Exposure to forces of nature                    | 0 (0 to 0)    | 0 (0 to 0)    | NA                        |
| Botswana               | Falls                                           | 23 (15 to 36) | 26 (16 to 40) | 11.9% (7.5% to 16.6%)     |
| Botswana               | Fire, heat, and hot substances                  | 0 (0 to 0)    | 0 (0 to 0)    | -7.8% (-13.2% to -1.1%)   |
| Botswana               | Foreign body in eyes                            | 0 (0 to 0)    | 0 (0 to 0)    | 0.4% (-0.1% to 1.3%)      |
| Botswana               | Foreign body in other body part                 | 4 (2 to 9)    | 4 (2 to 9)    | -3.9% (-9.8% to 2.4%)     |
| Botswana               | Motor vehicle road injuries                     | 31 (21 to 43) | 41 (28 to 56) | 32.8% (22.6% to 42.9%)    |
| Botswana               | Motorcyclist road injuries                      | 8 (6 to 11)   | 8 (6 to 12)   | 4.2% (-6.1% to 14.2%)     |
| Botswana               | Non-venomous animal contact                     | 4 (2 to 8)    | 3 (1 to 6)    | -23.5% (-27.5% to -19.6%) |
| Botswana               | Other exposure to mechanical forces             | 32 (16 to 59) | 28 (14 to 51) | -13.1% (-18.8% to -7.9%)  |
| Botswana               | Other road injuries                             | 1 (1 to 3)    | 2 (1 to 4)    | 29.8% (18.2% to 42.9%)    |
| Botswana               | Other transport injuries                        | 3 (2 to 5)    | 3 (2 to 5)    | -7.9% (-13.1% to -1.5%)   |
| Botswana               | Other unintentional injuries                    | 3 (2 to 5)    | 2 (1 to 4)    | -17.6% (-22.2% to -12.3%) |
| Botswana               | Pedestrian road injuries                        | 38 (28 to 50) | 43 (31 to 56) | 12.2% (4.4% to 19.6%)     |
| Botswana               | Physical violence by firearm                    | 0 (0 to 0)    | 1 (0 to 1)    | 266.9% (208.3% to 348.8%) |
| Botswana               | Physical violence by other means                | 6 (4 to 10)   | 17 (11 to 26) | 157.5% (125.5% to 198.5%) |
| Botswana               | Physical violence by sharp object               | 2 (1 to 4)    | 5 (3 to 10)   | 153.7% (116.2% to 205.7%) |
| Botswana               | Poisoning by carbon monoxide                    | 0 (0 to 0)    | 0 (0 to 0)    | 14.2% (2.5% to 26.5%)     |
| Botswana               | Poisoning by other means                        | 0 (0 to 0)    | 0 (0 to 0)    | -21.2% (-28.9% to -13.5%) |
| Botswana               | Pulmonary aspiration and foreign body in airway | 0 (0 to 0)    | 0 (0 to 0)    | -15.3% (-22.5% to -8.3%)  |
| Botswana               | Self-harm by firearm                            | 0 (0 to 0)    | 0 (0 to 0)    | 25.3% (15.9% to 35.8%)    |
| Botswana               | Self-harm by other specified means              | 0 (0 to 0)    | 0 (0 to 0)    | 17.9% (10.7% to 25.1%)    |
| Botswana               | Unintentional firearm injuries                  | 1 (0 to 1)    | 0 (0 to 1)    | -15.7% (-24.4% to -6.3%)  |
| Botswana               | Venomous animal contact                         | 0 (0 to 1)    | 0 (0 to 1)    | -24.6% (-31.4% to -17.7%) |
| Brazil                 | Adverse effects of medical treatment            | 0 (0 to 0)    | 0 (0 to 0)    | 0% (0% to 0%)             |
| Brazil                 | Conflict and terrorism                          | 0 (0 to 0)    | 0 (0 to 0)    | NA                        |

|                   |                                                 |                  |                  |                           |
|-------------------|-------------------------------------------------|------------------|------------------|---------------------------|
| Brazil            | Cyclist road injuries                           | 9 (5 to 15)      | 6 (4 to 11)      | -33.1% (-42% to -22.6%)   |
| Brazil            | Drowning                                        | 0 (0 to 0)       | 0 (0 to 0)       | -41% (-44.7% to -37.2%)   |
| Brazil            | Environmental heat and cold exposure            | 2 (1 to 4)       | 2 (1 to 4)       | -0.6% (-7.4% to 7.2%)     |
| Brazil            | Executions and police conflict                  | 0 (0 to 0)       | 0 (0 to 0)       | NA                        |
| Brazil            | Exposure to forces of nature                    | 0 (0 to 0)       | 0 (0 to 0)       | NA                        |
| Brazil            | Falls                                           | 83 (52 to 128)   | 78 (49 to 119)   | -5.9% (-7.9% to -3.9%)    |
| Brazil            | Fire, heat, and hot substances                  | 1 (0 to 1)       | 0 (0 to 1)       | -53.1% (-55.5% to -50.5%) |
| Brazil            | Foreign body in eyes                            | 0 (0 to 0)       | 0 (0 to 0)       | -0.2% (-0.5% to 0%)       |
| Brazil            | Foreign body in other body part                 | 1 (0 to 2)       | 0 (0 to 1)       | -60.8% (-65.2% to -51.6%) |
| Brazil            | Motor vehicle road injuries                     | 16 (10 to 24)    | 8 (5 to 13)      | -49% (-57% to -40.8%)     |
| Brazil            | Motorcyclist road injuries                      | 17 (12 to 25)    | 41 (30 to 55)    | 136.3% (106% to 172.3%)   |
| Brazil            | Non-venomous animal contact                     | 2 (1 to 5)       | 1 (0 to 2)       | -53.9% (-57.1% to -49.5%) |
| Brazil            | Other exposure to mechanical forces             | 42 (21 to 78)    | 31 (15 to 57)    | -25.4% (-28.2% to -21.9%) |
| Brazil            | Other road injuries                             | 4 (2 to 7)       | 6 (3 to 10)      | 42.4% (25.3% to 63.1%)    |
| Brazil            | Other transport injuries                        | 3 (2 to 4)       | 1 (1 to 2)       | -53% (-55.3% to -50.6%)   |
| Brazil            | Other unintentional injuries                    | 8 (5 to 15)      | 6 (4 to 11)      | -27.7% (-30.4% to -24.5%) |
| Brazil            | Pedestrian road injuries                        | 39 (29 to 52)    | 22 (15 to 31)    | -43.9% (-51.2% to -36.8%) |
| Brazil            | Physical violence by firearm                    | 3 (2 to 5)       | 5 (3 to 9)       | 92.2% (65.2% to 127.5%)   |
| Brazil            | Physical violence by other means                | 20 (13 to 31)    | 15 (9 to 24)     | -27% (-34.3% to -21.2%)   |
| Brazil            | Physical violence by sharp object               | 5 (2 to 9)       | 3 (1 to 6)       | -36.1% (-44.1% to -28.6%) |
| Brazil            | Poisoning by carbon monoxide                    | 0 (0 to 0)       | 0 (0 to 0)       | -31.3% (-42.3% to -11.6%) |
| Brazil            | Poisoning by other means                        | 0 (0 to 0)       | 0 (0 to 0)       | -46.6% (-52.3% to -39.4%) |
| Brazil            | Pulmonary aspiration and foreign body in airway | 0 (0 to 0)       | 0 (0 to 0)       | -48.5% (-54.1% to -43.8%) |
| Brazil            | Self-harm by firearm                            | 0 (0 to 0)       | 0 (0 to 0)       | 4.6% (-4.5% to 17.9%)     |
| Brazil            | Self-harm by other specified means              | 0 (0 to 0)       | 0 (0 to 0)       | -37.6% (-47.5% to -30.1%) |
| Brazil            | Unintentional firearm injuries                  | 2 (1 to 4)       | 1 (0 to 2)       | -56.6% (-60.3% to -52.2%) |
| Brazil            | Venomous animal contact                         | 3 (1 to 6)       | 1 (0 to 3)       | -53.4% (-56.6% to -48.6%) |
| Brunei Darussalam | Adverse effects of medical treatment            | 0 (0 to 0)       | 0 (0 to 0)       | 0% (0% to 0%)             |
| Brunei Darussalam | Conflict and terrorism                          | 0 (0 to 0)       | 0 (0 to 0)       | NA                        |
| Brunei Darussalam | Cyclist road injuries                           | 31 (21 to 42)    | 22 (16 to 30)    | -28.2% (-34.3% to -21.3%) |
| Brunei Darussalam | Drowning                                        | 0 (0 to 1)       | 1 (0 to 1)       | 28.3% (16.8% to 40.6%)    |
| Brunei Darussalam | Environmental heat and cold exposure            | 4 (3 to 6)       | 5 (3 to 7)       | 4.8% (0.5% to 9.4%)       |
| Brunei Darussalam | Executions and police conflict                  | 0 (0 to 0)       | 0 (0 to 0)       | NA                        |
| Brunei Darussalam | Exposure to forces of nature                    | 0 (0 to 0)       | 0 (0 to 0)       | NA                        |
| Brunei Darussalam | Falls                                           | 168 (131 to 217) | 179 (141 to 228) | 6.6% (2.9% to 10.8%)      |
| Brunei Darussalam | Fire, heat, and hot substances                  | 4 (2 to 6)       | 3 (2 to 5)       | -26% (-31.5% to -20.6%)   |
| Brunei Darussalam | Foreign body in eyes                            | 0 (0 to 0)       | 0 (0 to 0)       | -0.4% (-1% to -0.1%)      |
| Brunei Darussalam | Foreign body in other body part                 | 3 (1 to 5)       | 3 (2 to 6)       | 16.2% (8.4% to 25.9%)     |
| Brunei Darussalam | Motor vehicle road injuries                     | 67 (51 to 84)    | 34 (26 to 44)    | -48.5% (-52.6% to -44.3%) |
| Brunei Darussalam | Motorcyclist road injuries                      | 20 (15 to 26)    | 13 (10 to 17)    | -32.1% (-40% to -23.9%)   |
| Brunei Darussalam | Non-venomous animal contact                     | 5 (3 to 9)       | 4 (2 to 8)       | -9.8% (-14.3% to -5.3%)   |
| Brunei Darussalam | Other exposure to mechanical forces             | 73 (45 to 114)   | 68 (42 to 106)   | -7.1% (-11.6% to -2.4%)   |
| Brunei Darussalam | Other road injuries                             | 2 (1 to 3)       | 1 (1 to 2)       | -34.3% (-40.8% to -27.3%) |

|                   |                                                 |                  |                  |                           |
|-------------------|-------------------------------------------------|------------------|------------------|---------------------------|
| Brunei Darussalam | Other transport injuries                        | 9 (7 to 11)      | 5 (4 to 7)       | -42.1% (-47.8% to -34.6%) |
| Brunei Darussalam | Other unintentional injuries                    | 36 (24 to 57)    | 29 (19 to 46)    | -20.5% (-26% to -15.3%)   |
| Brunei Darussalam | Pedestrian road injuries                        | 17 (13 to 22)    | 13 (9 to 16)     | -27.4% (-33.5% to -20.7%) |
| Brunei Darussalam | Physical violence by firearm                    | 0 (0 to 0)       | 0 (0 to 1)       | 75.1% (50.9% to 103.8%)   |
| Brunei Darussalam | Physical violence by other means                | 17 (12 to 24)    | 13 (9 to 19)     | -22.1% (-27.9% to -15.4%) |
| Brunei Darussalam | Physical violence by sharp object               | 1 (1 to 2)       | 1 (1 to 2)       | -19.3% (-30.7% to -8%)    |
| Brunei Darussalam | Poisoning by carbon monoxide                    | 0 (0 to 0)       | 0 (0 to 0)       | -1.7% (-11% to 9.1%)      |
| Brunei Darussalam | Poisoning by other means                        | 0 (0 to 1)       | 0 (0 to 0)       | -20% (-26.1% to -13%)     |
| Brunei Darussalam | Pulmonary aspiration and foreign body in airway | 0 (0 to 1)       | 1 (0 to 1)       | 1.5% (-5.9% to 9.2%)      |
| Brunei Darussalam | Self-harm by firearm                            | 0 (0 to 0)       | 0 (0 to 0)       | -0.1% (-15.9% to 15.3%)   |
| Brunei Darussalam | Self-harm by other specified means              | 1 (1 to 2)       | 1 (1 to 2)       | 5.7% (-1.4% to 12.9%)     |
| Brunei Darussalam | Unintentional firearm injuries                  | 1 (1 to 2)       | 1 (1 to 2)       | -5% (-13.4% to 3.2%)      |
| Brunei Darussalam | Venomous animal contact                         | 2 (1 to 4)       | 2 (1 to 4)       | -6.7% (-11.8% to -0.8%)   |
| Bulgaria          | Adverse effects of medical treatment            | 0 (0 to 0)       | 0 (0 to 0)       | 0% (0% to 0%)             |
| Bulgaria          | Conflict and terrorism                          | 0 (0 to 0)       | 0 (0 to 0)       | NA                        |
| Bulgaria          | Cyclist road injuries                           | 64 (46 to 86)    | 58 (41 to 79)    | -9.7% (-19.8% to 2%)      |
| Bulgaria          | Drowning                                        | 0 (0 to 0)       | 0 (0 to 1)       | 25% (9.5% to 39.4%)       |
| Bulgaria          | Environmental heat and cold exposure            | 3 (2 to 4)       | 2 (2 to 3)       | -11.5% (-15.7% to -6.8%)  |
| Bulgaria          | Executions and police conflict                  | 0 (0 to 0)       | 0 (0 to 0)       | NA                        |
| Bulgaria          | Exposure to forces of nature                    | 0 (0 to 0)       | 0 (0 to 0)       | NA                        |
| Bulgaria          | Falls                                           | 255 (195 to 333) | 250 (190 to 333) | -2.1% (-7.4% to 2.9%)     |
| Bulgaria          | Fire, heat, and hot substances                  | 4 (2 to 6)       | 4 (2 to 6)       | -7.1% (-13.3% to -1.2%)   |
| Bulgaria          | Foreign body in eyes                            | 0 (0 to 0)       | 0 (0 to 0)       | 0.2% (-0.1% to 0.6%)      |
| Bulgaria          | Foreign body in other body part                 | 3 (1 to 5)       | 2 (1 to 5)       | -1.6% (-7.6% to 4.4%)     |
| Bulgaria          | Motor vehicle road injuries                     | 114 (88 to 145)  | 112 (87 to 143)  | -1.7% (-14.8% to 12.2%)   |
| Bulgaria          | Motorcyclist road injuries                      | 22 (16 to 28)    | 18 (13 to 24)    | -16.1% (-29.1% to -1.5%)  |
| Bulgaria          | Non-venomous animal contact                     | 6 (3 to 11)      | 5 (3 to 10)      | -11% (-15.3% to -6.5%)    |
| Bulgaria          | Other exposure to mechanical forces             | 148 (93 to 230)  | 158 (99 to 243)  | 6.2% (0.6% to 12.1%)      |
| Bulgaria          | Other road injuries                             | 2 (1 to 3)       | 1 (1 to 2)       | -12.6% (-23.1% to -0.5%)  |
| Bulgaria          | Other transport injuries                        | 9 (7 to 12)      | 7 (5 to 9)       | -23.3% (-29.1% to -17.2%) |
| Bulgaria          | Other unintentional injuries                    | 59 (39 to 92)    | 30 (19 to 49)    | -48.9% (-55.5% to -41.6%) |
| Bulgaria          | Pedestrian road injuries                        | 53 (41 to 67)    | 26 (19 to 34)    | -51.6% (-58.3% to -44.6%) |
| Bulgaria          | Physical violence by firearm                    | 0 (0 to 1)       | 0 (0 to 1)       | -12.9% (-30.1% to 5.5%)   |
| Bulgaria          | Physical violence by other means                | 41 (30 to 56)    | 26 (18 to 36)    | -36.2% (-44.7% to -27.4%) |
| Bulgaria          | Physical violence by sharp object               | 3 (2 to 6)       | 2 (1 to 3)       | -45% (-55.7% to -34.1%)   |
| Bulgaria          | Poisoning by carbon monoxide                    | 0 (0 to 0)       | 0 (0 to 0)       | 25.6% (8.5% to 41.9%)     |
| Bulgaria          | Poisoning by other means                        | 0 (0 to 1)       | 0 (0 to 1)       | -6.8% (-17.8% to 4.2%)    |
| Bulgaria          | Pulmonary aspiration and foreign body in airway | 1 (1 to 2)       | 1 (0 to 2)       | -25.5% (-34.4% to -17.4%) |
| Bulgaria          | Self-harm by firearm                            | 1 (0 to 1)       | 1 (0 to 1)       | -11.7% (-23.4% to 2%)     |
| Bulgaria          | Self-harm by other specified means              | 4 (2 to 6)       | 2 (1 to 3)       | -37.3% (-41.5% to -33%)   |
| Bulgaria          | Unintentional firearm injuries                  | 1 (1 to 2)       | 1 (1 to 2)       | -7.8% (-16.5% to 1.1%)    |
| Bulgaria          | Venomous animal contact                         | 5 (2 to 10)      | 4 (2 to 8)       | -12.4% (-16.8% to -7.7%)  |
| Burkina Faso      | Adverse effects of medical treatment            | 0 (0 to 0)       | 0 (0 to 0)       | 0% (0% to 0%)             |

|              |                                                 |               |               |                           |
|--------------|-------------------------------------------------|---------------|---------------|---------------------------|
| Burkina Faso | Conflict and terrorism                          | 0 (0 to 0)    | 14 (4 to 36)  | NA                        |
| Burkina Faso | Cyclist road injuries                           | 28 (18 to 41) | 36 (24 to 54) | 31% (21.5% to 41.1%)      |
| Burkina Faso | Drowning                                        | 0 (0 to 0)    | 0 (0 to 0)    | -6.5% (-12.8% to 1%)      |
| Burkina Faso | Environmental heat and cold exposure            | 0 (0 to 1)    | 0 (0 to 1)    | 2.5% (-2.5% to 8%)        |
| Burkina Faso | Executions and police conflict                  | 0 (0 to 0)    | 5 (2 to 11)   | NA                        |
| Burkina Faso | Exposure to forces of nature                    | 0 (0 to 0)    | 0 (0 to 0)    | NA                        |
| Burkina Faso | Falls                                           | 18 (12 to 26) | 21 (14 to 31) | 17.7% (14% to 21.8%)      |
| Burkina Faso | Fire, heat, and hot substances                  | 0 (0 to 0)    | 0 (0 to 0)    | -2.2% (-8.1% to 3.3%)     |
| Burkina Faso | Foreign body in eyes                            | 0 (0 to 0)    | 0 (0 to 0)    | -0.1% (-0.6% to 0.3%)     |
| Burkina Faso | Foreign body in other body part                 | 3 (1 to 7)    | 3 (1 to 7)    | -1.9% (-6% to 2.4%)       |
| Burkina Faso | Motor vehicle road injuries                     | 41 (28 to 59) | 49 (33 to 69) | 18.3% (9.2% to 27.9%)     |
| Burkina Faso | Motorcyclist road injuries                      | 31 (22 to 43) | 43 (31 to 59) | 37.6% (28.2% to 48%)      |
| Burkina Faso | Non-venomous animal contact                     | 3 (1 to 6)    | 3 (1 to 5)    | -12% (-16.2% to -8%)      |
| Burkina Faso | Other exposure to mechanical forces             | 21 (10 to 38) | 21 (10 to 38) | -1% (-6.4% to 5.3%)       |
| Burkina Faso | Other road injuries                             | 2 (1 to 4)    | 2 (1 to 4)    | 8.5% (-0.3% to 18.1%)     |
| Burkina Faso | Other transport injuries                        | 3 (2 to 4)    | 3 (2 to 4)    | -6.3% (-11.6% to -0.2%)   |
| Burkina Faso | Other unintentional injuries                    | 3 (2 to 4)    | 2 (1 to 4)    | -8.9% (-13.1% to -3.8%)   |
| Burkina Faso | Pedestrian road injuries                        | 52 (38 to 69) | 56 (40 to 74) | 5.9% (-1% to 13.3%)       |
| Burkina Faso | Physical violence by firearm                    | 0 (0 to 0)    | 0 (0 to 1)    | 25.4% (11% to 42.3%)      |
| Burkina Faso | Physical violence by other means                | 9 (6 to 14)   | 10 (6 to 14)  | 5.5% (0.4% to 10.9%)      |
| Burkina Faso | Physical violence by sharp object               | 3 (1 to 5)    | 3 (1 to 5)    | 4.3% (-2.3% to 11.7%)     |
| Burkina Faso | Poisoning by carbon monoxide                    | 0 (0 to 0)    | 0 (0 to 0)    | 5.1% (-4% to 15.4%)       |
| Burkina Faso | Poisoning by other means                        | 0 (0 to 0)    | 0 (0 to 0)    | -10.4% (-16.8% to -3.4%)  |
| Burkina Faso | Pulmonary aspiration and foreign body in airway | 0 (0 to 0)    | 0 (0 to 0)    | -8.7% (-17.6% to -0.3%)   |
| Burkina Faso | Self-harm by firearm                            | 0 (0 to 0)    | 0 (0 to 0)    | 19.2% (11.7% to 28.5%)    |
| Burkina Faso | Self-harm by other specified means              | 0 (0 to 0)    | 0 (0 to 0)    | 12.2% (6.4% to 18.2%)     |
| Burkina Faso | Unintentional firearm injuries                  | 1 (0 to 2)    | 1 (0 to 2)    | -10% (-17.6% to -2.4%)    |
| Burkina Faso | Venomous animal contact                         | 0 (0 to 1)    | 0 (0 to 1)    | -11.7% (-17.5% to -5.1%)  |
| Burundi      | Adverse effects of medical treatment            | 0 (0 to 0)    | 0 (0 to 0)    | 0% (0% to 0%)             |
| Burundi      | Conflict and terrorism                          | 1 (0 to 2)    | 4 (2 to 9)    | NA                        |
| Burundi      | Cyclist road injuries                           | 67 (50 to 87) | 54 (40 to 70) | -19.5% (-25.5% to -13.7%) |
| Burundi      | Drowning                                        | 0 (0 to 0)    | 0 (0 to 0)    | -24% (-29.6% to -17.8%)   |
| Burundi      | Environmental heat and cold exposure            | 2 (2 to 3)    | 2 (1 to 3)    | -11.2% (-16.8% to -5.6%)  |
| Burundi      | Executions and police conflict                  | 0 (0 to 0)    | 1 (0 to 2)    | NA                        |
| Burundi      | Exposure to forces of nature                    | 0 (0 to 0)    | 0 (0 to 0)    | NA                        |
| Burundi      | Falls                                           | 50 (39 to 64) | 53 (41 to 69) | 6.4% (1.3% to 11.6%)      |
| Burundi      | Fire, heat, and hot substances                  | 2 (1 to 4)    | 2 (1 to 3)    | -18.1% (-23.9% to -12.9%) |
| Burundi      | Foreign body in eyes                            | 0 (0 to 0)    | 0 (0 to 0)    | 2.3% (1.1% to 4.2%)       |
| Burundi      | Foreign body in other body part                 | 3 (1 to 5)    | 3 (1 to 5)    | 3.3% (-2.8% to 9.1%)      |
| Burundi      | Motor vehicle road injuries                     | 42 (32 to 55) | 40 (29 to 52) | -5.1% (-12.5% to 2.9%)    |
| Burundi      | Motorcyclist road injuries                      | 15 (12 to 20) | 14 (11 to 19) | -6.2% (-13.1% to 1.7%)    |
| Burundi      | Non-venomous animal contact                     | 11 (6 to 18)  | 10 (6 to 17)  | -7.3% (-12.5% to -2%)     |
| Burundi      | Other exposure to mechanical forces             | 17 (10 to 29) | 16 (10 to 27) | -6.1% (-12.4% to -0.4%)   |



|            |                                                 |               |               |                           |
|------------|-------------------------------------------------|---------------|---------------|---------------------------|
| Burundi    | Other road injuries                             | 1 (1 to 2)    | 1 (1 to 2)    | 16.8% (6.9% to 27.8%)     |
| Burundi    | Other transport injuries                        | 6 (5 to 8)    | 6 (4 to 7)    | -8.6% (-14.4% to -1.8%)   |
| Burundi    | Other unintentional injuries                    | 9 (6 to 14)   | 7 (5 to 11)   | -22% (-26.8% to -17%)     |
| Burundi    | Pedestrian road injuries                        | 63 (49 to 79) | 55 (42 to 68) | -13.4% (-19% to -7.2%)    |
| Burundi    | Physical violence by firearm                    | 0 (0 to 0)    | 0 (0 to 0)    | 22.1% (10.2% to 36.8%)    |
| Burundi    | Physical violence by other means                | 4 (2 to 5)    | 4 (2 to 5)    | 1.6% (-3.6% to 8%)        |
| Burundi    | Physical violence by sharp object               | 1 (1 to 2)    | 1 (1 to 2)    | 0.9% (-5.4% to 8.3%)      |
| Burundi    | Poisoning by carbon monoxide                    | 0 (0 to 0)    | 0 (0 to 0)    | 7.2% (-2.9% to 19.3%)     |
| Burundi    | Poisoning by other means                        | 0 (0 to 0)    | 0 (0 to 0)    | -23% (-29.3% to -16.2%)   |
| Burundi    | Pulmonary aspiration and foreign body in airway | 0 (0 to 1)    | 0 (0 to 1)    | -5.4% (-15.6% to 8.2%)    |
| Burundi    | Self-harm by firearm                            | 0 (0 to 0)    | 0 (0 to 0)    | -0.9% (-13.1% to 15.3%)   |
| Burundi    | Self-harm by other specified means              | 1 (1 to 2)    | 1 (1 to 2)    | -26.1% (-29.8% to -22.4%) |
| Burundi    | Unintentional firearm injuries                  | 2 (1 to 3)    | 2 (1 to 3)    | -13.4% (-21.1% to -5.9%)  |
| Burundi    | Venomous animal contact                         | 4 (2 to 9)    | 4 (1 to 8)    | -15.3% (-22.5% to -8.3%)  |
| Cabo Verde | Adverse effects of medical treatment            | 0 (0 to 0)    | 0 (0 to 0)    | 0% (0% to 0%)             |
| Cabo Verde | Conflict and terrorism                          | 0 (0 to 0)    | 0 (0 to 0)    | NA                        |
| Cabo Verde | Cyclist road injuries                           | 24 (15 to 36) | 27 (17 to 40) | 11.4% (3.3% to 20%)       |
| Cabo Verde | Drowning                                        | 0 (0 to 0)    | 0 (0 to 0)    | 55.3% (41.9% to 67.8%)    |
| Cabo Verde | Environmental heat and cold exposure            | 0 (0 to 1)    | 0 (0 to 1)    | 7.2% (1.2% to 14.1%)      |
| Cabo Verde | Executions and police conflict                  | 0 (0 to 0)    | 0 (0 to 0)    | NA                        |
| Cabo Verde | Exposure to forces of nature                    | 0 (0 to 0)    | 0 (0 to 0)    | NA                        |
| Cabo Verde | Falls                                           | 18 (12 to 28) | 26 (17 to 38) | 42% (36.7% to 47.9%)      |
| Cabo Verde | Fire, heat, and hot substances                  | 0 (0 to 0)    | 0 (0 to 0)    | 9.2% (2.9% to 15.5%)      |
| Cabo Verde | Foreign body in eyes                            | 0 (0 to 0)    | 0 (0 to 0)    | 2.1% (0.1% to 5.5%)       |
| Cabo Verde | Foreign body in other body part                 | 4 (2 to 8)    | 4 (2 to 8)    | -1.7% (-6.7% to 3.3%)     |
| Cabo Verde | Motor vehicle road injuries                     | 25 (17 to 36) | 35 (24 to 50) | 39.9% (28.7% to 52.7%)    |
| Cabo Verde | Motorcyclist road injuries                      | 16 (11 to 23) | 20 (14 to 29) | 24.2% (15.2% to 34.2%)    |
| Cabo Verde | Non-venomous animal contact                     | 3 (1 to 6)    | 2 (1 to 5)    | -13.7% (-20.1% to -6.5%)  |
| Cabo Verde | Other exposure to mechanical forces             | 27 (13 to 50) | 26 (13 to 47) | -4.6% (-9.7% to 0.6%)     |
| Cabo Verde | Other road injuries                             | 2 (1 to 5)    | 2 (1 to 5)    | 1.6% (-7.3% to 10.9%)     |
| Cabo Verde | Other transport injuries                        | 3 (2 to 4)    | 3 (2 to 4)    | 5% (-0.8% to 11.7%)       |
| Cabo Verde | Other unintentional injuries                    | 4 (2 to 6)    | 3 (2 to 6)    | -11.1% (-16.5% to -6.1%)  |
| Cabo Verde | Pedestrian road injuries                        | 37 (27 to 49) | 47 (34 to 62) | 28.1% (19.2% to 37.2%)    |
| Cabo Verde | Physical violence by firearm                    | 0 (0 to 1)    | 1 (0 to 1)    | 110.8% (89.6% to 138.5%)  |
| Cabo Verde | Physical violence by other means                | 14 (9 to 22)  | 16 (11 to 24) | 12.1% (4.8% to 20.5%)     |
| Cabo Verde | Physical violence by sharp object               | 3 (2 to 6)    | 4 (2 to 7)    | 16.1% (7.6% to 27%)       |
| Cabo Verde | Poisoning by carbon monoxide                    | 0 (0 to 0)    | 0 (0 to 0)    | 20.4% (10.2% to 32.6%)    |
| Cabo Verde | Poisoning by other means                        | 0 (0 to 0)    | 0 (0 to 0)    | -6% (-11.5% to -0.3%)     |
| Cabo Verde | Pulmonary aspiration and foreign body in airway | 0 (0 to 0)    | 0 (0 to 0)    | -21.1% (-29.1% to -13.4%) |
| Cabo Verde | Self-harm by firearm                            | 0 (0 to 0)    | 0 (0 to 0)    | 48.3% (35.1% to 61.8%)    |
| Cabo Verde | Self-harm by other specified means              | 0 (0 to 0)    | 0 (0 to 0)    | 37.9% (27.2% to 50.4%)    |
| Cabo Verde | Unintentional firearm injuries                  | 1 (0 to 2)    | 1 (0 to 2)    | -11.4% (-19.2% to -2.7%)  |
| Cabo Verde | Venomous animal contact                         | 1 (0 to 1)    | 0 (0 to 1)    | -21.6% (-28.4% to -13.2%) |

|          |                                                 |               |                 |                           |
|----------|-------------------------------------------------|---------------|-----------------|---------------------------|
| Cambodia | Adverse effects of medical treatment            | 0 (0 to 0)    | 0 (0 to 0)      | 0% (0% to 0%)             |
| Cambodia | Conflict and terrorism                          | 22 (9 to 51)  | 0 (0 to 0)      | NA                        |
| Cambodia | Cyclist road injuries                           | 16 (11 to 23) | 17 (12 to 24)   | 5.8% (-3.6% to 16.1%)     |
| Cambodia | Drowning                                        | 1 (0 to 1)    | 0 (0 to 1)      | -31.2% (-36.2% to -24.5%) |
| Cambodia | Environmental heat and cold exposure            | 2 (1 to 2)    | 2 (1 to 3)      | 5.1% (0.7% to 9.9%)       |
| Cambodia | Executions and police conflict                  | 0 (0 to 0)    | 0 (0 to 0)      | NA                        |
| Cambodia | Exposure to forces of nature                    | 0 (0 to 0)    | 0 (0 to 0)      | NA                        |
| Cambodia | Falls                                           | 71 (57 to 90) | 123 (99 to 155) | 73.5% (67.6% to 79.9%)    |
| Cambodia | Fire, heat, and hot substances                  | 1 (1 to 2)    | 1 (1 to 2)      | -25.5% (-32% to -18.6%)   |
| Cambodia | Foreign body in eyes                            | 0 (0 to 0)    | 0 (0 to 0)      | 2.8% (1.6% to 4.3%)       |
| Cambodia | Foreign body in other body part                 | 1 (0 to 2)    | 1 (0 to 2)      | -0.5% (-5.7% to 5.3%)     |
| Cambodia | Motor vehicle road injuries                     | 22 (16 to 30) | 21 (15 to 28)   | -5.9% (-13.7% to 3.1%)    |
| Cambodia | Motorcyclist road injuries                      | 39 (31 to 49) | 39 (31 to 50)   | 1.9% (-7.1% to 11.5%)     |
| Cambodia | Non-venomous animal contact                     | 6 (4 to 11)   | 5 (3 to 8)      | -26.2% (-31% to -21.2%)   |
| Cambodia | Other exposure to mechanical forces             | 17 (10 to 28) | 15 (9 to 25)    | -11.4% (-16.6% to -6.1%)  |
| Cambodia | Other road injuries                             | 1 (1 to 2)    | 1 (1 to 2)      | 6.3% (-5.2% to 18.2%)     |
| Cambodia | Other transport injuries                        | 5 (4 to 7)    | 5 (4 to 7)      | -11.5% (-18.9% to -2.8%)  |
| Cambodia | Other unintentional injuries                    | 8 (5 to 13)   | 9 (5 to 14)     | 7.7% (-0.3% to 15.7%)     |
| Cambodia | Pedestrian road injuries                        | 15 (11 to 19) | 13 (10 to 17)   | -9.8% (-17.3% to -2.3%)   |
| Cambodia | Physical violence by firearm                    | 0 (0 to 0)    | 0 (0 to 0)      | 22.4% (5.6% to 40.5%)     |
| Cambodia | Physical violence by other means                | 16 (11 to 22) | 15 (10 to 22)   | -3.3% (-10.4% to 4.2%)    |
| Cambodia | Physical violence by sharp object               | 3 (2 to 5)    | 3 (2 to 5)      | -5.5% (-16.2% to 5.6%)    |
| Cambodia | Poisoning by carbon monoxide                    | 0 (0 to 0)    | 0 (0 to 0)      | 44.6% (29% to 62.1%)      |
| Cambodia | Poisoning by other means                        | 0 (0 to 0)    | 0 (0 to 0)      | -8.1% (-16.3% to -0.6%)   |
| Cambodia | Pulmonary aspiration and foreign body in airway | 0 (0 to 0)    | 0 (0 to 0)      | -26.1% (-33.3% to -17.3%) |
| Cambodia | Self-harm by firearm                            | 0 (0 to 0)    | 0 (0 to 0)      | 60.9% (35.4% to 95.3%)    |
| Cambodia | Self-harm by other specified means              | 1 (1 to 2)    | 1 (1 to 2)      | -9.8% (-15% to -4.2%)     |
| Cambodia | Unintentional firearm injuries                  | 2 (1 to 3)    | 2 (1 to 3)      | -11.4% (-20% to -2.6%)    |
| Cambodia | Venomous animal contact                         | 1 (0 to 3)    | 1 (0 to 3)      | -17.1% (-23.3% to -10.2%) |
| Cameroon | Adverse effects of medical treatment            | 0 (0 to 0)    | 0 (0 to 0)      | 0% (0% to 0%)             |
| Cameroon | Conflict and terrorism                          | 0 (0 to 1)    | 10 (3 to 24)    | NA                        |
| Cameroon | Cyclist road injuries                           | 29 (19 to 45) | 36 (23 to 54)   | 23.5% (14.9% to 33.3%)    |
| Cameroon | Drowning                                        | 0 (0 to 0)    | 0 (0 to 0)      | -6.4% (-13.1% to 0.4%)    |
| Cameroon | Environmental heat and cold exposure            | 0 (0 to 1)    | 0 (0 to 1)      | -0.5% (-5.6% to 6%)       |
| Cameroon | Executions and police conflict                  | 0 (0 to 0)    | 1 (0 to 3)      | NA                        |
| Cameroon | Exposure to forces of nature                    | 0 (0 to 0)    | 0 (0 to 0)      | NA                        |
| Cameroon | Falls                                           | 19 (12 to 29) | 22 (15 to 33)   | 15.7% (11.6% to 19.7%)    |
| Cameroon | Fire, heat, and hot substances                  | 0 (0 to 0)    | 0 (0 to 0)      | -6.8% (-11.9% to -0.9%)   |
| Cameroon | Foreign body in eyes                            | 0 (0 to 0)    | 0 (0 to 0)      | 0.1% (-0.1% to 0.5%)      |
| Cameroon | Foreign body in other body part                 | 3 (1 to 7)    | 3 (1 to 8)      | 2.2% (-3.3% to 7.8%)      |
| Cameroon | Motor vehicle road injuries                     | 67 (47 to 93) | 75 (52 to 103)  | 11.7% (3.3% to 20.6%)     |
| Cameroon | Motorcyclist road injuries                      | 60 (44 to 79) | 61 (45 to 81)   | 2.3% (-4.2% to 9.6%)      |
| Cameroon | Non-venomous animal contact                     | 2 (1 to 5)    | 3 (1 to 5)      | 0.2% (-4.8% to 5.6%)      |

|          |                                                 |                  |                  |                           |
|----------|-------------------------------------------------|------------------|------------------|---------------------------|
| Cameroon | Other exposure to mechanical forces             | 25 (13 to 45)    | 23 (11 to 43)    | -8.7% (-14.9% to -2.8%)   |
| Cameroon | Other road injuries                             | 2 (1 to 4)       | 2 (1 to 5)       | 24.3% (13.1% to 36.2%)    |
| Cameroon | Other transport injuries                        | 3 (2 to 4)       | 3 (2 to 4)       | -3% (-9.2% to 4.2%)       |
| Cameroon | Other unintentional injuries                    | 3 (2 to 5)       | 2 (1 to 4)       | -10.2% (-15.6% to -4.1%)  |
| Cameroon | Pedestrian road injuries                        | 38 (27 to 52)    | 40 (28 to 54)    | 5.3% (-2.4% to 13.3%)     |
| Cameroon | Physical violence by firearm                    | 0 (0 to 0)       | 0 (0 to 0)       | 32.5% (15.4% to 52.1%)    |
| Cameroon | Physical violence by other means                | 5 (3 to 8)       | 5 (3 to 8)       | -2.9% (-8.2% to 2%)       |
| Cameroon | Physical violence by sharp object               | 1 (1 to 2)       | 1 (1 to 2)       | 1.3% (-6.2% to 8.8%)      |
| Cameroon | Poisoning by carbon monoxide                    | 0 (0 to 0)       | 0 (0 to 0)       | 10.9% (-0.5% to 25.2%)    |
| Cameroon | Poisoning by other means                        | 0 (0 to 0)       | 0 (0 to 0)       | -15.1% (-22.4% to -7.1%)  |
| Cameroon | Pulmonary aspiration and foreign body in airway | 0 (0 to 0)       | 0 (0 to 0)       | 1.8% (-8.2% to 11.7%)     |
| Cameroon | Self-harm by firearm                            | 0 (0 to 0)       | 0 (0 to 0)       | 37.9% (28.6% to 49.6%)    |
| Cameroon | Self-harm by other specified means              | 0 (0 to 0)       | 0 (0 to 0)       | 25.6% (17.9% to 33.5%)    |
| Cameroon | Unintentional firearm injuries                  | 1 (0 to 2)       | 1 (0 to 2)       | -11.1% (-19.8% to -1.1%)  |
| Cameroon | Venomous animal contact                         | 0 (0 to 1)       | 0 (0 to 1)       | -0.1% (-7.7% to 7.2%)     |
| Canada   | Adverse effects of medical treatment            | 0 (0 to 0)       | 0 (0 to 0)       | 0% (0% to 0%)             |
| Canada   | Conflict and terrorism                          | 0 (0 to 0)       | 0 (0 to 0)       | NA                        |
| Canada   | Cyclist road injuries                           | 15 (10 to 21)    | 13 (9 to 17)     | -14.1% (-27.4% to 0.9%)   |
| Canada   | Drowning                                        | 0 (0 to 0)       | 0 (0 to 1)       | 38.6% (22.8% to 56.2%)    |
| Canada   | Environmental heat and cold exposure            | 4 (3 to 5)       | 3 (2 to 5)       | -8.3% (-13.9% to -3.8%)   |
| Canada   | Executions and police conflict                  | 0 (0 to 0)       | 0 (0 to 0)       | NA                        |
| Canada   | Exposure to forces of nature                    | 0 (0 to 0)       | 0 (0 to 0)       | NA                        |
| Canada   | Falls                                           | 182 (147 to 228) | 224 (181 to 279) | 23.5% (18.4% to 28.9%)    |
| Canada   | Fire, heat, and hot substances                  | 3 (2 to 5)       | 2 (1 to 4)       | -18.8% (-25.5% to -13.4%) |
| Canada   | Foreign body in eyes                            | 0 (0 to 0)       | 0 (0 to 0)       | 0.3% (0% to 0.9%)         |
| Canada   | Foreign body in other body part                 | 1 (1 to 3)       | 1 (1 to 3)       | 0.3% (-3.8% to 4.2%)      |
| Canada   | Motor vehicle road injuries                     | 75 (59 to 92)    | 44 (34 to 55)    | -40.8% (-48.4% to -31%)   |
| Canada   | Motorcyclist road injuries                      | 10 (7 to 13)     | 8 (6 to 11)      | -18.6% (-34.1% to 0.8%)   |
| Canada   | Non-venomous animal contact                     | 6 (3 to 10)      | 6 (3 to 10)      | -4.6% (-8.7% to -0.5%)    |
| Canada   | Other exposure to mechanical forces             | 51 (31 to 81)    | 44 (26 to 70)    | -14.7% (-21.7% to -8.2%)  |
| Canada   | Other road injuries                             | 1 (1 to 2)       | 1 (1 to 2)       | 21.3% (2.9% to 44.4%)     |
| Canada   | Other transport injuries                        | 19 (14 to 24)    | 18 (14 to 23)    | -1.9% (-5.1% to 1.6%)     |
| Canada   | Other unintentional injuries                    | 32 (21 to 50)    | 27 (18 to 43)    | -14.9% (-19.6% to -10.2%) |
| Canada   | Pedestrian road injuries                        | 9 (7 to 11)      | 7 (5 to 9)       | -18.7% (-29.6% to -5.6%)  |
| Canada   | Physical violence by firearm                    | 1 (1 to 1)       | 1 (1 to 2)       | 43.4% (29.8% to 56.4%)    |
| Canada   | Physical violence by other means                | 17 (12 to 25)    | 18 (13 to 26)    | 4.6% (-3.7% to 11.7%)     |
| Canada   | Physical violence by sharp object               | 3 (2 to 4)       | 3 (2 to 4)       | -0.1% (-10% to 10.4%)     |
| Canada   | Poisoning by carbon monoxide                    | 0 (0 to 0)       | 0 (0 to 0)       | 7.9% (-0.7% to 16.9%)     |
| Canada   | Poisoning by other means                        | 0 (0 to 1)       | 0 (0 to 1)       | -8.9% (-13.9% to -4.2%)   |
| Canada   | Pulmonary aspiration and foreign body in airway | 1 (1 to 1)       | 1 (0 to 1)       | -12.8% (-18.8% to -7.5%)  |
| Canada   | Self-harm by firearm                            | 0 (0 to 1)       | 0 (0 to 0)       | -47.1% (-58.4% to -34.2%) |
| Canada   | Self-harm by other specified means              | 6 (4 to 9)       | 6 (4 to 10)      | 1.4% (-5.1% to 7.9%)      |
| Canada   | Unintentional firearm injuries                  | 2 (1 to 3)       | 2 (1 to 3)       | -0.8% (-12.7% to 11.6%)   |

|                          |                                                 |                |               |                           |
|--------------------------|-------------------------------------------------|----------------|---------------|---------------------------|
| Canada                   | Venomous animal contact                         | 3 (1 to 6)     | 3 (1 to 5)    | -4.6% (-9.6% to 0.4%)     |
| Central African Republic | Adverse effects of medical treatment            | 0 (0 to 0)     | 0 (0 to 0)    | 0% (0% to 0%)             |
| Central African Republic | Conflict and terrorism                          | 0 (0 to 0)     | 39 (16 to 89) | NA                        |
| Central African Republic | Cyclist road injuries                           | 18 (12 to 25)  | 20 (13 to 27) | 11% (3.7% to 19.2%)       |
| Central African Republic | Drowning                                        | 0 (0 to 0)     | 0 (0 to 0)    | -17.5% (-23.5% to -10.9%) |
| Central African Republic | Environmental heat and cold exposure            | 2 (2 to 3)     | 2 (1 to 3)    | -3.3% (-7.7% to 1.4%)     |
| Central African Republic | Executions and police conflict                  | 0 (0 to 0)     | 0 (0 to 1)    | NA                        |
| Central African Republic | Exposure to forces of nature                    | 0 (0 to 0)     | 0 (0 to 0)    | NA                        |
| Central African Republic | Falls                                           | 35 (28 to 44)  | 34 (27 to 44) | -2.2% (-5.7% to 1.2%)     |
| Central African Republic | Fire, heat, and hot substances                  | 1 (1 to 2)     | 1 (1 to 1)    | -8.5% (-13.1% to -3.4%)   |
| Central African Republic | Foreign body in eyes                            | 0 (0 to 0)     | 0 (0 to 0)    | -0.2% (-0.8% to 0.3%)     |
| Central African Republic | Foreign body in other body part                 | 3 (2 to 7)     | 3 (2 to 7)    | -1.9% (-6.7% to 3.3%)     |
| Central African Republic | Motor vehicle road injuries                     | 30 (22 to 39)  | 30 (22 to 40) | 2% (-5.2% to 10.1%)       |
| Central African Republic | Motorcyclist road injuries                      | 15 (11 to 19)  | 18 (14 to 23) | 21.3% (10.5% to 33.4%)    |
| Central African Republic | Non-venomous animal contact                     | 8 (5 to 14)    | 8 (5 to 14)   | 1.5% (-2.9% to 6.5%)      |
| Central African Republic | Other exposure to mechanical forces             | 14 (8 to 23)   | 13 (7 to 21)  | -9.5% (-15% to -3%)       |
| Central African Republic | Other road injuries                             | 1 (1 to 2)     | 1 (1 to 2)    | 8.4% (0.2% to 17.9%)      |
| Central African Republic | Other transport injuries                        | 6 (5 to 8)     | 6 (5 to 8)    | 1.3% (-3.2% to 6.2%)      |
| Central African Republic | Other unintentional injuries                    | 7 (5 to 12)    | 7 (4 to 10)   | -12.8% (-17.2% to -8.1%)  |
| Central African Republic | Pedestrian road injuries                        | 38 (29 to 47)  | 35 (27 to 44) | -7.1% (-12.3% to -1.2%)   |
| Central African Republic | Physical violence by firearm                    | 0 (0 to 0)     | 0 (0 to 0)    | 121.2% (94.6% to 155.1%)  |
| Central African Republic | Physical violence by other means                | 6 (4 to 8)     | 14 (10 to 19) | 142.7% (112.9% to 173.9%) |
| Central African Republic | Physical violence by sharp object               | 2 (2 to 4)     | 6 (4 to 9)    | 157.8% (124.6% to 200%)   |
| Central African Republic | Poisoning by carbon monoxide                    | 0 (0 to 0)     | 0 (0 to 0)    | -0.3% (-9.7% to 10.4%)    |
| Central African Republic | Poisoning by other means                        | 0 (0 to 0)     | 0 (0 to 0)    | -13.6% (-19.4% to -7.6%)  |
| Central African Republic | Pulmonary aspiration and foreign body in airway | 0 (0 to 1)     | 0 (0 to 1)    | -3.8% (-13.6% to 6.9%)    |
| Central African Republic | Self-harm by firearm                            | 0 (0 to 1)     | 0 (0 to 1)    | -3.6% (-13.9% to 8.8%)    |
| Central African Republic | Self-harm by other specified means              | 1 (1 to 2)     | 1 (1 to 2)    | -13.1% (-17.9% to -8.1%)  |
| Central African Republic | Unintentional firearm injuries                  | 1 (1 to 2)     | 1 (1 to 2)    | -3.6% (-10.5% to 3.9%)    |
| Central African Republic | Venomous animal contact                         | 1 (0 to 4)     | 2 (1 to 4)    | 9.7% (3.3% to 18.3%)      |
| Chad                     | Adverse effects of medical treatment            | 0 (0 to 0)     | 0 (0 to 0)    | 0% (0% to 0%)             |
| Chad                     | Conflict and terrorism                          | 53 (16 to 133) | 8 (2 to 20)   | NA                        |
| Chad                     | Cyclist road injuries                           | 24 (15 to 35)  | 28 (18 to 42) | 19.6% (11.2% to 27.8%)    |
| Chad                     | Drowning                                        | 0 (0 to 0)     | 0 (0 to 0)    | -6.9% (-12.2% to -1%)     |
| Chad                     | Environmental heat and cold exposure            | 0 (0 to 1)     | 0 (0 to 1)    | 3.9% (-1.4% to 9.8%)      |
| Chad                     | Executions and police conflict                  | 0 (0 to 0)     | 0 (0 to 0)    | NA                        |
| Chad                     | Exposure to forces of nature                    | 0 (0 to 0)     | 0 (0 to 0)    | NA                        |
| Chad                     | Falls                                           | 15 (10 to 23)  | 18 (11 to 27) | 14.1% (10.3% to 17.8%)    |
| Chad                     | Fire, heat, and hot substances                  | 0 (0 to 0)     | 0 (0 to 0)    | 5.2% (-0.1% to 11.1%)     |
| Chad                     | Foreign body in eyes                            | 0 (0 to 0)     | 0 (0 to 0)    | 1.6% (0.2% to 3.5%)       |
| Chad                     | Foreign body in other body part                 | 4 (1 to 8)     | 4 (2 to 8)    | 0.4% (-4.8% to 6.3%)      |
| Chad                     | Motor vehicle road injuries                     | 42 (29 to 58)  | 54 (37 to 74) | 28.2% (19.6% to 37.5%)    |
| Chad                     | Motorcyclist road injuries                      | 15 (10 to 21)  | 22 (16 to 31) | 49.1% (37.8% to 60.8%)    |

|       |                                                 |                  |                  |                           |
|-------|-------------------------------------------------|------------------|------------------|---------------------------|
| Chad  | Non-venomous animal contact                     | 3 (1 to 6)       | 3 (2 to 6)       | 2.5% (-2% to 7.7%)        |
| Chad  | Other exposure to mechanical forces             | 26 (13 to 47)    | 25 (12 to 45)    | -4% (-9% to 1.3%)         |
| Chad  | Other road injuries                             | 2 (1 to 4)       | 2 (1 to 4)       | 12% (4% to 20.7%)         |
| Chad  | Other transport injuries                        | 3 (2 to 4)       | 3 (2 to 4)       | 1.3% (-4.1% to 7.4%)      |
| Chad  | Other unintentional injuries                    | 3 (2 to 5)       | 3 (2 to 5)       | -6.5% (-10.6% to -1.7%)   |
| Chad  | Pedestrian road injuries                        | 51 (38 to 66)    | 59 (43 to 77)    | 16.1% (9.4% to 22.6%)     |
| Chad  | Physical violence by firearm                    | 0 (0 to 0)       | 0 (0 to 0)       | 29.1% (18.5% to 40.4%)    |
| Chad  | Physical violence by other means                | 7 (5 to 10)      | 9 (6 to 13)      | 26.5% (19.8% to 34.2%)    |
| Chad  | Physical violence by sharp object               | 2 (1 to 3)       | 2 (1 to 4)       | 22.7% (13.7% to 33.4%)    |
| Chad  | Poisoning by carbon monoxide                    | 0 (0 to 0)       | 0 (0 to 0)       | 9.2% (-1% to 21.3%)       |
| Chad  | Poisoning by other means                        | 0 (0 to 0)       | 0 (0 to 0)       | -4.9% (-11.1% to 2.3%)    |
| Chad  | Pulmonary aspiration and foreign body in airway | 0 (0 to 0)       | 0 (0 to 0)       | -6.4% (-16.2% to 3.5%)    |
| Chad  | Self-harm by firearm                            | 0 (0 to 0)       | 0 (0 to 0)       | 31.3% (22.3% to 42.9%)    |
| Chad  | Self-harm by other specified means              | 0 (0 to 0)       | 0 (0 to 0)       | 20.7% (14.6% to 27%)      |
| Chad  | Unintentional firearm injuries                  | 1 (0 to 2)       | 1 (0 to 2)       | -12.3% (-18.8% to -5.5%)  |
| Chad  | Venomous animal contact                         | 0 (0 to 1)       | 1 (0 to 1)       | 3.9% (-2.9% to 11.9%)     |
| Chile | Adverse effects of medical treatment            | 0 (0 to 0)       | 0 (0 to 0)       | 0% (0% to 0%)             |
| Chile | Conflict and terrorism                          | 0 (0 to 1)       | 0 (0 to 0)       | NA                        |
| Chile | Cyclist road injuries                           | 21 (15 to 28)    | 24 (17 to 32)    | 16.2% (4.5% to 31.6%)     |
| Chile | Drowning                                        | 0 (0 to 0)       | 0 (0 to 1)       | 68.2% (46.5% to 91.7%)    |
| Chile | Environmental heat and cold exposure            | 2 (1 to 3)       | 2 (1 to 2)       | -14.8% (-21.1% to -9.7%)  |
| Chile | Executions and police conflict                  | 0 (0 to 0)       | 0 (0 to 0)       | NA                        |
| Chile | Exposure to forces of nature                    | 0 (0 to 0)       | 0 (0 to 0)       | NA                        |
| Chile | Falls                                           | 138 (107 to 178) | 177 (137 to 228) | 28.6% (23.8% to 33.4%)    |
| Chile | Fire, heat, and hot substances                  | 6 (3 to 9)       | 4 (2 to 7)       | -27% (-35% to -20.7%)     |
| Chile | Foreign body in eyes                            | 0 (0 to 0)       | 0 (0 to 0)       | 0.2% (0% to 0.6%)         |
| Chile | Foreign body in other body part                 | 2 (1 to 5)       | 2 (1 to 5)       | 3.9% (-0.9% to 9.5%)      |
| Chile | Motor vehicle road injuries                     | 32 (25 to 42)    | 33 (25 to 42)    | 1.6% (-8.6% to 13.2%)     |
| Chile | Motorcyclist road injuries                      | 4 (3 to 5)       | 6 (5 to 8)       | 68.1% (45.7% to 96%)      |
| Chile | Non-venomous animal contact                     | 5 (3 to 9)       | 4 (2 to 8)       | -18.9% (-22.7% to -14.8%) |
| Chile | Other exposure to mechanical forces             | 82 (51 to 128)   | 85 (52 to 133)   | 3.4% (-2.8% to 10.3%)     |
| Chile | Other road injuries                             | 1 (1 to 2)       | 1 (1 to 2)       | 6.9% (-4.3% to 19.7%)     |
| Chile | Other transport injuries                        | 4 (3 to 5)       | 4 (3 to 5)       | -5.8% (-12.1% to 0.1%)    |
| Chile | Other unintentional injuries                    | 31 (20 to 50)    | 28 (18 to 45)    | -10.8% (-17.9% to -4.3%)  |
| Chile | Pedestrian road injuries                        | 20 (16 to 25)    | 15 (12 to 20)    | -23.2% (-31.2% to -14.6%) |
| Chile | Physical violence by firearm                    | 0 (0 to 1)       | 1 (1 to 2)       | 260.4% (182.6% to 366.9%) |
| Chile | Physical violence by other means                | 37 (27 to 52)    | 30 (21 to 43)    | -20.1% (-31.8% to -7.3%)  |
| Chile | Physical violence by sharp object               | 4 (2 to 6)       | 7 (5 to 12)      | 94.4% (53.2% to 145.1%)   |
| Chile | Poisoning by carbon monoxide                    | 0 (0 to 0)       | 0 (0 to 0)       | 33.2% (21.1% to 45.6%)    |
| Chile | Poisoning by other means                        | 0 (0 to 1)       | 0 (0 to 1)       | 6.1% (-1.9% to 13.1%)     |
| Chile | Pulmonary aspiration and foreign body in airway | 1 (1 to 2)       | 0 (0 to 1)       | -55.8% (-63.3% to -46.6%) |
| Chile | Self-harm by firearm                            | 1 (0 to 1)       | 0 (0 to 1)       | -40.8% (-50.6% to -30.6%) |
| Chile | Self-harm by other specified means              | 3 (2 to 5)       | 3 (2 to 4)       | -14.9% (-20.3% to -9%)    |

|          |                                                 |                 |                |                           |
|----------|-------------------------------------------------|-----------------|----------------|---------------------------|
| Chile    | Unintentional firearm injuries                  | 4 (2 to 6)      | 3 (2 to 6)     | -16.7% (-28.1% to -5.1%)  |
| Chile    | Venomous animal contact                         | 4 (1 to 7)      | 3 (1 to 6)     | -21.1% (-25.4% to -16.9%) |
| China    | Adverse effects of medical treatment            | 0 (0 to 0)      | 0 (0 to 0)     | 0% (0% to 0%)             |
| China    | Conflict and terrorism                          | 0 (0 to 0)      | 0 (0 to 0)     | NA                        |
| China    | Cyclist road injuries                           | 11 (7 to 17)    | 21 (13 to 32)  | 92.2% (82.2% to 102.4%)   |
| China    | Drowning                                        | 0 (0 to 0)      | 0 (0 to 0)     | -10.2% (-21.4% to 1.5%)   |
| China    | Environmental heat and cold exposure            | 0 (0 to 1)      | 0 (0 to 1)     | -10.7% (-16.6% to -5.4%)  |
| China    | Executions and police conflict                  | 0 (0 to 0)      | 0 (0 to 0)     | NA                        |
| China    | Exposure to forces of nature                    | 1 (0 to 1)      | 0 (0 to 0)     | NA                        |
| China    | Falls                                           | 45 (29 to 69)   | 56 (37 to 82)  | 23% (17.2% to 30.1%)      |
| China    | Fire, heat, and hot substances                  | 0 (0 to 0)      | 0 (0 to 0)     | 10.7% (4.5% to 16.2%)     |
| China    | Foreign body in eyes                            | 0 (0 to 0)      | 0 (0 to 0)     | -29.2% (-32.6% to -25.7%) |
| China    | Foreign body in other body part                 | 1 (1 to 3)      | 1 (0 to 1)     | -49.7% (-54.9% to -42.8%) |
| China    | Motor vehicle road injuries                     | 9 (5 to 13)     | 19 (12 to 29)  | 118.8% (107.1% to 131.6%) |
| China    | Motorcyclist road injuries                      | 17 (12 to 23)   | 36 (26 to 49)  | 114.5% (103.8% to 127.7%) |
| China    | Non-venomous animal contact                     | 2 (1 to 4)      | 1 (1 to 3)     | -40.2% (-43% to -37.2%)   |
| China    | Other exposure to mechanical forces             | 12 (6 to 22)    | 17 (9 to 33)   | 50.1% (38.6% to 63.5%)    |
| China    | Other road injuries                             | 2 (1 to 3)      | 3 (1 to 6)     | 91.1% (80.6% to 102.2%)   |
| China    | Other transport injuries                        | 3 (2 to 4)      | 2 (2 to 4)     | -18.1% (-25.2% to -11.4%) |
| China    | Other unintentional injuries                    | 1 (1 to 2)      | 1 (1 to 2)     | -20.9% (-25.3% to -15.2%) |
| China    | Pedestrian road injuries                        | 20 (14 to 27)   | 32 (22 to 43)  | 58.8% (51.3% to 66.3%)    |
| China    | Physical violence by firearm                    | 0 (0 to 1)      | 1 (0 to 1)     | 18.6% (-3.7% to 40.6%)    |
| China    | Physical violence by other means                | 15 (10 to 22)   | 14 (9 to 21)   | -7.4% (-12.3% to -2.7%)   |
| China    | Physical violence by sharp object               | 2 (1 to 5)      | 2 (1 to 3)     | -30.6% (-37.3% to -24.1%) |
| China    | Poisoning by carbon monoxide                    | 0 (0 to 0)      | 0 (0 to 0)     | 38.1% (30.4% to 47.3%)    |
| China    | Poisoning by other means                        | 0 (0 to 0)      | 0 (0 to 0)     | -1% (-6.5% to 4.7%)       |
| China    | Pulmonary aspiration and foreign body in airway | 0 (0 to 0)      | 0 (0 to 0)     | -30.7% (-37.4% to -22%)   |
| China    | Self-harm by firearm                            | 0 (0 to 0)      | 0 (0 to 0)     | -25.7% (-36.3% to -9.8%)  |
| China    | Self-harm by other specified means              | 0 (0 to 1)      | 0 (0 to 0)     | -64.4% (-70.5% to -57.7%) |
| China    | Unintentional firearm injuries                  | 1 (0 to 2)      | 1 (0 to 2)     | -20.3% (-28% to -10.5%)   |
| China    | Venomous animal contact                         | 0 (0 to 1)      | 0 (0 to 0)     | -49.1% (-53.7% to -42.9%) |
| Colombia | Adverse effects of medical treatment            | 0 (0 to 0)      | 0 (0 to 0)     | 0% (0% to 0%)             |
| Colombia | Conflict and terrorism                          | 25 (10 to 56)   | 0 (0 to 0)     | NA                        |
| Colombia | Cyclist road injuries                           | 33 (23 to 45)   | 28 (19 to 38)  | -14.2% (-24.5% to -2.4%)  |
| Colombia | Drowning                                        | 0 (0 to 0)      | 0 (0 to 1)     | 51.8% (33.6% to 71.2%)    |
| Colombia | Environmental heat and cold exposure            | 3 (2 to 4)      | 3 (2 to 4)     | -5.7% (-10.7% to -0.3%)   |
| Colombia | Executions and police conflict                  | 0 (0 to 0)      | 0 (0 to 0)     | NA                        |
| Colombia | Exposure to forces of nature                    | 0 (0 to 0)      | 0 (0 to 0)     | NA                        |
| Colombia | Falls                                           | 106 (82 to 137) | 89 (67 to 119) | -15.9% (-21.6% to -9.8%)  |
| Colombia | Fire, heat, and hot substances                  | 4 (3 to 7)      | 3 (2 to 5)     | -25.9% (-33.9% to -17.7%) |
| Colombia | Foreign body in eyes                            | 0 (0 to 0)      | 0 (0 to 0)     | -0.5% (-1.1% to 0%)       |
| Colombia | Foreign body in other body part                 | 1 (1 to 2)      | 1 (0 to 2)     | -3.5% (-8.6% to 2.5%)     |
| Colombia | Motor vehicle road injuries                     | 52 (39 to 66)   | 37 (27 to 47)  | -29.5% (-37% to -20.2%)   |



|          |                                                 |                |                |                           |
|----------|-------------------------------------------------|----------------|----------------|---------------------------|
| Colombia | Motorcyclist road injuries                      | 17 (13 to 22)  | 34 (27 to 43)  | 104% (79.2% to 133.1%)    |
| Colombia | Non-venomous animal contact                     | 6 (3 to 11)    | 5 (3 to 8)     | -23% (-28.9% to -16.4%)   |
| Colombia | Other exposure to mechanical forces             | 46 (27 to 74)  | 37 (21 to 60)  | -19.9% (-26.6% to -11.9%) |
| Colombia | Other road injuries                             | 9 (5 to 14)    | 7 (4 to 12)    | -13.7% (-24.7% to -0.8%)  |
| Colombia | Other transport injuries                        | 3 (2 to 5)     | 3 (2 to 4)     | -11.2% (-16.2% to -5.8%)  |
| Colombia | Other unintentional injuries                    | 15 (10 to 24)  | 10 (6 to 16)   | -36.6% (-43.7% to -28.9%) |
| Colombia | Pedestrian road injuries                        | 61 (49 to 75)  | 27 (21 to 34)  | -56.2% (-61.1% to -50.4%) |
| Colombia | Physical violence by firearm                    | 12 (8 to 24)   | 8 (6 to 11)    | -32.7% (-65.7% to -5.5%)  |
| Colombia | Physical violence by other means                | 49 (31 to 86)  | 26 (17 to 39)  | -47.2% (-69.3% to -30.8%) |
| Colombia | Physical violence by sharp object               | 25 (15 to 47)  | 13 (8 to 21)   | -47.6% (-70.6% to -27.9%) |
| Colombia | Poisoning by carbon monoxide                    | 0 (0 to 0)     | 0 (0 to 0)     | 29.1% (12.4% to 47.4%)    |
| Colombia | Poisoning by other means                        | 0 (0 to 0)     | 0 (0 to 0)     | -15.8% (-24.8% to -7.3%)  |
| Colombia | Pulmonary aspiration and foreign body in airway | 1 (0 to 1)     | 0 (0 to 1)     | -21.9% (-30.3% to -13.9%) |
| Colombia | Self-harm by firearm                            | 0 (0 to 0)     | 0 (0 to 0)     | 5.7% (-10.2% to 21.3%)    |
| Colombia | Self-harm by other specified means              | 0 (0 to 1)     | 1 (0 to 1)     | 59.9% (45.9% to 77.8%)    |
| Colombia | Unintentional firearm injuries                  | 4 (2 to 6)     | 2 (1 to 4)     | -32.9% (-42.2% to -23.2%) |
| Colombia | Venomous animal contact                         | 9 (4 to 16)    | 6 (3 to 11)    | -30.9% (-36.9% to -25.2%) |
| Comoros  | Adverse effects of medical treatment            | 0 (0 to 0)     | 0 (0 to 0)     | 0% (0% to 0%)             |
| Comoros  | Conflict and terrorism                          | 0 (0 to 0)     | 0 (0 to 0)     | NA                        |
| Comoros  | Cyclist road injuries                           | 39 (25 to 58)  | 45 (29 to 67)  | 17.2% (7.2% to 27.9%)     |
| Comoros  | Drowning                                        | 0 (0 to 0)     | 0 (0 to 0)     | -18.5% (-25.1% to -11.3%) |
| Comoros  | Environmental heat and cold exposure            | 0 (0 to 1)     | 0 (0 to 1)     | -9.8% (-16.5% to -3.2%)   |
| Comoros  | Executions and police conflict                  | 0 (0 to 0)     | 0 (0 to 0)     | NA                        |
| Comoros  | Exposure to forces of nature                    | 0 (0 to 0)     | 0 (0 to 0)     | NA                        |
| Comoros  | Falls                                           | 22 (14 to 34)  | 26 (16 to 41)  | 20.3% (15.3% to 25.1%)    |
| Comoros  | Fire, heat, and hot substances                  | 1 (0 to 1)     | 0 (0 to 1)     | -19.3% (-24.5% to -14.3%) |
| Comoros  | Foreign body in eyes                            | 0 (0 to 0)     | 0 (0 to 0)     | -0.1% (-0.5% to 0.5%)     |
| Comoros  | Foreign body in other body part                 | 3 (1 to 7)     | 3 (1 to 8)     | 6.5% (1% to 13.3%)        |
| Comoros  | Motor vehicle road injuries                     | 85 (59 to 117) | 86 (61 to 117) | 0.6% (-6.8% to 9.5%)      |
| Comoros  | Motorcyclist road injuries                      | 32 (22 to 45)  | 30 (21 to 42)  | -7.4% (-14.5% to 0.1%)    |
| Comoros  | Non-venomous animal contact                     | 7 (3 to 13)    | 6 (3 to 11)    | -16.1% (-21.8% to -10.2%) |
| Comoros  | Other exposure to mechanical forces             | 34 (17 to 63)  | 30 (15 to 54)  | -13.3% (-19.3% to -6.7%)  |
| Comoros  | Other road injuries                             | 2 (1 to 4)     | 2 (1 to 5)     | 23.5% (12.4% to 36.5%)    |
| Comoros  | Other transport injuries                        | 3 (2 to 4)     | 3 (2 to 4)     | -4.5% (-10.7% to 1.7%)    |
| Comoros  | Other unintentional injuries                    | 3 (2 to 5)     | 3 (2 to 5)     | -15.4% (-21.8% to -9.1%)  |
| Comoros  | Pedestrian road injuries                        | 59 (42 to 81)  | 52 (37 to 71)  | -12.7% (-19.2% to -5.1%)  |
| Comoros  | Physical violence by firearm                    | 0 (0 to 0)     | 0 (0 to 0)     | 52.8% (37.2% to 70.6%)    |
| Comoros  | Physical violence by other means                | 9 (6 to 13)    | 11 (7 to 16)   | 23.9% (15.9% to 32.1%)    |
| Comoros  | Physical violence by sharp object               | 2 (1 to 4)     | 3 (1 to 5)     | 24.1% (15.2% to 34.2%)    |
| Comoros  | Poisoning by carbon monoxide                    | 0 (0 to 0)     | 0 (0 to 0)     | 16% (3.5% to 31.4%)       |
| Comoros  | Poisoning by other means                        | 0 (0 to 0)     | 0 (0 to 0)     | -27.1% (-33.8% to -19.3%) |
| Comoros  | Pulmonary aspiration and foreign body in airway | 0 (0 to 0)     | 0 (0 to 0)     | -7.5% (-16.7% to 3.1%)    |
| Comoros  | Self-harm by firearm                            | 0 (0 to 0)     | 0 (0 to 0)     | 19.6% (11.2% to 30.4%)    |

|              |                                                 |               |               |                           |
|--------------|-------------------------------------------------|---------------|---------------|---------------------------|
| Comoros      | Self-harm by other specified means              | 0 (0 to 0)    | 0 (0 to 0)    | 5.9% (0.2% to 11.8%)      |
| Comoros      | Unintentional firearm injuries                  | 1 (0 to 2)    | 1 (0 to 2)    | -17.9% (-25.6% to -8.8%)  |
| Comoros      | Venomous animal contact                         | 1 (0 to 4)    | 1 (0 to 3)    | -31% (-40.1% to -24.2%)   |
| Congo        | Adverse effects of medical treatment            | 0 (0 to 0)    | 0 (0 to 0)    | 0% (0% to 0%)             |
| Congo        | Conflict and terrorism                          | 0 (0 to 0)    | 0 (0 to 0)    | NA                        |
| Congo        | Cyclist road injuries                           | 18 (12 to 25) | 19 (12 to 26) | 3.6% (-4% to 12.6%)       |
| Congo        | Drowning                                        | 0 (0 to 0)    | 0 (0 to 0)    | -28.4% (-35.3% to -21.2%) |
| Congo        | Environmental heat and cold exposure            | 2 (2 to 3)    | 2 (1 to 3)    | -7.3% (-12.6% to -1.5%)   |
| Congo        | Executions and police conflict                  | 0 (0 to 0)    | 0 (0 to 0)    | NA                        |
| Congo        | Exposure to forces of nature                    | 0 (0 to 0)    | 0 (0 to 0)    | NA                        |
| Congo        | Falls                                           | 39 (30 to 49) | 43 (34 to 54) | 11.9% (8.2% to 15.9%)     |
| Congo        | Fire, heat, and hot substances                  | 1 (1 to 2)    | 1 (0 to 1)    | -19.9% (-26.6% to -14.3%) |
| Congo        | Foreign body in eyes                            | 0 (0 to 0)    | 0 (0 to 0)    | 1.4% (0.6% to 2.7%)       |
| Congo        | Foreign body in other body part                 | 3 (2 to 6)    | 3 (2 to 6)    | -2.8% (-8.5% to 3.3%)     |
| Congo        | Motor vehicle road injuries                     | 44 (33 to 57) | 42 (32 to 53) | -5.7% (-12.1% to 1.7%)    |
| Congo        | Motorcyclist road injuries                      | 11 (8 to 15)  | 9 (6 to 11)   | -24.5% (-32% to -17%)     |
| Congo        | Non-venomous animal contact                     | 6 (4 to 10)   | 6 (3 to 9)    | -7.4% (-12.2% to -2.2%)   |
| Congo        | Other exposure to mechanical forces             | 16 (9 to 25)  | 14 (8 to 23)  | -12% (-18% to -6.2%)      |
| Congo        | Other road injuries                             | 1 (1 to 2)    | 1 (1 to 2)    | 6% (-3.9% to 16.8%)       |
| Congo        | Other transport injuries                        | 5 (4 to 7)    | 5 (3 to 6)    | -15.8% (-22.2% to -9.3%)  |
| Congo        | Other unintentional injuries                    | 7 (5 to 11)   | 6 (4 to 10)   | -10.1% (-17.8% to -2.8%)  |
| Congo        | Pedestrian road injuries                        | 47 (36 to 59) | 38 (29 to 47) | -19.2% (-24.4% to -13.7%) |
| Congo        | Physical violence by firearm                    | 0 (0 to 0)    | 0 (0 to 0)    | 2.9% (-7.4% to 14.7%)     |
| Congo        | Physical violence by other means                | 7 (5 to 10)   | 5 (4 to 8)    | -16.7% (-22.3% to -11.3%) |
| Congo        | Physical violence by sharp object               | 3 (2 to 4)    | 2 (1 to 3)    | -16.9% (-23.5% to -9.7%)  |
| Congo        | Poisoning by carbon monoxide                    | 0 (0 to 0)    | 0 (0 to 0)    | 10.9% (-2.1% to 23.5%)    |
| Congo        | Poisoning by other means                        | 0 (0 to 0)    | 0 (0 to 0)    | -21.2% (-28.5% to -13.5%) |
| Congo        | Pulmonary aspiration and foreign body in airway | 0 (0 to 1)    | 0 (0 to 1)    | -24% (-31.4% to -15.4%)   |
| Congo        | Self-harm by firearm                            | 0 (0 to 1)    | 0 (0 to 0)    | -11.9% (-22.3% to 0.1%)   |
| Congo        | Self-harm by other specified means              | 2 (1 to 2)    | 1 (1 to 2)    | -26.6% (-30.6% to -23%)   |
| Congo        | Unintentional firearm injuries                  | 1 (1 to 2)    | 1 (1 to 2)    | -12.4% (-20.1% to -4.4%)  |
| Congo        | Venomous animal contact                         | 1 (0 to 3)    | 1 (0 to 3)    | -3.3% (-10.4% to 4.6%)    |
| Cook Islands | Adverse effects of medical treatment            | 0 (0 to 0)    | 0 (0 to 0)    | 0% (0% to 0%)             |
| Cook Islands | Conflict and terrorism                          | 0 (0 to 0)    | 0 (0 to 0)    | NA                        |
| Cook Islands | Cyclist road injuries                           | 13 (8 to 20)  | 11 (7 to 17)  | -16.6% (-23.6% to -8%)    |
| Cook Islands | Drowning                                        | 0 (0 to 0)    | 0 (0 to 0)    | 19.2% (8% to 30.9%)       |
| Cook Islands | Environmental heat and cold exposure            | 0 (0 to 1)    | 0 (0 to 1)    | 1% (-4.7% to 6.8%)        |
| Cook Islands | Executions and police conflict                  | 0 (0 to 0)    | 0 (0 to 0)    | NA                        |
| Cook Islands | Exposure to forces of nature                    | 18 (10 to 29) | 0 (0 to 0)    | NA                        |
| Cook Islands | Falls                                           | 31 (19 to 48) | 45 (28 to 71) | 47.4% (42% to 52.6%)      |
| Cook Islands | Fire, heat, and hot substances                  | 0 (0 to 1)    | 0 (0 to 1)    | 9.8% (4.4% to 16.5%)      |
| Cook Islands | Foreign body in eyes                            | 0 (0 to 0)    | 0 (0 to 0)    | -2.6% (-4.4% to -1.1%)    |
| Cook Islands | Foreign body in other body part                 | 1 (0 to 2)    | 1 (0 to 2)    | -2.7% (-8.2% to 3.3%)     |

|              |                                                 |                 |                 |                           |
|--------------|-------------------------------------------------|-----------------|-----------------|---------------------------|
| Cook Islands | Motor vehicle road injuries                     | 50 (34 to 69)   | 36 (25 to 51)   | -26.8% (-32.2% to -21%)   |
| Cook Islands | Motorcyclist road injuries                      | 38 (27 to 52)   | 31 (23 to 41)   | -18.5% (-24.5% to -11.3%) |
| Cook Islands | Non-venomous animal contact                     | 2 (1 to 5)      | 2 (1 to 4)      | -16.1% (-20.2% to -11.9%) |
| Cook Islands | Other exposure to mechanical forces             | 18 (8 to 34)    | 18 (8 to 33)    | -0.9% (-5.8% to 3.4%)     |
| Cook Islands | Other road injuries                             | 3 (2 to 6)      | 3 (1 to 5)      | -21.3% (-28.8% to -12.3%) |
| Cook Islands | Other transport injuries                        | 3 (2 to 5)      | 3 (2 to 5)      | -3.3% (-8.5% to 1.9%)     |
| Cook Islands | Other unintentional injuries                    | 2 (1 to 4)      | 2 (1 to 4)      | 4.9% (-1% to 9.6%)        |
| Cook Islands | Pedestrian road injuries                        | 24 (17 to 34)   | 18 (12 to 25)   | -24.9% (-30.8% to -18.4%) |
| Cook Islands | Physical violence by firearm                    | 0 (0 to 0)      | 0 (0 to 0)      | 29.7% (14.4% to 47.3%)    |
| Cook Islands | Physical violence by other means                | 21 (14 to 32)   | 17 (11 to 26)   | -17.5% (-22.8% to -12.4%) |
| Cook Islands | Physical violence by sharp object               | 2 (1 to 4)      | 1 (1 to 3)      | -21.5% (-32.7% to -10.6%) |
| Cook Islands | Poisoning by carbon monoxide                    | 0 (0 to 0)      | 0 (0 to 0)      | 15.7% (5.9% to 27.1%)     |
| Cook Islands | Poisoning by other means                        | 0 (0 to 0)      | 0 (0 to 0)      | -8.3% (-15% to -1.2%)     |
| Cook Islands | Pulmonary aspiration and foreign body in airway | 0 (0 to 0)      | 0 (0 to 0)      | -5.8% (-16.4% to 6.9%)    |
| Cook Islands | Self-harm by firearm                            | 0 (0 to 0)      | 0 (0 to 0)      | -3.7% (-11.1% to 4.7%)    |
| Cook Islands | Self-harm by other specified means              | 0 (0 to 1)      | 0 (0 to 0)      | -23.3% (-29.6% to -16.7%) |
| Cook Islands | Unintentional firearm injuries                  | 1 (0 to 2)      | 1 (0 to 2)      | 3.5% (-6% to 13.6%)       |
| Cook Islands | Venomous animal contact                         | 1 (0 to 2)      | 1 (0 to 2)      | -11.6% (-17.5% to -6.1%)  |
| Costa Rica   | Adverse effects of medical treatment            | 0 (0 to 0)      | 0 (0 to 0)      | 0% (0% to 0%)             |
| Costa Rica   | Conflict and terrorism                          | 0 (0 to 0)      | 0 (0 to 0)      | NA                        |
| Costa Rica   | Cyclist road injuries                           | 29 (21 to 39)   | 20 (14 to 29)   | -29.1% (-39% to -20.3%)   |
| Costa Rica   | Drowning                                        | 0 (0 to 1)      | 0 (0 to 1)      | -6.5% (-15.5% to 3.2%)    |
| Costa Rica   | Environmental heat and cold exposure            | 3 (2 to 4)      | 3 (2 to 4)      | 4.1% (-1% to 9%)          |
| Costa Rica   | Executions and police conflict                  | 0 (0 to 0)      | 0 (0 to 0)      | NA                        |
| Costa Rica   | Exposure to forces of nature                    | 0 (0 to 0)      | 0 (0 to 0)      | NA                        |
| Costa Rica   | Falls                                           | 126 (99 to 162) | 125 (97 to 161) | -1.5% (-5.6% to 2.3%)     |
| Costa Rica   | Fire, heat, and hot substances                  | 4 (2 to 6)      | 3 (2 to 6)      | -5.9% (-13.2% to 0.5%)    |
| Costa Rica   | Foreign body in eyes                            | 0 (0 to 0)      | 0 (0 to 0)      | -1% (-1.7% to -0.4%)      |
| Costa Rica   | Foreign body in other body part                 | 1 (1 to 3)      | 1 (1 to 2)      | -6% (-11.9% to -0.4%)     |
| Costa Rica   | Motor vehicle road injuries                     | 42 (32 to 53)   | 41 (31 to 52)   | -1.6% (-11.3% to 8.6%)    |
| Costa Rica   | Motorcyclist road injuries                      | 14 (11 to 18)   | 19 (15 to 25)   | 38.5% (20.8% to 57.8%)    |
| Costa Rica   | Non-venomous animal contact                     | 6 (4 to 11)     | 5 (3 to 9)      | -18.9% (-23.2% to -14.1%) |
| Costa Rica   | Other exposure to mechanical forces             | 37 (22 to 61)   | 38 (22 to 63)   | 3.3% (-2.9% to 8.9%)      |
| Costa Rica   | Other road injuries                             | 6 (3 to 9)      | 6 (3 to 9)      | 1.2% (-11.1% to 15%)      |
| Costa Rica   | Other transport injuries                        | 4 (3 to 6)      | 5 (4 to 6)      | 18.3% (9.5% to 28.1%)     |
| Costa Rica   | Other unintentional injuries                    | 12 (7 to 20)    | 11 (7 to 19)    | -6.3% (-11.6% to -0.9%)   |
| Costa Rica   | Pedestrian road injuries                        | 34 (27 to 42)   | 29 (23 to 36)   | -14.2% (-23.4% to -4.8%)  |
| Costa Rica   | Physical violence by firearm                    | 1 (1 to 1)      | 4 (3 to 6)      | 297.7% (230% to 384.1%)   |
| Costa Rica   | Physical violence by other means                | 14 (10 to 21)   | 22 (15 to 31)   | 51.3% (33.2% to 68.7%)    |
| Costa Rica   | Physical violence by sharp object               | 5 (3 to 8)      | 8 (5 to 12)     | 50.2% (28.2% to 74.5%)    |
| Costa Rica   | Poisoning by carbon monoxide                    | 0 (0 to 0)      | 0 (0 to 0)      | 13.1% (3.2% to 24.7%)     |
| Costa Rica   | Poisoning by other means                        | 0 (0 to 0)      | 0 (0 to 0)      | -4.1% (-10.6% to 2.3%)    |
| Costa Rica   | Pulmonary aspiration and foreign body in airway | 1 (0 to 1)      | 0 (0 to 1)      | -21.8% (-29.2% to -13.3%) |

|            |                                                 |                  |                  |                           |
|------------|-------------------------------------------------|------------------|------------------|---------------------------|
| Costa Rica | Self-harm by firearm                            | 0 (0 to 0)       | 0 (0 to 0)       | 4.2% (-8.8% to 16.7%)     |
| Costa Rica | Self-harm by other specified means              | 1 (0 to 1)       | 1 (0 to 1)       | 24.9% (15.8% to 35.8%)    |
| Costa Rica | Unintentional firearm injuries                  | 2 (1 to 4)       | 3 (2 to 4)       | 13.2% (3.6% to 23%)       |
| Costa Rica | Venomous animal contact                         | 7 (4 to 14)      | 6 (3 to 12)      | -15.8% (-20% to -11.4%)   |
| Croatia    | Adverse effects of medical treatment            | 0 (0 to 0)       | 0 (0 to 0)       | 0% (0% to 0%)             |
| Croatia    | Conflict and terrorism                          | 0 (0 to 0)       | 0 (0 to 0)       | NA                        |
| Croatia    | Cyclist road injuries                           | 71 (50 to 97)    | 67 (49 to 89)    | -5.6% (-16.3% to 8.2%)    |
| Croatia    | Drowning                                        | 0 (0 to 0)       | 1 (0 to 1)       | 91.8% (69.6% to 117%)     |
| Croatia    | Environmental heat and cold exposure            | 2 (2 to 3)       | 2 (1 to 2)       | -20.2% (-26.3% to -14.9%) |
| Croatia    | Executions and police conflict                  | 0 (0 to 0)       | 0 (0 to 0)       | NA                        |
| Croatia    | Exposure to forces of nature                    | 0 (0 to 0)       | 0 (0 to 0)       | NA                        |
| Croatia    | Falls                                           | 296 (236 to 375) | 400 (318 to 501) | 35.1% (28.7% to 42.2%)    |
| Croatia    | Fire, heat, and hot substances                  | 3 (2 to 5)       | 3 (2 to 5)       | -8.2% (-14.4% to -0.3%)   |
| Croatia    | Foreign body in eyes                            | 0 (0 to 0)       | 0 (0 to 0)       | -0.3% (-5% to 4.5%)       |
| Croatia    | Foreign body in other body part                 | 2 (1 to 4)       | 2 (1 to 4)       | -10.7% (-18.4% to -3.5%)  |
| Croatia    | Motor vehicle road injuries                     | 169 (132 to 212) | 119 (93 to 151)  | -29.9% (-37% to -21.6%)   |
| Croatia    | Motorcyclist road injuries                      | 19 (14 to 25)    | 26 (20 to 34)    | 37.5% (16.2% to 63.1%)    |
| Croatia    | Non-venomous animal contact                     | 4 (2 to 8)       | 4 (2 to 6)       | -20.2% (-28.3% to -11.6%) |
| Croatia    | Other exposure to mechanical forces             | 149 (93 to 231)  | 105 (67 to 163)  | -29.3% (-35.7% to -22.9%) |
| Croatia    | Other road injuries                             | 2 (1 to 3)       | 2 (1 to 3)       | 4.6% (-7.1% to 18.2%)     |
| Croatia    | Other transport injuries                        | 6 (5 to 8)       | 6 (4 to 7)       | -11.9% (-17.2% to -6.4%)  |
| Croatia    | Other unintentional injuries                    | 62 (41 to 97)    | 24 (14 to 39)    | -61.8% (-68.5% to -54.8%) |
| Croatia    | Pedestrian road injuries                        | 81 (63 to 102)   | 48 (36 to 62)    | -40.8% (-48.4% to -32.2%) |
| Croatia    | Physical violence by firearm                    | 1 (1 to 1)       | 1 (0 to 1)       | -38.1% (-53.6% to -21.9%) |
| Croatia    | Physical violence by other means                | 34 (24 to 48)    | 21 (14 to 29)    | -39.9% (-47.9% to -30.9%) |
| Croatia    | Physical violence by sharp object               | 3 (2 to 5)       | 2 (1 to 3)       | -42.2% (-52.1% to -32.3%) |
| Croatia    | Poisoning by carbon monoxide                    | 0 (0 to 0)       | 0 (0 to 0)       | 15% (1.9% to 29.8%)       |
| Croatia    | Poisoning by other means                        | 0 (0 to 1)       | 0 (0 to 1)       | -3.4% (-11.6% to 5.3%)    |
| Croatia    | Pulmonary aspiration and foreign body in airway | 1 (1 to 2)       | 1 (1 to 2)       | 4.6% (-3.3% to 13.2%)     |
| Croatia    | Self-harm by firearm                            | 2 (1 to 3)       | 1 (1 to 2)       | -36.8% (-44.1% to -28.7%) |
| Croatia    | Self-harm by other specified means              | 4 (2 to 6)       | 2 (2 to 4)       | -33.1% (-37.8% to -28.2%) |
| Croatia    | Unintentional firearm injuries                  | 3 (1 to 4)       | 1 (1 to 2)       | -56.1% (-64.3% to -47.6%) |
| Croatia    | Venomous animal contact                         | 4 (2 to 8)       | 3 (1 to 6)       | -24.2% (-32.6% to -15.9%) |
| Cuba       | Adverse effects of medical treatment            | 0 (0 to 0)       | 0 (0 to 0)       | 0% (0% to 0%)             |
| Cuba       | Conflict and terrorism                          | 1 (1 to 3)       | 0 (0 to 0)       | NA                        |
| Cuba       | Cyclist road injuries                           | 67 (52 to 86)    | 33 (25 to 43)    | -50.4% (-57.8% to -41.8%) |
| Cuba       | Drowning                                        | 0 (0 to 1)       | 0 (0 to 1)       | 44.7% (25% to 65.5%)      |
| Cuba       | Environmental heat and cold exposure            | 10 (7 to 14)     | 11 (8 to 16)     | 7.2% (1.2% to 12.7%)      |
| Cuba       | Executions and police conflict                  | 0 (0 to 0)       | 0 (0 to 0)       | NA                        |
| Cuba       | Exposure to forces of nature                    | 0 (0 to 0)       | 0 (0 to 0)       | NA                        |
| Cuba       | Falls                                           | 123 (100 to 154) | 187 (152 to 233) | 51.5% (44.6% to 58.8%)    |
| Cuba       | Fire, heat, and hot substances                  | 4 (2 to 7)       | 5 (3 to 9)       | 32% (20.5% to 44.2%)      |
| Cuba       | Foreign body in eyes                            | 0 (0 to 0)       | 0 (0 to 0)       | -0.1% (-0.5% to 0.1%)     |

|        |                                                 |                  |                  |                           |
|--------|-------------------------------------------------|------------------|------------------|---------------------------|
| Cuba   | Foreign body in other body part                 | 1 (1 to 3)       | 2 (1 to 3)       | 32.8% (25.4% to 40.8%)    |
| Cuba   | Motor vehicle road injuries                     | 27 (20 to 34)    | 18 (13 to 24)    | -31.5% (-41.2% to -20.6%) |
| Cuba   | Motorcyclist road injuries                      | 19 (15 to 24)    | 19 (14 to 24)    | -2.1% (-17% to 14.7%)     |
| Cuba   | Non-venomous animal contact                     | 4 (2 to 6)       | 5 (3 to 8)       | 35.3% (27.6% to 43.4%)    |
| Cuba   | Other exposure to mechanical forces             | 33 (19 to 55)    | 47 (26 to 79)    | 41.5% (30.1% to 52.1%)    |
| Cuba   | Other road injuries                             | 4 (2 to 7)       | 5 (3 to 8)       | 28.6% (10.1% to 51.2%)    |
| Cuba   | Other transport injuries                        | 5 (4 to 7)       | 8 (6 to 11)      | 58.3% (45.4% to 71.8%)    |
| Cuba   | Other unintentional injuries                    | 18 (12 to 29)    | 21 (13 to 34)    | 13.9% (4.7% to 21.5%)     |
| Cuba   | Pedestrian road injuries                        | 23 (18 to 29)    | 13 (10 to 17)    | -43.2% (-50.9% to -34.5%) |
| Cuba   | Physical violence by firearm                    | 1 (0 to 1)       | 1 (1 to 2)       | 65.5% (43.1% to 93.3%)    |
| Cuba   | Physical violence by other means                | 11 (8 to 17)     | 10 (7 to 15)     | -11.1% (-19.9% to -0.7%)  |
| Cuba   | Physical violence by sharp object               | 6 (4 to 9)       | 5 (3 to 8)       | -13.3% (-24.9% to 0.2%)   |
| Cuba   | Poisoning by carbon monoxide                    | 0 (0 to 0)       | 0 (0 to 0)       | 75.2% (59.6% to 95.5%)    |
| Cuba   | Poisoning by other means                        | 0 (0 to 0)       | 0 (0 to 0)       | 64.9% (54.4% to 76%)      |
| Cuba   | Pulmonary aspiration and foreign body in airway | 1 (0 to 1)       | 0 (0 to 1)       | -22.5% (-31% to -13.4%)   |
| Cuba   | Self-harm by firearm                            | 1 (0 to 1)       | 0 (0 to 1)       | -24.7% (-36.1% to -13.7%) |
| Cuba   | Self-harm by other specified means              | 2 (1 to 3)       | 1 (1 to 2)       | -49.8% (-54.5% to -45%)   |
| Cuba   | Unintentional firearm injuries                  | 4 (2 to 6)       | 6 (4 to 10)      | 75.8% (60.4% to 92%)      |
| Cuba   | Venomous animal contact                         | 5 (3 to 10)      | 7 (3 to 13)      | 28.3% (21.2% to 34.9%)    |
| Cyprus | Adverse effects of medical treatment            | 0 (0 to 0)       | 0 (0 to 0)       | 0% (0% to 0%)             |
| Cyprus | Conflict and terrorism                          | 0 (0 to 0)       | 0 (0 to 0)       | NA                        |
| Cyprus | Cyclist road injuries                           | 20 (14 to 27)    | 15 (11 to 20)    | -24.5% (-32.3% to -16.2%) |
| Cyprus | Drowning                                        | 0 (0 to 0)       | 0 (0 to 0)       | 80.6% (65.4% to 95.9%)    |
| Cyprus | Environmental heat and cold exposure            | 2 (2 to 3)       | 2 (2 to 3)       | -7.5% (-12.4% to -2.4%)   |
| Cyprus | Executions and police conflict                  | 0 (0 to 0)       | 0 (0 to 0)       | NA                        |
| Cyprus | Exposure to forces of nature                    | 0 (0 to 0)       | 0 (0 to 0)       | NA                        |
| Cyprus | Falls                                           | 226 (178 to 286) | 281 (220 to 362) | 24.3% (19.5% to 29%)      |
| Cyprus | Fire, heat, and hot substances                  | 2 (1 to 4)       | 2 (1 to 4)       | -9.2% (-15.7% to -3.4%)   |
| Cyprus | Foreign body in eyes                            | 0 (0 to 0)       | 0 (0 to 0)       | -0.5% (-1.2% to -0.2%)    |
| Cyprus | Foreign body in other body part                 | 2 (1 to 3)       | 2 (1 to 3)       | -0.4% (-4.8% to 4.1%)     |
| Cyprus | Motor vehicle road injuries                     | 36 (28 to 46)    | 21 (16 to 27)    | -41.2% (-46.7% to -35.3%) |
| Cyprus | Motorcyclist road injuries                      | 17 (13 to 22)    | 11 (8 to 14)     | -35.2% (-43.7% to -24.9%) |
| Cyprus | Non-venomous animal contact                     | 3 (1 to 4)       | 2 (1 to 4)       | -10.7% (-14.9% to -6.3%)  |
| Cyprus | Other exposure to mechanical forces             | 58 (36 to 91)    | 47 (28 to 74)    | -19.1% (-26.6% to -12.7%) |
| Cyprus | Other road injuries                             | 1 (1 to 2)       | 1 (0 to 1)       | -14.8% (-23.4% to -4.1%)  |
| Cyprus | Other transport injuries                        | 8 (6 to 10)      | 5 (3 to 6)       | -37.6% (-44.7% to -29.8%) |
| Cyprus | Other unintentional injuries                    | 24 (16 to 38)    | 21 (14 to 35)    | -10.8% (-15.9% to -6.1%)  |
| Cyprus | Pedestrian road injuries                        | 10 (7 to 13)     | 5 (4 to 7)       | -44.7% (-51% to -38.1%)   |
| Cyprus | Physical violence by firearm                    | 0 (0 to 1)       | 1 (0 to 1)       | 62.4% (47.2% to 80.1%)    |
| Cyprus | Physical violence by other means                | 21 (15 to 30)    | 17 (12 to 24)    | -18.8% (-24.5% to -12.5%) |
| Cyprus | Physical violence by sharp object               | 2 (1 to 3)       | 1 (1 to 2)       | -12.9% (-22.2% to -3.4%)  |
| Cyprus | Poisoning by carbon monoxide                    | 0 (0 to 0)       | 0 (0 to 0)       | 17.8% (8.3% to 27.3%)     |
| Cyprus | Poisoning by other means                        | 0 (0 to 0)       | 0 (0 to 0)       | -9.5% (-18.1% to -3.5%)   |

|               |                                                 |                  |                  |                           |
|---------------|-------------------------------------------------|------------------|------------------|---------------------------|
| Cyprus        | Pulmonary aspiration and foreign body in airway | 1 (1 to 2)       | 1 (0 to 1)       | -26.7% (-33.6% to -19.2%) |
| Cyprus        | Self-harm by firearm                            | 0 (0 to 0)       | 0 (0 to 0)       | 8.3% (-4.1% to 21.9%)     |
| Cyprus        | Self-harm by other specified means              | 1 (1 to 2)       | 1 (1 to 2)       | 4% (-2.1% to 10.7%)       |
| Cyprus        | Unintentional firearm injuries                  | 1 (1 to 2)       | 1 (1 to 2)       | -22.4% (-32.3% to -12.8%) |
| Cyprus        | Venomous animal contact                         | 1 (0 to 2)       | 1 (0 to 2)       | -11.5% (-17.1% to -5.8%)  |
| Czechia       | Adverse effects of medical treatment            | 0 (0 to 0)       | 0 (0 to 0)       | 0% (0% to 0%)             |
| Czechia       | Conflict and terrorism                          | 0 (0 to 0)       | 0 (0 to 0)       | NA                        |
| Czechia       | Cyclist road injuries                           | 83 (61 to 110)   | 72 (52 to 98)    | -12.9% (-23% to -0.6%)    |
| Czechia       | Drowning                                        | 0 (0 to 0)       | 1 (0 to 1)       | 79% (55.6% to 99.5%)      |
| Czechia       | Environmental heat and cold exposure            | 2 (2 to 3)       | 2 (2 to 3)       | 0.2% (-5.2% to 5.4%)      |
| Czechia       | Executions and police conflict                  | 0 (0 to 0)       | 0 (0 to 0)       | NA                        |
| Czechia       | Exposure to forces of nature                    | 0 (0 to 0)       | 0 (0 to 0)       | NA                        |
| Czechia       | Falls                                           | 403 (327 to 501) | 324 (253 to 416) | -19.6% (-25.9% to -13.2%) |
| Czechia       | Fire, heat, and hot substances                  | 4 (2 to 7)       | 4 (2 to 7)       | -2.3% (-8.8% to 3.2%)     |
| Czechia       | Foreign body in eyes                            | 0 (0 to 0)       | 0 (0 to 0)       | 0.9% (0.4% to 1.8%)       |
| Czechia       | Foreign body in other body part                 | 3 (1 to 5)       | 3 (1 to 5)       | 0.1% (-5.4% to 5.8%)      |
| Czechia       | Motor vehicle road injuries                     | 178 (141 to 220) | 106 (82 to 134)  | -40.8% (-47.8% to -33.1%) |
| Czechia       | Motorcyclist road injuries                      | 27 (20 to 34)    | 25 (18 to 32)    | -7.2% (-20.8% to 7.8%)    |
| Czechia       | Non-venomous animal contact                     | 7 (4 to 12)      | 6 (3 to 10)      | -14% (-18.5% to -9.3%)    |
| Czechia       | Other exposure to mechanical forces             | 158 (99 to 245)  | 143 (88 to 224)  | -9.3% (-14.6% to -3.5%)   |
| Czechia       | Other road injuries                             | 2 (1 to 3)       | 2 (1 to 3)       | -4.6% (-15.8% to 8%)      |
| Czechia       | Other transport injuries                        | 8 (6 to 11)      | 7 (5 to 9)       | -16.1% (-22.2% to -9.3%)  |
| Czechia       | Other unintentional injuries                    | 40 (25 to 62)    | 32 (20 to 53)    | -18.6% (-26.7% to -10.7%) |
| Czechia       | Pedestrian road injuries                        | 35 (26 to 45)    | 30 (22 to 40)    | -14.1% (-24.1% to -3.5%)  |
| Czechia       | Physical violence by firearm                    | 0 (0 to 1)       | 1 (0 to 1)       | 61.2% (42.2% to 83%)      |
| Czechia       | Physical violence by other means                | 33 (23 to 46)    | 31 (21 to 43)    | -7.4% (-16.1% to 1%)      |
| Czechia       | Physical violence by sharp object               | 3 (2 to 5)       | 2 (1 to 4)       | -16.5% (-28.4% to -5.2%)  |
| Czechia       | Poisoning by carbon monoxide                    | 0 (0 to 0)       | 0 (0 to 0)       | 0.1% (-12.8% to 11.8%)    |
| Czechia       | Poisoning by other means                        | 1 (0 to 1)       | 1 (0 to 1)       | -5.1% (-14.5% to 3.5%)    |
| Czechia       | Pulmonary aspiration and foreign body in airway | 1 (1 to 2)       | 1 (1 to 2)       | -27.3% (-35.3% to -19.4%) |
| Czechia       | Self-harm by firearm                            | 1 (0 to 1)       | 1 (0 to 1)       | -4.5% (-16.1% to 10.3%)   |
| Czechia       | Self-harm by other specified means              | 4 (3 to 6)       | 3 (2 to 5)       | -19.8% (-24% to -15%)     |
| Czechia       | Unintentional firearm injuries                  | 1 (1 to 2)       | 1 (1 to 2)       | -2.8% (-11.3% to 6.3%)    |
| Czechia       | Venomous animal contact                         | 5 (2 to 9)       | 4 (2 to 8)       | -16.5% (-21.4% to -11.5%) |
| Côte d'Ivoire | Adverse effects of medical treatment            | 0 (0 to 0)       | 0 (0 to 0)       | 0% (0% to 0%)             |
| Côte d'Ivoire | Conflict and terrorism                          | 0 (0 to 1)       | 0 (0 to 0)       | NA                        |
| Côte d'Ivoire | Cyclist road injuries                           | 28 (18 to 41)    | 31 (19 to 45)    | 9.2% (1.7% to 17.8%)      |
| Côte d'Ivoire | Drowning                                        | 0 (0 to 0)       | 0 (0 to 0)       | -12.2% (-18.9% to -4.2%)  |
| Côte d'Ivoire | Environmental heat and cold exposure            | 0 (0 to 1)       | 0 (0 to 1)       | 1.6% (-3% to 8%)          |
| Côte d'Ivoire | Executions and police conflict                  | 0 (0 to 0)       | 0 (0 to 1)       | NA                        |
| Côte d'Ivoire | Exposure to forces of nature                    | 0 (0 to 0)       | 0 (0 to 0)       | NA                        |
| Côte d'Ivoire | Falls                                           | 20 (13 to 29)    | 21 (14 to 32)    | 7.7% (4.4% to 11.3%)      |
| Côte d'Ivoire | Fire, heat, and hot substances                  | 0 (0 to 0)       | 0 (0 to 0)       | -10.5% (-16% to -4.9%)    |



|                                       |                                                 |               |               |                           |
|---------------------------------------|-------------------------------------------------|---------------|---------------|---------------------------|
| Côte d'Ivoire                         | Foreign body in eyes                            | 0 (0 to 0)    | 0 (0 to 0)    | -0.2% (-0.6% to 0.1%)     |
| Côte d'Ivoire                         | Foreign body in other body part                 | 3 (1 to 7)    | 3 (1 to 8)    | 1.1% (-3.6% to 5.5%)      |
| Côte d'Ivoire                         | Motor vehicle road injuries                     | 54 (38 to 76) | 55 (38 to 76) | 1.7% (-5.6% to 9.5%)      |
| Côte d'Ivoire                         | Motorcyclist road injuries                      | 27 (19 to 36) | 27 (19 to 37) | 0.2% (-7.4% to 8.4%)      |
| Côte d'Ivoire                         | Non-venomous animal contact                     | 3 (1 to 6)    | 3 (1 to 5)    | -8.2% (-13.1% to -3.2%)   |
| Côte d'Ivoire                         | Other exposure to mechanical forces             | 26 (13 to 47) | 24 (12 to 43) | -9.3% (-14.2% to -4.5%)   |
| Côte d'Ivoire                         | Other road injuries                             | 2 (1 to 4)    | 2 (1 to 4)    | 6.1% (-2.5% to 15%)       |
| Côte d'Ivoire                         | Other transport injuries                        | 3 (2 to 4)    | 3 (2 to 4)    | -3.2% (-9.2% to 2.3%)     |
| Côte d'Ivoire                         | Other unintentional injuries                    | 3 (2 to 5)    | 2 (1 to 4)    | -10% (-15.2% to -5.2%)    |
| Côte d'Ivoire                         | Pedestrian road injuries                        | 61 (45 to 80) | 59 (43 to 77) | -3.8% (-10% to 3%)        |
| Côte d'Ivoire                         | Physical violence by firearm                    | 0 (0 to 0)    | 0 (0 to 0)    | 5.7% (-5.8% to 19%)       |
| Côte d'Ivoire                         | Physical violence by other means                | 10 (7 to 15)  | 10 (7 to 15)  | -3.3% (-8.2% to 1.5%)     |
| Côte d'Ivoire                         | Physical violence by sharp object               | 3 (1 to 5)    | 2 (1 to 4)    | -6% (-13% to 0.8%)        |
| Côte d'Ivoire                         | Poisoning by carbon monoxide                    | 0 (0 to 0)    | 0 (0 to 0)    | 6.7% (-2.2% to 16.9%)     |
| Côte d'Ivoire                         | Poisoning by other means                        | 0 (0 to 0)    | 0 (0 to 0)    | -14.5% (-20.9% to -7.3%)  |
| Côte d'Ivoire                         | Pulmonary aspiration and foreign body in airway | 0 (0 to 0)    | 0 (0 to 0)    | -8.9% (-18.3% to 0.4%)    |
| Côte d'Ivoire                         | Self-harm by firearm                            | 0 (0 to 0)    | 0 (0 to 0)    | -0.5% (-7.5% to 6.8%)     |
| Côte d'Ivoire                         | Self-harm by other specified means              | 0 (0 to 0)    | 0 (0 to 0)    | -0.2% (-6.1% to 5.8%)     |
| Côte d'Ivoire                         | Unintentional firearm injuries                  | 1 (0 to 2)    | 1 (0 to 2)    | -10.1% (-17.2% to -2.5%)  |
| Côte d'Ivoire                         | Venomous animal contact                         | 0 (0 to 1)    | 0 (0 to 1)    | -7.9% (-15.1% to -0.9%)   |
| Democratic People's Republic of Korea | Adverse effects of medical treatment            | 0 (0 to 0)    | 0 (0 to 0)    | 0% (0% to 0%)             |
| Democratic People's Republic of Korea | Conflict and terrorism                          | 0 (0 to 0)    | 0 (0 to 0)    | NA                        |
| Democratic People's Republic of Korea | Cyclist road injuries                           | 15 (11 to 21) | 21 (15 to 29) | 39.2% (27.9% to 52%)      |
| Democratic People's Republic of Korea | Drowning                                        | 1 (0 to 1)    | 0 (0 to 1)    | -29.4% (-38.1% to -19.2%) |
| Democratic People's Republic of Korea | Environmental heat and cold exposure            | 2 (1 to 3)    | 2 (1 to 3)    | 4.1% (-1.3% to 9.5%)      |
| Democratic People's Republic of Korea | Executions and police conflict                  | 0 (0 to 0)    | 0 (0 to 0)    | NA                        |
| Democratic People's Republic of Korea | Exposure to forces of nature                    | 0 (0 to 0)    | 0 (0 to 0)    | NA                        |
| Democratic People's Republic of Korea | Falls                                           | 58 (46 to 75) | 36 (28 to 47) | -38.1% (-40.2% to -35.8%) |
| Democratic People's Republic of Korea | Fire, heat, and hot substances                  | 1 (0 to 1)    | 1 (0 to 1)    | -13.8% (-19.6% to -8.5%)  |
| Democratic People's Republic of Korea | Foreign body in eyes                            | 0 (0 to 0)    | 0 (0 to 0)    | 3.9% (2.6% to 5.7%)       |
| Democratic People's Republic of Korea | Foreign body in other body part                 | 0 (0 to 1)    | 0 (0 to 1)    | -3.2% (-9.4% to 3.5%)     |
| Democratic People's Republic of Korea | Motor vehicle road injuries                     | 13 (10 to 18) | 15 (11 to 20) | 16.5% (6.4% to 27.1%)     |
| Democratic People's Republic of Korea | Motorcyclist road injuries                      | 20 (16 to 26) | 29 (23 to 37) | 44.5% (32.3% to 57%)      |
| Democratic People's Republic of Korea | Non-venomous animal contact                     | 2 (1 to 4)    | 2 (1 to 3)    | -14.8% (-19.1% to -9.8%)  |
| Democratic People's Republic of Korea | Other exposure to mechanical forces             | 5 (3 to 9)    | 7 (4 to 12)   | 41.4% (31.8% to 54%)      |
| Democratic People's Republic of Korea | Other road injuries                             | 1 (0 to 2)    | 1 (1 to 2)    | 12.1% (1.5% to 23.9%)     |
| Democratic People's Republic of Korea | Other transport injuries                        | 6 (4 to 8)    | 5 (4 to 7)    | -8.5% (-12.8% to -3.7%)   |
| Democratic People's Republic of Korea | Other unintentional injuries                    | 4 (3 to 6)    | 4 (3 to 7)    | 3.6% (-1.7% to 10.5%)     |
| Democratic People's Republic of Korea | Pedestrian road injuries                        | 14 (10 to 17) | 16 (12 to 20) | 18.4% (9.5% to 28.5%)     |
| Democratic People's Republic of Korea | Physical violence by firearm                    | 0 (0 to 0)    | 0 (0 to 0)    | -1% (-13.3% to 11.9%)     |
| Democratic People's Republic of Korea | Physical violence by other means                | 15 (11 to 22) | 18 (13 to 25) | 16.7% (9.2% to 25.4%)     |
| Democratic People's Republic of Korea | Physical violence by sharp object               | 3 (2 to 5)    | 3 (2 to 5)    | -0.4% (-10.2% to 9.8%)    |
| Democratic People's Republic of Korea | Poisoning by carbon monoxide                    | 0 (0 to 0)    | 0 (0 to 0)    | 15.6% (5.6% to 28.1%)     |

|                                       |                                                 |                  |                  |                           |
|---------------------------------------|-------------------------------------------------|------------------|------------------|---------------------------|
| Democratic People's Republic of Korea | Poisoning by other means                        | 0 (0 to 0)       | 0 (0 to 0)       | -10.1% (-17.1% to -1.3%)  |
| Democratic People's Republic of Korea | Pulmonary aspiration and foreign body in airway | 0 (0 to 0)       | 0 (0 to 0)       | 17.2% (1% to 36.1%)       |
| Democratic People's Republic of Korea | Self-harm by firearm                            | 1 (0 to 1)       | 0 (0 to 1)       | -23.8% (-32% to -13.8%)   |
| Democratic People's Republic of Korea | Self-harm by other specified means              | 2 (1 to 4)       | 1 (1 to 2)       | -40.1% (-44% to -36.2%)   |
| Democratic People's Republic of Korea | Unintentional firearm injuries                  | 1 (1 to 2)       | 1 (1 to 2)       | -6% (-15% to 2.6%)        |
| Democratic People's Republic of Korea | Venomous animal contact                         | 1 (0 to 1)       | 1 (0 to 1)       | -8.4% (-14.4% to -0.8%)   |
| Democratic Republic of the Congo      | Adverse effects of medical treatment            | 0 (0 to 0)       | 0 (0 to 0)       | 0% (0% to 0%)             |
| Democratic Republic of the Congo      | Conflict and terrorism                          | 2 (1 to 7)       | 11 (5 to 26)     | NA                        |
| Democratic Republic of the Congo      | Cyclist road injuries                           | 21 (14 to 30)    | 19 (13 to 27)    | -8.8% (-15% to -2.8%)     |
| Democratic Republic of the Congo      | Drowning                                        | 0 (0 to 0)       | 0 (0 to 0)       | -25.3% (-32.8% to -17.8%) |
| Democratic Republic of the Congo      | Environmental heat and cold exposure            | 2 (1 to 3)       | 2 (1 to 3)       | -2.4% (-7.9% to 3.2%)     |
| Democratic Republic of the Congo      | Executions and police conflict                  | 0 (0 to 0)       | 0 (0 to 1)       | NA                        |
| Democratic Republic of the Congo      | Exposure to forces of nature                    | 0 (0 to 0)       | 0 (0 to 0)       | NA                        |
| Democratic Republic of the Congo      | Falls                                           | 37 (29 to 47)    | 44 (35 to 56)    | 18.9% (14.6% to 23.3%)    |
| Democratic Republic of the Congo      | Fire, heat, and hot substances                  | 1 (1 to 2)       | 1 (0 to 1)       | -9% (-14.5% to -4%)       |
| Democratic Republic of the Congo      | Foreign body in eyes                            | 0 (0 to 0)       | 0 (0 to 0)       | 0% (-1% to 0.9%)          |
| Democratic Republic of the Congo      | Foreign body in other body part                 | 4 (2 to 7)       | 3 (2 to 7)       | -8% (-13.4% to -2.8%)     |
| Democratic Republic of the Congo      | Motor vehicle road injuries                     | 47 (36 to 60)    | 40 (31 to 52)    | -13.9% (-20% to -7.8%)    |
| Democratic Republic of the Congo      | Motorcyclist road injuries                      | 8 (6 to 10)      | 7 (5 to 9)       | -11% (-19.7% to -2.2%)    |
| Democratic Republic of the Congo      | Non-venomous animal contact                     | 7 (4 to 12)      | 8 (5 to 13)      | 5.7% (0.5% to 10.5%)      |
| Democratic Republic of the Congo      | Other exposure to mechanical forces             | 14 (8 to 23)     | 13 (8 to 22)     | -5.8% (-11.3% to -0.9%)   |
| Democratic Republic of the Congo      | Other road injuries                             | 1 (1 to 3)       | 1 (1 to 2)       | -1.8% (-10% to 7.3%)      |
| Democratic Republic of the Congo      | Other transport injuries                        | 5 (4 to 7)       | 5 (4 to 7)       | 2.6% (-3.1% to 8.8%)      |
| Democratic Republic of the Congo      | Other unintentional injuries                    | 7 (5 to 11)      | 7 (4 to 11)      | -3.4% (-9.5% to 3.4%)     |
| Democratic Republic of the Congo      | Pedestrian road injuries                        | 44 (34 to 55)    | 41 (31 to 51)    | -6.5% (-11.9% to -1.1%)   |
| Democratic Republic of the Congo      | Physical violence by firearm                    | 0 (0 to 0)       | 0 (0 to 0)       | 2.3% (-6.8% to 12.9%)     |
| Democratic Republic of the Congo      | Physical violence by other means                | 5 (3 to 7)       | 4 (3 to 6)       | -8.8% (-14.3% to -3.1%)   |
| Democratic Republic of the Congo      | Physical violence by sharp object               | 2 (1 to 3)       | 2 (1 to 3)       | -5.3% (-13.1% to 3.2%)    |
| Democratic Republic of the Congo      | Poisoning by carbon monoxide                    | 0 (0 to 0)       | 0 (0 to 0)       | 7% (-3.8% to 19%)         |
| Democratic Republic of the Congo      | Poisoning by other means                        | 0 (0 to 0)       | 0 (0 to 0)       | -18.1% (-24.6% to -11.5%) |
| Democratic Republic of the Congo      | Pulmonary aspiration and foreign body in airway | 0 (0 to 1)       | 0 (0 to 1)       | -13.9% (-22.2% to -3%)    |
| Democratic Republic of the Congo      | Self-harm by firearm                            | 0 (0 to 0)       | 0 (0 to 0)       | 14.3% (1.6% to 31.3%)     |
| Democratic Republic of the Congo      | Self-harm by other specified means              | 1 (1 to 2)       | 1 (1 to 2)       | 1.4% (-4% to 6.7%)        |
| Democratic Republic of the Congo      | Unintentional firearm injuries                  | 1 (1 to 2)       | 1 (1 to 2)       | -9.6% (-16.2% to -2.4%)   |
| Democratic Republic of the Congo      | Venomous animal contact                         | 1 (0 to 3)       | 2 (0 to 4)       | 11.3% (4% to 20.1%)       |
| Denmark                               | Adverse effects of medical treatment            | 0 (0 to 0)       | 0 (0 to 0)       | 0% (0% to 0%)             |
| Denmark                               | Conflict and terrorism                          | 0 (0 to 0)       | 0 (0 to 0)       | NA                        |
| Denmark                               | Cyclist road injuries                           | 37 (28 to 48)    | 19 (13 to 25)    | -49% (-57.1% to -41.2%)   |
| Denmark                               | Drowning                                        | 0 (0 to 0)       | 0 (0 to 0)       | 72.2% (56.3% to 89.4%)    |
| Denmark                               | Environmental heat and cold exposure            | 2 (1 to 3)       | 2 (1 to 3)       | 1.3% (-2.4% to 5.4%)      |
| Denmark                               | Executions and police conflict                  | 0 (0 to 0)       | 0 (0 to 0)       | NA                        |
| Denmark                               | Exposure to forces of nature                    | 0 (0 to 0)       | 0 (0 to 0)       | NA                        |
| Denmark                               | Falls                                           | 306 (246 to 379) | 259 (198 to 333) | -15.3% (-21.6% to -8.4%)  |

|          |                                                 |                |               |                           |
|----------|-------------------------------------------------|----------------|---------------|---------------------------|
| Denmark  | Fire, heat, and hot substances                  | 3 (2 to 4)     | 2 (1 to 4)    | -13.7% (-19.1% to -8.2%)  |
| Denmark  | Foreign body in eyes                            | 0 (0 to 0)     | 0 (0 to 0)    | 0.4% (0.1% to 0.9%)       |
| Denmark  | Foreign body in other body part                 | 2 (1 to 3)     | 2 (1 to 3)    | 0.8% (-3.7% to 5.7%)      |
| Denmark  | Motor vehicle road injuries                     | 34 (27 to 43)  | 18 (14 to 24) | -46.6% (-54.6% to -38.7%) |
| Denmark  | Motorcyclist road injuries                      | 9 (7 to 12)    | 7 (5 to 10)   | -22.1% (-35% to -6.9%)    |
| Denmark  | Non-venomous animal contact                     | 2 (1 to 4)     | 2 (1 to 4)    | -4.7% (-8.5% to -0.3%)    |
| Denmark  | Other exposure to mechanical forces             | 47 (29 to 74)  | 44 (26 to 70) | -7.2% (-14.4% to -0.9%)   |
| Denmark  | Other road injuries                             | 1 (1 to 2)     | 1 (1 to 2)    | -4.2% (-18.5% to 11.7%)   |
| Denmark  | Other transport injuries                        | 5 (4 to 7)     | 5 (3 to 6)    | -14.8% (-22.2% to -7%)    |
| Denmark  | Other unintentional injuries                    | 28 (18 to 43)  | 22 (14 to 36) | -21.3% (-29.2% to -14.8%) |
| Denmark  | Pedestrian road injuries                        | 8 (6 to 11)    | 6 (4 to 8)    | -26.8% (-39.3% to -13%)   |
| Denmark  | Physical violence by firearm                    | 0 (0 to 1)     | 1 (0 to 1)    | 36.1% (21.1% to 52.9%)    |
| Denmark  | Physical violence by other means                | 17 (12 to 24)  | 13 (9 to 20)  | -19.9% (-27.7% to -12%)   |
| Denmark  | Physical violence by sharp object               | 2 (1 to 3)     | 1 (1 to 2)    | -13.8% (-25.4% to -3.6%)  |
| Denmark  | Poisoning by carbon monoxide                    | 0 (0 to 0)     | 0 (0 to 0)    | 17.3% (7.5% to 28.2%)     |
| Denmark  | Poisoning by other means                        | 0 (0 to 0)     | 0 (0 to 0)    | -1.3% (-7.3% to 5.4%)     |
| Denmark  | Pulmonary aspiration and foreign body in airway | 1 (1 to 2)     | 1 (0 to 2)    | -5% (-13.8% to 4%)        |
| Denmark  | Self-harm by firearm                            | 1 (0 to 1)     | 0 (0 to 1)    | -50.8% (-57.9% to -42.9%) |
| Denmark  | Self-harm by other specified means              | 5 (3 to 7)     | 2 (1 to 3)    | -53.6% (-56.7% to -50.4%) |
| Denmark  | Unintentional firearm injuries                  | 1 (1 to 2)     | 1 (1 to 2)    | 3.5% (-7.1% to 14%)       |
| Denmark  | Venomous animal contact                         | 1 (0 to 2)     | 1 (0 to 2)    | -6.6% (-11.7% to -1.5%)   |
| Djibouti | Adverse effects of medical treatment            | 0 (0 to 0)     | 0 (0 to 0)    | 0% (0% to 0%)             |
| Djibouti | Conflict and terrorism                          | 55 (17 to 139) | 0 (0 to 0)    | NA                        |
| Djibouti | Cyclist road injuries                           | 31 (20 to 47)  | 34 (22 to 50) | 9.3% (1.5% to 17.2%)      |
| Djibouti | Drowning                                        | 0 (0 to 0)     | 0 (0 to 0)    | -9.6% (-16.6% to -2.1%)   |
| Djibouti | Environmental heat and cold exposure            | 0 (0 to 1)     | 0 (0 to 1)    | -6.4% (-13.3% to -0.1%)   |
| Djibouti | Executions and police conflict                  | 0 (0 to 0)     | 1 (0 to 2)    | NA                        |
| Djibouti | Exposure to forces of nature                    | 0 (0 to 0)     | 0 (0 to 0)    | NA                        |
| Djibouti | Falls                                           | 23 (15 to 36)  | 27 (18 to 43) | 18.5% (13.8% to 24%)      |
| Djibouti | Fire, heat, and hot substances                  | 0 (0 to 1)     | 0 (0 to 1)    | -15.3% (-20.7% to -10.4%) |
| Djibouti | Foreign body in eyes                            | 0 (0 to 0)     | 0 (0 to 0)    | 0.4% (-0.1% to 1.1%)      |
| Djibouti | Foreign body in other body part                 | 3 (1 to 7)     | 3 (1 to 7)    | 4.5% (-1.4% to 10.6%)     |
| Djibouti | Motor vehicle road injuries                     | 49 (33 to 69)  | 46 (30 to 64) | -7% (-13.6% to 0.5%)      |
| Djibouti | Motorcyclist road injuries                      | 20 (14 to 28)  | 23 (16 to 32) | 15.9% (7.3% to 24.8%)     |
| Djibouti | Non-venomous animal contact                     | 5 (2 to 10)    | 5 (2 to 10)   | -4% (-8.6% to 0.9%)       |
| Djibouti | Other exposure to mechanical forces             | 33 (17 to 58)  | 29 (15 to 53) | -10.8% (-16% to -5.5%)    |
| Djibouti | Other road injuries                             | 1 (1 to 3)     | 2 (1 to 3)    | 10.1% (0.8% to 19.5%)     |
| Djibouti | Other transport injuries                        | 3 (2 to 4)     | 3 (2 to 4)    | -3.5% (-8.8% to 2%)       |
| Djibouti | Other unintentional injuries                    | 3 (2 to 5)     | 2 (1 to 4)    | -12.6% (-17.8% to -6.2%)  |
| Djibouti | Pedestrian road injuries                        | 74 (54 to 96)  | 63 (47 to 83) | -14.4% (-19.7% to -8.5%)  |
| Djibouti | Physical violence by firearm                    | 0 (0 to 0)     | 0 (0 to 0)    | 42.3% (26.9% to 61.9%)    |
| Djibouti | Physical violence by other means                | 10 (7 to 16)   | 10 (7 to 16)  | -0.3% (-6.6% to 7%)       |
| Djibouti | Physical violence by sharp object               | 3 (1 to 5)     | 3 (1 to 5)    | 3.5% (-4.9% to 12.3%)     |

|                    |                                                 |               |               |                           |
|--------------------|-------------------------------------------------|---------------|---------------|---------------------------|
| Djibouti           | Poisoning by carbon monoxide                    | 0 (0 to 0)    | 0 (0 to 0)    | 13.6% (1.9% to 26.9%)     |
| Djibouti           | Poisoning by other means                        | 0 (0 to 0)    | 0 (0 to 0)    | -19.9% (-26.7% to -12.1%) |
| Djibouti           | Pulmonary aspiration and foreign body in airway | 0 (0 to 0)    | 0 (0 to 0)    | -11.3% (-20.3% to -0.4%)  |
| Djibouti           | Self-harm by firearm                            | 0 (0 to 0)    | 0 (0 to 0)    | 32.1% (22.1% to 45.2%)    |
| Djibouti           | Self-harm by other specified means              | 0 (0 to 0)    | 0 (0 to 0)    | 10.9% (4.7% to 17.7%)     |
| Djibouti           | Unintentional firearm injuries                  | 1 (0 to 2)    | 1 (0 to 2)    | -18.7% (-25.5% to -10.9%) |
| Djibouti           | Venomous animal contact                         | 1 (0 to 3)    | 1 (0 to 2)    | -9.3% (-16.1% to -3.2%)   |
| Dominica           | Adverse effects of medical treatment            | 0 (0 to 0)    | 0 (0 to 0)    | 0% (0% to 0%)             |
| Dominica           | Conflict and terrorism                          | 0 (0 to 0)    | 0 (0 to 0)    | NA                        |
| Dominica           | Cyclist road injuries                           | 31 (22 to 43) | 28 (19 to 38) | -11.3% (-19.5% to -3.3%)  |
| Dominica           | Drowning                                        | 0 (0 to 1)    | 0 (0 to 1)    | 5.7% (-3.1% to 14.9%)     |
| Dominica           | Environmental heat and cold exposure            | 11 (8 to 15)  | 11 (8 to 16)  | 4.6% (0.6% to 9.5%)       |
| Dominica           | Executions and police conflict                  | 0 (0 to 0)    | 0 (0 to 0)    | NA                        |
| Dominica           | Exposure to forces of nature                    | 0 (0 to 0)    | 0 (0 to 0)    | NA                        |
| Dominica           | Falls                                           | 44 (34 to 57) | 58 (45 to 75) | 32.8% (27.3% to 37.6%)    |
| Dominica           | Fire, heat, and hot substances                  | 4 (3 to 7)    | 4 (2 to 6)    | -6.6% (-11% to -2.1%)     |
| Dominica           | Foreign body in eyes                            | 0 (0 to 0)    | 0 (0 to 0)    | 1.7% (0.6% to 3.5%)       |
| Dominica           | Foreign body in other body part                 | 1 (1 to 3)    | 1 (1 to 3)    | -2.8% (-7.8% to 4.1%)     |
| Dominica           | Motor vehicle road injuries                     | 33 (25 to 44) | 30 (22 to 39) | -11.7% (-20.4% to -2.3%)  |
| Dominica           | Motorcyclist road injuries                      | 22 (17 to 29) | 26 (20 to 34) | 19.4% (6.3% to 33.2%)     |
| Dominica           | Non-venomous animal contact                     | 3 (2 to 6)    | 3 (2 to 5)    | -11.9% (-17% to -6%)      |
| Dominica           | Other exposure to mechanical forces             | 30 (18 to 50) | 36 (21 to 59) | 18.1% (11.6% to 25%)      |
| Dominica           | Other road injuries                             | 4 (2 to 7)    | 4 (2 to 6)    | -7.1% (-15.5% to 2.1%)    |
| Dominica           | Other transport injuries                        | 4 (3 to 6)    | 5 (3 to 6)    | 4.1% (-2.7% to 11.5%)     |
| Dominica           | Other unintentional injuries                    | 15 (9 to 23)  | 14 (9 to 23)  | -2.4% (-8% to 3.3%)       |
| Dominica           | Pedestrian road injuries                        | 19 (14 to 24) | 15 (11 to 19) | -21.7% (-28.8% to -14.8%) |
| Dominica           | Physical violence by firearm                    | 1 (0 to 1)    | 1 (1 to 2)    | 97.2% (75.5% to 126.1%)   |
| Dominica           | Physical violence by other means                | 10 (7 to 15)  | 13 (9 to 19)  | 32.4% (23.8% to 43.7%)    |
| Dominica           | Physical violence by sharp object               | 4 (3 to 6)    | 6 (4 to 9)    | 42.5% (29% to 60.2%)      |
| Dominica           | Poisoning by carbon monoxide                    | 0 (0 to 0)    | 0 (0 to 0)    | 2.3% (-11.1% to 17%)      |
| Dominica           | Poisoning by other means                        | 0 (0 to 1)    | 0 (0 to 0)    | -55.4% (-61.2% to -48.9%) |
| Dominica           | Pulmonary aspiration and foreign body in airway | 0 (0 to 1)    | 0 (0 to 1)    | -16.1% (-24.8% to -8%)    |
| Dominica           | Self-harm by firearm                            | 0 (0 to 0)    | 0 (0 to 0)    | 9.1% (-2.9% to 22.7%)     |
| Dominica           | Self-harm by other specified means              | 0 (0 to 1)    | 0 (0 to 1)    | -0.7% (-7.8% to 6.5%)     |
| Dominica           | Unintentional firearm injuries                  | 4 (2 to 6)    | 4 (2 to 6)    | 13.1% (3.1% to 23.8%)     |
| Dominica           | Venomous animal contact                         | 5 (3 to 10)   | 5 (2 to 9)    | -11.3% (-15.9% to -6.3%)  |
| Dominican Republic | Adverse effects of medical treatment            | 0 (0 to 0)    | 0 (0 to 0)    | 0% (0% to 0%)             |
| Dominican Republic | Conflict and terrorism                          | 0 (0 to 1)    | 0 (0 to 0)    | NA                        |
| Dominican Republic | Cyclist road injuries                           | 31 (22 to 43) | 29 (20 to 41) | -5.8% (-16.5% to 4.7%)    |
| Dominican Republic | Drowning                                        | 0 (0 to 0)    | 0 (0 to 1)    | 46.8% (30.6% to 65.9%)    |
| Dominican Republic | Environmental heat and cold exposure            | 10 (7 to 15)  | 11 (8 to 16)  | 7.7% (3.4% to 12%)        |
| Dominican Republic | Executions and police conflict                  | 0 (0 to 0)    | 0 (0 to 0)    | NA                        |
| Dominican Republic | Exposure to forces of nature                    | 0 (0 to 0)    | 0 (0 to 0)    | NA                        |

|                    |                                                 |                |                 |                           |
|--------------------|-------------------------------------------------|----------------|-----------------|---------------------------|
| Dominican Republic | Falls                                           | 38 (30 to 49)  | 61 (47 to 80)   | 60.8% (55.3% to 66.6%)    |
| Dominican Republic | Fire, heat, and hot substances                  | 3 (2 to 6)     | 4 (2 to 6)      | 4.5% (-0.5% to 9.5%)      |
| Dominican Republic | Foreign body in eyes                            | 0 (0 to 0)     | 0 (0 to 0)      | 0.6% (0.1% to 1.3%)       |
| Dominican Republic | Foreign body in other body part                 | 1 (1 to 3)     | 1 (1 to 3)      | -4.9% (-10.4% to 1.1%)    |
| Dominican Republic | Motor vehicle road injuries                     | 48 (37 to 62)  | 67 (51 to 84)   | 38.5% (24% to 54.6%)      |
| Dominican Republic | Motorcyclist road injuries                      | 18 (14 to 24)  | 35 (27 to 46)   | 91.1% (68.6% to 119.8%)   |
| Dominican Republic | Non-venomous animal contact                     | 3 (2 to 6)     | 3 (2 to 5)      | -17.1% (-21.3% to -12.2%) |
| Dominican Republic | Other exposure to mechanical forces             | 30 (17 to 50)  | 40 (23 to 68)   | 36.2% (28.4% to 44.9%)    |
| Dominican Republic | Other road injuries                             | 4 (3 to 7)     | 4 (2 to 7)      | -0.7% (-12.3% to 11.7%)   |
| Dominican Republic | Other transport injuries                        | 5 (3 to 6)     | 5 (3 to 6)      | 1.1% (-4.7% to 7%)        |
| Dominican Republic | Other unintentional injuries                    | 17 (11 to 27)  | 18 (12 to 28)   | 3.1% (-3.6% to 11%)       |
| Dominican Republic | Pedestrian road injuries                        | 15 (11 to 19)  | 15 (11 to 19)   | 2.6% (-7.8% to 14.5%)     |
| Dominican Republic | Physical violence by firearm                    | 1 (1 to 1)     | 3 (2 to 5)      | 329% (264.4% to 405.6%)   |
| Dominican Republic | Physical violence by other means                | 11 (8 to 17)   | 17 (12 to 25)   | 48.7% (33.5% to 63.4%)    |
| Dominican Republic | Physical violence by sharp object               | 5 (3 to 7)     | 8 (5 to 12)     | 69.3% (48.7% to 93.2%)    |
| Dominican Republic | Poisoning by carbon monoxide                    | 0 (0 to 0)     | 0 (0 to 0)      | 34.4% (20.1% to 50.5%)    |
| Dominican Republic | Poisoning by other means                        | 0 (0 to 0)     | 0 (0 to 0)      | 11.5% (3.5% to 18.8%)     |
| Dominican Republic | Pulmonary aspiration and foreign body in airway | 0 (0 to 1)     | 0 (0 to 1)      | -26.8% (-35% to -18.9%)   |
| Dominican Republic | Self-harm by firearm                            | 0 (0 to 0)     | 0 (0 to 1)      | 84% (64.8% to 106.5%)     |
| Dominican Republic | Self-harm by other specified means              | 0 (0 to 1)     | 0 (0 to 1)      | 39.7% (29.7% to 50.7%)    |
| Dominican Republic | Unintentional firearm injuries                  | 5 (3 to 7)     | 7 (4 to 11)     | 54.9% (42.1% to 71.5%)    |
| Dominican Republic | Venomous animal contact                         | 6 (3 to 10)    | 5 (2 to 9)      | -15.8% (-19.8% to -10.8%) |
| Ecuador            | Adverse effects of medical treatment            | 0 (0 to 0)     | 0 (0 to 0)      | 0% (0% to 0%)             |
| Ecuador            | Conflict and terrorism                          | 0 (0 to 1)     | 0 (0 to 0)      | NA                        |
| Ecuador            | Cyclist road injuries                           | 14 (9 to 19)   | 15 (10 to 20)   | 6.3% (-3.2% to 17.5%)     |
| Ecuador            | Drowning                                        | 0 (0 to 0)     | 0 (0 to 1)      | 17.5% (3.6% to 32.9%)     |
| Ecuador            | Environmental heat and cold exposure            | 8 (6 to 11)    | 8 (6 to 12)     | 6% (1.9% to 11.6%)        |
| Ecuador            | Executions and police conflict                  | 0 (0 to 0)     | 0 (0 to 0)      | NA                        |
| Ecuador            | Exposure to forces of nature                    | 0 (0 to 0)     | 0 (0 to 0)      | NA                        |
| Ecuador            | Falls                                           | 80 (63 to 103) | 109 (85 to 140) | 36.2% (30.5% to 42.2%)    |
| Ecuador            | Fire, heat, and hot substances                  | 3 (2 to 5)     | 3 (2 to 5)      | -6.3% (-12.7% to -0.1%)   |
| Ecuador            | Foreign body in eyes                            | 0 (0 to 0)     | 0 (0 to 0)      | -0.2% (-0.7% to 0.1%)     |
| Ecuador            | Foreign body in other body part                 | 2 (1 to 5)     | 2 (1 to 5)      | -8.5% (-16.5% to -0.4%)   |
| Ecuador            | Motor vehicle road injuries                     | 17 (12 to 22)  | 21 (16 to 28)   | 29.2% (16.9% to 44.8%)    |
| Ecuador            | Motorcyclist road injuries                      | 7 (5 to 9)     | 15 (11 to 19)   | 119.9% (91.5% to 153%)    |
| Ecuador            | Non-venomous animal contact                     | 3 (2 to 6)     | 3 (2 to 5)      | -8.3% (-13.4% to -2.7%)   |
| Ecuador            | Other exposure to mechanical forces             | 32 (19 to 51)  | 31 (18 to 50)   | -2.6% (-9.9% to 4.6%)     |
| Ecuador            | Other road injuries                             | 3 (2 to 5)     | 3 (2 to 5)      | 2.2% (-8.4% to 15.7%)     |
| Ecuador            | Other transport injuries                        | 4 (3 to 5)     | 5 (4 to 6)      | 26.6% (15.6% to 40.3%)    |
| Ecuador            | Other unintentional injuries                    | 21 (14 to 32)  | 16 (11 to 26)   | -20.7% (-27% to -14.5%)   |
| Ecuador            | Pedestrian road injuries                        | 32 (25 to 39)  | 22 (17 to 27)   | -31.2% (-36.8% to -24.8%) |
| Ecuador            | Physical violence by firearm                    | 1 (1 to 1)     | 1 (1 to 2)      | 35.3% (12.9% to 62.4%)    |
| Ecuador            | Physical violence by other means                | 12 (8 to 17)   | 12 (8 to 18)    | 2.4% (-9.1% to 15.1%)     |

|             |                                                 |                 |               |                           |
|-------------|-------------------------------------------------|-----------------|---------------|---------------------------|
| Ecuador     | Physical violence by sharp object               | 5 (4 to 8)      | 4 (3 to 7)    | -20.7% (-32.2% to -9.2%)  |
| Ecuador     | Poisoning by carbon monoxide                    | 0 (0 to 0)      | 0 (0 to 0)    | 47.4% (28.9% to 66.5%)    |
| Ecuador     | Poisoning by other means                        | 0 (0 to 0)      | 0 (0 to 0)    | -5.2% (-12.2% to 2.6%)    |
| Ecuador     | Pulmonary aspiration and foreign body in airway | 1 (0 to 1)      | 1 (0 to 1)    | -27.7% (-36.2% to -20.1%) |
| Ecuador     | Self-harm by firearm                            | 0 (0 to 0)      | 0 (0 to 0)    | 54.6% (28.6% to 79.2%)    |
| Ecuador     | Self-harm by other specified means              | 0 (0 to 1)      | 1 (1 to 1)    | 100.3% (82.7% to 119.6%)  |
| Ecuador     | Unintentional firearm injuries                  | 3 (2 to 5)      | 3 (2 to 5)    | -12.6% (-21.8% to -2.5%)  |
| Ecuador     | Venomous animal contact                         | 6 (3 to 10)     | 5 (3 to 10)   | -3.2% (-7.6% to 2.2%)     |
| Egypt       | Adverse effects of medical treatment            | 0 (0 to 0)      | 0 (0 to 0)    | 0% (0% to 0%)             |
| Egypt       | Conflict and terrorism                          | 0 (0 to 1)      | 4 (2 to 9)    | NA                        |
| Egypt       | Cyclist road injuries                           | 14 (9 to 20)    | 14 (9 to 20)  | -2.8% (-12.3% to 8.5%)    |
| Egypt       | Drowning                                        | 0 (0 to 0)      | 0 (0 to 0)    | 42.6% (18.8% to 69.5%)    |
| Egypt       | Environmental heat and cold exposure            | 3 (2 to 4)      | 3 (2 to 4)    | -2% (-7.8% to 3.8%)       |
| Egypt       | Executions and police conflict                  | 0 (0 to 0)      | 0 (0 to 0)    | NA                        |
| Egypt       | Exposure to forces of nature                    | 0 (0 to 0)      | 0 (0 to 0)    | NA                        |
| Egypt       | Falls                                           | 48 (36 to 63)   | 68 (52 to 91) | 43.1% (37.5% to 49%)      |
| Egypt       | Fire, heat, and hot substances                  | 1 (0 to 1)      | 1 (0 to 1)    | -15.3% (-22.7% to -7.5%)  |
| Egypt       | Foreign body in eyes                            | 0 (0 to 0)      | 0 (0 to 0)    | 1.5% (0.6% to 2.9%)       |
| Egypt       | Foreign body in other body part                 | 1 (1 to 3)      | 1 (1 to 3)    | 0.2% (-5.4% to 5.6%)      |
| Egypt       | Motor vehicle road injuries                     | 45 (35 to 57)   | 39 (30 to 49) | -14.2% (-21.5% to -6.7%)  |
| Egypt       | Motorcyclist road injuries                      | 12 (9 to 15)    | 13 (10 to 17) | 10% (-1.1% to 22%)        |
| Egypt       | Non-venomous animal contact                     | 3 (2 to 6)      | 3 (2 to 5)    | -6.6% (-12% to -0.6%)     |
| Egypt       | Other exposure to mechanical forces             | 17 (10 to 27)   | 18 (11 to 30) | 10.2% (5% to 15.8%)       |
| Egypt       | Other road injuries                             | 2 (1 to 3)      | 2 (1 to 3)    | 4.2% (-7.8% to 16.6%)     |
| Egypt       | Other transport injuries                        | 8 (6 to 10)     | 5 (4 to 7)    | -31.8% (-37.8% to -24.9%) |
| Egypt       | Other unintentional injuries                    | 15 (10 to 24)   | 14 (9 to 23)  | -7.2% (-13.2% to -0.7%)   |
| Egypt       | Pedestrian road injuries                        | 34 (26 to 43)   | 29 (23 to 37) | -13.3% (-21.3% to -5.2%)  |
| Egypt       | Physical violence by firearm                    | 0 (0 to 0)      | 0 (0 to 1)    | 113.8% (84.5% to 145.9%)  |
| Egypt       | Physical violence by other means                | 9 (6 to 13)     | 9 (6 to 13)   | -0.5% (-5.9% to 5.3%)     |
| Egypt       | Physical violence by sharp object               | 1 (1 to 2)      | 1 (1 to 2)    | -8.6% (-15.8% to -0.8%)   |
| Egypt       | Poisoning by carbon monoxide                    | 0 (0 to 0)      | 0 (0 to 0)    | 51.7% (34.4% to 71.7%)    |
| Egypt       | Poisoning by other means                        | 0 (0 to 0)      | 0 (0 to 0)    | -4.9% (-13.8% to 5.1%)    |
| Egypt       | Pulmonary aspiration and foreign body in airway | 0 (0 to 1)      | 0 (0 to 1)    | -19.7% (-27.6% to -10.6%) |
| Egypt       | Self-harm by firearm                            | 0 (0 to 0)      | 0 (0 to 0)    | 52.8% (38.5% to 70.3%)    |
| Egypt       | Self-harm by other specified means              | 1 (0 to 1)      | 1 (1 to 1)    | 11% (4.5% to 18.4%)       |
| Egypt       | Unintentional firearm injuries                  | 2 (1 to 3)      | 2 (1 to 2)    | -11.7% (-19.5% to -4%)    |
| Egypt       | Venomous animal contact                         | 2 (1 to 4)      | 2 (1 to 4)    | -17.7% (-26.3% to -11.3%) |
| El Salvador | Adverse effects of medical treatment            | 0 (0 to 0)      | 0 (0 to 0)    | 0% (0% to 0%)             |
| El Salvador | Conflict and terrorism                          | 131 (53 to 301) | 0 (0 to 0)    | NA                        |
| El Salvador | Cyclist road injuries                           | 25 (17 to 35)   | 19 (13 to 26) | -26.4% (-35.3% to -17.1%) |
| El Salvador | Drowning                                        | 0 (0 to 0)      | 0 (0 to 1)    | 48.6% (33.7% to 66%)      |
| El Salvador | Environmental heat and cold exposure            | 3 (2 to 4)      | 3 (2 to 4)    | 2.2% (-2.6% to 6.4%)      |
| El Salvador | Executions and police conflict                  | 0 (0 to 0)      | 0 (0 to 0)    | NA                        |



|                   |                                                 |                |                 |                           |
|-------------------|-------------------------------------------------|----------------|-----------------|---------------------------|
| El Salvador       | Exposure to forces of nature                    | 0 (0 to 0)     | 0 (0 to 0)      | NA                        |
| El Salvador       | Falls                                           | 91 (71 to 118) | 109 (84 to 141) | 20.2% (15.5% to 25.3%)    |
| El Salvador       | Fire, heat, and hot substances                  | 4 (2 to 6)     | 3 (2 to 5)      | -15% (-23.5% to -7.7%)    |
| El Salvador       | Foreign body in eyes                            | 0 (0 to 0)     | 0 (0 to 0)      | -1.4% (-2.7% to -0.6%)    |
| El Salvador       | Foreign body in other body part                 | 1 (1 to 3)     | 1 (0 to 2)      | -11.3% (-15.9% to -5.6%)  |
| El Salvador       | Motor vehicle road injuries                     | 46 (35 to 58)  | 39 (30 to 50)   | -15.2% (-22.6% to -7.3%)  |
| El Salvador       | Motorcyclist road injuries                      | 8 (6 to 10)    | 8 (6 to 11)     | 7.3% (-3.7% to 19.5%)     |
| El Salvador       | Non-venomous animal contact                     | 6 (3 to 11)    | 5 (3 to 9)      | -20.7% (-24.9% to -16.3%) |
| El Salvador       | Other exposure to mechanical forces             | 30 (17 to 50)  | 33 (18 to 54)   | 6.7% (-1.1% to 14.5%)     |
| El Salvador       | Other road injuries                             | 6 (4 to 10)    | 5 (3 to 7)      | -23.5% (-31.6% to -14.7%) |
| El Salvador       | Other transport injuries                        | 9 (7 to 12)    | 6 (5 to 7)      | -38% (-42% to -33.7%)     |
| El Salvador       | Other unintentional injuries                    | 13 (8 to 21)   | 8 (5 to 14)     | -35.3% (-43.5% to -27%)   |
| El Salvador       | Pedestrian road injuries                        | 40 (31 to 49)  | 27 (21 to 34)   | -31.6% (-38.1% to -24.9%) |
| El Salvador       | Physical violence by firearm                    | 5 (3 to 7)     | 15 (10 to 20)   | 200.7% (156.9% to 257.3%) |
| El Salvador       | Physical violence by other means                | 41 (29 to 58)  | 60 (41 to 86)   | 47.2% (32.7% to 65.5%)    |
| El Salvador       | Physical violence by sharp object               | 13 (9 to 19)   | 17 (10 to 26)   | 29.1% (12.9% to 49.4%)    |
| El Salvador       | Poisoning by carbon monoxide                    | 0 (0 to 0)     | 0 (0 to 0)      | 28.3% (15.1% to 45%)      |
| El Salvador       | Poisoning by other means                        | 0 (0 to 0)     | 0 (0 to 0)      | 1.8% (-6.6% to 11%)       |
| El Salvador       | Pulmonary aspiration and foreign body in airway | 1 (0 to 1)     | 0 (0 to 1)      | -59.8% (-67.4% to -51.4%) |
| El Salvador       | Self-harm by firearm                            | 0 (0 to 0)     | 0 (0 to 0)      | 28% (7.7% to 52.2%)       |
| El Salvador       | Self-harm by other specified means              | 1 (1 to 1)     | 1 (0 to 1)      | -19.8% (-28.1% to -11.6%) |
| El Salvador       | Unintentional firearm injuries                  | 2 (1 to 3)     | 2 (1 to 4)      | 17.5% (6% to 30.5%)       |
| El Salvador       | Venomous animal contact                         | 7 (3 to 14)    | 6 (3 to 12)     | -15.5% (-19.5% to -10.8%) |
| Equatorial Guinea | Adverse effects of medical treatment            | 0 (0 to 0)     | 0 (0 to 0)      | 0% (0% to 0%)             |
| Equatorial Guinea | Conflict and terrorism                          | 0 (0 to 0)     | 0 (0 to 0)      | NA                        |
| Equatorial Guinea | Cyclist road injuries                           | 17 (11 to 24)  | 22 (15 to 31)   | 32% (20.8% to 45.4%)      |
| Equatorial Guinea | Drowning                                        | 0 (0 to 0)     | 0 (0 to 0)      | -9.6% (-22.3% to 3.9%)    |
| Equatorial Guinea | Environmental heat and cold exposure            | 2 (2 to 3)     | 2 (2 to 3)      | -5.4% (-13.1% to 3.2%)    |
| Equatorial Guinea | Executions and police conflict                  | 0 (0 to 0)     | 0 (0 to 0)      | NA                        |
| Equatorial Guinea | Exposure to forces of nature                    | 0 (0 to 0)     | 0 (0 to 0)      | NA                        |
| Equatorial Guinea | Falls                                           | 34 (26 to 42)  | 47 (37 to 60)   | 40% (33.8% to 46.2%)      |
| Equatorial Guinea | Fire, heat, and hot substances                  | 1 (1 to 2)     | 1 (0 to 1)      | -19% (-27.9% to -10.3%)   |
| Equatorial Guinea | Foreign body in eyes                            | 0 (0 to 0)     | 0 (0 to 0)      | 2.7% (1.1% to 5.4%)       |
| Equatorial Guinea | Foreign body in other body part                 | 4 (2 to 8)     | 3 (2 to 6)      | -13.9% (-21.4% to -8.2%)  |
| Equatorial Guinea | Motor vehicle road injuries                     | 39 (30 to 50)  | 46 (35 to 59)   | 18.7% (8.8% to 29.5%)     |
| Equatorial Guinea | Motorcyclist road injuries                      | 10 (7 to 13)   | 11 (8 to 15)    | 12.9% (-1.2% to 29%)      |
| Equatorial Guinea | Non-venomous animal contact                     | 10 (6 to 16)   | 4 (3 to 7)      | -54% (-58.7% to -48.8%)   |
| Equatorial Guinea | Other exposure to mechanical forces             | 16 (9 to 26)   | 15 (9 to 24)    | -7.6% (-17% to 3.4%)      |
| Equatorial Guinea | Other road injuries                             | 1 (1 to 2)     | 1 (1 to 3)      | 39.1% (23.7% to 58.4%)    |
| Equatorial Guinea | Other transport injuries                        | 6 (4 to 7)     | 5 (3 to 6)      | -15% (-23.4% to -6.5%)    |
| Equatorial Guinea | Other unintentional injuries                    | 8 (5 to 12)    | 7 (4 to 11)     | -17.8% (-28.5% to -7.3%)  |
| Equatorial Guinea | Pedestrian road injuries                        | 39 (30 to 49)  | 34 (26 to 43)   | -13% (-19.5% to -6.3%)    |
| Equatorial Guinea | Physical violence by firearm                    | 0 (0 to 0)     | 0 (0 to 0)      | 46.2% (23.3% to 70.3%)    |

|                   |                                                 |                    |               |                           |
|-------------------|-------------------------------------------------|--------------------|---------------|---------------------------|
| Equatorial Guinea | Physical violence by other means                | 6 (4 to 9)         | 6 (4 to 9)    | -0.8% (-8.1% to 6.9%)     |
| Equatorial Guinea | Physical violence by sharp object               | 2 (2 to 4)         | 3 (2 to 4)    | 3.8% (-5.9% to 15.2%)     |
| Equatorial Guinea | Poisoning by carbon monoxide                    | 0 (0 to 0)         | 0 (0 to 0)    | 27.4% (6.6% to 50.9%)     |
| Equatorial Guinea | Poisoning by other means                        | 0 (0 to 0)         | 0 (0 to 0)    | -26.5% (-37.6% to -14.2%) |
| Equatorial Guinea | Pulmonary aspiration and foreign body in airway | 1 (0 to 1)         | 0 (0 to 0)    | -52.9% (-60.6% to -44.2%) |
| Equatorial Guinea | Self-harm by firearm                            | 0 (0 to 0)         | 0 (0 to 1)    | 38.2% (19% to 62.5%)      |
| Equatorial Guinea | Self-harm by other specified means              | 1 (1 to 2)         | 1 (1 to 2)    | -6.1% (-14% to 1.2%)      |
| Equatorial Guinea | Unintentional firearm injuries                  | 2 (1 to 3)         | 1 (1 to 2)    | -18.1% (-29.8% to -5.8%)  |
| Equatorial Guinea | Venomous animal contact                         | 2 (1 to 4)         | 1 (0 to 2)    | -47.8% (-54.6% to -38.9%) |
| Eritrea           | Adverse effects of medical treatment            | 0 (0 to 0)         | 0 (0 to 0)    | 0% (0% to 0%)             |
| Eritrea           | Conflict and terrorism                          | 1166 (381 to 2867) | 0 (0 to 0)    | NA                        |
| Eritrea           | Cyclist road injuries                           | 34 (23 to 51)      | 35 (23 to 52) | 3% (-4.8% to 11.7%)       |
| Eritrea           | Drowning                                        | 0 (0 to 0)         | 0 (0 to 0)    | -19.2% (-23.9% to -13.3%) |
| Eritrea           | Environmental heat and cold exposure            | 0 (0 to 1)         | 0 (0 to 1)    | -8.7% (-14.9% to -2.7%)   |
| Eritrea           | Executions and police conflict                  | 0 (0 to 0)         | 0 (0 to 0)    | NA                        |
| Eritrea           | Exposure to forces of nature                    | 0 (0 to 0)         | 0 (0 to 0)    | NA                        |
| Eritrea           | Falls                                           | 21 (13 to 32)      | 26 (16 to 40) | 25.5% (21.7% to 29.9%)    |
| Eritrea           | Fire, heat, and hot substances                  | 0 (0 to 1)         | 0 (0 to 1)    | -12.9% (-17.8% to -8.5%)  |
| Eritrea           | Foreign body in eyes                            | 0 (0 to 0)         | 0 (0 to 0)    | 0.6% (0.1% to 1.5%)       |
| Eritrea           | Foreign body in other body part                 | 3 (1 to 7)         | 3 (1 to 7)    | 2.1% (-2.9% to 8.7%)      |
| Eritrea           | Motor vehicle road injuries                     | 41 (27 to 59)      | 44 (29 to 62) | 7.3% (-1% to 16.9%)       |
| Eritrea           | Motorcyclist road injuries                      | 21 (15 to 29)      | 21 (15 to 29) | 2.5% (-5.4% to 10.4%)     |
| Eritrea           | Non-venomous animal contact                     | 8 (4 to 15)        | 7 (3 to 13)   | -14% (-17.5% to -10%)     |
| Eritrea           | Other exposure to mechanical forces             | 30 (15 to 55)      | 28 (14 to 51) | -6.3% (-11% to -0.5%)     |
| Eritrea           | Other road injuries                             | 1 (1 to 3)         | 2 (1 to 3)    | 12.1% (2% to 23.2%)       |
| Eritrea           | Other transport injuries                        | 3 (2 to 4)         | 3 (2 to 4)    | -7.2% (-12% to -2.2%)     |
| Eritrea           | Other unintentional injuries                    | 3 (2 to 5)         | 3 (2 to 5)    | -13.4% (-18.6% to -8.2%)  |
| Eritrea           | Pedestrian road injuries                        | 67 (49 to 88)      | 67 (49 to 88) | -0.1% (-6.8% to 6.6%)     |
| Eritrea           | Physical violence by firearm                    | 0 (0 to 0)         | 0 (0 to 0)    | 48.8% (35.8% to 64.4%)    |
| Eritrea           | Physical violence by other means                | 7 (5 to 11)        | 10 (6 to 15)  | 34.8% (25.9% to 43.5%)    |
| Eritrea           | Physical violence by sharp object               | 2 (1 to 4)         | 3 (1 to 5)    | 37.8% (27.4% to 50.8%)    |
| Eritrea           | Poisoning by carbon monoxide                    | 0 (0 to 0)         | 0 (0 to 0)    | 14.6% (2.6% to 27.3%)     |
| Eritrea           | Poisoning by other means                        | 0 (0 to 0)         | 0 (0 to 0)    | -20.4% (-26.8% to -13.3%) |
| Eritrea           | Pulmonary aspiration and foreign body in airway | 0 (0 to 0)         | 0 (0 to 0)    | -11.3% (-20.6% to -0.1%)  |
| Eritrea           | Self-harm by firearm                            | 0 (0 to 0)         | 0 (0 to 0)    | 34.6% (25% to 46.2%)      |
| Eritrea           | Self-harm by other specified means              | 0 (0 to 0)         | 0 (0 to 0)    | 16.2% (9.6% to 22.4%)     |
| Eritrea           | Unintentional firearm injuries                  | 1 (0 to 2)         | 1 (0 to 2)    | -20.7% (-27.7% to -12.9%) |
| Eritrea           | Venomous animal contact                         | 1 (0 to 4)         | 1 (0 to 3)    | -15.4% (-21.5% to -9.2%)  |
| Estonia           | Adverse effects of medical treatment            | 0 (0 to 0)         | 0 (0 to 0)    | 0% (0% to 0%)             |
| Estonia           | Conflict and terrorism                          | 0 (0 to 0)         | 0 (0 to 0)    | NA                        |
| Estonia           | Cyclist road injuries                           | 69 (49 to 93)      | 42 (30 to 57) | -39.7% (-48.4% to -30.2%) |
| Estonia           | Drowning                                        | 1 (1 to 2)         | 1 (0 to 1)    | -18.1% (-29.3% to -7.9%)  |
| Estonia           | Environmental heat and cold exposure            | 12 (9 to 16)       | 10 (8 to 15)  | -11.1% (-16.3% to -6.1%)  |

|          |                                                 |                  |                  |                           |
|----------|-------------------------------------------------|------------------|------------------|---------------------------|
| Estonia  | Executions and police conflict                  | 0 (0 to 0)       | 0 (0 to 0)       | NA                        |
| Estonia  | Exposure to forces of nature                    | 0 (0 to 0)       | 0 (0 to 0)       | NA                        |
| Estonia  | Falls                                           | 338 (266 to 430) | 257 (201 to 337) | -23.9% (-28.5% to -19.1%) |
| Estonia  | Fire, heat, and hot substances                  | 7 (4 to 12)      | 4 (2 to 6)       | -47.2% (-53.5% to -41.1%) |
| Estonia  | Foreign body in eyes                            | 0 (0 to 0)       | 0 (0 to 0)       | 1.6% (0.8% to 2.7%)       |
| Estonia  | Foreign body in other body part                 | 2 (1 to 4)       | 2 (1 to 4)       | 1.6% (-4% to 8.7%)        |
| Estonia  | Motor vehicle road injuries                     | 200 (156 to 249) | 83 (64 to 106)   | -58.5% (-65% to -52%)     |
| Estonia  | Motorcyclist road injuries                      | 16 (11 to 21)    | 10 (7 to 14)     | -34.5% (-46.4% to -21.6%) |
| Estonia  | Non-venomous animal contact                     | 4 (2 to 7)       | 4 (2 to 6)       | -7.6% (-12.3% to -2.5%)   |
| Estonia  | Other exposure to mechanical forces             | 101 (64 to 159)  | 80 (49 to 126)   | -20.8% (-29.2% to -13.2%) |
| Estonia  | Other road injuries                             | 2 (1 to 4)       | 2 (1 to 3)       | -14.1% (-26.6% to 0.3%)   |
| Estonia  | Other transport injuries                        | 8 (6 to 10)      | 6 (4 to 8)       | -30.2% (-38.5% to -21.1%) |
| Estonia  | Other unintentional injuries                    | 30 (19 to 48)    | 26 (16 to 44)    | -11.4% (-23.2% to 0.2%)   |
| Estonia  | Pedestrian road injuries                        | 86 (66 to 107)   | 30 (22 to 38)    | -65.1% (-70.1% to -59%)   |
| Estonia  | Physical violence by firearm                    | 1 (1 to 1)       | 0 (0 to 1)       | -57.3% (-70% to -39.2%)   |
| Estonia  | Physical violence by other means                | 48 (35 to 68)    | 24 (17 to 33)    | -50.6% (-56.9% to -42.5%) |
| Estonia  | Physical violence by sharp object               | 7 (5 to 11)      | 3 (2 to 5)       | -59.7% (-68.1% to -50.2%) |
| Estonia  | Poisoning by carbon monoxide                    | 0 (0 to 0)       | 0 (0 to 0)       | 17.6% (-3.5% to 38.6%)    |
| Estonia  | Poisoning by other means                        | 0 (0 to 1)       | 0 (0 to 1)       | 2.4% (-11% to 14.6%)      |
| Estonia  | Pulmonary aspiration and foreign body in airway | 2 (1 to 3)       | 1 (0 to 1)       | -45.1% (-52.3% to -36.7%) |
| Estonia  | Self-harm by firearm                            | 2 (1 to 3)       | 1 (0 to 1)       | -52.8% (-60.4% to -44.7%) |
| Estonia  | Self-harm by other specified means              | 6 (4 to 9)       | 3 (2 to 5)       | -42.7% (-46.8% to -37.8%) |
| Estonia  | Unintentional firearm injuries                  | 1 (1 to 2)       | 1 (1 to 2)       | -12.5% (-26.1% to 1.4%)   |
| Estonia  | Venomous animal contact                         | 3 (1 to 6)       | 3 (1 to 5)       | -9.2% (-14.1% to -4%)     |
| Eswatini | Adverse effects of medical treatment            | 0 (0 to 0)       | 0 (0 to 0)       | 0% (0% to 0%)             |
| Eswatini | Conflict and terrorism                          | 0 (0 to 0)       | 0 (0 to 0)       | NA                        |
| Eswatini | Cyclist road injuries                           | 11 (7 to 16)     | 14 (9 to 21)     | 26.9% (16.7% to 38.5%)    |
| Eswatini | Drowning                                        | 0 (0 to 0)       | 0 (0 to 0)       | 0.9% (-5.7% to 7.6%)      |
| Eswatini | Environmental heat and cold exposure            | 0 (0 to 1)       | 0 (0 to 1)       | 2.6% (-3.5% to 8.5%)      |
| Eswatini | Executions and police conflict                  | 0 (0 to 0)       | 0 (0 to 0)       | NA                        |
| Eswatini | Exposure to forces of nature                    | 0 (0 to 0)       | 0 (0 to 0)       | NA                        |
| Eswatini | Falls                                           | 19 (12 to 28)    | 23 (14 to 35)    | 23% (18.1% to 28.8%)      |
| Eswatini | Fire, heat, and hot substances                  | 0 (0 to 0)       | 0 (0 to 0)       | 3.3% (-4% to 9.8%)        |
| Eswatini | Foreign body in eyes                            | 0 (0 to 0)       | 0 (0 to 0)       | -0.1% (-0.8% to 0.8%)     |
| Eswatini | Foreign body in other body part                 | 4 (2 to 8)       | 4 (2 to 8)       | -1.4% (-6.3% to 4.2%)     |
| Eswatini | Motor vehicle road injuries                     | 31 (21 to 43)    | 39 (26 to 55)    | 27.8% (18.1% to 38.3%)    |
| Eswatini | Motorcyclist road injuries                      | 9 (6 to 13)      | 14 (10 to 19)    | 50.6% (35.9% to 68%)      |
| Eswatini | Non-venomous animal contact                     | 4 (2 to 7)       | 3 (2 to 7)       | -2.7% (-7.5% to 3.3%)     |
| Eswatini | Other exposure to mechanical forces             | 29 (14 to 52)    | 28 (14 to 51)    | -2.9% (-8.2% to 3%)       |
| Eswatini | Other road injuries                             | 1 (1 to 2)       | 1 (1 to 3)       | 13.6% (3.6% to 23.7%)     |
| Eswatini | Other transport injuries                        | 3 (2 to 5)       | 3 (2 to 5)       | 4.7% (-2.2% to 10.9%)     |
| Eswatini | Other unintentional injuries                    | 2 (1 to 4)       | 2 (1 to 4)       | -7% (-12.1% to -1.6%)     |
| Eswatini | Pedestrian road injuries                        | 37 (28 to 48)    | 43 (31 to 57)    | 16.5% (7.7% to 24.7%)     |

|          |                                                 |                   |               |                           |
|----------|-------------------------------------------------|-------------------|---------------|---------------------------|
| Eswatini | Physical violence by firearm                    | 0 (0 to 1)        | 0 (0 to 1)    | -15% (-24.3% to -4.6%)    |
| Eswatini | Physical violence by other means                | 17 (11 to 26)     | 16 (10 to 24) | -10.5% (-19.1% to -1.2%)  |
| Eswatini | Physical violence by sharp object               | 6 (3 to 10)       | 5 (3 to 9)    | -7.2% (-17.8% to 4.7%)    |
| Eswatini | Poisoning by carbon monoxide                    | 0 (0 to 0)        | 0 (0 to 0)    | 7.6% (-3% to 19.7%)       |
| Eswatini | Poisoning by other means                        | 0 (0 to 0)        | 0 (0 to 0)    | -6.4% (-14.5% to 1.8%)    |
| Eswatini | Pulmonary aspiration and foreign body in airway | 0 (0 to 0)        | 0 (0 to 0)    | 2.4% (-6.8% to 12.2%)     |
| Eswatini | Self-harm by firearm                            | 0 (0 to 0)        | 0 (0 to 0)    | 61.6% (46.7% to 81.4%)    |
| Eswatini | Self-harm by other specified means              | 0 (0 to 0)        | 0 (0 to 0)    | 40.7% (30.3% to 51.9%)    |
| Eswatini | Unintentional firearm injuries                  | 1 (0 to 1)        | 0 (0 to 1)    | -9.8% (-17.8% to 0%)      |
| Eswatini | Venomous animal contact                         | 0 (0 to 1)        | 0 (0 to 1)    | -11.6% (-18.1% to -4.4%)  |
| Ethiopia | Adverse effects of medical treatment            | 0 (0 to 0)        | 0 (0 to 0)    | 0% (0% to 0%)             |
| Ethiopia | Conflict and terrorism                          | 701 (291 to 1568) | 1 (0 to 3)    | NA                        |
| Ethiopia | Cyclist road injuries                           | 53 (39 to 73)     | 40 (30 to 54) | -24.5% (-27.4% to -21.4%) |
| Ethiopia | Drowning                                        | 0 (0 to 0)        | 0 (0 to 0)    | -32.4% (-37.8% to -27.4%) |
| Ethiopia | Environmental heat and cold exposure            | 3 (2 to 4)        | 2 (2 to 3)    | -14% (-19.7% to -8.2%)    |
| Ethiopia | Executions and police conflict                  | 0 (0 to 0)        | 0 (0 to 1)    | NA                        |
| Ethiopia | Exposure to forces of nature                    | 0 (0 to 0)        | 0 (0 to 0)    | NA                        |
| Ethiopia | Falls                                           | 49 (39 to 63)     | 52 (41 to 68) | 6.7% (3.7% to 9.7%)       |
| Ethiopia | Fire, heat, and hot substances                  | 3 (2 to 4)        | 2 (1 to 3)    | -24.3% (-29% to -19.8%)   |
| Ethiopia | Foreign body in eyes                            | 0 (0 to 0)        | 0 (0 to 0)    | 0.4% (0.1% to 1%)         |
| Ethiopia | Foreign body in other body part                 | 3 (2 to 7)        | 3 (2 to 7)    | 0.8% (-3.5% to 5%)        |
| Ethiopia | Motor vehicle road injuries                     | 40 (29 to 54)     | 29 (21 to 38) | -27.2% (-30.6% to -23.4%) |
| Ethiopia | Motorcyclist road injuries                      | 18 (13 to 24)     | 13 (10 to 17) | -28.3% (-31.8% to -24.3%) |
| Ethiopia | Non-venomous animal contact                     | 14 (8 to 25)      | 10 (6 to 17)  | -32.5% (-35.1% to -29.7%) |
| Ethiopia | Other exposure to mechanical forces             | 22 (13 to 35)     | 20 (12 to 32) | -8.8% (-12.9% to -4.6%)   |
| Ethiopia | Other road injuries                             | 2 (1 to 3)        | 1 (1 to 3)    | -4.3% (-10.5% to 2.4%)    |
| Ethiopia | Other transport injuries                        | 7 (6 to 10)       | 6 (4 to 8)    | -20.4% (-26.2% to -14.9%) |
| Ethiopia | Other unintentional injuries                    | 11 (8 to 18)      | 8 (5 to 13)   | -27.8% (-31.7% to -24.7%) |
| Ethiopia | Pedestrian road injuries                        | 65 (49 to 82)     | 40 (30 to 52) | -38.1% (-40.7% to -35.3%) |
| Ethiopia | Physical violence by firearm                    | 0 (0 to 1)        | 0 (0 to 0)    | -26.8% (-30.9% to -21.5%) |
| Ethiopia | Physical violence by other means                | 13 (9 to 19)      | 10 (7 to 14)  | -28.1% (-30.7% to -25.5%) |
| Ethiopia | Physical violence by sharp object               | 4 (3 to 6)        | 3 (2 to 5)    | -21.5% (-24.9% to -17.5%) |
| Ethiopia | Poisoning by carbon monoxide                    | 0 (0 to 0)        | 0 (0 to 0)    | -6.7% (-15.7% to 2.8%)    |
| Ethiopia | Poisoning by other means                        | 0 (0 to 0)        | 0 (0 to 0)    | -43.7% (-48.1% to -38.9%) |
| Ethiopia | Pulmonary aspiration and foreign body in airway | 0 (0 to 1)        | 0 (0 to 1)    | -24.5% (-31.4% to -16.9%) |
| Ethiopia | Self-harm by firearm                            | 0 (0 to 0)        | 0 (0 to 0)    | -23.7% (-30.1% to -16.2%) |
| Ethiopia | Self-harm by other specified means              | 2 (1 to 3)        | 1 (1 to 1)    | -40.3% (-42.5% to -37.7%) |
| Ethiopia | Unintentional firearm injuries                  | 3 (2 to 4)        | 2 (1 to 3)    | -30.5% (-36% to -24%)     |
| Ethiopia | Venomous animal contact                         | 5 (2 to 11)       | 4 (1 to 8)    | -31.7% (-37.3% to -27%)   |
| Fiji     | Adverse effects of medical treatment            | 0 (0 to 0)        | 0 (0 to 0)    | 0% (0% to 0%)             |
| Fiji     | Conflict and terrorism                          | 0 (0 to 0)        | 0 (0 to 0)    | NA                        |
| Fiji     | Cyclist road injuries                           | 11 (7 to 15)      | 11 (7 to 15)  | -0.9% (-7.5% to 6.6%)     |
| Fiji     | Drowning                                        | 0 (0 to 1)        | 0 (0 to 1)    | 2.5% (-4.9% to 10.5%)     |

|         |                                                 |                  |                  |                           |
|---------|-------------------------------------------------|------------------|------------------|---------------------------|
| Fiji    | Environmental heat and cold exposure            | 2 (1 to 3)       | 2 (1 to 3)       | -0.3% (-5.2% to 5%)       |
| Fiji    | Executions and police conflict                  | 0 (0 to 0)       | 0 (0 to 0)       | NA                        |
| Fiji    | Exposure to forces of nature                    | 0 (0 to 0)       | 0 (0 to 0)       | NA                        |
| Fiji    | Falls                                           | 46 (35 to 61)    | 61 (48 to 82)    | 34.1% (29.6% to 39.1%)    |
| Fiji    | Fire, heat, and hot substances                  | 2 (1 to 3)       | 2 (1 to 3)       | -3.4% (-8.7% to 1.9%)     |
| Fiji    | Foreign body in eyes                            | 0 (0 to 0)       | 0 (0 to 0)       | -0.3% (-1.1% to 0.1%)     |
| Fiji    | Foreign body in other body part                 | 1 (0 to 1)       | 1 (0 to 1)       | -3.6% (-8% to 1%)         |
| Fiji    | Motor vehicle road injuries                     | 28 (21 to 35)    | 22 (17 to 28)    | -20.4% (-26.1% to -14.4%) |
| Fiji    | Motorcyclist road injuries                      | 13 (9 to 17)     | 14 (11 to 19)    | 12.6% (3.8% to 22.2%)     |
| Fiji    | Non-venomous animal contact                     | 4 (2 to 8)       | 4 (2 to 7)       | -18% (-22.4% to -13.8%)   |
| Fiji    | Other exposure to mechanical forces             | 12 (7 to 21)     | 11 (6 to 18)     | -14.1% (-18.9% to -9.5%)  |
| Fiji    | Other road injuries                             | 1 (1 to 2)       | 1 (1 to 2)       | -2.1% (-11% to 8.5%)      |
| Fiji    | Other transport injuries                        | 6 (5 to 8)       | 6 (4 to 8)       | -4% (-9% to 1.2%)         |
| Fiji    | Other unintentional injuries                    | 8 (6 to 13)      | 7 (4 to 11)      | -19.3% (-23.4% to -14.8%) |
| Fiji    | Pedestrian road injuries                        | 9 (6 to 11)      | 8 (6 to 10)      | -12.2% (-19.1% to -4.1%)  |
| Fiji    | Physical violence by firearm                    | 0 (0 to 0)       | 0 (0 to 0)       | 25.8% (12.8% to 40.3%)    |
| Fiji    | Physical violence by other means                | 25 (18 to 35)    | 27 (19 to 38)    | 7.8% (0.2% to 15.9%)      |
| Fiji    | Physical violence by sharp object               | 1 (1 to 2)       | 1 (1 to 2)       | 3.1% (-6.5% to 14.6%)     |
| Fiji    | Poisoning by carbon monoxide                    | 0 (0 to 0)       | 0 (0 to 0)       | 13.7% (3% to 24.5%)       |
| Fiji    | Poisoning by other means                        | 0 (0 to 0)       | 0 (0 to 0)       | -7.3% (-14.5% to -0.5%)   |
| Fiji    | Pulmonary aspiration and foreign body in airway | 0 (0 to 0)       | 0 (0 to 0)       | -4.9% (-14.1% to 6.2%)    |
| Fiji    | Self-harm by firearm                            | 0 (0 to 1)       | 0 (0 to 1)       | 12.3% (-3% to 29.3%)      |
| Fiji    | Self-harm by other specified means              | 2 (1 to 3)       | 2 (1 to 3)       | -9.3% (-15.6% to -2.4%)   |
| Fiji    | Unintentional firearm injuries                  | 2 (1 to 3)       | 2 (1 to 3)       | -5.6% (-12.4% to 1.3%)    |
| Fiji    | Venomous animal contact                         | 3 (1 to 6)       | 3 (1 to 5)       | -10.3% (-16% to -3.6%)    |
| Finland | Adverse effects of medical treatment            | 0 (0 to 0)       | 0 (0 to 0)       | 0% (0% to 0%)             |
| Finland | Conflict and terrorism                          | 1 (0 to 1)       | 0 (0 to 0)       | NA                        |
| Finland | Cyclist road injuries                           | 38 (28 to 50)    | 21 (15 to 29)    | -44% (-51.6% to -36%)     |
| Finland | Drowning                                        | 0 (0 to 0)       | 0 (0 to 0)       | 69.6% (52.5% to 88.8%)    |
| Finland | Environmental heat and cold exposure            | 3 (2 to 4)       | 3 (2 to 4)       | 4.3% (-0.8% to 10.5%)     |
| Finland | Executions and police conflict                  | 0 (0 to 0)       | 0 (0 to 0)       | NA                        |
| Finland | Exposure to forces of nature                    | 0 (0 to 0)       | 0 (0 to 0)       | NA                        |
| Finland | Falls                                           | 409 (320 to 521) | 418 (324 to 539) | 2.2% (-2.4% to 7%)        |
| Finland | Fire, heat, and hot substances                  | 4 (2 to 7)       | 3 (2 to 5)       | -28.2% (-34.5% to -22.1%) |
| Finland | Foreign body in eyes                            | 0 (0 to 0)       | 0 (0 to 0)       | 1% (0.3% to 2%)           |
| Finland | Foreign body in other body part                 | 2 (1 to 4)       | 2 (1 to 4)       | 0.3% (-4.2% to 5.3%)      |
| Finland | Motor vehicle road injuries                     | 44 (33 to 56)    | 23 (17 to 30)    | -47.9% (-54.8% to -40.7%) |
| Finland | Motorcyclist road injuries                      | 12 (9 to 15)     | 10 (7 to 13)     | -16.3% (-29% to -2.4%)    |
| Finland | Non-venomous animal contact                     | 3 (2 to 6)       | 3 (1 to 5)       | -17.7% (-21.5% to -13.5%) |
| Finland | Other exposure to mechanical forces             | 53 (32 to 85)    | 50 (30 to 80)    | -6.2% (-12% to 0%)        |
| Finland | Other road injuries                             | 1 (1 to 2)       | 1 (0 to 2)       | -17.1% (-27.4% to -5.7%)  |
| Finland | Other transport injuries                        | 8 (7 to 11)      | 6 (4 to 7)       | -33.6% (-39.5% to -25.8%) |
| Finland | Other unintentional injuries                    | 32 (21 to 51)    | 25 (16 to 40)    | -22.5% (-28.9% to -16.8%) |

|         |                                                 |                  |                  |                           |
|---------|-------------------------------------------------|------------------|------------------|---------------------------|
| Finland | Pedestrian road injuries                        | 11 (8 to 14)     | 7 (5 to 10)      | -33.3% (-43.3% to -22.7%) |
| Finland | Physical violence by firearm                    | 1 (0 to 1)       | 1 (0 to 1)       | 16.6% (0.4% to 34.5%)     |
| Finland | Physical violence by other means                | 27 (19 to 38)    | 18 (13 to 26)    | -30.9% (-37.8% to -23.3%) |
| Finland | Physical violence by sharp object               | 3 (2 to 5)       | 2 (1 to 3)       | -40.6% (-49.2% to -31.5%) |
| Finland | Poisoning by carbon monoxide                    | 0 (0 to 0)       | 0 (0 to 0)       | -75.6% (-82.8% to -66.4%) |
| Finland | Poisoning by other means                        | 0 (0 to 1)       | 0 (0 to 0)       | -44.5% (-53.9% to -34.6%) |
| Finland | Pulmonary aspiration and foreign body in airway | 1 (1 to 2)       | 1 (1 to 2)       | -21% (-28.4% to -13.7%)   |
| Finland | Self-harm by firearm                            | 2 (1 to 3)       | 1 (0 to 1)       | -67% (-72.4% to -61.2%)   |
| Finland | Self-harm by other specified means              | 6 (4 to 9)       | 4 (3 to 6)       | -35.7% (-40.4% to -30.5%) |
| Finland | Unintentional firearm injuries                  | 1 (1 to 2)       | 1 (1 to 2)       | 0% (-10.8% to 11.7%)      |
| Finland | Venomous animal contact                         | 1 (0 to 2)       | 1 (0 to 2)       | -14.4% (-19.2% to -8.2%)  |
| France  | Adverse effects of medical treatment            | 0 (0 to 0)       | 0 (0 to 0)       | 0% (0% to 0%)             |
| France  | Conflict and terrorism                          | 0 (0 to 0)       | 0 (0 to 0)       | NA                        |
| France  | Cyclist road injuries                           | 25 (18 to 34)    | 20 (14 to 27)    | -19.9% (-31.2% to -7.6%)  |
| France  | Drowning                                        | 0 (0 to 0)       | 0 (0 to 0)       | 93% (74.9% to 109%)       |
| France  | Environmental heat and cold exposure            | 2 (2 to 3)       | 2 (1 to 3)       | -11.7% (-16.6% to -6.3%)  |
| France  | Executions and police conflict                  | 0 (0 to 0)       | 0 (0 to 0)       | NA                        |
| France  | Exposure to forces of nature                    | 0 (0 to 0)       | 0 (0 to 0)       | NA                        |
| France  | Falls                                           | 319 (254 to 402) | 329 (259 to 419) | 3.1% (-1.4% to 8.1%)      |
| France  | Fire, heat, and hot substances                  | 3 (2 to 4)       | 2 (1 to 4)       | -9.7% (-15.3% to -4.5%)   |
| France  | Foreign body in eyes                            | 0 (0 to 0)       | 0 (0 to 0)       | 0.2% (0% to 0.6%)         |
| France  | Foreign body in other body part                 | 2 (1 to 3)       | 2 (1 to 3)       | 5.5% (0.8% to 10.6%)      |
| France  | Motor vehicle road injuries                     | 49 (38 to 63)    | 22 (16 to 28)    | -55.8% (-63% to -47.4%)   |
| France  | Motorcyclist road injuries                      | 12 (9 to 16)     | 11 (8 to 14)     | -8.7% (-23.7% to 9.3%)    |
| France  | Non-venomous animal contact                     | 2 (1 to 4)       | 2 (1 to 4)       | -6.2% (-10.2% to -1.9%)   |
| France  | Other exposure to mechanical forces             | 51 (31 to 80)    | 48 (28 to 76)    | -6.7% (-12.7% to -0.3%)   |
| France  | Other road injuries                             | 1 (1 to 2)       | 1 (1 to 2)       | -10.8% (-25.1% to 4%)     |
| France  | Other transport injuries                        | 5 (4 to 6)       | 5 (4 to 7)       | 10.4% (5.4% to 16.3%)     |
| France  | Other unintentional injuries                    | 33 (22 to 51)    | 26 (17 to 41)    | -21.8% (-27.1% to -16.6%) |
| France  | Pedestrian road injuries                        | 19 (14 to 25)    | 7 (5 to 10)      | -62.3% (-68.4% to -54.9%) |
| France  | Physical violence by firearm                    | 0 (0 to 1)       | 1 (0 to 1)       | 29% (15.1% to 45.2%)      |
| France  | Physical violence by other means                | 16 (12 to 23)    | 13 (9 to 19)     | -20.8% (-27.8% to -14.6%) |
| France  | Physical violence by sharp object               | 1 (1 to 2)       | 1 (1 to 2)       | -13.2% (-23.3% to -3.8%)  |
| France  | Poisoning by carbon monoxide                    | 0 (0 to 0)       | 0 (0 to 0)       | 11.9% (3.8% to 21.2%)     |
| France  | Poisoning by other means                        | 0 (0 to 0)       | 0 (0 to 0)       | -0.3% (-6.7% to 5%)       |
| France  | Pulmonary aspiration and foreign body in airway | 1 (1 to 2)       | 1 (1 to 2)       | -15.8% (-24.1% to -5.9%)  |
| France  | Self-harm by firearm                            | 1 (1 to 2)       | 1 (0 to 1)       | -47% (-54.4% to -38.3%)   |
| France  | Self-harm by other specified means              | 4 (3 to 7)       | 3 (2 to 5)       | -24.6% (-29.5% to -19.2%) |
| France  | Unintentional firearm injuries                  | 1 (1 to 2)       | 1 (1 to 2)       | -10.8% (-19.7% to -1.1%)  |
| France  | Venomous animal contact                         | 1 (0 to 2)       | 1 (0 to 2)       | -9.7% (-15.1% to -4.9%)   |
| Gabon   | Adverse effects of medical treatment            | 0 (0 to 0)       | 0 (0 to 0)       | 0% (0% to 0%)             |
| Gabon   | Conflict and terrorism                          | 0 (0 to 0)       | 1 (0 to 2)       | NA                        |
| Gabon   | Cyclist road injuries                           | 22 (15 to 31)    | 22 (15 to 31)    | -0.9% (-7.7% to 7.2%)     |



|        |                                                 |               |               |                           |
|--------|-------------------------------------------------|---------------|---------------|---------------------------|
| Gabon  | Drowning                                        | 0 (0 to 0)    | 0 (0 to 0)    | -16.1% (-23.7% to -8.3%)  |
| Gabon  | Environmental heat and cold exposure            | 3 (2 to 4)    | 2 (2 to 4)    | -6.9% (-11.9% to -0.7%)   |
| Gabon  | Executions and police conflict                  | 0 (0 to 0)    | 0 (0 to 0)    | NA                        |
| Gabon  | Exposure to forces of nature                    | 0 (0 to 0)    | 0 (0 to 0)    | NA                        |
| Gabon  | Falls                                           | 47 (37 to 59) | 53 (43 to 67) | 13.1% (8.9% to 16.7%)     |
| Gabon  | Fire, heat, and hot substances                  | 1 (1 to 2)    | 1 (1 to 2)    | -12.1% (-17% to -7.1%)    |
| Gabon  | Foreign body in eyes                            | 0 (0 to 0)    | 0 (0 to 0)    | -0.4% (-1.4% to 0.2%)     |
| Gabon  | Foreign body in other body part                 | 3 (2 to 6)    | 3 (2 to 6)    | -2.6% (-7.6% to 2.7%)     |
| Gabon  | Motor vehicle road injuries                     | 50 (38 to 64) | 48 (37 to 63) | -2.7% (-8.5% to 4.2%)     |
| Gabon  | Motorcyclist road injuries                      | 15 (12 to 20) | 14 (11 to 19) | -5.6% (-13.5% to 3.7%)    |
| Gabon  | Non-venomous animal contact                     | 5 (3 to 9)    | 5 (3 to 9)    | -3.7% (-8.5% to 1.2%)     |
| Gabon  | Other exposure to mechanical forces             | 17 (10 to 29) | 15 (9 to 25)  | -11.6% (-17% to -5.4%)    |
| Gabon  | Other road injuries                             | 1 (1 to 2)    | 1 (1 to 3)    | 2.8% (-5.4% to 12.4%)     |
| Gabon  | Other transport injuries                        | 6 (4 to 8)    | 5 (4 to 7)    | -11.5% (-16.3% to -6.2%)  |
| Gabon  | Other unintentional injuries                    | 8 (5 to 12)   | 7 (4 to 12)   | -9.6% (-17.1% to -2.7%)   |
| Gabon  | Pedestrian road injuries                        | 48 (37 to 60) | 40 (31 to 51) | -16.2% (-21.2% to -10.8%) |
| Gabon  | Physical violence by firearm                    | 0 (0 to 0)    | 0 (0 to 0)    | 16.3% (4% to 30.7%)       |
| Gabon  | Physical violence by other means                | 7 (5 to 11)   | 6 (4 to 9)    | -13.4% (-18.8% to -8.3%)  |
| Gabon  | Physical violence by sharp object               | 3 (2 to 4)    | 3 (2 to 4)    | -12.2% (-18.4% to -6%)    |
| Gabon  | Poisoning by carbon monoxide                    | 0 (0 to 0)    | 0 (0 to 0)    | 12.6% (2.3% to 25.7%)     |
| Gabon  | Poisoning by other means                        | 0 (0 to 0)    | 0 (0 to 0)    | -16.4% (-22.7% to -9%)    |
| Gabon  | Pulmonary aspiration and foreign body in airway | 0 (0 to 1)    | 0 (0 to 1)    | -13.6% (-21.9% to -3.1%)  |
| Gabon  | Self-harm by firearm                            | 0 (0 to 1)    | 0 (0 to 1)    | 2.7% (-8.9% to 16.5%)     |
| Gabon  | Self-harm by other specified means              | 2 (1 to 2)    | 1 (1 to 2)    | -13.3% (-18.3% to -7.9%)  |
| Gabon  | Unintentional firearm injuries                  | 2 (1 to 2)    | 1 (1 to 2)    | -11.8% (-18.5% to -4.3%)  |
| Gabon  | Venomous animal contact                         | 1 (0 to 3)    | 1 (0 to 3)    | -0.8% (-7.3% to 6.3%)     |
| Gambia | Adverse effects of medical treatment            | 0 (0 to 0)    | 0 (0 to 0)    | 0% (0% to 0%)             |
| Gambia | Conflict and terrorism                          | 0 (0 to 0)    | 0 (0 to 0)    | NA                        |
| Gambia | Cyclist road injuries                           | 21 (13 to 32) | 24 (15 to 35) | 11% (3.8% to 19.1%)       |
| Gambia | Drowning                                        | 0 (0 to 0)    | 0 (0 to 0)    | -5.7% (-12.5% to 1.3%)    |
| Gambia | Environmental heat and cold exposure            | 0 (0 to 1)    | 0 (0 to 1)    | -2.7% (-8.2% to 2.9%)     |
| Gambia | Executions and police conflict                  | 0 (0 to 0)    | 0 (0 to 0)    | NA                        |
| Gambia | Exposure to forces of nature                    | 0 (0 to 0)    | 0 (0 to 0)    | NA                        |
| Gambia | Falls                                           | 18 (12 to 26) | 21 (14 to 31) | 19% (15% to 23.3%)        |
| Gambia | Fire, heat, and hot substances                  | 0 (0 to 0)    | 0 (0 to 0)    | -2.2% (-7.2% to 2.5%)     |
| Gambia | Foreign body in eyes                            | 0 (0 to 0)    | 0 (0 to 0)    | -1% (-2.3% to -0.2%)      |
| Gambia | Foreign body in other body part                 | 4 (1 to 8)    | 4 (2 to 8)    | 2.7% (-2.6% to 8.8%)      |
| Gambia | Motor vehicle road injuries                     | 41 (28 to 57) | 45 (31 to 63) | 9.4% (1.7% to 17.2%)      |
| Gambia | Motorcyclist road injuries                      | 20 (14 to 28) | 23 (16 to 32) | 14% (6.7% to 22.4%)       |
| Gambia | Non-venomous animal contact                     | 3 (1 to 6)    | 3 (1 to 6)    | -0.6% (-5.7% to 4.5%)     |
| Gambia | Other exposure to mechanical forces             | 26 (13 to 47) | 24 (12 to 44) | -9% (-14.5% to -3.8%)     |
| Gambia | Other road injuries                             | 2 (1 to 3)    | 2 (1 to 3)    | 2.9% (-4.9% to 10.9%)     |
| Gambia | Other transport injuries                        | 3 (2 to 4)    | 3 (2 to 4)    | -0.8% (-6.7% to 6.1%)     |

|         |                                                 |                  |                  |                           |
|---------|-------------------------------------------------|------------------|------------------|---------------------------|
| Gambia  | Other unintentional injuries                    | 3 (2 to 5)       | 3 (2 to 5)       | -3.9% (-9.7% to 1.9%)     |
| Gambia  | Pedestrian road injuries                        | 49 (36 to 63)    | 51 (37 to 67)    | 4.8% (-1.4% to 11.3%)     |
| Gambia  | Physical violence by firearm                    | 0 (0 to 0)       | 0 (0 to 0)       | 45% (23.7% to 65.5%)      |
| Gambia  | Physical violence by other means                | 4 (3 to 6)       | 4 (3 to 6)       | 2.3% (-1.7% to 6.6%)      |
| Gambia  | Physical violence by sharp object               | 1 (1 to 2)       | 1 (1 to 2)       | 0.7% (-5.4% to 6.6%)      |
| Gambia  | Poisoning by carbon monoxide                    | 0 (0 to 0)       | 0 (0 to 0)       | 6.6% (-4% to 18.5%)       |
| Gambia  | Poisoning by other means                        | 0 (0 to 0)       | 0 (0 to 0)       | -11.3% (-17.5% to -4.5%)  |
| Gambia  | Pulmonary aspiration and foreign body in airway | 0 (0 to 0)       | 0 (0 to 0)       | 6% (-2.3% to 16.1%)       |
| Gambia  | Self-harm by firearm                            | 0 (0 to 0)       | 0 (0 to 0)       | 19.6% (12% to 27.4%)      |
| Gambia  | Self-harm by other specified means              | 0 (0 to 0)       | 0 (0 to 0)       | 16.4% (10.3% to 22.6%)    |
| Gambia  | Unintentional firearm injuries                  | 1 (0 to 2)       | 1 (0 to 2)       | -9.2% (-16.3% to -0.5%)   |
| Gambia  | Venomous animal contact                         | 0 (0 to 1)       | 0 (0 to 1)       | -0.2% (-7% to 7.2%)       |
| Georgia | Adverse effects of medical treatment            | 0 (0 to 0)       | 0 (0 to 0)       | 0% (0% to 0%)             |
| Georgia | Conflict and terrorism                          | 0 (0 to 0)       | 0 (0 to 0)       | NA                        |
| Georgia | Cyclist road injuries                           | 21 (14 to 29)    | 17 (12 to 24)    | -17.6% (-26.4% to -7.6%)  |
| Georgia | Drowning                                        | 1 (0 to 1)       | 1 (0 to 1)       | -24.3% (-33.5% to -15.2%) |
| Georgia | Environmental heat and cold exposure            | 5 (3 to 7)       | 4 (3 to 6)       | -9.1% (-17.3% to 0.6%)    |
| Georgia | Executions and police conflict                  | 0 (0 to 0)       | 0 (0 to 0)       | NA                        |
| Georgia | Exposure to forces of nature                    | 0 (0 to 0)       | 0 (0 to 0)       | NA                        |
| Georgia | Falls                                           | 189 (144 to 245) | 226 (176 to 295) | 20% (13.6% to 27.1%)      |
| Georgia | Fire, heat, and hot substances                  | 6 (4 to 10)      | 5 (3 to 8)       | -26.5% (-33.2% to -19.2%) |
| Georgia | Foreign body in eyes                            | 0 (0 to 0)       | 0 (0 to 0)       | -3.9% (-11.6% to 4.2%)    |
| Georgia | Foreign body in other body part                 | 3 (1 to 5)       | 2 (1 to 3)       | -38.7% (-44.4% to -32.2%) |
| Georgia | Motor vehicle road injuries                     | 82 (64 to 103)   | 72 (58 to 89)    | -12.1% (-20.3% to -1.6%)  |
| Georgia | Motorcyclist road injuries                      | 6 (4 to 8)       | 4 (3 to 6)       | -26.1% (-36% to -13.7%)   |
| Georgia | Non-venomous animal contact                     | 2 (1 to 4)       | 2 (1 to 4)       | -15.4% (-27.4% to 0.1%)   |
| Georgia | Other exposure to mechanical forces             | 72 (45 to 111)   | 79 (51 to 124)   | 10.4% (1.6% to 20.6%)     |
| Georgia | Other road injuries                             | 2 (1 to 3)       | 2 (1 to 4)       | 5.8% (-6.3% to 19.5%)     |
| Georgia | Other transport injuries                        | 5 (4 to 7)       | 6 (5 to 8)       | 8.4% (-4.9% to 24.7%)     |
| Georgia | Other unintentional injuries                    | 25 (16 to 40)    | 29 (19 to 45)    | 13.7% (5.4% to 23.3%)     |
| Georgia | Pedestrian road injuries                        | 27 (20 to 35)    | 30 (23 to 37)    | 9.5% (-2.7% to 24%)       |
| Georgia | Physical violence by firearm                    | 1 (0 to 1)       | 0 (0 to 1)       | -44.2% (-55% to -32.4%)   |
| Georgia | Physical violence by other means                | 17 (12 to 24)    | 13 (9 to 19)     | -21.5% (-30% to -12%)     |
| Georgia | Physical violence by sharp object               | 2 (1 to 4)       | 2 (1 to 4)       | -5.5% (-18.3% to 9.8%)    |
| Georgia | Poisoning by carbon monoxide                    | 0 (0 to 0)       | 0 (0 to 0)       | 0.6% (-14.5% to 20.7%)    |
| Georgia | Poisoning by other means                        | 0 (0 to 1)       | 0 (0 to 1)       | 18.5% (4.4% to 36.1%)     |
| Georgia | Pulmonary aspiration and foreign body in airway | 1 (1 to 2)       | 1 (1 to 2)       | 21% (7% to 36.2%)         |
| Georgia | Self-harm by firearm                            | 0 (0 to 0)       | 0 (0 to 1)       | 62.4% (40.4% to 93.1%)    |
| Georgia | Self-harm by other specified means              | 1 (1 to 2)       | 2 (1 to 2)       | 26.8% (19.1% to 35%)      |
| Georgia | Unintentional firearm injuries                  | 2 (1 to 2)       | 1 (1 to 2)       | -4.5% (-17% to 10.7%)     |
| Georgia | Venomous animal contact                         | 2 (1 to 4)       | 2 (1 to 3)       | -19.6% (-31.4% to -4.1%)  |
| Germany | Adverse effects of medical treatment            | 0 (0 to 0)       | 0 (0 to 0)       | 0% (0% to 0%)             |
| Germany | Conflict and terrorism                          | 0 (0 to 1)       | 0 (0 to 0)       | NA                        |

|         |                                                 |                  |                  |                           |
|---------|-------------------------------------------------|------------------|------------------|---------------------------|
| Germany | Cyclist road injuries                           | 28 (21 to 37)    | 18 (13 to 25)    | -34.9% (-44.8% to -24.6%) |
| Germany | Drowning                                        | 0 (0 to 0)       | 0 (0 to 0)       | 57.6% (40.5% to 76.1%)    |
| Germany | Environmental heat and cold exposure            | 2 (1 to 3)       | 2 (1 to 3)       | -1.4% (-6.3% to 3.3%)     |
| Germany | Executions and police conflict                  | 0 (0 to 0)       | 0 (0 to 0)       | NA                        |
| Germany | Exposure to forces of nature                    | 0 (0 to 0)       | 0 (0 to 0)       | NA                        |
| Germany | Falls                                           | 247 (195 to 315) | 272 (213 to 350) | 10.1% (5.2% to 15%)       |
| Germany | Fire, heat, and hot substances                  | 2 (1 to 4)       | 2 (1 to 4)       | -11.4% (-17.5% to -5.9%)  |
| Germany | Foreign body in eyes                            | 0 (0 to 0)       | 0 (0 to 0)       | 1.1% (0.3% to 2.3%)       |
| Germany | Foreign body in other body part                 | 2 (1 to 3)       | 2 (1 to 3)       | 0.8% (-3.4% to 5.6%)      |
| Germany | Motor vehicle road injuries                     | 42 (33 to 53)    | 19 (14 to 25)    | -54.6% (-62.2% to -46.3%) |
| Germany | Motorcyclist road injuries                      | 12 (9 to 16)     | 9 (7 to 12)      | -27.5% (-41% to -11.6%)   |
| Germany | Non-venomous animal contact                     | 2 (1 to 4)       | 2 (1 to 4)       | -10.6% (-14.9% to -5.7%)  |
| Germany | Other exposure to mechanical forces             | 44 (26 to 70)    | 43 (26 to 69)    | -1% (-7.2% to 4.1%)       |
| Germany | Other road injuries                             | 1 (1 to 2)       | 1 (1 to 2)       | -19.3% (-31.3% to -5.5%)  |
| Germany | Other transport injuries                        | 5 (4 to 7)       | 5 (3 to 6)       | -5.3% (-10.4% to 0%)      |
| Germany | Other unintentional injuries                    | 25 (16 to 40)    | 23 (14 to 37)    | -9% (-14.2% to -4.1%)     |
| Germany | Pedestrian road injuries                        | 10 (8 to 13)     | 6 (4 to 8)       | -42.8% (-52.2% to -32.2%) |
| Germany | Physical violence by firearm                    | 0 (0 to 1)       | 1 (0 to 1)       | 39.6% (25.5% to 56.8%)    |
| Germany | Physical violence by other means                | 15 (10 to 21)    | 13 (9 to 19)     | -12.3% (-18.6% to -6.5%)  |
| Germany | Physical violence by sharp object               | 2 (1 to 3)       | 1 (1 to 2)       | -17.8% (-26.8% to -8.8%)  |
| Germany | Poisoning by carbon monoxide                    | 0 (0 to 0)       | 0 (0 to 0)       | 9% (1.4% to 17.2%)        |
| Germany | Poisoning by other means                        | 0 (0 to 0)       | 0 (0 to 0)       | -1.9% (-7.2% to 4%)       |
| Germany | Pulmonary aspiration and foreign body in airway | 1 (1 to 2)       | 1 (1 to 2)       | -10.5% (-18.9% to -2.6%)  |
| Germany | Self-harm by firearm                            | 0 (0 to 1)       | 0 (0 to 1)       | -7% (-19.6% to 8.2%)      |
| Germany | Self-harm by other specified means              | 3 (2 to 5)       | 3 (2 to 4)       | -23.7% (-28.3% to -19.2%) |
| Germany | Unintentional firearm injuries                  | 1 (1 to 2)       | 1 (1 to 2)       | 2.6% (-5% to 10.7%)       |
| Germany | Venomous animal contact                         | 1 (0 to 2)       | 1 (0 to 2)       | -12.8% (-18.2% to -7%)    |
| Ghana   | Adverse effects of medical treatment            | 0 (0 to 0)       | 0 (0 to 0)       | 0% (0% to 0%)             |
| Ghana   | Conflict and terrorism                          | 0 (0 to 0)       | 0 (0 to 1)       | NA                        |
| Ghana   | Cyclist road injuries                           | 31 (19 to 46)    | 39 (25 to 58)    | 28% (19.2% to 38.9%)      |
| Ghana   | Drowning                                        | 0 (0 to 0)       | 0 (0 to 0)       | 4.5% (-2.5% to 12.1%)     |
| Ghana   | Environmental heat and cold exposure            | 0 (0 to 1)       | 0 (0 to 1)       | 2.8% (-2% to 8.6%)        |
| Ghana   | Executions and police conflict                  | 0 (0 to 0)       | 0 (0 to 0)       | NA                        |
| Ghana   | Exposure to forces of nature                    | 0 (0 to 0)       | 0 (0 to 0)       | NA                        |
| Ghana   | Falls                                           | 19 (12 to 28)    | 23 (15 to 35)    | 23.4% (19.4% to 27.5%)    |
| Ghana   | Fire, heat, and hot substances                  | 0 (0 to 0)       | 0 (0 to 0)       | -2.7% (-7% to 2.4%)       |
| Ghana   | Foreign body in eyes                            | 0 (0 to 0)       | 0 (0 to 0)       | -1.1% (-2.4% to -0.1%)    |
| Ghana   | Foreign body in other body part                 | 3 (1 to 7)       | 4 (1 to 8)       | 2.2% (-3.2% to 7.5%)      |
| Ghana   | Motor vehicle road injuries                     | 52 (36 to 73)    | 64 (43 to 91)    | 22.1% (13.6% to 32.1%)    |
| Ghana   | Motorcyclist road injuries                      | 17 (12 to 24)    | 25 (17 to 35)    | 45.2% (35.2% to 56.6%)    |
| Ghana   | Non-venomous animal contact                     | 3 (1 to 6)       | 3 (1 to 5)       | -10% (-14.7% to -5.2%)    |
| Ghana   | Other exposure to mechanical forces             | 22 (11 to 41)    | 23 (11 to 42)    | 1.3% (-4.7% to 7.7%)      |
| Ghana   | Other road injuries                             | 3 (1 to 5)       | 3 (2 to 6)       | 22.4% (12.5% to 33.6%)    |

|           |                                                 |                  |                  |                           |
|-----------|-------------------------------------------------|------------------|------------------|---------------------------|
| Ghana     | Other transport injuries                        | 3 (2 to 4)       | 3 (2 to 4)       | 1.1% (-4.9% to 6.7%)      |
| Ghana     | Other unintentional injuries                    | 3 (1 to 5)       | 3 (1 to 5)       | -0.4% (-7.6% to 6.4%)     |
| Ghana     | Pedestrian road injuries                        | 70 (51 to 91)    | 83 (61 to 109)   | 18.3% (11.2% to 26.6%)    |
| Ghana     | Physical violence by firearm                    | 0 (0 to 0)       | 0 (0 to 0)       | 43.9% (22.7% to 64.3%)    |
| Ghana     | Physical violence by other means                | 5 (3 to 8)       | 5 (3 to 8)       | -4.8% (-11.1% to 1.5%)    |
| Ghana     | Physical violence by sharp object               | 2 (1 to 3)       | 1 (1 to 3)       | -6.2% (-13.7% to 1.9%)    |
| Ghana     | Poisoning by carbon monoxide                    | 0 (0 to 0)       | 0 (0 to 0)       | 16.9% (5.6% to 29.6%)     |
| Ghana     | Poisoning by other means                        | 0 (0 to 0)       | 0 (0 to 0)       | -7.9% (-14.9% to -0.6%)   |
| Ghana     | Pulmonary aspiration and foreign body in airway | 0 (0 to 0)       | 0 (0 to 0)       | -6% (-14.3% to 2.5%)      |
| Ghana     | Self-harm by firearm                            | 0 (0 to 0)       | 0 (0 to 0)       | 34.8% (25.2% to 45.2%)    |
| Ghana     | Self-harm by other specified means              | 0 (0 to 0)       | 0 (0 to 0)       | 27.3% (19.5% to 35.6%)    |
| Ghana     | Unintentional firearm injuries                  | 1 (0 to 2)       | 1 (0 to 2)       | -9.1% (-17.2% to 0.4%)    |
| Ghana     | Venomous animal contact                         | 0 (0 to 1)       | 0 (0 to 1)       | -14.7% (-22.2% to -8.2%)  |
| Greece    | Adverse effects of medical treatment            | 0 (0 to 0)       | 0 (0 to 0)       | 0% (0% to 0%)             |
| Greece    | Conflict and terrorism                          | 0 (0 to 0)       | 0 (0 to 0)       | NA                        |
| Greece    | Cyclist road injuries                           | 22 (16 to 31)    | 20 (14 to 27)    | -12.8% (-23.5% to -0.4%)  |
| Greece    | Drowning                                        | 0 (0 to 0)       | 0 (0 to 0)       | 52.8% (40.7% to 66.7%)    |
| Greece    | Environmental heat and cold exposure            | 2 (2 to 3)       | 2 (1 to 3)       | -2.9% (-7.4% to 1.6%)     |
| Greece    | Executions and police conflict                  | 0 (0 to 0)       | 0 (0 to 0)       | NA                        |
| Greece    | Exposure to forces of nature                    | 0 (0 to 0)       | 0 (0 to 0)       | NA                        |
| Greece    | Falls                                           | 217 (166 to 284) | 201 (152 to 270) | -7% (-12.5% to -1.4%)     |
| Greece    | Fire, heat, and hot substances                  | 2 (1 to 4)       | 2 (1 to 3)       | -13.9% (-19.7% to -9.1%)  |
| Greece    | Foreign body in eyes                            | 0 (0 to 0)       | 0 (0 to 0)       | 0% (0% to 0.2%)           |
| Greece    | Foreign body in other body part                 | 2 (1 to 3)       | 2 (1 to 3)       | 0.6% (-4.1% to 5.3%)      |
| Greece    | Motor vehicle road injuries                     | 60 (48 to 75)    | 32 (25 to 41)    | -46.5% (-53.7% to -39.2%) |
| Greece    | Motorcyclist road injuries                      | 14 (11 to 19)    | 16 (13 to 21)    | 13.5% (-5.7% to 35%)      |
| Greece    | Non-venomous animal contact                     | 2 (1 to 4)       | 2 (1 to 4)       | -8.8% (-13% to -4.1%)     |
| Greece    | Other exposure to mechanical forces             | 44 (27 to 71)    | 45 (28 to 72)    | 2.7% (-1.7% to 7.8%)      |
| Greece    | Other road injuries                             | 1 (1 to 2)       | 1 (1 to 2)       | -11.7% (-23.2% to 0.8%)   |
| Greece    | Other transport injuries                        | 4 (3 to 6)       | 5 (4 to 7)       | 14.4% (8.3% to 21.4%)     |
| Greece    | Other unintentional injuries                    | 28 (18 to 44)    | 21 (13 to 33)    | -25.5% (-32.8% to -19.4%) |
| Greece    | Pedestrian road injuries                        | 13 (10 to 17)    | 8 (6 to 10)      | -40.7% (-48.3% to -32.4%) |
| Greece    | Physical violence by firearm                    | 1 (0 to 1)       | 1 (0 to 1)       | 12.6% (1.6% to 25.2%)     |
| Greece    | Physical violence by other means                | 15 (10 to 22)    | 14 (10 to 20)    | -4.4% (-10.1% to 2.3%)    |
| Greece    | Physical violence by sharp object               | 2 (1 to 3)       | 1 (1 to 2)       | -11% (-18.9% to -2.5%)    |
| Greece    | Poisoning by carbon monoxide                    | 0 (0 to 0)       | 0 (0 to 0)       | 3.8% (-4.1% to 11.5%)     |
| Greece    | Poisoning by other means                        | 0 (0 to 0)       | 0 (0 to 0)       | -7.4% (-13.3% to -2.4%)   |
| Greece    | Pulmonary aspiration and foreign body in airway | 1 (1 to 2)       | 1 (0 to 1)       | -40% (-47.2% to -30.8%)   |
| Greece    | Self-harm by firearm                            | 0 (0 to 0)       | 0 (0 to 0)       | 11.1% (-0.2% to 23.6%)    |
| Greece    | Self-harm by other specified means              | 1 (1 to 2)       | 1 (1 to 2)       | 6.2% (1.4% to 11.6%)      |
| Greece    | Unintentional firearm injuries                  | 1 (1 to 2)       | 1 (1 to 2)       | -14.1% (-21% to -6.5%)    |
| Greece    | Venomous animal contact                         | 1 (0 to 2)       | 1 (0 to 2)       | -7.7% (-13% to -2.3%)     |
| Greenland | Adverse effects of medical treatment            | 0 (0 to 0)       | 0 (0 to 0)       | 0% (0% to 0%)             |

|           |                                                 |                  |                 |                           |
|-----------|-------------------------------------------------|------------------|-----------------|---------------------------|
| Greenland | Conflict and terrorism                          | 0 (0 to 0)       | 0 (0 to 0)      | NA                        |
| Greenland | Cyclist road injuries                           | 8 (5 to 13)      | 7 (4 to 10)     | -19.1% (-28.7% to -8.1%)  |
| Greenland | Drowning                                        | 0 (0 to 0)       | 0 (0 to 0)      | -8.1% (-16.6% to 0.5%)    |
| Greenland | Environmental heat and cold exposure            | 2 (1 to 3)       | 1 (1 to 2)      | -35.8% (-40.2% to -31.2%) |
| Greenland | Executions and police conflict                  | 0 (0 to 0)       | 0 (0 to 0)      | NA                        |
| Greenland | Exposure to forces of nature                    | 0 (0 to 0)       | 0 (0 to 0)      | NA                        |
| Greenland | Falls                                           | 163 (108 to 241) | 136 (91 to 196) | -16.7% (-19.8% to -13.1%) |
| Greenland | Fire, heat, and hot substances                  | 1 (1 to 2)       | 1 (0 to 1)      | -43.6% (-47.3% to -39.7%) |
| Greenland | Foreign body in eyes                            | 0 (0 to 0)       | 0 (0 to 0)      | -0.7% (-1.4% to 0%)       |
| Greenland | Foreign body in other body part                 | 2 (1 to 3)       | 2 (1 to 3)      | 0.1% (-3.6% to 3.9%)      |
| Greenland | Motor vehicle road injuries                     | 33 (24 to 45)    | 25 (18 to 35)   | -24.6% (-31% to -17.9%)   |
| Greenland | Motorcyclist road injuries                      | 10 (7 to 15)     | 9 (6 to 13)     | -11.7% (-19.8% to -3%)    |
| Greenland | Non-venomous animal contact                     | 5 (2 to 9)       | 3 (1 to 5)      | -40.9% (-49.8% to -33.9%) |
| Greenland | Other exposure to mechanical forces             | 135 (69 to 249)  | 81 (41 to 147)  | -40.1% (-44.5% to -35.4%) |
| Greenland | Other road injuries                             | 1 (1 to 3)       | 1 (1 to 2)      | -26.4% (-36.4% to -16.1%) |
| Greenland | Other transport injuries                        | 26 (19 to 35)    | 15 (11 to 20)   | -44% (-47.3% to -40.2%)   |
| Greenland | Other unintentional injuries                    | 13 (8 to 23)     | 9 (6 to 16)     | -28.9% (-33.9% to -23.6%) |
| Greenland | Pedestrian road injuries                        | 10 (7 to 14)     | 6 (4 to 8)      | -40.5% (-46.7% to -33.2%) |
| Greenland | Physical violence by firearm                    | 1 (0 to 1)       | 1 (0 to 1)      | 4.4% (-8.2% to 18.9%)     |
| Greenland | Physical violence by other means                | 39 (25 to 59)    | 27 (18 to 41)   | -28.8% (-33.3% to -23.9%) |
| Greenland | Physical violence by sharp object               | 7 (3 to 12)      | 4 (2 to 8)      | -33.8% (-40.8% to -25.1%) |
| Greenland | Poisoning by carbon monoxide                    | 0 (0 to 0)       | 0 (0 to 0)      | -39.1% (-48.6% to -28.6%) |
| Greenland | Poisoning by other means                        | 0 (0 to 0)       | 0 (0 to 0)      | -34.7% (-40.7% to -28.6%) |
| Greenland | Pulmonary aspiration and foreign body in airway | 0 (0 to 0)       | 0 (0 to 0)      | -27.3% (-33% to -21.8%)   |
| Greenland | Self-harm by firearm                            | 1 (0 to 1)       | 0 (0 to 1)      | -31.6% (-38.9% to -23.9%) |
| Greenland | Self-harm by other specified means              | 2 (1 to 4)       | 2 (1 to 3)      | -24.4% (-28.6% to -19.5%) |
| Greenland | Unintentional firearm injuries                  | 4 (2 to 7)       | 1 (1 to 3)      | -62.1% (-67.8% to -55.7%) |
| Greenland | Venomous animal contact                         | 1 (0 to 2)       | 1 (0 to 1)      | -0.7% (-8.7% to 11.4%)    |
| Grenada   | Adverse effects of medical treatment            | 0 (0 to 0)       | 0 (0 to 0)      | 0% (0% to 0%)             |
| Grenada   | Conflict and terrorism                          | 0 (0 to 0)       | 0 (0 to 0)      | NA                        |
| Grenada   | Cyclist road injuries                           | 30 (21 to 39)    | 25 (18 to 34)   | -14.6% (-22.5% to -5.5%)  |
| Grenada   | Drowning                                        | 0 (0 to 1)       | 0 (0 to 1)      | 15.2% (3.8% to 27.8%)     |
| Grenada   | Environmental heat and cold exposure            | 12 (8 to 17)     | 13 (9 to 18)    | 8% (3.8% to 12.6%)        |
| Grenada   | Executions and police conflict                  | 0 (0 to 0)       | 0 (0 to 0)      | NA                        |
| Grenada   | Exposure to forces of nature                    | 0 (0 to 0)       | 0 (0 to 0)      | NA                        |
| Grenada   | Falls                                           | 50 (39 to 64)    | 83 (65 to 106)  | 66.4% (60.5% to 73.4%)    |
| Grenada   | Fire, heat, and hot substances                  | 5 (3 to 8)       | 4 (3 to 7)      | -10.5% (-16.7% to -3.9%)  |
| Grenada   | Foreign body in eyes                            | 0 (0 to 0)       | 0 (0 to 0)      | 1.6% (0.7% to 2.9%)       |
| Grenada   | Foreign body in other body part                 | 1 (1 to 2)       | 1 (1 to 3)      | 0.3% (-5.4% to 6.6%)      |
| Grenada   | Motor vehicle road injuries                     | 28 (21 to 36)    | 23 (17 to 30)   | -16.5% (-24.8% to -7%)    |
| Grenada   | Motorcyclist road injuries                      | 14 (11 to 19)    | 17 (13 to 22)   | 18.2% (5.4% to 34.8%)     |
| Grenada   | Non-venomous animal contact                     | 3 (2 to 6)       | 4 (2 to 7)      | 12.3% (2.9% to 24.9%)     |
| Grenada   | Other exposure to mechanical forces             | 47 (29 to 75)    | 62 (38 to 99)   | 31.3% (21.6% to 41.6%)    |

|         |                                                 |               |               |                           |
|---------|-------------------------------------------------|---------------|---------------|---------------------------|
| Grenada | Other road injuries                             | 4 (2 to 6)    | 3 (2 to 6)    | -8.8% (-18.1% to 2.3%)    |
| Grenada | Other transport injuries                        | 5 (4 to 7)    | 6 (4 to 7)    | 13% (6% to 21.7%)         |
| Grenada | Other unintentional injuries                    | 16 (10 to 26) | 16 (10 to 25) | -1.8% (-7.2% to 4%)       |
| Grenada | Pedestrian road injuries                        | 13 (10 to 18) | 10 (7 to 13)  | -25% (-31.9% to -16.7%)   |
| Grenada | Physical violence by firearm                    | 0 (0 to 1)    | 1 (0 to 1)    | 51.3% (34.8% to 72.5%)    |
| Grenada | Physical violence by other means                | 9 (6 to 13)   | 14 (10 to 20) | 55.3% (40.9% to 72%)      |
| Grenada | Physical violence by sharp object               | 2 (1 to 3)    | 2 (1 to 3)    | -0.3% (-9.9% to 11.9%)    |
| Grenada | Poisoning by carbon monoxide                    | 0 (0 to 0)    | 0 (0 to 0)    | 27.3% (7.3% to 48.9%)     |
| Grenada | Poisoning by other means                        | 0 (0 to 0)    | 0 (0 to 0)    | -35.8% (-47.3% to -24.1%) |
| Grenada | Pulmonary aspiration and foreign body in airway | 1 (0 to 1)    | 0 (0 to 1)    | -23.9% (-30.7% to -16.8%) |
| Grenada | Self-harm by firearm                            | 0 (0 to 0)    | 0 (0 to 0)    | 8.8% (-2.2% to 20.6%)     |
| Grenada | Self-harm by other specified means              | 0 (0 to 1)    | 0 (0 to 1)    | -12.5% (-19.3% to -5.2%)  |
| Grenada | Unintentional firearm injuries                  | 5 (3 to 8)    | 5 (3 to 8)    | 1.1% (-11.7% to 13.9%)    |
| Grenada | Venomous animal contact                         | 5 (2 to 10)   | 5 (2 to 9)    | -9.3% (-15.6% to -3.1%)   |
| Guam    | Adverse effects of medical treatment            | 0 (0 to 0)    | 0 (0 to 0)    | 0% (0% to 0%)             |
| Guam    | Conflict and terrorism                          | 0 (0 to 0)    | 0 (0 to 0)    | NA                        |
| Guam    | Cyclist road injuries                           | 8 (5 to 12)   | 7 (4 to 11)   | -4.8% (-12.6% to 4.5%)    |
| Guam    | Drowning                                        | 0 (0 to 0)    | 0 (0 to 0)    | -0.4% (-7.6% to 7.8%)     |
| Guam    | Environmental heat and cold exposure            | 0 (0 to 1)    | 0 (0 to 1)    | 1.2% (-4.8% to 8.1%)      |
| Guam    | Executions and police conflict                  | 0 (0 to 0)    | 0 (0 to 0)    | NA                        |
| Guam    | Exposure to forces of nature                    | 0 (0 to 0)    | 0 (0 to 0)    | NA                        |
| Guam    | Falls                                           | 29 (18 to 44) | 38 (23 to 59) | 31.8% (26.6% to 36.6%)    |
| Guam    | Fire, heat, and hot substances                  | 0 (0 to 0)    | 0 (0 to 1)    | 11.7% (5.7% to 18.2%)     |
| Guam    | Foreign body in eyes                            | 0 (0 to 0)    | 0 (0 to 0)    | -1.1% (-2% to -0.5%)      |
| Guam    | Foreign body in other body part                 | 1 (0 to 2)    | 1 (0 to 2)    | -2.9% (-8.5% to 2.8%)     |
| Guam    | Motor vehicle road injuries                     | 42 (30 to 58) | 28 (19 to 39) | -34.3% (-40.6% to -28.6%) |
| Guam    | Motorcyclist road injuries                      | 25 (18 to 34) | 26 (19 to 35) | 2.9% (-6.4% to 13.4%)     |
| Guam    | Non-venomous animal contact                     | 2 (1 to 4)    | 2 (1 to 3)    | -7.2% (-11% to -2.6%)     |
| Guam    | Other exposure to mechanical forces             | 25 (12 to 46) | 19 (9 to 36)  | -23.4% (-29.9% to -17.1%) |
| Guam    | Other road injuries                             | 2 (1 to 4)    | 2 (1 to 4)    | -4.2% (-14% to 6.9%)      |
| Guam    | Other transport injuries                        | 4 (2 to 5)    | 3 (2 to 5)    | -10% (-16.2% to -5.1%)    |
| Guam    | Other unintentional injuries                    | 2 (1 to 4)    | 2 (1 to 3)    | -3.8% (-9.7% to 2%)       |
| Guam    | Pedestrian road injuries                        | 19 (13 to 26) | 15 (10 to 21) | -21.1% (-28% to -13.4%)   |
| Guam    | Physical violence by firearm                    | 0 (0 to 1)    | 0 (0 to 0)    | -50.6% (-59.6% to -41.3%) |
| Guam    | Physical violence by other means                | 33 (22 to 50) | 29 (19 to 43) | -13.6% (-19.2% to -7.8%)  |
| Guam    | Physical violence by sharp object               | 3 (2 to 7)    | 2 (1 to 4)    | -48.6% (-56% to -41.6%)   |
| Guam    | Poisoning by carbon monoxide                    | 0 (0 to 0)    | 0 (0 to 0)    | 8.1% (-1.4% to 18%)       |
| Guam    | Poisoning by other means                        | 0 (0 to 0)    | 0 (0 to 0)    | -4.3% (-11.3% to 2.1%)    |
| Guam    | Pulmonary aspiration and foreign body in airway | 0 (0 to 0)    | 0 (0 to 0)    | -2.4% (-11.8% to 9.5%)    |
| Guam    | Self-harm by firearm                            | 0 (0 to 0)    | 0 (0 to 0)    | 9.7% (-1.2% to 21.7%)     |
| Guam    | Self-harm by other specified means              | 0 (0 to 1)    | 0 (0 to 1)    | 23.5% (12.3% to 37.5%)    |
| Guam    | Unintentional firearm injuries                  | 1 (1 to 3)    | 1 (0 to 2)    | -27.4% (-36.5% to -19%)   |
| Guam    | Venomous animal contact                         | 1 (0 to 2)    | 1 (0 to 1)    | -10.1% (-16.8% to -3.7%)  |



|           |                                                 |                 |                 |                           |
|-----------|-------------------------------------------------|-----------------|-----------------|---------------------------|
| Guatemala | Adverse effects of medical treatment            | 0 (0 to 0)      | 0 (0 to 0)      | 0% (0% to 0%)             |
| Guatemala | Conflict and terrorism                          | 59 (18 to 152)  | 0 (0 to 0)      | NA                        |
| Guatemala | Cyclist road injuries                           | 14 (10 to 20)   | 13 (9 to 18)    | -9.2% (-16.6% to -0.4%)   |
| Guatemala | Drowning                                        | 0 (0 to 0)      | 0 (0 to 0)      | -8% (-18.7% to 3.9%)      |
| Guatemala | Environmental heat and cold exposure            | 3 (2 to 4)      | 4 (3 to 5)      | 37.1% (26.3% to 48.4%)    |
| Guatemala | Executions and police conflict                  | 0 (0 to 0)      | 0 (0 to 0)      | NA                        |
| Guatemala | Exposure to forces of nature                    | 0 (0 to 0)      | 0 (0 to 0)      | NA                        |
| Guatemala | Falls                                           | 110 (87 to 142) | 120 (93 to 153) | 8.6% (4.4% to 13.4%)      |
| Guatemala | Fire, heat, and hot substances                  | 5 (3 to 8)      | 3 (2 to 6)      | -33.1% (-39.7% to -26.4%) |
| Guatemala | Foreign body in eyes                            | 0 (0 to 0)      | 0 (0 to 0)      | -1.6% (-3.1% to -0.6%)    |
| Guatemala | Foreign body in other body part                 | 4 (2 to 7)      | 2 (1 to 4)      | -46.3% (-52.8% to -38.5%) |
| Guatemala | Motor vehicle road injuries                     | 19 (14 to 24)   | 24 (18 to 30)   | 27.6% (15.8% to 41.2%)    |
| Guatemala | Motorcyclist road injuries                      | 7 (6 to 10)     | 10 (8 to 13)    | 38.1% (26% to 53%)        |
| Guatemala | Non-venomous animal contact                     | 6 (3 to 11)     | 5 (3 to 9)      | -20% (-24.4% to -15.5%)   |
| Guatemala | Other exposure to mechanical forces             | 42 (25 to 69)   | 64 (38 to 104)  | 52.4% (36.8% to 74.4%)    |
| Guatemala | Other road injuries                             | 4 (2 to 6)      | 4 (2 to 6)      | 0.9% (-10.7% to 14.4%)    |
| Guatemala | Other transport injuries                        | 3 (2 to 5)      | 4 (3 to 5)      | 22% (9.2% to 39.3%)       |
| Guatemala | Other unintentional injuries                    | 19 (12 to 30)   | 15 (10 to 24)   | -19.6% (-24.9% to -13.6%) |
| Guatemala | Pedestrian road injuries                        | 20 (15 to 25)   | 16 (12 to 19)   | -20.5% (-28.1% to -11.5%) |
| Guatemala | Physical violence by firearm                    | 1 (1 to 2)      | 6 (4 to 8)      | 334% (256.7% to 434.3%)   |
| Guatemala | Physical violence by other means                | 46 (34 to 64)   | 25 (17 to 37)   | -45.3% (-52.5% to -36.8%) |
| Guatemala | Physical violence by sharp object               | 7 (4 to 10)     | 8 (5 to 12)     | 17.2% (-1.5% to 39.4%)    |
| Guatemala | Poisoning by carbon monoxide                    | 0 (0 to 0)      | 0 (0 to 0)      | 41.4% (22% to 67%)        |
| Guatemala | Poisoning by other means                        | 0 (0 to 0)      | 0 (0 to 0)      | -2.4% (-9.7% to 4.9%)     |
| Guatemala | Pulmonary aspiration and foreign body in airway | 1 (1 to 2)      | 0 (0 to 1)      | -55.1% (-60.1% to -49.2%) |
| Guatemala | Self-harm by firearm                            | 0 (0 to 0)      | 0 (0 to 0)      | -29.5% (-42.8% to -17.2%) |
| Guatemala | Self-harm by other specified means              | 0 (0 to 1)      | 0 (0 to 1)      | 30.6% (18.6% to 44.2%)    |
| Guatemala | Unintentional firearm injuries                  | 5 (3 to 7)      | 10 (6 to 15)    | 98.2% (71.8% to 131.6%)   |
| Guatemala | Venomous animal contact                         | 8 (3 to 14)     | 6 (3 to 12)     | -14.4% (-18.2% to -9.9%)  |
| Guinea    | Adverse effects of medical treatment            | 0 (0 to 0)      | 0 (0 to 0)      | 0% (0% to 0%)             |
| Guinea    | Conflict and terrorism                          | 0 (0 to 0)      | 0 (0 to 1)      | NA                        |
| Guinea    | Cyclist road injuries                           | 24 (15 to 36)   | 29 (18 to 43)   | 22.7% (14% to 32.1%)      |
| Guinea    | Drowning                                        | 0 (0 to 0)      | 0 (0 to 0)      | -8.8% (-15.3% to -3.2%)   |
| Guinea    | Environmental heat and cold exposure            | 0 (0 to 1)      | 0 (0 to 1)      | 6% (0.7% to 13.4%)        |
| Guinea    | Executions and police conflict                  | 0 (0 to 0)      | 0 (0 to 0)      | NA                        |
| Guinea    | Exposure to forces of nature                    | 0 (0 to 0)      | 0 (0 to 0)      | NA                        |
| Guinea    | Falls                                           | 16 (11 to 25)   | 19 (12 to 28)   | 15% (10.8% to 18.8%)      |
| Guinea    | Fire, heat, and hot substances                  | 0 (0 to 0)      | 0 (0 to 0)      | -1% (-6.2% to 4.3%)       |
| Guinea    | Foreign body in eyes                            | 0 (0 to 0)      | 0 (0 to 0)      | -0.1% (-0.4% to 0.1%)     |
| Guinea    | Foreign body in other body part                 | 4 (2 to 8)      | 4 (2 to 8)      | -5.1% (-9.7% to 0.8%)     |
| Guinea    | Motor vehicle road injuries                     | 47 (32 to 65)   | 56 (39 to 77)   | 19.8% (10.5% to 30%)      |
| Guinea    | Motorcyclist road injuries                      | 22 (15 to 30)   | 28 (20 to 38)   | 26.7% (16.8% to 37.6%)    |
| Guinea    | Non-venomous animal contact                     | 3 (1 to 6)      | 3 (1 to 6)      | 0.9% (-3.9% to 6.2%)      |

|               |                                                 |               |               |                           |
|---------------|-------------------------------------------------|---------------|---------------|---------------------------|
| Guinea        | Other exposure to mechanical forces             | 27 (13 to 50) | 24 (12 to 44) | -11.2% (-16.5% to -6.5%)  |
| Guinea        | Other road injuries                             | 2 (1 to 4)    | 2 (1 to 4)    | 14.2% (4.9% to 24.1%)     |
| Guinea        | Other transport injuries                        | 3 (2 to 4)    | 3 (2 to 4)    | -3.8% (-9% to 2%)         |
| Guinea        | Other unintentional injuries                    | 3 (2 to 5)    | 3 (2 to 5)    | -14% (-18.7% to -9.2%)    |
| Guinea        | Pedestrian road injuries                        | 52 (39 to 68) | 60 (43 to 80) | 14.4% (6.6% to 21.7%)     |
| Guinea        | Physical violence by firearm                    | 0 (0 to 0)    | 0 (0 to 0)    | 29% (17.6% to 41.9%)      |
| Guinea        | Physical violence by other means                | 7 (5 to 11)   | 9 (6 to 13)   | 19.6% (12.3% to 27.2%)    |
| Guinea        | Physical violence by sharp object               | 2 (1 to 3)    | 2 (1 to 4)    | 15.1% (6.7% to 25.1%)     |
| Guinea        | Poisoning by carbon monoxide                    | 0 (0 to 0)    | 0 (0 to 0)    | 5.5% (-4.9% to 17.2%)     |
| Guinea        | Poisoning by other means                        | 0 (0 to 0)    | 0 (0 to 0)    | -12% (-19.3% to -4.9%)    |
| Guinea        | Pulmonary aspiration and foreign body in airway | 0 (0 to 0)    | 0 (0 to 0)    | -8.2% (-17.7% to 3.2%)    |
| Guinea        | Self-harm by firearm                            | 0 (0 to 0)    | 0 (0 to 0)    | 42% (32.1% to 54.2%)      |
| Guinea        | Self-harm by other specified means              | 0 (0 to 0)    | 0 (0 to 0)    | 29.1% (22.3% to 36.1%)    |
| Guinea        | Unintentional firearm injuries                  | 1 (0 to 2)    | 1 (0 to 2)    | -14.5% (-21.3% to -7.4%)  |
| Guinea        | Venomous animal contact                         | 0 (0 to 1)    | 0 (0 to 1)    | 2.5% (-4.4% to 10.6%)     |
| Guinea-Bissau | Adverse effects of medical treatment            | 0 (0 to 0)    | 0 (0 to 0)    | 0% (0% to 0%)             |
| Guinea-Bissau | Conflict and terrorism                          | 0 (0 to 0)    | 0 (0 to 0)    | NA                        |
| Guinea-Bissau | Cyclist road injuries                           | 31 (20 to 46) | 33 (21 to 49) | 6.1% (-1.7% to 14.6%)     |
| Guinea-Bissau | Drowning                                        | 0 (0 to 0)    | 0 (0 to 0)    | -23.7% (-28.7% to -18.1%) |
| Guinea-Bissau | Environmental heat and cold exposure            | 0 (0 to 1)    | 0 (0 to 1)    | 0.5% (-5.5% to 6.6%)      |
| Guinea-Bissau | Executions and police conflict                  | 0 (0 to 0)    | 0 (0 to 0)    | NA                        |
| Guinea-Bissau | Exposure to forces of nature                    | 0 (0 to 0)    | 0 (0 to 0)    | NA                        |
| Guinea-Bissau | Falls                                           | 18 (12 to 27) | 20 (13 to 29) | 6.9% (2.6% to 11%)        |
| Guinea-Bissau | Fire, heat, and hot substances                  | 0 (0 to 0)    | 0 (0 to 0)    | -11.9% (-17.3% to -6.1%)  |
| Guinea-Bissau | Foreign body in eyes                            | 0 (0 to 0)    | 0 (0 to 0)    | -0.4% (-1.1% to 0.1%)     |
| Guinea-Bissau | Foreign body in other body part                 | 4 (2 to 8)    | 3 (1 to 7)    | -4.5% (-9.2% to 0.8%)     |
| Guinea-Bissau | Motor vehicle road injuries                     | 62 (42 to 90) | 64 (43 to 92) | 3% (-4.9% to 10.9%)       |
| Guinea-Bissau | Motorcyclist road injuries                      | 34 (24 to 47) | 32 (23 to 44) | -4.8% (-11.4% to 3%)      |
| Guinea-Bissau | Non-venomous animal contact                     | 3 (1 to 6)    | 3 (1 to 6)    | -6.3% (-10.6% to -1.8%)   |
| Guinea-Bissau | Other exposure to mechanical forces             | 26 (13 to 47) | 22 (11 to 41) | -12.7% (-18.3% to -6.6%)  |
| Guinea-Bissau | Other road injuries                             | 2 (1 to 4)    | 2 (1 to 4)    | 2.8% (-6% to 13%)         |
| Guinea-Bissau | Other transport injuries                        | 4 (3 to 5)    | 3 (2 to 5)    | -15.1% (-20.4% to -9.4%)  |
| Guinea-Bissau | Other unintentional injuries                    | 3 (2 to 5)    | 3 (2 to 5)    | -17.3% (-22.2% to -12.3%) |
| Guinea-Bissau | Pedestrian road injuries                        | 72 (52 to 98) | 71 (50 to 95) | -2% (-8.2% to 4.6%)       |
| Guinea-Bissau | Physical violence by firearm                    | 0 (0 to 0)    | 0 (0 to 0)    | 14.7% (5.4% to 25.4%)     |
| Guinea-Bissau | Physical violence by other means                | 9 (6 to 13)   | 10 (6 to 15)  | 10.6% (4.5% to 17.5%)     |
| Guinea-Bissau | Physical violence by sharp object               | 2 (1 to 4)    | 2 (1 to 4)    | 8.5% (0.6% to 17.6%)      |
| Guinea-Bissau | Poisoning by carbon monoxide                    | 0 (0 to 0)    | 0 (0 to 0)    | 5% (-6.5% to 17.3%)       |
| Guinea-Bissau | Poisoning by other means                        | 0 (0 to 0)    | 0 (0 to 0)    | -22.5% (-29.2% to -15%)   |
| Guinea-Bissau | Pulmonary aspiration and foreign body in airway | 0 (0 to 0)    | 0 (0 to 0)    | -20.3% (-29.4% to -10.2%) |
| Guinea-Bissau | Self-harm by firearm                            | 0 (0 to 0)    | 0 (0 to 0)    | 14.7% (7.3% to 23.3%)     |
| Guinea-Bissau | Self-harm by other specified means              | 0 (0 to 0)    | 0 (0 to 0)    | 6.2% (0.6% to 12.1%)      |
| Guinea-Bissau | Unintentional firearm injuries                  | 1 (0 to 2)    | 1 (0 to 2)    | -20% (-27.2% to -12.3%)   |

|               |                                                 |                |                 |                           |
|---------------|-------------------------------------------------|----------------|-----------------|---------------------------|
| Guinea-Bissau | Venomous animal contact                         | 0 (0 to 1)     | 0 (0 to 1)      | -7.1% (-13.9% to 0.5%)    |
| Guyana        | Adverse effects of medical treatment            | 0 (0 to 0)     | 0 (0 to 0)      | 0% (0% to 0%)             |
| Guyana        | Conflict and terrorism                          | 0 (0 to 0)     | 0 (0 to 0)      | NA                        |
| Guyana        | Cyclist road injuries                           | 28 (20 to 37)  | 29 (21 to 39)   | 3.6% (-5.7% to 14.7%)     |
| Guyana        | Drowning                                        | 0 (0 to 1)     | 0 (0 to 1)      | 16.3% (5.9% to 27.1%)     |
| Guyana        | Environmental heat and cold exposure            | 15 (11 to 21)  | 15 (11 to 21)   | -1.9% (-6.3% to 2.4%)     |
| Guyana        | Executions and police conflict                  | 0 (0 to 0)     | 0 (0 to 0)      | NA                        |
| Guyana        | Exposure to forces of nature                    | 0 (0 to 0)     | 0 (0 to 0)      | NA                        |
| Guyana        | Falls                                           | 86 (69 to 108) | 106 (85 to 133) | 23.5% (18.9% to 28.3%)    |
| Guyana        | Fire, heat, and hot substances                  | 4 (3 to 7)     | 4 (2 to 6)      | -12.3% (-17.9% to -5.7%)  |
| Guyana        | Foreign body in eyes                            | 0 (0 to 0)     | 0 (0 to 0)      | -0.2% (-0.5% to 0.1%)     |
| Guyana        | Foreign body in other body part                 | 2 (1 to 5)     | 2 (1 to 3)      | -27.3% (-32.6% to -20.8%) |
| Guyana        | Motor vehicle road injuries                     | 22 (16 to 28)  | 27 (20 to 36)   | 25% (13.4% to 39.8%)      |
| Guyana        | Motorcyclist road injuries                      | 14 (10 to 18)  | 22 (17 to 29)   | 65.8% (47.7% to 87.9%)    |
| Guyana        | Non-venomous animal contact                     | 3 (2 to 6)     | 4 (2 to 6)      | 4% (-6% to 15.6%)         |
| Guyana        | Other exposure to mechanical forces             | 30 (18 to 48)  | 38 (22 to 62)   | 25.9% (19.3% to 33.2%)    |
| Guyana        | Other road injuries                             | 3 (2 to 5)     | 3 (2 to 5)      | 11.5% (0.6% to 23.8%)     |
| Guyana        | Other transport injuries                        | 7 (5 to 9)     | 8 (6 to 10)     | 11.4% (4.1% to 19.2%)     |
| Guyana        | Other unintentional injuries                    | 24 (16 to 38)  | 19 (12 to 29)   | -21.5% (-26.7% to -16.1%) |
| Guyana        | Pedestrian road injuries                        | 17 (13 to 21)  | 13 (10 to 17)   | -21% (-28.6% to -12.6%)   |
| Guyana        | Physical violence by firearm                    | 1 (0 to 1)     | 2 (1 to 2)      | 210.6% (169% to 263.8%)   |
| Guyana        | Physical violence by other means                | 15 (11 to 20)  | 17 (12 to 25)   | 18.5% (7.8% to 29.7%)     |
| Guyana        | Physical violence by sharp object               | 3 (2 to 5)     | 6 (3 to 9)      | 93.8% (68.7% to 128.5%)   |
| Guyana        | Poisoning by carbon monoxide                    | 0 (0 to 0)     | 0 (0 to 0)      | 26% (9.4% to 45.6%)       |
| Guyana        | Poisoning by other means                        | 0 (0 to 0)     | 0 (0 to 0)      | -11.2% (-21.8% to -1.1%)  |
| Guyana        | Pulmonary aspiration and foreign body in airway | 1 (0 to 1)     | 0 (0 to 1)      | -28.1% (-36.3% to -18.5%) |
| Guyana        | Self-harm by firearm                            | 0 (0 to 1)     | 1 (0 to 1)      | 33.7% (13.2% to 60.4%)    |
| Guyana        | Self-harm by other specified means              | 2 (1 to 3)     | 2 (1 to 3)      | 17.7% (9.1% to 26.5%)     |
| Guyana        | Unintentional firearm injuries                  | 3 (2 to 4)     | 3 (2 to 5)      | 19.7% (8.8% to 30.3%)     |
| Guyana        | Venomous animal contact                         | 8 (4 to 13)    | 12 (7 to 20)    | 55.8% (40.7% to 76.6%)    |
| Haiti         | Adverse effects of medical treatment            | 0 (0 to 0)     | 0 (0 to 0)      | 0% (0% to 0%)             |
| Haiti         | Conflict and terrorism                          | 1 (1 to 3)     | 0 (0 to 0)      | NA                        |
| Haiti         | Cyclist road injuries                           | 23 (16 to 31)  | 22 (15 to 30)   | -3.7% (-10% to 3.6%)      |
| Haiti         | Drowning                                        | 1 (0 to 1)     | 0 (0 to 1)      | -27.2% (-34.7% to -17.2%) |
| Haiti         | Environmental heat and cold exposure            | 18 (13 to 24)  | 16 (12 to 22)   | -9.8% (-13.3% to -5.9%)   |
| Haiti         | Executions and police conflict                  | 0 (0 to 0)     | 0 (0 to 0)      | NA                        |
| Haiti         | Exposure to forces of nature                    | 0 (0 to 0)     | 0 (0 to 0)      | NA                        |
| Haiti         | Falls                                           | 36 (28 to 46)  | 47 (37 to 60)   | 31.6% (26.2% to 36.7%)    |
| Haiti         | Fire, heat, and hot substances                  | 5 (3 to 8)     | 4 (2 to 6)      | -26.3% (-30.7% to -21.8%) |
| Haiti         | Foreign body in eyes                            | 0 (0 to 0)     | 0 (0 to 0)      | 0% (-0.5% to 0.4%)        |
| Haiti         | Foreign body in other body part                 | 1 (1 to 3)     | 1 (1 to 3)      | 2.5% (-3.3% to 10.5%)     |
| Haiti         | Motor vehicle road injuries                     | 17 (12 to 23)  | 17 (12 to 23)   | -1.4% (-8.5% to 6.5%)     |
| Haiti         | Motorcyclist road injuries                      | 16 (12 to 21)  | 18 (14 to 25)   | 17.7% (10.2% to 27.5%)    |

|          |                                                 |               |               |                           |
|----------|-------------------------------------------------|---------------|---------------|---------------------------|
| Haiti    | Non-venomous animal contact                     | 3 (2 to 6)    | 3 (2 to 6)    | 4.7% (-0.5% to 10.4%)     |
| Haiti    | Other exposure to mechanical forces             | 45 (26 to 77) | 45 (26 to 74) | -1.3% (-7.7% to 5.8%)     |
| Haiti    | Other road injuries                             | 2 (1 to 3)    | 2 (1 to 3)    | 7.3% (-1.3% to 17.3%)     |
| Haiti    | Other transport injuries                        | 6 (4 to 7)    | 5 (4 to 7)    | -6.1% (-10.6% to -1.1%)   |
| Haiti    | Other unintentional injuries                    | 16 (10 to 26) | 12 (8 to 20)  | -22% (-25.7% to -17.4%)   |
| Haiti    | Pedestrian road injuries                        | 13 (10 to 17) | 11 (8 to 14)  | -19.8% (-24.8% to -14.1%) |
| Haiti    | Physical violence by firearm                    | 1 (1 to 1)    | 1 (1 to 2)    | 26.7% (13.9% to 41.7%)    |
| Haiti    | Physical violence by other means                | 20 (14 to 28) | 19 (14 to 28) | -1.3% (-6.9% to 5.3%)     |
| Haiti    | Physical violence by sharp object               | 5 (3 to 8)    | 6 (4 to 9)    | 13.5% (4% to 25.2%)       |
| Haiti    | Poisoning by carbon monoxide                    | 0 (0 to 0)    | 0 (0 to 0)    | 15.4% (0.9% to 30.9%)     |
| Haiti    | Poisoning by other means                        | 0 (0 to 0)    | 0 (0 to 0)    | -21.7% (-28.3% to -15.1%) |
| Haiti    | Pulmonary aspiration and foreign body in airway | 1 (0 to 1)    | 0 (0 to 1)    | -35.6% (-43.4% to -27.6%) |
| Haiti    | Self-harm by firearm                            | 0 (0 to 0)    | 0 (0 to 0)    | -1.5% (-12.1% to 9.5%)    |
| Haiti    | Self-harm by other specified means              | 1 (0 to 1)    | 1 (0 to 1)    | -3.7% (-9.4% to 3.1%)     |
| Haiti    | Unintentional firearm injuries                  | 14 (9 to 20)  | 10 (6 to 15)  | -25.7% (-31.9% to -18.7%) |
| Haiti    | Venomous animal contact                         | 6 (3 to 11)   | 7 (3 to 12)   | 5% (0.5% to 9.8%)         |
| Honduras | Adverse effects of medical treatment            | 0 (0 to 0)    | 0 (0 to 0)    | 0% (0% to 0%)             |
| Honduras | Conflict and terrorism                          | 1 (0 to 1)    | 0 (0 to 0)    | NA                        |
| Honduras | Cyclist road injuries                           | 20 (13 to 28) | 16 (11 to 23) | -18% (-25.6% to -9.8%)    |
| Honduras | Drowning                                        | 0 (0 to 0)    | 0 (0 to 0)    | 9% (-3.5% to 24.9%)       |
| Honduras | Environmental heat and cold exposure            | 3 (2 to 4)    | 3 (2 to 4)    | 0.2% (-4.2% to 5%)        |
| Honduras | Executions and police conflict                  | 0 (0 to 0)    | 0 (0 to 0)    | NA                        |
| Honduras | Exposure to forces of nature                    | 0 (0 to 0)    | 0 (0 to 0)    | NA                        |
| Honduras | Falls                                           | 64 (49 to 85) | 71 (54 to 96) | 11.4% (6.1% to 17.3%)     |
| Honduras | Fire, heat, and hot substances                  | 3 (2 to 5)    | 3 (2 to 5)    | 1.3% (-6.4% to 9.2%)      |
| Honduras | Foreign body in eyes                            | 0 (0 to 0)    | 0 (0 to 0)    | -0.8% (-1.5% to -0.3%)    |
| Honduras | Foreign body in other body part                 | 1 (1 to 2)    | 1 (1 to 2)    | 1% (-4% to 6.6%)          |
| Honduras | Motor vehicle road injuries                     | 30 (23 to 39) | 31 (24 to 40) | 2.1% (-6.2% to 11.8%)     |
| Honduras | Motorcyclist road injuries                      | 9 (7 to 12)   | 10 (8 to 14)  | 13.9% (2.6% to 26.2%)     |
| Honduras | Non-venomous animal contact                     | 6 (4 to 11)   | 6 (3 to 11)   | -7.7% (-13.5% to -1.8%)   |
| Honduras | Other exposure to mechanical forces             | 48 (29 to 79) | 44 (26 to 70) | -9.9% (-17.1% to -0.4%)   |
| Honduras | Other road injuries                             | 5 (3 to 8)    | 4 (2 to 7)    | -17.2% (-25% to -8.1%)    |
| Honduras | Other transport injuries                        | 4 (3 to 5)    | 4 (3 to 5)    | -4% (-10% to 2.2%)        |
| Honduras | Other unintentional injuries                    | 19 (12 to 30) | 14 (9 to 22)  | -27.4% (-33.5% to -20.7%) |
| Honduras | Pedestrian road injuries                        | 27 (21 to 33) | 20 (16 to 26) | -24.2% (-31.3% to -16.3%) |
| Honduras | Physical violence by firearm                    | 2 (2 to 3)    | 6 (4 to 9)    | 170.6% (133.6% to 218.7%) |
| Honduras | Physical violence by other means                | 38 (27 to 54) | 57 (40 to 82) | 50.9% (37.3% to 66.6%)    |
| Honduras | Physical violence by sharp object               | 11 (7 to 16)  | 18 (12 to 27) | 66.5% (47.6% to 89.5%)    |
| Honduras | Poisoning by carbon monoxide                    | 0 (0 to 0)    | 0 (0 to 0)    | 43.7% (23.7% to 65.2%)    |
| Honduras | Poisoning by other means                        | 0 (0 to 0)    | 0 (0 to 0)    | -18% (-27.4% to -8.2%)    |
| Honduras | Pulmonary aspiration and foreign body in airway | 0 (0 to 1)    | 0 (0 to 1)    | -10.4% (-22.4% to 2.4%)   |
| Honduras | Self-harm by firearm                            | 0 (0 to 0)    | 0 (0 to 0)    | -17.5% (-28.7% to -5.6%)  |
| Honduras | Self-harm by other specified means              | 0 (0 to 0)    | 0 (0 to 0)    | -11% (-20.2% to -1.1%)    |

|          |                                                 |                  |                  |                           |
|----------|-------------------------------------------------|------------------|------------------|---------------------------|
| Honduras | Unintentional firearm injuries                  | 5 (3 to 8)       | 3 (2 to 5)       | -34.2% (-41.2% to -26.8%) |
| Honduras | Venomous animal contact                         | 8 (4 to 15)      | 7 (4 to 14)      | -11.3% (-16.5% to -6.5%)  |
| Hungary  | Adverse effects of medical treatment            | 0 (0 to 0)       | 0 (0 to 0)       | 0% (0% to 0%)             |
| Hungary  | Conflict and terrorism                          | 0 (0 to 0)       | 0 (0 to 0)       | NA                        |
| Hungary  | Cyclist road injuries                           | 90 (68 to 116)   | 57 (42 to 77)    | -36.1% (-43.8% to -27.9%) |
| Hungary  | Drowning                                        | 0 (0 to 0)       | 0 (0 to 1)       | 58.2% (36% to 83.4%)      |
| Hungary  | Environmental heat and cold exposure            | 3 (2 to 4)       | 2 (2 to 3)       | -17.3% (-21.6% to -13%)   |
| Hungary  | Executions and police conflict                  | 0 (0 to 0)       | 0 (0 to 0)       | NA                        |
| Hungary  | Exposure to forces of nature                    | 0 (0 to 0)       | 0 (0 to 0)       | NA                        |
| Hungary  | Falls                                           | 448 (364 to 561) | 329 (255 to 421) | -26.6% (-32.2% to -20.2%) |
| Hungary  | Fire, heat, and hot substances                  | 4 (3 to 7)       | 4 (2 to 6)       | -19.2% (-26.6% to -12.9%) |
| Hungary  | Foreign body in eyes                            | 0 (0 to 0)       | 0 (0 to 0)       | 0.4% (0.2% to 0.8%)       |
| Hungary  | Foreign body in other body part                 | 2 (1 to 5)       | 2 (1 to 5)       | 0.5% (-4.9% to 6.3%)      |
| Hungary  | Motor vehicle road injuries                     | 126 (98 to 159)  | 80 (62 to 101)   | -36.6% (-43.8% to -27.8%) |
| Hungary  | Motorcyclist road injuries                      | 20 (15 to 26)    | 14 (10 to 19)    | -29.3% (-42.6% to -14.5%) |
| Hungary  | Non-venomous animal contact                     | 6 (3 to 11)      | 5 (3 to 9)       | -16.1% (-20.5% to -11.8%) |
| Hungary  | Other exposure to mechanical forces             | 136 (84 to 213)  | 130 (80 to 204)  | -4.4% (-10.7% to 0.7%)    |
| Hungary  | Other road injuries                             | 1 (1 to 2)       | 1 (1 to 2)       | -9.3% (-20.3% to 1.9%)    |
| Hungary  | Other transport injuries                        | 7 (5 to 9)       | 6 (4 to 8)       | -16.2% (-23.9% to -10%)   |
| Hungary  | Other unintentional injuries                    | 32 (20 to 53)    | 28 (17 to 47)    | -11.9% (-19% to -4.4%)    |
| Hungary  | Pedestrian road injuries                        | 41 (32 to 52)    | 25 (19 to 33)    | -38.6% (-47.2% to -29.1%) |
| Hungary  | Physical violence by firearm                    | 0 (0 to 0)       | 0 (0 to 1)       | 72.1% (52.4% to 93.1%)    |
| Hungary  | Physical violence by other means                | 30 (21 to 42)    | 24 (16 to 33)    | -21.2% (-28.7% to -12.9%) |
| Hungary  | Physical violence by sharp object               | 3 (2 to 5)       | 2 (1 to 3)       | -40.2% (-50.4% to -29.6%) |
| Hungary  | Poisoning by carbon monoxide                    | 0 (0 to 0)       | 0 (0 to 0)       | 30.9% (19% to 45.1%)      |
| Hungary  | Poisoning by other means                        | 0 (0 to 1)       | 0 (0 to 1)       | -4% (-11.6% to 3.7%)      |
| Hungary  | Pulmonary aspiration and foreign body in airway | 1 (1 to 2)       | 1 (1 to 2)       | -18.9% (-25.4% to -11.4%) |
| Hungary  | Self-harm by firearm                            | 1 (0 to 1)       | 1 (0 to 1)       | -14.8% (-26.8% to 1.3%)   |
| Hungary  | Self-harm by other specified means              | 6 (4 to 9)       | 3 (2 to 5)       | -43.6% (-47% to -40%)     |
| Hungary  | Unintentional firearm injuries                  | 1 (1 to 2)       | 1 (1 to 2)       | -0.5% (-9.6% to 9.1%)     |
| Hungary  | Venomous animal contact                         | 5 (2 to 9)       | 4 (2 to 8)       | -15.4% (-20.1% to -10.1%) |
| Iceland  | Adverse effects of medical treatment            | 0 (0 to 0)       | 0 (0 to 0)       | 0% (0% to 0%)             |
| Iceland  | Conflict and terrorism                          | 0 (0 to 0)       | 0 (0 to 0)       | NA                        |
| Iceland  | Cyclist road injuries                           | 21 (15 to 29)    | 16 (11 to 21)    | -25.8% (-34.6% to -16.1%) |
| Iceland  | Drowning                                        | 0 (0 to 0)       | 0 (0 to 0)       | 22.5% (11.1% to 35%)      |
| Iceland  | Environmental heat and cold exposure            | 2 (1 to 3)       | 2 (1 to 3)       | -4.3% (-9.2% to 0.2%)     |
| Iceland  | Executions and police conflict                  | 0 (0 to 0)       | 0 (0 to 0)       | NA                        |
| Iceland  | Exposure to forces of nature                    | 0 (0 to 0)       | 0 (0 to 0)       | NA                        |
| Iceland  | Falls                                           | 230 (179 to 296) | 258 (199 to 334) | 12.4% (8.6% to 17%)       |
| Iceland  | Fire, heat, and hot substances                  | 2 (1 to 4)       | 2 (1 to 4)       | -11.2% (-16.4% to -6.7%)  |
| Iceland  | Foreign body in eyes                            | 0 (0 to 0)       | 0 (0 to 0)       | 0.4% (0.2% to 0.8%)       |
| Iceland  | Foreign body in other body part                 | 2 (1 to 3)       | 2 (1 to 3)       | 1.3% (-3.1% to 6.3%)      |
| Iceland  | Motor vehicle road injuries                     | 42 (32 to 53)    | 19 (14 to 25)    | -54.3% (-59.9% to -48.4%) |

|         |                                                 |                  |                  |                           |
|---------|-------------------------------------------------|------------------|------------------|---------------------------|
| Iceland | Motorcyclist road injuries                      | 6 (5 to 8)       | 6 (4 to 8)       | -9% (-21.8% to 3.9%)      |
| Iceland | Non-venomous animal contact                     | 2 (1 to 4)       | 2 (1 to 4)       | -9.6% (-13.5% to -5.7%)   |
| Iceland | Other exposure to mechanical forces             | 51 (32 to 81)    | 45 (27 to 72)    | -12.8% (-19.8% to -6.6%)  |
| Iceland | Other road injuries                             | 1 (1 to 2)       | 1 (1 to 2)       | -19.4% (-29% to -7.4%)    |
| Iceland | Other transport injuries                        | 11 (8 to 14)     | 8 (6 to 10)      | -25.4% (-31% to -19.1%)   |
| Iceland | Other unintentional injuries                    | 24 (15 to 39)    | 21 (13 to 35)    | -11.3% (-16.9% to -6.1%)  |
| Iceland | Pedestrian road injuries                        | 9 (6 to 11)      | 6 (4 to 8)       | -34.9% (-44% to -24.2%)   |
| Iceland | Physical violence by firearm                    | 1 (0 to 1)       | 1 (0 to 1)       | 29.6% (18% to 43.2%)      |
| Iceland | Physical violence by other means                | 16 (11 to 22)    | 14 (10 to 21)    | -9% (-14.9% to -2.4%)     |
| Iceland | Physical violence by sharp object               | 1 (1 to 2)       | 1 (1 to 2)       | -7.9% (-16.4% to 1.3%)    |
| Iceland | Poisoning by carbon monoxide                    | 0 (0 to 0)       | 0 (0 to 0)       | -0.2% (-6.8% to 7.7%)     |
| Iceland | Poisoning by other means                        | 0 (0 to 0)       | 0 (0 to 0)       | -10% (-15.3% to -4.9%)    |
| Iceland | Pulmonary aspiration and foreign body in airway | 1 (1 to 2)       | 1 (1 to 2)       | -10.6% (-19.6% to 0.1%)   |
| Iceland | Self-harm by firearm                            | 1 (0 to 1)       | 0 (0 to 1)       | -35.7% (-44.3% to -25.7%) |
| Iceland | Self-harm by other specified means              | 4 (2 to 5)       | 3 (2 to 4)       | -26.6% (-30.9% to -22.1%) |
| Iceland | Unintentional firearm injuries                  | 1 (0 to 2)       | 1 (1 to 2)       | 5.8% (-2.8% to 16%)       |
| Iceland | Venomous animal contact                         | 1 (0 to 2)       | 1 (0 to 2)       | -10.1% (-15.2% to -4.4%)  |
| India   | Adverse effects of medical treatment            | 0 (0 to 0)       | 0 (0 to 0)       | 0% (0% to 0%)             |
| India   | Conflict and terrorism                          | 9 (4 to 20)      | 0 (0 to 1)       | NA                        |
| India   | Cyclist road injuries                           | 79 (57 to 107)   | 90 (65 to 123)   | 14.1% (10.4% to 18%)      |
| India   | Drowning                                        | 0 (0 to 1)       | 0 (0 to 1)       | -31.2% (-34.7% to -27.1%) |
| India   | Environmental heat and cold exposure            | 4 (3 to 5)       | 4 (3 to 5)       | -5% (-8.1% to -1.7%)      |
| India   | Executions and police conflict                  | 0 (0 to 0)       | 0 (0 to 0)       | NA                        |
| India   | Exposure to forces of nature                    | 1 (1 to 2)       | 0 (0 to 0)       | NA                        |
| India   | Falls                                           | 160 (126 to 204) | 179 (140 to 226) | 11.7% (8.3% to 15.2%)     |
| India   | Fire, heat, and hot substances                  | 1 (0 to 2)       | 1 (0 to 1)       | -11.3% (-14.5% to -8.3%)  |
| India   | Foreign body in eyes                            | 0 (0 to 0)       | 0 (0 to 0)       | -0.9% (-1.6% to -0.4%)    |
| India   | Foreign body in other body part                 | 1 (1 to 3)       | 1 (1 to 3)       | -1.7% (-3.7% to 0.4%)     |
| India   | Motor vehicle road injuries                     | 45 (32 to 60)    | 57 (40 to 76)    | 27% (22.7% to 31.1%)      |
| India   | Motorcyclist road injuries                      | 53 (40 to 70)    | 83 (63 to 110)   | 57.6% (51.6% to 62.9%)    |
| India   | Non-venomous animal contact                     | 14 (8 to 24)     | 10 (6 to 17)     | -30.1% (-33.2% to -26.7%) |
| India   | Other exposure to mechanical forces             | 11 (6 to 18)     | 10 (6 to 17)     | -3.9% (-8.5% to 0.9%)     |
| India   | Other road injuries                             | 2 (1 to 3)       | 2 (1 to 4)       | 14.9% (10.7% to 18.8%)    |
| India   | Other transport injuries                        | 7 (5 to 9)       | 7 (5 to 9)       | 3.4% (-0.2% to 6.6%)      |
| India   | Other unintentional injuries                    | 14 (9 to 23)     | 12 (8 to 18)     | -18.9% (-21.9% to -15.7%) |
| India   | Pedestrian road injuries                        | 53 (39 to 68)    | 61 (45 to 80)    | 15.6% (10.9% to 19.7%)    |
| India   | Physical violence by firearm                    | 0 (0 to 0)       | 0 (0 to 0)       | -7.4% (-14% to -0.2%)     |
| India   | Physical violence by other means                | 29 (21 to 41)    | 26 (18 to 36)    | -11.5% (-13.2% to -9.8%)  |
| India   | Physical violence by sharp object               | 1 (1 to 2)       | 1 (1 to 2)       | -15.3% (-19.8% to -10.3%) |
| India   | Poisoning by carbon monoxide                    | 0 (0 to 0)       | 0 (0 to 0)       | 8.3% (-1.7% to 17.2%)     |
| India   | Poisoning by other means                        | 0 (0 to 0)       | 0 (0 to 0)       | 2.2% (-6.6% to 9.5%)      |
| India   | Pulmonary aspiration and foreign body in airway | 1 (0 to 1)       | 0 (0 to 1)       | -18.6% (-22.1% to -15.1%) |
| India   | Self-harm by firearm                            | 1 (0 to 1)       | 0 (0 to 1)       | -1.9% (-7.3% to 2.7%)     |



|                            |                                                 |                  |                |                           |
|----------------------------|-------------------------------------------------|------------------|----------------|---------------------------|
| India                      | Self-harm by other specified means              | 3 (2 to 6)       | 3 (1 to 4)     | -25.7% (-29.2% to -22.1%) |
| India                      | Unintentional firearm injuries                  | 1 (0 to 1)       | 1 (0 to 1)     | -5% (-9.8% to -0.2%)      |
| India                      | Venomous animal contact                         | 9 (4 to 18)      | 5 (2 to 10)    | -48.4% (-53.5% to -44.3%) |
| Indonesia                  | Adverse effects of medical treatment            | 0 (0 to 0)       | 0 (0 to 0)     | 0% (0% to 0%)             |
| Indonesia                  | Conflict and terrorism                          | 1 (0 to 1)       | 0 (0 to 0)     | NA                        |
| Indonesia                  | Cyclist road injuries                           | 13 (7 to 20)     | 11 (7 to 18)   | -11.2% (-17.1% to -5.6%)  |
| Indonesia                  | Drowning                                        | 0 (0 to 0)       | 0 (0 to 0)     | -8.9% (-14.9% to -2.9%)   |
| Indonesia                  | Environmental heat and cold exposure            | 1 (0 to 1)       | 0 (0 to 1)     | -12.6% (-17% to -8.3%)    |
| Indonesia                  | Executions and police conflict                  | 0 (0 to 0)       | 0 (0 to 0)     | NA                        |
| Indonesia                  | Exposure to forces of nature                    | 1 (0 to 1)       | 0 (0 to 1)     | NA                        |
| Indonesia                  | Falls                                           | 38 (24 to 57)    | 36 (23 to 54)  | -5.4% (-7.6% to -3.2%)    |
| Indonesia                  | Fire, heat, and hot substances                  | 0 (0 to 0)       | 0 (0 to 0)     | 2.8% (-1.8% to 7.1%)      |
| Indonesia                  | Foreign body in eyes                            | 0 (0 to 0)       | 0 (0 to 0)     | 0.5% (0.2% to 0.9%)       |
| Indonesia                  | Foreign body in other body part                 | 2 (1 to 4)       | 2 (1 to 3)     | -8.7% (-10.7% to -6.5%)   |
| Indonesia                  | Motor vehicle road injuries                     | 29 (18 to 42)    | 20 (12 to 30)  | -31% (-35.6% to -27%)     |
| Indonesia                  | Motorcyclist road injuries                      | 52 (38 to 69)    | 52 (38 to 69)  | 0.5% (-4.5% to 6.2%)      |
| Indonesia                  | Non-venomous animal contact                     | 3 (1 to 6)       | 2 (1 to 4)     | -37.4% (-43.2% to -32.7%) |
| Indonesia                  | Other exposure to mechanical forces             | 32 (15 to 60)    | 28 (13 to 54)  | -12.5% (-18.9% to -6.5%)  |
| Indonesia                  | Other road injuries                             | 2 (1 to 4)       | 2 (1 to 4)     | -18.5% (-28% to -9.4%)    |
| Indonesia                  | Other transport injuries                        | 5 (3 to 7)       | 3 (2 to 4)     | -44.4% (-50.5% to -38.4%) |
| Indonesia                  | Other unintentional injuries                    | 6 (3 to 11)      | 5 (3 to 10)    | -9.5% (-19.5% to -2%)     |
| Indonesia                  | Pedestrian road injuries                        | 24 (17 to 34)    | 14 (10 to 20)  | -41.3% (-44.6% to -38.4%) |
| Indonesia                  | Physical violence by firearm                    | 0 (0 to 0)       | 0 (0 to 0)     | 38.9% (27.6% to 50.5%)    |
| Indonesia                  | Physical violence by other means                | 10 (6 to 16)     | 11 (7 to 16)   | 4.9% (-0.9% to 10.8%)     |
| Indonesia                  | Physical violence by sharp object               | 2 (1 to 3)       | 2 (1 to 3)     | -4.4% (-11.4% to 1.9%)    |
| Indonesia                  | Poisoning by carbon monoxide                    | 0 (0 to 0)       | 0 (0 to 0)     | 1% (-2.6% to 5.6%)        |
| Indonesia                  | Poisoning by other means                        | 0 (0 to 0)       | 0 (0 to 0)     | -12.7% (-15% to -10.1%)   |
| Indonesia                  | Pulmonary aspiration and foreign body in airway | 0 (0 to 0)       | 0 (0 to 0)     | -35.8% (-41.8% to -28.8%) |
| Indonesia                  | Self-harm by firearm                            | 0 (0 to 0)       | 0 (0 to 0)     | -21.1% (-26.4% to -16.3%) |
| Indonesia                  | Self-harm by other specified means              | 0 (0 to 0)       | 0 (0 to 0)     | -14.4% (-17.7% to -10.6%) |
| Indonesia                  | Unintentional firearm injuries                  | 2 (1 to 4)       | 1 (1 to 3)     | -15.1% (-22.1% to -8.7%)  |
| Indonesia                  | Venomous animal contact                         | 0 (0 to 1)       | 0 (0 to 1)     | 6.9% (-5.8% to 25.8%)     |
| Iran (Islamic Republic of) | Adverse effects of medical treatment            | 0 (0 to 0)       | 0 (0 to 0)     | 0% (0% to 0%)             |
| Iran (Islamic Republic of) | Conflict and terrorism                          | 16 (6 to 39)     | 0 (0 to 1)     | NA                        |
| Iran (Islamic Republic of) | Cyclist road injuries                           | 19 (13 to 28)    | 16 (11 to 23)  | -16.5% (-21.7% to -11.6%) |
| Iran (Islamic Republic of) | Drowning                                        | 1 (0 to 1)       | 0 (0 to 0)     | -57.3% (-62% to -52.4%)   |
| Iran (Islamic Republic of) | Environmental heat and cold exposure            | 3 (2 to 5)       | 3 (2 to 5)     | 6.9% (5.3% to 8.7%)       |
| Iran (Islamic Republic of) | Executions and police conflict                  | 4 (2 to 8)       | 0 (0 to 0)     | NA                        |
| Iran (Islamic Republic of) | Exposure to forces of nature                    | 494 (301 to 754) | 1 (1 to 2)     | NA                        |
| Iran (Islamic Republic of) | Falls                                           | 98 (74 to 131)   | 94 (73 to 124) | -3.3% (-6.3% to 0.2%)     |
| Iran (Islamic Republic of) | Fire, heat, and hot substances                  | 1 (1 to 2)       | 1 (0 to 1)     | -34.4% (-37.7% to -31.2%) |
| Iran (Islamic Republic of) | Foreign body in eyes                            | 0 (0 to 0)       | 0 (0 to 0)     | -0.1% (-0.7% to 0.3%)     |
| Iran (Islamic Republic of) | Foreign body in other body part                 | 2 (1 to 3)       | 2 (1 to 3)     | 0.5% (-0.8% to 1.6%)      |

|                            |                                                 |                |                |                           |
|----------------------------|-------------------------------------------------|----------------|----------------|---------------------------|
| Iran (Islamic Republic of) | Motor vehicle road injuries                     | 52 (39 to 68)  | 33 (25 to 44)  | -35.7% (-38.2% to -33%)   |
| Iran (Islamic Republic of) | Motorcyclist road injuries                      | 23 (17 to 31)  | 15 (11 to 20)  | -37.4% (-40.3% to -34.5%) |
| Iran (Islamic Republic of) | Non-venomous animal contact                     | 4 (2 to 7)     | 4 (2 to 6)     | -6.8% (-9.7% to -3.6%)    |
| Iran (Islamic Republic of) | Other exposure to mechanical forces             | 32 (20 to 51)  | 27 (17 to 44)  | -15% (-17.2% to -13.2%)   |
| Iran (Islamic Republic of) | Other road injuries                             | 2 (1 to 3)     | 2 (1 to 3)     | 3% (-2.5% to 8.8%)        |
| Iran (Islamic Republic of) | Other transport injuries                        | 7 (5 to 9)     | 7 (5 to 9)     | 3.1% (1% to 5.4%)         |
| Iran (Islamic Republic of) | Other unintentional injuries                    | 17 (11 to 28)  | 15 (9 to 24)   | -15.6% (-19.1% to -11.8%) |
| Iran (Islamic Republic of) | Pedestrian road injuries                        | 34 (25 to 44)  | 25 (18 to 32)  | -27.9% (-31% to -25.2%)   |
| Iran (Islamic Republic of) | Physical violence by firearm                    | 0 (0 to 1)     | 1 (0 to 1)     | 55.1% (45% to 65.8%)      |
| Iran (Islamic Republic of) | Physical violence by other means                | 14 (10 to 20)  | 15 (10 to 22)  | 6.5% (3.4% to 9.4%)       |
| Iran (Islamic Republic of) | Physical violence by sharp object               | 1 (1 to 2)     | 2 (1 to 2)     | 19% (11.4% to 26.7%)      |
| Iran (Islamic Republic of) | Poisoning by carbon monoxide                    | 0 (0 to 0)     | 0 (0 to 0)     | -36.8% (-45.2% to -28.6%) |
| Iran (Islamic Republic of) | Poisoning by other means                        | 0 (0 to 0)     | 0 (0 to 0)     | -36.1% (-42.1% to -30.3%) |
| Iran (Islamic Republic of) | Pulmonary aspiration and foreign body in airway | 0 (0 to 1)     | 0 (0 to 1)     | -25.2% (-31.3% to -19.1%) |
| Iran (Islamic Republic of) | Self-harm by firearm                            | 0 (0 to 0)     | 0 (0 to 0)     | 9.5% (3.8% to 15.6%)      |
| Iran (Islamic Republic of) | Self-harm by other specified means              | 2 (1 to 3)     | 1 (1 to 2)     | -17.2% (-20.2% to -13.9%) |
| Iran (Islamic Republic of) | Unintentional firearm injuries                  | 2 (1 to 3)     | 1 (1 to 2)     | -12.3% (-15.3% to -9%)    |
| Iran (Islamic Republic of) | Venomous animal contact                         | 2 (1 to 5)     | 2 (1 to 4)     | -14.9% (-19.8% to -11.6%) |
| Iraq                       | Adverse effects of medical treatment            | 0 (0 to 0)     | 0 (0 to 0)     | 0% (0% to 0%)             |
| Iraq                       | Conflict and terrorism                          | 71 (29 to 161) | 25 (10 to 57)  | NA                        |
| Iraq                       | Cyclist road injuries                           | 15 (10 to 21)  | 13 (9 to 19)   | -10.2% (-17.5% to -1.2%)  |
| Iraq                       | Drowning                                        | 0 (0 to 0)     | 0 (0 to 0)     | 29.8% (13.7% to 47.3%)    |
| Iraq                       | Environmental heat and cold exposure            | 3 (2 to 4)     | 3 (2 to 4)     | 2.3% (-3.3% to 8.5%)      |
| Iraq                       | Executions and police conflict                  | 0 (0 to 0)     | 0 (0 to 0)     | NA                        |
| Iraq                       | Exposure to forces of nature                    | 0 (0 to 0)     | 0 (0 to 0)     | NA                        |
| Iraq                       | Falls                                           | 79 (61 to 105) | 85 (64 to 112) | 6.7% (1.2% to 12%)        |
| Iraq                       | Fire, heat, and hot substances                  | 1 (1 to 2)     | 1 (0 to 1)     | -26.5% (-32.3% to -20.4%) |
| Iraq                       | Foreign body in eyes                            | 0 (0 to 0)     | 0 (0 to 0)     | 0% (-0.1% to 0.2%)        |
| Iraq                       | Foreign body in other body part                 | 1 (1 to 3)     | 1 (1 to 3)     | 3.9% (-1% to 7.9%)        |
| Iraq                       | Motor vehicle road injuries                     | 32 (25 to 41)  | 27 (20 to 34)  | -17.8% (-24.2% to -10.6%) |
| Iraq                       | Motorcyclist road injuries                      | 9 (7 to 12)    | 8 (6 to 10)    | -15% (-22.5% to -6%)      |
| Iraq                       | Non-venomous animal contact                     | 4 (2 to 7)     | 3 (2 to 6)     | -15.9% (-23.6% to -8.9%)  |
| Iraq                       | Other exposure to mechanical forces             | 74 (46 to 116) | 60 (38 to 95)  | -19.3% (-25% to -12.7%)   |
| Iraq                       | Other road injuries                             | 2 (1 to 3)     | 2 (1 to 3)     | -5.6% (-14.7% to 4.9%)    |
| Iraq                       | Other transport injuries                        | 5 (3 to 6)     | 5 (4 to 7)     | 5.5% (0.1% to 12%)        |
| Iraq                       | Other unintentional injuries                    | 40 (26 to 64)  | 29 (19 to 46)  | -28.4% (-33.2% to -23.2%) |
| Iraq                       | Pedestrian road injuries                        | 24 (18 to 30)  | 17 (13 to 21)  | -31.1% (-36.6% to -25%)   |
| Iraq                       | Physical violence by firearm                    | 1 (0 to 1)     | 2 (1 to 2)     | 219.1% (183.8% to 263.1%) |
| Iraq                       | Physical violence by other means                | 25 (18 to 35)  | 32 (23 to 44)  | 28.2% (18.4% to 40.1%)    |
| Iraq                       | Physical violence by sharp object               | 2 (1 to 3)     | 2 (1 to 4)     | 18% (4.8% to 33.2%)       |
| Iraq                       | Poisoning by carbon monoxide                    | 0 (0 to 0)     | 0 (0 to 0)     | 44.4% (29.8% to 60.4%)    |
| Iraq                       | Poisoning by other means                        | 0 (0 to 0)     | 0 (0 to 0)     | -5.9% (-13.3% to 2.3%)    |
| Iraq                       | Pulmonary aspiration and foreign body in airway | 0 (0 to 1)     | 0 (0 to 0)     | -22.3% (-30.7% to -14.2%) |

|         |                                                 |                  |                  |                           |
|---------|-------------------------------------------------|------------------|------------------|---------------------------|
| Iraq    | Self-harm by firearm                            | 0 (0 to 1)       | 0 (0 to 1)       | 17.4% (4.6% to 32.2%)     |
| Iraq    | Self-harm by other specified means              | 1 (1 to 2)       | 1 (1 to 2)       | 18% (10.8% to 26%)        |
| Iraq    | Unintentional firearm injuries                  | 5 (3 to 7)       | 4 (3 to 6)       | -6.5% (-16% to 4.4%)      |
| Iraq    | Venomous animal contact                         | 2 (1 to 4)       | 2 (1 to 4)       | 8.2% (-0.9% to 19.9%)     |
| Ireland | Adverse effects of medical treatment            | 0 (0 to 0)       | 0 (0 to 0)       | 0% (0% to 0%)             |
| Ireland | Conflict and terrorism                          | 0 (0 to 0)       | 0 (0 to 0)       | NA                        |
| Ireland | Cyclist road injuries                           | 29 (21 to 38)    | 17 (12 to 23)    | -39.9% (-49.5% to -29.6%) |
| Ireland | Drowning                                        | 0 (0 to 0)       | 0 (0 to 0)       | 49.7% (34.2% to 66.5%)    |
| Ireland | Environmental heat and cold exposure            | 2 (2 to 3)       | 2 (1 to 3)       | -7.8% (-13.2% to -2.7%)   |
| Ireland | Executions and police conflict                  | 0 (0 to 0)       | 0 (0 to 0)       | NA                        |
| Ireland | Exposure to forces of nature                    | 0 (0 to 0)       | 0 (0 to 0)       | NA                        |
| Ireland | Falls                                           | 215 (166 to 278) | 249 (191 to 323) | 15.5% (10.6% to 20.7%)    |
| Ireland | Fire, heat, and hot substances                  | 3 (2 to 5)       | 2 (1 to 4)       | -23.1% (-29.8% to -16.4%) |
| Ireland | Foreign body in eyes                            | 0 (0 to 0)       | 0 (0 to 0)       | 0% (-0.3% to 0.4%)        |
| Ireland | Foreign body in other body part                 | 2 (1 to 3)       | 2 (1 to 3)       | 2.2% (-2.5% to 7.6%)      |
| Ireland | Motor vehicle road injuries                     | 35 (27 to 44)    | 18 (13 to 24)    | -49.4% (-57.7% to -39.7%) |
| Ireland | Motorcyclist road injuries                      | 9 (7 to 12)      | 6 (4 to 8)       | -37.8% (-50.8% to -22%)   |
| Ireland | Non-venomous animal contact                     | 3 (1 to 5)       | 2 (1 to 3)       | -25% (-29.1% to -21.6%)   |
| Ireland | Other exposure to mechanical forces             | 55 (34 to 88)    | 44 (27 to 71)    | -19.8% (-27.8% to -12.7%) |
| Ireland | Other road injuries                             | 1 (1 to 2)       | 1 (1 to 2)       | -13.2% (-27.2% to 3.2%)   |
| Ireland | Other transport injuries                        | 5 (4 to 7)       | 5 (3 to 7)       | -9.8% (-15.9% to -2.1%)   |
| Ireland | Other unintentional injuries                    | 27 (17 to 45)    | 24 (15 to 39)    | -12.9% (-20.1% to -6.2%)  |
| Ireland | Pedestrian road injuries                        | 11 (8 to 14)     | 6 (4 to 8)       | -45.8% (-56.1% to -34.2%) |
| Ireland | Physical violence by firearm                    | 0 (0 to 1)       | 1 (0 to 1)       | 47.6% (34.8% to 63.3%)    |
| Ireland | Physical violence by other means                | 13 (9 to 19)     | 13 (9 to 19)     | -0.2% (-6.6% to 6.5%)     |
| Ireland | Physical violence by sharp object               | 1 (1 to 2)       | 1 (1 to 2)       | -10% (-19.7% to -0.3%)    |
| Ireland | Poisoning by carbon monoxide                    | 0 (0 to 0)       | 0 (0 to 0)       | 15.2% (5.7% to 25%)       |
| Ireland | Poisoning by other means                        | 0 (0 to 0)       | 0 (0 to 0)       | -5.7% (-11.2% to 0.2%)    |
| Ireland | Pulmonary aspiration and foreign body in airway | 1 (1 to 2)       | 1 (0 to 1)       | -14% (-23% to -4.3%)      |
| Ireland | Self-harm by firearm                            | 0 (0 to 1)       | 0 (0 to 0)       | -16.2% (-31.1% to -1.2%)  |
| Ireland | Self-harm by other specified means              | 3 (2 to 5)       | 3 (2 to 5)       | -7% (-13.1% to -0.9%)     |
| Ireland | Unintentional firearm injuries                  | 1 (1 to 2)       | 1 (1 to 2)       | 0.4% (-11.1% to 11.5%)    |
| Ireland | Venomous animal contact                         | 1 (0 to 2)       | 1 (0 to 2)       | -22.8% (-27.5% to -18.3%) |
| Israel  | Adverse effects of medical treatment            | 0 (0 to 0)       | 0 (0 to 0)       | 0% (0% to 0%)             |
| Israel  | Conflict and terrorism                          | 12 (5 to 28)     | 0 (0 to 1)       | NA                        |
| Israel  | Cyclist road injuries                           | 22 (15 to 29)    | 19 (13 to 25)    | -13.5% (-22.4% to -3.3%)  |
| Israel  | Drowning                                        | 0 (0 to 0)       | 0 (0 to 0)       | 48.6% (31.3% to 67.1%)    |
| Israel  | Environmental heat and cold exposure            | 2 (2 to 3)       | 2 (2 to 3)       | -4.5% (-9.9% to 0.6%)     |
| Israel  | Executions and police conflict                  | 0 (0 to 0)       | 0 (0 to 0)       | NA                        |
| Israel  | Exposure to forces of nature                    | 0 (0 to 0)       | 0 (0 to 0)       | NA                        |
| Israel  | Falls                                           | 163 (124 to 213) | 195 (146 to 260) | 20.1% (15.2% to 24.5%)    |
| Israel  | Fire, heat, and hot substances                  | 2 (1 to 4)       | 2 (1 to 3)       | -9.9% (-14.9% to -5.2%)   |
| Israel  | Foreign body in eyes                            | 0 (0 to 0)       | 0 (0 to 0)       | 0.3% (0.1% to 0.7%)       |

|        |                                                 |                  |                  |                           |
|--------|-------------------------------------------------|------------------|------------------|---------------------------|
| Israel | Foreign body in other body part                 | 2 (1 to 4)       | 2 (1 to 3)       | -8.2% (-13.1% to -3.2%)   |
| Israel | Motor vehicle road injuries                     | 39 (30 to 49)    | 23 (17 to 29)    | -41.8% (-48.3% to -34.6%) |
| Israel | Motorcyclist road injuries                      | 7 (5 to 9)       | 8 (6 to 11)      | 21.7% (4.8% to 41.3%)     |
| Israel | Non-venomous animal contact                     | 2 (1 to 4)       | 2 (1 to 4)       | -15.4% (-19.3% to -11.2%) |
| Israel | Other exposure to mechanical forces             | 55 (34 to 86)    | 44 (26 to 70)    | -19% (-26.2% to -12%)     |
| Israel | Other road injuries                             | 1 (1 to 2)       | 1 (1 to 2)       | -15.8% (-25.8% to -5.5%)  |
| Israel | Other transport injuries                        | 4 (3 to 6)       | 4 (3 to 6)       | -4.1% (-7.8% to -0.1%)    |
| Israel | Other unintentional injuries                    | 29 (18 to 46)    | 23 (14 to 36)    | -21.1% (-26.4% to -15.1%) |
| Israel | Pedestrian road injuries                        | 12 (9 to 15)     | 8 (6 to 10)      | -34.8% (-42.2% to -27.4%) |
| Israel | Physical violence by firearm                    | 1 (0 to 1)       | 1 (1 to 2)       | 97.3% (72.2% to 127.6%)   |
| Israel | Physical violence by other means                | 22 (16 to 32)    | 21 (15 to 30)    | -6.2% (-14.9% to 2.4%)    |
| Israel | Physical violence by sharp object               | 3 (2 to 4)       | 3 (2 to 5)       | 16.4% (1.1% to 33.1%)     |
| Israel | Poisoning by carbon monoxide                    | 0 (0 to 0)       | 0 (0 to 0)       | 6% (-3.2% to 15.6%)       |
| Israel | Poisoning by other means                        | 0 (0 to 0)       | 0 (0 to 0)       | -8.4% (-14.9% to -1.9%)   |
| Israel | Pulmonary aspiration and foreign body in airway | 1 (1 to 2)       | 1 (1 to 2)       | -27.1% (-33.4% to -19.4%) |
| Israel | Self-harm by firearm                            | 0 (0 to 1)       | 0 (0 to 0)       | -30.9% (-41% to -20.3%)   |
| Israel | Self-harm by other specified means              | 2 (1 to 3)       | 2 (1 to 2)       | -17.8% (-22.9% to -12.8%) |
| Israel | Unintentional firearm injuries                  | 2 (1 to 3)       | 1 (1 to 2)       | -37.4% (-46.9% to -28.2%) |
| Israel | Venomous animal contact                         | 1 (0 to 2)       | 1 (0 to 2)       | -15.2% (-20.6% to -9.7%)  |
| Italy  | Adverse effects of medical treatment            | 0 (0 to 0)       | 0 (0 to 0)       | 0% (0% to 0%)             |
| Italy  | Conflict and terrorism                          | 0 (0 to 0)       | 0 (0 to 0)       | NA                        |
| Italy  | Cyclist road injuries                           | 25 (17 to 36)    | 18 (13 to 24)    | -28.8% (-33.9% to -23.4%) |
| Italy  | Drowning                                        | 0 (0 to 0)       | 0 (0 to 0)       | 2.3% (-1.8% to 5.5%)      |
| Italy  | Environmental heat and cold exposure            | 4 (2 to 6)       | 2 (2 to 4)       | -37.3% (-43.1% to -31%)   |
| Italy  | Executions and police conflict                  | 0 (0 to 0)       | 0 (0 to 0)       | NA                        |
| Italy  | Exposure to forces of nature                    | 0 (0 to 0)       | 0 (0 to 0)       | NA                        |
| Italy  | Falls                                           | 276 (215 to 355) | 231 (179 to 299) | -16.3% (-20.8% to -11.9%) |
| Italy  | Fire, heat, and hot substances                  | 2 (1 to 3)       | 1 (1 to 2)       | -39.3% (-45.5% to -30.7%) |
| Italy  | Foreign body in eyes                            | 0 (0 to 0)       | 0 (0 to 0)       | 0.6% (0.2% to 1.2%)       |
| Italy  | Foreign body in other body part                 | 2 (1 to 5)       | 2 (1 to 5)       | -5.9% (-16.8% to 6.9%)    |
| Italy  | Motor vehicle road injuries                     | 37 (26 to 50)    | 27 (19 to 36)    | -27.2% (-31.6% to -22.4%) |
| Italy  | Motorcyclist road injuries                      | 17 (12 to 24)    | 17 (12 to 23)    | 0.5% (-7.5% to 9.7%)      |
| Italy  | Non-venomous animal contact                     | 2 (1 to 4)       | 1 (0 to 1)       | -64.7% (-70.5% to -56%)   |
| Italy  | Other exposure to mechanical forces             | 50 (30 to 82)    | 31 (19 to 49)    | -38% (-41.5% to -34%)     |
| Italy  | Other road injuries                             | 3 (2 to 5)       | 3 (2 to 5)       | 9.4% (1.5% to 19%)        |
| Italy  | Other transport injuries                        | 5 (4 to 7)       | 5 (4 to 7)       | 4.9% (2.7% to 7.6%)       |
| Italy  | Other unintentional injuries                    | 29 (17 to 48)    | 16 (10 to 25)    | -45.9% (-49.4% to -41.5%) |
| Italy  | Pedestrian road injuries                        | 10 (7 to 14)     | 7 (5 to 9)       | -29.5% (-34.1% to -24.1%) |
| Italy  | Physical violence by firearm                    | 2 (1 to 2)       | 1 (1 to 2)       | -37% (-44.4% to -27.6%)   |
| Italy  | Physical violence by other means                | 18 (11 to 26)    | 10 (6 to 14)     | -45.4% (-48.4% to -41.5%) |
| Italy  | Physical violence by sharp object               | 2 (1 to 4)       | 1 (1 to 2)       | -43.5% (-49.5% to -35.8%) |
| Italy  | Poisoning by carbon monoxide                    | 0 (0 to 0)       | 0 (0 to 0)       | -29.2% (-41.2% to -8.3%)  |
| Italy  | Poisoning by other means                        | 0 (0 to 1)       | 0 (0 to 0)       | -47% (-51.5% to -41.3%)   |

|         |                                                 |                 |                 |                           |
|---------|-------------------------------------------------|-----------------|-----------------|---------------------------|
| Italy   | Pulmonary aspiration and foreign body in airway | 1 (1 to 2)      | 1 (1 to 2)      | -6.9% (-13.3% to -0.5%)   |
| Italy   | Self-harm by firearm                            | 0 (0 to 1)      | 0 (0 to 1)      | -4.8% (-13% to 6%)        |
| Italy   | Self-harm by other specified means              | 2 (1 to 3)      | 1 (1 to 2)      | -37.7% (-41.6% to -34.2%) |
| Italy   | Unintentional firearm injuries                  | 2 (1 to 3)      | 1 (0 to 2)      | -44.7% (-50.8% to -36.8%) |
| Italy   | Venomous animal contact                         | 2 (1 to 5)      | 1 (0 to 1)      | -70.5% (-75.4% to -64%)   |
| Jamaica | Adverse effects of medical treatment            | 0 (0 to 0)      | 0 (0 to 0)      | 0% (0% to 0%)             |
| Jamaica | Conflict and terrorism                          | 6 (2 to 14)     | 0 (0 to 0)      | NA                        |
| Jamaica | Cyclist road injuries                           | 23 (17 to 31)   | 21 (16 to 29)   | -6.6% (-14.6% to 1.4%)    |
| Jamaica | Drowning                                        | 0 (0 to 0)      | 0 (0 to 1)      | 49.8% (30% to 71.5%)      |
| Jamaica | Environmental heat and cold exposure            | 10 (7 to 15)    | 11 (8 to 16)    | 6.3% (1.9% to 10.7%)      |
| Jamaica | Executions and police conflict                  | 0 (0 to 0)      | 0 (0 to 0)      | NA                        |
| Jamaica | Exposure to forces of nature                    | 0 (0 to 0)      | 0 (0 to 0)      | NA                        |
| Jamaica | Falls                                           | 41 (31 to 55)   | 59 (46 to 78)   | 42.7% (37.4% to 49%)      |
| Jamaica | Fire, heat, and hot substances                  | 4 (2 to 6)      | 4 (2 to 6)      | -0.3% (-5.7% to 7.1%)     |
| Jamaica | Foreign body in eyes                            | 0 (0 to 0)      | 0 (0 to 0)      | 0.6% (0.3% to 1.1%)       |
| Jamaica | Foreign body in other body part                 | 2 (1 to 5)      | 1 (1 to 3)      | -42.4% (-50.1% to -35.2%) |
| Jamaica | Motor vehicle road injuries                     | 14 (10 to 18)   | 16 (12 to 21)   | 20.4% (9.4% to 33.1%)     |
| Jamaica | Motorcyclist road injuries                      | 9 (7 to 12)     | 9 (7 to 12)     | -1.1% (-11% to 8.4%)      |
| Jamaica | Non-venomous animal contact                     | 4 (2 to 7)      | 3 (2 to 5)      | -20.8% (-25.1% to -16.2%) |
| Jamaica | Other exposure to mechanical forces             | 50 (28 to 84)   | 49 (28 to 83)   | -0.8% (-8.1% to 7.6%)     |
| Jamaica | Other road injuries                             | 3 (2 to 6)      | 3 (2 to 5)      | -9% (-18% to 0.7%)        |
| Jamaica | Other transport injuries                        | 5 (4 to 7)      | 4 (3 to 6)      | -14.2% (-19.4% to -7.9%)  |
| Jamaica | Other unintentional injuries                    | 16 (10 to 27)   | 15 (9 to 25)    | -7.7% (-13.4% to -1.9%)   |
| Jamaica | Pedestrian road injuries                        | 9 (7 to 12)     | 10 (7 to 13)    | 7.7% (-1.3% to 16.8%)     |
| Jamaica | Physical violence by firearm                    | 2 (1 to 3)      | 3 (2 to 4)      | 27.5% (11.6% to 45.7%)    |
| Jamaica | Physical violence by other means                | 14 (10 to 21)   | 15 (10 to 22)   | 5.9% (-3.6% to 17.3%)     |
| Jamaica | Physical violence by sharp object               | 6 (4 to 10)     | 5 (3 to 8)      | -14.9% (-23.5% to -5.2%)  |
| Jamaica | Poisoning by carbon monoxide                    | 0 (0 to 0)      | 0 (0 to 0)      | 6.1% (-4.8% to 16.8%)     |
| Jamaica | Poisoning by other means                        | 0 (0 to 0)      | 0 (0 to 0)      | -1.2% (-7.8% to 5.7%)     |
| Jamaica | Pulmonary aspiration and foreign body in airway | 1 (0 to 1)      | 1 (0 to 1)      | 7% (-5.1% to 21.3%)       |
| Jamaica | Self-harm by firearm                            | 0 (0 to 0)      | 0 (0 to 0)      | 38.7% (23.8% to 60.1%)    |
| Jamaica | Self-harm by other specified means              | 0 (0 to 0)      | 0 (0 to 0)      | 8.2% (-0.1% to 16.1%)     |
| Jamaica | Unintentional firearm injuries                  | 14 (9 to 21)    | 11 (7 to 16)    | -23.6% (-32.4% to -14%)   |
| Jamaica | Venomous animal contact                         | 6 (3 to 12)     | 5 (3 to 10)     | -18.5% (-22% to -14.2%)   |
| Japan   | Adverse effects of medical treatment            | 0 (0 to 0)      | 0 (0 to 0)      | 0% (0% to 0%)             |
| Japan   | Conflict and terrorism                          | 0 (0 to 0)      | 0 (0 to 0)      | NA                        |
| Japan   | Cyclist road injuries                           | 20 (13 to 28)   | 12 (8 to 18)    | -39.5% (-43.4% to -35.7%) |
| Japan   | Drowning                                        | 0 (0 to 1)      | 1 (0 to 1)      | 26.9% (22.8% to 31.7%)    |
| Japan   | Environmental heat and cold exposure            | 2 (1 to 3)      | 2 (1 to 3)      | 6.4% (4.2% to 9.2%)       |
| Japan   | Executions and police conflict                  | 0 (0 to 0)      | 0 (0 to 0)      | NA                        |
| Japan   | Exposure to forces of nature                    | 0 (0 to 0)      | 0 (0 to 0)      | NA                        |
| Japan   | Falls                                           | 112 (81 to 154) | 110 (79 to 153) | -1.9% (-4.4% to 0.5%)     |
| Japan   | Fire, heat, and hot substances                  | 2 (1 to 2)      | 1 (1 to 2)      | -10.4% (-14.6% to -6.9%)  |

|        |                                                 |                |                |                           |
|--------|-------------------------------------------------|----------------|----------------|---------------------------|
| Japan  | Foreign body in eyes                            | 0 (0 to 0)     | 0 (0 to 0)     | -2.8% (-4.2% to -1.1%)    |
| Japan  | Foreign body in other body part                 | 3 (1 to 7)     | 3 (1 to 7)     | -3.4% (-4.7% to -1.9%)    |
| Japan  | Motor vehicle road injuries                     | 30 (20 to 41)  | 15 (10 to 22)  | -47.5% (-50.5% to -44.6%) |
| Japan  | Motorcyclist road injuries                      | 20 (14 to 27)  | 11 (7 to 15)   | -46.2% (-49.5% to -42.9%) |
| Japan  | Non-venomous animal contact                     | 5 (3 to 10)    | 5 (2 to 8)     | -15.2% (-16.6% to -13.9%) |
| Japan  | Other exposure to mechanical forces             | 91 (48 to 162) | 82 (43 to 148) | -9.2% (-13.2% to -6.4%)   |
| Japan  | Other road injuries                             | 2 (1 to 3)     | 1 (1 to 2)     | -21.9% (-26% to -17.1%)   |
| Japan  | Other transport injuries                        | 5 (4 to 7)     | 5 (3 to 6)     | -8.3% (-11.5% to -5.3%)   |
| Japan  | Other unintentional injuries                    | 23 (14 to 40)  | 20 (12 to 35)  | -13.2% (-15.8% to -10.5%) |
| Japan  | Pedestrian road injuries                        | 11 (8 to 14)   | 6 (4 to 9)     | -39.7% (-45.1% to -34.1%) |
| Japan  | Physical violence by firearm                    | 0 (0 to 1)     | 1 (0 to 1)     | 44.7% (37.8% to 52.8%)    |
| Japan  | Physical violence by other means                | 12 (8 to 17)   | 12 (8 to 18)   | 2.2% (-1.9% to 6.3%)      |
| Japan  | Physical violence by sharp object               | 1 (1 to 2)     | 1 (1 to 2)     | 3.7% (-1.8% to 8.9%)      |
| Japan  | Poisoning by carbon monoxide                    | 0 (0 to 0)     | 0 (0 to 0)     | 7.1% (4% to 10.3%)        |
| Japan  | Poisoning by other means                        | 0 (0 to 0)     | 0 (0 to 0)     | -7.4% (-9.7% to -5.1%)    |
| Japan  | Pulmonary aspiration and foreign body in airway | 0 (0 to 1)     | 0 (0 to 1)     | -15.1% (-17.5% to -12.4%) |
| Japan  | Self-harm by firearm                            | 0 (0 to 0)     | 0 (0 to 0)     | 36.5% (26% to 45.8%)      |
| Japan  | Self-harm by other specified means              | 2 (1 to 4)     | 2 (2 to 4)     | 6.5% (2.7% to 10.7%)      |
| Japan  | Unintentional firearm injuries                  | 1 (0 to 2)     | 1 (0 to 2)     | -1% (-5.3% to 3%)         |
| Japan  | Venomous animal contact                         | 2 (1 to 4)     | 1 (0 to 3)     | -15.3% (-17.4% to -12.9%) |
| Jordan | Adverse effects of medical treatment            | 0 (0 to 0)     | 0 (0 to 0)     | 0% (0% to 0%)             |
| Jordan | Conflict and terrorism                          | 0 (0 to 0)     | 0 (0 to 0)     | NA                        |
| Jordan | Cyclist road injuries                           | 15 (10 to 21)  | 14 (10 to 19)  | -7.3% (-15.6% to 3.1%)    |
| Jordan | Drowning                                        | 0 (0 to 0)     | 0 (0 to 1)     | 99.6% (70.2% to 130.9%)   |
| Jordan | Environmental heat and cold exposure            | 3 (2 to 4)     | 3 (2 to 4)     | 0.4% (-5.4% to 5.7%)      |
| Jordan | Executions and police conflict                  | 0 (0 to 0)     | 0 (0 to 0)     | NA                        |
| Jordan | Exposure to forces of nature                    | 0 (0 to 0)     | 0 (0 to 0)     | NA                        |
| Jordan | Falls                                           | 70 (54 to 91)  | 85 (65 to 114) | 22.6% (16.2% to 29.7%)    |
| Jordan | Fire, heat, and hot substances                  | 1 (1 to 2)     | 1 (0 to 1)     | -34.7% (-41.5% to -28.1%) |
| Jordan | Foreign body in eyes                            | 0 (0 to 0)     | 0 (0 to 0)     | 1% (0.4% to 1.9%)         |
| Jordan | Foreign body in other body part                 | 1 (1 to 3)     | 1 (1 to 3)     | 1.7% (-4% to 7.4%)        |
| Jordan | Motor vehicle road injuries                     | 35 (28 to 45)  | 24 (19 to 31)  | -31.6% (-37% to -25.4%)   |
| Jordan | Motorcyclist road injuries                      | 8 (6 to 11)    | 6 (4 to 7)     | -29% (-36.5% to -20.4%)   |
| Jordan | Non-venomous animal contact                     | 3 (2 to 6)     | 3 (2 to 6)     | 3% (-1.3% to 8.7%)        |
| Jordan | Other exposure to mechanical forces             | 22 (13 to 35)  | 21 (12 to 34)  | -3.5% (-12.7% to 4.7%)    |
| Jordan | Other road injuries                             | 2 (1 to 3)     | 2 (1 to 3)     | -8% (-17.8% to 3%)        |
| Jordan | Other transport injuries                        | 8 (6 to 11)    | 7 (5 to 9)     | -21% (-26.7% to -15.1%)   |
| Jordan | Other unintentional injuries                    | 19 (12 to 30)  | 16 (10 to 26)  | -16.8% (-24% to -8.7%)    |
| Jordan | Pedestrian road injuries                        | 25 (20 to 31)  | 16 (12 to 21)  | -36.3% (-41.5% to -30.2%) |
| Jordan | Physical violence by firearm                    | 0 (0 to 1)     | 1 (1 to 1)     | 133.4% (105.7% to 166.4%) |
| Jordan | Physical violence by other means                | 17 (12 to 23)  | 16 (11 to 22)  | -4.7% (-11.3% to 2.2%)    |
| Jordan | Physical violence by sharp object               | 2 (1 to 4)     | 2 (1 to 3)     | -4.7% (-14.4% to 5.1%)    |
| Jordan | Poisoning by carbon monoxide                    | 0 (0 to 0)     | 0 (0 to 0)     | 4% (-9.4% to 18.3%)       |



|            |                                                 |                  |                  |                           |
|------------|-------------------------------------------------|------------------|------------------|---------------------------|
| Jordan     | Poisoning by other means                        | 0 (0 to 0)       | 0 (0 to 0)       | -27.1% (-36.1% to -17.9%) |
| Jordan     | Pulmonary aspiration and foreign body in airway | 0 (0 to 1)       | 0 (0 to 1)       | -18% (-25.8% to -10.6%)   |
| Jordan     | Self-harm by firearm                            | 0 (0 to 0)       | 0 (0 to 0)       | 16.1% (3.4% to 32.1%)     |
| Jordan     | Self-harm by other specified means              | 1 (1 to 1)       | 1 (0 to 1)       | -18.7% (-25.4% to -11.6%) |
| Jordan     | Unintentional firearm injuries                  | 2 (1 to 3)       | 2 (1 to 3)       | 9.8% (-2.9% to 22.6%)     |
| Jordan     | Venomous animal contact                         | 2 (1 to 4)       | 2 (1 to 4)       | 2% (-3.8% to 7.6%)        |
| Kazakhstan | Adverse effects of medical treatment            | 0 (0 to 0)       | 0 (0 to 0)       | 0% (0% to 0%)             |
| Kazakhstan | Conflict and terrorism                          | 0 (0 to 0)       | 0 (0 to 0)       | NA                        |
| Kazakhstan | Cyclist road injuries                           | 25 (17 to 35)    | 25 (16 to 34)    | -2.1% (-12.6% to 9.8%)    |
| Kazakhstan | Drowning                                        | 1 (0 to 1)       | 1 (0 to 1)       | 1.6% (-9.3% to 13.9%)     |
| Kazakhstan | Environmental heat and cold exposure            | 4 (3 to 6)       | 6 (5 to 9)       | 63.4% (42.2% to 88.6%)    |
| Kazakhstan | Executions and police conflict                  | 0 (0 to 0)       | 0 (0 to 0)       | NA                        |
| Kazakhstan | Exposure to forces of nature                    | 0 (0 to 0)       | 0 (0 to 0)       | NA                        |
| Kazakhstan | Falls                                           | 162 (124 to 214) | 173 (133 to 225) | 7.3% (2.3% to 12.4%)      |
| Kazakhstan | Fire, heat, and hot substances                  | 5 (3 to 8)       | 3 (2 to 6)       | -24.7% (-32.4% to -17%)   |
| Kazakhstan | Foreign body in eyes                            | 0 (0 to 0)       | 0 (0 to 0)       | 0.6% (0.3% to 1.3%)       |
| Kazakhstan | Foreign body in other body part                 | 2 (1 to 4)       | 2 (1 to 4)       | -0.2% (-5.7% to 5.2%)     |
| Kazakhstan | Motor vehicle road injuries                     | 88 (70 to 111)   | 89 (69 to 110)   | 0.4% (-10.1% to 10.6%)    |
| Kazakhstan | Motorcyclist road injuries                      | 6 (4 to 8)       | 5 (4 to 7)       | -11.2% (-23.1% to 2.2%)   |
| Kazakhstan | Non-venomous animal contact                     | 3 (1 to 5)       | 2 (1 to 4)       | -16.1% (-21.2% to -10.8%) |
| Kazakhstan | Other exposure to mechanical forces             | 78 (50 to 120)   | 67 (42 to 104)   | -14.4% (-21% to -7.9%)    |
| Kazakhstan | Other road injuries                             | 2 (1 to 4)       | 2 (1 to 4)       | -1% (-12.5% to 11.2%)     |
| Kazakhstan | Other transport injuries                        | 5 (4 to 7)       | 5 (3 to 6)       | -11.2% (-18% to -3.2%)    |
| Kazakhstan | Other unintentional injuries                    | 21 (13 to 33)    | 20 (13 to 33)    | -1.5% (-7.1% to 3.1%)     |
| Kazakhstan | Pedestrian road injuries                        | 35 (27 to 45)    | 26 (20 to 33)    | -25.3% (-34.3% to -15.4%) |
| Kazakhstan | Physical violence by firearm                    | 0 (0 to 0)       | 0 (0 to 0)       | 16.7% (-3.1% to 38%)      |
| Kazakhstan | Physical violence by other means                | 32 (23 to 44)    | 21 (15 to 29)    | -33.6% (-41.3% to -25.4%) |
| Kazakhstan | Physical violence by sharp object               | 5 (3 to 8)       | 3 (2 to 5)       | -36.5% (-47.1% to -24.8%) |
| Kazakhstan | Poisoning by carbon monoxide                    | 0 (0 to 0)       | 0 (0 to 0)       | 22.8% (6.3% to 40.2%)     |
| Kazakhstan | Poisoning by other means                        | 1 (0 to 1)       | 0 (0 to 1)       | -34.4% (-42.2% to -26.2%) |
| Kazakhstan | Pulmonary aspiration and foreign body in airway | 1 (1 to 3)       | 1 (1 to 2)       | -29% (-36.5% to -21.6%)   |
| Kazakhstan | Self-harm by firearm                            | 1 (0 to 1)       | 1 (0 to 1)       | -0.9% (-19.5% to 17.3%)   |
| Kazakhstan | Self-harm by other specified means              | 5 (3 to 7)       | 5 (4 to 8)       | 15.7% (9.2% to 22.6%)     |
| Kazakhstan | Unintentional firearm injuries                  | 1 (1 to 2)       | 1 (0 to 1)       | -23.2% (-35.6% to -10.5%) |
| Kazakhstan | Venomous animal contact                         | 2 (1 to 5)       | 2 (1 to 4)       | -14.9% (-19.8% to -9.5%)  |
| Kenya      | Adverse effects of medical treatment            | 0 (0 to 0)       | 0 (0 to 0)       | 0% (0% to 0%)             |
| Kenya      | Conflict and terrorism                          | 0 (0 to 0)       | 1 (0 to 2)       | NA                        |
| Kenya      | Cyclist road injuries                           | 33 (24 to 46)    | 36 (26 to 50)    | 7.7% (5.5% to 10%)        |
| Kenya      | Drowning                                        | 0 (0 to 0)       | 0 (0 to 0)       | -19.5% (-23.1% to -15.8%) |
| Kenya      | Environmental heat and cold exposure            | 3 (2 to 4)       | 3 (2 to 4)       | 0.7% (-1.7% to 2.7%)      |
| Kenya      | Executions and police conflict                  | 0 (0 to 0)       | 0 (0 to 0)       | NA                        |
| Kenya      | Exposure to forces of nature                    | 1 (1 to 2)       | 0 (0 to 0)       | NA                        |
| Kenya      | Falls                                           | 51 (40 to 65)    | 54 (42 to 70)    | 7.1% (6% to 8.3%)         |

|          |                                                 |               |               |                           |
|----------|-------------------------------------------------|---------------|---------------|---------------------------|
| Kenya    | Fire, heat, and hot substances                  | 2 (1 to 3)    | 2 (1 to 3)    | -8.5% (-10.2% to -6.9%)   |
| Kenya    | Foreign body in eyes                            | 0 (0 to 0)    | 0 (0 to 0)    | -0.4% (-1.2% to 0%)       |
| Kenya    | Foreign body in other body part                 | 4 (2 to 7)    | 4 (2 to 7)    | -0.5% (-2.2% to 1.4%)     |
| Kenya    | Motor vehicle road injuries                     | 30 (21 to 40) | 31 (23 to 42) | 5.9% (4.1% to 7.7%)       |
| Kenya    | Motorcyclist road injuries                      | 9 (6 to 12)   | 10 (7 to 13)  | 9% (6.6% to 11.2%)        |
| Kenya    | Non-venomous animal contact                     | 9 (5 to 15)   | 8 (5 to 14)   | -6.2% (-7.6% to -4.5%)    |
| Kenya    | Other exposure to mechanical forces             | 21 (12 to 34) | 20 (12 to 33) | -3.6% (-6.2% to -0.7%)    |
| Kenya    | Other road injuries                             | 1 (1 to 2)    | 1 (1 to 2)    | -0.5% (-3% to 2.1%)       |
| Kenya    | Other transport injuries                        | 6 (4 to 8)    | 6 (4 to 8)    | -3.2% (-4.7% to -1.8%)    |
| Kenya    | Other unintentional injuries                    | 9 (6 to 14)   | 8 (5 to 14)   | -7.2% (-12.2% to -2.5%)   |
| Kenya    | Pedestrian road injuries                        | 55 (42 to 69) | 53 (40 to 66) | -3.6% (-5.1% to -2%)      |
| Kenya    | Physical violence by firearm                    | 0 (0 to 0)    | 0 (0 to 1)    | 10.5% (8.3% to 12.8%)     |
| Kenya    | Physical violence by other means                | 11 (8 to 16)  | 12 (8 to 17)  | 6.9% (5.2% to 8.3%)       |
| Kenya    | Physical violence by sharp object               | 3 (2 to 5)    | 3 (2 to 5)    | 7% (5% to 9%)             |
| Kenya    | Poisoning by carbon monoxide                    | 0 (0 to 0)    | 0 (0 to 0)    | 8.8% (5.3% to 13.1%)      |
| Kenya    | Poisoning by other means                        | 0 (0 to 0)    | 0 (0 to 0)    | -8.6% (-11.1% to -6.5%)   |
| Kenya    | Pulmonary aspiration and foreign body in airway | 0 (0 to 1)    | 0 (0 to 1)    | -11.1% (-13.2% to -9%)    |
| Kenya    | Self-harm by firearm                            | 0 (0 to 0)    | 0 (0 to 0)    | 24.2% (17.7% to 32.1%)    |
| Kenya    | Self-harm by other specified means              | 1 (1 to 2)    | 1 (1 to 2)    | -0.5% (-2.9% to 2%)       |
| Kenya    | Unintentional firearm injuries                  | 2 (1 to 3)    | 2 (1 to 3)    | -13.4% (-18.7% to -8%)    |
| Kenya    | Venomous animal contact                         | 4 (1 to 8)    | 3 (1 to 7)    | -11.4% (-15.4% to -8.4%)  |
| Kiribati | Adverse effects of medical treatment            | 0 (0 to 0)    | 0 (0 to 0)    | 0% (0% to 0%)             |
| Kiribati | Conflict and terrorism                          | 0 (0 to 0)    | 0 (0 to 0)    | NA                        |
| Kiribati | Cyclist road injuries                           | 10 (7 to 14)  | 10 (6 to 14)  | -2.1% (-10.9% to 6.7%)    |
| Kiribati | Drowning                                        | 0 (0 to 1)    | 0 (0 to 1)    | -15% (-21.9% to -7.4%)    |
| Kiribati | Environmental heat and cold exposure            | 2 (1 to 3)    | 2 (2 to 4)    | 12.3% (6% to 19.2%)       |
| Kiribati | Executions and police conflict                  | 0 (0 to 0)    | 0 (0 to 0)    | NA                        |
| Kiribati | Exposure to forces of nature                    | 0 (0 to 0)    | 0 (0 to 0)    | NA                        |
| Kiribati | Falls                                           | 30 (23 to 40) | 42 (32 to 56) | 38% (32.6% to 44.1%)      |
| Kiribati | Fire, heat, and hot substances                  | 1 (1 to 2)    | 1 (1 to 2)    | 5.3% (-0.6% to 13.3%)     |
| Kiribati | Foreign body in eyes                            | 0 (0 to 0)    | 0 (0 to 0)    | -0.8% (-1.3% to -0.4%)    |
| Kiribati | Foreign body in other body part                 | 1 (0 to 1)    | 1 (0 to 1)    | -1% (-5% to 4.2%)         |
| Kiribati | Motor vehicle road injuries                     | 19 (15 to 25) | 16 (12 to 22) | -15.4% (-23.4% to -6.9%)  |
| Kiribati | Motorcyclist road injuries                      | 14 (11 to 19) | 22 (17 to 29) | 57.3% (40% to 76.7%)      |
| Kiribati | Non-venomous animal contact                     | 5 (3 to 9)    | 5 (3 to 8)    | -1.8% (-6.5% to 2.4%)     |
| Kiribati | Other exposure to mechanical forces             | 10 (6 to 17)  | 9 (5 to 16)   | -8.8% (-14.9% to -2.7%)   |
| Kiribati | Other road injuries                             | 1 (1 to 2)    | 1 (1 to 2)    | -4.5% (-15.4% to 7.9%)    |
| Kiribati | Other transport injuries                        | 6 (5 to 8)    | 6 (4 to 7)    | -12.9% (-19.9% to -6.6%)  |
| Kiribati | Other unintentional injuries                    | 5 (3 to 8)    | 4 (3 to 7)    | -6% (-11.4% to -0.1%)     |
| Kiribati | Pedestrian road injuries                        | 8 (6 to 11)   | 5 (4 to 7)    | -34.4% (-42.6% to -25%)   |
| Kiribati | Physical violence by firearm                    | 0 (0 to 0)    | 0 (0 to 0)    | -4.7% (-15.5% to 6.8%)    |
| Kiribati | Physical violence by other means                | 25 (18 to 35) | 19 (13 to 26) | -24.8% (-30.3% to -19.2%) |
| Kiribati | Physical violence by sharp object               | 2 (1 to 4)    | 2 (1 to 3)    | -21.9% (-29.9% to -12.9%) |

|            |                                                 |                  |                 |                           |
|------------|-------------------------------------------------|------------------|-----------------|---------------------------|
| Kiribati   | Poisoning by carbon monoxide                    | 0 (0 to 0)       | 0 (0 to 0)      | 21% (6.9% to 37.8%)       |
| Kiribati   | Poisoning by other means                        | 0 (0 to 0)       | 0 (0 to 0)      | -19.6% (-27% to -11.3%)   |
| Kiribati   | Pulmonary aspiration and foreign body in airway | 0 (0 to 0)       | 0 (0 to 0)      | -1.7% (-12.7% to 8.9%)    |
| Kiribati   | Self-harm by firearm                            | 1 (0 to 1)       | 1 (0 to 1)      | -5% (-23.5% to 17.5%)     |
| Kiribati   | Self-harm by other specified means              | 4 (3 to 6)       | 3 (2 to 5)      | -15.1% (-21.5% to -8%)    |
| Kiribati   | Unintentional firearm injuries                  | 1 (1 to 2)       | 1 (1 to 2)      | 5.7% (-2.9% to 14.2%)     |
| Kiribati   | Venomous animal contact                         | 3 (1 to 6)       | 3 (1 to 6)      | 2.5% (-3.2% to 9%)        |
| Kuwait     | Adverse effects of medical treatment            | 0 (0 to 0)       | 0 (0 to 0)      | 0% (0% to 0%)             |
| Kuwait     | Conflict and terrorism                          | 366 (149 to 827) | 0 (0 to 0)      | NA                        |
| Kuwait     | Cyclist road injuries                           | 23 (16 to 31)    | 18 (12 to 24)   | -22.4% (-30.5% to -13.7%) |
| Kuwait     | Drowning                                        | 0 (0 to 0)       | 0 (0 to 1)      | 87.6% (61.2% to 127.6%)   |
| Kuwait     | Environmental heat and cold exposure            | 3 (2 to 4)       | 3 (2 to 4)      | 2.9% (-2.2% to 8.8%)      |
| Kuwait     | Executions and police conflict                  | 0 (0 to 0)       | 0 (0 to 0)      | NA                        |
| Kuwait     | Exposure to forces of nature                    | 0 (0 to 0)       | 0 (0 to 0)      | NA                        |
| Kuwait     | Falls                                           | 96 (73 to 128)   | 111 (83 to 147) | 14.9% (10% to 20%)        |
| Kuwait     | Fire, heat, and hot substances                  | 1 (0 to 1)       | 1 (0 to 1)      | 2.7% (-2.6% to 7.9%)      |
| Kuwait     | Foreign body in eyes                            | 0 (0 to 0)       | 0 (0 to 0)      | -2.4% (-4.6% to -0.9%)    |
| Kuwait     | Foreign body in other body part                 | 1 (1 to 3)       | 1 (1 to 3)      | -0.7% (-4.9% to 5.3%)     |
| Kuwait     | Motor vehicle road injuries                     | 57 (45 to 71)    | 40 (32 to 51)   | -28.8% (-36.3% to -21.2%) |
| Kuwait     | Motorcyclist road injuries                      | 10 (8 to 14)     | 9 (7 to 12)     | -13.9% (-24.9% to -2.1%)  |
| Kuwait     | Non-venomous animal contact                     | 2 (1 to 4)       | 2 (1 to 4)      | 1.4% (-3.1% to 6%)        |
| Kuwait     | Other exposure to mechanical forces             | 24 (15 to 39)    | 25 (15 to 42)   | 3.5% (-4.2% to 11.1%)     |
| Kuwait     | Other road injuries                             | 3 (1 to 4)       | 2 (1 to 4)      | -14.7% (-25.3% to -2%)    |
| Kuwait     | Other transport injuries                        | 8 (6 to 10)      | 6 (5 to 8)      | -19.5% (-26.1% to -13.1%) |
| Kuwait     | Other unintentional injuries                    | 18 (11 to 30)    | 19 (12 to 32)   | 4.8% (-2.4% to 11.5%)     |
| Kuwait     | Pedestrian road injuries                        | 34 (27 to 42)    | 21 (17 to 27)   | -36.9% (-43.9% to -30.3%) |
| Kuwait     | Physical violence by firearm                    | 0 (0 to 1)       | 1 (0 to 1)      | 59.4% (39.5% to 84.4%)    |
| Kuwait     | Physical violence by other means                | 16 (11 to 22)    | 13 (9 to 18)    | -19.2% (-25.7% to -11.8%) |
| Kuwait     | Physical violence by sharp object               | 2 (1 to 3)       | 2 (1 to 3)      | -27.1% (-35.8% to -18.9%) |
| Kuwait     | Poisoning by carbon monoxide                    | 0 (0 to 0)       | 0 (0 to 0)      | 11.3% (-0.2% to 25%)      |
| Kuwait     | Poisoning by other means                        | 0 (0 to 0)       | 0 (0 to 0)      | -11% (-18.3% to -0.8%)    |
| Kuwait     | Pulmonary aspiration and foreign body in airway | 0 (0 to 1)       | 0 (0 to 1)      | -13.5% (-22.6% to -4.9%)  |
| Kuwait     | Self-harm by firearm                            | 0 (0 to 0)       | 0 (0 to 0)      | 21.2% (9.1% to 34.7%)     |
| Kuwait     | Self-harm by other specified means              | 1 (0 to 1)       | 1 (1 to 1)      | 13.3% (6.5% to 20.2%)     |
| Kuwait     | Unintentional firearm injuries                  | 2 (1 to 3)       | 2 (1 to 3)      | 10.2% (-0.9% to 21.8%)    |
| Kuwait     | Venomous animal contact                         | 1 (1 to 3)       | 1 (1 to 3)      | 2.3% (-3.7% to 7.8%)      |
| Kyrgyzstan | Adverse effects of medical treatment            | 0 (0 to 0)       | 0 (0 to 0)      | 0% (0% to 0%)             |
| Kyrgyzstan | Conflict and terrorism                          | 0 (0 to 0)       | 0 (0 to 0)      | NA                        |
| Kyrgyzstan | Cyclist road injuries                           | 21 (14 to 30)    | 20 (14 to 28)   | -5.7% (-14.9% to 3.8%)    |
| Kyrgyzstan | Drowning                                        | 1 (0 to 1)       | 1 (0 to 1)      | -14.2% (-25.1% to -3.3%)  |
| Kyrgyzstan | Environmental heat and cold exposure            | 4 (3 to 6)       | 4 (3 to 6)      | 5.9% (-4.6% to 16.6%)     |
| Kyrgyzstan | Executions and police conflict                  | 0 (0 to 0)       | 0 (0 to 0)      | NA                        |
| Kyrgyzstan | Exposure to forces of nature                    | 0 (0 to 0)       | 0 (0 to 0)      | NA                        |

|                                  |                                                 |                  |                 |                           |
|----------------------------------|-------------------------------------------------|------------------|-----------------|---------------------------|
| Kyrgyzstan                       | Falls                                           | 162 (125 to 210) | 112 (84 to 151) | -30.6% (-35.9% to -24.4%) |
| Kyrgyzstan                       | Fire, heat, and hot substances                  | 4 (3 to 7)       | 3 (2 to 5)      | -27.1% (-36.9% to -17.3%) |
| Kyrgyzstan                       | Foreign body in eyes                            | 0 (0 to 0)       | 0 (0 to 0)      | 1.1% (0.6% to 1.9%)       |
| Kyrgyzstan                       | Foreign body in other body part                 | 2 (1 to 4)       | 2 (1 to 4)      | 1.2% (-4.6% to 6.8%)      |
| Kyrgyzstan                       | Motor vehicle road injuries                     | 71 (55 to 88)    | 66 (51 to 82)   | -7% (-16.4% to 3.2%)      |
| Kyrgyzstan                       | Motorcyclist road injuries                      | 9 (7 to 12)      | 6 (4 to 7)      | -38.3% (-47.9% to -27.9%) |
| Kyrgyzstan                       | Non-venomous animal contact                     | 3 (2 to 5)       | 3 (2 to 5)      | 8.9% (3.2% to 15.4%)      |
| Kyrgyzstan                       | Other exposure to mechanical forces             | 49 (30 to 77)    | 48 (29 to 76)   | -1.7% (-7.2% to 3.1%)     |
| Kyrgyzstan                       | Other road injuries                             | 3 (2 to 5)       | 2 (1 to 4)      | -25.7% (-35.3% to -15.3%) |
| Kyrgyzstan                       | Other transport injuries                        | 5 (3 to 6)       | 5 (3 to 6)      | -2.4% (-7.7% to 3.2%)     |
| Kyrgyzstan                       | Other unintentional injuries                    | 25 (16 to 40)    | 20 (12 to 32)   | -22% (-28.9% to -15.3%)   |
| Kyrgyzstan                       | Pedestrian road injuries                        | 31 (24 to 39)    | 27 (21 to 35)   | -11.3% (-21.5% to 0%)     |
| Kyrgyzstan                       | Physical violence by firearm                    | 0 (0 to 0)       | 0 (0 to 0)      | -11.2% (-29.2% to 6.5%)   |
| Kyrgyzstan                       | Physical violence by other means                | 29 (21 to 40)    | 14 (10 to 21)   | -49.5% (-55.3% to -42.9%) |
| Kyrgyzstan                       | Physical violence by sharp object               | 5 (3 to 8)       | 2 (1 to 4)      | -52.3% (-61.2% to -43.3%) |
| Kyrgyzstan                       | Poisoning by carbon monoxide                    | 0 (0 to 0)       | 0 (0 to 0)      | -19.3% (-34.8% to -2.1%)  |
| Kyrgyzstan                       | Poisoning by other means                        | 0 (0 to 1)       | 0 (0 to 1)      | -19.7% (-30.3% to -8.5%)  |
| Kyrgyzstan                       | Pulmonary aspiration and foreign body in airway | 1 (1 to 2)       | 1 (1 to 2)      | -16.2% (-24.4% to -7.7%)  |
| Kyrgyzstan                       | Self-harm by firearm                            | 0 (0 to 1)       | 0 (0 to 0)      | -26% (-39.6% to -10.7%)   |
| Kyrgyzstan                       | Self-harm by other specified means              | 3 (2 to 4)       | 2 (2 to 4)      | -19.4% (-24.2% to -15%)   |
| Kyrgyzstan                       | Unintentional firearm injuries                  | 1 (0 to 2)       | 1 (0 to 1)      | -5.1% (-13.5% to 3.7%)    |
| Kyrgyzstan                       | Venomous animal contact                         | 3 (1 to 5)       | 3 (1 to 6)      | 3.8% (-2.4% to 9.5%)      |
| Lao People's Democratic Republic | Adverse effects of medical treatment            | 0 (0 to 0)       | 0 (0 to 0)      | 0% (0% to 0%)             |
| Lao People's Democratic Republic | Conflict and terrorism                          | 38 (10 to 107)   | 0 (0 to 0)      | NA                        |
| Lao People's Democratic Republic | Cyclist road injuries                           | 20 (14 to 29)    | 18 (13 to 26)   | -9.9% (-18.2% to -1.3%)   |
| Lao People's Democratic Republic | Drowning                                        | 1 (0 to 1)       | 0 (0 to 1)      | -46.7% (-49.9% to -41.9%) |
| Lao People's Democratic Republic | Environmental heat and cold exposure            | 1 (1 to 2)       | 1 (1 to 2)      | -6.7% (-12.4% to -0.6%)   |
| Lao People's Democratic Republic | Executions and police conflict                  | 0 (0 to 0)       | 0 (0 to 0)      | NA                        |
| Lao People's Democratic Republic | Exposure to forces of nature                    | 0 (0 to 0)       | 0 (0 to 0)      | NA                        |
| Lao People's Democratic Republic | Falls                                           | 45 (35 to 58)    | 60 (48 to 77)   | 34.5% (29.2% to 40.4%)    |
| Lao People's Democratic Republic | Fire, heat, and hot substances                  | 2 (1 to 3)       | 1 (1 to 2)      | -35.1% (-41.5% to -29.3%) |
| Lao People's Democratic Republic | Foreign body in eyes                            | 0 (0 to 0)       | 0 (0 to 0)      | 1.8% (1.2% to 2.6%)       |
| Lao People's Democratic Republic | Foreign body in other body part                 | 1 (0 to 2)       | 1 (0 to 2)      | -5.8% (-11.3% to -0.1%)   |
| Lao People's Democratic Republic | Motor vehicle road injuries                     | 28 (20 to 37)    | 24 (18 to 32)   | -12.5% (-20.1% to -4.4%)  |
| Lao People's Democratic Republic | Motorcyclist road injuries                      | 45 (36 to 57)    | 46 (37 to 58)   | 2.3% (-6.4% to 11.2%)     |
| Lao People's Democratic Republic | Non-venomous animal contact                     | 7 (4 to 12)      | 4 (3 to 7)      | -37.8% (-41.8% to -33.7%) |
| Lao People's Democratic Republic | Other exposure to mechanical forces             | 18 (11 to 30)    | 16 (9 to 25)    | -14.6% (-21.5% to -8.6%)  |
| Lao People's Democratic Republic | Other road injuries                             | 1 (1 to 2)       | 1 (1 to 2)      | 0.5% (-9.7% to 11.1%)     |
| Lao People's Democratic Republic | Other transport injuries                        | 6 (5 to 8)       | 4 (3 to 6)      | -26.3% (-32.2% to -19.9%) |
| Lao People's Democratic Republic | Other unintentional injuries                    | 10 (7 to 16)     | 9 (6 to 14)     | -15.2% (-20.8% to -9.1%)  |
| Lao People's Democratic Republic | Pedestrian road injuries                        | 21 (16 to 27)    | 15 (11 to 19)   | -28.6% (-33.9% to -22.8%) |
| Lao People's Democratic Republic | Physical violence by firearm                    | 0 (0 to 1)       | 0 (0 to 0)      | -24.4% (-31.7% to -15.6%) |
| Lao People's Democratic Republic | Physical violence by other means                | 34 (24 to 49)    | 26 (18 to 37)   | -24.1% (-29.1% to -18.8%) |

|                                  |                                                 |                  |                  |                           |
|----------------------------------|-------------------------------------------------|------------------|------------------|---------------------------|
| Lao People's Democratic Republic | Physical violence by sharp object               | 7 (4 to 11)      | 6 (4 to 9)       | -20.5% (-28.7% to -11.5%) |
| Lao People's Democratic Republic | Poisoning by carbon monoxide                    | 0 (0 to 0)       | 0 (0 to 0)       | 16.6% (-2.7% to 38.6%)    |
| Lao People's Democratic Republic | Poisoning by other means                        | 0 (0 to 0)       | 0 (0 to 0)       | -28.3% (-37.2% to -19.1%) |
| Lao People's Democratic Republic | Pulmonary aspiration and foreign body in airway | 0 (0 to 0)       | 0 (0 to 0)       | -39.6% (-47.6% to -32.1%) |
| Lao People's Democratic Republic | Self-harm by firearm                            | 0 (0 to 0)       | 0 (0 to 0)       | -12.4% (-28.4% to 7%)     |
| Lao People's Democratic Republic | Self-harm by other specified means              | 2 (1 to 3)       | 1 (1 to 2)       | -28% (-32.2% to -23.7%)   |
| Lao People's Democratic Republic | Unintentional firearm injuries                  | 2 (1 to 3)       | 2 (1 to 3)       | -17.4% (-26.9% to -8.4%)  |
| Lao People's Democratic Republic | Venomous animal contact                         | 2 (0 to 3)       | 1 (0 to 2)       | -33.9% (-41.4% to -27.3%) |
| Latvia                           | Adverse effects of medical treatment            | 0 (0 to 0)       | 0 (0 to 0)       | 0% (0% to 0%)             |
| Latvia                           | Conflict and terrorism                          | 0 (0 to 0)       | 0 (0 to 0)       | NA                        |
| Latvia                           | Cyclist road injuries                           | 78 (56 to 106)   | 46 (33 to 62)    | -41.3% (-49.7% to -31.8%) |
| Latvia                           | Drowning                                        | 1 (1 to 2)       | 1 (1 to 2)       | -17% (-25.5% to -8.3%)    |
| Latvia                           | Environmental heat and cold exposure            | 10 (7 to 14)     | 11 (8 to 15)     | 15.6% (5% to 28.7%)       |
| Latvia                           | Executions and police conflict                  | 0 (0 to 0)       | 0 (0 to 0)       | NA                        |
| Latvia                           | Exposure to forces of nature                    | 0 (0 to 0)       | 0 (0 to 0)       | NA                        |
| Latvia                           | Falls                                           | 407 (322 to 516) | 266 (208 to 341) | -34.6% (-38.4% to -30.9%) |
| Latvia                           | Fire, heat, and hot substances                  | 7 (4 to 11)      | 4 (3 to 7)       | -40% (-45.5% to -33.8%)   |
| Latvia                           | Foreign body in eyes                            | 0 (0 to 0)       | 0 (0 to 0)       | 1.1% (0.6% to 1.9%)       |
| Latvia                           | Foreign body in other body part                 | 2 (1 to 4)       | 2 (1 to 4)       | 2.2% (-3.6% to 8.5%)      |
| Latvia                           | Motor vehicle road injuries                     | 199 (156 to 248) | 98 (76 to 123)   | -50.6% (-57.9% to -41.7%) |
| Latvia                           | Motorcyclist road injuries                      | 24 (18 to 31)    | 12 (9 to 16)     | -48.8% (-58.7% to -37.6%) |
| Latvia                           | Non-venomous animal contact                     | 4 (2 to 7)       | 4 (2 to 6)       | -9.4% (-15.1% to -4.2%)   |
| Latvia                           | Other exposure to mechanical forces             | 109 (69 to 170)  | 84 (52 to 131)   | -23.3% (-31.3% to -14.6%) |
| Latvia                           | Other road injuries                             | 2 (1 to 4)       | 2 (1 to 3)       | -15.1% (-26.9% to -1.5%)  |
| Latvia                           | Other transport injuries                        | 10 (8 to 13)     | 6 (5 to 8)       | -39.1% (-46% to -32.4%)   |
| Latvia                           | Other unintentional injuries                    | 27 (17 to 44)    | 24 (15 to 40)    | -10.5% (-18.5% to -2.7%)  |
| Latvia                           | Pedestrian road injuries                        | 97 (75 to 122)   | 36 (27 to 46)    | -63% (-68.4% to -57.4%)   |
| Latvia                           | Physical violence by firearm                    | 0 (0 to 1)       | 0 (0 to 1)       | -17.5% (-36.6% to 5.1%)   |
| Latvia                           | Physical violence by other means                | 44 (32 to 61)    | 28 (20 to 39)    | -37.1% (-43.6% to -30.1%) |
| Latvia                           | Physical violence by sharp object               | 6 (4 to 9)       | 3 (2 to 5)       | -45.7% (-54.8% to -36.3%) |
| Latvia                           | Poisoning by carbon monoxide                    | 0 (0 to 0)       | 0 (0 to 0)       | -3.3% (-21.1% to 14.7%)   |
| Latvia                           | Poisoning by other means                        | 0 (0 to 1)       | 0 (0 to 1)       | 2.2% (-11.8% to 15.4%)    |
| Latvia                           | Pulmonary aspiration and foreign body in airway | 1 (1 to 2)       | 1 (0 to 1)       | -21.9% (-28.8% to -14.3%) |
| Latvia                           | Self-harm by firearm                            | 2 (1 to 3)       | 1 (1 to 2)       | -40.8% (-48.9% to -31.9%) |
| Latvia                           | Self-harm by other specified means              | 5 (3 to 8)       | 4 (2 to 6)       | -31.9% (-36.4% to -26.7%) |
| Latvia                           | Unintentional firearm injuries                  | 1 (1 to 2)       | 1 (1 to 2)       | -1.6% (-15.6% to 13.6%)   |
| Latvia                           | Venomous animal contact                         | 3 (1 to 6)       | 3 (1 to 5)       | -8.5% (-14.6% to -2.5%)   |
| Lebanon                          | Adverse effects of medical treatment            | 0 (0 to 0)       | 0 (0 to 0)       | 0% (0% to 0%)             |
| Lebanon                          | Conflict and terrorism                          | 136 (51 to 324)  | 1 (0 to 2)       | NA                        |
| Lebanon                          | Cyclist road injuries                           | 12 (8 to 17)     | 12 (8 to 17)     | 0% (-7.7% to 9.5%)        |
| Lebanon                          | Drowning                                        | 0 (0 to 0)       | 0 (0 to 1)       | 115.2% (89.4% to 143.2%)  |
| Lebanon                          | Environmental heat and cold exposure            | 3 (2 to 4)       | 3 (2 to 4)       | 3.6% (-1.9% to 7.7%)      |
| Lebanon                          | Executions and police conflict                  | 0 (0 to 0)       | 0 (0 to 0)       | NA                        |

|         |                                                 |                |                |                           |
|---------|-------------------------------------------------|----------------|----------------|---------------------------|
| Lebanon | Exposure to forces of nature                    | 0 (0 to 0)     | 0 (0 to 0)     | NA                        |
| Lebanon | Falls                                           | 64 (49 to 86)  | 98 (75 to 132) | 53.7% (47.8% to 59.8%)    |
| Lebanon | Fire, heat, and hot substances                  | 1 (1 to 2)     | 1 (0 to 1)     | -23.7% (-30.2% to -17%)   |
| Lebanon | Foreign body in eyes                            | 0 (0 to 0)     | 0 (0 to 0)     | -0.7% (-1.6% to -0.2%)    |
| Lebanon | Foreign body in other body part                 | 1 (1 to 3)     | 1 (1 to 3)     | -0.8% (-5.8% to 4.6%)     |
| Lebanon | Motor vehicle road injuries                     | 27 (21 to 35)  | 21 (16 to 27)  | -21.6% (-27.7% to -15%)   |
| Lebanon | Motorcyclist road injuries                      | 8 (6 to 11)    | 8 (6 to 10)    | -6.1% (-14.3% to 3.8%)    |
| Lebanon | Non-venomous animal contact                     | 3 (2 to 6)     | 3 (2 to 6)     | -3.4% (-8.9% to 2.1%)     |
| Lebanon | Other exposure to mechanical forces             | 27 (16 to 44)  | 24 (14 to 40)  | -10.2% (-16.1% to -5%)    |
| Lebanon | Other road injuries                             | 2 (1 to 3)     | 2 (1 to 3)     | 2.4% (-6.2% to 12.5%)     |
| Lebanon | Other transport injuries                        | 5 (4 to 7)     | 5 (4 to 8)     | 0.2% (-4.8% to 5.7%)      |
| Lebanon | Other unintentional injuries                    | 19 (12 to 31)  | 17 (11 to 29)  | -6.7% (-11.7% to -1.1%)   |
| Lebanon | Pedestrian road injuries                        | 14 (11 to 19)  | 12 (9 to 15)   | -17.8% (-24.3% to -10.7%) |
| Lebanon | Physical violence by firearm                    | 1 (1 to 2)     | 1 (1 to 2)     | 8.6% (-10.8% to 33.3%)    |
| Lebanon | Physical violence by other means                | 77 (57 to 106) | 28 (20 to 40)  | -63.8% (-69.3% to -57.2%) |
| Lebanon | Physical violence by sharp object               | 10 (7 to 16)   | 2 (2 to 4)     | -76.1% (-80.3% to -71.1%) |
| Lebanon | Poisoning by carbon monoxide                    | 0 (0 to 0)     | 0 (0 to 0)     | 29.1% (15.3% to 43.4%)    |
| Lebanon | Poisoning by other means                        | 0 (0 to 0)     | 0 (0 to 0)     | -20.5% (-28.8% to -13.3%) |
| Lebanon | Pulmonary aspiration and foreign body in airway | 0 (0 to 1)     | 0 (0 to 1)     | -14.4% (-22.4% to -5.6%)  |
| Lebanon | Self-harm by firearm                            | 0 (0 to 0)     | 0 (0 to 0)     | 42.5% (28.5% to 58.9%)    |
| Lebanon | Self-harm by other specified means              | 1 (1 to 2)     | 1 (1 to 2)     | 14.9% (9.1% to 22%)       |
| Lebanon | Unintentional firearm injuries                  | 2 (1 to 3)     | 2 (1 to 3)     | -1.3% (-9.3% to 6.9%)     |
| Lebanon | Venomous animal contact                         | 2 (1 to 4)     | 2 (1 to 4)     | 0.1% (-5.8% to 6.9%)      |
| Lesotho | Adverse effects of medical treatment            | 0 (0 to 0)     | 0 (0 to 0)     | 0% (0% to 0%)             |
| Lesotho | Conflict and terrorism                          | 0 (0 to 0)     | 0 (0 to 0)     | NA                        |
| Lesotho | Cyclist road injuries                           | 9 (5 to 14)    | 13 (8 to 20)   | 48.8% (36.5% to 63.1%)    |
| Lesotho | Drowning                                        | 0 (0 to 0)     | 0 (0 to 0)     | 1.2% (-8.3% to 10.3%)     |
| Lesotho | Environmental heat and cold exposure            | 0 (0 to 1)     | 0 (0 to 1)     | 5% (-0.9% to 11%)         |
| Lesotho | Executions and police conflict                  | 0 (0 to 0)     | 0 (0 to 0)     | NA                        |
| Lesotho | Exposure to forces of nature                    | 5 (3 to 9)     | 0 (0 to 0)     | NA                        |
| Lesotho | Falls                                           | 20 (13 to 31)  | 24 (15 to 37)  | 19.9% (15% to 25.8%)      |
| Lesotho | Fire, heat, and hot substances                  | 0 (0 to 0)     | 0 (0 to 0)     | 21.5% (12.9% to 31.7%)    |
| Lesotho | Foreign body in eyes                            | 0 (0 to 0)     | 0 (0 to 0)     | -0.3% (-0.8% to 0.3%)     |
| Lesotho | Foreign body in other body part                 | 4 (2 to 9)     | 4 (2 to 8)     | -5.8% (-11.4% to -0.7%)   |
| Lesotho | Motor vehicle road injuries                     | 23 (15 to 33)  | 37 (25 to 53)  | 63.7% (50.4% to 78.2%)    |
| Lesotho | Motorcyclist road injuries                      | 6 (4 to 9)     | 12 (8 to 17)   | 91.8% (71.6% to 116.8%)   |
| Lesotho | Non-venomous animal contact                     | 4 (2 to 8)     | 4 (2 to 8)     | -4.7% (-9.8% to 1.1%)     |
| Lesotho | Other exposure to mechanical forces             | 28 (14 to 50)  | 28 (14 to 50)  | -0.3% (-5.9% to 5.3%)     |
| Lesotho | Other road injuries                             | 1 (1 to 2)     | 1 (1 to 3)     | 29.7% (18.7% to 41.4%)    |
| Lesotho | Other transport injuries                        | 4 (3 to 6)     | 4 (3 to 6)     | 2.4% (-3.7% to 9.5%)      |
| Lesotho | Other unintentional injuries                    | 3 (1 to 5)     | 2 (1 to 4)     | -4% (-9.4% to 2%)         |
| Lesotho | Pedestrian road injuries                        | 33 (25 to 43)  | 50 (36 to 65)  | 49.5% (38.4% to 59.9%)    |
| Lesotho | Physical violence by firearm                    | 0 (0 to 1)     | 1 (0 to 1)     | 22.6% (10% to 34.6%)      |



|         |                                                 |                   |                |                           |
|---------|-------------------------------------------------|-------------------|----------------|---------------------------|
| Lesotho | Physical violence by other means                | 16 (11 to 24)     | 22 (14 to 33)  | 37.3% (26.8% to 49.2%)    |
| Lesotho | Physical violence by sharp object               | 5 (3 to 9)        | 7 (4 to 12)    | 36.5% (21.8% to 51.1%)    |
| Lesotho | Poisoning by carbon monoxide                    | 0 (0 to 0)        | 0 (0 to 0)     | 5.5% (-3.8% to 15.2%)     |
| Lesotho | Poisoning by other means                        | 0 (0 to 0)        | 0 (0 to 0)     | 0.2% (-7.3% to 8.7%)      |
| Lesotho | Pulmonary aspiration and foreign body in airway | 0 (0 to 0)        | 0 (0 to 0)     | -1.6% (-9.5% to 8.4%)     |
| Lesotho | Self-harm by firearm                            | 0 (0 to 0)        | 0 (0 to 0)     | 101.4% (82.4% to 124.1%)  |
| Lesotho | Self-harm by other specified means              | 0 (0 to 0)        | 0 (0 to 1)     | 68.4% (56.4% to 82.5%)    |
| Lesotho | Unintentional firearm injuries                  | 1 (0 to 1)        | 1 (0 to 1)     | -9.8% (-17.7% to -0.8%)   |
| Lesotho | Venomous animal contact                         | 0 (0 to 1)        | 0 (0 to 1)     | -14.3% (-20.6% to -7.6%)  |
| Liberia | Adverse effects of medical treatment            | 0 (0 to 0)        | 0 (0 to 0)     | 0% (0% to 0%)             |
| Liberia | Conflict and terrorism                          | 792 (244 to 1989) | 0 (0 to 0)     | NA                        |
| Liberia | Cyclist road injuries                           | 24 (15 to 35)     | 26 (17 to 38)  | 6.3% (-0.6% to 13.9%)     |
| Liberia | Drowning                                        | 0 (0 to 0)        | 0 (0 to 0)     | -14.4% (-22.2% to -6.9%)  |
| Liberia | Environmental heat and cold exposure            | 0 (0 to 1)        | 0 (0 to 1)     | 3.9% (-3.2% to 11.9%)     |
| Liberia | Executions and police conflict                  | 0 (0 to 0)        | 0 (0 to 0)     | NA                        |
| Liberia | Exposure to forces of nature                    | 0 (0 to 0)        | 0 (0 to 0)     | NA                        |
| Liberia | Falls                                           | 17 (11 to 25)     | 19 (12 to 29)  | 15.6% (10.5% to 21.1%)    |
| Liberia | Fire, heat, and hot substances                  | 0 (0 to 0)        | 0 (0 to 0)     | -8.9% (-15.6% to -2.3%)   |
| Liberia | Foreign body in eyes                            | 0 (0 to 0)        | 0 (0 to 0)     | 0.1% (-0.3% to 0.9%)      |
| Liberia | Foreign body in other body part                 | 4 (2 to 8)        | 4 (1 to 7)     | -4.5% (-9.8% to 0.8%)     |
| Liberia | Motor vehicle road injuries                     | 42 (29 to 59)     | 41 (28 to 57)  | -3.5% (-10.2% to 3.5%)    |
| Liberia | Motorcyclist road injuries                      | 20 (14 to 27)     | 19 (14 to 27)  | -0.5% (-7.6% to 7%)       |
| Liberia | Non-venomous animal contact                     | 3 (1 to 6)        | 3 (1 to 6)     | 5.9% (1.2% to 11%)        |
| Liberia | Other exposure to mechanical forces             | 24 (12 to 45)     | 22 (11 to 40)  | -10.4% (-17.1% to -4.5%)  |
| Liberia | Other road injuries                             | 2 (1 to 3)        | 2 (1 to 4)     | 8.7% (-0.3% to 18.4%)     |
| Liberia | Other transport injuries                        | 3 (2 to 4)        | 3 (2 to 4)     | 1.2% (-7.6% to 9.8%)      |
| Liberia | Other unintentional injuries                    | 3 (2 to 5)        | 2 (1 to 4)     | -14.8% (-21.5% to -8.9%)  |
| Liberia | Pedestrian road injuries                        | 44 (32 to 58)     | 42 (30 to 56)  | -5.8% (-11.8% to 0.5%)    |
| Liberia | Physical violence by firearm                    | 0 (0 to 0)        | 0 (0 to 0)     | 1.9% (-12.5% to 18.8%)    |
| Liberia | Physical violence by other means                | 6 (4 to 9)        | 4 (3 to 7)     | -26.6% (-32.6% to -20.1%) |
| Liberia | Physical violence by sharp object               | 2 (1 to 3)        | 1 (1 to 2)     | -23% (-29.4% to -15.4%)   |
| Liberia | Poisoning by carbon monoxide                    | 0 (0 to 0)        | 0 (0 to 0)     | 8.9% (-4% to 24.6%)       |
| Liberia | Poisoning by other means                        | 0 (0 to 0)        | 0 (0 to 0)     | -17.3% (-25.3% to -9.1%)  |
| Liberia | Pulmonary aspiration and foreign body in airway | 0 (0 to 0)        | 0 (0 to 0)     | -17.5% (-27.9% to -7.5%)  |
| Liberia | Self-harm by firearm                            | 0 (0 to 0)        | 0 (0 to 0)     | 13.8% (6.6% to 22%)       |
| Liberia | Self-harm by other specified means              | 0 (0 to 0)        | 0 (0 to 0)     | 10.8% (4.9% to 17.6%)     |
| Liberia | Unintentional firearm injuries                  | 1 (0 to 2)        | 1 (0 to 2)     | -18.9% (-26.5% to -10.8%) |
| Liberia | Venomous animal contact                         | 0 (0 to 1)        | 0 (0 to 1)     | 5.8% (-1.7% to 13.7%)     |
| Libya   | Adverse effects of medical treatment            | 0 (0 to 0)        | 0 (0 to 0)     | 0% (0% to 0%)             |
| Libya   | Conflict and terrorism                          | 0 (0 to 0)        | 76 (31 to 175) | NA                        |
| Libya   | Cyclist road injuries                           | 17 (11 to 25)     | 16 (11 to 23)  | -6.3% (-15.4% to 3.7%)    |
| Libya   | Drowning                                        | 0 (0 to 0)        | 0 (0 to 0)     | 16.6% (2% to 35.5%)       |
| Libya   | Environmental heat and cold exposure            | 3 (2 to 4)        | 3 (2 to 4)     | 0.4% (-4.4% to 4.8%)      |

|           |                                                 |                  |                  |                           |
|-----------|-------------------------------------------------|------------------|------------------|---------------------------|
| Libya     | Executions and police conflict                  | 0 (0 to 0)       | 2 (1 to 4)       | NA                        |
| Libya     | Exposure to forces of nature                    | 0 (0 to 0)       | 0 (0 to 0)       | NA                        |
| Libya     | Falls                                           | 81 (63 to 105)   | 95 (73 to 125)   | 18% (13.4% to 22.8%)      |
| Libya     | Fire, heat, and hot substances                  | 1 (1 to 2)       | 1 (0 to 1)       | -27.3% (-32.7% to -21.6%) |
| Libya     | Foreign body in eyes                            | 0 (0 to 0)       | 0 (0 to 0)       | -1.4% (-2.6% to -0.5%)    |
| Libya     | Foreign body in other body part                 | 1 (1 to 3)       | 1 (1 to 3)       | -0.9% (-5.1% to 4.7%)     |
| Libya     | Motor vehicle road injuries                     | 66 (52 to 83)    | 48 (38 to 61)    | -27% (-32.4% to -21.3%)   |
| Libya     | Motorcyclist road injuries                      | 12 (9 to 16)     | 10 (8 to 14)     | -11.8% (-21.3% to -1.8%)  |
| Libya     | Non-venomous animal contact                     | 3 (1 to 5)       | 3 (2 to 5)       | 18.2% (12.7% to 23.6%)    |
| Libya     | Other exposure to mechanical forces             | 29 (18 to 45)    | 24 (14 to 38)    | -16% (-21.7% to -11.1%)   |
| Libya     | Other road injuries                             | 2 (1 to 4)       | 2 (1 to 3)       | -2.7% (-12.2% to 7.9%)    |
| Libya     | Other transport injuries                        | 5 (4 to 7)       | 5 (4 to 7)       | -5.3% (-11.5% to 0.7%)    |
| Libya     | Other unintentional injuries                    | 18 (12 to 29)    | 16 (10 to 27)    | -10.2% (-15.7% to -4.4%)  |
| Libya     | Pedestrian road injuries                        | 36 (27 to 45)    | 27 (20 to 33)    | -25.2% (-31.4% to -19%)   |
| Libya     | Physical violence by firearm                    | 0 (0 to 0)       | 2 (1 to 2)       | 509.9% (398.5% to 654.9%) |
| Libya     | Physical violence by other means                | 14 (10 to 20)    | 43 (32 to 59)    | 213.6% (165.9% to 271.4%) |
| Libya     | Physical violence by sharp object               | 2 (1 to 3)       | 5 (3 to 7)       | 130.9% (93.1% to 176.2%)  |
| Libya     | Poisoning by carbon monoxide                    | 0 (0 to 0)       | 0 (0 to 0)       | 14.7% (3.3% to 26.1%)     |
| Libya     | Poisoning by other means                        | 0 (0 to 0)       | 0 (0 to 0)       | -21.6% (-27.9% to -15.2%) |
| Libya     | Pulmonary aspiration and foreign body in airway | 0 (0 to 1)       | 0 (0 to 1)       | -5.6% (-13.8% to 2.9%)    |
| Libya     | Self-harm by firearm                            | 0 (0 to 0)       | 0 (0 to 0)       | 24.7% (10.8% to 40.3%)    |
| Libya     | Self-harm by other specified means              | 1 (1 to 2)       | 1 (1 to 2)       | 12.6% (7.2% to 18.8%)     |
| Libya     | Unintentional firearm injuries                  | 2 (1 to 3)       | 1 (1 to 2)       | -9% (-17.3% to -0.1%)     |
| Libya     | Venomous animal contact                         | 2 (1 to 3)       | 2 (1 to 4)       | 18.6% (11.9% to 25.6%)    |
| Lithuania | Adverse effects of medical treatment            | 0 (0 to 0)       | 0 (0 to 0)       | 0% (0% to 0%)             |
| Lithuania | Conflict and terrorism                          | 0 (0 to 0)       | 0 (0 to 0)       | NA                        |
| Lithuania | Cyclist road injuries                           | 85 (63 to 113)   | 53 (38 to 71)    | -38.2% (-46.7% to -30%)   |
| Lithuania | Drowning                                        | 1 (1 to 2)       | 1 (0 to 1)       | -23.4% (-31.1% to -15.3%) |
| Lithuania | Environmental heat and cold exposure            | 12 (9 to 17)     | 13 (9 to 17)     | 4% (-2.8% to 13.1%)       |
| Lithuania | Executions and police conflict                  | 0 (0 to 0)       | 0 (0 to 0)       | NA                        |
| Lithuania | Exposure to forces of nature                    | 0 (0 to 0)       | 0 (0 to 0)       | NA                        |
| Lithuania | Falls                                           | 359 (283 to 459) | 305 (242 to 392) | -15% (-19.3% to -10.4%)   |
| Lithuania | Fire, heat, and hot substances                  | 5 (3 to 7)       | 3 (2 to 6)       | -25.1% (-33.3% to -16.9%) |
| Lithuania | Foreign body in eyes                            | 0 (0 to 0)       | 0 (0 to 0)       | 0.6% (0.3% to 1.1%)       |
| Lithuania | Foreign body in other body part                 | 2 (1 to 4)       | 2 (1 to 4)       | 2.2% (-3.6% to 7.6%)      |
| Lithuania | Motor vehicle road injuries                     | 178 (137 to 225) | 105 (82 to 132)  | -40.9% (-49.4% to -32.4%) |
| Lithuania | Motorcyclist road injuries                      | 15 (11 to 20)    | 13 (9 to 17)     | -17.7% (-31.4% to -5.3%)  |
| Lithuania | Non-venomous animal contact                     | 4 (2 to 7)       | 4 (2 to 7)       | -11.9% (-16.8% to -7%)    |
| Lithuania | Other exposure to mechanical forces             | 91 (56 to 143)   | 82 (50 to 129)   | -10% (-17.5% to -2.7%)    |
| Lithuania | Other road injuries                             | 4 (2 to 6)       | 2 (1 to 4)       | -40.6% (-50.1% to -30.3%) |
| Lithuania | Other transport injuries                        | 7 (5 to 9)       | 6 (4 to 8)       | -14.4% (-21.6% to -7.1%)  |
| Lithuania | Other unintentional injuries                    | 32 (20 to 51)    | 25 (15 to 42)    | -21.4% (-28.8% to -14.2%) |
| Lithuania | Pedestrian road injuries                        | 108 (84 to 134)  | 40 (31 to 51)    | -62.5% (-67.2% to -57.5%) |

|            |                                                 |                  |                  |                           |
|------------|-------------------------------------------------|------------------|------------------|---------------------------|
| Lithuania  | Physical violence by firearm                    | 0 (0 to 1)       | 0 (0 to 1)       | -31.4% (-48.5% to -11%)   |
| Lithuania  | Physical violence by other means                | 35 (26 to 50)    | 27 (19 to 37)    | -25.1% (-33.1% to -16.8%) |
| Lithuania  | Physical violence by sharp object               | 5 (3 to 8)       | 3 (2 to 5)       | -40.5% (-50.7% to -31.4%) |
| Lithuania  | Poisoning by carbon monoxide                    | 0 (0 to 0)       | 0 (0 to 0)       | -1.1% (-12.5% to 10.7%)   |
| Lithuania  | Poisoning by other means                        | 0 (0 to 1)       | 0 (0 to 1)       | -8% (-17.5% to 1.4%)      |
| Lithuania  | Pulmonary aspiration and foreign body in airway | 1 (1 to 2)       | 1 (1 to 2)       | -18.7% (-25.7% to -11.9%) |
| Lithuania  | Self-harm by firearm                            | 1 (1 to 2)       | 1 (1 to 2)       | -23.5% (-36.4% to -8.6%)  |
| Lithuania  | Self-harm by other specified means              | 7 (5 to 11)      | 6 (4 to 10)      | -8.4% (-13.9% to -2.6%)   |
| Lithuania  | Unintentional firearm injuries                  | 1 (1 to 2)       | 1 (1 to 2)       | -10.4% (-22.2% to 1.6%)   |
| Lithuania  | Venomous animal contact                         | 3 (1 to 6)       | 3 (1 to 6)       | -7.1% (-12.5% to -1.4%)   |
| Luxembourg | Adverse effects of medical treatment            | 0 (0 to 0)       | 0 (0 to 0)       | 0% (0% to 0%)             |
| Luxembourg | Conflict and terrorism                          | 0 (0 to 0)       | 0 (0 to 0)       | NA                        |
| Luxembourg | Cyclist road injuries                           | 26 (18 to 35)    | 20 (14 to 27)    | -22% (-32.7% to -10.3%)   |
| Luxembourg | Drowning                                        | 0 (0 to 0)       | 0 (0 to 0)       | 77.3% (61.4% to 97%)      |
| Luxembourg | Environmental heat and cold exposure            | 2 (1 to 3)       | 2 (1 to 3)       | 0.2% (-4.8% to 4.3%)      |
| Luxembourg | Executions and police conflict                  | 0 (0 to 0)       | 0 (0 to 0)       | NA                        |
| Luxembourg | Exposure to forces of nature                    | 0 (0 to 0)       | 0 (0 to 0)       | NA                        |
| Luxembourg | Falls                                           | 290 (228 to 366) | 304 (239 to 386) | 5% (-0.2% to 10.4%)       |
| Luxembourg | Fire, heat, and hot substances                  | 2 (1 to 4)       | 2 (1 to 4)       | -2.7% (-7.9% to 3%)       |
| Luxembourg | Foreign body in eyes                            | 0 (0 to 0)       | 0 (0 to 0)       | 0.7% (0.2% to 1.7%)       |
| Luxembourg | Foreign body in other body part                 | 2 (1 to 3)       | 2 (1 to 3)       | 1.5% (-3.1% to 6.4%)      |
| Luxembourg | Motor vehicle road injuries                     | 56 (44 to 71)    | 24 (18 to 32)    | -56.9% (-62.8% to -50.4%) |
| Luxembourg | Motorcyclist road injuries                      | 11 (8 to 15)     | 10 (7 to 13)     | -13% (-27.3% to 3.1%)     |
| Luxembourg | Non-venomous animal contact                     | 2 (1 to 4)       | 2 (1 to 3)       | -19.2% (-23.2% to -15.1%) |
| Luxembourg | Other exposure to mechanical forces             | 56 (35 to 88)    | 44 (27 to 71)    | -21.1% (-28.4% to -13.7%) |
| Luxembourg | Other road injuries                             | 1 (1 to 2)       | 1 (1 to 2)       | -7.5% (-20.4% to 8.1%)    |
| Luxembourg | Other transport injuries                        | 4 (3 to 6)       | 4 (3 to 6)       | -0.6% (-6.5% to 5.3%)     |
| Luxembourg | Other unintentional injuries                    | 45 (30 to 69)    | 25 (16 to 39)    | -44.9% (-49.7% to -40%)   |
| Luxembourg | Pedestrian road injuries                        | 17 (13 to 22)    | 7 (5 to 9)       | -61.4% (-67.5% to -53.9%) |
| Luxembourg | Physical violence by firearm                    | 0 (0 to 1)       | 1 (0 to 1)       | 57.8% (37.9% to 79.7%)    |
| Luxembourg | Physical violence by other means                | 19 (13 to 27)    | 15 (10 to 22)    | -19.6% (-26.2% to -12.2%) |
| Luxembourg | Physical violence by sharp object               | 2 (1 to 3)       | 1 (1 to 2)       | -17.2% (-29.4% to -6.4%)  |
| Luxembourg | Poisoning by carbon monoxide                    | 0 (0 to 0)       | 0 (0 to 0)       | 4.8% (-3.5% to 13.7%)     |
| Luxembourg | Poisoning by other means                        | 0 (0 to 0)       | 0 (0 to 0)       | -8.3% (-14.6% to -2.8%)   |
| Luxembourg | Pulmonary aspiration and foreign body in airway | 1 (1 to 2)       | 1 (0 to 1)       | -22.8% (-30.6% to -16.3%) |
| Luxembourg | Self-harm by firearm                            | 1 (0 to 1)       | 1 (0 to 1)       | -15% (-26.9% to -0.9%)    |
| Luxembourg | Self-harm by other specified means              | 4 (2 to 6)       | 2 (1 to 4)       | -36.8% (-41.2% to -32.8%) |
| Luxembourg | Unintentional firearm injuries                  | 1 (1 to 2)       | 1 (1 to 2)       | -0.7% (-10.7% to 10.4%)   |
| Luxembourg | Venomous animal contact                         | 1 (0 to 2)       | 1 (0 to 2)       | -18.1% (-23.3% to -13%)   |
| Madagascar | Adverse effects of medical treatment            | 0 (0 to 0)       | 0 (0 to 0)       | 0% (0% to 0%)             |
| Madagascar | Conflict and terrorism                          | 0 (0 to 0)       | 2 (1 to 6)       | NA                        |
| Madagascar | Cyclist road injuries                           | 34 (22 to 51)    | 32 (21 to 47)    | -5.8% (-13.1% to 1.9%)    |
| Madagascar | Drowning                                        | 0 (0 to 0)       | 0 (0 to 0)       | -13.6% (-21.9% to -4.5%)  |

|            |                                                 |               |               |                           |
|------------|-------------------------------------------------|---------------|---------------|---------------------------|
| Madagascar | Environmental heat and cold exposure            | 0 (0 to 1)    | 0 (0 to 1)    | -3.9% (-10.9% to 3.4%)    |
| Madagascar | Executions and police conflict                  | 0 (0 to 0)    | 0 (0 to 0)    | NA                        |
| Madagascar | Exposure to forces of nature                    | 0 (0 to 0)    | 0 (0 to 0)    | NA                        |
| Madagascar | Falls                                           | 23 (14 to 35) | 25 (16 to 40) | 11.2% (5.5% to 17%)       |
| Madagascar | Fire, heat, and hot substances                  | 0 (0 to 1)    | 0 (0 to 1)    | -16.6% (-22.7% to -10.4%) |
| Madagascar | Foreign body in eyes                            | 0 (0 to 0)    | 0 (0 to 0)    | -0.5% (-1.3% to 0%)       |
| Madagascar | Foreign body in other body part                 | 3 (1 to 7)    | 3 (1 to 8)    | 5.5% (-0.7% to 12%)       |
| Madagascar | Motor vehicle road injuries                     | 48 (32 to 68) | 41 (27 to 58) | -14.2% (-21.1% to -6.4%)  |
| Madagascar | Motorcyclist road injuries                      | 17 (12 to 24) | 15 (10 to 21) | -12.9% (-19.8% to -5.1%)  |
| Madagascar | Non-venomous animal contact                     | 7 (3 to 14)   | 6 (3 to 12)   | -11.6% (-16.4% to -6.6%)  |
| Madagascar | Other exposure to mechanical forces             | 33 (17 to 59) | 30 (15 to 54) | -8.7% (-15.8% to -0.7%)   |
| Madagascar | Other road injuries                             | 2 (1 to 4)    | 2 (1 to 4)    | 5.2% (-4.3% to 16.2%)     |
| Madagascar | Other transport injuries                        | 3 (2 to 4)    | 3 (2 to 4)    | -3.9% (-11.7% to 3.4%)    |
| Madagascar | Other unintentional injuries                    | 3 (2 to 5)    | 3 (2 to 5)    | -10.5% (-17.8% to -2.8%)  |
| Madagascar | Pedestrian road injuries                        | 74 (55 to 96) | 62 (46 to 82) | -16.1% (-21.4% to -9.8%)  |
| Madagascar | Physical violence by firearm                    | 0 (0 to 0)    | 0 (0 to 0)    | 14.2% (1.7% to 28.7%)     |
| Madagascar | Physical violence by other means                | 4 (2 to 6)    | 4 (3 to 6)    | 10.4% (2.9% to 20.3%)     |
| Madagascar | Physical violence by sharp object               | 1 (1 to 2)    | 1 (1 to 2)    | 4.9% (-4.6% to 15.9%)     |
| Madagascar | Poisoning by carbon monoxide                    | 0 (0 to 0)    | 0 (0 to 0)    | 8.1% (-4.7% to 24.5%)     |
| Madagascar | Poisoning by other means                        | 0 (0 to 0)    | 0 (0 to 0)    | -23.5% (-31.2% to -15.6%) |
| Madagascar | Pulmonary aspiration and foreign body in airway | 0 (0 to 0)    | 0 (0 to 0)    | -9% (-20.3% to 1.6%)      |
| Madagascar | Self-harm by firearm                            | 0 (0 to 0)    | 0 (0 to 0)    | 5.6% (-1.7% to 14.8%)     |
| Madagascar | Self-harm by other specified means              | 0 (0 to 0)    | 0 (0 to 0)    | -18.1% (-23.2% to -13.2%) |
| Madagascar | Unintentional firearm injuries                  | 1 (0 to 2)    | 1 (0 to 2)    | -12% (-20.4% to -2%)      |
| Madagascar | Venomous animal contact                         | 1 (0 to 3)    | 1 (0 to 3)    | -18.9% (-27.1% to -12.1%) |
| Malawi     | Adverse effects of medical treatment            | 0 (0 to 0)    | 0 (0 to 0)    | 0% (0% to 0%)             |
| Malawi     | Conflict and terrorism                          | 0 (0 to 0)    | 0 (0 to 0)    | NA                        |
| Malawi     | Cyclist road injuries                           | 30 (19 to 44) | 29 (19 to 41) | -4% (-10.5% to 4.2%)      |
| Malawi     | Drowning                                        | 0 (0 to 0)    | 0 (0 to 0)    | -5.7% (-13.1% to 1.5%)    |
| Malawi     | Environmental heat and cold exposure            | 0 (0 to 1)    | 0 (0 to 1)    | 1.1% (-4.9% to 7.7%)      |
| Malawi     | Executions and police conflict                  | 0 (0 to 0)    | 0 (0 to 0)    | NA                        |
| Malawi     | Exposure to forces of nature                    | 0 (0 to 0)    | 1 (0 to 1)    | NA                        |
| Malawi     | Falls                                           | 24 (15 to 36) | 28 (18 to 43) | 19% (14.7% to 23.4%)      |
| Malawi     | Fire, heat, and hot substances                  | 0 (0 to 1)    | 0 (0 to 1)    | -7.3% (-13% to -1.5%)     |
| Malawi     | Foreign body in eyes                            | 0 (0 to 0)    | 0 (0 to 0)    | -0.7% (-1.8% to -0.1%)    |
| Malawi     | Foreign body in other body part                 | 3 (1 to 7)    | 3 (1 to 7)    | -1.2% (-7.1% to 5%)       |
| Malawi     | Motor vehicle road injuries                     | 34 (22 to 48) | 32 (21 to 45) | -5.8% (-14% to 2.5%)      |
| Malawi     | Motorcyclist road injuries                      | 19 (13 to 26) | 15 (10 to 21) | -18.5% (-24.8% to -11.8%) |
| Malawi     | Non-venomous animal contact                     | 5 (3 to 11)   | 5 (2 to 10)   | -7.5% (-12.5% to -2.5%)   |
| Malawi     | Other exposure to mechanical forces             | 24 (12 to 44) | 24 (12 to 44) | 0.8% (-5.4% to 7.8%)      |
| Malawi     | Other road injuries                             | 1 (1 to 3)    | 1 (1 to 3)    | 0.3% (-8.7% to 10.5%)     |
| Malawi     | Other transport injuries                        | 3 (2 to 4)    | 3 (2 to 4)    | 1.5% (-5.3% to 7.6%)      |
| Malawi     | Other unintentional injuries                    | 2 (1 to 4)    | 2 (1 to 4)    | -1.6% (-10.2% to 6.8%)    |

|          |                                                 |               |                |                           |
|----------|-------------------------------------------------|---------------|----------------|---------------------------|
| Malawi   | Pedestrian road injuries                        | 52 (38 to 68) | 47 (34 to 62)  | -10.3% (-16.4% to -3.2%)  |
| Malawi   | Physical violence by firearm                    | 0 (0 to 0)    | 0 (0 to 0)     | 33.7% (19.8% to 49.7%)    |
| Malawi   | Physical violence by other means                | 3 (2 to 5)    | 3 (2 to 5)     | 9.8% (4.2% to 16.9%)      |
| Malawi   | Physical violence by sharp object               | 1 (0 to 2)    | 1 (1 to 2)     | 7.7% (1% to 15.6%)        |
| Malawi   | Poisoning by carbon monoxide                    | 0 (0 to 0)    | 0 (0 to 0)     | 10.4% (-0.5% to 23.2%)    |
| Malawi   | Poisoning by other means                        | 0 (0 to 0)    | 0 (0 to 0)     | -12.5% (-20.1% to -5%)    |
| Malawi   | Pulmonary aspiration and foreign body in airway | 0 (0 to 0)    | 0 (0 to 0)     | -13.4% (-23.1% to -2.9%)  |
| Malawi   | Self-harm by firearm                            | 0 (0 to 0)    | 0 (0 to 0)     | 10.8% (2.3% to 23.1%)     |
| Malawi   | Self-harm by other specified means              | 0 (0 to 0)    | 0 (0 to 0)     | -12.9% (-18.5% to -7.2%)  |
| Malawi   | Unintentional firearm injuries                  | 1 (0 to 2)    | 1 (0 to 2)     | -7.2% (-15.5% to 2.6%)    |
| Malawi   | Venomous animal contact                         | 1 (0 to 2)    | 1 (0 to 2)     | -5.4% (-14.6% to 3%)      |
| Malaysia | Adverse effects of medical treatment            | 0 (0 to 0)    | 0 (0 to 0)     | 0% (0% to 0%)             |
| Malaysia | Conflict and terrorism                          | 0 (0 to 0)    | 0 (0 to 0)     | NA                        |
| Malaysia | Cyclist road injuries                           | 21 (14 to 30) | 21 (14 to 30)  | 0.3% (-8.8% to 10.2%)     |
| Malaysia | Drowning                                        | 0 (0 to 0)    | 0 (0 to 1)     | 38.2% (25.5% to 52.4%)    |
| Malaysia | Environmental heat and cold exposure            | 2 (1 to 3)    | 2 (1 to 3)     | 3.8% (-0.6% to 8.7%)      |
| Malaysia | Executions and police conflict                  | 0 (0 to 0)    | 0 (0 to 0)     | NA                        |
| Malaysia | Exposure to forces of nature                    | 0 (0 to 0)    | 0 (0 to 0)     | NA                        |
| Malaysia | Falls                                           | 57 (45 to 72) | 80 (64 to 101) | 40.2% (35% to 44.9%)      |
| Malaysia | Fire, heat, and hot substances                  | 1 (1 to 2)    | 1 (1 to 2)     | -10.6% (-15.7% to -6.2%)  |
| Malaysia | Foreign body in eyes                            | 0 (0 to 0)    | 0 (0 to 0)     | 1.6% (1.1% to 2.4%)       |
| Malaysia | Foreign body in other body part                 | 1 (0 to 2)    | 1 (0 to 2)     | 1.4% (-3.5% to 5.8%)      |
| Malaysia | Motor vehicle road injuries                     | 49 (37 to 63) | 53 (40 to 67)  | 8.1% (-2.1% to 19.6%)     |
| Malaysia | Motorcyclist road injuries                      | 58 (46 to 72) | 62 (48 to 77)  | 6.1% (-3.2% to 17.7%)     |
| Malaysia | Non-venomous animal contact                     | 4 (2 to 7)    | 3 (2 to 5)     | -22.2% (-26.5% to -18.1%) |
| Malaysia | Other exposure to mechanical forces             | 19 (11 to 32) | 18 (10 to 29)  | -7.2% (-12.2% to -2.5%)   |
| Malaysia | Other road injuries                             | 2 (1 to 3)    | 2 (1 to 3)     | 0.2% (-10.1% to 10.6%)    |
| Malaysia | Other transport injuries                        | 8 (6 to 10)   | 7 (6 to 9)     | -9.5% (-15.2% to -3.7%)   |
| Malaysia | Other unintentional injuries                    | 11 (7 to 18)  | 10 (6 to 16)   | -15.3% (-22.9% to -9.7%)  |
| Malaysia | Pedestrian road injuries                        | 25 (19 to 32) | 23 (17 to 29)  | -9.2% (-16.3% to -1.5%)   |
| Malaysia | Physical violence by firearm                    | 0 (0 to 0)    | 0 (0 to 0)     | 91% (74.1% to 110%)       |
| Malaysia | Physical violence by other means                | 17 (12 to 24) | 18 (13 to 26)  | 6.4% (-0.3% to 14.2%)     |
| Malaysia | Physical violence by sharp object               | 2 (1 to 3)    | 2 (1 to 3)     | 2.1% (-6.8% to 12.4%)     |
| Malaysia | Poisoning by carbon monoxide                    | 0 (0 to 0)    | 0 (0 to 0)     | 24.8% (13.5% to 37.7%)    |
| Malaysia | Poisoning by other means                        | 0 (0 to 0)    | 0 (0 to 0)     | -21% (-27.5% to -13.9%)   |
| Malaysia | Pulmonary aspiration and foreign body in airway | 0 (0 to 1)    | 0 (0 to 0)     | -17.1% (-24.8% to -8.2%)  |
| Malaysia | Self-harm by firearm                            | 0 (0 to 0)    | 0 (0 to 0)     | 30.9% (10.9% to 56.4%)    |
| Malaysia | Self-harm by other specified means              | 1 (1 to 2)    | 1 (1 to 2)     | 1.4% (-4.6% to 7.8%)      |
| Malaysia | Unintentional firearm injuries                  | 2 (1 to 3)    | 2 (1 to 3)     | -4% (-11% to 3.4%)        |
| Malaysia | Venomous animal contact                         | 1 (0 to 2)    | 1 (0 to 2)     | -25.2% (-31.1% to -19.3%) |
| Maldives | Adverse effects of medical treatment            | 0 (0 to 0)    | 0 (0 to 0)     | 0% (0% to 0%)             |
| Maldives | Conflict and terrorism                          | 0 (0 to 0)    | 0 (0 to 0)     | NA                        |
| Maldives | Cyclist road injuries                           | 19 (13 to 27) | 13 (9 to 19)   | -30.8% (-38.7% to -22.4%) |

|          |                                                 |               |                |                           |
|----------|-------------------------------------------------|---------------|----------------|---------------------------|
| Maldives | Drowning                                        | 1 (0 to 1)    | 1 (0 to 1)     | 23% (8% to 41.2%)         |
| Maldives | Environmental heat and cold exposure            | 1 (1 to 2)    | 1 (1 to 2)     | -4.7% (-9.1% to 0.5%)     |
| Maldives | Executions and police conflict                  | 0 (0 to 0)    | 0 (0 to 0)     | NA                        |
| Maldives | Exposure to forces of nature                    | 0 (0 to 0)    | 0 (0 to 0)     | NA                        |
| Maldives | Falls                                           | 58 (46 to 73) | 88 (70 to 109) | 50.4% (43.6% to 57.3%)    |
| Maldives | Fire, heat, and hot substances                  | 2 (1 to 3)    | 1 (1 to 2)     | -33.8% (-42.6% to -26%)   |
| Maldives | Foreign body in eyes                            | 0 (0 to 0)    | 0 (0 to 0)     | 6.4% (3.4% to 10.3%)      |
| Maldives | Foreign body in other body part                 | 1 (0 to 2)    | 1 (1 to 2)     | 6.2% (0.5% to 12.3%)      |
| Maldives | Motor vehicle road injuries                     | 13 (9 to 18)  | 11 (8 to 16)   | -13.1% (-21.3% to -3.7%)  |
| Maldives | Motorcyclist road injuries                      | 38 (30 to 47) | 27 (21 to 34)  | -27.8% (-34% to -21.7%)   |
| Maldives | Non-venomous animal contact                     | 5 (3 to 9)    | 4 (2 to 6)     | -28.1% (-34.2% to -21.9%) |
| Maldives | Other exposure to mechanical forces             | 23 (13 to 37) | 19 (11 to 31)  | -18.5% (-26.3% to -10.8%) |
| Maldives | Other road injuries                             | 1 (1 to 2)    | 1 (1 to 2)     | 7.9% (-3.2% to 21.8%)     |
| Maldives | Other transport injuries                        | 5 (4 to 7)    | 5 (4 to 7)     | 6.3% (-2% to 14.2%)       |
| Maldives | Other unintentional injuries                    | 12 (8 to 19)  | 9 (6 to 15)    | -25.4% (-33.3% to -16.3%) |
| Maldives | Pedestrian road injuries                        | 10 (7 to 13)  | 8 (6 to 11)    | -16.2% (-25% to -7.5%)    |
| Maldives | Physical violence by firearm                    | 0 (0 to 0)    | 0 (0 to 1)     | 203.5% (167.8% to 246.6%) |
| Maldives | Physical violence by other means                | 14 (10 to 20) | 18 (13 to 26)  | 28.3% (19.2% to 37.3%)    |
| Maldives | Physical violence by sharp object               | 2 (1 to 4)    | 3 (2 to 4)     | 20.4% (8.4% to 33.8%)     |
| Maldives | Poisoning by carbon monoxide                    | 0 (0 to 0)    | 0 (0 to 0)     | 45.2% (30.5% to 62.2%)    |
| Maldives | Poisoning by other means                        | 0 (0 to 0)    | 0 (0 to 0)     | 14% (6.7% to 21.3%)       |
| Maldives | Pulmonary aspiration and foreign body in airway | 0 (0 to 1)    | 0 (0 to 0)     | -38.1% (-45.5% to -29.8%) |
| Maldives | Self-harm by firearm                            | 0 (0 to 0)    | 0 (0 to 0)     | 29.9% (6.4% to 58.3%)     |
| Maldives | Self-harm by other specified means              | 1 (1 to 2)    | 1 (1 to 2)     | -15.3% (-21% to -9.5%)    |
| Maldives | Unintentional firearm injuries                  | 2 (1 to 4)    | 2 (1 to 4)     | -9% (-18.4% to 1.1%)      |
| Maldives | Venomous animal contact                         | 1 (0 to 3)    | 1 (0 to 2)     | -21.8% (-29.3% to -12%)   |
| Mali     | Adverse effects of medical treatment            | 0 (0 to 0)    | 0 (0 to 0)     | 0% (0% to 0%)             |
| Mali     | Conflict and terrorism                          | 32 (10 to 79) | 21 (6 to 53)   | NA                        |
| Mali     | Cyclist road injuries                           | 22 (13 to 32) | 26 (16 to 38)  | 19.5% (10.9% to 28.7%)    |
| Mali     | Drowning                                        | 0 (0 to 0)    | 0 (0 to 0)     | -9.8% (-17.7% to -1.8%)   |
| Mali     | Environmental heat and cold exposure            | 0 (0 to 1)    | 0 (0 to 1)     | 1.4% (-4.3% to 8.1%)      |
| Mali     | Executions and police conflict                  | 0 (0 to 0)    | 1 (0 to 2)     | NA                        |
| Mali     | Exposure to forces of nature                    | 0 (0 to 0)    | 0 (0 to 0)     | NA                        |
| Mali     | Falls                                           | 18 (12 to 27) | 22 (14 to 32)  | 16.6% (12.9% to 21.1%)    |
| Mali     | Fire, heat, and hot substances                  | 0 (0 to 0)    | 0 (0 to 0)     | -9.6% (-15.3% to -3.2%)   |
| Mali     | Foreign body in eyes                            | 0 (0 to 0)    | 0 (0 to 0)     | 0.8% (0.1% to 1.7%)       |
| Mali     | Foreign body in other body part                 | 4 (2 to 8)    | 4 (2 to 8)     | 0.5% (-4.7% to 5.1%)      |
| Mali     | Motor vehicle road injuries                     | 46 (32 to 64) | 49 (34 to 68)  | 7.4% (-0.5% to 16.2%)     |
| Mali     | Motorcyclist road injuries                      | 18 (13 to 26) | 19 (13 to 26)  | 1.4% (-6.2% to 9.4%)      |
| Mali     | Non-venomous animal contact                     | 3 (2 to 7)    | 3 (1 to 6)     | -15% (-20.1% to -10.3%)   |
| Mali     | Other exposure to mechanical forces             | 24 (12 to 44) | 21 (11 to 39)  | -9.7% (-14.9% to -3.9%)   |
| Mali     | Other road injuries                             | 2 (1 to 3)    | 2 (1 to 4)     | 16.9% (5.7% to 28.1%)     |
| Mali     | Other transport injuries                        | 3 (2 to 4)    | 3 (2 to 4)     | -9.2% (-15.8% to -2.1%)   |



|                  |                                                 |                  |                  |                           |
|------------------|-------------------------------------------------|------------------|------------------|---------------------------|
| Mali             | Other unintentional injuries                    | 3 (2 to 5)       | 2 (1 to 4)       | -17.5% (-22% to -12.8%)   |
| Mali             | Pedestrian road injuries                        | 55 (40 to 71)    | 49 (36 to 65)    | -9.8% (-15.5% to -4.1%)   |
| Mali             | Physical violence by firearm                    | 0 (0 to 0)       | 0 (0 to 0)       | 22% (8.9% to 36.8%)       |
| Mali             | Physical violence by other means                | 9 (6 to 14)      | 9 (6 to 14)      | 2.5% (-3% to 8.2%)        |
| Mali             | Physical violence by sharp object               | 3 (2 to 6)       | 3 (2 to 6)       | 1% (-6.2% to 9.1%)        |
| Mali             | Poisoning by carbon monoxide                    | 0 (0 to 0)       | 0 (0 to 0)       | 7.8% (-3.3% to 20.7%)     |
| Mali             | Poisoning by other means                        | 0 (0 to 0)       | 0 (0 to 0)       | -20% (-27.1% to -12.2%)   |
| Mali             | Pulmonary aspiration and foreign body in airway | 0 (0 to 0)       | 0 (0 to 0)       | -16.9% (-24.7% to -8.7%)  |
| Mali             | Self-harm by firearm                            | 0 (0 to 0)       | 0 (0 to 0)       | 13.9% (6.1% to 23.7%)     |
| Mali             | Self-harm by other specified means              | 0 (0 to 0)       | 0 (0 to 0)       | -4.4% (-9.8% to 1%)       |
| Mali             | Unintentional firearm injuries                  | 1 (0 to 2)       | 1 (0 to 2)       | -14.4% (-22.8% to -5.8%)  |
| Mali             | Venomous animal contact                         | 0 (0 to 1)       | 0 (0 to 1)       | -12.1% (-18.9% to -4.6%)  |
| Malta            | Adverse effects of medical treatment            | 0 (0 to 0)       | 0 (0 to 0)       | 0% (0% to 0%)             |
| Malta            | Conflict and terrorism                          | 0 (0 to 0)       | 0 (0 to 0)       | NA                        |
| Malta            | Cyclist road injuries                           | 18 (12 to 24)    | 17 (12 to 22)    | -6.8% (-15.9% to 3.5%)    |
| Malta            | Drowning                                        | 0 (0 to 0)       | 0 (0 to 0)       | 68.6% (55.7% to 83.5%)    |
| Malta            | Environmental heat and cold exposure            | 2 (2 to 3)       | 2 (1 to 3)       | -6.4% (-10.8% to -1.5%)   |
| Malta            | Executions and police conflict                  | 0 (0 to 0)       | 0 (0 to 0)       | NA                        |
| Malta            | Exposure to forces of nature                    | 0 (0 to 0)       | 0 (0 to 0)       | NA                        |
| Malta            | Falls                                           | 250 (194 to 321) | 290 (222 to 380) | 16% (11.7% to 20.3%)      |
| Malta            | Fire, heat, and hot substances                  | 3 (2 to 4)       | 3 (2 to 4)       | -2.3% (-7.4% to 2.9%)     |
| Malta            | Foreign body in eyes                            | 0 (0 to 0)       | 0 (0 to 0)       | 0.9% (0.4% to 1.7%)       |
| Malta            | Foreign body in other body part                 | 2 (1 to 3)       | 2 (1 to 3)       | 1.2% (-3.7% to 6.3%)      |
| Malta            | Motor vehicle road injuries                     | 22 (16 to 29)    | 17 (12 to 22)    | -24.4% (-33.2% to -14.6%) |
| Malta            | Motorcyclist road injuries                      | 8 (6 to 10)      | 8 (6 to 11)      | 3.5% (-11.3% to 22%)      |
| Malta            | Non-venomous animal contact                     | 3 (1 to 4)       | 2 (1 to 4)       | -18.9% (-22.6% to -15.1%) |
| Malta            | Other exposure to mechanical forces             | 49 (30 to 76)    | 46 (28 to 73)    | -5% (-10.8% to 2.4%)      |
| Malta            | Other road injuries                             | 1 (1 to 2)       | 1 (1 to 2)       | -0.5% (-10.6% to 11.4%)   |
| Malta            | Other transport injuries                        | 4 (3 to 5)       | 4 (3 to 5)       | 2.8% (-2% to 7.9%)        |
| Malta            | Other unintentional injuries                    | 28 (18 to 44)    | 22 (14 to 36)    | -20.3% (-25.5% to -15.8%) |
| Malta            | Pedestrian road injuries                        | 9 (6 to 11)      | 7 (5 to 9)       | -25.2% (-35.2% to -15%)   |
| Malta            | Physical violence by firearm                    | 1 (0 to 1)       | 1 (0 to 1)       | 24.1% (13.5% to 35.5%)    |
| Malta            | Physical violence by other means                | 22 (15 to 31)    | 21 (14 to 30)    | -3.8% (-9.4% to 3%)       |
| Malta            | Physical violence by sharp object               | 2 (1 to 3)       | 2 (1 to 3)       | -2.6% (-11% to 6.2%)      |
| Malta            | Poisoning by carbon monoxide                    | 0 (0 to 0)       | 0 (0 to 0)       | 11.3% (2.1% to 21.1%)     |
| Malta            | Poisoning by other means                        | 0 (0 to 0)       | 0 (0 to 0)       | -1.5% (-8.7% to 5.2%)     |
| Malta            | Pulmonary aspiration and foreign body in airway | 1 (0 to 1)       | 1 (0 to 1)       | -13.1% (-20.8% to -5%)    |
| Malta            | Self-harm by firearm                            | 0 (0 to 0)       | 0 (0 to 0)       | 13.4% (1.3% to 26.1%)     |
| Malta            | Self-harm by other specified means              | 1 (1 to 2)       | 1 (1 to 2)       | 5.5% (-0.6% to 11.4%)     |
| Malta            | Unintentional firearm injuries                  | 1 (1 to 2)       | 1 (1 to 2)       | -5.9% (-14.5% to 3.4%)    |
| Malta            | Venomous animal contact                         | 1 (0 to 2)       | 1 (0 to 2)       | -18.8% (-23.6% to -14%)   |
| Marshall Islands | Adverse effects of medical treatment            | 0 (0 to 0)       | 0 (0 to 0)       | 0% (0% to 0%)             |
| Marshall Islands | Conflict and terrorism                          | 0 (0 to 0)       | 0 (0 to 0)       | NA                        |

|                  |                                                 |                |                |                           |
|------------------|-------------------------------------------------|----------------|----------------|---------------------------|
| Marshall Islands | Cyclist road injuries                           | 10 (7 to 14)   | 10 (7 to 15)   | 0.6% (-5.7% to 7.6%)      |
| Marshall Islands | Drowning                                        | 0 (0 to 1)     | 0 (0 to 1)     | 2% (-6.2% to 11.9%)       |
| Marshall Islands | Environmental heat and cold exposure            | 2 (2 to 3)     | 2 (2 to 3)     | -2.3% (-7.3% to 2.7%)     |
| Marshall Islands | Executions and police conflict                  | 0 (0 to 0)     | 0 (0 to 0)     | NA                        |
| Marshall Islands | Exposure to forces of nature                    | 0 (0 to 0)     | 0 (0 to 0)     | NA                        |
| Marshall Islands | Falls                                           | 48 (37 to 61)  | 65 (51 to 85)  | 37.7% (32.7% to 42.8%)    |
| Marshall Islands | Fire, heat, and hot substances                  | 1 (1 to 2)     | 1 (1 to 2)     | -0.2% (-6.1% to 6.3%)     |
| Marshall Islands | Foreign body in eyes                            | 0 (0 to 0)     | 0 (0 to 0)     | 0.6% (-0.1% to 1.7%)      |
| Marshall Islands | Foreign body in other body part                 | 1 (0 to 1)     | 1 (0 to 1)     | -2.4% (-7% to 2.7%)       |
| Marshall Islands | Motor vehicle road injuries                     | 35 (27 to 44)  | 35 (27 to 44)  | -0.2% (-6.8% to 6.3%)     |
| Marshall Islands | Motorcyclist road injuries                      | 14 (10 to 18)  | 14 (10 to 18)  | 0% (-8.2% to 8.2%)        |
| Marshall Islands | Non-venomous animal contact                     | 5 (3 to 8)     | 4 (2 to 7)     | -14.8% (-19.1% to -10.6%) |
| Marshall Islands | Other exposure to mechanical forces             | 14 (8 to 22)   | 11 (7 to 19)   | -15.8% (-20.7% to -10.8%) |
| Marshall Islands | Other road injuries                             | 1 (1 to 2)     | 1 (1 to 2)     | -0.2% (-8.8% to 8.8%)     |
| Marshall Islands | Other transport injuries                        | 8 (6 to 10)    | 8 (6 to 10)    | -4.9% (-9.4% to -0.1%)    |
| Marshall Islands | Other unintentional injuries                    | 7 (4 to 11)    | 7 (4 to 10)    | -4.2% (-8.6% to 0.5%)     |
| Marshall Islands | Pedestrian road injuries                        | 14 (11 to 18)  | 13 (10 to 17)  | -7.3% (-14.5% to 0.7%)    |
| Marshall Islands | Physical violence by firearm                    | 0 (0 to 0)     | 0 (0 to 0)     | -11% (-22.7% to 3.1%)     |
| Marshall Islands | Physical violence by other means                | 36 (25 to 50)  | 33 (23 to 46)  | -8% (-13.7% to -1.2%)     |
| Marshall Islands | Physical violence by sharp object               | 3 (2 to 5)     | 2 (1 to 4)     | -23.2% (-31.3% to -14.5%) |
| Marshall Islands | Poisoning by carbon monoxide                    | 0 (0 to 0)     | 0 (0 to 0)     | 5.6% (-5.2% to 17.1%)     |
| Marshall Islands | Poisoning by other means                        | 0 (0 to 0)     | 0 (0 to 0)     | -16.6% (-23.9% to -8.8%)  |
| Marshall Islands | Pulmonary aspiration and foreign body in airway | 0 (0 to 0)     | 0 (0 to 0)     | 3.3% (-8.9% to 18.1%)     |
| Marshall Islands | Self-harm by firearm                            | 1 (1 to 2)     | 1 (1 to 2)     | -8.9% (-21% to 4.6%)      |
| Marshall Islands | Self-harm by other specified means              | 3 (2 to 4)     | 3 (2 to 4)     | 1.3% (-5.5% to 8.8%)      |
| Marshall Islands | Unintentional firearm injuries                  | 2 (1 to 3)     | 2 (1 to 3)     | -22.7% (-29.1% to -16.3%) |
| Marshall Islands | Venomous animal contact                         | 3 (1 to 6)     | 3 (1 to 5)     | -9.4% (-14.3% to -3.2%)   |
| Mauritania       | Adverse effects of medical treatment            | 0 (0 to 0)     | 0 (0 to 0)     | 0% (0% to 0%)             |
| Mauritania       | Conflict and terrorism                          | 7 (2 to 17)    | 0 (0 to 0)     | NA                        |
| Mauritania       | Cyclist road injuries                           | 28 (17 to 43)  | 27 (17 to 40)  | -4.8% (-12.4% to 3.8%)    |
| Mauritania       | Drowning                                        | 0 (0 to 0)     | 0 (0 to 0)     | 0.8% (-7.8% to 11.3%)     |
| Mauritania       | Environmental heat and cold exposure            | 0 (0 to 1)     | 0 (0 to 1)     | -5.3% (-10.8% to 0.4%)    |
| Mauritania       | Executions and police conflict                  | 0 (0 to 0)     | 0 (0 to 0)     | NA                        |
| Mauritania       | Exposure to forces of nature                    | 0 (0 to 0)     | 0 (0 to 0)     | NA                        |
| Mauritania       | Falls                                           | 17 (11 to 26)  | 20 (13 to 30)  | 16.3% (11.6% to 20.9%)    |
| Mauritania       | Fire, heat, and hot substances                  | 0 (0 to 0)     | 0 (0 to 0)     | -9.5% (-15.2% to -3.8%)   |
| Mauritania       | Foreign body in eyes                            | 0 (0 to 0)     | 0 (0 to 0)     | 0.5% (0% to 1.4%)         |
| Mauritania       | Foreign body in other body part                 | 4 (1 to 8)     | 3 (1 to 7)     | -2.5% (-8.2% to 3.1%)     |
| Mauritania       | Motor vehicle road injuries                     | 89 (62 to 125) | 79 (56 to 109) | -11.2% (-17.4% to -4.2%)  |
| Mauritania       | Motorcyclist road injuries                      | 35 (25 to 48)  | 29 (20 to 40)  | -17.2% (-23.6% to -10.4%) |
| Mauritania       | Non-venomous animal contact                     | 3 (1 to 6)     | 3 (1 to 5)     | -9.1% (-14% to -4.5%)     |
| Mauritania       | Other exposure to mechanical forces             | 27 (13 to 49)  | 24 (12 to 44)  | -11.1% (-16.9% to -4.4%)  |
| Mauritania       | Other road injuries                             | 2 (1 to 5)     | 2 (1 to 4)     | -5.8% (-14.9% to 4.5%)    |

|            |                                                 |               |               |                           |
|------------|-------------------------------------------------|---------------|---------------|---------------------------|
| Mauritania | Other transport injuries                        | 3 (2 to 4)    | 3 (2 to 4)    | -14.2% (-21.7% to -7.7%)  |
| Mauritania | Other unintentional injuries                    | 3 (2 to 5)    | 2 (1 to 4)    | -15.7% (-21.3% to -9.6%)  |
| Mauritania | Pedestrian road injuries                        | 73 (52 to 99) | 59 (42 to 79) | -20.1% (-25.6% to -14.4%) |
| Mauritania | Physical violence by firearm                    | 0 (0 to 0)    | 0 (0 to 0)    | 51.7% (29.3% to 77.3%)    |
| Mauritania | Physical violence by other means                | 8 (6 to 13)   | 8 (6 to 13)   | 1.1% (-4.1% to 6.3%)      |
| Mauritania | Physical violence by sharp object               | 2 (1 to 4)    | 2 (1 to 4)    | 3.3% (-4.6% to 11.6%)     |
| Mauritania | Poisoning by carbon monoxide                    | 0 (0 to 0)    | 0 (0 to 0)    | 20.9% (9.7% to 33.8%)     |
| Mauritania | Poisoning by other means                        | 0 (0 to 0)    | 0 (0 to 0)    | -16.7% (-24% to -9.2%)    |
| Mauritania | Pulmonary aspiration and foreign body in airway | 0 (0 to 0)    | 0 (0 to 0)    | -1.2% (-9.3% to 7.7%)     |
| Mauritania | Self-harm by firearm                            | 0 (0 to 0)    | 0 (0 to 0)    | 2.6% (-4.1% to 10.6%)     |
| Mauritania | Self-harm by other specified means              | 0 (0 to 0)    | 0 (0 to 0)    | -6.9% (-13.1% to -0.7%)   |
| Mauritania | Unintentional firearm injuries                  | 1 (0 to 2)    | 1 (0 to 2)    | -15.2% (-23.5% to -5.8%)  |
| Mauritania | Venomous animal contact                         | 0 (0 to 1)    | 0 (0 to 1)    | -9.1% (-16% to -2.8%)     |
| Mauritius  | Adverse effects of medical treatment            | 0 (0 to 0)    | 0 (0 to 0)    | 0% (0% to 0%)             |
| Mauritius  | Conflict and terrorism                          | 0 (0 to 0)    | 0 (0 to 0)    | NA                        |
| Mauritius  | Cyclist road injuries                           | 8 (5 to 13)   | 9 (5 to 15)   | 11% (-3.6% to 26.8%)      |
| Mauritius  | Drowning                                        | 0 (0 to 0)    | 0 (0 to 0)    | 10.1% (0.9% to 20.3%)     |
| Mauritius  | Environmental heat and cold exposure            | 0 (0 to 0)    | 0 (0 to 0)    | 1.8% (-3.2% to 7%)        |
| Mauritius  | Executions and police conflict                  | 0 (0 to 0)    | 0 (0 to 0)    | NA                        |
| Mauritius  | Exposure to forces of nature                    | 0 (0 to 0)    | 0 (0 to 0)    | NA                        |
| Mauritius  | Falls                                           | 24 (15 to 37) | 39 (25 to 60) | 66.4% (57.8% to 76%)      |
| Mauritius  | Fire, heat, and hot substances                  | 1 (0 to 1)    | 0 (0 to 1)    | -53.3% (-58.3% to -48%)   |
| Mauritius  | Foreign body in eyes                            | 0 (0 to 0)    | 0 (0 to 0)    | 0.3% (0% to 0.7%)         |
| Mauritius  | Foreign body in other body part                 | 1 (0 to 2)    | 1 (0 to 2)    | 2.4% (-1.9% to 7%)        |
| Mauritius  | Motor vehicle road injuries                     | 36 (25 to 51) | 28 (18 to 42) | -23.7% (-33.5% to -13.4%) |
| Mauritius  | Motorcyclist road injuries                      | 38 (28 to 51) | 53 (40 to 67) | 37.6% (21.8% to 57%)      |
| Mauritius  | Non-venomous animal contact                     | 2 (1 to 4)    | 2 (1 to 4)    | -18.9% (-22.7% to -15.1%) |
| Mauritius  | Other exposure to mechanical forces             | 25 (12 to 47) | 26 (12 to 49) | 3.8% (-0.7% to 9%)        |
| Mauritius  | Other road injuries                             | 1 (1 to 3)    | 1 (1 to 3)    | 12.3% (-2.7% to 27.5%)    |
| Mauritius  | Other transport injuries                        | 2 (2 to 4)    | 3 (2 to 5)    | 22.4% (9.7% to 37.2%)     |
| Mauritius  | Other unintentional injuries                    | 3 (2 to 6)    | 3 (2 to 5)    | -4.9% (-12.4% to 2.1%)    |
| Mauritius  | Pedestrian road injuries                        | 21 (14 to 28) | 15 (10 to 21) | -27.8% (-36% to -18.2%)   |
| Mauritius  | Physical violence by firearm                    | 0 (0 to 0)    | 0 (0 to 0)    | 43.2% (28.7% to 60.5%)    |
| Mauritius  | Physical violence by other means                | 15 (10 to 23) | 17 (11 to 25) | 11% (3.4% to 18.8%)       |
| Mauritius  | Physical violence by sharp object               | 2 (1 to 4)    | 3 (1 to 5)    | 26.1% (12.2% to 44.6%)    |
| Mauritius  | Poisoning by carbon monoxide                    | 0 (0 to 0)    | 0 (0 to 0)    | 30.3% (19.4% to 47.6%)    |
| Mauritius  | Poisoning by other means                        | 0 (0 to 0)    | 0 (0 to 0)    | -1.3% (-6.5% to 4.4%)     |
| Mauritius  | Pulmonary aspiration and foreign body in airway | 0 (0 to 0)    | 0 (0 to 0)    | 2.1% (-8.2% to 14.8%)     |
| Mauritius  | Self-harm by firearm                            | 0 (0 to 0)    | 0 (0 to 0)    | -10.1% (-22.9% to 6.7%)   |
| Mauritius  | Self-harm by other specified means              | 0 (0 to 1)    | 0 (0 to 1)    | -22.5% (-27.9% to -16.6%) |
| Mauritius  | Unintentional firearm injuries                  | 1 (0 to 2)    | 1 (0 to 2)    | 5.3% (-2.3% to 13.6%)     |
| Mauritius  | Venomous animal contact                         | 0 (0 to 1)    | 0 (0 to 1)    | -17% (-23.1% to -9.3%)    |
| Mexico     | Adverse effects of medical treatment            | 0 (0 to 0)    | 0 (0 to 0)    | 0% (0% to 0%)             |

|                                  |                                                 |                |                |                           |
|----------------------------------|-------------------------------------------------|----------------|----------------|---------------------------|
| Mexico                           | Conflict and terrorism                          | 0 (0 to 0)     | 0 (0 to 0)     | NA                        |
| Mexico                           | Cyclist road injuries                           | 14 (8 to 22)   | 12 (7 to 18)   | -15.2% (-19.8% to -9.9%)  |
| Mexico                           | Drowning                                        | 0 (0 to 0)     | 0 (0 to 0)     | -43.3% (-47% to -39.7%)   |
| Mexico                           | Environmental heat and cold exposure            | 1 (0 to 2)     | 1 (0 to 1)     | -29.3% (-35.8% to -23.9%) |
| Mexico                           | Executions and police conflict                  | 0 (0 to 0)     | 0 (0 to 0)     | NA                        |
| Mexico                           | Exposure to forces of nature                    | 0 (0 to 1)     | 0 (0 to 0)     | NA                        |
| Mexico                           | Falls                                           | 77 (49 to 116) | 63 (40 to 95)  | -18% (-20.1% to -15.4%)   |
| Mexico                           | Fire, heat, and hot substances                  | 1 (0 to 1)     | 1 (0 to 1)     | -22% (-26.7% to -17.9%)   |
| Mexico                           | Foreign body in eyes                            | 0 (0 to 0)     | 0 (0 to 0)     | -0.3% (-0.8% to 0%)       |
| Mexico                           | Foreign body in other body part                 | 1 (1 to 3)     | 1 (1 to 3)     | -0.1% (-2.4% to 1.6%)     |
| Mexico                           | Motor vehicle road injuries                     | 40 (27 to 57)  | 39 (27 to 54)  | -3.7% (-7.3% to 0.3%)     |
| Mexico                           | Motorcyclist road injuries                      | 14 (9 to 21)   | 14 (10 to 21)  | 1% (-4.7% to 7.9%)        |
| Mexico                           | Non-venomous animal contact                     | 4 (2 to 8)     | 3 (1 to 7)     | -18.7% (-22.6% to -15%)   |
| Mexico                           | Other exposure to mechanical forces             | 77 (38 to 139) | 60 (30 to 111) | -21.7% (-25.8% to -16.8%) |
| Mexico                           | Other road injuries                             | 11 (6 to 19)   | 10 (5 to 17)   | -10.5% (-15.2% to -5.4%)  |
| Mexico                           | Other transport injuries                        | 3 (2 to 4)     | 2 (1 to 4)     | -12% (-16.3% to -8.1%)    |
| Mexico                           | Other unintentional injuries                    | 5 (3 to 9)     | 3 (2 to 6)     | -28.5% (-33.9% to -23.5%) |
| Mexico                           | Pedestrian road injuries                        | 34 (24 to 47)  | 22 (15 to 30)  | -37% (-40.1% to -34%)     |
| Mexico                           | Physical violence by firearm                    | 1 (1 to 2)     | 3 (1 to 5)     | 99.6% (82.6% to 117.9%)   |
| Mexico                           | Physical violence by other means                | 25 (16 to 38)  | 26 (16 to 40)  | 3.8% (-2.1% to 8.7%)      |
| Mexico                           | Physical violence by sharp object               | 6 (3 to 11)    | 7 (3 to 13)    | 21.8% (14.8% to 28.9%)    |
| Mexico                           | Poisoning by carbon monoxide                    | 0 (0 to 0)     | 0 (0 to 0)     | 1.1% (-14.8% to 13.3%)    |
| Mexico                           | Poisoning by other means                        | 0 (0 to 0)     | 0 (0 to 0)     | -11.9% (-19.6% to -5.1%)  |
| Mexico                           | Pulmonary aspiration and foreign body in airway | 0 (0 to 0)     | 0 (0 to 0)     | -44% (-48.6% to -39.7%)   |
| Mexico                           | Self-harm by firearm                            | 0 (0 to 0)     | 0 (0 to 0)     | 36.7% (26% to 45.6%)      |
| Mexico                           | Self-harm by other specified means              | 0 (0 to 0)     | 0 (0 to 0)     | 100.9% (88.3% to 117.5%)  |
| Mexico                           | Unintentional firearm injuries                  | 2 (1 to 5)     | 1 (1 to 3)     | -44.8% (-50% to -39.7%)   |
| Mexico                           | Venomous animal contact                         | 3 (1 to 6)     | 2 (1 to 5)     | -24.2% (-29.5% to -20.1%) |
| Micronesia (Federated States of) | Adverse effects of medical treatment            | 0 (0 to 0)     | 0 (0 to 0)     | 0% (0% to 0%)             |
| Micronesia (Federated States of) | Conflict and terrorism                          | 0 (0 to 0)     | 0 (0 to 0)     | NA                        |
| Micronesia (Federated States of) | Cyclist road injuries                           | 12 (8 to 17)   | 12 (8 to 16)   | -5.3% (-12.4% to 2.3%)    |
| Micronesia (Federated States of) | Drowning                                        | 1 (0 to 1)     | 1 (0 to 1)     | 4% (-6.2% to 16.2%)       |
| Micronesia (Federated States of) | Environmental heat and cold exposure            | 3 (2 to 4)     | 2 (2 to 4)     | -5% (-11.6% to 1.3%)      |
| Micronesia (Federated States of) | Executions and police conflict                  | 0 (0 to 0)     | 0 (0 to 0)     | NA                        |
| Micronesia (Federated States of) | Exposure to forces of nature                    | 0 (0 to 0)     | 0 (0 to 0)     | NA                        |
| Micronesia (Federated States of) | Falls                                           | 47 (37 to 61)  | 73 (57 to 94)  | 54.4% (48.4% to 59.9%)    |
| Micronesia (Federated States of) | Fire, heat, and hot substances                  | 1 (1 to 2)     | 1 (1 to 2)     | -0.6% (-7.6% to 7%)       |
| Micronesia (Federated States of) | Foreign body in eyes                            | 0 (0 to 0)     | 0 (0 to 0)     | -0.8% (-1.5% to -0.3%)    |
| Micronesia (Federated States of) | Foreign body in other body part                 | 1 (0 to 1)     | 1 (0 to 1)     | -2.9% (-7.2% to 1.9%)     |
| Micronesia (Federated States of) | Motor vehicle road injuries                     | 44 (34 to 55)  | 41 (32 to 51)  | -7.6% (-13.8% to -1.2%)   |
| Micronesia (Federated States of) | Motorcyclist road injuries                      | 14 (10 to 18)  | 14 (11 to 19)  | 6.2% (-3.6% to 16%)       |
| Micronesia (Federated States of) | Non-venomous animal contact                     | 5 (3 to 9)     | 4 (2 to 8)     | -13.1% (-17.7% to -8.9%)  |
| Micronesia (Federated States of) | Other exposure to mechanical forces             | 13 (8 to 21)   | 11 (6 to 18)   | -16% (-21.2% to -11%)     |

|                                  |                                                 |                |                 |                           |
|----------------------------------|-------------------------------------------------|----------------|-----------------|---------------------------|
| Micronesia (Federated States of) | Other road injuries                             | 1 (1 to 2)     | 1 (1 to 2)      | -6.9% (-16.1% to 2.4%)    |
| Micronesia (Federated States of) | Other transport injuries                        | 8 (6 to 10)    | 7 (5 to 9)      | -7.7% (-12.6% to -2.3%)   |
| Micronesia (Federated States of) | Other unintentional injuries                    | 7 (5 to 11)    | 6 (4 to 10)     | -8.1% (-12.3% to -3.5%)   |
| Micronesia (Federated States of) | Pedestrian road injuries                        | 9 (7 to 12)    | 8 (6 to 10)     | -11.8% (-19.3% to -4.3%)  |
| Micronesia (Federated States of) | Physical violence by firearm                    | 0 (0 to 0)     | 0 (0 to 0)      | 3.8% (-9.8% to 19.8%)     |
| Micronesia (Federated States of) | Physical violence by other means                | 34 (24 to 48)  | 34 (24 to 48)   | -0.2% (-6.3% to 6.3%)     |
| Micronesia (Federated States of) | Physical violence by sharp object               | 3 (2 to 4)     | 2 (1 to 4)      | -15.7% (-24.3% to -6.4%)  |
| Micronesia (Federated States of) | Poisoning by carbon monoxide                    | 0 (0 to 0)     | 0 (0 to 0)      | 11.7% (0.4% to 24%)       |
| Micronesia (Federated States of) | Poisoning by other means                        | 0 (0 to 0)     | 0 (0 to 0)      | -19.3% (-27% to -11.7%)   |
| Micronesia (Federated States of) | Pulmonary aspiration and foreign body in airway | 0 (0 to 0)     | 0 (0 to 0)      | -6.7% (-17.6% to 5.4%)    |
| Micronesia (Federated States of) | Self-harm by firearm                            | 1 (1 to 2)     | 1 (1 to 2)      | -5% (-18.1% to 9.7%)      |
| Micronesia (Federated States of) | Self-harm by other specified means              | 3 (2 to 5)     | 3 (2 to 5)      | 2.9% (-4.1% to 11.4%)     |
| Micronesia (Federated States of) | Unintentional firearm injuries                  | 2 (1 to 3)     | 2 (1 to 3)      | -26.7% (-33.7% to -20.1%) |
| Micronesia (Federated States of) | Venomous animal contact                         | 3 (1 to 6)     | 3 (1 to 5)      | -7.8% (-12.7% to -2.1%)   |
| Monaco                           | Adverse effects of medical treatment            | 0 (0 to 0)     | 0 (0 to 0)      | 0% (0% to 0%)             |
| Monaco                           | Conflict and terrorism                          | 0 (0 to 0)     | 0 (0 to 0)      | NA                        |
| Monaco                           | Cyclist road injuries                           | 18 (11 to 27)  | 15 (10 to 23)   | -16.4% (-24.4% to -7.5%)  |
| Monaco                           | Drowning                                        | 0 (0 to 0)     | 0 (0 to 0)      | 75.9% (59.5% to 93.1%)    |
| Monaco                           | Environmental heat and cold exposure            | 0 (0 to 1)     | 0 (0 to 1)      | 2% (-3% to 6.8%)          |
| Monaco                           | Executions and police conflict                  | 0 (0 to 0)     | 0 (0 to 0)      | NA                        |
| Monaco                           | Exposure to forces of nature                    | 0 (0 to 0)     | 0 (0 to 0)      | NA                        |
| Monaco                           | Falls                                           | 96 (60 to 150) | 117 (73 to 183) | 22.5% (18.3% to 26.9%)    |
| Monaco                           | Fire, heat, and hot substances                  | 0 (0 to 1)     | 0 (0 to 1)      | 1.4% (-3.2% to 5.6%)      |
| Monaco                           | Foreign body in eyes                            | 0 (0 to 0)     | 0 (0 to 0)      | 0.3% (0% to 1%)           |
| Monaco                           | Foreign body in other body part                 | 2 (1 to 4)     | 2 (1 to 4)      | 0.9% (-3.2% to 5.4%)      |
| Monaco                           | Motor vehicle road injuries                     | 34 (23 to 48)  | 29 (20 to 42)   | -13.4% (-20.7% to -6.1%)  |
| Monaco                           | Motorcyclist road injuries                      | 18 (12 to 25)  | 17 (12 to 23)   | -5% (-13.9% to 4.6%)      |
| Monaco                           | Non-venomous animal contact                     | 1 (0 to 2)     | 1 (0 to 2)      | -9.8% (-13.7% to -4.6%)   |
| Monaco                           | Other exposure to mechanical forces             | 66 (33 to 124) | 67 (33 to 124)  | 1.4% (-3.9% to 6.7%)      |
| Monaco                           | Other road injuries                             | 2 (1 to 4)     | 2 (1 to 3)      | -16.7% (-24.2% to -8.3%)  |
| Monaco                           | Other transport injuries                        | 2 (2 to 3)     | 3 (2 to 4)      | 7.8% (3.2% to 12.9%)      |
| Monaco                           | Other unintentional injuries                    | 7 (4 to 13)    | 7 (4 to 13)     | 1.2% (-3% to 5.4%)        |
| Monaco                           | Pedestrian road injuries                        | 13 (9 to 19)   | 10 (7 to 14)    | -25% (-32.1% to -17.4%)   |
| Monaco                           | Physical violence by firearm                    | 0 (0 to 1)     | 1 (0 to 1)      | 28.5% (18.6% to 39.8%)    |
| Monaco                           | Physical violence by other means                | 12 (7 to 18)   | 12 (8 to 19)    | 5.1% (0.1% to 10.8%)      |
| Monaco                           | Physical violence by sharp object               | 1 (0 to 2)     | 1 (0 to 2)      | 4.5% (-3.5% to 13%)       |
| Monaco                           | Poisoning by carbon monoxide                    | 0 (0 to 0)     | 0 (0 to 0)      | -6.8% (-15.5% to 2.1%)    |
| Monaco                           | Poisoning by other means                        | 0 (0 to 0)     | 0 (0 to 0)      | -34.2% (-40.4% to -28.4%) |
| Monaco                           | Pulmonary aspiration and foreign body in airway | 0 (0 to 1)     | 0 (0 to 0)      | -16% (-23.1% to -8.1%)    |
| Monaco                           | Self-harm by firearm                            | 0 (0 to 0)     | 0 (0 to 0)      | 0.7% (-5.5% to 8.8%)      |
| Monaco                           | Self-harm by other specified means              | 0 (0 to 1)     | 0 (0 to 1)      | -5.9% (-11.4% to 0.3%)    |
| Monaco                           | Unintentional firearm injuries                  | 0 (0 to 1)     | 0 (0 to 1)      | 2.2% (-5% to 10.2%)       |
| Monaco                           | Venomous animal contact                         | 0 (0 to 0)     | 0 (0 to 0)      | -10.9% (-16.7% to -4.7%)  |

|            |                                                 |                  |                  |                           |
|------------|-------------------------------------------------|------------------|------------------|---------------------------|
| Mongolia   | Adverse effects of medical treatment            | 0 (0 to 0)       | 0 (0 to 0)       | 0% (0% to 0%)             |
| Mongolia   | Conflict and terrorism                          | 0 (0 to 0)       | 0 (0 to 0)       | NA                        |
| Mongolia   | Cyclist road injuries                           | 20 (13 to 27)    | 22 (14 to 31)    | 10.4% (0.6% to 19.9%)     |
| Mongolia   | Drowning                                        | 0 (0 to 1)       | 1 (0 to 1)       | 29.8% (15.3% to 47.3%)    |
| Mongolia   | Environmental heat and cold exposure            | 11 (8 to 15)     | 7 (5 to 10)      | -34.4% (-38.1% to -30.7%) |
| Mongolia   | Executions and police conflict                  | 0 (0 to 0)       | 0 (0 to 0)       | NA                        |
| Mongolia   | Exposure to forces of nature                    | 7 (4 to 12)      | 0 (0 to 0)       | NA                        |
| Mongolia   | Falls                                           | 129 (99 to 168)  | 174 (134 to 228) | 34.8% (29.5% to 40.3%)    |
| Mongolia   | Fire, heat, and hot substances                  | 3 (2 to 5)       | 4 (2 to 6)       | 10.8% (3.6% to 17.8%)     |
| Mongolia   | Foreign body in eyes                            | 0 (0 to 0)       | 0 (0 to 0)       | -0.5% (-1.1% to -0.2%)    |
| Mongolia   | Foreign body in other body part                 | 2 (1 to 4)       | 2 (1 to 4)       | 1.5% (-3.8% to 8.5%)      |
| Mongolia   | Motor vehicle road injuries                     | 47 (37 to 60)    | 74 (58 to 94)    | 56.7% (45.9% to 69.9%)    |
| Mongolia   | Motorcyclist road injuries                      | 11 (8 to 14)     | 12 (9 to 16)     | 15.8% (4.3% to 30%)       |
| Mongolia   | Non-venomous animal contact                     | 3 (2 to 5)       | 2 (1 to 4)       | -22.1% (-27.7% to -16.7%) |
| Mongolia   | Other exposure to mechanical forces             | 68 (43 to 107)   | 71 (44 to 109)   | 4.3% (-2.3% to 10.8%)     |
| Mongolia   | Other road injuries                             | 2 (1 to 4)       | 3 (2 to 5)       | 29.9% (16.8% to 46.6%)    |
| Mongolia   | Other transport injuries                        | 5 (4 to 7)       | 5 (4 to 7)       | 0.5% (-5.7% to 6.3%)      |
| Mongolia   | Other unintentional injuries                    | 19 (12 to 31)    | 20 (13 to 33)    | 6.3% (0.9% to 12.4%)      |
| Mongolia   | Pedestrian road injuries                        | 19 (14 to 24)    | 22 (17 to 29)    | 21.1% (10.6% to 33.5%)    |
| Mongolia   | Physical violence by firearm                    | 0 (0 to 0)       | 0 (0 to 0)       | 71.7% (46.5% to 99.4%)    |
| Mongolia   | Physical violence by other means                | 24 (17 to 34)    | 20 (14 to 29)    | -15.1% (-22% to -7.9%)    |
| Mongolia   | Physical violence by sharp object               | 3 (2 to 4)       | 2 (1 to 4)       | -18.8% (-28.1% to -9.1%)  |
| Mongolia   | Poisoning by carbon monoxide                    | 0 (0 to 0)       | 0 (0 to 0)       | -19% (-33% to -1.2%)      |
| Mongolia   | Poisoning by other means                        | 1 (1 to 1)       | 0 (0 to 1)       | -59.3% (-65.5% to -52.6%) |
| Mongolia   | Pulmonary aspiration and foreign body in airway | 1 (1 to 2)       | 1 (1 to 2)       | 0.5% (-6.2% to 8.6%)      |
| Mongolia   | Self-harm by firearm                            | 0 (0 to 0)       | 0 (0 to 1)       | 24% (3.7% to 46.1%)       |
| Mongolia   | Self-harm by other specified means              | 3 (2 to 5)       | 4 (3 to 6)       | 15.2% (8.5% to 22.2%)     |
| Mongolia   | Unintentional firearm injuries                  | 1 (0 to 1)       | 1 (0 to 1)       | -9% (-17.9% to 1.3%)      |
| Mongolia   | Venomous animal contact                         | 3 (1 to 5)       | 2 (1 to 4)       | -19% (-24% to -14.1%)     |
| Montenegro | Adverse effects of medical treatment            | 0 (0 to 0)       | 0 (0 to 0)       | 0% (0% to 0%)             |
| Montenegro | Conflict and terrorism                          | 0 (0 to 0)       | 0 (0 to 0)       | NA                        |
| Montenegro | Cyclist road injuries                           | 68 (50 to 91)    | 65 (47 to 87)    | -4.9% (-12.8% to 2.8%)    |
| Montenegro | Drowning                                        | 0 (0 to 0)       | 0 (0 to 1)       | 40.6% (25.1% to 57.4%)    |
| Montenegro | Environmental heat and cold exposure            | 2 (1 to 3)       | 2 (1 to 2)       | -14.7% (-19.6% to -9.6%)  |
| Montenegro | Executions and police conflict                  | 0 (0 to 0)       | 0 (0 to 0)       | NA                        |
| Montenegro | Exposure to forces of nature                    | 0 (0 to 0)       | 0 (0 to 0)       | NA                        |
| Montenegro | Falls                                           | 270 (211 to 347) | 282 (220 to 365) | 4.3% (-0.5% to 9.7%)      |
| Montenegro | Fire, heat, and hot substances                  | 5 (3 to 8)       | 4 (2 to 7)       | -11.6% (-16.9% to -6.1%)  |
| Montenegro | Foreign body in eyes                            | 0 (0 to 0)       | 0 (0 to 0)       | 0.3% (0.1% to 0.7%)       |
| Montenegro | Foreign body in other body part                 | 2 (1 to 5)       | 2 (1 to 5)       | -1.7% (-6.5% to 3.5%)     |
| Montenegro | Motor vehicle road injuries                     | 86 (66 to 110)   | 94 (72 to 120)   | 9.2% (0.8% to 19.4%)      |
| Montenegro | Motorcyclist road injuries                      | 16 (12 to 21)    | 15 (11 to 20)    | -3.9% (-14.3% to 7.6%)    |
| Montenegro | Non-venomous animal contact                     | 6 (3 to 10)      | 5 (3 to 9)       | -5.6% (-10.5% to -0.9%)   |



|            |                                                 |                 |                 |                           |
|------------|-------------------------------------------------|-----------------|-----------------|---------------------------|
| Montenegro | Other exposure to mechanical forces             | 134 (83 to 213) | 131 (80 to 207) | -2.3% (-7.6% to 2.6%)     |
| Montenegro | Other road injuries                             | 2 (1 to 3)      | 2 (1 to 3)      | 0.1% (-8.8% to 9.4%)      |
| Montenegro | Other transport injuries                        | 7 (5 to 9)      | 6 (4 to 8)      | -11.4% (-17.4% to -5.5%)  |
| Montenegro | Other unintentional injuries                    | 35 (22 to 56)   | 29 (18 to 48)   | -15.5% (-22% to -8.2%)    |
| Montenegro | Pedestrian road injuries                        | 48 (37 to 61)   | 43 (32 to 54)   | -11% (-18% to -3.4%)      |
| Montenegro | Physical violence by firearm                    | 0 (0 to 1)      | 1 (0 to 1)      | 11.3% (-0.2% to 25.5%)    |
| Montenegro | Physical violence by other means                | 41 (30 to 58)   | 33 (23 to 47)   | -19.5% (-25.4% to -13%)   |
| Montenegro | Physical violence by sharp object               | 2 (1 to 4)      | 2 (1 to 3)      | -6.8% (-16.3% to 3%)      |
| Montenegro | Poisoning by carbon monoxide                    | 0 (0 to 0)      | 0 (0 to 0)      | 18.2% (9.6% to 27.8%)     |
| Montenegro | Poisoning by other means                        | 0 (0 to 1)      | 0 (0 to 1)      | 1.8% (-4.9% to 9.2%)      |
| Montenegro | Pulmonary aspiration and foreign body in airway | 1 (1 to 2)      | 1 (1 to 2)      | -19% (-28.6% to -10%)     |
| Montenegro | Self-harm by firearm                            | 1 (1 to 2)      | 1 (1 to 2)      | 9.3% (-1.5% to 22.2%)     |
| Montenegro | Self-harm by other specified means              | 3 (2 to 5)      | 3 (2 to 5)      | -5% (-10.7% to 0.4%)      |
| Montenegro | Unintentional firearm injuries                  | 1 (1 to 2)      | 1 (1 to 2)      | -2.8% (-11.1% to 6.7%)    |
| Montenegro | Venomous animal contact                         | 5 (2 to 9)      | 4 (2 to 9)      | -8.1% (-13.4% to -3.3%)   |
| Morocco    | Adverse effects of medical treatment            | 0 (0 to 0)      | 0 (0 to 0)      | 0% (0% to 0%)             |
| Morocco    | Conflict and terrorism                          | 0 (0 to 0)      | 0 (0 to 0)      | NA                        |
| Morocco    | Cyclist road injuries                           | 16 (11 to 23)   | 16 (11 to 23)   | 2.5% (-7.4% to 12.9%)     |
| Morocco    | Drowning                                        | 0 (0 to 0)      | 0 (0 to 0)      | 44.5% (26.5% to 64.2%)    |
| Morocco    | Environmental heat and cold exposure            | 3 (2 to 4)      | 3 (2 to 4)      | -2% (-6.2% to 2.2%)       |
| Morocco    | Executions and police conflict                  | 0 (0 to 0)      | 0 (0 to 0)      | NA                        |
| Morocco    | Exposure to forces of nature                    | 0 (0 to 0)      | 0 (0 to 0)      | NA                        |
| Morocco    | Falls                                           | 80 (63 to 105)  | 109 (84 to 143) | 35.3% (30% to 41.3%)      |
| Morocco    | Fire, heat, and hot substances                  | 1 (1 to 2)      | 1 (0 to 1)      | -25.9% (-31.5% to -19.7%) |
| Morocco    | Foreign body in eyes                            | 0 (0 to 0)      | 0 (0 to 0)      | 0.4% (0.2% to 0.8%)       |
| Morocco    | Foreign body in other body part                 | 1 (1 to 3)      | 1 (1 to 3)      | -0.9% (-5.5% to 4.4%)     |
| Morocco    | Motor vehicle road injuries                     | 50 (39 to 63)   | 44 (35 to 56)   | -10.8% (-18.5% to -2.3%)  |
| Morocco    | Motorcyclist road injuries                      | 9 (7 to 13)     | 9 (7 to 12)     | -4.3% (-13.9% to 7%)      |
| Morocco    | Non-venomous animal contact                     | 4 (2 to 7)      | 4 (2 to 6)      | -10.8% (-15.5% to -5.8%)  |
| Morocco    | Other exposure to mechanical forces             | 33 (20 to 53)   | 30 (18 to 47)   | -9% (-14.7% to -4%)       |
| Morocco    | Other road injuries                             | 2 (1 to 3)      | 2 (1 to 4)      | 11.4% (0.6% to 23.9%)     |
| Morocco    | Other transport injuries                        | 5 (4 to 7)      | 5 (4 to 7)      | -4.9% (-10.6% to 2.3%)    |
| Morocco    | Other unintentional injuries                    | 25 (16 to 40)   | 19 (13 to 31)   | -22.2% (-26.4% to -17.8%) |
| Morocco    | Pedestrian road injuries                        | 34 (26 to 43)   | 25 (19 to 31)   | -27.7% (-34.1% to -20.9%) |
| Morocco    | Physical violence by firearm                    | 0 (0 to 0)      | 0 (0 to 1)      | 173.4% (140.1% to 214.1%) |
| Morocco    | Physical violence by other means                | 8 (6 to 12)     | 9 (6 to 13)     | 9.1% (2.6% to 16.8%)      |
| Morocco    | Physical violence by sharp object               | 1 (1 to 2)      | 1 (1 to 2)      | 9.1% (0.2% to 18.8%)      |
| Morocco    | Poisoning by carbon monoxide                    | 0 (0 to 0)      | 0 (0 to 0)      | 33.7% (17.4% to 50.3%)    |
| Morocco    | Poisoning by other means                        | 0 (0 to 0)      | 0 (0 to 0)      | -22.7% (-30.5% to -14.8%) |
| Morocco    | Pulmonary aspiration and foreign body in airway | 0 (0 to 1)      | 0 (0 to 1)      | -21.4% (-30.6% to -12.8%) |
| Morocco    | Self-harm by firearm                            | 0 (0 to 0)      | 0 (0 to 0)      | 28.9% (14.4% to 45.2%)    |
| Morocco    | Self-harm by other specified means              | 1 (1 to 2)      | 1 (1 to 2)      | 4.2% (-0.8% to 9.7%)      |
| Morocco    | Unintentional firearm injuries                  | 3 (2 to 4)      | 2 (1 to 4)      | -18.6% (-26.7% to -10.9%) |

|            |                                                 |                |                 |                           |
|------------|-------------------------------------------------|----------------|-----------------|---------------------------|
| Morocco    | Venomous animal contact                         | 2 (1 to 5)     | 2 (1 to 4)      | -8.7% (-14.5% to -1.9%)   |
| Mozambique | Adverse effects of medical treatment            | 0 (0 to 0)     | 0 (0 to 0)      | 0% (0% to 0%)             |
| Mozambique | Conflict and terrorism                          | 70 (19 to 200) | 2 (1 to 6)      | NA                        |
| Mozambique | Cyclist road injuries                           | 39 (25 to 57)  | 47 (31 to 69)   | 21.5% (11.5% to 31.6%)    |
| Mozambique | Drowning                                        | 0 (0 to 0)     | 0 (0 to 0)      | -8.3% (-14.7% to -1.6%)   |
| Mozambique | Environmental heat and cold exposure            | 0 (0 to 1)     | 0 (0 to 1)      | 4% (-2.8% to 11.3%)       |
| Mozambique | Executions and police conflict                  | 0 (0 to 0)     | 0 (0 to 0)      | NA                        |
| Mozambique | Exposure to forces of nature                    | 0 (0 to 0)     | 5 (2 to 10)     | NA                        |
| Mozambique | Falls                                           | 26 (17 to 41)  | 34 (22 to 54)   | 30% (24.7% to 35.4%)      |
| Mozambique | Fire, heat, and hot substances                  | 0 (0 to 1)     | 0 (0 to 1)      | -5.4% (-10.4% to -0.6%)   |
| Mozambique | Foreign body in eyes                            | 0 (0 to 0)     | 0 (0 to 0)      | -0.5% (-1.4% to -0.1%)    |
| Mozambique | Foreign body in other body part                 | 3 (1 to 7)     | 3 (1 to 7)      | -4.2% (-9.6% to 2.7%)     |
| Mozambique | Motor vehicle road injuries                     | 34 (22 to 49)  | 43 (28 to 62)   | 26.2% (14.2% to 38.9%)    |
| Mozambique | Motorcyclist road injuries                      | 24 (16 to 33)  | 29 (21 to 41)   | 23.7% (14.1% to 34.8%)    |
| Mozambique | Non-venomous animal contact                     | 7 (3 to 15)    | 6 (3 to 12)     | -16.8% (-21.1% to -12%)   |
| Mozambique | Other exposure to mechanical forces             | 25 (12 to 46)  | 25 (12 to 46)   | -0.3% (-7% to 6.2%)       |
| Mozambique | Other road injuries                             | 2 (1 to 4)     | 2 (1 to 4)      | 7.1% (-1.2% to 16.6%)     |
| Mozambique | Other transport injuries                        | 3 (2 to 5)     | 3 (2 to 5)      | -2.6% (-8.5% to 4.4%)     |
| Mozambique | Other unintentional injuries                    | 3 (2 to 4)     | 2 (1 to 4)      | -8.4% (-15.1% to -2.2%)   |
| Mozambique | Pedestrian road injuries                        | 89 (66 to 116) | 103 (76 to 134) | 15.1% (8.1% to 22.8%)     |
| Mozambique | Physical violence by firearm                    | 0 (0 to 0)     | 0 (0 to 0)      | 66.3% (51.6% to 84.3%)    |
| Mozambique | Physical violence by other means                | 5 (3 to 7)     | 7 (4 to 10)     | 47% (38.2% to 56.6%)      |
| Mozambique | Physical violence by sharp object               | 1 (1 to 2)     | 2 (1 to 3)      | 36.6% (25.7% to 49%)      |
| Mozambique | Poisoning by carbon monoxide                    | 0 (0 to 0)     | 0 (0 to 0)      | 20.3% (6.4% to 37%)       |
| Mozambique | Poisoning by other means                        | 0 (0 to 0)     | 0 (0 to 0)      | -11.3% (-19.9% to -3.2%)  |
| Mozambique | Pulmonary aspiration and foreign body in airway | 0 (0 to 0)     | 0 (0 to 0)      | -15.8% (-26.7% to -4.3%)  |
| Mozambique | Self-harm by firearm                            | 0 (0 to 0)     | 0 (0 to 0)      | 91.3% (74.4% to 113.7%)   |
| Mozambique | Self-harm by other specified means              | 0 (0 to 0)     | 0 (0 to 0)      | 44.9% (35.5% to 55%)      |
| Mozambique | Unintentional firearm injuries                  | 1 (0 to 2)     | 1 (0 to 2)      | -15.8% (-23.8% to -5.9%)  |
| Mozambique | Venomous animal contact                         | 1 (0 to 3)     | 1 (0 to 3)      | -15.5% (-22.3% to -7.6%)  |
| Myanmar    | Adverse effects of medical treatment            | 0 (0 to 0)     | 0 (0 to 0)      | 0% (0% to 0%)             |
| Myanmar    | Conflict and terrorism                          | 9 (4 to 20)    | 7 (3 to 15)     | NA                        |
| Myanmar    | Cyclist road injuries                           | 17 (12 to 25)  | 13 (9 to 19)    | -23.3% (-30% to -15.7%)   |
| Myanmar    | Drowning                                        | 1 (0 to 1)     | 0 (0 to 1)      | -34% (-40% to -27.5%)     |
| Myanmar    | Environmental heat and cold exposure            | 1 (1 to 2)     | 2 (1 to 2)      | 3.7% (-2.4% to 8.8%)      |
| Myanmar    | Executions and police conflict                  | 0 (0 to 0)     | 1 (0 to 1)      | NA                        |
| Myanmar    | Exposure to forces of nature                    | 0 (0 to 0)     | 0 (0 to 0)      | NA                        |
| Myanmar    | Falls                                           | 87 (69 to 111) | 115 (91 to 144) | 31.6% (26.3% to 36.9%)    |
| Myanmar    | Fire, heat, and hot substances                  | 1 (1 to 2)     | 1 (1 to 2)      | -3.9% (-11.5% to 2.2%)    |
| Myanmar    | Foreign body in eyes                            | 0 (0 to 0)     | 0 (0 to 0)      | -1.5% (-2.3% to -0.9%)    |
| Myanmar    | Foreign body in other body part                 | 1 (0 to 2)     | 1 (0 to 2)      | -6% (-11.5% to -1.1%)     |
| Myanmar    | Motor vehicle road injuries                     | 24 (18 to 32)  | 17 (12 to 23)   | -30.2% (-36.5% to -23.4%) |
| Myanmar    | Motorcyclist road injuries                      | 42 (33 to 53)  | 34 (26 to 43)   | -18.8% (-25.8% to -10.8%) |

|         |                                                 |               |               |                           |
|---------|-------------------------------------------------|---------------|---------------|---------------------------|
| Myanmar | Non-venomous animal contact                     | 8 (5 to 14)   | 5 (3 to 8)    | -44.6% (-48.5% to -40.7%) |
| Myanmar | Other exposure to mechanical forces             | 24 (15 to 39) | 20 (12 to 32) | -17.2% (-22.8% to -11.7%) |
| Myanmar | Other road injuries                             | 1 (1 to 2)    | 1 (0 to 1)    | -15.1% (-23.7% to -5.1%)  |
| Myanmar | Other transport injuries                        | 5 (4 to 6)    | 4 (3 to 6)    | -11.6% (-21.4% to -2.1%)  |
| Myanmar | Other unintentional injuries                    | 14 (9 to 23)  | 10 (6 to 17)  | -26.6% (-32.3% to -20.5%) |
| Myanmar | Pedestrian road injuries                        | 18 (13 to 23) | 10 (8 to 13)  | -44.5% (-49.1% to -39.5%) |
| Myanmar | Physical violence by firearm                    | 0 (0 to 0)    | 0 (0 to 0)    | -11.1% (-28% to 7.5%)     |
| Myanmar | Physical violence by other means                | 16 (11 to 22) | 10 (7 to 15)  | -35.7% (-42.6% to -28.9%) |
| Myanmar | Physical violence by sharp object               | 3 (2 to 5)    | 2 (1 to 3)    | -45.6% (-53.9% to -38.1%) |
| Myanmar | Poisoning by carbon monoxide                    | 0 (0 to 0)    | 0 (0 to 0)    | -0.2% (-12.8% to 15.6%)   |
| Myanmar | Poisoning by other means                        | 0 (0 to 0)    | 0 (0 to 0)    | -46.6% (-53% to -40.4%)   |
| Myanmar | Pulmonary aspiration and foreign body in airway | 0 (0 to 0)    | 0 (0 to 0)    | -41.6% (-47.8% to -34.6%) |
| Myanmar | Self-harm by firearm                            | 0 (0 to 0)    | 0 (0 to 0)    | -10.1% (-26.2% to 8.6%)   |
| Myanmar | Self-harm by other specified means              | 1 (1 to 2)    | 1 (1 to 1)    | -26% (-30.5% to -21.4%)   |
| Myanmar | Unintentional firearm injuries                  | 3 (2 to 4)    | 2 (1 to 3)    | -29.4% (-37.7% to -21.4%) |
| Myanmar | Venomous animal contact                         | 3 (1 to 6)    | 1 (0 to 3)    | -54.8% (-60.8% to -49.3%) |
| Namibia | Adverse effects of medical treatment            | 0 (0 to 0)    | 0 (0 to 0)    | 0% (0% to 0%)             |
| Namibia | Conflict and terrorism                          | 0 (0 to 0)    | 0 (0 to 0)    | NA                        |
| Namibia | Cyclist road injuries                           | 11 (7 to 17)  | 15 (9 to 24)  | 41% (30.7% to 52.7%)      |
| Namibia | Drowning                                        | 0 (0 to 0)    | 0 (0 to 0)    | -1.4% (-10.9% to 12.7%)   |
| Namibia | Environmental heat and cold exposure            | 0 (0 to 1)    | 0 (0 to 1)    | -11.5% (-17.6% to -5.7%)  |
| Namibia | Executions and police conflict                  | 0 (0 to 0)    | 0 (0 to 0)    | NA                        |
| Namibia | Exposure to forces of nature                    | 0 (0 to 0)    | 0 (0 to 0)    | NA                        |
| Namibia | Falls                                           | 18 (12 to 28) | 23 (15 to 35) | 25.9% (21.2% to 31%)      |
| Namibia | Fire, heat, and hot substances                  | 0 (0 to 0)    | 0 (0 to 0)    | -16.7% (-22.3% to -11.1%) |
| Namibia | Foreign body in eyes                            | 0 (0 to 0)    | 0 (0 to 0)    | -0.7% (-1.5% to -0.1%)    |
| Namibia | Foreign body in other body part                 | 4 (2 to 9)    | 4 (2 to 9)    | -3.1% (-8.5% to 2.8%)     |
| Namibia | Motor vehicle road injuries                     | 41 (28 to 57) | 44 (31 to 61) | 9% (1.2% to 17.8%)        |
| Namibia | Motorcyclist road injuries                      | 9 (6 to 12)   | 11 (7 to 15)  | 23.8% (12.7% to 35.5%)    |
| Namibia | Non-venomous animal contact                     | 3 (2 to 7)    | 3 (1 to 6)    | -19% (-23.9% to -13.8%)   |
| Namibia | Other exposure to mechanical forces             | 32 (16 to 58) | 27 (14 to 49) | -14.5% (-20.3% to -8.3%)  |
| Namibia | Other road injuries                             | 1 (1 to 3)    | 2 (1 to 3)    | 34.8% (22.3% to 49.9%)    |
| Namibia | Other transport injuries                        | 3 (2 to 5)    | 3 (2 to 5)    | -0.8% (-8.8% to 6.4%)     |
| Namibia | Other unintentional injuries                    | 3 (2 to 5)    | 2 (1 to 4)    | -13.6% (-19.5% to -8.4%)  |
| Namibia | Pedestrian road injuries                        | 50 (36 to 64) | 49 (36 to 64) | -1.5% (-7.8% to 5.4%)     |
| Namibia | Physical violence by firearm                    | 0 (0 to 1)    | 0 (0 to 1)    | 15.3% (-0.1% to 36.7%)    |
| Namibia | Physical violence by other means                | 17 (11 to 27) | 18 (11 to 27) | 1.5% (-5.4% to 8.4%)      |
| Namibia | Physical violence by sharp object               | 5 (3 to 10)   | 6 (3 to 10)   | 5% (-4.8% to 15.2%)       |
| Namibia | Poisoning by carbon monoxide                    | 0 (0 to 0)    | 0 (0 to 0)    | 23.1% (10.3% to 36.2%)    |
| Namibia | Poisoning by other means                        | 0 (0 to 0)    | 0 (0 to 0)    | -18.4% (-26.9% to -9%)    |
| Namibia | Pulmonary aspiration and foreign body in airway | 0 (0 to 0)    | 0 (0 to 0)    | -3.4% (-11.4% to 4.8%)    |
| Namibia | Self-harm by firearm                            | 0 (0 to 0)    | 0 (0 to 0)    | 48.1% (35.7% to 63.9%)    |
| Namibia | Self-harm by other specified means              | 0 (0 to 0)    | 0 (0 to 0)    | 26% (16.8% to 34.7%)      |

|         |                                                 |                 |                  |                           |
|---------|-------------------------------------------------|-----------------|------------------|---------------------------|
| Namibia | Unintentional firearm injuries                  | 1 (0 to 1)      | 0 (0 to 1)       | -13% (-22.9% to -0.3%)    |
| Namibia | Venomous animal contact                         | 0 (0 to 1)      | 0 (0 to 1)       | -20.9% (-30.3% to -11.6%) |
| Nauru   | Adverse effects of medical treatment            | 0 (0 to 0)      | 0 (0 to 0)       | 0% (0% to 0%)             |
| Nauru   | Conflict and terrorism                          | 0 (0 to 0)      | 0 (0 to 0)       | NA                        |
| Nauru   | Cyclist road injuries                           | 10 (6 to 15)    | 10 (6 to 15)     | 2.9% (-3% to 10.3%)       |
| Nauru   | Drowning                                        | 0 (0 to 0)      | 0 (0 to 0)       | 23.3% (13.2% to 34.1%)    |
| Nauru   | Environmental heat and cold exposure            | 0 (0 to 1)      | 0 (0 to 1)       | -4.2% (-9.3% to 1%)       |
| Nauru   | Executions and police conflict                  | 0 (0 to 0)      | 0 (0 to 0)       | NA                        |
| Nauru   | Exposure to forces of nature                    | 0 (0 to 0)      | 0 (0 to 0)       | NA                        |
| Nauru   | Falls                                           | 27 (17 to 42)   | 38 (24 to 59)    | 43.5% (38.4% to 48.7%)    |
| Nauru   | Fire, heat, and hot substances                  | 0 (0 to 0)      | 0 (0 to 0)       | -2.2% (-7% to 3%)         |
| Nauru   | Foreign body in eyes                            | 0 (0 to 0)      | 0 (0 to 0)       | -2% (-4% to -0.6%)        |
| Nauru   | Foreign body in other body part                 | 1 (0 to 2)      | 1 (0 to 2)       | -2.1% (-6.9% to 3.2%)     |
| Nauru   | Motor vehicle road injuries                     | 40 (28 to 56)   | 36 (25 to 51)    | -10.5% (-16.2% to -4.7%)  |
| Nauru   | Motorcyclist road injuries                      | 31 (23 to 42)   | 30 (22 to 41)    | -3% (-9.7% to 3.7%)       |
| Nauru   | Non-venomous animal contact                     | 2 (1 to 4)      | 2 (1 to 4)       | 3.7% (-1.1% to 8.5%)      |
| Nauru   | Other exposure to mechanical forces             | 20 (10 to 38)   | 18 (9 to 33)     | -13.2% (-17.4% to -8.6%)  |
| Nauru   | Other road injuries                             | 2 (1 to 4)      | 2 (1 to 4)       | -1.1% (-8.8% to 7.6%)     |
| Nauru   | Other transport injuries                        | 3 (2 to 5)      | 3 (2 to 5)       | -3.3% (-8.3% to 1.5%)     |
| Nauru   | Other unintentional injuries                    | 2 (1 to 3)      | 2 (1 to 3)       | 1.7% (-3% to 6.8%)        |
| Nauru   | Pedestrian road injuries                        | 20 (14 to 28)   | 20 (14 to 29)    | 1.2% (-6.1% to 9.1%)      |
| Nauru   | Physical violence by firearm                    | 0 (0 to 0)      | 0 (0 to 0)       | 2.3% (-8.3% to 13.3%)     |
| Nauru   | Physical violence by other means                | 31 (21 to 48)   | 31 (20 to 47)    | -1.7% (-6.8% to 3.5%)     |
| Nauru   | Physical violence by sharp object               | 2 (1 to 5)      | 2 (1 to 4)       | -14.5% (-22.3% to -6.1%)  |
| Nauru   | Poisoning by carbon monoxide                    | 0 (0 to 0)      | 0 (0 to 0)       | 5% (-4.9% to 16.2%)       |
| Nauru   | Poisoning by other means                        | 0 (0 to 0)      | 0 (0 to 0)       | -18.3% (-25.5% to -10.8%) |
| Nauru   | Pulmonary aspiration and foreign body in airway | 0 (0 to 0)      | 0 (0 to 0)       | 5.8% (-5.4% to 17.3%)     |
| Nauru   | Self-harm by firearm                            | 0 (0 to 0)      | 0 (0 to 0)       | -2.2% (-9.7% to 6%)       |
| Nauru   | Self-harm by other specified means              | 0 (0 to 1)      | 0 (0 to 1)       | 0.8% (-6.2% to 8.1%)      |
| Nauru   | Unintentional firearm injuries                  | 1 (0 to 2)      | 1 (0 to 2)       | -15.2% (-23.8% to -7.4%)  |
| Nauru   | Venomous animal contact                         | 1 (0 to 1)      | 1 (0 to 2)       | 5.9% (-1.3% to 14.5%)     |
| Nepal   | Adverse effects of medical treatment            | 0 (0 to 0)      | 0 (0 to 0)       | 0% (0% to 0%)             |
| Nepal   | Conflict and terrorism                          | 0 (0 to 1)      | 0 (0 to 1)       | NA                        |
| Nepal   | Cyclist road injuries                           | 58 (44 to 74)   | 57 (43 to 75)    | -1.2% (-8.6% to 6%)       |
| Nepal   | Drowning                                        | 0 (0 to 1)      | 0 (0 to 1)       | -10.7% (-20.6% to -0.3%)  |
| Nepal   | Environmental heat and cold exposure            | 3 (2 to 4)      | 3 (2 to 4)       | -11% (-16.6% to -5%)      |
| Nepal   | Executions and police conflict                  | 0 (0 to 0)      | 0 (0 to 0)       | NA                        |
| Nepal   | Exposure to forces of nature                    | 1 (1 to 1)      | 0 (0 to 0)       | NA                        |
| Nepal   | Falls                                           | 119 (93 to 154) | 143 (113 to 185) | 20.5% (16.6% to 24.9%)    |
| Nepal   | Fire, heat, and hot substances                  | 0 (0 to 1)      | 1 (0 to 1)       | 10.8% (3.4% to 19.4%)     |
| Nepal   | Foreign body in eyes                            | 0 (0 to 0)      | 0 (0 to 0)       | -1.9% (-3.4% to -0.9%)    |
| Nepal   | Foreign body in other body part                 | 1 (1 to 2)      | 1 (1 to 2)       | -5.6% (-10.3% to -0.1%)   |
| Nepal   | Motor vehicle road injuries                     | 24 (18 to 31)   | 28 (21 to 37)    | 16.5% (6.3% to 26%)       |

|             |                                                 |                  |                  |                           |
|-------------|-------------------------------------------------|------------------|------------------|---------------------------|
| Nepal       | Motorcyclist road injuries                      | 27 (21 to 36)    | 32 (25 to 42)    | 19.5% (9.4% to 29.7%)     |
| Nepal       | Non-venomous animal contact                     | 14 (8 to 25)     | 12 (7 to 21)     | -14.6% (-20.1% to -8.6%)  |
| Nepal       | Other exposure to mechanical forces             | 10 (6 to 17)     | 11 (6 to 18)     | 3.3% (-2.6% to 8.8%)      |
| Nepal       | Other road injuries                             | 1 (1 to 2)       | 1 (1 to 2)       | 4.8% (-3.6% to 13.9%)     |
| Nepal       | Other transport injuries                        | 6 (5 to 8)       | 6 (5 to 8)       | 3.1% (-3.7% to 10.6%)     |
| Nepal       | Other unintentional injuries                    | 16 (10 to 25)    | 13 (8 to 21)     | -18.6% (-22.9% to -14.1%) |
| Nepal       | Pedestrian road injuries                        | 23 (18 to 30)    | 23 (17 to 29)    | -1.4% (-8.6% to 5.9%)     |
| Nepal       | Physical violence by firearm                    | 0 (0 to 0)       | 0 (0 to 0)       | 61.3% (37% to 90.9%)      |
| Nepal       | Physical violence by other means                | 23 (17 to 32)    | 28 (20 to 39)    | 20.5% (13.8% to 27.6%)    |
| Nepal       | Physical violence by sharp object               | 1 (0 to 1)       | 1 (1 to 2)       | 8.2% (-0.8% to 18.1%)     |
| Nepal       | Poisoning by carbon monoxide                    | 0 (0 to 0)       | 0 (0 to 0)       | -7.6% (-19.7% to 5%)      |
| Nepal       | Poisoning by other means                        | 0 (0 to 0)       | 0 (0 to 0)       | -33% (-39.9% to -25.2%)   |
| Nepal       | Pulmonary aspiration and foreign body in airway | 1 (0 to 1)       | 0 (0 to 1)       | -26% (-32.9% to -18.7%)   |
| Nepal       | Self-harm by firearm                            | 0 (0 to 1)       | 0 (0 to 1)       | 14.5% (-1.3% to 33.6%)    |
| Nepal       | Self-harm by other specified means              | 2 (1 to 3)       | 2 (1 to 3)       | 4% (-2.7% to 10.9%)       |
| Nepal       | Unintentional firearm injuries                  | 1 (0 to 1)       | 1 (0 to 1)       | -10.8% (-17.8% to -3.3%)  |
| Nepal       | Venomous animal contact                         | 6 (2 to 13)      | 6 (2 to 12)      | -7% (-15.2% to 1.7%)      |
| Netherlands | Adverse effects of medical treatment            | 0 (0 to 0)       | 0 (0 to 0)       | 0% (0% to 0%)             |
| Netherlands | Conflict and terrorism                          | 0 (0 to 0)       | 0 (0 to 0)       | NA                        |
| Netherlands | Cyclist road injuries                           | 37 (28 to 48)    | 20 (15 to 27)    | -45.3% (-53.4% to -36.4%) |
| Netherlands | Drowning                                        | 0 (0 to 0)       | 0 (0 to 0)       | 57.7% (41.4% to 75.7%)    |
| Netherlands | Environmental heat and cold exposure            | 2 (1 to 3)       | 2 (1 to 3)       | -3.1% (-7.6% to 1.3%)     |
| Netherlands | Executions and police conflict                  | 0 (0 to 0)       | 0 (0 to 0)       | NA                        |
| Netherlands | Exposure to forces of nature                    | 0 (0 to 0)       | 0 (0 to 0)       | NA                        |
| Netherlands | Falls                                           | 190 (150 to 240) | 270 (215 to 337) | 41.5% (35.4% to 48.3%)    |
| Netherlands | Fire, heat, and hot substances                  | 2 (1 to 4)       | 2 (1 to 4)       | -0.6% (-5.1% to 3.8%)     |
| Netherlands | Foreign body in eyes                            | 0 (0 to 0)       | 0 (0 to 0)       | 0.3% (0% to 1%)           |
| Netherlands | Foreign body in other body part                 | 2 (1 to 4)       | 2 (1 to 4)       | 1.6% (-2.6% to 8.7%)      |
| Netherlands | Motor vehicle road injuries                     | 26 (20 to 34)    | 18 (13 to 23)    | -33.3% (-43.5% to -21.5%) |
| Netherlands | Motorcyclist road injuries                      | 13 (9 to 16)     | 8 (6 to 11)      | -34.3% (-46.8% to -19.8%) |
| Netherlands | Non-venomous animal contact                     | 2 (1 to 3)       | 2 (1 to 3)       | -11.2% (-15.2% to -6.5%)  |
| Netherlands | Other exposure to mechanical forces             | 43 (26 to 69)    | 42 (25 to 67)    | -2.6% (-8.7% to 3.1%)     |
| Netherlands | Other road injuries                             | 1 (1 to 2)       | 1 (1 to 2)       | -4.1% (-19% to 13.2%)     |
| Netherlands | Other transport injuries                        | 4 (3 to 5)       | 4 (3 to 5)       | 3.6% (-1.6% to 9%)        |
| Netherlands | Other unintentional injuries                    | 22 (14 to 36)    | 21 (14 to 35)    | -3.6% (-8.2% to 1.7%)     |
| Netherlands | Pedestrian road injuries                        | 6 (5 to 8)       | 6 (4 to 8)       | -5.1% (-18.8% to 11.4%)   |
| Netherlands | Physical violence by firearm                    | 1 (0 to 1)       | 1 (0 to 1)       | 15.5% (4.4% to 27.6%)     |
| Netherlands | Physical violence by other means                | 13 (9 to 19)     | 12 (8 to 17)     | -11.8% (-18.5% to -4.7%)  |
| Netherlands | Physical violence by sharp object               | 2 (1 to 3)       | 1 (1 to 2)       | -26% (-35% to -17.3%)     |
| Netherlands | Poisoning by carbon monoxide                    | 0 (0 to 0)       | 0 (0 to 0)       | 10.3% (1.9% to 19%)       |
| Netherlands | Poisoning by other means                        | 0 (0 to 0)       | 0 (0 to 0)       | -5.3% (-11.4% to 1.1%)    |
| Netherlands | Pulmonary aspiration and foreign body in airway | 1 (1 to 2)       | 1 (1 to 2)       | -9% (-16.7% to -2.3%)     |
| Netherlands | Self-harm by firearm                            | 0 (0 to 0)       | 0 (0 to 0)       | 15.8% (2.5% to 32.2%)     |

|             |                                                 |                  |                  |                           |
|-------------|-------------------------------------------------|------------------|------------------|---------------------------|
| Netherlands | Self-harm by other specified means              | 3 (2 to 5)       | 3 (2 to 4)       | -8.1% (-12.3% to -3.1%)   |
| Netherlands | Unintentional firearm injuries                  | 1 (1 to 2)       | 1 (1 to 2)       | 5.4% (-3% to 14.4%)       |
| Netherlands | Venomous animal contact                         | 1 (0 to 2)       | 1 (0 to 2)       | -10.9% (-16.1% to -5.5%)  |
| New Zealand | Adverse effects of medical treatment            | 0 (0 to 0)       | 0 (0 to 0)       | 0% (0% to 0%)             |
| New Zealand | Conflict and terrorism                          | 0 (0 to 0)       | 0 (0 to 0)       | NA                        |
| New Zealand | Cyclist road injuries                           | 14 (10 to 21)    | 11 (8 to 15)     | -24.6% (-34.4% to -13.2%) |
| New Zealand | Drowning                                        | 0 (0 to 1)       | 0 (0 to 0)       | -34.8% (-40.6% to -28.8%) |
| New Zealand | Environmental heat and cold exposure            | 3 (2 to 4)       | 2 (1 to 2)       | -38.7% (-46.1% to -29.8%) |
| New Zealand | Executions and police conflict                  | 0 (0 to 0)       | 0 (0 to 0)       | NA                        |
| New Zealand | Exposure to forces of nature                    | 0 (0 to 0)       | 0 (0 to 0)       | NA                        |
| New Zealand | Falls                                           | 307 (236 to 397) | 372 (291 to 482) | 21.2% (14% to 29.4%)      |
| New Zealand | Fire, heat, and hot substances                  | 4 (3 to 7)       | 4 (2 to 6)       | -14.2% (-19.9% to -5.4%)  |
| New Zealand | Foreign body in eyes                            | 0 (0 to 0)       | 0 (0 to 0)       | -0.1% (-0.6% to 0.3%)     |
| New Zealand | Foreign body in other body part                 | 7 (3 to 13)      | 7 (3 to 13)      | -1.5% (-10.7% to 9%)      |
| New Zealand | Motor vehicle road injuries                     | 64 (47 to 84)    | 56 (44 to 69)    | -12.6% (-22.3% to 0.8%)   |
| New Zealand | Motorcyclist road injuries                      | 19 (13 to 26)    | 14 (11 to 18)    | -26.8% (-39.2% to -12.9%) |
| New Zealand | Non-venomous animal contact                     | 17 (9 to 29)     | 14 (8 to 23)     | -17.4% (-31.3% to -1.5%)  |
| New Zealand | Other exposure to mechanical forces             | 220 (137 to 352) | 200 (124 to 316) | -9.4% (-16.2% to -0.8%)   |
| New Zealand | Other road injuries                             | 5 (3 to 8)       | 3 (2 to 5)       | -33.5% (-42.7% to -22.3%) |
| New Zealand | Other transport injuries                        | 10 (7 to 13)     | 7 (6 to 9)       | -24.5% (-36.1% to -12%)   |
| New Zealand | Other unintentional injuries                    | 71 (45 to 115)   | 66 (43 to 104)   | -7.1% (-15% to 1.5%)      |
| New Zealand | Pedestrian road injuries                        | 12 (8 to 16)     | 10 (7 to 12)     | -16.4% (-26.9% to -4.3%)  |
| New Zealand | Physical violence by firearm                    | 0 (0 to 1)       | 0 (0 to 1)       | -15.3% (-26.4% to -3%)    |
| New Zealand | Physical violence by other means                | 43 (29 to 63)    | 43 (30 to 60)    | -0.7% (-8.9% to 9.8%)     |
| New Zealand | Physical violence by sharp object               | 3 (2 to 5)       | 2 (1 to 3)       | -37.5% (-45.5% to -27%)   |
| New Zealand | Poisoning by carbon monoxide                    | 0 (0 to 0)       | 0 (0 to 0)       | -9.2% (-24.6% to 12.1%)   |
| New Zealand | Poisoning by other means                        | 0 (0 to 0)       | 0 (0 to 0)       | -22.7% (-30.4% to -13%)   |
| New Zealand | Pulmonary aspiration and foreign body in airway | 2 (1 to 4)       | 3 (2 to 4)       | 11.5% (0.5% to 25.9%)     |
| New Zealand | Self-harm by firearm                            | 0 (0 to 0)       | 0 (0 to 0)       | -76.2% (-80.5% to -70.8%) |
| New Zealand | Self-harm by other specified means              | 5 (3 to 8)       | 3 (2 to 6)       | -26.1% (-31.8% to -21%)   |
| New Zealand | Unintentional firearm injuries                  | 1 (1 to 2)       | 1 (0 to 1)       | -40% (-53.5% to -21.8%)   |
| New Zealand | Venomous animal contact                         | 4 (1 to 9)       | 3 (1 to 7)       | -22.7% (-39.3% to -1.8%)  |
| Nicaragua   | Adverse effects of medical treatment            | 0 (0 to 0)       | 0 (0 to 0)       | 0% (0% to 0%)             |
| Nicaragua   | Conflict and terrorism                          | 10 (4 to 22)     | 0 (0 to 0)       | NA                        |
| Nicaragua   | Cyclist road injuries                           | 21 (15 to 30)    | 18 (12 to 25)    | -16% (-25% to -6.4%)      |
| Nicaragua   | Drowning                                        | 0 (0 to 0)       | 0 (0 to 0)       | 23.6% (9.1% to 42.8%)     |
| Nicaragua   | Environmental heat and cold exposure            | 3 (2 to 4)       | 3 (2 to 4)       | 2.8% (-1.2% to 7.4%)      |
| Nicaragua   | Executions and police conflict                  | 0 (0 to 0)       | 0 (0 to 0)       | NA                        |
| Nicaragua   | Exposure to forces of nature                    | 0 (0 to 0)       | 0 (0 to 0)       | NA                        |
| Nicaragua   | Falls                                           | 72 (55 to 95)    | 91 (69 to 119)   | 26.1% (20.4% to 31.1%)    |
| Nicaragua   | Fire, heat, and hot substances                  | 3 (2 to 6)       | 3 (2 to 5)       | -2.8% (-10.2% to 4.9%)    |
| Nicaragua   | Foreign body in eyes                            | 0 (0 to 0)       | 0 (0 to 0)       | 0.2% (-0.2% to 0.7%)      |
| Nicaragua   | Foreign body in other body part                 | 1 (1 to 2)       | 1 (1 to 2)       | -1.5% (-7.2% to 3.4%)     |



|           |                                                 |               |               |                           |
|-----------|-------------------------------------------------|---------------|---------------|---------------------------|
| Nicaragua | Motor vehicle road injuries                     | 34 (26 to 43) | 29 (22 to 37) | -14.7% (-22.4% to -6.2%)  |
| Nicaragua | Motorcyclist road injuries                      | 8 (6 to 11)   | 13 (10 to 17) | 57.9% (41.3% to 76.5%)    |
| Nicaragua | Non-venomous animal contact                     | 6 (3 to 11)   | 6 (3 to 10)   | -9.2% (-14.8% to -2.9%)   |
| Nicaragua | Other exposure to mechanical forces             | 41 (24 to 67) | 37 (21 to 61) | -10% (-18.3% to -1.8%)    |
| Nicaragua | Other road injuries                             | 6 (3 to 9)    | 5 (3 to 7)    | -14% (-23.6% to -4.4%)    |
| Nicaragua | Other transport injuries                        | 4 (3 to 5)    | 4 (3 to 5)    | 0.9% (-4.9% to 7.1%)      |
| Nicaragua | Other unintentional injuries                    | 14 (9 to 22)  | 10 (6 to 17)  | -27.5% (-34.5% to -20.2%) |
| Nicaragua | Pedestrian road injuries                        | 28 (22 to 35) | 17 (13 to 22) | -37.9% (-43.7% to -31.7%) |
| Nicaragua | Physical violence by firearm                    | 1 (1 to 1)    | 1 (1 to 2)    | 65.4% (41.8% to 90.1%)    |
| Nicaragua | Physical violence by other means                | 16 (11 to 23) | 13 (9 to 20)  | -15.1% (-22.9% to -6.2%)  |
| Nicaragua | Physical violence by sharp object               | 7 (5 to 10)   | 6 (4 to 8)    | -19.2% (-29.4% to -8.1%)  |
| Nicaragua | Poisoning by carbon monoxide                    | 0 (0 to 0)    | 0 (0 to 0)    | 33.6% (18.7% to 50.9%)    |
| Nicaragua | Poisoning by other means                        | 0 (0 to 0)    | 0 (0 to 0)    | -9.7% (-17.3% to -1.1%)   |
| Nicaragua | Pulmonary aspiration and foreign body in airway | 1 (0 to 1)    | 0 (0 to 1)    | -34.7% (-43.3% to -25.5%) |
| Nicaragua | Self-harm by firearm                            | 0 (0 to 0)    | 0 (0 to 0)    | 16.3% (0% to 34.1%)       |
| Nicaragua | Self-harm by other specified means              | 1 (0 to 1)    | 1 (0 to 1)    | 6.1% (-1.5% to 14.3%)     |
| Nicaragua | Unintentional firearm injuries                  | 4 (2 to 6)    | 3 (1 to 4)    | -29.6% (-39.9% to -19.8%) |
| Nicaragua | Venomous animal contact                         | 8 (4 to 15)   | 8 (4 to 14)   | -8.4% (-13.5% to -2.5%)   |
| Niger     | Adverse effects of medical treatment            | 0 (0 to 0)    | 0 (0 to 0)    | 0% (0% to 0%)             |
| Niger     | Conflict and terrorism                          | 12 (4 to 30)  | 8 (2 to 20)   | NA                        |
| Niger     | Cyclist road injuries                           | 24 (15 to 36) | 27 (17 to 39) | 13.9% (6.5% to 21.8%)     |
| Niger     | Drowning                                        | 0 (0 to 0)    | 0 (0 to 0)    | -11.2% (-18.7% to -3.9%)  |
| Niger     | Environmental heat and cold exposure            | 0 (0 to 1)    | 0 (0 to 1)    | -0.2% (-6.4% to 5.9%)     |
| Niger     | Executions and police conflict                  | 0 (0 to 0)    | 0 (0 to 0)    | NA                        |
| Niger     | Exposure to forces of nature                    | 0 (0 to 0)    | 0 (0 to 0)    | NA                        |
| Niger     | Falls                                           | 19 (13 to 29) | 22 (14 to 33) | 12.6% (8.1% to 16.9%)     |
| Niger     | Fire, heat, and hot substances                  | 0 (0 to 0)    | 0 (0 to 0)    | -12% (-18.1% to -6%)      |
| Niger     | Foreign body in eyes                            | 0 (0 to 0)    | 0 (0 to 0)    | -0.6% (-1.6% to -0.1%)    |
| Niger     | Foreign body in other body part                 | 4 (2 to 8)    | 4 (2 to 8)    | -4.2% (-9.1% to 1.1%)     |
| Niger     | Motor vehicle road injuries                     | 43 (30 to 60) | 45 (31 to 62) | 5.2% (-1.5% to 13%)       |
| Niger     | Motorcyclist road injuries                      | 20 (14 to 28) | 19 (13 to 26) | -7.5% (-14.2% to -0.1%)   |
| Niger     | Non-venomous animal contact                     | 3 (2 to 7)    | 3 (1 to 6)    | -7.9% (-13.2% to -3.3%)   |
| Niger     | Other exposure to mechanical forces             | 25 (12 to 45) | 22 (11 to 40) | -11.3% (-16.4% to -5.1%)  |
| Niger     | Other road injuries                             | 2 (1 to 4)    | 2 (1 to 4)    | 13.2% (4% to 23.5%)       |
| Niger     | Other transport injuries                        | 4 (3 to 5)    | 3 (2 to 4)    | -16.5% (-22.5% to -11.3%) |
| Niger     | Other unintentional injuries                    | 3 (2 to 5)    | 2 (1 to 4)    | -13.9% (-18.7% to -9.5%)  |
| Niger     | Pedestrian road injuries                        | 46 (33 to 60) | 46 (33 to 60) | -0.3% (-6.8% to 6.8%)     |
| Niger     | Physical violence by firearm                    | 0 (0 to 0)    | 0 (0 to 0)    | 10.9% (-0.3% to 24.7%)    |
| Niger     | Physical violence by other means                | 9 (6 to 14)   | 9 (6 to 13)   | -4.5% (-9.5% to 0.6%)     |
| Niger     | Physical violence by sharp object               | 3 (2 to 6)    | 3 (2 to 5)    | -6.3% (-12.6% to 0.4%)    |
| Niger     | Poisoning by carbon monoxide                    | 0 (0 to 0)    | 0 (0 to 0)    | 9.8% (-2.8% to 24.2%)     |
| Niger     | Poisoning by other means                        | 0 (0 to 0)    | 0 (0 to 0)    | -19.7% (-27.3% to -10.7%) |
| Niger     | Pulmonary aspiration and foreign body in airway | 0 (0 to 0)    | 0 (0 to 0)    | -16.1% (-25.1% to -6.4%)  |

|         |                                                 |               |               |                           |
|---------|-------------------------------------------------|---------------|---------------|---------------------------|
| Niger   | Self-harm by firearm                            | 0 (0 to 0)    | 0 (0 to 0)    | 19.6% (12.8% to 28.1%)    |
| Niger   | Self-harm by other specified means              | 0 (0 to 0)    | 0 (0 to 0)    | 7% (1.7% to 12.5%)        |
| Niger   | Unintentional firearm injuries                  | 1 (0 to 2)    | 1 (0 to 2)    | -14.3% (-21.6% to -6.4%)  |
| Niger   | Venomous animal contact                         | 0 (0 to 1)    | 0 (0 to 1)    | -4.4% (-11.9% to 3.4%)    |
| Nigeria | Adverse effects of medical treatment            | 0 (0 to 0)    | 0 (0 to 0)    | 0% (0% to 0%)             |
| Nigeria | Conflict and terrorism                          | 0 (0 to 1)    | 6 (2 to 17)   | NA                        |
| Nigeria | Cyclist road injuries                           | 22 (14 to 33) | 26 (16 to 38) | 14.8% (12.1% to 17.7%)    |
| Nigeria | Drowning                                        | 0 (0 to 0)    | 0 (0 to 0)    | -11.1% (-16.3% to -6.1%)  |
| Nigeria | Environmental heat and cold exposure            | 0 (0 to 1)    | 0 (0 to 1)    | -0.9% (-3.7% to 1.6%)     |
| Nigeria | Executions and police conflict                  | 0 (0 to 0)    | 0 (0 to 1)    | NA                        |
| Nigeria | Exposure to forces of nature                    | 0 (0 to 0)    | 0 (0 to 0)    | NA                        |
| Nigeria | Falls                                           | 20 (13 to 30) | 21 (13 to 31) | 3.3% (2.3% to 4.4%)       |
| Nigeria | Fire, heat, and hot substances                  | 0 (0 to 0)    | 0 (0 to 0)    | -14.4% (-17.5% to -11.6%) |
| Nigeria | Foreign body in eyes                            | 0 (0 to 0)    | 0 (0 to 0)    | -1.8% (-4.6% to -0.1%)    |
| Nigeria | Foreign body in other body part                 | 4 (2 to 9)    | 4 (2 to 8)    | -1.7% (-2.8% to -0.4%)    |
| Nigeria | Motor vehicle road injuries                     | 39 (26 to 55) | 43 (29 to 60) | 11.1% (8.8% to 13.7%)     |
| Nigeria | Motorcyclist road injuries                      | 19 (13 to 27) | 21 (14 to 30) | 10.5% (7.9% to 13.1%)     |
| Nigeria | Non-venomous animal contact                     | 3 (1 to 6)    | 2 (1 to 5)    | -18.7% (-22.1% to -15.7%) |
| Nigeria | Other exposure to mechanical forces             | 27 (13 to 49) | 22 (11 to 41) | -17.6% (-20.8% to -14.4%) |
| Nigeria | Other road injuries                             | 2 (1 to 4)    | 2 (1 to 5)    | 14.7% (11.7% to 17.9%)    |
| Nigeria | Other transport injuries                        | 3 (2 to 4)    | 3 (2 to 4)    | -2.6% (-5.3% to 0%)       |
| Nigeria | Other unintentional injuries                    | 3 (2 to 5)    | 2 (1 to 4)    | -13.6% (-18.7% to -9.2%)  |
| Nigeria | Pedestrian road injuries                        | 41 (30 to 54) | 44 (32 to 60) | 8.9% (6.7% to 11.1%)      |
| Nigeria | Physical violence by firearm                    | 0 (0 to 1)    | 0 (0 to 1)    | 6.5% (2% to 10.9%)        |
| Nigeria | Physical violence by other means                | 9 (6 to 14)   | 9 (6 to 14)   | -0.2% (-2.2% to 1.6%)     |
| Nigeria | Physical violence by sharp object               | 3 (2 to 6)    | 3 (1 to 5)    | -4% (-6.5% to -1.9%)      |
| Nigeria | Poisoning by carbon monoxide                    | 0 (0 to 0)    | 0 (0 to 0)    | -11% (-14.9% to -7%)      |
| Nigeria | Poisoning by other means                        | 0 (0 to 0)    | 0 (0 to 0)    | -21.3% (-25.5% to -16.9%) |
| Nigeria | Pulmonary aspiration and foreign body in airway | 0 (0 to 0)    | 0 (0 to 0)    | -14.4% (-17.3% to -11.8%) |
| Nigeria | Self-harm by firearm                            | 0 (0 to 0)    | 0 (0 to 0)    | 3.8% (0.9% to 6.7%)       |
| Nigeria | Self-harm by other specified means              | 0 (0 to 0)    | 0 (0 to 0)    | -2.9% (-5.2% to -0.7%)    |
| Nigeria | Unintentional firearm injuries                  | 1 (0 to 2)    | 1 (0 to 2)    | -26.4% (-31.6% to -21.5%) |
| Nigeria | Venomous animal contact                         | 0 (0 to 1)    | 0 (0 to 1)    | -17.5% (-22.4% to -13.8%) |
| Niue    | Adverse effects of medical treatment            | 0 (0 to 0)    | 0 (0 to 0)    | 0% (0% to 0%)             |
| Niue    | Conflict and terrorism                          | 0 (0 to 0)    | 0 (0 to 0)    | NA                        |
| Niue    | Cyclist road injuries                           | 9 (5 to 14)   | 9 (5 to 14)   | 3.5% (-3.8% to 11.4%)     |
| Niue    | Drowning                                        | 0 (0 to 0)    | 0 (0 to 0)    | 37.8% (25.7% to 51.7%)    |
| Niue    | Environmental heat and cold exposure            | 0 (0 to 1)    | 0 (0 to 1)    | 0.5% (-4.8% to 5.9%)      |
| Niue    | Executions and police conflict                  | 0 (0 to 0)    | 0 (0 to 0)    | NA                        |
| Niue    | Exposure to forces of nature                    | 0 (0 to 0)    | 0 (0 to 0)    | NA                        |
| Niue    | Falls                                           | 27 (17 to 42) | 41 (26 to 64) | 52.4% (47% to 58.8%)      |
| Niue    | Fire, heat, and hot substances                  | 0 (0 to 0)    | 0 (0 to 0)    | 6.1% (1.2% to 11.3%)      |
| Niue    | Foreign body in eyes                            | 0 (0 to 0)    | 0 (0 to 0)    | 0.4% (-0.1% to 1.2%)      |

|                 |                                                 |                  |                  |                           |
|-----------------|-------------------------------------------------|------------------|------------------|---------------------------|
| Niue            | Foreign body in other body part                 | 1 (0 to 2)       | 1 (0 to 2)       | -1.3% (-5.1% to 3.5%)     |
| Niue            | Motor vehicle road injuries                     | 31 (22 to 45)    | 27 (18 to 39)    | -14.1% (-20.4% to -7.7%)  |
| Niue            | Motorcyclist road injuries                      | 25 (18 to 33)    | 24 (17 to 32)    | -4% (-10.5% to 3.1%)      |
| Niue            | Non-venomous animal contact                     | 3 (1 to 5)       | 2 (1 to 4)       | -14.8% (-18.7% to -10.8%) |
| Niue            | Other exposure to mechanical forces             | 20 (10 to 37)    | 18 (9 to 33)     | -9.5% (-14.4% to -4.8%)   |
| Niue            | Other road injuries                             | 2 (1 to 4)       | 2 (1 to 4)       | 2.6% (-6.5% to 12%)       |
| Niue            | Other transport injuries                        | 3 (2 to 5)       | 3 (2 to 4)       | -7.2% (-13.7% to -1.7%)   |
| Niue            | Other unintentional injuries                    | 2 (1 to 4)       | 2 (1 to 3)       | -3.6% (-8.8% to 1%)       |
| Niue            | Pedestrian road injuries                        | 16 (11 to 23)    | 15 (10 to 21)    | -10% (-16.7% to -2.8%)    |
| Niue            | Physical violence by firearm                    | 0 (0 to 0)       | 0 (0 to 0)       | 9.1% (-2.3% to 21.2%)     |
| Niue            | Physical violence by other means                | 31 (21 to 47)    | 27 (18 to 41)    | -12.6% (-18.5% to -7.1%)  |
| Niue            | Physical violence by sharp object               | 3 (1 to 5)       | 2 (1 to 4)       | -27.3% (-36.3% to -19.1%) |
| Niue            | Poisoning by carbon monoxide                    | 0 (0 to 0)       | 0 (0 to 0)       | 11.4% (1.8% to 23.2%)     |
| Niue            | Poisoning by other means                        | 0 (0 to 0)       | 0 (0 to 0)       | -10.2% (-17.3% to -2.5%)  |
| Niue            | Pulmonary aspiration and foreign body in airway | 0 (0 to 0)       | 0 (0 to 0)       | -7.2% (-17.7% to 2.7%)    |
| Niue            | Self-harm by firearm                            | 0 (0 to 0)       | 0 (0 to 0)       | -12.4% (-20% to -4.6%)    |
| Niue            | Self-harm by other specified means              | 0 (0 to 1)       | 0 (0 to 0)       | -7.2% (-14.2% to 0.4%)    |
| Niue            | Unintentional firearm injuries                  | 1 (0 to 2)       | 1 (0 to 2)       | -10.8% (-18.8% to -2.2%)  |
| Niue            | Venomous animal contact                         | 1 (0 to 2)       | 1 (0 to 2)       | -11.1% (-17.4% to -4.4%)  |
| North Macedonia | Adverse effects of medical treatment            | 0 (0 to 0)       | 0 (0 to 0)       | 0% (0% to 0%)             |
| North Macedonia | Conflict and terrorism                          | 0 (0 to 0)       | 0 (0 to 0)       | NA                        |
| North Macedonia | Cyclist road injuries                           | 59 (42 to 78)    | 57 (40 to 76)    | -3.3% (-11.7% to 4.5%)    |
| North Macedonia | Drowning                                        | 0 (0 to 0)       | 0 (0 to 1)       | 178.1% (135.7% to 230.8%) |
| North Macedonia | Environmental heat and cold exposure            | 2 (1 to 2)       | 2 (1 to 2)       | 2.4% (-1.6% to 6.7%)      |
| North Macedonia | Executions and police conflict                  | 0 (0 to 0)       | 0 (0 to 0)       | NA                        |
| North Macedonia | Exposure to forces of nature                    | 0 (0 to 0)       | 0 (0 to 0)       | NA                        |
| North Macedonia | Falls                                           | 136 (102 to 184) | 225 (172 to 297) | 65.3% (56.5% to 75.6%)    |
| North Macedonia | Fire, heat, and hot substances                  | 3 (2 to 5)       | 3 (2 to 6)       | 5.7% (1.4% to 10%)        |
| North Macedonia | Foreign body in eyes                            | 0 (0 to 0)       | 0 (0 to 0)       | 0.5% (0.2% to 0.9%)       |
| North Macedonia | Foreign body in other body part                 | 2 (1 to 5)       | 2 (1 to 5)       | 1.6% (-4.4% to 7.6%)      |
| North Macedonia | Motor vehicle road injuries                     | 93 (72 to 118)   | 95 (74 to 122)   | 2.7% (-6% to 11%)         |
| North Macedonia | Motorcyclist road injuries                      | 9 (6 to 12)      | 11 (8 to 15)     | 24.5% (9.1% to 40.8%)     |
| North Macedonia | Non-venomous animal contact                     | 6 (3 to 11)      | 6 (3 to 10)      | -9.1% (-13.9% to -3.3%)   |
| North Macedonia | Other exposure to mechanical forces             | 130 (81 to 206)  | 137 (85 to 216)  | 4.8% (-0.3% to 9.8%)      |
| North Macedonia | Other road injuries                             | 1 (1 to 2)       | 1 (1 to 2)       | -8% (-17.5% to 0.9%)      |
| North Macedonia | Other transport injuries                        | 6 (4 to 8)       | 6 (4 to 8)       | 5.4% (-0.2% to 10.6%)     |
| North Macedonia | Other unintentional injuries                    | 90 (59 to 141)   | 34 (22 to 55)    | -62.4% (-66.5% to -57.6%) |
| North Macedonia | Pedestrian road injuries                        | 35 (27 to 45)    | 27 (21 to 36)    | -21.9% (-29.1% to -14.3%) |
| North Macedonia | Physical violence by firearm                    | 0 (0 to 0)       | 0 (0 to 1)       | 100.4% (73.9% to 127.6%)  |
| North Macedonia | Physical violence by other means                | 34 (25 to 48)    | 26 (18 to 37)    | -24.4% (-32.5% to -16.6%) |
| North Macedonia | Physical violence by sharp object               | 2 (1 to 3)       | 2 (1 to 3)       | 1.8% (-11.2% to 16.3%)    |
| North Macedonia | Poisoning by carbon monoxide                    | 0 (0 to 0)       | 0 (0 to 0)       | 35.7% (25.5% to 47.7%)    |
| North Macedonia | Poisoning by other means                        | 0 (0 to 1)       | 0 (0 to 1)       | 4.9% (-1.6% to 11.1%)     |

|                          |                                                 |                  |                  |                           |
|--------------------------|-------------------------------------------------|------------------|------------------|---------------------------|
| North Macedonia          | Pulmonary aspiration and foreign body in airway | 1 (0 to 2)       | 1 (0 to 1)       | -10.4% (-16.8% to -2.6%)  |
| North Macedonia          | Self-harm by firearm                            | 0 (0 to 1)       | 0 (0 to 1)       | 29% (14.9% to 45.1%)      |
| North Macedonia          | Self-harm by other specified means              | 2 (1 to 3)       | 2 (1 to 3)       | -8.8% (-13.5% to -3.1%)   |
| North Macedonia          | Unintentional firearm injuries                  | 1 (1 to 2)       | 1 (1 to 2)       | -8% (-16.6% to 0.4%)      |
| North Macedonia          | Venomous animal contact                         | 5 (2 to 10)      | 5 (2 to 9)       | -10.8% (-15.5% to -5.2%)  |
| Northern Mariana Islands | Adverse effects of medical treatment            | 0 (0 to 0)       | 0 (0 to 0)       | 0% (0% to 0%)             |
| Northern Mariana Islands | Conflict and terrorism                          | 0 (0 to 0)       | 0 (0 to 0)       | NA                        |
| Northern Mariana Islands | Cyclist road injuries                           | 8 (5 to 12)      | 8 (5 to 12)      | 1.3% (-5.9% to 9.1%)      |
| Northern Mariana Islands | Drowning                                        | 0 (0 to 0)       | 0 (0 to 1)       | 24.4% (15.1% to 35.9%)    |
| Northern Mariana Islands | Environmental heat and cold exposure            | 0 (0 to 1)       | 0 (0 to 1)       | 3.9% (-3.5% to 9.8%)      |
| Northern Mariana Islands | Executions and police conflict                  | 0 (0 to 0)       | 0 (0 to 0)       | NA                        |
| Northern Mariana Islands | Exposure to forces of nature                    | 0 (0 to 0)       | 0 (0 to 0)       | NA                        |
| Northern Mariana Islands | Falls                                           | 41 (26 to 60)    | 55 (35 to 83)    | 36% (30.4% to 41.9%)      |
| Northern Mariana Islands | Fire, heat, and hot substances                  | 0 (0 to 0)       | 0 (0 to 0)       | 6.9% (0.6% to 12.5%)      |
| Northern Mariana Islands | Foreign body in eyes                            | 0 (0 to 0)       | 0 (0 to 0)       | -2.4% (-5% to -0.6%)      |
| Northern Mariana Islands | Foreign body in other body part                 | 1 (0 to 2)       | 1 (0 to 2)       | 0% (-4.7% to 5%)          |
| Northern Mariana Islands | Motor vehicle road injuries                     | 45 (32 to 63)    | 26 (18 to 37)    | -42.8% (-47.6% to -37.9%) |
| Northern Mariana Islands | Motorcyclist road injuries                      | 27 (19 to 38)    | 23 (17 to 31)    | -12.9% (-19.7% to -5.5%)  |
| Northern Mariana Islands | Non-venomous animal contact                     | 2 (1 to 3)       | 2 (1 to 4)       | 9.3% (4.5% to 14.7%)      |
| Northern Mariana Islands | Other exposure to mechanical forces             | 31 (15 to 56)    | 21 (10 to 39)    | -32.2% (-38.2% to -25.5%) |
| Northern Mariana Islands | Other road injuries                             | 2 (1 to 4)       | 2 (1 to 4)       | -4.6% (-13.7% to 5.6%)    |
| Northern Mariana Islands | Other transport injuries                        | 5 (3 to 7)       | 3 (2 to 5)       | -31.5% (-38.7% to -23.8%) |
| Northern Mariana Islands | Other unintentional injuries                    | 3 (2 to 5)       | 3 (2 to 5)       | -15.6% (-21% to -10.1%)   |
| Northern Mariana Islands | Pedestrian road injuries                        | 32 (23 to 44)    | 20 (14 to 28)    | -37.7% (-43% to -32.4%)   |
| Northern Mariana Islands | Physical violence by firearm                    | 1 (0 to 1)       | 0 (0 to 1)       | -42.2% (-51.7% to -31.5%) |
| Northern Mariana Islands | Physical violence by other means                | 40 (27 to 60)    | 36 (24 to 54)    | -11.1% (-16.2% to -4.9%)  |
| Northern Mariana Islands | Physical violence by sharp object               | 4 (2 to 7)       | 2 (1 to 4)       | -53.9% (-61.1% to -46%)   |
| Northern Mariana Islands | Poisoning by carbon monoxide                    | 0 (0 to 0)       | 0 (0 to 0)       | 13.7% (4.6% to 23.7%)     |
| Northern Mariana Islands | Poisoning by other means                        | 0 (0 to 0)       | 0 (0 to 0)       | -1.2% (-8.5% to 5.7%)     |
| Northern Mariana Islands | Pulmonary aspiration and foreign body in airway | 0 (0 to 0)       | 0 (0 to 0)       | 18.9% (3.5% to 36.6%)     |
| Northern Mariana Islands | Self-harm by firearm                            | 0 (0 to 0)       | 0 (0 to 0)       | 5.8% (-6.8% to 17.3%)     |
| Northern Mariana Islands | Self-harm by other specified means              | 0 (0 to 0)       | 0 (0 to 1)       | 39.5% (27.7% to 53.5%)    |
| Northern Mariana Islands | Unintentional firearm injuries                  | 2 (1 to 4)       | 1 (0 to 3)       | -37.6% (-46.7% to -28.4%) |
| Northern Mariana Islands | Venomous animal contact                         | 1 (0 to 1)       | 1 (0 to 2)       | 9.2% (1.1% to 17.3%)      |
| Norway                   | Adverse effects of medical treatment            | 0 (0 to 0)       | 0 (0 to 0)       | 0% (0% to 0%)             |
| Norway                   | Conflict and terrorism                          | 0 (0 to 0)       | 0 (0 to 0)       | NA                        |
| Norway                   | Cyclist road injuries                           | 16 (10 to 24)    | 12 (7 to 17)     | -27.6% (-31.2% to -23.6%) |
| Norway                   | Drowning                                        | 0 (0 to 0)       | 0 (0 to 0)       | -14.2% (-18% to -10.3%)   |
| Norway                   | Environmental heat and cold exposure            | 1 (0 to 1)       | 1 (0 to 1)       | -16.5% (-20.5% to -13.1%) |
| Norway                   | Executions and police conflict                  | 0 (0 to 0)       | 0 (0 to 0)       | NA                        |
| Norway                   | Exposure to forces of nature                    | 0 (0 to 1)       | 0 (0 to 0)       | NA                        |
| Norway                   | Falls                                           | 146 (100 to 213) | 156 (107 to 227) | 6.6% (3.6% to 9.7%)       |
| Norway                   | Fire, heat, and hot substances                  | 1 (1 to 1)       | 1 (0 to 1)       | -27% (-31% to -23.5%)     |

|        |                                                 |                 |                  |                           |
|--------|-------------------------------------------------|-----------------|------------------|---------------------------|
| Norway | Foreign body in eyes                            | 0 (0 to 0)      | 0 (0 to 0)       | -1.6% (-2.7% to -0.4%)    |
| Norway | Foreign body in other body part                 | 2 (1 to 5)      | 2 (1 to 5)       | 1.6% (0.4% to 2.9%)       |
| Norway | Motor vehicle road injuries                     | 28 (18 to 40)   | 16 (11 to 23)    | -41.4% (-45.1% to -37.6%) |
| Norway | Motorcyclist road injuries                      | 18 (13 to 25)   | 10 (7 to 14)     | -46.4% (-49.6% to -43.4%) |
| Norway | Non-venomous animal contact                     | 2 (1 to 3)      | 2 (1 to 3)       | -9.3% (-10.8% to -7.9%)   |
| Norway | Other exposure to mechanical forces             | 86 (43 to 158)  | 69 (35 to 126)   | -19.7% (-24.3% to -15.4%) |
| Norway | Other road injuries                             | 3 (2 to 6)      | 1 (1 to 3)       | -58.6% (-64% to -53.3%)   |
| Norway | Other transport injuries                        | 6 (4 to 9)      | 3 (2 to 4)       | -48.8% (-51.6% to -45.9%) |
| Norway | Other unintentional injuries                    | 10 (6 to 17)    | 9 (5 to 17)      | -4.6% (-8.2% to -1.4%)    |
| Norway | Pedestrian road injuries                        | 9 (6 to 13)     | 5 (3 to 8)       | -38% (-43% to -32.5%)     |
| Norway | Physical violence by firearm                    | 0 (0 to 1)      | 1 (0 to 1)       | 28.3% (20.1% to 37.6%)    |
| Norway | Physical violence by other means                | 16 (10 to 24)   | 13 (8 to 20)     | -19.5% (-24% to -15.5%)   |
| Norway | Physical violence by sharp object               | 2 (1 to 3)      | 1 (1 to 3)       | -20.2% (-27.4% to -13.4%) |
| Norway | Poisoning by carbon monoxide                    | 0 (0 to 0)      | 0 (0 to 0)       | -1.1% (-5.1% to 2.2%)     |
| Norway | Poisoning by other means                        | 0 (0 to 0)      | 0 (0 to 0)       | 17% (13.2% to 20.4%)      |
| Norway | Pulmonary aspiration and foreign body in airway | 0 (0 to 1)      | 0 (0 to 1)       | -11.5% (-15.5% to -8.3%)  |
| Norway | Self-harm by firearm                            | 0 (0 to 1)      | 0 (0 to 0)       | -46.9% (-53% to -41%)     |
| Norway | Self-harm by other specified means              | 1 (0 to 1)      | 1 (0 to 1)       | -20.1% (-23.7% to -15.8%) |
| Norway | Unintentional firearm injuries                  | 1 (0 to 1)      | 1 (0 to 1)       | -2.6% (-7.5% to 2%)       |
| Norway | Venomous animal contact                         | 0 (0 to 1)      | 0 (0 to 1)       | -9.6% (-12.3% to -7.1%)   |
| Oman   | Adverse effects of medical treatment            | 0 (0 to 0)      | 0 (0 to 0)       | 0% (0% to 0%)             |
| Oman   | Conflict and terrorism                          | 0 (0 to 0)      | 0 (0 to 0)       | NA                        |
| Oman   | Cyclist road injuries                           | 25 (16 to 35)   | 20 (13 to 28)    | -20% (-28.6% to -9.8%)    |
| Oman   | Drowning                                        | 0 (0 to 0)      | 0 (0 to 1)       | 49.8% (30% to 72.7%)      |
| Oman   | Environmental heat and cold exposure            | 4 (3 to 6)      | 4 (3 to 5)       | -5.3% (-10.6% to 0%)      |
| Oman   | Executions and police conflict                  | 0 (0 to 0)      | 0 (0 to 0)       | NA                        |
| Oman   | Exposure to forces of nature                    | 0 (0 to 0)      | 0 (0 to 0)       | NA                        |
| Oman   | Falls                                           | 118 (93 to 150) | 149 (117 to 189) | 26.3% (20.9% to 31.6%)    |
| Oman   | Fire, heat, and hot substances                  | 1 (0 to 1)      | 1 (0 to 1)       | 5.3% (-3.1% to 13.7%)     |
| Oman   | Foreign body in eyes                            | 0 (0 to 0)      | 0 (0 to 0)       | 1.6% (0.7% to 2.8%)       |
| Oman   | Foreign body in other body part                 | 1 (1 to 3)      | 1 (1 to 3)       | -0.1% (-4.6% to 5%)       |
| Oman   | Motor vehicle road injuries                     | 100 (77 to 128) | 73 (57 to 93)    | -27.6% (-34.7% to -18.9%) |
| Oman   | Motorcyclist road injuries                      | 14 (10 to 19)   | 10 (7 to 14)     | -27.5% (-38% to -15.6%)   |
| Oman   | Non-venomous animal contact                     | 3 (1 to 5)      | 2 (1 to 4)       | -5% (-10.3% to -0.1%)     |
| Oman   | Other exposure to mechanical forces             | 36 (23 to 57)   | 26 (15 to 41)    | -29.3% (-35.9% to -22.8%) |
| Oman   | Other road injuries                             | 2 (1 to 4)      | 2 (1 to 4)       | -4.2% (-15.6% to 8.8%)    |
| Oman   | Other transport injuries                        | 5 (3 to 7)      | 5 (4 to 7)       | 7.3% (1.4% to 13%)        |
| Oman   | Other unintentional injuries                    | 17 (10 to 28)   | 18 (11 to 31)    | 9.3% (4.5% to 14.7%)      |
| Oman   | Pedestrian road injuries                        | 74 (57 to 91)   | 57 (44 to 71)    | -22.5% (-29.1% to -14.6%) |
| Oman   | Physical violence by firearm                    | 0 (0 to 0)      | 1 (0 to 1)       | 161.9% (132% to 195.9%)   |
| Oman   | Physical violence by other means                | 10 (7 to 14)    | 10 (7 to 15)     | 6.6% (0.3% to 13%)        |
| Oman   | Physical violence by sharp object               | 1 (1 to 2)      | 1 (1 to 2)       | 5.5% (-3.8% to 15.5%)     |
| Oman   | Poisoning by carbon monoxide                    | 0 (0 to 0)      | 0 (0 to 0)       | 33.3% (19.1% to 49.5%)    |

|          |                                                 |               |                |                           |
|----------|-------------------------------------------------|---------------|----------------|---------------------------|
| Oman     | Poisoning by other means                        | 0 (0 to 0)    | 0 (0 to 0)     | -25.7% (-34.9% to -17.5%) |
| Oman     | Pulmonary aspiration and foreign body in airway | 0 (0 to 1)    | 0 (0 to 1)     | -2.1% (-9.7% to 5.1%)     |
| Oman     | Self-harm by firearm                            | 0 (0 to 0)    | 0 (0 to 0)     | 16.3% (1.8% to 33.9%)     |
| Oman     | Self-harm by other specified means              | 1 (1 to 1)    | 1 (1 to 1)     | 2.1% (-5.5% to 10%)       |
| Oman     | Unintentional firearm injuries                  | 2 (1 to 3)    | 2 (1 to 3)     | 2.1% (-8.2% to 13.2%)     |
| Oman     | Venomous animal contact                         | 1 (1 to 3)    | 1 (1 to 3)     | -3% (-8.7% to 3.5%)       |
| Pakistan | Adverse effects of medical treatment            | 0 (0 to 0)    | 0 (0 to 0)     | 0% (0% to 0%)             |
| Pakistan | Conflict and terrorism                          | 1 (1 to 3)    | 1 (0 to 3)     | NA                        |
| Pakistan | Cyclist road injuries                           | 51 (37 to 69) | 67 (48 to 92)  | 31.4% (26.1% to 36%)      |
| Pakistan | Drowning                                        | 0 (0 to 0)    | 0 (0 to 0)     | -6% (-15.9% to 5.3%)      |
| Pakistan | Environmental heat and cold exposure            | 3 (2 to 4)    | 3 (2 to 4)     | 2.1% (-1.5% to 5.6%)      |
| Pakistan | Executions and police conflict                  | 0 (0 to 0)    | 0 (0 to 0)     | NA                        |
| Pakistan | Exposure to forces of nature                    | 0 (0 to 0)    | 0 (0 to 0)     | NA                        |
| Pakistan | Falls                                           | 36 (28 to 48) | 48 (37 to 64)  | 31.8% (28.1% to 35.6%)    |
| Pakistan | Fire, heat, and hot substances                  | 0 (0 to 1)    | 0 (0 to 1)     | -6.9% (-10.8% to -2.7%)   |
| Pakistan | Foreign body in eyes                            | 0 (0 to 0)    | 0 (0 to 0)     | -1.3% (-2.3% to -0.6%)    |
| Pakistan | Foreign body in other body part                 | 1 (1 to 3)    | 1 (1 to 3)     | -2.9% (-6.2% to 0.9%)     |
| Pakistan | Motor vehicle road injuries                     | 32 (23 to 43) | 48 (34 to 65)  | 50.9% (45.1% to 57.1%)    |
| Pakistan | Motorcyclist road injuries                      | 27 (20 to 37) | 47 (35 to 63)  | 74.6% (68% to 81.6%)      |
| Pakistan | Non-venomous animal contact                     | 8 (5 to 14)   | 7 (4 to 12)    | -15.5% (-18.5% to -12.5%) |
| Pakistan | Other exposure to mechanical forces             | 9 (5 to 15)   | 9 (5 to 15)    | -1.6% (-5.4% to 2.8%)     |
| Pakistan | Other road injuries                             | 1 (1 to 3)    | 2 (1 to 3)     | 24.4% (16.7% to 30.8%)    |
| Pakistan | Other transport injuries                        | 5 (4 to 7)    | 6 (5 to 8)     | 14.2% (9.7% to 18.6%)     |
| Pakistan | Other unintentional injuries                    | 10 (7 to 16)  | 9 (6 to 15)    | -11.2% (-14.2% to -7.7%)  |
| Pakistan | Pedestrian road injuries                        | 27 (20 to 36) | 38 (28 to 51)  | 40.2% (34.8% to 45.5%)    |
| Pakistan | Physical violence by firearm                    | 0 (0 to 0)    | 0 (0 to 0)     | -12.8% (-19.3% to -4.8%)  |
| Pakistan | Physical violence by other means                | 44 (31 to 60) | 41 (29 to 57)  | -5.8% (-9.8% to -1.4%)    |
| Pakistan | Physical violence by sharp object               | 2 (1 to 3)    | 2 (1 to 3)     | 0.1% (-5.8% to 6.9%)      |
| Pakistan | Poisoning by carbon monoxide                    | 0 (0 to 0)    | 0 (0 to 0)     | -14.9% (-21.8% to -8.2%)  |
| Pakistan | Poisoning by other means                        | 0 (0 to 0)    | 0 (0 to 0)     | -20.3% (-26.1% to -14.6%) |
| Pakistan | Pulmonary aspiration and foreign body in airway | 0 (0 to 1)    | 0 (0 to 1)     | -7.6% (-12.8% to -2.4%)   |
| Pakistan | Self-harm by firearm                            | 0 (0 to 1)    | 0 (0 to 1)     | 19.3% (9.9% to 27.9%)     |
| Pakistan | Self-harm by other specified means              | 1 (1 to 2)    | 1 (1 to 2)     | 23.4% (18.6% to 28.3%)    |
| Pakistan | Unintentional firearm injuries                  | 1 (0 to 1)    | 1 (0 to 1)     | -7.9% (-12.8% to -2.7%)   |
| Pakistan | Venomous animal contact                         | 3 (1 to 7)    | 3 (1 to 6)     | -8.4% (-12.8% to -4.1%)   |
| Palau    | Adverse effects of medical treatment            | 0 (0 to 0)    | 0 (0 to 0)     | 0% (0% to 0%)             |
| Palau    | Conflict and terrorism                          | 0 (0 to 0)    | 0 (0 to 0)     | NA                        |
| Palau    | Cyclist road injuries                           | 7 (4 to 11)   | 7 (4 to 11)    | 5.8% (-1.4% to 14.1%)     |
| Palau    | Drowning                                        | 0 (0 to 0)    | 0 (0 to 1)     | 26.1% (16.8% to 37.1%)    |
| Palau    | Environmental heat and cold exposure            | 1 (0 to 1)    | 1 (0 to 1)     | -3% (-8.4% to 3.1%)       |
| Palau    | Executions and police conflict                  | 0 (0 to 0)    | 0 (0 to 0)     | NA                        |
| Palau    | Exposure to forces of nature                    | 0 (0 to 0)    | 0 (0 to 0)     | NA                        |
| Palau    | Falls                                           | 60 (38 to 88) | 78 (51 to 117) | 30.8% (25.5% to 36.2%)    |



|           |                                                 |                 |                 |                           |
|-----------|-------------------------------------------------|-----------------|-----------------|---------------------------|
| Palau     | Fire, heat, and hot substances                  | 0 (0 to 1)      | 0 (0 to 1)      | -9.4% (-14.5% to -4.2%)   |
| Palau     | Foreign body in eyes                            | 0 (0 to 0)      | 0 (0 to 0)      | 2.6% (1.4% to 4.6%)       |
| Palau     | Foreign body in other body part                 | 1 (0 to 2)      | 1 (0 to 2)      | -4.7% (-9.2% to 0.5%)     |
| Palau     | Motor vehicle road injuries                     | 24 (16 to 35)   | 24 (16 to 35)   | -0.8% (-8.1% to 7.3%)     |
| Palau     | Motorcyclist road injuries                      | 27 (20 to 37)   | 27 (20 to 36)   | -0.1% (-7.4% to 6.8%)     |
| Palau     | Non-venomous animal contact                     | 4 (2 to 8)      | 4 (2 to 8)      | -3.5% (-8.6% to 2.1%)     |
| Palau     | Other exposure to mechanical forces             | 35 (18 to 62)   | 30 (15 to 55)   | -11.8% (-17.2% to -6%)    |
| Palau     | Other road injuries                             | 2 (1 to 4)      | 3 (1 to 5)      | 9.4% (-1.9% to 22.1%)     |
| Palau     | Other transport injuries                        | 6 (4 to 8)      | 6 (4 to 8)      | -1.7% (-7.3% to 3.6%)     |
| Palau     | Other unintentional injuries                    | 4 (2 to 6)      | 3 (2 to 6)      | -8.2% (-13.5% to -3%)     |
| Palau     | Pedestrian road injuries                        | 16 (11 to 22)   | 16 (11 to 22)   | 0.6% (-6.7% to 8.8%)      |
| Palau     | Physical violence by firearm                    | 0 (0 to 0)      | 0 (0 to 0)      | 27.3% (14.1% to 41.3%)    |
| Palau     | Physical violence by other means                | 46 (30 to 69)   | 43 (29 to 65)   | -5.5% (-11.3% to 0.1%)    |
| Palau     | Physical violence by sharp object               | 2 (1 to 3)      | 1 (1 to 3)      | -10.4% (-19.8% to -0.4%)  |
| Palau     | Poisoning by carbon monoxide                    | 0 (0 to 0)      | 0 (0 to 0)      | 1.2% (-10.2% to 13.6%)    |
| Palau     | Poisoning by other means                        | 0 (0 to 0)      | 0 (0 to 0)      | -27.3% (-33.9% to -20.9%) |
| Palau     | Pulmonary aspiration and foreign body in airway | 0 (0 to 0)      | 0 (0 to 0)      | -9.5% (-19.1% to 2.1%)    |
| Palau     | Self-harm by firearm                            | 0 (0 to 0)      | 0 (0 to 0)      | 12.6% (3.7% to 23.8%)     |
| Palau     | Self-harm by other specified means              | 0 (0 to 1)      | 0 (0 to 0)      | -4.2% (-11.8% to 3.6%)    |
| Palau     | Unintentional firearm injuries                  | 1 (0 to 2)      | 1 (0 to 2)      | -11.9% (-19.9% to -1.3%)  |
| Palau     | Venomous animal contact                         | 2 (1 to 4)      | 2 (1 to 4)      | -3.8% (-10.7% to 5.9%)    |
| Palestine | Adverse effects of medical treatment            | 0 (0 to 0)      | 0 (0 to 0)      | 0% (0% to 0%)             |
| Palestine | Conflict and terrorism                          | 143 (57 to 327) | 7 (3 to 16)     | NA                        |
| Palestine | Cyclist road injuries                           | 13 (9 to 19)    | 13 (9 to 18)    | -3.5% (-12% to 5.9%)      |
| Palestine | Drowning                                        | 0 (0 to 0)      | 0 (0 to 1)      | 51.3% (31.8% to 71.8%)    |
| Palestine | Environmental heat and cold exposure            | 3 (2 to 4)      | 3 (2 to 4)      | 3.3% (-1.8% to 8.3%)      |
| Palestine | Executions and police conflict                  | 0 (0 to 0)      | 3 (1 to 5)      | NA                        |
| Palestine | Exposure to forces of nature                    | 0 (0 to 0)      | 0 (0 to 0)      | NA                        |
| Palestine | Falls                                           | 92 (71 to 121)  | 102 (79 to 134) | 10.6% (5.7% to 15%)       |
| Palestine | Fire, heat, and hot substances                  | 1 (0 to 1)      | 1 (0 to 1)      | -4.6% (-16.5% to 6.7%)    |
| Palestine | Foreign body in eyes                            | 0 (0 to 0)      | 0 (0 to 0)      | 1% (0.4% to 2.2%)         |
| Palestine | Foreign body in other body part                 | 1 (1 to 3)      | 1 (1 to 3)      | 0.6% (-4.1% to 5.4%)      |
| Palestine | Motor vehicle road injuries                     | 23 (18 to 30)   | 18 (14 to 23)   | -23.2% (-29.7% to -16.2%) |
| Palestine | Motorcyclist road injuries                      | 5 (4 to 7)      | 4 (3 to 6)      | -15% (-24.4% to -4.5%)    |
| Palestine | Non-venomous animal contact                     | 5 (3 to 8)      | 5 (2 to 8)      | -2.6% (-7.9% to 2.4%)     |
| Palestine | Other exposure to mechanical forces             | 25 (15 to 42)   | 24 (14 to 38)   | -6.4% (-14.1% to 0.7%)    |
| Palestine | Other road injuries                             | 2 (1 to 3)      | 2 (1 to 3)      | -0.7% (-10.3% to 10%)     |
| Palestine | Other transport injuries                        | 5 (4 to 7)      | 6 (4 to 8)      | 6.6% (1.3% to 12.1%)      |
| Palestine | Other unintentional injuries                    | 18 (12 to 30)   | 18 (11 to 29)   | -3.5% (-11.8% to 4%)      |
| Palestine | Pedestrian road injuries                        | 14 (11 to 19)   | 12 (9 to 15)    | -16.6% (-24% to -9%)      |
| Palestine | Physical violence by firearm                    | 0 (0 to 1)      | 2 (1 to 3)      | 492.4% (393.7% to 615.6%) |
| Palestine | Physical violence by other means                | 12 (8 to 17)    | 26 (18 to 36)   | 116.4% (93.5% to 141.1%)  |
| Palestine | Physical violence by sharp object               | 2 (1 to 3)      | 3 (2 to 5)      | 91.8% (64.7% to 120.7%)   |

|                  |                                                 |                |                |                           |
|------------------|-------------------------------------------------|----------------|----------------|---------------------------|
| Palestine        | Poisoning by carbon monoxide                    | 0 (0 to 0)     | 0 (0 to 0)     | 58.2% (44% to 76.6%)      |
| Palestine        | Poisoning by other means                        | 0 (0 to 0)     | 0 (0 to 0)     | 9.3% (0.9% to 17.8%)      |
| Palestine        | Pulmonary aspiration and foreign body in airway | 0 (0 to 1)     | 0 (0 to 1)     | -0.1% (-7.7% to 7.5%)     |
| Palestine        | Self-harm by firearm                            | 0 (0 to 0)     | 0 (0 to 0)     | 26.2% (12.6% to 43.2%)    |
| Palestine        | Self-harm by other specified means              | 1 (0 to 1)     | 1 (0 to 1)     | 1.7% (-4.3% to 8.1%)      |
| Palestine        | Unintentional firearm injuries                  | 3 (2 to 4)     | 2 (1 to 3)     | -33.4% (-42.9% to -22.4%) |
| Palestine        | Venomous animal contact                         | 3 (1 to 6)     | 3 (1 to 5)     | -3.1% (-9.6% to 2.9%)     |
| Panama           | Adverse effects of medical treatment            | 0 (0 to 0)     | 0 (0 to 0)     | 0% (0% to 0%)             |
| Panama           | Conflict and terrorism                          | 0 (0 to 1)     | 0 (0 to 0)     | NA                        |
| Panama           | Cyclist road injuries                           | 29 (21 to 39)  | 21 (15 to 29)  | -28% (-36.1% to -19.3%)   |
| Panama           | Drowning                                        | 0 (0 to 1)     | 0 (0 to 1)     | 2% (-9.9% to 15.7%)       |
| Panama           | Environmental heat and cold exposure            | 3 (2 to 5)     | 3 (2 to 5)     | 2.7% (-1.4% to 8.1%)      |
| Panama           | Executions and police conflict                  | 0 (0 to 0)     | 0 (0 to 0)     | NA                        |
| Panama           | Exposure to forces of nature                    | 0 (0 to 0)     | 0 (0 to 0)     | NA                        |
| Panama           | Falls                                           | 88 (68 to 115) | 88 (66 to 119) | -0.4% (-5.9% to 4.9%)     |
| Panama           | Fire, heat, and hot substances                  | 3 (2 to 5)     | 3 (2 to 6)     | 1% (-4.3% to 7.7%)        |
| Panama           | Foreign body in eyes                            | 0 (0 to 0)     | 0 (0 to 0)     | -0.3% (-0.7% to -0.1%)    |
| Panama           | Foreign body in other body part                 | 1 (1 to 2)     | 1 (1 to 2)     | -4.2% (-10.1% to 1.9%)    |
| Panama           | Motor vehicle road injuries                     | 55 (43 to 69)  | 47 (37 to 59)  | -15.2% (-23% to -6.7%)    |
| Panama           | Motorcyclist road injuries                      | 6 (4 to 8)     | 8 (6 to 11)    | 35% (21.4% to 50.4%)      |
| Panama           | Non-venomous animal contact                     | 6 (3 to 10)    | 4 (2 to 8)     | -22.5% (-27.8% to -16.6%) |
| Panama           | Other exposure to mechanical forces             | 39 (23 to 63)  | 39 (23 to 64)  | 0.8% (-5.6% to 7%)        |
| Panama           | Other road injuries                             | 5 (3 to 9)     | 5 (3 to 8)     | -4.3% (-14.5% to 6.7%)    |
| Panama           | Other transport injuries                        | 3 (2 to 4)     | 3 (2 to 4)     | -1.9% (-7.7% to 4.5%)     |
| Panama           | Other unintentional injuries                    | 12 (8 to 20)   | 10 (6 to 17)   | -14.7% (-20.7% to -9.1%)  |
| Panama           | Pedestrian road injuries                        | 31 (25 to 39)  | 21 (16 to 26)  | -33.7% (-40.7% to -26.6%) |
| Panama           | Physical violence by firearm                    | 1 (1 to 2)     | 5 (4 to 7)     | 256.2% (184.9% to 349.5%) |
| Panama           | Physical violence by other means                | 16 (11 to 24)  | 25 (17 to 37)  | 54.3% (33.1% to 79.2%)    |
| Panama           | Physical violence by sharp object               | 8 (5 to 12)    | 9 (6 to 14)    | 9.1% (-8.8% to 31%)       |
| Panama           | Poisoning by carbon monoxide                    | 0 (0 to 0)     | 0 (0 to 0)     | 39.1% (25.4% to 55%)      |
| Panama           | Poisoning by other means                        | 0 (0 to 0)     | 0 (0 to 0)     | 0.9% (-6.4% to 10.8%)     |
| Panama           | Pulmonary aspiration and foreign body in airway | 1 (0 to 1)     | 0 (0 to 1)     | -42.3% (-50% to -33%)     |
| Panama           | Self-harm by firearm                            | 0 (0 to 0)     | 0 (0 to 0)     | 3.1% (-12.2% to 18.6%)    |
| Panama           | Self-harm by other specified means              | 0 (0 to 1)     | 0 (0 to 1)     | 0.2% (-7.6% to 8.4%)      |
| Panama           | Unintentional firearm injuries                  | 2 (1 to 4)     | 3 (2 to 4)     | 13.7% (3% to 25.9%)       |
| Panama           | Venomous animal contact                         | 11 (6 to 19)   | 7 (4 to 13)    | -33.6% (-38.9% to -29.1%) |
| Papua New Guinea | Adverse effects of medical treatment            | 0 (0 to 0)     | 0 (0 to 0)     | 0% (0% to 0%)             |
| Papua New Guinea | Conflict and terrorism                          | 5 (2 to 12)    | 0 (0 to 0)     | NA                        |
| Papua New Guinea | Cyclist road injuries                           | 11 (7 to 15)   | 11 (7 to 16)   | 5.7% (-1.7% to 13.4%)     |
| Papua New Guinea | Drowning                                        | 0 (0 to 0)     | 0 (0 to 0)     | 4.8% (-4.7% to 14.4%)     |
| Papua New Guinea | Environmental heat and cold exposure            | 2 (1 to 3)     | 2 (1 to 3)     | -1.8% (-7.5% to 4%)       |
| Papua New Guinea | Executions and police conflict                  | 0 (0 to 0)     | 0 (0 to 0)     | NA                        |
| Papua New Guinea | Exposure to forces of nature                    | 0 (0 to 0)     | 1 (1 to 2)     | NA                        |

|                  |                                                 |                 |                 |                           |
|------------------|-------------------------------------------------|-----------------|-----------------|---------------------------|
| Papua New Guinea | Falls                                           | 61 (48 to 79)   | 89 (70 to 115)  | 46.1% (40.3% to 52.7%)    |
| Papua New Guinea | Fire, heat, and hot substances                  | 3 (2 to 4)      | 3 (2 to 4)      | 0.6% (-5.1% to 6.3%)      |
| Papua New Guinea | Foreign body in eyes                            | 0 (0 to 0)      | 0 (0 to 0)      | -0.1% (-0.4% to 0.3%)     |
| Papua New Guinea | Foreign body in other body part                 | 1 (0 to 1)      | 1 (0 to 1)      | -2.2% (-7.1% to 2.6%)     |
| Papua New Guinea | Motor vehicle road injuries                     | 33 (26 to 42)   | 33 (26 to 43)   | -0.1% (-7.2% to 7.8%)     |
| Papua New Guinea | Motorcyclist road injuries                      | 19 (14 to 24)   | 20 (15 to 26)   | 5.8% (-2.7% to 14%)       |
| Papua New Guinea | Non-venomous animal contact                     | 5 (3 to 9)      | 4 (2 to 8)      | -11.2% (-16.5% to -6.2%)  |
| Papua New Guinea | Other exposure to mechanical forces             | 11 (6 to 18)    | 10 (6 to 17)    | -4.4% (-9.8% to 0.8%)     |
| Papua New Guinea | Other road injuries                             | 2 (1 to 3)      | 2 (1 to 3)      | 4.6% (-5.7% to 15.2%)     |
| Papua New Guinea | Other transport injuries                        | 9 (7 to 11)     | 8 (7 to 11)     | -7.8% (-12.1% to -2.9%)   |
| Papua New Guinea | Other unintentional injuries                    | 5 (3 to 8)      | 5 (3 to 8)      | 1.8% (-3.3% to 7.2%)      |
| Papua New Guinea | Pedestrian road injuries                        | 18 (13 to 23)   | 17 (13 to 22)   | -4.6% (-12.6% to 3.2%)    |
| Papua New Guinea | Physical violence by firearm                    | 0 (0 to 0)      | 0 (0 to 0)      | 63.9% (49.6% to 79.1%)    |
| Papua New Guinea | Physical violence by other means                | 28 (20 to 39)   | 43 (30 to 60)   | 52% (42.5% to 62.5%)      |
| Papua New Guinea | Physical violence by sharp object               | 3 (1 to 5)      | 4 (2 to 7)      | 41.4% (27.7% to 55.8%)    |
| Papua New Guinea | Poisoning by carbon monoxide                    | 0 (0 to 0)      | 0 (0 to 0)      | 14.8% (3.7% to 27.8%)     |
| Papua New Guinea | Poisoning by other means                        | 0 (0 to 0)      | 0 (0 to 0)      | -9.6% (-15.9% to -2.2%)   |
| Papua New Guinea | Pulmonary aspiration and foreign body in airway | 0 (0 to 0)      | 0 (0 to 0)      | 2% (-9.6% to 14.4%)       |
| Papua New Guinea | Self-harm by firearm                            | 0 (0 to 0)      | 0 (0 to 0)      | -0.6% (-11.6% to 10.7%)   |
| Papua New Guinea | Self-harm by other specified means              | 1 (0 to 1)      | 1 (0 to 1)      | 7% (-0.8% to 15.2%)       |
| Papua New Guinea | Unintentional firearm injuries                  | 2 (1 to 3)      | 2 (1 to 3)      | -1.9% (-8% to 5.4%)       |
| Papua New Guinea | Venomous animal contact                         | 4 (2 to 8)      | 4 (2 to 7)      | -13.1% (-18.6% to -7.9%)  |
| Paraguay         | Adverse effects of medical treatment            | 0 (0 to 0)      | 0 (0 to 0)      | 0% (0% to 0%)             |
| Paraguay         | Conflict and terrorism                          | 0 (0 to 0)      | 0 (0 to 0)      | NA                        |
| Paraguay         | Cyclist road injuries                           | 15 (10 to 21)   | 13 (9 to 20)    | -10.9% (-20.7% to -0.1%)  |
| Paraguay         | Drowning                                        | 0 (0 to 0)      | 0 (0 to 0)      | 5.8% (-5.8% to 17.1%)     |
| Paraguay         | Environmental heat and cold exposure            | 9 (7 to 13)     | 10 (7 to 14)    | 9.3% (4.6% to 15.4%)      |
| Paraguay         | Executions and police conflict                  | 0 (0 to 0)      | 0 (0 to 0)      | NA                        |
| Paraguay         | Exposure to forces of nature                    | 0 (0 to 0)      | 0 (0 to 0)      | NA                        |
| Paraguay         | Falls                                           | 108 (81 to 143) | 111 (84 to 148) | 3.1% (-1% to 7.2%)        |
| Paraguay         | Fire, heat, and hot substances                  | 2 (1 to 4)      | 2 (1 to 4)      | -4% (-8.5% to 1.2%)       |
| Paraguay         | Foreign body in eyes                            | 0 (0 to 0)      | 0 (0 to 0)      | 0.2% (0.1% to 0.5%)       |
| Paraguay         | Foreign body in other body part                 | 0 (0 to 1)      | 0 (0 to 1)      | -6% (-10.7% to -0.7%)     |
| Paraguay         | Motor vehicle road injuries                     | 8 (6 to 11)     | 9 (6 to 13)     | 10.4% (-2.9% to 24.5%)    |
| Paraguay         | Motorcyclist road injuries                      | 29 (22 to 37)   | 47 (37 to 58)   | 62.2% (43% to 85.1%)      |
| Paraguay         | Non-venomous animal contact                     | 2 (1 to 4)      | 2 (1 to 3)      | -17.1% (-22.3% to -11.8%) |
| Paraguay         | Other exposure to mechanical forces             | 26 (16 to 42)   | 24 (14 to 38)   | -8.2% (-14.5% to -1.1%)   |
| Paraguay         | Other road injuries                             | 5 (3 to 8)      | 4 (2 to 7)      | -3.1% (-14.5% to 8.7%)    |
| Paraguay         | Other transport injuries                        | 2 (2 to 3)      | 2 (2 to 3)      | -10.1% (-14.5% to -5.7%)  |
| Paraguay         | Other unintentional injuries                    | 27 (18 to 41)   | 24 (16 to 37)   | -10.1% (-14.5% to -5%)    |
| Paraguay         | Pedestrian road injuries                        | 26 (20 to 33)   | 27 (20 to 34)   | 1.4% (-9.1% to 13.9%)     |
| Paraguay         | Physical violence by firearm                    | 2 (1 to 2)      | 2 (2 to 3)      | 48.4% (27.7% to 73.4%)    |
| Paraguay         | Physical violence by other means                | 10 (7 to 15)    | 10 (7 to 15)    | 0.3% (-9.6% to 10.4%)     |

|             |                                                 |                |                |                           |
|-------------|-------------------------------------------------|----------------|----------------|---------------------------|
| Paraguay    | Physical violence by sharp object               | 4 (3 to 7)     | 4 (2 to 6)     | -7.3% (-19.5% to 6%)      |
| Paraguay    | Poisoning by carbon monoxide                    | 0 (0 to 0)     | 0 (0 to 0)     | 17.4% (6.3% to 28.8%)     |
| Paraguay    | Poisoning by other means                        | 0 (0 to 0)     | 0 (0 to 0)     | -16.8% (-22.7% to -11.4%) |
| Paraguay    | Pulmonary aspiration and foreign body in airway | 1 (0 to 1)     | 0 (0 to 1)     | -36.3% (-43.5% to -27.8%) |
| Paraguay    | Self-harm by firearm                            | 0 (0 to 0)     | 0 (0 to 0)     | 67.7% (49.2% to 87.5%)    |
| Paraguay    | Self-harm by other specified means              | 0 (0 to 0)     | 0 (0 to 1)     | 65.7% (52.2% to 82.2%)    |
| Paraguay    | Unintentional firearm injuries                  | 2 (1 to 4)     | 2 (1 to 3)     | -25% (-32.7% to -16.4%)   |
| Paraguay    | Venomous animal contact                         | 5 (3 to 10)    | 5 (2 to 8)     | -15.4% (-19.8% to -11%)   |
| Peru        | Adverse effects of medical treatment            | 0 (0 to 0)     | 0 (0 to 0)     | 0% (0% to 0%)             |
| Peru        | Conflict and terrorism                          | 65 (26 to 148) | 0 (0 to 0)     | NA                        |
| Peru        | Cyclist road injuries                           | 12 (8 to 16)   | 11 (8 to 16)   | -2.4% (-10.3% to 7.5%)    |
| Peru        | Drowning                                        | 0 (0 to 1)     | 0 (0 to 1)     | 22.7% (5.3% to 41.3%)     |
| Peru        | Environmental heat and cold exposure            | 9 (7 to 13)    | 9 (6 to 12)    | -3.9% (-8.3% to 0.7%)     |
| Peru        | Executions and police conflict                  | 0 (0 to 0)     | 0 (0 to 0)     | NA                        |
| Peru        | Exposure to forces of nature                    | 2 (1 to 5)     | 1 (0 to 1)     | NA                        |
| Peru        | Falls                                           | 54 (42 to 71)  | 81 (63 to 106) | 49.3% (43.2% to 55.3%)    |
| Peru        | Fire, heat, and hot substances                  | 3 (2 to 5)     | 3 (2 to 5)     | -10.7% (-19.8% to -3%)    |
| Peru        | Foreign body in eyes                            | 0 (0 to 0)     | 0 (0 to 0)     | 0.2% (-0.1% to 0.6%)      |
| Peru        | Foreign body in other body part                 | 3 (2 to 7)     | 2 (1 to 5)     | -33.7% (-41.6% to -25.2%) |
| Peru        | Motor vehicle road injuries                     | 18 (13 to 23)  | 15 (11 to 20)  | -14.2% (-21.5% to -5.6%)  |
| Peru        | Motorcyclist road injuries                      | 7 (5 to 9)     | 8 (6 to 11)    | 24.3% (13.8% to 36.8%)    |
| Peru        | Non-venomous animal contact                     | 3 (2 to 6)     | 3 (2 to 5)     | -9.4% (-15% to -4.1%)     |
| Peru        | Other exposure to mechanical forces             | 34 (20 to 55)  | 35 (21 to 56)  | 2.8% (-4.7% to 10.1%)     |
| Peru        | Other road injuries                             | 3 (2 to 5)     | 3 (2 to 4)     | -1.7% (-10.4% to 8.8%)    |
| Peru        | Other transport injuries                        | 5 (4 to 6)     | 5 (4 to 6)     | -1.2% (-6.9% to 5.5%)     |
| Peru        | Other unintentional injuries                    | 23 (16 to 36)  | 17 (11 to 27)  | -27.5% (-34.1% to -20.2%) |
| Peru        | Pedestrian road injuries                        | 19 (15 to 23)  | 16 (12 to 20)  | -15.1% (-22.3% to -7.6%)  |
| Peru        | Physical violence by firearm                    | 0 (0 to 0)     | 1 (0 to 1)     | 112.9% (86.2% to 143.2%)  |
| Peru        | Physical violence by other means                | 9 (6 to 13)    | 8 (5 to 11)    | -16% (-22.9% to -9.1%)    |
| Peru        | Physical violence by sharp object               | 2 (1 to 3)     | 2 (1 to 3)     | -3.9% (-14.6% to 7.3%)    |
| Peru        | Poisoning by carbon monoxide                    | 0 (0 to 0)     | 0 (0 to 0)     | 40.7% (22.2% to 59.9%)    |
| Peru        | Poisoning by other means                        | 0 (0 to 0)     | 0 (0 to 0)     | -9.8% (-19.2% to -1.1%)   |
| Peru        | Pulmonary aspiration and foreign body in airway | 2 (1 to 4)     | 1 (0 to 1)     | -65.6% (-70.9% to -58.8%) |
| Peru        | Self-harm by firearm                            | 0 (0 to 0)     | 0 (0 to 0)     | 37.9% (23.2% to 54.7%)    |
| Peru        | Self-harm by other specified means              | 0 (0 to 1)     | 0 (0 to 1)     | 1.2% (-7.1% to 9.5%)      |
| Peru        | Unintentional firearm injuries                  | 5 (3 to 8)     | 4 (3 to 7)     | -19.6% (-27.9% to -10.6%) |
| Peru        | Venomous animal contact                         | 6 (3 to 10)    | 5 (3 to 9)     | -9.3% (-13.6% to -5%)     |
| Philippines | Adverse effects of medical treatment            | 0 (0 to 0)     | 0 (0 to 0)     | 0% (0% to 0%)             |
| Philippines | Conflict and terrorism                          | 14 (6 to 32)   | 2 (1 to 4)     | NA                        |
| Philippines | Cyclist road injuries                           | 15 (10 to 22)  | 13 (9 to 19)   | -10.8% (-13.9% to -7.5%)  |
| Philippines | Drowning                                        | 1 (0 to 1)     | 0 (0 to 1)     | -40.1% (-42.8% to -37.5%) |
| Philippines | Environmental heat and cold exposure            | 2 (1 to 2)     | 2 (1 to 2)     | -9.8% (-11.8% to -7.8%)   |
| Philippines | Executions and police conflict                  | 0 (0 to 0)     | 1 (1 to 2)     | NA                        |

|             |                                                 |                  |                  |                           |
|-------------|-------------------------------------------------|------------------|------------------|---------------------------|
| Philippines | Exposure to forces of nature                    | 29 (18 to 50)    | 0 (0 to 0)       | NA                        |
| Philippines | Falls                                           | 57 (44 to 74)    | 69 (54 to 88)    | 21.3% (18.9% to 23.7%)    |
| Philippines | Fire, heat, and hot substances                  | 1 (1 to 2)       | 1 (1 to 2)       | -1.4% (-4.9% to 1.1%)     |
| Philippines | Foreign body in eyes                            | 0 (0 to 0)       | 0 (0 to 0)       | 0.1% (-4.4% to 5.4%)      |
| Philippines | Foreign body in other body part                 | 1 (1 to 2)       | 1 (1 to 2)       | 0.2% (-3.1% to 2.7%)      |
| Philippines | Motor vehicle road injuries                     | 20 (14 to 28)    | 19 (13 to 26)    | -4.2% (-7.1% to -1.4%)    |
| Philippines | Motorcyclist road injuries                      | 27 (20 to 36)    | 32 (25 to 42)    | 20.6% (16.7% to 25.2%)    |
| Philippines | Non-venomous animal contact                     | 8 (5 to 13)      | 7 (4 to 12)      | -8% (-11.8% to -2.9%)     |
| Philippines | Other exposure to mechanical forces             | 15 (9 to 25)     | 15 (8 to 25)     | 1.3% (-3% to 4.8%)        |
| Philippines | Other road injuries                             | 2 (1 to 3)       | 1 (1 to 2)       | -10.8% (-14.3% to -7.4%)  |
| Philippines | Other transport injuries                        | 5 (3 to 6)       | 4 (3 to 6)       | -4.7% (-8.6% to -1.5%)    |
| Philippines | Other unintentional injuries                    | 9 (6 to 15)      | 8 (5 to 13)      | -13% (-15.8% to -10.6%)   |
| Philippines | Pedestrian road injuries                        | 14 (10 to 18)    | 11 (8 to 15)     | -20.3% (-22.9% to -17.7%) |
| Philippines | Physical violence by firearm                    | 3 (2 to 4)       | 3 (2 to 4)       | -4.5% (-10.3% to 0.9%)    |
| Philippines | Physical violence by other means                | 47 (31 to 69)    | 35 (24 to 51)    | -24.8% (-27.3% to -22%)   |
| Philippines | Physical violence by sharp object               | 21 (13 to 32)    | 16 (10 to 24)    | -25% (-28.1% to -21.3%)   |
| Philippines | Poisoning by carbon monoxide                    | 0 (0 to 0)       | 0 (0 to 0)       | 16.5% (12.7% to 20.8%)    |
| Philippines | Poisoning by other means                        | 0 (0 to 0)       | 0 (0 to 0)       | 19.1% (15.4% to 22.9%)    |
| Philippines | Pulmonary aspiration and foreign body in airway | 0 (0 to 0)       | 0 (0 to 0)       | -34.1% (-37.6% to -30.2%) |
| Philippines | Self-harm by firearm                            | 0 (0 to 0)       | 0 (0 to 0)       | -19.7% (-27.2% to -12.5%) |
| Philippines | Self-harm by other specified means              | 1 (1 to 2)       | 1 (1 to 1)       | -9.3% (-11% to -7.3%)     |
| Philippines | Unintentional firearm injuries                  | 1 (1 to 2)       | 2 (1 to 4)       | 61.1% (49.9% to 73.6%)    |
| Philippines | Venomous animal contact                         | 1 (0 to 3)       | 1 (0 to 2)       | -41.1% (-47.5% to -35.1%) |
| Poland      | Adverse effects of medical treatment            | 0 (0 to 0)       | 0 (0 to 0)       | 0% (0% to 0%)             |
| Poland      | Conflict and terrorism                          | 0 (0 to 0)       | 0 (0 to 0)       | NA                        |
| Poland      | Cyclist road injuries                           | 80 (56 to 111)   | 66 (47 to 92)    | -17.2% (-20.6% to -13.3%) |
| Poland      | Drowning                                        | 0 (0 to 1)       | 0 (0 to 1)       | -16.9% (-24.8% to -8.1%)  |
| Poland      | Environmental heat and cold exposure            | 2 (2 to 3)       | 1 (1 to 1)       | -64.1% (-72.4% to -53.4%) |
| Poland      | Executions and police conflict                  | 0 (0 to 0)       | 0 (0 to 0)       | NA                        |
| Poland      | Exposure to forces of nature                    | 0 (0 to 0)       | 0 (0 to 0)       | NA                        |
| Poland      | Falls                                           | 271 (212 to 354) | 305 (238 to 396) | 12.6% (9.2% to 16.2%)     |
| Poland      | Fire, heat, and hot substances                  | 4 (3 to 7)       | 4 (2 to 6)       | -13% (-16.6% to -9.4%)    |
| Poland      | Foreign body in eyes                            | 0 (0 to 0)       | 0 (0 to 0)       | 0.6% (0.2% to 1.1%)       |
| Poland      | Foreign body in other body part                 | 3 (1 to 6)       | 3 (1 to 6)       | -6% (-8.3% to -4%)        |
| Poland      | Motor vehicle road injuries                     | 125 (88 to 165)  | 108 (79 to 143)  | -13.2% (-16.9% to -9.2%)  |
| Poland      | Motorcyclist road injuries                      | 26 (19 to 36)    | 21 (15 to 29)    | -21.4% (-25.4% to -16.9%) |
| Poland      | Non-venomous animal contact                     | 7 (4 to 13)      | 6 (3 to 10)      | -22% (-23.7% to -20.4%)   |
| Poland      | Other exposure to mechanical forces             | 144 (89 to 227)  | 128 (78 to 201)  | -11% (-14.6% to -7.2%)    |
| Poland      | Other road injuries                             | 3 (2 to 5)       | 2 (1 to 3)       | -41.7% (-48% to -35.9%)   |
| Poland      | Other transport injuries                        | 10 (8 to 13)     | 7 (5 to 9)       | -31.6% (-35.5% to -27.9%) |
| Poland      | Other unintentional injuries                    | 46 (29 to 75)    | 29 (18 to 49)    | -36.6% (-42.1% to -32.2%) |
| Poland      | Pedestrian road injuries                        | 78 (58 to 99)    | 31 (22 to 40)    | -60.6% (-62.6% to -58.4%) |
| Poland      | Physical violence by firearm                    | 0 (0 to 0)       | 0 (0 to 1)       | 60.4% (45.6% to 75.3%)    |

|             |                                                 |                  |                  |                           |
|-------------|-------------------------------------------------|------------------|------------------|---------------------------|
| Poland      | Physical violence by other means                | 31 (22 to 44)    | 22 (15 to 31)    | -28.1% (-33% to -22.7%)   |
| Poland      | Physical violence by sharp object               | 3 (2 to 4)       | 2 (1 to 3)       | -34.6% (-44.6% to -25%)   |
| Poland      | Poisoning by carbon monoxide                    | 0 (0 to 0)       | 0 (0 to 0)       | -7% (-19.4% to 5.2%)      |
| Poland      | Poisoning by other means                        | 1 (0 to 1)       | 0 (0 to 1)       | -23.4% (-32.1% to -14%)   |
| Poland      | Pulmonary aspiration and foreign body in airway | 1 (1 to 2)       | 1 (1 to 2)       | -34% (-40.1% to -28.3%)   |
| Poland      | Self-harm by firearm                            | 0 (0 to 1)       | 1 (0 to 1)       | 12.1% (5.6% to 18.7%)     |
| Poland      | Self-harm by other specified means              | 4 (2 to 6)       | 4 (2 to 6)       | -1.4% (-4.2% to 1.3%)     |
| Poland      | Unintentional firearm injuries                  | 1 (1 to 2)       | 1 (1 to 2)       | 0.9% (-4% to 5.2%)        |
| Poland      | Venomous animal contact                         | 6 (3 to 11)      | 5 (2 to 9)       | -20.7% (-22.3% to -19.2%) |
| Portugal    | Adverse effects of medical treatment            | 0 (0 to 0)       | 0 (0 to 0)       | 0% (0% to 0%)             |
| Portugal    | Conflict and terrorism                          | 0 (0 to 0)       | 0 (0 to 0)       | NA                        |
| Portugal    | Cyclist road injuries                           | 31 (23 to 42)    | 15 (11 to 19)    | -53.1% (-60.2% to -45.6%) |
| Portugal    | Drowning                                        | 0 (0 to 0)       | 0 (0 to 0)       | 40.5% (21.8% to 61.2%)    |
| Portugal    | Environmental heat and cold exposure            | 2 (1 to 3)       | 2 (1 to 3)       | -3.3% (-7.6% to 1.7%)     |
| Portugal    | Executions and police conflict                  | 0 (0 to 0)       | 0 (0 to 0)       | NA                        |
| Portugal    | Exposure to forces of nature                    | 0 (0 to 0)       | 0 (0 to 0)       | NA                        |
| Portugal    | Falls                                           | 187 (146 to 242) | 159 (125 to 202) | -15.1% (-20.8% to -9%)    |
| Portugal    | Fire, heat, and hot substances                  | 2 (1 to 3)       | 2 (1 to 3)       | -16% (-22.7% to -9.4%)    |
| Portugal    | Foreign body in eyes                            | 0 (0 to 0)       | 0 (0 to 0)       | 0.3% (-3.9% to 5.9%)      |
| Portugal    | Foreign body in other body part                 | 2 (1 to 3)       | 2 (1 to 3)       | 4.3% (-2.1% to 11.1%)     |
| Portugal    | Motor vehicle road injuries                     | 34 (25 to 45)    | 14 (10 to 18)    | -59.9% (-66.4% to -53.3%) |
| Portugal    | Motorcyclist road injuries                      | 9 (6 to 12)      | 7 (5 to 9)       | -23.5% (-36.3% to -9.8%)  |
| Portugal    | Non-venomous animal contact                     | 2 (1 to 3)       | 2 (1 to 3)       | -7% (-12.1% to -0.3%)     |
| Portugal    | Other exposure to mechanical forces             | 50 (31 to 79)    | 36 (21 to 59)    | -28.5% (-37.2% to -19.2%) |
| Portugal    | Other road injuries                             | 2 (1 to 3)       | 1 (1 to 2)       | -40.4% (-50.3% to -30.3%) |
| Portugal    | Other transport injuries                        | 8 (6 to 10)      | 8 (6 to 10)      | -0.4% (-6.9% to 5.8%)     |
| Portugal    | Other unintentional injuries                    | 28 (18 to 43)    | 20 (13 to 32)    | -27.3% (-34.3% to -21%)   |
| Portugal    | Pedestrian road injuries                        | 31 (25 to 40)    | 5 (4 to 6)       | -84.3% (-87.1% to -80.9%) |
| Portugal    | Physical violence by firearm                    | 0 (0 to 1)       | 1 (0 to 1)       | 33% (12% to 58.2%)        |
| Portugal    | Physical violence by other means                | 22 (16 to 30)    | 13 (9 to 19)     | -39.2% (-45.6% to -31.5%) |
| Portugal    | Physical violence by sharp object               | 1 (1 to 2)       | 1 (1 to 2)       | -17.7% (-30.3% to -4.1%)  |
| Portugal    | Poisoning by carbon monoxide                    | 0 (0 to 0)       | 0 (0 to 0)       | 32.9% (21.6% to 45.6%)    |
| Portugal    | Poisoning by other means                        | 0 (0 to 0)       | 0 (0 to 0)       | -9.7% (-16.2% to -2.6%)   |
| Portugal    | Pulmonary aspiration and foreign body in airway | 1 (1 to 2)       | 1 (0 to 1)       | -27.6% (-35.5% to -19%)   |
| Portugal    | Self-harm by firearm                            | 0 (0 to 1)       | 0 (0 to 1)       | 3.3% (-10.4% to 19.1%)    |
| Portugal    | Self-harm by other specified means              | 3 (2 to 4)       | 2 (1 to 3)       | -34.1% (-38.5% to -29.6%) |
| Portugal    | Unintentional firearm injuries                  | 1 (1 to 2)       | 1 (1 to 2)       | -23.1% (-34.8% to -12.2%) |
| Portugal    | Venomous animal contact                         | 1 (1 to 3)       | 1 (1 to 2)       | -7.8% (-13% to -2%)       |
| Puerto Rico | Adverse effects of medical treatment            | 0 (0 to 0)       | 0 (0 to 0)       | 0% (0% to 0%)             |
| Puerto Rico | Conflict and terrorism                          | 0 (0 to 0)       | 0 (0 to 0)       | NA                        |
| Puerto Rico | Cyclist road injuries                           | 24 (15 to 35)    | 18 (11 to 27)    | -24.2% (-34% to -13.7%)   |
| Puerto Rico | Drowning                                        | 0 (0 to 0)       | 0 (0 to 0)       | 49.5% (31.8% to 70.2%)    |
| Puerto Rico | Environmental heat and cold exposure            | 1 (1 to 3)       | 1 (1 to 3)       | 5.1% (1% to 9.6%)         |



|             |                                                 |                  |                  |                           |
|-------------|-------------------------------------------------|------------------|------------------|---------------------------|
| Puerto Rico | Executions and police conflict                  | 0 (0 to 0)       | 0 (0 to 0)       | NA                        |
| Puerto Rico | Exposure to forces of nature                    | 0 (0 to 0)       | 0 (0 to 0)       | NA                        |
| Puerto Rico | Falls                                           | 42 (27 to 63)    | 56 (36 to 86)    | 34.5% (29.1% to 40.5%)    |
| Puerto Rico | Fire, heat, and hot substances                  | 1 (0 to 1)       | 1 (0 to 1)       | 4.8% (-1.6% to 10.9%)     |
| Puerto Rico | Foreign body in eyes                            | 0 (0 to 0)       | 0 (0 to 0)       | -0.1% (-0.3% to 0.1%)     |
| Puerto Rico | Foreign body in other body part                 | 2 (1 to 3)       | 2 (1 to 4)       | 7.9% (0.6% to 16%)        |
| Puerto Rico | Motor vehicle road injuries                     | 48 (33 to 67)    | 24 (16 to 35)    | -49.2% (-56.4% to -41.7%) |
| Puerto Rico | Motorcyclist road injuries                      | 20 (14 to 28)    | 26 (19 to 34)    | 28.3% (10.3% to 49.7%)    |
| Puerto Rico | Non-venomous animal contact                     | 2 (1 to 4)       | 2 (1 to 3)       | -8.9% (-14% to -3.7%)     |
| Puerto Rico | Other exposure to mechanical forces             | 53 (26 to 99)    | 61 (31 to 113)   | 15.3% (8.8% to 20.9%)     |
| Puerto Rico | Other road injuries                             | 6 (3 to 11)      | 5 (2 to 9)       | -17.5% (-28% to -5.3%)    |
| Puerto Rico | Other transport injuries                        | 3 (2 to 4)       | 3 (2 to 4)       | -5.6% (-13% to 2.2%)      |
| Puerto Rico | Other unintentional injuries                    | 5 (3 to 9)       | 5 (3 to 9)       | -5.5% (-12.8% to 0.5%)    |
| Puerto Rico | Pedestrian road injuries                        | 34 (25 to 46)    | 17 (12 to 24)    | -48.6% (-55.1% to -41.6%) |
| Puerto Rico | Physical violence by firearm                    | 7 (5 to 11)      | 10 (6 to 15)     | 30.9% (5.5% to 62.9%)     |
| Puerto Rico | Physical violence by other means                | 18 (11 to 28)    | 16 (9 to 25)     | -11.2% (-22.6% to 2.2%)   |
| Puerto Rico | Physical violence by sharp object               | 5 (3 to 10)      | 4 (2 to 8)       | -18.7% (-31.7% to -4.6%)  |
| Puerto Rico | Poisoning by carbon monoxide                    | 0 (0 to 0)       | 0 (0 to 0)       | -27.3% (-43% to -13.5%)   |
| Puerto Rico | Poisoning by other means                        | 0 (0 to 0)       | 0 (0 to 0)       | -58.2% (-67% to -47.7%)   |
| Puerto Rico | Pulmonary aspiration and foreign body in airway | 0 (0 to 0)       | 0 (0 to 0)       | -17.3% (-25.4% to -7.7%)  |
| Puerto Rico | Self-harm by firearm                            | 0 (0 to 0)       | 0 (0 to 0)       | -31.8% (-37.7% to -26.1%) |
| Puerto Rico | Self-harm by other specified means              | 0 (0 to 0)       | 0 (0 to 0)       | -17.8% (-27.3% to -8%)    |
| Puerto Rico | Unintentional firearm injuries                  | 2 (1 to 4)       | 2 (1 to 5)       | 13.8% (2.3% to 25.9%)     |
| Puerto Rico | Venomous animal contact                         | 1 (0 to 3)       | 1 (0 to 3)       | -8.5% (-14% to -2.5%)     |
| Qatar       | Adverse effects of medical treatment            | 0 (0 to 0)       | 0 (0 to 0)       | 0% (0% to 0%)             |
| Qatar       | Conflict and terrorism                          | 0 (0 to 0)       | 0 (0 to 0)       | NA                        |
| Qatar       | Cyclist road injuries                           | 28 (20 to 39)    | 18 (13 to 25)    | -36.6% (-43.3% to -28.7%) |
| Qatar       | Drowning                                        | 0 (0 to 0)       | 0 (0 to 1)       | 63.7% (39.1% to 91.9%)    |
| Qatar       | Environmental heat and cold exposure            | 4 (3 to 6)       | 4 (3 to 6)       | -4.6% (-10.9% to 0.7%)    |
| Qatar       | Executions and police conflict                  | 0 (0 to 0)       | 0 (0 to 0)       | NA                        |
| Qatar       | Exposure to forces of nature                    | 0 (0 to 0)       | 0 (0 to 0)       | NA                        |
| Qatar       | Falls                                           | 141 (109 to 185) | 173 (133 to 228) | 22.1% (16.1% to 28.6%)    |
| Qatar       | Fire, heat, and hot substances                  | 1 (1 to 2)       | 1 (0 to 1)       | -35.7% (-42.5% to -27.8%) |
| Qatar       | Foreign body in eyes                            | 0 (0 to 0)       | 0 (0 to 0)       | 4.2% (1.9% to 7.2%)       |
| Qatar       | Foreign body in other body part                 | 1 (1 to 3)       | 1 (1 to 3)       | -0.4% (-5% to 4.2%)       |
| Qatar       | Motor vehicle road injuries                     | 79 (61 to 99)    | 53 (42 to 67)    | -32.3% (-38.3% to -25.5%) |
| Qatar       | Motorcyclist road injuries                      | 13 (10 to 17)    | 9 (7 to 12)      | -29% (-37.1% to -19.5%)   |
| Qatar       | Non-venomous animal contact                     | 2 (1 to 4)       | 2 (1 to 4)       | -0.5% (-6.1% to 6.3%)     |
| Qatar       | Other exposure to mechanical forces             | 48 (30 to 74)    | 37 (23 to 56)    | -23.7% (-29.7% to -18%)   |
| Qatar       | Other road injuries                             | 2 (1 to 4)       | 2 (1 to 3)       | -14.7% (-24.5% to -3%)    |
| Qatar       | Other transport injuries                        | 10 (8 to 13)     | 7 (6 to 9)       | -26.5% (-33.2% to -19.5%) |
| Qatar       | Other unintentional injuries                    | 21 (14 to 35)    | 18 (12 to 30)    | -13.6% (-19.4% to -7.2%)  |
| Qatar       | Pedestrian road injuries                        | 43 (33 to 54)    | 26 (20 to 33)    | -38.4% (-44.4% to -31.6%) |

|                     |                                                 |                  |                  |                           |
|---------------------|-------------------------------------------------|------------------|------------------|---------------------------|
| Qatar               | Physical violence by firearm                    | 0 (0 to 0)       | 1 (0 to 1)       | 161.8% (124.2% to 200.8%) |
| Qatar               | Physical violence by other means                | 12 (9 to 17)     | 13 (9 to 19)     | 6.3% (-0.2% to 12.7%)     |
| Qatar               | Physical violence by sharp object               | 2 (1 to 3)       | 2 (1 to 3)       | 19.7% (8% to 36.5%)       |
| Qatar               | Poisoning by carbon monoxide                    | 0 (0 to 0)       | 0 (0 to 0)       | 35% (22.6% to 49.8%)      |
| Qatar               | Poisoning by other means                        | 0 (0 to 0)       | 0 (0 to 0)       | -10.6% (-17.3% to -3.4%)  |
| Qatar               | Pulmonary aspiration and foreign body in airway | 0 (0 to 1)       | 0 (0 to 1)       | -20.1% (-30.8% to -6.9%)  |
| Qatar               | Self-harm by firearm                            | 0 (0 to 0)       | 0 (0 to 0)       | 42.6% (20.8% to 68.2%)    |
| Qatar               | Self-harm by other specified means              | 1 (1 to 2)       | 1 (1 to 2)       | -1.8% (-9.6% to 5.9%)     |
| Qatar               | Unintentional firearm injuries                  | 2 (1 to 3)       | 2 (1 to 3)       | 1.5% (-8.1% to 13.1%)     |
| Qatar               | Venomous animal contact                         | 1 (0 to 2)       | 1 (0 to 2)       | -1.9% (-8.3% to 5.7%)     |
| Republic of Korea   | Adverse effects of medical treatment            | 0 (0 to 0)       | 0 (0 to 0)       | 0% (0% to 0%)             |
| Republic of Korea   | Conflict and terrorism                          | 0 (0 to 1)       | 0 (0 to 0)       | NA                        |
| Republic of Korea   | Cyclist road injuries                           | 34 (25 to 45)    | 19 (14 to 26)    | -43.1% (-50.7% to -34.2%) |
| Republic of Korea   | Drowning                                        | 0 (0 to 0)       | 1 (0 to 1)       | 129.8% (98.6% to 164.4%)  |
| Republic of Korea   | Environmental heat and cold exposure            | 4 (3 to 5)       | 3 (2 to 5)       | -8.2% (-13.7% to -3%)     |
| Republic of Korea   | Executions and police conflict                  | 0 (0 to 0)       | 0 (0 to 0)       | NA                        |
| Republic of Korea   | Exposure to forces of nature                    | 0 (0 to 1)       | 0 (0 to 0)       | NA                        |
| Republic of Korea   | Falls                                           | 205 (160 to 262) | 223 (175 to 284) | 8.9% (2.4% to 15.9%)      |
| Republic of Korea   | Fire, heat, and hot substances                  | 4 (2 to 6)       | 3 (2 to 5)       | -16.3% (-25.6% to -7.6%)  |
| Republic of Korea   | Foreign body in eyes                            | 0 (0 to 0)       | 0 (0 to 0)       | 1.3% (0.4% to 2.7%)       |
| Republic of Korea   | Foreign body in other body part                 | 2 (1 to 5)       | 3 (1 to 5)       | 9.1% (4.2% to 13.7%)      |
| Republic of Korea   | Motor vehicle road injuries                     | 47 (36 to 60)    | 25 (18 to 32)    | -46.5% (-53.4% to -38.5%) |
| Republic of Korea   | Motorcyclist road injuries                      | 24 (19 to 31)    | 12 (9 to 16)     | -50.3% (-57.5% to -41.8%) |
| Republic of Korea   | Non-venomous animal contact                     | 6 (3 to 11)      | 6 (3 to 10)      | -6.5% (-11.2% to -1.5%)   |
| Republic of Korea   | Other exposure to mechanical forces             | 72 (45 to 114)   | 73 (44 to 116)   | 0.7% (-8.8% to 9.7%)      |
| Republic of Korea   | Other road injuries                             | 2 (1 to 3)       | 1 (1 to 2)       | -32.4% (-44.2% to -18.9%) |
| Republic of Korea   | Other transport injuries                        | 10 (8 to 12)     | 7 (6 to 10)      | -24% (-32.7% to -13.3%)   |
| Republic of Korea   | Other unintentional injuries                    | 47 (32 to 74)    | 34 (22 to 55)    | -27.8% (-35.9% to -20%)   |
| Republic of Korea   | Pedestrian road injuries                        | 27 (21 to 34)    | 11 (8 to 14)     | -59.5% (-64% to -54.2%)   |
| Republic of Korea   | Physical violence by firearm                    | 0 (0 to 0)       | 1 (0 to 1)       | 106.4% (81.9% to 139.1%)  |
| Republic of Korea   | Physical violence by other means                | 15 (10 to 21)    | 13 (9 to 19)     | -12.8% (-20.9% to -3.6%)  |
| Republic of Korea   | Physical violence by sharp object               | 2 (1 to 3)       | 1 (1 to 2)       | -35% (-46% to -24.1%)     |
| Republic of Korea   | Poisoning by carbon monoxide                    | 0 (0 to 0)       | 0 (0 to 0)       | -27% (-39.8% to -11.9%)   |
| Republic of Korea   | Poisoning by other means                        | 0 (0 to 1)       | 0 (0 to 1)       | -22.6% (-33.1% to -12.1%) |
| Republic of Korea   | Pulmonary aspiration and foreign body in airway | 1 (0 to 1)       | 0 (0 to 1)       | -41.6% (-48.8% to -34.5%) |
| Republic of Korea   | Self-harm by firearm                            | 0 (0 to 0)       | 0 (0 to 1)       | 69.3% (33.8% to 110.6%)   |
| Republic of Korea   | Self-harm by other specified means              | 3 (2 to 5)       | 6 (4 to 9)       | 77.1% (63.8% to 91.3%)    |
| Republic of Korea   | Unintentional firearm injuries                  | 1 (1 to 2)       | 1 (1 to 2)       | 22.4% (8.1% to 37%)       |
| Republic of Korea   | Venomous animal contact                         | 3 (1 to 6)       | 3 (1 to 5)       | -13.9% (-19.5% to -8.9%)  |
| Republic of Moldova | Adverse effects of medical treatment            | 0 (0 to 0)       | 0 (0 to 0)       | 0% (0% to 0%)             |
| Republic of Moldova | Conflict and terrorism                          | 0 (0 to 0)       | 0 (0 to 0)       | NA                        |
| Republic of Moldova | Cyclist road injuries                           | 65 (46 to 87)    | 41 (29 to 57)    | -36.1% (-42.9% to -28.1%) |
| Republic of Moldova | Drowning                                        | 1 (0 to 1)       | 1 (0 to 1)       | 10.5% (0.7% to 22%)       |

|                     |                                                 |                  |                  |                           |
|---------------------|-------------------------------------------------|------------------|------------------|---------------------------|
| Republic of Moldova | Environmental heat and cold exposure            | 10 (7 to 14)     | 11 (8 to 15)     | 12.3% (3.9% to 21.6%)     |
| Republic of Moldova | Executions and police conflict                  | 0 (0 to 0)       | 0 (0 to 0)       | NA                        |
| Republic of Moldova | Exposure to forces of nature                    | 0 (0 to 0)       | 0 (0 to 0)       | NA                        |
| Republic of Moldova | Falls                                           | 220 (172 to 282) | 190 (146 to 248) | -13.6% (-18.6% to -7.7%)  |
| Republic of Moldova | Fire, heat, and hot substances                  | 4 (2 to 7)       | 3 (2 to 5)       | -21.3% (-29.6% to -13.8%) |
| Republic of Moldova | Foreign body in eyes                            | 0 (0 to 0)       | 0 (0 to 0)       | 1.2% (0.7% to 1.9%)       |
| Republic of Moldova | Foreign body in other body part                 | 2 (1 to 4)       | 2 (1 to 4)       | 1.3% (-3.8% to 7.2%)      |
| Republic of Moldova | Motor vehicle road injuries                     | 141 (109 to 176) | 98 (76 to 122)   | -30.7% (-38.8% to -22.1%) |
| Republic of Moldova | Motorcyclist road injuries                      | 23 (17 to 29)    | 11 (8 to 15)     | -49.3% (-57.7% to -40.1%) |
| Republic of Moldova | Non-venomous animal contact                     | 5 (3 to 8)       | 5 (3 to 8)       | 0.3% (-4.5% to 5.2%)      |
| Republic of Moldova | Other exposure to mechanical forces             | 83 (52 to 133)   | 69 (41 to 110)   | -17.5% (-25.8% to -9.5%)  |
| Republic of Moldova | Other road injuries                             | 4 (2 to 6)       | 2 (1 to 4)       | -39.8% (-47.4% to -31.2%) |
| Republic of Moldova | Other transport injuries                        | 7 (5 to 8)       | 5 (4 to 7)       | -18.2% (-24.9% to -11.3%) |
| Republic of Moldova | Other unintentional injuries                    | 41 (26 to 65)    | 24 (15 to 39)    | -40.8% (-47.2% to -33.1%) |
| Republic of Moldova | Pedestrian road injuries                        | 79 (62 to 99)    | 35 (27 to 45)    | -55.4% (-60.5% to -50.1%) |
| Republic of Moldova | Physical violence by firearm                    | 0 (0 to 0)       | 0 (0 to 0)       | 18.6% (-7.6% to 47.6%)    |
| Republic of Moldova | Physical violence by other means                | 42 (30 to 59)    | 24 (17 to 33)    | -43% (-50.2% to -33.6%)   |
| Republic of Moldova | Physical violence by sharp object               | 5 (3 to 7)       | 3 (2 to 6)       | -24.6% (-38.4% to -10.7%) |
| Republic of Moldova | Poisoning by carbon monoxide                    | 0 (0 to 0)       | 0 (0 to 0)       | -2.9% (-11.8% to 6.9%)    |
| Republic of Moldova | Poisoning by other means                        | 0 (0 to 1)       | 0 (0 to 1)       | -27.1% (-35.2% to -18.9%) |
| Republic of Moldova | Pulmonary aspiration and foreign body in airway | 1 (1 to 2)       | 1 (1 to 2)       | -5.1% (-11.6% to 2.9%)    |
| Republic of Moldova | Self-harm by firearm                            | 1 (0 to 1)       | 1 (0 to 1)       | 0.6% (-13.7% to 16.7%)    |
| Republic of Moldova | Self-harm by other specified means              | 3 (2 to 5)       | 3 (2 to 4)       | -11.2% (-16.3% to -5.5%)  |
| Republic of Moldova | Unintentional firearm injuries                  | 1 (1 to 2)       | 1 (0 to 2)       | -18.6% (-29.9% to -6.3%)  |
| Republic of Moldova | Venomous animal contact                         | 4 (2 to 7)       | 4 (2 to 7)       | 4.7% (-0.5% to 10.8%)     |
| Romania             | Adverse effects of medical treatment            | 0 (0 to 0)       | 0 (0 to 0)       | 0% (0% to 0%)             |
| Romania             | Conflict and terrorism                          | 2 (1 to 5)       | 0 (0 to 0)       | NA                        |
| Romania             | Cyclist road injuries                           | 58 (43 to 77)    | 49 (36 to 65)    | -16.2% (-25.2% to -5.3%)  |
| Romania             | Drowning                                        | 0 (0 to 1)       | 0 (0 to 1)       | 24.8% (9.7% to 40.2%)     |
| Romania             | Environmental heat and cold exposure            | 3 (2 to 4)       | 2 (2 to 3)       | -17.3% (-21.9% to -12.8%) |
| Romania             | Executions and police conflict                  | 0 (0 to 0)       | 0 (0 to 0)       | NA                        |
| Romania             | Exposure to forces of nature                    | 0 (0 to 0)       | 0 (0 to 0)       | NA                        |
| Romania             | Falls                                           | 307 (240 to 402) | 268 (206 to 352) | -12.7% (-18.5% to -6.1%)  |
| Romania             | Fire, heat, and hot substances                  | 5 (3 to 9)       | 4 (2 to 6)       | -24.8% (-30.5% to -19.7%) |
| Romania             | Foreign body in eyes                            | 0 (0 to 0)       | 0 (0 to 0)       | 0.3% (0.1% to 0.6%)       |
| Romania             | Foreign body in other body part                 | 2 (1 to 5)       | 2 (1 to 5)       | 1.1% (-4% to 7.5%)        |
| Romania             | Motor vehicle road injuries                     | 95 (74 to 119)   | 79 (61 to 100)   | -16.6% (-25.3% to -6.5%)  |
| Romania             | Motorcyclist road injuries                      | 15 (11 to 20)    | 12 (9 to 16)     | -21.7% (-33% to -8.2%)    |
| Romania             | Non-venomous animal contact                     | 7 (4 to 12)      | 6 (3 to 10)      | -13.9% (-18.5% to -9.3%)  |
| Romania             | Other exposure to mechanical forces             | 160 (102 to 248) | 140 (88 to 219)  | -12.4% (-18.9% to -5%)    |
| Romania             | Other road injuries                             | 2 (1 to 3)       | 1 (1 to 2)       | -28.6% (-37.3% to -19.6%) |
| Romania             | Other transport injuries                        | 8 (6 to 10)      | 7 (5 to 9)       | -11.8% (-17.3% to -6.4%)  |
| Romania             | Other unintentional injuries                    | 35 (22 to 55)    | 29 (18 to 47)    | -16.4% (-23.9% to -8.6%)  |

|                    |                                                 |                  |                  |                           |
|--------------------|-------------------------------------------------|------------------|------------------|---------------------------|
| Romania            | Pedestrian road injuries                        | 48 (38 to 60)    | 25 (19 to 32)    | -47.7% (-53.8% to -40.4%) |
| Romania            | Physical violence by firearm                    | 0 (0 to 0)       | 0 (0 to 1)       | 105.3% (79.4% to 134.1%)  |
| Romania            | Physical violence by other means                | 36 (25 to 49)    | 24 (17 to 34)    | -32.1% (-40.8% to -21.9%) |
| Romania            | Physical violence by sharp object               | 3 (2 to 5)       | 2 (1 to 3)       | -33.8% (-46.2% to -22.1%) |
| Romania            | Poisoning by carbon monoxide                    | 0 (0 to 0)       | 0 (0 to 0)       | -6.4% (-21.7% to 11%)     |
| Romania            | Poisoning by other means                        | 1 (1 to 1)       | 0 (0 to 1)       | -50.4% (-60% to -41.2%)   |
| Romania            | Pulmonary aspiration and foreign body in airway | 1 (1 to 2)       | 1 (1 to 2)       | -22.1% (-30.4% to -14.1%) |
| Romania            | Self-harm by firearm                            | 0 (0 to 0)       | 0 (0 to 1)       | 43.5% (21.7% to 71.2%)    |
| Romania            | Self-harm by other specified means              | 2 (1 to 3)       | 2 (2 to 4)       | 11.5% (5.3% to 17.9%)     |
| Romania            | Unintentional firearm injuries                  | 1 (1 to 2)       | 1 (1 to 2)       | 1.9% (-9.7% to 13.5%)     |
| Romania            | Venomous animal contact                         | 5 (2 to 10)      | 4 (2 to 9)       | -17.2% (-21.8% to -12.7%) |
| Russian Federation | Adverse effects of medical treatment            | 0 (0 to 0)       | 0 (0 to 0)       | 0% (0% to 0%)             |
| Russian Federation | Conflict and terrorism                          | 1 (0 to 2)       | 0 (0 to 0)       | NA                        |
| Russian Federation | Cyclist road injuries                           | 69 (46 to 99)    | 57 (38 to 83)    | -17.6% (-21.5% to -13.7%) |
| Russian Federation | Drowning                                        | 1 (1 to 1)       | 0 (0 to 1)       | -52.3% (-54.3% to -50.3%) |
| Russian Federation | Environmental heat and cold exposure            | 21 (15 to 28)    | 11 (8 to 15)     | -46.1% (-49.7% to -41.8%) |
| Russian Federation | Executions and police conflict                  | 0 (0 to 0)       | 0 (0 to 0)       | NA                        |
| Russian Federation | Exposure to forces of nature                    | 0 (0 to 0)       | 0 (0 to 0)       | NA                        |
| Russian Federation | Falls                                           | 243 (184 to 329) | 254 (193 to 343) | 4.1% (1.6% to 6.7%)       |
| Russian Federation | Fire, heat, and hot substances                  | 4 (3 to 7)       | 3 (2 to 5)       | -27.5% (-31.4% to -24.5%) |
| Russian Federation | Foreign body in eyes                            | 0 (0 to 0)       | 0 (0 to 0)       | 0.9% (0.4% to 1.7%)       |
| Russian Federation | Foreign body in other body part                 | 3 (1 to 5)       | 3 (1 to 5)       | -1% (-1.9% to 0.4%)       |
| Russian Federation | Motor vehicle road injuries                     | 202 (146 to 268) | 180 (132 to 238) | -11% (-14.3% to -7.3%)    |
| Russian Federation | Motorcyclist road injuries                      | 23 (15 to 32)    | 17 (12 to 25)    | -22.9% (-26.5% to -19.1%) |
| Russian Federation | Non-venomous animal contact                     | 5 (3 to 8)       | 4 (2 to 7)       | -13.2% (-16.1% to -10.9%) |
| Russian Federation | Other exposure to mechanical forces             | 124 (77 to 195)  | 80 (50 to 127)   | -35.1% (-38.1% to -31.9%) |
| Russian Federation | Other road injuries                             | 4 (2 to 6)       | 3 (2 to 6)       | -13.1% (-17.8% to -8.3%)  |
| Russian Federation | Other transport injuries                        | 8 (6 to 10)      | 7 (5 to 10)      | -6.8% (-8.6% to -5.1%)    |
| Russian Federation | Other unintentional injuries                    | 34 (22 to 56)    | 26 (16 to 42)    | -25.1% (-28.5% to -21.2%) |
| Russian Federation | Pedestrian road injuries                        | 124 (91 to 161)  | 54 (39 to 71)    | -56.3% (-58.2% to -54.5%) |
| Russian Federation | Physical violence by firearm                    | 0 (0 to 1)       | 0 (0 to 0)       | -15.7% (-25.9% to -5.8%)  |
| Russian Federation | Physical violence by other means                | 59 (41 to 86)    | 38 (27 to 55)    | -35.2% (-37% to -33%)     |
| Russian Federation | Physical violence by sharp object               | 6 (4 to 10)      | 3 (2 to 5)       | -46.2% (-50.8% to -41%)   |
| Russian Federation | Poisoning by carbon monoxide                    | 0 (0 to 0)       | 0 (0 to 0)       | -29.3% (-34% to -24.3%)   |
| Russian Federation | Poisoning by other means                        | 0 (0 to 1)       | 0 (0 to 0)       | -28.6% (-33.9% to -23.9%) |
| Russian Federation | Pulmonary aspiration and foreign body in airway | 1 (1 to 2)       | 1 (1 to 2)       | -9.8% (-13% to -6.1%)     |
| Russian Federation | Self-harm by firearm                            | 2 (1 to 3)       | 1 (1 to 2)       | -32.9% (-36.2% to -29.9%) |
| Russian Federation | Self-harm by other specified means              | 7 (4 to 11)      | 6 (4 to 9)       | -19.1% (-21.3% to -16.7%) |
| Russian Federation | Unintentional firearm injuries                  | 1 (1 to 2)       | 1 (1 to 2)       | -24.6% (-31.1% to -18.7%) |
| Russian Federation | Venomous animal contact                         | 4 (2 to 7)       | 3 (1 to 6)       | -8.9% (-11.6% to -6.5%)   |
| Rwanda             | Adverse effects of medical treatment            | 0 (0 to 0)       | 0 (0 to 0)       | 0% (0% to 0%)             |
| Rwanda             | Conflict and terrorism                          | 167 (51 to 429)  | 0 (0 to 0)       | NA                        |
| Rwanda             | Cyclist road injuries                           | 66 (45 to 96)    | 47 (32 to 68)    | -29.6% (-35.1% to -23.6%) |

|                       |                                                 |                |                |                           |
|-----------------------|-------------------------------------------------|----------------|----------------|---------------------------|
| Rwanda                | Drowning                                        | 0 (0 to 0)     | 0 (0 to 0)     | -22.8% (-30.1% to -12.9%) |
| Rwanda                | Environmental heat and cold exposure            | 0 (0 to 1)     | 0 (0 to 1)     | -9.8% (-17% to -2.8%)     |
| Rwanda                | Executions and police conflict                  | 0 (0 to 0)     | 0 (0 to 0)     | NA                        |
| Rwanda                | Exposure to forces of nature                    | 0 (0 to 0)     | 0 (0 to 0)     | NA                        |
| Rwanda                | Falls                                           | 23 (15 to 36)  | 28 (18 to 44)  | 21.6% (16.3% to 27%)      |
| Rwanda                | Fire, heat, and hot substances                  | 0 (0 to 1)     | 0 (0 to 1)     | -24.1% (-30.9% to -17.6%) |
| Rwanda                | Foreign body in eyes                            | 0 (0 to 0)     | 0 (0 to 0)     | -0.4% (-1.2% to 0%)       |
| Rwanda                | Foreign body in other body part                 | 3 (1 to 7)     | 3 (1 to 7)     | 0% (-5.8% to 7.1%)        |
| Rwanda                | Motor vehicle road injuries                     | 35 (22 to 52)  | 28 (18 to 41)  | -19.9% (-27.1% to -11%)   |
| Rwanda                | Motorcyclist road injuries                      | 52 (38 to 71)  | 42 (31 to 57)  | -18.8% (-24.3% to -12.6%) |
| Rwanda                | Non-venomous animal contact                     | 6 (3 to 12)    | 5 (2 to 9)     | -22.7% (-27.7% to -17.1%) |
| Rwanda                | Other exposure to mechanical forces             | 26 (13 to 48)  | 24 (12 to 44)  | -8.1% (-15.7% to -0.4%)   |
| Rwanda                | Other road injuries                             | 2 (1 to 4)     | 2 (1 to 3)     | -7.7% (-15.7% to 1.4%)    |
| Rwanda                | Other transport injuries                        | 4 (3 to 6)     | 3 (2 to 4)     | -27.5% (-33.3% to -20.3%) |
| Rwanda                | Other unintentional injuries                    | 3 (2 to 5)     | 2 (1 to 4)     | -20.4% (-27.8% to -13%)   |
| Rwanda                | Pedestrian road injuries                        | 94 (68 to 126) | 65 (48 to 87)  | -30.3% (-34.9% to -25.3%) |
| Rwanda                | Physical violence by firearm                    | 0 (0 to 0)     | 0 (0 to 0)     | 13% (-5.5% to 33.6%)      |
| Rwanda                | Physical violence by other means                | 7 (5 to 11)    | 5 (3 to 8)     | -28.7% (-33.8% to -22.8%) |
| Rwanda                | Physical violence by sharp object               | 2 (1 to 3)     | 1 (1 to 3)     | -17% (-24.8% to -8.6%)    |
| Rwanda                | Poisoning by carbon monoxide                    | 0 (0 to 0)     | 0 (0 to 0)     | 13.7% (-0.2% to 30.9%)    |
| Rwanda                | Poisoning by other means                        | 0 (0 to 0)     | 0 (0 to 0)     | -28.5% (-37.4% to -18.6%) |
| Rwanda                | Pulmonary aspiration and foreign body in airway | 0 (0 to 0)     | 0 (0 to 0)     | -17.5% (-27% to -7%)      |
| Rwanda                | Self-harm by firearm                            | 0 (0 to 0)     | 0 (0 to 0)     | -16.3% (-24% to -7.3%)    |
| Rwanda                | Self-harm by other specified means              | 0 (0 to 0)     | 0 (0 to 0)     | -36.7% (-41.3% to -32.1%) |
| Rwanda                | Unintentional firearm injuries                  | 1 (0 to 2)     | 1 (0 to 2)     | -24.9% (-33.6% to -15.7%) |
| Rwanda                | Venomous animal contact                         | 1 (0 to 3)     | 1 (0 to 2)     | -26% (-34.8% to -17.4%)   |
| Saint Kitts and Nevis | Adverse effects of medical treatment            | 0 (0 to 0)     | 0 (0 to 0)     | 0% (0% to 0%)             |
| Saint Kitts and Nevis | Conflict and terrorism                          | 0 (0 to 0)     | 0 (0 to 0)     | NA                        |
| Saint Kitts and Nevis | Cyclist road injuries                           | 22 (14 to 32)  | 19 (12 to 28)  | -13.2% (-24.7% to -1.5%)  |
| Saint Kitts and Nevis | Drowning                                        | 0 (0 to 0)     | 0 (0 to 0)     | 11.6% (-0.7% to 25.2%)    |
| Saint Kitts and Nevis | Environmental heat and cold exposure            | 2 (1 to 3)     | 2 (1 to 3)     | 2.3% (-2.1% to 7.4%)      |
| Saint Kitts and Nevis | Executions and police conflict                  | 0 (0 to 0)     | 0 (0 to 0)     | NA                        |
| Saint Kitts and Nevis | Exposure to forces of nature                    | 0 (0 to 0)     | 0 (0 to 0)     | NA                        |
| Saint Kitts and Nevis | Falls                                           | 32 (21 to 47)  | 41 (27 to 62)  | 30.9% (25.7% to 36%)      |
| Saint Kitts and Nevis | Fire, heat, and hot substances                  | 1 (1 to 2)     | 1 (1 to 1)     | -32.7% (-38.6% to -26.6%) |
| Saint Kitts and Nevis | Foreign body in eyes                            | 0 (0 to 0)     | 0 (0 to 0)     | 0.8% (0% to 1.8%)         |
| Saint Kitts and Nevis | Foreign body in other body part                 | 2 (1 to 3)     | 2 (1 to 3)     | -1.6% (-7.7% to 6%)       |
| Saint Kitts and Nevis | Motor vehicle road injuries                     | 34 (23 to 48)  | 25 (17 to 35)  | -26.5% (-35.7% to -16.7%) |
| Saint Kitts and Nevis | Motorcyclist road injuries                      | 22 (16 to 30)  | 26 (18 to 36)  | 17.4% (3.3% to 34.1%)     |
| Saint Kitts and Nevis | Non-venomous animal contact                     | 2 (1 to 4)     | 2 (1 to 4)     | -10% (-14.9% to -4.6%)    |
| Saint Kitts and Nevis | Other exposure to mechanical forces             | 82 (42 to 147) | 86 (43 to 154) | 5% (-2.9% to 12.7%)       |
| Saint Kitts and Nevis | Other road injuries                             | 5 (3 to 9)     | 5 (3 to 9)     | 0% (-14% to 14.5%)        |
| Saint Kitts and Nevis | Other transport injuries                        | 3 (2 to 4)     | 3 (2 to 4)     | -1.6% (-8.3% to 6.2%)     |

|                                  |                                                 |               |               |                           |
|----------------------------------|-------------------------------------------------|---------------|---------------|---------------------------|
| Saint Kitts and Nevis            | Other unintentional injuries                    | 4 (2 to 8)    | 4 (2 to 8)    | -8.8% (-14.7% to -2.7%)   |
| Saint Kitts and Nevis            | Pedestrian road injuries                        | 22 (16 to 30) | 14 (10 to 20) | -36.5% (-44.8% to -27.9%) |
| Saint Kitts and Nevis            | Physical violence by firearm                    | 2 (1 to 2)    | 6 (3 to 9)    | 276.5% (204.1% to 366.2%) |
| Saint Kitts and Nevis            | Physical violence by other means                | 12 (8 to 19)  | 18 (11 to 28) | 42.9% (23.3% to 63%)      |
| Saint Kitts and Nevis            | Physical violence by sharp object               | 4 (2 to 7)    | 6 (3 to 11)   | 58.4% (32.4% to 86.2%)    |
| Saint Kitts and Nevis            | Poisoning by carbon monoxide                    | 0 (0 to 0)    | 0 (0 to 0)    | 18.3% (5.1% to 32%)       |
| Saint Kitts and Nevis            | Poisoning by other means                        | 0 (0 to 0)    | 0 (0 to 0)    | -1.8% (-13.6% to 8.6%)    |
| Saint Kitts and Nevis            | Pulmonary aspiration and foreign body in airway | 0 (0 to 0)    | 0 (0 to 0)    | -11.3% (-19.8% to -2.9%)  |
| Saint Kitts and Nevis            | Self-harm by firearm                            | 0 (0 to 0)    | 0 (0 to 0)    | 7.1% (-4.4% to 21.9%)     |
| Saint Kitts and Nevis            | Self-harm by other specified means              | 0 (0 to 0)    | 0 (0 to 0)    | -9.4% (-22.4% to 4.1%)    |
| Saint Kitts and Nevis            | Unintentional firearm injuries                  | 7 (3 to 14)   | 6 (2 to 12)   | -18.4% (-28.8% to -6.9%)  |
| Saint Kitts and Nevis            | Venomous animal contact                         | 2 (1 to 3)    | 1 (0 to 3)    | -10.2% (-15.7% to -4.3%)  |
| Saint Lucia                      | Adverse effects of medical treatment            | 0 (0 to 0)    | 0 (0 to 0)    | 0% (0% to 0%)             |
| Saint Lucia                      | Conflict and terrorism                          | 4 (2 to 9)    | 0 (0 to 0)    | NA                        |
| Saint Lucia                      | Cyclist road injuries                           | 35 (25 to 47) | 28 (20 to 38) | -20.9% (-29.5% to -11.1%) |
| Saint Lucia                      | Drowning                                        | 0 (0 to 1)    | 0 (0 to 1)    | 24.8% (11.3% to 40.6%)    |
| Saint Lucia                      | Environmental heat and cold exposure            | 10 (7 to 14)  | 11 (8 to 15)  | 5.5% (1.6% to 9.7%)       |
| Saint Lucia                      | Executions and police conflict                  | 0 (0 to 0)    | 0 (0 to 0)    | NA                        |
| Saint Lucia                      | Exposure to forces of nature                    | 0 (0 to 0)    | 0 (0 to 0)    | NA                        |
| Saint Lucia                      | Falls                                           | 43 (34 to 56) | 64 (49 to 83) | 47.2% (41.4% to 52.7%)    |
| Saint Lucia                      | Fire, heat, and hot substances                  | 4 (3 to 7)    | 4 (2 to 6)    | -11.7% (-18.3% to -5.1%)  |
| Saint Lucia                      | Foreign body in eyes                            | 0 (0 to 0)    | 0 (0 to 0)    | 1.4% (0.7% to 2.5%)       |
| Saint Lucia                      | Foreign body in other body part                 | 1 (1 to 2)    | 1 (1 to 2)    | 1% (-4.6% to 6.4%)        |
| Saint Lucia                      | Motor vehicle road injuries                     | 42 (32 to 54) | 32 (24 to 42) | -23.2% (-32% to -15.1%)   |
| Saint Lucia                      | Motorcyclist road injuries                      | 14 (11 to 19) | 19 (15 to 25) | 35.1% (18.2% to 56.1%)    |
| Saint Lucia                      | Non-venomous animal contact                     | 3 (2 to 5)    | 3 (2 to 5)    | -5.2% (-11% to 0.7%)      |
| Saint Lucia                      | Other exposure to mechanical forces             | 37 (22 to 61) | 46 (27 to 75) | 22.4% (16.1% to 29.7%)    |
| Saint Lucia                      | Other road injuries                             | 4 (2 to 7)    | 4 (2 to 6)    | -3.5% (-13.9% to 8.6%)    |
| Saint Lucia                      | Other transport injuries                        | 5 (4 to 7)    | 6 (4 to 8)    | 15.5% (7.8% to 23.6%)     |
| Saint Lucia                      | Other unintentional injuries                    | 15 (9 to 24)  | 14 (9 to 23)  | -5.3% (-10.7% to 0.2%)    |
| Saint Lucia                      | Pedestrian road injuries                        | 19 (15 to 24) | 13 (9 to 17)  | -33.8% (-41% to -25.7%)   |
| Saint Lucia                      | Physical violence by firearm                    | 1 (1 to 1)    | 3 (2 to 4)    | 235.6% (181.4% to 294.7%) |
| Saint Lucia                      | Physical violence by other means                | 12 (8 to 17)  | 15 (10 to 23) | 26.9% (15.3% to 38.6%)    |
| Saint Lucia                      | Physical violence by sharp object               | 6 (4 to 8)    | 8 (5 to 12)   | 39.1% (21.6% to 59.2%)    |
| Saint Lucia                      | Poisoning by carbon monoxide                    | 0 (0 to 0)    | 0 (0 to 0)    | 14.1% (1.2% to 28.2%)     |
| Saint Lucia                      | Poisoning by other means                        | 0 (0 to 0)    | 0 (0 to 0)    | -6.3% (-16.5% to 4.2%)    |
| Saint Lucia                      | Pulmonary aspiration and foreign body in airway | 1 (0 to 1)    | 0 (0 to 1)    | -19.7% (-26.8% to -12.4%) |
| Saint Lucia                      | Self-harm by firearm                            | 0 (0 to 0)    | 0 (0 to 0)    | 12.4% (-0.3% to 27.5%)    |
| Saint Lucia                      | Self-harm by other specified means              | 1 (0 to 1)    | 1 (0 to 1)    | -2.8% (-11.2% to 5.1%)    |
| Saint Lucia                      | Unintentional firearm injuries                  | 5 (3 to 7)    | 5 (3 to 8)    | 14.4% (4.2% to 25.2%)     |
| Saint Lucia                      | Venomous animal contact                         | 5 (2 to 9)    | 5 (2 to 9)    | -4% (-8.7% to 1.5%)       |
| Saint Vincent and the Grenadines | Adverse effects of medical treatment            | 0 (0 to 0)    | 0 (0 to 0)    | 0% (0% to 0%)             |
| Saint Vincent and the Grenadines | Conflict and terrorism                          | 0 (0 to 0)    | 0 (0 to 0)    | NA                        |



|                                  |                                                 |               |                |                           |
|----------------------------------|-------------------------------------------------|---------------|----------------|---------------------------|
| Saint Vincent and the Grenadines | Cyclist road injuries                           | 27 (19 to 36) | 23 (16 to 30)  | -15.1% (-22.6% to -6.7%)  |
| Saint Vincent and the Grenadines | Drowning                                        | 0 (0 to 1)    | 0 (0 to 1)     | 6% (-3.4% to 15.2%)       |
| Saint Vincent and the Grenadines | Environmental heat and cold exposure            | 11 (8 to 16)  | 12 (9 to 17)   | 5.2% (1.2% to 9.9%)       |
| Saint Vincent and the Grenadines | Executions and police conflict                  | 0 (0 to 0)    | 0 (0 to 0)     | NA                        |
| Saint Vincent and the Grenadines | Exposure to forces of nature                    | 0 (0 to 0)    | 0 (0 to 0)     | NA                        |
| Saint Vincent and the Grenadines | Falls                                           | 55 (43 to 71) | 80 (63 to 104) | 45.7% (40.1% to 50.9%)    |
| Saint Vincent and the Grenadines | Fire, heat, and hot substances                  | 5 (3 to 8)    | 4 (3 to 7)     | -17.9% (-24% to -11.3%)   |
| Saint Vincent and the Grenadines | Foreign body in eyes                            | 0 (0 to 0)    | 0 (0 to 0)     | 1.7% (0.7% to 3.3%)       |
| Saint Vincent and the Grenadines | Foreign body in other body part                 | 2 (1 to 4)    | 1 (1 to 3)     | -28.2% (-35% to -21.7%)   |
| Saint Vincent and the Grenadines | Motor vehicle road injuries                     | 19 (14 to 25) | 19 (14 to 24)  | -1.8% (-11.4% to 8.9%)    |
| Saint Vincent and the Grenadines | Motorcyclist road injuries                      | 10 (7 to 14)  | 12 (9 to 16)   | 21% (9.1% to 36.3%)       |
| Saint Vincent and the Grenadines | Non-venomous animal contact                     | 3 (2 to 6)    | 3 (2 to 6)     | -5.3% (-10.9% to 1%)      |
| Saint Vincent and the Grenadines | Other exposure to mechanical forces             | 39 (23 to 64) | 46 (28 to 76)  | 19.2% (11.3% to 28.1%)    |
| Saint Vincent and the Grenadines | Other road injuries                             | 3 (2 to 5)    | 3 (2 to 5)     | -4% (-13.8% to 6.5%)      |
| Saint Vincent and the Grenadines | Other transport injuries                        | 4 (3 to 6)    | 4 (3 to 6)     | 1.4% (-4.2% to 7.9%)      |
| Saint Vincent and the Grenadines | Other unintentional injuries                    | 13 (8 to 21)  | 13 (8 to 21)   | -3.2% (-8.2% to 2.1%)     |
| Saint Vincent and the Grenadines | Pedestrian road injuries                        | 19 (15 to 25) | 10 (8 to 13)   | -47.3% (-53.6% to -40.4%) |
| Saint Vincent and the Grenadines | Physical violence by firearm                    | 1 (1 to 1)    | 2 (1 to 3)     | 138.4% (101.8% to 185.5%) |
| Saint Vincent and the Grenadines | Physical violence by other means                | 15 (10 to 21) | 18 (12 to 26)  | 18.5% (4.5% to 32.2%)     |
| Saint Vincent and the Grenadines | Physical violence by sharp object               | 4 (2 to 6)    | 8 (5 to 12)    | 97.3% (69.8% to 132.5%)   |
| Saint Vincent and the Grenadines | Poisoning by carbon monoxide                    | 0 (0 to 0)    | 0 (0 to 0)     | 16.6% (2% to 30.7%)       |
| Saint Vincent and the Grenadines | Poisoning by other means                        | 0 (0 to 0)    | 0 (0 to 0)     | 3.9% (-6.9% to 13.6%)     |
| Saint Vincent and the Grenadines | Pulmonary aspiration and foreign body in airway | 1 (0 to 1)    | 0 (0 to 1)     | -16% (-23.4% to -8%)      |
| Saint Vincent and the Grenadines | Self-harm by firearm                            | 0 (0 to 0)    | 0 (0 to 0)     | 11.6% (-0.7% to 26.5%)    |
| Saint Vincent and the Grenadines | Self-harm by other specified means              | 0 (0 to 1)    | 0 (0 to 1)     | -12.4% (-19.7% to -5.3%)  |
| Saint Vincent and the Grenadines | Unintentional firearm injuries                  | 5 (3 to 8)    | 5 (3 to 8)     | -1.2% (-11.3% to 9.2%)    |
| Saint Vincent and the Grenadines | Venomous animal contact                         | 5 (3 to 10)   | 5 (2 to 9)     | -8.5% (-13.7% to -2.5%)   |
| Samoa                            | Adverse effects of medical treatment            | 0 (0 to 0)    | 0 (0 to 0)     | 0% (0% to 0%)             |
| Samoa                            | Conflict and terrorism                          | 0 (0 to 0)    | 0 (0 to 0)     | NA                        |
| Samoa                            | Cyclist road injuries                           | 14 (9 to 20)  | 14 (10 to 20)  | 2.2% (-4.8% to 10%)       |
| Samoa                            | Drowning                                        | 0 (0 to 1)    | 0 (0 to 1)     | 9.8% (1.7% to 19.7%)      |
| Samoa                            | Environmental heat and cold exposure            | 2 (2 to 3)    | 2 (2 to 3)     | 0% (-5.4% to 5%)          |
| Samoa                            | Executions and police conflict                  | 0 (0 to 0)    | 0 (0 to 0)     | NA                        |
| Samoa                            | Exposure to forces of nature                    | 28 (17 to 46) | 0 (0 to 0)     | NA                        |
| Samoa                            | Falls                                           | 52 (41 to 68) | 74 (58 to 97)  | 43.4% (38.2% to 48.8%)    |
| Samoa                            | Fire, heat, and hot substances                  | 1 (1 to 2)    | 1 (1 to 2)     | 6.8% (-0.5% to 14.5%)     |
| Samoa                            | Foreign body in eyes                            | 0 (0 to 0)    | 0 (0 to 0)     | -0.1% (-0.7% to 0.5%)     |
| Samoa                            | Foreign body in other body part                 | 1 (0 to 1)    | 1 (0 to 1)     | -2.3% (-8.4% to 3%)       |
| Samoa                            | Motor vehicle road injuries                     | 34 (26 to 43) | 33 (25 to 42)  | -4.1% (-10.7% to 3.3%)    |
| Samoa                            | Motorcyclist road injuries                      | 11 (8 to 14)  | 13 (9 to 17)   | 17.3% (7.7% to 28.4%)     |
| Samoa                            | Non-venomous animal contact                     | 5 (3 to 8)    | 4 (2 to 7)     | -14.9% (-19.5% to -10.6%) |
| Samoa                            | Other exposure to mechanical forces             | 13 (8 to 22)  | 12 (7 to 19)   | -11.7% (-17.6% to -6.4%)  |
| Samoa                            | Other road injuries                             | 2 (1 to 3)    | 2 (1 to 3)     | 1.6% (-7.6% to 12.9%)     |

|                       |                                                 |                |                 |                           |
|-----------------------|-------------------------------------------------|----------------|-----------------|---------------------------|
| Samoa                 | Other transport injuries                        | 6 (5 to 8)     | 6 (4 to 8)      | -5.7% (-10.5% to -0.8%)   |
| Samoa                 | Other unintentional injuries                    | 7 (4 to 10)    | 6 (4 to 10)     | -2.6% (-7.5% to 2.6%)     |
| Samoa                 | Pedestrian road injuries                        | 16 (12 to 20)  | 17 (13 to 22)   | 11.8% (3.1% to 20.8%)     |
| Samoa                 | Physical violence by firearm                    | 0 (0 to 0)     | 0 (0 to 0)      | 2.7% (-8.9% to 16.1%)     |
| Samoa                 | Physical violence by other means                | 35 (25 to 50)  | 35 (25 to 49)   | 0.2% (-5.9% to 6.8%)      |
| Samoa                 | Physical violence by sharp object               | 3 (2 to 5)     | 2 (2 to 4)      | -22.6% (-30.5% to -14.7%) |
| Samoa                 | Poisoning by carbon monoxide                    | 0 (0 to 0)     | 0 (0 to 0)      | 12.3% (1.8% to 24.1%)     |
| Samoa                 | Poisoning by other means                        | 0 (0 to 0)     | 0 (0 to 0)      | -12.4% (-18.8% to -5.9%)  |
| Samoa                 | Pulmonary aspiration and foreign body in airway | 0 (0 to 0)     | 0 (0 to 0)      | -7.3% (-16.7% to 3.4%)    |
| Samoa                 | Self-harm by firearm                            | 1 (0 to 1)     | 1 (0 to 1)      | -11.2% (-26% to 4.2%)     |
| Samoa                 | Self-harm by other specified means              | 3 (2 to 4)     | 3 (2 to 4)      | -5% (-11.2% to 1.6%)      |
| Samoa                 | Unintentional firearm injuries                  | 2 (1 to 3)     | 2 (1 to 3)      | -18% (-25.4% to -10.5%)   |
| Samoa                 | Venomous animal contact                         | 3 (1 to 6)     | 3 (1 to 5)      | -11% (-16.3% to -5.1%)    |
| San Marino            | Adverse effects of medical treatment            | 0 (0 to 0)     | 0 (0 to 0)      | 0% (0% to 0%)             |
| San Marino            | Conflict and terrorism                          | 0 (0 to 0)     | 0 (0 to 0)      | NA                        |
| San Marino            | Cyclist road injuries                           | 21 (14 to 31)  | 15 (10 to 22)   | -29.2% (-35.8% to -21.7%) |
| San Marino            | Drowning                                        | 0 (0 to 0)     | 0 (0 to 0)      | 70.4% (57.6% to 85.2%)    |
| San Marino            | Environmental heat and cold exposure            | 0 (0 to 1)     | 0 (0 to 1)      | -1.2% (-6% to 4.8%)       |
| San Marino            | Executions and police conflict                  | 0 (0 to 0)     | 0 (0 to 0)      | NA                        |
| San Marino            | Exposure to forces of nature                    | 0 (0 to 0)     | 0 (0 to 0)      | NA                        |
| San Marino            | Falls                                           | 95 (59 to 147) | 116 (71 to 181) | 22.5% (18.2% to 26.9%)    |
| San Marino            | Fire, heat, and hot substances                  | 0 (0 to 1)     | 0 (0 to 1)      | 3.5% (-0.1% to 7.9%)      |
| San Marino            | Foreign body in eyes                            | 0 (0 to 0)     | 0 (0 to 0)      | -0.6% (-1.6% to -0.1%)    |
| San Marino            | Foreign body in other body part                 | 2 (1 to 4)     | 2 (1 to 4)      | 0.4% (-4.5% to 6.4%)      |
| San Marino            | Motor vehicle road injuries                     | 33 (23 to 47)  | 24 (17 to 35)   | -25.9% (-32.6% to -18.8%) |
| San Marino            | Motorcyclist road injuries                      | 29 (21 to 38)  | 23 (17 to 31)   | -20.8% (-28.3% to -12.7%) |
| San Marino            | Non-venomous animal contact                     | 1 (1 to 2)     | 1 (0 to 2)      | -4% (-8.2% to 0.2%)       |
| San Marino            | Other exposure to mechanical forces             | 85 (44 to 157) | 78 (39 to 143)  | -8% (-12.7% to -2.9%)     |
| San Marino            | Other road injuries                             | 5 (2 to 8)     | 4 (2 to 8)      | -5.2% (-14.9% to 7%)      |
| San Marino            | Other transport injuries                        | 2 (1 to 3)     | 2 (2 to 3)      | 7.2% (2.1% to 12.5%)      |
| San Marino            | Other unintentional injuries                    | 8 (4 to 14)    | 7 (4 to 13)     | -8.2% (-12.8% to -4.5%)   |
| San Marino            | Pedestrian road injuries                        | 9 (6 to 12)    | 6 (4 to 9)      | -26.2% (-32.5% to -19%)   |
| San Marino            | Physical violence by firearm                    | 0 (0 to 1)     | 1 (0 to 1)      | 25.4% (15.5% to 36.5%)    |
| San Marino            | Physical violence by other means                | 12 (8 to 19)   | 12 (8 to 19)    | 1.7% (-3.1% to 7.1%)      |
| San Marino            | Physical violence by sharp object               | 1 (0 to 2)     | 1 (0 to 2)      | -0.4% (-9.1% to 8.1%)     |
| San Marino            | Poisoning by carbon monoxide                    | 0 (0 to 0)     | 0 (0 to 0)      | 25% (16.3% to 35.3%)      |
| San Marino            | Poisoning by other means                        | 0 (0 to 0)     | 0 (0 to 0)      | -14.1% (-18.2% to -8.9%)  |
| San Marino            | Pulmonary aspiration and foreign body in airway | 0 (0 to 0)     | 0 (0 to 0)      | -3.7% (-10.8% to 4.3%)    |
| San Marino            | Self-harm by firearm                            | 0 (0 to 0)     | 0 (0 to 0)      | -9.2% (-15.8% to -2.8%)   |
| San Marino            | Self-harm by other specified means              | 0 (0 to 0)     | 0 (0 to 0)      | 0.5% (-5.4% to 5.8%)      |
| San Marino            | Unintentional firearm injuries                  | 0 (0 to 1)     | 0 (0 to 1)      | 6.5% (-2% to 14.7%)       |
| San Marino            | Venomous animal contact                         | 0 (0 to 1)     | 0 (0 to 1)      | -5.4% (-12.5% to 2%)      |
| Sao Tome and Principe | Adverse effects of medical treatment            | 0 (0 to 0)     | 0 (0 to 0)      | 0% (0% to 0%)             |

|                       |                                                 |                  |                  |                          |
|-----------------------|-------------------------------------------------|------------------|------------------|--------------------------|
| Sao Tome and Principe | Conflict and terrorism                          | 0 (0 to 0)       | 0 (0 to 0)       | NA                       |
| Sao Tome and Principe | Cyclist road injuries                           | 22 (13 to 32)    | 27 (17 to 39)    | 22% (12.6% to 32.7%)     |
| Sao Tome and Principe | Drowning                                        | 0 (0 to 0)       | 0 (0 to 0)       | 14% (5.5% to 25.2%)      |
| Sao Tome and Principe | Environmental heat and cold exposure            | 0 (0 to 1)       | 0 (0 to 1)       | 3.6% (-2% to 9.6%)       |
| Sao Tome and Principe | Executions and police conflict                  | 0 (0 to 0)       | 0 (0 to 0)       | NA                       |
| Sao Tome and Principe | Exposure to forces of nature                    | 0 (0 to 0)       | 0 (0 to 0)       | NA                       |
| Sao Tome and Principe | Falls                                           | 31 (21 to 47)    | 41 (27 to 61)    | 30.7% (25.2% to 36.6%)   |
| Sao Tome and Principe | Fire, heat, and hot substances                  | 0 (0 to 0)       | 0 (0 to 0)       | 6.3% (0.7% to 12.2%)     |
| Sao Tome and Principe | Foreign body in eyes                            | 0 (0 to 0)       | 0 (0 to 0)       | 0.7% (0% to 1.8%)        |
| Sao Tome and Principe | Foreign body in other body part                 | 3 (1 to 8)       | 3 (1 to 7)       | -1.8% (-6.9% to 3.7%)    |
| Sao Tome and Principe | Motor vehicle road injuries                     | 42 (29 to 58)    | 54 (38 to 74)    | 28.9% (20% to 38.6%)     |
| Sao Tome and Principe | Motorcyclist road injuries                      | 18 (12 to 25)    | 22 (15 to 31)    | 23.7% (14.3% to 33.9%)   |
| Sao Tome and Principe | Non-venomous animal contact                     | 3 (1 to 6)       | 3 (1 to 6)       | 2.1% (-2.1% to 6.9%)     |
| Sao Tome and Principe | Other exposure to mechanical forces             | 28 (14 to 50)    | 26 (13 to 46)    | -8.2% (-15.1% to -1.5%)  |
| Sao Tome and Principe | Other road injuries                             | 2 (1 to 4)       | 2 (1 to 4)       | 12.7% (4% to 22.9%)      |
| Sao Tome and Principe | Other transport injuries                        | 3 (2 to 4)       | 3 (2 to 4)       | 1.8% (-5.1% to 8.5%)     |
| Sao Tome and Principe | Other unintentional injuries                    | 3 (2 to 5)       | 3 (1 to 5)       | -7.9% (-14.9% to -1.1%)  |
| Sao Tome and Principe | Pedestrian road injuries                        | 44 (32 to 58)    | 51 (37 to 67)    | 17.1% (9.6% to 25.2%)    |
| Sao Tome and Principe | Physical violence by firearm                    | 0 (0 to 0)       | 0 (0 to 0)       | 67.3% (47.7% to 92.3%)   |
| Sao Tome and Principe | Physical violence by other means                | 8 (5 to 12)      | 9 (6 to 13)      | 11.5% (5.3% to 18.8%)    |
| Sao Tome and Principe | Physical violence by sharp object               | 2 (1 to 4)       | 2 (1 to 4)       | 9% (0.5% to 18.4%)       |
| Sao Tome and Principe | Poisoning by carbon monoxide                    | 0 (0 to 0)       | 0 (0 to 0)       | 20.6% (8.6% to 34%)      |
| Sao Tome and Principe | Poisoning by other means                        | 0 (0 to 0)       | 0 (0 to 0)       | -8% (-15.3% to -0.8%)    |
| Sao Tome and Principe | Pulmonary aspiration and foreign body in airway | 0 (0 to 0)       | 0 (0 to 0)       | -5.5% (-16% to 6.4%)     |
| Sao Tome and Principe | Self-harm by firearm                            | 0 (0 to 0)       | 0 (0 to 0)       | 44.8% (35.7% to 55.9%)   |
| Sao Tome and Principe | Self-harm by other specified means              | 0 (0 to 0)       | 0 (0 to 0)       | 38.3% (29.5% to 48.5%)   |
| Sao Tome and Principe | Unintentional firearm injuries                  | 1 (0 to 2)       | 1 (0 to 2)       | -9.9% (-18.3% to -1.1%)  |
| Sao Tome and Principe | Venomous animal contact                         | 0 (0 to 1)       | 0 (0 to 1)       | 2.5% (-4.1% to 9.7%)     |
| Saudi Arabia          | Adverse effects of medical treatment            | 0 (0 to 0)       | 0 (0 to 0)       | 0% (0% to 0%)            |
| Saudi Arabia          | Conflict and terrorism                          | 0 (0 to 0)       | 0 (0 to 0)       | NA                       |
| Saudi Arabia          | Cyclist road injuries                           | 17 (11 to 25)    | 15 (10 to 22)    | -11% (-20% to -1.6%)     |
| Saudi Arabia          | Drowning                                        | 0 (0 to 0)       | 0 (0 to 1)       | 105.2% (82.2% to 130.2%) |
| Saudi Arabia          | Environmental heat and cold exposure            | 3 (2 to 5)       | 3 (2 to 5)       | 2.9% (-1.6% to 7.3%)     |
| Saudi Arabia          | Executions and police conflict                  | 0 (0 to 0)       | 0 (0 to 0)       | NA                       |
| Saudi Arabia          | Exposure to forces of nature                    | 0 (0 to 0)       | 0 (0 to 0)       | NA                       |
| Saudi Arabia          | Falls                                           | 235 (184 to 303) | 373 (292 to 477) | 58.7% (52.2% to 65.8%)   |
| Saudi Arabia          | Fire, heat, and hot substances                  | 1 (0 to 1)       | 1 (0 to 1)       | 0.6% (-5.9% to 7.5%)     |
| Saudi Arabia          | Foreign body in eyes                            | 0 (0 to 0)       | 0 (0 to 0)       | 0.4% (0% to 1%)          |
| Saudi Arabia          | Foreign body in other body part                 | 1 (1 to 3)       | 1 (1 to 3)       | -1.1% (-5.5% to 3%)      |
| Saudi Arabia          | Motor vehicle road injuries                     | 80 (64 to 101)   | 93 (74 to 117)   | 15.9% (6.1% to 25.5%)    |
| Saudi Arabia          | Motorcyclist road injuries                      | 12 (9 to 16)     | 15 (11 to 19)    | 21.4% (7% to 38%)        |
| Saudi Arabia          | Non-venomous animal contact                     | 2 (1 to 4)       | 2 (1 to 4)       | 0.1% (-5.2% to 6%)       |
| Saudi Arabia          | Other exposure to mechanical forces             | 40 (25 to 63)    | 35 (21 to 54)    | -12.8% (-18.2% to -6.6%) |

|              |                                                 |               |               |                           |
|--------------|-------------------------------------------------|---------------|---------------|---------------------------|
| Saudi Arabia | Other road injuries                             | 2 (1 to 4)    | 2 (1 to 4)    | -0.1% (-11.3% to 12.1%)   |
| Saudi Arabia | Other transport injuries                        | 5 (4 to 7)    | 6 (4 to 8)    | 9.6% (3.1% to 17.7%)      |
| Saudi Arabia | Other unintentional injuries                    | 48 (31 to 75) | 31 (21 to 50) | -33.9% (-38% to -29.4%)   |
| Saudi Arabia | Pedestrian road injuries                        | 35 (26 to 44) | 31 (24 to 40) | -10.6% (-19% to -1.1%)    |
| Saudi Arabia | Physical violence by firearm                    | 0 (0 to 0)    | 1 (0 to 1)    | 112.5% (79.9% to 150.3%)  |
| Saudi Arabia | Physical violence by other means                | 10 (7 to 14)  | 11 (8 to 16)  | 8.6% (2.7% to 15.4%)      |
| Saudi Arabia | Physical violence by sharp object               | 1 (1 to 2)    | 1 (1 to 2)    | -22.5% (-31.8% to -13%)   |
| Saudi Arabia | Poisoning by carbon monoxide                    | 0 (0 to 0)    | 0 (0 to 0)    | 45.1% (29% to 64.4%)      |
| Saudi Arabia | Poisoning by other means                        | 0 (0 to 0)    | 0 (0 to 0)    | -18.5% (-26.2% to -10.9%) |
| Saudi Arabia | Pulmonary aspiration and foreign body in airway | 0 (0 to 1)    | 0 (0 to 1)    | 3.5% (-5% to 13.7%)       |
| Saudi Arabia | Self-harm by firearm                            | 0 (0 to 0)    | 0 (0 to 0)    | 85.5% (62.7% to 111.5%)   |
| Saudi Arabia | Self-harm by other specified means              | 1 (0 to 1)    | 1 (1 to 2)    | 94% (80% to 108.9%)       |
| Saudi Arabia | Unintentional firearm injuries                  | 3 (2 to 5)    | 2 (1 to 3)    | -31.6% (-39.4% to -23.3%) |
| Saudi Arabia | Venomous animal contact                         | 1 (0 to 3)    | 1 (1 to 3)    | 3.1% (-3.8% to 11.2%)     |
| Senegal      | Adverse effects of medical treatment            | 0 (0 to 0)    | 0 (0 to 0)    | 0% (0% to 0%)             |
| Senegal      | Conflict and terrorism                          | 6 (2 to 16)   | 0 (0 to 0)    | NA                        |
| Senegal      | Cyclist road injuries                           | 23 (14 to 34) | 26 (17 to 39) | 14% (6.4% to 22.9%)       |
| Senegal      | Drowning                                        | 0 (0 to 0)    | 0 (0 to 0)    | -8.2% (-15.3% to 0.1%)    |
| Senegal      | Environmental heat and cold exposure            | 0 (0 to 1)    | 0 (0 to 1)    | 0.3% (-5.8% to 6.1%)      |
| Senegal      | Executions and police conflict                  | 0 (0 to 0)    | 0 (0 to 0)    | NA                        |
| Senegal      | Exposure to forces of nature                    | 0 (0 to 0)    | 0 (0 to 0)    | NA                        |
| Senegal      | Falls                                           | 17 (11 to 26) | 20 (13 to 30) | 17% (12.5% to 21.3%)      |
| Senegal      | Fire, heat, and hot substances                  | 0 (0 to 0)    | 0 (0 to 0)    | -8.4% (-14.8% to -2.9%)   |
| Senegal      | Foreign body in eyes                            | 0 (0 to 0)    | 0 (0 to 0)    | -0.1% (-0.5% to 0.4%)     |
| Senegal      | Foreign body in other body part                 | 3 (1 to 7)    | 3 (1 to 7)    | -0.6% (-5.2% to 4.2%)     |
| Senegal      | Motor vehicle road injuries                     | 50 (35 to 69) | 59 (41 to 80) | 17.2% (9.2% to 26.5%)     |
| Senegal      | Motorcyclist road injuries                      | 15 (11 to 22) | 17 (12 to 24) | 9.7% (1.9% to 18.3%)      |
| Senegal      | Non-venomous animal contact                     | 3 (1 to 6)    | 3 (1 to 5)    | -9.3% (-13.8% to -4.2%)   |
| Senegal      | Other exposure to mechanical forces             | 25 (12 to 45) | 24 (12 to 43) | -5% (-11.1% to 1.3%)      |
| Senegal      | Other road injuries                             | 2 (1 to 4)    | 2 (1 to 4)    | 11.4% (2.9% to 20.9%)     |
| Senegal      | Other transport injuries                        | 3 (2 to 4)    | 3 (2 to 4)    | -5.8% (-13.3% to 1.9%)    |
| Senegal      | Other unintentional injuries                    | 3 (2 to 5)    | 2 (1 to 4)    | -10.7% (-16.5% to -4.9%)  |
| Senegal      | Pedestrian road injuries                        | 57 (42 to 74) | 52 (38 to 69) | -9.3% (-14.9% to -3.6%)   |
| Senegal      | Physical violence by firearm                    | 0 (0 to 0)    | 0 (0 to 0)    | 53.7% (30.8% to 81.1%)    |
| Senegal      | Physical violence by other means                | 4 (2 to 6)    | 4 (3 to 6)    | 4.7% (-0.5% to 10.5%)     |
| Senegal      | Physical violence by sharp object               | 1 (1 to 2)    | 1 (1 to 2)    | 4.6% (-2.7% to 12.2%)     |
| Senegal      | Poisoning by carbon monoxide                    | 0 (0 to 0)    | 0 (0 to 0)    | 10.1% (-1.1% to 23.3%)    |
| Senegal      | Poisoning by other means                        | 0 (0 to 0)    | 0 (0 to 0)    | -14.9% (-21.5% to -8.1%)  |
| Senegal      | Pulmonary aspiration and foreign body in airway | 0 (0 to 0)    | 0 (0 to 0)    | -7.6% (-15.8% to 1.5%)    |
| Senegal      | Self-harm by firearm                            | 0 (0 to 0)    | 0 (0 to 0)    | 16% (8.1% to 25%)         |
| Senegal      | Self-harm by other specified means              | 0 (0 to 0)    | 0 (0 to 0)    | 8% (2.4% to 13.9%)        |
| Senegal      | Unintentional firearm injuries                  | 1 (0 to 2)    | 1 (0 to 2)    | -12.1% (-19.8% to -4%)    |
| Senegal      | Venomous animal contact                         | 0 (0 to 1)    | 0 (0 to 1)    | -6.9% (-13.1% to 0.7%)    |

|            |                                                 |                  |                  |                           |
|------------|-------------------------------------------------|------------------|------------------|---------------------------|
| Serbia     | Adverse effects of medical treatment            | 0 (0 to 0)       | 0 (0 to 0)       | 0% (0% to 0%)             |
| Serbia     | Conflict and terrorism                          | 0 (0 to 0)       | 0 (0 to 0)       | NA                        |
| Serbia     | Cyclist road injuries                           | 82 (60 to 109)   | 62 (46 to 83)    | -23.9% (-32% to -15%)     |
| Serbia     | Drowning                                        | 0 (0 to 0)       | 0 (0 to 1)       | 92.1% (63.2% to 130.3%)   |
| Serbia     | Environmental heat and cold exposure            | 2 (1 to 2)       | 2 (1 to 2)       | -8% (-12.8% to -4%)       |
| Serbia     | Executions and police conflict                  | 0 (0 to 0)       | 0 (0 to 0)       | NA                        |
| Serbia     | Exposure to forces of nature                    | 0 (0 to 0)       | 0 (0 to 0)       | NA                        |
| Serbia     | Falls                                           | 175 (135 to 230) | 239 (181 to 318) | 36.7% (29.9% to 42.8%)    |
| Serbia     | Fire, heat, and hot substances                  | 4 (2 to 6)       | 4 (2 to 6)       | 0.7% (-5.9% to 7.6%)      |
| Serbia     | Foreign body in eyes                            | 0 (0 to 0)       | 0 (0 to 0)       | 0.9% (0.4% to 1.7%)       |
| Serbia     | Foreign body in other body part                 | 2 (1 to 5)       | 2 (1 to 5)       | 1.5% (-4.1% to 7%)        |
| Serbia     | Motor vehicle road injuries                     | 115 (89 to 146)  | 85 (65 to 107)   | -26.5% (-33.1% to -18.1%) |
| Serbia     | Motorcyclist road injuries                      | 19 (14 to 25)    | 13 (10 to 18)    | -28% (-37.8% to -17%)     |
| Serbia     | Non-venomous animal contact                     | 6 (3 to 11)      | 6 (3 to 11)      | -5.9% (-10.6% to -0.9%)   |
| Serbia     | Other exposure to mechanical forces             | 132 (82 to 208)  | 134 (81 to 212)  | 1% (-4.6% to 6.7%)        |
| Serbia     | Other road injuries                             | 2 (1 to 3)       | 1 (1 to 2)       | -11.9% (-21.5% to -0.8%)  |
| Serbia     | Other transport injuries                        | 7 (5 to 9)       | 6 (5 to 8)       | -10.8% (-18.2% to -3.2%)  |
| Serbia     | Other unintentional injuries                    | 37 (24 to 60)    | 29 (18 to 47)    | -23.3% (-31.3% to -15.1%) |
| Serbia     | Pedestrian road injuries                        | 44 (34 to 57)    | 28 (20 to 36)    | -37.2% (-44.2% to -29.8%) |
| Serbia     | Physical violence by firearm                    | 0 (0 to 1)       | 0 (0 to 1)       | -1.5% (-17.8% to 16.8%)   |
| Serbia     | Physical violence by other means                | 42 (29 to 59)    | 27 (19 to 38)    | -35.8% (-41.4% to -29.7%) |
| Serbia     | Physical violence by sharp object               | 3 (2 to 4)       | 2 (1 to 3)       | -31.2% (-40.4% to -21.6%) |
| Serbia     | Poisoning by carbon monoxide                    | 0 (0 to 0)       | 0 (0 to 0)       | 41.5% (29.6% to 56.2%)    |
| Serbia     | Poisoning by other means                        | 0 (0 to 1)       | 0 (0 to 1)       | 7.3% (-3.5% to 15.9%)     |
| Serbia     | Pulmonary aspiration and foreign body in airway | 1 (1 to 2)       | 1 (0 to 1)       | -15.1% (-24% to -7.2%)    |
| Serbia     | Self-harm by firearm                            | 1 (1 to 2)       | 1 (1 to 1)       | -13.9% (-23.3% to -2.1%)  |
| Serbia     | Self-harm by other specified means              | 3 (2 to 5)       | 2 (2 to 4)       | -31.7% (-36% to -27%)     |
| Serbia     | Unintentional firearm injuries                  | 1 (1 to 2)       | 1 (1 to 2)       | -13.4% (-22.3% to -5.1%)  |
| Serbia     | Venomous animal contact                         | 5 (2 to 10)      | 5 (2 to 9)       | -9.8% (-14.9% to -4.7%)   |
| Seychelles | Adverse effects of medical treatment            | 0 (0 to 0)       | 0 (0 to 0)       | 0% (0% to 0%)             |
| Seychelles | Conflict and terrorism                          | 0 (0 to 0)       | 0 (0 to 0)       | NA                        |
| Seychelles | Cyclist road injuries                           | 11 (6 to 18)     | 14 (9 to 22)     | 28.6% (16.1% to 42.4%)    |
| Seychelles | Drowning                                        | 0 (0 to 0)       | 0 (0 to 0)       | 11.1% (1% to 23.6%)       |
| Seychelles | Environmental heat and cold exposure            | 0 (0 to 0)       | 0 (0 to 0)       | 3.3% (-2.6% to 8.4%)      |
| Seychelles | Executions and police conflict                  | 0 (0 to 0)       | 0 (0 to 0)       | NA                        |
| Seychelles | Exposure to forces of nature                    | 0 (0 to 0)       | 0 (0 to 0)       | NA                        |
| Seychelles | Falls                                           | 30 (19 to 45)    | 35 (22 to 54)    | 17.3% (11.9% to 22.1%)    |
| Seychelles | Fire, heat, and hot substances                  | 0 (0 to 1)       | 0 (0 to 0)       | -30.3% (-35.4% to -24.9%) |
| Seychelles | Foreign body in eyes                            | 0 (0 to 0)       | 0 (0 to 0)       | 2.4% (1.1% to 4.1%)       |
| Seychelles | Foreign body in other body part                 | 1 (0 to 2)       | 1 (0 to 2)       | 1.1% (-3.4% to 6.1%)      |
| Seychelles | Motor vehicle road injuries                     | 29 (20 to 42)    | 37 (25 to 53)    | 26.8% (15.3% to 39.3%)    |
| Seychelles | Motorcyclist road injuries                      | 34 (25 to 46)    | 36 (26 to 49)    | 7.2% (-2.9% to 18.1%)     |
| Seychelles | Non-venomous animal contact                     | 2 (1 to 4)       | 2 (1 to 3)       | -16.5% (-20.3% to -11%)   |

|              |                                                 |               |               |                           |
|--------------|-------------------------------------------------|---------------|---------------|---------------------------|
| Seychelles   | Other exposure to mechanical forces             | 35 (18 to 65) | 28 (14 to 52) | -21.9% (-29.7% to -16.4%) |
| Seychelles   | Other road injuries                             | 2 (1 to 3)    | 2 (1 to 4)    | 25.6% (13.4% to 39.5%)    |
| Seychelles   | Other transport injuries                        | 3 (2 to 4)    | 3 (2 to 4)    | 1.1% (-6.2% to 7.1%)      |
| Seychelles   | Other unintentional injuries                    | 3 (2 to 6)    | 3 (2 to 5)    | -11.1% (-17.6% to -4.1%)  |
| Seychelles   | Pedestrian road injuries                        | 18 (13 to 25) | 21 (15 to 29) | 13.3% (4.5% to 22.5%)     |
| Seychelles   | Physical violence by firearm                    | 0 (0 to 1)    | 0 (0 to 1)    | 44.2% (29.8% to 60.6%)    |
| Seychelles   | Physical violence by other means                | 27 (18 to 41) | 23 (15 to 35) | -16% (-21.1% to -11.1%)   |
| Seychelles   | Physical violence by sharp object               | 5 (3 to 10)   | 4 (2 to 8)    | -20.3% (-28.1% to -13.1%) |
| Seychelles   | Poisoning by carbon monoxide                    | 0 (0 to 0)    | 0 (0 to 0)    | 9.8% (0.1% to 21.5%)      |
| Seychelles   | Poisoning by other means                        | 0 (0 to 0)    | 0 (0 to 0)    | -15.9% (-22.3% to -8.7%)  |
| Seychelles   | Pulmonary aspiration and foreign body in airway | 0 (0 to 0)    | 0 (0 to 0)    | -18.7% (-26.4% to -10.3%) |
| Seychelles   | Self-harm by firearm                            | 0 (0 to 0)    | 0 (0 to 0)    | 16% (1.2% to 34.7%)       |
| Seychelles   | Self-harm by other specified means              | 0 (0 to 0)    | 0 (0 to 0)    | 2.4% (-4.2% to 9.8%)      |
| Seychelles   | Unintentional firearm injuries                  | 1 (1 to 3)    | 1 (0 to 3)    | -10.9% (-20.6% to -0.9%)  |
| Seychelles   | Venomous animal contact                         | 0 (0 to 1)    | 0 (0 to 1)    | -22.4% (-30.3% to -14.8%) |
| Sierra Leone | Adverse effects of medical treatment            | 0 (0 to 0)    | 0 (0 to 0)    | 0% (0% to 0%)             |
| Sierra Leone | Conflict and terrorism                          | 0 (0 to 0)    | 0 (0 to 0)    | NA                        |
| Sierra Leone | Cyclist road injuries                           | 25 (16 to 37) | 28 (17 to 41) | 12.8% (5.5% to 20.7%)     |
| Sierra Leone | Drowning                                        | 0 (0 to 0)    | 0 (0 to 0)    | -16.4% (-22.1% to -11%)   |
| Sierra Leone | Environmental heat and cold exposure            | 0 (0 to 1)    | 0 (0 to 1)    | 3% (-3.2% to 9.2%)        |
| Sierra Leone | Executions and police conflict                  | 0 (0 to 0)    | 0 (0 to 1)    | NA                        |
| Sierra Leone | Exposure to forces of nature                    | 0 (0 to 0)    | 0 (0 to 0)    | NA                        |
| Sierra Leone | Falls                                           | 17 (11 to 26) | 19 (12 to 29) | 9.8% (5.2% to 14.8%)      |
| Sierra Leone | Fire, heat, and hot substances                  | 0 (0 to 0)    | 0 (0 to 0)    | -6.6% (-12.2% to -0.2%)   |
| Sierra Leone | Foreign body in eyes                            | 0 (0 to 0)    | 0 (0 to 0)    | 0.1% (-0.2% to 0.5%)      |
| Sierra Leone | Foreign body in other body part                 | 4 (2 to 8)    | 3 (1 to 8)    | -3.6% (-8.6% to 1.8%)     |
| Sierra Leone | Motor vehicle road injuries                     | 49 (34 to 69) | 58 (40 to 81) | 18.6% (10.6% to 27.4%)    |
| Sierra Leone | Motorcyclist road injuries                      | 40 (29 to 53) | 41 (30 to 56) | 3.7% (-3.1% to 10%)       |
| Sierra Leone | Non-venomous animal contact                     | 3 (1 to 5)    | 3 (1 to 6)    | 1.1% (-3.6% to 6.1%)      |
| Sierra Leone | Other exposure to mechanical forces             | 25 (13 to 45) | 22 (11 to 40) | -12.1% (-17% to -7.5%)    |
| Sierra Leone | Other road injuries                             | 2 (1 to 4)    | 2 (1 to 4)    | 17.3% (7.2% to 27.2%)     |
| Sierra Leone | Other transport injuries                        | 3 (2 to 4)    | 3 (2 to 4)    | -7.1% (-12.4% to -1.3%)   |
| Sierra Leone | Other unintentional injuries                    | 3 (2 to 5)    | 2 (1 to 4)    | -18.7% (-23.8% to -13.1%) |
| Sierra Leone | Pedestrian road injuries                        | 32 (22 to 43) | 37 (26 to 50) | 15.8% (8% to 23.8%)       |
| Sierra Leone | Physical violence by firearm                    | 0 (0 to 0)    | 0 (0 to 0)    | 25.5% (10.8% to 42.8%)    |
| Sierra Leone | Physical violence by other means                | 4 (3 to 6)    | 4 (2 to 6)    | -7.1% (-12.4% to -1.5%)   |
| Sierra Leone | Physical violence by sharp object               | 1 (1 to 2)    | 1 (1 to 2)    | -3.9% (-10.5% to 2.7%)    |
| Sierra Leone | Poisoning by carbon monoxide                    | 0 (0 to 0)    | 0 (0 to 0)    | 4.5% (-6.3% to 17.2%)     |
| Sierra Leone | Poisoning by other means                        | 0 (0 to 0)    | 0 (0 to 0)    | -17.4% (-24.5% to -10.8%) |
| Sierra Leone | Pulmonary aspiration and foreign body in airway | 0 (0 to 0)    | 0 (0 to 0)    | -11.1% (-21.2% to -0.5%)  |
| Sierra Leone | Self-harm by firearm                            | 0 (0 to 0)    | 0 (0 to 0)    | 29.5% (21% to 38.1%)      |
| Sierra Leone | Self-harm by other specified means              | 0 (0 to 0)    | 0 (0 to 0)    | 35.4% (28.4% to 43%)      |
| Sierra Leone | Unintentional firearm injuries                  | 1 (0 to 2)    | 1 (0 to 2)    | -15.2% (-22.1% to -7.6%)  |



|              |                                                 |                  |                  |                           |
|--------------|-------------------------------------------------|------------------|------------------|---------------------------|
| Sierra Leone | Venomous animal contact                         | 0 (0 to 1)       | 0 (0 to 1)       | 4.1% (-3% to 11.7%)       |
| Singapore    | Adverse effects of medical treatment            | 0 (0 to 0)       | 0 (0 to 0)       | 0% (0% to 0%)             |
| Singapore    | Conflict and terrorism                          | 0 (0 to 0)       | 0 (0 to 0)       | NA                        |
| Singapore    | Cyclist road injuries                           | 21 (15 to 28)    | 17 (12 to 22)    | -20.8% (-30.4% to -9.8%)  |
| Singapore    | Drowning                                        | 0 (0 to 1)       | 1 (0 to 1)       | 136.6% (115.1% to 156.4%) |
| Singapore    | Environmental heat and cold exposure            | 5 (3 to 7)       | 5 (4 to 7)       | 9% (4.7% to 14.3%)        |
| Singapore    | Executions and police conflict                  | 0 (0 to 0)       | 0 (0 to 0)       | NA                        |
| Singapore    | Exposure to forces of nature                    | 0 (0 to 0)       | 0 (0 to 0)       | NA                        |
| Singapore    | Falls                                           | 153 (118 to 200) | 156 (119 to 206) | 1.9% (-3.5% to 7.1%)      |
| Singapore    | Fire, heat, and hot substances                  | 3 (2 to 5)       | 3 (2 to 5)       | 1.8% (-2.3% to 6.1%)      |
| Singapore    | Foreign body in eyes                            | 0 (0 to 0)       | 0 (0 to 0)       | 0.7% (0.1% to 1.7%)       |
| Singapore    | Foreign body in other body part                 | 2 (1 to 5)       | 2 (1 to 5)       | -4.5% (-7.7% to -1.1%)    |
| Singapore    | Motor vehicle road injuries                     | 20 (15 to 26)    | 17 (12 to 23)    | -17.1% (-28% to -5.7%)    |
| Singapore    | Motorcyclist road injuries                      | 17 (13 to 22)    | 10 (7 to 13)     | -41.9% (-52% to -30.8%)   |
| Singapore    | Non-venomous animal contact                     | 6 (3 to 10)      | 4 (2 to 7)       | -26.9% (-29.8% to -23.4%) |
| Singapore    | Other exposure to mechanical forces             | 76 (47 to 120)   | 68 (41 to 108)   | -11.3% (-18.2% to -5.1%)  |
| Singapore    | Other road injuries                             | 1 (1 to 2)       | 1 (0 to 2)       | -17.1% (-27.6% to -5.5%)  |
| Singapore    | Other transport injuries                        | 7 (5 to 9)       | 6 (5 to 9)       | -5.9% (-9.4% to -1.9%)    |
| Singapore    | Other unintentional injuries                    | 37 (24 to 58)    | 30 (19 to 49)    | -17.2% (-24.3% to -11.1%) |
| Singapore    | Pedestrian road injuries                        | 10 (7 to 13)     | 7 (5 to 9)       | -28% (-38.7% to -16.8%)   |
| Singapore    | Physical violence by firearm                    | 0 (0 to 1)       | 1 (0 to 1)       | 56.1% (34.5% to 82.5%)    |
| Singapore    | Physical violence by other means                | 17 (12 to 24)    | 13 (9 to 19)     | -22.7% (-31.6% to -13.4%) |
| Singapore    | Physical violence by sharp object               | 2 (1 to 3)       | 1 (1 to 2)       | -28% (-41% to -14.9%)     |
| Singapore    | Poisoning by carbon monoxide                    | 0 (0 to 0)       | 0 (0 to 0)       | 13.4% (4% to 23.1%)       |
| Singapore    | Poisoning by other means                        | 0 (0 to 1)       | 0 (0 to 0)       | -5.5% (-10.3% to -0.4%)   |
| Singapore    | Pulmonary aspiration and foreign body in airway | 1 (0 to 1)       | 0 (0 to 1)       | -14.6% (-21.3% to -7.3%)  |
| Singapore    | Self-harm by firearm                            | 0 (0 to 0)       | 0 (0 to 0)       | 11.2% (-5.2% to 33.1%)    |
| Singapore    | Self-harm by other specified means              | 4 (2 to 6)       | 2 (2 to 4)       | -35.1% (-38.7% to -31%)   |
| Singapore    | Unintentional firearm injuries                  | 1 (1 to 2)       | 1 (1 to 2)       | 1% (-8.8% to 11.1%)       |
| Singapore    | Venomous animal contact                         | 2 (1 to 5)       | 2 (1 to 4)       | -24.9% (-29.1% to -19.8%) |
| Slovakia     | Adverse effects of medical treatment            | 0 (0 to 0)       | 0 (0 to 0)       | 0% (0% to 0%)             |
| Slovakia     | Conflict and terrorism                          | 0 (0 to 0)       | 0 (0 to 0)       | NA                        |
| Slovakia     | Cyclist road injuries                           | 87 (64 to 112)   | 61 (45 to 82)    | -29.5% (-38.3% to -20.8%) |
| Slovakia     | Drowning                                        | 0 (0 to 0)       | 1 (0 to 1)       | 79.7% (60.6% to 104.2%)   |
| Slovakia     | Environmental heat and cold exposure            | 3 (2 to 3)       | 2 (2 to 3)       | -7.3% (-11.7% to -2.8%)   |
| Slovakia     | Executions and police conflict                  | 0 (0 to 0)       | 0 (0 to 0)       | NA                        |
| Slovakia     | Exposure to forces of nature                    | 0 (0 to 0)       | 0 (0 to 0)       | NA                        |
| Slovakia     | Falls                                           | 352 (281 to 444) | 368 (290 to 466) | 4.4% (-0.2% to 9.2%)      |
| Slovakia     | Fire, heat, and hot substances                  | 4 (2 to 6)       | 4 (2 to 6)       | -4.1% (-9.7% to 1.5%)     |
| Slovakia     | Foreign body in eyes                            | 0 (0 to 0)       | 0 (0 to 0)       | 0.5% (0.2% to 1%)         |
| Slovakia     | Foreign body in other body part                 | 2 (1 to 5)       | 2 (1 to 5)       | 1.4% (-4.1% to 7.1%)      |
| Slovakia     | Motor vehicle road injuries                     | 124 (95 to 157)  | 93 (71 to 118)   | -25.2% (-34.1% to -15.7%) |
| Slovakia     | Motorcyclist road injuries                      | 19 (14 to 25)    | 15 (11 to 20)    | -18.4% (-30.3% to -6.1%)  |

|          |                                                 |                  |                  |                           |
|----------|-------------------------------------------------|------------------|------------------|---------------------------|
| Slovakia | Non-venomous animal contact                     | 6 (3 to 11)      | 5 (3 to 9)       | -21.9% (-26.3% to -17.9%) |
| Slovakia | Other exposure to mechanical forces             | 163 (104 to 256) | 148 (92 to 230)  | -9.5% (-17% to -2.9%)     |
| Slovakia | Other road injuries                             | 1 (1 to 2)       | 1 (1 to 2)       | -5% (-15.8% to 7.4%)      |
| Slovakia | Other transport injuries                        | 9 (7 to 12)      | 7 (5 to 10)      | -19.9% (-25.4% to -14.3%) |
| Slovakia | Other unintentional injuries                    | 31 (20 to 51)    | 28 (17 to 46)    | -10.2% (-15.8% to -3.9%)  |
| Slovakia | Pedestrian road injuries                        | 50 (39 to 64)    | 28 (21 to 37)    | -44% (-50.5% to -36.7%)   |
| Slovakia | Physical violence by firearm                    | 0 (0 to 0)       | 0 (0 to 1)       | 43.5% (24.9% to 62.9%)    |
| Slovakia | Physical violence by other means                | 32 (22 to 45)    | 26 (18 to 37)    | -17.5% (-24.6% to -10.4%) |
| Slovakia | Physical violence by sharp object               | 2 (1 to 4)       | 2 (1 to 3)       | -19.7% (-28.4% to -11.8%) |
| Slovakia | Poisoning by carbon monoxide                    | 0 (0 to 0)       | 0 (0 to 0)       | 27.2% (17% to 40%)        |
| Slovakia | Poisoning by other means                        | 0 (0 to 1)       | 0 (0 to 1)       | -2.7% (-10.3% to 4.4%)    |
| Slovakia | Pulmonary aspiration and foreign body in airway | 1 (1 to 2)       | 1 (1 to 2)       | -17.9% (-24.2% to -10.2%) |
| Slovakia | Self-harm by firearm                            | 1 (0 to 1)       | 1 (0 to 1)       | -8.5% (-20.8% to 4.9%)    |
| Slovakia | Self-harm by other specified means              | 3 (2 to 4)       | 2 (2 to 4)       | -13.1% (-18.7% to -7.5%)  |
| Slovakia | Unintentional firearm injuries                  | 1 (1 to 2)       | 1 (1 to 2)       | -16.5% (-26.5% to -7.1%)  |
| Slovakia | Venomous animal contact                         | 5 (2 to 9)       | 4 (2 to 8)       | -19% (-23.5% to -13.9%)   |
| Slovenia | Adverse effects of medical treatment            | 0 (0 to 0)       | 0 (0 to 0)       | 0% (0% to 0%)             |
| Slovenia | Conflict and terrorism                          | 0 (0 to 0)       | 0 (0 to 0)       | NA                        |
| Slovenia | Cyclist road injuries                           | 100 (72 to 132)  | 70 (50 to 94)    | -30.4% (-38.2% to -21.6%) |
| Slovenia | Drowning                                        | 0 (0 to 0)       | 1 (0 to 1)       | 141.3% (113.8% to 172.1%) |
| Slovenia | Environmental heat and cold exposure            | 2 (2 to 3)       | 2 (1 to 2)       | -36.5% (-42.8% to -30.5%) |
| Slovenia | Executions and police conflict                  | 0 (0 to 0)       | 0 (0 to 0)       | NA                        |
| Slovenia | Exposure to forces of nature                    | 0 (0 to 1)       | 0 (0 to 0)       | NA                        |
| Slovenia | Falls                                           | 397 (318 to 501) | 401 (320 to 504) | 1% (-3.9% to 6.1%)        |
| Slovenia | Fire, heat, and hot substances                  | 4 (2 to 6)       | 4 (2 to 7)       | 2.5% (-2.8% to 8%)        |
| Slovenia | Foreign body in eyes                            | 0 (0 to 0)       | 0 (0 to 0)       | 1.4% (0.6% to 2.7%)       |
| Slovenia | Foreign body in other body part                 | 3 (1 to 6)       | 3 (1 to 6)       | 2.2% (-3.4% to 8.5%)      |
| Slovenia | Motor vehicle road injuries                     | 213 (168 to 269) | 102 (78 to 129)  | -52% (-56.8% to -46.3%)   |
| Slovenia | Motorcyclist road injuries                      | 28 (21 to 37)    | 24 (18 to 32)    | -14.4% (-26.5% to 0.6%)   |
| Slovenia | Non-venomous animal contact                     | 6 (3 to 11)      | 5 (3 to 9)       | -15.7% (-20.2% to -10.5%) |
| Slovenia | Other exposure to mechanical forces             | 192 (122 to 298) | 166 (104 to 261) | -13.5% (-20.6% to -5.6%)  |
| Slovenia | Other road injuries                             | 2 (1 to 3)       | 1 (1 to 3)       | -12.6% (-23.6% to -1.1%)  |
| Slovenia | Other transport injuries                        | 7 (5 to 9)       | 7 (5 to 9)       | -3% (-8% to 2.2%)         |
| Slovenia | Other unintentional injuries                    | 32 (20 to 52)    | 35 (21 to 58)    | 8.6% (1.7% to 15.3%)      |
| Slovenia | Pedestrian road injuries                        | 45 (34 to 58)    | 27 (20 to 36)    | -39.8% (-48.6% to -29.4%) |
| Slovenia | Physical violence by firearm                    | 0 (0 to 1)       | 0 (0 to 1)       | 22.6% (6% to 41.2%)       |
| Slovenia | Physical violence by other means                | 30 (21 to 42)    | 24 (17 to 35)    | -18.4% (-26.5% to -10.4%) |
| Slovenia | Physical violence by sharp object               | 3 (2 to 5)       | 2 (1 to 3)       | -26% (-37.3% to -16%)     |
| Slovenia | Poisoning by carbon monoxide                    | 0 (0 to 0)       | 0 (0 to 0)       | 32% (21.5% to 43.6%)      |
| Slovenia | Poisoning by other means                        | 0 (0 to 1)       | 0 (0 to 1)       | 0.8% (-6.2% to 8.1%)      |
| Slovenia | Pulmonary aspiration and foreign body in airway | 1 (0 to 2)       | 1 (0 to 1)       | -4.6% (-12.3% to 4%)      |
| Slovenia | Self-harm by firearm                            | 1 (1 to 2)       | 1 (1 to 2)       | -23.9% (-33.6% to -12.6%) |
| Slovenia | Self-harm by other specified means              | 6 (4 to 9)       | 4 (2 to 5)       | -35.4% (-39.4% to -31.1%) |

|                 |                                                 |                 |                  |                          |
|-----------------|-------------------------------------------------|-----------------|------------------|--------------------------|
| Slovenia        | Unintentional firearm injuries                  | 1 (1 to 2)      | 1 (1 to 2)       | 1.4% (-10.1% to 13.2%)   |
| Slovenia        | Venomous animal contact                         | 5 (2 to 9)      | 4 (2 to 8)       | -12.8% (-17.9% to -6.7%) |
| Solomon Islands | Adverse effects of medical treatment            | 0 (0 to 0)      | 0 (0 to 0)       | 0% (0% to 0%)            |
| Solomon Islands | Conflict and terrorism                          | 0 (0 to 0)      | 0 (0 to 0)       | NA                       |
| Solomon Islands | Cyclist road injuries                           | 10 (6 to 14)    | 10 (7 to 15)     | 6.5% (-0.7% to 14%)      |
| Solomon Islands | Drowning                                        | 1 (0 to 1)      | 1 (0 to 1)       | 0.3% (-9.5% to 11.3%)    |
| Solomon Islands | Environmental heat and cold exposure            | 2 (2 to 3)      | 2 (2 to 3)       | -5.3% (-11% to 0.3%)     |
| Solomon Islands | Executions and police conflict                  | 0 (0 to 0)      | 0 (0 to 0)       | NA                       |
| Solomon Islands | Exposure to forces of nature                    | 0 (0 to 0)      | 0 (0 to 0)       | NA                       |
| Solomon Islands | Falls                                           | 95 (74 to 124)  | 132 (103 to 170) | 39.3% (34.2% to 44.9%)   |
| Solomon Islands | Fire, heat, and hot substances                  | 2 (1 to 3)      | 1 (1 to 2)       | -10.8% (-17.5% to -4.7%) |
| Solomon Islands | Foreign body in eyes                            | 0 (0 to 0)      | 0 (0 to 0)       | -1.9% (-3.2% to -1%)     |
| Solomon Islands | Foreign body in other body part                 | 1 (0 to 1)      | 1 (0 to 1)       | -2.4% (-6.3% to 2.2%)    |
| Solomon Islands | Motor vehicle road injuries                     | 23 (17 to 31)   | 23 (17 to 29)    | -3.3% (-10.2% to 4.2%)   |
| Solomon Islands | Motorcyclist road injuries                      | 17 (13 to 22)   | 18 (14 to 24)    | 5.2% (-3.9% to 14.5%)    |
| Solomon Islands | Non-venomous animal contact                     | 6 (3 to 10)     | 5 (3 to 9)       | -16% (-20.6% to -11.4%)  |
| Solomon Islands | Other exposure to mechanical forces             | 11 (6 to 19)    | 10 (6 to 17)     | -11.9% (-16.9% to -6.9%) |
| Solomon Islands | Other road injuries                             | 1 (1 to 2)      | 1 (1 to 2)       | 4.8% (-4.1% to 14.7%)    |
| Solomon Islands | Other transport injuries                        | 8 (7 to 11)     | 8 (6 to 10)      | -9.4% (-13.9% to -5.2%)  |
| Solomon Islands | Other unintentional injuries                    | 10 (6 to 16)    | 9 (6 to 15)      | -7.5% (-12.4% to -2.1%)  |
| Solomon Islands | Pedestrian road injuries                        | 17 (12 to 21)   | 17 (12 to 22)    | 0.2% (-6.9% to 8.1%)     |
| Solomon Islands | Physical violence by firearm                    | 0 (0 to 0)      | 0 (0 to 0)       | -7.6% (-19.6% to 5.4%)   |
| Solomon Islands | Physical violence by other means                | 30 (21 to 42)   | 21 (15 to 31)    | -28.2% (-33% to -23.4%)  |
| Solomon Islands | Physical violence by sharp object               | 3 (2 to 5)      | 2 (1 to 4)       | -32.9% (-40% to -25.5%)  |
| Solomon Islands | Poisoning by carbon monoxide                    | 0 (0 to 0)      | 0 (0 to 0)       | 28.3% (15.4% to 43.5%)   |
| Solomon Islands | Poisoning by other means                        | 0 (0 to 0)      | 0 (0 to 0)       | -1.5% (-9.8% to 7.1%)    |
| Solomon Islands | Pulmonary aspiration and foreign body in airway | 0 (0 to 0)      | 0 (0 to 0)       | -2.7% (-13% to 9.4%)     |
| Solomon Islands | Self-harm by firearm                            | 1 (1 to 2)      | 1 (1 to 2)       | -0.1% (-13.3% to 12.7%)  |
| Solomon Islands | Self-harm by other specified means              | 2 (1 to 4)      | 3 (2 to 4)       | 19% (9.6% to 29.9%)      |
| Solomon Islands | Unintentional firearm injuries                  | 2 (1 to 3)      | 2 (1 to 3)       | -14.4% (-20.5% to -8%)   |
| Solomon Islands | Venomous animal contact                         | 3 (1 to 6)      | 3 (1 to 5)       | -10.2% (-15.8% to -3.2%) |
| Somalia         | Adverse effects of medical treatment            | 0 (0 to 0)      | 0 (0 to 0)       | 0% (0% to 0%)            |
| Somalia         | Conflict and terrorism                          | 177 (54 to 466) | 38 (12 to 96)    | NA                       |
| Somalia         | Cyclist road injuries                           | 29 (19 to 43)   | 33 (22 to 48)    | 11.6% (3.5% to 20.6%)    |
| Somalia         | Drowning                                        | 0 (0 to 0)      | 0 (0 to 0)       | -12.4% (-17.7% to -6.8%) |
| Somalia         | Environmental heat and cold exposure            | 0 (0 to 1)      | 0 (0 to 1)       | -3.7% (-8.8% to 1.3%)    |
| Somalia         | Executions and police conflict                  | 0 (0 to 0)      | 1 (0 to 3)       | NA                       |
| Somalia         | Exposure to forces of nature                    | 0 (0 to 0)      | 0 (0 to 0)       | NA                       |
| Somalia         | Falls                                           | 20 (12 to 31)   | 22 (14 to 34)    | 10.8% (6.8% to 14.8%)    |
| Somalia         | Fire, heat, and hot substances                  | 0 (0 to 1)      | 0 (0 to 1)       | -11% (-16.1% to -6.4%)   |
| Somalia         | Foreign body in eyes                            | 0 (0 to 0)      | 0 (0 to 0)       | -0.9% (-2.2% to -0.1%)   |
| Somalia         | Foreign body in other body part                 | 3 (1 to 7)      | 3 (1 to 7)       | -4.1% (-10.5% to 1.7%)   |
| Somalia         | Motor vehicle road injuries                     | 35 (24 to 50)   | 33 (22 to 47)    | -7.5% (-15% to 0.4%)     |

|              |                                                 |               |               |                           |
|--------------|-------------------------------------------------|---------------|---------------|---------------------------|
| Somalia      | Motorcyclist road injuries                      | 20 (14 to 27) | 23 (17 to 32) | 20.3% (11.2% to 29.9%)    |
| Somalia      | Non-venomous animal contact                     | 9 (4 to 17)   | 9 (4 to 18)   | 3.5% (-1% to 8.9%)        |
| Somalia      | Other exposure to mechanical forces             | 28 (14 to 50) | 27 (13 to 49) | -4.4% (-9% to 2%)         |
| Somalia      | Other road injuries                             | 1 (1 to 2)    | 1 (1 to 2)    | -5.6% (-13.3% to 3%)      |
| Somalia      | Other transport injuries                        | 3 (2 to 4)    | 3 (2 to 5)    | 6.9% (1.3% to 12.2%)      |
| Somalia      | Other unintentional injuries                    | 3 (2 to 5)    | 3 (2 to 5)    | -11.3% (-15.8% to -6.4%)  |
| Somalia      | Pedestrian road injuries                        | 61 (45 to 81) | 54 (39 to 71) | -12% (-17.1% to -6.2%)    |
| Somalia      | Physical violence by firearm                    | 0 (0 to 0)    | 0 (0 to 0)    | 27% (15.9% to 37.9%)      |
| Somalia      | Physical violence by other means                | 8 (6 to 13)   | 10 (6 to 14)  | 14.7% (6.7% to 22.9%)     |
| Somalia      | Physical violence by sharp object               | 2 (1 to 4)    | 3 (1 to 5)    | 22.2% (12.4% to 32.9%)    |
| Somalia      | Poisoning by carbon monoxide                    | 0 (0 to 0)    | 0 (0 to 0)    | -0.3% (-10.3% to 11.3%)   |
| Somalia      | Poisoning by other means                        | 0 (0 to 0)    | 0 (0 to 0)    | -15.5% (-21.7% to -8.6%)  |
| Somalia      | Pulmonary aspiration and foreign body in airway | 0 (0 to 0)    | 0 (0 to 0)    | -8.8% (-19.1% to 3.3%)    |
| Somalia      | Self-harm by firearm                            | 0 (0 to 0)    | 0 (0 to 0)    | 8% (-0.1% to 17.4%)       |
| Somalia      | Self-harm by other specified means              | 0 (0 to 0)    | 0 (0 to 0)    | 1.2% (-4.1% to 7.1%)      |
| Somalia      | Unintentional firearm injuries                  | 1 (1 to 3)    | 1 (1 to 3)    | -4.2% (-10.7% to 3.5%)    |
| Somalia      | Venomous animal contact                         | 2 (0 to 5)    | 2 (0 to 5)    | 5.9% (-0.8% to 13.4%)     |
| South Africa | Adverse effects of medical treatment            | 0 (0 to 0)    | 0 (0 to 0)    | 0% (0% to 0%)             |
| South Africa | Conflict and terrorism                          | 4 (1 to 11)   | 0 (0 to 1)    | NA                        |
| South Africa | Cyclist road injuries                           | 13 (7 to 20)  | 12 (7 to 19)  | -5% (-11.1% to 1.1%)      |
| South Africa | Drowning                                        | 0 (0 to 0)    | 0 (0 to 0)    | -36% (-42% to -28.5%)     |
| South Africa | Environmental heat and cold exposure            | 0 (0 to 1)    | 0 (0 to 1)    | -4.3% (-9.4% to 0.6%)     |
| South Africa | Executions and police conflict                  | 0 (0 to 0)    | 0 (0 to 0)    | NA                        |
| South Africa | Exposure to forces of nature                    | 0 (0 to 0)    | 0 (0 to 0)    | NA                        |
| South Africa | Falls                                           | 22 (13 to 34) | 20 (12 to 32) | -5.8% (-9.1% to -2.5%)    |
| South Africa | Fire, heat, and hot substances                  | 0 (0 to 0)    | 0 (0 to 0)    | -33.4% (-37.6% to -29%)   |
| South Africa | Foreign body in eyes                            | 0 (0 to 0)    | 0 (0 to 0)    | 0.2% (-0.1% to 0.7%)      |
| South Africa | Foreign body in other body part                 | 5 (2 to 10)   | 5 (2 to 10)   | 2.4% (0.1% to 4.9%)       |
| South Africa | Motor vehicle road injuries                     | 54 (36 to 75) | 40 (27 to 56) | -26% (-30.5% to -21.3%)   |
| South Africa | Motorcyclist road injuries                      | 13 (9 to 20)  | 11 (7 to 16)  | -20.4% (-25.4% to -15.6%) |
| South Africa | Non-venomous animal contact                     | 3 (1 to 5)    | 3 (1 to 5)    | -6.6% (-12.4% to -0.7%)   |
| South Africa | Other exposure to mechanical forces             | 32 (16 to 59) | 26 (13 to 46) | -21.3% (-25.4% to -16.5%) |
| South Africa | Other road injuries                             | 2 (1 to 3)    | 2 (1 to 3)    | -1.8% (-8% to 4.8%)       |
| South Africa | Other transport injuries                        | 4 (3 to 5)    | 4 (2 to 5)    | -3.3% (-9.3% to 2%)       |
| South Africa | Other unintentional injuries                    | 2 (1 to 4)    | 2 (1 to 4)    | -12.8% (-18.5% to -7.8%)  |
| South Africa | Pedestrian road injuries                        | 47 (34 to 65) | 37 (26 to 50) | -22.7% (-27.6% to -18%)   |
| South Africa | Physical violence by firearm                    | 2 (1 to 3)    | 1 (0 to 1)    | -56.8% (-64.6% to -45.5%) |
| South Africa | Physical violence by other means                | 41 (26 to 65) | 25 (15 to 38) | -40.3% (-43.6% to -36.9%) |
| South Africa | Physical violence by sharp object               | 12 (6 to 22)  | 8 (4 to 15)   | -35.2% (-39.8% to -29.7%) |
| South Africa | Poisoning by carbon monoxide                    | 0 (0 to 0)    | 0 (0 to 0)    | -8.5% (-31.6% to 12.3%)   |
| South Africa | Poisoning by other means                        | 0 (0 to 0)    | 0 (0 to 0)    | -28.5% (-45.6% to -9.8%)  |
| South Africa | Pulmonary aspiration and foreign body in airway | 0 (0 to 0)    | 0 (0 to 0)    | -16.4% (-23.3% to -10.7%) |
| South Africa | Self-harm by firearm                            | 0 (0 to 0)    | 0 (0 to 0)    | -18.6% (-26.3% to -8.7%)  |

|              |                                                 |                  |                  |                           |
|--------------|-------------------------------------------------|------------------|------------------|---------------------------|
| South Africa | Self-harm by other specified means              | 0 (0 to 1)       | 0 (0 to 0)       | -32.8% (-37.7% to -27.3%) |
| South Africa | Unintentional firearm injuries                  | 1 (0 to 1)       | 1 (0 to 1)       | -10.3% (-18.4% to -1.2%)  |
| South Africa | Venomous animal contact                         | 0 (0 to 1)       | 0 (0 to 1)       | -0.1% (-10.1% to 10.3%)   |
| South Sudan  | Adverse effects of medical treatment            | 0 (0 to 0)       | 0 (0 to 0)       | 0% (0% to 0%)             |
| South Sudan  | Conflict and terrorism                          | 0 (0 to 0)       | 23 (7 to 59)     | NA                        |
| South Sudan  | Cyclist road injuries                           | 34 (22 to 50)    | 32 (21 to 48)    | -7.2% (-13.1% to -0.8%)   |
| South Sudan  | Drowning                                        | 0 (0 to 0)       | 0 (0 to 0)       | -11.6% (-17.9% to -5.1%)  |
| South Sudan  | Environmental heat and cold exposure            | 0 (0 to 1)       | 0 (0 to 1)       | -6.7% (-11.5% to -1.7%)   |
| South Sudan  | Executions and police conflict                  | 0 (0 to 0)       | 0 (0 to 1)       | NA                        |
| South Sudan  | Exposure to forces of nature                    | 0 (0 to 0)       | 0 (0 to 0)       | NA                        |
| South Sudan  | Falls                                           | 21 (13 to 33)    | 23 (14 to 36)    | 8.7% (4.9% to 13.3%)      |
| South Sudan  | Fire, heat, and hot substances                  | 0 (0 to 1)       | 0 (0 to 1)       | -10.7% (-15.2% to -7%)    |
| South Sudan  | Foreign body in eyes                            | 0 (0 to 0)       | 0 (0 to 0)       | -1.6% (-3.9% to -0.1%)    |
| South Sudan  | Foreign body in other body part                 | 3 (1 to 7)       | 3 (1 to 7)       | -5.9% (-10.7% to -1.3%)   |
| South Sudan  | Motor vehicle road injuries                     | 50 (33 to 71)    | 44 (29 to 62)    | -12% (-18.1% to -5.6%)    |
| South Sudan  | Motorcyclist road injuries                      | 20 (14 to 29)    | 19 (13 to 26)    | -9% (-15.3% to -2.2%)     |
| South Sudan  | Non-venomous animal contact                     | 6 (3 to 12)      | 6 (3 to 11)      | -10.9% (-14.9% to -7.1%)  |
| South Sudan  | Other exposure to mechanical forces             | 36 (18 to 66)    | 33 (16 to 61)    | -7.8% (-12.1% to -3.5%)   |
| South Sudan  | Other road injuries                             | 2 (1 to 4)       | 2 (1 to 3)       | -8.5% (-16% to -0.3%)     |
| South Sudan  | Other transport injuries                        | 3 (2 to 4)       | 3 (2 to 4)       | -4% (-8.2% to 0.5%)       |
| South Sudan  | Other unintentional injuries                    | 3 (2 to 5)       | 3 (2 to 5)       | -12.6% (-16.4% to -8.5%)  |
| South Sudan  | Pedestrian road injuries                        | 80 (60 to 105)   | 65 (48 to 85)    | -19.2% (-24.3% to -13.9%) |
| South Sudan  | Physical violence by firearm                    | 0 (0 to 0)       | 0 (0 to 0)       | 55.5% (41.7% to 71.1%)    |
| South Sudan  | Physical violence by other means                | 9 (6 to 14)      | 13 (9 to 20)     | 49.4% (37.3% to 62.5%)    |
| South Sudan  | Physical violence by sharp object               | 2 (1 to 4)       | 4 (2 to 7)       | 50.4% (37.2% to 65%)      |
| South Sudan  | Poisoning by carbon monoxide                    | 0 (0 to 0)       | 0 (0 to 0)       | 3.4% (-5.3% to 13.9%)     |
| South Sudan  | Poisoning by other means                        | 0 (0 to 0)       | 0 (0 to 0)       | -15.7% (-21.9% to -9.9%)  |
| South Sudan  | Pulmonary aspiration and foreign body in airway | 0 (0 to 0)       | 0 (0 to 0)       | -6.7% (-16.8% to 3.6%)    |
| South Sudan  | Self-harm by firearm                            | 0 (0 to 0)       | 0 (0 to 0)       | -6% (-12.1% to 1.1%)      |
| South Sudan  | Self-harm by other specified means              | 0 (0 to 0)       | 0 (0 to 0)       | -12.2% (-17.5% to -6.8%)  |
| South Sudan  | Unintentional firearm injuries                  | 1 (0 to 2)       | 1 (0 to 2)       | -12.6% (-18.6% to -6.7%)  |
| South Sudan  | Venomous animal contact                         | 1 (0 to 3)       | 1 (0 to 3)       | -9.9% (-16.8% to -3.5%)   |
| Spain        | Adverse effects of medical treatment            | 0 (0 to 0)       | 0 (0 to 0)       | 0% (0% to 0%)             |
| Spain        | Conflict and terrorism                          | 1 (0 to 2)       | 0 (0 to 0)       | NA                        |
| Spain        | Cyclist road injuries                           | 27 (19 to 37)    | 19 (14 to 26)    | -30% (-40.6% to -17%)     |
| Spain        | Drowning                                        | 0 (0 to 0)       | 0 (0 to 0)       | 35.7% (21.1% to 49%)      |
| Spain        | Environmental heat and cold exposure            | 2 (2 to 3)       | 2 (1 to 3)       | -1.6% (-6.2% to 2.9%)     |
| Spain        | Executions and police conflict                  | 0 (0 to 0)       | 0 (0 to 0)       | NA                        |
| Spain        | Exposure to forces of nature                    | 0 (0 to 0)       | 0 (0 to 0)       | NA                        |
| Spain        | Falls                                           | 184 (143 to 240) | 227 (174 to 296) | 23% (15.3% to 31.3%)      |
| Spain        | Fire, heat, and hot substances                  | 2 (1 to 3)       | 2 (1 to 3)       | -4.6% (-9.2% to 1.1%)     |
| Spain        | Foreign body in eyes                            | 0 (0 to 0)       | 0 (0 to 0)       | 0.4% (0.1% to 0.8%)       |
| Spain        | Foreign body in other body part                 | 2 (1 to 3)       | 2 (1 to 3)       | 2.1% (-2.1% to 6.8%)      |

|           |                                                 |                 |                  |                           |
|-----------|-------------------------------------------------|-----------------|------------------|---------------------------|
| Spain     | Motor vehicle road injuries                     | 63 (49 to 78)   | 21 (15 to 27)    | -66.7% (-72.3% to -60.6%) |
| Spain     | Motorcyclist road injuries                      | 16 (12 to 21)   | 10 (7 to 13)     | -42.1% (-53% to -29.2%)   |
| Spain     | Non-venomous animal contact                     | 3 (1 to 4)      | 2 (1 to 4)       | -14.1% (-18.7% to -9.9%)  |
| Spain     | Other exposure to mechanical forces             | 52 (32 to 82)   | 43 (25 to 69)    | -18% (-26.5% to -10.7%)   |
| Spain     | Other road injuries                             | 2 (1 to 3)      | 1 (1 to 2)       | -27.1% (-38.9% to -13.2%) |
| Spain     | Other transport injuries                        | 5 (4 to 7)      | 5 (3 to 7)       | -11.6% (-17.2% to -5.5%)  |
| Spain     | Other unintentional injuries                    | 31 (20 to 49)   | 21 (13 to 34)    | -30.7% (-37.5% to -24.3%) |
| Spain     | Pedestrian road injuries                        | 18 (14 to 23)   | 7 (5 to 9)       | -64% (-70.5% to -56.4%)   |
| Spain     | Physical violence by firearm                    | 0 (0 to 1)      | 1 (0 to 1)       | 43.4% (28.2% to 60.7%)    |
| Spain     | Physical violence by other means                | 12 (8 to 17)    | 11 (7 to 16)     | -12.4% (-20.4% to -5.1%)  |
| Spain     | Physical violence by sharp object               | 1 (1 to 2)      | 1 (1 to 2)       | -8.4% (-20.3% to 2%)      |
| Spain     | Poisoning by carbon monoxide                    | 0 (0 to 0)      | 0 (0 to 0)       | 1.8% (-7.6% to 10.9%)     |
| Spain     | Poisoning by other means                        | 0 (0 to 0)      | 0 (0 to 0)       | -10.7% (-17.3% to -4.7%)  |
| Spain     | Pulmonary aspiration and foreign body in airway | 1 (1 to 2)      | 1 (1 to 2)       | -11% (-20.4% to -1.5%)    |
| Spain     | Self-harm by firearm                            | 0 (0 to 0)      | 0 (0 to 0)       | 7.3% (-5.5% to 21.6%)     |
| Spain     | Self-harm by other specified means              | 2 (1 to 3)      | 2 (1 to 2)       | -11.5% (-16.6% to -6%)    |
| Spain     | Unintentional firearm injuries                  | 1 (1 to 2)      | 1 (1 to 2)       | -27.2% (-37.8% to -17.8%) |
| Spain     | Venomous animal contact                         | 1 (0 to 2)      | 1 (0 to 2)       | -14.3% (-19.5% to -8.8%)  |
| Sri Lanka | Adverse effects of medical treatment            | 0 (0 to 0)      | 0 (0 to 0)       | 0% (0% to 0%)             |
| Sri Lanka | Conflict and terrorism                          | 214 (86 to 487) | 8 (3 to 18)      | NA                        |
| Sri Lanka | Cyclist road injuries                           | 13 (9 to 18)    | 13 (9 to 19)     | 3.6% (-5.3% to 13.6%)     |
| Sri Lanka | Drowning                                        | 0 (0 to 1)      | 1 (0 to 1)       | 25.3% (13.4% to 38.4%)    |
| Sri Lanka | Environmental heat and cold exposure            | 2 (2 to 3)      | 2 (1 to 3)       | -16.4% (-22.6% to -9.3%)  |
| Sri Lanka | Executions and police conflict                  | 0 (0 to 0)      | 0 (0 to 0)       | NA                        |
| Sri Lanka | Exposure to forces of nature                    | 1 (1 to 2)      | 0 (0 to 0)       | NA                        |
| Sri Lanka | Falls                                           | 86 (69 to 109)  | 130 (104 to 160) | 49.9% (42.8% to 57.2%)    |
| Sri Lanka | Fire, heat, and hot substances                  | 2 (1 to 3)      | 1 (1 to 3)       | -27% (-32.7% to -21.6%)   |
| Sri Lanka | Foreign body in eyes                            | 0 (0 to 0)      | 0 (0 to 0)       | -2.2% (-3.5% to -1.3%)    |
| Sri Lanka | Foreign body in other body part                 | 1 (1 to 2)      | 1 (1 to 2)       | -5.3% (-9.2% to -0.8%)    |
| Sri Lanka | Motor vehicle road injuries                     | 21 (16 to 28)   | 23 (17 to 30)    | 6.5% (-2.1% to 16.5%)     |
| Sri Lanka | Motorcyclist road injuries                      | 30 (23 to 38)   | 34 (27 to 43)    | 14.9% (5.4% to 27%)       |
| Sri Lanka | Non-venomous animal contact                     | 7 (4 to 12)     | 4 (2 to 7)       | -45.8% (-51.2% to -39.8%) |
| Sri Lanka | Other exposure to mechanical forces             | 25 (15 to 40)   | 19 (11 to 31)    | -23% (-30% to -16.5%)     |
| Sri Lanka | Other road injuries                             | 1 (1 to 2)      | 1 (1 to 2)       | 2.7% (-6.9% to 12.6%)     |
| Sri Lanka | Other transport injuries                        | 5 (3 to 7)      | 5 (3 to 7)       | 7.2% (-0.1% to 15.5%)     |
| Sri Lanka | Other unintentional injuries                    | 18 (12 to 28)   | 10 (6 to 16)     | -44.8% (-51.3% to -37.5%) |
| Sri Lanka | Pedestrian road injuries                        | 16 (12 to 20)   | 14 (11 to 18)    | -11.3% (-17.7% to -4%)    |
| Sri Lanka | Physical violence by firearm                    | 0 (0 to 0)      | 0 (0 to 1)       | 34.1% (15.9% to 54.1%)    |
| Sri Lanka | Physical violence by other means                | 27 (19 to 38)   | 20 (14 to 29)    | -25.9% (-32.6% to -19.7%) |
| Sri Lanka | Physical violence by sharp object               | 4 (3 to 6)      | 3 (2 to 4)       | -33.5% (-42.2% to -24.9%) |
| Sri Lanka | Poisoning by carbon monoxide                    | 0 (0 to 0)      | 0 (0 to 0)       | 9.4% (-2.5% to 22.2%)     |
| Sri Lanka | Poisoning by other means                        | 0 (0 to 0)      | 0 (0 to 0)       | -25.7% (-34.1% to -17%)   |
| Sri Lanka | Pulmonary aspiration and foreign body in airway | 0 (0 to 0)      | 0 (0 to 0)       | -5.3% (-13.7% to 4.5%)    |



|           |                                                 |                 |               |                           |
|-----------|-------------------------------------------------|-----------------|---------------|---------------------------|
| Sri Lanka | Self-harm by firearm                            | 0 (0 to 0)      | 0 (0 to 0)    | -37.8% (-54.1% to -19.2%) |
| Sri Lanka | Self-harm by other specified means              | 8 (5 to 12)     | 4 (3 to 7)    | -44.5% (-48.2% to -40.4%) |
| Sri Lanka | Unintentional firearm injuries                  | 4 (2 to 6)      | 2 (1 to 4)    | -41% (-50% to -32.8%)     |
| Sri Lanka | Venomous animal contact                         | 2 (1 to 4)      | 1 (0 to 2)    | -51.1% (-57.5% to -44.4%) |
| Sudan     | Adverse effects of medical treatment            | 0 (0 to 0)      | 0 (0 to 0)    | 0% (0% to 0%)             |
| Sudan     | Conflict and terrorism                          | 119 (37 to 307) | 1 (0 to 3)    | NA                        |
| Sudan     | Cyclist road injuries                           | 7 (4 to 11)     | 7 (5 to 11)   | 4.8% (-2.7% to 13.8%)     |
| Sudan     | Drowning                                        | 0 (0 to 0)      | 0 (0 to 0)    | -11.6% (-21% to -0.6%)    |
| Sudan     | Environmental heat and cold exposure            | 0 (0 to 1)      | 1 (0 to 1)    | 2.9% (-3.9% to 10.6%)     |
| Sudan     | Executions and police conflict                  | 0 (0 to 0)      | 2 (1 to 5)    | NA                        |
| Sudan     | Exposure to forces of nature                    | 0 (0 to 0)      | 0 (0 to 0)    | NA                        |
| Sudan     | Falls                                           | 33 (20 to 51)   | 40 (25 to 62) | 21.4% (15.8% to 27%)      |
| Sudan     | Fire, heat, and hot substances                  | 0 (0 to 0)      | 0 (0 to 0)    | -33% (-37.9% to -28.4%)   |
| Sudan     | Foreign body in eyes                            | 0 (0 to 0)      | 0 (0 to 0)    | 0.5% (0% to 1.1%)         |
| Sudan     | Foreign body in other body part                 | 2 (1 to 3)      | 2 (1 to 3)    | -1.5% (-5.7% to 3.1%)     |
| Sudan     | Motor vehicle road injuries                     | 31 (22 to 42)   | 28 (20 to 38) | -8.9% (-14.8% to -2.7%)   |
| Sudan     | Motorcyclist road injuries                      | 12 (8 to 16)    | 12 (8 to 16)  | -1.2% (-9.3% to 7.7%)     |
| Sudan     | Non-venomous animal contact                     | 3 (1 to 5)      | 2 (1 to 5)    | -8.4% (-13.1% to -2.8%)   |
| Sudan     | Other exposure to mechanical forces             | 39 (20 to 70)   | 34 (18 to 63) | -10.6% (-16.7% to -5.5%)  |
| Sudan     | Other road injuries                             | 1 (1 to 2)      | 1 (1 to 3)    | 12.2% (3.9% to 23.1%)     |
| Sudan     | Other transport injuries                        | 2 (2 to 3)      | 2 (2 to 3)    | 1.7% (-4.3% to 7.6%)      |
| Sudan     | Other unintentional injuries                    | 7 (4 to 12)     | 5 (3 to 9)    | -24.7% (-28.7% to -20.2%) |
| Sudan     | Pedestrian road injuries                        | 23 (17 to 31)   | 18 (13 to 25) | -21% (-26.5% to -15.1%)   |
| Sudan     | Physical violence by firearm                    | 0 (0 to 0)      | 0 (0 to 1)    | 169.7% (127.7% to 235.4%) |
| Sudan     | Physical violence by other means                | 7 (5 to 11)     | 12 (8 to 19)  | 75.9% (55.4% to 100.8%)   |
| Sudan     | Physical violence by sharp object               | 1 (0 to 2)      | 1 (1 to 3)    | 40.9% (18.9% to 71.6%)    |
| Sudan     | Poisoning by carbon monoxide                    | 0 (0 to 0)      | 0 (0 to 0)    | 17.2% (2.8% to 33.6%)     |
| Sudan     | Poisoning by other means                        | 0 (0 to 0)      | 0 (0 to 0)    | -29.4% (-36.6% to -22.1%) |
| Sudan     | Pulmonary aspiration and foreign body in airway | 0 (0 to 0)      | 0 (0 to 0)    | -30.4% (-39.3% to -21.8%) |
| Sudan     | Self-harm by firearm                            | 0 (0 to 0)      | 0 (0 to 0)    | 21.9% (12.8% to 31.9%)    |
| Sudan     | Self-harm by other specified means              | 0 (0 to 0)      | 0 (0 to 0)    | -1.4% (-8% to 5.6%)       |
| Sudan     | Unintentional firearm injuries                  | 1 (0 to 2)      | 1 (0 to 1)    | -12.3% (-20.6% to -3.4%)  |
| Sudan     | Venomous animal contact                         | 1 (0 to 2)      | 1 (0 to 2)    | -12.2% (-19.7% to -5.3%)  |
| Suriname  | Adverse effects of medical treatment            | 0 (0 to 0)      | 0 (0 to 0)    | 0% (0% to 0%)             |
| Suriname  | Conflict and terrorism                          | 0 (0 to 0)      | 0 (0 to 0)    | NA                        |
| Suriname  | Cyclist road injuries                           | 36 (26 to 49)   | 30 (21 to 40) | -18.3% (-26.9% to -8.6%)  |
| Suriname  | Drowning                                        | 0 (0 to 1)      | 0 (0 to 1)    | 6.6% (-3.3% to 18.3%)     |
| Suriname  | Environmental heat and cold exposure            | 13 (9 to 18)    | 14 (10 to 19) | 5.8% (1.5% to 9.8%)       |
| Suriname  | Executions and police conflict                  | 0 (0 to 0)      | 0 (0 to 0)    | NA                        |
| Suriname  | Exposure to forces of nature                    | 0 (0 to 0)      | 0 (0 to 0)    | NA                        |
| Suriname  | Falls                                           | 43 (34 to 55)   | 63 (49 to 81) | 46% (40.4% to 51.5%)      |
| Suriname  | Fire, heat, and hot substances                  | 4 (3 to 7)      | 4 (2 to 6)    | -10.7% (-17% to -3.9%)    |
| Suriname  | Foreign body in eyes                            | 0 (0 to 0)      | 0 (0 to 0)    | -0.5% (-1.1% to -0.1%)    |

|          |                                                 |                 |                 |                           |
|----------|-------------------------------------------------|-----------------|-----------------|---------------------------|
| Suriname | Foreign body in other body part                 | 2 (1 to 3)      | 2 (1 to 3)      | 4.1% (-3.7% to 10.4%)     |
| Suriname | Motor vehicle road injuries                     | 37 (27 to 47)   | 34 (25 to 43)   | -8.7% (-17.5% to 0.9%)    |
| Suriname | Motorcyclist road injuries                      | 21 (16 to 27)   | 27 (21 to 35)   | 31.9% (17% to 48.9%)      |
| Suriname | Non-venomous animal contact                     | 3 (1 to 5)      | 3 (2 to 5)      | 7% (-0.9% to 14.8%)       |
| Suriname | Other exposure to mechanical forces             | 32 (19 to 52)   | 37 (22 to 61)   | 15.3% (8.2% to 22.7%)     |
| Suriname | Other road injuries                             | 4 (2 to 6)      | 4 (2 to 6)      | 3% (-8.1% to 15.3%)       |
| Suriname | Other transport injuries                        | 5 (3 to 6)      | 5 (4 to 7)      | 10.5% (4.1% to 17.1%)     |
| Suriname | Other unintentional injuries                    | 12 (7 to 19)    | 12 (8 to 20)    | 2.4% (-3% to 7.3%)        |
| Suriname | Pedestrian road injuries                        | 15 (11 to 19)   | 12 (9 to 15)    | -20.3% (-27.6% to -12.2%) |
| Suriname | Physical violence by firearm                    | 0 (0 to 1)      | 1 (1 to 1)      | 86.4% (68.5% to 106.7%)   |
| Suriname | Physical violence by other means                | 11 (8 to 16)    | 12 (9 to 18)    | 13.3% (5.5% to 21.4%)     |
| Suriname | Physical violence by sharp object               | 3 (2 to 5)      | 3 (2 to 6)      | 12.4% (1.3% to 23.4%)     |
| Suriname | Poisoning by carbon monoxide                    | 0 (0 to 0)      | 0 (0 to 0)      | 26% (11.1% to 42.4%)      |
| Suriname | Poisoning by other means                        | 0 (0 to 0)      | 0 (0 to 0)      | -15.2% (-25.3% to -4.7%)  |
| Suriname | Pulmonary aspiration and foreign body in airway | 1 (0 to 1)      | 0 (0 to 1)      | -24.9% (-33.1% to -14.4%) |
| Suriname | Self-harm by firearm                            | 1 (0 to 1)      | 1 (0 to 1)      | 13.8% (-1.7% to 30.2%)    |
| Suriname | Self-harm by other specified means              | 2 (1 to 3)      | 2 (1 to 3)      | 2.9% (-4.5% to 10.9%)     |
| Suriname | Unintentional firearm injuries                  | 4 (2 to 6)      | 4 (2 to 6)      | 10.9% (0.6% to 21.7%)     |
| Suriname | Venomous animal contact                         | 5 (3 to 9)      | 6 (3 to 11)     | 19.4% (11.6% to 30.2%)    |
| Sweden   | Adverse effects of medical treatment            | 0 (0 to 0)      | 0 (0 to 0)      | 0% (0% to 0%)             |
| Sweden   | Conflict and terrorism                          | 0 (0 to 0)      | 0 (0 to 0)      | NA                        |
| Sweden   | Cyclist road injuries                           | 19 (12 to 27)   | 12 (7 to 18)    | -36.8% (-41.6% to -32.1%) |
| Sweden   | Drowning                                        | 0 (0 to 0)      | 0 (0 to 0)      | -7.5% (-13.4% to -0.8%)   |
| Sweden   | Environmental heat and cold exposure            | 1 (0 to 1)      | 1 (0 to 1)      | -13.1% (-17.4% to -8.8%)  |
| Sweden   | Executions and police conflict                  | 0 (0 to 0)      | 0 (0 to 0)      | NA                        |
| Sweden   | Exposure to forces of nature                    | 0 (0 to 0)      | 0 (0 to 0)      | NA                        |
| Sweden   | Falls                                           | 117 (75 to 174) | 129 (83 to 194) | 10.5% (7% to 13.8%)       |
| Sweden   | Fire, heat, and hot substances                  | 1 (0 to 1)      | 0 (0 to 1)      | -22.2% (-26% to -18.1%)   |
| Sweden   | Foreign body in eyes                            | 0 (0 to 0)      | 0 (0 to 0)      | 0% (-0.5% to 0.8%)        |
| Sweden   | Foreign body in other body part                 | 2 (1 to 5)      | 2 (1 to 5)      | 0.7% (-2.8% to 4.4%)      |
| Sweden   | Motor vehicle road injuries                     | 35 (24 to 48)   | 17 (11 to 25)   | -51% (-54.8% to -47.1%)   |
| Sweden   | Motorcyclist road injuries                      | 12 (8 to 17)    | 9 (6 to 13)     | -19% (-24.6% to -12.6%)   |
| Sweden   | Non-venomous animal contact                     | 2 (1 to 4)      | 2 (1 to 3)      | -10% (-13.1% to -6.8%)    |
| Sweden   | Other exposure to mechanical forces             | 90 (45 to 164)  | 77 (38 to 141)  | -14.6% (-19.4% to -10.6%) |
| Sweden   | Other road injuries                             | 2 (1 to 3)      | 2 (1 to 3)      | -14.9% (-21.3% to -7.7%)  |
| Sweden   | Other transport injuries                        | 4 (3 to 5)      | 3 (2 to 4)      | -27.6% (-31.7% to -22.5%) |
| Sweden   | Other unintentional injuries                    | 8 (5 to 15)     | 8 (4 to 15)     | -3% (-6.5% to 0.4%)       |
| Sweden   | Pedestrian road injuries                        | 8 (5 to 12)     | 6 (4 to 8)      | -29.1% (-35.2% to -22.8%) |
| Sweden   | Physical violence by firearm                    | 0 (0 to 1)      | 1 (0 to 1)      | 30.1% (19.4% to 41.8%)    |
| Sweden   | Physical violence by other means                | 19 (12 to 28)   | 20 (13 to 29)   | 4.7% (-0.3% to 9.1%)      |
| Sweden   | Physical violence by sharp object               | 2 (1 to 4)      | 2 (1 to 4)      | -4% (-11% to 2.6%)        |
| Sweden   | Poisoning by carbon monoxide                    | 0 (0 to 0)      | 0 (0 to 0)      | 12.9% (4.2% to 22.6%)     |
| Sweden   | Poisoning by other means                        | 0 (0 to 0)      | 0 (0 to 0)      | -33% (-39.2% to -27.5%)   |

|                      |                                                 |                  |                  |                           |
|----------------------|-------------------------------------------------|------------------|------------------|---------------------------|
| Sweden               | Pulmonary aspiration and foreign body in airway | 0 (0 to 1)       | 0 (0 to 1)       | -15.4% (-21.6% to -8.4%)  |
| Sweden               | Self-harm by firearm                            | 0 (0 to 0)       | 0 (0 to 0)       | -35% (-40.3% to -30.3%)   |
| Sweden               | Self-harm by other specified means              | 1 (0 to 1)       | 0 (0 to 1)       | -23.6% (-27.4% to -19.4%) |
| Sweden               | Unintentional firearm injuries                  | 1 (0 to 1)       | 1 (0 to 1)       | 2.6% (-4.6% to 9.8%)      |
| Sweden               | Venomous animal contact                         | 0 (0 to 1)       | 0 (0 to 1)       | -9.6% (-14.7% to -4.3%)   |
| Switzerland          | Adverse effects of medical treatment            | 0 (0 to 0)       | 0 (0 to 0)       | 0% (0% to 0%)             |
| Switzerland          | Conflict and terrorism                          | 0 (0 to 0)       | 0 (0 to 0)       | NA                        |
| Switzerland          | Cyclist road injuries                           | 34 (25 to 45)    | 21 (15 to 29)    | -37.5% (-45.7% to -28.3%) |
| Switzerland          | Drowning                                        | 0 (0 to 0)       | 0 (0 to 0)       | 33.7% (19.5% to 46.7%)    |
| Switzerland          | Environmental heat and cold exposure            | 2 (1 to 2)       | 2 (1 to 2)       | 1.8% (-2.5% to 7%)        |
| Switzerland          | Executions and police conflict                  | 0 (0 to 0)       | 0 (0 to 0)       | NA                        |
| Switzerland          | Exposure to forces of nature                    | 0 (0 to 0)       | 0 (0 to 0)       | NA                        |
| Switzerland          | Falls                                           | 407 (326 to 517) | 365 (286 to 466) | -10.4% (-15% to -5.9%)    |
| Switzerland          | Fire, heat, and hot substances                  | 2 (1 to 4)       | 2 (1 to 4)       | 2.6% (-2.8% to 7.6%)      |
| Switzerland          | Foreign body in eyes                            | 0 (0 to 0)       | 0 (0 to 0)       | 0.5% (0.1% to 1.1%)       |
| Switzerland          | Foreign body in other body part                 | 1 (1 to 3)       | 1 (1 to 3)       | 5.2% (0% to 10.3%)        |
| Switzerland          | Motor vehicle road injuries                     | 39 (29 to 50)    | 20 (15 to 26)    | -48.3% (-55.4% to -39.9%) |
| Switzerland          | Motorcyclist road injuries                      | 21 (16 to 26)    | 11 (8 to 14)     | -48.9% (-57.1% to -39.9%) |
| Switzerland          | Non-venomous animal contact                     | 3 (2 to 5)       | 3 (2 to 5)       | 3.4% (-1.7% to 8.6%)      |
| Switzerland          | Other exposure to mechanical forces             | 81 (51 to 127)   | 56 (34 to 89)    | -30.6% (-39.1% to -23.3%) |
| Switzerland          | Other road injuries                             | 1 (1 to 2)       | 1 (1 to 2)       | -24.5% (-34.5% to -12.3%) |
| Switzerland          | Other transport injuries                        | 8 (6 to 10)      | 5 (4 to 7)       | -32.6% (-39.1% to -24.2%) |
| Switzerland          | Other unintentional injuries                    | 36 (25 to 54)    | 21 (13 to 34)    | -42.1% (-49.9% to -34.9%) |
| Switzerland          | Pedestrian road injuries                        | 12 (9 to 15)     | 7 (5 to 9)       | -45.1% (-53.8% to -35.5%) |
| Switzerland          | Physical violence by firearm                    | 1 (0 to 1)       | 1 (0 to 1)       | 16.1% (1.5% to 33.2%)     |
| Switzerland          | Physical violence by other means                | 16 (11 to 23)    | 13 (9 to 19)     | -16.9% (-24.3% to -9.3%)  |
| Switzerland          | Physical violence by sharp object               | 2 (1 to 3)       | 1 (1 to 2)       | -17.2% (-26.6% to -7.4%)  |
| Switzerland          | Poisoning by carbon monoxide                    | 0 (0 to 0)       | 0 (0 to 0)       | 16.2% (7% to 25.2%)       |
| Switzerland          | Poisoning by other means                        | 0 (0 to 0)       | 0 (0 to 0)       | 6.1% (-1% to 13.2%)       |
| Switzerland          | Pulmonary aspiration and foreign body in airway | 1 (0 to 1)       | 1 (0 to 1)       | 2.8% (-6% to 12.9%)       |
| Switzerland          | Self-harm by firearm                            | 1 (1 to 2)       | 0 (0 to 1)       | -67.3% (-72.8% to -61.8%) |
| Switzerland          | Self-harm by other specified means              | 5 (3 to 8)       | 3 (2 to 4)       | -44.3% (-48.2% to -40.2%) |
| Switzerland          | Unintentional firearm injuries                  | 1 (1 to 2)       | 1 (0 to 2)       | -25% (-36.4% to -14.1%)   |
| Switzerland          | Venomous animal contact                         | 1 (0 to 2)       | 1 (0 to 2)       | -1.2% (-7.2% to 5.1%)     |
| Syrian Arab Republic | Adverse effects of medical treatment            | 0 (0 to 0)       | 0 (0 to 0)       | 0% (0% to 0%)             |
| Syrian Arab Republic | Conflict and terrorism                          | 3 (1 to 6)       | 180 (68 to 394)  | NA                        |
| Syrian Arab Republic | Cyclist road injuries                           | 14 (10 to 20)    | 13 (9 to 18)     | -7.4% (-14.3% to 0.4%)    |
| Syrian Arab Republic | Drowning                                        | 0 (0 to 0)       | 0 (0 to 0)       | 102.1% (67.5% to 142.3%)  |
| Syrian Arab Republic | Environmental heat and cold exposure            | 3 (2 to 4)       | 3 (2 to 4)       | -4.2% (-9.2% to 1.1%)     |
| Syrian Arab Republic | Executions and police conflict                  | 0 (0 to 0)       | 5 (2 to 11)      | NA                        |
| Syrian Arab Republic | Exposure to forces of nature                    | 0 (0 to 0)       | 0 (0 to 0)       | NA                        |
| Syrian Arab Republic | Falls                                           | 70 (53 to 93)    | 102 (76 to 139)  | 46.6% (40% to 53.9%)      |
| Syrian Arab Republic | Fire, heat, and hot substances                  | 1 (0 to 1)       | 1 (0 to 1)       | -14.2% (-25.2% to -3%)    |

|                            |                                                 |                 |               |                           |
|----------------------------|-------------------------------------------------|-----------------|---------------|---------------------------|
| Syrian Arab Republic       | Foreign body in eyes                            | 0 (0 to 0)      | 0 (0 to 0)    | -1.8% (-3.5% to -0.8%)    |
| Syrian Arab Republic       | Foreign body in other body part                 | 1 (1 to 3)      | 1 (1 to 3)    | -4.9% (-9.6% to 0.2%)     |
| Syrian Arab Republic       | Motor vehicle road injuries                     | 24 (19 to 31)   | 19 (15 to 25) | -21.6% (-27.6% to -15%)   |
| Syrian Arab Republic       | Motorcyclist road injuries                      | 8 (6 to 11)     | 7 (6 to 10)   | -8.2% (-16.5% to 0.6%)    |
| Syrian Arab Republic       | Non-venomous animal contact                     | 4 (2 to 8)      | 4 (2 to 8)    | 4.3% (-1.2% to 9%)        |
| Syrian Arab Republic       | Other exposure to mechanical forces             | 21 (13 to 35)   | 20 (12 to 34) | -4.9% (-14.8% to 3.8%)    |
| Syrian Arab Republic       | Other road injuries                             | 2 (1 to 3)      | 2 (1 to 3)    | -5.4% (-14.1% to 3.9%)    |
| Syrian Arab Republic       | Other transport injuries                        | 6 (4 to 8)      | 6 (4 to 8)    | -2.6% (-8.1% to 2.7%)     |
| Syrian Arab Republic       | Other unintentional injuries                    | 17 (11 to 28)   | 16 (10 to 27) | -6.6% (-15.4% to 2.7%)    |
| Syrian Arab Republic       | Pedestrian road injuries                        | 19 (15 to 24)   | 14 (11 to 18) | -28.8% (-33.6% to -22.6%) |
| Syrian Arab Republic       | Physical violence by firearm                    | 0 (0 to 0)      | 1 (0 to 1)    | 167% (134.9% to 203.3%)   |
| Syrian Arab Republic       | Physical violence by other means                | 10 (7 to 14)    | 11 (8 to 16)  | 9.9% (2% to 17%)          |
| Syrian Arab Republic       | Physical violence by sharp object               | 2 (1 to 3)      | 2 (1 to 3)    | 0% (-10% to 10.6%)        |
| Syrian Arab Republic       | Poisoning by carbon monoxide                    | 0 (0 to 0)      | 0 (0 to 0)    | 39.5% (25.3% to 54.9%)    |
| Syrian Arab Republic       | Poisoning by other means                        | 0 (0 to 0)      | 0 (0 to 0)    | -9.8% (-17.8% to -1%)     |
| Syrian Arab Republic       | Pulmonary aspiration and foreign body in airway | 0 (0 to 1)      | 0 (0 to 1)    | -21.3% (-30.4% to -12.5%) |
| Syrian Arab Republic       | Self-harm by firearm                            | 0 (0 to 0)      | 0 (0 to 0)    | 26.5% (13.7% to 41.7%)    |
| Syrian Arab Republic       | Self-harm by other specified means              | 1 (0 to 1)      | 1 (0 to 1)    | 13.8% (7.2% to 20.5%)     |
| Syrian Arab Republic       | Unintentional firearm injuries                  | 2 (1 to 3)      | 2 (1 to 3)    | -6% (-19.7% to 8.5%)      |
| Syrian Arab Republic       | Venomous animal contact                         | 2 (1 to 5)      | 3 (1 to 5)    | 6.1% (-0.8% to 13%)       |
| Taiwan (Province of China) | Adverse effects of medical treatment            | 0 (0 to 0)      | 0 (0 to 0)    | 0% (0% to 0%)             |
| Taiwan (Province of China) | Conflict and terrorism                          | 0 (0 to 0)      | 0 (0 to 0)    | NA                        |
| Taiwan (Province of China) | Cyclist road injuries                           | 12 (8 to 18)    | 17 (12 to 23) | 34.6% (13.4% to 62.6%)    |
| Taiwan (Province of China) | Drowning                                        | 1 (0 to 1)      | 1 (0 to 1)    | 3.2% (-10.7% to 24.1%)    |
| Taiwan (Province of China) | Environmental heat and cold exposure            | 2 (2 to 4)      | 3 (2 to 4)    | 5.6% (-0.3% to 12.3%)     |
| Taiwan (Province of China) | Executions and police conflict                  | 0 (0 to 0)      | 0 (0 to 0)    | NA                        |
| Taiwan (Province of China) | Exposure to forces of nature                    | 0 (0 to 0)      | 0 (0 to 0)    | NA                        |
| Taiwan (Province of China) | Falls                                           | 106 (85 to 134) | 69 (56 to 87) | -34.7% (-38% to -31.4%)   |
| Taiwan (Province of China) | Fire, heat, and hot substances                  | 1 (1 to 2)      | 1 (0 to 1)    | -43.2% (-52.6% to -34.8%) |
| Taiwan (Province of China) | Foreign body in eyes                            | 0 (0 to 0)      | 0 (0 to 0)    | -1.8% (-3.1% to -0.9%)    |
| Taiwan (Province of China) | Foreign body in other body part                 | 0 (0 to 1)      | 0 (0 to 1)    | 3.7% (-1.9% to 10.1%)     |
| Taiwan (Province of China) | Motor vehicle road injuries                     | 49 (39 to 61)   | 15 (11 to 20) | -69.5% (-74.5% to -63.9%) |
| Taiwan (Province of China) | Motorcyclist road injuries                      | 23 (18 to 30)   | 35 (28 to 42) | 49% (26.1% to 78.5%)      |
| Taiwan (Province of China) | Non-venomous animal contact                     | 1 (1 to 2)      | 1 (0 to 1)    | -23.6% (-27.7% to -18.7%) |
| Taiwan (Province of China) | Other exposure to mechanical forces             | 5 (3 to 8)      | 7 (4 to 11)   | 36.2% (25.2% to 47.1%)    |
| Taiwan (Province of China) | Other road injuries                             | 1 (0 to 1)      | 2 (1 to 3)    | 93.9% (59% to 142.4%)     |
| Taiwan (Province of China) | Other transport injuries                        | 4 (3 to 5)      | 4 (3 to 6)    | 13.5% (7% to 21.2%)       |
| Taiwan (Province of China) | Other unintentional injuries                    | 11 (8 to 16)    | 3 (2 to 5)    | -71% (-77.2% to -64.5%)   |
| Taiwan (Province of China) | Pedestrian road injuries                        | 15 (11 to 19)   | 12 (9 to 15)  | -17.7% (-29.5% to -3.9%)  |
| Taiwan (Province of China) | Physical violence by firearm                    | 0 (0 to 1)      | 1 (0 to 1)    | 39.3% (22.4% to 57.5%)    |
| Taiwan (Province of China) | Physical violence by other means                | 21 (15 to 29)   | 16 (12 to 23) | -21.7% (-31.1% to -12.1%) |
| Taiwan (Province of China) | Physical violence by sharp object               | 4 (3 to 7)      | 2 (1 to 4)    | -51.8% (-61.9% to -40.5%) |
| Taiwan (Province of China) | Poisoning by carbon monoxide                    | 0 (0 to 0)      | 0 (0 to 0)    | 64.5% (38% to 98.2%)      |

|                            |                                                 |                  |                 |                           |
|----------------------------|-------------------------------------------------|------------------|-----------------|---------------------------|
| Taiwan (Province of China) | Poisoning by other means                        | 0 (0 to 0)       | 0 (0 to 0)      | -42.5% (-56.3% to -28%)   |
| Taiwan (Province of China) | Pulmonary aspiration and foreign body in airway | 0 (0 to 0)       | 0 (0 to 0)      | -18.4% (-31.5% to -3.3%)  |
| Taiwan (Province of China) | Self-harm by firearm                            | 1 (0 to 1)       | 1 (0 to 1)      | 37.1% (16% to 60.4%)      |
| Taiwan (Province of China) | Self-harm by other specified means              | 2 (1 to 3)       | 2 (2 to 4)      | 44.2% (34.5% to 54.2%)    |
| Taiwan (Province of China) | Unintentional firearm injuries                  | 1 (1 to 1)       | 1 (1 to 2)      | 7.4% (-5.2% to 19.1%)     |
| Taiwan (Province of China) | Venomous animal contact                         | 0 (0 to 1)       | 0 (0 to 1)      | -25% (-29.9% to -19.5%)   |
| Tajikistan                 | Adverse effects of medical treatment            | 0 (0 to 0)       | 0 (0 to 0)      | 0% (0% to 0%)             |
| Tajikistan                 | Conflict and terrorism                          | 0 (0 to 0)       | 0 (0 to 0)      | NA                        |
| Tajikistan                 | Cyclist road injuries                           | 22 (15 to 31)    | 17 (12 to 24)   | -20.7% (-27% to -13.9%)   |
| Tajikistan                 | Drowning                                        | 1 (0 to 1)       | 1 (0 to 1)      | -13.8% (-22.6% to -5.3%)  |
| Tajikistan                 | Environmental heat and cold exposure            | 5 (3 to 7)       | 5 (3 to 7)      | 1.7% (-3.5% to 7.7%)      |
| Tajikistan                 | Executions and police conflict                  | 0 (0 to 0)       | 0 (0 to 0)      | NA                        |
| Tajikistan                 | Exposure to forces of nature                    | 6 (4 to 11)      | 0 (0 to 0)      | NA                        |
| Tajikistan                 | Falls                                           | 145 (111 to 190) | 112 (84 to 149) | -22.5% (-26.7% to -18.1%) |
| Tajikistan                 | Fire, heat, and hot substances                  | 6 (3 to 9)       | 4 (2 to 6)      | -36.3% (-42.1% to -30.8%) |
| Tajikistan                 | Foreign body in eyes                            | 0 (0 to 0)       | 0 (0 to 0)      | 1.2% (0.6% to 2.1%)       |
| Tajikistan                 | Foreign body in other body part                 | 2 (1 to 4)       | 2 (1 to 4)      | 2.2% (-3.7% to 7.7%)      |
| Tajikistan                 | Motor vehicle road injuries                     | 56 (44 to 72)    | 41 (32 to 52)   | -27.5% (-32.3% to -22.3%) |
| Tajikistan                 | Motorcyclist road injuries                      | 6 (4 to 8)       | 3 (2 to 4)      | -45.5% (-51.7% to -39.2%) |
| Tajikistan                 | Non-venomous animal contact                     | 3 (2 to 5)       | 3 (2 to 6)      | 13% (7.1% to 19%)         |
| Tajikistan                 | Other exposure to mechanical forces             | 49 (30 to 79)    | 51 (31 to 81)   | 3.7% (-1.4% to 8.8%)      |
| Tajikistan                 | Other road injuries                             | 2 (1 to 3)       | 2 (1 to 3)      | -20.5% (-27.6% to -12.4%) |
| Tajikistan                 | Other transport injuries                        | 5 (4 to 7)       | 5 (3 to 7)      | -1.6% (-7.2% to 4.4%)     |
| Tajikistan                 | Other unintentional injuries                    | 22 (14 to 36)    | 21 (13 to 34)   | -7% (-13.4% to -2%)       |
| Tajikistan                 | Pedestrian road injuries                        | 16 (12 to 21)    | 13 (10 to 18)   | -18.2% (-24.6% to -11%)   |
| Tajikistan                 | Physical violence by firearm                    | 0 (0 to 0)       | 0 (0 to 0)      | -3.4% (-23.6% to 18.7%)   |
| Tajikistan                 | Physical violence by other means                | 26 (19 to 36)    | 12 (8 to 17)    | -55.5% (-60.8% to -50.1%) |
| Tajikistan                 | Physical violence by sharp object               | 3 (2 to 5)       | 2 (1 to 3)      | -49.5% (-57.8% to -39.6%) |
| Tajikistan                 | Poisoning by carbon monoxide                    | 0 (0 to 0)       | 0 (0 to 0)      | -13.2% (-33% to 6.9%)     |
| Tajikistan                 | Poisoning by other means                        | 0 (0 to 1)       | 0 (0 to 1)      | -16.3% (-29.1% to -3.9%)  |
| Tajikistan                 | Pulmonary aspiration and foreign body in airway | 1 (1 to 2)       | 1 (1 to 2)      | -1.4% (-9.8% to 7.4%)     |
| Tajikistan                 | Self-harm by firearm                            | 0 (0 to 0)       | 0 (0 to 0)      | 0.2% (-14.9% to 17.6%)    |
| Tajikistan                 | Self-harm by other specified means              | 1 (1 to 2)       | 1 (1 to 2)      | -6.1% (-10.6% to -1.4%)   |
| Tajikistan                 | Unintentional firearm injuries                  | 1 (0 to 1)       | 1 (0 to 1)      | -6% (-13.5% to 2.1%)      |
| Tajikistan                 | Venomous animal contact                         | 3 (1 to 5)       | 3 (1 to 6)      | 12.4% (6.5% to 19%)       |
| Thailand                   | Adverse effects of medical treatment            | 0 (0 to 0)       | 0 (0 to 0)      | 0% (0% to 0%)             |
| Thailand                   | Conflict and terrorism                          | 0 (0 to 1)       | 1 (0 to 1)      | NA                        |
| Thailand                   | Cyclist road injuries                           | 16 (11 to 24)    | 13 (8 to 19)    | -22.1% (-30.6% to -11.8%) |
| Thailand                   | Drowning                                        | 1 (0 to 1)       | 1 (0 to 1)      | 12.4% (1.7% to 24%)       |
| Thailand                   | Environmental heat and cold exposure            | 2 (1 to 2)       | 2 (1 to 3)      | 3.1% (-1.7% to 8.6%)      |
| Thailand                   | Executions and police conflict                  | 0 (0 to 0)       | 0 (0 to 0)      | NA                        |
| Thailand                   | Exposure to forces of nature                    | 0 (0 to 1)       | 0 (0 to 0)      | NA                        |
| Thailand                   | Falls                                           | 69 (55 to 88)    | 93 (73 to 117)  | 34.3% (28.5% to 40.2%)    |

|             |                                                 |                 |               |                           |
|-------------|-------------------------------------------------|-----------------|---------------|---------------------------|
| Thailand    | Fire, heat, and hot substances                  | 1 (1 to 2)      | 1 (1 to 2)    | -7.9% (-14% to -2.4%)     |
| Thailand    | Foreign body in eyes                            | 0 (0 to 0)      | 0 (0 to 0)    | 0.2% (0.1% to 0.4%)       |
| Thailand    | Foreign body in other body part                 | 1 (1 to 2)      | 1 (1 to 2)    | -7.7% (-14.5% to -0.7%)   |
| Thailand    | Motor vehicle road injuries                     | 34 (25 to 45)   | 25 (19 to 34) | -25% (-32.6% to -16.6%)   |
| Thailand    | Motorcyclist road injuries                      | 80 (65 to 100)  | 62 (50 to 76) | -22.1% (-29.2% to -13.9%) |
| Thailand    | Non-venomous animal contact                     | 4 (2 to 7)      | 3 (2 to 5)    | -26.8% (-32.6% to -19.4%) |
| Thailand    | Other exposure to mechanical forces             | 24 (14 to 39)   | 17 (10 to 28) | -28.5% (-35.2% to -22.9%) |
| Thailand    | Other road injuries                             | 2 (1 to 3)      | 1 (1 to 2)    | -35.7% (-45.7% to -25.4%) |
| Thailand    | Other transport injuries                        | 7 (5 to 9)      | 6 (4 to 7)    | -17% (-23.3% to -11%)     |
| Thailand    | Other unintentional injuries                    | 14 (9 to 23)    | 11 (7 to 18)  | -20.9% (-27.8% to -13.2%) |
| Thailand    | Pedestrian road injuries                        | 24 (18 to 31)   | 11 (8 to 14)  | -55.3% (-59.6% to -50.4%) |
| Thailand    | Physical violence by firearm                    | 1 (1 to 2)      | 1 (0 to 1)    | -32.7% (-41.5% to -22.4%) |
| Thailand    | Physical violence by other means                | 32 (23 to 47)   | 18 (13 to 26) | -43.4% (-47.8% to -38.6%) |
| Thailand    | Physical violence by sharp object               | 5 (3 to 7)      | 2 (1 to 4)    | -53% (-58.6% to -46.6%)   |
| Thailand    | Poisoning by carbon monoxide                    | 0 (0 to 0)      | 0 (0 to 0)    | 25.6% (12.9% to 41.3%)    |
| Thailand    | Poisoning by other means                        | 0 (0 to 0)      | 0 (0 to 0)    | -9% (-16.3% to -1%)       |
| Thailand    | Pulmonary aspiration and foreign body in airway | 0 (0 to 1)      | 0 (0 to 0)    | -28.5% (-37.3% to -17.2%) |
| Thailand    | Self-harm by firearm                            | 0 (0 to 1)      | 0 (0 to 1)    | -32.2% (-48.8% to -13.4%) |
| Thailand    | Self-harm by other specified means              | 3 (2 to 4)      | 2 (1 to 3)    | -23.3% (-28.3% to -17.1%) |
| Thailand    | Unintentional firearm injuries                  | 3 (2 to 4)      | 2 (1 to 3)    | -24.2% (-33% to -15.4%)   |
| Thailand    | Venomous animal contact                         | 1 (0 to 3)      | 1 (0 to 2)    | -37.2% (-45.5% to -29.7%) |
| Timor-Leste | Adverse effects of medical treatment            | 0 (0 to 0)      | 0 (0 to 0)    | 0% (0% to 0%)             |
| Timor-Leste | Conflict and terrorism                          | 160 (64 to 367) | 0 (0 to 0)    | NA                        |
| Timor-Leste | Cyclist road injuries                           | 18 (12 to 25)   | 17 (12 to 24) | -3.9% (-12% to 4.8%)      |
| Timor-Leste | Drowning                                        | 0 (0 to 1)      | 0 (0 to 0)    | -28.6% (-33.6% to -23.7%) |
| Timor-Leste | Environmental heat and cold exposure            | 1 (1 to 2)      | 1 (1 to 2)    | -0.6% (-5.7% to 4.3%)     |
| Timor-Leste | Executions and police conflict                  | 0 (0 to 0)      | 0 (0 to 0)    | NA                        |
| Timor-Leste | Exposure to forces of nature                    | 0 (0 to 0)      | 0 (0 to 0)    | NA                        |
| Timor-Leste | Falls                                           | 42 (33 to 53)   | 63 (50 to 80) | 50.4% (44.9% to 55.8%)    |
| Timor-Leste | Fire, heat, and hot substances                  | 2 (1 to 3)      | 1 (1 to 2)    | -24.1% (-30.2% to -18%)   |
| Timor-Leste | Foreign body in eyes                            | 0 (0 to 0)      | 0 (0 to 0)    | -1% (-1.6% to -0.6%)      |
| Timor-Leste | Foreign body in other body part                 | 1 (1 to 2)      | 1 (0 to 2)    | -10.5% (-14.6% to -4.8%)  |
| Timor-Leste | Motor vehicle road injuries                     | 25 (18 to 32)   | 23 (16 to 30) | -7.7% (-15.7% to 0.9%)    |
| Timor-Leste | Motorcyclist road injuries                      | 21 (16 to 28)   | 34 (26 to 43) | 58.9% (44.2% to 75.7%)    |
| Timor-Leste | Non-venomous animal contact                     | 6 (4 to 10)     | 4 (2 to 7)    | -30.4% (-35.4% to -24.9%) |
| Timor-Leste | Other exposure to mechanical forces             | 21 (12 to 33)   | 17 (10 to 29) | -16.5% (-21.7% to -11.5%) |
| Timor-Leste | Other road injuries                             | 1 (1 to 2)      | 1 (1 to 2)    | 2% (-8.9% to 13.6%)       |
| Timor-Leste | Other transport injuries                        | 4 (3 to 6)      | 4 (3 to 6)    | 0% (-7.3% to 8.3%)        |
| Timor-Leste | Other unintentional injuries                    | 12 (8 to 19)    | 9 (6 to 15)   | -21.9% (-27.1% to -16.5%) |
| Timor-Leste | Pedestrian road injuries                        | 17 (13 to 22)   | 14 (11 to 19) | -16.9% (-23.1% to -9.4%)  |
| Timor-Leste | Physical violence by firearm                    | 0 (0 to 0)      | 0 (0 to 0)    | 24% (8.7% to 40.2%)       |
| Timor-Leste | Physical violence by other means                | 17 (12 to 24)   | 16 (11 to 23) | -3.4% (-9.5% to 3%)       |
| Timor-Leste | Physical violence by sharp object               | 4 (2 to 6)      | 3 (2 to 5)    | -5.9% (-15.5% to 4.2%)    |



|             |                                                 |               |               |                           |
|-------------|-------------------------------------------------|---------------|---------------|---------------------------|
| Timor-Leste | Poisoning by carbon monoxide                    | 0 (0 to 0)    | 0 (0 to 0)    | 29.1% (13.3% to 45.7%)    |
| Timor-Leste | Poisoning by other means                        | 0 (0 to 0)    | 0 (0 to 0)    | -13.7% (-19.9% to -6.2%)  |
| Timor-Leste | Pulmonary aspiration and foreign body in airway | 0 (0 to 0)    | 0 (0 to 0)    | -28.3% (-36.7% to -19.4%) |
| Timor-Leste | Self-harm by firearm                            | 0 (0 to 0)    | 0 (0 to 0)    | 27.9% (6% to 54.2%)       |
| Timor-Leste | Self-harm by other specified means              | 1 (1 to 2)    | 1 (1 to 2)    | -7.1% (-12.7% to -0.6%)   |
| Timor-Leste | Unintentional firearm injuries                  | 2 (1 to 4)    | 2 (1 to 3)    | -13.8% (-21.4% to -4.9%)  |
| Timor-Leste | Venomous animal contact                         | 2 (1 to 4)    | 1 (0 to 2)    | -37.7% (-45.2% to -30.7%) |
| Togo        | Adverse effects of medical treatment            | 0 (0 to 0)    | 0 (0 to 0)    | 0% (0% to 0%)             |
| Togo        | Conflict and terrorism                          | 0 (0 to 0)    | 0 (0 to 0)    | NA                        |
| Togo        | Cyclist road injuries                           | 30 (19 to 45) | 34 (22 to 50) | 13% (5% to 22.3%)         |
| Togo        | Drowning                                        | 0 (0 to 0)    | 0 (0 to 0)    | -10.7% (-16.6% to -4%)    |
| Togo        | Environmental heat and cold exposure            | 0 (0 to 1)    | 0 (0 to 1)    | 4.1% (-1.5% to 9.9%)      |
| Togo        | Executions and police conflict                  | 0 (0 to 0)    | 0 (0 to 0)    | NA                        |
| Togo        | Exposure to forces of nature                    | 0 (0 to 0)    | 0 (0 to 0)    | NA                        |
| Togo        | Falls                                           | 19 (13 to 29) | 21 (14 to 31) | 7.7% (3.7% to 12%)        |
| Togo        | Fire, heat, and hot substances                  | 0 (0 to 0)    | 0 (0 to 0)    | -6.4% (-12.5% to -1%)     |
| Togo        | Foreign body in eyes                            | 0 (0 to 0)    | 0 (0 to 0)    | -0.7% (-2% to 0%)         |
| Togo        | Foreign body in other body part                 | 4 (1 to 8)    | 4 (2 to 8)    | 1.9% (-3.7% to 7.6%)      |
| Togo        | Motor vehicle road injuries                     | 54 (36 to 76) | 55 (38 to 79) | 3.2% (-4.2% to 11.4%)     |
| Togo        | Motorcyclist road injuries                      | 27 (19 to 37) | 32 (23 to 44) | 19.7% (10.5% to 29%)      |
| Togo        | Non-venomous animal contact                     | 3 (1 to 6)    | 3 (1 to 6)    | 3.3% (-1.6% to 8.8%)      |
| Togo        | Other exposure to mechanical forces             | 25 (12 to 45) | 23 (11 to 42) | -7.8% (-13.9% to -0.6%)   |
| Togo        | Other road injuries                             | 2 (1 to 5)    | 2 (1 to 5)    | 3.4% (-5.6% to 13.3%)     |
| Togo        | Other transport injuries                        | 4 (3 to 5)    | 3 (2 to 5)    | -8.7% (-15.5% to -1.9%)   |
| Togo        | Other unintentional injuries                    | 3 (2 to 5)    | 3 (1 to 4)    | -6.3% (-12.6% to 1.5%)    |
| Togo        | Pedestrian road injuries                        | 57 (41 to 76) | 52 (37 to 71) | -8.2% (-14.2% to -2.1%)   |
| Togo        | Physical violence by firearm                    | 0 (0 to 0)    | 0 (0 to 0)    | 34.9% (22.3% to 48.6%)    |
| Togo        | Physical violence by other means                | 7 (5 to 11)   | 8 (5 to 12)   | 11.9% (5.8% to 18.6%)     |
| Togo        | Physical violence by sharp object               | 2 (1 to 3)    | 2 (1 to 4)    | 10.5% (2.2% to 19.9%)     |
| Togo        | Poisoning by carbon monoxide                    | 0 (0 to 0)    | 0 (0 to 0)    | 8.4% (-3.4% to 22.2%)     |
| Togo        | Poisoning by other means                        | 0 (0 to 0)    | 0 (0 to 0)    | -12.9% (-20.4% to -4.8%)  |
| Togo        | Pulmonary aspiration and foreign body in airway | 0 (0 to 0)    | 0 (0 to 0)    | -6.1% (-14.8% to 3.7%)    |
| Togo        | Self-harm by firearm                            | 0 (0 to 0)    | 0 (0 to 0)    | 24% (15.4% to 34.3%)      |
| Togo        | Self-harm by other specified means              | 0 (0 to 0)    | 0 (0 to 0)    | 13.5% (7% to 20.6%)       |
| Togo        | Unintentional firearm injuries                  | 1 (0 to 2)    | 1 (0 to 2)    | -10.5% (-18.7% to -1.6%)  |
| Togo        | Venomous animal contact                         | 0 (0 to 1)    | 0 (0 to 1)    | 1.8% (-5.7% to 9.1%)      |
| Tokelau     | Adverse effects of medical treatment            | 0 (0 to 0)    | 0 (0 to 0)    | 0% (0% to 0%)             |
| Tokelau     | Conflict and terrorism                          | 0 (0 to 0)    | 0 (0 to 0)    | NA                        |
| Tokelau     | Cyclist road injuries                           | 8 (4 to 12)   | 8 (5 to 13)   | 11.1% (3.3% to 19.5%)     |
| Tokelau     | Drowning                                        | 0 (0 to 0)    | 0 (0 to 0)    | 18.8% (7% to 34%)         |
| Tokelau     | Environmental heat and cold exposure            | 0 (0 to 0)    | 0 (0 to 0)    | -1.7% (-7.5% to 4.8%)     |
| Tokelau     | Executions and police conflict                  | 0 (0 to 0)    | 0 (0 to 0)    | NA                        |
| Tokelau     | Exposure to forces of nature                    | 0 (0 to 0)    | 0 (0 to 0)    | NA                        |

|         |                                                 |               |               |                           |
|---------|-------------------------------------------------|---------------|---------------|---------------------------|
| Tokelau | Falls                                           | 21 (13 to 34) | 34 (21 to 52) | 56.3% (50.4% to 62.9%)    |
| Tokelau | Fire, heat, and hot substances                  | 0 (0 to 0)    | 0 (0 to 0)    | 17.2% (9.7% to 24.6%)     |
| Tokelau | Foreign body in eyes                            | 0 (0 to 0)    | 0 (0 to 0)    | 2.4% (0.8% to 4.6%)       |
| Tokelau | Foreign body in other body part                 | 1 (0 to 2)    | 1 (0 to 2)    | -0.1% (-5% to 5.3%)       |
| Tokelau | Motor vehicle road injuries                     | 28 (20 to 40) | 26 (18 to 37) | -8.3% (-14.8% to -1.5%)   |
| Tokelau | Motorcyclist road injuries                      | 18 (13 to 26) | 20 (14 to 28) | 7.7% (0.1% to 15.4%)      |
| Tokelau | Non-venomous animal contact                     | 3 (1 to 6)    | 2 (1 to 5)    | -18.9% (-23.8% to -14.3%) |
| Tokelau | Other exposure to mechanical forces             | 20 (10 to 38) | 18 (9 to 34)  | -11.4% (-16.6% to -5.7%)  |
| Tokelau | Other road injuries                             | 2 (1 to 4)    | 2 (1 to 4)    | 12.6% (1.6% to 23.8%)     |
| Tokelau | Other transport injuries                        | 3 (2 to 5)    | 3 (2 to 4)    | -9.1% (-15.4% to -2.2%)   |
| Tokelau | Other unintentional injuries                    | 2 (1 to 4)    | 2 (1 to 4)    | -7.6% (-12.5% to -2.4%)   |
| Tokelau | Pedestrian road injuries                        | 18 (12 to 25) | 16 (11 to 23) | -9.1% (-15.6% to -2.3%)   |
| Tokelau | Physical violence by firearm                    | 0 (0 to 0)    | 0 (0 to 0)    | 61.5% (40.3% to 83.8%)    |
| Tokelau | Physical violence by other means                | 30 (20 to 45) | 30 (20 to 46) | 0.3% (-4.8% to 5.4%)      |
| Tokelau | Physical violence by sharp object               | 2 (1 to 5)    | 2 (1 to 4)    | -12% (-20.4% to -2.7%)    |
| Tokelau | Poisoning by carbon monoxide                    | 0 (0 to 0)    | 0 (0 to 0)    | 16.3% (4.3% to 30.4%)     |
| Tokelau | Poisoning by other means                        | 0 (0 to 0)    | 0 (0 to 0)    | -9.4% (-17.2% to -1%)     |
| Tokelau | Pulmonary aspiration and foreign body in airway | 0 (0 to 0)    | 0 (0 to 0)    | -12.9% (-22.3% to -3.4%)  |
| Tokelau | Self-harm by firearm                            | 0 (0 to 0)    | 0 (0 to 0)    | 4.5% (-3.2% to 14.8%)     |
| Tokelau | Self-harm by other specified means              | 0 (0 to 0)    | 0 (0 to 0)    | -10.1% (-15.9% to -2.9%)  |
| Tokelau | Unintentional firearm injuries                  | 1 (0 to 2)    | 1 (0 to 2)    | -16.9% (-25.9% to -8.3%)  |
| Tokelau | Venomous animal contact                         | 1 (0 to 2)    | 1 (0 to 2)    | -16.6% (-22.2% to -9.7%)  |
| Tonga   | Adverse effects of medical treatment            | 0 (0 to 0)    | 0 (0 to 0)    | 0% (0% to 0%)             |
| Tonga   | Conflict and terrorism                          | 0 (0 to 0)    | 0 (0 to 0)    | NA                        |
| Tonga   | Cyclist road injuries                           | 9 (6 to 13)   | 11 (7 to 15)  | 12.1% (4.1% to 20.4%)     |
| Tonga   | Drowning                                        | 0 (0 to 1)    | 0 (0 to 1)    | 22.1% (11.4% to 35.2%)    |
| Tonga   | Environmental heat and cold exposure            | 2 (1 to 3)    | 2 (1 to 3)    | -1.2% (-6.1% to 5.2%)     |
| Tonga   | Executions and police conflict                  | 0 (0 to 0)    | 0 (0 to 0)    | NA                        |
| Tonga   | Exposure to forces of nature                    | 6 (3 to 10)   | 0 (0 to 0)    | NA                        |
| Tonga   | Falls                                           | 44 (34 to 58) | 61 (47 to 82) | 39.3% (34.4% to 45%)      |
| Tonga   | Fire, heat, and hot substances                  | 2 (1 to 3)    | 2 (1 to 3)    | -3.3% (-9.3% to 2.7%)     |
| Tonga   | Foreign body in eyes                            | 0 (0 to 0)    | 0 (0 to 0)    | -0.3% (-0.9% to 0.1%)     |
| Tonga   | Foreign body in other body part                 | 1 (0 to 1)    | 1 (0 to 1)    | -3.1% (-7.5% to 2.1%)     |
| Tonga   | Motor vehicle road injuries                     | 21 (16 to 27) | 22 (17 to 28) | 2.7% (-4.8% to 10.8%)     |
| Tonga   | Motorcyclist road injuries                      | 12 (9 to 16)  | 14 (11 to 18) | 15.2% (6.4% to 24.6%)     |
| Tonga   | Non-venomous animal contact                     | 5 (3 to 9)    | 4 (2 to 7)    | -14.1% (-18.4% to -9%)    |
| Tonga   | Other exposure to mechanical forces             | 11 (6 to 18)  | 10 (5 to 17)  | -6.4% (-11.1% to -0.6%)   |
| Tonga   | Other road injuries                             | 1 (1 to 2)    | 1 (1 to 2)    | 11.9% (1.4% to 22.9%)     |
| Tonga   | Other transport injuries                        | 7 (5 to 9)    | 6 (4 to 8)    | -11.5% (-16.7% to -5.9%)  |
| Tonga   | Other unintentional injuries                    | 10 (6 to 15)  | 8 (6 to 13)   | -13.3% (-17.5% to -8.9%)  |
| Tonga   | Pedestrian road injuries                        | 12 (9 to 15)  | 11 (8 to 14)  | -9.7% (-16.6% to -2.2%)   |
| Tonga   | Physical violence by firearm                    | 0 (0 to 0)    | 0 (0 to 0)    | -17.3% (-34.4% to 1.3%)   |
| Tonga   | Physical violence by other means                | 38 (27 to 53) | 19 (13 to 27) | -50.7% (-55% to -46.1%)   |

|                     |                                                 |               |               |                           |
|---------------------|-------------------------------------------------|---------------|---------------|---------------------------|
| Tonga               | Physical violence by sharp object               | 3 (2 to 6)    | 2 (1 to 3)    | -52.5% (-60.5% to -43.8%) |
| Tonga               | Poisoning by carbon monoxide                    | 0 (0 to 0)    | 0 (0 to 0)    | 10.4% (1.2% to 22.6%)     |
| Tonga               | Poisoning by other means                        | 0 (0 to 0)    | 0 (0 to 0)    | -15% (-21.1% to -9.3%)    |
| Tonga               | Pulmonary aspiration and foreign body in airway | 0 (0 to 0)    | 0 (0 to 0)    | -1.4% (-10.7% to 9.3%)    |
| Tonga               | Self-harm by firearm                            | 0 (0 to 0)    | 0 (0 to 1)    | 29.3% (13.6% to 46.3%)    |
| Tonga               | Self-harm by other specified means              | 1 (1 to 1)    | 1 (1 to 2)    | 18.5% (10.6% to 27.2%)    |
| Tonga               | Unintentional firearm injuries                  | 2 (1 to 3)    | 2 (1 to 3)    | -3.3% (-10.5% to 3.8%)    |
| Tonga               | Venomous animal contact                         | 3 (1 to 6)    | 3 (1 to 6)    | -11.8% (-16.6% to -6%)    |
| Trinidad and Tobago | Adverse effects of medical treatment            | 0 (0 to 0)    | 0 (0 to 0)    | 0% (0% to 0%)             |
| Trinidad and Tobago | Conflict and terrorism                          | 16 (7 to 36)  | 0 (0 to 0)    | NA                        |
| Trinidad and Tobago | Cyclist road injuries                           | 29 (21 to 39) | 27 (19 to 37) | -8% (-18.9% to 4.6%)      |
| Trinidad and Tobago | Drowning                                        | 0 (0 to 1)    | 0 (0 to 1)    | 0% (-12.2% to 13.2%)      |
| Trinidad and Tobago | Environmental heat and cold exposure            | 12 (8 to 17)  | 12 (9 to 18)  | 6.3% (1.6% to 11.2%)      |
| Trinidad and Tobago | Executions and police conflict                  | 0 (0 to 0)    | 0 (0 to 0)    | NA                        |
| Trinidad and Tobago | Exposure to forces of nature                    | 0 (0 to 0)    | 0 (0 to 0)    | NA                        |
| Trinidad and Tobago | Falls                                           | 56 (44 to 72) | 60 (47 to 79) | 7.2% (1.5% to 12.9%)      |
| Trinidad and Tobago | Fire, heat, and hot substances                  | 4 (2 to 6)    | 3 (2 to 6)    | -5.9% (-13% to 0.8%)      |
| Trinidad and Tobago | Foreign body in eyes                            | 0 (0 to 0)    | 0 (0 to 0)    | 0.4% (0.2% to 0.7%)       |
| Trinidad and Tobago | Foreign body in other body part                 | 1 (1 to 2)    | 1 (1 to 2)    | 1% (-4.9% to 7%)          |
| Trinidad and Tobago | Motor vehicle road injuries                     | 30 (22 to 39) | 35 (26 to 45) | 16.7% (2.9% to 32.9%)     |
| Trinidad and Tobago | Motorcyclist road injuries                      | 11 (8 to 15)  | 16 (12 to 22) | 46.2% (27% to 70.4%)      |
| Trinidad and Tobago | Non-venomous animal contact                     | 3 (1 to 5)    | 2 (1 to 4)    | -17.8% (-22.3% to -12.2%) |
| Trinidad and Tobago | Other exposure to mechanical forces             | 29 (17 to 48) | 33 (18 to 54) | 12.4% (5.1% to 19.6%)     |
| Trinidad and Tobago | Other road injuries                             | 4 (2 to 7)    | 4 (2 to 7)    | -4.6% (-17.2% to 9.4%)    |
| Trinidad and Tobago | Other transport injuries                        | 4 (3 to 5)    | 4 (3 to 5)    | -1.3% (-7.5% to 4.9%)     |
| Trinidad and Tobago | Other unintentional injuries                    | 12 (8 to 20)  | 12 (7 to 20)  | -3.1% (-9.6% to 3.1%)     |
| Trinidad and Tobago | Pedestrian road injuries                        | 21 (16 to 27) | 13 (10 to 18) | -35.6% (-43.8% to -26.6%) |
| Trinidad and Tobago | Physical violence by firearm                    | 1 (1 to 1)    | 5 (3 to 6)    | 398.6% (304.4% to 524.9%) |
| Trinidad and Tobago | Physical violence by other means                | 11 (8 to 17)  | 19 (13 to 29) | 68.1% (49.2% to 88.7%)    |
| Trinidad and Tobago | Physical violence by sharp object               | 4 (3 to 6)    | 7 (4 to 11)   | 77.4% (52% to 107.8%)     |
| Trinidad and Tobago | Poisoning by carbon monoxide                    | 0 (0 to 0)    | 0 (0 to 0)    | 12.4% (-1.6% to 27.3%)    |
| Trinidad and Tobago | Poisoning by other means                        | 0 (0 to 0)    | 0 (0 to 0)    | 2% (-6.2% to 11.4%)       |
| Trinidad and Tobago | Pulmonary aspiration and foreign body in airway | 1 (0 to 1)    | 0 (0 to 1)    | -19% (-27.2% to -9.3%)    |
| Trinidad and Tobago | Self-harm by firearm                            | 0 (0 to 1)    | 0 (0 to 1)    | -4.8% (-18.5% to 12.6%)   |
| Trinidad and Tobago | Self-harm by other specified means              | 1 (1 to 2)    | 1 (1 to 1)    | -30.6% (-37.3% to -23.2%) |
| Trinidad and Tobago | Unintentional firearm injuries                  | 4 (2 to 6)    | 4 (2 to 7)    | 18.3% (8.7% to 29.5%)     |
| Trinidad and Tobago | Venomous animal contact                         | 5 (2 to 8)    | 4 (2 to 7)    | -15.7% (-20% to -10.4%)   |
| Tunisia             | Adverse effects of medical treatment            | 0 (0 to 0)    | 0 (0 to 0)    | 0% (0% to 0%)             |
| Tunisia             | Conflict and terrorism                          | 0 (0 to 0)    | 1 (0 to 2)    | NA                        |
| Tunisia             | Cyclist road injuries                           | 21 (14 to 30) | 20 (14 to 28) | -3.7% (-11.8% to 5.5%)    |
| Tunisia             | Drowning                                        | 0 (0 to 0)    | 0 (0 to 0)    | 60.5% (35.7% to 86.9%)    |
| Tunisia             | Environmental heat and cold exposure            | 3 (2 to 4)    | 3 (2 to 4)    | 3% (-1.5% to 8.3%)        |
| Tunisia             | Executions and police conflict                  | 0 (0 to 0)    | 0 (0 to 0)    | NA                        |

|         |                                                 |               |                 |                           |
|---------|-------------------------------------------------|---------------|-----------------|---------------------------|
| Tunisia | Exposure to forces of nature                    | 2 (1 to 3)    | 0 (0 to 0)      | NA                        |
| Tunisia | Falls                                           | 66 (51 to 86) | 92 (71 to 121)  | 40.1% (34.5% to 46%)      |
| Tunisia | Fire, heat, and hot substances                  | 1 (0 to 1)    | 1 (0 to 1)      | -15.4% (-23.5% to -7.4%)  |
| Tunisia | Foreign body in eyes                            | 0 (0 to 0)    | 0 (0 to 0)      | -0.7% (-1.4% to -0.3%)    |
| Tunisia | Foreign body in other body part                 | 1 (1 to 3)    | 1 (1 to 3)      | -1.1% (-5.3% to 3.8%)     |
| Tunisia | Motor vehicle road injuries                     | 41 (31 to 52) | 39 (31 to 51)   | -2.9% (-10.9% to 5.7%)    |
| Tunisia | Motorcyclist road injuries                      | 15 (11 to 19) | 14 (11 to 18)   | -6.1% (-14.8% to 2.7%)    |
| Tunisia | Non-venomous animal contact                     | 3 (2 to 6)    | 3 (2 to 6)      | -7.6% (-12.4% to -2%)     |
| Tunisia | Other exposure to mechanical forces             | 44 (28 to 69) | 36 (23 to 56)   | -17.6% (-22.7% to -12.1%) |
| Tunisia | Other road injuries                             | 2 (1 to 4)    | 2 (1 to 4)      | 4.5% (-6% to 16%)         |
| Tunisia | Other transport injuries                        | 5 (3 to 6)    | 5 (3 to 6)      | -0.5% (-7.3% to 5.6%)     |
| Tunisia | Other unintentional injuries                    | 16 (10 to 26) | 15 (10 to 25)   | -4.5% (-10% to 2.1%)      |
| Tunisia | Pedestrian road injuries                        | 30 (23 to 37) | 24 (18 to 30)   | -19.6% (-26.8% to -12.8%) |
| Tunisia | Physical violence by firearm                    | 0 (0 to 0)    | 1 (0 to 1)      | 141.5% (115.7% to 172.5%) |
| Tunisia | Physical violence by other means                | 9 (6 to 13)   | 10 (7 to 14)    | 2.8% (-3.4% to 8.9%)      |
| Tunisia | Physical violence by sharp object               | 1 (1 to 2)    | 1 (1 to 2)      | 1.8% (-6.8% to 10.5%)     |
| Tunisia | Poisoning by carbon monoxide                    | 0 (0 to 0)    | 0 (0 to 0)      | 30.1% (14.9% to 45.7%)    |
| Tunisia | Poisoning by other means                        | 0 (0 to 0)    | 0 (0 to 0)      | -15.3% (-23.7% to -6.7%)  |
| Tunisia | Pulmonary aspiration and foreign body in airway | 0 (0 to 1)    | 0 (0 to 1)      | -13.4% (-21.3% to -4.8%)  |
| Tunisia | Self-harm by firearm                            | 0 (0 to 0)    | 0 (0 to 0)      | 34.3% (21% to 47.5%)      |
| Tunisia | Self-harm by other specified means              | 1 (1 to 1)    | 1 (1 to 2)      | 14.7% (8.6% to 21.3%)     |
| Tunisia | Unintentional firearm injuries                  | 2 (1 to 2)    | 2 (1 to 2)      | -3.9% (-15.3% to 7.7%)    |
| Tunisia | Venomous animal contact                         | 2 (1 to 4)    | 2 (1 to 4)      | -5.8% (-11.5% to 0.2%)    |
| Turkey  | Adverse effects of medical treatment            | 0 (0 to 0)    | 0 (0 to 0)      | 0% (0% to 0%)             |
| Turkey  | Conflict and terrorism                          | 8 (3 to 19)   | 2 (1 to 5)      | NA                        |
| Turkey  | Cyclist road injuries                           | 16 (11 to 22) | 14 (10 to 20)   | -9.5% (-17.7% to -1%)     |
| Turkey  | Drowning                                        | 0 (0 to 0)    | 0 (0 to 1)      | 135.5% (104% to 171.8%)   |
| Turkey  | Environmental heat and cold exposure            | 3 (2 to 4)    | 3 (2 to 4)      | 3.6% (-2.5% to 10.1%)     |
| Turkey  | Executions and police conflict                  | 0 (0 to 0)    | 0 (0 to 0)      | NA                        |
| Turkey  | Exposure to forces of nature                    | 0 (0 to 1)    | 0 (0 to 0)      | NA                        |
| Turkey  | Falls                                           | 60 (46 to 79) | 120 (95 to 155) | 100.3% (88.8% to 114.5%)  |
| Turkey  | Fire, heat, and hot substances                  | 1 (0 to 1)    | 1 (0 to 1)      | -1.1% (-6.2% to 4.2%)     |
| Turkey  | Foreign body in eyes                            | 0 (0 to 0)    | 0 (0 to 0)      | 0.1% (0% to 0.2%)         |
| Turkey  | Foreign body in other body part                 | 1 (1 to 3)    | 1 (1 to 3)      | -8.2% (-14.7% to -2.8%)   |
| Turkey  | Motor vehicle road injuries                     | 31 (24 to 40) | 26 (20 to 33)   | -17% (-24.2% to -8.6%)    |
| Turkey  | Motorcyclist road injuries                      | 10 (7 to 13)  | 11 (8 to 14)    | 9.2% (-1.2% to 20.8%)     |
| Turkey  | Non-venomous animal contact                     | 4 (2 to 7)    | 3 (2 to 5)      | -17.4% (-22.5% to -12.3%) |
| Turkey  | Other exposure to mechanical forces             | 27 (16 to 44) | 26 (15 to 42)   | -5.5% (-11.3% to 0.4%)    |
| Turkey  | Other road injuries                             | 5 (3 to 7)    | 2 (1 to 3)      | -62.7% (-69.5% to -55.9%) |
| Turkey  | Other transport injuries                        | 6 (4 to 8)    | 5 (4 to 7)      | -12.9% (-18.1% to -7.7%)  |
| Turkey  | Other unintentional injuries                    | 22 (14 to 35) | 17 (10 to 28)   | -22.2% (-29.3% to -15.3%) |
| Turkey  | Pedestrian road injuries                        | 15 (11 to 19) | 13 (10 to 16)   | -10.5% (-18.2% to -1.8%)  |
| Turkey  | Physical violence by firearm                    | 0 (0 to 1)    | 1 (0 to 1)      | 78.4% (50.6% to 107.1%)   |

|              |                                                 |                 |                 |                           |
|--------------|-------------------------------------------------|-----------------|-----------------|---------------------------|
| Turkey       | Physical violence by other means                | 18 (13 to 25)   | 13 (9 to 18)    | -28.9% (-35.4% to -22.7%) |
| Turkey       | Physical violence by sharp object               | 3 (2 to 4)      | 2 (1 to 3)      | -22.3% (-31.7% to -12.8%) |
| Turkey       | Poisoning by carbon monoxide                    | 0 (0 to 0)      | 0 (0 to 0)      | 39.1% (23% to 59%)        |
| Turkey       | Poisoning by other means                        | 0 (0 to 0)      | 0 (0 to 0)      | -17% (-24.1% to -10%)     |
| Turkey       | Pulmonary aspiration and foreign body in airway | 0 (0 to 1)      | 0 (0 to 1)      | -19.1% (-25.5% to -12.6%) |
| Turkey       | Self-harm by firearm                            | 0 (0 to 1)      | 0 (0 to 0)      | -20.5% (-28.4% to -11.7%) |
| Turkey       | Self-harm by other specified means              | 1 (1 to 1)      | 1 (0 to 1)      | -5.4% (-12.1% to 2.2%)    |
| Turkey       | Unintentional firearm injuries                  | 3 (2 to 4)      | 2 (1 to 4)      | -14.6% (-23.3% to -4.4%)  |
| Turkey       | Venomous animal contact                         | 2 (1 to 4)      | 2 (1 to 4)      | -8.7% (-14.9% to 0.1%)    |
| Turkmenistan | Adverse effects of medical treatment            | 0 (0 to 0)      | 0 (0 to 0)      | 0% (0% to 0%)             |
| Turkmenistan | Conflict and terrorism                          | 0 (0 to 0)      | 0 (0 to 0)      | NA                        |
| Turkmenistan | Cyclist road injuries                           | 20 (14 to 28)   | 17 (11 to 23)   | -17.5% (-26.2% to -7.5%)  |
| Turkmenistan | Drowning                                        | 1 (0 to 1)      | 1 (0 to 1)      | 2.6% (-9.1% to 14.8%)     |
| Turkmenistan | Environmental heat and cold exposure            | 5 (3 to 7)      | 7 (5 to 9)      | 37.8% (17.9% to 57.7%)    |
| Turkmenistan | Executions and police conflict                  | 0 (0 to 0)      | 0 (0 to 0)      | NA                        |
| Turkmenistan | Exposure to forces of nature                    | 0 (0 to 0)      | 0 (0 to 0)      | NA                        |
| Turkmenistan | Falls                                           | 102 (78 to 135) | 108 (81 to 147) | 6.1% (0.3% to 11.6%)      |
| Turkmenistan | Fire, heat, and hot substances                  | 6 (4 to 11)     | 4 (2 to 7)      | -37.2% (-44.2% to -31%)   |
| Turkmenistan | Foreign body in eyes                            | 0 (0 to 0)      | 0 (0 to 0)      | 2.6% (1.6% to 3.9%)       |
| Turkmenistan | Foreign body in other body part                 | 2 (1 to 4)      | 2 (1 to 4)      | -8% (-14.8% to -1.2%)     |
| Turkmenistan | Motor vehicle road injuries                     | 53 (42 to 68)   | 37 (28 to 47)   | -30.8% (-39.2% to -21.8%) |
| Turkmenistan | Motorcyclist road injuries                      | 6 (5 to 8)      | 5 (4 to 8)      | -13.5% (-27% to 1.3%)     |
| Turkmenistan | Non-venomous animal contact                     | 2 (1 to 4)      | 2 (1 to 4)      | -11.4% (-16.7% to -5.5%)  |
| Turkmenistan | Other exposure to mechanical forces             | 49 (30 to 78)   | 65 (40 to 103)  | 31.4% (22.4% to 42.8%)    |
| Turkmenistan | Other road injuries                             | 2 (1 to 3)      | 2 (1 to 3)      | -17.9% (-28.7% to -4.8%)  |
| Turkmenistan | Other transport injuries                        | 4 (3 to 6)      | 5 (3 to 6)      | 5.1% (-1.4% to 11.7%)     |
| Turkmenistan | Other unintentional injuries                    | 21 (13 to 33)   | 22 (14 to 35)   | 3.7% (-2.2% to 10.1%)     |
| Turkmenistan | Pedestrian road injuries                        | 30 (23 to 37)   | 15 (11 to 19)   | -50.3% (-56.7% to -43.1%) |
| Turkmenistan | Physical violence by firearm                    | 0 (0 to 0)      | 0 (0 to 0)      | 17.1% (-4.8% to 38.8%)    |
| Turkmenistan | Physical violence by other means                | 19 (13 to 26)   | 16 (11 to 23)   | -12.4% (-22.9% to -1.3%)  |
| Turkmenistan | Physical violence by sharp object               | 3 (2 to 5)      | 3 (2 to 4)      | -15.3% (-27.3% to -2%)    |
| Turkmenistan | Poisoning by carbon monoxide                    | 0 (0 to 0)      | 0 (0 to 0)      | 38.7% (24.8% to 58.5%)    |
| Turkmenistan | Poisoning by other means                        | 0 (0 to 1)      | 0 (0 to 1)      | 0.1% (-8.7% to 10%)       |
| Turkmenistan | Pulmonary aspiration and foreign body in airway | 1 (1 to 2)      | 1 (1 to 2)      | -13.2% (-20.2% to -5.5%)  |
| Turkmenistan | Self-harm by firearm                            | 0 (0 to 0)      | 0 (0 to 0)      | 16.7% (0.9% to 37.3%)     |
| Turkmenistan | Self-harm by other specified means              | 2 (1 to 3)      | 2 (2 to 4)      | 29.2% (21.3% to 37.7%)    |
| Turkmenistan | Unintentional firearm injuries                  | 1 (1 to 2)      | 1 (1 to 2)      | 19.8% (7.3% to 34%)       |
| Turkmenistan | Venomous animal contact                         | 2 (1 to 5)      | 2 (1 to 4)      | -11.8% (-16.5% to -6.2%)  |
| Tuvalu       | Adverse effects of medical treatment            | 0 (0 to 0)      | 0 (0 to 0)      | 0% (0% to 0%)             |
| Tuvalu       | Conflict and terrorism                          | 0 (0 to 0)      | 0 (0 to 0)      | NA                        |
| Tuvalu       | Cyclist road injuries                           | 8 (5 to 12)     | 8 (5 to 13)     | 5.3% (-3.6% to 14.9%)     |
| Tuvalu       | Drowning                                        | 0 (0 to 0)      | 0 (0 to 0)      | 11.4% (4.1% to 20.3%)     |
| Tuvalu       | Environmental heat and cold exposure            | 0 (0 to 1)      | 0 (0 to 1)      | -0.9% (-7.7% to 7.1%)     |

|        |                                                 |               |               |                           |
|--------|-------------------------------------------------|---------------|---------------|---------------------------|
| Tuvalu | Executions and police conflict                  | 0 (0 to 0)    | 0 (0 to 0)    | NA                        |
| Tuvalu | Exposure to forces of nature                    | 0 (0 to 0)    | 0 (0 to 0)    | NA                        |
| Tuvalu | Falls                                           | 21 (13 to 34) | 32 (20 to 51) | 50.2% (44.6% to 56.5%)    |
| Tuvalu | Fire, heat, and hot substances                  | 0 (0 to 0)    | 0 (0 to 0)    | 9.4% (1.8% to 18.5%)      |
| Tuvalu | Foreign body in eyes                            | 0 (0 to 0)    | 0 (0 to 0)    | 4.4% (1.9% to 8.1%)       |
| Tuvalu | Foreign body in other body part                 | 1 (0 to 2)    | 1 (0 to 1)    | -0.3% (-4.7% to 5.2%)     |
| Tuvalu | Motor vehicle road injuries                     | 30 (20 to 41) | 27 (18 to 38) | -9.2% (-16.4% to -0.9%)   |
| Tuvalu | Motorcyclist road injuries                      | 20 (15 to 27) | 22 (16 to 30) | 8.3% (-0.7% to 18%)       |
| Tuvalu | Non-venomous animal contact                     | 3 (1 to 6)    | 2 (1 to 5)    | -15% (-19.4% to -10.6%)   |
| Tuvalu | Other exposure to mechanical forces             | 18 (9 to 33)  | 16 (8 to 30)  | -9.6% (-15% to -2.9%)     |
| Tuvalu | Other road injuries                             | 2 (1 to 3)    | 2 (1 to 4)    | 12.3% (1.4% to 25.2%)     |
| Tuvalu | Other transport injuries                        | 3 (2 to 5)    | 3 (2 to 4)    | -9.4% (-15.1% to -3.4%)   |
| Tuvalu | Other unintentional injuries                    | 2 (1 to 3)    | 2 (1 to 3)    | -5.1% (-10.8% to 1.2%)    |
| Tuvalu | Pedestrian road injuries                        | 20 (14 to 28) | 18 (13 to 25) | -8.8% (-16% to -0.9%)     |
| Tuvalu | Physical violence by firearm                    | 0 (0 to 0)    | 0 (0 to 0)    | 23.2% (7.6% to 41.9%)     |
| Tuvalu | Physical violence by other means                | 29 (19 to 44) | 32 (21 to 48) | 11.3% (3.5% to 19.6%)     |
| Tuvalu | Physical violence by sharp object               | 2 (1 to 4)    | 2 (1 to 4)    | -5.8% (-15.3% to 3.8%)    |
| Tuvalu | Poisoning by carbon monoxide                    | 0 (0 to 0)    | 0 (0 to 0)    | 14.3% (1% to 29.5%)       |
| Tuvalu | Poisoning by other means                        | 0 (0 to 0)    | 0 (0 to 0)    | -11.2% (-19.6% to -2.2%)  |
| Tuvalu | Pulmonary aspiration and foreign body in airway | 0 (0 to 0)    | 0 (0 to 0)    | -19.7% (-29.8% to -8.4%)  |
| Tuvalu | Self-harm by firearm                            | 0 (0 to 0)    | 0 (0 to 0)    | 12.5% (2.6% to 23.5%)     |
| Tuvalu | Self-harm by other specified means              | 0 (0 to 1)    | 0 (0 to 0)    | -17.1% (-23.3% to -9.8%)  |
| Tuvalu | Unintentional firearm injuries                  | 1 (0 to 3)    | 1 (0 to 2)    | -20.9% (-30.5% to -11.2%) |
| Tuvalu | Venomous animal contact                         | 1 (0 to 2)    | 1 (0 to 2)    | -6.5% (-13.3% to 3.9%)    |
| Uganda | Adverse effects of medical treatment            | 0 (0 to 0)    | 0 (0 to 0)    | 0% (0% to 0%)             |
| Uganda | Conflict and terrorism                          | 23 (7 to 58)  | 1 (0 to 2)    | NA                        |
| Uganda | Cyclist road injuries                           | 41 (28 to 57) | 44 (30 to 62) | 7.3% (-0.3% to 15.7%)     |
| Uganda | Drowning                                        | 0 (0 to 0)    | 0 (0 to 0)    | -1% (-8.3% to 8.8%)       |
| Uganda | Environmental heat and cold exposure            | 0 (0 to 1)    | 0 (0 to 1)    | 2.3% (-3.3% to 7.6%)      |
| Uganda | Executions and police conflict                  | 0 (0 to 0)    | 0 (0 to 0)    | NA                        |
| Uganda | Exposure to forces of nature                    | 0 (0 to 0)    | 0 (0 to 0)    | NA                        |
| Uganda | Falls                                           | 23 (14 to 36) | 27 (17 to 42) | 17.2% (13.6% to 21%)      |
| Uganda | Fire, heat, and hot substances                  | 0 (0 to 1)    | 0 (0 to 1)    | -5.6% (-10% to -1.3%)     |
| Uganda | Foreign body in eyes                            | 0 (0 to 0)    | 0 (0 to 0)    | -1.1% (-2.5% to -0.2%)    |
| Uganda | Foreign body in other body part                 | 3 (1 to 7)    | 3 (1 to 7)    | -6.9% (-11.8% to -1.7%)   |
| Uganda | Motor vehicle road injuries                     | 36 (24 to 50) | 39 (26 to 53) | 7.6% (-1.3% to 17.2%)     |
| Uganda | Motorcyclist road injuries                      | 19 (13 to 26) | 20 (14 to 28) | 9.7% (1.5% to 18%)        |
| Uganda | Non-venomous animal contact                     | 5 (2 to 11)   | 5 (2 to 9)    | -14.8% (-18.9% to -10.6%) |
| Uganda | Other exposure to mechanical forces             | 25 (12 to 46) | 24 (12 to 44) | -4.5% (-10.2% to 2.2%)    |
| Uganda | Other road injuries                             | 2 (1 to 3)    | 1 (1 to 3)    | -14% (-21.1% to -5.9%)    |
| Uganda | Other transport injuries                        | 3 (2 to 5)    | 3 (2 to 4)    | -5.1% (-10% to -0.3%)     |
| Uganda | Other unintentional injuries                    | 2 (1 to 4)    | 2 (1 to 4)    | -1.1% (-8.5% to 5.7%)     |
| Uganda | Pedestrian road injuries                        | 53 (39 to 70) | 50 (37 to 66) | -5.3% (-11.8% to 0.9%)    |



|                      |                                                 |                  |                  |                           |
|----------------------|-------------------------------------------------|------------------|------------------|---------------------------|
| Uganda               | Physical violence by firearm                    | 0 (0 to 0)       | 0 (0 to 0)       | 35.3% (18.9% to 53.6%)    |
| Uganda               | Physical violence by other means                | 6 (4 to 9)       | 6 (4 to 10)      | 7.4% (1.3% to 14.2%)      |
| Uganda               | Physical violence by sharp object               | 2 (1 to 3)       | 2 (1 to 3)       | 6.1% (-1.9% to 15%)       |
| Uganda               | Poisoning by carbon monoxide                    | 0 (0 to 0)       | 0 (0 to 0)       | 13.9% (2% to 26.1%)       |
| Uganda               | Poisoning by other means                        | 0 (0 to 0)       | 0 (0 to 0)       | -9.6% (-16.7% to -1.8%)   |
| Uganda               | Pulmonary aspiration and foreign body in airway | 0 (0 to 0)       | 0 (0 to 0)       | -16.5% (-26.1% to -4.6%)  |
| Uganda               | Self-harm by firearm                            | 0 (0 to 0)       | 0 (0 to 0)       | 10.5% (3.5% to 19.6%)     |
| Uganda               | Self-harm by other specified means              | 0 (0 to 0)       | 0 (0 to 0)       | 6.6% (0.9% to 13%)        |
| Uganda               | Unintentional firearm injuries                  | 1 (0 to 2)       | 1 (0 to 2)       | -16.2% (-24% to -8%)      |
| Uganda               | Venomous animal contact                         | 1 (0 to 2)       | 1 (0 to 2)       | -14.4% (-22.9% to -7%)    |
| Ukraine              | Adverse effects of medical treatment            | 0 (0 to 0)       | 0 (0 to 0)       | 0% (0% to 0%)             |
| Ukraine              | Conflict and terrorism                          | 0 (0 to 0)       | 3 (1 to 6)       | NA                        |
| Ukraine              | Cyclist road injuries                           | 54 (36 to 76)    | 48 (32 to 68)    | -11.4% (-16.6% to -5.1%)  |
| Ukraine              | Drowning                                        | 1 (1 to 2)       | 1 (0 to 1)       | -49.5% (-54.1% to -43.9%) |
| Ukraine              | Environmental heat and cold exposure            | 13 (9 to 18)     | 11 (8 to 16)     | -11% (-19.6% to -2.4%)    |
| Ukraine              | Executions and police conflict                  | 0 (0 to 0)       | 0 (0 to 0)       | NA                        |
| Ukraine              | Exposure to forces of nature                    | 0 (0 to 0)       | 0 (0 to 0)       | NA                        |
| Ukraine              | Falls                                           | 353 (268 to 470) | 279 (212 to 373) | -20.9% (-23.9% to -17.6%) |
| Ukraine              | Fire, heat, and hot substances                  | 5 (3 to 8)       | 4 (2 to 6)       | -21.1% (-24.8% to -17%)   |
| Ukraine              | Foreign body in eyes                            | 0 (0 to 0)       | 0 (0 to 0)       | 0.8% (0.4% to 1.3%)       |
| Ukraine              | Foreign body in other body part                 | 3 (1 to 5)       | 2 (1 to 5)       | -3.1% (-8.8% to 2%)       |
| Ukraine              | Motor vehicle road injuries                     | 149 (107 to 196) | 134 (96 to 178)  | -9.8% (-14.8% to -4.1%)   |
| Ukraine              | Motorcyclist road injuries                      | 20 (14 to 28)    | 16 (11 to 23)    | -20% (-26.1% to -13.5%)   |
| Ukraine              | Non-venomous animal contact                     | 5 (3 to 8)       | 5 (3 to 9)       | 4.9% (0.4% to 9.3%)       |
| Ukraine              | Other exposure to mechanical forces             | 81 (50 to 129)   | 78 (48 to 125)   | -3.5% (-8.1% to 1.3%)     |
| Ukraine              | Other road injuries                             | 3 (1 to 5)       | 2 (1 to 4)       | -5.6% (-12.8% to 2%)      |
| Ukraine              | Other transport injuries                        | 6 (4 to 8)       | 6 (5 to 9)       | 14.1% (5.7% to 25.4%)     |
| Ukraine              | Other unintentional injuries                    | 26 (16 to 44)    | 26 (16 to 42)    | -2.1% (-6.9% to 2.7%)     |
| Ukraine              | Pedestrian road injuries                        | 77 (56 to 101)   | 52 (37 to 69)    | -33.2% (-37.5% to -28.3%) |
| Ukraine              | Physical violence by firearm                    | 0 (0 to 0)       | 0 (0 to 0)       | 8.3% (-3.2% to 20.2%)     |
| Ukraine              | Physical violence by other means                | 39 (27 to 56)    | 35 (24 to 50)    | -9.8% (-14% to -5.4%)     |
| Ukraine              | Physical violence by sharp object               | 4 (3 to 7)       | 3 (2 to 6)       | -24% (-30.4% to -17.2%)   |
| Ukraine              | Poisoning by carbon monoxide                    | 0 (0 to 0)       | 0 (0 to 0)       | -39.2% (-46.2% to -31.8%) |
| Ukraine              | Poisoning by other means                        | 0 (0 to 1)       | 0 (0 to 0)       | -6.9% (-13.3% to -0.4%)   |
| Ukraine              | Pulmonary aspiration and foreign body in airway | 1 (1 to 2)       | 1 (1 to 2)       | -7% (-14.4% to 0.8%)      |
| Ukraine              | Self-harm by firearm                            | 1 (1 to 2)       | 1 (1 to 2)       | 0.3% (-13.8% to 15%)      |
| Ukraine              | Self-harm by other specified means              | 5 (3 to 8)       | 8 (5 to 12)      | 48.8% (36.6% to 62%)      |
| Ukraine              | Unintentional firearm injuries                  | 1 (1 to 2)       | 1 (1 to 2)       | -6.2% (-13.2% to 1.3%)    |
| Ukraine              | Venomous animal contact                         | 4 (2 to 7)       | 4 (2 to 8)       | 6% (0.6% to 11%)          |
| United Arab Emirates | Adverse effects of medical treatment            | 0 (0 to 0)       | 0 (0 to 0)       | 0% (0% to 0%)             |
| United Arab Emirates | Conflict and terrorism                          | 0 (0 to 0)       | 0 (0 to 0)       | NA                        |
| United Arab Emirates | Cyclist road injuries                           | 22 (15 to 31)    | 20 (14 to 28)    | -9.9% (-18.5% to -0.8%)   |
| United Arab Emirates | Drowning                                        | 0 (0 to 0)       | 0 (0 to 0)       | 36.2% (13.5% to 64.3%)    |

|                      |                                                 |                  |                  |                           |
|----------------------|-------------------------------------------------|------------------|------------------|---------------------------|
| United Arab Emirates | Environmental heat and cold exposure            | 4 (3 to 6)       | 4 (3 to 6)       | 1.7% (-3.3% to 7.2%)      |
| United Arab Emirates | Executions and police conflict                  | 0 (0 to 0)       | 0 (0 to 0)       | NA                        |
| United Arab Emirates | Exposure to forces of nature                    | 0 (0 to 0)       | 0 (0 to 0)       | NA                        |
| United Arab Emirates | Falls                                           | 101 (77 to 131)  | 114 (88 to 150)  | 13.5% (9.1% to 18.3%)     |
| United Arab Emirates | Fire, heat, and hot substances                  | 1 (0 to 1)       | 1 (0 to 1)       | -16.3% (-22.8% to -9.3%)  |
| United Arab Emirates | Foreign body in eyes                            | 0 (0 to 0)       | 0 (0 to 0)       | 1.7% (0.5% to 3.5%)       |
| United Arab Emirates | Foreign body in other body part                 | 1 (1 to 3)       | 1 (1 to 3)       | -1% (-7.2% to 4.9%)       |
| United Arab Emirates | Motor vehicle road injuries                     | 74 (58 to 93)    | 62 (48 to 78)    | -16.3% (-22.6% to -9.9%)  |
| United Arab Emirates | Motorcyclist road injuries                      | 17 (13 to 23)    | 15 (12 to 20)    | -10.5% (-19.4% to -0.8%)  |
| United Arab Emirates | Non-venomous animal contact                     | 2 (1 to 4)       | 2 (1 to 4)       | 9.3% (2.7% to 15.5%)      |
| United Arab Emirates | Other exposure to mechanical forces             | 34 (21 to 54)    | 29 (18 to 46)    | -14.4% (-19.9% to -9%)    |
| United Arab Emirates | Other road injuries                             | 2 (1 to 4)       | 2 (1 to 4)       | 5% (-6.3% to 19.4%)       |
| United Arab Emirates | Other transport injuries                        | 5 (4 to 7)       | 6 (4 to 8)       | 5.1% (-1.1% to 11.1%)     |
| United Arab Emirates | Other unintentional injuries                    | 20 (13 to 33)    | 18 (12 to 29)    | -10.9% (-17.5% to -4.7%)  |
| United Arab Emirates | Pedestrian road injuries                        | 52 (40 to 65)    | 35 (27 to 45)    | -32.2% (-37.9% to -26.3%) |
| United Arab Emirates | Physical violence by firearm                    | 0 (0 to 0)       | 1 (0 to 1)       | 110.7% (87.1% to 137.4%)  |
| United Arab Emirates | Physical violence by other means                | 13 (9 to 19)     | 12 (8 to 16)     | -10.9% (-16.7% to -4.8%)  |
| United Arab Emirates | Physical violence by sharp object               | 2 (1 to 3)       | 2 (1 to 3)       | -6.6% (-15.9% to 2.8%)    |
| United Arab Emirates | Poisoning by carbon monoxide                    | 0 (0 to 0)       | 0 (0 to 0)       | 31.2% (19.3% to 46.9%)    |
| United Arab Emirates | Poisoning by other means                        | 0 (0 to 0)       | 0 (0 to 0)       | -11.1% (-17.7% to -4.1%)  |
| United Arab Emirates | Pulmonary aspiration and foreign body in airway | 0 (0 to 1)       | 0 (0 to 1)       | -1.9% (-10.7% to 8.1%)    |
| United Arab Emirates | Self-harm by firearm                            | 0 (0 to 0)       | 0 (0 to 1)       | 3.4% (-7.8% to 16.1%)     |
| United Arab Emirates | Self-harm by other specified means              | 1 (1 to 2)       | 1 (1 to 2)       | 3.8% (-2.8% to 10.8%)     |
| United Arab Emirates | Unintentional firearm injuries                  | 2 (1 to 3)       | 2 (1 to 3)       | -5% (-13.8% to 4.9%)      |
| United Arab Emirates | Venomous animal contact                         | 1 (0 to 2)       | 1 (0 to 3)       | 7.9% (-0.4% to 14.9%)     |
| United Kingdom       | Adverse effects of medical treatment            | 0 (0 to 0)       | 0 (0 to 0)       | 0% (0% to 0%)             |
| United Kingdom       | Conflict and terrorism                          | 1 (0 to 3)       | 0 (0 to 0)       | NA                        |
| United Kingdom       | Cyclist road injuries                           | 21 (15 to 30)    | 16 (11 to 22)    | -26.8% (-30.2% to -23.4%) |
| United Kingdom       | Drowning                                        | 0 (0 to 0)       | 0 (0 to 0)       | -0.9% (-4.2% to 2.2%)     |
| United Kingdom       | Environmental heat and cold exposure            | 4 (2 to 6)       | 3 (2 to 5)       | -25.9% (-31.3% to -21.8%) |
| United Kingdom       | Executions and police conflict                  | 0 (0 to 0)       | 0 (0 to 0)       | NA                        |
| United Kingdom       | Exposure to forces of nature                    | 0 (0 to 0)       | 0 (0 to 0)       | NA                        |
| United Kingdom       | Falls                                           | 181 (139 to 239) | 218 (168 to 286) | 20.9% (18.2% to 23.8%)    |
| United Kingdom       | Fire, heat, and hot substances                  | 2 (1 to 4)       | 2 (1 to 3)       | -23.6% (-28.5% to -20%)   |
| United Kingdom       | Foreign body in eyes                            | 0 (0 to 0)       | 0 (0 to 0)       | 1.8% (1.3% to 2.6%)       |
| United Kingdom       | Foreign body in other body part                 | 2 (1 to 4)       | 2 (1 to 4)       | -0.1% (-1.1% to 0.8%)     |
| United Kingdom       | Motor vehicle road injuries                     | 26 (18 to 34)    | 15 (11 to 21)    | -39.6% (-42.5% to -36.8%) |
| United Kingdom       | Motorcyclist road injuries                      | 11 (8 to 15)     | 7 (5 to 9)       | -36.7% (-40% to -33.4%)   |
| United Kingdom       | Non-venomous animal contact                     | 3 (1 to 5)       | 2 (1 to 4)       | -7.8% (-8.5% to -6.9%)    |
| United Kingdom       | Other exposure to mechanical forces             | 49 (28 to 80)    | 46 (27 to 75)    | -6.4% (-10.8% to -2.9%)   |
| United Kingdom       | Other road injuries                             | 1 (1 to 2)       | 1 (1 to 2)       | -18.8% (-23.1% to -14.5%) |
| United Kingdom       | Other transport injuries                        | 4 (3 to 6)       | 4 (3 to 6)       | -6.4% (-8.9% to -4.1%)    |
| United Kingdom       | Other unintentional injuries                    | 31 (19 to 51)    | 23 (14 to 37)    | -26.9% (-31.4% to -22.3%) |

|                             |                                                 |               |               |                           |
|-----------------------------|-------------------------------------------------|---------------|---------------|---------------------------|
| United Kingdom              | Pedestrian road injuries                        | 10 (7 to 13)  | 5 (3 to 7)    | -50% (-54.1% to -46.3%)   |
| United Kingdom              | Physical violence by firearm                    | 0 (0 to 1)    | 1 (0 to 1)    | 45.9% (36.3% to 56.7%)    |
| United Kingdom              | Physical violence by other means                | 15 (10 to 22) | 13 (8 to 19)  | -16.1% (-20.6% to -12.1%) |
| United Kingdom              | Physical violence by sharp object               | 1 (1 to 2)    | 1 (1 to 2)    | -2.6% (-9.3% to 3.7%)     |
| United Kingdom              | Poisoning by carbon monoxide                    | 0 (0 to 0)    | 0 (0 to 0)    | 3.5% (-2.4% to 9.6%)      |
| United Kingdom              | Poisoning by other means                        | 0 (0 to 1)    | 0 (0 to 0)    | -26.5% (-30.7% to -23%)   |
| United Kingdom              | Pulmonary aspiration and foreign body in airway | 1 (0 to 1)    | 1 (0 to 1)    | -15.5% (-18.6% to -12.5%) |
| United Kingdom              | Self-harm by firearm                            | 0 (0 to 0)    | 0 (0 to 0)    | 2.4% (-3.1% to 8.2%)      |
| United Kingdom              | Self-harm by other specified means              | 3 (2 to 4)    | 2 (1 to 3)    | -24.1% (-27.2% to -21%)   |
| United Kingdom              | Unintentional firearm injuries                  | 1 (1 to 2)    | 1 (1 to 2)    | 2.3% (-1.7% to 5.8%)      |
| United Kingdom              | Venomous animal contact                         | 1 (0 to 3)    | 1 (0 to 2)    | -9.7% (-10.7% to -8.8%)   |
| United Republic of Tanzania | Adverse effects of medical treatment            | 0 (0 to 0)    | 0 (0 to 0)    | 0% (0% to 0%)             |
| United Republic of Tanzania | Conflict and terrorism                          | 0 (0 to 0)    | 0 (0 to 0)    | NA                        |
| United Republic of Tanzania | Cyclist road injuries                           | 36 (24 to 53) | 35 (23 to 50) | -3.8% (-10.2% to 4%)      |
| United Republic of Tanzania | Drowning                                        | 0 (0 to 0)    | 0 (0 to 0)    | -1% (-8.8% to 6.9%)       |
| United Republic of Tanzania | Environmental heat and cold exposure            | 0 (0 to 1)    | 0 (0 to 1)    | 0.5% (-5.2% to 6.1%)      |
| United Republic of Tanzania | Executions and police conflict                  | 0 (0 to 0)    | 0 (0 to 0)    | NA                        |
| United Republic of Tanzania | Exposure to forces of nature                    | 3 (2 to 6)    | 0 (0 to 0)    | NA                        |
| United Republic of Tanzania | Falls                                           | 25 (15 to 38) | 29 (18 to 44) | 16.1% (12.1% to 20.2%)    |
| United Republic of Tanzania | Fire, heat, and hot substances                  | 0 (0 to 1)    | 0 (0 to 1)    | -5.5% (-10% to -1.1%)     |
| United Republic of Tanzania | Foreign body in eyes                            | 0 (0 to 0)    | 0 (0 to 0)    | -0.1% (-0.3% to 0%)       |
| United Republic of Tanzania | Foreign body in other body part                 | 3 (1 to 8)    | 3 (1 to 7)    | -3.2% (-8% to 1%)         |
| United Republic of Tanzania | Motor vehicle road injuries                     | 35 (24 to 50) | 34 (23 to 48) | -2.1% (-10.5% to 6.2%)    |
| United Republic of Tanzania | Motorcyclist road injuries                      | 19 (13 to 27) | 17 (11 to 24) | -11.9% (-18.6% to -5%)    |
| United Republic of Tanzania | Non-venomous animal contact                     | 5 (2 to 11)   | 5 (2 to 9)    | -14.6% (-18.8% to -10.1%) |
| United Republic of Tanzania | Other exposure to mechanical forces             | 26 (13 to 48) | 26 (13 to 48) | -1.3% (-6.8% to 4.1%)     |
| United Republic of Tanzania | Other road injuries                             | 2 (1 to 4)    | 2 (1 to 4)    | -3% (-11.4% to 5.6%)      |
| United Republic of Tanzania | Other transport injuries                        | 3 (2 to 4)    | 3 (2 to 4)    | 0.1% (-4.7% to 5.4%)      |
| United Republic of Tanzania | Other unintentional injuries                    | 2 (1 to 4)    | 2 (1 to 4)    | -6.7% (-13% to -0.9%)     |
| United Republic of Tanzania | Pedestrian road injuries                        | 53 (39 to 70) | 49 (36 to 65) | -7.1% (-13% to -0.7%)     |
| United Republic of Tanzania | Physical violence by firearm                    | 0 (0 to 0)    | 0 (0 to 0)    | 32.8% (17.7% to 49%)      |
| United Republic of Tanzania | Physical violence by other means                | 7 (5 to 11)   | 7 (5 to 11)   | 2.3% (-3.9% to 8%)        |
| United Republic of Tanzania | Physical violence by sharp object               | 2 (1 to 4)    | 2 (1 to 4)    | 0.2% (-7.9% to 7.7%)      |
| United Republic of Tanzania | Poisoning by carbon monoxide                    | 0 (0 to 0)    | 0 (0 to 0)    | 11.4% (0.7% to 23.6%)     |
| United Republic of Tanzania | Poisoning by other means                        | 0 (0 to 0)    | 0 (0 to 0)    | -11% (-18.4% to -3.8%)    |
| United Republic of Tanzania | Pulmonary aspiration and foreign body in airway | 0 (0 to 0)    | 0 (0 to 0)    | -16.7% (-26.3% to -6.9%)  |
| United Republic of Tanzania | Self-harm by firearm                            | 0 (0 to 0)    | 0 (0 to 0)    | 2.6% (-4.3% to 10.9%)     |
| United Republic of Tanzania | Self-harm by other specified means              | 0 (0 to 0)    | 0 (0 to 0)    | -10.2% (-15.3% to -5.2%)  |
| United Republic of Tanzania | Unintentional firearm injuries                  | 1 (0 to 2)    | 1 (0 to 2)    | -9.2% (-16.6% to -1.2%)   |
| United Republic of Tanzania | Venomous animal contact                         | 1 (0 to 2)    | 1 (0 to 2)    | -11.1% (-17.6% to -3.9%)  |
| United States of America    | Adverse effects of medical treatment            | 0 (0 to 0)    | 0 (0 to 0)    | 0% (0% to 0%)             |
| United States of America    | Conflict and terrorism                          | 0 (0 to 0)    | 0 (0 to 0)    | NA                        |
| United States of America    | Cyclist road injuries                           | 11 (6 to 17)  | 9 (6 to 14)   | -14.3% (-24.4% to -3.2%)  |

|                              |                                                 |                 |                |                           |
|------------------------------|-------------------------------------------------|-----------------|----------------|---------------------------|
| United States of America     | Drowning                                        | 0 (0 to 0)      | 0 (0 to 0)     | -2.6% (-5.8% to 0.3%)     |
| United States of America     | Environmental heat and cold exposure            | 1 (0 to 1)      | 0 (0 to 1)     | -2.7% (-6% to 0.5%)       |
| United States of America     | Executions and police conflict                  | 0 (0 to 0)      | 0 (0 to 0)     | NA                        |
| United States of America     | Exposure to forces of nature                    | 0 (0 to 0)      | 0 (0 to 0)     | NA                        |
| United States of America     | Falls                                           | 89 (56 to 133)  | 90 (59 to 132) | 1.6% (-3.6% to 7.9%)      |
| United States of America     | Fire, heat, and hot substances                  | 1 (0 to 1)      | 0 (0 to 1)     | -30.1% (-33.7% to -26.8%) |
| United States of America     | Foreign body in eyes                            | 0 (0 to 0)      | 0 (0 to 0)     | -4.9% (-8.3% to -2%)      |
| United States of America     | Foreign body in other body part                 | 2 (1 to 5)      | 3 (1 to 6)     | 14.1% (9.5% to 20.3%)     |
| United States of America     | Motor vehicle road injuries                     | 81 (57 to 110)  | 65 (46 to 88)  | -19.5% (-23.5% to -15.8%) |
| United States of America     | Motorcyclist road injuries                      | 15 (10 to 22)   | 17 (11 to 24)  | 12.7% (3.3% to 23.5%)     |
| United States of America     | Non-venomous animal contact                     | 4 (2 to 7)      | 4 (2 to 8)     | 10.7% (7.7% to 14.3%)     |
| United States of America     | Other exposure to mechanical forces             | 102 (51 to 188) | 68 (34 to 128) | -33% (-36% to -30.5%)     |
| United States of America     | Other road injuries                             | 2 (1 to 4)      | 2 (1 to 3)     | -7% (-12.3% to -2%)       |
| United States of America     | Other transport injuries                        | 13 (9 to 18)    | 9 (6 to 13)    | -31.2% (-33% to -29.1%)   |
| United States of America     | Other unintentional injuries                    | 10 (6 to 17)    | 11 (6 to 19)   | 11.8% (6.2% to 16.8%)     |
| United States of America     | Pedestrian road injuries                        | 12 (8 to 18)    | 10 (7 to 15)   | -17.5% (-23.5% to -11.6%) |
| United States of America     | Physical violence by firearm                    | 4 (2 to 6)      | 4 (2 to 6)     | 1.2% (-6.6% to 9.7%)      |
| United States of America     | Physical violence by other means                | 34 (21 to 54)   | 28 (17 to 44)  | -18.2% (-21% to -15%)     |
| United States of America     | Physical violence by sharp object               | 6 (3 to 11)     | 4 (2 to 8)     | -31.2% (-35.4% to -27.3%) |
| United States of America     | Poisoning by carbon monoxide                    | 0 (0 to 0)      | 0 (0 to 0)     | -2.3% (-6.9% to 1.9%)     |
| United States of America     | Poisoning by other means                        | 0 (0 to 0)      | 0 (0 to 0)     | -19.9% (-23% to -16.9%)   |
| United States of America     | Pulmonary aspiration and foreign body in airway | 0 (0 to 0)      | 0 (0 to 0)     | 8.8% (4.7% to 13.6%)      |
| United States of America     | Self-harm by firearm                            | 0 (0 to 0)      | 0 (0 to 0)     | -3.9% (-10.3% to 2.4%)    |
| United States of America     | Self-harm by other specified means              | 1 (0 to 1)      | 1 (0 to 1)     | 14.1% (11.1% to 17.8%)    |
| United States of America     | Unintentional firearm injuries                  | 2 (1 to 4)      | 1 (0 to 2)     | -48.7% (-54.7% to -43.6%) |
| United States of America     | Venomous animal contact                         | 1 (0 to 2)      | 1 (0 to 2)     | -1.1% (-7% to 2.6%)       |
| United States Virgin Islands | Adverse effects of medical treatment            | 0 (0 to 0)      | 0 (0 to 0)     | 0% (0% to 0%)             |
| United States Virgin Islands | Conflict and terrorism                          | 0 (0 to 0)      | 0 (0 to 0)     | NA                        |
| United States Virgin Islands | Cyclist road injuries                           | 22 (14 to 34)   | 16 (10 to 23)  | -30.5% (-38.3% to -22.2%) |
| United States Virgin Islands | Drowning                                        | 0 (0 to 0)      | 0 (0 to 0)     | 23.1% (13.3% to 34.3%)    |
| United States Virgin Islands | Environmental heat and cold exposure            | 2 (1 to 3)      | 2 (1 to 3)     | -3.5% (-8.4% to 1.1%)     |
| United States Virgin Islands | Executions and police conflict                  | 0 (0 to 0)      | 0 (0 to 0)     | NA                        |
| United States Virgin Islands | Exposure to forces of nature                    | 0 (0 to 0)      | 0 (0 to 0)     | NA                        |
| United States Virgin Islands | Falls                                           | 26 (17 to 39)   | 36 (23 to 53)  | 38.3% (32.4% to 43.7%)    |
| United States Virgin Islands | Fire, heat, and hot substances                  | 1 (0 to 1)      | 1 (0 to 1)     | 1% (-4.9% to 6.6%)        |
| United States Virgin Islands | Foreign body in eyes                            | 0 (0 to 0)      | 0 (0 to 0)     | -0.1% (-0.4% to 0%)       |
| United States Virgin Islands | Foreign body in other body part                 | 1 (1 to 3)      | 1 (1 to 3)     | -1.3% (-7.4% to 5.2%)     |
| United States Virgin Islands | Motor vehicle road injuries                     | 40 (27 to 56)   | 27 (18 to 39)  | -32.2% (-39.1% to -24.9%) |
| United States Virgin Islands | Motorcyclist road injuries                      | 25 (18 to 35)   | 26 (19 to 35)  | 5.4% (-5.2% to 18.4%)     |
| United States Virgin Islands | Non-venomous animal contact                     | 2 (1 to 4)      | 2 (1 to 3)     | -17.9% (-21.7% to -13.2%) |
| United States Virgin Islands | Other exposure to mechanical forces             | 60 (30 to 107)  | 69 (35 to 125) | 16.1% (10% to 23.4%)      |
| United States Virgin Islands | Other road injuries                             | 6 (3 to 11)     | 4 (2 to 8)     | -21% (-29.5% to -10.6%)   |
| United States Virgin Islands | Other transport injuries                        | 4 (3 to 5)      | 3 (2 to 5)     | -6.7% (-13.4% to 0.6%)    |

|                              |                                                 |                  |                  |                           |
|------------------------------|-------------------------------------------------|------------------|------------------|---------------------------|
| United States Virgin Islands | Other unintentional injuries                    | 5 (3 to 9)       | 4 (2 to 8)       | -4.4% (-9.7% to 1.1%)     |
| United States Virgin Islands | Pedestrian road injuries                        | 30 (22 to 41)    | 18 (13 to 25)    | -39.4% (-45.3% to -33%)   |
| United States Virgin Islands | Physical violence by firearm                    | 5 (3 to 7)       | 6 (4 to 10)      | 38% (14.2% to 66.3%)      |
| United States Virgin Islands | Physical violence by other means                | 21 (13 to 33)    | 18 (11 to 29)    | -14% (-22.1% to -5.2%)    |
| United States Virgin Islands | Physical violence by sharp object               | 8 (4 to 14)      | 6 (3 to 11)      | -24.5% (-35.3% to -14.4%) |
| United States Virgin Islands | Poisoning by carbon monoxide                    | 0 (0 to 0)       | 0 (0 to 0)       | 7.4% (-2.2% to 18.8%)     |
| United States Virgin Islands | Poisoning by other means                        | 0 (0 to 0)       | 0 (0 to 0)       | -5.5% (-13.5% to 2.2%)    |
| United States Virgin Islands | Pulmonary aspiration and foreign body in airway | 0 (0 to 0)       | 0 (0 to 0)       | -14.4% (-24.6% to -3.2%)  |
| United States Virgin Islands | Self-harm by firearm                            | 0 (0 to 0)       | 0 (0 to 0)       | -6.3% (-13% to 1.4%)      |
| United States Virgin Islands | Self-harm by other specified means              | 0 (0 to 0)       | 0 (0 to 0)       | -29.5% (-36.6% to -21.1%) |
| United States Virgin Islands | Unintentional firearm injuries                  | 2 (1 to 5)       | 3 (1 to 6)       | 15.7% (6.8% to 25%)       |
| United States Virgin Islands | Venomous animal contact                         | 1 (0 to 3)       | 1 (0 to 3)       | -18.5% (-22.5% to -14%)   |
| Uruguay                      | Adverse effects of medical treatment            | 0 (0 to 0)       | 0 (0 to 0)       | 0% (0% to 0%)             |
| Uruguay                      | Conflict and terrorism                          | 0 (0 to 0)       | 0 (0 to 0)       | NA                        |
| Uruguay                      | Cyclist road injuries                           | 23 (16 to 31)    | 24 (17 to 33)    | 6.5% (-4.1% to 20.6%)     |
| Uruguay                      | Drowning                                        | 0 (0 to 0)       | 0 (0 to 0)       | 4% (-8% to 18%)           |
| Uruguay                      | Environmental heat and cold exposure            | 2 (1 to 2)       | 2 (1 to 3)       | 8.5% (4% to 13.7%)        |
| Uruguay                      | Executions and police conflict                  | 0 (0 to 0)       | 0 (0 to 0)       | NA                        |
| Uruguay                      | Exposure to forces of nature                    | 0 (0 to 0)       | 0 (0 to 0)       | NA                        |
| Uruguay                      | Falls                                           | 134 (103 to 173) | 150 (114 to 196) | 11.6% (7.7% to 15.4%)     |
| Uruguay                      | Fire, heat, and hot substances                  | 3 (2 to 5)       | 4 (2 to 6)       | 8.4% (3.1% to 13.8%)      |
| Uruguay                      | Foreign body in eyes                            | 0 (0 to 0)       | 0 (0 to 0)       | -0.1% (-0.2% to 0%)       |
| Uruguay                      | Foreign body in other body part                 | 2 (1 to 5)       | 2 (1 to 5)       | 0.1% (-4.6% to 5.8%)      |
| Uruguay                      | Motor vehicle road injuries                     | 39 (30 to 50)    | 40 (31 to 52)    | 2.4% (-7.6% to 13.4%)     |
| Uruguay                      | Motorcyclist road injuries                      | 11 (8 to 14)     | 19 (14 to 25)    | 79.7% (58.1% to 107.6%)   |
| Uruguay                      | Non-venomous animal contact                     | 5 (3 to 9)       | 4 (2 to 8)       | -11.5% (-15.5% to -7%)    |
| Uruguay                      | Other exposure to mechanical forces             | 154 (94 to 245)  | 112 (69 to 178)  | -27% (-34.6% to -17.5%)   |
| Uruguay                      | Other road injuries                             | 1 (1 to 2)       | 1 (1 to 2)       | -0.9% (-11.7% to 12.1%)   |
| Uruguay                      | Other transport injuries                        | 4 (3 to 5)       | 4 (3 to 5)       | 0.2% (-4.7% to 4.4%)      |
| Uruguay                      | Other unintentional injuries                    | 38 (25 to 59)    | 29 (19 to 46)    | -23.4% (-29.9% to -16.4%) |
| Uruguay                      | Pedestrian road injuries                        | 16 (12 to 20)    | 13 (10 to 16)    | -19.9% (-28.1% to -10%)   |
| Uruguay                      | Physical violence by firearm                    | 1 (1 to 1)       | 3 (2 to 4)       | 216.4% (166.7% to 277.3%) |
| Uruguay                      | Physical violence by other means                | 27 (20 to 38)    | 38 (27 to 54)    | 40.2% (24.4% to 56.2%)    |
| Uruguay                      | Physical violence by sharp object               | 4 (3 to 7)       | 7 (5 to 12)      | 81.5% (54.5% to 116.5%)   |
| Uruguay                      | Poisoning by carbon monoxide                    | 0 (0 to 0)       | 0 (0 to 0)       | 27.9% (16% to 41.3%)      |
| Uruguay                      | Poisoning by other means                        | 0 (0 to 1)       | 0 (0 to 1)       | -0.6% (-7.8% to 7.2%)     |
| Uruguay                      | Pulmonary aspiration and foreign body in airway | 1 (0 to 1)       | 1 (0 to 1)       | -30.8% (-37.3% to -24%)   |
| Uruguay                      | Self-harm by firearm                            | 1 (1 to 1)       | 1 (1 to 2)       | 27.1% (10.3% to 44.7%)    |
| Uruguay                      | Self-harm by other specified means              | 2 (1 to 3)       | 3 (2 to 5)       | 90.6% (77.3% to 105.4%)   |
| Uruguay                      | Unintentional firearm injuries                  | 23 (14 to 33)    | 10 (6 to 15)     | -57.7% (-64.1% to -50.9%) |
| Uruguay                      | Venomous animal contact                         | 3 (1 to 6)       | 3 (1 to 6)       | -15.9% (-20.5% to -11.3%) |
| Uzbekistan                   | Adverse effects of medical treatment            | 0 (0 to 0)       | 0 (0 to 0)       | 0% (0% to 0%)             |
| Uzbekistan                   | Conflict and terrorism                          | 0 (0 to 0)       | 0 (0 to 0)       | NA                        |

|            |                                                 |                 |                 |                           |
|------------|-------------------------------------------------|-----------------|-----------------|---------------------------|
| Uzbekistan | Cyclist road injuries                           | 20 (13 to 27)   | 23 (16 to 31)   | 14.4% (1.8% to 24.6%)     |
| Uzbekistan | Drowning                                        | 1 (0 to 1)      | 1 (0 to 1)      | 1.4% (-8.3% to 11.5%)     |
| Uzbekistan | Environmental heat and cold exposure            | 5 (4 to 7)      | 4 (3 to 6)      | -19.6% (-27.7% to -12.4%) |
| Uzbekistan | Executions and police conflict                  | 0 (0 to 0)      | 0 (0 to 0)      | NA                        |
| Uzbekistan | Exposure to forces of nature                    | 0 (0 to 0)      | 0 (0 to 0)      | NA                        |
| Uzbekistan | Falls                                           | 123 (94 to 162) | 120 (91 to 160) | -1.9% (-7.5% to 3.3%)     |
| Uzbekistan | Fire, heat, and hot substances                  | 4 (3 to 8)      | 3 (2 to 6)      | -24.3% (-30.8% to -16.8%) |
| Uzbekistan | Foreign body in eyes                            | 0 (0 to 0)      | 0 (0 to 0)      | 0.8% (0.4% to 1.4%)       |
| Uzbekistan | Foreign body in other body part                 | 2 (1 to 4)      | 2 (1 to 4)      | -1.9% (-7.3% to 4.3%)     |
| Uzbekistan | Motor vehicle road injuries                     | 50 (40 to 63)   | 63 (49 to 79)   | 25.2% (11.8% to 38.3%)    |
| Uzbekistan | Motorcyclist road injuries                      | 3 (2 to 5)      | 4 (3 to 5)      | 7.9% (-5.5% to 21.9%)     |
| Uzbekistan | Non-venomous animal contact                     | 3 (2 to 5)      | 3 (1 to 5)      | -12% (-17.4% to -6.1%)    |
| Uzbekistan | Other exposure to mechanical forces             | 47 (28 to 75)   | 50 (30 to 79)   | 5.7% (0.9% to 11.1%)      |
| Uzbekistan | Other road injuries                             | 2 (1 to 3)      | 2 (1 to 3)      | 12.3% (-2.1% to 24.9%)    |
| Uzbekistan | Other transport injuries                        | 4 (3 to 6)      | 4 (3 to 6)      | 1.5% (-3.6% to 7.2%)      |
| Uzbekistan | Other unintentional injuries                    | 32 (21 to 52)   | 26 (17 to 42)   | -19.9% (-27% to -12.5%)   |
| Uzbekistan | Pedestrian road injuries                        | 30 (23 to 37)   | 31 (24 to 40)   | 5.5% (-6.9% to 17.9%)     |
| Uzbekistan | Physical violence by firearm                    | 0 (0 to 0)      | 0 (0 to 0)      | 70.6% (44.5% to 100.4%)   |
| Uzbekistan | Physical violence by other means                | 16 (11 to 22)   | 12 (8 to 17)    | -24.6% (-34.4% to -14.7%) |
| Uzbekistan | Physical violence by sharp object               | 4 (2 to 6)      | 2 (1 to 4)      | -37% (-46.7% to -27.2%)   |
| Uzbekistan | Poisoning by carbon monoxide                    | 0 (0 to 0)      | 0 (0 to 0)      | 19.7% (9.9% to 31.4%)     |
| Uzbekistan | Poisoning by other means                        | 0 (0 to 1)      | 0 (0 to 1)      | -4.1% (-9.7% to 3.3%)     |
| Uzbekistan | Pulmonary aspiration and foreign body in airway | 1 (1 to 2)      | 1 (0 to 1)      | -12% (-19.4% to -4.1%)    |
| Uzbekistan | Self-harm by firearm                            | 0 (0 to 0)      | 0 (0 to 0)      | 24.6% (4% to 46.7%)       |
| Uzbekistan | Self-harm by other specified means              | 2 (1 to 3)      | 3 (2 to 5)      | 65.1% (53.7% to 75.9%)    |
| Uzbekistan | Unintentional firearm injuries                  | 1 (1 to 2)      | 1 (1 to 2)      | 4% (-4.9% to 13.2%)       |
| Uzbekistan | Venomous animal contact                         | 3 (1 to 6)      | 3 (1 to 5)      | -11.7% (-16.7% to -5.9%)  |
| Vanuatu    | Adverse effects of medical treatment            | 0 (0 to 0)      | 0 (0 to 0)      | 0% (0% to 0%)             |
| Vanuatu    | Conflict and terrorism                          | 0 (0 to 0)      | 0 (0 to 0)      | NA                        |
| Vanuatu    | Cyclist road injuries                           | 13 (8 to 18)    | 13 (9 to 19)    | 5.8% (-1.2% to 13.1%)     |
| Vanuatu    | Drowning                                        | 0 (0 to 1)      | 0 (0 to 1)      | -1.4% (-9.9% to 8.6%)     |
| Vanuatu    | Environmental heat and cold exposure            | 2 (1 to 3)      | 2 (1 to 3)      | -4.2% (-9.5% to 1%)       |
| Vanuatu    | Executions and police conflict                  | 0 (0 to 0)      | 0 (0 to 0)      | NA                        |
| Vanuatu    | Exposure to forces of nature                    | 0 (0 to 0)      | 0 (0 to 0)      | NA                        |
| Vanuatu    | Falls                                           | 43 (34 to 57)   | 59 (46 to 78)   | 36.8% (31.3% to 42.4%)    |
| Vanuatu    | Fire, heat, and hot substances                  | 1 (1 to 2)      | 1 (1 to 2)      | -4.2% (-9.4% to 1.7%)     |
| Vanuatu    | Foreign body in eyes                            | 0 (0 to 0)      | 0 (0 to 0)      | -1.3% (-2.1% to -0.8%)    |
| Vanuatu    | Foreign body in other body part                 | 1 (0 to 1)      | 1 (0 to 1)      | -4% (-8.4% to 0.6%)       |
| Vanuatu    | Motor vehicle road injuries                     | 29 (22 to 37)   | 29 (22 to 37)   | -0.5% (-7.9% to 6.7%)     |
| Vanuatu    | Motorcyclist road injuries                      | 15 (11 to 19)   | 17 (13 to 22)   | 14.9% (5.1% to 25%)       |
| Vanuatu    | Non-venomous animal contact                     | 5 (3 to 9)      | 5 (3 to 8)      | -16% (-20.2% to -11.3%)   |
| Vanuatu    | Other exposure to mechanical forces             | 14 (8 to 23)    | 12 (7 to 19)    | -15.9% (-21.2% to -11.4%) |
| Vanuatu    | Other road injuries                             | 2 (1 to 3)      | 2 (1 to 3)      | 3.8% (-5.3% to 12.8%)     |



|                                    |                                                 |                 |                |                           |
|------------------------------------|-------------------------------------------------|-----------------|----------------|---------------------------|
| Vanuatu                            | Other transport injuries                        | 7 (5 to 9)      | 6 (5 to 8)     | -7.3% (-12% to -2.8%)     |
| Vanuatu                            | Other unintentional injuries                    | 7 (5 to 12)     | 7 (4 to 11)    | -7.4% (-11.6% to -2.7%)   |
| Vanuatu                            | Pedestrian road injuries                        | 18 (13 to 23)   | 19 (14 to 24)  | 6% (-1% to 13.2%)         |
| Vanuatu                            | Physical violence by firearm                    | 0 (0 to 0)      | 0 (0 to 0)     | 19.2% (7% to 32.2%)       |
| Vanuatu                            | Physical violence by other means                | 14 (10 to 20)   | 15 (10 to 21)  | 1.8% (-3.1% to 7.8%)      |
| Vanuatu                            | Physical violence by sharp object               | 2 (1 to 3)      | 1 (1 to 2)     | -6.5% (-14.5% to 1.6%)    |
| Vanuatu                            | Poisoning by carbon monoxide                    | 0 (0 to 0)      | 0 (0 to 0)     | 0.4% (-9.5% to 10.2%)     |
| Vanuatu                            | Poisoning by other means                        | 0 (0 to 0)      | 0 (0 to 0)     | -17.5% (-24.2% to -10.4%) |
| Vanuatu                            | Pulmonary aspiration and foreign body in airway | 0 (0 to 0)      | 0 (0 to 0)     | 0.4% (-11.5% to 12.8%)    |
| Vanuatu                            | Self-harm by firearm                            | 1 (1 to 2)      | 1 (1 to 2)     | -3.3% (-16.2% to 10.5%)   |
| Vanuatu                            | Self-harm by other specified means              | 2 (1 to 4)      | 2 (2 to 4)     | 4.6% (-3.2% to 12.6%)     |
| Vanuatu                            | Unintentional firearm injuries                  | 2 (1 to 3)      | 2 (1 to 3)     | -23.9% (-30.6% to -17.5%) |
| Vanuatu                            | Venomous animal contact                         | 3 (1 to 6)      | 3 (1 to 6)     | -9.4% (-15% to -3%)       |
| Venezuela (Bolivarian Republic of) | Adverse effects of medical treatment            | 0 (0 to 0)      | 0 (0 to 0)     | 0% (0% to 0%)             |
| Venezuela (Bolivarian Republic of) | Conflict and terrorism                          | 2 (1 to 5)      | 0 (0 to 0)     | NA                        |
| Venezuela (Bolivarian Republic of) | Cyclist road injuries                           | 31 (21 to 43)   | 21 (14 to 30)  | -31.6% (-40.3% to -22.6%) |
| Venezuela (Bolivarian Republic of) | Drowning                                        | 0 (0 to 0)      | 0 (0 to 0)     | 10.3% (-4.6% to 27.7%)    |
| Venezuela (Bolivarian Republic of) | Environmental heat and cold exposure            | 3 (2 to 4)      | 3 (2 to 4)     | -0.1% (-4.8% to 4%)       |
| Venezuela (Bolivarian Republic of) | Executions and police conflict                  | 0 (0 to 0)      | 0 (0 to 0)     | NA                        |
| Venezuela (Bolivarian Republic of) | Exposure to forces of nature                    | 0 (0 to 0)      | 0 (0 to 0)     | NA                        |
| Venezuela (Bolivarian Republic of) | Falls                                           | 101 (78 to 132) | 93 (71 to 125) | -7.4% (-12.6% to -2.2%)   |
| Venezuela (Bolivarian Republic of) | Fire, heat, and hot substances                  | 4 (2 to 6)      | 3 (2 to 6)     | -7.8% (-12.6% to -2.2%)   |
| Venezuela (Bolivarian Republic of) | Foreign body in eyes                            | 0 (0 to 0)      | 0 (0 to 0)     | -0.3% (-0.6% to -0.1%)    |
| Venezuela (Bolivarian Republic of) | Foreign body in other body part                 | 1 (1 to 3)      | 1 (1 to 2)     | -12.8% (-18.7% to -7.8%)  |
| Venezuela (Bolivarian Republic of) | Motor vehicle road injuries                     | 56 (43 to 72)   | 48 (37 to 61)  | -14.9% (-24.9% to -4.3%)  |
| Venezuela (Bolivarian Republic of) | Motorcyclist road injuries                      | 15 (12 to 20)   | 17 (13 to 22)  | 10.8% (-3.3% to 27.5%)    |
| Venezuela (Bolivarian Republic of) | Non-venomous animal contact                     | 6 (3 to 11)     | 5 (3 to 9)     | -14.4% (-19.6% to -9.1%)  |
| Venezuela (Bolivarian Republic of) | Other exposure to mechanical forces             | 53 (31 to 87)   | 57 (33 to 92)  | 6.9% (-1.2% to 16.9%)     |
| Venezuela (Bolivarian Republic of) | Other road injuries                             | 8 (5 to 13)     | 6 (4 to 10)    | -21% (-31.3% to -9.8%)    |
| Venezuela (Bolivarian Republic of) | Other transport injuries                        | 5 (4 to 7)      | 5 (4 to 7)     | 1.8% (-4.1% to 9.2%)      |
| Venezuela (Bolivarian Republic of) | Other unintentional injuries                    | 13 (9 to 21)    | 11 (7 to 18)   | -18.2% (-24.6% to -11.2%) |
| Venezuela (Bolivarian Republic of) | Pedestrian road injuries                        | 47 (37 to 59)   | 28 (22 to 35)  | -40.1% (-47% to -32.7%)   |
| Venezuela (Bolivarian Republic of) | Physical violence by firearm                    | 3 (2 to 4)      | 13 (9 to 17)   | 325% (234.1% to 456.9%)   |
| Venezuela (Bolivarian Republic of) | Physical violence by other means                | 21 (15 to 30)   | 33 (23 to 50)  | 58.5% (35.9% to 86.2%)    |
| Venezuela (Bolivarian Republic of) | Physical violence by sharp object               | 8 (5 to 12)     | 8 (5 to 14)    | 9% (-11.3% to 30.1%)      |
| Venezuela (Bolivarian Republic of) | Poisoning by carbon monoxide                    | 0 (0 to 0)      | 0 (0 to 0)     | 15.7% (4.4% to 28.2%)     |
| Venezuela (Bolivarian Republic of) | Poisoning by other means                        | 0 (0 to 0)      | 0 (0 to 0)     | -10.3% (-17% to -3.1%)    |
| Venezuela (Bolivarian Republic of) | Pulmonary aspiration and foreign body in airway | 1 (0 to 1)      | 1 (0 to 1)     | -31% (-38.8% to -22.8%)   |
| Venezuela (Bolivarian Republic of) | Self-harm by firearm                            | 0 (0 to 1)      | 0 (0 to 1)     | 34.9% (20.5% to 52.9%)    |
| Venezuela (Bolivarian Republic of) | Self-harm by other specified means              | 0 (0 to 1)      | 0 (0 to 1)     | 23.6% (12.5% to 35.6%)    |
| Venezuela (Bolivarian Republic of) | Unintentional firearm injuries                  | 7 (4 to 10)     | 8 (5 to 11)    | 13.3% (-0.8% to 30.6%)    |
| Venezuela (Bolivarian Republic of) | Venomous animal contact                         | 8 (4 to 14)     | 7 (3 to 13)    | -7.6% (-12.1% to -2%)     |
| Viet Nam                           | Adverse effects of medical treatment            | 0 (0 to 0)      | 0 (0 to 0)     | 0% (0% to 0%)             |

|          |                                                 |               |                  |                           |
|----------|-------------------------------------------------|---------------|------------------|---------------------------|
| Viet Nam | Conflict and terrorism                          | 0 (0 to 0)    | 0 (0 to 0)       | NA                        |
| Viet Nam | Cyclist road injuries                           | 18 (12 to 25) | 25 (18 to 35)    | 40.6% (28.1% to 54.1%)    |
| Viet Nam | Drowning                                        | 1 (0 to 1)    | 1 (0 to 1)       | 25% (11.3% to 41%)        |
| Viet Nam | Environmental heat and cold exposure            | 2 (1 to 2)    | 2 (1 to 2)       | 1.9% (-4.1% to 6.5%)      |
| Viet Nam | Executions and police conflict                  | 0 (0 to 0)    | 0 (0 to 0)       | NA                        |
| Viet Nam | Exposure to forces of nature                    | 1 (1 to 3)    | 0 (0 to 0)       | NA                        |
| Viet Nam | Falls                                           | 64 (51 to 82) | 107 (85 to 134)  | 65.7% (59.5% to 71.9%)    |
| Viet Nam | Fire, heat, and hot substances                  | 2 (1 to 3)    | 2 (1 to 3)       | 14% (6.9% to 21.5%)       |
| Viet Nam | Foreign body in eyes                            | 0 (0 to 0)    | 0 (0 to 0)       | 2.4% (1.6% to 3.4%)       |
| Viet Nam | Foreign body in other body part                 | 1 (1 to 2)    | 1 (1 to 2)       | -0.5% (-7% to 8.8%)       |
| Viet Nam | Motor vehicle road injuries                     | 35 (26 to 45) | 44 (33 to 57)    | 27.6% (16.9% to 40%)      |
| Viet Nam | Motorcyclist road injuries                      | 43 (34 to 55) | 63 (50 to 78)    | 44.1% (32.2% to 58.4%)    |
| Viet Nam | Non-venomous animal contact                     | 6 (3 to 10)   | 5 (3 to 8)       | -23.2% (-29.5% to -16.3%) |
| Viet Nam | Other exposure to mechanical forces             | 29 (17 to 47) | 25 (15 to 40)    | -14.7% (-20% to -8.1%)    |
| Viet Nam | Other road injuries                             | 1 (1 to 2)    | 1 (1 to 2)       | 27.7% (15.8% to 42.2%)    |
| Viet Nam | Other transport injuries                        | 5 (4 to 7)    | 6 (4 to 8)       | 7.2% (-0.2% to 14.6%)     |
| Viet Nam | Other unintentional injuries                    | 9 (6 to 15)   | 7 (4 to 11)      | -27.3% (-32.5% to -22.1%) |
| Viet Nam | Pedestrian road injuries                        | 18 (13 to 22) | 15 (11 to 19)    | -14.3% (-21.5% to -7%)    |
| Viet Nam | Physical violence by firearm                    | 0 (0 to 0)    | 0 (0 to 1)       | 136% (109.4% to 168%)     |
| Viet Nam | Physical violence by other means                | 18 (13 to 26) | 19 (14 to 26)    | 2% (-4.1% to 9.4%)        |
| Viet Nam | Physical violence by sharp object               | 3 (2 to 5)    | 2 (1 to 4)       | -26.3% (-34.9% to -16.6%) |
| Viet Nam | Poisoning by carbon monoxide                    | 0 (0 to 0)    | 0 (0 to 0)       | 9.8% (-1.8% to 22.7%)     |
| Viet Nam | Poisoning by other means                        | 0 (0 to 0)    | 0 (0 to 0)       | -34.9% (-42.5% to -26.1%) |
| Viet Nam | Pulmonary aspiration and foreign body in airway | 0 (0 to 1)    | 0 (0 to 0)       | -23.5% (-30.6% to -15.3%) |
| Viet Nam | Self-harm by firearm                            | 0 (0 to 0)    | 0 (0 to 0)       | 93.3% (65.7% to 133.7%)   |
| Viet Nam | Self-harm by other specified means              | 2 (1 to 3)    | 2 (1 to 3)       | 12% (6.1% to 18.7%)       |
| Viet Nam | Unintentional firearm injuries                  | 3 (2 to 5)    | 2 (1 to 3)       | -33.6% (-40.9% to -24.8%) |
| Viet Nam | Venomous animal contact                         | 2 (1 to 5)    | 2 (1 to 4)       | -25.2% (-32.8% to -16.9%) |
| Yemen    | Adverse effects of medical treatment            | 0 (0 to 0)    | 0 (0 to 0)       | 0% (0% to 0%)             |
| Yemen    | Conflict and terrorism                          | 0 (0 to 0)    | 256 (103 to 590) | NA                        |
| Yemen    | Cyclist road injuries                           | 15 (9 to 21)  | 14 (9 to 20)     | -4.3% (-12.2% to 5.5%)    |
| Yemen    | Drowning                                        | 0 (0 to 0)    | 0 (0 to 0)       | -25.8% (-32.7% to -17.8%) |
| Yemen    | Environmental heat and cold exposure            | 3 (2 to 4)    | 3 (2 to 4)       | 0.9% (-4.5% to 5.9%)      |
| Yemen    | Executions and police conflict                  | 0 (0 to 0)    | 0 (0 to 0)       | NA                        |
| Yemen    | Exposure to forces of nature                    | 0 (0 to 0)    | 0 (0 to 0)       | NA                        |
| Yemen    | Falls                                           | 66 (50 to 86) | 77 (59 to 99)    | 17% (12.5% to 22%)        |
| Yemen    | Fire, heat, and hot substances                  | 1 (1 to 2)    | 1 (0 to 1)       | -34.2% (-39.8% to -28.7%) |
| Yemen    | Foreign body in eyes                            | 0 (0 to 0)    | 0 (0 to 0)       | 0.7% (0% to 1.9%)         |
| Yemen    | Foreign body in other body part                 | 1 (1 to 3)    | 1 (1 to 3)       | -1.5% (-7.3% to 3.4%)     |
| Yemen    | Motor vehicle road injuries                     | 47 (37 to 60) | 39 (30 to 49)    | -17.8% (-24% to -10.9%)   |
| Yemen    | Motorcyclist road injuries                      | 11 (8 to 15)  | 9 (7 to 12)      | -19.3% (-26.8% to -10.8%) |
| Yemen    | Non-venomous animal contact                     | 4 (2 to 7)    | 4 (2 to 8)       | 8.8% (3.4% to 14.1%)      |
| Yemen    | Other exposure to mechanical forces             | 27 (17 to 43) | 23 (14 to 37)    | -15.2% (-20.3% to -9.8%)  |

|        |                                                 |               |               |                           |
|--------|-------------------------------------------------|---------------|---------------|---------------------------|
| Yemen  | Other road injuries                             | 2 (1 to 3)    | 2 (1 to 3)    | 0.8% (-8.6% to 11.7%)     |
| Yemen  | Other transport injuries                        | 5 (4 to 7)    | 5 (4 to 7)    | 2.1% (-3.4% to 7.9%)      |
| Yemen  | Other unintentional injuries                    | 21 (14 to 34) | 16 (11 to 26) | -24% (-27.9% to -19.7%)   |
| Yemen  | Pedestrian road injuries                        | 30 (23 to 38) | 26 (20 to 33) | -14% (-20.2% to -7.1%)    |
| Yemen  | Physical violence by firearm                    | 0 (0 to 0)    | 0 (0 to 0)    | 116.3% (90.7% to 145.2%)  |
| Yemen  | Physical violence by other means                | 10 (7 to 14)  | 13 (9 to 19)  | 28.9% (18.4% to 41%)      |
| Yemen  | Physical violence by sharp object               | 1 (1 to 2)    | 1 (1 to 2)    | -10.4% (-18.8% to -0.7%)  |
| Yemen  | Poisoning by carbon monoxide                    | 0 (0 to 0)    | 0 (0 to 0)    | 13.1% (-0.5% to 29.7%)    |
| Yemen  | Poisoning by other means                        | 0 (0 to 0)    | 0 (0 to 0)    | -31.1% (-38% to -23.3%)   |
| Yemen  | Pulmonary aspiration and foreign body in airway | 0 (0 to 1)    | 0 (0 to 1)    | -14.1% (-22.4% to -2.7%)  |
| Yemen  | Self-harm by firearm                            | 0 (0 to 0)    | 0 (0 to 0)    | 19% (6% to 34.3%)         |
| Yemen  | Self-harm by other specified means              | 1 (1 to 2)    | 1 (1 to 2)    | 11.6% (5.9% to 17.3%)     |
| Yemen  | Unintentional firearm injuries                  | 2 (1 to 3)    | 1 (1 to 2)    | -16.5% (-24.2% to -7.8%)  |
| Yemen  | Venomous animal contact                         | 2 (1 to 4)    | 2 (1 to 5)    | 10.3% (3.7% to 17.9%)     |
| Zambia | Adverse effects of medical treatment            | 0 (0 to 0)    | 0 (0 to 0)    | 0% (0% to 0%)             |
| Zambia | Conflict and terrorism                          | 3 (1 to 7)    | 0 (0 to 0)    | NA                        |
| Zambia | Cyclist road injuries                           | 34 (23 to 48) | 34 (23 to 48) | 1.6% (-6% to 9.9%)        |
| Zambia | Drowning                                        | 0 (0 to 0)    | 0 (0 to 0)    | -8.7% (-16.9% to 0.5%)    |
| Zambia | Environmental heat and cold exposure            | 0 (0 to 1)    | 0 (0 to 1)    | -3.1% (-10% to 4.8%)      |
| Zambia | Executions and police conflict                  | 0 (0 to 0)    | 0 (0 to 0)    | NA                        |
| Zambia | Exposure to forces of nature                    | 0 (0 to 0)    | 0 (0 to 0)    | NA                        |
| Zambia | Falls                                           | 25 (16 to 38) | 31 (20 to 48) | 22.9% (17.6% to 28.3%)    |
| Zambia | Fire, heat, and hot substances                  | 0 (0 to 1)    | 0 (0 to 1)    | -16.2% (-21.5% to -10.5%) |
| Zambia | Foreign body in eyes                            | 0 (0 to 0)    | 0 (0 to 0)    | -0.6% (-1.8% to 0.1%)     |
| Zambia | Foreign body in other body part                 | 3 (1 to 7)    | 3 (1 to 7)    | 6.9% (1.5% to 13.4%)      |
| Zambia | Motor vehicle road injuries                     | 25 (17 to 36) | 25 (17 to 36) | 0.1% (-8.2% to 9.7%)      |
| Zambia | Motorcyclist road injuries                      | 11 (8 to 16)  | 10 (7 to 14)  | -11.2% (-18.4% to -3.3%)  |
| Zambia | Non-venomous animal contact                     | 5 (2 to 11)   | 4 (2 to 9)    | -18.4% (-23.2% to -13%)   |
| Zambia | Other exposure to mechanical forces             | 27 (13 to 49) | 24 (12 to 44) | -9.9% (-16.4% to -2.2%)   |
| Zambia | Other road injuries                             | 1 (0 to 2)    | 1 (1 to 2)    | 14.8% (4.9% to 26%)       |
| Zambia | Other transport injuries                        | 4 (3 to 5)    | 3 (2 to 4)    | -14.6% (-20.4% to -9.1%)  |
| Zambia | Other unintentional injuries                    | 3 (2 to 4)    | 2 (1 to 4)    | -13.2% (-21.7% to -4.8%)  |
| Zambia | Pedestrian road injuries                        | 49 (36 to 65) | 46 (34 to 60) | -6.5% (-12.5% to 0.1%)    |
| Zambia | Physical violence by firearm                    | 0 (0 to 0)    | 0 (0 to 0)    | 100.3% (77.4% to 127.1%)  |
| Zambia | Physical violence by other means                | 7 (4 to 10)   | 9 (6 to 14)   | 41.4% (29% to 54.8%)      |
| Zambia | Physical violence by sharp object               | 2 (1 to 3)    | 3 (1 to 5)    | 51.9% (34.5% to 76.1%)    |
| Zambia | Poisoning by carbon monoxide                    | 0 (0 to 0)    | 0 (0 to 0)    | 12.8% (-1.2% to 27.7%)    |
| Zambia | Poisoning by other means                        | 0 (0 to 0)    | 0 (0 to 0)    | -22.7% (-31.3% to -14.4%) |
| Zambia | Pulmonary aspiration and foreign body in airway | 0 (0 to 0)    | 0 (0 to 0)    | -13.5% (-23.7% to -1.6%)  |
| Zambia | Self-harm by firearm                            | 0 (0 to 0)    | 0 (0 to 0)    | 35% (23.8% to 48.6%)      |
| Zambia | Self-harm by other specified means              | 0 (0 to 0)    | 0 (0 to 0)    | 6.1% (-0.6% to 13.6%)     |
| Zambia | Unintentional firearm injuries                  | 1 (0 to 2)    | 1 (0 to 2)    | -21.4% (-29.9% to -11.9%) |
| Zambia | Venomous animal contact                         | 1 (0 to 2)    | 1 (0 to 2)    | -18% (-27% to -8.4%)      |

|          |                                                 |               |               |                           |
|----------|-------------------------------------------------|---------------|---------------|---------------------------|
| Zimbabwe | Adverse effects of medical treatment            | 0 (0 to 0)    | 0 (0 to 0)    | 0% (0% to 0%)             |
| Zimbabwe | Conflict and terrorism                          | 1 (0 to 3)    | 0 (0 to 1)    | NA                        |
| Zimbabwe | Cyclist road injuries                           | 10 (6 to 16)  | 13 (8 to 19)  | 24.1% (10.4% to 40.6%)    |
| Zimbabwe | Drowning                                        | 0 (0 to 0)    | 0 (0 to 0)    | -14.4% (-21.5% to -7.2%)  |
| Zimbabwe | Environmental heat and cold exposure            | 0 (0 to 1)    | 0 (0 to 1)    | -1% (-7.7% to 5.2%)       |
| Zimbabwe | Executions and police conflict                  | 0 (0 to 0)    | 0 (0 to 1)    | NA                        |
| Zimbabwe | Exposure to forces of nature                    | 0 (0 to 0)    | 9 (4 to 20)   | NA                        |
| Zimbabwe | Falls                                           | 22 (14 to 33) | 22 (14 to 33) | 0.1% (-3.4% to 3.9%)      |
| Zimbabwe | Fire, heat, and hot substances                  | 0 (0 to 0)    | 0 (0 to 0)    | 6.1% (-0.3% to 11.8%)     |
| Zimbabwe | Foreign body in eyes                            | 0 (0 to 0)    | 0 (0 to 0)    | -1.4% (-3.1% to -0.3%)    |
| Zimbabwe | Foreign body in other body part                 | 4 (2 to 9)    | 4 (2 to 9)    | -4.7% (-10.4% to 1.7%)    |
| Zimbabwe | Motor vehicle road injuries                     | 19 (12 to 27) | 23 (16 to 33) | 22.3% (8.7% to 38.2%)     |
| Zimbabwe | Motorcyclist road injuries                      | 10 (7 to 15)  | 9 (6 to 12)   | -17.2% (-25.4% to -7.7%)  |
| Zimbabwe | Non-venomous animal contact                     | 3 (2 to 7)    | 3 (2 to 7)    | 5.4% (-0.4% to 10.8%)     |
| Zimbabwe | Other exposure to mechanical forces             | 24 (12 to 43) | 22 (11 to 39) | -7.4% (-12.2% to -2%)     |
| Zimbabwe | Other road injuries                             | 2 (1 to 3)    | 2 (1 to 4)    | 37.8% (20% to 63.2%)      |
| Zimbabwe | Other transport injuries                        | 4 (3 to 6)    | 5 (4 to 7)    | 15.1% (8.2% to 23.1%)     |
| Zimbabwe | Other unintentional injuries                    | 3 (2 to 5)    | 3 (2 to 4)    | -7.1% (-11.3% to -2.1%)   |
| Zimbabwe | Pedestrian road injuries                        | 45 (34 to 57) | 30 (22 to 39) | -32.5% (-38.5% to -26.4%) |
| Zimbabwe | Physical violence by firearm                    | 0 (0 to 0)    | 0 (0 to 0)    | -7.2% (-17.6% to 3%)      |
| Zimbabwe | Physical violence by other means                | 10 (7 to 15)  | 11 (7 to 16)  | 5.6% (-3.4% to 16.4%)     |
| Zimbabwe | Physical violence by sharp object               | 2 (1 to 4)    | 2 (1 to 4)    | 4.9% (-5.5% to 16.6%)     |
| Zimbabwe | Poisoning by carbon monoxide                    | 0 (0 to 0)    | 0 (0 to 0)    | -9.3% (-17.3% to 0.1%)    |
| Zimbabwe | Poisoning by other means                        | 0 (0 to 0)    | 0 (0 to 0)    | -5.5% (-12.2% to 1.1%)    |
| Zimbabwe | Pulmonary aspiration and foreign body in airway | 0 (0 to 0)    | 0 (0 to 0)    | 10.2% (1.9% to 19.6%)     |
| Zimbabwe | Self-harm by firearm                            | 0 (0 to 0)    | 0 (0 to 0)    | 15.6% (4.9% to 25.3%)     |
| Zimbabwe | Self-harm by other specified means              | 0 (0 to 0)    | 0 (0 to 0)    | 30.1% (22.4% to 38%)      |
| Zimbabwe | Unintentional firearm injuries                  | 0 (0 to 1)    | 0 (0 to 1)    | -4.5% (-12.4% to 4.4%)    |
| Zimbabwe | Venomous animal contact                         | 0 (0 to 1)    | 0 (0 to 1)    | 12.9% (5.1% to 22.4%)     |

Abbreviations: UI, uncertainty interval; NA, not applicable
