# Supplementary material for: Global, regional and national burden of traumatic brain injury and spinal cord injury, 1990–2019: a systematic analysis for the Global Burden of Disease Study 2019
Source: PubMed Central journal article supplement — BMJ Open. 2023 Oct 6;13(10):e075049. doi: 10.1136/bmjopen-2023-075049 (PMC10565269; doi:10.1136/bmjopen-2023-075049), 2023-10-06
Supplement: bmjopen-2023-075049supp022.pdf [file bmjopen-2023-075049supp022.pdf]

**eTable 15. Incidence for 1990 and 2019 and percentage changes of age-standardized rates by location and cause for spinal cord injury, 1990–2019**

| Location    | Cause                                           | Age-standardized                     | Age-                              | Percentage change of age-                  |
|-------------|-------------------------------------------------|--------------------------------------|-----------------------------------|--------------------------------------------|
|             |                                                 | rates per 100,000<br>(95% UI) (1990) | standardized<br>rates per 100,000 | standardized rates<br>(95% UI) (1990–2019) |
| Afghanistan | Adverse effects of medical treatment            | 0 (0 to 0)                           | 0 (0 to 0)                        | 0% (0% to 0%)                              |
| Afghanistan | Conflict and terrorism                          | 7 (2 to 21)                          | 40 (8 to 128)                     | NA                                         |
| Afghanistan | Cyclist road injuries                           | 0 (0 to 0)                           | 0 (0 to 0)                        | -6.2% (-14.7% to 2.5%)                     |
| Afghanistan | Drowning                                        | 0 (0 to 0)                           | 0 (0 to 0)                        | -20.4% (-25.9% to -13.6%)                  |
| Afghanistan | Environmental heat and cold exposure            | 0 (0 to 0)                           | 0 (0 to 0)                        | -0.9% (-5.2% to 4.8%)                      |
| Afghanistan | Executions and police conflict                  | 0 (0 to 0)                           | 0 (0 to 0)                        | NA                                         |
| Afghanistan | Exposure to forces of nature                    | 0 (0 to 0)                           | 0 (0 to 0)                        | NA                                         |
| Afghanistan | Falls                                           | 1 (1 to 1)                           | 1 (1 to 2)                        | 24.6% (20.1% to 29.1%)                     |
| Afghanistan | Fire, heat, and hot substances                  | 0 (0 to 0)                           | 0 (0 to 0)                        | -10.1% (-16.6% to -2%)                     |
| Afghanistan | Foreign body in eyes                            | 0 (0 to 0)                           | 0 (0 to 0)                        | 0% (0% to 0%)                              |
| Afghanistan | Foreign body in other body part                 | 0 (0 to 0)                           | 0 (0 to 0)                        | -2.2% (-5.7% to 1.4%)                      |
| Afghanistan | Motor vehicle road injuries                     | 0 (0 to 1)                           | 0 (0 to 1)                        | -19% (-25.6% to -12%)                      |
| Afghanistan | Motorcyclist road injuries                      | 0 (0 to 0)                           | 0 (0 to 0)                        | -8.9% (-18.5% to 0.9%)                     |
| Afghanistan | Non-venomous animal contact                     | 0 (0 to 0)                           | 0 (0 to 0)                        | -5.5% (-11.1% to -0.2%)                    |
| Afghanistan | Other exposure to mechanical forces             | 0 (0 to 1)                           | 0 (0 to 1)                        | -3.8% (-9.3% to 2.1%)                      |
| Afghanistan | Other road injuries                             | 0 (0 to 0)                           | 0 (0 to 0)                        | -3.9% (-14.2% to 6.9%)                     |
| Afghanistan | Other transport injuries                        | 0 (0 to 0)                           | 0 (0 to 0)                        | 4.7% (0.6% to 9.5%)                        |
| Afghanistan | Other unintentional injuries                    | 0 (0 to 0)                           | 0 (0 to 0)                        | -21.3% (-25.4% to -16.9%)                  |
| Afghanistan | Pedestrian road injuries                        | 0 (0 to 0)                           | 0 (0 to 0)                        | -19.8% (-26.9% to -12.1%)                  |
| Afghanistan | Physical violence by firearm                    | 0 (0 to 0)                           | 0 (0 to 0)                        | 21.9% (6% to 44.7%)                        |
| Afghanistan | Physical violence by other means                | 0 (0 to 1)                           | 0 (0 to 1)                        | 6.4% (-1.5% to 15.3%)                      |
| Afghanistan | Physical violence by sharp object               | 0 (0 to 0)                           | 0 (0 to 0)                        | -20.8% (-29.7% to -12.6%)                  |
| Afghanistan | Poisoning by carbon monoxide                    | 0 (0 to 0)                           | 0 (0 to 0)                        | 31.4% (17.9% to 46.6%)                     |
| Afghanistan | Poisoning by other means                        | 0 (0 to 0)                           | 0 (0 to 0)                        | -16.5% (-23.1% to -9.3%)                   |
| Afghanistan | Pulmonary aspiration and foreign body in airway | 0 (0 to 0)                           | 0 (0 to 0)                        | -20.2% (-28.9% to -11.3%)                  |
| Afghanistan | Self-harm by firearm                            | 0 (0 to 0)                           | 0 (0 to 0)                        | 13.2% (2.1% to 27.9%)                      |
| Afghanistan | Self-harm by other specified means              | 0 (0 to 0)                           | 0 (0 to 0)                        | -15.3% (-20.4% to -10.2%)                  |
| Afghanistan | Unintentional firearm injuries                  | 0 (0 to 0)                           | 0 (0 to 0)                        | -2.9% (-10.4% to 5.5%)                     |
| Afghanistan | Venomous animal contact                         | 0 (0 to 0)                           | 0 (0 to 0)                        | -2.3% (-8.8% to 6%)                        |
| Albania     | Adverse effects of medical treatment            | 0 (0 to 0)                           | 0 (0 to 0)                        | 0% (0% to 0%)                              |
| Albania     | Conflict and terrorism                          | 0 (0 to 0)                           | 0 (0 to 0)                        | NA                                         |
| Albania     | Cyclist road injuries                           | 1 (0 to 1)                           | 1 (0 to 1)                        | 9.4% (0.4% to 19.7%)                       |
| Albania     | Drowning                                        | 0 (0 to 0)                           | 0 (0 to 0)                        | 106.1% (80.9% to 132.1%)                   |
| Albania     | Environmental heat and cold exposure            | 0 (0 to 0)                           | 0 (0 to 0)                        | 3.7% (0% to 7.3%)                          |
| Albania     | Executions and police conflict                  | 0 (0 to 0)                           | 0 (0 to 0)                        | NA                                         |
| Albania     | Exposure to forces of nature                    | 0 (0 to 0)                           | 0 (0 to 0)                        | NA                                         |
| Albania     | Falls                                           | 3 (2 to 4)                           | 4 (3 to 6)                        | 54.7% (48.6% to 60.1%)                     |
| Albania     | Fire, heat, and hot substances                  | 0 (0 to 0)                           | 0 (0 to 0)                        | 1.6% (-3.8% to 6.6%)                       |
| Albania     | Foreign body in eyes                            | 0 (0 to 0)                           | 0 (0 to 0)                        | 0% (0% to 0%)                              |

|         |                                                 |            |            |                           |
|---------|-------------------------------------------------|------------|------------|---------------------------|
| Albania | Foreign body in other body part                 | 0 (0 to 0) | 0 (0 to 0) | -0.7% (-5.3% to 3.3%)     |
| Albania | Motor vehicle road injuries                     | 1 (1 to 2) | 1 (1 to 2) | 6.6% (-1.7% to 15.3%)     |
| Albania | Motorcyclist road injuries                      | 0 (0 to 0) | 0 (0 to 0) | 46% (29.3% to 66.5%)      |
| Albania | Non-venomous animal contact                     | 0 (0 to 0) | 0 (0 to 0) | -19.3% (-22.8% to -14.8%) |
| Albania | Other exposure to mechanical forces             | 3 (1 to 6) | 2 (1 to 4) | -32.8% (-37.5% to -26.7%) |
| Albania | Other road injuries                             | 0 (0 to 0) | 0 (0 to 0) | 6% (-3.7% to 17.1%)       |
| Albania | Other transport injuries                        | 0 (0 to 0) | 0 (0 to 0) | -10.6% (-15.5% to -6.3%)  |
| Albania | Other unintentional injuries                    | 1 (0 to 1) | 0 (0 to 0) | -35.4% (-40.9% to -30.3%) |
| Albania | Pedestrian road injuries                        | 0 (0 to 1) | 0 (0 to 1) | -4.8% (-14% to 5.2%)      |
| Albania | Physical violence by firearm                    | 0 (0 to 0) | 0 (0 to 0) | -44% (-53.7% to -32.9%)   |
| Albania | Physical violence by other means                | 1 (0 to 1) | 0 (0 to 1) | -46.5% (-53.7% to -39.3%) |
| Albania | Physical violence by sharp object               | 0 (0 to 0) | 0 (0 to 0) | -63.1% (-70% to -55.8%)   |
| Albania | Poisoning by carbon monoxide                    | 0 (0 to 0) | 0 (0 to 0) | 44.8% (33.4% to 59.6%)    |
| Albania | Poisoning by other means                        | 0 (0 to 0) | 0 (0 to 0) | -1.3% (-7.7% to 5.5%)     |
| Albania | Pulmonary aspiration and foreign body in airway | 0 (0 to 0) | 0 (0 to 0) | -15.2% (-21.6% to -8.9%)  |
| Albania | Self-harm by firearm                            | 0 (0 to 0) | 0 (0 to 0) | 68.3% (52% to 86.2%)      |
| Albania | Self-harm by other specified means              | 0 (0 to 0) | 0 (0 to 0) | 58% (46.9% to 69.4%)      |
| Albania | Unintentional firearm injuries                  | 0 (0 to 0) | 0 (0 to 0) | -57.4% (-64% to -50.9%)   |
| Albania | Venomous animal contact                         | 0 (0 to 0) | 0 (0 to 0) | -20.8% (-25.7% to -14.9%) |
| Algeria | Adverse effects of medical treatment            | 0 (0 to 0) | 0 (0 to 0) | 0% (0% to 0%)             |
| Algeria | Conflict and terrorism                          | 0 (0 to 0) | 0 (0 to 0) | NA                        |
| Algeria | Cyclist road injuries                           | 0 (0 to 0) | 0 (0 to 0) | -5.3% (-13.6% to 5.2%)    |
| Algeria | Drowning                                        | 0 (0 to 0) | 0 (0 to 0) | 65.7% (38.9% to 93.2%)    |
| Algeria | Environmental heat and cold exposure            | 0 (0 to 0) | 0 (0 to 0) | 2.5% (-1.6% to 7.1%)      |
| Algeria | Executions and police conflict                  | 0 (0 to 0) | 0 (0 to 0) | NA                        |
| Algeria | Exposure to forces of nature                    | 0 (0 to 0) | 0 (0 to 0) | NA                        |
| Algeria | Falls                                           | 2 (1 to 2) | 2 (2 to 3) | 21.2% (16.7% to 25.8%)    |
| Algeria | Fire, heat, and hot substances                  | 0 (0 to 0) | 0 (0 to 0) | -35.2% (-39.9% to -30.4%) |
| Algeria | Foreign body in eyes                            | 0 (0 to 0) | 0 (0 to 0) | 0% (0% to 0%)             |
| Algeria | Foreign body in other body part                 | 0 (0 to 0) | 0 (0 to 0) | 0.4% (-3.4% to 4.2%)      |
| Algeria | Motor vehicle road injuries                     | 1 (1 to 2) | 1 (0 to 1) | -32.3% (-37% to -26.8%)   |
| Algeria | Motorcyclist road injuries                      | 0 (0 to 0) | 0 (0 to 0) | -37.6% (-44.8% to -29.4%) |
| Algeria | Non-venomous animal contact                     | 0 (0 to 0) | 0 (0 to 0) | 2.9% (-1.2% to 8.1%)      |
| Algeria | Other exposure to mechanical forces             | 0 (0 to 1) | 0 (0 to 0) | -17.2% (-23.7% to -11.2%) |
| Algeria | Other road injuries                             | 0 (0 to 0) | 0 (0 to 0) | 1.4% (-8.3% to 13.4%)     |
| Algeria | Other transport injuries                        | 0 (0 to 0) | 0 (0 to 0) | -3.4% (-7.8% to 1.7%)     |
| Algeria | Other unintentional injuries                    | 0 (0 to 0) | 0 (0 to 0) | -16.7% (-22% to -11.7%)   |
| Algeria | Pedestrian road injuries                        | 0 (0 to 1) | 0 (0 to 0) | -39% (-44.6% to -32.3%)   |
| Algeria | Physical violence by firearm                    | 0 (0 to 0) | 0 (0 to 0) | 89% (66.4% to 119.4%)     |
| Algeria | Physical violence by other means                | 0 (0 to 0) | 0 (0 to 0) | -20% (-27.1% to -12.6%)   |
| Algeria | Physical violence by sharp object               | 0 (0 to 0) | 0 (0 to 0) | -31.8% (-41% to -23.6%)   |
| Algeria | Poisoning by carbon monoxide                    | 0 (0 to 0) | 0 (0 to 0) | 20.7% (6.4% to 37.5%)     |
| Algeria | Poisoning by other means                        | 0 (0 to 0) | 0 (0 to 0) | -27.8% (-35.7% to -19.5%) |

|                |                                                 |             |             |                           |
|----------------|-------------------------------------------------|-------------|-------------|---------------------------|
| Algeria        | Pulmonary aspiration and foreign body in airway | 0 (0 to 0)  | 0 (0 to 0)  | -10.2% (-18.6% to -2.9%)  |
| Algeria        | Self-harm by firearm                            | 0 (0 to 0)  | 0 (0 to 0)  | 10.8% (-0.5% to 24.1%)    |
| Algeria        | Self-harm by other specified means              | 0 (0 to 0)  | 0 (0 to 0)  | -22.6% (-27.4% to -17.7%) |
| Algeria        | Unintentional firearm injuries                  | 0 (0 to 0)  | 0 (0 to 0)  | 1.1% (-6% to 10.2%)       |
| Algeria        | Venomous animal contact                         | 0 (0 to 0)  | 0 (0 to 0)  | 4.7% (-1.1% to 12.1%)     |
| American Samoa | Adverse effects of medical treatment            | 0 (0 to 0)  | 0 (0 to 0)  | 0% (0% to 0%)             |
| American Samoa | Conflict and terrorism                          | 0 (0 to 0)  | 0 (0 to 0)  | NA                        |
| American Samoa | Cyclist road injuries                           | 0 (0 to 1)  | 0 (0 to 1)  | 2.9% (-4.3% to 11.7%)     |
| American Samoa | Drowning                                        | 0 (0 to 0)  | 0 (0 to 0)  | 13% (1.9% to 25.3%)       |
| American Samoa | Environmental heat and cold exposure            | 0 (0 to 0)  | 0 (0 to 0)  | -19.9% (-24.9% to -14.9%) |
| American Samoa | Executions and police conflict                  | 0 (0 to 0)  | 0 (0 to 0)  | NA                        |
| American Samoa | Exposure to forces of nature                    | 0 (0 to 0)  | 0 (0 to 0)  | NA                        |
| American Samoa | Falls                                           | 4 (3 to 6)  | 5 (4 to 8)  | 33.6% (28.3% to 39%)      |
| American Samoa | Fire, heat, and hot substances                  | 0 (0 to 0)  | 0 (0 to 0)  | 9.4% (3.9% to 15.3%)      |
| American Samoa | Foreign body in eyes                            | 0 (0 to 0)  | 0 (0 to 0)  | 0% (0% to 0%)             |
| American Samoa | Foreign body in other body part                 | 0 (0 to 0)  | 0 (0 to 0)  | -2.1% (-5.4% to 1%)       |
| American Samoa | Motor vehicle road injuries                     | 1 (0 to 2)  | 1 (0 to 1)  | -29.3% (-35.5% to -23.5%) |
| American Samoa | Motorcyclist road injuries                      | 1 (0 to 1)  | 1 (0 to 1)  | -6.8% (-14.5% to 2.4%)    |
| American Samoa | Non-venomous animal contact                     | 0 (0 to 0)  | 0 (0 to 0)  | 1.9% (-2.7% to 7%)        |
| American Samoa | Other exposure to mechanical forces             | 0 (0 to 1)  | 0 (0 to 0)  | -30.2% (-35.7% to -25.5%) |
| American Samoa | Other road injuries                             | 0 (0 to 0)  | 0 (0 to 0)  | -6.5% (-15.6% to 3.8%)    |
| American Samoa | Other transport injuries                        | 0 (0 to 1)  | 0 (0 to 1)  | -29.3% (-34.9% to -24.5%) |
| American Samoa | Other unintentional injuries                    | 0 (0 to 1)  | 0 (0 to 0)  | -17.2% (-21.8% to -12.6%) |
| American Samoa | Pedestrian road injuries                        | 1 (0 to 1)  | 0 (0 to 1)  | -15.9% (-23.1% to -8.3%)  |
| American Samoa | Physical violence by firearm                    | 0 (0 to 0)  | 0 (0 to 0)  | -26.5% (-40.6% to -11.2%) |
| American Samoa | Physical violence by other means                | 1 (0 to 2)  | 1 (0 to 1)  | -11.6% (-17.3% to -5.7%)  |
| American Samoa | Physical violence by sharp object               | 0 (0 to 0)  | 0 (0 to 0)  | -38.7% (-47.5% to -30.2%) |
| American Samoa | Poisoning by carbon monoxide                    | 0 (0 to 0)  | 0 (0 to 0)  | 5.8% (-3.4% to 16.2%)     |
| American Samoa | Poisoning by other means                        | 0 (0 to 0)  | 0 (0 to 0)  | -10.7% (-16.6% to -3.4%)  |
| American Samoa | Pulmonary aspiration and foreign body in airway | 0 (0 to 0)  | 0 (0 to 0)  | 17.5% (4.8% to 30.6%)     |
| American Samoa | Self-harm by firearm                            | 0 (0 to 0)  | 0 (0 to 0)  | -9.8% (-25.5% to 4%)      |
| American Samoa | Self-harm by other specified means              | 0 (0 to 0)  | 0 (0 to 0)  | 20.2% (12.6% to 30.2%)    |
| American Samoa | Unintentional firearm injuries                  | 0 (0 to 0)  | 0 (0 to 0)  | -39.1% (-48.7% to -30.9%) |
| American Samoa | Venomous animal contact                         | 0 (0 to 0)  | 0 (0 to 0)  | -7.4% (-15% to -0.1%)     |
| Andorra        | Adverse effects of medical treatment            | 0 (0 to 0)  | 0 (0 to 0)  | 0% (0% to 0%)             |
| Andorra        | Conflict and terrorism                          | 0 (0 to 0)  | 0 (0 to 0)  | NA                        |
| Andorra        | Cyclist road injuries                           | 0 (0 to 1)  | 0 (0 to 0)  | -14.1% (-20.9% to -6.3%)  |
| Andorra        | Drowning                                        | 0 (0 to 0)  | 0 (0 to 0)  | 65.1% (47.8% to 81.5%)    |
| Andorra        | Environmental heat and cold exposure            | 0 (0 to 0)  | 0 (0 to 0)  | 1.2% (-2.3% to 5.2%)      |
| Andorra        | Executions and police conflict                  | 0 (0 to 0)  | 0 (0 to 0)  | NA                        |
| Andorra        | Exposure to forces of nature                    | 0 (0 to 0)  | 0 (0 to 0)  | NA                        |
| Andorra        | Falls                                           | 7 (5 to 10) | 8 (6 to 11) | 8.1% (3.1% to 13%)        |
| Andorra        | Fire, heat, and hot substances                  | 0 (0 to 0)  | 0 (0 to 0)  | 0.6% (-3.8% to 4.8%)      |

|         |                                                 |              |            |                           |
|---------|-------------------------------------------------|--------------|------------|---------------------------|
| Andorra | Foreign body in eyes                            | 0 (0 to 0)   | 0 (0 to 0) | 0% (0% to 0%)             |
| Andorra | Foreign body in other body part                 | 0 (0 to 0)   | 0 (0 to 0) | -0.4% (-4.1% to 3.6%)     |
| Andorra | Motor vehicle road injuries                     | 1 (0 to 1)   | 0 (0 to 1) | -22.6% (-28.8% to -16.2%) |
| Andorra | Motorcyclist road injuries                      | 0 (0 to 0)   | 0 (0 to 0) | -6.5% (-16.3% to 4.1%)    |
| Andorra | Non-venomous animal contact                     | 0 (0 to 0)   | 0 (0 to 0) | -6.1% (-9.9% to -2.7%)    |
| Andorra | Other exposure to mechanical forces             | 0 (0 to 1)   | 0 (0 to 1) | 1.9% (-3% to 6.9%)        |
| Andorra | Other road injuries                             | 0 (0 to 0)   | 0 (0 to 0) | -9.1% (-17.1% to 0.2%)    |
| Andorra | Other transport injuries                        | 0 (0 to 0)   | 0 (0 to 0) | 1.1% (-2.9% to 5%)        |
| Andorra | Other unintentional injuries                    | 0 (0 to 0)   | 0 (0 to 0) | -2.2% (-5.7% to 1.3%)     |
| Andorra | Pedestrian road injuries                        | 0 (0 to 0)   | 0 (0 to 0) | -22.8% (-31.3% to -13.8%) |
| Andorra | Physical violence by firearm                    | 0 (0 to 0)   | 0 (0 to 0) | 26% (14.7% to 39.6%)      |
| Andorra | Physical violence by other means                | 0 (0 to 0)   | 0 (0 to 0) | -8.8% (-16.2% to -2%)     |
| Andorra | Physical violence by sharp object               | 0 (0 to 0)   | 0 (0 to 0) | -13.1% (-22.5% to -4.3%)  |
| Andorra | Poisoning by carbon monoxide                    | 0 (0 to 0)   | 0 (0 to 0) | 12.5% (5.4% to 20.2%)     |
| Andorra | Poisoning by other means                        | 0 (0 to 0)   | 0 (0 to 0) | -4.3% (-9.6% to 1.2%)     |
| Andorra | Pulmonary aspiration and foreign body in airway | 0 (0 to 0)   | 0 (0 to 0) | -10.6% (-18.3% to -3.1%)  |
| Andorra | Self-harm by firearm                            | 0 (0 to 0)   | 0 (0 to 0) | -8.2% (-17.6% to 1.3%)    |
| Andorra | Self-harm by other specified means              | 0 (0 to 0)   | 0 (0 to 0) | -15% (-18.9% to -11.4%)   |
| Andorra | Unintentional firearm injuries                  | 0 (0 to 0)   | 0 (0 to 0) | 6% (-1.3% to 13.3%)       |
| Andorra | Venomous animal contact                         | 0 (0 to 0)   | 0 (0 to 0) | -8.2% (-13.9% to -2.8%)   |
| Angola  | Adverse effects of medical treatment            | 0 (0 to 0)   | 0 (0 to 0) | 0% (0% to 0%)             |
| Angola  | Conflict and terrorism                          | 14 (3 to 42) | 0 (0 to 0) | NA                        |
| Angola  | Cyclist road injuries                           | 0 (0 to 0)   | 0 (0 to 0) | 27.2% (16.2% to 37.8%)    |
| Angola  | Drowning                                        | 0 (0 to 0)   | 0 (0 to 0) | -27.9% (-35.8% to -20.3%) |
| Angola  | Environmental heat and cold exposure            | 0 (0 to 0)   | 0 (0 to 0) | -10.6% (-18% to -3.9%)    |
| Angola  | Executions and police conflict                  | 0 (0 to 0)   | 0 (0 to 0) | NA                        |
| Angola  | Exposure to forces of nature                    | 0 (0 to 0)   | 0 (0 to 0) | NA                        |
| Angola  | Falls                                           | 1 (1 to 1)   | 1 (1 to 2) | 27.2% (22.7% to 31.5%)    |
| Angola  | Fire, heat, and hot substances                  | 0 (0 to 0)   | 0 (0 to 0) | -19.9% (-25.9% to -14.8%) |
| Angola  | Foreign body in eyes                            | 0 (0 to 0)   | 0 (0 to 0) | 0% (0% to 0%)             |
| Angola  | Foreign body in other body part                 | 0 (0 to 1)   | 0 (0 to 1) | -12.1% (-16% to -8.2%)    |
| Angola  | Motor vehicle road injuries                     | 1 (0 to 1)   | 1 (0 to 1) | 5.8% (-1.7% to 14.1%)     |
| Angola  | Motorcyclist road injuries                      | 0 (0 to 0)   | 0 (0 to 0) | 3.6% (-8.2% to 15.2%)     |
| Angola  | Non-venomous animal contact                     | 0 (0 to 0)   | 0 (0 to 0) | -33.6% (-38% to -29.3%)   |
| Angola  | Other exposure to mechanical forces             | 0 (0 to 0)   | 0 (0 to 0) | -17.4% (-24.1% to -10.9%) |
| Angola  | Other road injuries                             | 0 (0 to 0)   | 0 (0 to 0) | 18.9% (7.4% to 31.6%)     |
| Angola  | Other transport injuries                        | 0 (0 to 0)   | 0 (0 to 0) | -20.1% (-25.4% to -15.4%) |
| Angola  | Other unintentional injuries                    | 0 (0 to 0)   | 0 (0 to 0) | -21.9% (-27.1% to -15.9%) |
| Angola  | Pedestrian road injuries                        | 1 (0 to 1)   | 0 (0 to 1) | -16.9% (-23.8% to -10.8%) |
| Angola  | Physical violence by firearm                    | 0 (0 to 0)   | 0 (0 to 0) | 20.7% (8.8% to 35.2%)     |
| Angola  | Physical violence by other means                | 0 (0 to 0)   | 0 (0 to 0) | -8.2% (-15% to -1.5%)     |
| Angola  | Physical violence by sharp object               | 0 (0 to 0)   | 0 (0 to 0) | -10.2% (-16.8% to -3.7%)  |
| Angola  | Poisoning by carbon monoxide                    | 0 (0 to 0)   | 0 (0 to 0) | 5.6% (-6.5% to 20.3%)     |

|                     |                                                 |            |            |                           |
|---------------------|-------------------------------------------------|------------|------------|---------------------------|
| Angola              | Poisoning by other means                        | 0 (0 to 0) | 0 (0 to 0) | -33.3% (-39.8% to -25.5%) |
| Angola              | Pulmonary aspiration and foreign body in airway | 0 (0 to 0) | 0 (0 to 0) | -37.4% (-45.3% to -28.8%) |
| Angola              | Self-harm by firearm                            | 0 (0 to 0) | 0 (0 to 0) | 28.4% (12.9% to 46.5%)    |
| Angola              | Self-harm by other specified means              | 0 (0 to 0) | 0 (0 to 0) | -5.6% (-10.9% to -0.5%)   |
| Angola              | Unintentional firearm injuries                  | 0 (0 to 0) | 0 (0 to 0) | -25% (-32.1% to -17.9%)   |
| Angola              | Venomous animal contact                         | 0 (0 to 0) | 0 (0 to 0) | -22.6% (-31.1% to -12.4%) |
| Antigua and Barbuda | Adverse effects of medical treatment            | 0 (0 to 0) | 0 (0 to 0) | 0% (0% to 0%)             |
| Antigua and Barbuda | Conflict and terrorism                          | 0 (0 to 0) | 0 (0 to 0) | NA                        |
| Antigua and Barbuda | Cyclist road injuries                           | 0 (0 to 0) | 0 (0 to 0) | -7.9% (-16.7% to 1.8%)    |
| Antigua and Barbuda | Drowning                                        | 0 (0 to 0) | 0 (0 to 0) | 24.7% (12% to 37.7%)      |
| Antigua and Barbuda | Environmental heat and cold exposure            | 0 (0 to 1) | 0 (0 to 1) | 8.9% (4.2% to 13%)        |
| Antigua and Barbuda | Executions and police conflict                  | 0 (0 to 0) | 0 (0 to 0) | NA                        |
| Antigua and Barbuda | Exposure to forces of nature                    | 0 (0 to 0) | 0 (0 to 0) | NA                        |
| Antigua and Barbuda | Falls                                           | 1 (1 to 1) | 1 (1 to 2) | 52.3% (46.3% to 58.1%)    |
| Antigua and Barbuda | Fire, heat, and hot substances                  | 0 (0 to 0) | 0 (0 to 0) | -18.8% (-23.8% to -13.9%) |
| Antigua and Barbuda | Foreign body in eyes                            | 0 (0 to 0) | 0 (0 to 0) | 0% (0% to 0%)             |
| Antigua and Barbuda | Foreign body in other body part                 | 0 (0 to 0) | 0 (0 to 0) | 3% (-1.5% to 7.6%)        |
| Antigua and Barbuda | Motor vehicle road injuries                     | 0 (0 to 1) | 0 (0 to 1) | -24.9% (-31.8% to -17.3%) |
| Antigua and Barbuda | Motorcyclist road injuries                      | 0 (0 to 0) | 0 (0 to 0) | 6.8% (-5.5% to 22.3%)     |
| Antigua and Barbuda | Non-venomous animal contact                     | 0 (0 to 0) | 0 (0 to 0) | 12.5% (3.8% to 23.2%)     |
| Antigua and Barbuda | Other exposure to mechanical forces             | 1 (0 to 1) | 1 (0 to 1) | 10.5% (1.1% to 19.5%)     |
| Antigua and Barbuda | Other road injuries                             | 0 (0 to 0) | 0 (0 to 0) | -3% (-12.5% to 7.8%)      |
| Antigua and Barbuda | Other transport injuries                        | 0 (0 to 0) | 0 (0 to 0) | 7.7% (3.2% to 13.1%)      |
| Antigua and Barbuda | Other unintentional injuries                    | 0 (0 to 0) | 0 (0 to 0) | -14% (-18.9% to -9.7%)    |
| Antigua and Barbuda | Pedestrian road injuries                        | 0 (0 to 0) | 0 (0 to 0) | -12.2% (-20.9% to -3%)    |
| Antigua and Barbuda | Physical violence by firearm                    | 0 (0 to 0) | 0 (0 to 0) | 63.1% (41.5% to 93.3%)    |
| Antigua and Barbuda | Physical violence by other means                | 0 (0 to 0) | 0 (0 to 0) | -4.8% (-14.1% to 4.1%)    |
| Antigua and Barbuda | Physical violence by sharp object               | 0 (0 to 0) | 0 (0 to 0) | 0.2% (-10.2% to 11.9%)    |
| Antigua and Barbuda | Poisoning by carbon monoxide                    | 0 (0 to 0) | 0 (0 to 0) | 10.7% (-2.6% to 25.4%)    |
| Antigua and Barbuda | Poisoning by other means                        | 0 (0 to 0) | 0 (0 to 0) | -20.2% (-29.7% to -11%)   |
| Antigua and Barbuda | Pulmonary aspiration and foreign body in airway | 0 (0 to 0) | 0 (0 to 0) | -18.9% (-25.1% to -11.8%) |
| Antigua and Barbuda | Self-harm by firearm                            | 0 (0 to 0) | 0 (0 to 0) | 29.9% (17.8% to 45.5%)    |
| Antigua and Barbuda | Self-harm by other specified means              | 0 (0 to 0) | 0 (0 to 0) | 20.7% (12.3% to 29.9%)    |
| Antigua and Barbuda | Unintentional firearm injuries                  | 0 (0 to 1) | 1 (0 to 1) | 13.4% (3.3% to 25.5%)     |
| Antigua and Barbuda | Venomous animal contact                         | 0 (0 to 0) | 0 (0 to 0) | 10.4% (1.7% to 20.9%)     |
| Argentina           | Adverse effects of medical treatment            | 0 (0 to 0) | 0 (0 to 0) | 0% (0% to 0%)             |
| Argentina           | Conflict and terrorism                          | 0 (0 to 1) | 0 (0 to 0) | NA                        |
| Argentina           | Cyclist road injuries                           | 0 (0 to 0) | 0 (0 to 0) | -3.7% (-13.9% to 8.2%)    |
| Argentina           | Drowning                                        | 0 (0 to 0) | 0 (0 to 0) | 32.9% (16.3% to 49.7%)    |
| Argentina           | Environmental heat and cold exposure            | 0 (0 to 0) | 0 (0 to 0) | 1.2% (-4% to 7%)          |
| Argentina           | Executions and police conflict                  | 0 (0 to 0) | 0 (0 to 0) | NA                        |
| Argentina           | Exposure to forces of nature                    | 0 (0 to 0) | 0 (0 to 0) | NA                        |
| Argentina           | Falls                                           | 3 (2 to 4) | 3 (2 to 4) | 1.7% (-3.4% to 6.4%)      |

|           |                                                 |            |            |                           |
|-----------|-------------------------------------------------|------------|------------|---------------------------|
| Argentina | Fire, heat, and hot substances                  | 0 (0 to 0) | 0 (0 to 0) | -2.4% (-8% to 3.3%)       |
| Argentina | Foreign body in eyes                            | 0 (0 to 0) | 0 (0 to 0) | 0% (0% to 0%)             |
| Argentina | Foreign body in other body part                 | 0 (0 to 1) | 0 (0 to 0) | -6.4% (-10.4% to -3.4%)   |
| Argentina | Motor vehicle road injuries                     | 1 (0 to 1) | 1 (0 to 1) | 15.5% (5.1% to 29.5%)     |
| Argentina | Motorcyclist road injuries                      | 0 (0 to 0) | 0 (0 to 0) | 97.6% (67.3% to 142.2%)   |
| Argentina | Non-venomous animal contact                     | 0 (0 to 0) | 0 (0 to 0) | -18.2% (-21.1% to -15%)   |
| Argentina | Other exposure to mechanical forces             | 1 (0 to 1) | 1 (0 to 2) | 9.2% (0.4% to 20.8%)      |
| Argentina | Other road injuries                             | 0 (0 to 0) | 0 (0 to 0) | -2.7% (-12.2% to 8.4%)    |
| Argentina | Other transport injuries                        | 0 (0 to 0) | 0 (0 to 0) | -27.9% (-33.3% to -22.4%) |
| Argentina | Other unintentional injuries                    | 0 (0 to 1) | 0 (0 to 1) | -12.1% (-17% to -6.2%)    |
| Argentina | Pedestrian road injuries                        | 0 (0 to 0) | 0 (0 to 0) | -16.5% (-26.1% to -7.1%)  |
| Argentina | Physical violence by firearm                    | 0 (0 to 0) | 0 (0 to 0) | 64.3% (43.3% to 91%)      |
| Argentina | Physical violence by other means                | 0 (0 to 1) | 0 (0 to 1) | 1.4% (-10.2% to 14.4%)    |
| Argentina | Physical violence by sharp object               | 0 (0 to 0) | 0 (0 to 0) | 8.6% (-6.5% to 26.1%)     |
| Argentina | Poisoning by carbon monoxide                    | 0 (0 to 0) | 0 (0 to 0) | 49.1% (34.9% to 64.9%)    |
| Argentina | Poisoning by other means                        | 0 (0 to 0) | 0 (0 to 0) | -5.5% (-12.8% to 2.7%)    |
| Argentina | Pulmonary aspiration and foreign body in airway | 0 (0 to 0) | 0 (0 to 0) | -41.3% (-48.4% to -34.3%) |
| Argentina | Self-harm by firearm                            | 0 (0 to 0) | 0 (0 to 0) | 2.5% (-12.1% to 18.1%)    |
| Argentina | Self-harm by other specified means              | 0 (0 to 0) | 0 (0 to 0) | 55.8% (44.7% to 68.4%)    |
| Argentina | Unintentional firearm injuries                  | 0 (0 to 1) | 0 (0 to 1) | -32.4% (-42.2% to -23.1%) |
| Argentina | Venomous animal contact                         | 0 (0 to 0) | 0 (0 to 0) | -17.9% (-22.4% to -13.1%) |
| Armenia   | Adverse effects of medical treatment            | 0 (0 to 0) | 0 (0 to 0) | 0% (0% to 0%)             |
| Armenia   | Conflict and terrorism                          | 0 (0 to 1) | 0 (0 to 0) | NA                        |
| Armenia   | Cyclist road injuries                           | 0 (0 to 0) | 0 (0 to 0) | -16.8% (-24.9% to -7.4%)  |
| Armenia   | Drowning                                        | 0 (0 to 0) | 0 (0 to 0) | 13.9% (-2.4% to 30.2%)    |
| Armenia   | Environmental heat and cold exposure            | 0 (0 to 0) | 0 (0 to 0) | 1.5% (-7% to 12.4%)       |
| Armenia   | Executions and police conflict                  | 0 (0 to 0) | 0 (0 to 0) | NA                        |
| Armenia   | Exposure to forces of nature                    | 0 (0 to 0) | 0 (0 to 0) | NA                        |
| Armenia   | Falls                                           | 4 (3 to 5) | 3 (2 to 3) | -33.9% (-39.3% to -27.9%) |
| Armenia   | Fire, heat, and hot substances                  | 0 (0 to 0) | 0 (0 to 0) | -37.5% (-46% to -28.9%)   |
| Armenia   | Foreign body in eyes                            | 0 (0 to 0) | 0 (0 to 0) | 0% (0% to 0%)             |
| Armenia   | Foreign body in other body part                 | 0 (0 to 1) | 0 (0 to 1) | -10% (-14.5% to -5.3%)    |
| Armenia   | Motor vehicle road injuries                     | 1 (0 to 2) | 1 (0 to 1) | -18.3% (-26.6% to -9.1%)  |
| Armenia   | Motorcyclist road injuries                      | 0 (0 to 0) | 0 (0 to 0) | -42.4% (-52.5% to -31.6%) |
| Armenia   | Non-venomous animal contact                     | 0 (0 to 0) | 0 (0 to 0) | -4.9% (-9.8% to 0.6%)     |
| Armenia   | Other exposure to mechanical forces             | 1 (0 to 2) | 1 (0 to 1) | -25.2% (-33.1% to -17.1%) |
| Armenia   | Other road injuries                             | 0 (0 to 0) | 0 (0 to 0) | -21.5% (-30.8% to -10.9%) |
| Armenia   | Other transport injuries                        | 0 (0 to 0) | 0 (0 to 0) | 9.3% (5.4% to 13.9%)      |
| Armenia   | Other unintentional injuries                    | 0 (0 to 1) | 0 (0 to 0) | -29.7% (-35.6% to -22.8%) |
| Armenia   | Pedestrian road injuries                        | 0 (0 to 1) | 0 (0 to 0) | -32.8% (-40% to -24.5%)   |
| Armenia   | Physical violence by firearm                    | 0 (0 to 0) | 0 (0 to 0) | 40.2% (20.5% to 63.6%)    |
| Armenia   | Physical violence by other means                | 0 (0 to 1) | 0 (0 to 0) | -17.6% (-27% to -7%)      |
| Armenia   | Physical violence by sharp object               | 0 (0 to 0) | 0 (0 to 0) | -19.7% (-31.9% to -6.8%)  |



|           |                                                 |            |             |                           |
|-----------|-------------------------------------------------|------------|-------------|---------------------------|
| Armenia   | Poisoning by carbon monoxide                    | 0 (0 to 0) | 0 (0 to 0)  | -8.2% (-21.7% to 5.6%)    |
| Armenia   | Poisoning by other means                        | 0 (0 to 0) | 0 (0 to 0)  | -14.4% (-24.1% to -5.5%)  |
| Armenia   | Pulmonary aspiration and foreign body in airway | 0 (0 to 0) | 0 (0 to 0)  | -30.5% (-37.9% to -24.3%) |
| Armenia   | Self-harm by firearm                            | 0 (0 to 0) | 0 (0 to 0)  | 131.5% (96.6% to 171.8%)  |
| Armenia   | Self-harm by other specified means              | 0 (0 to 0) | 0 (0 to 0)  | 84.1% (71.1% to 99.8%)    |
| Armenia   | Unintentional firearm injuries                  | 0 (0 to 0) | 0 (0 to 0)  | -46.4% (-55.6% to -37.7%) |
| Armenia   | Venomous animal contact                         | 0 (0 to 0) | 0 (0 to 0)  | -17.8% (-24.1% to -13.1%) |
| Australia | Adverse effects of medical treatment            | 0 (0 to 0) | 0 (0 to 0)  | 0% (0% to 0%)             |
| Australia | Conflict and terrorism                          | 0 (0 to 0) | 0 (0 to 0)  | NA                        |
| Australia | Cyclist road injuries                           | 0 (0 to 0) | 0 (0 to 0)  | -15% (-26% to -2.3%)      |
| Australia | Drowning                                        | 0 (0 to 0) | 0 (0 to 0)  | 36.3% (23.6% to 50.6%)    |
| Australia | Environmental heat and cold exposure            | 0 (0 to 0) | 0 (0 to 0)  | -18.2% (-24.3% to -12.6%) |
| Australia | Executions and police conflict                  | 0 (0 to 0) | 0 (0 to 0)  | NA                        |
| Australia | Exposure to forces of nature                    | 0 (0 to 0) | 0 (0 to 0)  | NA                        |
| Australia | Falls                                           | 6 (4 to 8) | 8 (6 to 11) | 33.2% (27.2% to 39.8%)    |
| Australia | Fire, heat, and hot substances                  | 0 (0 to 0) | 0 (0 to 0)  | -6.7% (-11.9% to -1%)     |
| Australia | Foreign body in eyes                            | 0 (0 to 0) | 0 (0 to 0)  | 0% (0% to 0%)             |
| Australia | Foreign body in other body part                 | 1 (0 to 1) | 1 (0 to 1)  | 1.6% (-2.5% to 5.7%)      |
| Australia | Motor vehicle road injuries                     | 1 (0 to 1) | 0 (0 to 1)  | -36.5% (-43.4% to -28.9%) |
| Australia | Motorcyclist road injuries                      | 0 (0 to 0) | 0 (0 to 0)  | -15% (-31.9% to 2.3%)     |
| Australia | Non-venomous animal contact                     | 0 (0 to 1) | 0 (0 to 1)  | -13% (-16.2% to -9.5%)    |
| Australia | Other exposure to mechanical forces             | 2 (1 to 4) | 2 (1 to 4)  | -7.7% (-14.9% to -1.9%)   |
| Australia | Other road injuries                             | 0 (0 to 0) | 0 (0 to 0)  | -3.4% (-15.4% to 11.2%)   |
| Australia | Other transport injuries                        | 0 (0 to 0) | 0 (0 to 0)  | -13.2% (-18.8% to -7.9%)  |
| Australia | Other unintentional injuries                    | 1 (0 to 1) | 1 (0 to 1)  | -11.6% (-16.8% to -7%)    |
| Australia | Pedestrian road injuries                        | 0 (0 to 0) | 0 (0 to 0)  | -34.8% (-44.7% to -23.9%) |
| Australia | Physical violence by firearm                    | 0 (0 to 0) | 0 (0 to 0)  | 24.1% (13% to 37.6%)      |
| Australia | Physical violence by other means                | 1 (0 to 1) | 1 (0 to 1)  | -6.3% (-13.4% to 0.9%)    |
| Australia | Physical violence by sharp object               | 0 (0 to 0) | 0 (0 to 0)  | -18.9% (-28.1% to -9.9%)  |
| Australia | Poisoning by carbon monoxide                    | 0 (0 to 0) | 0 (0 to 0)  | 9.4% (1.5% to 17.4%)      |
| Australia | Poisoning by other means                        | 0 (0 to 0) | 0 (0 to 0)  | -1.8% (-8.5% to 4.4%)     |
| Australia | Pulmonary aspiration and foreign body in airway | 0 (0 to 0) | 0 (0 to 0)  | -8.2% (-12.5% to -3.5%)   |
| Australia | Self-harm by firearm                            | 0 (0 to 0) | 0 (0 to 0)  | -43.8% (-57.2% to -32.3%) |
| Australia | Self-harm by other specified means              | 0 (0 to 1) | 0 (0 to 1)  | 1.7% (-4% to 7.7%)        |
| Australia | Unintentional firearm injuries                  | 0 (0 to 0) | 0 (0 to 0)  | -8.9% (-19.6% to 1.9%)    |
| Australia | Venomous animal contact                         | 0 (0 to 0) | 0 (0 to 0)  | -15.8% (-20.9% to -10.9%) |
| Austria   | Adverse effects of medical treatment            | 0 (0 to 0) | 0 (0 to 0)  | 0% (0% to 0%)             |
| Austria   | Conflict and terrorism                          | 0 (0 to 0) | 0 (0 to 0)  | NA                        |
| Austria   | Cyclist road injuries                           | 0 (0 to 0) | 0 (0 to 0)  | -27.5% (-36.4% to -16.7%) |
| Austria   | Drowning                                        | 0 (0 to 0) | 0 (0 to 0)  | 39.9% (24.2% to 55.1%)    |
| Austria   | Environmental heat and cold exposure            | 0 (0 to 0) | 0 (0 to 0)  | 4.2% (-0.9% to 9.7%)      |
| Austria   | Executions and police conflict                  | 0 (0 to 0) | 0 (0 to 0)  | NA                        |
| Austria   | Exposure to forces of nature                    | 0 (0 to 0) | 0 (0 to 0)  | NA                        |

|            |                                                 |             |            |                           |
|------------|-------------------------------------------------|-------------|------------|---------------------------|
| Austria    | Falls                                           | 7 (5 to 10) | 7 (5 to 9) | -3.3% (-7.9% to 1.3%)     |
| Austria    | Fire, heat, and hot substances                  | 0 (0 to 0)  | 0 (0 to 0) | -6% (-11.2% to -0.5%)     |
| Austria    | Foreign body in eyes                            | 0 (0 to 0)  | 0 (0 to 0) | 0% (0% to 0%)             |
| Austria    | Foreign body in other body part                 | 0 (0 to 0)  | 0 (0 to 0) | 2.3% (-1.1% to 5.6%)      |
| Austria    | Motor vehicle road injuries                     | 1 (0 to 1)  | 0 (0 to 1) | -54.7% (-61.5% to -47.6%) |
| Austria    | Motorcyclist road injuries                      | 0 (0 to 0)  | 0 (0 to 0) | -28.7% (-41.5% to -13.2%) |
| Austria    | Non-venomous animal contact                     | 0 (0 to 0)  | 0 (0 to 0) | -12.8% (-16.7% to -8.3%)  |
| Austria    | Other exposure to mechanical forces             | 1 (0 to 1)  | 1 (0 to 1) | -33.3% (-40.7% to -26.4%) |
| Austria    | Other road injuries                             | 0 (0 to 0)  | 0 (0 to 0) | -14.4% (-26.2% to -0.5%)  |
| Austria    | Other transport injuries                        | 0 (0 to 0)  | 0 (0 to 0) | -6.3% (-11.4% to -1%)     |
| Austria    | Other unintentional injuries                    | 0 (0 to 0)  | 0 (0 to 0) | -4.3% (-9.2% to 0%)       |
| Austria    | Pedestrian road injuries                        | 0 (0 to 0)  | 0 (0 to 0) | -49.2% (-58.2% to -39.3%) |
| Austria    | Physical violence by firearm                    | 0 (0 to 0)  | 0 (0 to 0) | 33% (22.2% to 47.3%)      |
| Austria    | Physical violence by other means                | 0 (0 to 0)  | 0 (0 to 0) | 0.5% (-7.2% to 8.1%)      |
| Austria    | Physical violence by sharp object               | 0 (0 to 0)  | 0 (0 to 0) | -19.1% (-27.7% to -11.2%) |
| Austria    | Poisoning by carbon monoxide                    | 0 (0 to 0)  | 0 (0 to 0) | 13.3% (5.8% to 21.9%)     |
| Austria    | Poisoning by other means                        | 0 (0 to 0)  | 0 (0 to 0) | -3.6% (-9% to 2.6%)       |
| Austria    | Pulmonary aspiration and foreign body in airway | 0 (0 to 0)  | 0 (0 to 0) | -6.8% (-14.3% to 1.4%)    |
| Austria    | Self-harm by firearm                            | 0 (0 to 0)  | 0 (0 to 0) | -28.6% (-38.5% to -16.9%) |
| Austria    | Self-harm by other specified means              | 0 (0 to 1)  | 0 (0 to 1) | -34.8% (-38.2% to -31%)   |
| Austria    | Unintentional firearm injuries                  | 0 (0 to 0)  | 0 (0 to 0) | 3.7% (-6.5% to 15.4%)     |
| Austria    | Venomous animal contact                         | 0 (0 to 0)  | 0 (0 to 0) | -11.5% (-16.9% to -4.6%)  |
| Azerbaijan | Adverse effects of medical treatment            | 0 (0 to 0)  | 0 (0 to 0) | 0% (0% to 0%)             |
| Azerbaijan | Conflict and terrorism                          | 0 (0 to 1)  | 0 (0 to 0) | NA                        |
| Azerbaijan | Cyclist road injuries                           | 0 (0 to 0)  | 0 (0 to 0) | -6.9% (-16.6% to 3.8%)    |
| Azerbaijan | Drowning                                        | 0 (0 to 0)  | 0 (0 to 0) | 30% (13.7% to 47.3%)      |
| Azerbaijan | Environmental heat and cold exposure            | 0 (0 to 0)  | 0 (0 to 0) | -9.8% (-15.8% to -3.1%)   |
| Azerbaijan | Executions and police conflict                  | 0 (0 to 0)  | 0 (0 to 0) | NA                        |
| Azerbaijan | Exposure to forces of nature                    | 0 (0 to 0)  | 0 (0 to 0) | NA                        |
| Azerbaijan | Falls                                           | 2 (2 to 3)  | 2 (2 to 3) | 8.8% (3.3% to 14.4%)      |
| Azerbaijan | Fire, heat, and hot substances                  | 0 (0 to 0)  | 0 (0 to 0) | -19.7% (-25.2% to -14.2%) |
| Azerbaijan | Foreign body in eyes                            | 0 (0 to 0)  | 0 (0 to 0) | 0% (0% to 0%)             |
| Azerbaijan | Foreign body in other body part                 | 0 (0 to 0)  | 0 (0 to 0) | 1.3% (-3.4% to 6.6%)      |
| Azerbaijan | Motor vehicle road injuries                     | 1 (0 to 2)  | 1 (0 to 1) | -23.1% (-31.1% to -15.2%) |
| Azerbaijan | Motorcyclist road injuries                      | 0 (0 to 0)  | 0 (0 to 0) | -46.2% (-54.1% to -37.4%) |
| Azerbaijan | Non-venomous animal contact                     | 0 (0 to 0)  | 0 (0 to 0) | -9.6% (-13.4% to -5.4%)   |
| Azerbaijan | Other exposure to mechanical forces             | 1 (0 to 1)  | 1 (0 to 1) | 0.1% (-5.8% to 6.8%)      |
| Azerbaijan | Other road injuries                             | 0 (0 to 0)  | 0 (0 to 0) | 0.8% (-10.4% to 13.4%)    |
| Azerbaijan | Other transport injuries                        | 0 (0 to 0)  | 0 (0 to 0) | 10.4% (6% to 15.7%)       |
| Azerbaijan | Other unintentional injuries                    | 0 (0 to 0)  | 0 (0 to 0) | 2% (-3% to 6.5%)          |
| Azerbaijan | Pedestrian road injuries                        | 0 (0 to 0)  | 0 (0 to 0) | -20% (-29% to -10.4%)     |
| Azerbaijan | Physical violence by firearm                    | 0 (0 to 0)  | 0 (0 to 0) | -26% (-42.1% to -6.6%)    |
| Azerbaijan | Physical violence by other means                | 0 (0 to 1)  | 0 (0 to 0) | -54.8% (-61% to -47.8%)   |



|            |                                                 |            |            |                           |
|------------|-------------------------------------------------|------------|------------|---------------------------|
| Azerbaijan | Physical violence by sharp object               | 0 (0 to 0) | 0 (0 to 0) | -55.2% (-62.5% to -47%)   |
| Azerbaijan | Poisoning by carbon monoxide                    | 0 (0 to 0) | 0 (0 to 0) | 22.1% (9.6% to 35.8%)     |
| Azerbaijan | Poisoning by other means                        | 0 (0 to 0) | 0 (0 to 0) | -5.4% (-14.2% to 3%)      |
| Azerbaijan | Pulmonary aspiration and foreign body in airway | 0 (0 to 0) | 0 (0 to 0) | -10.8% (-17.5% to -3.6%)  |
| Azerbaijan | Self-harm by firearm                            | 0 (0 to 0) | 0 (0 to 0) | 34.4% (19.7% to 51.3%)    |
| Azerbaijan | Self-harm by other specified means              | 0 (0 to 0) | 0 (0 to 0) | 24% (17.5% to 31.3%)      |
| Azerbaijan | Unintentional firearm injuries                  | 0 (0 to 0) | 0 (0 to 0) | 3% (-5.3% to 11.4%)       |
| Azerbaijan | Venomous animal contact                         | 0 (0 to 0) | 0 (0 to 0) | -9.2% (-14.3% to -3.5%)   |
| Bahamas    | Adverse effects of medical treatment            | 0 (0 to 0) | 0 (0 to 0) | 0% (0% to 0%)             |
| Bahamas    | Conflict and terrorism                          | 0 (0 to 0) | 0 (0 to 0) | NA                        |
| Bahamas    | Cyclist road injuries                           | 0 (0 to 1) | 0 (0 to 0) | -25.2% (-33.7% to -16%)   |
| Bahamas    | Drowning                                        | 0 (0 to 0) | 0 (0 to 0) | 17.6% (6.2% to 29.1%)     |
| Bahamas    | Environmental heat and cold exposure            | 0 (0 to 0) | 0 (0 to 0) | 0.5% (-4.1% to 4.3%)      |
| Bahamas    | Executions and police conflict                  | 0 (0 to 0) | 0 (0 to 0) | NA                        |
| Bahamas    | Exposure to forces of nature                    | 0 (0 to 0) | 0 (0 to 0) | NA                        |
| Bahamas    | Falls                                           | 1 (1 to 2) | 2 (1 to 2) | 36.9% (31.7% to 42.4%)    |
| Bahamas    | Fire, heat, and hot substances                  | 0 (0 to 0) | 0 (0 to 0) | -19% (-23.6% to -13.6%)   |
| Bahamas    | Foreign body in eyes                            | 0 (0 to 0) | 0 (0 to 0) | 0% (0% to 0%)             |
| Bahamas    | Foreign body in other body part                 | 0 (0 to 0) | 0 (0 to 0) | -5.6% (-9.3% to -1%)      |
| Bahamas    | Motor vehicle road injuries                     | 1 (0 to 1) | 1 (0 to 1) | -26.8% (-34% to -18.5%)   |
| Bahamas    | Motorcyclist road injuries                      | 0 (0 to 1) | 0 (0 to 1) | 13.8% (-0.5% to 32%)      |
| Bahamas    | Non-venomous animal contact                     | 0 (0 to 0) | 0 (0 to 0) | 7.4% (1.2% to 15%)        |
| Bahamas    | Other exposure to mechanical forces             | 0 (0 to 0) | 0 (0 to 0) | 16.5% (9.8% to 23%)       |
| Bahamas    | Other road injuries                             | 0 (0 to 0) | 0 (0 to 0) | -20.6% (-29.1% to -10.2%) |
| Bahamas    | Other transport injuries                        | 0 (0 to 0) | 0 (0 to 0) | 23.6% (17% to 30.9%)      |
| Bahamas    | Other unintentional injuries                    | 0 (0 to 0) | 0 (0 to 0) | -5.4% (-10.1% to -0.7%)   |
| Bahamas    | Pedestrian road injuries                        | 0 (0 to 0) | 0 (0 to 0) | -34.5% (-41.5% to -26.4%) |
| Bahamas    | Physical violence by firearm                    | 0 (0 to 0) | 0 (0 to 1) | 137% (99.1% to 191.4%)    |
| Bahamas    | Physical violence by other means                | 0 (0 to 0) | 0 (0 to 0) | 3.9% (-7.3% to 14.7%)     |
| Bahamas    | Physical violence by sharp object               | 0 (0 to 0) | 0 (0 to 0) | 16.3% (-0.2% to 33.9%)    |
| Bahamas    | Poisoning by carbon monoxide                    | 0 (0 to 0) | 0 (0 to 0) | 12.2% (-0.2% to 24.6%)    |
| Bahamas    | Poisoning by other means                        | 0 (0 to 0) | 0 (0 to 0) | -5.1% (-13.4% to 4%)      |
| Bahamas    | Pulmonary aspiration and foreign body in airway | 0 (0 to 0) | 0 (0 to 0) | -24.5% (-31.5% to -17.1%) |
| Bahamas    | Self-harm by firearm                            | 0 (0 to 0) | 0 (0 to 0) | 0.8% (-9.1% to 9.9%)      |
| Bahamas    | Self-harm by other specified means              | 0 (0 to 0) | 0 (0 to 0) | 7.6% (1.2% to 15.7%)      |
| Bahamas    | Unintentional firearm injuries                  | 0 (0 to 0) | 0 (0 to 0) | 18.4% (11.4% to 26%)      |
| Bahamas    | Venomous animal contact                         | 0 (0 to 0) | 0 (0 to 0) | 4.6% (-1.9% to 12%)       |
| Bahrain    | Adverse effects of medical treatment            | 0 (0 to 0) | 0 (0 to 0) | 0% (0% to 0%)             |
| Bahrain    | Conflict and terrorism                          | 0 (0 to 0) | 0 (0 to 0) | NA                        |
| Bahrain    | Cyclist road injuries                           | 0 (0 to 0) | 0 (0 to 0) | -6% (-15.4% to 5%)        |
| Bahrain    | Drowning                                        | 0 (0 to 0) | 0 (0 to 0) | 105.5% (72% to 142.5%)    |
| Bahrain    | Environmental heat and cold exposure            | 0 (0 to 0) | 0 (0 to 0) | 2.9% (-2% to 8%)          |
| Bahrain    | Executions and police conflict                  | 0 (0 to 0) | 0 (0 to 0) | NA                        |

|            |                                                 |            |            |                           |
|------------|-------------------------------------------------|------------|------------|---------------------------|
| Bahrain    | Exposure to forces of nature                    | 0 (0 to 0) | 0 (0 to 0) | NA                        |
| Bahrain    | Falls                                           | 1 (1 to 2) | 2 (1 to 3) | 40.6% (34.9% to 46.4%)    |
| Bahrain    | Fire, heat, and hot substances                  | 0 (0 to 0) | 0 (0 to 0) | -3.9% (-9.9% to 2%)       |
| Bahrain    | Foreign body in eyes                            | 0 (0 to 0) | 0 (0 to 0) | 0% (0% to 0%)             |
| Bahrain    | Foreign body in other body part                 | 0 (0 to 0) | 0 (0 to 0) | 1.6% (-2% to 5.2%)        |
| Bahrain    | Motor vehicle road injuries                     | 1 (1 to 2) | 1 (0 to 1) | -39.5% (-45.5% to -33.2%) |
| Bahrain    | Motorcyclist road injuries                      | 0 (0 to 0) | 0 (0 to 0) | 3.4% (-9.1% to 16.9%)     |
| Bahrain    | Non-venomous animal contact                     | 0 (0 to 0) | 0 (0 to 0) | 0.5% (-4.7% to 4.9%)      |
| Bahrain    | Other exposure to mechanical forces             | 0 (0 to 0) | 0 (0 to 0) | 9.6% (3.5% to 15.6%)      |
| Bahrain    | Other road injuries                             | 0 (0 to 0) | 0 (0 to 0) | -5.8% (-16.2% to 6.2%)    |
| Bahrain    | Other transport injuries                        | 0 (0 to 0) | 0 (0 to 0) | 7.4% (2.4% to 13.2%)      |
| Bahrain    | Other unintentional injuries                    | 0 (0 to 0) | 0 (0 to 0) | -1% (-6% to 3.7%)         |
| Bahrain    | Pedestrian road injuries                        | 0 (0 to 0) | 0 (0 to 0) | -15.2% (-24% to -5.1%)    |
| Bahrain    | Physical violence by firearm                    | 0 (0 to 0) | 0 (0 to 0) | 110.5% (84.2% to 145.5%)  |
| Bahrain    | Physical violence by other means                | 0 (0 to 0) | 0 (0 to 0) | -14.3% (-21.7% to -8%)    |
| Bahrain    | Physical violence by sharp object               | 0 (0 to 0) | 0 (0 to 0) | -12.5% (-21% to -3.7%)    |
| Bahrain    | Poisoning by carbon monoxide                    | 0 (0 to 0) | 0 (0 to 0) | 45.4% (31.2% to 61.8%)    |
| Bahrain    | Poisoning by other means                        | 0 (0 to 0) | 0 (0 to 0) | -6.5% (-13.1% to 1%)      |
| Bahrain    | Pulmonary aspiration and foreign body in airway | 0 (0 to 0) | 0 (0 to 0) | -10% (-18.4% to -2.5%)    |
| Bahrain    | Self-harm by firearm                            | 0 (0 to 0) | 0 (0 to 0) | 19.8% (6.9% to 34.1%)     |
| Bahrain    | Self-harm by other specified means              | 0 (0 to 0) | 0 (0 to 0) | 33.6% (25.7% to 42.3%)    |
| Bahrain    | Unintentional firearm injuries                  | 0 (0 to 0) | 0 (0 to 0) | 10.6% (3% to 19.1%)       |
| Bahrain    | Venomous animal contact                         | 0 (0 to 0) | 0 (0 to 0) | 3.2% (-3.3% to 10.6%)     |
| Bangladesh | Adverse effects of medical treatment            | 0 (0 to 0) | 0 (0 to 0) | 0% (0% to 0%)             |
| Bangladesh | Conflict and terrorism                          | 0 (0 to 0) | 0 (0 to 0) | NA                        |
| Bangladesh | Cyclist road injuries                           | 1 (1 to 2) | 1 (1 to 2) | -5.1% (-12.1% to 2%)      |
| Bangladesh | Drowning                                        | 0 (0 to 0) | 0 (0 to 0) | -3.7% (-15.4% to 7.3%)    |
| Bangladesh | Environmental heat and cold exposure            | 0 (0 to 0) | 0 (0 to 0) | 8.9% (3.4% to 15.4%)      |
| Bangladesh | Executions and police conflict                  | 0 (0 to 0) | 0 (0 to 0) | NA                        |
| Bangladesh | Exposure to forces of nature                    | 0 (0 to 1) | 0 (0 to 0) | NA                        |
| Bangladesh | Falls                                           | 1 (1 to 1) | 1 (1 to 2) | 64.1% (57% to 71.7%)      |
| Bangladesh | Fire, heat, and hot substances                  | 0 (0 to 0) | 0 (0 to 0) | -7.9% (-18% to 1.3%)      |
| Bangladesh | Foreign body in eyes                            | 0 (0 to 0) | 0 (0 to 0) | 0% (0% to 0%)             |
| Bangladesh | Foreign body in other body part                 | 0 (0 to 0) | 0 (0 to 0) | -10.6% (-14.5% to -6.1%)  |
| Bangladesh | Motor vehicle road injuries                     | 0 (0 to 1) | 1 (0 to 1) | 12.4% (3% to 22.8%)       |
| Bangladesh | Motorcyclist road injuries                      | 0 (0 to 1) | 0 (0 to 1) | 22.2% (12.3% to 33.5%)    |
| Bangladesh | Non-venomous animal contact                     | 0 (0 to 0) | 0 (0 to 0) | -0.7% (-7% to 5.6%)       |
| Bangladesh | Other exposure to mechanical forces             | 0 (0 to 0) | 0 (0 to 0) | 30.1% (21.7% to 39%)      |
| Bangladesh | Other road injuries                             | 0 (0 to 0) | 0 (0 to 0) | 8.2% (-1.5% to 19.1%)     |
| Bangladesh | Other transport injuries                        | 0 (0 to 0) | 0 (0 to 0) | 5.4% (-0.2% to 11.1%)     |
| Bangladesh | Other unintentional injuries                    | 0 (0 to 0) | 0 (0 to 0) | 3.8% (-1.9% to 9.3%)      |
| Bangladesh | Pedestrian road injuries                        | 0 (0 to 1) | 0 (0 to 1) | 7.5% (-1.5% to 17.5%)     |
| Bangladesh | Physical violence by firearm                    | 0 (0 to 0) | 0 (0 to 0) | 44.1% (23.1% to 69.3%)    |

|            |                                                 |            |            |                           |
|------------|-------------------------------------------------|------------|------------|---------------------------|
| Bangladesh | Physical violence by other means                | 0 (0 to 0) | 0 (0 to 0) | -1% (-7.4% to 5.2%)       |
| Bangladesh | Physical violence by sharp object               | 0 (0 to 0) | 0 (0 to 0) | -7.7% (-16.1% to 1%)      |
| Bangladesh | Poisoning by carbon monoxide                    | 0 (0 to 0) | 0 (0 to 0) | 14.4% (0.9% to 29.7%)     |
| Bangladesh | Poisoning by other means                        | 0 (0 to 0) | 0 (0 to 0) | -11.4% (-18.1% to -4.7%)  |
| Bangladesh | Pulmonary aspiration and foreign body in airway | 0 (0 to 0) | 0 (0 to 0) | -32.3% (-42.1% to -21.7%) |
| Bangladesh | Self-harm by firearm                            | 0 (0 to 0) | 0 (0 to 0) | -8.6% (-22.3% to 7.7%)    |
| Bangladesh | Self-harm by other specified means              | 0 (0 to 0) | 0 (0 to 0) | -39.6% (-45.3% to -34%)   |
| Bangladesh | Unintentional firearm injuries                  | 0 (0 to 0) | 0 (0 to 0) | 7.2% (-2.8% to 15.6%)     |
| Bangladesh | Venomous animal contact                         | 0 (0 to 0) | 0 (0 to 0) | 8.5% (-1.7% to 18.9%)     |
| Barbados   | Adverse effects of medical treatment            | 0 (0 to 0) | 0 (0 to 0) | 0% (0% to 0%)             |
| Barbados   | Conflict and terrorism                          | 0 (0 to 0) | 0 (0 to 0) | NA                        |
| Barbados   | Cyclist road injuries                           | 0 (0 to 0) | 0 (0 to 0) | -11.1% (-20.2% to -1.4%)  |
| Barbados   | Drowning                                        | 0 (0 to 0) | 0 (0 to 0) | 28.9% (14% to 43.1%)      |
| Barbados   | Environmental heat and cold exposure            | 0 (0 to 0) | 0 (0 to 1) | 6.4% (1.5% to 11.1%)      |
| Barbados   | Executions and police conflict                  | 0 (0 to 0) | 0 (0 to 0) | NA                        |
| Barbados   | Exposure to forces of nature                    | 0 (0 to 0) | 0 (0 to 0) | NA                        |
| Barbados   | Falls                                           | 1 (1 to 1) | 2 (1 to 2) | 48.7% (43% to 54.1%)      |
| Barbados   | Fire, heat, and hot substances                  | 0 (0 to 0) | 0 (0 to 0) | -9.5% (-15.3% to -3.6%)   |
| Barbados   | Foreign body in eyes                            | 0 (0 to 0) | 0 (0 to 0) | 0% (0% to 0%)             |
| Barbados   | Foreign body in other body part                 | 0 (0 to 0) | 0 (0 to 0) | -1.6% (-5.3% to 1.6%)     |
| Barbados   | Motor vehicle road injuries                     | 1 (0 to 1) | 0 (0 to 1) | -21.6% (-29.3% to -13.7%) |
| Barbados   | Motorcyclist road injuries                      | 0 (0 to 0) | 0 (0 to 0) | -5.5% (-18.1% to 7.5%)    |
| Barbados   | Non-venomous animal contact                     | 0 (0 to 0) | 0 (0 to 0) | -3.5% (-7.9% to 1.3%)     |
| Barbados   | Other exposure to mechanical forces             | 0 (0 to 0) | 0 (0 to 1) | 28.4% (20% to 39.2%)      |
| Barbados   | Other road injuries                             | 0 (0 to 0) | 0 (0 to 0) | -9.3% (-18.9% to 2.1%)    |
| Barbados   | Other transport injuries                        | 0 (0 to 0) | 0 (0 to 0) | -0.8% (-5.1% to 3.4%)     |
| Barbados   | Other unintentional injuries                    | 0 (0 to 0) | 0 (0 to 0) | -1.3% (-5.9% to 3.8%)     |
| Barbados   | Pedestrian road injuries                        | 0 (0 to 0) | 0 (0 to 0) | -25.8% (-33.8% to -16.9%) |
| Barbados   | Physical violence by firearm                    | 0 (0 to 0) | 0 (0 to 0) | 76.1% (51.9% to 108.6%)   |
| Barbados   | Physical violence by other means                | 0 (0 to 0) | 0 (0 to 0) | -1.7% (-12% to 8%)        |
| Barbados   | Physical violence by sharp object               | 0 (0 to 0) | 0 (0 to 0) | 3.7% (-9% to 17.7%)       |
| Barbados   | Poisoning by carbon monoxide                    | 0 (0 to 0) | 0 (0 to 0) | 22% (6.4% to 37.5%)       |
| Barbados   | Poisoning by other means                        | 0 (0 to 0) | 0 (0 to 0) | -12.3% (-21.8% to -3.9%)  |
| Barbados   | Pulmonary aspiration and foreign body in airway | 0 (0 to 0) | 0 (0 to 0) | -11.7% (-18.8% to -4%)    |
| Barbados   | Self-harm by firearm                            | 0 (0 to 0) | 0 (0 to 0) | 6.1% (-4.3% to 18.8%)     |
| Barbados   | Self-harm by other specified means              | 0 (0 to 0) | 0 (0 to 0) | -11% (-18.8% to -3.8%)    |
| Barbados   | Unintentional firearm injuries                  | 0 (0 to 0) | 0 (0 to 0) | -3.8% (-14.7% to 5%)      |
| Barbados   | Venomous animal contact                         | 0 (0 to 0) | 0 (0 to 0) | -3.4% (-8.2% to 1.8%)     |
| Belarus    | Adverse effects of medical treatment            | 0 (0 to 0) | 0 (0 to 0) | 0% (0% to 0%)             |
| Belarus    | Conflict and terrorism                          | 0 (0 to 0) | 0 (0 to 0) | NA                        |
| Belarus    | Cyclist road injuries                           | 1 (0 to 1) | 0 (0 to 1) | -27% (-36.2% to -17.1%)   |
| Belarus    | Drowning                                        | 0 (0 to 0) | 0 (0 to 0) | 10.3% (-1.9% to 21.8%)    |
| Belarus    | Environmental heat and cold exposure            | 0 (0 to 1) | 0 (0 to 0) | -9.7% (-18.9% to 2.8%)    |

|         |                                                 |            |             |                           |
|---------|-------------------------------------------------|------------|-------------|---------------------------|
| Belarus | Executions and police conflict                  | 0 (0 to 0) | 0 (0 to 0)  | NA                        |
| Belarus | Exposure to forces of nature                    | 0 (0 to 0) | 0 (0 to 0)  | NA                        |
| Belarus | Falls                                           | 6 (4 to 7) | 7 (5 to 9)  | 21.5% (16.5% to 27.5%)    |
| Belarus | Fire, heat, and hot substances                  | 0 (0 to 0) | 0 (0 to 0)  | -3.6% (-9.7% to 2%)       |
| Belarus | Foreign body in eyes                            | 0 (0 to 0) | 0 (0 to 0)  | 0% (0% to 0%)             |
| Belarus | Foreign body in other body part                 | 0 (0 to 0) | 0 (0 to 0)  | 0% (-4.8% to 4.4%)        |
| Belarus | Motor vehicle road injuries                     | 2 (1 to 4) | 2 (1 to 3)  | -30.7% (-40.4% to -21%)   |
| Belarus | Motorcyclist road injuries                      | 0 (0 to 1) | 0 (0 to 0)  | -40.7% (-50.8% to -30.1%) |
| Belarus | Non-venomous animal contact                     | 0 (0 to 0) | 0 (0 to 0)  | -10.3% (-14.1% to -6.3%)  |
| Belarus | Other exposure to mechanical forces             | 1 (0 to 2) | 1 (0 to 2)  | -5.3% (-10.8% to 0.2%)    |
| Belarus | Other road injuries                             | 0 (0 to 0) | 0 (0 to 0)  | -18.4% (-28.8% to -7.8%)  |
| Belarus | Other transport injuries                        | 0 (0 to 0) | 0 (0 to 0)  | 3.4% (-0.6% to 7.2%)      |
| Belarus | Other unintentional injuries                    | 0 (0 to 0) | 0 (0 to 0)  | -8.6% (-14% to -3.4%)     |
| Belarus | Pedestrian road injuries                        | 1 (0 to 1) | 0 (0 to 1)  | -53.2% (-59.8% to -46.4%) |
| Belarus | Physical violence by firearm                    | 0 (0 to 0) | 0 (0 to 0)  | 52% (29.2% to 82.3%)      |
| Belarus | Physical violence by other means                | 0 (0 to 1) | 0 (0 to 1)  | -18.3% (-26.5% to -7%)    |
| Belarus | Physical violence by sharp object               | 0 (0 to 0) | 0 (0 to 0)  | -32.9% (-42.7% to -21.9%) |
| Belarus | Poisoning by carbon monoxide                    | 0 (0 to 0) | 0 (0 to 0)  | -14.1% (-25.9% to -1.1%)  |
| Belarus | Poisoning by other means                        | 0 (0 to 0) | 0 (0 to 0)  | -7.6% (-17.5% to 2.1%)    |
| Belarus | Pulmonary aspiration and foreign body in airway | 0 (0 to 0) | 0 (0 to 0)  | -12.8% (-18.9% to -6%)    |
| Belarus | Self-harm by firearm                            | 0 (0 to 0) | 0 (0 to 0)  | 8% (-8.3% to 26.2%)       |
| Belarus | Self-harm by other specified means              | 0 (0 to 1) | 0 (0 to 1)  | -3.1% (-8.8% to 3.5%)     |
| Belarus | Unintentional firearm injuries                  | 0 (0 to 0) | 0 (0 to 0)  | 3.2% (-6.5% to 13.1%)     |
| Belarus | Venomous animal contact                         | 0 (0 to 0) | 0 (0 to 0)  | -10.4% (-16.2% to -4.7%)  |
| Belgium | Adverse effects of medical treatment            | 0 (0 to 0) | 0 (0 to 0)  | 0% (0% to 0%)             |
| Belgium | Conflict and terrorism                          | 0 (0 to 0) | 0 (0 to 0)  | NA                        |
| Belgium | Cyclist road injuries                           | 0 (0 to 0) | 0 (0 to 0)  | -21% (-32.2% to -8.4%)    |
| Belgium | Drowning                                        | 0 (0 to 0) | 0 (0 to 0)  | 51.1% (38.1% to 66.5%)    |
| Belgium | Environmental heat and cold exposure            | 0 (0 to 0) | 0 (0 to 0)  | -0.8% (-5.4% to 4.1%)     |
| Belgium | Executions and police conflict                  | 0 (0 to 0) | 0 (0 to 0)  | NA                        |
| Belgium | Exposure to forces of nature                    | 0 (0 to 0) | 0 (0 to 0)  | NA                        |
| Belgium | Falls                                           | 7 (5 to 9) | 9 (6 to 12) | 33.4% (29.1% to 38.3%)    |
| Belgium | Fire, heat, and hot substances                  | 0 (0 to 0) | 0 (0 to 0)  | -12.3% (-17.7% to -7.4%)  |
| Belgium | Foreign body in eyes                            | 0 (0 to 0) | 0 (0 to 0)  | 0% (0% to 0%)             |
| Belgium | Foreign body in other body part                 | 0 (0 to 0) | 0 (0 to 0)  | 7.5% (3% to 12.7%)        |
| Belgium | Motor vehicle road injuries                     | 1 (0 to 1) | 0 (0 to 1)  | -50.7% (-57.7% to -43.6%) |
| Belgium | Motorcyclist road injuries                      | 0 (0 to 0) | 0 (0 to 0)  | -5.7% (-22.2% to 14%)     |
| Belgium | Non-venomous animal contact                     | 0 (0 to 0) | 0 (0 to 0)  | -7.6% (-11.3% to -3.4%)   |
| Belgium | Other exposure to mechanical forces             | 1 (0 to 1) | 1 (0 to 1)  | -5.4% (-11.6% to -0.1%)   |
| Belgium | Other road injuries                             | 0 (0 to 0) | 0 (0 to 0)  | -9.3% (-23.2% to 7.2%)    |
| Belgium | Other transport injuries                        | 0 (0 to 0) | 0 (0 to 0)  | 10.3% (5.2% to 15.2%)     |
| Belgium | Other unintentional injuries                    | 0 (0 to 0) | 0 (0 to 0)  | -7.4% (-12% to -2.7%)     |
| Belgium | Pedestrian road injuries                        | 0 (0 to 0) | 0 (0 to 0)  | -63.5% (-70.3% to -55.8%) |

|         |                                                 |            |            |                           |
|---------|-------------------------------------------------|------------|------------|---------------------------|
| Belgium | Physical violence by firearm                    | 0 (0 to 0) | 0 (0 to 0) | 7.6% (-2.9% to 19.4%)     |
| Belgium | Physical violence by other means                | 0 (0 to 0) | 0 (0 to 0) | -13.4% (-19.9% to -7.5%)  |
| Belgium | Physical violence by sharp object               | 0 (0 to 0) | 0 (0 to 0) | -20.4% (-28.6% to -12.3%) |
| Belgium | Poisoning by carbon monoxide                    | 0 (0 to 0) | 0 (0 to 0) | -24.6% (-32.9% to -16%)   |
| Belgium | Poisoning by other means                        | 0 (0 to 0) | 0 (0 to 0) | -29.2% (-35.5% to -22.6%) |
| Belgium | Pulmonary aspiration and foreign body in airway | 0 (0 to 0) | 0 (0 to 0) | -10.9% (-20.6% to 0.2%)   |
| Belgium | Self-harm by firearm                            | 0 (0 to 0) | 0 (0 to 0) | -28% (-40.5% to -15.3%)   |
| Belgium | Self-harm by other specified means              | 0 (0 to 1) | 0 (0 to 1) | -8.2% (-13% to -3.4%)     |
| Belgium | Unintentional firearm injuries                  | 0 (0 to 0) | 0 (0 to 0) | -1.1% (-9.5% to 7.4%)     |
| Belgium | Venomous animal contact                         | 0 (0 to 0) | 0 (0 to 0) | -8% (-13.6% to -1.1%)     |
| Belize  | Adverse effects of medical treatment            | 0 (0 to 0) | 0 (0 to 0) | 0% (0% to 0%)             |
| Belize  | Conflict and terrorism                          | 2 (0 to 5) | 0 (0 to 0) | NA                        |
| Belize  | Cyclist road injuries                           | 0 (0 to 1) | 0 (0 to 1) | -22% (-31.6% to -11.2%)   |
| Belize  | Drowning                                        | 0 (0 to 0) | 0 (0 to 0) | 26.2% (15.9% to 38.8%)    |
| Belize  | Environmental heat and cold exposure            | 0 (0 to 0) | 0 (0 to 0) | 5.2% (1.5% to 9.6%)       |
| Belize  | Executions and police conflict                  | 0 (0 to 0) | 0 (0 to 0) | NA                        |
| Belize  | Exposure to forces of nature                    | 0 (0 to 0) | 0 (0 to 0) | NA                        |
| Belize  | Falls                                           | 1 (1 to 1) | 1 (1 to 2) | 55.7% (49.9% to 61.7%)    |
| Belize  | Fire, heat, and hot substances                  | 0 (0 to 0) | 0 (0 to 0) | 3.1% (-4.2% to 11.9%)     |
| Belize  | Foreign body in eyes                            | 0 (0 to 0) | 0 (0 to 0) | 0% (0% to 0%)             |
| Belize  | Foreign body in other body part                 | 0 (0 to 0) | 0 (0 to 0) | -2.4% (-6.3% to 1.6%)     |
| Belize  | Motor vehicle road injuries                     | 1 (0 to 1) | 1 (0 to 1) | -7.1% (-16.9% to 3.8%)    |
| Belize  | Motorcyclist road injuries                      | 0 (0 to 0) | 0 (0 to 1) | 54.2% (30.8% to 82.1%)    |
| Belize  | Non-venomous animal contact                     | 0 (0 to 0) | 0 (0 to 0) | 25.4% (14.2% to 37.9%)    |
| Belize  | Other exposure to mechanical forces             | 0 (0 to 1) | 0 (0 to 1) | 31.6% (20.1% to 42.7%)    |
| Belize  | Other road injuries                             | 0 (0 to 0) | 0 (0 to 0) | 2% (-9.2% to 14.2%)       |
| Belize  | Other transport injuries                        | 0 (0 to 0) | 0 (0 to 0) | 27.2% (19.1% to 36.1%)    |
| Belize  | Other unintentional injuries                    | 0 (0 to 0) | 0 (0 to 0) | 3.8% (-1.4% to 8.9%)      |
| Belize  | Pedestrian road injuries                        | 0 (0 to 0) | 0 (0 to 0) | -13.6% (-23.2% to -2.5%)  |
| Belize  | Physical violence by firearm                    | 0 (0 to 0) | 0 (0 to 0) | 283.5% (215.8% to 390.7%) |
| Belize  | Physical violence by other means                | 0 (0 to 0) | 0 (0 to 0) | 58% (37.7% to 78.8%)      |
| Belize  | Physical violence by sharp object               | 0 (0 to 0) | 0 (0 to 0) | 68.8% (42.5% to 96%)      |
| Belize  | Poisoning by carbon monoxide                    | 0 (0 to 0) | 0 (0 to 0) | 18.2% (-1.2% to 37.8%)    |
| Belize  | Poisoning by other means                        | 0 (0 to 0) | 0 (0 to 0) | -28.2% (-39.5% to -15.7%) |
| Belize  | Pulmonary aspiration and foreign body in airway | 0 (0 to 0) | 0 (0 to 0) | -23.9% (-31.2% to -15.4%) |
| Belize  | Self-harm by firearm                            | 0 (0 to 0) | 0 (0 to 0) | 28.9% (15.3% to 46.9%)    |
| Belize  | Self-harm by other specified means              | 0 (0 to 0) | 0 (0 to 0) | 4.5% (-5% to 13.2%)       |
| Belize  | Unintentional firearm injuries                  | 0 (0 to 1) | 0 (0 to 1) | 17% (4.6% to 27.2%)       |
| Belize  | Venomous animal contact                         | 0 (0 to 0) | 0 (0 to 0) | 40.6% (26.6% to 58.6%)    |
| Benin   | Adverse effects of medical treatment            | 0 (0 to 0) | 0 (0 to 0) | 0% (0% to 0%)             |
| Benin   | Conflict and terrorism                          | 0 (0 to 0) | 0 (0 to 0) | NA                        |
| Benin   | Cyclist road injuries                           | 1 (1 to 3) | 1 (1 to 3) | 0.9% (-8% to 9.2%)        |
| Benin   | Drowning                                        | 0 (0 to 0) | 0 (0 to 0) | -13.1% (-20% to -6%)      |

|         |                                                 |            |            |                           |
|---------|-------------------------------------------------|------------|------------|---------------------------|
| Benin   | Environmental heat and cold exposure            | 0 (0 to 0) | 0 (0 to 0) | 2.6% (-2% to 8.1%)        |
| Benin   | Executions and police conflict                  | 0 (0 to 0) | 0 (0 to 0) | NA                        |
| Benin   | Exposure to forces of nature                    | 0 (0 to 0) | 0 (0 to 0) | NA                        |
| Benin   | Falls                                           | 3 (2 to 4) | 3 (2 to 4) | 14.7% (10.8% to 19.3%)    |
| Benin   | Fire, heat, and hot substances                  | 0 (0 to 0) | 0 (0 to 0) | -5.9% (-10.9% to -0.6%)   |
| Benin   | Foreign body in eyes                            | 0 (0 to 0) | 0 (0 to 0) | 0% (0% to 0%)             |
| Benin   | Foreign body in other body part                 | 1 (0 to 1) | 1 (0 to 1) | 0.3% (-3.1% to 3.4%)      |
| Benin   | Motor vehicle road injuries                     | 1 (1 to 3) | 2 (1 to 3) | 25% (15.6% to 36.8%)      |
| Benin   | Motorcyclist road injuries                      | 1 (1 to 3) | 1 (0 to 2) | -23.7% (-30.2% to -16.8%) |
| Benin   | Non-venomous animal contact                     | 0 (0 to 0) | 0 (0 to 0) | -2.2% (-6.5% to 2.3%)     |
| Benin   | Other exposure to mechanical forces             | 0 (0 to 0) | 0 (0 to 0) | -10% (-14.6% to -5.5%)    |
| Benin   | Other road injuries                             | 0 (0 to 0) | 0 (0 to 0) | 9.1% (-1.9% to 21.3%)     |
| Benin   | Other transport injuries                        | 0 (0 to 1) | 0 (0 to 1) | -11.7% (-15.7% to -7.7%)  |
| Benin   | Other unintentional injuries                    | 0 (0 to 1) | 0 (0 to 0) | -12.5% (-16.9% to -7.8%)  |
| Benin   | Pedestrian road injuries                        | 1 (1 to 3) | 2 (1 to 3) | 19.4% (11.2% to 28.7%)    |
| Benin   | Physical violence by firearm                    | 0 (0 to 0) | 0 (0 to 0) | 37.4% (24.1% to 55.3%)    |
| Benin   | Physical violence by other means                | 0 (0 to 0) | 0 (0 to 0) | 17.3% (10.7% to 24.6%)    |
| Benin   | Physical violence by sharp object               | 0 (0 to 0) | 0 (0 to 0) | 17.9% (9.8% to 26.5%)     |
| Benin   | Poisoning by carbon monoxide                    | 0 (0 to 0) | 0 (0 to 0) | 14.1% (2.6% to 27.3%)     |
| Benin   | Poisoning by other means                        | 0 (0 to 0) | 0 (0 to 0) | -17.9% (-23.9% to -11.6%) |
| Benin   | Pulmonary aspiration and foreign body in airway | 0 (0 to 0) | 0 (0 to 0) | -8.6% (-16.7% to 0.4%)    |
| Benin   | Self-harm by firearm                            | 0 (0 to 0) | 0 (0 to 0) | 19.5% (7.3% to 34.8%)     |
| Benin   | Self-harm by other specified means              | 0 (0 to 0) | 0 (0 to 0) | 12.6% (7.6% to 17.9%)     |
| Benin   | Unintentional firearm injuries                  | 0 (0 to 0) | 0 (0 to 0) | -14.3% (-21.5% to -7.3%)  |
| Benin   | Venomous animal contact                         | 0 (0 to 0) | 0 (0 to 0) | -1.8% (-7.9% to 5.3%)     |
| Bermuda | Adverse effects of medical treatment            | 0 (0 to 0) | 0 (0 to 0) | 0% (0% to 0%)             |
| Bermuda | Conflict and terrorism                          | 0 (0 to 0) | 0 (0 to 0) | NA                        |
| Bermuda | Cyclist road injuries                           | 1 (0 to 2) | 1 (0 to 1) | -22% (-30.2% to -12.1%)   |
| Bermuda | Drowning                                        | 0 (0 to 0) | 0 (0 to 0) | 67% (51.6% to 83.7%)      |
| Bermuda | Environmental heat and cold exposure            | 0 (0 to 0) | 0 (0 to 0) | 2.5% (-1.4% to 7.1%)      |
| Bermuda | Executions and police conflict                  | 0 (0 to 0) | 0 (0 to 0) | NA                        |
| Bermuda | Exposure to forces of nature                    | 0 (0 to 0) | 0 (0 to 0) | NA                        |
| Bermuda | Falls                                           | 4 (3 to 5) | 6 (4 to 8) | 49.6% (43.6% to 55.1%)    |
| Bermuda | Fire, heat, and hot substances                  | 0 (0 to 0) | 0 (0 to 1) | 21.4% (16.1% to 27.6%)    |
| Bermuda | Foreign body in eyes                            | 0 (0 to 0) | 0 (0 to 0) | 0% (0% to 0%)             |
| Bermuda | Foreign body in other body part                 | 0 (0 to 0) | 0 (0 to 0) | 6.7% (0.7% to 11.5%)      |
| Bermuda | Motor vehicle road injuries                     | 1 (0 to 1) | 0 (0 to 1) | -24.4% (-33.8% to -14.1%) |
| Bermuda | Motorcyclist road injuries                      | 2 (1 to 4) | 2 (1 to 3) | -31.2% (-38.9% to -23%)   |
| Bermuda | Non-venomous animal contact                     | 0 (0 to 0) | 0 (0 to 0) | -2.4% (-6.4% to 2.2%)     |
| Bermuda | Other exposure to mechanical forces             | 0 (0 to 1) | 1 (0 to 1) | 19.2% (11.9% to 26%)      |
| Bermuda | Other road injuries                             | 0 (0 to 0) | 0 (0 to 0) | -18.9% (-27.4% to -8.7%)  |
| Bermuda | Other transport injuries                        | 0 (0 to 0) | 0 (0 to 0) | 9.7% (5.1% to 15.3%)      |
| Bermuda | Other unintentional injuries                    | 0 (0 to 1) | 1 (0 to 1) | 11.8% (5.5% to 17.6%)     |



|                                  |                                                 |            |            |                           |
|----------------------------------|-------------------------------------------------|------------|------------|---------------------------|
| Bermuda                          | Pedestrian road injuries                        | 1 (0 to 1) | 0 (0 to 1) | -16.2% (-25% to -6%)      |
| Bermuda                          | Physical violence by firearm                    | 0 (0 to 0) | 0 (0 to 0) | 79.9% (59.9% to 107.6%)   |
| Bermuda                          | Physical violence by other means                | 0 (0 to 0) | 0 (0 to 0) | -4.1% (-13.1% to 4%)      |
| Bermuda                          | Physical violence by sharp object               | 0 (0 to 0) | 0 (0 to 0) | -7.6% (-18.7% to 2.3%)    |
| Bermuda                          | Poisoning by carbon monoxide                    | 0 (0 to 0) | 0 (0 to 0) | 2.3% (-10.8% to 15.9%)    |
| Bermuda                          | Poisoning by other means                        | 0 (0 to 0) | 0 (0 to 0) | -19.1% (-30.2% to -7.7%)  |
| Bermuda                          | Pulmonary aspiration and foreign body in airway | 0 (0 to 0) | 0 (0 to 0) | -1.7% (-11.1% to 7.5%)    |
| Bermuda                          | Self-harm by firearm                            | 0 (0 to 0) | 0 (0 to 0) | 5.7% (-4.6% to 20.6%)     |
| Bermuda                          | Self-harm by other specified means              | 0 (0 to 0) | 0 (0 to 0) | -15.1% (-23.7% to -6.8%)  |
| Bermuda                          | Unintentional firearm injuries                  | 0 (0 to 0) | 0 (0 to 0) | 34.6% (24.8% to 47%)      |
| Bermuda                          | Venomous animal contact                         | 0 (0 to 0) | 0 (0 to 0) | -2.6% (-7.7% to 2.8%)     |
| Bhutan                           | Adverse effects of medical treatment            | 0 (0 to 0) | 0 (0 to 0) | 0% (0% to 0%)             |
| Bhutan                           | Conflict and terrorism                          | 0 (0 to 0) | 0 (0 to 0) | NA                        |
| Bhutan                           | Cyclist road injuries                           | 1 (0 to 1) | 1 (1 to 2) | 31.4% (21% to 42.9%)      |
| Bhutan                           | Drowning                                        | 0 (0 to 0) | 0 (0 to 0) | 24.8% (8.6% to 38.5%)     |
| Bhutan                           | Environmental heat and cold exposure            | 0 (0 to 0) | 0 (0 to 0) | 6.5% (2.3% to 11%)        |
| Bhutan                           | Executions and police conflict                  | 0 (0 to 0) | 0 (0 to 0) | NA                        |
| Bhutan                           | Exposure to forces of nature                    | 0 (0 to 0) | 0 (0 to 0) | NA                        |
| Bhutan                           | Falls                                           | 1 (1 to 2) | 3 (2 to 4) | 101.1% (90.9% to 112.6%)  |
| Bhutan                           | Fire, heat, and hot substances                  | 0 (0 to 0) | 0 (0 to 0) | -9.2% (-15.3% to -2.3%)   |
| Bhutan                           | Foreign body in eyes                            | 0 (0 to 0) | 0 (0 to 0) | 0% (0% to 0%)             |
| Bhutan                           | Foreign body in other body part                 | 0 (0 to 0) | 0 (0 to 0) | 0.9% (-3.9% to 4.7%)      |
| Bhutan                           | Motor vehicle road injuries                     | 1 (0 to 1) | 1 (0 to 2) | 16.2% (6.6% to 26.4%)     |
| Bhutan                           | Motorcyclist road injuries                      | 0 (0 to 1) | 0 (0 to 1) | -4.3% (-13.8% to 4.9%)    |
| Bhutan                           | Non-venomous animal contact                     | 0 (0 to 1) | 0 (0 to 0) | -20.8% (-25.7% to -15.4%) |
| Bhutan                           | Other exposure to mechanical forces             | 0 (0 to 1) | 0 (0 to 1) | -8.3% (-14.8% to -1.3%)   |
| Bhutan                           | Other road injuries                             | 0 (0 to 0) | 0 (0 to 0) | 36.8% (25.4% to 49.7%)    |
| Bhutan                           | Other transport injuries                        | 0 (0 to 0) | 0 (0 to 0) | -4.8% (-10.9% to 1.8%)    |
| Bhutan                           | Other unintentional injuries                    | 0 (0 to 0) | 0 (0 to 0) | 2.7% (-1.3% to 6.8%)      |
| Bhutan                           | Pedestrian road injuries                        | 1 (0 to 1) | 0 (0 to 1) | -17.6% (-24.5% to -10%)   |
| Bhutan                           | Physical violence by firearm                    | 0 (0 to 0) | 0 (0 to 0) | 60.3% (35.8% to 87.7%)    |
| Bhutan                           | Physical violence by other means                | 0 (0 to 1) | 0 (0 to 1) | 1.1% (-5% to 7.2%)        |
| Bhutan                           | Physical violence by sharp object               | 0 (0 to 0) | 0 (0 to 0) | -13.3% (-21.7% to -5.7%)  |
| Bhutan                           | Poisoning by carbon monoxide                    | 0 (0 to 0) | 0 (0 to 0) | 46.3% (28.8% to 66.6%)    |
| Bhutan                           | Poisoning by other means                        | 0 (0 to 0) | 0 (0 to 0) | 0.3% (-8.5% to 9.5%)      |
| Bhutan                           | Pulmonary aspiration and foreign body in airway | 0 (0 to 0) | 0 (0 to 0) | -26.9% (-33.5% to -20.1%) |
| Bhutan                           | Self-harm by firearm                            | 0 (0 to 0) | 0 (0 to 0) | 17.3% (3.7% to 37.8%)     |
| Bhutan                           | Self-harm by other specified means              | 0 (0 to 0) | 0 (0 to 0) | -4.2% (-10.9% to 2.6%)    |
| Bhutan                           | Unintentional firearm injuries                  | 0 (0 to 0) | 0 (0 to 0) | -36.7% (-44.2% to -30.2%) |
| Bhutan                           | Venomous animal contact                         | 0 (0 to 0) | 0 (0 to 0) | -5.6% (-13.7% to 3.7%)    |
| Bolivia (Plurinational State of) | Adverse effects of medical treatment            | 0 (0 to 0) | 0 (0 to 0) | 0% (0% to 0%)             |
| Bolivia (Plurinational State of) | Conflict and terrorism                          | 0 (0 to 0) | 0 (0 to 0) | NA                        |
| Bolivia (Plurinational State of) | Cyclist road injuries                           | 0 (0 to 0) | 0 (0 to 0) | -11.5% (-19.7% to -3.2%)  |

|                                  |                                                 |             |            |                           |
|----------------------------------|-------------------------------------------------|-------------|------------|---------------------------|
| Bolivia (Plurinational State of) | Drowning                                        | 0 (0 to 0)  | 0 (0 to 0) | -15.8% (-24.7% to -5.8%)  |
| Bolivia (Plurinational State of) | Environmental heat and cold exposure            | 0 (0 to 0)  | 0 (0 to 0) | -0.5% (-4.4% to 3.9%)     |
| Bolivia (Plurinational State of) | Executions and police conflict                  | 0 (0 to 0)  | 0 (0 to 0) | NA                        |
| Bolivia (Plurinational State of) | Exposure to forces of nature                    | 0 (0 to 0)  | 0 (0 to 0) | NA                        |
| Bolivia (Plurinational State of) | Falls                                           | 1 (1 to 2)  | 2 (1 to 2) | 33.9% (28.4% to 39.5%)    |
| Bolivia (Plurinational State of) | Fire, heat, and hot substances                  | 0 (0 to 0)  | 0 (0 to 0) | -21% (-27.6% to -14.6%)   |
| Bolivia (Plurinational State of) | Foreign body in eyes                            | 0 (0 to 0)  | 0 (0 to 0) | 0% (0% to 0%)             |
| Bolivia (Plurinational State of) | Foreign body in other body part                 | 0 (0 to 0)  | 0 (0 to 0) | -9.8% (-15.6% to -4.5%)   |
| Bolivia (Plurinational State of) | Motor vehicle road injuries                     | 0 (0 to 1)  | 0 (0 to 1) | -12.2% (-18.9% to -4.6%)  |
| Bolivia (Plurinational State of) | Motorcyclist road injuries                      | 0 (0 to 0)  | 0 (0 to 0) | -7.7% (-16.8% to 3%)      |
| Bolivia (Plurinational State of) | Non-venomous animal contact                     | 0 (0 to 0)  | 0 (0 to 0) | -5.2% (-9.6% to -0.6%)    |
| Bolivia (Plurinational State of) | Other exposure to mechanical forces             | 0 (0 to 1)  | 0 (0 to 1) | 8.4% (-0.7% to 19.8%)     |
| Bolivia (Plurinational State of) | Other road injuries                             | 0 (0 to 0)  | 0 (0 to 0) | -8.9% (-17.9% to 1%)      |
| Bolivia (Plurinational State of) | Other transport injuries                        | 0 (0 to 0)  | 0 (0 to 0) | -1.1% (-5.4% to 3.5%)     |
| Bolivia (Plurinational State of) | Other unintentional injuries                    | 0 (0 to 0)  | 0 (0 to 0) | -32.2% (-36.1% to -28.3%) |
| Bolivia (Plurinational State of) | Pedestrian road injuries                        | 0 (0 to 0)  | 0 (0 to 0) | -38.8% (-44.6% to -32.3%) |
| Bolivia (Plurinational State of) | Physical violence by firearm                    | 0 (0 to 0)  | 0 (0 to 0) | 48.4% (30% to 74.6%)      |
| Bolivia (Plurinational State of) | Physical violence by other means                | 0 (0 to 0)  | 0 (0 to 0) | -9.6% (-18.1% to -2%)     |
| Bolivia (Plurinational State of) | Physical violence by sharp object               | 0 (0 to 0)  | 0 (0 to 0) | -10.6% (-18.9% to -2.1%)  |
| Bolivia (Plurinational State of) | Poisoning by carbon monoxide                    | 0 (0 to 0)  | 0 (0 to 0) | 49.6% (28.3% to 73.2%)    |
| Bolivia (Plurinational State of) | Poisoning by other means                        | 0 (0 to 0)  | 0 (0 to 0) | -17.9% (-25.6% to -9.9%)  |
| Bolivia (Plurinational State of) | Pulmonary aspiration and foreign body in airway | 0 (0 to 0)  | 0 (0 to 0) | -53.1% (-60.1% to -46.1%) |
| Bolivia (Plurinational State of) | Self-harm by firearm                            | 0 (0 to 0)  | 0 (0 to 0) | 25% (10.4% to 40.3%)      |
| Bolivia (Plurinational State of) | Self-harm by other specified means              | 0 (0 to 0)  | 0 (0 to 0) | 7.3% (-0.6% to 15.5%)     |
| Bolivia (Plurinational State of) | Unintentional firearm injuries                  | 0 (0 to 0)  | 0 (0 to 0) | -23.8% (-32.9% to -16.5%) |
| Bolivia (Plurinational State of) | Venomous animal contact                         | 0 (0 to 0)  | 0 (0 to 0) | -8% (-12.4% to -3.2%)     |
| Bosnia and Herzegovina           | Adverse effects of medical treatment            | 0 (0 to 0)  | 0 (0 to 0) | 0% (0% to 0%)             |
| Bosnia and Herzegovina           | Conflict and terrorism                          | 4 (1 to 14) | 0 (0 to 0) | NA                        |
| Bosnia and Herzegovina           | Cyclist road injuries                           | 1 (0 to 1)  | 1 (0 to 1) | -4.9% (-13% to 3.4%)      |
| Bosnia and Herzegovina           | Drowning                                        | 0 (0 to 0)  | 0 (0 to 0) | 116.7% (86.1% to 145.4%)  |
| Bosnia and Herzegovina           | Environmental heat and cold exposure            | 0 (0 to 0)  | 0 (0 to 0) | 4.7% (-1.1% to 11.3%)     |
| Bosnia and Herzegovina           | Executions and police conflict                  | 0 (0 to 0)  | 0 (0 to 0) | NA                        |
| Bosnia and Herzegovina           | Exposure to forces of nature                    | 0 (0 to 0)  | 0 (0 to 0) | NA                        |
| Bosnia and Herzegovina           | Falls                                           | 4 (3 to 6)  | 5 (4 to 7) | 25.4% (20.7% to 30.3%)    |
| Bosnia and Herzegovina           | Fire, heat, and hot substances                  | 0 (0 to 0)  | 0 (0 to 0) | -16.9% (-21.2% to -12.9%) |
| Bosnia and Herzegovina           | Foreign body in eyes                            | 0 (0 to 0)  | 0 (0 to 0) | 0% (0% to 0%)             |
| Bosnia and Herzegovina           | Foreign body in other body part                 | 0 (0 to 0)  | 0 (0 to 0) | -3.8% (-7.3% to 0.2%)     |
| Bosnia and Herzegovina           | Motor vehicle road injuries                     | 1 (1 to 2)  | 1 (1 to 2) | 17.8% (8.1% to 28%)       |
| Bosnia and Herzegovina           | Motorcyclist road injuries                      | 0 (0 to 0)  | 0 (0 to 0) | 6% (-7% to 20.8%)         |
| Bosnia and Herzegovina           | Non-venomous animal contact                     | 0 (0 to 0)  | 0 (0 to 0) | -30% (-33.1% to -25.9%)   |
| Bosnia and Herzegovina           | Other exposure to mechanical forces             | 2 (1 to 3)  | 2 (1 to 3) | -7.2% (-13.4% to -1%)     |
| Bosnia and Herzegovina           | Other road injuries                             | 0 (0 to 0)  | 0 (0 to 0) | -9.7% (-17.6% to -1%)     |
| Bosnia and Herzegovina           | Other transport injuries                        | 0 (0 to 0)  | 0 (0 to 0) | -7.8% (-12.3% to -3.7%)   |

|                        |                                                 |            |            |                           |
|------------------------|-------------------------------------------------|------------|------------|---------------------------|
| Bosnia and Herzegovina | Other unintentional injuries                    | 0 (0 to 1) | 0 (0 to 0) | -10.7% (-15.5% to -6.5%)  |
| Bosnia and Herzegovina | Pedestrian road injuries                        | 0 (0 to 1) | 0 (0 to 1) | -7.1% (-14.3% to 0.7%)    |
| Bosnia and Herzegovina | Physical violence by firearm                    | 0 (0 to 0) | 0 (0 to 0) | 107.8% (85.2% to 136.6%)  |
| Bosnia and Herzegovina | Physical violence by other means                | 1 (0 to 1) | 0 (0 to 1) | -22.5% (-28.6% to -16.6%) |
| Bosnia and Herzegovina | Physical violence by sharp object               | 0 (0 to 0) | 0 (0 to 0) | -5.6% (-14.3% to 4.3%)    |
| Bosnia and Herzegovina | Poisoning by carbon monoxide                    | 0 (0 to 0) | 0 (0 to 0) | -4.7% (-22.2% to 14.8%)   |
| Bosnia and Herzegovina | Poisoning by other means                        | 0 (0 to 0) | 0 (0 to 0) | -43.2% (-53.6% to -31.1%) |
| Bosnia and Herzegovina | Pulmonary aspiration and foreign body in airway | 0 (0 to 0) | 0 (0 to 0) | -14.8% (-21.5% to -6.7%)  |
| Bosnia and Herzegovina | Self-harm by firearm                            | 0 (0 to 0) | 0 (0 to 0) | 44.9% (27.8% to 64.9%)    |
| Bosnia and Herzegovina | Self-harm by other specified means              | 0 (0 to 0) | 0 (0 to 0) | -2% (-7.8% to 3.1%)       |
| Bosnia and Herzegovina | Unintentional firearm injuries                  | 0 (0 to 0) | 0 (0 to 0) | -19.8% (-28.1% to -12.3%) |
| Bosnia and Herzegovina | Venomous animal contact                         | 0 (0 to 0) | 0 (0 to 0) | -31.3% (-35.6% to -26.7%) |
| Botswana               | Adverse effects of medical treatment            | 0 (0 to 0) | 0 (0 to 0) | 0% (0% to 0%)             |
| Botswana               | Conflict and terrorism                          | 0 (0 to 0) | 0 (0 to 0) | NA                        |
| Botswana               | Cyclist road injuries                           | 1 (0 to 1) | 1 (0 to 1) | 25.7% (16.9% to 34.9%)    |
| Botswana               | Drowning                                        | 0 (0 to 0) | 0 (0 to 0) | 17.5% (6.3% to 28.4%)     |
| Botswana               | Environmental heat and cold exposure            | 0 (0 to 0) | 0 (0 to 0) | -10.9% (-16.5% to -5.1%)  |
| Botswana               | Executions and police conflict                  | 0 (0 to 0) | 0 (0 to 0) | NA                        |
| Botswana               | Exposure to forces of nature                    | 0 (0 to 0) | 0 (0 to 0) | NA                        |
| Botswana               | Falls                                           | 3 (2 to 4) | 3 (2 to 5) | 17.5% (13.6% to 22.2%)    |
| Botswana               | Fire, heat, and hot substances                  | 0 (0 to 0) | 0 (0 to 0) | -3.9% (-9.3% to 2.1%)     |
| Botswana               | Foreign body in eyes                            | 0 (0 to 0) | 0 (0 to 0) | 0% (0% to 0%)             |
| Botswana               | Foreign body in other body part                 | 1 (1 to 1) | 1 (0 to 1) | -3.7% (-7.3% to 0.2%)     |
| Botswana               | Motor vehicle road injuries                     | 1 (0 to 2) | 1 (1 to 2) | 33.3% (23.4% to 44.4%)    |
| Botswana               | Motorcyclist road injuries                      | 0 (0 to 0) | 0 (0 to 0) | 1.5% (-9.4% to 11.9%)     |
| Botswana               | Non-venomous animal contact                     | 0 (0 to 1) | 0 (0 to 0) | -24.1% (-27.7% to -20.8%) |
| Botswana               | Other exposure to mechanical forces             | 0 (0 to 1) | 0 (0 to 0) | -15.5% (-20.3% to -10.7%) |
| Botswana               | Other road injuries                             | 0 (0 to 0) | 0 (0 to 0) | 30.5% (19.1% to 42.6%)    |
| Botswana               | Other transport injuries                        | 0 (0 to 1) | 0 (0 to 0) | -9% (-12.9% to -4.7%)     |
| Botswana               | Other unintentional injuries                    | 0 (0 to 0) | 0 (0 to 0) | -18.4% (-22.2% to -14%)   |
| Botswana               | Pedestrian road injuries                        | 1 (1 to 2) | 2 (1 to 3) | 12.9% (4.7% to 20.9%)     |
| Botswana               | Physical violence by firearm                    | 0 (0 to 0) | 0 (0 to 0) | 277.1% (214.3% to 364%)   |
| Botswana               | Physical violence by other means                | 0 (0 to 0) | 0 (0 to 1) | 156% (122.9% to 199.9%)   |
| Botswana               | Physical violence by sharp object               | 0 (0 to 0) | 0 (0 to 0) | 178.3% (138.9% to 223.3%) |
| Botswana               | Poisoning by carbon monoxide                    | 0 (0 to 0) | 0 (0 to 0) | 17.5% (3.4% to 33.8%)     |
| Botswana               | Poisoning by other means                        | 0 (0 to 0) | 0 (0 to 0) | -14.2% (-21.5% to -7.9%)  |
| Botswana               | Pulmonary aspiration and foreign body in airway | 0 (0 to 0) | 0 (0 to 0) | -15.2% (-21.5% to -8.3%)  |
| Botswana               | Self-harm by firearm                            | 0 (0 to 0) | 0 (0 to 0) | 31.3% (17.8% to 49.1%)    |
| Botswana               | Self-harm by other specified means              | 0 (0 to 0) | 0 (0 to 0) | 20.2% (14.1% to 25.9%)    |
| Botswana               | Unintentional firearm injuries                  | 0 (0 to 0) | 0 (0 to 0) | -17.5% (-26% to -9%)      |
| Botswana               | Venomous animal contact                         | 0 (0 to 0) | 0 (0 to 0) | -26.5% (-32.3% to -20.4%) |
| Brazil                 | Adverse effects of medical treatment            | 0 (0 to 0) | 0 (0 to 0) | 0% (0% to 0%)             |
| Brazil                 | Conflict and terrorism                          | 0 (0 to 0) | 0 (0 to 0) | NA                        |

|                   |                                                 |              |              |                           |
|-------------------|-------------------------------------------------|--------------|--------------|---------------------------|
| Brazil            | Cyclist road injuries                           | 0 (0 to 1)   | 0 (0 to 0)   | -34.6% (-44.8% to -22.7%) |
| Brazil            | Drowning                                        | 0 (0 to 0)   | 0 (0 to 0)   | -39.9% (-43.8% to -35.5%) |
| Brazil            | Environmental heat and cold exposure            | 0 (0 to 1)   | 0 (0 to 1)   | -13.1% (-17.7% to -7.1%)  |
| Brazil            | Executions and police conflict                  | 0 (0 to 0)   | 0 (0 to 0)   | NA                        |
| Brazil            | Exposure to forces of nature                    | 0 (0 to 0)   | 0 (0 to 0)   | NA                        |
| Brazil            | Falls                                           | 10 (7 to 14) | 10 (7 to 14) | 0.8% (-1.7% to 3.4%)      |
| Brazil            | Fire, heat, and hot substances                  | 0 (0 to 0)   | 0 (0 to 0)   | -55.4% (-57.6% to -53%)   |
| Brazil            | Foreign body in eyes                            | 0 (0 to 0)   | 0 (0 to 0)   | 0% (0% to 0%)             |
| Brazil            | Foreign body in other body part                 | 0 (0 to 0)   | 0 (0 to 0)   | -60.6% (-64.6% to -53.7%) |
| Brazil            | Motor vehicle road injuries                     | 0 (0 to 1)   | 0 (0 to 0)   | -52.3% (-61% to -42.5%)   |
| Brazil            | Motorcyclist road injuries                      | 0 (0 to 1)   | 1 (1 to 2)   | 167.3% (121.7% to 234.5%) |
| Brazil            | Non-venomous animal contact                     | 0 (0 to 0)   | 0 (0 to 0)   | -54.8% (-57.6% to -51%)   |
| Brazil            | Other exposure to mechanical forces             | 0 (0 to 1)   | 0 (0 to 1)   | -24.2% (-28.1% to -17.6%) |
| Brazil            | Other road injuries                             | 0 (0 to 0)   | 0 (0 to 0)   | 38.7% (18.6% to 62.9%)    |
| Brazil            | Other transport injuries                        | 0 (0 to 0)   | 0 (0 to 0)   | -54.1% (-55.9% to -52.3%) |
| Brazil            | Other unintentional injuries                    | 1 (1 to 2)   | 1 (0 to 1)   | -29.5% (-32% to -26.7%)   |
| Brazil            | Pedestrian road injuries                        | 1 (1 to 3)   | 1 (0 to 1)   | -45% (-53.4% to -35.8%)   |
| Brazil            | Physical violence by firearm                    | 0 (0 to 0)   | 0 (0 to 0)   | 74.2% (42.9% to 124.6%)   |
| Brazil            | Physical violence by other means                | 0 (0 to 1)   | 0 (0 to 0)   | -38.4% (-46.7% to -30.4%) |
| Brazil            | Physical violence by sharp object               | 0 (0 to 0)   | 0 (0 to 0)   | -42.8% (-52.6% to -33.7%) |
| Brazil            | Poisoning by carbon monoxide                    | 0 (0 to 0)   | 0 (0 to 0)   | -25.7% (-38.9% to -3.2%)  |
| Brazil            | Poisoning by other means                        | 0 (0 to 0)   | 0 (0 to 0)   | -47.3% (-52.7% to -40.4%) |
| Brazil            | Pulmonary aspiration and foreign body in airway | 0 (0 to 0)   | 0 (0 to 0)   | -45.7% (-51% to -41.2%)   |
| Brazil            | Self-harm by firearm                            | 0 (0 to 0)   | 0 (0 to 0)   | 36.8% (13.3% to 73.4%)    |
| Brazil            | Self-harm by other specified means              | 0 (0 to 0)   | 0 (0 to 0)   | -39.1% (-51.4% to -28.9%) |
| Brazil            | Unintentional firearm injuries                  | 0 (0 to 0)   | 0 (0 to 0)   | -56.6% (-61.1% to -52.1%) |
| Brazil            | Venomous animal contact                         | 0 (0 to 0)   | 0 (0 to 0)   | -53.8% (-57% to -48.4%)   |
| Brunei Darussalam | Adverse effects of medical treatment            | 0 (0 to 0)   | 0 (0 to 0)   | 0% (0% to 0%)             |
| Brunei Darussalam | Conflict and terrorism                          | 0 (0 to 0)   | 0 (0 to 0)   | NA                        |
| Brunei Darussalam | Cyclist road injuries                           | 0 (0 to 1)   | 0 (0 to 0)   | -23.1% (-30.3% to -15.6%) |
| Brunei Darussalam | Drowning                                        | 0 (0 to 0)   | 0 (0 to 0)   | 35.2% (24.8% to 46.3%)    |
| Brunei Darussalam | Environmental heat and cold exposure            | 0 (0 to 0)   | 0 (0 to 0)   | 5.2% (1% to 9.3%)         |
| Brunei Darussalam | Executions and police conflict                  | 0 (0 to 0)   | 0 (0 to 0)   | NA                        |
| Brunei Darussalam | Exposure to forces of nature                    | 0 (0 to 0)   | 0 (0 to 0)   | NA                        |
| Brunei Darussalam | Falls                                           | 4 (3 to 5)   | 4 (3 to 5)   | 9.6% (5.6% to 13.7%)      |
| Brunei Darussalam | Fire, heat, and hot substances                  | 0 (0 to 0)   | 0 (0 to 0)   | -23.1% (-27.5% to -18.5%) |
| Brunei Darussalam | Foreign body in eyes                            | 0 (0 to 0)   | 0 (0 to 0)   | 0% (0% to 0%)             |
| Brunei Darussalam | Foreign body in other body part                 | 0 (0 to 1)   | 0 (0 to 1)   | 6% (2.1% to 10.5%)        |
| Brunei Darussalam | Motor vehicle road injuries                     | 1 (1 to 2)   | 1 (0 to 1)   | -46.5% (-50.9% to -42.5%) |
| Brunei Darussalam | Motorcyclist road injuries                      | 0 (0 to 0)   | 0 (0 to 0)   | -30.3% (-38.5% to -21.1%) |
| Brunei Darussalam | Non-venomous animal contact                     | 0 (0 to 0)   | 0 (0 to 0)   | -10.7% (-14.4% to -6.7%)  |
| Brunei Darussalam | Other exposure to mechanical forces             | 1 (0 to 2)   | 1 (0 to 1)   | -7.5% (-11.9% to -2.9%)   |
| Brunei Darussalam | Other road injuries                             | 0 (0 to 0)   | 0 (0 to 0)   | -32.4% (-39.4% to -25.4%) |

|                   |                                                 |            |            |                           |
|-------------------|-------------------------------------------------|------------|------------|---------------------------|
| Brunei Darussalam | Other transport injuries                        | 0 (0 to 1) | 0 (0 to 0) | -51.5% (-56.6% to -44.9%) |
| Brunei Darussalam | Other unintentional injuries                    | 0 (0 to 1) | 0 (0 to 1) | -21.4% (-26.1% to -16.9%) |
| Brunei Darussalam | Pedestrian road injuries                        | 0 (0 to 0) | 0 (0 to 0) | -26.4% (-33.2% to -18.3%) |
| Brunei Darussalam | Physical violence by firearm                    | 0 (0 to 0) | 0 (0 to 0) | 60.3% (40.3% to 88.6%)    |
| Brunei Darussalam | Physical violence by other means                | 0 (0 to 0) | 0 (0 to 0) | -24.8% (-32% to -18%)     |
| Brunei Darussalam | Physical violence by sharp object               | 0 (0 to 0) | 0 (0 to 0) | -27.1% (-37.7% to -17.4%) |
| Brunei Darussalam | Poisoning by carbon monoxide                    | 0 (0 to 0) | 0 (0 to 0) | -3.8% (-12.9% to 7.4%)    |
| Brunei Darussalam | Poisoning by other means                        | 0 (0 to 0) | 0 (0 to 0) | -21.5% (-27.7% to -14.5%) |
| Brunei Darussalam | Pulmonary aspiration and foreign body in airway | 0 (0 to 0) | 0 (0 to 0) | 1.1% (-5.7% to 8%)        |
| Brunei Darussalam | Self-harm by firearm                            | 0 (0 to 0) | 0 (0 to 0) | 4.8% (-10.6% to 19.5%)    |
| Brunei Darussalam | Self-harm by other specified means              | 0 (0 to 0) | 0 (0 to 0) | 10.3% (3.3% to 17%)       |
| Brunei Darussalam | Unintentional firearm injuries                  | 0 (0 to 0) | 0 (0 to 0) | -6.7% (-13.9% to 1.1%)    |
| Brunei Darussalam | Venomous animal contact                         | 0 (0 to 0) | 0 (0 to 0) | -6.3% (-11.8% to -0.1%)   |
| Bulgaria          | Adverse effects of medical treatment            | 0 (0 to 0) | 0 (0 to 0) | 0% (0% to 0%)             |
| Bulgaria          | Conflict and terrorism                          | 0 (0 to 0) | 0 (0 to 0) | NA                        |
| Bulgaria          | Cyclist road injuries                           | 1 (0 to 1) | 1 (0 to 1) | -11.6% (-21.9% to -0.7%)  |
| Bulgaria          | Drowning                                        | 0 (0 to 0) | 0 (0 to 0) | 36.7% (19.2% to 52.7%)    |
| Bulgaria          | Environmental heat and cold exposure            | 0 (0 to 0) | 0 (0 to 0) | -10.9% (-16% to -6.2%)    |
| Bulgaria          | Executions and police conflict                  | 0 (0 to 0) | 0 (0 to 0) | NA                        |
| Bulgaria          | Exposure to forces of nature                    | 0 (0 to 0) | 0 (0 to 0) | NA                        |
| Bulgaria          | Falls                                           | 5 (4 to 7) | 5 (4 to 7) | 0.5% (-4.1% to 5%)        |
| Bulgaria          | Fire, heat, and hot substances                  | 0 (0 to 0) | 0 (0 to 0) | -7.9% (-13.5% to -2.2%)   |
| Bulgaria          | Foreign body in eyes                            | 0 (0 to 0) | 0 (0 to 0) | 0% (0% to 0%)             |
| Bulgaria          | Foreign body in other body part                 | 0 (0 to 0) | 0 (0 to 0) | -0.2% (-4.7% to 3.8%)     |
| Bulgaria          | Motor vehicle road injuries                     | 2 (1 to 3) | 2 (1 to 3) | -4.6% (-16.9% to 8.4%)    |
| Bulgaria          | Motorcyclist road injuries                      | 0 (0 to 1) | 0 (0 to 0) | -18.8% (-31.3% to -4.2%)  |
| Bulgaria          | Non-venomous animal contact                     | 0 (0 to 0) | 0 (0 to 0) | -10.3% (-13.7% to -6.6%)  |
| Bulgaria          | Other exposure to mechanical forces             | 2 (1 to 3) | 2 (1 to 3) | 9.9% (4.4% to 15.9%)      |
| Bulgaria          | Other road injuries                             | 0 (0 to 0) | 0 (0 to 0) | -13.6% (-24% to -2%)      |
| Bulgaria          | Other transport injuries                        | 0 (0 to 0) | 0 (0 to 0) | -22.6% (-27.8% to -17.4%) |
| Bulgaria          | Other unintentional injuries                    | 1 (0 to 1) | 0 (0 to 0) | -51.9% (-57.2% to -45.5%) |
| Bulgaria          | Pedestrian road injuries                        | 1 (0 to 1) | 0 (0 to 0) | -52.2% (-59.9% to -45.1%) |
| Bulgaria          | Physical violence by firearm                    | 0 (0 to 0) | 0 (0 to 0) | -14.2% (-30.3% to 2.9%)   |
| Bulgaria          | Physical violence by other means                | 1 (0 to 1) | 0 (0 to 1) | -34.6% (-43.3% to -25.3%) |
| Bulgaria          | Physical violence by sharp object               | 0 (0 to 0) | 0 (0 to 0) | -48.4% (-57.7% to -39%)   |
| Bulgaria          | Poisoning by carbon monoxide                    | 0 (0 to 0) | 0 (0 to 0) | 21.5% (4.6% to 38.2%)     |
| Bulgaria          | Poisoning by other means                        | 0 (0 to 0) | 0 (0 to 0) | -6.7% (-17.9% to 4.9%)    |
| Bulgaria          | Pulmonary aspiration and foreign body in airway | 0 (0 to 0) | 0 (0 to 0) | -24.5% (-32.7% to -16.8%) |
| Bulgaria          | Self-harm by firearm                            | 0 (0 to 0) | 0 (0 to 0) | -10.4% (-22.2% to 8.5%)   |
| Bulgaria          | Self-harm by other specified means              | 0 (0 to 1) | 0 (0 to 0) | -39.8% (-43.9% to -35.1%) |
| Bulgaria          | Unintentional firearm injuries                  | 0 (0 to 0) | 0 (0 to 0) | -5.1% (-13.9% to 3.6%)    |
| Bulgaria          | Venomous animal contact                         | 0 (0 to 0) | 0 (0 to 0) | -12.4% (-16.9% to -7.2%)  |
| Burkina Faso      | Adverse effects of medical treatment            | 0 (0 to 0) | 0 (0 to 0) | 0% (0% to 0%)             |

|              |                                                 |            |            |                           |
|--------------|-------------------------------------------------|------------|------------|---------------------------|
| Burkina Faso | Conflict and terrorism                          | 0 (0 to 0) | 1 (0 to 3) | NA                        |
| Burkina Faso | Cyclist road injuries                           | 1 (1 to 2) | 2 (1 to 3) | 29.5% (20.5% to 39.2%)    |
| Burkina Faso | Drowning                                        | 0 (0 to 0) | 0 (0 to 0) | -5.7% (-12% to 1.3%)      |
| Burkina Faso | Environmental heat and cold exposure            | 0 (0 to 0) | 0 (0 to 0) | -0.2% (-4.8% to 5.3%)     |
| Burkina Faso | Executions and police conflict                  | 0 (0 to 0) | 1 (0 to 1) | NA                        |
| Burkina Faso | Exposure to forces of nature                    | 0 (0 to 0) | 0 (0 to 0) | NA                        |
| Burkina Faso | Falls                                           | 3 (2 to 4) | 3 (2 to 5) | 18.7% (14.5% to 23.4%)    |
| Burkina Faso | Fire, heat, and hot substances                  | 0 (0 to 0) | 0 (0 to 0) | -2.7% (-8.2% to 2.5%)     |
| Burkina Faso | Foreign body in eyes                            | 0 (0 to 0) | 0 (0 to 0) | 0% (0% to 0%)             |
| Burkina Faso | Foreign body in other body part                 | 1 (0 to 1) | 1 (0 to 1) | -1.9% (-4.9% to 1.4%)     |
| Burkina Faso | Motor vehicle road injuries                     | 1 (1 to 3) | 2 (1 to 3) | 16.6% (7.8% to 26.8%)     |
| Burkina Faso | Motorcyclist road injuries                      | 1 (0 to 2) | 1 (1 to 2) | 38.4% (28.5% to 50%)      |
| Burkina Faso | Non-venomous animal contact                     | 0 (0 to 0) | 0 (0 to 0) | -13.7% (-17.4% to -9.5%)  |
| Burkina Faso | Other exposure to mechanical forces             | 0 (0 to 0) | 0 (0 to 0) | -2.1% (-6.8% to 3.2%)     |
| Burkina Faso | Other road injuries                             | 0 (0 to 0) | 0 (0 to 0) | 6.7% (-2% to 16.8%)       |
| Burkina Faso | Other transport injuries                        | 0 (0 to 1) | 0 (0 to 1) | -3.6% (-7.4% to 0.4%)     |
| Burkina Faso | Other unintentional injuries                    | 0 (0 to 0) | 0 (0 to 0) | -9.6% (-13.7% to -5%)     |
| Burkina Faso | Pedestrian road injuries                        | 2 (1 to 3) | 2 (1 to 4) | 5.7% (-1.2% to 12.8%)     |
| Burkina Faso | Physical violence by firearm                    | 0 (0 to 0) | 0 (0 to 0) | 25.3% (11.8% to 43.1%)    |
| Burkina Faso | Physical violence by other means                | 0 (0 to 0) | 0 (0 to 0) | 3.7% (-1.4% to 9.1%)      |
| Burkina Faso | Physical violence by sharp object               | 0 (0 to 0) | 0 (0 to 0) | 4.2% (-2.4% to 11.7%)     |
| Burkina Faso | Poisoning by carbon monoxide                    | 0 (0 to 0) | 0 (0 to 0) | 6.7% (-3.2% to 17.5%)     |
| Burkina Faso | Poisoning by other means                        | 0 (0 to 0) | 0 (0 to 0) | -14.2% (-19.9% to -8.1%)  |
| Burkina Faso | Pulmonary aspiration and foreign body in airway | 0 (0 to 0) | 0 (0 to 0) | -7.8% (-15.7% to 0%)      |
| Burkina Faso | Self-harm by firearm                            | 0 (0 to 0) | 0 (0 to 0) | 16% (3.4% to 31.6%)       |
| Burkina Faso | Self-harm by other specified means              | 0 (0 to 0) | 0 (0 to 0) | 12% (7.1% to 17%)         |
| Burkina Faso | Unintentional firearm injuries                  | 0 (0 to 0) | 0 (0 to 0) | -11.2% (-18.4% to -4.7%)  |
| Burkina Faso | Venomous animal contact                         | 0 (0 to 0) | 0 (0 to 0) | -14.2% (-20.2% to -7.7%)  |
| Burundi      | Adverse effects of medical treatment            | 0 (0 to 0) | 0 (0 to 0) | 0% (0% to 0%)             |
| Burundi      | Conflict and terrorism                          | 0 (0 to 0) | 0 (0 to 1) | NA                        |
| Burundi      | Cyclist road injuries                           | 1 (0 to 1) | 1 (0 to 1) | -19.8% (-26% to -14%)     |
| Burundi      | Drowning                                        | 0 (0 to 0) | 0 (0 to 0) | -21.9% (-27.5% to -16.2%) |
| Burundi      | Environmental heat and cold exposure            | 0 (0 to 0) | 0 (0 to 0) | -11% (-16% to -5.9%)      |
| Burundi      | Executions and police conflict                  | 0 (0 to 0) | 0 (0 to 0) | NA                        |
| Burundi      | Exposure to forces of nature                    | 0 (0 to 0) | 0 (0 to 0) | NA                        |
| Burundi      | Falls                                           | 1 (1 to 2) | 1 (1 to 2) | 5.4% (0.3% to 10.5%)      |
| Burundi      | Fire, heat, and hot substances                  | 0 (0 to 0) | 0 (0 to 0) | -17.4% (-22.1% to -12.5%) |
| Burundi      | Foreign body in eyes                            | 0 (0 to 0) | 0 (0 to 0) | 0% (0% to 0%)             |
| Burundi      | Foreign body in other body part                 | 0 (0 to 1) | 0 (0 to 1) | 1.8% (-2.5% to 6%)        |
| Burundi      | Motor vehicle road injuries                     | 1 (0 to 1) | 1 (0 to 1) | -5.5% (-12.4% to 2.2%)    |
| Burundi      | Motorcyclist road injuries                      | 0 (0 to 0) | 0 (0 to 0) | -7% (-14.4% to 0.9%)      |
| Burundi      | Non-venomous animal contact                     | 0 (0 to 1) | 0 (0 to 1) | -10.9% (-15.1% to -6.4%)  |
| Burundi      | Other exposure to mechanical forces             | 0 (0 to 0) | 0 (0 to 0) | -7.2% (-13.2% to -1%)     |



|            |                                                 |            |            |                           |
|------------|-------------------------------------------------|------------|------------|---------------------------|
| Burundi    | Other road injuries                             | 0 (0 to 0) | 0 (0 to 0) | 15.7% (6% to 26.2%)       |
| Burundi    | Other transport injuries                        | 0 (0 to 0) | 0 (0 to 0) | -9.2% (-14.1% to -4%)     |
| Burundi    | Other unintentional injuries                    | 0 (0 to 0) | 0 (0 to 0) | -23.4% (-27.5% to -19%)   |
| Burundi    | Pedestrian road injuries                        | 1 (0 to 1) | 1 (0 to 1) | -15.1% (-21.1% to -8.2%)  |
| Burundi    | Physical violence by firearm                    | 0 (0 to 0) | 0 (0 to 0) | 19.2% (8.9% to 32.9%)     |
| Burundi    | Physical violence by other means                | 0 (0 to 0) | 0 (0 to 0) | -0.4% (-6.4% to 6.4%)     |
| Burundi    | Physical violence by sharp object               | 0 (0 to 0) | 0 (0 to 0) | 0.7% (-5% to 7.3%)        |
| Burundi    | Poisoning by carbon monoxide                    | 0 (0 to 0) | 0 (0 to 0) | 9.8% (-0.3% to 21.9%)     |
| Burundi    | Poisoning by other means                        | 0 (0 to 0) | 0 (0 to 0) | -22.1% (-27.6% to -15.7%) |
| Burundi    | Pulmonary aspiration and foreign body in airway | 0 (0 to 0) | 0 (0 to 0) | -4.2% (-14.8% to 9.6%)    |
| Burundi    | Self-harm by firearm                            | 0 (0 to 0) | 0 (0 to 0) | -0.6% (-11.7% to 15%)     |
| Burundi    | Self-harm by other specified means              | 0 (0 to 0) | 0 (0 to 0) | -27.5% (-31.2% to -23.8%) |
| Burundi    | Unintentional firearm injuries                  | 0 (0 to 0) | 0 (0 to 0) | -13.6% (-20.3% to -7.8%)  |
| Burundi    | Venomous animal contact                         | 0 (0 to 0) | 0 (0 to 0) | -20.8% (-27.5% to -14.1%) |
| Cabo Verde | Adverse effects of medical treatment            | 0 (0 to 0) | 0 (0 to 0) | 0% (0% to 0%)             |
| Cabo Verde | Conflict and terrorism                          | 0 (0 to 0) | 0 (0 to 0) | NA                        |
| Cabo Verde | Cyclist road injuries                           | 1 (0 to 2) | 1 (1 to 2) | 14.3% (6% to 22.8%)       |
| Cabo Verde | Drowning                                        | 0 (0 to 0) | 0 (0 to 0) | 60.9% (46.2% to 74%)      |
| Cabo Verde | Environmental heat and cold exposure            | 0 (0 to 0) | 0 (0 to 0) | 8% (2.6% to 14.7%)        |
| Cabo Verde | Executions and police conflict                  | 0 (0 to 0) | 0 (0 to 0) | NA                        |
| Cabo Verde | Exposure to forces of nature                    | 0 (0 to 0) | 0 (0 to 0) | NA                        |
| Cabo Verde | Falls                                           | 3 (2 to 4) | 4 (3 to 5) | 46.8% (41.7% to 52.8%)    |
| Cabo Verde | Fire, heat, and hot substances                  | 0 (0 to 0) | 0 (0 to 0) | 6% (0.4% to 11.9%)        |
| Cabo Verde | Foreign body in eyes                            | 0 (0 to 0) | 0 (0 to 0) | 0% (0% to 0%)             |
| Cabo Verde | Foreign body in other body part                 | 1 (0 to 1) | 1 (0 to 1) | -2.8% (-6.1% to 0.8%)     |
| Cabo Verde | Motor vehicle road injuries                     | 1 (0 to 1) | 1 (1 to 2) | 43.2% (31.5% to 57.1%)    |
| Cabo Verde | Motorcyclist road injuries                      | 0 (0 to 1) | 1 (0 to 1) | 26.1% (16% to 36.8%)      |
| Cabo Verde | Non-venomous animal contact                     | 0 (0 to 0) | 0 (0 to 0) | -9.9% (-16.9% to -0.5%)   |
| Cabo Verde | Other exposure to mechanical forces             | 0 (0 to 0) | 0 (0 to 0) | -2.5% (-6.7% to 2.6%)     |
| Cabo Verde | Other road injuries                             | 0 (0 to 0) | 0 (0 to 0) | 2.1% (-7% to 11.9%)       |
| Cabo Verde | Other transport injuries                        | 0 (0 to 0) | 0 (0 to 1) | 8% (3.3% to 12.8%)        |
| Cabo Verde | Other unintentional injuries                    | 0 (0 to 1) | 0 (0 to 1) | -11% (-15.6% to -6.8%)    |
| Cabo Verde | Pedestrian road injuries                        | 1 (1 to 2) | 2 (1 to 3) | 27.9% (18.9% to 37.4%)    |
| Cabo Verde | Physical violence by firearm                    | 0 (0 to 0) | 0 (0 to 0) | 106.8% (86.5% to 137.2%)  |
| Cabo Verde | Physical violence by other means                | 0 (0 to 1) | 0 (0 to 1) | 11.7% (3.7% to 20.4%)     |
| Cabo Verde | Physical violence by sharp object               | 0 (0 to 0) | 0 (0 to 0) | 16.1% (6.9% to 26%)       |
| Cabo Verde | Poisoning by carbon monoxide                    | 0 (0 to 0) | 0 (0 to 0) | 28.9% (15.8% to 43.2%)    |
| Cabo Verde | Poisoning by other means                        | 0 (0 to 0) | 0 (0 to 0) | -8.8% (-14.4% to -3.2%)   |
| Cabo Verde | Pulmonary aspiration and foreign body in airway | 0 (0 to 0) | 0 (0 to 0) | -19.3% (-26.6% to -12.4%) |
| Cabo Verde | Self-harm by firearm                            | 0 (0 to 0) | 0 (0 to 0) | 31.8% (16.3% to 51.5%)    |
| Cabo Verde | Self-harm by other specified means              | 0 (0 to 0) | 0 (0 to 0) | 35.2% (26.6% to 45.7%)    |
| Cabo Verde | Unintentional firearm injuries                  | 0 (0 to 0) | 0 (0 to 0) | -10.3% (-17.4% to -3.1%)  |
| Cabo Verde | Venomous animal contact                         | 0 (0 to 0) | 0 (0 to 0) | -18.5% (-26% to -9%)      |

|          |                                                 |            |            |                           |
|----------|-------------------------------------------------|------------|------------|---------------------------|
| Cambodia | Adverse effects of medical treatment            | 0 (0 to 0) | 0 (0 to 0) | 0% (0% to 0%)             |
| Cambodia | Conflict and terrorism                          | 2 (0 to 5) | 0 (0 to 0) | NA                        |
| Cambodia | Cyclist road injuries                           | 0 (0 to 0) | 0 (0 to 0) | 12.4% (1.7% to 22.6%)     |
| Cambodia | Drowning                                        | 0 (0 to 0) | 0 (0 to 0) | -24.9% (-31.1% to -17.5%) |
| Cambodia | Environmental heat and cold exposure            | 0 (0 to 0) | 0 (0 to 0) | 5.5% (1.1% to 9.8%)       |
| Cambodia | Executions and police conflict                  | 0 (0 to 0) | 0 (0 to 0) | NA                        |
| Cambodia | Exposure to forces of nature                    | 0 (0 to 0) | 0 (0 to 0) | NA                        |
| Cambodia | Falls                                           | 2 (1 to 2) | 3 (2 to 4) | 76.5% (70.1% to 83.1%)    |
| Cambodia | Fire, heat, and hot substances                  | 0 (0 to 0) | 0 (0 to 0) | -24.5% (-30.2% to -18.5%) |
| Cambodia | Foreign body in eyes                            | 0 (0 to 0) | 0 (0 to 0) | 0% (0% to 0%)             |
| Cambodia | Foreign body in other body part                 | 0 (0 to 0) | 0 (0 to 0) | -2.5% (-6.2% to 1.6%)     |
| Cambodia | Motor vehicle road injuries                     | 0 (0 to 1) | 0 (0 to 1) | -3.8% (-11.7% to 4.9%)    |
| Cambodia | Motorcyclist road injuries                      | 1 (0 to 1) | 1 (0 to 1) | 2% (-7.2% to 12.1%)       |
| Cambodia | Non-venomous animal contact                     | 0 (0 to 0) | 0 (0 to 0) | -26.1% (-30% to -22.1%)   |
| Cambodia | Other exposure to mechanical forces             | 0 (0 to 0) | 0 (0 to 0) | -11.3% (-17.2% to -5.5%)  |
| Cambodia | Other road injuries                             | 0 (0 to 0) | 0 (0 to 0) | 6.7% (-4.3% to 18.4%)     |
| Cambodia | Other transport injuries                        | 0 (0 to 0) | 0 (0 to 0) | -18.1% (-23.3% to -12.3%) |
| Cambodia | Other unintentional injuries                    | 0 (0 to 0) | 0 (0 to 0) | 4% (-2.7% to 11.3%)       |
| Cambodia | Pedestrian road injuries                        | 0 (0 to 0) | 0 (0 to 0) | -11.1% (-19.1% to -3.4%)  |
| Cambodia | Physical violence by firearm                    | 0 (0 to 0) | 0 (0 to 0) | 21% (5.9% to 38.4%)       |
| Cambodia | Physical violence by other means                | 0 (0 to 0) | 0 (0 to 0) | -3.5% (-10.8% to 4.4%)    |
| Cambodia | Physical violence by sharp object               | 0 (0 to 0) | 0 (0 to 0) | -5.4% (-14.6% to 4.1%)    |
| Cambodia | Poisoning by carbon monoxide                    | 0 (0 to 0) | 0 (0 to 0) | 48.1% (32.2% to 65.7%)    |
| Cambodia | Poisoning by other means                        | 0 (0 to 0) | 0 (0 to 0) | -7.7% (-15.6% to -0.1%)   |
| Cambodia | Pulmonary aspiration and foreign body in airway | 0 (0 to 0) | 0 (0 to 0) | -24.9% (-31.6% to -17.2%) |
| Cambodia | Self-harm by firearm                            | 0 (0 to 0) | 0 (0 to 0) | 67.3% (43.6% to 101.6%)   |
| Cambodia | Self-harm by other specified means              | 0 (0 to 0) | 0 (0 to 0) | -15.3% (-20.3% to -9.3%)  |
| Cambodia | Unintentional firearm injuries                  | 0 (0 to 0) | 0 (0 to 0) | -13% (-20% to -6.5%)      |
| Cambodia | Venomous animal contact                         | 0 (0 to 0) | 0 (0 to 0) | -15.6% (-21.6% to -8.9%)  |
| Cameroon | Adverse effects of medical treatment            | 0 (0 to 0) | 0 (0 to 0) | 0% (0% to 0%)             |
| Cameroon | Conflict and terrorism                          | 0 (0 to 0) | 1 (0 to 2) | NA                        |
| Cameroon | Cyclist road injuries                           | 1 (1 to 3) | 2 (1 to 3) | 22% (13.7% to 31.5%)      |
| Cameroon | Drowning                                        | 0 (0 to 0) | 0 (0 to 0) | -1.4% (-8.7% to 6.1%)     |
| Cameroon | Environmental heat and cold exposure            | 0 (0 to 0) | 0 (0 to 0) | -1.6% (-6.1% to 3.7%)     |
| Cameroon | Executions and police conflict                  | 0 (0 to 0) | 0 (0 to 0) | NA                        |
| Cameroon | Exposure to forces of nature                    | 0 (0 to 0) | 0 (0 to 0) | NA                        |
| Cameroon | Falls                                           | 3 (2 to 4) | 3 (2 to 5) | 19.3% (15% to 23.6%)      |
| Cameroon | Fire, heat, and hot substances                  | 0 (0 to 0) | 0 (0 to 0) | -6.5% (-11.7% to -1.3%)   |
| Cameroon | Foreign body in eyes                            | 0 (0 to 0) | 0 (0 to 0) | 0% (0% to 0%)             |
| Cameroon | Foreign body in other body part                 | 1 (0 to 1) | 1 (0 to 1) | 4.2% (0.3% to 8.3%)       |
| Cameroon | Motor vehicle road injuries                     | 2 (1 to 4) | 2 (1 to 4) | 10.8% (2.1% to 20.4%)     |
| Cameroon | Motorcyclist road injuries                      | 2 (1 to 3) | 2 (1 to 3) | 0.8% (-6.1% to 8.4%)      |
| Cameroon | Non-venomous animal contact                     | 0 (0 to 0) | 0 (0 to 0) | -1.1% (-5.2% to 3.6%)     |

|          |                                                 |            |            |                           |
|----------|-------------------------------------------------|------------|------------|---------------------------|
| Cameroon | Other exposure to mechanical forces             | 0 (0 to 0) | 0 (0 to 0) | -13% (-18.1% to -7.7%)    |
| Cameroon | Other road injuries                             | 0 (0 to 0) | 0 (0 to 0) | 22.3% (11.7% to 33.3%)    |
| Cameroon | Other transport injuries                        | 0 (0 to 0) | 0 (0 to 0) | -5% (-9% to -0.6%)        |
| Cameroon | Other unintentional injuries                    | 0 (0 to 0) | 0 (0 to 0) | -12% (-16.6% to -6.8%)    |
| Cameroon | Pedestrian road injuries                        | 1 (1 to 3) | 1 (1 to 3) | 4% (-3.8% to 12.2%)       |
| Cameroon | Physical violence by firearm                    | 0 (0 to 0) | 0 (0 to 0) | 29.6% (13.2% to 47.8%)    |
| Cameroon | Physical violence by other means                | 0 (0 to 0) | 0 (0 to 0) | -4.1% (-9.3% to 1%)       |
| Cameroon | Physical violence by sharp object               | 0 (0 to 0) | 0 (0 to 0) | 0.9% (-6.5% to 8.8%)      |
| Cameroon | Poisoning by carbon monoxide                    | 0 (0 to 0) | 0 (0 to 0) | 14.5% (1.1% to 28.3%)     |
| Cameroon | Poisoning by other means                        | 0 (0 to 0) | 0 (0 to 0) | -15% (-22.1% to -7.4%)    |
| Cameroon | Pulmonary aspiration and foreign body in airway | 0 (0 to 0) | 0 (0 to 0) | 4.8% (-4.1% to 15%)       |
| Cameroon | Self-harm by firearm                            | 0 (0 to 0) | 0 (0 to 0) | 32.6% (19% to 48%)        |
| Cameroon | Self-harm by other specified means              | 0 (0 to 0) | 0 (0 to 0) | 26.1% (19.3% to 33.7%)    |
| Cameroon | Unintentional firearm injuries                  | 0 (0 to 0) | 0 (0 to 0) | -14.1% (-22.1% to -6.1%)  |
| Cameroon | Venomous animal contact                         | 0 (0 to 0) | 0 (0 to 0) | -2.3% (-8.9% to 5.1%)     |
| Canada   | Adverse effects of medical treatment            | 0 (0 to 0) | 0 (0 to 0) | 0% (0% to 0%)             |
| Canada   | Conflict and terrorism                          | 0 (0 to 0) | 0 (0 to 0) | NA                        |
| Canada   | Cyclist road injuries                           | 0 (0 to 0) | 0 (0 to 0) | -8.8% (-22.4% to 6.9%)    |
| Canada   | Drowning                                        | 0 (0 to 0) | 0 (0 to 0) | 38% (22.9% to 56.2%)      |
| Canada   | Environmental heat and cold exposure            | 0 (0 to 0) | 0 (0 to 0) | -9.4% (-14.6% to -4.7%)   |
| Canada   | Executions and police conflict                  | 0 (0 to 0) | 0 (0 to 0) | NA                        |
| Canada   | Exposure to forces of nature                    | 0 (0 to 0) | 0 (0 to 0) | NA                        |
| Canada   | Falls                                           | 4 (3 to 6) | 6 (4 to 8) | 27% (21.7% to 32.9%)      |
| Canada   | Fire, heat, and hot substances                  | 0 (0 to 0) | 0 (0 to 0) | -17.7% (-23.6% to -12.2%) |
| Canada   | Foreign body in eyes                            | 0 (0 to 0) | 0 (0 to 0) | 0% (0% to 0%)             |
| Canada   | Foreign body in other body part                 | 0 (0 to 0) | 0 (0 to 0) | 0.8% (-2.7% to 4.5%)      |
| Canada   | Motor vehicle road injuries                     | 1 (1 to 2) | 1 (0 to 1) | -38.9% (-46.6% to -29.6%) |
| Canada   | Motorcyclist road injuries                      | 0 (0 to 0) | 0 (0 to 0) | -17.2% (-33.9% to 3.4%)   |
| Canada   | Non-venomous animal contact                     | 0 (0 to 0) | 0 (0 to 0) | -4.8% (-8.5% to -0.6%)    |
| Canada   | Other exposure to mechanical forces             | 1 (0 to 1) | 0 (0 to 1) | -16.8% (-23.8% to -10.7%) |
| Canada   | Other road injuries                             | 0 (0 to 0) | 0 (0 to 0) | 24.3% (6.3% to 46.4%)     |
| Canada   | Other transport injuries                        | 1 (0 to 1) | 1 (0 to 1) | -0.9% (-4% to 2.5%)       |
| Canada   | Other unintentional injuries                    | 0 (0 to 1) | 0 (0 to 1) | -14.3% (-18.4% to -9.7%)  |
| Canada   | Pedestrian road injuries                        | 0 (0 to 0) | 0 (0 to 0) | -18.1% (-29.6% to -3.2%)  |
| Canada   | Physical violence by firearm                    | 0 (0 to 0) | 0 (0 to 0) | 36.2% (23.7% to 50.2%)    |
| Canada   | Physical violence by other means                | 0 (0 to 0) | 0 (0 to 0) | -0.6% (-9.1% to 7.2%)     |
| Canada   | Physical violence by sharp object               | 0 (0 to 0) | 0 (0 to 0) | -4% (-14.4% to 6.3%)      |
| Canada   | Poisoning by carbon monoxide                    | 0 (0 to 0) | 0 (0 to 0) | 10.2% (1.8% to 19.1%)     |
| Canada   | Poisoning by other means                        | 0 (0 to 0) | 0 (0 to 0) | -8.1% (-12.8% to -3.9%)   |
| Canada   | Pulmonary aspiration and foreign body in airway | 0 (0 to 0) | 0 (0 to 0) | -14% (-19.9% to -8.3%)    |
| Canada   | Self-harm by firearm                            | 0 (0 to 0) | 0 (0 to 0) | -37.2% (-50.9% to -24.9%) |
| Canada   | Self-harm by other specified means              | 1 (0 to 1) | 1 (0 to 1) | 5.2% (-1.5% to 11.5%)     |
| Canada   | Unintentional firearm injuries                  | 0 (0 to 0) | 0 (0 to 0) | -2.9% (-12.8% to 8.2%)    |

|                          |                                                 |             |             |                           |
|--------------------------|-------------------------------------------------|-------------|-------------|---------------------------|
| Canada                   | Venomous animal contact                         | 0 (0 to 0)  | 0 (0 to 0)  | -4.5% (-9.9% to 0.9%)     |
| Central African Republic | Adverse effects of medical treatment            | 0 (0 to 0)  | 0 (0 to 0)  | 0% (0% to 0%)             |
| Central African Republic | Conflict and terrorism                          | 0 (0 to 0)  | 3 (1 to 10) | NA                        |
| Central African Republic | Cyclist road injuries                           | 0 (0 to 0)  | 0 (0 to 0)  | 9.9% (2.6% to 19.5%)      |
| Central African Republic | Drowning                                        | 0 (0 to 0)  | 0 (0 to 0)  | -17.5% (-23.4% to -11%)   |
| Central African Republic | Environmental heat and cold exposure            | 0 (0 to 0)  | 0 (0 to 0)  | -3.4% (-7.6% to 1.1%)     |
| Central African Republic | Executions and police conflict                  | 0 (0 to 0)  | 0 (0 to 0)  | NA                        |
| Central African Republic | Exposure to forces of nature                    | 0 (0 to 0)  | 0 (0 to 0)  | NA                        |
| Central African Republic | Falls                                           | 1 (1 to 1)  | 1 (1 to 1)  | -2.5% (-6% to 1%)         |
| Central African Republic | Fire, heat, and hot substances                  | 0 (0 to 0)  | 0 (0 to 0)  | -8.5% (-12.6% to -4.1%)   |
| Central African Republic | Foreign body in eyes                            | 0 (0 to 0)  | 0 (0 to 0)  | 0% (0% to 0%)             |
| Central African Republic | Foreign body in other body part                 | 0 (0 to 1)  | 0 (0 to 1)  | -1.4% (-5.5% to 2.3%)     |
| Central African Republic | Motor vehicle road injuries                     | 0 (0 to 1)  | 1 (0 to 1)  | 0.6% (-6% to 8.1%)        |
| Central African Republic | Motorcyclist road injuries                      | 0 (0 to 0)  | 0 (0 to 0)  | 21% (9.9% to 33.9%)       |
| Central African Republic | Non-venomous animal contact                     | 0 (0 to 0)  | 0 (0 to 0)  | 1.6% (-3% to 6.9%)        |
| Central African Republic | Other exposure to mechanical forces             | 0 (0 to 0)  | 0 (0 to 0)  | -13.2% (-18.7% to -7.2%)  |
| Central African Republic | Other road injuries                             | 0 (0 to 0)  | 0 (0 to 0)  | 7.4% (-0.9% to 17.1%)     |
| Central African Republic | Other transport injuries                        | 0 (0 to 0)  | 0 (0 to 0)  | 1.7% (-2.4% to 5.9%)      |
| Central African Republic | Other unintentional injuries                    | 0 (0 to 0)  | 0 (0 to 0)  | -13% (-17.1% to -8.4%)    |
| Central African Republic | Pedestrian road injuries                        | 0 (0 to 1)  | 0 (0 to 1)  | -7.9% (-13.3% to -1.8%)   |
| Central African Republic | Physical violence by firearm                    | 0 (0 to 0)  | 0 (0 to 0)  | 117.4% (91.7% to 150.9%)  |
| Central African Republic | Physical violence by other means                | 0 (0 to 0)  | 0 (0 to 0)  | 126.4% (98.7% to 155.9%)  |
| Central African Republic | Physical violence by sharp object               | 0 (0 to 0)  | 0 (0 to 0)  | 156.3% (124.1% to 193.4%) |
| Central African Republic | Poisoning by carbon monoxide                    | 0 (0 to 0)  | 0 (0 to 0)  | 2.3% (-8% to 13%)         |
| Central African Republic | Poisoning by other means                        | 0 (0 to 0)  | 0 (0 to 0)  | -14.4% (-20% to -8.5%)    |
| Central African Republic | Pulmonary aspiration and foreign body in airway | 0 (0 to 0)  | 0 (0 to 0)  | -3.1% (-12.4% to 7%)      |
| Central African Republic | Self-harm by firearm                            | 0 (0 to 0)  | 0 (0 to 0)  | -5.7% (-15.4% to 5.8%)    |
| Central African Republic | Self-harm by other specified means              | 0 (0 to 0)  | 0 (0 to 0)  | -11.6% (-15.8% to -7.3%)  |
| Central African Republic | Unintentional firearm injuries                  | 0 (0 to 0)  | 0 (0 to 0)  | -5.3% (-10.9% to 1.5%)    |
| Central African Republic | Venomous animal contact                         | 0 (0 to 0)  | 0 (0 to 0)  | 13.7% (6.3% to 22.5%)     |
| Chad                     | Adverse effects of medical treatment            | 0 (0 to 0)  | 0 (0 to 0)  | 0% (0% to 0%)             |
| Chad                     | Conflict and terrorism                          | 3 (1 to 11) | 1 (0 to 2)  | NA                        |
| Chad                     | Cyclist road injuries                           | 1 (0 to 2)  | 1 (1 to 2)  | 21.5% (13.8% to 30.2%)    |
| Chad                     | Drowning                                        | 0 (0 to 0)  | 0 (0 to 0)  | -7.4% (-12.9% to -1.4%)   |
| Chad                     | Environmental heat and cold exposure            | 0 (0 to 0)  | 0 (0 to 0)  | 4.9% (0.2% to 10.4%)      |
| Chad                     | Executions and police conflict                  | 0 (0 to 0)  | 0 (0 to 0)  | NA                        |
| Chad                     | Exposure to forces of nature                    | 0 (0 to 0)  | 0 (0 to 0)  | NA                        |
| Chad                     | Falls                                           | 2 (2 to 3)  | 3 (2 to 4)  | 13.1% (9.2% to 16.9%)     |
| Chad                     | Fire, heat, and hot substances                  | 0 (0 to 0)  | 0 (0 to 0)  | 5.3% (0.1% to 10.9%)      |
| Chad                     | Foreign body in eyes                            | 0 (0 to 0)  | 0 (0 to 0)  | 0% (0% to 0%)             |
| Chad                     | Foreign body in other body part                 | 1 (0 to 1)  | 1 (0 to 1)  | 1.7% (-2.1% to 6.1%)      |
| Chad                     | Motor vehicle road injuries                     | 1 (1 to 3)  | 2 (1 to 3)  | 28.4% (19.5% to 38.5%)    |
| Chad                     | Motorcyclist road injuries                      | 0 (0 to 1)  | 1 (0 to 1)  | 50.4% (38.3% to 63.4%)    |

|       |                                                 |            |            |                           |
|-------|-------------------------------------------------|------------|------------|---------------------------|
| Chad  | Non-venomous animal contact                     | 0 (0 to 0) | 0 (0 to 1) | 4.6% (0.6% to 9.2%)       |
| Chad  | Other exposure to mechanical forces             | 0 (0 to 0) | 0 (0 to 0) | -2% (-6.5% to 2.9%)       |
| Chad  | Other road injuries                             | 0 (0 to 0) | 0 (0 to 0) | 11.9% (4% to 20.8%)       |
| Chad  | Other transport injuries                        | 0 (0 to 0) | 0 (0 to 0) | 0.9% (-3% to 5.6%)        |
| Chad  | Other unintentional injuries                    | 0 (0 to 1) | 0 (0 to 0) | -5.8% (-9.5% to -1.5%)    |
| Chad  | Pedestrian road injuries                        | 2 (1 to 3) | 2 (1 to 4) | 16.1% (9.2% to 22.8%)     |
| Chad  | Physical violence by firearm                    | 0 (0 to 0) | 0 (0 to 0) | 28.6% (18.1% to 39.9%)    |
| Chad  | Physical violence by other means                | 0 (0 to 0) | 0 (0 to 0) | 27.7% (20.5% to 35.6%)    |
| Chad  | Physical violence by sharp object               | 0 (0 to 0) | 0 (0 to 0) | 25.6% (16.2% to 36.2%)    |
| Chad  | Poisoning by carbon monoxide                    | 0 (0 to 0) | 0 (0 to 0) | 14% (2.2% to 27.3%)       |
| Chad  | Poisoning by other means                        | 0 (0 to 0) | 0 (0 to 0) | -5.7% (-11.6% to 1.4%)    |
| Chad  | Pulmonary aspiration and foreign body in airway | 0 (0 to 0) | 0 (0 to 0) | -5.4% (-14.6% to 3.4%)    |
| Chad  | Self-harm by firearm                            | 0 (0 to 0) | 0 (0 to 0) | 24.7% (11.3% to 40.4%)    |
| Chad  | Self-harm by other specified means              | 0 (0 to 0) | 0 (0 to 0) | 20.7% (15.7% to 26.8%)    |
| Chad  | Unintentional firearm injuries                  | 0 (0 to 0) | 0 (0 to 0) | -12.8% (-19% to -6.8%)    |
| Chad  | Venomous animal contact                         | 0 (0 to 0) | 0 (0 to 0) | 6.6% (-0.4% to 14%)       |
| Chile | Adverse effects of medical treatment            | 0 (0 to 0) | 0 (0 to 0) | 0% (0% to 0%)             |
| Chile | Conflict and terrorism                          | 0 (0 to 0) | 0 (0 to 0) | NA                        |
| Chile | Cyclist road injuries                           | 0 (0 to 0) | 0 (0 to 0) | 20% (7.7% to 35.7%)       |
| Chile | Drowning                                        | 0 (0 to 0) | 0 (0 to 0) | 82.6% (59.2% to 107%)     |
| Chile | Environmental heat and cold exposure            | 0 (0 to 0) | 0 (0 to 0) | -16.8% (-22.3% to -11.9%) |
| Chile | Executions and police conflict                  | 0 (0 to 0) | 0 (0 to 0) | NA                        |
| Chile | Exposure to forces of nature                    | 0 (0 to 0) | 0 (0 to 0) | NA                        |
| Chile | Falls                                           | 3 (2 to 4) | 4 (3 to 6) | 29.9% (25.5% to 34.3%)    |
| Chile | Fire, heat, and hot substances                  | 0 (0 to 0) | 0 (0 to 0) | -28% (-34.9% to -21.6%)   |
| Chile | Foreign body in eyes                            | 0 (0 to 0) | 0 (0 to 0) | 0% (0% to 0%)             |
| Chile | Foreign body in other body part                 | 0 (0 to 0) | 0 (0 to 0) | 3.3% (0.2% to 7.2%)       |
| Chile | Motor vehicle road injuries                     | 1 (0 to 1) | 1 (0 to 1) | 0.7% (-8.9% to 11.5%)     |
| Chile | Motorcyclist road injuries                      | 0 (0 to 0) | 0 (0 to 0) | 66.8% (44.8% to 93.2%)    |
| Chile | Non-venomous animal contact                     | 0 (0 to 0) | 0 (0 to 0) | -19.2% (-22.2% to -15.8%) |
| Chile | Other exposure to mechanical forces             | 1 (0 to 2) | 1 (0 to 2) | 6.2% (-0.8% to 13.8%)     |
| Chile | Other road injuries                             | 0 (0 to 0) | 0 (0 to 0) | 7.3% (-4% to 21.1%)       |
| Chile | Other transport injuries                        | 0 (0 to 0) | 0 (0 to 0) | -8.4% (-14% to -3.4%)     |
| Chile | Other unintentional injuries                    | 0 (0 to 1) | 0 (0 to 0) | -12.7% (-18.8% to -6.4%)  |
| Chile | Pedestrian road injuries                        | 0 (0 to 0) | 0 (0 to 0) | -24.7% (-32.6% to -15.5%) |
| Chile | Physical violence by firearm                    | 0 (0 to 0) | 0 (0 to 0) | 181.5% (125.5% to 266.5%) |
| Chile | Physical violence by other means                | 0 (0 to 1) | 0 (0 to 0) | -44.3% (-56.2% to -31.8%) |
| Chile | Physical violence by sharp object               | 0 (0 to 0) | 0 (0 to 0) | 43% (15.1% to 82.5%)      |
| Chile | Poisoning by carbon monoxide                    | 0 (0 to 0) | 0 (0 to 0) | 36.7% (23.7% to 49.2%)    |
| Chile | Poisoning by other means                        | 0 (0 to 0) | 0 (0 to 0) | 7.2% (-0.6% to 14.7%)     |
| Chile | Pulmonary aspiration and foreign body in airway | 0 (0 to 0) | 0 (0 to 0) | -55.3% (-62.8% to -46.2%) |
| Chile | Self-harm by firearm                            | 0 (0 to 0) | 0 (0 to 0) | -36.2% (-47.7% to -25%)   |
| Chile | Self-harm by other specified means              | 0 (0 to 1) | 0 (0 to 0) | -13.8% (-18.5% to -8.9%)  |

|          |                                                 |            |             |                           |
|----------|-------------------------------------------------|------------|-------------|---------------------------|
| Chile    | Unintentional firearm injuries                  | 0 (0 to 0) | 0 (0 to 0)  | -13.4% (-24.8% to -3.5%)  |
| Chile    | Venomous animal contact                         | 0 (0 to 0) | 0 (0 to 0)  | -22.6% (-26.8% to -18.1%) |
| China    | Adverse effects of medical treatment            | 0 (0 to 0) | 0 (0 to 0)  | 0% (0% to 0%)             |
| China    | Conflict and terrorism                          | 0 (0 to 0) | 0 (0 to 0)  | NA                        |
| China    | Cyclist road injuries                           | 0 (0 to 1) | 1 (0 to 2)  | 101% (91% to 112.4%)      |
| China    | Drowning                                        | 0 (0 to 0) | 0 (0 to 0)  | 9.1% (-10.8% to 28.7%)    |
| China    | Environmental heat and cold exposure            | 0 (0 to 0) | 0 (0 to 0)  | -17.2% (-22.1% to -12.3%) |
| China    | Executions and police conflict                  | 0 (0 to 0) | 0 (0 to 0)  | NA                        |
| China    | Exposure to forces of nature                    | 0 (0 to 0) | 0 (0 to 0)  | NA                        |
| China    | Falls                                           | 6 (4 to 9) | 9 (6 to 13) | 41.5% (34.6% to 48.4%)    |
| China    | Fire, heat, and hot substances                  | 0 (0 to 0) | 0 (0 to 0)  | 9.5% (3.5% to 14.7%)      |
| China    | Foreign body in eyes                            | 0 (0 to 0) | 0 (0 to 0)  | 0% (0% to 0%)             |
| China    | Foreign body in other body part                 | 0 (0 to 1) | 0 (0 to 0)  | -35.7% (-40.5% to -30.4%) |
| China    | Motor vehicle road injuries                     | 0 (0 to 1) | 1 (0 to 1)  | 125.5% (114.4% to 139.4%) |
| China    | Motorcyclist road injuries                      | 1 (0 to 1) | 1 (0 to 2)  | 114.6% (102.4% to 128.5%) |
| China    | Non-venomous animal contact                     | 0 (0 to 0) | 0 (0 to 0)  | -40.8% (-43.2% to -38.4%) |
| China    | Other exposure to mechanical forces             | 0 (0 to 0) | 0 (0 to 0)  | 91% (74.2% to 115.1%)     |
| China    | Other road injuries                             | 0 (0 to 0) | 0 (0 to 0)  | 94.1% (83.3% to 106.1%)   |
| China    | Other transport injuries                        | 0 (0 to 1) | 0 (0 to 0)  | -23.9% (-28.7% to -18.8%) |
| China    | Other unintentional injuries                    | 0 (0 to 0) | 0 (0 to 0)  | -14.9% (-19.5% to -9.6%)  |
| China    | Pedestrian road injuries                        | 1 (0 to 1) | 1 (1 to 2)  | 59.8% (50.4% to 68.6%)    |
| China    | Physical violence by firearm                    | 0 (0 to 0) | 0 (0 to 0)  | 26.2% (2.5% to 47.2%)     |
| China    | Physical violence by other means                | 0 (0 to 1) | 0 (0 to 1)  | -6% (-11.2% to -0.9%)     |
| China    | Physical violence by sharp object               | 0 (0 to 0) | 0 (0 to 0)  | -29% (-36.8% to -22.3%)   |
| China    | Poisoning by carbon monoxide                    | 0 (0 to 0) | 0 (0 to 0)  | 53.5% (41.6% to 66.2%)    |
| China    | Poisoning by other means                        | 0 (0 to 0) | 0 (0 to 0)  | -0.9% (-6.6% to 4.5%)     |
| China    | Pulmonary aspiration and foreign body in airway | 0 (0 to 0) | 0 (0 to 0)  | -24.9% (-32.4% to -15.8%) |
| China    | Self-harm by firearm                            | 0 (0 to 0) | 0 (0 to 0)  | -8.3% (-27.7% to 25.6%)   |
| China    | Self-harm by other specified means              | 0 (0 to 0) | 0 (0 to 0)  | -63.6% (-70.8% to -55.8%) |
| China    | Unintentional firearm injuries                  | 0 (0 to 0) | 0 (0 to 0)  | -11.4% (-22.9% to -0.2%)  |
| China    | Venomous animal contact                         | 0 (0 to 0) | 0 (0 to 0)  | -49% (-53.3% to -43%)     |
| Colombia | Adverse effects of medical treatment            | 0 (0 to 0) | 0 (0 to 0)  | 0% (0% to 0%)             |
| Colombia | Conflict and terrorism                          | 2 (0 to 6) | 0 (0 to 0)  | NA                        |
| Colombia | Cyclist road injuries                           | 0 (0 to 1) | 0 (0 to 0)  | -12.2% (-23.5% to 1.1%)   |
| Colombia | Drowning                                        | 0 (0 to 0) | 0 (0 to 0)  | 66.6% (45.9% to 89.1%)    |
| Colombia | Environmental heat and cold exposure            | 0 (0 to 0) | 0 (0 to 0)  | -6.3% (-11.5% to -0.4%)   |
| Colombia | Executions and police conflict                  | 0 (0 to 0) | 0 (0 to 0)  | NA                        |
| Colombia | Exposure to forces of nature                    | 0 (0 to 0) | 0 (0 to 0)  | NA                        |
| Colombia | Falls                                           | 2 (2 to 3) | 2 (1 to 3)  | -16.3% (-21.6% to -10.9%) |
| Colombia | Fire, heat, and hot substances                  | 0 (0 to 0) | 0 (0 to 0)  | -26.3% (-34% to -18.3%)   |
| Colombia | Foreign body in eyes                            | 0 (0 to 0) | 0 (0 to 0)  | 0% (0% to 0%)             |
| Colombia | Foreign body in other body part                 | 0 (0 to 0) | 0 (0 to 0)  | -3.8% (-7.5% to 0.2%)     |
| Colombia | Motor vehicle road injuries                     | 1 (0 to 1) | 1 (0 to 1)  | -32.8% (-40.9% to -23.5%) |



|          |                                                 |            |            |                           |
|----------|-------------------------------------------------|------------|------------|---------------------------|
| Colombia | Motorcyclist road injuries                      | 0 (0 to 0) | 0 (0 to 1) | 100.5% (73.5% to 134.4%)  |
| Colombia | Non-venomous animal contact                     | 0 (0 to 0) | 0 (0 to 0) | -26.4% (-31.6% to -20.7%) |
| Colombia | Other exposure to mechanical forces             | 0 (0 to 1) | 0 (0 to 1) | -17.2% (-24.1% to -8.5%)  |
| Colombia | Other road injuries                             | 0 (0 to 0) | 0 (0 to 0) | -17.7% (-29% to -4.3%)    |
| Colombia | Other transport injuries                        | 0 (0 to 0) | 0 (0 to 0) | -9.7% (-13.4% to -5.5%)   |
| Colombia | Other unintentional injuries                    | 0 (0 to 0) | 0 (0 to 0) | -38.4% (-44.4% to -31.3%) |
| Colombia | Pedestrian road injuries                        | 1 (0 to 1) | 0 (0 to 0) | -57.7% (-63.7% to -51.3%) |
| Colombia | Physical violence by firearm                    | 1 (0 to 1) | 0 (0 to 1) | -37.3% (-66.5% to -14.1%) |
| Colombia | Physical violence by other means                | 0 (0 to 1) | 0 (0 to 0) | -48.3% (-65.6% to -36.5%) |
| Colombia | Physical violence by sharp object               | 1 (0 to 1) | 0 (0 to 1) | -50.3% (-70.6% to -34.1%) |
| Colombia | Poisoning by carbon monoxide                    | 0 (0 to 0) | 0 (0 to 0) | 32.9% (15.6% to 49.8%)    |
| Colombia | Poisoning by other means                        | 0 (0 to 0) | 0 (0 to 0) | -15.5% (-24.6% to -6.6%)  |
| Colombia | Pulmonary aspiration and foreign body in airway | 0 (0 to 0) | 0 (0 to 0) | -20.8% (-28.9% to -12.9%) |
| Colombia | Self-harm by firearm                            | 0 (0 to 0) | 0 (0 to 0) | 3.8% (-14.1% to 19.1%)    |
| Colombia | Self-harm by other specified means              | 0 (0 to 0) | 0 (0 to 0) | 51.6% (39.1% to 68%)      |
| Colombia | Unintentional firearm injuries                  | 0 (0 to 0) | 0 (0 to 0) | -30.1% (-39.4% to -22.1%) |
| Colombia | Venomous animal contact                         | 0 (0 to 0) | 0 (0 to 0) | -35.1% (-41.4% to -29.6%) |
| Comoros  | Adverse effects of medical treatment            | 0 (0 to 0) | 0 (0 to 0) | 0% (0% to 0%)             |
| Comoros  | Conflict and terrorism                          | 0 (0 to 0) | 0 (0 to 0) | NA                        |
| Comoros  | Cyclist road injuries                           | 2 (1 to 3) | 2 (1 to 4) | 15.4% (7.1% to 25.3%)     |
| Comoros  | Drowning                                        | 0 (0 to 0) | 0 (0 to 0) | -13.8% (-21% to -6.4%)    |
| Comoros  | Environmental heat and cold exposure            | 0 (0 to 0) | 0 (0 to 0) | -11.6% (-16.9% to -5.9%)  |
| Comoros  | Executions and police conflict                  | 0 (0 to 0) | 0 (0 to 0) | NA                        |
| Comoros  | Exposure to forces of nature                    | 0 (0 to 0) | 0 (0 to 0) | NA                        |
| Comoros  | Falls                                           | 3 (2 to 4) | 3 (2 to 5) | 23.2% (18.8% to 27.4%)    |
| Comoros  | Fire, heat, and hot substances                  | 0 (0 to 0) | 0 (0 to 0) | -17.8% (-22.6% to -13%)   |
| Comoros  | Foreign body in eyes                            | 0 (0 to 0) | 0 (0 to 0) | 0% (0% to 0%)             |
| Comoros  | Foreign body in other body part                 | 1 (0 to 1) | 1 (0 to 1) | 3.5% (-0.5% to 7.9%)      |
| Comoros  | Motor vehicle road injuries                     | 3 (1 to 5) | 3 (1 to 5) | 0.4% (-7.4% to 8.8%)      |
| Comoros  | Motorcyclist road injuries                      | 1 (0 to 2) | 1 (0 to 2) | -9.1% (-17.1% to -0.9%)   |
| Comoros  | Non-venomous animal contact                     | 1 (0 to 1) | 0 (0 to 1) | -18.5% (-23% to -13.4%)   |
| Comoros  | Other exposure to mechanical forces             | 0 (0 to 1) | 0 (0 to 1) | -16.7% (-21.3% to -11.2%) |
| Comoros  | Other road injuries                             | 0 (0 to 0) | 0 (0 to 0) | 23.7% (12.5% to 36.2%)    |
| Comoros  | Other transport injuries                        | 0 (0 to 1) | 0 (0 to 1) | -7.6% (-12.2% to -2.9%)   |
| Comoros  | Other unintentional injuries                    | 0 (0 to 1) | 0 (0 to 0) | -17.5% (-22.3% to -12.4%) |
| Comoros  | Pedestrian road injuries                        | 2 (1 to 4) | 2 (1 to 3) | -13.7% (-20.6% to -6.3%)  |
| Comoros  | Physical violence by firearm                    | 0 (0 to 0) | 0 (0 to 0) | 48.5% (32.3% to 65.4%)    |
| Comoros  | Physical violence by other means                | 0 (0 to 0) | 0 (0 to 0) | 25.2% (17.5% to 33.3%)    |
| Comoros  | Physical violence by sharp object               | 0 (0 to 0) | 0 (0 to 0) | 25.6% (16.2% to 35.6%)    |
| Comoros  | Poisoning by carbon monoxide                    | 0 (0 to 0) | 0 (0 to 0) | 22.3% (9% to 38.4%)       |
| Comoros  | Poisoning by other means                        | 0 (0 to 0) | 0 (0 to 0) | -24.5% (-30.7% to -16.4%) |
| Comoros  | Pulmonary aspiration and foreign body in airway | 0 (0 to 0) | 0 (0 to 0) | -6.7% (-16.1% to 4%)      |
| Comoros  | Self-harm by firearm                            | 0 (0 to 0) | 0 (0 to 0) | 25.5% (12.2% to 43.2%)    |

|              |                                                 |            |            |                           |
|--------------|-------------------------------------------------|------------|------------|---------------------------|
| Comoros      | Self-harm by other specified means              | 0 (0 to 0) | 0 (0 to 0) | 7.7% (2.7% to 12.6%)      |
| Comoros      | Unintentional firearm injuries                  | 0 (0 to 0) | 0 (0 to 0) | -21% (-27.6% to -13.1%)   |
| Comoros      | Venomous animal contact                         | 0 (0 to 0) | 0 (0 to 0) | -36.4% (-43.5% to -30.1%) |
| Congo        | Adverse effects of medical treatment            | 0 (0 to 0) | 0 (0 to 0) | 0% (0% to 0%)             |
| Congo        | Conflict and terrorism                          | 0 (0 to 0) | 0 (0 to 0) | NA                        |
| Congo        | Cyclist road injuries                           | 0 (0 to 0) | 0 (0 to 0) | 4.7% (-3% to 13.7%)       |
| Congo        | Drowning                                        | 0 (0 to 0) | 0 (0 to 0) | -26.8% (-33.2% to -19.7%) |
| Congo        | Environmental heat and cold exposure            | 0 (0 to 0) | 0 (0 to 0) | -7.9% (-13% to -2.5%)     |
| Congo        | Executions and police conflict                  | 0 (0 to 0) | 0 (0 to 0) | NA                        |
| Congo        | Exposure to forces of nature                    | 0 (0 to 0) | 0 (0 to 0) | NA                        |
| Congo        | Falls                                           | 1 (1 to 1) | 1 (1 to 1) | 12.4% (8.9% to 16.2%)     |
| Congo        | Fire, heat, and hot substances                  | 0 (0 to 0) | 0 (0 to 0) | -18.5% (-23.9% to -13.5%) |
| Congo        | Foreign body in eyes                            | 0 (0 to 0) | 0 (0 to 0) | 0% (0% to 0%)             |
| Congo        | Foreign body in other body part                 | 0 (0 to 1) | 0 (0 to 1) | -2.6% (-6.3% to 1.7%)     |
| Congo        | Motor vehicle road injuries                     | 1 (0 to 1) | 1 (0 to 1) | -6% (-11.7% to 0.9%)      |
| Congo        | Motorcyclist road injuries                      | 0 (0 to 0) | 0 (0 to 0) | -25.2% (-32.9% to -17.5%) |
| Congo        | Non-venomous animal contact                     | 0 (0 to 0) | 0 (0 to 0) | -10% (-14.2% to -5.4%)    |
| Congo        | Other exposure to mechanical forces             | 0 (0 to 0) | 0 (0 to 0) | -15.5% (-21.3% to -9.9%)  |
| Congo        | Other road injuries                             | 0 (0 to 0) | 0 (0 to 0) | 7.7% (-2.2% to 17.6%)     |
| Congo        | Other transport injuries                        | 0 (0 to 0) | 0 (0 to 0) | -19.2% (-24.3% to -14.3%) |
| Congo        | Other unintentional injuries                    | 0 (0 to 0) | 0 (0 to 0) | -13.9% (-20.1% to -8.1%)  |
| Congo        | Pedestrian road injuries                        | 1 (0 to 1) | 0 (0 to 1) | -20.6% (-26.5% to -14.9%) |
| Congo        | Physical violence by firearm                    | 0 (0 to 0) | 0 (0 to 0) | 2.4% (-7.7% to 14%)       |
| Congo        | Physical violence by other means                | 0 (0 to 0) | 0 (0 to 0) | -17.5% (-23% to -11.8%)   |
| Congo        | Physical violence by sharp object               | 0 (0 to 0) | 0 (0 to 0) | -17.8% (-23.4% to -11.6%) |
| Congo        | Poisoning by carbon monoxide                    | 0 (0 to 0) | 0 (0 to 0) | 13.8% (0.8% to 26.4%)     |
| Congo        | Poisoning by other means                        | 0 (0 to 0) | 0 (0 to 0) | -20.4% (-27.2% to -12.9%) |
| Congo        | Pulmonary aspiration and foreign body in airway | 0 (0 to 0) | 0 (0 to 0) | -22.7% (-29.9% to -14.4%) |
| Congo        | Self-harm by firearm                            | 0 (0 to 0) | 0 (0 to 0) | -6.3% (-16.8% to 7.8%)    |
| Congo        | Self-harm by other specified means              | 0 (0 to 0) | 0 (0 to 0) | -24.4% (-28.5% to -20.5%) |
| Congo        | Unintentional firearm injuries                  | 0 (0 to 0) | 0 (0 to 0) | -13.8% (-20.2% to -7.4%)  |
| Congo        | Venomous animal contact                         | 0 (0 to 0) | 0 (0 to 0) | -4.3% (-10.9% to 4%)      |
| Cook Islands | Adverse effects of medical treatment            | 0 (0 to 0) | 0 (0 to 0) | 0% (0% to 0%)             |
| Cook Islands | Conflict and terrorism                          | 0 (0 to 0) | 0 (0 to 0) | NA                        |
| Cook Islands | Cyclist road injuries                           | 1 (0 to 1) | 1 (0 to 1) | -13.9% (-20.4% to -5.6%)  |
| Cook Islands | Drowning                                        | 0 (0 to 0) | 0 (0 to 0) | 31.4% (19.1% to 43.9%)    |
| Cook Islands | Environmental heat and cold exposure            | 0 (0 to 0) | 0 (0 to 0) | 1.9% (-3.2% to 6.4%)      |
| Cook Islands | Executions and police conflict                  | 0 (0 to 0) | 0 (0 to 0) | NA                        |
| Cook Islands | Exposure to forces of nature                    | 2 (1 to 5) | 0 (0 to 0) | NA                        |
| Cook Islands | Falls                                           | 4 (3 to 6) | 6 (4 to 9) | 49.9% (45.1% to 54.9%)    |
| Cook Islands | Fire, heat, and hot substances                  | 0 (0 to 0) | 0 (0 to 0) | 10.2% (5.3% to 16.2%)     |
| Cook Islands | Foreign body in eyes                            | 0 (0 to 0) | 0 (0 to 0) | 0% (0% to 0%)             |
| Cook Islands | Foreign body in other body part                 | 0 (0 to 0) | 0 (0 to 0) | -2.3% (-6.5% to 2.7%)     |

|              |                                                 |            |            |                           |
|--------------|-------------------------------------------------|------------|------------|---------------------------|
| Cook Islands | Motor vehicle road injuries                     | 2 (1 to 3) | 1 (1 to 2) | -26.6% (-32.4% to -21%)   |
| Cook Islands | Motorcyclist road injuries                      | 1 (1 to 2) | 1 (0 to 2) | -17.1% (-23.3% to -9.3%)  |
| Cook Islands | Non-venomous animal contact                     | 0 (0 to 0) | 0 (0 to 0) | -15.9% (-19.8% to -12.1%) |
| Cook Islands | Other exposure to mechanical forces             | 0 (0 to 0) | 0 (0 to 0) | -2% (-7.2% to 2.1%)       |
| Cook Islands | Other road injuries                             | 0 (0 to 0) | 0 (0 to 0) | -22% (-29.6% to -13.7%)   |
| Cook Islands | Other transport injuries                        | 0 (0 to 1) | 0 (0 to 1) | -4.6% (-9% to 0%)         |
| Cook Islands | Other unintentional injuries                    | 0 (0 to 0) | 0 (0 to 0) | 4.4% (-0.4% to 8.2%)      |
| Cook Islands | Pedestrian road injuries                        | 1 (0 to 2) | 1 (0 to 1) | -25.9% (-32.1% to -19.7%) |
| Cook Islands | Physical violence by firearm                    | 0 (0 to 0) | 0 (0 to 0) | 27% (10.2% to 45.2%)      |
| Cook Islands | Physical violence by other means                | 0 (0 to 1) | 0 (0 to 1) | -18.2% (-23.4% to -12.9%) |
| Cook Islands | Physical violence by sharp object               | 0 (0 to 0) | 0 (0 to 0) | -27% (-36.5% to -17.7%)   |
| Cook Islands | Poisoning by carbon monoxide                    | 0 (0 to 0) | 0 (0 to 0) | 21.4% (11.7% to 32.2%)    |
| Cook Islands | Poisoning by other means                        | 0 (0 to 0) | 0 (0 to 0) | -9.5% (-16.9% to -2.9%)   |
| Cook Islands | Pulmonary aspiration and foreign body in airway | 0 (0 to 0) | 0 (0 to 0) | -4.7% (-13.9% to 5.7%)    |
| Cook Islands | Self-harm by firearm                            | 0 (0 to 0) | 0 (0 to 0) | 0.2% (-11.6% to 15.6%)    |
| Cook Islands | Self-harm by other specified means              | 0 (0 to 0) | 0 (0 to 0) | -20.2% (-25.6% to -14.1%) |
| Cook Islands | Unintentional firearm injuries                  | 0 (0 to 0) | 0 (0 to 0) | 3.4% (-4.7% to 11.7%)     |
| Cook Islands | Venomous animal contact                         | 0 (0 to 0) | 0 (0 to 0) | -11.6% (-17.8% to -5.4%)  |
| Costa Rica   | Adverse effects of medical treatment            | 0 (0 to 0) | 0 (0 to 0) | 0% (0% to 0%)             |
| Costa Rica   | Conflict and terrorism                          | 0 (0 to 0) | 0 (0 to 0) | NA                        |
| Costa Rica   | Cyclist road injuries                           | 0 (0 to 0) | 0 (0 to 0) | -32.2% (-41.3% to -23.6%) |
| Costa Rica   | Drowning                                        | 0 (0 to 0) | 0 (0 to 0) | -0.2% (-11.2% to 10.5%)   |
| Costa Rica   | Environmental heat and cold exposure            | 0 (0 to 0) | 0 (0 to 0) | 4.4% (-0.9% to 8.8%)      |
| Costa Rica   | Executions and police conflict                  | 0 (0 to 0) | 0 (0 to 0) | NA                        |
| Costa Rica   | Exposure to forces of nature                    | 0 (0 to 0) | 0 (0 to 0) | NA                        |
| Costa Rica   | Falls                                           | 3 (2 to 4) | 3 (2 to 4) | -3.1% (-7.2% to 0.7%)     |
| Costa Rica   | Fire, heat, and hot substances                  | 0 (0 to 0) | 0 (0 to 0) | -7.2% (-14.1% to -0.7%)   |
| Costa Rica   | Foreign body in eyes                            | 0 (0 to 0) | 0 (0 to 0) | 0% (0% to 0%)             |
| Costa Rica   | Foreign body in other body part                 | 0 (0 to 0) | 0 (0 to 0) | -6.5% (-10.5% to -2.3%)   |
| Costa Rica   | Motor vehicle road injuries                     | 1 (0 to 1) | 1 (0 to 1) | -4% (-13.9% to 5.8%)      |
| Costa Rica   | Motorcyclist road injuries                      | 0 (0 to 0) | 0 (0 to 0) | 37.8% (20.5% to 58%)      |
| Costa Rica   | Non-venomous animal contact                     | 0 (0 to 0) | 0 (0 to 0) | -19.1% (-22.8% to -15.3%) |
| Costa Rica   | Other exposure to mechanical forces             | 0 (0 to 1) | 0 (0 to 1) | -0.2% (-7.4% to 6.3%)     |
| Costa Rica   | Other road injuries                             | 0 (0 to 0) | 0 (0 to 0) | -2.9% (-14.7% to 10.2%)   |
| Costa Rica   | Other transport injuries                        | 0 (0 to 0) | 0 (0 to 0) | 22.5% (14.9% to 29.9%)    |
| Costa Rica   | Other unintentional injuries                    | 0 (0 to 0) | 0 (0 to 0) | -5.4% (-9.7% to -0.3%)    |
| Costa Rica   | Pedestrian road injuries                        | 0 (0 to 1) | 0 (0 to 1) | -16.3% (-26% to -6.5%)    |
| Costa Rica   | Physical violence by firearm                    | 0 (0 to 0) | 0 (0 to 0) | 215.1% (158.3% to 302.8%) |
| Costa Rica   | Physical violence by other means                | 0 (0 to 0) | 0 (0 to 0) | 24.3% (7.6% to 41.5%)     |
| Costa Rica   | Physical violence by sharp object               | 0 (0 to 0) | 0 (0 to 0) | 25.8% (2.8% to 48.4%)     |
| Costa Rica   | Poisoning by carbon monoxide                    | 0 (0 to 0) | 0 (0 to 0) | 14.6% (4.9% to 25.4%)     |
| Costa Rica   | Poisoning by other means                        | 0 (0 to 0) | 0 (0 to 0) | -3.1% (-9.9% to 3.6%)     |
| Costa Rica   | Pulmonary aspiration and foreign body in airway | 0 (0 to 0) | 0 (0 to 0) | -23% (-30.5% to -15%)     |

|            |                                                 |             |              |                           |
|------------|-------------------------------------------------|-------------|--------------|---------------------------|
| Costa Rica | Self-harm by firearm                            | 0 (0 to 0)  | 0 (0 to 0)   | 4.3% (-7.7% to 15%)       |
| Costa Rica | Self-harm by other specified means              | 0 (0 to 0)  | 0 (0 to 0)   | 21.5% (14.1% to 30.6%)    |
| Costa Rica | Unintentional firearm injuries                  | 0 (0 to 0)  | 0 (0 to 0)   | 11% (2.9% to 19.9%)       |
| Costa Rica | Venomous animal contact                         | 0 (0 to 0)  | 0 (0 to 0)   | -15.7% (-20.1% to -11.1%) |
| Croatia    | Adverse effects of medical treatment            | 0 (0 to 0)  | 0 (0 to 0)   | 0% (0% to 0%)             |
| Croatia    | Conflict and terrorism                          | 0 (0 to 0)  | 0 (0 to 0)   | NA                        |
| Croatia    | Cyclist road injuries                           | 1 (0 to 1)  | 1 (0 to 1)   | -4.7% (-14.8% to 8.5%)    |
| Croatia    | Drowning                                        | 0 (0 to 0)  | 0 (0 to 0)   | 100.1% (79% to 123.2%)    |
| Croatia    | Environmental heat and cold exposure            | 0 (0 to 0)  | 0 (0 to 0)   | -24.3% (-29.7% to -19.1%) |
| Croatia    | Executions and police conflict                  | 0 (0 to 0)  | 0 (0 to 0)   | NA                        |
| Croatia    | Exposure to forces of nature                    | 0 (0 to 0)  | 0 (0 to 0)   | NA                        |
| Croatia    | Falls                                           | 7 (5 to 10) | 10 (7 to 13) | 35.8% (29.4% to 43.1%)    |
| Croatia    | Fire, heat, and hot substances                  | 0 (0 to 0)  | 0 (0 to 0)   | -10.5% (-15.7% to -4.3%)  |
| Croatia    | Foreign body in eyes                            | 0 (0 to 0)  | 0 (0 to 0)   | 0% (0% to 0%)             |
| Croatia    | Foreign body in other body part                 | 0 (0 to 0)  | 0 (0 to 0)   | -13% (-20% to -5.8%)      |
| Croatia    | Motor vehicle road injuries                     | 3 (1 to 4)  | 2 (1 to 3)   | -29.4% (-36.5% to -21.6%) |
| Croatia    | Motorcyclist road injuries                      | 0 (0 to 0)  | 0 (0 to 1)   | 37.2% (16.2% to 64.6%)    |
| Croatia    | Non-venomous animal contact                     | 0 (0 to 0)  | 0 (0 to 0)   | -21.9% (-28.7% to -15.2%) |
| Croatia    | Other exposure to mechanical forces             | 2 (1 to 3)  | 1 (1 to 2)   | -25.6% (-32.1% to -18.7%) |
| Croatia    | Other road injuries                             | 0 (0 to 0)  | 0 (0 to 0)   | 5% (-6.7% to 18.9%)       |
| Croatia    | Other transport injuries                        | 0 (0 to 0)  | 0 (0 to 0)   | -13% (-18.4% to -8.1%)    |
| Croatia    | Other unintentional injuries                    | 1 (0 to 1)  | 0 (0 to 0)   | -66.2% (-71.5% to -60.1%) |
| Croatia    | Pedestrian road injuries                        | 1 (0 to 2)  | 1 (0 to 1)   | -40.3% (-48.5% to -31.4%) |
| Croatia    | Physical violence by firearm                    | 0 (0 to 0)  | 0 (0 to 0)   | -41.3% (-54.8% to -27.1%) |
| Croatia    | Physical violence by other means                | 0 (0 to 1)  | 0 (0 to 0)   | -38.5% (-47.3% to -29.2%) |
| Croatia    | Physical violence by sharp object               | 0 (0 to 0)  | 0 (0 to 0)   | -45.4% (-54.4% to -36.7%) |
| Croatia    | Poisoning by carbon monoxide                    | 0 (0 to 0)  | 0 (0 to 0)   | 17.2% (4.5% to 30.6%)     |
| Croatia    | Poisoning by other means                        | 0 (0 to 0)  | 0 (0 to 0)   | -1.6% (-9.1% to 7.2%)     |
| Croatia    | Pulmonary aspiration and foreign body in airway | 0 (0 to 0)  | 0 (0 to 0)   | 3.4% (-4.1% to 11.8%)     |
| Croatia    | Self-harm by firearm                            | 0 (0 to 0)  | 0 (0 to 0)   | -30.7% (-39.1% to -19.8%) |
| Croatia    | Self-harm by other specified means              | 0 (0 to 1)  | 0 (0 to 0)   | -38.8% (-42.8% to -34.1%) |
| Croatia    | Unintentional firearm injuries                  | 0 (0 to 0)  | 0 (0 to 0)   | -52.8% (-62.1% to -44.5%) |
| Croatia    | Venomous animal contact                         | 0 (0 to 0)  | 0 (0 to 0)   | -26.2% (-35.1% to -15.9%) |
| Cuba       | Adverse effects of medical treatment            | 0 (0 to 0)  | 0 (0 to 0)   | 0% (0% to 0%)             |
| Cuba       | Conflict and terrorism                          | 0 (0 to 0)  | 0 (0 to 0)   | NA                        |
| Cuba       | Cyclist road injuries                           | 1 (0 to 1)  | 0 (0 to 1)   | -52.2% (-59.7% to -43.6%) |
| Cuba       | Drowning                                        | 0 (0 to 0)  | 0 (0 to 0)   | 60.1% (38.8% to 83%)      |
| Cuba       | Environmental heat and cold exposure            | 0 (0 to 0)  | 0 (0 to 0)   | 8.1% (2.9% to 13.4%)      |
| Cuba       | Executions and police conflict                  | 0 (0 to 0)  | 0 (0 to 0)   | NA                        |
| Cuba       | Exposure to forces of nature                    | 0 (0 to 0)  | 0 (0 to 0)   | NA                        |
| Cuba       | Falls                                           | 3 (2 to 4)  | 5 (3 to 7)   | 55.9% (48.3% to 63.9%)    |
| Cuba       | Fire, heat, and hot substances                  | 0 (0 to 0)  | 0 (0 to 0)   | 25.2% (13.8% to 37.2%)    |
| Cuba       | Foreign body in eyes                            | 0 (0 to 0)  | 0 (0 to 0)   | 0% (0% to 0%)             |

|        |                                                 |            |            |                           |
|--------|-------------------------------------------------|------------|------------|---------------------------|
| Cuba   | Foreign body in other body part                 | 0 (0 to 0) | 0 (0 to 0) | 34.6% (28.4% to 40.8%)    |
| Cuba   | Motor vehicle road injuries                     | 0 (0 to 1) | 0 (0 to 1) | -33.3% (-42% to -23.4%)   |
| Cuba   | Motorcyclist road injuries                      | 0 (0 to 0) | 0 (0 to 0) | -4.6% (-19.9% to 13.9%)   |
| Cuba   | Non-venomous animal contact                     | 0 (0 to 0) | 0 (0 to 0) | 35.3% (28% to 42.3%)      |
| Cuba   | Other exposure to mechanical forces             | 0 (0 to 1) | 0 (0 to 1) | 28.1% (14.5% to 39.8%)    |
| Cuba   | Other road injuries                             | 0 (0 to 0) | 0 (0 to 0) | 22.6% (5.5% to 43.8%)     |
| Cuba   | Other transport injuries                        | 0 (0 to 0) | 0 (0 to 0) | 42.9% (31.7% to 53.3%)    |
| Cuba   | Other unintentional injuries                    | 0 (0 to 0) | 0 (0 to 0) | 14.8% (6.8% to 21.8%)     |
| Cuba   | Pedestrian road injuries                        | 0 (0 to 0) | 0 (0 to 0) | -45.5% (-53.6% to -36.4%) |
| Cuba   | Physical violence by firearm                    | 0 (0 to 0) | 0 (0 to 0) | 50.4% (30.9% to 77.7%)    |
| Cuba   | Physical violence by other means                | 0 (0 to 0) | 0 (0 to 0) | -16.2% (-26.3% to -6%)    |
| Cuba   | Physical violence by sharp object               | 0 (0 to 0) | 0 (0 to 0) | -18.1% (-30% to -5%)      |
| Cuba   | Poisoning by carbon monoxide                    | 0 (0 to 0) | 0 (0 to 0) | 76.6% (59% to 98.9%)      |
| Cuba   | Poisoning by other means                        | 0 (0 to 0) | 0 (0 to 0) | 62.3% (51.4% to 72.6%)    |
| Cuba   | Pulmonary aspiration and foreign body in airway | 0 (0 to 0) | 0 (0 to 0) | -22.2% (-30.1% to -13.8%) |
| Cuba   | Self-harm by firearm                            | 0 (0 to 0) | 0 (0 to 0) | -24.8% (-35.4% to -11.8%) |
| Cuba   | Self-harm by other specified means              | 0 (0 to 0) | 0 (0 to 0) | -56% (-60.8% to -50.6%)   |
| Cuba   | Unintentional firearm injuries                  | 0 (0 to 0) | 0 (0 to 1) | 64.5% (51.2% to 82.1%)    |
| Cuba   | Venomous animal contact                         | 0 (0 to 0) | 0 (0 to 0) | 36.2% (26.6% to 46.1%)    |
| Cyprus | Adverse effects of medical treatment            | 0 (0 to 0) | 0 (0 to 0) | 0% (0% to 0%)             |
| Cyprus | Conflict and terrorism                          | 0 (0 to 0) | 0 (0 to 0) | NA                        |
| Cyprus | Cyclist road injuries                           | 0 (0 to 0) | 0 (0 to 0) | -23% (-30.6% to -14.9%)   |
| Cyprus | Drowning                                        | 0 (0 to 0) | 0 (0 to 0) | 96.2% (78.3% to 116.2%)   |
| Cyprus | Environmental heat and cold exposure            | 0 (0 to 0) | 0 (0 to 0) | -10.8% (-16.1% to -5.4%)  |
| Cyprus | Executions and police conflict                  | 0 (0 to 0) | 0 (0 to 0) | NA                        |
| Cyprus | Exposure to forces of nature                    | 0 (0 to 0) | 0 (0 to 0) | NA                        |
| Cyprus | Falls                                           | 5 (4 to 7) | 7 (5 to 9) | 23.2% (18% to 28%)        |
| Cyprus | Fire, heat, and hot substances                  | 0 (0 to 0) | 0 (0 to 0) | -11.5% (-17.3% to -6.6%)  |
| Cyprus | Foreign body in eyes                            | 0 (0 to 0) | 0 (0 to 0) | 0% (0% to 0%)             |
| Cyprus | Foreign body in other body part                 | 0 (0 to 0) | 0 (0 to 0) | 0.6% (-2.9% to 4.4%)      |
| Cyprus | Motor vehicle road injuries                     | 1 (0 to 1) | 0 (0 to 1) | -40.8% (-46.1% to -35.3%) |
| Cyprus | Motorcyclist road injuries                      | 0 (0 to 0) | 0 (0 to 0) | -34.9% (-43.4% to -24.6%) |
| Cyprus | Non-venomous animal contact                     | 0 (0 to 0) | 0 (0 to 0) | -9.7% (-13.6% to -6%)     |
| Cyprus | Other exposure to mechanical forces             | 1 (0 to 1) | 1 (0 to 1) | -21.1% (-28.6% to -15.3%) |
| Cyprus | Other road injuries                             | 0 (0 to 0) | 0 (0 to 0) | -12.8% (-21.6% to -3.7%)  |
| Cyprus | Other transport injuries                        | 0 (0 to 0) | 0 (0 to 0) | -39.8% (-46.2% to -33%)   |
| Cyprus | Other unintentional injuries                    | 0 (0 to 0) | 0 (0 to 0) | -10.8% (-15.5% to -6.5%)  |
| Cyprus | Pedestrian road injuries                        | 0 (0 to 0) | 0 (0 to 0) | -43.6% (-50.5% to -36.1%) |
| Cyprus | Physical violence by firearm                    | 0 (0 to 0) | 0 (0 to 0) | 50.2% (35.4% to 68.5%)    |
| Cyprus | Physical violence by other means                | 0 (0 to 0) | 0 (0 to 0) | -27.3% (-34.8% to -20.2%) |
| Cyprus | Physical violence by sharp object               | 0 (0 to 0) | 0 (0 to 0) | -20.9% (-29.7% to -11.8%) |
| Cyprus | Poisoning by carbon monoxide                    | 0 (0 to 0) | 0 (0 to 0) | 20.7% (10.6% to 31%)      |
| Cyprus | Poisoning by other means                        | 0 (0 to 0) | 0 (0 to 0) | -9.9% (-18.3% to -4%)     |

|               |                                                 |              |             |                           |
|---------------|-------------------------------------------------|--------------|-------------|---------------------------|
| Cyprus        | Pulmonary aspiration and foreign body in airway | 0 (0 to 0)   | 0 (0 to 0)  | -23.8% (-30% to -16.9%)   |
| Cyprus        | Self-harm by firearm                            | 0 (0 to 0)   | 0 (0 to 0)  | 9.5% (-2.5% to 22.3%)     |
| Cyprus        | Self-harm by other specified means              | 0 (0 to 0)   | 0 (0 to 0)  | -1.9% (-7.7% to 5%)       |
| Cyprus        | Unintentional firearm injuries                  | 0 (0 to 0)   | 0 (0 to 0)  | -23.9% (-34% to -14.9%)   |
| Cyprus        | Venomous animal contact                         | 0 (0 to 0)   | 0 (0 to 0)  | -13.1% (-19.6% to -7.9%)  |
| Czechia       | Adverse effects of medical treatment            | 0 (0 to 0)   | 0 (0 to 0)  | 0% (0% to 0%)             |
| Czechia       | Conflict and terrorism                          | 0 (0 to 0)   | 0 (0 to 0)  | NA                        |
| Czechia       | Cyclist road injuries                           | 1 (0 to 1)   | 1 (0 to 1)  | -8.3% (-19.5% to 4.9%)    |
| Czechia       | Drowning                                        | 0 (0 to 0)   | 0 (0 to 0)  | 85% (61% to 105.3%)       |
| Czechia       | Environmental heat and cold exposure            | 0 (0 to 0)   | 0 (0 to 0)  | 2.5% (-3.5% to 8.5%)      |
| Czechia       | Executions and police conflict                  | 0 (0 to 0)   | 0 (0 to 0)  | NA                        |
| Czechia       | Exposure to forces of nature                    | 0 (0 to 0)   | 0 (0 to 0)  | NA                        |
| Czechia       | Falls                                           | 10 (7 to 14) | 8 (5 to 10) | -25.2% (-30.7% to -19.4%) |
| Czechia       | Fire, heat, and hot substances                  | 0 (0 to 0)   | 0 (0 to 0)  | -4.5% (-10.6% to 0.4%)    |
| Czechia       | Foreign body in eyes                            | 0 (0 to 0)   | 0 (0 to 0)  | 0% (0% to 0%)             |
| Czechia       | Foreign body in other body part                 | 0 (0 to 0)   | 0 (0 to 0)  | 0.6% (-3.5% to 4.3%)      |
| Czechia       | Motor vehicle road injuries                     | 3 (1 to 4)   | 2 (1 to 3)  | -38.7% (-46.2% to -31.3%) |
| Czechia       | Motorcyclist road injuries                      | 0 (0 to 1)   | 0 (0 to 1)  | -5% (-19.4% to 12.4%)     |
| Czechia       | Non-venomous animal contact                     | 0 (0 to 0)   | 0 (0 to 0)  | -13.7% (-17.3% to -9.9%)  |
| Czechia       | Other exposure to mechanical forces             | 2 (1 to 3)   | 2 (1 to 3)  | -8.3% (-13.4% to -2.6%)   |
| Czechia       | Other road injuries                             | 0 (0 to 0)   | 0 (0 to 0)  | -1.1% (-13.2% to 13%)     |
| Czechia       | Other transport injuries                        | 0 (0 to 0)   | 0 (0 to 0)  | -17.2% (-22.6% to -11.7%) |
| Czechia       | Other unintentional injuries                    | 0 (0 to 1)   | 0 (0 to 1)  | -22.3% (-29.2% to -15%)   |
| Czechia       | Pedestrian road injuries                        | 0 (0 to 1)   | 0 (0 to 1)  | -11.6% (-22.9% to 1.3%)   |
| Czechia       | Physical violence by firearm                    | 0 (0 to 0)   | 0 (0 to 0)  | 60.9% (41.7% to 81.6%)    |
| Czechia       | Physical violence by other means                | 0 (0 to 1)   | 0 (0 to 1)  | -9.7% (-19.5% to -0.8%)   |
| Czechia       | Physical violence by sharp object               | 0 (0 to 0)   | 0 (0 to 0)  | -20.1% (-31.2% to -9.5%)  |
| Czechia       | Poisoning by carbon monoxide                    | 0 (0 to 0)   | 0 (0 to 0)  | -3.5% (-17.2% to 9.7%)    |
| Czechia       | Poisoning by other means                        | 0 (0 to 0)   | 0 (0 to 0)  | -4% (-13.6% to 4.7%)      |
| Czechia       | Pulmonary aspiration and foreign body in airway | 0 (0 to 0)   | 0 (0 to 0)  | -25.5% (-32.7% to -18%)   |
| Czechia       | Self-harm by firearm                            | 0 (0 to 0)   | 0 (0 to 0)  | -0.6% (-13.2% to 18.6%)   |
| Czechia       | Self-harm by other specified means              | 0 (0 to 1)   | 0 (0 to 1)  | -24.3% (-28.5% to -19.2%) |
| Czechia       | Unintentional firearm injuries                  | 0 (0 to 0)   | 0 (0 to 0)  | -2.3% (-10.4% to 6%)      |
| Czechia       | Venomous animal contact                         | 0 (0 to 0)   | 0 (0 to 0)  | -16.7% (-21.7% to -11.5%) |
| Côte d'Ivoire | Adverse effects of medical treatment            | 0 (0 to 0)   | 0 (0 to 0)  | 0% (0% to 0%)             |
| Côte d'Ivoire | Conflict and terrorism                          | 0 (0 to 0)   | 0 (0 to 0)  | NA                        |
| Côte d'Ivoire | Cyclist road injuries                           | 1 (1 to 2)   | 1 (1 to 3)  | 9.1% (1.8% to 17.6%)      |
| Côte d'Ivoire | Drowning                                        | 0 (0 to 0)   | 0 (0 to 0)  | -9.7% (-16.5% to -2.3%)   |
| Côte d'Ivoire | Environmental heat and cold exposure            | 0 (0 to 0)   | 0 (0 to 0)  | 1.5% (-2.6% to 6.9%)      |
| Côte d'Ivoire | Executions and police conflict                  | 0 (0 to 0)   | 0 (0 to 0)  | NA                        |
| Côte d'Ivoire | Exposure to forces of nature                    | 0 (0 to 0)   | 0 (0 to 0)  | NA                        |
| Côte d'Ivoire | Falls                                           | 3 (2 to 4)   | 3 (2 to 5)  | 10.9% (7.2% to 15%)       |
| Côte d'Ivoire | Fire, heat, and hot substances                  | 0 (0 to 0)   | 0 (0 to 0)  | -9.4% (-14.7% to -4%)     |



|                                       |                                                 |            |            |                           |
|---------------------------------------|-------------------------------------------------|------------|------------|---------------------------|
| Côte d'Ivoire                         | Foreign body in eyes                            | 0 (0 to 0) | 0 (0 to 0) | 0% (0% to 0%)             |
| Côte d'Ivoire                         | Foreign body in other body part                 | 1 (0 to 1) | 1 (0 to 1) | 1.7% (-1.9% to 5.3%)      |
| Côte d'Ivoire                         | Motor vehicle road injuries                     | 2 (1 to 3) | 2 (1 to 3) | 1.3% (-6.4% to 9.7%)      |
| Côte d'Ivoire                         | Motorcyclist road injuries                      | 1 (0 to 1) | 1 (0 to 1) | -0.8% (-8.8% to 7.9%)     |
| Côte d'Ivoire                         | Non-venomous animal contact                     | 0 (0 to 0) | 0 (0 to 0) | -9.2% (-13.3% to -4.9%)   |
| Côte d'Ivoire                         | Other exposure to mechanical forces             | 0 (0 to 0) | 0 (0 to 0) | -11.4% (-16% to -7.1%)    |
| Côte d'Ivoire                         | Other road injuries                             | 0 (0 to 0) | 0 (0 to 0) | 5.2% (-3.7% to 14%)       |
| Côte d'Ivoire                         | Other transport injuries                        | 0 (0 to 1) | 0 (0 to 0) | -7.9% (-11.6% to -4.2%)   |
| Côte d'Ivoire                         | Other unintentional injuries                    | 0 (0 to 1) | 0 (0 to 0) | -10.2% (-14.8% to -5.5%)  |
| Côte d'Ivoire                         | Pedestrian road injuries                        | 2 (1 to 4) | 2 (1 to 4) | -4.1% (-10.6% to 2.7%)    |
| Côte d'Ivoire                         | Physical violence by firearm                    | 0 (0 to 0) | 0 (0 to 0) | 4.6% (-6.4% to 19%)       |
| Côte d'Ivoire                         | Physical violence by other means                | 0 (0 to 0) | 0 (0 to 0) | -3.9% (-9.2% to 1.4%)     |
| Côte d'Ivoire                         | Physical violence by sharp object               | 0 (0 to 0) | 0 (0 to 0) | -6.9% (-13.8% to 0%)      |
| Côte d'Ivoire                         | Poisoning by carbon monoxide                    | 0 (0 to 0) | 0 (0 to 0) | 12.1% (1.3% to 23.5%)     |
| Côte d'Ivoire                         | Poisoning by other means                        | 0 (0 to 0) | 0 (0 to 0) | -13.5% (-19.5% to -7.1%)  |
| Côte d'Ivoire                         | Pulmonary aspiration and foreign body in airway | 0 (0 to 0) | 0 (0 to 0) | -6% (-15.4% to 3%)        |
| Côte d'Ivoire                         | Self-harm by firearm                            | 0 (0 to 0) | 0 (0 to 0) | 1.9% (-10.6% to 14.4%)    |
| Côte d'Ivoire                         | Self-harm by other specified means              | 0 (0 to 0) | 0 (0 to 0) | 0.7% (-4.2% to 5.5%)      |
| Côte d'Ivoire                         | Unintentional firearm injuries                  | 0 (0 to 0) | 0 (0 to 0) | -12.1% (-18.7% to -5.6%)  |
| Côte d'Ivoire                         | Venomous animal contact                         | 0 (0 to 0) | 0 (0 to 0) | -10% (-16.8% to -3.5%)    |
| Democratic People's Republic of Korea | Adverse effects of medical treatment            | 0 (0 to 0) | 0 (0 to 0) | 0% (0% to 0%)             |
| Democratic People's Republic of Korea | Conflict and terrorism                          | 0 (0 to 0) | 0 (0 to 0) | NA                        |
| Democratic People's Republic of Korea | Cyclist road injuries                           | 0 (0 to 0) | 0 (0 to 0) | 42.9% (30.5% to 57.4%)    |
| Democratic People's Republic of Korea | Drowning                                        | 0 (0 to 0) | 0 (0 to 0) | -22% (-32.7% to -8.9%)    |
| Democratic People's Republic of Korea | Environmental heat and cold exposure            | 0 (0 to 0) | 0 (0 to 0) | 3.5% (-1.6% to 8.9%)      |
| Democratic People's Republic of Korea | Executions and police conflict                  | 0 (0 to 0) | 0 (0 to 0) | NA                        |
| Democratic People's Republic of Korea | Exposure to forces of nature                    | 0 (0 to 0) | 0 (0 to 0) | NA                        |
| Democratic People's Republic of Korea | Falls                                           | 1 (1 to 2) | 1 (1 to 1) | -37.2% (-39.3% to -34.9%) |
| Democratic People's Republic of Korea | Fire, heat, and hot substances                  | 0 (0 to 0) | 0 (0 to 0) | -13.7% (-18.7% to -8.9%)  |
| Democratic People's Republic of Korea | Foreign body in eyes                            | 0 (0 to 0) | 0 (0 to 0) | 0% (0% to 0%)             |
| Democratic People's Republic of Korea | Foreign body in other body part                 | 0 (0 to 0) | 0 (0 to 0) | -5.4% (-9.5% to -1.1%)    |
| Democratic People's Republic of Korea | Motor vehicle road injuries                     | 0 (0 to 0) | 0 (0 to 0) | 18% (7.8% to 28.7%)       |
| Democratic People's Republic of Korea | Motorcyclist road injuries                      | 0 (0 to 1) | 0 (0 to 1) | 44.9% (32% to 58.5%)      |
| Democratic People's Republic of Korea | Non-venomous animal contact                     | 0 (0 to 0) | 0 (0 to 0) | -14.8% (-18.5% to -11.1%) |
| Democratic People's Republic of Korea | Other exposure to mechanical forces             | 0 (0 to 0) | 0 (0 to 0) | 75.2% (56.8% to 102.6%)   |
| Democratic People's Republic of Korea | Other road injuries                             | 0 (0 to 0) | 0 (0 to 0) | 12.3% (2.4% to 24%)       |
| Democratic People's Republic of Korea | Other transport injuries                        | 0 (0 to 0) | 0 (0 to 0) | -4.9% (-8.4% to -0.9%)    |
| Democratic People's Republic of Korea | Other unintentional injuries                    | 0 (0 to 0) | 0 (0 to 0) | 2.9% (-2.3% to 9.5%)      |
| Democratic People's Republic of Korea | Pedestrian road injuries                        | 0 (0 to 0) | 0 (0 to 0) | 16% (6.8% to 26.2%)       |
| Democratic People's Republic of Korea | Physical violence by firearm                    | 0 (0 to 0) | 0 (0 to 0) | 8.1% (-3.5% to 19.3%)     |
| Democratic People's Republic of Korea | Physical violence by other means                | 0 (0 to 0) | 0 (0 to 0) | 20.5% (12.3% to 30.5%)    |
| Democratic People's Republic of Korea | Physical violence by sharp object               | 0 (0 to 0) | 0 (0 to 0) | 4.8% (-4.5% to 14.3%)     |
| Democratic People's Republic of Korea | Poisoning by carbon monoxide                    | 0 (0 to 0) | 0 (0 to 0) | 18.2% (8.4% to 29.9%)     |

|                                       |                                                 |             |            |                           |
|---------------------------------------|-------------------------------------------------|-------------|------------|---------------------------|
| Democratic People's Republic of Korea | Poisoning by other means                        | 0 (0 to 0)  | 0 (0 to 0) | -10.1% (-16.9% to -2.3%)  |
| Democratic People's Republic of Korea | Pulmonary aspiration and foreign body in airway | 0 (0 to 0)  | 0 (0 to 0) | 18.2% (2.5% to 35.6%)     |
| Democratic People's Republic of Korea | Self-harm by firearm                            | 0 (0 to 0)  | 0 (0 to 0) | -29.2% (-35.3% to -20.3%) |
| Democratic People's Republic of Korea | Self-harm by other specified means              | 0 (0 to 0)  | 0 (0 to 0) | -44.1% (-48.1% to -39.9%) |
| Democratic People's Republic of Korea | Unintentional firearm injuries                  | 0 (0 to 0)  | 0 (0 to 0) | 5.9% (-6.9% to 17.4%)     |
| Democratic People's Republic of Korea | Venomous animal contact                         | 0 (0 to 0)  | 0 (0 to 0) | -7.9% (-14.4% to -0.4%)   |
| Democratic Republic of the Congo      | Adverse effects of medical treatment            | 0 (0 to 0)  | 0 (0 to 0) | 0% (0% to 0%)             |
| Democratic Republic of the Congo      | Conflict and terrorism                          | 0 (0 to 1)  | 1 (0 to 3) | NA                        |
| Democratic Republic of the Congo      | Cyclist road injuries                           | 0 (0 to 0)  | 0 (0 to 0) | -7.1% (-13.4% to -0.8%)   |
| Democratic Republic of the Congo      | Drowning                                        | 0 (0 to 0)  | 0 (0 to 0) | -25.8% (-32.4% to -18%)   |
| Democratic Republic of the Congo      | Environmental heat and cold exposure            | 0 (0 to 0)  | 0 (0 to 0) | -3.1% (-8.5% to 2.2%)     |
| Democratic Republic of the Congo      | Executions and police conflict                  | 0 (0 to 0)  | 0 (0 to 0) | NA                        |
| Democratic Republic of the Congo      | Exposure to forces of nature                    | 0 (0 to 0)  | 0 (0 to 0) | NA                        |
| Democratic Republic of the Congo      | Falls                                           | 1 (1 to 1)  | 1 (1 to 1) | 20.5% (16.2% to 25.2%)    |
| Democratic Republic of the Congo      | Fire, heat, and hot substances                  | 0 (0 to 0)  | 0 (0 to 0) | -9.4% (-14.3% to -4.8%)   |
| Democratic Republic of the Congo      | Foreign body in eyes                            | 0 (0 to 0)  | 0 (0 to 0) | 0% (0% to 0%)             |
| Democratic Republic of the Congo      | Foreign body in other body part                 | 0 (0 to 1)  | 0 (0 to 1) | -4.5% (-8.1% to -0.3%)    |
| Democratic Republic of the Congo      | Motor vehicle road injuries                     | 1 (0 to 1)  | 1 (0 to 1) | -12.9% (-18.3% to -7.3%)  |
| Democratic Republic of the Congo      | Motorcyclist road injuries                      | 0 (0 to 0)  | 0 (0 to 0) | -9.9% (-19% to -0.6%)     |
| Democratic Republic of the Congo      | Non-venomous animal contact                     | 0 (0 to 0)  | 0 (0 to 0) | 3.2% (-1.4% to 7.5%)      |
| Democratic Republic of the Congo      | Other exposure to mechanical forces             | 0 (0 to 0)  | 0 (0 to 0) | -7.2% (-12.5% to -2%)     |
| Democratic Republic of the Congo      | Other road injuries                             | 0 (0 to 0)  | 0 (0 to 0) | -1.2% (-9.2% to 8%)       |
| Democratic Republic of the Congo      | Other transport injuries                        | 0 (0 to 0)  | 0 (0 to 0) | 1.2% (-2.7% to 5.4%)      |
| Democratic Republic of the Congo      | Other unintentional injuries                    | 0 (0 to 0)  | 0 (0 to 0) | -5.8% (-10.4% to -0.4%)   |
| Democratic Republic of the Congo      | Pedestrian road injuries                        | 0 (0 to 1)  | 0 (0 to 1) | -5.9% (-11.4% to 0.1%)    |
| Democratic Republic of the Congo      | Physical violence by firearm                    | 0 (0 to 0)  | 0 (0 to 0) | 2.2% (-6.9% to 12.9%)     |
| Democratic Republic of the Congo      | Physical violence by other means                | 0 (0 to 0)  | 0 (0 to 0) | -11% (-16.9% to -4.6%)    |
| Democratic Republic of the Congo      | Physical violence by sharp object               | 0 (0 to 0)  | 0 (0 to 0) | -6.6% (-13.6% to 0.6%)    |
| Democratic Republic of the Congo      | Poisoning by carbon monoxide                    | 0 (0 to 0)  | 0 (0 to 0) | 10% (-1.4% to 22%)        |
| Democratic Republic of the Congo      | Poisoning by other means                        | 0 (0 to 0)  | 0 (0 to 0) | -19.6% (-26.1% to -12.8%) |
| Democratic Republic of the Congo      | Pulmonary aspiration and foreign body in airway | 0 (0 to 0)  | 0 (0 to 0) | -11.7% (-19.6% to -1.7%)  |
| Democratic Republic of the Congo      | Self-harm by firearm                            | 0 (0 to 0)  | 0 (0 to 0) | 13.5% (1.8% to 28%)       |
| Democratic Republic of the Congo      | Self-harm by other specified means              | 0 (0 to 0)  | 0 (0 to 0) | 0.4% (-4.6% to 5.2%)      |
| Democratic Republic of the Congo      | Unintentional firearm injuries                  | 0 (0 to 0)  | 0 (0 to 0) | -10% (-15.5% to -4.1%)    |
| Democratic Republic of the Congo      | Venomous animal contact                         | 0 (0 to 0)  | 0 (0 to 0) | 8.8% (1.4% to 17.3%)      |
| Denmark                               | Adverse effects of medical treatment            | 0 (0 to 0)  | 0 (0 to 0) | 0% (0% to 0%)             |
| Denmark                               | Conflict and terrorism                          | 0 (0 to 0)  | 0 (0 to 0) | NA                        |
| Denmark                               | Cyclist road injuries                           | 0 (0 to 1)  | 0 (0 to 0) | -49.6% (-57.2% to -41.8%) |
| Denmark                               | Drowning                                        | 0 (0 to 0)  | 0 (0 to 0) | 73.8% (58.1% to 90.3%)    |
| Denmark                               | Environmental heat and cold exposure            | 0 (0 to 0)  | 0 (0 to 0) | 1.7% (-1.7% to 5.5%)      |
| Denmark                               | Executions and police conflict                  | 0 (0 to 0)  | 0 (0 to 0) | NA                        |
| Denmark                               | Exposure to forces of nature                    | 0 (0 to 0)  | 0 (0 to 0) | NA                        |
| Denmark                               | Falls                                           | 8 (5 to 11) | 6 (4 to 8) | -21.5% (-27.2% to -14.9%) |

|          |                                                 |             |            |                           |
|----------|-------------------------------------------------|-------------|------------|---------------------------|
| Denmark  | Fire, heat, and hot substances                  | 0 (0 to 0)  | 0 (0 to 0) | -13.8% (-18.6% to -9.4%)  |
| Denmark  | Foreign body in eyes                            | 0 (0 to 0)  | 0 (0 to 0) | 0% (0% to 0%)             |
| Denmark  | Foreign body in other body part                 | 0 (0 to 0)  | 0 (0 to 0) | 0.2% (-3.1% to 3.6%)      |
| Denmark  | Motor vehicle road injuries                     | 1 (0 to 1)  | 0 (0 to 1) | -46.7% (-54.4% to -39.4%) |
| Denmark  | Motorcyclist road injuries                      | 0 (0 to 0)  | 0 (0 to 0) | -21.1% (-35.2% to -4.9%)  |
| Denmark  | Non-venomous animal contact                     | 0 (0 to 0)  | 0 (0 to 0) | -4.4% (-7.8% to -0.1%)    |
| Denmark  | Other exposure to mechanical forces             | 1 (0 to 1)  | 0 (0 to 1) | -8.4% (-16.1% to -2.4%)   |
| Denmark  | Other road injuries                             | 0 (0 to 0)  | 0 (0 to 0) | -6% (-19.7% to 9.2%)      |
| Denmark  | Other transport injuries                        | 0 (0 to 0)  | 0 (0 to 0) | -17.1% (-24.2% to -10.4%) |
| Denmark  | Other unintentional injuries                    | 0 (0 to 1)  | 0 (0 to 0) | -26.5% (-33.4% to -20.4%) |
| Denmark  | Pedestrian road injuries                        | 0 (0 to 0)  | 0 (0 to 0) | -26.8% (-40% to -12.8%)   |
| Denmark  | Physical violence by firearm                    | 0 (0 to 0)  | 0 (0 to 0) | 24.2% (10.8% to 41.7%)    |
| Denmark  | Physical violence by other means                | 0 (0 to 0)  | 0 (0 to 0) | -26.6% (-35.1% to -18.9%) |
| Denmark  | Physical violence by sharp object               | 0 (0 to 0)  | 0 (0 to 0) | -22.1% (-33% to -12.1%)   |
| Denmark  | Poisoning by carbon monoxide                    | 0 (0 to 0)  | 0 (0 to 0) | 18.9% (8.8% to 29.6%)     |
| Denmark  | Poisoning by other means                        | 0 (0 to 0)  | 0 (0 to 0) | -1% (-7.4% to 6%)         |
| Denmark  | Pulmonary aspiration and foreign body in airway | 0 (0 to 0)  | 0 (0 to 0) | -4.1% (-12.7% to 4.6%)    |
| Denmark  | Self-harm by firearm                            | 0 (0 to 0)  | 0 (0 to 0) | -38.1% (-48.1% to -28.5%) |
| Denmark  | Self-harm by other specified means              | 0 (0 to 1)  | 0 (0 to 0) | -56% (-59.4% to -52.8%)   |
| Denmark  | Unintentional firearm injuries                  | 0 (0 to 0)  | 0 (0 to 0) | 3.4% (-6.5% to 12.7%)     |
| Denmark  | Venomous animal contact                         | 0 (0 to 0)  | 0 (0 to 0) | -6.7% (-12.3% to -1.3%)   |
| Djibouti | Adverse effects of medical treatment            | 0 (0 to 0)  | 0 (0 to 0) | 0% (0% to 0%)             |
| Djibouti | Conflict and terrorism                          | 4 (1 to 11) | 0 (0 to 0) | NA                        |
| Djibouti | Cyclist road injuries                           | 1 (1 to 3)  | 1 (1 to 3) | 10.7% (3.2% to 18.9%)     |
| Djibouti | Drowning                                        | 0 (0 to 0)  | 0 (0 to 0) | -2.8% (-10.7% to 5.2%)    |
| Djibouti | Environmental heat and cold exposure            | 0 (0 to 0)  | 0 (0 to 0) | -8.3% (-13.3% to -2.5%)   |
| Djibouti | Executions and police conflict                  | 0 (0 to 0)  | 0 (0 to 0) | NA                        |
| Djibouti | Exposure to forces of nature                    | 0 (0 to 0)  | 0 (0 to 0) | NA                        |
| Djibouti | Falls                                           | 3 (2 to 4)  | 4 (3 to 5) | 18.4% (14.2% to 23%)      |
| Djibouti | Fire, heat, and hot substances                  | 0 (0 to 0)  | 0 (0 to 0) | -14.4% (-19.3% to -9.8%)  |
| Djibouti | Foreign body in eyes                            | 0 (0 to 0)  | 0 (0 to 0) | 0% (0% to 0%)             |
| Djibouti | Foreign body in other body part                 | 1 (0 to 1)  | 1 (0 to 1) | 1.3% (-2.7% to 5.3%)      |
| Djibouti | Motor vehicle road injuries                     | 1 (1 to 3)  | 1 (1 to 3) | -6.1% (-12.9% to 1.5%)    |
| Djibouti | Motorcyclist road injuries                      | 1 (0 to 1)  | 1 (0 to 1) | 15.5% (6% to 25.7%)       |
| Djibouti | Non-venomous animal contact                     | 0 (0 to 1)  | 0 (0 to 1) | -5% (-9% to -0.4%)        |
| Djibouti | Other exposure to mechanical forces             | 0 (0 to 1)  | 0 (0 to 1) | -12.8% (-17.5% to -8.4%)  |
| Djibouti | Other road injuries                             | 0 (0 to 0)  | 0 (0 to 0) | 11% (1.9% to 20.3%)       |
| Djibouti | Other transport injuries                        | 0 (0 to 1)  | 0 (0 to 1) | -4% (-8% to 0.2%)         |
| Djibouti | Other unintentional injuries                    | 0 (0 to 1)  | 0 (0 to 0) | -14.2% (-18.4% to -9.5%)  |
| Djibouti | Pedestrian road injuries                        | 2 (1 to 5)  | 2 (1 to 4) | -14.9% (-20.5% to -9.1%)  |
| Djibouti | Physical violence by firearm                    | 0 (0 to 0)  | 0 (0 to 0) | 36.1% (22.5% to 53.5%)    |
| Djibouti | Physical violence by other means                | 0 (0 to 0)  | 0 (0 to 0) | 2.7% (-4.2% to 10.9%)     |
| Djibouti | Physical violence by sharp object               | 0 (0 to 0)  | 0 (0 to 0) | 4% (-5% to 12.3%)         |

|                    |                                                 |            |            |                           |
|--------------------|-------------------------------------------------|------------|------------|---------------------------|
| Djibouti           | Poisoning by carbon monoxide                    | 0 (0 to 0) | 0 (0 to 0) | 19.4% (7.3% to 34.5%)     |
| Djibouti           | Poisoning by other means                        | 0 (0 to 0) | 0 (0 to 0) | -19.6% (-25.9% to -12%)   |
| Djibouti           | Pulmonary aspiration and foreign body in airway | 0 (0 to 0) | 0 (0 to 0) | -11.9% (-20.9% to -1.7%)  |
| Djibouti           | Self-harm by firearm                            | 0 (0 to 0) | 0 (0 to 0) | 34% (20.2% to 55.1%)      |
| Djibouti           | Self-harm by other specified means              | 0 (0 to 0) | 0 (0 to 0) | 13.4% (8.1% to 20.1%)     |
| Djibouti           | Unintentional firearm injuries                  | 0 (0 to 0) | 0 (0 to 0) | -20.7% (-27.5% to -14.6%) |
| Djibouti           | Venomous animal contact                         | 0 (0 to 0) | 0 (0 to 0) | -9.8% (-15.5% to -3.7%)   |
| Dominica           | Adverse effects of medical treatment            | 0 (0 to 0) | 0 (0 to 0) | 0% (0% to 0%)             |
| Dominica           | Conflict and terrorism                          | 0 (0 to 0) | 0 (0 to 0) | NA                        |
| Dominica           | Cyclist road injuries                           | 0 (0 to 1) | 0 (0 to 0) | -13.6% (-21.3% to -5.3%)  |
| Dominica           | Drowning                                        | 0 (0 to 0) | 0 (0 to 0) | 9.6% (0.3% to 18.9%)      |
| Dominica           | Environmental heat and cold exposure            | 0 (0 to 0) | 0 (0 to 1) | 5.1% (1% to 9.6%)         |
| Dominica           | Executions and police conflict                  | 0 (0 to 0) | 0 (0 to 0) | NA                        |
| Dominica           | Exposure to forces of nature                    | 0 (0 to 0) | 0 (0 to 0) | NA                        |
| Dominica           | Falls                                           | 1 (1 to 1) | 1 (1 to 2) | 32.3% (27.3% to 36.9%)    |
| Dominica           | Fire, heat, and hot substances                  | 0 (0 to 0) | 0 (0 to 0) | -8.7% (-13% to -4.7%)     |
| Dominica           | Foreign body in eyes                            | 0 (0 to 0) | 0 (0 to 0) | 0% (0% to 0%)             |
| Dominica           | Foreign body in other body part                 | 0 (0 to 0) | 0 (0 to 0) | -3.8% (-7.3% to 0.2%)     |
| Dominica           | Motor vehicle road injuries                     | 1 (0 to 1) | 0 (0 to 1) | -12.6% (-20.8% to -4.1%)  |
| Dominica           | Motorcyclist road injuries                      | 0 (0 to 1) | 0 (0 to 1) | 18.7% (5.4% to 33%)       |
| Dominica           | Non-venomous animal contact                     | 0 (0 to 0) | 0 (0 to 0) | -7.5% (-12.3% to -2%)     |
| Dominica           | Other exposure to mechanical forces             | 0 (0 to 0) | 0 (0 to 1) | 19.9% (13.1% to 27.6%)    |
| Dominica           | Other road injuries                             | 0 (0 to 0) | 0 (0 to 0) | -9.6% (-18% to -0.2%)     |
| Dominica           | Other transport injuries                        | 0 (0 to 0) | 0 (0 to 0) | 2.7% (-2% to 7.1%)        |
| Dominica           | Other unintentional injuries                    | 0 (0 to 0) | 0 (0 to 0) | -2.3% (-7.4% to 3%)       |
| Dominica           | Pedestrian road injuries                        | 0 (0 to 0) | 0 (0 to 0) | -21.7% (-29.2% to -14.5%) |
| Dominica           | Physical violence by firearm                    | 0 (0 to 0) | 0 (0 to 0) | 79.3% (60.9% to 104.5%)   |
| Dominica           | Physical violence by other means                | 0 (0 to 0) | 0 (0 to 0) | 26.5% (16% to 37.6%)      |
| Dominica           | Physical violence by sharp object               | 0 (0 to 0) | 0 (0 to 0) | 34.4% (22.7% to 48.8%)    |
| Dominica           | Poisoning by carbon monoxide                    | 0 (0 to 0) | 0 (0 to 0) | 4.2% (-9.6% to 19.4%)     |
| Dominica           | Poisoning by other means                        | 0 (0 to 0) | 0 (0 to 0) | -52.4% (-58.1% to -46.3%) |
| Dominica           | Pulmonary aspiration and foreign body in airway | 0 (0 to 0) | 0 (0 to 0) | -16.9% (-24.5% to -9.5%)  |
| Dominica           | Self-harm by firearm                            | 0 (0 to 0) | 0 (0 to 0) | 7.8% (-2.4% to 20.7%)     |
| Dominica           | Self-harm by other specified means              | 0 (0 to 0) | 0 (0 to 0) | -2.9% (-9.1% to 3.3%)     |
| Dominica           | Unintentional firearm injuries                  | 0 (0 to 0) | 0 (0 to 0) | 14.8% (6.1% to 23.8%)     |
| Dominica           | Venomous animal contact                         | 0 (0 to 0) | 0 (0 to 0) | -7.7% (-13% to -2.4%)     |
| Dominican Republic | Adverse effects of medical treatment            | 0 (0 to 0) | 0 (0 to 0) | 0% (0% to 0%)             |
| Dominican Republic | Conflict and terrorism                          | 0 (0 to 0) | 0 (0 to 0) | NA                        |
| Dominican Republic | Cyclist road injuries                           | 0 (0 to 1) | 0 (0 to 0) | -10.2% (-20.3% to -0.2%)  |
| Dominican Republic | Drowning                                        | 0 (0 to 0) | 0 (0 to 0) | 56.2% (38.7% to 76.7%)    |
| Dominican Republic | Environmental heat and cold exposure            | 0 (0 to 0) | 0 (0 to 1) | 8% (3.8% to 11.7%)        |
| Dominican Republic | Executions and police conflict                  | 0 (0 to 0) | 0 (0 to 0) | NA                        |
| Dominican Republic | Exposure to forces of nature                    | 0 (0 to 0) | 0 (0 to 0) | NA                        |

|                    |                                                 |            |            |                           |
|--------------------|-------------------------------------------------|------------|------------|---------------------------|
| Dominican Republic | Falls                                           | 1 (1 to 1) | 1 (1 to 2) | 60.5% (55.5% to 66.6%)    |
| Dominican Republic | Fire, heat, and hot substances                  | 0 (0 to 0) | 0 (0 to 0) | 4.5% (-0.1% to 8.8%)      |
| Dominican Republic | Foreign body in eyes                            | 0 (0 to 0) | 0 (0 to 0) | 0% (0% to 0%)             |
| Dominican Republic | Foreign body in other body part                 | 0 (0 to 0) | 0 (0 to 0) | -4.2% (-8.1% to 0%)       |
| Dominican Republic | Motor vehicle road injuries                     | 1 (0 to 1) | 1 (1 to 2) | 35.2% (21.5% to 50.2%)    |
| Dominican Republic | Motorcyclist road injuries                      | 0 (0 to 0) | 0 (0 to 1) | 89.5% (65.5% to 121.1%)   |
| Dominican Republic | Non-venomous animal contact                     | 0 (0 to 0) | 0 (0 to 0) | -16.5% (-19.9% to -12.6%) |
| Dominican Republic | Other exposure to mechanical forces             | 0 (0 to 0) | 0 (0 to 1) | 29.8% (20.6% to 38.8%)    |
| Dominican Republic | Other road injuries                             | 0 (0 to 0) | 0 (0 to 0) | -7.6% (-18.2% to 4.5%)    |
| Dominican Republic | Other transport injuries                        | 0 (0 to 0) | 0 (0 to 0) | 2.2% (-2% to 7%)          |
| Dominican Republic | Other unintentional injuries                    | 0 (0 to 0) | 0 (0 to 0) | 3.7% (-2.5% to 10.8%)     |
| Dominican Republic | Pedestrian road injuries                        | 0 (0 to 0) | 0 (0 to 0) | -1.2% (-11.9% to 10.6%)   |
| Dominican Republic | Physical violence by firearm                    | 0 (0 to 0) | 0 (0 to 0) | 231.8% (174.6% to 313.4%) |
| Dominican Republic | Physical violence by other means                | 0 (0 to 0) | 0 (0 to 0) | 24.7% (8.8% to 39.6%)     |
| Dominican Republic | Physical violence by sharp object               | 0 (0 to 0) | 0 (0 to 0) | 38.8% (15.7% to 60%)      |
| Dominican Republic | Poisoning by carbon monoxide                    | 0 (0 to 0) | 0 (0 to 0) | 36.2% (20.9% to 53.4%)    |
| Dominican Republic | Poisoning by other means                        | 0 (0 to 0) | 0 (0 to 0) | 10.1% (1.8% to 17.7%)     |
| Dominican Republic | Pulmonary aspiration and foreign body in airway | 0 (0 to 0) | 0 (0 to 0) | -25% (-32.4% to -17.5%)   |
| Dominican Republic | Self-harm by firearm                            | 0 (0 to 0) | 0 (0 to 0) | 69.9% (50.9% to 96.4%)    |
| Dominican Republic | Self-harm by other specified means              | 0 (0 to 0) | 0 (0 to 0) | 40.5% (30.5% to 51.4%)    |
| Dominican Republic | Unintentional firearm injuries                  | 0 (0 to 0) | 0 (0 to 1) | 49.1% (38.1% to 64.9%)    |
| Dominican Republic | Venomous animal contact                         | 0 (0 to 0) | 0 (0 to 0) | -15.2% (-19.1% to -10.2%) |
| Ecuador            | Adverse effects of medical treatment            | 0 (0 to 0) | 0 (0 to 0) | 0% (0% to 0%)             |
| Ecuador            | Conflict and terrorism                          | 0 (0 to 0) | 0 (0 to 0) | NA                        |
| Ecuador            | Cyclist road injuries                           | 0 (0 to 0) | 0 (0 to 0) | 5% (-4.9% to 16.6%)       |
| Ecuador            | Drowning                                        | 0 (0 to 0) | 0 (0 to 0) | 30.5% (14.8% to 46.6%)    |
| Ecuador            | Environmental heat and cold exposure            | 0 (0 to 0) | 0 (0 to 0) | 6.5% (2.6% to 11.6%)      |
| Ecuador            | Executions and police conflict                  | 0 (0 to 0) | 0 (0 to 0) | NA                        |
| Ecuador            | Exposure to forces of nature                    | 0 (0 to 0) | 0 (0 to 0) | NA                        |
| Ecuador            | Falls                                           | 2 (1 to 2) | 2 (2 to 3) | 39.7% (34% to 45.4%)      |
| Ecuador            | Fire, heat, and hot substances                  | 0 (0 to 0) | 0 (0 to 0) | -5.4% (-11.1% to 0.4%)    |
| Ecuador            | Foreign body in eyes                            | 0 (0 to 0) | 0 (0 to 0) | 0% (0% to 0%)             |
| Ecuador            | Foreign body in other body part                 | 0 (0 to 0) | 0 (0 to 0) | -10.5% (-16.2% to -4.6%)  |
| Ecuador            | Motor vehicle road injuries                     | 0 (0 to 1) | 0 (0 to 1) | 22.5% (10.6% to 37.7%)    |
| Ecuador            | Motorcyclist road injuries                      | 0 (0 to 0) | 0 (0 to 0) | 110.9% (83.6% to 149.5%)  |
| Ecuador            | Non-venomous animal contact                     | 0 (0 to 0) | 0 (0 to 0) | -4.5% (-9.7% to 0.9%)     |
| Ecuador            | Other exposure to mechanical forces             | 0 (0 to 1) | 0 (0 to 1) | -0.4% (-8% to 7.5%)       |
| Ecuador            | Other road injuries                             | 0 (0 to 0) | 0 (0 to 0) | -2.9% (-13.8% to 9.7%)    |
| Ecuador            | Other transport injuries                        | 0 (0 to 0) | 0 (0 to 0) | 38.7% (27.4% to 51.7%)    |
| Ecuador            | Other unintentional injuries                    | 0 (0 to 0) | 0 (0 to 0) | -21.3% (-26.7% to -15.7%) |
| Ecuador            | Pedestrian road injuries                        | 0 (0 to 1) | 0 (0 to 0) | -35.7% (-42.8% to -28.3%) |
| Ecuador            | Physical violence by firearm                    | 0 (0 to 0) | 0 (0 to 0) | 29.7% (9.3% to 55.4%)     |
| Ecuador            | Physical violence by other means                | 0 (0 to 0) | 0 (0 to 0) | 7.1% (-5% to 19.2%)       |

|             |                                                 |              |            |                           |
|-------------|-------------------------------------------------|--------------|------------|---------------------------|
| Ecuador     | Physical violence by sharp object               | 0 (0 to 0)   | 0 (0 to 0) | -20.7% (-31.9% to -10.1%) |
| Ecuador     | Poisoning by carbon monoxide                    | 0 (0 to 0)   | 0 (0 to 0) | 51.5% (33% to 70.6%)      |
| Ecuador     | Poisoning by other means                        | 0 (0 to 0)   | 0 (0 to 0) | -4.3% (-11.2% to 3.2%)    |
| Ecuador     | Pulmonary aspiration and foreign body in airway | 0 (0 to 0)   | 0 (0 to 0) | -27.1% (-35.2% to -19.8%) |
| Ecuador     | Self-harm by firearm                            | 0 (0 to 0)   | 0 (0 to 0) | 44.4% (21% to 65.5%)      |
| Ecuador     | Self-harm by other specified means              | 0 (0 to 0)   | 0 (0 to 0) | 82.8% (67.3% to 104.7%)   |
| Ecuador     | Unintentional firearm injuries                  | 0 (0 to 0)   | 0 (0 to 0) | -10.7% (-19.5% to -1.8%)  |
| Ecuador     | Venomous animal contact                         | 0 (0 to 0)   | 0 (0 to 0) | 1.9% (-3.8% to 8.6%)      |
| Egypt       | Adverse effects of medical treatment            | 0 (0 to 0)   | 0 (0 to 0) | 0% (0% to 0%)             |
| Egypt       | Conflict and terrorism                          | 0 (0 to 0)   | 0 (0 to 1) | NA                        |
| Egypt       | Cyclist road injuries                           | 0 (0 to 0)   | 0 (0 to 0) | 6.5% (-3.7% to 18.2%)     |
| Egypt       | Drowning                                        | 0 (0 to 0)   | 0 (0 to 0) | 55.7% (29% to 84.9%)      |
| Egypt       | Environmental heat and cold exposure            | 0 (0 to 0)   | 0 (0 to 0) | -3.1% (-8.7% to 2.6%)     |
| Egypt       | Executions and police conflict                  | 0 (0 to 0)   | 0 (0 to 0) | NA                        |
| Egypt       | Exposure to forces of nature                    | 0 (0 to 0)   | 0 (0 to 0) | NA                        |
| Egypt       | Falls                                           | 1 (1 to 1)   | 1 (1 to 2) | 42.7% (37.3% to 48%)      |
| Egypt       | Fire, heat, and hot substances                  | 0 (0 to 0)   | 0 (0 to 0) | -14.5% (-21.4% to -7.2%)  |
| Egypt       | Foreign body in eyes                            | 0 (0 to 0)   | 0 (0 to 0) | 0% (0% to 0%)             |
| Egypt       | Foreign body in other body part                 | 0 (0 to 0)   | 0 (0 to 0) | 0.6% (-3.4% to 4.4%)      |
| Egypt       | Motor vehicle road injuries                     | 1 (0 to 1)   | 1 (0 to 1) | -10.6% (-17.5% to -3.4%)  |
| Egypt       | Motorcyclist road injuries                      | 0 (0 to 0)   | 0 (0 to 0) | 10.7% (-0.8% to 23.5%)    |
| Egypt       | Non-venomous animal contact                     | 0 (0 to 0)   | 0 (0 to 0) | -7.9% (-12.4% to -3.3%)   |
| Egypt       | Other exposure to mechanical forces             | 0 (0 to 0)   | 0 (0 to 0) | 15.7% (9.6% to 23.4%)     |
| Egypt       | Other road injuries                             | 0 (0 to 0)   | 0 (0 to 0) | 7% (-4.1% to 19.7%)       |
| Egypt       | Other transport injuries                        | 0 (0 to 0)   | 0 (0 to 0) | -28.2% (-32.9% to -22.9%) |
| Egypt       | Other unintentional injuries                    | 0 (0 to 0)   | 0 (0 to 0) | -6% (-11.5% to 0.3%)      |
| Egypt       | Pedestrian road injuries                        | 0 (0 to 1)   | 0 (0 to 1) | -15.9% (-24.3% to -7%)    |
| Egypt       | Physical violence by firearm                    | 0 (0 to 0)   | 0 (0 to 0) | 92.3% (67.4% to 125%)     |
| Egypt       | Physical violence by other means                | 0 (0 to 0)   | 0 (0 to 0) | -4.8% (-12.8% to 2.2%)    |
| Egypt       | Physical violence by sharp object               | 0 (0 to 0)   | 0 (0 to 0) | -12.9% (-22.2% to -4.8%)  |
| Egypt       | Poisoning by carbon monoxide                    | 0 (0 to 0)   | 0 (0 to 0) | 56.1% (38.8% to 75.4%)    |
| Egypt       | Poisoning by other means                        | 0 (0 to 0)   | 0 (0 to 0) | -3.6% (-12.1% to 5.8%)    |
| Egypt       | Pulmonary aspiration and foreign body in airway | 0 (0 to 0)   | 0 (0 to 0) | -18.4% (-25.9% to -10%)   |
| Egypt       | Self-harm by firearm                            | 0 (0 to 0)   | 0 (0 to 0) | 40.5% (26.6% to 59.1%)    |
| Egypt       | Self-harm by other specified means              | 0 (0 to 0)   | 0 (0 to 0) | 4.2% (-3.2% to 11.6%)     |
| Egypt       | Unintentional firearm injuries                  | 0 (0 to 0)   | 0 (0 to 0) | -6% (-13.8% to 0.6%)      |
| Egypt       | Venomous animal contact                         | 0 (0 to 0)   | 0 (0 to 0) | -18.8% (-27.3% to -12.1%) |
| El Salvador | Adverse effects of medical treatment            | 0 (0 to 0)   | 0 (0 to 0) | 0% (0% to 0%)             |
| El Salvador | Conflict and terrorism                          | 11 (3 to 34) | 0 (0 to 0) | NA                        |
| El Salvador | Cyclist road injuries                           | 0 (0 to 0)   | 0 (0 to 0) | -23.7% (-32.4% to -14.7%) |
| El Salvador | Drowning                                        | 0 (0 to 0)   | 0 (0 to 0) | 61.1% (43.2% to 80%)      |
| El Salvador | Environmental heat and cold exposure            | 0 (0 to 0)   | 0 (0 to 0) | 2.8% (-1.7% to 6.9%)      |
| El Salvador | Executions and police conflict                  | 0 (0 to 0)   | 0 (0 to 0) | NA                        |



|                   |                                                 |            |            |                           |
|-------------------|-------------------------------------------------|------------|------------|---------------------------|
| El Salvador       | Exposure to forces of nature                    | 0 (0 to 0) | 0 (0 to 0) | NA                        |
| El Salvador       | Falls                                           | 2 (1 to 3) | 2 (2 to 3) | 22.4% (17.9% to 26.9%)    |
| El Salvador       | Fire, heat, and hot substances                  | 0 (0 to 0) | 0 (0 to 0) | -13.3% (-21.3% to -6.7%)  |
| El Salvador       | Foreign body in eyes                            | 0 (0 to 0) | 0 (0 to 0) | 0% (0% to 0%)             |
| El Salvador       | Foreign body in other body part                 | 0 (0 to 0) | 0 (0 to 0) | -13.6% (-17.1% to -9.7%)  |
| El Salvador       | Motor vehicle road injuries                     | 1 (0 to 1) | 1 (0 to 1) | -15.1% (-22.1% to -7.2%)  |
| El Salvador       | Motorcyclist road injuries                      | 0 (0 to 0) | 0 (0 to 0) | 5.9% (-5.7% to 19.1%)     |
| El Salvador       | Non-venomous animal contact                     | 0 (0 to 0) | 0 (0 to 0) | -18.5% (-22.6% to -14.7%) |
| El Salvador       | Other exposure to mechanical forces             | 0 (0 to 0) | 0 (0 to 1) | 4.9% (-3.7% to 12.5%)     |
| El Salvador       | Other road injuries                             | 0 (0 to 0) | 0 (0 to 0) | -24.1% (-32% to -14.8%)   |
| El Salvador       | Other transport injuries                        | 0 (0 to 0) | 0 (0 to 0) | -33.5% (-36.6% to -30.2%) |
| El Salvador       | Other unintentional injuries                    | 0 (0 to 0) | 0 (0 to 0) | -35.9% (-42.5% to -28.7%) |
| El Salvador       | Pedestrian road injuries                        | 0 (0 to 1) | 0 (0 to 0) | -34.4% (-41.6% to -26.8%) |
| El Salvador       | Physical violence by firearm                    | 0 (0 to 1) | 1 (0 to 1) | 144.5% (105.6% to 203.1%) |
| El Salvador       | Physical violence by other means                | 0 (0 to 1) | 0 (0 to 1) | 23.3% (7.6% to 40%)       |
| El Salvador       | Physical violence by sharp object               | 0 (0 to 1) | 0 (0 to 1) | 8.1% (-8.8% to 26%)       |
| El Salvador       | Poisoning by carbon monoxide                    | 0 (0 to 0) | 0 (0 to 0) | 30.8% (16.7% to 48.3%)    |
| El Salvador       | Poisoning by other means                        | 0 (0 to 0) | 0 (0 to 0) | 2.9% (-5.6% to 12.9%)     |
| El Salvador       | Pulmonary aspiration and foreign body in airway | 0 (0 to 0) | 0 (0 to 0) | -59.3% (-66.6% to -51.4%) |
| El Salvador       | Self-harm by firearm                            | 0 (0 to 0) | 0 (0 to 0) | 27.6% (9.4% to 53.4%)     |
| El Salvador       | Self-harm by other specified means              | 0 (0 to 0) | 0 (0 to 0) | -24.1% (-32% to -15.8%)   |
| El Salvador       | Unintentional firearm injuries                  | 0 (0 to 0) | 0 (0 to 0) | 14.4% (5.3% to 25.7%)     |
| El Salvador       | Venomous animal contact                         | 0 (0 to 0) | 0 (0 to 0) | -12.3% (-16.9% to -7.3%)  |
| Equatorial Guinea | Adverse effects of medical treatment            | 0 (0 to 0) | 0 (0 to 0) | 0% (0% to 0%)             |
| Equatorial Guinea | Conflict and terrorism                          | 0 (0 to 0) | 0 (0 to 0) | NA                        |
| Equatorial Guinea | Cyclist road injuries                           | 0 (0 to 0) | 0 (0 to 0) | 33.7% (22.6% to 46.6%)    |
| Equatorial Guinea | Drowning                                        | 0 (0 to 0) | 0 (0 to 0) | -7.7% (-20.1% to 4.5%)    |
| Equatorial Guinea | Environmental heat and cold exposure            | 0 (0 to 0) | 0 (0 to 0) | -7.9% (-14.9% to 0.3%)    |
| Equatorial Guinea | Executions and police conflict                  | 0 (0 to 0) | 0 (0 to 0) | NA                        |
| Equatorial Guinea | Exposure to forces of nature                    | 0 (0 to 0) | 0 (0 to 0) | NA                        |
| Equatorial Guinea | Falls                                           | 1 (1 to 1) | 1 (1 to 2) | 40.9% (35.2% to 46.7%)    |
| Equatorial Guinea | Fire, heat, and hot substances                  | 0 (0 to 0) | 0 (0 to 0) | -18.2% (-24.9% to -11.6%) |
| Equatorial Guinea | Foreign body in eyes                            | 0 (0 to 0) | 0 (0 to 0) | 0% (0% to 0%)             |
| Equatorial Guinea | Foreign body in other body part                 | 1 (0 to 1) | 0 (0 to 1) | -14.7% (-19.9% to -10.5%) |
| Equatorial Guinea | Motor vehicle road injuries                     | 1 (0 to 1) | 1 (0 to 1) | 17.9% (8.7% to 28.5%)     |
| Equatorial Guinea | Motorcyclist road injuries                      | 0 (0 to 0) | 0 (0 to 0) | 10.6% (-4.1% to 26.4%)    |
| Equatorial Guinea | Non-venomous animal contact                     | 0 (0 to 0) | 0 (0 to 0) | -55.1% (-58.5% to -51.5%) |
| Equatorial Guinea | Other exposure to mechanical forces             | 0 (0 to 0) | 0 (0 to 0) | -11% (-20% to -1%)        |
| Equatorial Guinea | Other road injuries                             | 0 (0 to 0) | 0 (0 to 0) | 40.1% (24.7% to 58.5%)    |
| Equatorial Guinea | Other transport injuries                        | 0 (0 to 0) | 0 (0 to 0) | -20.3% (-26.5% to -14%)   |
| Equatorial Guinea | Other unintentional injuries                    | 0 (0 to 0) | 0 (0 to 0) | -24.4% (-31.7% to -16.1%) |
| Equatorial Guinea | Pedestrian road injuries                        | 0 (0 to 1) | 0 (0 to 1) | -16% (-23.5% to -8.1%)    |
| Equatorial Guinea | Physical violence by firearm                    | 0 (0 to 0) | 0 (0 to 0) | 40.8% (20.7% to 64.8%)    |

|                   |                                                 |                 |            |                           |
|-------------------|-------------------------------------------------|-----------------|------------|---------------------------|
| Equatorial Guinea | Physical violence by other means                | 0 (0 to 0)      | 0 (0 to 0) | -5% (-12.7% to 2.5%)      |
| Equatorial Guinea | Physical violence by sharp object               | 0 (0 to 0)      | 0 (0 to 0) | 0.7% (-7.3% to 10.9%)     |
| Equatorial Guinea | Poisoning by carbon monoxide                    | 0 (0 to 0)      | 0 (0 to 0) | 28% (9.2% to 50.6%)       |
| Equatorial Guinea | Poisoning by other means                        | 0 (0 to 0)      | 0 (0 to 0) | -28% (-38.2% to -15.8%)   |
| Equatorial Guinea | Pulmonary aspiration and foreign body in airway | 0 (0 to 0)      | 0 (0 to 0) | -52.2% (-59.6% to -43.8%) |
| Equatorial Guinea | Self-harm by firearm                            | 0 (0 to 0)      | 0 (0 to 0) | 55.5% (33.7% to 83.9%)    |
| Equatorial Guinea | Self-harm by other specified means              | 0 (0 to 0)      | 0 (0 to 0) | -9.6% (-17.9% to -2%)     |
| Equatorial Guinea | Unintentional firearm injuries                  | 0 (0 to 0)      | 0 (0 to 0) | -20.2% (-30.5% to -10.8%) |
| Equatorial Guinea | Venomous animal contact                         | 0 (0 to 0)      | 0 (0 to 0) | -51% (-56.9% to -43.3%)   |
| Eritrea           | Adverse effects of medical treatment            | 0 (0 to 0)      | 0 (0 to 0) | 0% (0% to 0%)             |
| Eritrea           | Conflict and terrorism                          | 100 (19 to 319) | 0 (0 to 0) | NA                        |
| Eritrea           | Cyclist road injuries                           | 1 (1 to 3)      | 2 (1 to 3) | 5% (-2.7% to 12.7%)       |
| Eritrea           | Drowning                                        | 0 (0 to 0)      | 0 (0 to 0) | -14.5% (-19.9% to -8.7%)  |
| Eritrea           | Environmental heat and cold exposure            | 0 (0 to 0)      | 0 (0 to 0) | -10% (-15% to -4.5%)      |
| Eritrea           | Executions and police conflict                  | 0 (0 to 0)      | 0 (0 to 0) | NA                        |
| Eritrea           | Exposure to forces of nature                    | 0 (0 to 0)      | 0 (0 to 0) | NA                        |
| Eritrea           | Falls                                           | 3 (2 to 4)      | 4 (2 to 5) | 28.4% (24.3% to 32.6%)    |
| Eritrea           | Fire, heat, and hot substances                  | 0 (0 to 0)      | 0 (0 to 0) | -11.1% (-15.7% to -7.4%)  |
| Eritrea           | Foreign body in eyes                            | 0 (0 to 0)      | 0 (0 to 0) | 0% (0% to 0%)             |
| Eritrea           | Foreign body in other body part                 | 1 (0 to 1)      | 1 (0 to 1) | -1.5% (-4.9% to 2.7%)     |
| Eritrea           | Motor vehicle road injuries                     | 1 (1 to 2)      | 1 (1 to 2) | 8.4% (-0.5% to 18%)       |
| Eritrea           | Motorcyclist road injuries                      | 1 (0 to 1)      | 1 (0 to 1) | 2.4% (-5.6% to 10.6%)     |
| Eritrea           | Non-venomous animal contact                     | 1 (0 to 1)      | 1 (0 to 1) | -12.8% (-16.4% to -9.2%)  |
| Eritrea           | Other exposure to mechanical forces             | 0 (0 to 1)      | 0 (0 to 1) | -6.5% (-11.1% to -1.3%)   |
| Eritrea           | Other road injuries                             | 0 (0 to 0)      | 0 (0 to 0) | 13.7% (2.9% to 24.6%)     |
| Eritrea           | Other transport injuries                        | 0 (0 to 1)      | 0 (0 to 1) | -8.9% (-12.8% to -4.6%)   |
| Eritrea           | Other unintentional injuries                    | 0 (0 to 1)      | 0 (0 to 0) | -14.1% (-18.6% to -9.6%)  |
| Eritrea           | Pedestrian road injuries                        | 2 (1 to 4)      | 2 (1 to 4) | -0.1% (-6.9% to 6.2%)     |
| Eritrea           | Physical violence by firearm                    | 0 (0 to 0)      | 0 (0 to 0) | 45.5% (32.5% to 59.9%)    |
| Eritrea           | Physical violence by other means                | 0 (0 to 0)      | 0 (0 to 0) | 37.1% (28.3% to 45.8%)    |
| Eritrea           | Physical violence by sharp object               | 0 (0 to 0)      | 0 (0 to 0) | 40.4% (29.9% to 52.8%)    |
| Eritrea           | Poisoning by carbon monoxide                    | 0 (0 to 0)      | 0 (0 to 0) | 20% (8% to 33.3%)         |
| Eritrea           | Poisoning by other means                        | 0 (0 to 0)      | 0 (0 to 0) | -16.9% (-23.2% to -10.5%) |
| Eritrea           | Pulmonary aspiration and foreign body in airway | 0 (0 to 0)      | 0 (0 to 0) | -10.9% (-20.3% to -0.6%)  |
| Eritrea           | Self-harm by firearm                            | 0 (0 to 0)      | 0 (0 to 0) | 43% (26.3% to 64.4%)      |
| Eritrea           | Self-harm by other specified means              | 0 (0 to 0)      | 0 (0 to 0) | 19.4% (13.1% to 25.1%)    |
| Eritrea           | Unintentional firearm injuries                  | 0 (0 to 0)      | 0 (0 to 0) | -22.6% (-29.1% to -16.1%) |
| Eritrea           | Venomous animal contact                         | 0 (0 to 0)      | 0 (0 to 0) | -12.8% (-19.2% to -5.4%)  |
| Estonia           | Adverse effects of medical treatment            | 0 (0 to 0)      | 0 (0 to 0) | 0% (0% to 0%)             |
| Estonia           | Conflict and terrorism                          | 0 (0 to 0)      | 0 (0 to 0) | NA                        |
| Estonia           | Cyclist road injuries                           | 1 (0 to 1)      | 0 (0 to 1) | -38.7% (-47.3% to -29.3%) |
| Estonia           | Drowning                                        | 0 (0 to 0)      | 0 (0 to 0) | -7.7% (-18.8% to 4.4%)    |
| Estonia           | Environmental heat and cold exposure            | 0 (0 to 1)      | 0 (0 to 0) | -10.9% (-16.7% to -5.5%)  |

|          |                                                 |             |            |                           |
|----------|-------------------------------------------------|-------------|------------|---------------------------|
| Estonia  | Executions and police conflict                  | 0 (0 to 0)  | 0 (0 to 0) | NA                        |
| Estonia  | Exposure to forces of nature                    | 0 (0 to 0)  | 0 (0 to 0) | NA                        |
| Estonia  | Falls                                           | 7 (6 to 10) | 6 (4 to 7) | -23.8% (-28% to -19.1%)   |
| Estonia  | Fire, heat, and hot substances                  | 0 (0 to 0)  | 0 (0 to 0) | -47.4% (-52.4% to -42.1%) |
| Estonia  | Foreign body in eyes                            | 0 (0 to 0)  | 0 (0 to 0) | 0% (0% to 0%)             |
| Estonia  | Foreign body in other body part                 | 0 (0 to 0)  | 0 (0 to 0) | 2% (-2% to 7.2%)          |
| Estonia  | Motor vehicle road injuries                     | 3 (2 to 5)  | 1 (1 to 2) | -57.8% (-64.3% to -51.5%) |
| Estonia  | Motorcyclist road injuries                      | 0 (0 to 0)  | 0 (0 to 0) | -35.2% (-47.5% to -21.8%) |
| Estonia  | Non-venomous animal contact                     | 0 (0 to 0)  | 0 (0 to 0) | -7.2% (-11.1% to -3.1%)   |
| Estonia  | Other exposure to mechanical forces             | 1 (1 to 2)  | 1 (0 to 2) | -22.2% (-30% to -15.1%)   |
| Estonia  | Other road injuries                             | 0 (0 to 0)  | 0 (0 to 0) | -12.3% (-24.5% to 1.5%)   |
| Estonia  | Other transport injuries                        | 0 (0 to 0)  | 0 (0 to 0) | -35% (-41.5% to -28%)     |
| Estonia  | Other unintentional injuries                    | 0 (0 to 0)  | 0 (0 to 0) | -14.9% (-24.7% to -4.2%)  |
| Estonia  | Pedestrian road injuries                        | 1 (0 to 2)  | 0 (0 to 1) | -64.9% (-70.6% to -58.8%) |
| Estonia  | Physical violence by firearm                    | 0 (0 to 0)  | 0 (0 to 0) | -53.6% (-66.6% to -38.2%) |
| Estonia  | Physical violence by other means                | 1 (0 to 1)  | 0 (0 to 1) | -48.7% (-55.3% to -39.9%) |
| Estonia  | Physical violence by sharp object               | 0 (0 to 1)  | 0 (0 to 0) | -58.2% (-66% to -49.8%)   |
| Estonia  | Poisoning by carbon monoxide                    | 0 (0 to 0)  | 0 (0 to 0) | 22.9% (1.5% to 43.4%)     |
| Estonia  | Poisoning by other means                        | 0 (0 to 0)  | 0 (0 to 0) | 6.3% (-5.8% to 17.5%)     |
| Estonia  | Pulmonary aspiration and foreign body in airway | 0 (0 to 0)  | 0 (0 to 0) | -43.6% (-50.5% to -35.5%) |
| Estonia  | Self-harm by firearm                            | 0 (0 to 0)  | 0 (0 to 0) | -44.1% (-53.7% to -33.7%) |
| Estonia  | Self-harm by other specified means              | 1 (0 to 1)  | 0 (0 to 1) | -46.8% (-50.3% to -42.5%) |
| Estonia  | Unintentional firearm injuries                  | 0 (0 to 0)  | 0 (0 to 0) | -11.9% (-24.7% to 0.8%)   |
| Estonia  | Venomous animal contact                         | 0 (0 to 0)  | 0 (0 to 0) | -9% (-14.5% to -3.4%)     |
| Eswatini | Adverse effects of medical treatment            | 0 (0 to 0)  | 0 (0 to 0) | 0% (0% to 0%)             |
| Eswatini | Conflict and terrorism                          | 0 (0 to 0)  | 0 (0 to 0) | NA                        |
| Eswatini | Cyclist road injuries                           | 0 (0 to 1)  | 1 (0 to 1) | 26.9% (16.8% to 39.1%)    |
| Eswatini | Drowning                                        | 0 (0 to 0)  | 0 (0 to 0) | -2.2% (-8.6% to 3.8%)     |
| Eswatini | Environmental heat and cold exposure            | 0 (0 to 0)  | 0 (0 to 0) | -1% (-6% to 3.9%)         |
| Eswatini | Executions and police conflict                  | 0 (0 to 0)  | 0 (0 to 0) | NA                        |
| Eswatini | Exposure to forces of nature                    | 0 (0 to 0)  | 0 (0 to 0) | NA                        |
| Eswatini | Falls                                           | 2 (2 to 3)  | 3 (2 to 4) | 18.8% (14.7% to 23.3%)    |
| Eswatini | Fire, heat, and hot substances                  | 0 (0 to 0)  | 0 (0 to 0) | 0.5% (-6% to 6.2%)        |
| Eswatini | Foreign body in eyes                            | 0 (0 to 0)  | 0 (0 to 0) | 0% (0% to 0%)             |
| Eswatini | Foreign body in other body part                 | 1 (0 to 1)  | 1 (0 to 1) | -1% (-4.8% to 2.6%)       |
| Eswatini | Motor vehicle road injuries                     | 1 (0 to 2)  | 1 (1 to 2) | 25.4% (15.8% to 36.5%)    |
| Eswatini | Motorcyclist road injuries                      | 0 (0 to 1)  | 0 (0 to 1) | 54.9% (38.8% to 75.4%)    |
| Eswatini | Non-venomous animal contact                     | 0 (0 to 0)  | 0 (0 to 0) | -6% (-10.4% to -0.9%)     |
| Eswatini | Other exposure to mechanical forces             | 0 (0 to 1)  | 0 (0 to 0) | -4.4% (-9.6% to 1%)       |
| Eswatini | Other road injuries                             | 0 (0 to 0)  | 0 (0 to 0) | 12.4% (2.9% to 22.7%)     |
| Eswatini | Other transport injuries                        | 0 (0 to 1)  | 0 (0 to 1) | 6.4% (1.2% to 11.6%)      |
| Eswatini | Other unintentional injuries                    | 0 (0 to 0)  | 0 (0 to 0) | -9.8% (-14.3% to -5.1%)   |
| Eswatini | Pedestrian road injuries                        | 1 (1 to 2)  | 2 (1 to 3) | 15.6% (7.2% to 24%)       |

|          |                                                 |                |            |                           |
|----------|-------------------------------------------------|----------------|------------|---------------------------|
| Eswatini | Physical violence by firearm                    | 0 (0 to 0)     | 0 (0 to 0) | -16% (-25.7% to -5.1%)    |
| Eswatini | Physical violence by other means                | 0 (0 to 1)     | 0 (0 to 1) | -12.6% (-20.6% to -3.1%)  |
| Eswatini | Physical violence by sharp object               | 0 (0 to 0)     | 0 (0 to 0) | -5.3% (-16% to 7%)        |
| Eswatini | Poisoning by carbon monoxide                    | 0 (0 to 0)     | 0 (0 to 0) | 6.3% (-6.3% to 21%)       |
| Eswatini | Poisoning by other means                        | 0 (0 to 0)     | 0 (0 to 0) | -6.2% (-13.7% to 2.1%)    |
| Eswatini | Pulmonary aspiration and foreign body in airway | 0 (0 to 0)     | 0 (0 to 0) | 0.5% (-7% to 8.7%)        |
| Eswatini | Self-harm by firearm                            | 0 (0 to 0)     | 0 (0 to 0) | 49.1% (30% to 76%)        |
| Eswatini | Self-harm by other specified means              | 0 (0 to 0)     | 0 (0 to 0) | 41.7% (32.9% to 52.1%)    |
| Eswatini | Unintentional firearm injuries                  | 0 (0 to 0)     | 0 (0 to 0) | -10.9% (-18.2% to -2.5%)  |
| Eswatini | Venomous animal contact                         | 0 (0 to 0)     | 0 (0 to 0) | -14% (-19.9% to -7.1%)    |
| Ethiopia | Adverse effects of medical treatment            | 0 (0 to 0)     | 0 (0 to 0) | 0% (0% to 0%)             |
| Ethiopia | Conflict and terrorism                          | 67 (16 to 185) | 0 (0 to 0) | NA                        |
| Ethiopia | Cyclist road injuries                           | 1 (0 to 1)     | 0 (0 to 1) | -22.9% (-26.3% to -19.6%) |
| Ethiopia | Drowning                                        | 0 (0 to 0)     | 0 (0 to 0) | -31% (-36.1% to -26.1%)   |
| Ethiopia | Environmental heat and cold exposure            | 0 (0 to 0)     | 0 (0 to 0) | -16.1% (-22% to -9.7%)    |
| Ethiopia | Executions and police conflict                  | 0 (0 to 0)     | 0 (0 to 0) | NA                        |
| Ethiopia | Exposure to forces of nature                    | 0 (0 to 0)     | 0 (0 to 0) | NA                        |
| Ethiopia | Falls                                           | 1 (1 to 2)     | 1 (1 to 2) | 7.4% (4.5% to 10.5%)      |
| Ethiopia | Fire, heat, and hot substances                  | 0 (0 to 0)     | 0 (0 to 0) | -23.7% (-27.4% to -20%)   |
| Ethiopia | Foreign body in eyes                            | 0 (0 to 0)     | 0 (0 to 0) | 0% (0% to 0%)             |
| Ethiopia | Foreign body in other body part                 | 0 (0 to 1)     | 0 (0 to 1) | -4.6% (-7.9% to -0.9%)    |
| Ethiopia | Motor vehicle road injuries                     | 1 (0 to 1)     | 1 (0 to 1) | -26.2% (-29.6% to -22.2%) |
| Ethiopia | Motorcyclist road injuries                      | 0 (0 to 0)     | 0 (0 to 0) | -29.8% (-33.5% to -25.8%) |
| Ethiopia | Non-venomous animal contact                     | 0 (0 to 1)     | 0 (0 to 1) | -34.5% (-36.7% to -32.2%) |
| Ethiopia | Other exposure to mechanical forces             | 0 (0 to 0)     | 0 (0 to 0) | -5.4% (-10.8% to 0.8%)    |
| Ethiopia | Other road injuries                             | 0 (0 to 0)     | 0 (0 to 0) | -2.3% (-8.5% to 4.2%)     |
| Ethiopia | Other transport injuries                        | 0 (0 to 0)     | 0 (0 to 0) | -23.6% (-27.4% to -20%)   |
| Ethiopia | Other unintentional injuries                    | 0 (0 to 0)     | 0 (0 to 0) | -29.6% (-32.6% to -26.7%) |
| Ethiopia | Pedestrian road injuries                        | 1 (0 to 1)     | 0 (0 to 1) | -39.8% (-43.1% to -36.4%) |
| Ethiopia | Physical violence by firearm                    | 0 (0 to 0)     | 0 (0 to 0) | -29.5% (-32.7% to -25.4%) |
| Ethiopia | Physical violence by other means                | 0 (0 to 0)     | 0 (0 to 0) | -28.2% (-31.4% to -24.9%) |
| Ethiopia | Physical violence by sharp object               | 0 (0 to 0)     | 0 (0 to 0) | -23.2% (-26.3% to -19.8%) |
| Ethiopia | Poisoning by carbon monoxide                    | 0 (0 to 0)     | 0 (0 to 0) | -3.9% (-12.5% to 6.2%)    |
| Ethiopia | Poisoning by other means                        | 0 (0 to 0)     | 0 (0 to 0) | -43.6% (-47.7% to -38.5%) |
| Ethiopia | Pulmonary aspiration and foreign body in airway | 0 (0 to 0)     | 0 (0 to 0) | -23.8% (-30.5% to -16.8%) |
| Ethiopia | Self-harm by firearm                            | 0 (0 to 0)     | 0 (0 to 0) | -19.2% (-26% to -10.8%)   |
| Ethiopia | Self-harm by other specified means              | 0 (0 to 0)     | 0 (0 to 0) | -43% (-45.7% to -40.1%)   |
| Ethiopia | Unintentional firearm injuries                  | 0 (0 to 0)     | 0 (0 to 0) | -28.6% (-34.7% to -23.2%) |
| Ethiopia | Venomous animal contact                         | 0 (0 to 0)     | 0 (0 to 0) | -38.4% (-43.5% to -33.3%) |
| Fiji     | Adverse effects of medical treatment            | 0 (0 to 0)     | 0 (0 to 0) | 0% (0% to 0%)             |
| Fiji     | Conflict and terrorism                          | 0 (0 to 0)     | 0 (0 to 0) | NA                        |
| Fiji     | Cyclist road injuries                           | 0 (0 to 0)     | 0 (0 to 0) | 0.3% (-6.7% to 9%)        |
| Fiji     | Drowning                                        | 0 (0 to 0)     | 0 (0 to 0) | 6.9% (-1.1% to 15.1%)     |

|         |                                                 |              |              |                           |
|---------|-------------------------------------------------|--------------|--------------|---------------------------|
| Fiji    | Environmental heat and cold exposure            | 0 (0 to 0)   | 0 (0 to 0)   | -0.7% (-5.4% to 5%)       |
| Fiji    | Executions and police conflict                  | 0 (0 to 0)   | 0 (0 to 0)   | NA                        |
| Fiji    | Exposure to forces of nature                    | 0 (0 to 0)   | 0 (0 to 0)   | NA                        |
| Fiji    | Falls                                           | 1 (1 to 1)   | 1 (1 to 2)   | 35.6% (31.2% to 40.8%)    |
| Fiji    | Fire, heat, and hot substances                  | 0 (0 to 0)   | 0 (0 to 0)   | -4.6% (-9.7% to 0.1%)     |
| Fiji    | Foreign body in eyes                            | 0 (0 to 0)   | 0 (0 to 0)   | 0% (0% to 0%)             |
| Fiji    | Foreign body in other body part                 | 0 (0 to 0)   | 0 (0 to 0)   | -4.2% (-7.4% to -0.3%)    |
| Fiji    | Motor vehicle road injuries                     | 0 (0 to 1)   | 0 (0 to 1)   | -19.3% (-25.3% to -13.4%) |
| Fiji    | Motorcyclist road injuries                      | 0 (0 to 0)   | 0 (0 to 0)   | 13.9% (4.2% to 25.8%)     |
| Fiji    | Non-venomous animal contact                     | 0 (0 to 0)   | 0 (0 to 0)   | -17.4% (-22.1% to -13.2%) |
| Fiji    | Other exposure to mechanical forces             | 0 (0 to 0)   | 0 (0 to 0)   | -18.8% (-24.8% to -13.6%) |
| Fiji    | Other road injuries                             | 0 (0 to 0)   | 0 (0 to 0)   | -2.3% (-11.7% to 8.5%)    |
| Fiji    | Other transport injuries                        | 0 (0 to 0)   | 0 (0 to 0)   | -3.7% (-8% to 0.7%)       |
| Fiji    | Other unintentional injuries                    | 0 (0 to 0)   | 0 (0 to 0)   | -20.3% (-24% to -16.1%)   |
| Fiji    | Pedestrian road injuries                        | 0 (0 to 0)   | 0 (0 to 0)   | -10.8% (-18.9% to -1.8%)  |
| Fiji    | Physical violence by firearm                    | 0 (0 to 0)   | 0 (0 to 0)   | 22.7% (11.1% to 36.6%)    |
| Fiji    | Physical violence by other means                | 0 (0 to 1)   | 0 (0 to 1)   | 8.4% (0.6% to 16.5%)      |
| Fiji    | Physical violence by sharp object               | 0 (0 to 0)   | 0 (0 to 0)   | 4.6% (-5.4% to 16.3%)     |
| Fiji    | Poisoning by carbon monoxide                    | 0 (0 to 0)   | 0 (0 to 0)   | 14.9% (4.3% to 25.8%)     |
| Fiji    | Poisoning by other means                        | 0 (0 to 0)   | 0 (0 to 0)   | -8.8% (-15.7% to -2.4%)   |
| Fiji    | Pulmonary aspiration and foreign body in airway | 0 (0 to 0)   | 0 (0 to 0)   | -5.5% (-14.4% to 4.5%)    |
| Fiji    | Self-harm by firearm                            | 0 (0 to 0)   | 0 (0 to 0)   | 12.5% (-2.1% to 31.4%)    |
| Fiji    | Self-harm by other specified means              | 0 (0 to 0)   | 0 (0 to 0)   | -12.2% (-18.2% to -6.1%)  |
| Fiji    | Unintentional firearm injuries                  | 0 (0 to 0)   | 0 (0 to 0)   | -8.3% (-13.7% to -2.4%)   |
| Fiji    | Venomous animal contact                         | 0 (0 to 0)   | 0 (0 to 0)   | -7.8% (-14.7% to -0.8%)   |
| Finland | Adverse effects of medical treatment            | 0 (0 to 0)   | 0 (0 to 0)   | 0% (0% to 0%)             |
| Finland | Conflict and terrorism                          | 0 (0 to 0)   | 0 (0 to 0)   | NA                        |
| Finland | Cyclist road injuries                           | 0 (0 to 1)   | 0 (0 to 0)   | -44.5% (-52.1% to -36.9%) |
| Finland | Drowning                                        | 0 (0 to 0)   | 0 (0 to 0)   | 80.4% (63.2% to 99.6%)    |
| Finland | Environmental heat and cold exposure            | 0 (0 to 0)   | 0 (0 to 0)   | 7.3% (1.5% to 13.9%)      |
| Finland | Executions and police conflict                  | 0 (0 to 0)   | 0 (0 to 0)   | NA                        |
| Finland | Exposure to forces of nature                    | 0 (0 to 0)   | 0 (0 to 0)   | NA                        |
| Finland | Falls                                           | 10 (7 to 13) | 10 (7 to 13) | 0.7% (-3.5% to 5.3%)      |
| Finland | Fire, heat, and hot substances                  | 0 (0 to 0)   | 0 (0 to 0)   | -26.5% (-31.6% to -21.3%) |
| Finland | Foreign body in eyes                            | 0 (0 to 0)   | 0 (0 to 0)   | 0% (0% to 0%)             |
| Finland | Foreign body in other body part                 | 0 (0 to 0)   | 0 (0 to 0)   | -0.8% (-4.6% to 3.2%)     |
| Finland | Motor vehicle road injuries                     | 1 (0 to 1)   | 0 (0 to 1)   | -47.4% (-54.1% to -40.8%) |
| Finland | Motorcyclist road injuries                      | 0 (0 to 0)   | 0 (0 to 0)   | -15.7% (-29.2% to -1.2%)  |
| Finland | Non-venomous animal contact                     | 0 (0 to 0)   | 0 (0 to 0)   | -19.7% (-23.1% to -16.3%) |
| Finland | Other exposure to mechanical forces             | 1 (0 to 1)   | 1 (0 to 1)   | -6.8% (-13% to -0.8%)     |
| Finland | Other road injuries                             | 0 (0 to 0)   | 0 (0 to 0)   | -17.2% (-27.2% to -5.3%)  |
| Finland | Other transport injuries                        | 0 (0 to 0)   | 0 (0 to 0)   | -34.7% (-40.1% to -28.4%) |
| Finland | Other unintentional injuries                    | 0 (0 to 1)   | 0 (0 to 0)   | -24.3% (-29.7% to -18.5%) |

|         |                                                 |             |             |                           |
|---------|-------------------------------------------------|-------------|-------------|---------------------------|
| Finland | Pedestrian road injuries                        | 0 (0 to 0)  | 0 (0 to 0)  | -32.3% (-42.9% to -20.7%) |
| Finland | Physical violence by firearm                    | 0 (0 to 0)  | 0 (0 to 0)  | 14% (-0.1% to 31.5%)      |
| Finland | Physical violence by other means                | 0 (0 to 1)  | 0 (0 to 0)  | -33.4% (-41% to -25.9%)   |
| Finland | Physical violence by sharp object               | 0 (0 to 0)  | 0 (0 to 0)  | -43.8% (-52.6% to -34.3%) |
| Finland | Poisoning by carbon monoxide                    | 0 (0 to 0)  | 0 (0 to 0)  | -75.9% (-82.6% to -67.3%) |
| Finland | Poisoning by other means                        | 0 (0 to 0)  | 0 (0 to 0)  | -43.2% (-52.2% to -34.1%) |
| Finland | Pulmonary aspiration and foreign body in airway | 0 (0 to 0)  | 0 (0 to 0)  | -20.8% (-27.5% to -14%)   |
| Finland | Self-harm by firearm                            | 0 (0 to 0)  | 0 (0 to 0)  | -61.3% (-68.9% to -53.7%) |
| Finland | Self-harm by other specified means              | 1 (0 to 1)  | 0 (0 to 1)  | -37% (-41% to -31.9%)     |
| Finland | Unintentional firearm injuries                  | 0 (0 to 0)  | 0 (0 to 0)  | 1.8% (-7.8% to 12.9%)     |
| Finland | Venomous animal contact                         | 0 (0 to 0)  | 0 (0 to 0)  | -14.3% (-19.9% to -8.1%)  |
| France  | Adverse effects of medical treatment            | 0 (0 to 0)  | 0 (0 to 0)  | 0% (0% to 0%)             |
| France  | Conflict and terrorism                          | 0 (0 to 0)  | 0 (0 to 0)  | NA                        |
| France  | Cyclist road injuries                           | 0 (0 to 0)  | 0 (0 to 0)  | -17.3% (-28.6% to -4.1%)  |
| France  | Drowning                                        | 0 (0 to 0)  | 0 (0 to 0)  | 103.6% (86.4% to 119.2%)  |
| France  | Environmental heat and cold exposure            | 0 (0 to 0)  | 0 (0 to 0)  | -15.7% (-20.9% to -9.9%)  |
| France  | Executions and police conflict                  | 0 (0 to 0)  | 0 (0 to 0)  | NA                        |
| France  | Exposure to forces of nature                    | 0 (0 to 0)  | 0 (0 to 0)  | NA                        |
| France  | Falls                                           | 8 (6 to 10) | 8 (6 to 11) | 2.5% (-1.8% to 7.3%)      |
| France  | Fire, heat, and hot substances                  | 0 (0 to 0)  | 0 (0 to 0)  | -12.9% (-17.7% to -7.7%)  |
| France  | Foreign body in eyes                            | 0 (0 to 0)  | 0 (0 to 0)  | 0% (0% to 0%)             |
| France  | Foreign body in other body part                 | 0 (0 to 0)  | 0 (0 to 0)  | 6% (2.3% to 10.3%)        |
| France  | Motor vehicle road injuries                     | 1 (0 to 1)  | 0 (0 to 1)  | -54.9% (-62.3% to -47.2%) |
| France  | Motorcyclist road injuries                      | 0 (0 to 0)  | 0 (0 to 0)  | -7% (-23.4% to 12.9%)     |
| France  | Non-venomous animal contact                     | 0 (0 to 0)  | 0 (0 to 0)  | -7.8% (-11% to -3.8%)     |
| France  | Other exposure to mechanical forces             | 1 (0 to 1)  | 1 (0 to 1)  | -7.4% (-13.6% to -1%)     |
| France  | Other road injuries                             | 0 (0 to 0)  | 0 (0 to 0)  | -7.8% (-22.5% to 7.9%)    |
| France  | Other transport injuries                        | 0 (0 to 0)  | 0 (0 to 0)  | 10.7% (6.4% to 15.2%)     |
| France  | Other unintentional injuries                    | 0 (0 to 1)  | 0 (0 to 0)  | -23.8% (-28.4% to -19.2%) |
| France  | Pedestrian road injuries                        | 0 (0 to 0)  | 0 (0 to 0)  | -60.9% (-67.9% to -52.8%) |
| France  | Physical violence by firearm                    | 0 (0 to 0)  | 0 (0 to 0)  | 17.6% (6.1% to 32.7%)     |
| France  | Physical violence by other means                | 0 (0 to 0)  | 0 (0 to 0)  | -27.6% (-35.8% to -20.9%) |
| France  | Physical violence by sharp object               | 0 (0 to 0)  | 0 (0 to 0)  | -21.4% (-31.7% to -11.8%) |
| France  | Poisoning by carbon monoxide                    | 0 (0 to 0)  | 0 (0 to 0)  | 12.9% (4.7% to 22%)       |
| France  | Poisoning by other means                        | 0 (0 to 0)  | 0 (0 to 0)  | 0.2% (-5.7% to 5.3%)      |
| France  | Pulmonary aspiration and foreign body in airway | 0 (0 to 0)  | 0 (0 to 0)  | -16.2% (-23.4% to -7.3%)  |
| France  | Self-harm by firearm                            | 0 (0 to 0)  | 0 (0 to 0)  | -44.1% (-52.7% to -34.9%) |
| France  | Self-harm by other specified means              | 0 (0 to 1)  | 0 (0 to 1)  | -29.1% (-33.1% to -24%)   |
| France  | Unintentional firearm injuries                  | 0 (0 to 0)  | 0 (0 to 0)  | -9.1% (-17.8% to -0.4%)   |
| France  | Venomous animal contact                         | 0 (0 to 0)  | 0 (0 to 0)  | -11.8% (-17.3% to -6.4%)  |
| Gabon   | Adverse effects of medical treatment            | 0 (0 to 0)  | 0 (0 to 0)  | 0% (0% to 0%)             |
| Gabon   | Conflict and terrorism                          | 0 (0 to 0)  | 0 (0 to 0)  | NA                        |
| Gabon   | Cyclist road injuries                           | 0 (0 to 0)  | 0 (0 to 0)  | 0.6% (-6.2% to 8.3%)      |



|        |                                                 |            |            |                           |
|--------|-------------------------------------------------|------------|------------|---------------------------|
| Gabon  | Drowning                                        | 0 (0 to 0) | 0 (0 to 0) | -14% (-21.3% to -6.3%)    |
| Gabon  | Environmental heat and cold exposure            | 0 (0 to 0) | 0 (0 to 0) | -7.5% (-12.2% to -1.5%)   |
| Gabon  | Executions and police conflict                  | 0 (0 to 0) | 0 (0 to 0) | NA                        |
| Gabon  | Exposure to forces of nature                    | 0 (0 to 0) | 0 (0 to 0) | NA                        |
| Gabon  | Falls                                           | 1 (1 to 2) | 1 (1 to 2) | 13.3% (9% to 17.1%)       |
| Gabon  | Fire, heat, and hot substances                  | 0 (0 to 0) | 0 (0 to 0) | -11% (-14.9% to -6.5%)    |
| Gabon  | Foreign body in eyes                            | 0 (0 to 0) | 0 (0 to 0) | 0% (0% to 0%)             |
| Gabon  | Foreign body in other body part                 | 0 (0 to 1) | 0 (0 to 1) | -2.2% (-5.9% to 1.1%)     |
| Gabon  | Motor vehicle road injuries                     | 1 (0 to 1) | 1 (0 to 1) | -3.1% (-8.4% to 3.8%)     |
| Gabon  | Motorcyclist road injuries                      | 0 (0 to 0) | 0 (0 to 0) | -6% (-14% to 3.4%)        |
| Gabon  | Non-venomous animal contact                     | 0 (0 to 0) | 0 (0 to 0) | -5.2% (-9.9% to -0.5%)    |
| Gabon  | Other exposure to mechanical forces             | 0 (0 to 0) | 0 (0 to 0) | -14.4% (-20% to -9%)      |
| Gabon  | Other road injuries                             | 0 (0 to 0) | 0 (0 to 0) | 3.2% (-4.8% to 12.5%)     |
| Gabon  | Other transport injuries                        | 0 (0 to 0) | 0 (0 to 0) | -11.6% (-15.7% to -7.5%)  |
| Gabon  | Other unintentional injuries                    | 0 (0 to 0) | 0 (0 to 0) | -13.5% (-19% to -7.8%)    |
| Gabon  | Pedestrian road injuries                        | 1 (0 to 1) | 0 (0 to 1) | -18.2% (-23.7% to -12.3%) |
| Gabon  | Physical violence by firearm                    | 0 (0 to 0) | 0 (0 to 0) | 13.8% (2.3% to 27%)       |
| Gabon  | Physical violence by other means                | 0 (0 to 0) | 0 (0 to 0) | -15.2% (-21% to -9.4%)    |
| Gabon  | Physical violence by sharp object               | 0 (0 to 0) | 0 (0 to 0) | -14.1% (-19.4% to -9%)    |
| Gabon  | Poisoning by carbon monoxide                    | 0 (0 to 0) | 0 (0 to 0) | 15.8% (4.6% to 29.3%)     |
| Gabon  | Poisoning by other means                        | 0 (0 to 0) | 0 (0 to 0) | -16.6% (-22.4% to -9.2%)  |
| Gabon  | Pulmonary aspiration and foreign body in airway | 0 (0 to 0) | 0 (0 to 0) | -11.9% (-20.1% to -2.2%)  |
| Gabon  | Self-harm by firearm                            | 0 (0 to 0) | 0 (0 to 0) | 0.3% (-10.1% to 12.3%)    |
| Gabon  | Self-harm by other specified means              | 0 (0 to 0) | 0 (0 to 0) | -13.2% (-17.9% to -7.8%)  |
| Gabon  | Unintentional firearm injuries                  | 0 (0 to 0) | 0 (0 to 0) | -12.5% (-18.1% to -6.7%)  |
| Gabon  | Venomous animal contact                         | 0 (0 to 0) | 0 (0 to 0) | -1.9% (-8.4% to 5.1%)     |
| Gambia | Adverse effects of medical treatment            | 0 (0 to 0) | 0 (0 to 0) | 0% (0% to 0%)             |
| Gambia | Conflict and terrorism                          | 0 (0 to 0) | 0 (0 to 0) | NA                        |
| Gambia | Cyclist road injuries                           | 1 (0 to 2) | 1 (0 to 2) | 14.4% (7.4% to 22.1%)     |
| Gambia | Drowning                                        | 0 (0 to 0) | 0 (0 to 0) | -1.3% (-8.6% to 6.3%)     |
| Gambia | Environmental heat and cold exposure            | 0 (0 to 0) | 0 (0 to 0) | -2.6% (-7.3% to 2.5%)     |
| Gambia | Executions and police conflict                  | 0 (0 to 0) | 0 (0 to 0) | NA                        |
| Gambia | Exposure to forces of nature                    | 0 (0 to 0) | 0 (0 to 0) | NA                        |
| Gambia | Falls                                           | 3 (2 to 4) | 3 (2 to 5) | 21.9% (17.4% to 26.7%)    |
| Gambia | Fire, heat, and hot substances                  | 0 (0 to 0) | 0 (0 to 0) | -1.3% (-6.3% to 3.5%)     |
| Gambia | Foreign body in eyes                            | 0 (0 to 0) | 0 (0 to 0) | 0% (0% to 0%)             |
| Gambia | Foreign body in other body part                 | 1 (0 to 1) | 1 (0 to 1) | 3.3% (-0.3% to 7.4%)      |
| Gambia | Motor vehicle road injuries                     | 1 (1 to 2) | 1 (1 to 3) | 10.2% (2% to 18.3%)       |
| Gambia | Motorcyclist road injuries                      | 1 (0 to 1) | 1 (0 to 1) | 14.4% (6.3% to 23.2%)     |
| Gambia | Non-venomous animal contact                     | 0 (0 to 0) | 0 (0 to 0) | -3.8% (-7.9% to 0.5%)     |
| Gambia | Other exposure to mechanical forces             | 0 (0 to 0) | 0 (0 to 0) | -11.1% (-15.5% to -6.6%)  |
| Gambia | Other road injuries                             | 0 (0 to 0) | 0 (0 to 0) | 3% (-4.8% to 11.3%)       |
| Gambia | Other transport injuries                        | 0 (0 to 0) | 0 (0 to 0) | -1.7% (-5.9% to 2.9%)     |

|         |                                                 |            |            |                           |
|---------|-------------------------------------------------|------------|------------|---------------------------|
| Gambia  | Other unintentional injuries                    | 0 (0 to 0) | 0 (0 to 0) | -5.3% (-9.9% to -0.3%)    |
| Gambia  | Pedestrian road injuries                        | 2 (1 to 3) | 2 (1 to 3) | 4.6% (-2.1% to 11%)       |
| Gambia  | Physical violence by firearm                    | 0 (0 to 0) | 0 (0 to 0) | 42.8% (22.4% to 66%)      |
| Gambia  | Physical violence by other means                | 0 (0 to 0) | 0 (0 to 0) | 2.1% (-2.4% to 6.6%)      |
| Gambia  | Physical violence by sharp object               | 0 (0 to 0) | 0 (0 to 0) | -0.5% (-5.9% to 4.7%)     |
| Gambia  | Poisoning by carbon monoxide                    | 0 (0 to 0) | 0 (0 to 0) | 10.6% (-1.5% to 23.6%)    |
| Gambia  | Poisoning by other means                        | 0 (0 to 0) | 0 (0 to 0) | -12.1% (-18.5% to -5.2%)  |
| Gambia  | Pulmonary aspiration and foreign body in airway | 0 (0 to 0) | 0 (0 to 0) | 9.7% (1.9% to 18.7%)      |
| Gambia  | Self-harm by firearm                            | 0 (0 to 0) | 0 (0 to 0) | 19.4% (7.5% to 32.2%)     |
| Gambia  | Self-harm by other specified means              | 0 (0 to 0) | 0 (0 to 0) | 17.2% (11.9% to 22.3%)    |
| Gambia  | Unintentional firearm injuries                  | 0 (0 to 0) | 0 (0 to 0) | -11.3% (-17.9% to -4.1%)  |
| Gambia  | Venomous animal contact                         | 0 (0 to 0) | 0 (0 to 0) | -3.3% (-9.9% to 3.9%)     |
| Georgia | Adverse effects of medical treatment            | 0 (0 to 0) | 0 (0 to 0) | 0% (0% to 0%)             |
| Georgia | Conflict and terrorism                          | 0 (0 to 0) | 0 (0 to 0) | NA                        |
| Georgia | Cyclist road injuries                           | 0 (0 to 0) | 0 (0 to 0) | -17.6% (-26.4% to -7.2%)  |
| Georgia | Drowning                                        | 0 (0 to 0) | 0 (0 to 0) | -18.3% (-28% to -8.1%)    |
| Georgia | Environmental heat and cold exposure            | 0 (0 to 0) | 0 (0 to 0) | -9.9% (-17.9% to -0.1%)   |
| Georgia | Executions and police conflict                  | 0 (0 to 0) | 0 (0 to 0) | NA                        |
| Georgia | Exposure to forces of nature                    | 0 (0 to 0) | 0 (0 to 0) | NA                        |
| Georgia | Falls                                           | 4 (3 to 5) | 5 (4 to 6) | 24.8% (18.5% to 31.8%)    |
| Georgia | Fire, heat, and hot substances                  | 0 (0 to 0) | 0 (0 to 0) | -25.3% (-31.4% to -18.9%) |
| Georgia | Foreign body in eyes                            | 0 (0 to 0) | 0 (0 to 0) | 0% (0% to 0%)             |
| Georgia | Foreign body in other body part                 | 0 (0 to 0) | 0 (0 to 0) | -32.6% (-38% to -28%)     |
| Georgia | Motor vehicle road injuries                     | 1 (1 to 2) | 1 (1 to 2) | -11.4% (-19.3% to -1.4%)  |
| Georgia | Motorcyclist road injuries                      | 0 (0 to 0) | 0 (0 to 0) | -25.2% (-36% to -12.3%)   |
| Georgia | Non-venomous animal contact                     | 0 (0 to 0) | 0 (0 to 0) | -13.5% (-23.7% to -0.6%)  |
| Georgia | Other exposure to mechanical forces             | 1 (0 to 1) | 1 (0 to 2) | 15.1% (6.7% to 25%)       |
| Georgia | Other road injuries                             | 0 (0 to 0) | 0 (0 to 0) | 6.4% (-5.3% to 20.4%)     |
| Georgia | Other transport injuries                        | 0 (0 to 0) | 0 (0 to 0) | 13.8% (2.3% to 27.1%)     |
| Georgia | Other unintentional injuries                    | 0 (0 to 0) | 0 (0 to 0) | 16.2% (8.2% to 24.8%)     |
| Georgia | Pedestrian road injuries                        | 0 (0 to 0) | 0 (0 to 1) | 10% (-2.1% to 25.1%)      |
| Georgia | Physical violence by firearm                    | 0 (0 to 0) | 0 (0 to 0) | -45% (-55.3% to -34.7%)   |
| Georgia | Physical violence by other means                | 0 (0 to 0) | 0 (0 to 0) | -20.9% (-30.6% to -11%)   |
| Georgia | Physical violence by sharp object               | 0 (0 to 0) | 0 (0 to 0) | -2.2% (-14.8% to 14%)     |
| Georgia | Poisoning by carbon monoxide                    | 0 (0 to 0) | 0 (0 to 0) | 9.2% (-6.5% to 29.8%)     |
| Georgia | Poisoning by other means                        | 0 (0 to 0) | 0 (0 to 0) | 24.4% (10.4% to 41.8%)    |
| Georgia | Pulmonary aspiration and foreign body in airway | 0 (0 to 0) | 0 (0 to 0) | 19.6% (6% to 33.6%)       |
| Georgia | Self-harm by firearm                            | 0 (0 to 0) | 0 (0 to 0) | 53.6% (31.7% to 91.7%)    |
| Georgia | Self-harm by other specified means              | 0 (0 to 0) | 0 (0 to 0) | 19.5% (12.8% to 27.6%)    |
| Georgia | Unintentional firearm injuries                  | 0 (0 to 0) | 0 (0 to 0) | -1.8% (-13.9% to 11.7%)   |
| Georgia | Venomous animal contact                         | 0 (0 to 0) | 0 (0 to 0) | -17.5% (-29.6% to -1.5%)  |
| Germany | Adverse effects of medical treatment            | 0 (0 to 0) | 0 (0 to 0) | 0% (0% to 0%)             |
| Germany | Conflict and terrorism                          | 0 (0 to 0) | 0 (0 to 0) | NA                        |

|         |                                                 |            |            |                           |
|---------|-------------------------------------------------|------------|------------|---------------------------|
| Germany | Cyclist road injuries                           | 0 (0 to 0) | 0 (0 to 0) | -33% (-43.1% to -22.3%)   |
| Germany | Drowning                                        | 0 (0 to 0) | 0 (0 to 0) | 58.1% (41.9% to 77.2%)    |
| Germany | Environmental heat and cold exposure            | 0 (0 to 0) | 0 (0 to 0) | -2% (-6.4% to 2.5%)       |
| Germany | Executions and police conflict                  | 0 (0 to 0) | 0 (0 to 0) | NA                        |
| Germany | Exposure to forces of nature                    | 0 (0 to 0) | 0 (0 to 0) | NA                        |
| Germany | Falls                                           | 6 (4 to 8) | 6 (5 to 9) | 10% (5.3% to 14.6%)       |
| Germany | Fire, heat, and hot substances                  | 0 (0 to 0) | 0 (0 to 0) | -10% (-15.3% to -5.2%)    |
| Germany | Foreign body in eyes                            | 0 (0 to 0) | 0 (0 to 0) | 0% (0% to 0%)             |
| Germany | Foreign body in other body part                 | 0 (0 to 0) | 0 (0 to 0) | 1.5% (-2.3% to 5.3%)      |
| Germany | Motor vehicle road injuries                     | 1 (0 to 1) | 0 (0 to 1) | -53% (-60.9% to -45%)     |
| Germany | Motorcyclist road injuries                      | 0 (0 to 0) | 0 (0 to 0) | -26.2% (-40.9% to -8.8%)  |
| Germany | Non-venomous animal contact                     | 0 (0 to 0) | 0 (0 to 0) | -10.7% (-14.6% to -6.4%)  |
| Germany | Other exposure to mechanical forces             | 0 (0 to 1) | 0 (0 to 1) | -0.8% (-6.9% to 4.1%)     |
| Germany | Other road injuries                             | 0 (0 to 0) | 0 (0 to 0) | -17.3% (-29.2% to -3.7%)  |
| Germany | Other transport injuries                        | 0 (0 to 0) | 0 (0 to 0) | -5.8% (-10.6% to -0.9%)   |
| Germany | Other unintentional injuries                    | 0 (0 to 0) | 0 (0 to 0) | -7.8% (-12.5% to -3.4%)   |
| Germany | Pedestrian road injuries                        | 0 (0 to 0) | 0 (0 to 0) | -42% (-51.9% to -30.6%)   |
| Germany | Physical violence by firearm                    | 0 (0 to 0) | 0 (0 to 0) | 30.3% (17.3% to 46.7%)    |
| Germany | Physical violence by other means                | 0 (0 to 0) | 0 (0 to 0) | -17.5% (-24.8% to -10.6%) |
| Germany | Physical violence by sharp object               | 0 (0 to 0) | 0 (0 to 0) | -23.3% (-32.8% to -14.4%) |
| Germany | Poisoning by carbon monoxide                    | 0 (0 to 0) | 0 (0 to 0) | 10.2% (2.7% to 18.5%)     |
| Germany | Poisoning by other means                        | 0 (0 to 0) | 0 (0 to 0) | -1.9% (-7% to 4.3%)       |
| Germany | Pulmonary aspiration and foreign body in airway | 0 (0 to 0) | 0 (0 to 0) | -10.2% (-17.9% to -2.4%)  |
| Germany | Self-harm by firearm                            | 0 (0 to 0) | 0 (0 to 0) | -5% (-16.4% to 8.8%)      |
| Germany | Self-harm by other specified means              | 0 (0 to 1) | 0 (0 to 0) | -24.7% (-28.7% to -20.5%) |
| Germany | Unintentional firearm injuries                  | 0 (0 to 0) | 0 (0 to 0) | 2.5% (-4.5% to 9.8%)      |
| Germany | Venomous animal contact                         | 0 (0 to 0) | 0 (0 to 0) | -13% (-18.6% to -6.4%)    |
| Ghana   | Adverse effects of medical treatment            | 0 (0 to 0) | 0 (0 to 0) | 0% (0% to 0%)             |
| Ghana   | Conflict and terrorism                          | 0 (0 to 0) | 0 (0 to 0) | NA                        |
| Ghana   | Cyclist road injuries                           | 1 (1 to 3) | 2 (1 to 3) | 28.2% (19.9% to 38.7%)    |
| Ghana   | Drowning                                        | 0 (0 to 0) | 0 (0 to 0) | 13.8% (4.2% to 23.6%)     |
| Ghana   | Environmental heat and cold exposure            | 0 (0 to 0) | 0 (0 to 0) | 1.4% (-3.2% to 6.4%)      |
| Ghana   | Executions and police conflict                  | 0 (0 to 0) | 0 (0 to 0) | NA                        |
| Ghana   | Exposure to forces of nature                    | 0 (0 to 0) | 0 (0 to 0) | NA                        |
| Ghana   | Falls                                           | 3 (2 to 4) | 4 (3 to 5) | 26.3% (21.4% to 31.2%)    |
| Ghana   | Fire, heat, and hot substances                  | 0 (0 to 0) | 0 (0 to 0) | -2% (-6.4% to 2.7%)       |
| Ghana   | Foreign body in eyes                            | 0 (0 to 0) | 0 (0 to 0) | 0% (0% to 0%)             |
| Ghana   | Foreign body in other body part                 | 1 (0 to 1) | 1 (0 to 1) | 2.6% (-0.9% to 6.3%)      |
| Ghana   | Motor vehicle road injuries                     | 2 (1 to 3) | 2 (1 to 4) | 21.5% (13.1% to 31.9%)    |
| Ghana   | Motorcyclist road injuries                      | 0 (0 to 1) | 1 (0 to 1) | 45.7% (35.4% to 57.9%)    |
| Ghana   | Non-venomous animal contact                     | 0 (0 to 0) | 0 (0 to 0) | -12.6% (-16.7% to -8.7%)  |
| Ghana   | Other exposure to mechanical forces             | 0 (0 to 0) | 0 (0 to 0) | -2.2% (-7.6% to 3.3%)     |
| Ghana   | Other road injuries                             | 0 (0 to 0) | 0 (0 to 0) | 21.8% (12.6% to 33.8%)    |

|           |                                                 |            |            |                           |
|-----------|-------------------------------------------------|------------|------------|---------------------------|
| Ghana     | Other transport injuries                        | 0 (0 to 1) | 0 (0 to 1) | 1.3% (-2.9% to 5.5%)      |
| Ghana     | Other unintentional injuries                    | 0 (0 to 0) | 0 (0 to 0) | -5.5% (-11.2% to 0.1%)    |
| Ghana     | Pedestrian road injuries                        | 2 (1 to 4) | 3 (1 to 5) | 17.6% (10.5% to 25.7%)    |
| Ghana     | Physical violence by firearm                    | 0 (0 to 0) | 0 (0 to 0) | 40.3% (20.3% to 61.8%)    |
| Ghana     | Physical violence by other means                | 0 (0 to 0) | 0 (0 to 0) | -4.8% (-11.2% to 1.4%)    |
| Ghana     | Physical violence by sharp object               | 0 (0 to 0) | 0 (0 to 0) | -7.2% (-15.1% to 0%)      |
| Ghana     | Poisoning by carbon monoxide                    | 0 (0 to 0) | 0 (0 to 0) | 20.8% (8.1% to 34.3%)     |
| Ghana     | Poisoning by other means                        | 0 (0 to 0) | 0 (0 to 0) | -8.8% (-15.1% to -1.8%)   |
| Ghana     | Pulmonary aspiration and foreign body in airway | 0 (0 to 0) | 0 (0 to 0) | -5.6% (-12.9% to 2.3%)    |
| Ghana     | Self-harm by firearm                            | 0 (0 to 0) | 0 (0 to 0) | 27.8% (15.8% to 43.2%)    |
| Ghana     | Self-harm by other specified means              | 0 (0 to 0) | 0 (0 to 0) | 27.1% (20.8% to 34.7%)    |
| Ghana     | Unintentional firearm injuries                  | 0 (0 to 0) | 0 (0 to 0) | -11.3% (-18.9% to -3.5%)  |
| Ghana     | Venomous animal contact                         | 0 (0 to 0) | 0 (0 to 0) | -19.5% (-25.6% to -13%)   |
| Greece    | Adverse effects of medical treatment            | 0 (0 to 0) | 0 (0 to 0) | 0% (0% to 0%)             |
| Greece    | Conflict and terrorism                          | 0 (0 to 0) | 0 (0 to 0) | NA                        |
| Greece    | Cyclist road injuries                           | 0 (0 to 0) | 0 (0 to 0) | -10.4% (-21.7% to 3.1%)   |
| Greece    | Drowning                                        | 0 (0 to 0) | 0 (0 to 0) | 67.6% (53.4% to 85.1%)    |
| Greece    | Environmental heat and cold exposure            | 0 (0 to 0) | 0 (0 to 0) | -4.7% (-9.3% to 0.1%)     |
| Greece    | Executions and police conflict                  | 0 (0 to 0) | 0 (0 to 0) | NA                        |
| Greece    | Exposure to forces of nature                    | 0 (0 to 0) | 0 (0 to 0) | NA                        |
| Greece    | Falls                                           | 5 (4 to 6) | 4 (3 to 6) | -7.7% (-12.8% to -2.8%)   |
| Greece    | Fire, heat, and hot substances                  | 0 (0 to 0) | 0 (0 to 0) | -18.4% (-23.3% to -13.8%) |
| Greece    | Foreign body in eyes                            | 0 (0 to 0) | 0 (0 to 0) | 0% (0% to 0%)             |
| Greece    | Foreign body in other body part                 | 0 (0 to 0) | 0 (0 to 0) | 0.4% (-3.6% to 3.8%)      |
| Greece    | Motor vehicle road injuries                     | 1 (0 to 1) | 0 (0 to 1) | -44.7% (-52.6% to -37.4%) |
| Greece    | Motorcyclist road injuries                      | 0 (0 to 0) | 0 (0 to 0) | 16.3% (-5.5% to 39.4%)    |
| Greece    | Non-venomous animal contact                     | 0 (0 to 0) | 0 (0 to 0) | -7.4% (-11.3% to -3.5%)   |
| Greece    | Other exposure to mechanical forces             | 0 (0 to 1) | 1 (0 to 1) | 7.1% (2.2% to 13%)        |
| Greece    | Other road injuries                             | 0 (0 to 0) | 0 (0 to 0) | -9.5% (-21.4% to 3.9%)    |
| Greece    | Other transport injuries                        | 0 (0 to 0) | 0 (0 to 0) | 12.7% (7.1% to 19.6%)     |
| Greece    | Other unintentional injuries                    | 0 (0 to 0) | 0 (0 to 0) | -23% (-29.7% to -17.8%)   |
| Greece    | Pedestrian road injuries                        | 0 (0 to 0) | 0 (0 to 0) | -39.6% (-47.9% to -30.2%) |
| Greece    | Physical violence by firearm                    | 0 (0 to 0) | 0 (0 to 0) | 9.8% (0.2% to 21.5%)      |
| Greece    | Physical violence by other means                | 0 (0 to 0) | 0 (0 to 0) | -4.9% (-10.9% to 2%)      |
| Greece    | Physical violence by sharp object               | 0 (0 to 0) | 0 (0 to 0) | -11.6% (-19.1% to -3.9%)  |
| Greece    | Poisoning by carbon monoxide                    | 0 (0 to 0) | 0 (0 to 0) | 4.8% (-3.1% to 12.6%)     |
| Greece    | Poisoning by other means                        | 0 (0 to 0) | 0 (0 to 0) | -7.7% (-13.8% to -2.4%)   |
| Greece    | Pulmonary aspiration and foreign body in airway | 0 (0 to 0) | 0 (0 to 0) | -38.4% (-45.2% to -29.6%) |
| Greece    | Self-harm by firearm                            | 0 (0 to 0) | 0 (0 to 0) | 8.9% (-0.3% to 20.4%)     |
| Greece    | Self-harm by other specified means              | 0 (0 to 0) | 0 (0 to 0) | 4.5% (0% to 10%)          |
| Greece    | Unintentional firearm injuries                  | 0 (0 to 0) | 0 (0 to 0) | -12.5% (-19% to -6.2%)    |
| Greece    | Venomous animal contact                         | 0 (0 to 0) | 0 (0 to 0) | -6.8% (-12.6% to -1.1%)   |
| Greenland | Adverse effects of medical treatment            | 0 (0 to 0) | 0 (0 to 0) | 0% (0% to 0%)             |

|           |                                                 |               |               |                           |
|-----------|-------------------------------------------------|---------------|---------------|---------------------------|
| Greenland | Conflict and terrorism                          | 0 (0 to 0)    | 0 (0 to 0)    | NA                        |
| Greenland | Cyclist road injuries                           | 0 (0 to 1)    | 0 (0 to 1)    | -17.5% (-26.2% to -7.9%)  |
| Greenland | Drowning                                        | 0 (0 to 0)    | 0 (0 to 0)    | -0.1% (-8.3% to 7.7%)     |
| Greenland | Environmental heat and cold exposure            | 0 (0 to 0)    | 0 (0 to 0)    | -27.9% (-31.5% to -24.4%) |
| Greenland | Executions and police conflict                  | 0 (0 to 0)    | 0 (0 to 0)    | NA                        |
| Greenland | Exposure to forces of nature                    | 0 (0 to 0)    | 0 (0 to 0)    | NA                        |
| Greenland | Falls                                           | 26 (17 to 37) | 23 (15 to 34) | -10.4% (-13.6% to -6.7%)  |
| Greenland | Fire, heat, and hot substances                  | 1 (0 to 1)    | 0 (0 to 1)    | -40.3% (-43.5% to -36.9%) |
| Greenland | Foreign body in eyes                            | 0 (0 to 0)    | 0 (0 to 0)    | 0% (0% to 0%)             |
| Greenland | Foreign body in other body part                 | 1 (0 to 1)    | 1 (0 to 1)    | 0.8% (-2.5% to 4%)        |
| Greenland | Motor vehicle road injuries                     | 1 (1 to 2)    | 1 (0 to 1)    | -25.9% (-32% to -19.2%)   |
| Greenland | Motorcyclist road injuries                      | 0 (0 to 1)    | 0 (0 to 1)    | -11.9% (-20.6% to -2.6%)  |
| Greenland | Non-venomous animal contact                     | 0 (0 to 1)    | 0 (0 to 0)    | -33.3% (-39.6% to -27.7%) |
| Greenland | Other exposure to mechanical forces             | 1 (1 to 2)    | 1 (0 to 2)    | -35% (-39.7% to -30.4%)   |
| Greenland | Other road injuries                             | 0 (0 to 0)    | 0 (0 to 0)    | -26.8% (-36.7% to -16.4%) |
| Greenland | Other transport injuries                        | 4 (2 to 7)    | 3 (2 to 4)    | -37.2% (-40.6% to -33.4%) |
| Greenland | Other unintentional injuries                    | 2 (1 to 3)    | 1 (1 to 2)    | -25% (-29.7% to -20.5%)   |
| Greenland | Pedestrian road injuries                        | 0 (0 to 1)    | 0 (0 to 0)    | -40.6% (-47.6% to -32.7%) |
| Greenland | Physical violence by firearm                    | 0 (0 to 0)    | 0 (0 to 0)    | 2.2% (-9.2% to 16.6%)     |
| Greenland | Physical violence by other means                | 1 (0 to 1)    | 1 (0 to 1)    | -28.4% (-32.9% to -23.2%) |
| Greenland | Physical violence by sharp object               | 0 (0 to 0)    | 0 (0 to 0)    | -33.3% (-40% to -25.1%)   |
| Greenland | Poisoning by carbon monoxide                    | 0 (0 to 0)    | 0 (0 to 0)    | -29.4% (-38.4% to -19.5%) |
| Greenland | Poisoning by other means                        | 0 (0 to 0)    | 0 (0 to 0)    | -31.6% (-37% to -26.3%)   |
| Greenland | Pulmonary aspiration and foreign body in airway | 0 (0 to 0)    | 0 (0 to 0)    | -24.3% (-30.1% to -19%)   |
| Greenland | Self-harm by firearm                            | 0 (0 to 0)    | 0 (0 to 0)    | -40.4% (-48.6% to -31.3%) |
| Greenland | Self-harm by other specified means              | 1 (0 to 2)    | 1 (0 to 1)    | -25.6% (-29% to -21.5%)   |
| Greenland | Unintentional firearm injuries                  | 0 (0 to 0)    | 0 (0 to 0)    | -59.9% (-66.3% to -53.7%) |
| Greenland | Venomous animal contact                         | 0 (0 to 0)    | 0 (0 to 0)    | 4.6% (-3.4% to 15.4%)     |
| Grenada   | Adverse effects of medical treatment            | 0 (0 to 0)    | 0 (0 to 0)    | 0% (0% to 0%)             |
| Grenada   | Conflict and terrorism                          | 0 (0 to 0)    | 0 (0 to 0)    | NA                        |
| Grenada   | Cyclist road injuries                           | 0 (0 to 1)    | 0 (0 to 0)    | -16.5% (-24.1% to -7%)    |
| Grenada   | Drowning                                        | 0 (0 to 0)    | 0 (0 to 0)    | 24.1% (11.2% to 37.3%)    |
| Grenada   | Environmental heat and cold exposure            | 0 (0 to 1)    | 0 (0 to 1)    | 8.9% (4.8% to 13.2%)      |
| Grenada   | Executions and police conflict                  | 0 (0 to 0)    | 0 (0 to 0)    | NA                        |
| Grenada   | Exposure to forces of nature                    | 0 (0 to 0)    | 0 (0 to 0)    | NA                        |
| Grenada   | Falls                                           | 1 (1 to 2)    | 2 (1 to 3)    | 68% (62% to 74.9%)        |
| Grenada   | Fire, heat, and hot substances                  | 0 (0 to 0)    | 0 (0 to 0)    | -11.7% (-17.1% to -5.6%)  |
| Grenada   | Foreign body in eyes                            | 0 (0 to 0)    | 0 (0 to 0)    | 0% (0% to 0%)             |
| Grenada   | Foreign body in other body part                 | 0 (0 to 0)    | 0 (0 to 0)    | -0.6% (-4.7% to 3.8%)     |
| Grenada   | Motor vehicle road injuries                     | 0 (0 to 1)    | 0 (0 to 1)    | -17% (-25% to -7.6%)      |
| Grenada   | Motorcyclist road injuries                      | 0 (0 to 0)    | 0 (0 to 0)    | 17.6% (4.3% to 35.9%)     |
| Grenada   | Non-venomous animal contact                     | 0 (0 to 0)    | 0 (0 to 0)    | 21.2% (9.3% to 37.8%)     |
| Grenada   | Other exposure to mechanical forces             | 0 (0 to 1)    | 1 (0 to 1)    | 41.4% (29.5% to 56.8%)    |

|         |                                                 |            |            |                           |
|---------|-------------------------------------------------|------------|------------|---------------------------|
| Grenada | Other road injuries                             | 0 (0 to 0) | 0 (0 to 0) | -10.8% (-20.2% to -0.2%)  |
| Grenada | Other transport injuries                        | 0 (0 to 0) | 0 (0 to 0) | 20.5% (13.4% to 28.6%)    |
| Grenada | Other unintentional injuries                    | 0 (0 to 0) | 0 (0 to 0) | -3.6% (-8.6% to 1.5%)     |
| Grenada | Pedestrian road injuries                        | 0 (0 to 0) | 0 (0 to 0) | -24.7% (-32% to -16.3%)   |
| Grenada | Physical violence by firearm                    | 0 (0 to 0) | 0 (0 to 0) | 50.8% (34.4% to 74.4%)    |
| Grenada | Physical violence by other means                | 0 (0 to 0) | 0 (0 to 0) | 71.1% (52% to 96.7%)      |
| Grenada | Physical violence by sharp object               | 0 (0 to 0) | 0 (0 to 0) | 9.4% (-3.5% to 24.2%)     |
| Grenada | Poisoning by carbon monoxide                    | 0 (0 to 0) | 0 (0 to 0) | 30.3% (9.8% to 52.8%)     |
| Grenada | Poisoning by other means                        | 0 (0 to 0) | 0 (0 to 0) | -32.7% (-43.7% to -21.9%) |
| Grenada | Pulmonary aspiration and foreign body in airway | 0 (0 to 0) | 0 (0 to 0) | -24.6% (-31.2% to -18%)   |
| Grenada | Self-harm by firearm                            | 0 (0 to 0) | 0 (0 to 0) | 7.7% (-3.5% to 21.7%)     |
| Grenada | Self-harm by other specified means              | 0 (0 to 0) | 0 (0 to 0) | -15.2% (-22.8% to -7.8%)  |
| Grenada | Unintentional firearm injuries                  | 0 (0 to 0) | 0 (0 to 1) | 6.7% (-7.4% to 18.5%)     |
| Grenada | Venomous animal contact                         | 0 (0 to 0) | 0 (0 to 0) | -8.1% (-16.2% to 0.1%)    |
| Guam    | Adverse effects of medical treatment            | 0 (0 to 0) | 0 (0 to 0) | 0% (0% to 0%)             |
| Guam    | Conflict and terrorism                          | 0 (0 to 0) | 0 (0 to 0) | NA                        |
| Guam    | Cyclist road injuries                           | 0 (0 to 1) | 0 (0 to 1) | -5.8% (-14.1% to 3.2%)    |
| Guam    | Drowning                                        | 0 (0 to 0) | 0 (0 to 0) | 5.4% (-2.5% to 14.1%)     |
| Guam    | Environmental heat and cold exposure            | 0 (0 to 0) | 0 (0 to 0) | 0.6% (-5% to 6.8%)        |
| Guam    | Executions and police conflict                  | 0 (0 to 0) | 0 (0 to 0) | NA                        |
| Guam    | Exposure to forces of nature                    | 0 (0 to 0) | 0 (0 to 0) | NA                        |
| Guam    | Falls                                           | 4 (3 to 5) | 5 (3 to 7) | 29.1% (24.3% to 33.4%)    |
| Guam    | Fire, heat, and hot substances                  | 0 (0 to 0) | 0 (0 to 0) | 9.3% (3.9% to 15.2%)      |
| Guam    | Foreign body in eyes                            | 0 (0 to 0) | 0 (0 to 0) | 0% (0% to 0%)             |
| Guam    | Foreign body in other body part                 | 0 (0 to 0) | 0 (0 to 0) | -2.9% (-8.4% to 1.1%)     |
| Guam    | Motor vehicle road injuries                     | 1 (1 to 2) | 1 (0 to 2) | -36.4% (-42.6% to -30.4%) |
| Guam    | Motorcyclist road injuries                      | 1 (0 to 2) | 1 (0 to 2) | 6.3% (-3.9% to 19.6%)     |
| Guam    | Non-venomous animal contact                     | 0 (0 to 0) | 0 (0 to 0) | -9.1% (-12.8% to -4.9%)   |
| Guam    | Other exposure to mechanical forces             | 0 (0 to 0) | 0 (0 to 0) | -27.5% (-33.6% to -21.6%) |
| Guam    | Other road injuries                             | 0 (0 to 0) | 0 (0 to 0) | -8.4% (-17.8% to 2.4%)    |
| Guam    | Other transport injuries                        | 0 (0 to 1) | 0 (0 to 1) | -13.2% (-18.4% to -8.7%)  |
| Guam    | Other unintentional injuries                    | 0 (0 to 0) | 0 (0 to 0) | -6.5% (-11.4% to -1.6%)   |
| Guam    | Pedestrian road injuries                        | 1 (0 to 1) | 1 (0 to 1) | -21.6% (-29% to -13.8%)   |
| Guam    | Physical violence by firearm                    | 0 (0 to 0) | 0 (0 to 0) | -52.1% (-61.8% to -42.7%) |
| Guam    | Physical violence by other means                | 1 (0 to 1) | 1 (0 to 1) | -10.7% (-16.7% to -3.7%)  |
| Guam    | Physical violence by sharp object               | 0 (0 to 0) | 0 (0 to 0) | -50% (-57.6% to -42.9%)   |
| Guam    | Poisoning by carbon monoxide                    | 0 (0 to 0) | 0 (0 to 0) | 9.3% (0.3% to 18.8%)      |
| Guam    | Poisoning by other means                        | 0 (0 to 0) | 0 (0 to 0) | -7.6% (-14% to -1.7%)     |
| Guam    | Pulmonary aspiration and foreign body in airway | 0 (0 to 0) | 0 (0 to 0) | -2.6% (-11.5% to 7.9%)    |
| Guam    | Self-harm by firearm                            | 0 (0 to 0) | 0 (0 to 0) | -5.2% (-25% to 14.6%)     |
| Guam    | Self-harm by other specified means              | 0 (0 to 0) | 0 (0 to 0) | 27% (16.4% to 40.3%)      |
| Guam    | Unintentional firearm injuries                  | 0 (0 to 0) | 0 (0 to 0) | -26.8% (-36.2% to -19.5%) |
| Guam    | Venomous animal contact                         | 0 (0 to 0) | 0 (0 to 0) | -12.6% (-19% to -6.2%)    |



|           |                                                 |             |            |                           |
|-----------|-------------------------------------------------|-------------|------------|---------------------------|
| Guatemala | Adverse effects of medical treatment            | 0 (0 to 0)  | 0 (0 to 0) | 0% (0% to 0%)             |
| Guatemala | Conflict and terrorism                          | 5 (1 to 15) | 0 (0 to 0) | NA                        |
| Guatemala | Cyclist road injuries                           | 0 (0 to 0)  | 0 (0 to 0) | -11.7% (-18.6% to -2.8%)  |
| Guatemala | Drowning                                        | 0 (0 to 0)  | 0 (0 to 0) | -2% (-14.4% to 10.7%)     |
| Guatemala | Environmental heat and cold exposure            | 0 (0 to 0)  | 0 (0 to 0) | 41.8% (30.1% to 53.8%)    |
| Guatemala | Executions and police conflict                  | 0 (0 to 0)  | 0 (0 to 0) | NA                        |
| Guatemala | Exposure to forces of nature                    | 0 (0 to 0)  | 0 (0 to 0) | NA                        |
| Guatemala | Falls                                           | 2 (2 to 3)  | 3 (2 to 4) | 10.6% (6.7% to 14.9%)     |
| Guatemala | Fire, heat, and hot substances                  | 0 (0 to 0)  | 0 (0 to 0) | -31.5% (-37.3% to -25.2%) |
| Guatemala | Foreign body in eyes                            | 0 (0 to 0)  | 0 (0 to 0) | 0% (0% to 0%)             |
| Guatemala | Foreign body in other body part                 | 0 (0 to 0)  | 0 (0 to 0) | -42% (-48.1% to -35.9%)   |
| Guatemala | Motor vehicle road injuries                     | 0 (0 to 1)  | 0 (0 to 1) | 24.2% (13.6% to 37.8%)    |
| Guatemala | Motorcyclist road injuries                      | 0 (0 to 0)  | 0 (0 to 0) | 32.8% (19.7% to 49%)      |
| Guatemala | Non-venomous animal contact                     | 0 (0 to 0)  | 0 (0 to 0) | -18.5% (-22.7% to -14.9%) |
| Guatemala | Other exposure to mechanical forces             | 0 (0 to 1)  | 0 (0 to 1) | 48.5% (33.3% to 67.6%)    |
| Guatemala | Other road injuries                             | 0 (0 to 0)  | 0 (0 to 0) | -3.7% (-15.3% to 10.8%)   |
| Guatemala | Other transport injuries                        | 0 (0 to 0)  | 0 (0 to 0) | 38.1% (23.7% to 56.3%)    |
| Guatemala | Other unintentional injuries                    | 0 (0 to 0)  | 0 (0 to 0) | -17.5% (-22.8% to -11.9%) |
| Guatemala | Pedestrian road injuries                        | 0 (0 to 0)  | 0 (0 to 0) | -24.8% (-33.5% to -15.8%) |
| Guatemala | Physical violence by firearm                    | 0 (0 to 0)  | 0 (0 to 1) | 143.8% (82% to 235.9%)    |
| Guatemala | Physical violence by other means                | 1 (0 to 1)  | 0 (0 to 0) | -68.4% (-75.8% to -61.1%) |
| Guatemala | Physical violence by sharp object               | 0 (0 to 1)  | 0 (0 to 0) | -29.7% (-46% to -11.3%)   |
| Guatemala | Poisoning by carbon monoxide                    | 0 (0 to 0)  | 0 (0 to 0) | 40.5% (21.7% to 65.7%)    |
| Guatemala | Poisoning by other means                        | 0 (0 to 0)  | 0 (0 to 0) | -4.8% (-11.8% to 2.4%)    |
| Guatemala | Pulmonary aspiration and foreign body in airway | 0 (0 to 0)  | 0 (0 to 0) | -55.1% (-59.8% to -49.7%) |
| Guatemala | Self-harm by firearm                            | 0 (0 to 0)  | 0 (0 to 0) | -15.9% (-34.3% to -0.8%)  |
| Guatemala | Self-harm by other specified means              | 0 (0 to 0)  | 0 (0 to 0) | 28.7% (16.4% to 43.6%)    |
| Guatemala | Unintentional firearm injuries                  | 0 (0 to 0)  | 0 (0 to 1) | 91.4% (69.7% to 122%)     |
| Guatemala | Venomous animal contact                         | 0 (0 to 0)  | 0 (0 to 0) | -11% (-15.3% to -6.2%)    |
| Guinea    | Adverse effects of medical treatment            | 0 (0 to 0)  | 0 (0 to 0) | 0% (0% to 0%)             |
| Guinea    | Conflict and terrorism                          | 0 (0 to 0)  | 0 (0 to 0) | NA                        |
| Guinea    | Cyclist road injuries                           | 1 (0 to 2)  | 1 (1 to 3) | 23.6% (15.3% to 32.9%)    |
| Guinea    | Drowning                                        | 0 (0 to 0)  | 0 (0 to 0) | -8.6% (-15.1% to -2.6%)   |
| Guinea    | Environmental heat and cold exposure            | 0 (0 to 0)  | 0 (0 to 0) | 6.3% (1.4% to 12.5%)      |
| Guinea    | Executions and police conflict                  | 0 (0 to 0)  | 0 (0 to 0) | NA                        |
| Guinea    | Exposure to forces of nature                    | 0 (0 to 0)  | 0 (0 to 0) | NA                        |
| Guinea    | Falls                                           | 2 (2 to 3)  | 3 (2 to 4) | 18.1% (13.8% to 22.1%)    |
| Guinea    | Fire, heat, and hot substances                  | 0 (0 to 0)  | 0 (0 to 0) | -0.4% (-6.2% to 5.3%)     |
| Guinea    | Foreign body in eyes                            | 0 (0 to 0)  | 0 (0 to 0) | 0% (0% to 0%)             |
| Guinea    | Foreign body in other body part                 | 1 (0 to 1)  | 1 (0 to 1) | 0.3% (-3.5% to 4.4%)      |
| Guinea    | Motor vehicle road injuries                     | 2 (1 to 3)  | 2 (1 to 3) | 19.8% (10.7% to 30.1%)    |
| Guinea    | Motorcyclist road injuries                      | 1 (0 to 1)  | 1 (0 to 2) | 27.4% (16.9% to 39.1%)    |
| Guinea    | Non-venomous animal contact                     | 0 (0 to 0)  | 0 (0 to 0) | 4.2% (-0.3% to 9.3%)      |

|               |                                                 |            |            |                           |
|---------------|-------------------------------------------------|------------|------------|---------------------------|
| Guinea        | Other exposure to mechanical forces             | 0 (0 to 0) | 0 (0 to 0) | -9.4% (-14.3% to -4.9%)   |
| Guinea        | Other road injuries                             | 0 (0 to 0) | 0 (0 to 0) | 12.9% (3.8% to 23.1%)     |
| Guinea        | Other transport injuries                        | 0 (0 to 1) | 0 (0 to 1) | -1.4% (-5% to 2.4%)       |
| Guinea        | Other unintentional injuries                    | 0 (0 to 1) | 0 (0 to 0) | -11.2% (-15.2% to -6.6%)  |
| Guinea        | Pedestrian road injuries                        | 2 (1 to 3) | 2 (1 to 4) | 13.4% (5.8% to 20.9%)     |
| Guinea        | Physical violence by firearm                    | 0 (0 to 0) | 0 (0 to 0) | 29.1% (17.8% to 41.7%)    |
| Guinea        | Physical violence by other means                | 0 (0 to 0) | 0 (0 to 0) | 20.5% (13.2% to 28.4%)    |
| Guinea        | Physical violence by sharp object               | 0 (0 to 0) | 0 (0 to 0) | 18.3% (9.6% to 27.7%)     |
| Guinea        | Poisoning by carbon monoxide                    | 0 (0 to 0) | 0 (0 to 0) | 10.1% (-1.8% to 23.6%)    |
| Guinea        | Poisoning by other means                        | 0 (0 to 0) | 0 (0 to 0) | -15% (-21.5% to -8.6%)    |
| Guinea        | Pulmonary aspiration and foreign body in airway | 0 (0 to 0) | 0 (0 to 0) | -3.6% (-13.2% to 7%)      |
| Guinea        | Self-harm by firearm                            | 0 (0 to 0) | 0 (0 to 0) | 31.6% (18.9% to 49.1%)    |
| Guinea        | Self-harm by other specified means              | 0 (0 to 0) | 0 (0 to 0) | 29.5% (23.3% to 36.3%)    |
| Guinea        | Unintentional firearm injuries                  | 0 (0 to 0) | 0 (0 to 0) | -13.5% (-19.9% to -6.9%)  |
| Guinea        | Venomous animal contact                         | 0 (0 to 0) | 0 (0 to 0) | 6.3% (-0.5% to 13.9%)     |
| Guinea-Bissau | Adverse effects of medical treatment            | 0 (0 to 0) | 0 (0 to 0) | 0% (0% to 0%)             |
| Guinea-Bissau | Conflict and terrorism                          | 0 (0 to 0) | 0 (0 to 0) | NA                        |
| Guinea-Bissau | Cyclist road injuries                           | 1 (1 to 3) | 1 (1 to 3) | 7.2% (-0.6% to 15.4%)     |
| Guinea-Bissau | Drowning                                        | 0 (0 to 0) | 0 (0 to 0) | -22.8% (-27.9% to -17.1%) |
| Guinea-Bissau | Environmental heat and cold exposure            | 0 (0 to 0) | 0 (0 to 0) | -1.8% (-6.7% to 3.3%)     |
| Guinea-Bissau | Executions and police conflict                  | 0 (0 to 0) | 0 (0 to 0) | NA                        |
| Guinea-Bissau | Exposure to forces of nature                    | 0 (0 to 0) | 0 (0 to 0) | NA                        |
| Guinea-Bissau | Falls                                           | 3 (2 to 4) | 3 (2 to 4) | 8.7% (4.9% to 12.9%)      |
| Guinea-Bissau | Fire, heat, and hot substances                  | 0 (0 to 0) | 0 (0 to 0) | -11.8% (-16.9% to -6.4%)  |
| Guinea-Bissau | Foreign body in eyes                            | 0 (0 to 0) | 0 (0 to 0) | 0% (0% to 0%)             |
| Guinea-Bissau | Foreign body in other body part                 | 1 (0 to 1) | 1 (0 to 1) | -1.9% (-5.3% to 2%)       |
| Guinea-Bissau | Motor vehicle road injuries                     | 2 (1 to 4) | 2 (1 to 4) | 3.8% (-3.8% to 11.7%)     |
| Guinea-Bissau | Motorcyclist road injuries                      | 1 (0 to 2) | 1 (0 to 2) | -5.1% (-12.1% to 3.8%)    |
| Guinea-Bissau | Non-venomous animal contact                     | 0 (0 to 1) | 0 (0 to 0) | -7.8% (-11.9% to -3.7%)   |
| Guinea-Bissau | Other exposure to mechanical forces             | 0 (0 to 0) | 0 (0 to 0) | -13.7% (-18.7% to -8.7%)  |
| Guinea-Bissau | Other road injuries                             | 0 (0 to 0) | 0 (0 to 0) | 2.7% (-5.8% to 12.5%)     |
| Guinea-Bissau | Other transport injuries                        | 0 (0 to 1) | 0 (0 to 1) | -16% (-19.6% to -12.4%)   |
| Guinea-Bissau | Other unintentional injuries                    | 0 (0 to 1) | 0 (0 to 0) | -17.6% (-21.4% to -12.9%) |
| Guinea-Bissau | Pedestrian road injuries                        | 3 (1 to 5) | 2 (1 to 5) | -2.7% (-8.8% to 3.9%)     |
| Guinea-Bissau | Physical violence by firearm                    | 0 (0 to 0) | 0 (0 to 0) | 13.4% (4.3% to 24.8%)     |
| Guinea-Bissau | Physical violence by other means                | 0 (0 to 0) | 0 (0 to 0) | 11% (4.8% to 18%)         |
| Guinea-Bissau | Physical violence by sharp object               | 0 (0 to 0) | 0 (0 to 0) | 10.8% (3.5% to 19.7%)     |
| Guinea-Bissau | Poisoning by carbon monoxide                    | 0 (0 to 0) | 0 (0 to 0) | 10.8% (-2.1% to 24.5%)    |
| Guinea-Bissau | Poisoning by other means                        | 0 (0 to 0) | 0 (0 to 0) | -24.6% (-30.7% to -17.5%) |
| Guinea-Bissau | Pulmonary aspiration and foreign body in airway | 0 (0 to 0) | 0 (0 to 0) | -15.1% (-23.6% to -5.7%)  |
| Guinea-Bissau | Self-harm by firearm                            | 0 (0 to 0) | 0 (0 to 0) | 13.6% (1.8% to 27.4%)     |
| Guinea-Bissau | Self-harm by other specified means              | 0 (0 to 0) | 0 (0 to 0) | 8.2% (3.8% to 13.2%)      |
| Guinea-Bissau | Unintentional firearm injuries                  | 0 (0 to 0) | 0 (0 to 0) | -21.1% (-27.5% to -14.7%) |

|               |                                                 |            |            |                           |
|---------------|-------------------------------------------------|------------|------------|---------------------------|
| Guinea-Bissau | Venomous animal contact                         | 0 (0 to 0) | 0 (0 to 0) | -9.4% (-15.1% to -2.2%)   |
| Guyana        | Adverse effects of medical treatment            | 0 (0 to 0) | 0 (0 to 0) | 0% (0% to 0%)             |
| Guyana        | Conflict and terrorism                          | 0 (0 to 0) | 0 (0 to 0) | NA                        |
| Guyana        | Cyclist road injuries                           | 0 (0 to 0) | 0 (0 to 0) | -1.2% (-10.4% to 9.4%)    |
| Guyana        | Drowning                                        | 0 (0 to 0) | 0 (0 to 0) | 19.6% (8.5% to 32.2%)     |
| Guyana        | Environmental heat and cold exposure            | 0 (0 to 1) | 0 (0 to 1) | -1.5% (-6.1% to 2.8%)     |
| Guyana        | Executions and police conflict                  | 0 (0 to 0) | 0 (0 to 0) | NA                        |
| Guyana        | Exposure to forces of nature                    | 0 (0 to 0) | 0 (0 to 0) | NA                        |
| Guyana        | Falls                                           | 2 (1 to 3) | 2 (2 to 3) | 22.4% (17.9% to 27.2%)    |
| Guyana        | Fire, heat, and hot substances                  | 0 (0 to 0) | 0 (0 to 0) | -14.3% (-19.7% to -8.2%)  |
| Guyana        | Foreign body in eyes                            | 0 (0 to 0) | 0 (0 to 0) | 0% (0% to 0%)             |
| Guyana        | Foreign body in other body part                 | 0 (0 to 0) | 0 (0 to 0) | -29.1% (-33% to -24.5%)   |
| Guyana        | Motor vehicle road injuries                     | 0 (0 to 1) | 0 (0 to 1) | 20% (9.2% to 33.3%)       |
| Guyana        | Motorcyclist road injuries                      | 0 (0 to 0) | 0 (0 to 1) | 63.2% (45.6% to 85.6%)    |
| Guyana        | Non-venomous animal contact                     | 0 (0 to 0) | 0 (0 to 0) | 23.9% (6.9% to 38.9%)     |
| Guyana        | Other exposure to mechanical forces             | 0 (0 to 0) | 0 (0 to 1) | 28.3% (20.3% to 37.1%)    |
| Guyana        | Other road injuries                             | 0 (0 to 0) | 0 (0 to 0) | 6% (-4.4% to 17.9%)       |
| Guyana        | Other transport injuries                        | 0 (0 to 0) | 0 (0 to 0) | 25.1% (18% to 32.1%)      |
| Guyana        | Other unintentional injuries                    | 0 (0 to 0) | 0 (0 to 0) | -23.7% (-28.4% to -18.9%) |
| Guyana        | Pedestrian road injuries                        | 0 (0 to 0) | 0 (0 to 0) | -23.2% (-31.1% to -14.1%) |
| Guyana        | Physical violence by firearm                    | 0 (0 to 0) | 0 (0 to 0) | 137.2% (102.8% to 186.3%) |
| Guyana        | Physical violence by other means                | 0 (0 to 0) | 0 (0 to 0) | -5% (-16.3% to 5.8%)      |
| Guyana        | Physical violence by sharp object               | 0 (0 to 0) | 0 (0 to 0) | 56.3% (35% to 82.2%)      |
| Guyana        | Poisoning by carbon monoxide                    | 0 (0 to 0) | 0 (0 to 0) | 28.5% (10.3% to 51.3%)    |
| Guyana        | Poisoning by other means                        | 0 (0 to 0) | 0 (0 to 0) | -10.2% (-20.2% to 0.2%)   |
| Guyana        | Pulmonary aspiration and foreign body in airway | 0 (0 to 0) | 0 (0 to 0) | -28.2% (-35.8% to -19%)   |
| Guyana        | Self-harm by firearm                            | 0 (0 to 0) | 0 (0 to 0) | 24.5% (5.6% to 47.8%)     |
| Guyana        | Self-harm by other specified means              | 0 (0 to 0) | 0 (0 to 0) | 12% (5.2% to 20.4%)       |
| Guyana        | Unintentional firearm injuries                  | 0 (0 to 0) | 0 (0 to 0) | 21.2% (11.7% to 30.2%)    |
| Guyana        | Venomous animal contact                         | 0 (0 to 0) | 0 (0 to 0) | 89.2% (69% to 115.2%)     |
| Haiti         | Adverse effects of medical treatment            | 0 (0 to 0) | 0 (0 to 0) | 0% (0% to 0%)             |
| Haiti         | Conflict and terrorism                          | 0 (0 to 0) | 0 (0 to 0) | NA                        |
| Haiti         | Cyclist road injuries                           | 0 (0 to 0) | 0 (0 to 0) | -4% (-11% to 3.5%)        |
| Haiti         | Drowning                                        | 0 (0 to 0) | 0 (0 to 0) | -25.3% (-33% to -15.5%)   |
| Haiti         | Environmental heat and cold exposure            | 0 (0 to 1) | 0 (0 to 1) | -8.5% (-11.7% to -5.1%)   |
| Haiti         | Executions and police conflict                  | 0 (0 to 0) | 0 (0 to 0) | NA                        |
| Haiti         | Exposure to forces of nature                    | 0 (0 to 0) | 0 (0 to 0) | NA                        |
| Haiti         | Falls                                           | 1 (1 to 1) | 1 (1 to 1) | 34.1% (29% to 39.2%)      |
| Haiti         | Fire, heat, and hot substances                  | 0 (0 to 0) | 0 (0 to 0) | -23.1% (-27.5% to -19.1%) |
| Haiti         | Foreign body in eyes                            | 0 (0 to 0) | 0 (0 to 0) | 0% (0% to 0%)             |
| Haiti         | Foreign body in other body part                 | 0 (0 to 0) | 0 (0 to 0) | 1.9% (-1.9% to 7.1%)      |
| Haiti         | Motor vehicle road injuries                     | 0 (0 to 1) | 0 (0 to 1) | -2.1% (-8.9% to 5.4%)     |
| Haiti         | Motorcyclist road injuries                      | 0 (0 to 0) | 0 (0 to 0) | 16.8% (9.1% to 27.3%)     |

|          |                                                 |            |            |                           |
|----------|-------------------------------------------------|------------|------------|---------------------------|
| Haiti    | Non-venomous animal contact                     | 0 (0 to 0) | 0 (0 to 0) | 6.1% (2% to 11.2%)        |
| Haiti    | Other exposure to mechanical forces             | 0 (0 to 1) | 0 (0 to 1) | 16.3% (8.4% to 28.6%)     |
| Haiti    | Other road injuries                             | 0 (0 to 0) | 0 (0 to 0) | 5.3% (-3.5% to 15.2%)     |
| Haiti    | Other transport injuries                        | 0 (0 to 0) | 0 (0 to 0) | -0.1% (-4.2% to 4.3%)     |
| Haiti    | Other unintentional injuries                    | 0 (0 to 0) | 0 (0 to 0) | -19.8% (-23.6% to -15.6%) |
| Haiti    | Pedestrian road injuries                        | 0 (0 to 0) | 0 (0 to 0) | -21.7% (-27.2% to -15.7%) |
| Haiti    | Physical violence by firearm                    | 0 (0 to 0) | 0 (0 to 0) | 18.8% (8.1% to 32.4%)     |
| Haiti    | Physical violence by other means                | 0 (0 to 0) | 0 (0 to 0) | -8.3% (-14.5% to -2%)     |
| Haiti    | Physical violence by sharp object               | 0 (0 to 0) | 0 (0 to 0) | 5.7% (-1.3% to 15%)       |
| Haiti    | Poisoning by carbon monoxide                    | 0 (0 to 0) | 0 (0 to 0) | 17.1% (2% to 32.5%)       |
| Haiti    | Poisoning by other means                        | 0 (0 to 0) | 0 (0 to 0) | -21.7% (-28.5% to -15.1%) |
| Haiti    | Pulmonary aspiration and foreign body in airway | 0 (0 to 0) | 0 (0 to 0) | -34.4% (-41.4% to -26.7%) |
| Haiti    | Self-harm by firearm                            | 0 (0 to 0) | 0 (0 to 0) | 0.6% (-10.8% to 11.7%)    |
| Haiti    | Self-harm by other specified means              | 0 (0 to 0) | 0 (0 to 0) | -6.2% (-12.4% to 0.4%)    |
| Haiti    | Unintentional firearm injuries                  | 0 (0 to 1) | 0 (0 to 1) | -17.2% (-24.8% to -10.9%) |
| Haiti    | Venomous animal contact                         | 0 (0 to 0) | 0 (0 to 0) | 6.4% (1.5% to 11.8%)      |
| Honduras | Adverse effects of medical treatment            | 0 (0 to 0) | 0 (0 to 0) | 0% (0% to 0%)             |
| Honduras | Conflict and terrorism                          | 0 (0 to 0) | 0 (0 to 0) | NA                        |
| Honduras | Cyclist road injuries                           | 0 (0 to 0) | 0 (0 to 0) | -13.7% (-22.4% to -4.8%)  |
| Honduras | Drowning                                        | 0 (0 to 0) | 0 (0 to 0) | 18.4% (4.5% to 36.8%)     |
| Honduras | Environmental heat and cold exposure            | 0 (0 to 0) | 0 (0 to 0) | 0.6% (-3.8% to 5.2%)      |
| Honduras | Executions and police conflict                  | 0 (0 to 0) | 0 (0 to 0) | NA                        |
| Honduras | Exposure to forces of nature                    | 0 (0 to 0) | 0 (0 to 0) | NA                        |
| Honduras | Falls                                           | 1 (1 to 2) | 2 (1 to 2) | 13.3% (8.3% to 18.3%)     |
| Honduras | Fire, heat, and hot substances                  | 0 (0 to 0) | 0 (0 to 0) | 2.9% (-4.6% to 10.4%)     |
| Honduras | Foreign body in eyes                            | 0 (0 to 0) | 0 (0 to 0) | 0% (0% to 0%)             |
| Honduras | Foreign body in other body part                 | 0 (0 to 0) | 0 (0 to 0) | 0.8% (-2.8% to 4.8%)      |
| Honduras | Motor vehicle road injuries                     | 0 (0 to 1) | 0 (0 to 1) | 3.1% (-5.8% to 12.2%)     |
| Honduras | Motorcyclist road injuries                      | 0 (0 to 0) | 0 (0 to 0) | 10.8% (-1% to 23.1%)      |
| Honduras | Non-venomous animal contact                     | 0 (0 to 0) | 0 (0 to 0) | -8.1% (-12.7% to -3.9%)   |
| Honduras | Other exposure to mechanical forces             | 0 (0 to 1) | 0 (0 to 1) | -1.1% (-9.3% to 9.3%)     |
| Honduras | Other road injuries                             | 0 (0 to 0) | 0 (0 to 0) | -17.4% (-25.5% to -8.4%)  |
| Honduras | Other transport injuries                        | 0 (0 to 0) | 0 (0 to 0) | -0.6% (-5% to 4.1%)       |
| Honduras | Other unintentional injuries                    | 0 (0 to 0) | 0 (0 to 0) | -25.8% (-31.2% to -20.1%) |
| Honduras | Pedestrian road injuries                        | 0 (0 to 0) | 0 (0 to 0) | -28% (-36.2% to -20.3%)   |
| Honduras | Physical violence by firearm                    | 0 (0 to 0) | 0 (0 to 1) | 134.3% (104.3% to 175.8%) |
| Honduras | Physical violence by other means                | 0 (0 to 1) | 0 (0 to 1) | 34.2% (20.5% to 47.8%)    |
| Honduras | Physical violence by sharp object               | 0 (0 to 1) | 1 (0 to 1) | 48.4% (31.5% to 66.4%)    |
| Honduras | Poisoning by carbon monoxide                    | 0 (0 to 0) | 0 (0 to 0) | 48.5% (28.5% to 69.2%)    |
| Honduras | Poisoning by other means                        | 0 (0 to 0) | 0 (0 to 0) | -14.5% (-23.6% to -4.4%)  |
| Honduras | Pulmonary aspiration and foreign body in airway | 0 (0 to 0) | 0 (0 to 0) | -8.9% (-20% to 3.5%)      |
| Honduras | Self-harm by firearm                            | 0 (0 to 0) | 0 (0 to 0) | -11.1% (-23.9% to 2.4%)   |
| Honduras | Self-harm by other specified means              | 0 (0 to 0) | 0 (0 to 0) | -11.7% (-20.6% to -2.4%)  |

|          |                                                 |              |             |                           |
|----------|-------------------------------------------------|--------------|-------------|---------------------------|
| Honduras | Unintentional firearm injuries                  | 0 (0 to 0)   | 0 (0 to 0)  | -28.4% (-36.4% to -21.7%) |
| Honduras | Venomous animal contact                         | 0 (0 to 0)   | 0 (0 to 0)  | -12.1% (-16.9% to -7.8%)  |
| Hungary  | Adverse effects of medical treatment            | 0 (0 to 0)   | 0 (0 to 0)  | 0% (0% to 0%)             |
| Hungary  | Conflict and terrorism                          | 0 (0 to 0)   | 0 (0 to 0)  | NA                        |
| Hungary  | Cyclist road injuries                           | 1 (0 to 2)   | 1 (0 to 1)  | -37.5% (-45% to -29.5%)   |
| Hungary  | Drowning                                        | 0 (0 to 0)   | 0 (0 to 0)  | 73.7% (49.8% to 97.7%)    |
| Hungary  | Environmental heat and cold exposure            | 0 (0 to 0)   | 0 (0 to 0)  | -16% (-20.4% to -11.4%)   |
| Hungary  | Executions and police conflict                  | 0 (0 to 0)   | 0 (0 to 0)  | NA                        |
| Hungary  | Exposure to forces of nature                    | 0 (0 to 0)   | 0 (0 to 0)  | NA                        |
| Hungary  | Falls                                           | 11 (8 to 15) | 8 (6 to 10) | -30.6% (-35.2% to -24.7%) |
| Hungary  | Fire, heat, and hot substances                  | 0 (0 to 0)   | 0 (0 to 0)  | -23.8% (-29.9% to -17.4%) |
| Hungary  | Foreign body in eyes                            | 0 (0 to 0)   | 0 (0 to 0)  | 0% (0% to 0%)             |
| Hungary  | Foreign body in other body part                 | 0 (0 to 0)   | 0 (0 to 0)  | -0.2% (-3.7% to 3.7%)     |
| Hungary  | Motor vehicle road injuries                     | 2 (1 to 3)   | 1 (1 to 2)  | -35.9% (-43% to -27.5%)   |
| Hungary  | Motorcyclist road injuries                      | 0 (0 to 0)   | 0 (0 to 0)  | -30% (-43.3% to -14.4%)   |
| Hungary  | Non-venomous animal contact                     | 0 (0 to 0)   | 0 (0 to 0)  | -15.2% (-18.2% to -11.7%) |
| Hungary  | Other exposure to mechanical forces             | 2 (1 to 3)   | 1 (1 to 3)  | -4.9% (-11.4% to 0.3%)    |
| Hungary  | Other road injuries                             | 0 (0 to 0)   | 0 (0 to 0)  | -10.1% (-20.8% to 1%)     |
| Hungary  | Other transport injuries                        | 0 (0 to 0)   | 0 (0 to 0)  | -19.4% (-26% to -13.5%)   |
| Hungary  | Other unintentional injuries                    | 0 (0 to 1)   | 0 (0 to 0)  | -10.3% (-16.9% to -3.8%)  |
| Hungary  | Pedestrian road injuries                        | 0 (0 to 1)   | 0 (0 to 0)  | -37.9% (-47.4% to -27.5%) |
| Hungary  | Physical violence by firearm                    | 0 (0 to 0)   | 0 (0 to 0)  | 68.2% (48.8% to 92.4%)    |
| Hungary  | Physical violence by other means                | 0 (0 to 1)   | 0 (0 to 1)  | -22.6% (-31.8% to -13.7%) |
| Hungary  | Physical violence by sharp object               | 0 (0 to 0)   | 0 (0 to 0)  | -43.6% (-53.2% to -33.5%) |
| Hungary  | Poisoning by carbon monoxide                    | 0 (0 to 0)   | 0 (0 to 0)  | 33.3% (22% to 46.7%)      |
| Hungary  | Poisoning by other means                        | 0 (0 to 0)   | 0 (0 to 0)  | -3.1% (-10.4% to 4.4%)    |
| Hungary  | Pulmonary aspiration and foreign body in airway | 0 (0 to 0)   | 0 (0 to 0)  | -18.4% (-24.3% to -11.8%) |
| Hungary  | Self-harm by firearm                            | 0 (0 to 0)   | 0 (0 to 0)  | -10.6% (-23.9% to 10.5%)  |
| Hungary  | Self-harm by other specified means              | 1 (0 to 1)   | 0 (0 to 1)  | -44.3% (-47.6% to -40.8%) |
| Hungary  | Unintentional firearm injuries                  | 0 (0 to 0)   | 0 (0 to 0)  | 0.2% (-9% to 9.9%)        |
| Hungary  | Venomous animal contact                         | 0 (0 to 0)   | 0 (0 to 0)  | -14.4% (-18.9% to -8.9%)  |
| Iceland  | Adverse effects of medical treatment            | 0 (0 to 0)   | 0 (0 to 0)  | 0% (0% to 0%)             |
| Iceland  | Conflict and terrorism                          | 0 (0 to 0)   | 0 (0 to 0)  | NA                        |
| Iceland  | Cyclist road injuries                           | 0 (0 to 0)   | 0 (0 to 0)  | -23.6% (-32.7% to -13.1%) |
| Iceland  | Drowning                                        | 0 (0 to 0)   | 0 (0 to 0)  | 24.9% (14.5% to 36.1%)    |
| Iceland  | Environmental heat and cold exposure            | 0 (0 to 0)   | 0 (0 to 0)  | -6.7% (-11.4% to -2.3%)   |
| Iceland  | Executions and police conflict                  | 0 (0 to 0)   | 0 (0 to 0)  | NA                        |
| Iceland  | Exposure to forces of nature                    | 0 (0 to 0)   | 0 (0 to 0)  | NA                        |
| Iceland  | Falls                                           | 5 (4 to 7)   | 6 (4 to 8)  | 10.8% (7% to 15.2%)       |
| Iceland  | Fire, heat, and hot substances                  | 0 (0 to 0)   | 0 (0 to 0)  | -11.7% (-16.2% to -7.1%)  |
| Iceland  | Foreign body in eyes                            | 0 (0 to 0)   | 0 (0 to 0)  | 0% (0% to 0%)             |
| Iceland  | Foreign body in other body part                 | 0 (0 to 0)   | 0 (0 to 0)  | 2.5% (-1% to 6.2%)        |
| Iceland  | Motor vehicle road injuries                     | 1 (0 to 1)   | 0 (0 to 1)  | -53.1% (-59.1% to -47.3%) |

|         |                                                 |            |            |                           |
|---------|-------------------------------------------------|------------|------------|---------------------------|
| Iceland | Motorcyclist road injuries                      | 0 (0 to 0) | 0 (0 to 0) | -6.3% (-20.7% to 8.3%)    |
| Iceland | Non-venomous animal contact                     | 0 (0 to 0) | 0 (0 to 0) | -9.7% (-13% to -6.1%)     |
| Iceland | Other exposure to mechanical forces             | 1 (0 to 1) | 0 (0 to 1) | -13.8% (-20.9% to -8%)    |
| Iceland | Other road injuries                             | 0 (0 to 0) | 0 (0 to 0) | -16.4% (-26.5% to -3.5%)  |
| Iceland | Other transport injuries                        | 0 (0 to 1) | 0 (0 to 0) | -21.4% (-26.7% to -15.7%) |
| Iceland | Other unintentional injuries                    | 0 (0 to 0) | 0 (0 to 0) | -10.7% (-15.7% to -6%)    |
| Iceland | Pedestrian road injuries                        | 0 (0 to 0) | 0 (0 to 0) | -31.5% (-42.4% to -19.1%) |
| Iceland | Physical violence by firearm                    | 0 (0 to 0) | 0 (0 to 0) | 22% (11.3% to 36.5%)      |
| Iceland | Physical violence by other means                | 0 (0 to 0) | 0 (0 to 0) | -13.3% (-20.2% to -6.8%)  |
| Iceland | Physical violence by sharp object               | 0 (0 to 0) | 0 (0 to 0) | -13.1% (-21.8% to -4.4%)  |
| Iceland | Poisoning by carbon monoxide                    | 0 (0 to 0) | 0 (0 to 0) | 0.7% (-5.8% to 8.1%)      |
| Iceland | Poisoning by other means                        | 0 (0 to 0) | 0 (0 to 0) | -10% (-15.1% to -5%)      |
| Iceland | Pulmonary aspiration and foreign body in airway | 0 (0 to 0) | 0 (0 to 0) | -10.2% (-18.1% to -1%)    |
| Iceland | Self-harm by firearm                            | 0 (0 to 0) | 0 (0 to 0) | -31.7% (-41.3% to -21.2%) |
| Iceland | Self-harm by other specified means              | 0 (0 to 1) | 0 (0 to 0) | -31.2% (-34.9% to -27%)   |
| Iceland | Unintentional firearm injuries                  | 0 (0 to 0) | 0 (0 to 0) | 5% (-3.1% to 14.8%)       |
| Iceland | Venomous animal contact                         | 0 (0 to 0) | 0 (0 to 0) | -9.8% (-15% to -3.8%)     |
| India   | Adverse effects of medical treatment            | 0 (0 to 0) | 0 (0 to 0) | 0% (0% to 0%)             |
| India   | Conflict and terrorism                          | 1 (0 to 2) | 0 (0 to 0) | NA                        |
| India   | Cyclist road injuries                           | 1 (0 to 1) | 1 (0 to 2) | 13.7% (9% to 18.1%)       |
| India   | Drowning                                        | 0 (0 to 0) | 0 (0 to 0) | -29.2% (-33.2% to -25%)   |
| India   | Environmental heat and cold exposure            | 0 (0 to 0) | 0 (0 to 0) | -7.2% (-10.6% to -4.1%)   |
| India   | Executions and police conflict                  | 0 (0 to 0) | 0 (0 to 0) | NA                        |
| India   | Exposure to forces of nature                    | 0 (0 to 0) | 0 (0 to 0) | NA                        |
| India   | Falls                                           | 4 (3 to 6) | 5 (3 to 6) | 15.2% (11.9% to 18.2%)    |
| India   | Fire, heat, and hot substances                  | 0 (0 to 0) | 0 (0 to 0) | -8.5% (-11.4% to -5.9%)   |
| India   | Foreign body in eyes                            | 0 (0 to 0) | 0 (0 to 0) | 0% (0% to 0%)             |
| India   | Foreign body in other body part                 | 0 (0 to 0) | 0 (0 to 0) | -3.3% (-4.4% to -2.1%)    |
| India   | Motor vehicle road injuries                     | 1 (0 to 1) | 1 (0 to 2) | 25.8% (20.9% to 30.4%)    |
| India   | Motorcyclist road injuries                      | 1 (0 to 1) | 1 (1 to 2) | 56.8% (50.7% to 63.6%)    |
| India   | Non-venomous animal contact                     | 0 (0 to 1) | 0 (0 to 1) | -31.7% (-34.1% to -27.8%) |
| India   | Other exposure to mechanical forces             | 0 (0 to 0) | 0 (0 to 0) | -4.4% (-8.1% to -0.3%)    |
| India   | Other road injuries                             | 0 (0 to 0) | 0 (0 to 0) | 10.9% (6.8% to 15.2%)     |
| India   | Other transport injuries                        | 0 (0 to 0) | 0 (0 to 0) | 1.9% (0.1% to 3.8%)       |
| India   | Other unintentional injuries                    | 0 (0 to 0) | 0 (0 to 0) | -19.5% (-21.8% to -17.2%) |
| India   | Pedestrian road injuries                        | 1 (0 to 1) | 1 (0 to 1) | 13% (7.8% to 18.1%)       |
| India   | Physical violence by firearm                    | 0 (0 to 0) | 0 (0 to 0) | -6.8% (-13.4% to 1.1%)    |
| India   | Physical violence by other means                | 0 (0 to 1) | 0 (0 to 1) | -11.3% (-13.1% to -9.6%)  |
| India   | Physical violence by sharp object               | 0 (0 to 0) | 0 (0 to 0) | -15.5% (-19.4% to -11.5%) |
| India   | Poisoning by carbon monoxide                    | 0 (0 to 0) | 0 (0 to 0) | 8.1% (-1.4% to 16.7%)     |
| India   | Poisoning by other means                        | 0 (0 to 0) | 0 (0 to 0) | 1.8% (-6.4% to 9%)        |
| India   | Pulmonary aspiration and foreign body in airway | 0 (0 to 0) | 0 (0 to 0) | -18.6% (-21.9% to -15.2%) |
| India   | Self-harm by firearm                            | 0 (0 to 0) | 0 (0 to 0) | -1.3% (-9.5% to 7.8%)     |



|                            |                                                 |               |            |                           |
|----------------------------|-------------------------------------------------|---------------|------------|---------------------------|
| India                      | Self-harm by other specified means              | 0 (0 to 1)    | 0 (0 to 1) | -29.2% (-33.9% to -24.8%) |
| India                      | Unintentional firearm injuries                  | 0 (0 to 0)    | 0 (0 to 0) | -4.3% (-9% to -0.1%)      |
| India                      | Venomous animal contact                         | 0 (0 to 0)    | 0 (0 to 0) | -51.2% (-54.7% to -47.8%) |
| Indonesia                  | Adverse effects of medical treatment            | 0 (0 to 0)    | 0 (0 to 0) | 0% (0% to 0%)             |
| Indonesia                  | Conflict and terrorism                          | 0 (0 to 0)    | 0 (0 to 0) | NA                        |
| Indonesia                  | Cyclist road injuries                           | 1 (0 to 1)    | 0 (0 to 1) | -8.1% (-13.7% to -1.7%)   |
| Indonesia                  | Drowning                                        | 0 (0 to 0)    | 0 (0 to 0) | -3% (-11.7% to 5.8%)      |
| Indonesia                  | Environmental heat and cold exposure            | 0 (0 to 0)    | 0 (0 to 0) | -10% (-14.6% to -5.4%)    |
| Indonesia                  | Executions and police conflict                  | 0 (0 to 0)    | 0 (0 to 0) | NA                        |
| Indonesia                  | Exposure to forces of nature                    | 0 (0 to 0)    | 0 (0 to 0) | NA                        |
| Indonesia                  | Falls                                           | 6 (4 to 8)    | 5 (3 to 8) | -6.6% (-9.1% to -4.3%)    |
| Indonesia                  | Fire, heat, and hot substances                  | 0 (0 to 0)    | 0 (0 to 0) | 2.8% (-1.2% to 6.6%)      |
| Indonesia                  | Foreign body in eyes                            | 0 (0 to 0)    | 0 (0 to 0) | 0% (0% to 0%)             |
| Indonesia                  | Foreign body in other body part                 | 0 (0 to 1)    | 0 (0 to 1) | -9.6% (-11.1% to -8.1%)   |
| Indonesia                  | Motor vehicle road injuries                     | 1 (0 to 2)    | 1 (0 to 1) | -30.6% (-35.1% to -26.3%) |
| Indonesia                  | Motorcyclist road injuries                      | 2 (1 to 3)    | 2 (1 to 3) | 3.4% (-2% to 10.6%)       |
| Indonesia                  | Non-venomous animal contact                     | 0 (0 to 0)    | 0 (0 to 0) | -32.9% (-37.3% to -29.5%) |
| Indonesia                  | Other exposure to mechanical forces             | 0 (0 to 1)    | 0 (0 to 0) | -14% (-19.9% to -8.5%)    |
| Indonesia                  | Other road injuries                             | 0 (0 to 0)    | 0 (0 to 0) | -18% (-27.5% to -8.7%)    |
| Indonesia                  | Other transport injuries                        | 0 (0 to 1)    | 0 (0 to 0) | -37.4% (-41.6% to -33.4%) |
| Indonesia                  | Other unintentional injuries                    | 1 (0 to 1)    | 1 (0 to 1) | -10.3% (-17.8% to -3.8%)  |
| Indonesia                  | Pedestrian road injuries                        | 1 (0 to 2)    | 1 (0 to 1) | -41.6% (-45.6% to -37.7%) |
| Indonesia                  | Physical violence by firearm                    | 0 (0 to 0)    | 0 (0 to 0) | 39.6% (28.1% to 51.2%)    |
| Indonesia                  | Physical violence by other means                | 0 (0 to 0)    | 0 (0 to 0) | 3.6% (-1.9% to 9.6%)      |
| Indonesia                  | Physical violence by sharp object               | 0 (0 to 0)    | 0 (0 to 0) | -5.7% (-12% to 0.4%)      |
| Indonesia                  | Poisoning by carbon monoxide                    | 0 (0 to 0)    | 0 (0 to 0) | 4.2% (0% to 8.9%)         |
| Indonesia                  | Poisoning by other means                        | 0 (0 to 0)    | 0 (0 to 0) | -13.5% (-15.7% to -10.8%) |
| Indonesia                  | Pulmonary aspiration and foreign body in airway | 0 (0 to 0)    | 0 (0 to 0) | -32.3% (-38.1% to -25.9%) |
| Indonesia                  | Self-harm by firearm                            | 0 (0 to 0)    | 0 (0 to 0) | -22.9% (-31% to -12.6%)   |
| Indonesia                  | Self-harm by other specified means              | 0 (0 to 0)    | 0 (0 to 0) | -17.7% (-20.8% to -14.1%) |
| Indonesia                  | Unintentional firearm injuries                  | 0 (0 to 0)    | 0 (0 to 0) | -12.2% (-18.7% to -6%)    |
| Indonesia                  | Venomous animal contact                         | 0 (0 to 0)    | 0 (0 to 0) | 15.7% (5.1% to 30.1%)     |
| Iran (Islamic Republic of) | Adverse effects of medical treatment            | 0 (0 to 0)    | 0 (0 to 0) | 0% (0% to 0%)             |
| Iran (Islamic Republic of) | Conflict and terrorism                          | 1 (0 to 3)    | 0 (0 to 0) | NA                        |
| Iran (Islamic Republic of) | Cyclist road injuries                           | 0 (0 to 0)    | 0 (0 to 0) | -10.7% (-15.4% to -6.4%)  |
| Iran (Islamic Republic of) | Drowning                                        | 0 (0 to 0)    | 0 (0 to 0) | -54.7% (-59.5% to -49.6%) |
| Iran (Islamic Republic of) | Environmental heat and cold exposure            | 0 (0 to 0)    | 0 (0 to 0) | 7.3% (5.7% to 9.1%)       |
| Iran (Islamic Republic of) | Executions and police conflict                  | 0 (0 to 1)    | 0 (0 to 0) | NA                        |
| Iran (Islamic Republic of) | Exposure to forces of nature                    | 44 (20 to 89) | 0 (0 to 0) | NA                        |
| Iran (Islamic Republic of) | Falls                                           | 2 (2 to 3)    | 2 (1 to 3) | -0.1% (-3.6% to 3.4%)     |
| Iran (Islamic Republic of) | Fire, heat, and hot substances                  | 0 (0 to 0)    | 0 (0 to 0) | -30.3% (-33.9% to -26.7%) |
| Iran (Islamic Republic of) | Foreign body in eyes                            | 0 (0 to 0)    | 0 (0 to 0) | 0% (0% to 0%)             |
| Iran (Islamic Republic of) | Foreign body in other body part                 | 0 (0 to 0)    | 0 (0 to 0) | 0.4% (-0.4% to 1.3%)      |

|                            |                                                 |             |            |                           |
|----------------------------|-------------------------------------------------|-------------|------------|---------------------------|
| Iran (Islamic Republic of) | Motor vehicle road injuries                     | 1 (0 to 1)  | 1 (0 to 1) | -33.3% (-35.9% to -30.9%) |
| Iran (Islamic Republic of) | Motorcyclist road injuries                      | 0 (0 to 1)  | 0 (0 to 0) | -36.8% (-40.1% to -33.4%) |
| Iran (Islamic Republic of) | Non-venomous animal contact                     | 0 (0 to 0)  | 0 (0 to 0) | -8.8% (-11.2% to -6.4%)   |
| Iran (Islamic Republic of) | Other exposure to mechanical forces             | 0 (0 to 1)  | 0 (0 to 1) | -13.5% (-15.5% to -11.8%) |
| Iran (Islamic Republic of) | Other road injuries                             | 0 (0 to 0)  | 0 (0 to 0) | 7.3% (2% to 12.5%)        |
| Iran (Islamic Republic of) | Other transport injuries                        | 0 (0 to 0)  | 0 (0 to 0) | 3.4% (1.6% to 5.1%)       |
| Iran (Islamic Republic of) | Other unintentional injuries                    | 0 (0 to 0)  | 0 (0 to 0) | -14.6% (-17.5% to -11.6%) |
| Iran (Islamic Republic of) | Pedestrian road injuries                        | 0 (0 to 1)  | 0 (0 to 0) | -28.2% (-32% to -24.8%)   |
| Iran (Islamic Republic of) | Physical violence by firearm                    | 0 (0 to 0)  | 0 (0 to 0) | 45.5% (36.1% to 57.1%)    |
| Iran (Islamic Republic of) | Physical violence by other means                | 0 (0 to 0)  | 0 (0 to 0) | -2% (-7.1% to 1.8%)       |
| Iran (Islamic Republic of) | Physical violence by sharp object               | 0 (0 to 0)  | 0 (0 to 0) | 17.4% (11% to 23.9%)      |
| Iran (Islamic Republic of) | Poisoning by carbon monoxide                    | 0 (0 to 0)  | 0 (0 to 0) | -37.4% (-45.7% to -28.7%) |
| Iran (Islamic Republic of) | Poisoning by other means                        | 0 (0 to 0)  | 0 (0 to 0) | -35.9% (-41.7% to -30.3%) |
| Iran (Islamic Republic of) | Pulmonary aspiration and foreign body in airway | 0 (0 to 0)  | 0 (0 to 0) | -23% (-28.7% to -17.5%)   |
| Iran (Islamic Republic of) | Self-harm by firearm                            | 0 (0 to 0)  | 0 (0 to 0) | 7% (2.1% to 13.2%)        |
| Iran (Islamic Republic of) | Self-harm by other specified means              | 0 (0 to 0)  | 0 (0 to 0) | -24.3% (-28.1% to -19.6%) |
| Iran (Islamic Republic of) | Unintentional firearm injuries                  | 0 (0 to 0)  | 0 (0 to 0) | -12.6% (-15.1% to -10.1%) |
| Iran (Islamic Republic of) | Venomous animal contact                         | 0 (0 to 0)  | 0 (0 to 0) | -17.8% (-22.6% to -14.6%) |
| Iraq                       | Adverse effects of medical treatment            | 0 (0 to 0)  | 0 (0 to 0) | 0% (0% to 0%)             |
| Iraq                       | Conflict and terrorism                          | 5 (1 to 14) | 2 (0 to 6) | NA                        |
| Iraq                       | Cyclist road injuries                           | 0 (0 to 0)  | 0 (0 to 0) | -5.8% (-13.4% to 2.6%)    |
| Iraq                       | Drowning                                        | 0 (0 to 0)  | 0 (0 to 0) | 42.8% (23.5% to 62.9%)    |
| Iraq                       | Environmental heat and cold exposure            | 0 (0 to 0)  | 0 (0 to 0) | 2.2% (-3.4% to 8.1%)      |
| Iraq                       | Executions and police conflict                  | 0 (0 to 0)  | 0 (0 to 0) | NA                        |
| Iraq                       | Exposure to forces of nature                    | 0 (0 to 0)  | 0 (0 to 0) | NA                        |
| Iraq                       | Falls                                           | 2 (1 to 2)  | 2 (1 to 2) | 7.2% (1.9% to 12.3%)      |
| Iraq                       | Fire, heat, and hot substances                  | 0 (0 to 0)  | 0 (0 to 0) | -25.6% (-30.8% to -20%)   |
| Iraq                       | Foreign body in eyes                            | 0 (0 to 0)  | 0 (0 to 0) | 0% (0% to 0%)             |
| Iraq                       | Foreign body in other body part                 | 0 (0 to 0)  | 0 (0 to 0) | 4.1% (0.5% to 7.7%)       |
| Iraq                       | Motor vehicle road injuries                     | 1 (0 to 1)  | 0 (0 to 1) | -17.1% (-22.8% to -10.7%) |
| Iraq                       | Motorcyclist road injuries                      | 0 (0 to 0)  | 0 (0 to 0) | -15.6% (-23.7% to -6.2%)  |
| Iraq                       | Non-venomous animal contact                     | 0 (0 to 0)  | 0 (0 to 0) | -12.1% (-19.3% to -6.1%)  |
| Iraq                       | Other exposure to mechanical forces             | 1 (0 to 1)  | 1 (0 to 1) | -20.9% (-27.3% to -13.9%) |
| Iraq                       | Other road injuries                             | 0 (0 to 0)  | 0 (0 to 0) | -3.8% (-13.2% to 6.3%)    |
| Iraq                       | Other transport injuries                        | 0 (0 to 0)  | 0 (0 to 0) | 4.3% (0.1% to 9%)         |
| Iraq                       | Other unintentional injuries                    | 0 (0 to 1)  | 0 (0 to 0) | -28.2% (-32.8% to -23%)   |
| Iraq                       | Pedestrian road injuries                        | 0 (0 to 0)  | 0 (0 to 0) | -33% (-39.1% to -26.5%)   |
| Iraq                       | Physical violence by firearm                    | 0 (0 to 0)  | 0 (0 to 0) | 170.6% (132.9% to 220.3%) |
| Iraq                       | Physical violence by other means                | 0 (0 to 1)  | 0 (0 to 1) | 17.9% (3.8% to 31.6%)     |
| Iraq                       | Physical violence by sharp object               | 0 (0 to 0)  | 0 (0 to 0) | 3.5% (-11.2% to 20.4%)    |
| Iraq                       | Poisoning by carbon monoxide                    | 0 (0 to 0)  | 0 (0 to 0) | 49.5% (34.4% to 66.8%)    |
| Iraq                       | Poisoning by other means                        | 0 (0 to 0)  | 0 (0 to 0) | -4.7% (-11.9% to 3.5%)    |
| Iraq                       | Pulmonary aspiration and foreign body in airway | 0 (0 to 0)  | 0 (0 to 0) | -20.5% (-28.7% to -12.3%) |

|         |                                                 |            |            |                           |
|---------|-------------------------------------------------|------------|------------|---------------------------|
| Iraq    | Self-harm by firearm                            | 0 (0 to 0) | 0 (0 to 0) | 9.8% (-1.6% to 23.6%)     |
| Iraq    | Self-harm by other specified means              | 0 (0 to 0) | 0 (0 to 0) | 15.7% (9.4% to 23.4%)     |
| Iraq    | Unintentional firearm injuries                  | 0 (0 to 1) | 0 (0 to 0) | -7.9% (-16.7% to 2.5%)    |
| Iraq    | Venomous animal contact                         | 0 (0 to 0) | 0 (0 to 0) | 14.4% (5.6% to 25.6%)     |
| Ireland | Adverse effects of medical treatment            | 0 (0 to 0) | 0 (0 to 0) | 0% (0% to 0%)             |
| Ireland | Conflict and terrorism                          | 0 (0 to 0) | 0 (0 to 0) | NA                        |
| Ireland | Cyclist road injuries                           | 0 (0 to 0) | 0 (0 to 0) | -39.3% (-49.1% to -28.4%) |
| Ireland | Drowning                                        | 0 (0 to 0) | 0 (0 to 0) | 57.1% (42.7% to 71.7%)    |
| Ireland | Environmental heat and cold exposure            | 0 (0 to 0) | 0 (0 to 0) | -11% (-16.8% to -5%)      |
| Ireland | Executions and police conflict                  | 0 (0 to 0) | 0 (0 to 0) | NA                        |
| Ireland | Exposure to forces of nature                    | 0 (0 to 0) | 0 (0 to 0) | NA                        |
| Ireland | Falls                                           | 5 (4 to 7) | 6 (4 to 8) | 12.7% (7.7% to 17.4%)     |
| Ireland | Fire, heat, and hot substances                  | 0 (0 to 0) | 0 (0 to 0) | -26.8% (-33.1% to -20.3%) |
| Ireland | Foreign body in eyes                            | 0 (0 to 0) | 0 (0 to 0) | 0% (0% to 0%)             |
| Ireland | Foreign body in other body part                 | 0 (0 to 0) | 0 (0 to 0) | 1.9% (-1.5% to 5.3%)      |
| Ireland | Motor vehicle road injuries                     | 1 (0 to 1) | 0 (0 to 0) | -49.2% (-57.5% to -40.5%) |
| Ireland | Motorcyclist road injuries                      | 0 (0 to 0) | 0 (0 to 0) | -37.6% (-51.6% to -21.6%) |
| Ireland | Non-venomous animal contact                     | 0 (0 to 0) | 0 (0 to 0) | -26.5% (-30.2% to -23.2%) |
| Ireland | Other exposure to mechanical forces             | 1 (0 to 1) | 0 (0 to 1) | -20.7% (-28.9% to -13.9%) |
| Ireland | Other road injuries                             | 0 (0 to 0) | 0 (0 to 0) | -11.8% (-25.5% to 4.1%)   |
| Ireland | Other transport injuries                        | 0 (0 to 0) | 0 (0 to 0) | -4.4% (-10% to 2.1%)      |
| Ireland | Other unintentional injuries                    | 0 (0 to 0) | 0 (0 to 0) | -8.2% (-14.7% to -2.8%)   |
| Ireland | Pedestrian road injuries                        | 0 (0 to 0) | 0 (0 to 0) | -44.3% (-55.7% to -31.4%) |
| Ireland | Physical violence by firearm                    | 0 (0 to 0) | 0 (0 to 0) | 40.1% (27.5% to 56.8%)    |
| Ireland | Physical violence by other means                | 0 (0 to 0) | 0 (0 to 0) | -3.7% (-12.1% to 4.5%)    |
| Ireland | Physical violence by sharp object               | 0 (0 to 0) | 0 (0 to 0) | -14.2% (-24% to -5.3%)    |
| Ireland | Poisoning by carbon monoxide                    | 0 (0 to 0) | 0 (0 to 0) | 18.9% (8.7% to 28.7%)     |
| Ireland | Poisoning by other means                        | 0 (0 to 0) | 0 (0 to 0) | -4.8% (-10.4% to 1%)      |
| Ireland | Pulmonary aspiration and foreign body in airway | 0 (0 to 0) | 0 (0 to 0) | -14.1% (-22.3% to -5%)    |
| Ireland | Self-harm by firearm                            | 0 (0 to 0) | 0 (0 to 0) | -0.8% (-18.4% to 16.2%)   |
| Ireland | Self-harm by other specified means              | 0 (0 to 1) | 0 (0 to 0) | -9.5% (-14.6% to -3.8%)   |
| Ireland | Unintentional firearm injuries                  | 0 (0 to 0) | 0 (0 to 0) | -0.1% (-11.9% to 10.1%)   |
| Ireland | Venomous animal contact                         | 0 (0 to 0) | 0 (0 to 0) | -21.8% (-26.8% to -16.6%) |
| Israel  | Adverse effects of medical treatment            | 0 (0 to 0) | 0 (0 to 0) | 0% (0% to 0%)             |
| Israel  | Conflict and terrorism                          | 1 (0 to 3) | 0 (0 to 0) | NA                        |
| Israel  | Cyclist road injuries                           | 0 (0 to 0) | 0 (0 to 0) | -9.7% (-19.5% to 1%)      |
| Israel  | Drowning                                        | 0 (0 to 0) | 0 (0 to 0) | 52.6% (36% to 71.1%)      |
| Israel  | Environmental heat and cold exposure            | 0 (0 to 0) | 0 (0 to 0) | -5.4% (-10.5% to -0.5%)   |
| Israel  | Executions and police conflict                  | 0 (0 to 0) | 0 (0 to 0) | NA                        |
| Israel  | Exposure to forces of nature                    | 0 (0 to 0) | 0 (0 to 0) | NA                        |
| Israel  | Falls                                           | 4 (3 to 5) | 4 (3 to 6) | 18% (13.3% to 22.6%)      |
| Israel  | Fire, heat, and hot substances                  | 0 (0 to 0) | 0 (0 to 0) | -11% (-16.1% to -6.8%)    |
| Israel  | Foreign body in eyes                            | 0 (0 to 0) | 0 (0 to 0) | 0% (0% to 0%)             |

|        |                                                 |            |            |                           |
|--------|-------------------------------------------------|------------|------------|---------------------------|
| Israel | Foreign body in other body part                 | 0 (0 to 0) | 0 (0 to 0) | -6% (-9.3% to -2.4%)      |
| Israel | Motor vehicle road injuries                     | 1 (0 to 1) | 0 (0 to 1) | -39.4% (-46.5% to -32.2%) |
| Israel | Motorcyclist road injuries                      | 0 (0 to 0) | 0 (0 to 0) | 24.9% (7.5% to 46.8%)     |
| Israel | Non-venomous animal contact                     | 0 (0 to 0) | 0 (0 to 0) | -13% (-16.4% to -9.3%)    |
| Israel | Other exposure to mechanical forces             | 1 (0 to 1) | 0 (0 to 1) | -12.1% (-19.7% to -4.7%)  |
| Israel | Other road injuries                             | 0 (0 to 0) | 0 (0 to 0) | -13.6% (-24.2% to -2.2%)  |
| Israel | Other transport injuries                        | 0 (0 to 0) | 0 (0 to 0) | -1.2% (-4.5% to 1.9%)     |
| Israel | Other unintentional injuries                    | 0 (0 to 0) | 0 (0 to 0) | -20.1% (-24.9% to -14.8%) |
| Israel | Pedestrian road injuries                        | 0 (0 to 0) | 0 (0 to 0) | -35.1% (-43.3% to -26.7%) |
| Israel | Physical violence by firearm                    | 0 (0 to 0) | 0 (0 to 0) | 72.7% (51.1% to 102.2%)   |
| Israel | Physical violence by other means                | 0 (0 to 0) | 0 (0 to 0) | -18.3% (-28.6% to -9%)    |
| Israel | Physical violence by sharp object               | 0 (0 to 0) | 0 (0 to 0) | 0.2% (-14.1% to 15.4%)    |
| Israel | Poisoning by carbon monoxide                    | 0 (0 to 0) | 0 (0 to 0) | 7.9% (-1.9% to 17.6%)     |
| Israel | Poisoning by other means                        | 0 (0 to 0) | 0 (0 to 0) | -8.4% (-14.9% to -2.2%)   |
| Israel | Pulmonary aspiration and foreign body in airway | 0 (0 to 0) | 0 (0 to 0) | -25.3% (-31.6% to -18%)   |
| Israel | Self-harm by firearm                            | 0 (0 to 0) | 0 (0 to 0) | -26.1% (-37.9% to -15.8%) |
| Israel | Self-harm by other specified means              | 0 (0 to 0) | 0 (0 to 0) | -21.4% (-26.1% to -16.4%) |
| Israel | Unintentional firearm injuries                  | 0 (0 to 0) | 0 (0 to 0) | -33.5% (-43.7% to -25.2%) |
| Israel | Venomous animal contact                         | 0 (0 to 0) | 0 (0 to 0) | -15.4% (-20.9% to -9.8%)  |
| Italy  | Adverse effects of medical treatment            | 0 (0 to 0) | 0 (0 to 0) | 0% (0% to 0%)             |
| Italy  | Conflict and terrorism                          | 0 (0 to 0) | 0 (0 to 0) | NA                        |
| Italy  | Cyclist road injuries                           | 0 (0 to 0) | 0 (0 to 0) | -30.3% (-35.6% to -23.7%) |
| Italy  | Drowning                                        | 0 (0 to 0) | 0 (0 to 0) | 4.1% (0.2% to 7%)         |
| Italy  | Environmental heat and cold exposure            | 0 (0 to 0) | 0 (0 to 0) | -37.2% (-42.3% to -31.1%) |
| Italy  | Executions and police conflict                  | 0 (0 to 0) | 0 (0 to 0) | NA                        |
| Italy  | Exposure to forces of nature                    | 0 (0 to 0) | 0 (0 to 0) | NA                        |
| Italy  | Falls                                           | 7 (5 to 9) | 5 (4 to 7) | -20% (-24.4% to -15.9%)   |
| Italy  | Fire, heat, and hot substances                  | 0 (0 to 0) | 0 (0 to 0) | -38.9% (-44.4% to -31.7%) |
| Italy  | Foreign body in eyes                            | 0 (0 to 0) | 0 (0 to 0) | 0% (0% to 0%)             |
| Italy  | Foreign body in other body part                 | 0 (0 to 1) | 0 (0 to 0) | -23% (-30.2% to -13.8%)   |
| Italy  | Motor vehicle road injuries                     | 1 (0 to 1) | 0 (0 to 1) | -28.3% (-32.5% to -23.5%) |
| Italy  | Motorcyclist road injuries                      | 0 (0 to 0) | 0 (0 to 0) | 0.9% (-7.8% to 11.2%)     |
| Italy  | Non-venomous animal contact                     | 0 (0 to 0) | 0 (0 to 0) | -68.1% (-72.3% to -61.9%) |
| Italy  | Other exposure to mechanical forces             | 1 (0 to 1) | 0 (0 to 1) | -34.7% (-38.5% to -30.1%) |
| Italy  | Other road injuries                             | 0 (0 to 0) | 0 (0 to 0) | 7.5% (-0.7% to 17.4%)     |
| Italy  | Other transport injuries                        | 0 (0 to 0) | 0 (0 to 0) | 7.9% (5.2% to 11.4%)      |
| Italy  | Other unintentional injuries                    | 0 (0 to 0) | 0 (0 to 0) | -43.7% (-47.1% to -39.7%) |
| Italy  | Pedestrian road injuries                        | 0 (0 to 0) | 0 (0 to 0) | -29.3% (-34.4% to -23%)   |
| Italy  | Physical violence by firearm                    | 0 (0 to 0) | 0 (0 to 0) | -40.6% (-45.7% to -35.3%) |
| Italy  | Physical violence by other means                | 0 (0 to 0) | 0 (0 to 0) | -46.1% (-50.2% to -40.7%) |
| Italy  | Physical violence by sharp object               | 0 (0 to 0) | 0 (0 to 0) | -46.5% (-51.9% to -39.8%) |
| Italy  | Poisoning by carbon monoxide                    | 0 (0 to 0) | 0 (0 to 0) | -26.5% (-39% to -6.7%)    |
| Italy  | Poisoning by other means                        | 0 (0 to 0) | 0 (0 to 0) | -46.9% (-51.3% to -41.5%) |

|         |                                                 |             |             |                           |
|---------|-------------------------------------------------|-------------|-------------|---------------------------|
| Italy   | Pulmonary aspiration and foreign body in airway | 0 (0 to 0)  | 0 (0 to 0)  | -9.7% (-16.1% to -3.5%)   |
| Italy   | Self-harm by firearm                            | 0 (0 to 0)  | 0 (0 to 0)  | -1.2% (-11.9% to 14.5%)   |
| Italy   | Self-harm by other specified means              | 0 (0 to 0)  | 0 (0 to 0)  | -39.9% (-44.2% to -35.9%) |
| Italy   | Unintentional firearm injuries                  | 0 (0 to 0)  | 0 (0 to 0)  | -47% (-51.9% to -40%)     |
| Italy   | Venomous animal contact                         | 0 (0 to 0)  | 0 (0 to 0)  | -72.2% (-76.9% to -65%)   |
| Jamaica | Adverse effects of medical treatment            | 0 (0 to 0)  | 0 (0 to 0)  | 0% (0% to 0%)             |
| Jamaica | Conflict and terrorism                          | 1 (0 to 2)  | 0 (0 to 0)  | NA                        |
| Jamaica | Cyclist road injuries                           | 0 (0 to 0)  | 0 (0 to 0)  | -6.6% (-15.1% to 1.8%)    |
| Jamaica | Drowning                                        | 0 (0 to 0)  | 0 (0 to 0)  | 56.1% (35% to 79.6%)      |
| Jamaica | Environmental heat and cold exposure            | 0 (0 to 0)  | 0 (0 to 1)  | 6.5% (2.6% to 10.5%)      |
| Jamaica | Executions and police conflict                  | 0 (0 to 0)  | 0 (0 to 0)  | NA                        |
| Jamaica | Exposure to forces of nature                    | 0 (0 to 0)  | 0 (0 to 0)  | NA                        |
| Jamaica | Falls                                           | 1 (1 to 1)  | 1 (1 to 2)  | 45.5% (39.9% to 51.9%)    |
| Jamaica | Fire, heat, and hot substances                  | 0 (0 to 0)  | 0 (0 to 0)  | -1.6% (-6.3% to 4.8%)     |
| Jamaica | Foreign body in eyes                            | 0 (0 to 0)  | 0 (0 to 0)  | 0% (0% to 0%)             |
| Jamaica | Foreign body in other body part                 | 0 (0 to 0)  | 0 (0 to 0)  | -33.8% (-40.2% to -27.9%) |
| Jamaica | Motor vehicle road injuries                     | 0 (0 to 0)  | 0 (0 to 0)  | 20.7% (9.7% to 33.3%)     |
| Jamaica | Motorcyclist road injuries                      | 0 (0 to 0)  | 0 (0 to 0)  | -2.3% (-12.3% to 8.2%)    |
| Jamaica | Non-venomous animal contact                     | 0 (0 to 0)  | 0 (0 to 0)  | -21.4% (-25% to -18%)     |
| Jamaica | Other exposure to mechanical forces             | 0 (0 to 1)  | 0 (0 to 1)  | 10.2% (0.8% to 20.7%)     |
| Jamaica | Other road injuries                             | 0 (0 to 0)  | 0 (0 to 0)  | -10.7% (-19.3% to -1.3%)  |
| Jamaica | Other transport injuries                        | 0 (0 to 0)  | 0 (0 to 0)  | -12.9% (-16.7% to -8.4%)  |
| Jamaica | Other unintentional injuries                    | 0 (0 to 0)  | 0 (0 to 0)  | -9% (-14.2% to -4.3%)     |
| Jamaica | Pedestrian road injuries                        | 0 (0 to 0)  | 0 (0 to 0)  | 5.2% (-4.1% to 14.2%)     |
| Jamaica | Physical violence by firearm                    | 0 (0 to 0)  | 0 (0 to 0)  | 24.6% (11% to 41.3%)      |
| Jamaica | Physical violence by other means                | 0 (0 to 0)  | 0 (0 to 0)  | 2.5% (-6.7% to 12.6%)     |
| Jamaica | Physical violence by sharp object               | 0 (0 to 0)  | 0 (0 to 0)  | -13.1% (-22.6% to -3.9%)  |
| Jamaica | Poisoning by carbon monoxide                    | 0 (0 to 0)  | 0 (0 to 0)  | 6.4% (-4.9% to 18%)       |
| Jamaica | Poisoning by other means                        | 0 (0 to 0)  | 0 (0 to 0)  | -1.9% (-8.3% to 4.8%)     |
| Jamaica | Pulmonary aspiration and foreign body in airway | 0 (0 to 0)  | 0 (0 to 0)  | 5.4% (-5.8% to 18.7%)     |
| Jamaica | Self-harm by firearm                            | 0 (0 to 0)  | 0 (0 to 0)  | 24.5% (11.7% to 44.1%)    |
| Jamaica | Self-harm by other specified means              | 0 (0 to 0)  | 0 (0 to 0)  | 8.1% (0.3% to 16.2%)      |
| Jamaica | Unintentional firearm injuries                  | 1 (0 to 1)  | 0 (0 to 1)  | -16.4% (-25.9% to -7.5%)  |
| Jamaica | Venomous animal contact                         | 0 (0 to 0)  | 0 (0 to 0)  | -18.8% (-22.5% to -14.4%) |
| Japan   | Adverse effects of medical treatment            | 0 (0 to 0)  | 0 (0 to 0)  | 0% (0% to 0%)             |
| Japan   | Conflict and terrorism                          | 0 (0 to 0)  | 0 (0 to 0)  | NA                        |
| Japan   | Cyclist road injuries                           | 1 (0 to 1)  | 0 (0 to 1)  | -39.3% (-43.1% to -35.5%) |
| Japan   | Drowning                                        | 0 (0 to 0)  | 0 (0 to 0)  | 35% (29.8% to 41.2%)      |
| Japan   | Environmental heat and cold exposure            | 0 (0 to 0)  | 0 (0 to 0)  | 13.4% (9.9% to 17.1%)     |
| Japan   | Executions and police conflict                  | 0 (0 to 0)  | 0 (0 to 0)  | NA                        |
| Japan   | Exposure to forces of nature                    | 0 (0 to 0)  | 0 (0 to 0)  | NA                        |
| Japan   | Falls                                           | 8 (5 to 11) | 8 (5 to 11) | 1.3% (-0.7% to 3.2%)      |
| Japan   | Fire, heat, and hot substances                  | 0 (0 to 0)  | 0 (0 to 0)  | -10.7% (-14.4% to -7.2%)  |

|        |                                                 |            |            |                           |
|--------|-------------------------------------------------|------------|------------|---------------------------|
| Japan  | Foreign body in eyes                            | 0 (0 to 0) | 0 (0 to 0) | 0% (0% to 0%)             |
| Japan  | Foreign body in other body part                 | 1 (0 to 1) | 1 (0 to 1) | -3% (-4.2% to -2%)        |
| Japan  | Motor vehicle road injuries                     | 1 (0 to 1) | 0 (0 to 1) | -46.9% (-50.3% to -44.1%) |
| Japan  | Motorcyclist road injuries                      | 0 (0 to 1) | 0 (0 to 0) | -46.1% (-50.4% to -42%)   |
| Japan  | Non-venomous animal contact                     | 0 (0 to 1) | 0 (0 to 0) | -14.9% (-16.4% to -13.3%) |
| Japan  | Other exposure to mechanical forces             | 1 (0 to 2) | 1 (0 to 2) | -12.4% (-16.3% to -9.5%)  |
| Japan  | Other road injuries                             | 0 (0 to 0) | 0 (0 to 0) | -21.9% (-26.1% to -17.2%) |
| Japan  | Other transport injuries                        | 0 (0 to 1) | 0 (0 to 1) | -10.4% (-13.3% to -7.6%)  |
| Japan  | Other unintentional injuries                    | 1 (1 to 2) | 1 (1 to 1) | -9.6% (-12% to -7.4%)     |
| Japan  | Pedestrian road injuries                        | 0 (0 to 1) | 0 (0 to 0) | -38.1% (-43.6% to -32.5%) |
| Japan  | Physical violence by firearm                    | 0 (0 to 0) | 0 (0 to 0) | 37.2% (29.5% to 46.8%)    |
| Japan  | Physical violence by other means                | 0 (0 to 0) | 0 (0 to 0) | 0% (-4.5% to 4.3%)        |
| Japan  | Physical violence by sharp object               | 0 (0 to 0) | 0 (0 to 0) | -0.5% (-6.9% to 5.1%)     |
| Japan  | Poisoning by carbon monoxide                    | 0 (0 to 0) | 0 (0 to 0) | 7.3% (3.9% to 10.9%)      |
| Japan  | Poisoning by other means                        | 0 (0 to 0) | 0 (0 to 0) | -9.2% (-11.7% to -6.9%)   |
| Japan  | Pulmonary aspiration and foreign body in airway | 0 (0 to 0) | 0 (0 to 0) | -14.1% (-16.3% to -11.8%) |
| Japan  | Self-harm by firearm                            | 0 (0 to 0) | 0 (0 to 0) | 32.8% (25.4% to 42.8%)    |
| Japan  | Self-harm by other specified means              | 0 (0 to 1) | 0 (0 to 1) | 7% (2.9% to 11.6%)        |
| Japan  | Unintentional firearm injuries                  | 0 (0 to 0) | 0 (0 to 0) | -3% (-7.2% to 1.8%)       |
| Japan  | Venomous animal contact                         | 0 (0 to 0) | 0 (0 to 0) | -14.9% (-17.4% to -12.3%) |
| Jordan | Adverse effects of medical treatment            | 0 (0 to 0) | 0 (0 to 0) | 0% (0% to 0%)             |
| Jordan | Conflict and terrorism                          | 0 (0 to 0) | 0 (0 to 0) | NA                        |
| Jordan | Cyclist road injuries                           | 0 (0 to 0) | 0 (0 to 0) | -3.3% (-11.6% to 7.2%)    |
| Jordan | Drowning                                        | 0 (0 to 0) | 0 (0 to 0) | 117% (85.9% to 149.3%)    |
| Jordan | Environmental heat and cold exposure            | 0 (0 to 0) | 0 (0 to 0) | -0.3% (-6% to 4.7%)       |
| Jordan | Executions and police conflict                  | 0 (0 to 0) | 0 (0 to 0) | NA                        |
| Jordan | Exposure to forces of nature                    | 0 (0 to 0) | 0 (0 to 0) | NA                        |
| Jordan | Falls                                           | 1 (1 to 2) | 2 (1 to 2) | 23.5% (17.5% to 30%)      |
| Jordan | Fire, heat, and hot substances                  | 0 (0 to 0) | 0 (0 to 0) | -35% (-40.9% to -29.2%)   |
| Jordan | Foreign body in eyes                            | 0 (0 to 0) | 0 (0 to 0) | 0% (0% to 0%)             |
| Jordan | Foreign body in other body part                 | 0 (0 to 0) | 0 (0 to 0) | 1.9% (-2.7% to 6.2%)      |
| Jordan | Motor vehicle road injuries                     | 1 (0 to 1) | 0 (0 to 1) | -30.5% (-36.1% to -24.2%) |
| Jordan | Motorcyclist road injuries                      | 0 (0 to 0) | 0 (0 to 0) | -29.3% (-37.4% to -20.3%) |
| Jordan | Non-venomous animal contact                     | 0 (0 to 0) | 0 (0 to 0) | 2.8% (-1.3% to 8%)        |
| Jordan | Other exposure to mechanical forces             | 0 (0 to 0) | 0 (0 to 0) | -7.3% (-17.1% to 1.2%)    |
| Jordan | Other road injuries                             | 0 (0 to 0) | 0 (0 to 0) | -5.1% (-14.4% to 5.6%)    |
| Jordan | Other transport injuries                        | 0 (0 to 0) | 0 (0 to 0) | -23.9% (-28.2% to -19.5%) |
| Jordan | Other unintentional injuries                    | 0 (0 to 0) | 0 (0 to 0) | -17.5% (-24.6% to -10%)   |
| Jordan | Pedestrian road injuries                        | 0 (0 to 0) | 0 (0 to 0) | -36.8% (-42.5% to -30.4%) |
| Jordan | Physical violence by firearm                    | 0 (0 to 0) | 0 (0 to 0) | 101.3% (74.8% to 136%)    |
| Jordan | Physical violence by other means                | 0 (0 to 0) | 0 (0 to 0) | -13.2% (-21.9% to -4.8%)  |
| Jordan | Physical violence by sharp object               | 0 (0 to 0) | 0 (0 to 0) | -13.2% (-23.7% to -3.6%)  |
| Jordan | Poisoning by carbon monoxide                    | 0 (0 to 0) | 0 (0 to 0) | 6% (-7.2% to 19.8%)       |



|            |                                                 |            |            |                           |
|------------|-------------------------------------------------|------------|------------|---------------------------|
| Jordan     | Poisoning by other means                        | 0 (0 to 0) | 0 (0 to 0) | -26.2% (-35.2% to -17.6%) |
| Jordan     | Pulmonary aspiration and foreign body in airway | 0 (0 to 0) | 0 (0 to 0) | -17.1% (-24.3% to -9.9%)  |
| Jordan     | Self-harm by firearm                            | 0 (0 to 0) | 0 (0 to 0) | 18.9% (4.3% to 39.4%)     |
| Jordan     | Self-harm by other specified means              | 0 (0 to 0) | 0 (0 to 0) | -19.2% (-26.8% to -11.7%) |
| Jordan     | Unintentional firearm injuries                  | 0 (0 to 0) | 0 (0 to 0) | 7% (-3.9% to 18.5%)       |
| Jordan     | Venomous animal contact                         | 0 (0 to 0) | 0 (0 to 0) | 1.1% (-4.8% to 7.2%)      |
| Kazakhstan | Adverse effects of medical treatment            | 0 (0 to 0) | 0 (0 to 0) | 0% (0% to 0%)             |
| Kazakhstan | Conflict and terrorism                          | 0 (0 to 0) | 0 (0 to 0) | NA                        |
| Kazakhstan | Cyclist road injuries                           | 0 (0 to 0) | 0 (0 to 0) | -1.6% (-12.1% to 9.7%)    |
| Kazakhstan | Drowning                                        | 0 (0 to 0) | 0 (0 to 0) | 10.9% (-1.1% to 25.3%)    |
| Kazakhstan | Environmental heat and cold exposure            | 0 (0 to 0) | 0 (0 to 0) | 78.9% (56.3% to 108.2%)   |
| Kazakhstan | Executions and police conflict                  | 0 (0 to 0) | 0 (0 to 0) | NA                        |
| Kazakhstan | Exposure to forces of nature                    | 0 (0 to 0) | 0 (0 to 0) | NA                        |
| Kazakhstan | Falls                                           | 3 (2 to 4) | 4 (3 to 5) | 11.1% (6.3% to 15.6%)     |
| Kazakhstan | Fire, heat, and hot substances                  | 0 (0 to 0) | 0 (0 to 0) | -24.1% (-30.7% to -17.3%) |
| Kazakhstan | Foreign body in eyes                            | 0 (0 to 0) | 0 (0 to 0) | 0% (0% to 0%)             |
| Kazakhstan | Foreign body in other body part                 | 0 (0 to 0) | 0 (0 to 0) | -0.3% (-4.8% to 3.6%)     |
| Kazakhstan | Motor vehicle road injuries                     | 1 (1 to 2) | 1 (1 to 2) | -0.2% (-10.9% to 9.5%)    |
| Kazakhstan | Motorcyclist road injuries                      | 0 (0 to 0) | 0 (0 to 0) | -13% (-26% to 0.7%)       |
| Kazakhstan | Non-venomous animal contact                     | 0 (0 to 0) | 0 (0 to 0) | -15.2% (-19.6% to -10.9%) |
| Kazakhstan | Other exposure to mechanical forces             | 1 (0 to 2) | 1 (0 to 1) | -12% (-18.5% to -6%)      |
| Kazakhstan | Other road injuries                             | 0 (0 to 0) | 0 (0 to 0) | -1.6% (-12.8% to 10.3%)   |
| Kazakhstan | Other transport injuries                        | 0 (0 to 0) | 0 (0 to 0) | -12.1% (-18% to -5.1%)    |
| Kazakhstan | Other unintentional injuries                    | 0 (0 to 0) | 0 (0 to 0) | -1.1% (-6.4% to 3%)       |
| Kazakhstan | Pedestrian road injuries                        | 0 (0 to 1) | 0 (0 to 0) | -26.6% (-36.6% to -16.9%) |
| Kazakhstan | Physical violence by firearm                    | 0 (0 to 0) | 0 (0 to 0) | 14.4% (-4.8% to 33.7%)    |
| Kazakhstan | Physical violence by other means                | 0 (0 to 1) | 0 (0 to 0) | -31.3% (-39.1% to -22.4%) |
| Kazakhstan | Physical violence by sharp object               | 0 (0 to 0) | 0 (0 to 0) | -37.9% (-47.6% to -27.3%) |
| Kazakhstan | Poisoning by carbon monoxide                    | 0 (0 to 0) | 0 (0 to 0) | 36% (20% to 53.7%)        |
| Kazakhstan | Poisoning by other means                        | 0 (0 to 0) | 0 (0 to 0) | -31.4% (-39% to -23.6%)   |
| Kazakhstan | Pulmonary aspiration and foreign body in airway | 0 (0 to 0) | 0 (0 to 0) | -27.8% (-35.3% to -20.9%) |
| Kazakhstan | Self-harm by firearm                            | 0 (0 to 0) | 0 (0 to 0) | -3.2% (-24.6% to 16.2%)   |
| Kazakhstan | Self-harm by other specified means              | 0 (0 to 1) | 1 (0 to 1) | 14% (8.6% to 20%)         |
| Kazakhstan | Unintentional firearm injuries                  | 0 (0 to 0) | 0 (0 to 0) | -22.5% (-33.2% to -11.7%) |
| Kazakhstan | Venomous animal contact                         | 0 (0 to 0) | 0 (0 to 0) | -14.4% (-19.3% to -8.7%)  |
| Kenya      | Adverse effects of medical treatment            | 0 (0 to 0) | 0 (0 to 0) | 0% (0% to 0%)             |
| Kenya      | Conflict and terrorism                          | 0 (0 to 0) | 0 (0 to 0) | NA                        |
| Kenya      | Cyclist road injuries                           | 0 (0 to 1) | 0 (0 to 1) | 8.2% (5.8% to 10.6%)      |
| Kenya      | Drowning                                        | 0 (0 to 0) | 0 (0 to 0) | -19.8% (-23% to -16.8%)   |
| Kenya      | Environmental heat and cold exposure            | 0 (0 to 0) | 0 (0 to 0) | -0.8% (-3.4% to 1.7%)     |
| Kenya      | Executions and police conflict                  | 0 (0 to 0) | 0 (0 to 0) | NA                        |
| Kenya      | Exposure to forces of nature                    | 0 (0 to 0) | 0 (0 to 0) | NA                        |
| Kenya      | Falls                                           | 1 (1 to 2) | 1 (1 to 2) | 6.2% (5% to 7.4%)         |

|          |                                                 |            |            |                           |
|----------|-------------------------------------------------|------------|------------|---------------------------|
| Kenya    | Fire, heat, and hot substances                  | 0 (0 to 0) | 0 (0 to 0) | -10.6% (-12.3% to -9%)    |
| Kenya    | Foreign body in eyes                            | 0 (0 to 0) | 0 (0 to 0) | 0% (0% to 0%)             |
| Kenya    | Foreign body in other body part                 | 0 (0 to 1) | 0 (0 to 1) | -4.1% (-5.1% to -2.8%)    |
| Kenya    | Motor vehicle road injuries                     | 1 (0 to 1) | 1 (0 to 1) | 4.8% (2.6% to 7.2%)       |
| Kenya    | Motorcyclist road injuries                      | 0 (0 to 0) | 0 (0 to 0) | 8.1% (5.7% to 10.4%)      |
| Kenya    | Non-venomous animal contact                     | 0 (0 to 1) | 0 (0 to 0) | -9.9% (-11.5% to -7.9%)   |
| Kenya    | Other exposure to mechanical forces             | 0 (0 to 0) | 0 (0 to 0) | -5.2% (-8.1% to -1.6%)    |
| Kenya    | Other road injuries                             | 0 (0 to 0) | 0 (0 to 0) | -0.3% (-3.1% to 2.6%)     |
| Kenya    | Other transport injuries                        | 0 (0 to 0) | 0 (0 to 0) | -6% (-7.3% to -4.8%)      |
| Kenya    | Other unintentional injuries                    | 0 (0 to 0) | 0 (0 to 0) | -13.4% (-17.5% to -9%)    |
| Kenya    | Pedestrian road injuries                        | 1 (0 to 1) | 1 (0 to 1) | -5.1% (-7.4% to -2.6%)    |
| Kenya    | Physical violence by firearm                    | 0 (0 to 0) | 0 (0 to 0) | 10.1% (7.7% to 12.8%)     |
| Kenya    | Physical violence by other means                | 0 (0 to 0) | 0 (0 to 0) | 6.2% (4.4% to 7.8%)       |
| Kenya    | Physical violence by sharp object               | 0 (0 to 0) | 0 (0 to 0) | 7.5% (5.7% to 9%)         |
| Kenya    | Poisoning by carbon monoxide                    | 0 (0 to 0) | 0 (0 to 0) | 11.2% (7.4% to 15.7%)     |
| Kenya    | Poisoning by other means                        | 0 (0 to 0) | 0 (0 to 0) | -10.6% (-13.5% to -7.7%)  |
| Kenya    | Pulmonary aspiration and foreign body in airway | 0 (0 to 0) | 0 (0 to 0) | -11.4% (-13.5% to -9.6%)  |
| Kenya    | Self-harm by firearm                            | 0 (0 to 0) | 0 (0 to 0) | 14.4% (8% to 24.2%)       |
| Kenya    | Self-harm by other specified means              | 0 (0 to 0) | 0 (0 to 0) | -4.9% (-8.3% to -1.3%)    |
| Kenya    | Unintentional firearm injuries                  | 0 (0 to 0) | 0 (0 to 0) | -15.4% (-19.6% to -11%)   |
| Kenya    | Venomous animal contact                         | 0 (0 to 0) | 0 (0 to 0) | -20% (-24.1% to -16.2%)   |
| Kiribati | Adverse effects of medical treatment            | 0 (0 to 0) | 0 (0 to 0) | 0% (0% to 0%)             |
| Kiribati | Conflict and terrorism                          | 0 (0 to 0) | 0 (0 to 0) | NA                        |
| Kiribati | Cyclist road injuries                           | 0 (0 to 0) | 0 (0 to 0) | -2% (-12.1% to 8.2%)      |
| Kiribati | Drowning                                        | 0 (0 to 0) | 0 (0 to 0) | -11.8% (-18.4% to -4.2%)  |
| Kiribati | Environmental heat and cold exposure            | 0 (0 to 0) | 0 (0 to 0) | 12.6% (5.9% to 19.6%)     |
| Kiribati | Executions and police conflict                  | 0 (0 to 0) | 0 (0 to 0) | NA                        |
| Kiribati | Exposure to forces of nature                    | 0 (0 to 0) | 0 (0 to 0) | NA                        |
| Kiribati | Falls                                           | 1 (1 to 1) | 1 (1 to 1) | 38.9% (33.7% to 44.9%)    |
| Kiribati | Fire, heat, and hot substances                  | 0 (0 to 0) | 0 (0 to 0) | 4.7% (-0.6% to 12%)       |
| Kiribati | Foreign body in eyes                            | 0 (0 to 0) | 0 (0 to 0) | 0% (0% to 0%)             |
| Kiribati | Foreign body in other body part                 | 0 (0 to 0) | 0 (0 to 0) | -1.9% (-5.4% to 1.7%)     |
| Kiribati | Motor vehicle road injuries                     | 0 (0 to 1) | 0 (0 to 0) | -14.7% (-23.9% to -5.8%)  |
| Kiribati | Motorcyclist road injuries                      | 0 (0 to 0) | 0 (0 to 1) | 56.9% (38.5% to 80.7%)    |
| Kiribati | Non-venomous animal contact                     | 0 (0 to 0) | 0 (0 to 0) | -1.9% (-6.3% to 2.2%)     |
| Kiribati | Other exposure to mechanical forces             | 0 (0 to 0) | 0 (0 to 0) | -17.6% (-26% to -10.8%)   |
| Kiribati | Other road injuries                             | 0 (0 to 0) | 0 (0 to 0) | -8.3% (-19.7% to 3.9%)    |
| Kiribati | Other transport injuries                        | 0 (0 to 0) | 0 (0 to 0) | -17.3% (-24% to -11.4%)   |
| Kiribati | Other unintentional injuries                    | 0 (0 to 0) | 0 (0 to 0) | -7.5% (-12.5% to -2.4%)   |
| Kiribati | Pedestrian road injuries                        | 0 (0 to 0) | 0 (0 to 0) | -33.2% (-43.2% to -22.8%) |
| Kiribati | Physical violence by firearm                    | 0 (0 to 0) | 0 (0 to 0) | -9% (-18.6% to 1.8%)      |
| Kiribati | Physical violence by other means                | 0 (0 to 1) | 0 (0 to 0) | -25.9% (-31.6% to -19.6%) |
| Kiribati | Physical violence by sharp object               | 0 (0 to 0) | 0 (0 to 0) | -22.5% (-29.9% to -14%)   |

|            |                                                 |              |            |                           |
|------------|-------------------------------------------------|--------------|------------|---------------------------|
| Kiribati   | Poisoning by carbon monoxide                    | 0 (0 to 0)   | 0 (0 to 0) | 21% (7.8% to 36.5%)       |
| Kiribati   | Poisoning by other means                        | 0 (0 to 0)   | 0 (0 to 0) | -17% (-24.8% to -9.5%)    |
| Kiribati   | Pulmonary aspiration and foreign body in airway | 0 (0 to 0)   | 0 (0 to 0) | -1.2% (-11.2% to 9.2%)    |
| Kiribati   | Self-harm by firearm                            | 0 (0 to 0)   | 0 (0 to 0) | -2.4% (-21.3% to 20.8%)   |
| Kiribati   | Self-harm by other specified means              | 0 (0 to 1)   | 0 (0 to 1) | -14.7% (-19.9% to -8.7%)  |
| Kiribati   | Unintentional firearm injuries                  | 0 (0 to 0)   | 0 (0 to 0) | 1% (-5.7% to 8.2%)        |
| Kiribati   | Venomous animal contact                         | 0 (0 to 0)   | 0 (0 to 0) | 4.2% (-2.6% to 11.5%)     |
| Kuwait     | Adverse effects of medical treatment            | 0 (0 to 0)   | 0 (0 to 0) | 0% (0% to 0%)             |
| Kuwait     | Conflict and terrorism                          | 31 (7 to 92) | 0 (0 to 0) | NA                        |
| Kuwait     | Cyclist road injuries                           | 0 (0 to 0)   | 0 (0 to 0) | -21.2% (-29.6% to -11.6%) |
| Kuwait     | Drowning                                        | 0 (0 to 0)   | 0 (0 to 0) | 94.8% (68.6% to 132.5%)   |
| Kuwait     | Environmental heat and cold exposure            | 0 (0 to 0)   | 0 (0 to 0) | 3.3% (-1.9% to 8.6%)      |
| Kuwait     | Executions and police conflict                  | 0 (0 to 0)   | 0 (0 to 0) | NA                        |
| Kuwait     | Exposure to forces of nature                    | 0 (0 to 0)   | 0 (0 to 0) | NA                        |
| Kuwait     | Falls                                           | 2 (1 to 3)   | 2 (2 to 3) | 14.6% (9.9% to 19.7%)     |
| Kuwait     | Fire, heat, and hot substances                  | 0 (0 to 0)   | 0 (0 to 0) | 2.2% (-3.4% to 7.5%)      |
| Kuwait     | Foreign body in eyes                            | 0 (0 to 0)   | 0 (0 to 0) | 0% (0% to 0%)             |
| Kuwait     | Foreign body in other body part                 | 0 (0 to 0)   | 0 (0 to 0) | 0.3% (-3% to 4%)          |
| Kuwait     | Motor vehicle road injuries                     | 1 (0 to 2)   | 1 (0 to 1) | -28.1% (-35.7% to -20.6%) |
| Kuwait     | Motorcyclist road injuries                      | 0 (0 to 0)   | 0 (0 to 0) | -14.9% (-26.8% to -2.7%)  |
| Kuwait     | Non-venomous animal contact                     | 0 (0 to 0)   | 0 (0 to 0) | 2.5% (-1.4% to 6.4%)      |
| Kuwait     | Other exposure to mechanical forces             | 0 (0 to 0)   | 0 (0 to 0) | 0.2% (-8.3% to 8.1%)      |
| Kuwait     | Other road injuries                             | 0 (0 to 0)   | 0 (0 to 0) | -13.3% (-24% to -1%)      |
| Kuwait     | Other transport injuries                        | 0 (0 to 0)   | 0 (0 to 0) | -22.2% (-27.3% to -17.2%) |
| Kuwait     | Other unintentional injuries                    | 0 (0 to 0)   | 0 (0 to 0) | 6.3% (-0.5% to 12.8%)     |
| Kuwait     | Pedestrian road injuries                        | 0 (0 to 1)   | 0 (0 to 0) | -38.3% (-45.6% to -31.3%) |
| Kuwait     | Physical violence by firearm                    | 0 (0 to 0)   | 0 (0 to 0) | 38.1% (20.3% to 60.2%)    |
| Kuwait     | Physical violence by other means                | 0 (0 to 0)   | 0 (0 to 0) | -22% (-29.6% to -14.1%)   |
| Kuwait     | Physical violence by sharp object               | 0 (0 to 0)   | 0 (0 to 0) | -32.9% (-41.8% to -25.1%) |
| Kuwait     | Poisoning by carbon monoxide                    | 0 (0 to 0)   | 0 (0 to 0) | 15.8% (5% to 28%)         |
| Kuwait     | Poisoning by other means                        | 0 (0 to 0)   | 0 (0 to 0) | -10% (-16.8% to -1.4%)    |
| Kuwait     | Pulmonary aspiration and foreign body in airway | 0 (0 to 0)   | 0 (0 to 0) | -12.9% (-21.3% to -4.8%)  |
| Kuwait     | Self-harm by firearm                            | 0 (0 to 0)   | 0 (0 to 0) | 30.1% (18.4% to 44%)      |
| Kuwait     | Self-harm by other specified means              | 0 (0 to 0)   | 0 (0 to 0) | 11.4% (4.1% to 18.9%)     |
| Kuwait     | Unintentional firearm injuries                  | 0 (0 to 0)   | 0 (0 to 0) | 8.3% (-1.3% to 19.3%)     |
| Kuwait     | Venomous animal contact                         | 0 (0 to 0)   | 0 (0 to 0) | 2.8% (-3.9% to 9.1%)      |
| Kyrgyzstan | Adverse effects of medical treatment            | 0 (0 to 0)   | 0 (0 to 0) | 0% (0% to 0%)             |
| Kyrgyzstan | Conflict and terrorism                          | 0 (0 to 0)   | 0 (0 to 0) | NA                        |
| Kyrgyzstan | Cyclist road injuries                           | 0 (0 to 0)   | 0 (0 to 0) | -2.9% (-12.1% to 7%)      |
| Kyrgyzstan | Drowning                                        | 0 (0 to 0)   | 0 (0 to 0) | -5.9% (-18.1% to 5.6%)    |
| Kyrgyzstan | Environmental heat and cold exposure            | 0 (0 to 0)   | 0 (0 to 0) | 10% (-1.1% to 21.7%)      |
| Kyrgyzstan | Executions and police conflict                  | 0 (0 to 0)   | 0 (0 to 0) | NA                        |
| Kyrgyzstan | Exposure to forces of nature                    | 0 (0 to 0)   | 0 (0 to 0) | NA                        |

|                                  |                                                 |             |            |                           |
|----------------------------------|-------------------------------------------------|-------------|------------|---------------------------|
| Kyrgyzstan                       | Falls                                           | 3 (3 to 4)  | 2 (2 to 3) | -28.6% (-33.5% to -22.9%) |
| Kyrgyzstan                       | Fire, heat, and hot substances                  | 0 (0 to 0)  | 0 (0 to 0) | -29.2% (-37.7% to -20.5%) |
| Kyrgyzstan                       | Foreign body in eyes                            | 0 (0 to 0)  | 0 (0 to 0) | 0% (0% to 0%)             |
| Kyrgyzstan                       | Foreign body in other body part                 | 0 (0 to 0)  | 0 (0 to 0) | 0.3% (-4% to 4.2%)        |
| Kyrgyzstan                       | Motor vehicle road injuries                     | 1 (1 to 2)  | 1 (1 to 2) | -6% (-15.1% to 3.5%)      |
| Kyrgyzstan                       | Motorcyclist road injuries                      | 0 (0 to 0)  | 0 (0 to 0) | -38.5% (-48.4% to -27.9%) |
| Kyrgyzstan                       | Non-venomous animal contact                     | 0 (0 to 0)  | 0 (0 to 0) | 8.6% (4.2% to 14%)        |
| Kyrgyzstan                       | Other exposure to mechanical forces             | 1 (0 to 1)  | 1 (0 to 1) | -2.7% (-8% to 2%)         |
| Kyrgyzstan                       | Other road injuries                             | 0 (0 to 0)  | 0 (0 to 0) | -23.7% (-33.8% to -13.3%) |
| Kyrgyzstan                       | Other transport injuries                        | 0 (0 to 0)  | 0 (0 to 0) | -3.3% (-7.8% to 1.8%)     |
| Kyrgyzstan                       | Other unintentional injuries                    | 0 (0 to 0)  | 0 (0 to 0) | -22% (-28.1% to -15.6%)   |
| Kyrgyzstan                       | Pedestrian road injuries                        | 0 (0 to 1)  | 0 (0 to 0) | -12.9% (-24% to -1.4%)    |
| Kyrgyzstan                       | Physical violence by firearm                    | 0 (0 to 0)  | 0 (0 to 0) | -11.4% (-28.2% to 6.8%)   |
| Kyrgyzstan                       | Physical violence by other means                | 0 (0 to 1)  | 0 (0 to 0) | -49.2% (-55.5% to -42.2%) |
| Kyrgyzstan                       | Physical violence by sharp object               | 0 (0 to 0)  | 0 (0 to 0) | -55.1% (-62% to -47.7%)   |
| Kyrgyzstan                       | Poisoning by carbon monoxide                    | 0 (0 to 0)  | 0 (0 to 0) | -17.3% (-32.3% to 1.4%)   |
| Kyrgyzstan                       | Poisoning by other means                        | 0 (0 to 0)  | 0 (0 to 0) | -16.8% (-27.5% to -4.9%)  |
| Kyrgyzstan                       | Pulmonary aspiration and foreign body in airway | 0 (0 to 0)  | 0 (0 to 0) | -14.9% (-22.8% to -7.2%)  |
| Kyrgyzstan                       | Self-harm by firearm                            | 0 (0 to 0)  | 0 (0 to 0) | -25% (-39.4% to -9%)      |
| Kyrgyzstan                       | Self-harm by other specified means              | 0 (0 to 0)  | 0 (0 to 0) | -19.7% (-23.9% to -15.3%) |
| Kyrgyzstan                       | Unintentional firearm injuries                  | 0 (0 to 0)  | 0 (0 to 0) | -4.6% (-12.6% to 3.4%)    |
| Kyrgyzstan                       | Venomous animal contact                         | 0 (0 to 0)  | 0 (0 to 0) | 2.6% (-3.7% to 8.8%)      |
| Lao People's Democratic Republic | Adverse effects of medical treatment            | 0 (0 to 0)  | 0 (0 to 0) | 0% (0% to 0%)             |
| Lao People's Democratic Republic | Conflict and terrorism                          | 3 (1 to 11) | 0 (0 to 0) | NA                        |
| Lao People's Democratic Republic | Cyclist road injuries                           | 0 (0 to 0)  | 0 (0 to 0) | -7.3% (-15.6% to 1%)      |
| Lao People's Democratic Republic | Drowning                                        | 0 (0 to 0)  | 0 (0 to 0) | -43.4% (-47.5% to -37.8%) |
| Lao People's Democratic Republic | Environmental heat and cold exposure            | 0 (0 to 0)  | 0 (0 to 0) | -7% (-12.6% to -1.8%)     |
| Lao People's Democratic Republic | Executions and police conflict                  | 0 (0 to 0)  | 0 (0 to 0) | NA                        |
| Lao People's Democratic Republic | Exposure to forces of nature                    | 0 (0 to 0)  | 0 (0 to 0) | NA                        |
| Lao People's Democratic Republic | Falls                                           | 1 (1 to 1)  | 1 (1 to 2) | 39.1% (33.8% to 44.8%)    |
| Lao People's Democratic Republic | Fire, heat, and hot substances                  | 0 (0 to 0)  | 0 (0 to 0) | -33.2% (-39% to -28.4%)   |
| Lao People's Democratic Republic | Foreign body in eyes                            | 0 (0 to 0)  | 0 (0 to 0) | 0% (0% to 0%)             |
| Lao People's Democratic Republic | Foreign body in other body part                 | 0 (0 to 0)  | 0 (0 to 0) | -3.5% (-7.2% to 0.5%)     |
| Lao People's Democratic Republic | Motor vehicle road injuries                     | 0 (0 to 1)  | 0 (0 to 1) | -12% (-19.3% to -4.1%)    |
| Lao People's Democratic Republic | Motorcyclist road injuries                      | 1 (0 to 1)  | 1 (0 to 1) | 1.8% (-6.7% to 10.8%)     |
| Lao People's Democratic Republic | Non-venomous animal contact                     | 0 (0 to 0)  | 0 (0 to 0) | -36% (-39.6% to -32.6%)   |
| Lao People's Democratic Republic | Other exposure to mechanical forces             | 0 (0 to 0)  | 0 (0 to 0) | -13% (-20.2% to -7%)      |
| Lao People's Democratic Republic | Other road injuries                             | 0 (0 to 0)  | 0 (0 to 0) | -0.9% (-10.6% to 8.6%)    |
| Lao People's Democratic Republic | Other transport injuries                        | 0 (0 to 0)  | 0 (0 to 0) | -28% (-32.6% to -23.2%)   |
| Lao People's Democratic Republic | Other unintentional injuries                    | 0 (0 to 0)  | 0 (0 to 0) | -14.2% (-19.2% to -8.9%)  |
| Lao People's Democratic Republic | Pedestrian road injuries                        | 0 (0 to 0)  | 0 (0 to 0) | -30.5% (-36.3% to -23.9%) |
| Lao People's Democratic Republic | Physical violence by firearm                    | 0 (0 to 0)  | 0 (0 to 0) | -25.9% (-32.2% to -17.7%) |
| Lao People's Democratic Republic | Physical violence by other means                | 0 (0 to 1)  | 0 (0 to 1) | -25.5% (-30.8% to -19.2%) |

|                                  |                                                 |              |            |                           |
|----------------------------------|-------------------------------------------------|--------------|------------|---------------------------|
| Lao People's Democratic Republic | Physical violence by sharp object               | 0 (0 to 1)   | 0 (0 to 0) | -20.4% (-26.8% to -12.5%) |
| Lao People's Democratic Republic | Poisoning by carbon monoxide                    | 0 (0 to 0)   | 0 (0 to 0) | 16.6% (-2.1% to 38.6%)    |
| Lao People's Democratic Republic | Poisoning by other means                        | 0 (0 to 0)   | 0 (0 to 0) | -28.1% (-36.5% to -19.4%) |
| Lao People's Democratic Republic | Pulmonary aspiration and foreign body in airway | 0 (0 to 0)   | 0 (0 to 0) | -37.7% (-45.6% to -30.5%) |
| Lao People's Democratic Republic | Self-harm by firearm                            | 0 (0 to 0)   | 0 (0 to 0) | -5% (-22.1% to 13.4%)     |
| Lao People's Democratic Republic | Self-harm by other specified means              | 0 (0 to 0)   | 0 (0 to 0) | -33.5% (-37.4% to -28.5%) |
| Lao People's Democratic Republic | Unintentional firearm injuries                  | 0 (0 to 0)   | 0 (0 to 0) | -18% (-26.2% to -10.9%)   |
| Lao People's Democratic Republic | Venomous animal contact                         | 0 (0 to 0)   | 0 (0 to 0) | -33.8% (-41.7% to -27%)   |
| Latvia                           | Adverse effects of medical treatment            | 0 (0 to 0)   | 0 (0 to 0) | 0% (0% to 0%)             |
| Latvia                           | Conflict and terrorism                          | 0 (0 to 0)   | 0 (0 to 0) | NA                        |
| Latvia                           | Cyclist road injuries                           | 1 (0 to 1)   | 0 (0 to 1) | -41% (-49.1% to -31.8%)   |
| Latvia                           | Drowning                                        | 0 (0 to 0)   | 0 (0 to 0) | -8.2% (-17.6% to 1.2%)    |
| Latvia                           | Environmental heat and cold exposure            | 0 (0 to 0)   | 0 (0 to 1) | 27.1% (15.8% to 41.9%)    |
| Latvia                           | Executions and police conflict                  | 0 (0 to 0)   | 0 (0 to 0) | NA                        |
| Latvia                           | Exposure to forces of nature                    | 0 (0 to 0)   | 0 (0 to 0) | NA                        |
| Latvia                           | Falls                                           | 9 (7 to 12)  | 6 (4 to 8) | -34.5% (-37.9% to -31%)   |
| Latvia                           | Fire, heat, and hot substances                  | 0 (0 to 0)   | 0 (0 to 0) | -38.8% (-43.1% to -33.9%) |
| Latvia                           | Foreign body in eyes                            | 0 (0 to 0)   | 0 (0 to 0) | 0% (0% to 0%)             |
| Latvia                           | Foreign body in other body part                 | 0 (0 to 0)   | 0 (0 to 0) | 2.3% (-2.1% to 6.4%)      |
| Latvia                           | Motor vehicle road injuries                     | 3 (2 to 5)   | 1 (1 to 3) | -50.5% (-57.4% to -41.9%) |
| Latvia                           | Motorcyclist road injuries                      | 0 (0 to 1)   | 0 (0 to 0) | -49.7% (-59.4% to -38.5%) |
| Latvia                           | Non-venomous animal contact                     | 0 (0 to 0)   | 0 (0 to 0) | -11% (-15.6% to -6.3%)    |
| Latvia                           | Other exposure to mechanical forces             | 1 (1 to 2)   | 1 (0 to 2) | -25.2% (-33% to -16.6%)   |
| Latvia                           | Other road injuries                             | 0 (0 to 0)   | 0 (0 to 0) | -15.5% (-26.8% to -2.5%)  |
| Latvia                           | Other transport injuries                        | 0 (0 to 0)   | 0 (0 to 0) | -41.2% (-46.3% to -36.4%) |
| Latvia                           | Other unintentional injuries                    | 0 (0 to 0)   | 0 (0 to 0) | -11.9% (-18.9% to -5.4%)  |
| Latvia                           | Pedestrian road injuries                        | 1 (0 to 2)   | 0 (0 to 1) | -63.8% (-69.5% to -57.9%) |
| Latvia                           | Physical violence by firearm                    | 0 (0 to 0)   | 0 (0 to 0) | -18% (-36.5% to 2.9%)     |
| Latvia                           | Physical violence by other means                | 1 (0 to 1)   | 0 (0 to 1) | -36.7% (-43.4% to -29%)   |
| Latvia                           | Physical violence by sharp object               | 0 (0 to 0)   | 0 (0 to 0) | -43.9% (-51.9% to -35.7%) |
| Latvia                           | Poisoning by carbon monoxide                    | 0 (0 to 0)   | 0 (0 to 0) | -0.6% (-17.3% to 17.2%)   |
| Latvia                           | Poisoning by other means                        | 0 (0 to 0)   | 0 (0 to 0) | 5.7% (-6.3% to 18.1%)     |
| Latvia                           | Pulmonary aspiration and foreign body in airway | 0 (0 to 0)   | 0 (0 to 0) | -20.8% (-27.3% to -14%)   |
| Latvia                           | Self-harm by firearm                            | 0 (0 to 0)   | 0 (0 to 0) | -33.4% (-43.7% to -23.3%) |
| Latvia                           | Self-harm by other specified means              | 1 (0 to 1)   | 0 (0 to 1) | -37.3% (-41.4% to -32.4%) |
| Latvia                           | Unintentional firearm injuries                  | 0 (0 to 0)   | 0 (0 to 0) | -2.4% (-15.1% to 11.1%)   |
| Latvia                           | Venomous animal contact                         | 0 (0 to 0)   | 0 (0 to 0) | -8.1% (-14.2% to -1.3%)   |
| Lebanon                          | Adverse effects of medical treatment            | 0 (0 to 0)   | 0 (0 to 0) | 0% (0% to 0%)             |
| Lebanon                          | Conflict and terrorism                          | 12 (2 to 35) | 0 (0 to 0) | NA                        |
| Lebanon                          | Cyclist road injuries                           | 0 (0 to 0)   | 0 (0 to 0) | 2.6% (-4.7% to 12.6%)     |
| Lebanon                          | Drowning                                        | 0 (0 to 0)   | 0 (0 to 0) | 133.1% (103.2% to 162.3%) |
| Lebanon                          | Environmental heat and cold exposure            | 0 (0 to 0)   | 0 (0 to 0) | 3.5% (-1.7% to 7.4%)      |
| Lebanon                          | Executions and police conflict                  | 0 (0 to 0)   | 0 (0 to 0) | NA                        |

|         |                                                 |            |            |                           |
|---------|-------------------------------------------------|------------|------------|---------------------------|
| Lebanon | Exposure to forces of nature                    | 0 (0 to 0) | 0 (0 to 0) | NA                        |
| Lebanon | Falls                                           | 1 (1 to 2) | 2 (2 to 3) | 54.8% (49.1% to 60.7%)    |
| Lebanon | Fire, heat, and hot substances                  | 0 (0 to 0) | 0 (0 to 0) | -22.7% (-28.6% to -16.4%) |
| Lebanon | Foreign body in eyes                            | 0 (0 to 0) | 0 (0 to 0) | 0% (0% to 0%)             |
| Lebanon | Foreign body in other body part                 | 0 (0 to 0) | 0 (0 to 0) | -0.7% (-4.9% to 3.4%)     |
| Lebanon | Motor vehicle road injuries                     | 0 (0 to 1) | 0 (0 to 1) | -20.4% (-26.1% to -14.3%) |
| Lebanon | Motorcyclist road injuries                      | 0 (0 to 0) | 0 (0 to 0) | -5.6% (-14.1% to 4.7%)    |
| Lebanon | Non-venomous animal contact                     | 0 (0 to 0) | 0 (0 to 0) | -2.8% (-8% to 2%)         |
| Lebanon | Other exposure to mechanical forces             | 0 (0 to 0) | 0 (0 to 0) | -12.8% (-19.1% to -7.4%)  |
| Lebanon | Other road injuries                             | 0 (0 to 0) | 0 (0 to 0) | 4.5% (-3.6% to 14.7%)     |
| Lebanon | Other transport injuries                        | 0 (0 to 0) | 0 (0 to 0) | -0.5% (-4.4% to 3.3%)     |
| Lebanon | Other unintentional injuries                    | 0 (0 to 0) | 0 (0 to 0) | -6.5% (-11.2% to -1.4%)   |
| Lebanon | Pedestrian road injuries                        | 0 (0 to 0) | 0 (0 to 0) | -16.8% (-24% to -8.7%)    |
| Lebanon | Physical violence by firearm                    | 0 (0 to 0) | 0 (0 to 0) | -0.8% (-19.6% to 27.5%)   |
| Lebanon | Physical violence by other means                | 1 (0 to 2) | 0 (0 to 1) | -65% (-70.6% to -58%)     |
| Lebanon | Physical violence by sharp object               | 0 (0 to 1) | 0 (0 to 0) | -77.9% (-82.2% to -72.8%) |
| Lebanon | Poisoning by carbon monoxide                    | 0 (0 to 0) | 0 (0 to 0) | 34.6% (20.5% to 49.3%)    |
| Lebanon | Poisoning by other means                        | 0 (0 to 0) | 0 (0 to 0) | -19.4% (-27.4% to -12.1%) |
| Lebanon | Pulmonary aspiration and foreign body in airway | 0 (0 to 0) | 0 (0 to 0) | -13.2% (-20.9% to -5.3%)  |
| Lebanon | Self-harm by firearm                            | 0 (0 to 0) | 0 (0 to 0) | 34.3% (22.6% to 50.4%)    |
| Lebanon | Self-harm by other specified means              | 0 (0 to 0) | 0 (0 to 0) | 9% (2.9% to 16.6%)        |
| Lebanon | Unintentional firearm injuries                  | 0 (0 to 0) | 0 (0 to 0) | -3% (-10% to 4.5%)        |
| Lebanon | Venomous animal contact                         | 0 (0 to 0) | 0 (0 to 0) | 1.2% (-5.4% to 8.6%)      |
| Lesotho | Adverse effects of medical treatment            | 0 (0 to 0) | 0 (0 to 0) | 0% (0% to 0%)             |
| Lesotho | Conflict and terrorism                          | 0 (0 to 0) | 0 (0 to 0) | NA                        |
| Lesotho | Cyclist road injuries                           | 0 (0 to 1) | 1 (0 to 1) | 52.1% (40.1% to 66.4%)    |
| Lesotho | Drowning                                        | 0 (0 to 0) | 0 (0 to 0) | -4.6% (-12.2% to 3.1%)    |
| Lesotho | Environmental heat and cold exposure            | 0 (0 to 0) | 0 (0 to 0) | 2.8% (-2.2% to 7.7%)      |
| Lesotho | Executions and police conflict                  | 0 (0 to 0) | 0 (0 to 0) | NA                        |
| Lesotho | Exposure to forces of nature                    | 0 (0 to 1) | 0 (0 to 0) | NA                        |
| Lesotho | Falls                                           | 2 (2 to 3) | 3 (2 to 4) | 15.6% (11.9% to 20.3%)    |
| Lesotho | Fire, heat, and hot substances                  | 0 (0 to 0) | 0 (0 to 0) | 18.6% (11.3% to 27.1%)    |
| Lesotho | Foreign body in eyes                            | 0 (0 to 0) | 0 (0 to 0) | 0% (0% to 0%)             |
| Lesotho | Foreign body in other body part                 | 1 (0 to 1) | 1 (0 to 1) | -2.7% (-6.7% to 1%)       |
| Lesotho | Motor vehicle road injuries                     | 1 (0 to 1) | 1 (1 to 2) | 62.5% (49.7% to 77.1%)    |
| Lesotho | Motorcyclist road injuries                      | 0 (0 to 0) | 0 (0 to 1) | 97.8% (76.5% to 123.2%)   |
| Lesotho | Non-venomous animal contact                     | 0 (0 to 1) | 0 (0 to 1) | -7.1% (-11.8% to -1.8%)   |
| Lesotho | Other exposure to mechanical forces             | 0 (0 to 0) | 0 (0 to 0) | -0.2% (-5.5% to 6%)       |
| Lesotho | Other road injuries                             | 0 (0 to 0) | 0 (0 to 0) | 29.9% (18.8% to 41.3%)    |
| Lesotho | Other transport injuries                        | 0 (0 to 1) | 0 (0 to 1) | 7.8% (2.4% to 13.8%)      |
| Lesotho | Other unintentional injuries                    | 0 (0 to 0) | 0 (0 to 0) | -4.9% (-9.9% to 0.5%)     |
| Lesotho | Pedestrian road injuries                        | 1 (1 to 2) | 2 (1 to 3) | 48.7% (37.9% to 58.8%)    |
| Lesotho | Physical violence by firearm                    | 0 (0 to 0) | 0 (0 to 0) | 22.4% (9.5% to 35.1%)     |



|         |                                                 |                |             |                           |
|---------|-------------------------------------------------|----------------|-------------|---------------------------|
| Lesotho | Physical violence by other means                | 0 (0 to 1)     | 0 (0 to 1)  | 36.5% (26.2% to 47.8%)    |
| Lesotho | Physical violence by sharp object               | 0 (0 to 0)     | 0 (0 to 0)  | 39.3% (25.1% to 54%)      |
| Lesotho | Poisoning by carbon monoxide                    | 0 (0 to 0)     | 0 (0 to 0)  | 4.6% (-5.1% to 16%)       |
| Lesotho | Poisoning by other means                        | 0 (0 to 0)     | 0 (0 to 0)  | -4.2% (-11.6% to 2.9%)    |
| Lesotho | Pulmonary aspiration and foreign body in airway | 0 (0 to 0)     | 0 (0 to 0)  | -3.6% (-11% to 5.6%)      |
| Lesotho | Self-harm by firearm                            | 0 (0 to 0)     | 0 (0 to 0)  | 96.2% (66.3% to 137.8%)   |
| Lesotho | Self-harm by other specified means              | 0 (0 to 0)     | 0 (0 to 0)  | 75.4% (65.9% to 85.7%)    |
| Lesotho | Unintentional firearm injuries                  | 0 (0 to 0)     | 0 (0 to 0)  | -8.9% (-17.1% to -0.9%)   |
| Lesotho | Venomous animal contact                         | 0 (0 to 0)     | 0 (0 to 0)  | -15.7% (-21.3% to -9.5%)  |
| Liberia | Adverse effects of medical treatment            | 0 (0 to 0)     | 0 (0 to 0)  | 0% (0% to 0%)             |
| Liberia | Conflict and terrorism                          | 58 (11 to 179) | 0 (0 to 0)  | NA                        |
| Liberia | Cyclist road injuries                           | 1 (0 to 2)     | 1 (1 to 2)  | 6.4% (-0.1% to 13.7%)     |
| Liberia | Drowning                                        | 0 (0 to 0)     | 0 (0 to 0)  | -14.5% (-22% to -7.2%)    |
| Liberia | Environmental heat and cold exposure            | 0 (0 to 0)     | 0 (0 to 0)  | 0.7% (-5% to 8.1%)        |
| Liberia | Executions and police conflict                  | 0 (0 to 0)     | 0 (0 to 0)  | NA                        |
| Liberia | Exposure to forces of nature                    | 0 (0 to 0)     | 0 (0 to 0)  | NA                        |
| Liberia | Falls                                           | 2 (2 to 4)     | 3 (2 to 4)  | 18.3% (13.7% to 23%)      |
| Liberia | Fire, heat, and hot substances                  | 0 (0 to 0)     | 0 (0 to 0)  | -9.9% (-16.4% to -4.1%)   |
| Liberia | Foreign body in eyes                            | 0 (0 to 0)     | 0 (0 to 0)  | 0% (0% to 0%)             |
| Liberia | Foreign body in other body part                 | 1 (0 to 1)     | 1 (0 to 1)  | -0.3% (-4.1% to 3.3%)     |
| Liberia | Motor vehicle road injuries                     | 1 (1 to 3)     | 1 (1 to 2)  | -3% (-9.8% to 4.1%)       |
| Liberia | Motorcyclist road injuries                      | 1 (0 to 1)     | 1 (0 to 1)  | -0.7% (-7.9% to 7.3%)     |
| Liberia | Non-venomous animal contact                     | 0 (0 to 0)     | 0 (0 to 0)  | 4.4% (0.2% to 8.8%)       |
| Liberia | Other exposure to mechanical forces             | 0 (0 to 0)     | 0 (0 to 0)  | -12.3% (-17.3% to -7.5%)  |
| Liberia | Other road injuries                             | 0 (0 to 0)     | 0 (0 to 0)  | 7.8% (-1.3% to 17%)       |
| Liberia | Other transport injuries                        | 0 (0 to 0)     | 0 (0 to 0)  | -1.7% (-7.1% to 3.1%)     |
| Liberia | Other unintentional injuries                    | 0 (0 to 1)     | 0 (0 to 0)  | -15.4% (-20.7% to -10.3%) |
| Liberia | Pedestrian road injuries                        | 2 (1 to 3)     | 1 (1 to 3)  | -6.8% (-12.6% to -0.7%)   |
| Liberia | Physical violence by firearm                    | 0 (0 to 0)     | 0 (0 to 0)  | -0.9% (-15% to 15.6%)     |
| Liberia | Physical violence by other means                | 0 (0 to 0)     | 0 (0 to 0)  | -26.9% (-32.7% to -20.3%) |
| Liberia | Physical violence by sharp object               | 0 (0 to 0)     | 0 (0 to 0)  | -24.2% (-30.7% to -16.4%) |
| Liberia | Poisoning by carbon monoxide                    | 0 (0 to 0)     | 0 (0 to 0)  | 12.6% (-2.2% to 30.2%)    |
| Liberia | Poisoning by other means                        | 0 (0 to 0)     | 0 (0 to 0)  | -22.3% (-29.5% to -14.2%) |
| Liberia | Pulmonary aspiration and foreign body in airway | 0 (0 to 0)     | 0 (0 to 0)  | -11.2% (-21.7% to -0.8%)  |
| Liberia | Self-harm by firearm                            | 0 (0 to 0)     | 0 (0 to 0)  | 9.7% (-2.2% to 23%)       |
| Liberia | Self-harm by other specified means              | 0 (0 to 0)     | 0 (0 to 0)  | 12.3% (6.9% to 18.1%)     |
| Liberia | Unintentional firearm injuries                  | 0 (0 to 0)     | 0 (0 to 0)  | -19.3% (-26.2% to -12.6%) |
| Liberia | Venomous animal contact                         | 0 (0 to 0)     | 0 (0 to 0)  | 4.8% (-1.8% to 12.1%)     |
| Libya   | Adverse effects of medical treatment            | 0 (0 to 0)     | 0 (0 to 0)  | 0% (0% to 0%)             |
| Libya   | Conflict and terrorism                          | 0 (0 to 0)     | 6 (1 to 19) | NA                        |
| Libya   | Cyclist road injuries                           | 0 (0 to 0)     | 0 (0 to 0)  | 0% (-9.1% to 10.4%)       |
| Libya   | Drowning                                        | 0 (0 to 0)     | 0 (0 to 0)  | 25.1% (8.6% to 47.3%)     |
| Libya   | Environmental heat and cold exposure            | 0 (0 to 0)     | 0 (0 to 0)  | 0.2% (-4.6% to 4.6%)      |

|           |                                                 |             |            |                           |
|-----------|-------------------------------------------------|-------------|------------|---------------------------|
| Libya     | Executions and police conflict                  | 0 (0 to 0)  | 0 (0 to 0) | NA                        |
| Libya     | Exposure to forces of nature                    | 0 (0 to 0)  | 0 (0 to 0) | NA                        |
| Libya     | Falls                                           | 2 (1 to 2)  | 2 (2 to 3) | 19.4% (15% to 23.9%)      |
| Libya     | Fire, heat, and hot substances                  | 0 (0 to 0)  | 0 (0 to 0) | -26.3% (-31% to -21.3%)   |
| Libya     | Foreign body in eyes                            | 0 (0 to 0)  | 0 (0 to 0) | 0% (0% to 0%)             |
| Libya     | Foreign body in other body part                 | 0 (0 to 0)  | 0 (0 to 0) | -0.7% (-4.6% to 3.4%)     |
| Libya     | Motor vehicle road injuries                     | 1 (1 to 2)  | 1 (0 to 1) | -24.8% (-30.4% to -19.6%) |
| Libya     | Motorcyclist road injuries                      | 0 (0 to 0)  | 0 (0 to 0) | -10.9% (-21.2% to -0.1%)  |
| Libya     | Non-venomous animal contact                     | 0 (0 to 0)  | 0 (0 to 0) | 18.6% (13.3% to 23.5%)    |
| Libya     | Other exposure to mechanical forces             | 0 (0 to 1)  | 0 (0 to 0) | -18.1% (-23.3% to -13.2%) |
| Libya     | Other road injuries                             | 0 (0 to 0)  | 0 (0 to 0) | 0.8% (-9.3% to 10.7%)     |
| Libya     | Other transport injuries                        | 0 (0 to 0)  | 0 (0 to 0) | -1.8% (-6.3% to 2.9%)     |
| Libya     | Other unintentional injuries                    | 0 (0 to 0)  | 0 (0 to 0) | -10.1% (-14.8% to -5.1%)  |
| Libya     | Pedestrian road injuries                        | 0 (0 to 1)  | 0 (0 to 0) | -26% (-32.7% to -19.1%)   |
| Libya     | Physical violence by firearm                    | 0 (0 to 0)  | 0 (0 to 0) | 452.6% (353.8% to 602.8%) |
| Libya     | Physical violence by other means                | 0 (0 to 0)  | 1 (0 to 1) | 220% (169.9% to 282.4%)   |
| Libya     | Physical violence by sharp object               | 0 (0 to 0)  | 0 (0 to 0) | 129.3% (87.1% to 175.9%)  |
| Libya     | Poisoning by carbon monoxide                    | 0 (0 to 0)  | 0 (0 to 0) | 17.6% (5.6% to 30.5%)     |
| Libya     | Poisoning by other means                        | 0 (0 to 0)  | 0 (0 to 0) | -21.5% (-27.7% to -15%)   |
| Libya     | Pulmonary aspiration and foreign body in airway | 0 (0 to 0)  | 0 (0 to 0) | -3.9% (-11.5% to 4.3%)    |
| Libya     | Self-harm by firearm                            | 0 (0 to 0)  | 0 (0 to 0) | 31.3% (18.7% to 45.3%)    |
| Libya     | Self-harm by other specified means              | 0 (0 to 0)  | 0 (0 to 0) | 11.3% (5.2% to 17%)       |
| Libya     | Unintentional firearm injuries                  | 0 (0 to 0)  | 0 (0 to 0) | -11.7% (-18.7% to -4.6%)  |
| Libya     | Venomous animal contact                         | 0 (0 to 0)  | 0 (0 to 0) | 18.1% (10.8% to 25.5%)    |
| Lithuania | Adverse effects of medical treatment            | 0 (0 to 0)  | 0 (0 to 0) | 0% (0% to 0%)             |
| Lithuania | Conflict and terrorism                          | 0 (0 to 0)  | 0 (0 to 0) | NA                        |
| Lithuania | Cyclist road injuries                           | 1 (0 to 2)  | 1 (0 to 1) | -39.1% (-47% to -30.7%)   |
| Lithuania | Drowning                                        | 0 (0 to 0)  | 0 (0 to 0) | -14.4% (-23.2% to -4.9%)  |
| Lithuania | Environmental heat and cold exposure            | 0 (0 to 1)  | 0 (0 to 1) | 8% (0.3% to 18.4%)        |
| Lithuania | Executions and police conflict                  | 0 (0 to 0)  | 0 (0 to 0) | NA                        |
| Lithuania | Exposure to forces of nature                    | 0 (0 to 0)  | 0 (0 to 0) | NA                        |
| Lithuania | Falls                                           | 8 (6 to 10) | 7 (5 to 9) | -11.5% (-15.6% to -7.3%)  |
| Lithuania | Fire, heat, and hot substances                  | 0 (0 to 0)  | 0 (0 to 0) | -28.7% (-35.5% to -22%)   |
| Lithuania | Foreign body in eyes                            | 0 (0 to 0)  | 0 (0 to 0) | 0% (0% to 0%)             |
| Lithuania | Foreign body in other body part                 | 0 (0 to 0)  | 0 (0 to 0) | 1.9% (-2.4% to 6.3%)      |
| Lithuania | Motor vehicle road injuries                     | 3 (1 to 5)  | 2 (1 to 3) | -41.7% (-49.6% to -33.9%) |
| Lithuania | Motorcyclist road injuries                      | 0 (0 to 0)  | 0 (0 to 0) | -20.4% (-34.1% to -7.5%)  |
| Lithuania | Non-venomous animal contact                     | 0 (0 to 0)  | 0 (0 to 0) | -12.7% (-17.1% to -8.7%)  |
| Lithuania | Other exposure to mechanical forces             | 1 (1 to 2)  | 1 (0 to 2) | -11.3% (-18.6% to -4.4%)  |
| Lithuania | Other road injuries                             | 0 (0 to 0)  | 0 (0 to 0) | -44% (-53.2% to -33.7%)   |
| Lithuania | Other transport injuries                        | 0 (0 to 0)  | 0 (0 to 0) | -18.4% (-23.8% to -12.8%) |
| Lithuania | Other unintentional injuries                    | 0 (0 to 1)  | 0 (0 to 0) | -22.5% (-29.3% to -15.7%) |
| Lithuania | Pedestrian road injuries                        | 1 (1 to 2)  | 0 (0 to 1) | -63.8% (-68.7% to -58.4%) |

|            |                                                 |            |             |                           |
|------------|-------------------------------------------------|------------|-------------|---------------------------|
| Lithuania  | Physical violence by firearm                    | 0 (0 to 0) | 0 (0 to 0)  | -28.7% (-45.5% to -10.4%) |
| Lithuania  | Physical violence by other means                | 0 (0 to 1) | 0 (0 to 1)  | -21.8% (-29.8% to -12.4%) |
| Lithuania  | Physical violence by sharp object               | 0 (0 to 0) | 0 (0 to 0)  | -39.1% (-47.9% to -30.7%) |
| Lithuania  | Poisoning by carbon monoxide                    | 0 (0 to 0) | 0 (0 to 0)  | 4.2% (-6.6% to 15.5%)     |
| Lithuania  | Poisoning by other means                        | 0 (0 to 0) | 0 (0 to 0)  | -6.4% (-15.8% to 3.7%)    |
| Lithuania  | Pulmonary aspiration and foreign body in airway | 0 (0 to 0) | 0 (0 to 0)  | -17.1% (-23.6% to -10.7%) |
| Lithuania  | Self-harm by firearm                            | 0 (0 to 0) | 0 (0 to 0)  | -15.3% (-31.1% to 3%)     |
| Lithuania  | Self-harm by other specified means              | 1 (0 to 1) | 1 (0 to 1)  | -13.1% (-17.4% to -8%)    |
| Lithuania  | Unintentional firearm injuries                  | 0 (0 to 0) | 0 (0 to 0)  | -9.2% (-20.2% to 2.4%)    |
| Lithuania  | Venomous animal contact                         | 0 (0 to 0) | 0 (0 to 0)  | -4.5% (-10.4% to 2.6%)    |
| Luxembourg | Adverse effects of medical treatment            | 0 (0 to 0) | 0 (0 to 0)  | 0% (0% to 0%)             |
| Luxembourg | Conflict and terrorism                          | 0 (0 to 0) | 0 (0 to 0)  | NA                        |
| Luxembourg | Cyclist road injuries                           | 0 (0 to 0) | 0 (0 to 0)  | -18.2% (-29.2% to -5.4%)  |
| Luxembourg | Drowning                                        | 0 (0 to 0) | 0 (0 to 0)  | 79.1% (62.9% to 96.5%)    |
| Luxembourg | Environmental heat and cold exposure            | 0 (0 to 0) | 0 (0 to 0)  | 0.1% (-4.2% to 4.5%)      |
| Luxembourg | Executions and police conflict                  | 0 (0 to 0) | 0 (0 to 0)  | NA                        |
| Luxembourg | Exposure to forces of nature                    | 0 (0 to 0) | 0 (0 to 0)  | NA                        |
| Luxembourg | Falls                                           | 7 (5 to 9) | 7 (5 to 10) | 6.5% (1.8% to 11.4%)      |
| Luxembourg | Fire, heat, and hot substances                  | 0 (0 to 0) | 0 (0 to 0)  | -5.1% (-9.9% to 0.9%)     |
| Luxembourg | Foreign body in eyes                            | 0 (0 to 0) | 0 (0 to 0)  | 0% (0% to 0%)             |
| Luxembourg | Foreign body in other body part                 | 0 (0 to 0) | 0 (0 to 0)  | 2% (-1.9% to 5.9%)        |
| Luxembourg | Motor vehicle road injuries                     | 1 (0 to 1) | 0 (0 to 1)  | -55.4% (-61.8% to -49%)   |
| Luxembourg | Motorcyclist road injuries                      | 0 (0 to 0) | 0 (0 to 0)  | -11.7% (-27.1% to 7.1%)   |
| Luxembourg | Non-venomous animal contact                     | 0 (0 to 0) | 0 (0 to 0)  | -19.2% (-22.8% to -15.4%) |
| Luxembourg | Other exposure to mechanical forces             | 1 (0 to 1) | 0 (0 to 1)  | -22.9% (-30.2% to -15.8%) |
| Luxembourg | Other road injuries                             | 0 (0 to 0) | 0 (0 to 0)  | -3.2% (-16.8% to 12.8%)   |
| Luxembourg | Other transport injuries                        | 0 (0 to 0) | 0 (0 to 0)  | -0.1% (-5.7% to 5%)       |
| Luxembourg | Other unintentional injuries                    | 1 (0 to 1) | 0 (0 to 0)  | -46.9% (-51.2% to -42.2%) |
| Luxembourg | Pedestrian road injuries                        | 0 (0 to 0) | 0 (0 to 0)  | -60.1% (-67.3% to -51.9%) |
| Luxembourg | Physical violence by firearm                    | 0 (0 to 0) | 0 (0 to 0)  | 42.4% (25.4% to 65.3%)    |
| Luxembourg | Physical violence by other means                | 0 (0 to 0) | 0 (0 to 0)  | -26.5% (-34.6% to -18.1%) |
| Luxembourg | Physical violence by sharp object               | 0 (0 to 0) | 0 (0 to 0)  | -26.1% (-37% to -16.3%)   |
| Luxembourg | Poisoning by carbon monoxide                    | 0 (0 to 0) | 0 (0 to 0)  | 4.7% (-3.5% to 13.1%)     |
| Luxembourg | Poisoning by other means                        | 0 (0 to 0) | 0 (0 to 0)  | -9% (-14.8% to -3.6%)     |
| Luxembourg | Pulmonary aspiration and foreign body in airway | 0 (0 to 0) | 0 (0 to 0)  | -22.4% (-29.4% to -16.3%) |
| Luxembourg | Self-harm by firearm                            | 0 (0 to 0) | 0 (0 to 0)  | 4.9% (-8.9% to 21.4%)     |
| Luxembourg | Self-harm by other specified means              | 0 (0 to 1) | 0 (0 to 0)  | -39% (-43.9% to -33.8%)   |
| Luxembourg | Unintentional firearm injuries                  | 0 (0 to 0) | 0 (0 to 0)  | -1.6% (-10.6% to 8%)      |
| Luxembourg | Venomous animal contact                         | 0 (0 to 0) | 0 (0 to 0)  | -18.3% (-23.5% to -12%)   |
| Madagascar | Adverse effects of medical treatment            | 0 (0 to 0) | 0 (0 to 0)  | 0% (0% to 0%)             |
| Madagascar | Conflict and terrorism                          | 0 (0 to 0) | 0 (0 to 0)  | NA                        |
| Madagascar | Cyclist road injuries                           | 1 (1 to 3) | 1 (1 to 3)  | -3.2% (-9.9% to 4.4%)     |
| Madagascar | Drowning                                        | 0 (0 to 0) | 0 (0 to 0)  | -12.3% (-20.3% to -4.1%)  |

|            |                                                 |            |            |                           |
|------------|-------------------------------------------------|------------|------------|---------------------------|
| Madagascar | Environmental heat and cold exposure            | 0 (0 to 0) | 0 (0 to 0) | -3.6% (-9.2% to 2.5%)     |
| Madagascar | Executions and police conflict                  | 0 (0 to 0) | 0 (0 to 0) | NA                        |
| Madagascar | Exposure to forces of nature                    | 0 (0 to 0) | 0 (0 to 0) | NA                        |
| Madagascar | Falls                                           | 3 (2 to 4) | 3 (2 to 5) | 13.5% (9% to 17.9%)       |
| Madagascar | Fire, heat, and hot substances                  | 0 (0 to 0) | 0 (0 to 0) | -14.5% (-19.8% to -9.6%)  |
| Madagascar | Foreign body in eyes                            | 0 (0 to 0) | 0 (0 to 0) | 0% (0% to 0%)             |
| Madagascar | Foreign body in other body part                 | 1 (0 to 1) | 1 (0 to 1) | 3.8% (-0.8% to 8.3%)      |
| Madagascar | Motor vehicle road injuries                     | 1 (1 to 3) | 1 (1 to 2) | -12.1% (-19.7% to -4%)    |
| Madagascar | Motorcyclist road injuries                      | 0 (0 to 1) | 0 (0 to 1) | -12.7% (-20.2% to -4.2%)  |
| Madagascar | Non-venomous animal contact                     | 1 (0 to 1) | 0 (0 to 1) | -10% (-14.5% to -5.9%)    |
| Madagascar | Other exposure to mechanical forces             | 0 (0 to 1) | 0 (0 to 1) | -11.3% (-17% to -5%)      |
| Madagascar | Other road injuries                             | 0 (0 to 0) | 0 (0 to 0) | 6.2% (-3.7% to 17.2%)     |
| Madagascar | Other transport injuries                        | 0 (0 to 1) | 0 (0 to 1) | -3.3% (-8.2% to 1.5%)     |
| Madagascar | Other unintentional injuries                    | 0 (0 to 1) | 0 (0 to 0) | -12.2% (-17.8% to -6%)    |
| Madagascar | Pedestrian road injuries                        | 2 (1 to 5) | 2 (1 to 4) | -16.8% (-22.4% to -10.4%) |
| Madagascar | Physical violence by firearm                    | 0 (0 to 0) | 0 (0 to 0) | 17.8% (5.7% to 32.8%)     |
| Madagascar | Physical violence by other means                | 0 (0 to 0) | 0 (0 to 0) | 5.8% (-1.7% to 15.4%)     |
| Madagascar | Physical violence by sharp object               | 0 (0 to 0) | 0 (0 to 0) | 7.5% (-2.1% to 19.5%)     |
| Madagascar | Poisoning by carbon monoxide                    | 0 (0 to 0) | 0 (0 to 0) | 14.6% (1.4% to 31.1%)     |
| Madagascar | Poisoning by other means                        | 0 (0 to 0) | 0 (0 to 0) | -21.7% (-29.5% to -13%)   |
| Madagascar | Pulmonary aspiration and foreign body in airway | 0 (0 to 0) | 0 (0 to 0) | -7.9% (-18.5% to 2.2%)    |
| Madagascar | Self-harm by firearm                            | 0 (0 to 0) | 0 (0 to 0) | 12.1% (0% to 27.1%)       |
| Madagascar | Self-harm by other specified means              | 0 (0 to 0) | 0 (0 to 0) | -12.9% (-17.7% to -8.4%)  |
| Madagascar | Unintentional firearm injuries                  | 0 (0 to 0) | 0 (0 to 0) | -14.4% (-21.8% to -7.3%)  |
| Madagascar | Venomous animal contact                         | 0 (0 to 0) | 0 (0 to 0) | -21% (-27.6% to -15.1%)   |
| Malawi     | Adverse effects of medical treatment            | 0 (0 to 0) | 0 (0 to 0) | 0% (0% to 0%)             |
| Malawi     | Conflict and terrorism                          | 0 (0 to 0) | 0 (0 to 0) | NA                        |
| Malawi     | Cyclist road injuries                           | 1 (1 to 2) | 1 (1 to 2) | -2.2% (-8.2% to 5.1%)     |
| Malawi     | Drowning                                        | 0 (0 to 0) | 0 (0 to 0) | -4.9% (-12% to 1.7%)      |
| Malawi     | Environmental heat and cold exposure            | 0 (0 to 0) | 0 (0 to 0) | -2.6% (-7.7% to 3.8%)     |
| Malawi     | Executions and police conflict                  | 0 (0 to 0) | 0 (0 to 0) | NA                        |
| Malawi     | Exposure to forces of nature                    | 0 (0 to 0) | 0 (0 to 0) | NA                        |
| Malawi     | Falls                                           | 3 (2 to 5) | 4 (3 to 6) | 18.9% (14.6% to 23.2%)    |
| Malawi     | Fire, heat, and hot substances                  | 0 (0 to 0) | 0 (0 to 0) | -7.9% (-13.6% to -2.7%)   |
| Malawi     | Foreign body in eyes                            | 0 (0 to 0) | 0 (0 to 0) | 0% (0% to 0%)             |
| Malawi     | Foreign body in other body part                 | 1 (0 to 1) | 1 (0 to 1) | -2.5% (-6.3% to 1.9%)     |
| Malawi     | Motor vehicle road injuries                     | 1 (0 to 2) | 1 (0 to 2) | -5% (-12.6% to 3.4%)      |
| Malawi     | Motorcyclist road injuries                      | 0 (0 to 1) | 0 (0 to 1) | -18.7% (-25.6% to -11.5%) |
| Malawi     | Non-venomous animal contact                     | 0 (0 to 1) | 0 (0 to 1) | -11.9% (-16.3% to -7.5%)  |
| Malawi     | Other exposure to mechanical forces             | 0 (0 to 0) | 0 (0 to 0) | -2.6% (-8% to 3%)         |
| Malawi     | Other road injuries                             | 0 (0 to 0) | 0 (0 to 0) | 1.7% (-7.4% to 12.4%)     |
| Malawi     | Other transport injuries                        | 0 (0 to 0) | 0 (0 to 0) | 0% (-4.6% to 4.6%)        |
| Malawi     | Other unintentional injuries                    | 0 (0 to 0) | 0 (0 to 0) | -7.3% (-14% to -0.4%)     |

|          |                                                 |            |            |                           |
|----------|-------------------------------------------------|------------|------------|---------------------------|
| Malawi   | Pedestrian road injuries                        | 2 (1 to 3) | 2 (1 to 3) | -11.9% (-17.4% to -4.6%)  |
| Malawi   | Physical violence by firearm                    | 0 (0 to 0) | 0 (0 to 0) | 34.6% (21.7% to 52%)      |
| Malawi   | Physical violence by other means                | 0 (0 to 0) | 0 (0 to 0) | 8.9% (3.3% to 15.8%)      |
| Malawi   | Physical violence by sharp object               | 0 (0 to 0) | 0 (0 to 0) | 9% (2.1% to 17.3%)        |
| Malawi   | Poisoning by carbon monoxide                    | 0 (0 to 0) | 0 (0 to 0) | 13.3% (0.6% to 25.9%)     |
| Malawi   | Poisoning by other means                        | 0 (0 to 0) | 0 (0 to 0) | -17.3% (-24.2% to -9.7%)  |
| Malawi   | Pulmonary aspiration and foreign body in airway | 0 (0 to 0) | 0 (0 to 0) | -11.4% (-21.2% to -1.1%)  |
| Malawi   | Self-harm by firearm                            | 0 (0 to 0) | 0 (0 to 0) | 13.9% (1.1% to 31%)       |
| Malawi   | Self-harm by other specified means              | 0 (0 to 0) | 0 (0 to 0) | -11.2% (-16.7% to -5%)    |
| Malawi   | Unintentional firearm injuries                  | 0 (0 to 0) | 0 (0 to 0) | -9.9% (-18.1% to -1.3%)   |
| Malawi   | Venomous animal contact                         | 0 (0 to 0) | 0 (0 to 0) | -13.6% (-22.7% to -4.5%)  |
| Malaysia | Adverse effects of medical treatment            | 0 (0 to 0) | 0 (0 to 0) | 0% (0% to 0%)             |
| Malaysia | Conflict and terrorism                          | 0 (0 to 0) | 0 (0 to 0) | NA                        |
| Malaysia | Cyclist road injuries                           | 0 (0 to 0) | 0 (0 to 0) | 1.2% (-8% to 10.3%)       |
| Malaysia | Drowning                                        | 0 (0 to 0) | 0 (0 to 0) | 49.6% (34.9% to 64.4%)    |
| Malaysia | Environmental heat and cold exposure            | 0 (0 to 0) | 0 (0 to 0) | 3.8% (-0.4% to 8.8%)      |
| Malaysia | Executions and police conflict                  | 0 (0 to 0) | 0 (0 to 0) | NA                        |
| Malaysia | Exposure to forces of nature                    | 0 (0 to 0) | 0 (0 to 0) | NA                        |
| Malaysia | Falls                                           | 1 (1 to 2) | 2 (1 to 3) | 41.2% (36% to 45.8%)      |
| Malaysia | Fire, heat, and hot substances                  | 0 (0 to 0) | 0 (0 to 0) | -10.9% (-15.1% to -6.7%)  |
| Malaysia | Foreign body in eyes                            | 0 (0 to 0) | 0 (0 to 0) | 0% (0% to 0%)             |
| Malaysia | Foreign body in other body part                 | 0 (0 to 0) | 0 (0 to 0) | 0.7% (-2.5% to 4.4%)      |
| Malaysia | Motor vehicle road injuries                     | 1 (0 to 1) | 1 (0 to 1) | 8.1% (-0.9% to 18.5%)     |
| Malaysia | Motorcyclist road injuries                      | 1 (0 to 1) | 1 (0 to 1) | 5.2% (-4.2% to 16.8%)     |
| Malaysia | Non-venomous animal contact                     | 0 (0 to 0) | 0 (0 to 0) | -24.8% (-28.6% to -21.2%) |
| Malaysia | Other exposure to mechanical forces             | 0 (0 to 0) | 0 (0 to 0) | -10.7% (-16.2% to -5.5%)  |
| Malaysia | Other road injuries                             | 0 (0 to 0) | 0 (0 to 0) | -0.9% (-10.7% to 8.7%)    |
| Malaysia | Other transport injuries                        | 0 (0 to 0) | 0 (0 to 0) | -13.2% (-17.5% to -8.6%)  |
| Malaysia | Other unintentional injuries                    | 0 (0 to 0) | 0 (0 to 0) | -18.8% (-24.7% to -13.9%) |
| Malaysia | Pedestrian road injuries                        | 0 (0 to 0) | 0 (0 to 0) | -10.7% (-18.5% to -3.1%)  |
| Malaysia | Physical violence by firearm                    | 0 (0 to 0) | 0 (0 to 0) | 82.1% (65.6% to 103.8%)   |
| Malaysia | Physical violence by other means                | 0 (0 to 0) | 0 (0 to 0) | 6.1% (-1.1% to 14.1%)     |
| Malaysia | Physical violence by sharp object               | 0 (0 to 0) | 0 (0 to 0) | 0.5% (-8.3% to 10.8%)     |
| Malaysia | Poisoning by carbon monoxide                    | 0 (0 to 0) | 0 (0 to 0) | 28.3% (16.5% to 41%)      |
| Malaysia | Poisoning by other means                        | 0 (0 to 0) | 0 (0 to 0) | -20.7% (-26.8% to -14.2%) |
| Malaysia | Pulmonary aspiration and foreign body in airway | 0 (0 to 0) | 0 (0 to 0) | -17.4% (-24.9% to -9.4%)  |
| Malaysia | Self-harm by firearm                            | 0 (0 to 0) | 0 (0 to 0) | 26.5% (8.3% to 49.9%)     |
| Malaysia | Self-harm by other specified means              | 0 (0 to 0) | 0 (0 to 0) | -3.8% (-9.6% to 2.8%)     |
| Malaysia | Unintentional firearm injuries                  | 0 (0 to 0) | 0 (0 to 0) | -5.7% (-11.7% to 0.4%)    |
| Malaysia | Venomous animal contact                         | 0 (0 to 0) | 0 (0 to 0) | -29.5% (-35.9% to -22.9%) |
| Maldives | Adverse effects of medical treatment            | 0 (0 to 0) | 0 (0 to 0) | 0% (0% to 0%)             |
| Maldives | Conflict and terrorism                          | 0 (0 to 0) | 0 (0 to 0) | NA                        |
| Maldives | Cyclist road injuries                           | 0 (0 to 0) | 0 (0 to 0) | -33.3% (-41.7% to -24.8%) |

|          |                                                 |            |            |                           |
|----------|-------------------------------------------------|------------|------------|---------------------------|
| Maldives | Drowning                                        | 0 (0 to 0) | 0 (0 to 0) | 35.8% (19.8% to 55.2%)    |
| Maldives | Environmental heat and cold exposure            | 0 (0 to 0) | 0 (0 to 0) | -6.4% (-10.9% to -1%)     |
| Maldives | Executions and police conflict                  | 0 (0 to 0) | 0 (0 to 0) | NA                        |
| Maldives | Exposure to forces of nature                    | 0 (0 to 0) | 0 (0 to 0) | NA                        |
| Maldives | Falls                                           | 1 (1 to 2) | 2 (1 to 3) | 52.9% (46.3% to 59.7%)    |
| Maldives | Fire, heat, and hot substances                  | 0 (0 to 0) | 0 (0 to 0) | -35.9% (-43.2% to -29.2%) |
| Maldives | Foreign body in eyes                            | 0 (0 to 0) | 0 (0 to 0) | 0% (0% to 0%)             |
| Maldives | Foreign body in other body part                 | 0 (0 to 0) | 0 (0 to 0) | 1.7% (-2.1% to 5.8%)      |
| Maldives | Motor vehicle road injuries                     | 0 (0 to 0) | 0 (0 to 0) | -11.9% (-20% to -1.7%)    |
| Maldives | Motorcyclist road injuries                      | 1 (0 to 1) | 0 (0 to 1) | -28.7% (-34.9% to -21.8%) |
| Maldives | Non-venomous animal contact                     | 0 (0 to 0) | 0 (0 to 0) | -33.9% (-39.5% to -28.4%) |
| Maldives | Other exposure to mechanical forces             | 0 (0 to 0) | 0 (0 to 0) | -23.1% (-30.9% to -15.3%) |
| Maldives | Other road injuries                             | 0 (0 to 0) | 0 (0 to 0) | 9% (-2.5% to 23.1%)       |
| Maldives | Other transport injuries                        | 0 (0 to 0) | 0 (0 to 0) | 4.9% (-2% to 11.2%)       |
| Maldives | Other unintentional injuries                    | 0 (0 to 0) | 0 (0 to 0) | -30.8% (-37.5% to -22.9%) |
| Maldives | Pedestrian road injuries                        | 0 (0 to 0) | 0 (0 to 0) | -19.3% (-28.3% to -8.4%)  |
| Maldives | Physical violence by firearm                    | 0 (0 to 0) | 0 (0 to 0) | 183.8% (148.9% to 232.1%) |
| Maldives | Physical violence by other means                | 0 (0 to 0) | 0 (0 to 0) | 21.6% (9.9% to 32.5%)     |
| Maldives | Physical violence by sharp object               | 0 (0 to 0) | 0 (0 to 0) | 18.7% (5.6% to 31.7%)     |
| Maldives | Poisoning by carbon monoxide                    | 0 (0 to 0) | 0 (0 to 0) | 48.5% (32.6% to 66.7%)    |
| Maldives | Poisoning by other means                        | 0 (0 to 0) | 0 (0 to 0) | 10.5% (3.9% to 16.7%)     |
| Maldives | Pulmonary aspiration and foreign body in airway | 0 (0 to 0) | 0 (0 to 0) | -37.2% (-44.1% to -29.2%) |
| Maldives | Self-harm by firearm                            | 0 (0 to 0) | 0 (0 to 0) | 35.9% (14.5% to 63.7%)    |
| Maldives | Self-harm by other specified means              | 0 (0 to 0) | 0 (0 to 0) | -23% (-28.8% to -15.9%)   |
| Maldives | Unintentional firearm injuries                  | 0 (0 to 0) | 0 (0 to 0) | -13% (-21.6% to -2.5%)    |
| Maldives | Venomous animal contact                         | 0 (0 to 0) | 0 (0 to 0) | -22.3% (-29.6% to -13.1%) |
| Mali     | Adverse effects of medical treatment            | 0 (0 to 0) | 0 (0 to 0) | 0% (0% to 0%)             |
| Mali     | Conflict and terrorism                          | 2 (0 to 6) | 1 (0 to 4) | NA                        |
| Mali     | Cyclist road injuries                           | 1 (0 to 2) | 1 (1 to 2) | 20% (11.8% to 28.8%)      |
| Mali     | Drowning                                        | 0 (0 to 0) | 0 (0 to 0) | -8.5% (-16.1% to -1%)     |
| Mali     | Environmental heat and cold exposure            | 0 (0 to 0) | 0 (0 to 0) | -1.5% (-6.4% to 5.1%)     |
| Mali     | Executions and police conflict                  | 0 (0 to 0) | 0 (0 to 0) | NA                        |
| Mali     | Exposure to forces of nature                    | 0 (0 to 0) | 0 (0 to 0) | NA                        |
| Mali     | Falls                                           | 3 (2 to 4) | 3 (2 to 5) | 19% (14.6% to 23.6%)      |
| Mali     | Fire, heat, and hot substances                  | 0 (0 to 0) | 0 (0 to 0) | -8.8% (-14.3% to -2.9%)   |
| Mali     | Foreign body in eyes                            | 0 (0 to 0) | 0 (0 to 0) | 0% (0% to 0%)             |
| Mali     | Foreign body in other body part                 | 1 (0 to 1) | 1 (0 to 1) | 0.8% (-2.9% to 4.2%)      |
| Mali     | Motor vehicle road injuries                     | 1 (1 to 3) | 2 (1 to 3) | 9.2% (1.5% to 18.5%)      |
| Mali     | Motorcyclist road injuries                      | 1 (0 to 1) | 1 (0 to 1) | -0.6% (-8.5% to 7.7%)     |
| Mali     | Non-venomous animal contact                     | 0 (0 to 1) | 0 (0 to 0) | -16.2% (-20% to -11.9%)   |
| Mali     | Other exposure to mechanical forces             | 0 (0 to 0) | 0 (0 to 0) | -9% (-13.3% to -3.7%)     |
| Mali     | Other road injuries                             | 0 (0 to 0) | 0 (0 to 0) | 16.8% (5.3% to 28.3%)     |
| Mali     | Other transport injuries                        | 0 (0 to 0) | 0 (0 to 0) | -12% (-16.4% to -7.5%)    |



|                  |                                                 |            |            |                           |
|------------------|-------------------------------------------------|------------|------------|---------------------------|
| Mali             | Other unintentional injuries                    | 0 (0 to 0) | 0 (0 to 0) | -17.2% (-21.3% to -12.8%) |
| Mali             | Pedestrian road injuries                        | 2 (1 to 4) | 2 (1 to 3) | -11.1% (-17.6% to -5%)    |
| Mali             | Physical violence by firearm                    | 0 (0 to 0) | 0 (0 to 0) | 20.3% (8% to 35.8%)       |
| Mali             | Physical violence by other means                | 0 (0 to 0) | 0 (0 to 0) | 1.6% (-3.9% to 7.4%)      |
| Mali             | Physical violence by sharp object               | 0 (0 to 0) | 0 (0 to 0) | 1.9% (-4.6% to 9.5%)      |
| Mali             | Poisoning by carbon monoxide                    | 0 (0 to 0) | 0 (0 to 0) | 13.4% (1.5% to 27.3%)     |
| Mali             | Poisoning by other means                        | 0 (0 to 0) | 0 (0 to 0) | -20.7% (-27.4% to -13.9%) |
| Mali             | Pulmonary aspiration and foreign body in airway | 0 (0 to 0) | 0 (0 to 0) | -14.8% (-22.4% to -7.6%)  |
| Mali             | Self-harm by firearm                            | 0 (0 to 0) | 0 (0 to 0) | 12.5% (2.2% to 26.5%)     |
| Mali             | Self-harm by other specified means              | 0 (0 to 0) | 0 (0 to 0) | -2.9% (-8.3% to 2.7%)     |
| Mali             | Unintentional firearm injuries                  | 0 (0 to 0) | 0 (0 to 0) | -17.3% (-24.8% to -9.9%)  |
| Mali             | Venomous animal contact                         | 0 (0 to 0) | 0 (0 to 0) | -13.4% (-19.6% to -6%)    |
| Malta            | Adverse effects of medical treatment            | 0 (0 to 0) | 0 (0 to 0) | 0% (0% to 0%)             |
| Malta            | Conflict and terrorism                          | 0 (0 to 0) | 0 (0 to 0) | NA                        |
| Malta            | Cyclist road injuries                           | 0 (0 to 0) | 0 (0 to 0) | -7.5% (-16.9% to 3%)      |
| Malta            | Drowning                                        | 0 (0 to 0) | 0 (0 to 0) | 71.8% (57.9% to 87.4%)    |
| Malta            | Environmental heat and cold exposure            | 0 (0 to 0) | 0 (0 to 0) | -8.8% (-13.4% to -3.5%)   |
| Malta            | Executions and police conflict                  | 0 (0 to 0) | 0 (0 to 0) | NA                        |
| Malta            | Exposure to forces of nature                    | 0 (0 to 0) | 0 (0 to 0) | NA                        |
| Malta            | Falls                                           | 6 (4 to 8) | 7 (5 to 9) | 13.2% (9.2% to 17.7%)     |
| Malta            | Fire, heat, and hot substances                  | 0 (0 to 0) | 0 (0 to 0) | -3.5% (-8.2% to 1%)       |
| Malta            | Foreign body in eyes                            | 0 (0 to 0) | 0 (0 to 0) | 0% (0% to 0%)             |
| Malta            | Foreign body in other body part                 | 0 (0 to 0) | 0 (0 to 0) | 2% (-1.3% to 5.9%)        |
| Malta            | Motor vehicle road injuries                     | 0 (0 to 1) | 0 (0 to 0) | -24.6% (-33.6% to -15.3%) |
| Malta            | Motorcyclist road injuries                      | 0 (0 to 0) | 0 (0 to 0) | 4.6% (-11% to 24.1%)      |
| Malta            | Non-venomous animal contact                     | 0 (0 to 0) | 0 (0 to 0) | -18.3% (-21.3% to -15%)   |
| Malta            | Other exposure to mechanical forces             | 1 (0 to 1) | 0 (0 to 1) | -4.4% (-10.3% to 2.7%)    |
| Malta            | Other road injuries                             | 0 (0 to 0) | 0 (0 to 0) | -0.3% (-11% to 12.1%)     |
| Malta            | Other transport injuries                        | 0 (0 to 0) | 0 (0 to 0) | 3.3% (-1% to 7.9%)        |
| Malta            | Other unintentional injuries                    | 0 (0 to 0) | 0 (0 to 0) | -21.2% (-26.3% to -16.9%) |
| Malta            | Pedestrian road injuries                        | 0 (0 to 0) | 0 (0 to 0) | -23% (-34% to -11.7%)     |
| Malta            | Physical violence by firearm                    | 0 (0 to 0) | 0 (0 to 0) | 21.3% (12.3% to 32.8%)    |
| Malta            | Physical violence by other means                | 0 (0 to 0) | 0 (0 to 0) | -7.2% (-13.4% to -0.8%)   |
| Malta            | Physical violence by sharp object               | 0 (0 to 0) | 0 (0 to 0) | -6.3% (-14.3% to 2.7%)    |
| Malta            | Poisoning by carbon monoxide                    | 0 (0 to 0) | 0 (0 to 0) | 13.1% (3.3% to 22.8%)     |
| Malta            | Poisoning by other means                        | 0 (0 to 0) | 0 (0 to 0) | -1.6% (-8.7% to 4.9%)     |
| Malta            | Pulmonary aspiration and foreign body in airway | 0 (0 to 0) | 0 (0 to 0) | -12.1% (-19.5% to -4.6%)  |
| Malta            | Self-harm by firearm                            | 0 (0 to 0) | 0 (0 to 0) | 15.5% (3.4% to 27.1%)     |
| Malta            | Self-harm by other specified means              | 0 (0 to 0) | 0 (0 to 0) | 3.1% (-1.9% to 8.8%)      |
| Malta            | Unintentional firearm injuries                  | 0 (0 to 0) | 0 (0 to 0) | -5.3% (-13.7% to 3%)      |
| Malta            | Venomous animal contact                         | 0 (0 to 0) | 0 (0 to 0) | -18.3% (-23.5% to -12.8%) |
| Marshall Islands | Adverse effects of medical treatment            | 0 (0 to 0) | 0 (0 to 0) | 0% (0% to 0%)             |
| Marshall Islands | Conflict and terrorism                          | 0 (0 to 0) | 0 (0 to 0) | NA                        |

|                  |                                                 |            |            |                           |
|------------------|-------------------------------------------------|------------|------------|---------------------------|
| Marshall Islands | Cyclist road injuries                           | 0 (0 to 0) | 0 (0 to 0) | 0.4% (-5.6% to 7.6%)      |
| Marshall Islands | Drowning                                        | 0 (0 to 0) | 0 (0 to 0) | 4.5% (-3.6% to 14.1%)     |
| Marshall Islands | Environmental heat and cold exposure            | 0 (0 to 0) | 0 (0 to 0) | -2.1% (-7.3% to 2.8%)     |
| Marshall Islands | Executions and police conflict                  | 0 (0 to 0) | 0 (0 to 0) | NA                        |
| Marshall Islands | Exposure to forces of nature                    | 0 (0 to 0) | 0 (0 to 0) | NA                        |
| Marshall Islands | Falls                                           | 1 (1 to 1) | 2 (1 to 2) | 37.9% (32.7% to 42.9%)    |
| Marshall Islands | Fire, heat, and hot substances                  | 0 (0 to 0) | 0 (0 to 0) | -0.7% (-5.5% to 4.6%)     |
| Marshall Islands | Foreign body in eyes                            | 0 (0 to 0) | 0 (0 to 0) | 0% (0% to 0%)             |
| Marshall Islands | Foreign body in other body part                 | 0 (0 to 0) | 0 (0 to 0) | -2.2% (-5.5% to 1.8%)     |
| Marshall Islands | Motor vehicle road injuries                     | 1 (0 to 1) | 1 (0 to 1) | -0.7% (-6.7% to 5.4%)     |
| Marshall Islands | Motorcyclist road injuries                      | 0 (0 to 0) | 0 (0 to 0) | -0.2% (-8.9% to 8.7%)     |
| Marshall Islands | Non-venomous animal contact                     | 0 (0 to 0) | 0 (0 to 0) | -14.6% (-18.2% to -10.7%) |
| Marshall Islands | Other exposure to mechanical forces             | 0 (0 to 0) | 0 (0 to 0) | -14% (-19.6% to -7.6%)    |
| Marshall Islands | Other road injuries                             | 0 (0 to 0) | 0 (0 to 0) | -0.4% (-8.6% to 8.9%)     |
| Marshall Islands | Other transport injuries                        | 0 (0 to 0) | 0 (0 to 0) | -2.8% (-7.2% to 1.6%)     |
| Marshall Islands | Other unintentional injuries                    | 0 (0 to 0) | 0 (0 to 0) | -3.6% (-7.6% to 0.8%)     |
| Marshall Islands | Pedestrian road injuries                        | 0 (0 to 0) | 0 (0 to 0) | -7.2% (-15% to 0.8%)      |
| Marshall Islands | Physical violence by firearm                    | 0 (0 to 0) | 0 (0 to 0) | -14.2% (-24% to -2.9%)    |
| Marshall Islands | Physical violence by other means                | 0 (0 to 1) | 0 (0 to 1) | -5.1% (-11.3% to 1.9%)    |
| Marshall Islands | Physical violence by sharp object               | 0 (0 to 0) | 0 (0 to 0) | -21.6% (-29.6% to -13%)   |
| Marshall Islands | Poisoning by carbon monoxide                    | 0 (0 to 0) | 0 (0 to 0) | 7.2% (-3.8% to 18.6%)     |
| Marshall Islands | Poisoning by other means                        | 0 (0 to 0) | 0 (0 to 0) | -15.6% (-22.3% to -8.3%)  |
| Marshall Islands | Pulmonary aspiration and foreign body in airway | 0 (0 to 0) | 0 (0 to 0) | 4.4% (-7% to 18.2%)       |
| Marshall Islands | Self-harm by firearm                            | 0 (0 to 0) | 0 (0 to 0) | -9.5% (-22.7% to 5.7%)    |
| Marshall Islands | Self-harm by other specified means              | 0 (0 to 1) | 0 (0 to 1) | 0% (-6.1% to 6.4%)        |
| Marshall Islands | Unintentional firearm injuries                  | 0 (0 to 0) | 0 (0 to 0) | -21.9% (-28% to -16.5%)   |
| Marshall Islands | Venomous animal contact                         | 0 (0 to 0) | 0 (0 to 0) | -8.6% (-14.3% to -1.7%)   |
| Mauritania       | Adverse effects of medical treatment            | 0 (0 to 0) | 0 (0 to 0) | 0% (0% to 0%)             |
| Mauritania       | Conflict and terrorism                          | 0 (0 to 1) | 0 (0 to 0) | NA                        |
| Mauritania       | Cyclist road injuries                           | 1 (1 to 2) | 1 (1 to 2) | -3.5% (-10.7% to 4.6%)    |
| Mauritania       | Drowning                                        | 0 (0 to 0) | 0 (0 to 0) | 12.4% (2.3% to 22.2%)     |
| Mauritania       | Environmental heat and cold exposure            | 0 (0 to 0) | 0 (0 to 0) | -6.9% (-11.7% to -2.1%)   |
| Mauritania       | Executions and police conflict                  | 0 (0 to 0) | 0 (0 to 0) | NA                        |
| Mauritania       | Exposure to forces of nature                    | 0 (0 to 0) | 0 (0 to 0) | NA                        |
| Mauritania       | Falls                                           | 3 (2 to 4) | 3 (2 to 5) | 18.9% (14.1% to 23.6%)    |
| Mauritania       | Fire, heat, and hot substances                  | 0 (0 to 0) | 0 (0 to 0) | -8.6% (-14% to -3.5%)     |
| Mauritania       | Foreign body in eyes                            | 0 (0 to 0) | 0 (0 to 0) | 0% (0% to 0%)             |
| Mauritania       | Foreign body in other body part                 | 1 (0 to 1) | 1 (0 to 1) | -1.3% (-5.2% to 2.5%)     |
| Mauritania       | Motor vehicle road injuries                     | 3 (1 to 5) | 3 (1 to 5) | -9.9% (-16.4% to -2.7%)   |
| Mauritania       | Motorcyclist road injuries                      | 1 (0 to 2) | 1 (0 to 2) | -18.4% (-25.3% to -11.2%) |
| Mauritania       | Non-venomous animal contact                     | 0 (0 to 0) | 0 (0 to 0) | -10.6% (-14.6% to -6.8%)  |
| Mauritania       | Other exposure to mechanical forces             | 0 (0 to 0) | 0 (0 to 0) | -14.7% (-19.8% to -9.6%)  |
| Mauritania       | Other road injuries                             | 0 (0 to 0) | 0 (0 to 0) | -5.3% (-13.8% to 4.8%)    |

|            |                                                 |            |            |                           |
|------------|-------------------------------------------------|------------|------------|---------------------------|
| Mauritania | Other transport injuries                        | 0 (0 to 1) | 0 (0 to 0) | -16.3% (-21.5% to -11.7%) |
| Mauritania | Other unintentional injuries                    | 0 (0 to 0) | 0 (0 to 0) | -17.3% (-21.7% to -12.1%) |
| Mauritania | Pedestrian road injuries                        | 3 (1 to 5) | 2 (1 to 4) | -20.7% (-26.2% to -15%)   |
| Mauritania | Physical violence by firearm                    | 0 (0 to 0) | 0 (0 to 0) | 45.7% (25.2% to 73%)      |
| Mauritania | Physical violence by other means                | 0 (0 to 0) | 0 (0 to 0) | 1.3% (-4.3% to 7%)        |
| Mauritania | Physical violence by sharp object               | 0 (0 to 0) | 0 (0 to 0) | 2.4% (-5.2% to 10.8%)     |
| Mauritania | Poisoning by carbon monoxide                    | 0 (0 to 0) | 0 (0 to 0) | 26.7% (13.8% to 41.5%)    |
| Mauritania | Poisoning by other means                        | 0 (0 to 0) | 0 (0 to 0) | -14.2% (-21.7% to -6.7%)  |
| Mauritania | Pulmonary aspiration and foreign body in airway | 0 (0 to 0) | 0 (0 to 0) | -1.9% (-9.3% to 6.2%)     |
| Mauritania | Self-harm by firearm                            | 0 (0 to 0) | 0 (0 to 0) | 5.5% (-4.5% to 18.4%)     |
| Mauritania | Self-harm by other specified means              | 0 (0 to 0) | 0 (0 to 0) | -6% (-11.3% to -0.7%)     |
| Mauritania | Unintentional firearm injuries                  | 0 (0 to 0) | 0 (0 to 0) | -17.5% (-25% to -9%)      |
| Mauritania | Venomous animal contact                         | 0 (0 to 0) | 0 (0 to 0) | -11% (-16.8% to -4.9%)    |
| Mauritius  | Adverse effects of medical treatment            | 0 (0 to 0) | 0 (0 to 0) | 0% (0% to 0%)             |
| Mauritius  | Conflict and terrorism                          | 0 (0 to 0) | 0 (0 to 0) | NA                        |
| Mauritius  | Cyclist road injuries                           | 0 (0 to 1) | 0 (0 to 1) | 8% (-5.9% to 24.9%)       |
| Mauritius  | Drowning                                        | 0 (0 to 0) | 0 (0 to 0) | 21.5% (12.2% to 31.7%)    |
| Mauritius  | Environmental heat and cold exposure            | 0 (0 to 0) | 0 (0 to 0) | -1.3% (-5.8% to 3.4%)     |
| Mauritius  | Executions and police conflict                  | 0 (0 to 0) | 0 (0 to 0) | NA                        |
| Mauritius  | Exposure to forces of nature                    | 0 (0 to 0) | 0 (0 to 0) | NA                        |
| Mauritius  | Falls                                           | 3 (2 to 4) | 5 (3 to 7) | 72.2% (64.8% to 80%)      |
| Mauritius  | Fire, heat, and hot substances                  | 0 (0 to 0) | 0 (0 to 0) | -55.1% (-59.9% to -50.4%) |
| Mauritius  | Foreign body in eyes                            | 0 (0 to 0) | 0 (0 to 0) | 0% (0% to 0%)             |
| Mauritius  | Foreign body in other body part                 | 0 (0 to 0) | 0 (0 to 0) | 1.9% (-2% to 5.5%)        |
| Mauritius  | Motor vehicle road injuries                     | 1 (1 to 2) | 1 (0 to 2) | -27.4% (-38.1% to -16.8%) |
| Mauritius  | Motorcyclist road injuries                      | 1 (1 to 2) | 2 (1 to 3) | 41.7% (24.2% to 68.4%)    |
| Mauritius  | Non-venomous animal contact                     | 0 (0 to 0) | 0 (0 to 0) | -19.9% (-23.1% to -16.4%) |
| Mauritius  | Other exposure to mechanical forces             | 0 (0 to 0) | 0 (0 to 0) | 4.4% (0% to 9.1%)         |
| Mauritius  | Other road injuries                             | 0 (0 to 0) | 0 (0 to 0) | 6.2% (-8.8% to 22.7%)     |
| Mauritius  | Other transport injuries                        | 0 (0 to 0) | 0 (0 to 0) | 19.1% (7.8% to 29.7%)     |
| Mauritius  | Other unintentional injuries                    | 0 (0 to 0) | 0 (0 to 0) | -4.6% (-11.7% to 1.8%)    |
| Mauritius  | Pedestrian road injuries                        | 1 (0 to 1) | 1 (0 to 1) | -27.5% (-37.1% to -17.9%) |
| Mauritius  | Physical violence by firearm                    | 0 (0 to 0) | 0 (0 to 0) | 41.4% (27.7% to 59.4%)    |
| Mauritius  | Physical violence by other means                | 0 (0 to 1) | 0 (0 to 1) | 9.7% (1.5% to 17.7%)      |
| Mauritius  | Physical violence by sharp object               | 0 (0 to 0) | 0 (0 to 0) | 33.8% (18.2% to 54.1%)    |
| Mauritius  | Poisoning by carbon monoxide                    | 0 (0 to 0) | 0 (0 to 0) | 55.2% (35.9% to 81.7%)    |
| Mauritius  | Poisoning by other means                        | 0 (0 to 0) | 0 (0 to 0) | -3.9% (-9.5% to 1.9%)     |
| Mauritius  | Pulmonary aspiration and foreign body in airway | 0 (0 to 0) | 0 (0 to 0) | -2.2% (-11.3% to 8.8%)    |
| Mauritius  | Self-harm by firearm                            | 0 (0 to 0) | 0 (0 to 0) | -1.9% (-16.6% to 18.8%)   |
| Mauritius  | Self-harm by other specified means              | 0 (0 to 0) | 0 (0 to 0) | -24% (-28.9% to -18.3%)   |
| Mauritius  | Unintentional firearm injuries                  | 0 (0 to 0) | 0 (0 to 0) | 5.2% (-1.3% to 12.6%)     |
| Mauritius  | Venomous animal contact                         | 0 (0 to 0) | 0 (0 to 0) | -18.1% (-23.8% to -11%)   |
| Mexico     | Adverse effects of medical treatment            | 0 (0 to 0) | 0 (0 to 0) | 0% (0% to 0%)             |

|                                  |                                                 |              |             |                           |
|----------------------------------|-------------------------------------------------|--------------|-------------|---------------------------|
| Mexico                           | Conflict and terrorism                          | 0 (0 to 0)   | 0 (0 to 0)  | NA                        |
| Mexico                           | Cyclist road injuries                           | 1 (0 to 1)   | 1 (0 to 1)  | -9% (-14.2% to -3.3%)     |
| Mexico                           | Drowning                                        | 0 (0 to 0)   | 0 (0 to 0)  | -39.9% (-44.5% to -35.3%) |
| Mexico                           | Environmental heat and cold exposure            | 0 (0 to 0)   | 0 (0 to 0)  | -37.5% (-43.3% to -31.6%) |
| Mexico                           | Executions and police conflict                  | 0 (0 to 0)   | 0 (0 to 0)  | NA                        |
| Mexico                           | Exposure to forces of nature                    | 0 (0 to 0)   | 0 (0 to 0)  | NA                        |
| Mexico                           | Falls                                           | 10 (7 to 15) | 8 (6 to 12) | -16.8% (-18.6% to -14.8%) |
| Mexico                           | Fire, heat, and hot substances                  | 0 (0 to 0)   | 0 (0 to 0)  | -23% (-27.3% to -19%)     |
| Mexico                           | Foreign body in eyes                            | 0 (0 to 0)   | 0 (0 to 0)  | 0% (0% to 0%)             |
| Mexico                           | Foreign body in other body part                 | 0 (0 to 0)   | 0 (0 to 0)  | -0.3% (-2% to 1.1%)       |
| Mexico                           | Motor vehicle road injuries                     | 1 (1 to 2)   | 1 (1 to 2)  | -1.5% (-5.8% to 3.6%)     |
| Mexico                           | Motorcyclist road injuries                      | 0 (0 to 1)   | 0 (0 to 1)  | 3.7% (-3.2% to 12.3%)     |
| Mexico                           | Non-venomous animal contact                     | 0 (0 to 1)   | 0 (0 to 1)  | -21.3% (-24.6% to -18.2%) |
| Mexico                           | Other exposure to mechanical forces             | 1 (0 to 1)   | 1 (0 to 1)  | -20.9% (-24.5% to -16.8%) |
| Mexico                           | Other road injuries                             | 0 (0 to 0)   | 0 (0 to 0)  | -7.1% (-12.8% to -1.3%)   |
| Mexico                           | Other transport injuries                        | 0 (0 to 0)   | 0 (0 to 0)  | -9.5% (-12.2% to -6.9%)   |
| Mexico                           | Other unintentional injuries                    | 0 (0 to 1)   | 0 (0 to 1)  | -30.3% (-34.6% to -26.1%) |
| Mexico                           | Pedestrian road injuries                        | 1 (1 to 2)   | 1 (0 to 1)  | -37.5% (-41.9% to -33.7%) |
| Mexico                           | Physical violence by firearm                    | 0 (0 to 0)   | 0 (0 to 0)  | 99.5% (80.5% to 123.1%)   |
| Mexico                           | Physical violence by other means                | 0 (0 to 1)   | 0 (0 to 1)  | -3.8% (-12% to 3.2%)      |
| Mexico                           | Physical violence by sharp object               | 0 (0 to 0)   | 0 (0 to 0)  | 20.9% (11.7% to 29.9%)    |
| Mexico                           | Poisoning by carbon monoxide                    | 0 (0 to 0)   | 0 (0 to 0)  | 1.7% (-15.7% to 14.7%)    |
| Mexico                           | Poisoning by other means                        | 0 (0 to 0)   | 0 (0 to 0)  | -9.5% (-17.2% to -1.9%)   |
| Mexico                           | Pulmonary aspiration and foreign body in airway | 0 (0 to 0)   | 0 (0 to 0)  | -40.2% (-44.4% to -36%)   |
| Mexico                           | Self-harm by firearm                            | 0 (0 to 0)   | 0 (0 to 0)  | 12.8% (-2.1% to 25.5%)    |
| Mexico                           | Self-harm by other specified means              | 0 (0 to 0)   | 0 (0 to 0)  | 90.7% (76.5% to 115.5%)   |
| Mexico                           | Unintentional firearm injuries                  | 0 (0 to 0)   | 0 (0 to 0)  | -43.2% (-48.6% to -38.5%) |
| Mexico                           | Venomous animal contact                         | 0 (0 to 0)   | 0 (0 to 0)  | -27% (-31.4% to -23.4%)   |
| Micronesia (Federated States of) | Adverse effects of medical treatment            | 0 (0 to 0)   | 0 (0 to 0)  | 0% (0% to 0%)             |
| Micronesia (Federated States of) | Conflict and terrorism                          | 0 (0 to 0)   | 0 (0 to 0)  | NA                        |
| Micronesia (Federated States of) | Cyclist road injuries                           | 0 (0 to 0)   | 0 (0 to 0)  | -4% (-11.2% to 3.7%)      |
| Micronesia (Federated States of) | Drowning                                        | 0 (0 to 0)   | 0 (0 to 0)  | 8.7% (-2.1% to 20.2%)     |
| Micronesia (Federated States of) | Environmental heat and cold exposure            | 0 (0 to 0)   | 0 (0 to 0)  | -5.2% (-11.2% to 0.7%)    |
| Micronesia (Federated States of) | Executions and police conflict                  | 0 (0 to 0)   | 0 (0 to 0)  | NA                        |
| Micronesia (Federated States of) | Exposure to forces of nature                    | 0 (0 to 0)   | 0 (0 to 0)  | NA                        |
| Micronesia (Federated States of) | Falls                                           | 1 (1 to 1)   | 2 (1 to 2)  | 57.1% (50.6% to 62.8%)    |
| Micronesia (Federated States of) | Fire, heat, and hot substances                  | 0 (0 to 0)   | 0 (0 to 0)  | -2% (-8.1% to 4.5%)       |
| Micronesia (Federated States of) | Foreign body in eyes                            | 0 (0 to 0)   | 0 (0 to 0)  | 0% (0% to 0%)             |
| Micronesia (Federated States of) | Foreign body in other body part                 | 0 (0 to 0)   | 0 (0 to 0)  | -3% (-6% to 0.5%)         |
| Micronesia (Federated States of) | Motor vehicle road injuries                     | 1 (0 to 1)   | 1 (0 to 1)  | -7% (-13% to -0.9%)       |
| Micronesia (Federated States of) | Motorcyclist road injuries                      | 0 (0 to 0)   | 0 (0 to 0)  | 6.3% (-4.3% to 17.9%)     |
| Micronesia (Federated States of) | Non-venomous animal contact                     | 0 (0 to 0)   | 0 (0 to 0)  | -12.2% (-16.5% to -8.5%)  |
| Micronesia (Federated States of) | Other exposure to mechanical forces             | 0 (0 to 0)   | 0 (0 to 0)  | -12.4% (-18.3% to -5.5%)  |

|                                  |                                                 |              |               |                          |
|----------------------------------|-------------------------------------------------|--------------|---------------|--------------------------|
| Micronesia (Federated States of) | Other road injuries                             | 0 (0 to 0)   | 0 (0 to 0)    | -7.6% (-16.7% to 2.2%)   |
| Micronesia (Federated States of) | Other transport injuries                        | 0 (0 to 0)   | 0 (0 to 0)    | -5.4% (-10% to -0.4%)    |
| Micronesia (Federated States of) | Other unintentional injuries                    | 0 (0 to 0)   | 0 (0 to 0)    | -8.1% (-12.2% to -3.7%)  |
| Micronesia (Federated States of) | Pedestrian road injuries                        | 0 (0 to 0)   | 0 (0 to 0)    | -12.3% (-20% to -4.2%)   |
| Micronesia (Federated States of) | Physical violence by firearm                    | 0 (0 to 0)   | 0 (0 to 0)    | -0.5% (-12.5% to 13.4%)  |
| Micronesia (Federated States of) | Physical violence by other means                | 0 (0 to 1)   | 0 (0 to 1)    | 1.9% (-4.7% to 9%)       |
| Micronesia (Federated States of) | Physical violence by sharp object               | 0 (0 to 0)   | 0 (0 to 0)    | -13.9% (-22.3% to -4.8%) |
| Micronesia (Federated States of) | Poisoning by carbon monoxide                    | 0 (0 to 0)   | 0 (0 to 0)    | 14.3% (3.5% to 26.2%)    |
| Micronesia (Federated States of) | Poisoning by other means                        | 0 (0 to 0)   | 0 (0 to 0)    | -18% (-25.1% to -10.5%)  |
| Micronesia (Federated States of) | Pulmonary aspiration and foreign body in airway | 0 (0 to 0)   | 0 (0 to 0)    | -4.1% (-15.2% to 7.7%)   |
| Micronesia (Federated States of) | Self-harm by firearm                            | 0 (0 to 0)   | 0 (0 to 0)    | -4% (-17.9% to 11.1%)    |
| Micronesia (Federated States of) | Self-harm by other specified means              | 0 (0 to 1)   | 0 (0 to 1)    | 0% (-5.7% to 6.4%)       |
| Micronesia (Federated States of) | Unintentional firearm injuries                  | 0 (0 to 0)   | 0 (0 to 0)    | -25.5% (-32.3% to -20%)  |
| Micronesia (Federated States of) | Venomous animal contact                         | 0 (0 to 0)   | 0 (0 to 0)    | -7.7% (-13% to -1.3%)    |
| Monaco                           | Adverse effects of medical treatment            | 0 (0 to 0)   | 0 (0 to 0)    | 0% (0% to 0%)            |
| Monaco                           | Conflict and terrorism                          | 0 (0 to 0)   | 0 (0 to 0)    | NA                       |
| Monaco                           | Cyclist road injuries                           | 1 (0 to 1)   | 1 (0 to 1)    | -16.6% (-23.6% to -8.6%) |
| Monaco                           | Drowning                                        | 0 (0 to 0)   | 0 (0 to 0)    | 86.5% (64.5% to 110.6%)  |
| Monaco                           | Environmental heat and cold exposure            | 0 (0 to 0)   | 0 (0 to 0)    | 1.3% (-3% to 5.7%)       |
| Monaco                           | Executions and police conflict                  | 0 (0 to 0)   | 0 (0 to 0)    | NA                       |
| Monaco                           | Exposure to forces of nature                    | 0 (0 to 0)   | 0 (0 to 0)    | NA                       |
| Monaco                           | Falls                                           | 12 (8 to 18) | 15 (10 to 21) | 20.3% (16.4% to 24.5%)   |
| Monaco                           | Fire, heat, and hot substances                  | 0 (0 to 0)   | 0 (0 to 0)    | 1% (-3% to 4.7%)         |
| Monaco                           | Foreign body in eyes                            | 0 (0 to 0)   | 0 (0 to 0)    | 0% (0% to 0%)            |
| Monaco                           | Foreign body in other body part                 | 0 (0 to 1)   | 0 (0 to 1)    | 1.6% (-1.9% to 4.8%)     |
| Monaco                           | Motor vehicle road injuries                     | 1 (0 to 2)   | 1 (0 to 1)    | -13.4% (-20.4% to -5.9%) |
| Monaco                           | Motorcyclist road injuries                      | 1 (0 to 1)   | 0 (0 to 1)    | -3.9% (-13.1% to 6.8%)   |
| Monaco                           | Non-venomous animal contact                     | 0 (0 to 0)   | 0 (0 to 0)    | -8.9% (-11.9% to -4.7%)  |
| Monaco                           | Other exposure to mechanical forces             | 1 (0 to 1)   | 1 (0 to 1)    | 3.1% (-2% to 8.5%)       |
| Monaco                           | Other road injuries                             | 0 (0 to 0)   | 0 (0 to 0)    | -16.7% (-24.2% to -8.6%) |
| Monaco                           | Other transport injuries                        | 0 (0 to 0)   | 0 (0 to 1)    | 10.5% (6.4% to 15.8%)    |
| Monaco                           | Other unintentional injuries                    | 1 (0 to 1)   | 1 (0 to 1)    | 0.7% (-2.6% to 4.7%)     |
| Monaco                           | Pedestrian road injuries                        | 0 (0 to 1)   | 0 (0 to 1)    | -24% (-31.6% to -16.3%)  |
| Monaco                           | Physical violence by firearm                    | 0 (0 to 0)   | 0 (0 to 0)    | 27.5% (18.2% to 39.2%)   |
| Monaco                           | Physical violence by other means                | 0 (0 to 0)   | 0 (0 to 0)    | 4.6% (-0.4% to 9.8%)     |
| Monaco                           | Physical violence by sharp object               | 0 (0 to 0)   | 0 (0 to 0)    | 3.7% (-4.3% to 12.3%)    |
| Monaco                           | Poisoning by carbon monoxide                    | 0 (0 to 0)   | 0 (0 to 0)    | -1.3% (-9.2% to 7.1%)    |
| Monaco                           | Poisoning by other means                        | 0 (0 to 0)   | 0 (0 to 0)    | -27.9% (-33.4% to -23%)  |
| Monaco                           | Pulmonary aspiration and foreign body in airway | 0 (0 to 0)   | 0 (0 to 0)    | -13.9% (-20.1% to -6.6%) |
| Monaco                           | Self-harm by firearm                            | 0 (0 to 0)   | 0 (0 to 0)    | -1.8% (-10.1% to 8.5%)   |
| Monaco                           | Self-harm by other specified means              | 0 (0 to 0)   | 0 (0 to 0)    | -6.4% (-10.8% to -1%)    |
| Monaco                           | Unintentional firearm injuries                  | 0 (0 to 0)   | 0 (0 to 0)    | 2.5% (-4.6% to 9.9%)     |
| Monaco                           | Venomous animal contact                         | 0 (0 to 0)   | 0 (0 to 0)    | -10.2% (-15.7% to -3.8%) |

|            |                                                 |            |            |                           |
|------------|-------------------------------------------------|------------|------------|---------------------------|
| Mongolia   | Adverse effects of medical treatment            | 0 (0 to 0) | 0 (0 to 0) | 0% (0% to 0%)             |
| Mongolia   | Conflict and terrorism                          | 0 (0 to 0) | 0 (0 to 0) | NA                        |
| Mongolia   | Cyclist road injuries                           | 0 (0 to 0) | 0 (0 to 0) | 7.4% (-1.9% to 16.5%)     |
| Mongolia   | Drowning                                        | 0 (0 to 0) | 0 (0 to 0) | 41.5% (24.8% to 61.4%)    |
| Mongolia   | Environmental heat and cold exposure            | 0 (0 to 0) | 0 (0 to 0) | -34.1% (-37.4% to -30.6%) |
| Mongolia   | Executions and police conflict                  | 0 (0 to 0) | 0 (0 to 0) | NA                        |
| Mongolia   | Exposure to forces of nature                    | 0 (0 to 1) | 0 (0 to 0) | NA                        |
| Mongolia   | Falls                                           | 3 (2 to 4) | 4 (3 to 5) | 32.9% (27.9% to 38.1%)    |
| Mongolia   | Fire, heat, and hot substances                  | 0 (0 to 0) | 0 (0 to 0) | 10% (4.2% to 15.9%)       |
| Mongolia   | Foreign body in eyes                            | 0 (0 to 0) | 0 (0 to 0) | 0% (0% to 0%)             |
| Mongolia   | Foreign body in other body part                 | 0 (0 to 0) | 0 (0 to 0) | 1.5% (-2.6% to 6.2%)      |
| Mongolia   | Motor vehicle road injuries                     | 1 (0 to 1) | 1 (1 to 2) | 53.7% (42.6% to 65.6%)    |
| Mongolia   | Motorcyclist road injuries                      | 0 (0 to 0) | 0 (0 to 0) | 13.5% (1.6% to 28.3%)     |
| Mongolia   | Non-venomous animal contact                     | 0 (0 to 0) | 0 (0 to 0) | -20.8% (-24.9% to -16.6%) |
| Mongolia   | Other exposure to mechanical forces             | 1 (0 to 1) | 1 (0 to 1) | 4.5% (-2% to 11.4%)       |
| Mongolia   | Other road injuries                             | 0 (0 to 0) | 0 (0 to 0) | 26.5% (13.9% to 43.3%)    |
| Mongolia   | Other transport injuries                        | 0 (0 to 0) | 0 (0 to 0) | 5.1% (0.6% to 9.6%)       |
| Mongolia   | Other unintentional injuries                    | 0 (0 to 0) | 0 (0 to 0) | 7% (1.9% to 12.2%)        |
| Mongolia   | Pedestrian road injuries                        | 0 (0 to 0) | 0 (0 to 0) | 17.6% (6.5% to 30.7%)     |
| Mongolia   | Physical violence by firearm                    | 0 (0 to 0) | 0 (0 to 0) | 63% (40.3% to 89.1%)      |
| Mongolia   | Physical violence by other means                | 0 (0 to 1) | 0 (0 to 0) | -15.4% (-22% to -8%)      |
| Mongolia   | Physical violence by sharp object               | 0 (0 to 0) | 0 (0 to 0) | -19.6% (-28.9% to -10.2%) |
| Mongolia   | Poisoning by carbon monoxide                    | 0 (0 to 0) | 0 (0 to 0) | -9.8% (-24.1% to 8.2%)    |
| Mongolia   | Poisoning by other means                        | 0 (0 to 0) | 0 (0 to 0) | -57% (-63.6% to -49.6%)   |
| Mongolia   | Pulmonary aspiration and foreign body in airway | 0 (0 to 0) | 0 (0 to 0) | 1.3% (-4.9% to 9.3%)      |
| Mongolia   | Self-harm by firearm                            | 0 (0 to 0) | 0 (0 to 0) | 21.5% (0.4% to 43.5%)     |
| Mongolia   | Self-harm by other specified means              | 0 (0 to 1) | 0 (0 to 1) | 6.3% (-0.3% to 13.5%)     |
| Mongolia   | Unintentional firearm injuries                  | 0 (0 to 0) | 0 (0 to 0) | -7.7% (-16.6% to 1.6%)    |
| Mongolia   | Venomous animal contact                         | 0 (0 to 0) | 0 (0 to 0) | -19% (-23.8% to -14%)     |
| Montenegro | Adverse effects of medical treatment            | 0 (0 to 0) | 0 (0 to 0) | 0% (0% to 0%)             |
| Montenegro | Conflict and terrorism                          | 0 (0 to 0) | 0 (0 to 0) | NA                        |
| Montenegro | Cyclist road injuries                           | 1 (0 to 1) | 1 (0 to 1) | -4.4% (-12.3% to 3.2%)    |
| Montenegro | Drowning                                        | 0 (0 to 0) | 0 (0 to 0) | 50.3% (32.9% to 67.5%)    |
| Montenegro | Environmental heat and cold exposure            | 0 (0 to 0) | 0 (0 to 0) | -14.8% (-19.7% to -10.2%) |
| Montenegro | Executions and police conflict                  | 0 (0 to 0) | 0 (0 to 0) | NA                        |
| Montenegro | Exposure to forces of nature                    | 0 (0 to 0) | 0 (0 to 0) | NA                        |
| Montenegro | Falls                                           | 6 (4 to 8) | 6 (5 to 8) | 5.5% (1.2% to 10.5%)      |
| Montenegro | Fire, heat, and hot substances                  | 0 (0 to 0) | 0 (0 to 0) | -8.4% (-12.7% to -3.7%)   |
| Montenegro | Foreign body in eyes                            | 0 (0 to 0) | 0 (0 to 0) | 0% (0% to 0%)             |
| Montenegro | Foreign body in other body part                 | 0 (0 to 0) | 0 (0 to 0) | -0.7% (-4.3% to 3%)       |
| Montenegro | Motor vehicle road injuries                     | 1 (1 to 2) | 1 (1 to 2) | 8.5% (0.4% to 18%)        |
| Montenegro | Motorcyclist road injuries                      | 0 (0 to 0) | 0 (0 to 0) | -5.2% (-16.3% to 6.9%)    |
| Montenegro | Non-venomous animal contact                     | 0 (0 to 0) | 0 (0 to 0) | -5.8% (-9.6% to -2.1%)    |



|            |                                                 |            |            |                           |
|------------|-------------------------------------------------|------------|------------|---------------------------|
| Montenegro | Other exposure to mechanical forces             | 1 (1 to 3) | 1 (1 to 3) | -1.7% (-6.8% to 3%)       |
| Montenegro | Other road injuries                             | 0 (0 to 0) | 0 (0 to 0) | -0.6% (-10% to 8.5%)      |
| Montenegro | Other transport injuries                        | 0 (0 to 0) | 0 (0 to 0) | -6.5% (-11.4% to -1.8%)   |
| Montenegro | Other unintentional injuries                    | 0 (0 to 1) | 0 (0 to 0) | -15.8% (-21.8% to -9.5%)  |
| Montenegro | Pedestrian road injuries                        | 1 (0 to 1) | 0 (0 to 1) | -13.3% (-20.9% to -5.4%)  |
| Montenegro | Physical violence by firearm                    | 0 (0 to 0) | 0 (0 to 0) | 8.6% (-2.1% to 21.4%)     |
| Montenegro | Physical violence by other means                | 1 (0 to 1) | 0 (0 to 1) | -23% (-28.8% to -16.8%)   |
| Montenegro | Physical violence by sharp object               | 0 (0 to 0) | 0 (0 to 0) | -8.1% (-17% to 2.1%)      |
| Montenegro | Poisoning by carbon monoxide                    | 0 (0 to 0) | 0 (0 to 0) | 19.9% (11.4% to 29.7%)    |
| Montenegro | Poisoning by other means                        | 0 (0 to 0) | 0 (0 to 0) | 2.1% (-4.9% to 9.9%)      |
| Montenegro | Pulmonary aspiration and foreign body in airway | 0 (0 to 0) | 0 (0 to 0) | -17.7% (-26.8% to -9.2%)  |
| Montenegro | Self-harm by firearm                            | 0 (0 to 0) | 0 (0 to 0) | 14.2% (3.2% to 29.4%)     |
| Montenegro | Self-harm by other specified means              | 0 (0 to 1) | 0 (0 to 1) | -1.9% (-7% to 3%)         |
| Montenegro | Unintentional firearm injuries                  | 0 (0 to 0) | 0 (0 to 0) | -2.1% (-10.3% to 6.5%)    |
| Montenegro | Venomous animal contact                         | 0 (0 to 0) | 0 (0 to 0) | -8.5% (-13.8% to -3.4%)   |
| Morocco    | Adverse effects of medical treatment            | 0 (0 to 0) | 0 (0 to 0) | 0% (0% to 0%)             |
| Morocco    | Conflict and terrorism                          | 0 (0 to 0) | 0 (0 to 0) | NA                        |
| Morocco    | Cyclist road injuries                           | 0 (0 to 0) | 0 (0 to 0) | 9% (-1.4% to 19.3%)       |
| Morocco    | Drowning                                        | 0 (0 to 0) | 0 (0 to 0) | 54.4% (34.4% to 75.4%)    |
| Morocco    | Environmental heat and cold exposure            | 0 (0 to 0) | 0 (0 to 0) | -2.7% (-6.9% to 1.4%)     |
| Morocco    | Executions and police conflict                  | 0 (0 to 0) | 0 (0 to 0) | NA                        |
| Morocco    | Exposure to forces of nature                    | 0 (0 to 0) | 0 (0 to 0) | NA                        |
| Morocco    | Falls                                           | 2 (1 to 2) | 2 (2 to 3) | 36.6% (31.5% to 42.2%)    |
| Morocco    | Fire, heat, and hot substances                  | 0 (0 to 0) | 0 (0 to 0) | -24.4% (-29.8% to -18.5%) |
| Morocco    | Foreign body in eyes                            | 0 (0 to 0) | 0 (0 to 0) | 0% (0% to 0%)             |
| Morocco    | Foreign body in other body part                 | 0 (0 to 0) | 0 (0 to 0) | -0.7% (-4.3% to 3.5%)     |
| Morocco    | Motor vehicle road injuries                     | 1 (0 to 1) | 1 (0 to 1) | -9.5% (-16.6% to -1.3%)   |
| Morocco    | Motorcyclist road injuries                      | 0 (0 to 0) | 0 (0 to 0) | -5.9% (-16.8% to 6.2%)    |
| Morocco    | Non-venomous animal contact                     | 0 (0 to 0) | 0 (0 to 0) | -10.9% (-14.6% to -6.6%)  |
| Morocco    | Other exposure to mechanical forces             | 0 (0 to 1) | 0 (0 to 1) | -5.4% (-11.3% to 0.9%)    |
| Morocco    | Other road injuries                             | 0 (0 to 0) | 0 (0 to 0) | 14.1% (3.5% to 26.2%)     |
| Morocco    | Other transport injuries                        | 0 (0 to 0) | 0 (0 to 0) | -5.2% (-9.7% to -0.3%)    |
| Morocco    | Other unintentional injuries                    | 0 (0 to 0) | 0 (0 to 0) | -21% (-25.1% to -17%)     |
| Morocco    | Pedestrian road injuries                        | 0 (0 to 1) | 0 (0 to 0) | -30.2% (-37.4% to -23%)   |
| Morocco    | Physical violence by firearm                    | 0 (0 to 0) | 0 (0 to 0) | 129.8% (98.5% to 173.6%)  |
| Morocco    | Physical violence by other means                | 0 (0 to 0) | 0 (0 to 0) | 1.2% (-7.7% to 9.9%)      |
| Morocco    | Physical violence by sharp object               | 0 (0 to 0) | 0 (0 to 0) | 2.7% (-8.2% to 13.8%)     |
| Morocco    | Poisoning by carbon monoxide                    | 0 (0 to 0) | 0 (0 to 0) | 37.9% (21.1% to 54.8%)    |
| Morocco    | Poisoning by other means                        | 0 (0 to 0) | 0 (0 to 0) | -22.5% (-30% to -14.5%)   |
| Morocco    | Pulmonary aspiration and foreign body in airway | 0 (0 to 0) | 0 (0 to 0) | -20.1% (-29% to -12.3%)   |
| Morocco    | Self-harm by firearm                            | 0 (0 to 0) | 0 (0 to 0) | 33% (19.6% to 49%)        |
| Morocco    | Self-harm by other specified means              | 0 (0 to 0) | 0 (0 to 0) | 2.2% (-2.8% to 7.7%)      |
| Morocco    | Unintentional firearm injuries                  | 0 (0 to 0) | 0 (0 to 0) | -16.4% (-23.6% to -10.1%) |

|            |                                                 |             |            |                           |
|------------|-------------------------------------------------|-------------|------------|---------------------------|
| Morocco    | Venomous animal contact                         | 0 (0 to 0)  | 0 (0 to 0) | -8.5% (-14.4% to -1.8%)   |
| Mozambique | Adverse effects of medical treatment            | 0 (0 to 0)  | 0 (0 to 0) | 0% (0% to 0%)             |
| Mozambique | Conflict and terrorism                          | 5 (1 to 16) | 0 (0 to 0) | NA                        |
| Mozambique | Cyclist road injuries                           | 2 (1 to 3)  | 2 (1 to 4) | 24.7% (15.7% to 34.7%)    |
| Mozambique | Drowning                                        | 0 (0 to 0)  | 0 (0 to 0) | -10.2% (-17% to -3.8%)    |
| Mozambique | Environmental heat and cold exposure            | 0 (0 to 0)  | 0 (0 to 0) | 0.1% (-6% to 7.2%)        |
| Mozambique | Executions and police conflict                  | 0 (0 to 0)  | 0 (0 to 0) | NA                        |
| Mozambique | Exposure to forces of nature                    | 0 (0 to 0)  | 1 (0 to 2) | NA                        |
| Mozambique | Falls                                           | 3 (2 to 5)  | 5 (3 to 7) | 34.1% (29.1% to 39.4%)    |
| Mozambique | Fire, heat, and hot substances                  | 0 (0 to 0)  | 0 (0 to 0) | -4.4% (-9.9% to 0.6%)     |
| Mozambique | Foreign body in eyes                            | 0 (0 to 0)  | 0 (0 to 0) | 0% (0% to 0%)             |
| Mozambique | Foreign body in other body part                 | 1 (0 to 1)  | 1 (0 to 1) | -6% (-9.6% to -1.7%)      |
| Mozambique | Motor vehicle road injuries                     | 1 (0 to 2)  | 1 (1 to 3) | 26.9% (15.1% to 39.4%)    |
| Mozambique | Motorcyclist road injuries                      | 1 (0 to 1)  | 1 (0 to 2) | 24.9% (15.4% to 36.6%)    |
| Mozambique | Non-venomous animal contact                     | 1 (0 to 1)  | 0 (0 to 1) | -16.7% (-21% to -12%)     |
| Mozambique | Other exposure to mechanical forces             | 0 (0 to 0)  | 0 (0 to 0) | -0.5% (-6.3% to 5.4%)     |
| Mozambique | Other road injuries                             | 0 (0 to 0)  | 0 (0 to 0) | 8.9% (0.8% to 18.6%)      |
| Mozambique | Other transport injuries                        | 0 (0 to 1)  | 0 (0 to 1) | -1.2% (-6.3% to 4.7%)     |
| Mozambique | Other unintentional injuries                    | 0 (0 to 0)  | 0 (0 to 0) | -9.7% (-15% to -4.5%)     |
| Mozambique | Pedestrian road injuries                        | 3 (1 to 6)  | 3 (2 to 6) | 13.9% (6.7% to 21.7%)     |
| Mozambique | Physical violence by firearm                    | 0 (0 to 0)  | 0 (0 to 0) | 67.9% (53.1% to 87%)      |
| Mozambique | Physical violence by other means                | 0 (0 to 0)  | 0 (0 to 0) | 48.6% (39.6% to 59%)      |
| Mozambique | Physical violence by sharp object               | 0 (0 to 0)  | 0 (0 to 0) | 42% (30.2% to 54.8%)      |
| Mozambique | Poisoning by carbon monoxide                    | 0 (0 to 0)  | 0 (0 to 0) | 23.9% (9.2% to 39.7%)     |
| Mozambique | Poisoning by other means                        | 0 (0 to 0)  | 0 (0 to 0) | -16.2% (-23.6% to -8%)    |
| Mozambique | Pulmonary aspiration and foreign body in airway | 0 (0 to 0)  | 0 (0 to 0) | -14.8% (-25.6% to -3.2%)  |
| Mozambique | Self-harm by firearm                            | 0 (0 to 0)  | 0 (0 to 0) | 83.9% (62.7% to 117.2%)   |
| Mozambique | Self-harm by other specified means              | 0 (0 to 0)  | 0 (0 to 0) | 49.6% (41.3% to 59.7%)    |
| Mozambique | Unintentional firearm injuries                  | 0 (0 to 0)  | 0 (0 to 0) | -17.4% (-25.6% to -10.1%) |
| Mozambique | Venomous animal contact                         | 0 (0 to 0)  | 0 (0 to 0) | -18.5% (-25.3% to -11.2%) |
| Myanmar    | Adverse effects of medical treatment            | 0 (0 to 0)  | 0 (0 to 0) | 0% (0% to 0%)             |
| Myanmar    | Conflict and terrorism                          | 1 (0 to 2)  | 1 (0 to 2) | NA                        |
| Myanmar    | Cyclist road injuries                           | 0 (0 to 0)  | 0 (0 to 0) | -21.7% (-28.4% to -14.2%) |
| Myanmar    | Drowning                                        | 0 (0 to 0)  | 0 (0 to 0) | -28.7% (-35.4% to -20.8%) |
| Myanmar    | Environmental heat and cold exposure            | 0 (0 to 0)  | 0 (0 to 0) | 4.6% (-0.9% to 9.6%)      |
| Myanmar    | Executions and police conflict                  | 0 (0 to 0)  | 0 (0 to 0) | NA                        |
| Myanmar    | Exposure to forces of nature                    | 0 (0 to 0)  | 0 (0 to 0) | NA                        |
| Myanmar    | Falls                                           | 2 (1 to 3)  | 3 (2 to 4) | 35.4% (30.2% to 40.5%)    |
| Myanmar    | Fire, heat, and hot substances                  | 0 (0 to 0)  | 0 (0 to 0) | -3.7% (-11.2% to 1.9%)    |
| Myanmar    | Foreign body in eyes                            | 0 (0 to 0)  | 0 (0 to 0) | 0% (0% to 0%)             |
| Myanmar    | Foreign body in other body part                 | 0 (0 to 0)  | 0 (0 to 0) | -5.2% (-8.9% to -1.8%)    |
| Myanmar    | Motor vehicle road injuries                     | 0 (0 to 1)  | 0 (0 to 0) | -30% (-36.2% to -23.4%)   |
| Myanmar    | Motorcyclist road injuries                      | 1 (0 to 1)  | 0 (0 to 1) | -19.4% (-26.4% to -11.4%) |

|         |                                                 |            |            |                           |
|---------|-------------------------------------------------|------------|------------|---------------------------|
| Myanmar | Non-venomous animal contact                     | 0 (0 to 0) | 0 (0 to 0) | -44.3% (-47.5% to -41%)   |
| Myanmar | Other exposure to mechanical forces             | 0 (0 to 0) | 0 (0 to 0) | -12.1% (-18.5% to -5.1%)  |
| Myanmar | Other road injuries                             | 0 (0 to 0) | 0 (0 to 0) | -16.2% (-24.6% to -6.8%)  |
| Myanmar | Other transport injuries                        | 0 (0 to 0) | 0 (0 to 0) | -23.5% (-30% to -17.5%)   |
| Myanmar | Other unintentional injuries                    | 0 (0 to 0) | 0 (0 to 0) | -26.4% (-31.5% to -21.2%) |
| Myanmar | Pedestrian road injuries                        | 0 (0 to 0) | 0 (0 to 0) | -45.7% (-50.7% to -40.2%) |
| Myanmar | Physical violence by firearm                    | 0 (0 to 0) | 0 (0 to 0) | -10.7% (-27% to 6.3%)     |
| Myanmar | Physical violence by other means                | 0 (0 to 0) | 0 (0 to 0) | -31.7% (-39.6% to -23.6%) |
| Myanmar | Physical violence by sharp object               | 0 (0 to 0) | 0 (0 to 0) | -45.9% (-53.5% to -38.4%) |
| Myanmar | Poisoning by carbon monoxide                    | 0 (0 to 0) | 0 (0 to 0) | 5.5% (-8.1% to 22.2%)     |
| Myanmar | Poisoning by other means                        | 0 (0 to 0) | 0 (0 to 0) | -40.6% (-46.6% to -35.2%) |
| Myanmar | Pulmonary aspiration and foreign body in airway | 0 (0 to 0) | 0 (0 to 0) | -39.9% (-46.2% to -33.6%) |
| Myanmar | Self-harm by firearm                            | 0 (0 to 0) | 0 (0 to 0) | -2.5% (-19.3% to 15.9%)   |
| Myanmar | Self-harm by other specified means              | 0 (0 to 0) | 0 (0 to 0) | -28.7% (-32.9% to -24.3%) |
| Myanmar | Unintentional firearm injuries                  | 0 (0 to 0) | 0 (0 to 0) | -27.6% (-36.3% to -20.7%) |
| Myanmar | Venomous animal contact                         | 0 (0 to 0) | 0 (0 to 0) | -57.9% (-62.7% to -53.1%) |
| Namibia | Adverse effects of medical treatment            | 0 (0 to 0) | 0 (0 to 0) | 0% (0% to 0%)             |
| Namibia | Conflict and terrorism                          | 0 (0 to 0) | 0 (0 to 0) | NA                        |
| Namibia | Cyclist road injuries                           | 0 (0 to 1) | 1 (0 to 1) | 40.5% (30.6% to 53.3%)    |
| Namibia | Drowning                                        | 0 (0 to 0) | 0 (0 to 0) | 14.9% (3.5% to 27.6%)     |
| Namibia | Environmental heat and cold exposure            | 0 (0 to 0) | 0 (0 to 0) | -14.2% (-19.2% to -9.3%)  |
| Namibia | Executions and police conflict                  | 0 (0 to 0) | 0 (0 to 0) | NA                        |
| Namibia | Exposure to forces of nature                    | 0 (0 to 0) | 0 (0 to 0) | NA                        |
| Namibia | Falls                                           | 2 (2 to 3) | 3 (2 to 4) | 27.5% (23.2% to 31.9%)    |
| Namibia | Fire, heat, and hot substances                  | 0 (0 to 0) | 0 (0 to 0) | -15.9% (-21.1% to -10.3%) |
| Namibia | Foreign body in eyes                            | 0 (0 to 0) | 0 (0 to 0) | 0% (0% to 0%)             |
| Namibia | Foreign body in other body part                 | 1 (1 to 1) | 1 (0 to 1) | -3.2% (-6.7% to 0.9%)     |
| Namibia | Motor vehicle road injuries                     | 1 (1 to 3) | 1 (1 to 3) | 7.1% (-1% to 16.4%)       |
| Namibia | Motorcyclist road injuries                      | 0 (0 to 1) | 0 (0 to 1) | 22% (10.1% to 35%)        |
| Namibia | Non-venomous animal contact                     | 0 (0 to 0) | 0 (0 to 0) | -22.4% (-26.8% to -18%)   |
| Namibia | Other exposure to mechanical forces             | 0 (0 to 1) | 0 (0 to 0) | -19.5% (-24.1% to -14.2%) |
| Namibia | Other road injuries                             | 0 (0 to 0) | 0 (0 to 0) | 34% (20.9% to 49.7%)      |
| Namibia | Other transport injuries                        | 0 (0 to 1) | 0 (0 to 1) | -6% (-11% to -1.2%)       |
| Namibia | Other unintentional injuries                    | 0 (0 to 0) | 0 (0 to 0) | -16.4% (-21.1% to -11.7%) |
| Namibia | Pedestrian road injuries                        | 2 (1 to 3) | 2 (1 to 3) | -2.5% (-9.2% to 4.3%)     |
| Namibia | Physical violence by firearm                    | 0 (0 to 0) | 0 (0 to 0) | 10.9% (-4.8% to 30.5%)    |
| Namibia | Physical violence by other means                | 0 (0 to 1) | 0 (0 to 1) | 0.1% (-6.6% to 7.1%)      |
| Namibia | Physical violence by sharp object               | 0 (0 to 0) | 0 (0 to 0) | 4.1% (-4.6% to 14.2%)     |
| Namibia | Poisoning by carbon monoxide                    | 0 (0 to 0) | 0 (0 to 0) | 25.3% (11.4% to 40.2%)    |
| Namibia | Poisoning by other means                        | 0 (0 to 0) | 0 (0 to 0) | -12.1% (-20.3% to -4.6%)  |
| Namibia | Pulmonary aspiration and foreign body in airway | 0 (0 to 0) | 0 (0 to 0) | -5.8% (-12.8% to 1.7%)    |
| Namibia | Self-harm by firearm                            | 0 (0 to 0) | 0 (0 to 0) | 63.2% (42.8% to 91.4%)    |
| Namibia | Self-harm by other specified means              | 0 (0 to 0) | 0 (0 to 0) | 25.4% (17.7% to 34%)      |

|         |                                                 |            |            |                           |
|---------|-------------------------------------------------|------------|------------|---------------------------|
| Namibia | Unintentional firearm injuries                  | 0 (0 to 0) | 0 (0 to 0) | -17.3% (-25.7% to -7.8%)  |
| Namibia | Venomous animal contact                         | 0 (0 to 0) | 0 (0 to 0) | -26.2% (-33.9% to -17.3%) |
| Nauru   | Adverse effects of medical treatment            | 0 (0 to 0) | 0 (0 to 0) | 0% (0% to 0%)             |
| Nauru   | Conflict and terrorism                          | 0 (0 to 0) | 0 (0 to 0) | NA                        |
| Nauru   | Cyclist road injuries                           | 0 (0 to 1) | 0 (0 to 1) | 2.3% (-3.7% to 9.8%)      |
| Nauru   | Drowning                                        | 0 (0 to 0) | 0 (0 to 0) | 35.7% (24.4% to 46.8%)    |
| Nauru   | Environmental heat and cold exposure            | 0 (0 to 0) | 0 (0 to 0) | -3.9% (-8.4% to 0.1%)     |
| Nauru   | Executions and police conflict                  | 0 (0 to 0) | 0 (0 to 0) | NA                        |
| Nauru   | Exposure to forces of nature                    | 0 (0 to 0) | 0 (0 to 0) | NA                        |
| Nauru   | Falls                                           | 3 (2 to 5) | 5 (3 to 7) | 46.7% (41.7% to 51.7%)    |
| Nauru   | Fire, heat, and hot substances                  | 0 (0 to 0) | 0 (0 to 0) | -2.9% (-7.3% to 1.9%)     |
| Nauru   | Foreign body in eyes                            | 0 (0 to 0) | 0 (0 to 0) | 0% (0% to 0%)             |
| Nauru   | Foreign body in other body part                 | 0 (0 to 0) | 0 (0 to 0) | -3% (-6.4% to 1.2%)       |
| Nauru   | Motor vehicle road injuries                     | 1 (1 to 2) | 1 (1 to 2) | -11.1% (-17.1% to -5.5%)  |
| Nauru   | Motorcyclist road injuries                      | 1 (0 to 2) | 1 (0 to 2) | -2.4% (-9.4% to 5.8%)     |
| Nauru   | Non-venomous animal contact                     | 0 (0 to 0) | 0 (0 to 0) | 3.4% (-0.8% to 7.8%)      |
| Nauru   | Other exposure to mechanical forces             | 0 (0 to 0) | 0 (0 to 0) | -15.6% (-20.1% to -11%)   |
| Nauru   | Other road injuries                             | 0 (0 to 0) | 0 (0 to 0) | -2.9% (-10.5% to 5.8%)    |
| Nauru   | Other transport injuries                        | 0 (0 to 1) | 0 (0 to 1) | -4.6% (-8.3% to -0.8%)    |
| Nauru   | Other unintentional injuries                    | 0 (0 to 0) | 0 (0 to 0) | 2.2% (-2% to 7%)          |
| Nauru   | Pedestrian road injuries                        | 1 (0 to 1) | 1 (0 to 1) | 0.8% (-6.5% to 9%)        |
| Nauru   | Physical violence by firearm                    | 0 (0 to 0) | 0 (0 to 0) | 0.3% (-11.5% to 11.5%)    |
| Nauru   | Physical violence by other means                | 1 (0 to 1) | 1 (0 to 1) | -1.5% (-7.1% to 4.1%)     |
| Nauru   | Physical violence by sharp object               | 0 (0 to 0) | 0 (0 to 0) | -15.2% (-23.7% to -6.5%)  |
| Nauru   | Poisoning by carbon monoxide                    | 0 (0 to 0) | 0 (0 to 0) | 9.3% (-0.5% to 19.2%)     |
| Nauru   | Poisoning by other means                        | 0 (0 to 0) | 0 (0 to 0) | -16.3% (-22.9% to -9.6%)  |
| Nauru   | Pulmonary aspiration and foreign body in airway | 0 (0 to 0) | 0 (0 to 0) | 7.5% (-2.7% to 17.6%)     |
| Nauru   | Self-harm by firearm                            | 0 (0 to 0) | 0 (0 to 0) | -5.1% (-19.8% to 8.4%)    |
| Nauru   | Self-harm by other specified means              | 0 (0 to 0) | 0 (0 to 0) | 0.2% (-5.6% to 7%)        |
| Nauru   | Unintentional firearm injuries                  | 0 (0 to 0) | 0 (0 to 0) | -15.4% (-23.2% to -9%)    |
| Nauru   | Venomous animal contact                         | 0 (0 to 0) | 0 (0 to 0) | 5% (-2.2% to 12.9%)       |
| Nepal   | Adverse effects of medical treatment            | 0 (0 to 0) | 0 (0 to 0) | 0% (0% to 0%)             |
| Nepal   | Conflict and terrorism                          | 0 (0 to 0) | 0 (0 to 0) | NA                        |
| Nepal   | Cyclist road injuries                           | 1 (0 to 1) | 1 (0 to 1) | -2.2% (-9.5% to 4.7%)     |
| Nepal   | Drowning                                        | 0 (0 to 0) | 0 (0 to 0) | -4.6% (-14.4% to 6.5%)    |
| Nepal   | Environmental heat and cold exposure            | 0 (0 to 0) | 0 (0 to 0) | -13.2% (-18.8% to -7.9%)  |
| Nepal   | Executions and police conflict                  | 0 (0 to 0) | 0 (0 to 0) | NA                        |
| Nepal   | Exposure to forces of nature                    | 0 (0 to 0) | 0 (0 to 0) | NA                        |
| Nepal   | Falls                                           | 3 (2 to 4) | 3 (3 to 5) | 24.2% (19.7% to 28.5%)    |
| Nepal   | Fire, heat, and hot substances                  | 0 (0 to 0) | 0 (0 to 0) | 11.5% (4.5% to 19.6%)     |
| Nepal   | Foreign body in eyes                            | 0 (0 to 0) | 0 (0 to 0) | 0% (0% to 0%)             |
| Nepal   | Foreign body in other body part                 | 0 (0 to 0) | 0 (0 to 0) | -6.5% (-9.9% to -2.9%)    |
| Nepal   | Motor vehicle road injuries                     | 0 (0 to 1) | 0 (0 to 1) | 15.6% (6.1% to 25.2%)     |

|             |                                                 |            |            |                           |
|-------------|-------------------------------------------------|------------|------------|---------------------------|
| Nepal       | Motorcyclist road injuries                      | 0 (0 to 1) | 0 (0 to 1) | 18% (7.6% to 28.8%)       |
| Nepal       | Non-venomous animal contact                     | 0 (0 to 1) | 0 (0 to 1) | -15.4% (-20.4% to -10.6%) |
| Nepal       | Other exposure to mechanical forces             | 0 (0 to 0) | 0 (0 to 0) | 4.3% (-2.2% to 10.7%)     |
| Nepal       | Other road injuries                             | 0 (0 to 0) | 0 (0 to 0) | 2.8% (-5.2% to 11.5%)     |
| Nepal       | Other transport injuries                        | 0 (0 to 0) | 0 (0 to 0) | 0.1% (-4.8% to 5.1%)      |
| Nepal       | Other unintentional injuries                    | 0 (0 to 0) | 0 (0 to 0) | -18.4% (-22.5% to -14%)   |
| Nepal       | Pedestrian road injuries                        | 0 (0 to 0) | 0 (0 to 0) | -2.2% (-10.4% to 5.8%)    |
| Nepal       | Physical violence by firearm                    | 0 (0 to 0) | 0 (0 to 0) | 58.5% (35.8% to 86.8%)    |
| Nepal       | Physical violence by other means                | 0 (0 to 1) | 0 (0 to 1) | 21.4% (14.6% to 28.3%)    |
| Nepal       | Physical violence by sharp object               | 0 (0 to 0) | 0 (0 to 0) | 8.5% (-0.8% to 18.4%)     |
| Nepal       | Poisoning by carbon monoxide                    | 0 (0 to 0) | 0 (0 to 0) | -5.7% (-17.8% to 6.9%)    |
| Nepal       | Poisoning by other means                        | 0 (0 to 0) | 0 (0 to 0) | -31.2% (-38.3% to -23.2%) |
| Nepal       | Pulmonary aspiration and foreign body in airway | 0 (0 to 0) | 0 (0 to 0) | -24.5% (-31.1% to -17.6%) |
| Nepal       | Self-harm by firearm                            | 0 (0 to 0) | 0 (0 to 0) | 25.9% (9.2% to 44%)       |
| Nepal       | Self-harm by other specified means              | 0 (0 to 0) | 0 (0 to 0) | 2.7% (-3.7% to 9.1%)      |
| Nepal       | Unintentional firearm injuries                  | 0 (0 to 0) | 0 (0 to 0) | -8.8% (-16.2% to -2.3%)   |
| Nepal       | Venomous animal contact                         | 0 (0 to 0) | 0 (0 to 0) | -7.5% (-17.9% to 1.5%)    |
| Netherlands | Adverse effects of medical treatment            | 0 (0 to 0) | 0 (0 to 0) | 0% (0% to 0%)             |
| Netherlands | Conflict and terrorism                          | 0 (0 to 0) | 0 (0 to 0) | NA                        |
| Netherlands | Cyclist road injuries                           | 0 (0 to 1) | 0 (0 to 0) | -45.8% (-53.8% to -37.3%) |
| Netherlands | Drowning                                        | 0 (0 to 0) | 0 (0 to 0) | 58% (43% to 75.8%)        |
| Netherlands | Environmental heat and cold exposure            | 0 (0 to 0) | 0 (0 to 0) | -5.2% (-10.1% to -0.3%)   |
| Netherlands | Executions and police conflict                  | 0 (0 to 0) | 0 (0 to 0) | NA                        |
| Netherlands | Exposure to forces of nature                    | 0 (0 to 0) | 0 (0 to 0) | NA                        |
| Netherlands | Falls                                           | 5 (3 to 6) | 7 (5 to 9) | 45.5% (38.9% to 53.2%)    |
| Netherlands | Fire, heat, and hot substances                  | 0 (0 to 0) | 0 (0 to 0) | -2.4% (-7.1% to 2.3%)     |
| Netherlands | Foreign body in eyes                            | 0 (0 to 0) | 0 (0 to 0) | 0% (0% to 0%)             |
| Netherlands | Foreign body in other body part                 | 0 (0 to 0) | 0 (0 to 0) | 1.1% (-2.1% to 5.9%)      |
| Netherlands | Motor vehicle road injuries                     | 0 (0 to 1) | 0 (0 to 0) | -33.8% (-43.6% to -22.8%) |
| Netherlands | Motorcyclist road injuries                      | 0 (0 to 0) | 0 (0 to 0) | -34.6% (-47.1% to -19.8%) |
| Netherlands | Non-venomous animal contact                     | 0 (0 to 0) | 0 (0 to 0) | -11.4% (-14.7% to -7.1%)  |
| Netherlands | Other exposure to mechanical forces             | 0 (0 to 1) | 0 (0 to 1) | -2.5% (-8.5% to 2.9%)     |
| Netherlands | Other road injuries                             | 0 (0 to 0) | 0 (0 to 0) | -6% (-19.5% to 10.4%)     |
| Netherlands | Other transport injuries                        | 0 (0 to 0) | 0 (0 to 0) | 5.8% (1.3% to 10.3%)      |
| Netherlands | Other unintentional injuries                    | 0 (0 to 0) | 0 (0 to 0) | -5% (-9.7% to -0.2%)      |
| Netherlands | Pedestrian road injuries                        | 0 (0 to 0) | 0 (0 to 0) | -5.8% (-20.3% to 11.7%)   |
| Netherlands | Physical violence by firearm                    | 0 (0 to 0) | 0 (0 to 0) | 12.4% (2.5% to 24.8%)     |
| Netherlands | Physical violence by other means                | 0 (0 to 0) | 0 (0 to 0) | -12.2% (-20% to -4.3%)    |
| Netherlands | Physical violence by sharp object               | 0 (0 to 0) | 0 (0 to 0) | -27.6% (-36.9% to -19.6%) |
| Netherlands | Poisoning by carbon monoxide                    | 0 (0 to 0) | 0 (0 to 0) | 12.2% (3.7% to 21%)       |
| Netherlands | Poisoning by other means                        | 0 (0 to 0) | 0 (0 to 0) | -5.1% (-11.1% to 1.6%)    |
| Netherlands | Pulmonary aspiration and foreign body in airway | 0 (0 to 0) | 0 (0 to 0) | -8.3% (-15.6% to -2.3%)   |
| Netherlands | Self-harm by firearm                            | 0 (0 to 0) | 0 (0 to 0) | 13.1% (0.8% to 29.1%)     |

|             |                                                 |             |             |                           |
|-------------|-------------------------------------------------|-------------|-------------|---------------------------|
| Netherlands | Self-harm by other specified means              | 0 (0 to 1)  | 0 (0 to 1)  | -9.4% (-13.3% to -4.4%)   |
| Netherlands | Unintentional firearm injuries                  | 0 (0 to 0)  | 0 (0 to 0)  | 5.1% (-2.7% to 13.5%)     |
| Netherlands | Venomous animal contact                         | 0 (0 to 0)  | 0 (0 to 0)  | -10.9% (-16.7% to -4.9%)  |
| New Zealand | Adverse effects of medical treatment            | 0 (0 to 0)  | 0 (0 to 0)  | 0% (0% to 0%)             |
| New Zealand | Conflict and terrorism                          | 0 (0 to 0)  | 0 (0 to 0)  | NA                        |
| New Zealand | Cyclist road injuries                           | 0 (0 to 0)  | 0 (0 to 0)  | -21.5% (-32.1% to -9.6%)  |
| New Zealand | Drowning                                        | 0 (0 to 0)  | 0 (0 to 0)  | -33.5% (-39.1% to -27.7%) |
| New Zealand | Environmental heat and cold exposure            | 0 (0 to 0)  | 0 (0 to 0)  | -35.9% (-43.3% to -27.5%) |
| New Zealand | Executions and police conflict                  | 0 (0 to 0)  | 0 (0 to 0)  | NA                        |
| New Zealand | Exposure to forces of nature                    | 0 (0 to 0)  | 0 (0 to 0)  | NA                        |
| New Zealand | Falls                                           | 7 (5 to 10) | 9 (6 to 12) | 19.9% (13.3% to 28%)      |
| New Zealand | Fire, heat, and hot substances                  | 0 (0 to 0)  | 0 (0 to 0)  | -12% (-17.3% to -4.7%)    |
| New Zealand | Foreign body in eyes                            | 0 (0 to 0)  | 0 (0 to 0)  | 0% (0% to 0%)             |
| New Zealand | Foreign body in other body part                 | 1 (1 to 1)  | 1 (1 to 1)  | -4.8% (-11.1% to 2.8%)    |
| New Zealand | Motor vehicle road injuries                     | 1 (0 to 2)  | 1 (0 to 1)  | -11.5% (-21.3% to 1.1%)   |
| New Zealand | Motorcyclist road injuries                      | 0 (0 to 0)  | 0 (0 to 0)  | -27.7% (-40.6% to -13%)   |
| New Zealand | Non-venomous animal contact                     | 0 (0 to 1)  | 0 (0 to 1)  | -14% (-25.8% to -0.5%)    |
| New Zealand | Other exposure to mechanical forces             | 2 (1 to 5)  | 2 (1 to 4)  | -8.7% (-14.9% to -0.9%)   |
| New Zealand | Other road injuries                             | 0 (0 to 0)  | 0 (0 to 0)  | -34.3% (-43.1% to -23.2%) |
| New Zealand | Other transport injuries                        | 0 (0 to 0)  | 0 (0 to 0)  | -16.7% (-28% to -5.2%)    |
| New Zealand | Other unintentional injuries                    | 1 (1 to 1)  | 1 (1 to 1)  | -3% (-9.9% to 4.7%)       |
| New Zealand | Pedestrian road injuries                        | 0 (0 to 0)  | 0 (0 to 0)  | -17.3% (-28.5% to -4.4%)  |
| New Zealand | Physical violence by firearm                    | 0 (0 to 0)  | 0 (0 to 0)  | -15.5% (-25.2% to -3.6%)  |
| New Zealand | Physical violence by other means                | 1 (0 to 1)  | 1 (0 to 1)  | 8.6% (-1.5% to 22.3%)     |
| New Zealand | Physical violence by sharp object               | 0 (0 to 0)  | 0 (0 to 0)  | -31.8% (-40.8% to -21.3%) |
| New Zealand | Poisoning by carbon monoxide                    | 0 (0 to 0)  | 0 (0 to 0)  | -5.7% (-20.7% to 14.3%)   |
| New Zealand | Poisoning by other means                        | 0 (0 to 0)  | 0 (0 to 0)  | -19.3% (-26.8% to -9.7%)  |
| New Zealand | Pulmonary aspiration and foreign body in airway | 0 (0 to 0)  | 0 (0 to 0)  | 16.3% (4.2% to 31.3%)     |
| New Zealand | Self-harm by firearm                            | 0 (0 to 0)  | 0 (0 to 0)  | -73.2% (-79.3% to -66.7%) |
| New Zealand | Self-harm by other specified means              | 0 (0 to 1)  | 0 (0 to 1)  | -23.7% (-29.8% to -18.3%) |
| New Zealand | Unintentional firearm injuries                  | 0 (0 to 0)  | 0 (0 to 0)  | -40.1% (-52.1% to -23%)   |
| New Zealand | Venomous animal contact                         | 0 (0 to 0)  | 0 (0 to 0)  | -22.1% (-37.8% to -1.6%)  |
| Nicaragua   | Adverse effects of medical treatment            | 0 (0 to 0)  | 0 (0 to 0)  | 0% (0% to 0%)             |
| Nicaragua   | Conflict and terrorism                          | 1 (0 to 3)  | 0 (0 to 0)  | NA                        |
| Nicaragua   | Cyclist road injuries                           | 0 (0 to 0)  | 0 (0 to 0)  | -13.6% (-22.2% to -2.6%)  |
| Nicaragua   | Drowning                                        | 0 (0 to 0)  | 0 (0 to 0)  | 37.5% (18.9% to 59.4%)    |
| Nicaragua   | Environmental heat and cold exposure            | 0 (0 to 0)  | 0 (0 to 0)  | 3.2% (-0.8% to 7.9%)      |
| Nicaragua   | Executions and police conflict                  | 0 (0 to 0)  | 0 (0 to 0)  | NA                        |
| Nicaragua   | Exposure to forces of nature                    | 0 (0 to 0)  | 0 (0 to 0)  | NA                        |
| Nicaragua   | Falls                                           | 2 (1 to 2)  | 2 (1 to 3)  | 27.8% (22.7% to 32.7%)    |
| Nicaragua   | Fire, heat, and hot substances                  | 0 (0 to 0)  | 0 (0 to 0)  | -3.3% (-10% to 4.3%)      |
| Nicaragua   | Foreign body in eyes                            | 0 (0 to 0)  | 0 (0 to 0)  | 0% (0% to 0%)             |
| Nicaragua   | Foreign body in other body part                 | 0 (0 to 0)  | 0 (0 to 0)  | -1.4% (-5.5% to 2.4%)     |



|           |                                                 |            |            |                           |
|-----------|-------------------------------------------------|------------|------------|---------------------------|
| Nicaragua | Motor vehicle road injuries                     | 1 (0 to 1) | 0 (0 to 1) | -15.4% (-22.7% to -7.3%)  |
| Nicaragua | Motorcyclist road injuries                      | 0 (0 to 0) | 0 (0 to 0) | 56% (39.2% to 76.3%)      |
| Nicaragua | Non-venomous animal contact                     | 0 (0 to 0) | 0 (0 to 0) | -10% (-14.4% to -5.5%)    |
| Nicaragua | Other exposure to mechanical forces             | 0 (0 to 1) | 0 (0 to 1) | -6.1% (-15% to 3.3%)      |
| Nicaragua | Other road injuries                             | 0 (0 to 0) | 0 (0 to 0) | -16.1% (-25.4% to -6.3%)  |
| Nicaragua | Other transport injuries                        | 0 (0 to 0) | 0 (0 to 0) | 1.9% (-2.6% to 6.3%)      |
| Nicaragua | Other unintentional injuries                    | 0 (0 to 0) | 0 (0 to 0) | -27.5% (-33.4% to -21.3%) |
| Nicaragua | Pedestrian road injuries                        | 0 (0 to 1) | 0 (0 to 0) | -40.5% (-47.2% to -33.4%) |
| Nicaragua | Physical violence by firearm                    | 0 (0 to 0) | 0 (0 to 0) | 42.7% (23.9% to 68.7%)    |
| Nicaragua | Physical violence by other means                | 0 (0 to 0) | 0 (0 to 0) | -20.5% (-29.6% to -10.7%) |
| Nicaragua | Physical violence by sharp object               | 0 (0 to 0) | 0 (0 to 0) | -23.8% (-32.8% to -14.7%) |
| Nicaragua | Poisoning by carbon monoxide                    | 0 (0 to 0) | 0 (0 to 0) | 36.3% (21.1% to 53%)      |
| Nicaragua | Poisoning by other means                        | 0 (0 to 0) | 0 (0 to 0) | -9.2% (-17% to -0.6%)     |
| Nicaragua | Pulmonary aspiration and foreign body in airway | 0 (0 to 0) | 0 (0 to 0) | -33.3% (-41.7% to -25.2%) |
| Nicaragua | Self-harm by firearm                            | 0 (0 to 0) | 0 (0 to 0) | 10.5% (-2.2% to 26%)      |
| Nicaragua | Self-harm by other specified means              | 0 (0 to 0) | 0 (0 to 0) | 1.2% (-5.5% to 8.8%)      |
| Nicaragua | Unintentional firearm injuries                  | 0 (0 to 0) | 0 (0 to 0) | -25.7% (-36.1% to -17.3%) |
| Nicaragua | Venomous animal contact                         | 0 (0 to 0) | 0 (0 to 0) | -8.3% (-13% to -2.8%)     |
| Niger     | Adverse effects of medical treatment            | 0 (0 to 0) | 0 (0 to 0) | 0% (0% to 0%)             |
| Niger     | Conflict and terrorism                          | 1 (0 to 2) | 1 (0 to 2) | NA                        |
| Niger     | Cyclist road injuries                           | 1 (0 to 2) | 1 (1 to 2) | 14.3% (7.4% to 21.8%)     |
| Niger     | Drowning                                        | 0 (0 to 0) | 0 (0 to 0) | -11.4% (-18.2% to -4.1%)  |
| Niger     | Environmental heat and cold exposure            | 0 (0 to 0) | 0 (0 to 0) | -3.8% (-9.2% to 1.7%)     |
| Niger     | Executions and police conflict                  | 0 (0 to 0) | 0 (0 to 0) | NA                        |
| Niger     | Exposure to forces of nature                    | 0 (0 to 0) | 0 (0 to 0) | NA                        |
| Niger     | Falls                                           | 3 (2 to 4) | 3 (2 to 5) | 17.3% (13% to 22%)        |
| Niger     | Fire, heat, and hot substances                  | 0 (0 to 0) | 0 (0 to 0) | -11.2% (-17.2% to -5.8%)  |
| Niger     | Foreign body in eyes                            | 0 (0 to 0) | 0 (0 to 0) | 0% (0% to 0%)             |
| Niger     | Foreign body in other body part                 | 1 (0 to 1) | 1 (0 to 1) | 0% (-3.6% to 3.4%)        |
| Niger     | Motor vehicle road injuries                     | 1 (1 to 3) | 1 (1 to 3) | 6.4% (-1% to 14.3%)       |
| Niger     | Motorcyclist road injuries                      | 1 (0 to 1) | 1 (0 to 1) | -8.8% (-15.5% to -0.9%)   |
| Niger     | Non-venomous animal contact                     | 0 (0 to 1) | 0 (0 to 0) | -8% (-12.3% to -4.3%)     |
| Niger     | Other exposure to mechanical forces             | 0 (0 to 0) | 0 (0 to 0) | -10.7% (-15.3% to -5.7%)  |
| Niger     | Other road injuries                             | 0 (0 to 0) | 0 (0 to 0) | 12.4% (3% to 22.3%)       |
| Niger     | Other transport injuries                        | 0 (0 to 1) | 0 (0 to 1) | -11.3% (-15.9% to -7.3%)  |
| Niger     | Other unintentional injuries                    | 0 (0 to 0) | 0 (0 to 0) | -13% (-17% to -9%)        |
| Niger     | Pedestrian road injuries                        | 2 (1 to 3) | 2 (1 to 3) | -1.6% (-8.4% to 5.6%)     |
| Niger     | Physical violence by firearm                    | 0 (0 to 0) | 0 (0 to 0) | 9.7% (-1.3% to 24.8%)     |
| Niger     | Physical violence by other means                | 0 (0 to 0) | 0 (0 to 0) | -5.1% (-10.2% to 0.2%)    |
| Niger     | Physical violence by sharp object               | 0 (0 to 0) | 0 (0 to 0) | -6.3% (-12.7% to 0.4%)    |
| Niger     | Poisoning by carbon monoxide                    | 0 (0 to 0) | 0 (0 to 0) | 16.6% (2.7% to 31.1%)     |
| Niger     | Poisoning by other means                        | 0 (0 to 0) | 0 (0 to 0) | -22.4% (-29.7% to -14.2%) |
| Niger     | Pulmonary aspiration and foreign body in airway | 0 (0 to 0) | 0 (0 to 0) | -11.5% (-20.3% to -2%)    |

|         |                                                 |            |            |                           |
|---------|-------------------------------------------------|------------|------------|---------------------------|
| Niger   | Self-harm by firearm                            | 0 (0 to 0) | 0 (0 to 0) | 20.3% (7.8% to 33.6%)     |
| Niger   | Self-harm by other specified means              | 0 (0 to 0) | 0 (0 to 0) | 9.7% (4.9% to 14.5%)      |
| Niger   | Unintentional firearm injuries                  | 0 (0 to 0) | 0 (0 to 0) | -15.7% (-23% to -9%)      |
| Niger   | Venomous animal contact                         | 0 (0 to 0) | 0 (0 to 0) | -5.5% (-11.8% to 1.5%)    |
| Nigeria | Adverse effects of medical treatment            | 0 (0 to 0) | 0 (0 to 0) | 0% (0% to 0%)             |
| Nigeria | Conflict and terrorism                          | 0 (0 to 0) | 0 (0 to 1) | NA                        |
| Nigeria | Cyclist road injuries                           | 1 (0 to 2) | 1 (1 to 2) | 17% (14.1% to 20.1%)      |
| Nigeria | Drowning                                        | 0 (0 to 0) | 0 (0 to 0) | -11.6% (-16.7% to -6.6%)  |
| Nigeria | Environmental heat and cold exposure            | 0 (0 to 0) | 0 (0 to 0) | -4.2% (-7.1% to -1.4%)    |
| Nigeria | Executions and police conflict                  | 0 (0 to 0) | 0 (0 to 0) | NA                        |
| Nigeria | Exposure to forces of nature                    | 0 (0 to 0) | 0 (0 to 0) | NA                        |
| Nigeria | Falls                                           | 3 (2 to 5) | 3 (2 to 5) | 4% (3% to 5.1%)           |
| Nigeria | Fire, heat, and hot substances                  | 0 (0 to 0) | 0 (0 to 0) | -12.7% (-15.5% to -10.4%) |
| Nigeria | Foreign body in eyes                            | 0 (0 to 0) | 0 (0 to 0) | 0% (0% to 0%)             |
| Nigeria | Foreign body in other body part                 | 1 (1 to 1) | 1 (1 to 1) | -1.5% (-2.4% to -0.5%)    |
| Nigeria | Motor vehicle road injuries                     | 1 (1 to 2) | 1 (1 to 3) | 13.9% (11.3% to 17.1%)    |
| Nigeria | Motorcyclist road injuries                      | 1 (0 to 1) | 1 (0 to 1) | 9.5% (6.5% to 12.5%)      |
| Nigeria | Non-venomous animal contact                     | 0 (0 to 0) | 0 (0 to 0) | -21.8% (-24.7% to -18.9%) |
| Nigeria | Other exposure to mechanical forces             | 0 (0 to 0) | 0 (0 to 0) | -17.8% (-20.3% to -15.1%) |
| Nigeria | Other road injuries                             | 0 (0 to 0) | 0 (0 to 0) | 15% (11.8% to 18.3%)      |
| Nigeria | Other transport injuries                        | 0 (0 to 0) | 0 (0 to 0) | -5.2% (-7.2% to -3.4%)    |
| Nigeria | Other unintentional injuries                    | 0 (0 to 0) | 0 (0 to 0) | -17.7% (-21.2% to -14.1%) |
| Nigeria | Pedestrian road injuries                        | 1 (1 to 3) | 2 (1 to 3) | 8.2% (5.6% to 10.5%)      |
| Nigeria | Physical violence by firearm                    | 0 (0 to 0) | 0 (0 to 0) | 5.5% (0.5% to 10%)        |
| Nigeria | Physical violence by other means                | 0 (0 to 0) | 0 (0 to 0) | -0.8% (-3.1% to 1.4%)     |
| Nigeria | Physical violence by sharp object               | 0 (0 to 0) | 0 (0 to 0) | -4.7% (-7.3% to -2.5%)    |
| Nigeria | Poisoning by carbon monoxide                    | 0 (0 to 0) | 0 (0 to 0) | -8.7% (-12.5% to -4.8%)   |
| Nigeria | Poisoning by other means                        | 0 (0 to 0) | 0 (0 to 0) | -23.1% (-26.3% to -19.6%) |
| Nigeria | Pulmonary aspiration and foreign body in airway | 0 (0 to 0) | 0 (0 to 0) | -13.1% (-15.8% to -10.5%) |
| Nigeria | Self-harm by firearm                            | 0 (0 to 0) | 0 (0 to 0) | 8.7% (5.5% to 12%)        |
| Nigeria | Self-harm by other specified means              | 0 (0 to 0) | 0 (0 to 0) | -1% (-3.4% to 1%)         |
| Nigeria | Unintentional firearm injuries                  | 0 (0 to 0) | 0 (0 to 0) | -27.7% (-33.2% to -23.3%) |
| Nigeria | Venomous animal contact                         | 0 (0 to 0) | 0 (0 to 0) | -21.9% (-26.2% to -17.6%) |
| Niue    | Adverse effects of medical treatment            | 0 (0 to 0) | 0 (0 to 0) | 0% (0% to 0%)             |
| Niue    | Conflict and terrorism                          | 0 (0 to 0) | 0 (0 to 0) | NA                        |
| Niue    | Cyclist road injuries                           | 0 (0 to 1) | 0 (0 to 1) | 3.1% (-3.7% to 10.8%)     |
| Niue    | Drowning                                        | 0 (0 to 0) | 0 (0 to 0) | 54.8% (40.3% to 68%)      |
| Niue    | Environmental heat and cold exposure            | 0 (0 to 0) | 0 (0 to 0) | 0.4% (-4.3% to 5.3%)      |
| Niue    | Executions and police conflict                  | 0 (0 to 0) | 0 (0 to 0) | NA                        |
| Niue    | Exposure to forces of nature                    | 0 (0 to 0) | 0 (0 to 0) | NA                        |
| Niue    | Falls                                           | 4 (2 to 5) | 6 (4 to 8) | 57.2% (51.2% to 63.5%)    |
| Niue    | Fire, heat, and hot substances                  | 0 (0 to 0) | 0 (0 to 0) | 5.1% (0.7% to 9.6%)       |
| Niue    | Foreign body in eyes                            | 0 (0 to 0) | 0 (0 to 0) | 0% (0% to 0%)             |

|                 |                                                 |            |            |                           |
|-----------------|-------------------------------------------------|------------|------------|---------------------------|
| Niue            | Foreign body in other body part                 | 0 (0 to 0) | 0 (0 to 0) | -1.2% (-4.5% to 2.6%)     |
| Niue            | Motor vehicle road injuries                     | 1 (0 to 2) | 1 (0 to 2) | -14.2% (-20.9% to -7.8%)  |
| Niue            | Motorcyclist road injuries                      | 1 (0 to 1) | 1 (0 to 1) | -4.2% (-11.6% to 3.6%)    |
| Niue            | Non-venomous animal contact                     | 0 (0 to 0) | 0 (0 to 0) | -15% (-18.5% to -11.6%)   |
| Niue            | Other exposure to mechanical forces             | 0 (0 to 0) | 0 (0 to 0) | -11.1% (-15.9% to -6.3%)  |
| Niue            | Other road injuries                             | 0 (0 to 0) | 0 (0 to 0) | 1.9% (-7% to 11%)         |
| Niue            | Other transport injuries                        | 0 (0 to 1) | 0 (0 to 0) | -7% (-11.4% to -2.4%)     |
| Niue            | Other unintentional injuries                    | 0 (0 to 0) | 0 (0 to 0) | -3.7% (-8.3% to 0.5%)     |
| Niue            | Pedestrian road injuries                        | 1 (0 to 1) | 1 (0 to 1) | -9.8% (-17.1% to -2.8%)   |
| Niue            | Physical violence by firearm                    | 0 (0 to 0) | 0 (0 to 0) | 6% (-6.4% to 17.9%)       |
| Niue            | Physical violence by other means                | 1 (0 to 1) | 1 (0 to 1) | -11.7% (-17.7% to -6.1%)  |
| Niue            | Physical violence by sharp object               | 0 (0 to 0) | 0 (0 to 0) | -29.3% (-38% to -21%)     |
| Niue            | Poisoning by carbon monoxide                    | 0 (0 to 0) | 0 (0 to 0) | 15.1% (6.2% to 25.1%)     |
| Niue            | Poisoning by other means                        | 0 (0 to 0) | 0 (0 to 0) | -10.5% (-15.9% to -4.3%)  |
| Niue            | Pulmonary aspiration and foreign body in airway | 0 (0 to 0) | 0 (0 to 0) | -5.8% (-14.9% to 3.8%)    |
| Niue            | Self-harm by firearm                            | 0 (0 to 0) | 0 (0 to 0) | -10.8% (-22.4% to 2.8%)   |
| Niue            | Self-harm by other specified means              | 0 (0 to 0) | 0 (0 to 0) | -9.7% (-15.7% to -3.6%)   |
| Niue            | Unintentional firearm injuries                  | 0 (0 to 0) | 0 (0 to 0) | -10.8% (-17.7% to -4%)    |
| Niue            | Venomous animal contact                         | 0 (0 to 0) | 0 (0 to 0) | -11.8% (-17.9% to -4.9%)  |
| North Macedonia | Adverse effects of medical treatment            | 0 (0 to 0) | 0 (0 to 0) | 0% (0% to 0%)             |
| North Macedonia | Conflict and terrorism                          | 0 (0 to 0) | 0 (0 to 0) | NA                        |
| North Macedonia | Cyclist road injuries                           | 1 (0 to 1) | 1 (0 to 1) | -4.2% (-12.5% to 3.8%)    |
| North Macedonia | Drowning                                        | 0 (0 to 0) | 0 (0 to 0) | 197.2% (156% to 251.8%)   |
| North Macedonia | Environmental heat and cold exposure            | 0 (0 to 0) | 0 (0 to 0) | 2.9% (-1% to 6.7%)        |
| North Macedonia | Executions and police conflict                  | 0 (0 to 0) | 0 (0 to 0) | NA                        |
| North Macedonia | Exposure to forces of nature                    | 0 (0 to 0) | 0 (0 to 0) | NA                        |
| North Macedonia | Falls                                           | 3 (2 to 4) | 5 (4 to 7) | 70% (60.1% to 79.9%)      |
| North Macedonia | Fire, heat, and hot substances                  | 0 (0 to 0) | 0 (0 to 0) | 5.4% (1.7% to 9.7%)       |
| North Macedonia | Foreign body in eyes                            | 0 (0 to 0) | 0 (0 to 0) | 0% (0% to 0%)             |
| North Macedonia | Foreign body in other body part                 | 0 (0 to 0) | 0 (0 to 0) | 1.7% (-3% to 6.4%)        |
| North Macedonia | Motor vehicle road injuries                     | 1 (1 to 2) | 1 (1 to 2) | 1.9% (-6.5% to 9.8%)      |
| North Macedonia | Motorcyclist road injuries                      | 0 (0 to 0) | 0 (0 to 0) | 22.6% (7.2% to 39.9%)     |
| North Macedonia | Non-venomous animal contact                     | 0 (0 to 0) | 0 (0 to 0) | -9.2% (-13% to -5.1%)     |
| North Macedonia | Other exposure to mechanical forces             | 1 (1 to 3) | 2 (1 to 3) | 6.3% (1.4% to 11.1%)      |
| North Macedonia | Other road injuries                             | 0 (0 to 0) | 0 (0 to 0) | -8.8% (-18.6% to 0.1%)    |
| North Macedonia | Other transport injuries                        | 0 (0 to 0) | 0 (0 to 0) | 8.5% (3.6% to 13.6%)      |
| North Macedonia | Other unintentional injuries                    | 1 (1 to 1) | 0 (0 to 1) | -63.8% (-67.4% to -59.7%) |
| North Macedonia | Pedestrian road injuries                        | 0 (0 to 1) | 0 (0 to 1) | -22.9% (-30.5% to -15%)   |
| North Macedonia | Physical violence by firearm                    | 0 (0 to 0) | 0 (0 to 0) | 83.2% (58.8% to 113%)     |
| North Macedonia | Physical violence by other means                | 0 (0 to 1) | 0 (0 to 1) | -30.9% (-39.7% to -23%)   |
| North Macedonia | Physical violence by sharp object               | 0 (0 to 0) | 0 (0 to 0) | -7.1% (-19.8% to 7.7%)    |
| North Macedonia | Poisoning by carbon monoxide                    | 0 (0 to 0) | 0 (0 to 0) | 39.1% (29% to 52.1%)      |
| North Macedonia | Poisoning by other means                        | 0 (0 to 0) | 0 (0 to 0) | 5.9% (-0.8% to 12.3%)     |

|                          |                                                 |               |               |                           |
|--------------------------|-------------------------------------------------|---------------|---------------|---------------------------|
| North Macedonia          | Pulmonary aspiration and foreign body in airway | 0 (0 to 0)    | 0 (0 to 0)    | -9.4% (-15.9% to -2.1%)   |
| North Macedonia          | Self-harm by firearm                            | 0 (0 to 0)    | 0 (0 to 0)    | 28.5% (15% to 48.4%)      |
| North Macedonia          | Self-harm by other specified means              | 0 (0 to 0)    | 0 (0 to 0)    | -12.6% (-17.7% to -7.1%)  |
| North Macedonia          | Unintentional firearm injuries                  | 0 (0 to 0)    | 0 (0 to 0)    | -7.5% (-15.6% to 0.6%)    |
| North Macedonia          | Venomous animal contact                         | 0 (0 to 0)    | 0 (0 to 0)    | -10.8% (-15.8% to -5.2%)  |
| Northern Mariana Islands | Adverse effects of medical treatment            | 0 (0 to 0)    | 0 (0 to 0)    | 0% (0% to 0%)             |
| Northern Mariana Islands | Conflict and terrorism                          | 0 (0 to 0)    | 0 (0 to 0)    | NA                        |
| Northern Mariana Islands | Cyclist road injuries                           | 0 (0 to 1)    | 0 (0 to 1)    | 0% (-7.7% to 8.8%)        |
| Northern Mariana Islands | Drowning                                        | 0 (0 to 0)    | 0 (0 to 0)    | 40.5% (29.5% to 52%)      |
| Northern Mariana Islands | Environmental heat and cold exposure            | 0 (0 to 0)    | 0 (0 to 0)    | 2.2% (-4.2% to 7.2%)      |
| Northern Mariana Islands | Executions and police conflict                  | 0 (0 to 0)    | 0 (0 to 0)    | NA                        |
| Northern Mariana Islands | Exposure to forces of nature                    | 0 (0 to 0)    | 0 (0 to 0)    | NA                        |
| Northern Mariana Islands | Falls                                           | 6 (4 to 8)    | 8 (6 to 12)   | 45.2% (39.3% to 51.3%)    |
| Northern Mariana Islands | Fire, heat, and hot substances                  | 0 (0 to 0)    | 0 (0 to 0)    | 4.1% (-1.5% to 9.1%)      |
| Northern Mariana Islands | Foreign body in eyes                            | 0 (0 to 0)    | 0 (0 to 0)    | 0% (0% to 0%)             |
| Northern Mariana Islands | Foreign body in other body part                 | 0 (0 to 0)    | 0 (0 to 0)    | -1.5% (-5.1% to 2.6%)     |
| Northern Mariana Islands | Motor vehicle road injuries                     | 1 (1 to 3)    | 1 (0 to 2)    | -44.5% (-49.7% to -39.6%) |
| Northern Mariana Islands | Motorcyclist road injuries                      | 1 (0 to 2)    | 1 (0 to 1)    | -12.3% (-20.1% to -2.1%)  |
| Northern Mariana Islands | Non-venomous animal contact                     | 0 (0 to 0)    | 0 (0 to 0)    | 10.3% (5.6% to 15.2%)     |
| Northern Mariana Islands | Other exposure to mechanical forces             | 0 (0 to 1)    | 0 (0 to 0)    | -37.8% (-43.2% to -32.2%) |
| Northern Mariana Islands | Other road injuries                             | 0 (0 to 0)    | 0 (0 to 0)    | -7.9% (-17.3% to 2.9%)    |
| Northern Mariana Islands | Other transport injuries                        | 1 (0 to 1)    | 0 (0 to 1)    | -39.9% (-45.3% to -34.1%) |
| Northern Mariana Islands | Other unintentional injuries                    | 0 (0 to 1)    | 0 (0 to 0)    | -17.1% (-21.4% to -12.4%) |
| Northern Mariana Islands | Pedestrian road injuries                        | 1 (1 to 2)    | 1 (0 to 1)    | -37.8% (-43.7% to -31.9%) |
| Northern Mariana Islands | Physical violence by firearm                    | 0 (0 to 0)    | 0 (0 to 0)    | -43.8% (-53.4% to -33.5%) |
| Northern Mariana Islands | Physical violence by other means                | 1 (0 to 2)    | 1 (0 to 1)    | -9.1% (-15.2% to -1.5%)   |
| Northern Mariana Islands | Physical violence by sharp object               | 0 (0 to 0)    | 0 (0 to 0)    | -55.4% (-62% to -48.2%)   |
| Northern Mariana Islands | Poisoning by carbon monoxide                    | 0 (0 to 0)    | 0 (0 to 0)    | 13% (4.3% to 22.7%)       |
| Northern Mariana Islands | Poisoning by other means                        | 0 (0 to 0)    | 0 (0 to 0)    | -5.9% (-12.2% to 0.2%)    |
| Northern Mariana Islands | Pulmonary aspiration and foreign body in airway | 0 (0 to 0)    | 0 (0 to 0)    | 27.1% (11.2% to 45.3%)    |
| Northern Mariana Islands | Self-harm by firearm                            | 0 (0 to 0)    | 0 (0 to 0)    | -11.5% (-30.4% to 5.3%)   |
| Northern Mariana Islands | Self-harm by other specified means              | 0 (0 to 0)    | 0 (0 to 0)    | 31.3% (21.8% to 43.3%)    |
| Northern Mariana Islands | Unintentional firearm injuries                  | 0 (0 to 0)    | 0 (0 to 0)    | -39.7% (-47.8% to -31.4%) |
| Northern Mariana Islands | Venomous animal contact                         | 0 (0 to 0)    | 0 (0 to 0)    | 8.1% (0.2% to 15.5%)      |
| Norway                   | Adverse effects of medical treatment            | 0 (0 to 0)    | 0 (0 to 0)    | 0% (0% to 0%)             |
| Norway                   | Conflict and terrorism                          | 0 (0 to 0)    | 0 (0 to 0)    | NA                        |
| Norway                   | Cyclist road injuries                           | 1 (0 to 1)    | 0 (0 to 1)    | -28.5% (-32.2% to -24.6%) |
| Norway                   | Drowning                                        | 0 (0 to 0)    | 0 (0 to 0)    | -7.8% (-11.6% to -4.3%)   |
| Norway                   | Environmental heat and cold exposure            | 0 (0 to 0)    | 0 (0 to 0)    | -14.7% (-18% to -12.2%)   |
| Norway                   | Executions and police conflict                  | 0 (0 to 0)    | 0 (0 to 0)    | NA                        |
| Norway                   | Exposure to forces of nature                    | 0 (0 to 0)    | 0 (0 to 0)    | NA                        |
| Norway                   | Falls                                           | 20 (13 to 31) | 21 (14 to 33) | 6.6% (3.9% to 9.5%)       |
| Norway                   | Fire, heat, and hot substances                  | 0 (0 to 0)    | 0 (0 to 0)    | -25.3% (-28.6% to -22.2%) |

|        |                                                 |            |            |                           |
|--------|-------------------------------------------------|------------|------------|---------------------------|
| Norway | Foreign body in eyes                            | 0 (0 to 0) | 0 (0 to 0) | 0% (0% to 0%)             |
| Norway | Foreign body in other body part                 | 1 (0 to 1) | 1 (0 to 1) | 2.7% (1.8% to 3.8%)       |
| Norway | Motor vehicle road injuries                     | 1 (0 to 1) | 0 (0 to 1) | -43.5% (-47% to -39.8%)   |
| Norway | Motorcyclist road injuries                      | 1 (0 to 1) | 0 (0 to 1) | -47.9% (-51.5% to -44.5%) |
| Norway | Non-venomous animal contact                     | 0 (0 to 0) | 0 (0 to 0) | -6.3% (-7.9% to -4.7%)    |
| Norway | Other exposure to mechanical forces             | 1 (0 to 2) | 1 (0 to 1) | -20.1% (-24.6% to -16.7%) |
| Norway | Other road injuries                             | 0 (0 to 0) | 0 (0 to 0) | -58.7% (-64.2% to -53.5%) |
| Norway | Other transport injuries                        | 1 (0 to 1) | 0 (0 to 1) | -47.4% (-49.5% to -45.3%) |
| Norway | Other unintentional injuries                    | 1 (0 to 1) | 1 (0 to 1) | -4.8% (-8% to -1.7%)      |
| Norway | Pedestrian road injuries                        | 0 (0 to 1) | 0 (0 to 0) | -38.6% (-43.9% to -32.7%) |
| Norway | Physical violence by firearm                    | 0 (0 to 0) | 0 (0 to 0) | 25.6% (17.1% to 36%)      |
| Norway | Physical violence by other means                | 0 (0 to 1) | 0 (0 to 0) | -20.8% (-25.5% to -16.9%) |
| Norway | Physical violence by sharp object               | 0 (0 to 0) | 0 (0 to 0) | -25.7% (-32.4% to -19.8%) |
| Norway | Poisoning by carbon monoxide                    | 0 (0 to 0) | 0 (0 to 0) | -1.6% (-5.5% to 2.1%)     |
| Norway | Poisoning by other means                        | 0 (0 to 0) | 0 (0 to 0) | 18.8% (14.5% to 22.5%)    |
| Norway | Pulmonary aspiration and foreign body in airway | 0 (0 to 0) | 0 (0 to 0) | -10.6% (-13.8% to -7.8%)  |
| Norway | Self-harm by firearm                            | 0 (0 to 0) | 0 (0 to 0) | -48.2% (-55.8% to -41%)   |
| Norway | Self-harm by other specified means              | 0 (0 to 0) | 0 (0 to 0) | -24.1% (-26.6% to -20.5%) |
| Norway | Unintentional firearm injuries                  | 0 (0 to 0) | 0 (0 to 0) | -1.8% (-7.2% to 2.2%)     |
| Norway | Venomous animal contact                         | 0 (0 to 0) | 0 (0 to 0) | -6% (-8.6% to -2.9%)      |
| Oman   | Adverse effects of medical treatment            | 0 (0 to 0) | 0 (0 to 0) | 0% (0% to 0%)             |
| Oman   | Conflict and terrorism                          | 0 (0 to 0) | 0 (0 to 0) | NA                        |
| Oman   | Cyclist road injuries                           | 0 (0 to 0) | 0 (0 to 0) | -17.3% (-26.2% to -7.5%)  |
| Oman   | Drowning                                        | 0 (0 to 0) | 0 (0 to 0) | 67.6% (47.1% to 90.6%)    |
| Oman   | Environmental heat and cold exposure            | 0 (0 to 0) | 0 (0 to 0) | -8.7% (-13.6% to -3%)     |
| Oman   | Executions and police conflict                  | 0 (0 to 0) | 0 (0 to 0) | NA                        |
| Oman   | Exposure to forces of nature                    | 0 (0 to 0) | 0 (0 to 0) | NA                        |
| Oman   | Falls                                           | 3 (2 to 3) | 3 (2 to 5) | 27.5% (22.4% to 32.9%)    |
| Oman   | Fire, heat, and hot substances                  | 0 (0 to 0) | 0 (0 to 0) | 4% (-3.1% to 12%)         |
| Oman   | Foreign body in eyes                            | 0 (0 to 0) | 0 (0 to 0) | 0% (0% to 0%)             |
| Oman   | Foreign body in other body part                 | 0 (0 to 0) | 0 (0 to 0) | 0.2% (-3.4% to 4.1%)      |
| Oman   | Motor vehicle road injuries                     | 2 (1 to 3) | 1 (1 to 2) | -26% (-32.8% to -18.2%)   |
| Oman   | Motorcyclist road injuries                      | 0 (0 to 0) | 0 (0 to 0) | -27.8% (-38.4% to -15.5%) |
| Oman   | Non-venomous animal contact                     | 0 (0 to 0) | 0 (0 to 0) | -5.5% (-10.3% to -1.2%)   |
| Oman   | Other exposure to mechanical forces             | 0 (0 to 1) | 0 (0 to 0) | -36.8% (-43.6% to -30.7%) |
| Oman   | Other road injuries                             | 0 (0 to 0) | 0 (0 to 0) | -2.7% (-14% to 10.1%)     |
| Oman   | Other transport injuries                        | 0 (0 to 0) | 0 (0 to 0) | 9.1% (4% to 14.1%)        |
| Oman   | Other unintentional injuries                    | 0 (0 to 0) | 0 (0 to 0) | 9.8% (5.3% to 15%)        |
| Oman   | Pedestrian road injuries                        | 1 (0 to 1) | 1 (0 to 1) | -22.2% (-29.3% to -13.9%) |
| Oman   | Physical violence by firearm                    | 0 (0 to 0) | 0 (0 to 0) | 118.7% (87.3% to 159.5%)  |
| Oman   | Physical violence by other means                | 0 (0 to 0) | 0 (0 to 0) | -4.2% (-15% to 4.9%)      |
| Oman   | Physical violence by sharp object               | 0 (0 to 0) | 0 (0 to 0) | -5.9% (-18.3% to 4.4%)    |
| Oman   | Poisoning by carbon monoxide                    | 0 (0 to 0) | 0 (0 to 0) | 38.9% (25.3% to 54.2%)    |

|          |                                                 |             |              |                           |
|----------|-------------------------------------------------|-------------|--------------|---------------------------|
| Oman     | Poisoning by other means                        | 0 (0 to 0)  | 0 (0 to 0)   | -22.7% (-31.1% to -14.2%) |
| Oman     | Pulmonary aspiration and foreign body in airway | 0 (0 to 0)  | 0 (0 to 0)   | -2% (-9.6% to 4.9%)       |
| Oman     | Self-harm by firearm                            | 0 (0 to 0)  | 0 (0 to 0)   | 22.3% (9.1% to 39.8%)     |
| Oman     | Self-harm by other specified means              | 0 (0 to 0)  | 0 (0 to 0)   | 3.5% (-3.7% to 10.6%)     |
| Oman     | Unintentional firearm injuries                  | 0 (0 to 0)  | 0 (0 to 0)   | -4.7% (-15.1% to 7.1%)    |
| Oman     | Venomous animal contact                         | 0 (0 to 0)  | 0 (0 to 0)   | -2.4% (-8.7% to 4.6%)     |
| Pakistan | Adverse effects of medical treatment            | 0 (0 to 0)  | 0 (0 to 0)   | 0% (0% to 0%)             |
| Pakistan | Conflict and terrorism                          | 0 (0 to 0)  | 0 (0 to 0)   | NA                        |
| Pakistan | Cyclist road injuries                           | 1 (0 to 1)  | 1 (0 to 1)   | 27.4% (22% to 32.3%)      |
| Pakistan | Drowning                                        | 0 (0 to 0)  | 0 (0 to 0)   | -3.2% (-13.4% to 8%)      |
| Pakistan | Environmental heat and cold exposure            | 0 (0 to 0)  | 0 (0 to 0)   | 1.2% (-2% to 4.5%)        |
| Pakistan | Executions and police conflict                  | 0 (0 to 0)  | 0 (0 to 0)   | NA                        |
| Pakistan | Exposure to forces of nature                    | 0 (0 to 0)  | 0 (0 to 0)   | NA                        |
| Pakistan | Falls                                           | 1 (1 to 1)  | 1 (1 to 2)   | 31.2% (27.8% to 34.8%)    |
| Pakistan | Fire, heat, and hot substances                  | 0 (0 to 0)  | 0 (0 to 0)   | -8.1% (-11.8% to -3.8%)   |
| Pakistan | Foreign body in eyes                            | 0 (0 to 0)  | 0 (0 to 0)   | 0% (0% to 0%)             |
| Pakistan | Foreign body in other body part                 | 0 (0 to 0)  | 0 (0 to 0)   | -5.1% (-7.5% to -2.6%)    |
| Pakistan | Motor vehicle road injuries                     | 1 (0 to 1)  | 1 (0 to 1)   | 47.7% (41.3% to 54.1%)    |
| Pakistan | Motorcyclist road injuries                      | 0 (0 to 1)  | 1 (0 to 1)   | 74.1% (66.1% to 82.9%)    |
| Pakistan | Non-venomous animal contact                     | 0 (0 to 0)  | 0 (0 to 0)   | -15.8% (-18.4% to -13.3%) |
| Pakistan | Other exposure to mechanical forces             | 0 (0 to 0)  | 0 (0 to 0)   | -1.9% (-5.3% to 2.1%)     |
| Pakistan | Other road injuries                             | 0 (0 to 0)  | 0 (0 to 0)   | 19.6% (12.5% to 26.4%)    |
| Pakistan | Other transport injuries                        | 0 (0 to 0)  | 0 (0 to 0)   | 14.1% (10.6% to 17.6%)    |
| Pakistan | Other unintentional injuries                    | 0 (0 to 0)  | 0 (0 to 0)   | -12.8% (-15.3% to -9.6%)  |
| Pakistan | Pedestrian road injuries                        | 0 (0 to 1)  | 0 (0 to 1)   | 41% (34.4% to 47.6%)      |
| Pakistan | Physical violence by firearm                    | 0 (0 to 0)  | 0 (0 to 0)   | -13.3% (-19.9% to -5.2%)  |
| Pakistan | Physical violence by other means                | 1 (0 to 1)  | 1 (0 to 1)   | -7.1% (-11.2% to -2.7%)   |
| Pakistan | Physical violence by sharp object               | 0 (0 to 0)  | 0 (0 to 0)   | -0.3% (-5.9% to 6%)       |
| Pakistan | Poisoning by carbon monoxide                    | 0 (0 to 0)  | 0 (0 to 0)   | -16.5% (-23.6% to -9.7%)  |
| Pakistan | Poisoning by other means                        | 0 (0 to 0)  | 0 (0 to 0)   | -22.1% (-27.8% to -16.7%) |
| Pakistan | Pulmonary aspiration and foreign body in airway | 0 (0 to 0)  | 0 (0 to 0)   | -8.5% (-13.4% to -3.6%)   |
| Pakistan | Self-harm by firearm                            | 0 (0 to 0)  | 0 (0 to 0)   | 26.2% (17.1% to 35.7%)    |
| Pakistan | Self-harm by other specified means              | 0 (0 to 0)  | 0 (0 to 0)   | 20.4% (15.9% to 25.2%)    |
| Pakistan | Unintentional firearm injuries                  | 0 (0 to 0)  | 0 (0 to 0)   | -7.5% (-12.1% to -2.8%)   |
| Pakistan | Venomous animal contact                         | 0 (0 to 0)  | 0 (0 to 0)   | -10.2% (-15.5% to -5.3%)  |
| Palau    | Adverse effects of medical treatment            | 0 (0 to 0)  | 0 (0 to 0)   | 0% (0% to 0%)             |
| Palau    | Conflict and terrorism                          | 0 (0 to 0)  | 0 (0 to 0)   | NA                        |
| Palau    | Cyclist road injuries                           | 0 (0 to 1)  | 0 (0 to 1)   | 5.3% (-1.7% to 13.6%)     |
| Palau    | Drowning                                        | 0 (0 to 0)  | 0 (0 to 0)   | 34.4% (24.9% to 46.3%)    |
| Palau    | Environmental heat and cold exposure            | 0 (0 to 0)  | 0 (0 to 0)   | -4.1% (-8.3% to 0.8%)     |
| Palau    | Executions and police conflict                  | 0 (0 to 0)  | 0 (0 to 0)   | NA                        |
| Palau    | Exposure to forces of nature                    | 0 (0 to 0)  | 0 (0 to 0)   | NA                        |
| Palau    | Falls                                           | 8 (6 to 12) | 11 (7 to 16) | 31.8% (26.7% to 36.6%)    |



|           |                                                 |              |            |                           |
|-----------|-------------------------------------------------|--------------|------------|---------------------------|
| Palau     | Fire, heat, and hot substances                  | 0 (0 to 0)   | 0 (0 to 0) | -10.2% (-14.7% to -5.6%)  |
| Palau     | Foreign body in eyes                            | 0 (0 to 0)   | 0 (0 to 0) | 0% (0% to 0%)             |
| Palau     | Foreign body in other body part                 | 0 (0 to 0)   | 0 (0 to 0) | -3.3% (-6.7% to 0.1%)     |
| Palau     | Motor vehicle road injuries                     | 1 (0 to 1)   | 1 (0 to 1) | -1.2% (-8.5% to 7.2%)     |
| Palau     | Motorcyclist road injuries                      | 1 (0 to 2)   | 1 (0 to 2) | 0.2% (-7.5% to 8.5%)      |
| Palau     | Non-venomous animal contact                     | 0 (0 to 1)   | 0 (0 to 1) | -4.1% (-8.6% to 1.1%)     |
| Palau     | Other exposure to mechanical forces             | 0 (0 to 1)   | 0 (0 to 1) | -11.3% (-16.2% to -5.9%)  |
| Palau     | Other road injuries                             | 0 (0 to 0)   | 0 (0 to 0) | 8.7% (-2.6% to 21.2%)     |
| Palau     | Other transport injuries                        | 1 (0 to 1)   | 1 (0 to 1) | -0.1% (-5.3% to 4.4%)     |
| Palau     | Other unintentional injuries                    | 0 (0 to 1)   | 0 (0 to 1) | -9.2% (-13.8% to -4.4%)   |
| Palau     | Pedestrian road injuries                        | 1 (0 to 1)   | 1 (0 to 1) | -0.3% (-7.1% to 7.6%)     |
| Palau     | Physical violence by firearm                    | 0 (0 to 0)   | 0 (0 to 0) | 26.8% (13.5% to 41.5%)    |
| Palau     | Physical violence by other means                | 1 (0 to 2)   | 1 (0 to 2) | -5.9% (-11.2% to -0.2%)   |
| Palau     | Physical violence by sharp object               | 0 (0 to 0)   | 0 (0 to 0) | -11.4% (-20.9% to -0.6%)  |
| Palau     | Poisoning by carbon monoxide                    | 0 (0 to 0)   | 0 (0 to 0) | 8.1% (-2.1% to 19.5%)     |
| Palau     | Poisoning by other means                        | 0 (0 to 0)   | 0 (0 to 0) | -26% (-31.7% to -20.7%)   |
| Palau     | Pulmonary aspiration and foreign body in airway | 0 (0 to 0)   | 0 (0 to 0) | -8.4% (-17.4% to 1.6%)    |
| Palau     | Self-harm by firearm                            | 0 (0 to 0)   | 0 (0 to 0) | 13% (-3.7% to 33.9%)      |
| Palau     | Self-harm by other specified means              | 0 (0 to 0)   | 0 (0 to 0) | -3.5% (-10.9% to 4.6%)    |
| Palau     | Unintentional firearm injuries                  | 0 (0 to 0)   | 0 (0 to 0) | -12.9% (-19.7% to -5%)    |
| Palau     | Venomous animal contact                         | 0 (0 to 0)   | 0 (0 to 0) | -1.1% (-8.3% to 8.2%)     |
| Palestine | Adverse effects of medical treatment            | 0 (0 to 0)   | 0 (0 to 0) | 0% (0% to 0%)             |
| Palestine | Conflict and terrorism                          | 12 (3 to 37) | 1 (0 to 2) | NA                        |
| Palestine | Cyclist road injuries                           | 0 (0 to 0)   | 0 (0 to 0) | 0.5% (-8% to 10.8%)       |
| Palestine | Drowning                                        | 0 (0 to 0)   | 0 (0 to 0) | 63.2% (41.6% to 84.2%)    |
| Palestine | Environmental heat and cold exposure            | 0 (0 to 0)   | 0 (0 to 0) | 3% (-1.6% to 8.2%)        |
| Palestine | Executions and police conflict                  | 0 (0 to 0)   | 0 (0 to 0) | NA                        |
| Palestine | Exposure to forces of nature                    | 0 (0 to 0)   | 0 (0 to 0) | NA                        |
| Palestine | Falls                                           | 2 (1 to 3)   | 2 (2 to 3) | 14% (9.2% to 18%)         |
| Palestine | Fire, heat, and hot substances                  | 0 (0 to 0)   | 0 (0 to 0) | -3.3% (-13.4% to 6.4%)    |
| Palestine | Foreign body in eyes                            | 0 (0 to 0)   | 0 (0 to 0) | 0% (0% to 0%)             |
| Palestine | Foreign body in other body part                 | 0 (0 to 0)   | 0 (0 to 0) | 0.8% (-2.8% to 4.1%)      |
| Palestine | Motor vehicle road injuries                     | 0 (0 to 1)   | 0 (0 to 1) | -20.6% (-27.1% to -13.9%) |
| Palestine | Motorcyclist road injuries                      | 0 (0 to 0)   | 0 (0 to 0) | -14.3% (-24.3% to -3.7%)  |
| Palestine | Non-venomous animal contact                     | 0 (0 to 0)   | 0 (0 to 0) | -3.6% (-8.5% to 0.6%)     |
| Palestine | Other exposure to mechanical forces             | 0 (0 to 0)   | 0 (0 to 0) | 1% (-7.4% to 10%)         |
| Palestine | Other road injuries                             | 0 (0 to 0)   | 0 (0 to 0) | 2.1% (-7.3% to 13.3%)     |
| Palestine | Other transport injuries                        | 0 (0 to 0)   | 0 (0 to 0) | 5.9% (1.9% to 10.5%)      |
| Palestine | Other unintentional injuries                    | 0 (0 to 0)   | 0 (0 to 0) | -3.6% (-10.9% to 2.9%)    |
| Palestine | Pedestrian road injuries                        | 0 (0 to 0)   | 0 (0 to 0) | -16.6% (-24.2% to -8.2%)  |
| Palestine | Physical violence by firearm                    | 0 (0 to 0)   | 0 (0 to 0) | 402.2% (313.1% to 531.8%) |
| Palestine | Physical violence by other means                | 0 (0 to 0)   | 0 (0 to 0) | 89.9% (61.8% to 120.5%)   |
| Palestine | Physical violence by sharp object               | 0 (0 to 0)   | 0 (0 to 0) | 70.7% (43.1% to 101%)     |

|                  |                                                 |            |            |                           |
|------------------|-------------------------------------------------|------------|------------|---------------------------|
| Palestine        | Poisoning by carbon monoxide                    | 0 (0 to 0) | 0 (0 to 0) | 61.6% (46.4% to 78.5%)    |
| Palestine        | Poisoning by other means                        | 0 (0 to 0) | 0 (0 to 0) | 9.2% (1% to 17.3%)        |
| Palestine        | Pulmonary aspiration and foreign body in airway | 0 (0 to 0) | 0 (0 to 0) | 0.5% (-6.5% to 7.7%)      |
| Palestine        | Self-harm by firearm                            | 0 (0 to 0) | 0 (0 to 0) | 25.1% (13.7% to 39.3%)    |
| Palestine        | Self-harm by other specified means              | 0 (0 to 0) | 0 (0 to 0) | 3.7% (-3% to 10.4%)       |
| Palestine        | Unintentional firearm injuries                  | 0 (0 to 0) | 0 (0 to 0) | -27.9% (-38.9% to -18.6%) |
| Palestine        | Venomous animal contact                         | 0 (0 to 0) | 0 (0 to 0) | -3.6% (-10.3% to 3.1%)    |
| Panama           | Adverse effects of medical treatment            | 0 (0 to 0) | 0 (0 to 0) | 0% (0% to 0%)             |
| Panama           | Conflict and terrorism                          | 0 (0 to 0) | 0 (0 to 0) | NA                        |
| Panama           | Cyclist road injuries                           | 0 (0 to 0) | 0 (0 to 0) | -29% (-36.9% to -20.8%)   |
| Panama           | Drowning                                        | 0 (0 to 0) | 0 (0 to 0) | 11.3% (-2.1% to 25.8%)    |
| Panama           | Environmental heat and cold exposure            | 0 (0 to 0) | 0 (0 to 0) | 3.2% (-0.7% to 8.2%)      |
| Panama           | Executions and police conflict                  | 0 (0 to 0) | 0 (0 to 0) | NA                        |
| Panama           | Exposure to forces of nature                    | 0 (0 to 0) | 0 (0 to 0) | NA                        |
| Panama           | Falls                                           | 2 (1 to 3) | 2 (1 to 3) | -2.6% (-7.5% to 2.4%)     |
| Panama           | Fire, heat, and hot substances                  | 0 (0 to 0) | 0 (0 to 0) | 0.7% (-4.4% to 7.1%)      |
| Panama           | Foreign body in eyes                            | 0 (0 to 0) | 0 (0 to 0) | 0% (0% to 0%)             |
| Panama           | Foreign body in other body part                 | 0 (0 to 0) | 0 (0 to 0) | -3.8% (-7.9% to 0.1%)     |
| Panama           | Motor vehicle road injuries                     | 1 (0 to 1) | 1 (0 to 1) | -16.9% (-23.9% to -8.6%)  |
| Panama           | Motorcyclist road injuries                      | 0 (0 to 0) | 0 (0 to 0) | 33% (19.7% to 48.5%)      |
| Panama           | Non-venomous animal contact                     | 0 (0 to 0) | 0 (0 to 0) | -24.3% (-29.5% to -19%)   |
| Panama           | Other exposure to mechanical forces             | 0 (0 to 1) | 0 (0 to 1) | -1.6% (-8.4% to 4.8%)     |
| Panama           | Other road injuries                             | 0 (0 to 0) | 0 (0 to 0) | -6.4% (-16.2% to 4.6%)    |
| Panama           | Other transport injuries                        | 0 (0 to 0) | 0 (0 to 0) | -1.3% (-5.4% to 3.1%)     |
| Panama           | Other unintentional injuries                    | 0 (0 to 0) | 0 (0 to 0) | -15.1% (-20.3% to -10.2%) |
| Panama           | Pedestrian road injuries                        | 0 (0 to 1) | 0 (0 to 0) | -35.4% (-42.9% to -28%)   |
| Panama           | Physical violence by firearm                    | 0 (0 to 0) | 0 (0 to 0) | 204% (139.9% to 302.5%)   |
| Panama           | Physical violence by other means                | 0 (0 to 0) | 0 (0 to 0) | 38.9% (17.8% to 62.8%)    |
| Panama           | Physical violence by sharp object               | 0 (0 to 0) | 0 (0 to 0) | 0.2% (-20.3% to 21.8%)    |
| Panama           | Poisoning by carbon monoxide                    | 0 (0 to 0) | 0 (0 to 0) | 42.6% (29% to 58.5%)      |
| Panama           | Poisoning by other means                        | 0 (0 to 0) | 0 (0 to 0) | 0.9% (-6.4% to 11.6%)     |
| Panama           | Pulmonary aspiration and foreign body in airway | 0 (0 to 0) | 0 (0 to 0) | -42% (-49.4% to -33.2%)   |
| Panama           | Self-harm by firearm                            | 0 (0 to 0) | 0 (0 to 0) | 8.7% (-4.5% to 23%)       |
| Panama           | Self-harm by other specified means              | 0 (0 to 0) | 0 (0 to 0) | 1% (-5.8% to 7.6%)        |
| Panama           | Unintentional firearm injuries                  | 0 (0 to 0) | 0 (0 to 0) | 11.9% (2.7% to 22.4%)     |
| Panama           | Venomous animal contact                         | 0 (0 to 0) | 0 (0 to 0) | -35.7% (-41.6% to -31.4%) |
| Papua New Guinea | Adverse effects of medical treatment            | 0 (0 to 0) | 0 (0 to 0) | 0% (0% to 0%)             |
| Papua New Guinea | Conflict and terrorism                          | 0 (0 to 1) | 0 (0 to 0) | NA                        |
| Papua New Guinea | Cyclist road injuries                           | 0 (0 to 0) | 0 (0 to 0) | 6.3% (-1% to 14.1%)       |
| Papua New Guinea | Drowning                                        | 0 (0 to 0) | 0 (0 to 0) | 5.9% (-3.4% to 15.6%)     |
| Papua New Guinea | Environmental heat and cold exposure            | 0 (0 to 0) | 0 (0 to 0) | -2.1% (-7.5% to 3.4%)     |
| Papua New Guinea | Executions and police conflict                  | 0 (0 to 0) | 0 (0 to 0) | NA                        |
| Papua New Guinea | Exposure to forces of nature                    | 0 (0 to 0) | 0 (0 to 0) | NA                        |

|                  |                                                 |            |            |                          |
|------------------|-------------------------------------------------|------------|------------|--------------------------|
| Papua New Guinea | Falls                                           | 2 (1 to 2) | 2 (2 to 3) | 46.4% (39.8% to 53.3%)   |
| Papua New Guinea | Fire, heat, and hot substances                  | 0 (0 to 0) | 0 (0 to 0) | 1.1% (-4.1% to 6%)       |
| Papua New Guinea | Foreign body in eyes                            | 0 (0 to 0) | 0 (0 to 0) | 0% (0% to 0%)            |
| Papua New Guinea | Foreign body in other body part                 | 0 (0 to 0) | 0 (0 to 0) | -1.6% (-5.6% to 1.9%)    |
| Papua New Guinea | Motor vehicle road injuries                     | 1 (0 to 1) | 1 (0 to 1) | 0.3% (-6.6% to 7.8%)     |
| Papua New Guinea | Motorcyclist road injuries                      | 0 (0 to 0) | 0 (0 to 0) | 5.7% (-3.1% to 14.4%)    |
| Papua New Guinea | Non-venomous animal contact                     | 0 (0 to 0) | 0 (0 to 0) | -12% (-16.4% to -7.5%)   |
| Papua New Guinea | Other exposure to mechanical forces             | 0 (0 to 0) | 0 (0 to 0) | -6.1% (-12.5% to -0.2%)  |
| Papua New Guinea | Other road injuries                             | 0 (0 to 0) | 0 (0 to 0) | 5.1% (-5.4% to 15.5%)    |
| Papua New Guinea | Other transport injuries                        | 0 (0 to 0) | 0 (0 to 0) | -7.3% (-11.6% to -2.7%)  |
| Papua New Guinea | Other unintentional injuries                    | 0 (0 to 0) | 0 (0 to 0) | 1.3% (-3.9% to 6.2%)     |
| Papua New Guinea | Pedestrian road injuries                        | 0 (0 to 0) | 0 (0 to 0) | -4.9% (-13% to 3.1%)     |
| Papua New Guinea | Physical violence by firearm                    | 0 (0 to 0) | 0 (0 to 0) | 62.9% (48.9% to 77.2%)   |
| Papua New Guinea | Physical violence by other means                | 0 (0 to 1) | 1 (0 to 1) | 56.3% (45.5% to 66.9%)   |
| Papua New Guinea | Physical violence by sharp object               | 0 (0 to 0) | 0 (0 to 0) | 42.7% (29.5% to 55.2%)   |
| Papua New Guinea | Poisoning by carbon monoxide                    | 0 (0 to 0) | 0 (0 to 0) | 16.3% (4.9% to 28.9%)    |
| Papua New Guinea | Poisoning by other means                        | 0 (0 to 0) | 0 (0 to 0) | -9% (-14.8% to -2%)      |
| Papua New Guinea | Pulmonary aspiration and foreign body in airway | 0 (0 to 0) | 0 (0 to 0) | 3.2% (-7.7% to 14.6%)    |
| Papua New Guinea | Self-harm by firearm                            | 0 (0 to 0) | 0 (0 to 0) | -0.1% (-12.7% to 12.4%)  |
| Papua New Guinea | Self-harm by other specified means              | 0 (0 to 0) | 0 (0 to 0) | 5.3% (-1.1% to 12.3%)    |
| Papua New Guinea | Unintentional firearm injuries                  | 0 (0 to 0) | 0 (0 to 0) | -2.1% (-7.7% to 3.4%)    |
| Papua New Guinea | Venomous animal contact                         | 0 (0 to 0) | 0 (0 to 0) | -15.2% (-20.9% to -9.7%) |
| Paraguay         | Adverse effects of medical treatment            | 0 (0 to 0) | 0 (0 to 0) | 0% (0% to 0%)            |
| Paraguay         | Conflict and terrorism                          | 0 (0 to 0) | 0 (0 to 0) | NA                       |
| Paraguay         | Cyclist road injuries                           | 0 (0 to 0) | 0 (0 to 0) | -15.9% (-24.9% to -6%)   |
| Paraguay         | Drowning                                        | 0 (0 to 0) | 0 (0 to 0) | 10.8% (-1% to 22.6%)     |
| Paraguay         | Environmental heat and cold exposure            | 0 (0 to 0) | 0 (0 to 0) | 11.1% (6.6% to 16.5%)    |
| Paraguay         | Executions and police conflict                  | 0 (0 to 0) | 0 (0 to 0) | NA                       |
| Paraguay         | Exposure to forces of nature                    | 0 (0 to 0) | 0 (0 to 0) | NA                       |
| Paraguay         | Falls                                           | 2 (2 to 3) | 2 (2 to 3) | 5.4% (1.4% to 9.5%)      |
| Paraguay         | Fire, heat, and hot substances                  | 0 (0 to 0) | 0 (0 to 0) | -2.8% (-6.7% to 1.5%)    |
| Paraguay         | Foreign body in eyes                            | 0 (0 to 0) | 0 (0 to 0) | 0% (0% to 0%)            |
| Paraguay         | Foreign body in other body part                 | 0 (0 to 0) | 0 (0 to 0) | -2.2% (-6.8% to 2.5%)    |
| Paraguay         | Motor vehicle road injuries                     | 0 (0 to 0) | 0 (0 to 0) | 7.1% (-5.9% to 20.2%)    |
| Paraguay         | Motorcyclist road injuries                      | 0 (0 to 1) | 1 (0 to 1) | 59.1% (39.4% to 83.3%)   |
| Paraguay         | Non-venomous animal contact                     | 0 (0 to 0) | 0 (0 to 0) | -14.3% (-18.9% to -9.1%) |
| Paraguay         | Other exposure to mechanical forces             | 0 (0 to 0) | 0 (0 to 0) | -1.4% (-8.4% to 6.4%)    |
| Paraguay         | Other road injuries                             | 0 (0 to 0) | 0 (0 to 0) | -11.1% (-21.2% to 0.9%)  |
| Paraguay         | Other transport injuries                        | 0 (0 to 0) | 0 (0 to 0) | -5.1% (-8.6% to -1.4%)   |
| Paraguay         | Other unintentional injuries                    | 0 (0 to 0) | 0 (0 to 0) | -8.9% (-13.2% to -4.3%)  |
| Paraguay         | Pedestrian road injuries                        | 0 (0 to 0) | 0 (0 to 0) | -2.6% (-13.9% to 9.8%)   |
| Paraguay         | Physical violence by firearm                    | 0 (0 to 0) | 0 (0 to 0) | 31.8% (14.4% to 54.3%)   |
| Paraguay         | Physical violence by other means                | 0 (0 to 0) | 0 (0 to 0) | -5.7% (-14.8% to 3.7%)   |

|             |                                                 |             |            |                           |
|-------------|-------------------------------------------------|-------------|------------|---------------------------|
| Paraguay    | Physical violence by sharp object               | 0 (0 to 0)  | 0 (0 to 0) | -14.1% (-25.4% to -3.2%)  |
| Paraguay    | Poisoning by carbon monoxide                    | 0 (0 to 0)  | 0 (0 to 0) | 19.7% (8.5% to 31.3%)     |
| Paraguay    | Poisoning by other means                        | 0 (0 to 0)  | 0 (0 to 0) | -16.9% (-22.5% to -11.8%) |
| Paraguay    | Pulmonary aspiration and foreign body in airway | 0 (0 to 0)  | 0 (0 to 0) | -34.6% (-41.7% to -27%)   |
| Paraguay    | Self-harm by firearm                            | 0 (0 to 0)  | 0 (0 to 0) | 46.5% (31.5% to 63.7%)    |
| Paraguay    | Self-harm by other specified means              | 0 (0 to 0)  | 0 (0 to 0) | 63.3% (50.9% to 83.3%)    |
| Paraguay    | Unintentional firearm injuries                  | 0 (0 to 0)  | 0 (0 to 0) | -20.8% (-28.8% to -13.4%) |
| Paraguay    | Venomous animal contact                         | 0 (0 to 0)  | 0 (0 to 0) | -13.4% (-17.9% to -8.1%)  |
| Peru        | Adverse effects of medical treatment            | 0 (0 to 0)  | 0 (0 to 0) | 0% (0% to 0%)             |
| Peru        | Conflict and terrorism                          | 6 (1 to 17) | 0 (0 to 0) | NA                        |
| Peru        | Cyclist road injuries                           | 0 (0 to 0)  | 0 (0 to 0) | 0.5% (-8.1% to 9.8%)      |
| Peru        | Drowning                                        | 0 (0 to 0)  | 0 (0 to 0) | 33.8% (13.1% to 53.3%)    |
| Peru        | Environmental heat and cold exposure            | 0 (0 to 0)  | 0 (0 to 0) | -4.3% (-8.3% to -0.1%)    |
| Peru        | Executions and police conflict                  | 0 (0 to 0)  | 0 (0 to 0) | NA                        |
| Peru        | Exposure to forces of nature                    | 0 (0 to 1)  | 0 (0 to 0) | NA                        |
| Peru        | Falls                                           | 1 (1 to 2)  | 2 (1 to 2) | 50.3% (44.9% to 56%)      |
| Peru        | Fire, heat, and hot substances                  | 0 (0 to 0)  | 0 (0 to 0) | -11.4% (-18.9% to -4.7%)  |
| Peru        | Foreign body in eyes                            | 0 (0 to 0)  | 0 (0 to 0) | 0% (0% to 0%)             |
| Peru        | Foreign body in other body part                 | 0 (0 to 1)  | 0 (0 to 0) | -30.7% (-37.1% to -24.5%) |
| Peru        | Motor vehicle road injuries                     | 0 (0 to 1)  | 0 (0 to 0) | -12.7% (-20.1% to -4.8%)  |
| Peru        | Motorcyclist road injuries                      | 0 (0 to 0)  | 0 (0 to 0) | 25.2% (14.8% to 39.2%)    |
| Peru        | Non-venomous animal contact                     | 0 (0 to 0)  | 0 (0 to 0) | -9.2% (-13.5% to -4.9%)   |
| Peru        | Other exposure to mechanical forces             | 0 (0 to 0)  | 0 (0 to 1) | 10% (1.2% to 20.9%)       |
| Peru        | Other road injuries                             | 0 (0 to 0)  | 0 (0 to 0) | -0.5% (-9.6% to 10.2%)    |
| Peru        | Other transport injuries                        | 0 (0 to 0)  | 0 (0 to 0) | 3% (-1.7% to 8.4%)        |
| Peru        | Other unintentional injuries                    | 0 (0 to 0)  | 0 (0 to 0) | -28.6% (-34.5% to -23.1%) |
| Peru        | Pedestrian road injuries                        | 0 (0 to 0)  | 0 (0 to 0) | -16.4% (-23.9% to -8.5%)  |
| Peru        | Physical violence by firearm                    | 0 (0 to 0)  | 0 (0 to 0) | 73.3% (48.7% to 103.9%)   |
| Peru        | Physical violence by other means                | 0 (0 to 0)  | 0 (0 to 0) | -28% (-36.9% to -20.1%)   |
| Peru        | Physical violence by sharp object               | 0 (0 to 0)  | 0 (0 to 0) | -17.3% (-27.1% to -7.5%)  |
| Peru        | Poisoning by carbon monoxide                    | 0 (0 to 0)  | 0 (0 to 0) | 44.5% (26.2% to 63.7%)    |
| Peru        | Poisoning by other means                        | 0 (0 to 0)  | 0 (0 to 0) | -7.6% (-16.3% to 1.3%)    |
| Peru        | Pulmonary aspiration and foreign body in airway | 0 (0 to 0)  | 0 (0 to 0) | -63.9% (-69.5% to -57.4%) |
| Peru        | Self-harm by firearm                            | 0 (0 to 0)  | 0 (0 to 0) | 32.7% (19.6% to 52.5%)    |
| Peru        | Self-harm by other specified means              | 0 (0 to 0)  | 0 (0 to 0) | -4% (-12.8% to 5.1%)      |
| Peru        | Unintentional firearm injuries                  | 0 (0 to 0)  | 0 (0 to 0) | -15.3% (-24.9% to -7.4%)  |
| Peru        | Venomous animal contact                         | 0 (0 to 0)  | 0 (0 to 0) | -9.3% (-14% to -4.6%)     |
| Philippines | Adverse effects of medical treatment            | 0 (0 to 0)  | 0 (0 to 0) | 0% (0% to 0%)             |
| Philippines | Conflict and terrorism                          | 1 (0 to 4)  | 0 (0 to 1) | NA                        |
| Philippines | Cyclist road injuries                           | 0 (0 to 0)  | 0 (0 to 0) | -10.1% (-14.6% to -5.7%)  |
| Philippines | Drowning                                        | 0 (0 to 0)  | 0 (0 to 0) | -37.2% (-40.7% to -33.5%) |
| Philippines | Environmental heat and cold exposure            | 0 (0 to 0)  | 0 (0 to 0) | -9.2% (-11.1% to -7.5%)   |
| Philippines | Executions and police conflict                  | 0 (0 to 0)  | 0 (0 to 0) | NA                        |

|             |                                                 |            |            |                           |
|-------------|-------------------------------------------------|------------|------------|---------------------------|
| Philippines | Exposure to forces of nature                    | 2 (1 to 4) | 0 (0 to 0) | NA                        |
| Philippines | Falls                                           | 1 (1 to 2) | 2 (1 to 2) | 24.3% (21.5% to 26.8%)    |
| Philippines | Fire, heat, and hot substances                  | 0 (0 to 0) | 0 (0 to 0) | -3.8% (-6.6% to -1.7%)    |
| Philippines | Foreign body in eyes                            | 0 (0 to 0) | 0 (0 to 0) | 0% (0% to 0%)             |
| Philippines | Foreign body in other body part                 | 0 (0 to 0) | 0 (0 to 0) | -7.1% (-9.7% to -4.5%)    |
| Philippines | Motor vehicle road injuries                     | 0 (0 to 1) | 0 (0 to 1) | -5.5% (-9.5% to -2.2%)    |
| Philippines | Motorcyclist road injuries                      | 0 (0 to 1) | 0 (0 to 1) | 19.6% (15% to 25.3%)      |
| Philippines | Non-venomous animal contact                     | 0 (0 to 0) | 0 (0 to 0) | -11.2% (-13.5% to -8.5%)  |
| Philippines | Other exposure to mechanical forces             | 0 (0 to 0) | 0 (0 to 0) | -15.3% (-25.2% to -6.8%)  |
| Philippines | Other road injuries                             | 0 (0 to 0) | 0 (0 to 0) | -13.2% (-17.2% to -8.9%)  |
| Philippines | Other transport injuries                        | 0 (0 to 0) | 0 (0 to 0) | -8% (-10.2% to -5.8%)     |
| Philippines | Other unintentional injuries                    | 0 (0 to 0) | 0 (0 to 0) | -14.5% (-16.7% to -12.6%) |
| Philippines | Pedestrian road injuries                        | 0 (0 to 0) | 0 (0 to 0) | -21.6% (-25% to -18.2%)   |
| Philippines | Physical violence by firearm                    | 0 (0 to 0) | 0 (0 to 0) | -5.4% (-10.6% to 0.7%)    |
| Philippines | Physical violence by other means                | 0 (0 to 1) | 0 (0 to 1) | -27% (-30.8% to -23.4%)   |
| Philippines | Physical violence by sharp object               | 1 (0 to 1) | 0 (0 to 1) | -24.3% (-27.5% to -21.3%) |
| Philippines | Poisoning by carbon monoxide                    | 0 (0 to 0) | 0 (0 to 0) | 14.9% (11% to 19.3%)      |
| Philippines | Poisoning by other means                        | 0 (0 to 0) | 0 (0 to 0) | 15.1% (10.6% to 19.8%)    |
| Philippines | Pulmonary aspiration and foreign body in airway | 0 (0 to 0) | 0 (0 to 0) | -33.6% (-36.3% to -30.3%) |
| Philippines | Self-harm by firearm                            | 0 (0 to 0) | 0 (0 to 0) | -11% (-20.5% to -1.3%)    |
| Philippines | Self-harm by other specified means              | 0 (0 to 0) | 0 (0 to 0) | -10.9% (-12.3% to -9.4%)  |
| Philippines | Unintentional firearm injuries                  | 0 (0 to 0) | 0 (0 to 0) | 43.3% (29.5% to 59.6%)    |
| Philippines | Venomous animal contact                         | 0 (0 to 0) | 0 (0 to 0) | -44.6% (-48.8% to -41.4%) |
| Poland      | Adverse effects of medical treatment            | 0 (0 to 0) | 0 (0 to 0) | 0% (0% to 0%)             |
| Poland      | Conflict and terrorism                          | 0 (0 to 0) | 0 (0 to 0) | NA                        |
| Poland      | Cyclist road injuries                           | 1 (0 to 1) | 1 (0 to 1) | -17.7% (-21.5% to -13.1%) |
| Poland      | Drowning                                        | 0 (0 to 0) | 0 (0 to 0) | -7.6% (-17.2% to 2.2%)    |
| Poland      | Environmental heat and cold exposure            | 0 (0 to 0) | 0 (0 to 0) | -61.1% (-69.6% to -51.1%) |
| Poland      | Executions and police conflict                  | 0 (0 to 0) | 0 (0 to 0) | NA                        |
| Poland      | Exposure to forces of nature                    | 0 (0 to 0) | 0 (0 to 0) | NA                        |
| Poland      | Falls                                           | 6 (4 to 9) | 7 (5 to 9) | 10.8% (7.1% to 14.7%)     |
| Poland      | Fire, heat, and hot substances                  | 0 (0 to 0) | 0 (0 to 0) | -11.9% (-14.7% to -8.9%)  |
| Poland      | Foreign body in eyes                            | 0 (0 to 0) | 0 (0 to 0) | 0% (0% to 0%)             |
| Poland      | Foreign body in other body part                 | 0 (0 to 1) | 0 (0 to 1) | -6.3% (-8.2% to -4.6%)    |
| Poland      | Motor vehicle road injuries                     | 2 (1 to 3) | 2 (1 to 3) | -16.2% (-20.2% to -11.6%) |
| Poland      | Motorcyclist road injuries                      | 0 (0 to 1) | 0 (0 to 1) | -24.3% (-28.8% to -19.3%) |
| Poland      | Non-venomous animal contact                     | 0 (0 to 0) | 0 (0 to 0) | -22.8% (-24.5% to -21.3%) |
| Poland      | Other exposure to mechanical forces             | 2 (1 to 3) | 1 (1 to 3) | -11.3% (-14.4% to -8.1%)  |
| Poland      | Other road injuries                             | 0 (0 to 0) | 0 (0 to 0) | -42.6% (-49.2% to -36.7%) |
| Poland      | Other transport injuries                        | 0 (0 to 0) | 0 (0 to 0) | -31.6% (-34.5% to -29.1%) |
| Poland      | Other unintentional injuries                    | 1 (0 to 1) | 0 (0 to 0) | -38.7% (-43.1% to -34.6%) |
| Poland      | Pedestrian road injuries                        | 1 (0 to 1) | 0 (0 to 1) | -62% (-64.7% to -59.4%)   |
| Poland      | Physical violence by firearm                    | 0 (0 to 0) | 0 (0 to 0) | 49.4% (36.7% to 64.9%)    |

|             |                                                 |            |            |                           |
|-------------|-------------------------------------------------|------------|------------|---------------------------|
| Poland      | Physical violence by other means                | 0 (0 to 1) | 0 (0 to 1) | -30.3% (-35.3% to -25.2%) |
| Poland      | Physical violence by sharp object               | 0 (0 to 0) | 0 (0 to 0) | -41.9% (-48.8% to -34.4%) |
| Poland      | Poisoning by carbon monoxide                    | 0 (0 to 0) | 0 (0 to 0) | -7.2% (-19.8% to 5.5%)    |
| Poland      | Poisoning by other means                        | 0 (0 to 0) | 0 (0 to 0) | -21.4% (-30.7% to -11.2%) |
| Poland      | Pulmonary aspiration and foreign body in airway | 0 (0 to 0) | 0 (0 to 0) | -32.4% (-38.1% to -27.3%) |
| Poland      | Self-harm by firearm                            | 0 (0 to 0) | 0 (0 to 0) | 5.1% (0.3% to 11.5%)      |
| Poland      | Self-harm by other specified means              | 0 (0 to 1) | 0 (0 to 1) | -4.5% (-7.6% to -1.2%)    |
| Poland      | Unintentional firearm injuries                  | 0 (0 to 0) | 0 (0 to 0) | 1.7% (-2.4% to 5.7%)      |
| Poland      | Venomous animal contact                         | 0 (0 to 0) | 0 (0 to 0) | -19.7% (-21.5% to -17.7%) |
| Portugal    | Adverse effects of medical treatment            | 0 (0 to 0) | 0 (0 to 0) | 0% (0% to 0%)             |
| Portugal    | Conflict and terrorism                          | 0 (0 to 0) | 0 (0 to 0) | NA                        |
| Portugal    | Cyclist road injuries                           | 0 (0 to 1) | 0 (0 to 0) | -52.9% (-59.8% to -45.2%) |
| Portugal    | Drowning                                        | 0 (0 to 0) | 0 (0 to 0) | 53% (34.2% to 73.4%)      |
| Portugal    | Environmental heat and cold exposure            | 0 (0 to 0) | 0 (0 to 0) | -4.1% (-8.6% to 0.9%)     |
| Portugal    | Executions and police conflict                  | 0 (0 to 0) | 0 (0 to 0) | NA                        |
| Portugal    | Exposure to forces of nature                    | 0 (0 to 0) | 0 (0 to 0) | NA                        |
| Portugal    | Falls                                           | 4 (3 to 5) | 4 (3 to 5) | -9.8% (-15.5% to -4.4%)   |
| Portugal    | Fire, heat, and hot substances                  | 0 (0 to 0) | 0 (0 to 0) | -17.2% (-23.4% to -11.7%) |
| Portugal    | Foreign body in eyes                            | 0 (0 to 0) | 0 (0 to 0) | 0% (0% to 0%)             |
| Portugal    | Foreign body in other body part                 | 0 (0 to 0) | 0 (0 to 0) | 7.5% (1.5% to 12.6%)      |
| Portugal    | Motor vehicle road injuries                     | 1 (0 to 1) | 0 (0 to 0) | -60.8% (-67.3% to -54%)   |
| Portugal    | Motorcyclist road injuries                      | 0 (0 to 0) | 0 (0 to 0) | -26.5% (-39.6% to -11.8%) |
| Portugal    | Non-venomous animal contact                     | 0 (0 to 0) | 0 (0 to 0) | -3.7% (-8.6% to 1.7%)     |
| Portugal    | Other exposure to mechanical forces             | 1 (0 to 1) | 0 (0 to 1) | -29.3% (-38.7% to -20.4%) |
| Portugal    | Other road injuries                             | 0 (0 to 0) | 0 (0 to 0) | -40.2% (-50.4% to -30.1%) |
| Portugal    | Other transport injuries                        | 0 (0 to 0) | 0 (0 to 0) | 2.3% (-3.9% to 8.7%)      |
| Portugal    | Other unintentional injuries                    | 0 (0 to 0) | 0 (0 to 0) | -27.9% (-33.7% to -22.4%) |
| Portugal    | Pedestrian road injuries                        | 0 (0 to 1) | 0 (0 to 0) | -84.9% (-88.1% to -81.1%) |
| Portugal    | Physical violence by firearm                    | 0 (0 to 0) | 0 (0 to 0) | 12.2% (-4.3% to 34%)      |
| Portugal    | Physical violence by other means                | 0 (0 to 0) | 0 (0 to 0) | -45.7% (-53.5% to -38.3%) |
| Portugal    | Physical violence by sharp object               | 0 (0 to 0) | 0 (0 to 0) | -30.5% (-41.4% to -18.6%) |
| Portugal    | Poisoning by carbon monoxide                    | 0 (0 to 0) | 0 (0 to 0) | 37.3% (26.3% to 49.5%)    |
| Portugal    | Poisoning by other means                        | 0 (0 to 0) | 0 (0 to 0) | -8.2% (-14.3% to -1.4%)   |
| Portugal    | Pulmonary aspiration and foreign body in airway | 0 (0 to 0) | 0 (0 to 0) | -24.6% (-32.4% to -15.8%) |
| Portugal    | Self-harm by firearm                            | 0 (0 to 0) | 0 (0 to 0) | 7.2% (-6.7% to 26.8%)     |
| Portugal    | Self-harm by other specified means              | 0 (0 to 0) | 0 (0 to 0) | -33.1% (-38% to -28%)     |
| Portugal    | Unintentional firearm injuries                  | 0 (0 to 0) | 0 (0 to 0) | -23% (-34% to -12.8%)     |
| Portugal    | Venomous animal contact                         | 0 (0 to 0) | 0 (0 to 0) | -3% (-9.8% to 5.4%)       |
| Puerto Rico | Adverse effects of medical treatment            | 0 (0 to 0) | 0 (0 to 0) | 0% (0% to 0%)             |
| Puerto Rico | Conflict and terrorism                          | 0 (0 to 0) | 0 (0 to 0) | NA                        |
| Puerto Rico | Cyclist road injuries                           | 1 (0 to 2) | 1 (0 to 1) | -23.4% (-32.9% to -12.7%) |
| Puerto Rico | Drowning                                        | 0 (0 to 0) | 0 (0 to 0) | 64.7% (45.4% to 85.6%)    |
| Puerto Rico | Environmental heat and cold exposure            | 0 (0 to 0) | 0 (0 to 0) | 3.4% (-0.9% to 7.3%)      |



|             |                                                 |            |             |                           |
|-------------|-------------------------------------------------|------------|-------------|---------------------------|
| Puerto Rico | Executions and police conflict                  | 0 (0 to 0) | 0 (0 to 0)  | NA                        |
| Puerto Rico | Exposure to forces of nature                    | 0 (0 to 0) | 0 (0 to 0)  | NA                        |
| Puerto Rico | Falls                                           | 6 (4 to 8) | 8 (5 to 11) | 36.8% (31.9% to 42%)      |
| Puerto Rico | Fire, heat, and hot substances                  | 0 (0 to 0) | 0 (0 to 0)  | 1.1% (-4.7% to 7.2%)      |
| Puerto Rico | Foreign body in eyes                            | 0 (0 to 0) | 0 (0 to 0)  | 0% (0% to 0%)             |
| Puerto Rico | Foreign body in other body part                 | 0 (0 to 0) | 0 (0 to 0)  | 3.4% (-1.1% to 8.3%)      |
| Puerto Rico | Motor vehicle road injuries                     | 1 (1 to 3) | 1 (0 to 1)  | -49.4% (-56.7% to -41.7%) |
| Puerto Rico | Motorcyclist road injuries                      | 1 (0 to 1) | 1 (0 to 1)  | 33.9% (14.3% to 59%)      |
| Puerto Rico | Non-venomous animal contact                     | 0 (0 to 0) | 0 (0 to 0)  | -9.6% (-14% to -5.3%)     |
| Puerto Rico | Other exposure to mechanical forces             | 0 (0 to 1) | 1 (0 to 1)  | 15.6% (9.9% to 20.6%)     |
| Puerto Rico | Other road injuries                             | 0 (0 to 0) | 0 (0 to 0)  | -20% (-30.1% to -7.4%)    |
| Puerto Rico | Other transport injuries                        | 0 (0 to 0) | 0 (0 to 0)  | 0.1% (-5.5% to 6%)        |
| Puerto Rico | Other unintentional injuries                    | 0 (0 to 1) | 0 (0 to 1)  | -5.3% (-11.6% to -0.3%)   |
| Puerto Rico | Pedestrian road injuries                        | 1 (1 to 2) | 1 (0 to 1)  | -48.2% (-54.8% to -40.9%) |
| Puerto Rico | Physical violence by firearm                    | 0 (0 to 0) | 0 (0 to 1)  | 25.8% (3.3% to 60.7%)     |
| Puerto Rico | Physical violence by other means                | 0 (0 to 1) | 0 (0 to 0)  | -18.3% (-28% to -7.2%)    |
| Puerto Rico | Physical violence by sharp object               | 0 (0 to 0) | 0 (0 to 0)  | -26.3% (-37.9% to -12.4%) |
| Puerto Rico | Poisoning by carbon monoxide                    | 0 (0 to 0) | 0 (0 to 0)  | -18.5% (-32% to -5.5%)    |
| Puerto Rico | Poisoning by other means                        | 0 (0 to 0) | 0 (0 to 0)  | -41.4% (-51.1% to -32%)   |
| Puerto Rico | Pulmonary aspiration and foreign body in airway | 0 (0 to 0) | 0 (0 to 0)  | -17.4% (-24.1% to -8.3%)  |
| Puerto Rico | Self-harm by firearm                            | 0 (0 to 0) | 0 (0 to 0)  | -32.7% (-43.6% to -23.3%) |
| Puerto Rico | Self-harm by other specified means              | 0 (0 to 0) | 0 (0 to 0)  | -17.1% (-25% to -8.8%)    |
| Puerto Rico | Unintentional firearm injuries                  | 0 (0 to 0) | 0 (0 to 0)  | 15.8% (4.6% to 27.3%)     |
| Puerto Rico | Venomous animal contact                         | 0 (0 to 0) | 0 (0 to 0)  | -9.4% (-15% to -3.9%)     |
| Qatar       | Adverse effects of medical treatment            | 0 (0 to 0) | 0 (0 to 0)  | 0% (0% to 0%)             |
| Qatar       | Conflict and terrorism                          | 0 (0 to 0) | 0 (0 to 0)  | NA                        |
| Qatar       | Cyclist road injuries                           | 0 (0 to 0) | 0 (0 to 0)  | -35.3% (-42.6% to -27.1%) |
| Qatar       | Drowning                                        | 0 (0 to 0) | 0 (0 to 0)  | 80.9% (54.1% to 109.8%)   |
| Qatar       | Environmental heat and cold exposure            | 0 (0 to 0) | 0 (0 to 0)  | -6.3% (-11.8% to -0.9%)   |
| Qatar       | Executions and police conflict                  | 0 (0 to 0) | 0 (0 to 0)  | NA                        |
| Qatar       | Exposure to forces of nature                    | 0 (0 to 0) | 0 (0 to 0)  | NA                        |
| Qatar       | Falls                                           | 3 (2 to 4) | 4 (3 to 5)  | 24.3% (18.5% to 30.3%)    |
| Qatar       | Fire, heat, and hot substances                  | 0 (0 to 0) | 0 (0 to 0)  | -33% (-39.3% to -26.3%)   |
| Qatar       | Foreign body in eyes                            | 0 (0 to 0) | 0 (0 to 0)  | 0% (0% to 0%)             |
| Qatar       | Foreign body in other body part                 | 0 (0 to 0) | 0 (0 to 0)  | 0.7% (-2.9% to 4.9%)      |
| Qatar       | Motor vehicle road injuries                     | 1 (1 to 2) | 1 (0 to 1)  | -30.9% (-36.8% to -24.6%) |
| Qatar       | Motorcyclist road injuries                      | 0 (0 to 0) | 0 (0 to 0)  | -30.3% (-38.7% to -20.1%) |
| Qatar       | Non-venomous animal contact                     | 0 (0 to 0) | 0 (0 to 0)  | -1.2% (-6% to 4.2%)       |
| Qatar       | Other exposure to mechanical forces             | 1 (0 to 1) | 0 (0 to 1)  | -27.1% (-33.5% to -21.6%) |
| Qatar       | Other road injuries                             | 0 (0 to 0) | 0 (0 to 0)  | -14.1% (-24.2% to -2.8%)  |
| Qatar       | Other transport injuries                        | 0 (0 to 0) | 0 (0 to 0)  | -22% (-28.4% to -15.7%)   |
| Qatar       | Other unintentional injuries                    | 0 (0 to 0) | 0 (0 to 0)  | -13.9% (-19.2% to -8.3%)  |
| Qatar       | Pedestrian road injuries                        | 0 (0 to 1) | 0 (0 to 0)  | -40.8% (-47.1% to -33%)   |

|                     |                                                 |            |            |                           |
|---------------------|-------------------------------------------------|------------|------------|---------------------------|
| Qatar               | Physical violence by firearm                    | 0 (0 to 0) | 0 (0 to 0) | 126.5% (94% to 169.6%)    |
| Qatar               | Physical violence by other means                | 0 (0 to 0) | 0 (0 to 0) | -2.2% (-12.8% to 6.2%)    |
| Qatar               | Physical violence by sharp object               | 0 (0 to 0) | 0 (0 to 0) | 3.1% (-8.4% to 16%)       |
| Qatar               | Poisoning by carbon monoxide                    | 0 (0 to 0) | 0 (0 to 0) | 38.3% (25.3% to 53.8%)    |
| Qatar               | Poisoning by other means                        | 0 (0 to 0) | 0 (0 to 0) | -9.4% (-15.6% to -2.8%)   |
| Qatar               | Pulmonary aspiration and foreign body in airway | 0 (0 to 0) | 0 (0 to 0) | -18.7% (-28.1% to -7.3%)  |
| Qatar               | Self-harm by firearm                            | 0 (0 to 0) | 0 (0 to 0) | 33.7% (17% to 56.8%)      |
| Qatar               | Self-harm by other specified means              | 0 (0 to 0) | 0 (0 to 0) | -4.7% (-11.9% to 2.5%)    |
| Qatar               | Unintentional firearm injuries                  | 0 (0 to 0) | 0 (0 to 0) | -1.8% (-10.9% to 9.3%)    |
| Qatar               | Venomous animal contact                         | 0 (0 to 0) | 0 (0 to 0) | -1.7% (-8.1% to 6.5%)     |
| Republic of Korea   | Adverse effects of medical treatment            | 0 (0 to 0) | 0 (0 to 0) | 0% (0% to 0%)             |
| Republic of Korea   | Conflict and terrorism                          | 0 (0 to 0) | 0 (0 to 0) | NA                        |
| Republic of Korea   | Cyclist road injuries                           | 0 (0 to 1) | 0 (0 to 0) | -41.4% (-49.3% to -32.3%) |
| Republic of Korea   | Drowning                                        | 0 (0 to 0) | 0 (0 to 0) | 153.6% (124.1% to 187.2%) |
| Republic of Korea   | Environmental heat and cold exposure            | 0 (0 to 0) | 0 (0 to 0) | -8.8% (-14% to -3.7%)     |
| Republic of Korea   | Executions and police conflict                  | 0 (0 to 0) | 0 (0 to 0) | NA                        |
| Republic of Korea   | Exposure to forces of nature                    | 0 (0 to 0) | 0 (0 to 0) | NA                        |
| Republic of Korea   | Falls                                           | 5 (3 to 6) | 5 (4 to 7) | 15.2% (8.7% to 21.5%)     |
| Republic of Korea   | Fire, heat, and hot substances                  | 0 (0 to 0) | 0 (0 to 0) | -15% (-22.7% to -8.1%)    |
| Republic of Korea   | Foreign body in eyes                            | 0 (0 to 0) | 0 (0 to 0) | 0% (0% to 0%)             |
| Republic of Korea   | Foreign body in other body part                 | 0 (0 to 1) | 0 (0 to 1) | 9.3% (5.9% to 12.9%)      |
| Republic of Korea   | Motor vehicle road injuries                     | 1 (0 to 1) | 0 (0 to 1) | -46.3% (-52.8% to -38.4%) |
| Republic of Korea   | Motorcyclist road injuries                      | 0 (0 to 1) | 0 (0 to 0) | -51.4% (-58.8% to -42.9%) |
| Republic of Korea   | Non-venomous animal contact                     | 0 (0 to 0) | 0 (0 to 0) | -9.3% (-13.4% to -4.7%)   |
| Republic of Korea   | Other exposure to mechanical forces             | 1 (0 to 2) | 1 (0 to 2) | -2.8% (-11.6% to 5.7%)    |
| Republic of Korea   | Other road injuries                             | 0 (0 to 0) | 0 (0 to 0) | -32.2% (-43.4% to -19.6%) |
| Republic of Korea   | Other transport injuries                        | 0 (0 to 1) | 0 (0 to 0) | -32% (-38.4% to -24.6%)   |
| Republic of Korea   | Other unintentional injuries                    | 1 (0 to 1) | 0 (0 to 1) | -30.3% (-37.3% to -23.2%) |
| Republic of Korea   | Pedestrian road injuries                        | 0 (0 to 0) | 0 (0 to 0) | -60.6% (-65.7% to -55.2%) |
| Republic of Korea   | Physical violence by firearm                    | 0 (0 to 0) | 0 (0 to 0) | 90.4% (61.5% to 128.6%)   |
| Republic of Korea   | Physical violence by other means                | 0 (0 to 0) | 0 (0 to 0) | -13.8% (-24% to -3.9%)    |
| Republic of Korea   | Physical violence by sharp object               | 0 (0 to 0) | 0 (0 to 0) | -39.9% (-51% to -29.5%)   |
| Republic of Korea   | Poisoning by carbon monoxide                    | 0 (0 to 0) | 0 (0 to 0) | -27.7% (-39.7% to -13.9%) |
| Republic of Korea   | Poisoning by other means                        | 0 (0 to 0) | 0 (0 to 0) | -26.1% (-35.7% to -15.8%) |
| Republic of Korea   | Pulmonary aspiration and foreign body in airway | 0 (0 to 0) | 0 (0 to 0) | -41.6% (-48.1% to -35.1%) |
| Republic of Korea   | Self-harm by firearm                            | 0 (0 to 0) | 0 (0 to 0) | 74.3% (40% to 112.5%)     |
| Republic of Korea   | Self-harm by other specified means              | 0 (0 to 1) | 1 (0 to 1) | 83.3% (69.5% to 96.3%)    |
| Republic of Korea   | Unintentional firearm injuries                  | 0 (0 to 0) | 0 (0 to 0) | 19.6% (7.7% to 34.9%)     |
| Republic of Korea   | Venomous animal contact                         | 0 (0 to 0) | 0 (0 to 0) | -17.6% (-23.4% to -12%)   |
| Republic of Moldova | Adverse effects of medical treatment            | 0 (0 to 0) | 0 (0 to 0) | 0% (0% to 0%)             |
| Republic of Moldova | Conflict and terrorism                          | 0 (0 to 0) | 0 (0 to 0) | NA                        |
| Republic of Moldova | Cyclist road injuries                           | 1 (0 to 1) | 0 (0 to 1) | -36.7% (-43.6% to -29%)   |
| Republic of Moldova | Drowning                                        | 0 (0 to 0) | 0 (0 to 0) | 19.1% (7.5% to 31%)       |

|                     |                                                 |            |            |                           |
|---------------------|-------------------------------------------------|------------|------------|---------------------------|
| Republic of Moldova | Environmental heat and cold exposure            | 0 (0 to 0) | 0 (0 to 1) | 18% (9.3% to 28.4%)       |
| Republic of Moldova | Executions and police conflict                  | 0 (0 to 0) | 0 (0 to 0) | NA                        |
| Republic of Moldova | Exposure to forces of nature                    | 0 (0 to 0) | 0 (0 to 0) | NA                        |
| Republic of Moldova | Falls                                           | 5 (4 to 6) | 4 (3 to 6) | -13.6% (-18.1% to -8%)    |
| Republic of Moldova | Fire, heat, and hot substances                  | 0 (0 to 0) | 0 (0 to 0) | -27.6% (-34% to -21%)     |
| Republic of Moldova | Foreign body in eyes                            | 0 (0 to 0) | 0 (0 to 0) | 0% (0% to 0%)             |
| Republic of Moldova | Foreign body in other body part                 | 0 (0 to 0) | 0 (0 to 0) | 0.9% (-2.8% to 5.2%)      |
| Republic of Moldova | Motor vehicle road injuries                     | 2 (1 to 4) | 1 (1 to 2) | -32.5% (-39.8% to -24.3%) |
| Republic of Moldova | Motorcyclist road injuries                      | 0 (0 to 1) | 0 (0 to 0) | -51% (-59.1% to -41.7%)   |
| Republic of Moldova | Non-venomous animal contact                     | 0 (0 to 0) | 0 (0 to 0) | 0.7% (-3.4% to 4.6%)      |
| Republic of Moldova | Other exposure to mechanical forces             | 1 (0 to 2) | 1 (0 to 1) | -19% (-26.7% to -11.7%)   |
| Republic of Moldova | Other road injuries                             | 0 (0 to 0) | 0 (0 to 0) | -41.6% (-49% to -33.5%)   |
| Republic of Moldova | Other transport injuries                        | 0 (0 to 0) | 0 (0 to 0) | -23.1% (-29.1% to -16.8%) |
| Republic of Moldova | Other unintentional injuries                    | 0 (0 to 1) | 0 (0 to 0) | -41.6% (-47% to -34.7%)   |
| Republic of Moldova | Pedestrian road injuries                        | 1 (0 to 1) | 0 (0 to 1) | -56.6% (-62.2% to -51.1%) |
| Republic of Moldova | Physical violence by firearm                    | 0 (0 to 0) | 0 (0 to 0) | 11.2% (-12.5% to 37.3%)   |
| Republic of Moldova | Physical violence by other means                | 1 (0 to 1) | 0 (0 to 1) | -46.5% (-53.2% to -38.5%) |
| Republic of Moldova | Physical violence by sharp object               | 0 (0 to 0) | 0 (0 to 0) | -33.2% (-43.4% to -20.6%) |
| Republic of Moldova | Poisoning by carbon monoxide                    | 0 (0 to 0) | 0 (0 to 0) | -0.9% (-9% to 8.3%)       |
| Republic of Moldova | Poisoning by other means                        | 0 (0 to 0) | 0 (0 to 0) | -27.2% (-35.3% to -18.6%) |
| Republic of Moldova | Pulmonary aspiration and foreign body in airway | 0 (0 to 0) | 0 (0 to 0) | -4% (-10.5% to 4.1%)      |
| Republic of Moldova | Self-harm by firearm                            | 0 (0 to 0) | 0 (0 to 0) | -6.2% (-17.9% to 9.2%)    |
| Republic of Moldova | Self-harm by other specified means              | 0 (0 to 1) | 0 (0 to 0) | -16.9% (-21.9% to -10.8%) |
| Republic of Moldova | Unintentional firearm injuries                  | 0 (0 to 0) | 0 (0 to 0) | -18.2% (-28.9% to -7.9%)  |
| Republic of Moldova | Venomous animal contact                         | 0 (0 to 0) | 0 (0 to 0) | 6.4% (0.5% to 13%)        |
| Romania             | Adverse effects of medical treatment            | 0 (0 to 0) | 0 (0 to 0) | 0% (0% to 0%)             |
| Romania             | Conflict and terrorism                          | 0 (0 to 1) | 0 (0 to 0) | NA                        |
| Romania             | Cyclist road injuries                           | 1 (0 to 1) | 0 (0 to 1) | -16.3% (-25.5% to -5.1%)  |
| Romania             | Drowning                                        | 0 (0 to 0) | 0 (0 to 0) | 41.1% (24.3% to 59.5%)    |
| Romania             | Environmental heat and cold exposure            | 0 (0 to 0) | 0 (0 to 0) | -15.3% (-20.1% to -11%)   |
| Romania             | Executions and police conflict                  | 0 (0 to 0) | 0 (0 to 0) | NA                        |
| Romania             | Exposure to forces of nature                    | 0 (0 to 0) | 0 (0 to 0) | NA                        |
| Romania             | Falls                                           | 6 (5 to 8) | 6 (4 to 8) | -9.8% (-15.3% to -3.9%)   |
| Romania             | Fire, heat, and hot substances                  | 0 (0 to 0) | 0 (0 to 0) | -24.9% (-30.2% to -19.8%) |
| Romania             | Foreign body in eyes                            | 0 (0 to 0) | 0 (0 to 0) | 0% (0% to 0%)             |
| Romania             | Foreign body in other body part                 | 0 (0 to 0) | 0 (0 to 0) | 0.9% (-3.3% to 5.3%)      |
| Romania             | Motor vehicle road injuries                     | 1 (1 to 3) | 1 (1 to 2) | -18.5% (-26.6% to -9.1%)  |
| Romania             | Motorcyclist road injuries                      | 0 (0 to 0) | 0 (0 to 0) | -23.4% (-35% to -10.6%)   |
| Romania             | Non-venomous animal contact                     | 0 (0 to 0) | 0 (0 to 0) | -12.6% (-16% to -8.7%)    |
| Romania             | Other exposure to mechanical forces             | 2 (1 to 3) | 2 (1 to 3) | -12.7% (-19.2% to -6%)    |
| Romania             | Other road injuries                             | 0 (0 to 0) | 0 (0 to 0) | -29.5% (-38.9% to -20%)   |
| Romania             | Other transport injuries                        | 0 (0 to 0) | 0 (0 to 0) | -12.7% (-17.6% to -7.6%)  |
| Romania             | Other unintentional injuries                    | 0 (0 to 1) | 0 (0 to 0) | -16.7% (-23.5% to -9.6%)  |

|                    |                                                 |              |            |                           |
|--------------------|-------------------------------------------------|--------------|------------|---------------------------|
| Romania            | Pedestrian road injuries                        | 0 (0 to 1)   | 0 (0 to 0) | -48.4% (-55.1% to -40.7%) |
| Romania            | Physical violence by firearm                    | 0 (0 to 0)   | 0 (0 to 0) | 104.3% (77.2% to 137.5%)  |
| Romania            | Physical violence by other means                | 0 (0 to 1)   | 0 (0 to 1) | -35.9% (-44.9% to -24.9%) |
| Romania            | Physical violence by sharp object               | 0 (0 to 0)   | 0 (0 to 0) | -41.3% (-52.1% to -30.5%) |
| Romania            | Poisoning by carbon monoxide                    | 0 (0 to 0)   | 0 (0 to 0) | -4.7% (-19.9% to 11.7%)   |
| Romania            | Poisoning by other means                        | 0 (0 to 0)   | 0 (0 to 0) | -49.5% (-59.2% to -39.9%) |
| Romania            | Pulmonary aspiration and foreign body in airway | 0 (0 to 0)   | 0 (0 to 0) | -20.7% (-28.5% to -13.3%) |
| Romania            | Self-harm by firearm                            | 0 (0 to 0)   | 0 (0 to 0) | 36% (17.1% to 63.1%)      |
| Romania            | Self-harm by other specified means              | 0 (0 to 0)   | 0 (0 to 0) | 6.8% (1% to 13.1%)        |
| Romania            | Unintentional firearm injuries                  | 0 (0 to 0)   | 0 (0 to 0) | 1.3% (-9.3% to 13%)       |
| Romania            | Venomous animal contact                         | 0 (0 to 0)   | 0 (0 to 0) | -17.3% (-21.7% to -12.9%) |
| Russian Federation | Adverse effects of medical treatment            | 0 (0 to 0)   | 0 (0 to 0) | 0% (0% to 0%)             |
| Russian Federation | Conflict and terrorism                          | 0 (0 to 0)   | 0 (0 to 0) | NA                        |
| Russian Federation | Cyclist road injuries                           | 1 (0 to 1)   | 1 (0 to 1) | -19.3% (-23.6% to -14.6%) |
| Russian Federation | Drowning                                        | 0 (0 to 0)   | 0 (0 to 0) | -49.1% (-51.9% to -46.1%) |
| Russian Federation | Environmental heat and cold exposure            | 1 (0 to 1)   | 0 (0 to 1) | -43.8% (-47.1% to -40.1%) |
| Russian Federation | Executions and police conflict                  | 0 (0 to 0)   | 0 (0 to 0) | NA                        |
| Russian Federation | Exposure to forces of nature                    | 0 (0 to 0)   | 0 (0 to 0) | NA                        |
| Russian Federation | Falls                                           | 5 (4 to 7)   | 6 (4 to 8) | 7.1% (4.4% to 9.5%)       |
| Russian Federation | Fire, heat, and hot substances                  | 0 (0 to 0)   | 0 (0 to 0) | -24% (-26.9% to -21.8%)   |
| Russian Federation | Foreign body in eyes                            | 0 (0 to 0)   | 0 (0 to 0) | 0% (0% to 0%)             |
| Russian Federation | Foreign body in other body part                 | 0 (0 to 0)   | 0 (0 to 0) | -0.1% (-0.9% to 0.8%)     |
| Russian Federation | Motor vehicle road injuries                     | 3 (2 to 5)   | 3 (1 to 5) | -14.5% (-17.9% to -9.9%)  |
| Russian Federation | Motorcyclist road injuries                      | 0 (0 to 1)   | 0 (0 to 0) | -26.5% (-30.6% to -22.2%) |
| Russian Federation | Non-venomous animal contact                     | 0 (0 to 0)   | 0 (0 to 0) | -10.6% (-12.9% to -8.6%)  |
| Russian Federation | Other exposure to mechanical forces             | 1 (1 to 3)   | 1 (0 to 2) | -33.1% (-36.5% to -30.3%) |
| Russian Federation | Other road injuries                             | 0 (0 to 0)   | 0 (0 to 0) | -15.1% (-20.2% to -9.6%)  |
| Russian Federation | Other transport injuries                        | 0 (0 to 0)   | 0 (0 to 0) | -2.6% (-4.1% to -1%)      |
| Russian Federation | Other unintentional injuries                    | 0 (0 to 1)   | 0 (0 to 0) | -23.3% (-26.1% to -20.3%) |
| Russian Federation | Pedestrian road injuries                        | 1 (1 to 2)   | 1 (0 to 1) | -58.6% (-61.2% to -55.9%) |
| Russian Federation | Physical violence by firearm                    | 0 (0 to 0)   | 0 (0 to 0) | -17.2% (-25.9% to -8.7%)  |
| Russian Federation | Physical violence by other means                | 1 (0 to 1)   | 1 (0 to 1) | -32.3% (-34.5% to -29.5%) |
| Russian Federation | Physical violence by sharp object               | 0 (0 to 1)   | 0 (0 to 0) | -46.5% (-50.2% to -42.9%) |
| Russian Federation | Poisoning by carbon monoxide                    | 0 (0 to 0)   | 0 (0 to 0) | -30.5% (-34.7% to -25.7%) |
| Russian Federation | Poisoning by other means                        | 0 (0 to 0)   | 0 (0 to 0) | -28.7% (-33.8% to -23.7%) |
| Russian Federation | Pulmonary aspiration and foreign body in airway | 0 (0 to 0)   | 0 (0 to 0) | -7.8% (-11% to -4.2%)     |
| Russian Federation | Self-harm by firearm                            | 0 (0 to 0)   | 0 (0 to 0) | -25.3% (-30.4% to -19.7%) |
| Russian Federation | Self-harm by other specified means              | 1 (0 to 1)   | 1 (0 to 1) | -20.8% (-23% to -18.5%)   |
| Russian Federation | Unintentional firearm injuries                  | 0 (0 to 0)   | 0 (0 to 0) | -22.8% (-29.4% to -17.1%) |
| Russian Federation | Venomous animal contact                         | 0 (0 to 0)   | 0 (0 to 0) | -7.6% (-10.1% to -5.4%)   |
| Rwanda             | Adverse effects of medical treatment            | 0 (0 to 0)   | 0 (0 to 0) | 0% (0% to 0%)             |
| Rwanda             | Conflict and terrorism                          | 11 (2 to 34) | 0 (0 to 0) | NA                        |
| Rwanda             | Cyclist road injuries                           | 3 (1 to 5)   | 2 (1 to 4) | -28% (-33.5% to -22.6%)   |

|                       |                                                 |            |            |                           |
|-----------------------|-------------------------------------------------|------------|------------|---------------------------|
| Rwanda                | Drowning                                        | 0 (0 to 0) | 0 (0 to 0) | -13.5% (-21.7% to -4.5%)  |
| Rwanda                | Environmental heat and cold exposure            | 0 (0 to 0) | 0 (0 to 0) | -13.1% (-19.6% to -6.9%)  |
| Rwanda                | Executions and police conflict                  | 0 (0 to 0) | 0 (0 to 0) | NA                        |
| Rwanda                | Exposure to forces of nature                    | 0 (0 to 0) | 0 (0 to 0) | NA                        |
| Rwanda                | Falls                                           | 3 (2 to 5) | 4 (3 to 6) | 27% (22.2% to 31.8%)      |
| Rwanda                | Fire, heat, and hot substances                  | 0 (0 to 0) | 0 (0 to 0) | -22.5% (-28.4% to -16.8%) |
| Rwanda                | Foreign body in eyes                            | 0 (0 to 0) | 0 (0 to 0) | 0% (0% to 0%)             |
| Rwanda                | Foreign body in other body part                 | 1 (0 to 1) | 1 (0 to 1) | -2.9% (-7.1% to 2.4%)     |
| Rwanda                | Motor vehicle road injuries                     | 1 (0 to 2) | 1 (0 to 2) | -18.6% (-25.8% to -9.7%)  |
| Rwanda                | Motorcyclist road injuries                      | 1 (1 to 3) | 1 (1 to 2) | -17.7% (-23.9% to -11.2%) |
| Rwanda                | Non-venomous animal contact                     | 0 (0 to 1) | 0 (0 to 1) | -25.5% (-29.6% to -20.9%) |
| Rwanda                | Other exposure to mechanical forces             | 0 (0 to 0) | 0 (0 to 0) | -11.5% (-18.3% to -4.9%)  |
| Rwanda                | Other road injuries                             | 0 (0 to 0) | 0 (0 to 0) | -6.7% (-15% to 2.8%)      |
| Rwanda                | Other transport injuries                        | 1 (0 to 1) | 0 (0 to 1) | -28.8% (-33.7% to -23.2%) |
| Rwanda                | Other unintentional injuries                    | 0 (0 to 1) | 0 (0 to 0) | -23.5% (-29.1% to -17.5%) |
| Rwanda                | Pedestrian road injuries                        | 3 (1 to 6) | 2 (1 to 4) | -29.4% (-34.6% to -24.1%) |
| Rwanda                | Physical violence by firearm                    | 0 (0 to 0) | 0 (0 to 0) | 7.7% (-9.8% to 28.8%)     |
| Rwanda                | Physical violence by other means                | 0 (0 to 0) | 0 (0 to 0) | -29.3% (-34.6% to -23.9%) |
| Rwanda                | Physical violence by sharp object               | 0 (0 to 0) | 0 (0 to 0) | -18.5% (-25.8% to -10.1%) |
| Rwanda                | Poisoning by carbon monoxide                    | 0 (0 to 0) | 0 (0 to 0) | 18.7% (5.5% to 34.5%)     |
| Rwanda                | Poisoning by other means                        | 0 (0 to 0) | 0 (0 to 0) | -26.5% (-33.9% to -17.2%) |
| Rwanda                | Pulmonary aspiration and foreign body in airway | 0 (0 to 0) | 0 (0 to 0) | -15.9% (-25.9% to -5.7%)  |
| Rwanda                | Self-harm by firearm                            | 0 (0 to 0) | 0 (0 to 0) | -0.7% (-13.5% to 17.2%)   |
| Rwanda                | Self-harm by other specified means              | 0 (0 to 0) | 0 (0 to 0) | -35.2% (-39.6% to -31%)   |
| Rwanda                | Unintentional firearm injuries                  | 0 (0 to 0) | 0 (0 to 0) | -26.6% (-35.2% to -18.4%) |
| Rwanda                | Venomous animal contact                         | 0 (0 to 0) | 0 (0 to 0) | -33% (-40.5% to -25.3%)   |
| Saint Kitts and Nevis | Adverse effects of medical treatment            | 0 (0 to 0) | 0 (0 to 0) | 0% (0% to 0%)             |
| Saint Kitts and Nevis | Conflict and terrorism                          | 0 (0 to 0) | 0 (0 to 0) | NA                        |
| Saint Kitts and Nevis | Cyclist road injuries                           | 1 (0 to 2) | 1 (0 to 1) | -17.5% (-28.2% to -6.4%)  |
| Saint Kitts and Nevis | Drowning                                        | 0 (0 to 0) | 0 (0 to 0) | 30.5% (16.3% to 43.4%)    |
| Saint Kitts and Nevis | Environmental heat and cold exposure            | 0 (0 to 0) | 0 (0 to 0) | 2% (-1.7% to 6%)          |
| Saint Kitts and Nevis | Executions and police conflict                  | 0 (0 to 0) | 0 (0 to 0) | NA                        |
| Saint Kitts and Nevis | Exposure to forces of nature                    | 0 (0 to 0) | 0 (0 to 0) | NA                        |
| Saint Kitts and Nevis | Falls                                           | 5 (3 to 7) | 6 (4 to 9) | 29.4% (24.3% to 33.9%)    |
| Saint Kitts and Nevis | Fire, heat, and hot substances                  | 1 (0 to 1) | 0 (0 to 1) | -34.4% (-39.8% to -29%)   |
| Saint Kitts and Nevis | Foreign body in eyes                            | 0 (0 to 0) | 0 (0 to 0) | 0% (0% to 0%)             |
| Saint Kitts and Nevis | Foreign body in other body part                 | 0 (0 to 1) | 0 (0 to 0) | -1.5% (-5.6% to 3.6%)     |
| Saint Kitts and Nevis | Motor vehicle road injuries                     | 1 (0 to 2) | 1 (0 to 1) | -27.9% (-37% to -17.2%)   |
| Saint Kitts and Nevis | Motorcyclist road injuries                      | 1 (0 to 1) | 1 (0 to 1) | 18.8% (3.7% to 39.4%)     |
| Saint Kitts and Nevis | Non-venomous animal contact                     | 0 (0 to 0) | 0 (0 to 0) | -4.5% (-10% to 2%)        |
| Saint Kitts and Nevis | Other exposure to mechanical forces             | 1 (0 to 1) | 1 (0 to 1) | 8% (-0.9% to 17%)         |
| Saint Kitts and Nevis | Other road injuries                             | 0 (0 to 0) | 0 (0 to 0) | -1.6% (-14.7% to 13.7%)   |
| Saint Kitts and Nevis | Other transport injuries                        | 0 (0 to 0) | 0 (0 to 0) | 4.7% (-0.4% to 9.8%)      |

|                                  |                                                 |            |            |                           |
|----------------------------------|-------------------------------------------------|------------|------------|---------------------------|
| Saint Kitts and Nevis            | Other unintentional injuries                    | 0 (0 to 1) | 0 (0 to 1) | -9.3% (-14.6% to -4.2%)   |
| Saint Kitts and Nevis            | Pedestrian road injuries                        | 1 (0 to 1) | 1 (0 to 1) | -34.4% (-43% to -25.7%)   |
| Saint Kitts and Nevis            | Physical violence by firearm                    | 0 (0 to 0) | 0 (0 to 0) | 241.3% (170.5% to 355.1%) |
| Saint Kitts and Nevis            | Physical violence by other means                | 0 (0 to 0) | 0 (0 to 0) | 19.4% (2.5% to 38.1%)     |
| Saint Kitts and Nevis            | Physical violence by sharp object               | 0 (0 to 0) | 0 (0 to 0) | 38.3% (14.5% to 67.2%)    |
| Saint Kitts and Nevis            | Poisoning by carbon monoxide                    | 0 (0 to 0) | 0 (0 to 0) | 19.6% (5.4% to 35.1%)     |
| Saint Kitts and Nevis            | Poisoning by other means                        | 0 (0 to 0) | 0 (0 to 0) | -6.1% (-16.4% to 3.1%)    |
| Saint Kitts and Nevis            | Pulmonary aspiration and foreign body in airway | 0 (0 to 0) | 0 (0 to 0) | -12.1% (-20.3% to -3.9%)  |
| Saint Kitts and Nevis            | Self-harm by firearm                            | 0 (0 to 0) | 0 (0 to 0) | 19.6% (2% to 44.9%)       |
| Saint Kitts and Nevis            | Self-harm by other specified means              | 0 (0 to 0) | 0 (0 to 0) | -16.5% (-28.4% to -2.5%)  |
| Saint Kitts and Nevis            | Unintentional firearm injuries                  | 0 (0 to 1) | 0 (0 to 0) | -16.6% (-28.3% to -6.3%)  |
| Saint Kitts and Nevis            | Venomous animal contact                         | 0 (0 to 0) | 0 (0 to 0) | -4.6% (-11% to 3.1%)      |
| Saint Lucia                      | Adverse effects of medical treatment            | 0 (0 to 0) | 0 (0 to 0) | 0% (0% to 0%)             |
| Saint Lucia                      | Conflict and terrorism                          | 0 (0 to 1) | 0 (0 to 0) | NA                        |
| Saint Lucia                      | Cyclist road injuries                           | 0 (0 to 1) | 0 (0 to 0) | -22.7% (-32% to -12.6%)   |
| Saint Lucia                      | Drowning                                        | 0 (0 to 0) | 0 (0 to 0) | 32.7% (17.6% to 49.7%)    |
| Saint Lucia                      | Environmental heat and cold exposure            | 0 (0 to 0) | 0 (0 to 0) | 5.6% (1.9% to 9.6%)       |
| Saint Lucia                      | Executions and police conflict                  | 0 (0 to 0) | 0 (0 to 0) | NA                        |
| Saint Lucia                      | Exposure to forces of nature                    | 0 (0 to 0) | 0 (0 to 0) | NA                        |
| Saint Lucia                      | Falls                                           | 1 (1 to 1) | 1 (1 to 2) | 45.6% (40.2% to 50.8%)    |
| Saint Lucia                      | Fire, heat, and hot substances                  | 0 (0 to 0) | 0 (0 to 0) | -15.4% (-21.4% to -9%)    |
| Saint Lucia                      | Foreign body in eyes                            | 0 (0 to 0) | 0 (0 to 0) | 0% (0% to 0%)             |
| Saint Lucia                      | Foreign body in other body part                 | 0 (0 to 0) | 0 (0 to 0) | 1.5% (-2.3% to 6%)        |
| Saint Lucia                      | Motor vehicle road injuries                     | 1 (0 to 1) | 1 (0 to 1) | -24% (-32.3% to -15.7%)   |
| Saint Lucia                      | Motorcyclist road injuries                      | 0 (0 to 0) | 0 (0 to 0) | 34.7% (16.9% to 58%)      |
| Saint Lucia                      | Non-venomous animal contact                     | 0 (0 to 0) | 0 (0 to 0) | -0.7% (-6.3% to 5.6%)     |
| Saint Lucia                      | Other exposure to mechanical forces             | 0 (0 to 1) | 0 (0 to 1) | 23.7% (16.3% to 32.5%)    |
| Saint Lucia                      | Other road injuries                             | 0 (0 to 0) | 0 (0 to 0) | -6.1% (-16.4% to 6%)      |
| Saint Lucia                      | Other transport injuries                        | 0 (0 to 0) | 0 (0 to 0) | 19.6% (13% to 26.4%)      |
| Saint Lucia                      | Other unintentional injuries                    | 0 (0 to 0) | 0 (0 to 0) | -6.6% (-11.4% to -1.6%)   |
| Saint Lucia                      | Pedestrian road injuries                        | 0 (0 to 0) | 0 (0 to 0) | -33.7% (-41.1% to -25.3%) |
| Saint Lucia                      | Physical violence by firearm                    | 0 (0 to 0) | 0 (0 to 0) | 166.1% (119.3% to 228.7%) |
| Saint Lucia                      | Physical violence by other means                | 0 (0 to 0) | 0 (0 to 0) | 8% (-3.8% to 20.7%)       |
| Saint Lucia                      | Physical violence by sharp object               | 0 (0 to 0) | 0 (0 to 0) | 17.3% (0.1% to 34.8%)     |
| Saint Lucia                      | Poisoning by carbon monoxide                    | 0 (0 to 0) | 0 (0 to 0) | 14.3% (0.6% to 30.4%)     |
| Saint Lucia                      | Poisoning by other means                        | 0 (0 to 0) | 0 (0 to 0) | -6.4% (-16.5% to 3.6%)    |
| Saint Lucia                      | Pulmonary aspiration and foreign body in airway | 0 (0 to 0) | 0 (0 to 0) | -20.5% (-26.9% to -13.5%) |
| Saint Lucia                      | Self-harm by firearm                            | 0 (0 to 0) | 0 (0 to 0) | 8.3% (-3.5% to 24.1%)     |
| Saint Lucia                      | Self-harm by other specified means              | 0 (0 to 0) | 0 (0 to 0) | -6.9% (-14.6% to 0.5%)    |
| Saint Lucia                      | Unintentional firearm injuries                  | 0 (0 to 0) | 0 (0 to 0) | 15.9% (6.9% to 24.9%)     |
| Saint Lucia                      | Venomous animal contact                         | 0 (0 to 0) | 0 (0 to 0) | 0.2% (-5.9% to 6.8%)      |
| Saint Vincent and the Grenadines | Adverse effects of medical treatment            | 0 (0 to 0) | 0 (0 to 0) | 0% (0% to 0%)             |
| Saint Vincent and the Grenadines | Conflict and terrorism                          | 0 (0 to 0) | 0 (0 to 0) | NA                        |



|                                  |                                                 |            |            |                           |
|----------------------------------|-------------------------------------------------|------------|------------|---------------------------|
| Saint Vincent and the Grenadines | Cyclist road injuries                           | 0 (0 to 0) | 0 (0 to 0) | -17.9% (-25.8% to -9.1%)  |
| Saint Vincent and the Grenadines | Drowning                                        | 0 (0 to 0) | 0 (0 to 0) | 10.7% (1.1% to 20.9%)     |
| Saint Vincent and the Grenadines | Environmental heat and cold exposure            | 0 (0 to 1) | 0 (0 to 1) | 5.5% (1.7% to 9.7%)       |
| Saint Vincent and the Grenadines | Executions and police conflict                  | 0 (0 to 0) | 0 (0 to 0) | NA                        |
| Saint Vincent and the Grenadines | Exposure to forces of nature                    | 0 (0 to 0) | 0 (0 to 0) | NA                        |
| Saint Vincent and the Grenadines | Falls                                           | 1 (1 to 2) | 2 (1 to 2) | 46.4% (41% to 51.4%)      |
| Saint Vincent and the Grenadines | Fire, heat, and hot substances                  | 0 (0 to 0) | 0 (0 to 0) | -19.4% (-24.5% to -13.8%) |
| Saint Vincent and the Grenadines | Foreign body in eyes                            | 0 (0 to 0) | 0 (0 to 0) | 0% (0% to 0%)             |
| Saint Vincent and the Grenadines | Foreign body in other body part                 | 0 (0 to 0) | 0 (0 to 0) | -26.1% (-30.3% to -21.8%) |
| Saint Vincent and the Grenadines | Motor vehicle road injuries                     | 0 (0 to 1) | 0 (0 to 1) | -4.7% (-13% to 5.7%)      |
| Saint Vincent and the Grenadines | Motorcyclist road injuries                      | 0 (0 to 0) | 0 (0 to 0) | 16.5% (4.6% to 31.7%)     |
| Saint Vincent and the Grenadines | Non-venomous animal contact                     | 0 (0 to 0) | 0 (0 to 0) | 5% (-2% to 13.4%)         |
| Saint Vincent and the Grenadines | Other exposure to mechanical forces             | 0 (0 to 1) | 0 (0 to 1) | 28.8% (18.8% to 40.2%)    |
| Saint Vincent and the Grenadines | Other road injuries                             | 0 (0 to 0) | 0 (0 to 0) | -7.2% (-17.5% to 3.3%)    |
| Saint Vincent and the Grenadines | Other transport injuries                        | 0 (0 to 0) | 0 (0 to 0) | 7% (2.1% to 12.5%)        |
| Saint Vincent and the Grenadines | Other unintentional injuries                    | 0 (0 to 0) | 0 (0 to 0) | -3.3% (-7.8% to 1.2%)     |
| Saint Vincent and the Grenadines | Pedestrian road injuries                        | 0 (0 to 0) | 0 (0 to 0) | -49.2% (-55.8% to -42.6%) |
| Saint Vincent and the Grenadines | Physical violence by firearm                    | 0 (0 to 0) | 0 (0 to 0) | 86.5% (60.5% to 123.9%)   |
| Saint Vincent and the Grenadines | Physical violence by other means                | 0 (0 to 0) | 0 (0 to 0) | -1.3% (-12.2% to 10.2%)   |
| Saint Vincent and the Grenadines | Physical violence by sharp object               | 0 (0 to 0) | 0 (0 to 0) | 61.6% (42.2% to 87.7%)    |
| Saint Vincent and the Grenadines | Poisoning by carbon monoxide                    | 0 (0 to 0) | 0 (0 to 0) | 14.4% (0.2% to 30.4%)     |
| Saint Vincent and the Grenadines | Poisoning by other means                        | 0 (0 to 0) | 0 (0 to 0) | 4.2% (-5.9% to 13.8%)     |
| Saint Vincent and the Grenadines | Pulmonary aspiration and foreign body in airway | 0 (0 to 0) | 0 (0 to 0) | -16.3% (-22.9% to -8.7%)  |
| Saint Vincent and the Grenadines | Self-harm by firearm                            | 0 (0 to 0) | 0 (0 to 0) | 12.5% (0.5% to 28.9%)     |
| Saint Vincent and the Grenadines | Self-harm by other specified means              | 0 (0 to 0) | 0 (0 to 0) | -13.1% (-20.3% to -6.1%)  |
| Saint Vincent and the Grenadines | Unintentional firearm injuries                  | 0 (0 to 0) | 0 (0 to 0) | 4.4% (-6.3% to 13.8%)     |
| Saint Vincent and the Grenadines | Venomous animal contact                         | 0 (0 to 0) | 0 (0 to 0) | -3.2% (-9.8% to 3.7%)     |
| Samoa                            | Adverse effects of medical treatment            | 0 (0 to 0) | 0 (0 to 0) | 0% (0% to 0%)             |
| Samoa                            | Conflict and terrorism                          | 0 (0 to 0) | 0 (0 to 0) | NA                        |
| Samoa                            | Cyclist road injuries                           | 0 (0 to 0) | 0 (0 to 0) | 4% (-3.4% to 12.4%)       |
| Samoa                            | Drowning                                        | 0 (0 to 0) | 0 (0 to 0) | 17.2% (8.1% to 27.1%)     |
| Samoa                            | Environmental heat and cold exposure            | 0 (0 to 0) | 0 (0 to 0) | 0.1% (-4.9% to 4.8%)      |
| Samoa                            | Executions and police conflict                  | 0 (0 to 0) | 0 (0 to 0) | NA                        |
| Samoa                            | Exposure to forces of nature                    | 2 (1 to 3) | 0 (0 to 0) | NA                        |
| Samoa                            | Falls                                           | 1 (1 to 2) | 2 (1 to 2) | 45.7% (40.5% to 51.5%)    |
| Samoa                            | Fire, heat, and hot substances                  | 0 (0 to 0) | 0 (0 to 0) | 5.7% (-0.4% to 12.4%)     |
| Samoa                            | Foreign body in eyes                            | 0 (0 to 0) | 0 (0 to 0) | 0% (0% to 0%)             |
| Samoa                            | Foreign body in other body part                 | 0 (0 to 0) | 0 (0 to 0) | -2.2% (-6.8% to 1.5%)     |
| Samoa                            | Motor vehicle road injuries                     | 1 (0 to 1) | 1 (0 to 1) | -2.7% (-9.7% to 4.5%)     |
| Samoa                            | Motorcyclist road injuries                      | 0 (0 to 0) | 0 (0 to 0) | 19.2% (8.9% to 31.7%)     |
| Samoa                            | Non-venomous animal contact                     | 0 (0 to 0) | 0 (0 to 0) | -14.5% (-18.2% to -10.8%) |
| Samoa                            | Other exposure to mechanical forces             | 0 (0 to 0) | 0 (0 to 0) | -10.9% (-17.2% to -4.7%)  |
| Samoa                            | Other road injuries                             | 0 (0 to 0) | 0 (0 to 0) | 1.7% (-7.6% to 13%)       |

|                       |                                                 |              |               |                           |
|-----------------------|-------------------------------------------------|--------------|---------------|---------------------------|
| Samoa                 | Other transport injuries                        | 0 (0 to 0)   | 0 (0 to 0)    | -3.3% (-7.5% to 0.8%)     |
| Samoa                 | Other unintentional injuries                    | 0 (0 to 0)   | 0 (0 to 0)    | -2% (-6.4% to 2.6%)       |
| Samoa                 | Pedestrian road injuries                        | 0 (0 to 0)   | 0 (0 to 0)    | 13.4% (3.8% to 23.5%)     |
| Samoa                 | Physical violence by firearm                    | 0 (0 to 0)   | 0 (0 to 0)    | 1.6% (-9.8% to 13.9%)     |
| Samoa                 | Physical violence by other means                | 0 (0 to 1)   | 1 (0 to 1)    | 4.8% (-1.9% to 12.2%)     |
| Samoa                 | Physical violence by sharp object               | 0 (0 to 0)   | 0 (0 to 0)    | -20.1% (-28.5% to -12.8%) |
| Samoa                 | Poisoning by carbon monoxide                    | 0 (0 to 0)   | 0 (0 to 0)    | 14.8% (4.6% to 25.5%)     |
| Samoa                 | Poisoning by other means                        | 0 (0 to 0)   | 0 (0 to 0)    | -12% (-18.3% to -5.6%)    |
| Samoa                 | Pulmonary aspiration and foreign body in airway | 0 (0 to 0)   | 0 (0 to 0)    | -5.1% (-13.8% to 5.2%)    |
| Samoa                 | Self-harm by firearm                            | 0 (0 to 0)   | 0 (0 to 0)    | -7.7% (-22.2% to 8.6%)    |
| Samoa                 | Self-harm by other specified means              | 0 (0 to 0)   | 0 (0 to 0)    | -3.1% (-8.4% to 2.6%)     |
| Samoa                 | Unintentional firearm injuries                  | 0 (0 to 0)   | 0 (0 to 0)    | -16.7% (-23.8% to -10.6%) |
| Samoa                 | Venomous animal contact                         | 0 (0 to 0)   | 0 (0 to 0)    | -11.7% (-17.1% to -5.7%)  |
| San Marino            | Adverse effects of medical treatment            | 0 (0 to 0)   | 0 (0 to 0)    | 0% (0% to 0%)             |
| San Marino            | Conflict and terrorism                          | 0 (0 to 0)   | 0 (0 to 0)    | NA                        |
| San Marino            | Cyclist road injuries                           | 1 (0 to 1)   | 1 (0 to 1)    | -26.9% (-33.1% to -19.7%) |
| San Marino            | Drowning                                        | 0 (0 to 0)   | 0 (0 to 0)    | 67.1% (55.5% to 82.1%)    |
| San Marino            | Environmental heat and cold exposure            | 0 (0 to 0)   | 0 (0 to 0)    | -3.8% (-8.2% to 0.8%)     |
| San Marino            | Executions and police conflict                  | 0 (0 to 0)   | 0 (0 to 0)    | NA                        |
| San Marino            | Exposure to forces of nature                    | 0 (0 to 0)   | 0 (0 to 0)    | NA                        |
| San Marino            | Falls                                           | 12 (8 to 17) | 15 (10 to 21) | 21% (16.8% to 24.8%)      |
| San Marino            | Fire, heat, and hot substances                  | 0 (0 to 0)   | 0 (0 to 0)    | 2.9% (-0.8% to 7.1%)      |
| San Marino            | Foreign body in eyes                            | 0 (0 to 0)   | 0 (0 to 0)    | 0% (0% to 0%)             |
| San Marino            | Foreign body in other body part                 | 0 (0 to 1)   | 0 (0 to 1)    | 0.5% (-3.3% to 5.3%)      |
| San Marino            | Motor vehicle road injuries                     | 1 (0 to 2)   | 1 (0 to 1)    | -25.3% (-31.8% to -18%)   |
| San Marino            | Motorcyclist road injuries                      | 1 (0 to 2)   | 1 (0 to 1)    | -19.8% (-28% to -11.2%)   |
| San Marino            | Non-venomous animal contact                     | 0 (0 to 0)   | 0 (0 to 0)    | -4.2% (-8% to -0.5%)      |
| San Marino            | Other exposure to mechanical forces             | 1 (0 to 2)   | 1 (0 to 1)    | -7.8% (-12.7% to -3.2%)   |
| San Marino            | Other road injuries                             | 0 (0 to 0)   | 0 (0 to 0)    | -4.8% (-14.3% to 7.5%)    |
| San Marino            | Other transport injuries                        | 0 (0 to 0)   | 0 (0 to 0)    | 7.6% (3.2% to 11.8%)      |
| San Marino            | Other unintentional injuries                    | 1 (1 to 1)   | 1 (0 to 1)    | -8.3% (-12.1% to -4.9%)   |
| San Marino            | Pedestrian road injuries                        | 0 (0 to 1)   | 0 (0 to 0)    | -25.8% (-33% to -18.4%)   |
| San Marino            | Physical violence by firearm                    | 0 (0 to 0)   | 0 (0 to 0)    | 24% (14.9% to 35.8%)      |
| San Marino            | Physical violence by other means                | 0 (0 to 0)   | 0 (0 to 0)    | 0.8% (-4.3% to 6%)        |
| San Marino            | Physical violence by sharp object               | 0 (0 to 0)   | 0 (0 to 0)    | -2.5% (-10.5% to 5.9%)    |
| San Marino            | Poisoning by carbon monoxide                    | 0 (0 to 0)   | 0 (0 to 0)    | 28.1% (19% to 37.7%)      |
| San Marino            | Poisoning by other means                        | 0 (0 to 0)   | 0 (0 to 0)    | -13% (-17.3% to -7.3%)    |
| San Marino            | Pulmonary aspiration and foreign body in airway | 0 (0 to 0)   | 0 (0 to 0)    | -3.4% (-9.7% to 3.8%)     |
| San Marino            | Self-harm by firearm                            | 0 (0 to 0)   | 0 (0 to 0)    | -7.5% (-17% to 2.9%)      |
| San Marino            | Self-harm by other specified means              | 0 (0 to 0)   | 0 (0 to 0)    | -0.9% (-5.8% to 3.4%)     |
| San Marino            | Unintentional firearm injuries                  | 0 (0 to 0)   | 0 (0 to 0)    | 6.9% (-0.8% to 15%)       |
| San Marino            | Venomous animal contact                         | 0 (0 to 0)   | 0 (0 to 0)    | -6.2% (-12.8% to 0.5%)    |
| Sao Tome and Principe | Adverse effects of medical treatment            | 0 (0 to 0)   | 0 (0 to 0)    | 0% (0% to 0%)             |

|                       |                                                 |            |             |                          |
|-----------------------|-------------------------------------------------|------------|-------------|--------------------------|
| Sao Tome and Principe | Conflict and terrorism                          | 0 (0 to 0) | 0 (0 to 0)  | NA                       |
| Sao Tome and Principe | Cyclist road injuries                           | 1 (0 to 2) | 1 (1 to 2)  | 25.5% (16.7% to 35.7%)   |
| Sao Tome and Principe | Drowning                                        | 0 (0 to 0) | 0 (0 to 0)  | 23.7% (12.8% to 36.8%)   |
| Sao Tome and Principe | Environmental heat and cold exposure            | 0 (0 to 0) | 0 (0 to 0)  | 3.9% (-1.3% to 9.4%)     |
| Sao Tome and Principe | Executions and police conflict                  | 0 (0 to 0) | 0 (0 to 0)  | NA                       |
| Sao Tome and Principe | Exposure to forces of nature                    | 0 (0 to 0) | 0 (0 to 0)  | NA                       |
| Sao Tome and Principe | Falls                                           | 4 (3 to 6) | 6 (4 to 8)  | 37.6% (33% to 42.6%)     |
| Sao Tome and Principe | Fire, heat, and hot substances                  | 0 (0 to 0) | 0 (0 to 0)  | 5.7% (0.7% to 11.3%)     |
| Sao Tome and Principe | Foreign body in eyes                            | 0 (0 to 0) | 0 (0 to 0)  | 0% (0% to 0%)            |
| Sao Tome and Principe | Foreign body in other body part                 | 1 (0 to 1) | 1 (0 to 1)  | 0% (-4% to 4.1%)         |
| Sao Tome and Principe | Motor vehicle road injuries                     | 1 (1 to 2) | 2 (1 to 3)  | 30.8% (22.1% to 40.9%)   |
| Sao Tome and Principe | Motorcyclist road injuries                      | 0 (0 to 1) | 1 (0 to 1)  | 23.9% (14% to 35.4%)     |
| Sao Tome and Principe | Non-venomous animal contact                     | 0 (0 to 0) | 0 (0 to 0)  | 1.8% (-1.7% to 5.9%)     |
| Sao Tome and Principe | Other exposure to mechanical forces             | 0 (0 to 0) | 0 (0 to 0)  | -7.9% (-13.6% to -2.8%)  |
| Sao Tome and Principe | Other road injuries                             | 0 (0 to 0) | 0 (0 to 0)  | 13.7% (5% to 23.6%)      |
| Sao Tome and Principe | Other transport injuries                        | 0 (0 to 1) | 0 (0 to 1)  | 2.4% (-2.3% to 7%)       |
| Sao Tome and Principe | Other unintentional injuries                    | 0 (0 to 0) | 0 (0 to 0)  | -7.5% (-13.6% to -2%)    |
| Sao Tome and Principe | Pedestrian road injuries                        | 1 (1 to 3) | 2 (1 to 3)  | 16% (8.6% to 24.2%)      |
| Sao Tome and Principe | Physical violence by firearm                    | 0 (0 to 0) | 0 (0 to 0)  | 63.4% (44.9% to 88%)     |
| Sao Tome and Principe | Physical violence by other means                | 0 (0 to 0) | 0 (0 to 0)  | 9.7% (3% to 16.8%)       |
| Sao Tome and Principe | Physical violence by sharp object               | 0 (0 to 0) | 0 (0 to 0)  | 10.2% (1.9% to 19.2%)    |
| Sao Tome and Principe | Poisoning by carbon monoxide                    | 0 (0 to 0) | 0 (0 to 0)  | 25.8% (11.6% to 41.1%)   |
| Sao Tome and Principe | Poisoning by other means                        | 0 (0 to 0) | 0 (0 to 0)  | -8.3% (-16.1% to 0.1%)   |
| Sao Tome and Principe | Pulmonary aspiration and foreign body in airway | 0 (0 to 0) | 0 (0 to 0)  | -3.1% (-13.7% to 7.4%)   |
| Sao Tome and Principe | Self-harm by firearm                            | 0 (0 to 0) | 0 (0 to 0)  | 40.4% (29.9% to 54.6%)   |
| Sao Tome and Principe | Self-harm by other specified means              | 0 (0 to 0) | 0 (0 to 0)  | 36.4% (29.9% to 45.5%)   |
| Sao Tome and Principe | Unintentional firearm injuries                  | 0 (0 to 0) | 0 (0 to 0)  | -9.8% (-17.7% to -2.6%)  |
| Sao Tome and Principe | Venomous animal contact                         | 0 (0 to 0) | 0 (0 to 0)  | 3% (-3.2% to 10.3%)      |
| Saudi Arabia          | Adverse effects of medical treatment            | 0 (0 to 0) | 0 (0 to 0)  | 0% (0% to 0%)            |
| Saudi Arabia          | Conflict and terrorism                          | 0 (0 to 0) | 0 (0 to 0)  | NA                       |
| Saudi Arabia          | Cyclist road injuries                           | 0 (0 to 0) | 0 (0 to 0)  | -9.3% (-17.9% to 0.6%)   |
| Saudi Arabia          | Drowning                                        | 0 (0 to 0) | 0 (0 to 0)  | 123.2% (97.1% to 150.2%) |
| Saudi Arabia          | Environmental heat and cold exposure            | 0 (0 to 0) | 0 (0 to 0)  | 2.9% (-1.3% to 6.9%)     |
| Saudi Arabia          | Executions and police conflict                  | 0 (0 to 0) | 0 (0 to 0)  | NA                       |
| Saudi Arabia          | Exposure to forces of nature                    | 0 (0 to 0) | 0 (0 to 0)  | NA                       |
| Saudi Arabia          | Falls                                           | 5 (4 to 7) | 8 (6 to 10) | 58.3% (52.5% to 64.8%)   |
| Saudi Arabia          | Fire, heat, and hot substances                  | 0 (0 to 0) | 0 (0 to 0)  | 0.6% (-5.5% to 6.9%)     |
| Saudi Arabia          | Foreign body in eyes                            | 0 (0 to 0) | 0 (0 to 0)  | 0% (0% to 0%)            |
| Saudi Arabia          | Foreign body in other body part                 | 0 (0 to 0) | 0 (0 to 0)  | -1% (-4.7% to 2.6%)      |
| Saudi Arabia          | Motor vehicle road injuries                     | 1 (1 to 2) | 1 (1 to 2)  | 14.5% (5.5% to 23.6%)    |
| Saudi Arabia          | Motorcyclist road injuries                      | 0 (0 to 0) | 0 (0 to 0)  | 19.6% (5% to 37.4%)      |
| Saudi Arabia          | Non-venomous animal contact                     | 0 (0 to 0) | 0 (0 to 0)  | -0.2% (-4.6% to 4.5%)    |
| Saudi Arabia          | Other exposure to mechanical forces             | 0 (0 to 1) | 0 (0 to 1)  | -6.4% (-12.7% to 0.9%)   |

|              |                                                 |            |            |                           |
|--------------|-------------------------------------------------|------------|------------|---------------------------|
| Saudi Arabia | Other road injuries                             | 0 (0 to 0) | 0 (0 to 0) | -1.8% (-12.7% to 9.8%)    |
| Saudi Arabia | Other transport injuries                        | 0 (0 to 0) | 0 (0 to 0) | 13.2% (7.3% to 19.5%)     |
| Saudi Arabia | Other unintentional injuries                    | 1 (0 to 1) | 0 (0 to 1) | -32.8% (-36.8% to -28.5%) |
| Saudi Arabia | Pedestrian road injuries                        | 0 (0 to 1) | 0 (0 to 1) | -14.6% (-23.7% to -4.6%)  |
| Saudi Arabia | Physical violence by firearm                    | 0 (0 to 0) | 0 (0 to 0) | 79.1% (52.8% to 117.1%)   |
| Saudi Arabia | Physical violence by other means                | 0 (0 to 0) | 0 (0 to 0) | 12.8% (3% to 25%)         |
| Saudi Arabia | Physical violence by sharp object               | 0 (0 to 0) | 0 (0 to 0) | -27.7% (-36.8% to -19.2%) |
| Saudi Arabia | Poisoning by carbon monoxide                    | 0 (0 to 0) | 0 (0 to 0) | 50.5% (33.4% to 70.2%)    |
| Saudi Arabia | Poisoning by other means                        | 0 (0 to 0) | 0 (0 to 0) | -17.6% (-25.4% to -10%)   |
| Saudi Arabia | Pulmonary aspiration and foreign body in airway | 0 (0 to 0) | 0 (0 to 0) | 4.4% (-3.5% to 14.6%)     |
| Saudi Arabia | Self-harm by firearm                            | 0 (0 to 0) | 0 (0 to 0) | 69.9% (50.3% to 92.4%)    |
| Saudi Arabia | Self-harm by other specified means              | 0 (0 to 0) | 0 (0 to 0) | 90% (75.9% to 105.3%)     |
| Saudi Arabia | Unintentional firearm injuries                  | 0 (0 to 0) | 0 (0 to 0) | -30% (-37.8% to -23.1%)   |
| Saudi Arabia | Venomous animal contact                         | 0 (0 to 0) | 0 (0 to 0) | 3.1% (-4.3% to 11%)       |
| Senegal      | Adverse effects of medical treatment            | 0 (0 to 0) | 0 (0 to 0) | 0% (0% to 0%)             |
| Senegal      | Conflict and terrorism                          | 0 (0 to 1) | 0 (0 to 0) | NA                        |
| Senegal      | Cyclist road injuries                           | 1 (0 to 2) | 1 (1 to 2) | 15% (7.4% to 23.6%)       |
| Senegal      | Drowning                                        | 0 (0 to 0) | 0 (0 to 0) | -5.4% (-12.8% to 2.4%)    |
| Senegal      | Environmental heat and cold exposure            | 0 (0 to 0) | 0 (0 to 0) | -1.9% (-6.9% to 3.6%)     |
| Senegal      | Executions and police conflict                  | 0 (0 to 0) | 0 (0 to 0) | NA                        |
| Senegal      | Exposure to forces of nature                    | 0 (0 to 0) | 0 (0 to 0) | NA                        |
| Senegal      | Falls                                           | 3 (2 to 4) | 3 (2 to 5) | 20.3% (16.2% to 24.8%)    |
| Senegal      | Fire, heat, and hot substances                  | 0 (0 to 0) | 0 (0 to 0) | -7.8% (-13.4% to -2.8%)   |
| Senegal      | Foreign body in eyes                            | 0 (0 to 0) | 0 (0 to 0) | 0% (0% to 0%)             |
| Senegal      | Foreign body in other body part                 | 1 (0 to 1) | 1 (0 to 1) | -0.2% (-3.3% to 3.4%)     |
| Senegal      | Motor vehicle road injuries                     | 2 (1 to 3) | 2 (1 to 4) | 18.5% (10.1% to 27.8%)    |
| Senegal      | Motorcyclist road injuries                      | 0 (0 to 1) | 0 (0 to 1) | 8.9% (0.7% to 18%)        |
| Senegal      | Non-venomous animal contact                     | 0 (0 to 0) | 0 (0 to 0) | -10.5% (-14.3% to -6.2%)  |
| Senegal      | Other exposure to mechanical forces             | 0 (0 to 0) | 0 (0 to 0) | -6.4% (-11.6% to -1.6%)   |
| Senegal      | Other road injuries                             | 0 (0 to 0) | 0 (0 to 0) | 12.3% (3% to 21.9%)       |
| Senegal      | Other transport injuries                        | 0 (0 to 0) | 0 (0 to 0) | -9.2% (-14% to -5%)       |
| Senegal      | Other unintentional injuries                    | 0 (0 to 0) | 0 (0 to 0) | -11.7% (-16.2% to -6.6%)  |
| Senegal      | Pedestrian road injuries                        | 2 (1 to 4) | 2 (1 to 3) | -10% (-15.7% to -4.2%)    |
| Senegal      | Physical violence by firearm                    | 0 (0 to 0) | 0 (0 to 0) | 51.3% (29.8% to 78.9%)    |
| Senegal      | Physical violence by other means                | 0 (0 to 0) | 0 (0 to 0) | 4.1% (-1.6% to 10.1%)     |
| Senegal      | Physical violence by sharp object               | 0 (0 to 0) | 0 (0 to 0) | 4.5% (-2.6% to 11.6%)     |
| Senegal      | Poisoning by carbon monoxide                    | 0 (0 to 0) | 0 (0 to 0) | 15.5% (1.4% to 30.4%)     |
| Senegal      | Poisoning by other means                        | 0 (0 to 0) | 0 (0 to 0) | -15.5% (-21.8% to -9%)    |
| Senegal      | Pulmonary aspiration and foreign body in airway | 0 (0 to 0) | 0 (0 to 0) | -5.2% (-12.6% to 2.8%)    |
| Senegal      | Self-harm by firearm                            | 0 (0 to 0) | 0 (0 to 0) | 15.5% (3.1% to 28.4%)     |
| Senegal      | Self-harm by other specified means              | 0 (0 to 0) | 0 (0 to 0) | 9.1% (4.6% to 14.2%)      |
| Senegal      | Unintentional firearm injuries                  | 0 (0 to 0) | 0 (0 to 0) | -13.2% (-20.8% to -6.5%)  |
| Senegal      | Venomous animal contact                         | 0 (0 to 0) | 0 (0 to 0) | -7.4% (-13.5% to -0.4%)   |

|            |                                                 |            |            |                           |
|------------|-------------------------------------------------|------------|------------|---------------------------|
| Serbia     | Adverse effects of medical treatment            | 0 (0 to 0) | 0 (0 to 0) | 0% (0% to 0%)             |
| Serbia     | Conflict and terrorism                          | 0 (0 to 0) | 0 (0 to 0) | NA                        |
| Serbia     | Cyclist road injuries                           | 1 (0 to 1) | 1 (0 to 1) | -21.7% (-30.1% to -12.3%) |
| Serbia     | Drowning                                        | 0 (0 to 0) | 0 (0 to 0) | 110.2% (79.1% to 148.5%)  |
| Serbia     | Environmental heat and cold exposure            | 0 (0 to 0) | 0 (0 to 0) | -8.2% (-12.7% to -3.7%)   |
| Serbia     | Executions and police conflict                  | 0 (0 to 0) | 0 (0 to 0) | NA                        |
| Serbia     | Exposure to forces of nature                    | 0 (0 to 0) | 0 (0 to 0) | NA                        |
| Serbia     | Falls                                           | 4 (3 to 5) | 5 (4 to 7) | 36.8% (30.8% to 42.2%)    |
| Serbia     | Fire, heat, and hot substances                  | 0 (0 to 0) | 0 (0 to 0) | 1.2% (-4.2% to 6.3%)      |
| Serbia     | Foreign body in eyes                            | 0 (0 to 0) | 0 (0 to 0) | 0% (0% to 0%)             |
| Serbia     | Foreign body in other body part                 | 0 (0 to 0) | 0 (0 to 0) | 0.8% (-3.3% to 4.8%)      |
| Serbia     | Motor vehicle road injuries                     | 2 (1 to 3) | 1 (1 to 2) | -25.8% (-32% to -17.6%)   |
| Serbia     | Motorcyclist road injuries                      | 0 (0 to 0) | 0 (0 to 0) | -28.9% (-38.8% to -18%)   |
| Serbia     | Non-venomous animal contact                     | 0 (0 to 0) | 0 (0 to 0) | -6% (-10% to -1.1%)       |
| Serbia     | Other exposure to mechanical forces             | 1 (1 to 3) | 2 (1 to 3) | 2.1% (-3.2% to 7.4%)      |
| Serbia     | Other road injuries                             | 0 (0 to 0) | 0 (0 to 0) | -11.2% (-21% to 0.1%)     |
| Serbia     | Other transport injuries                        | 0 (0 to 0) | 0 (0 to 0) | -11.1% (-17.3% to -4.9%)  |
| Serbia     | Other unintentional injuries                    | 0 (0 to 1) | 0 (0 to 0) | -24.2% (-31.1% to -16.9%) |
| Serbia     | Pedestrian road injuries                        | 0 (0 to 1) | 0 (0 to 1) | -38.4% (-46.1% to -30.3%) |
| Serbia     | Physical violence by firearm                    | 0 (0 to 0) | 0 (0 to 0) | -8.1% (-21.6% to 7.7%)    |
| Serbia     | Physical violence by other means                | 1 (0 to 1) | 0 (0 to 1) | -37.4% (-43.1% to -31.7%) |
| Serbia     | Physical violence by sharp object               | 0 (0 to 0) | 0 (0 to 0) | -34.5% (-43.1% to -25.5%) |
| Serbia     | Poisoning by carbon monoxide                    | 0 (0 to 0) | 0 (0 to 0) | 43.4% (31.8% to 56.7%)    |
| Serbia     | Poisoning by other means                        | 0 (0 to 0) | 0 (0 to 0) | 7.8% (-3.4% to 16.3%)     |
| Serbia     | Pulmonary aspiration and foreign body in airway | 0 (0 to 0) | 0 (0 to 0) | -14.3% (-22.5% to -7.2%)  |
| Serbia     | Self-harm by firearm                            | 0 (0 to 0) | 0 (0 to 0) | -12.5% (-23.8% to 3.8%)   |
| Serbia     | Self-harm by other specified means              | 0 (0 to 1) | 0 (0 to 0) | -32.7% (-36.4% to -28.7%) |
| Serbia     | Unintentional firearm injuries                  | 0 (0 to 0) | 0 (0 to 0) | -12.6% (-21.1% to -5.3%)  |
| Serbia     | Venomous animal contact                         | 0 (0 to 0) | 0 (0 to 0) | -10.7% (-16.2% to -5.4%)  |
| Seychelles | Adverse effects of medical treatment            | 0 (0 to 0) | 0 (0 to 0) | 0% (0% to 0%)             |
| Seychelles | Conflict and terrorism                          | 0 (0 to 0) | 0 (0 to 0) | NA                        |
| Seychelles | Cyclist road injuries                           | 0 (0 to 1) | 1 (0 to 1) | 30.1% (18.8% to 43%)      |
| Seychelles | Drowning                                        | 0 (0 to 0) | 0 (0 to 0) | 29.7% (16.8% to 41.8%)    |
| Seychelles | Environmental heat and cold exposure            | 0 (0 to 0) | 0 (0 to 0) | 2.1% (-2.7% to 6.7%)      |
| Seychelles | Executions and police conflict                  | 0 (0 to 0) | 0 (0 to 0) | NA                        |
| Seychelles | Exposure to forces of nature                    | 0 (0 to 0) | 0 (0 to 0) | NA                        |
| Seychelles | Falls                                           | 4 (3 to 5) | 4 (3 to 6) | 17.5% (12.9% to 21.6%)    |
| Seychelles | Fire, heat, and hot substances                  | 0 (0 to 0) | 0 (0 to 0) | -30.4% (-35.3% to -26%)   |
| Seychelles | Foreign body in eyes                            | 0 (0 to 0) | 0 (0 to 0) | 0% (0% to 0%)             |
| Seychelles | Foreign body in other body part                 | 0 (0 to 0) | 0 (0 to 0) | -0.1% (-3.6% to 3.7%)     |
| Seychelles | Motor vehicle road injuries                     | 1 (0 to 2) | 1 (1 to 2) | 26.8% (16.1% to 38.5%)    |
| Seychelles | Motorcyclist road injuries                      | 1 (0 to 2) | 1 (1 to 2) | 6.7% (-3.4% to 17.9%)     |
| Seychelles | Non-venomous animal contact                     | 0 (0 to 0) | 0 (0 to 0) | -18.2% (-21.7% to -13.5%) |

|              |                                                 |            |            |                           |
|--------------|-------------------------------------------------|------------|------------|---------------------------|
| Seychelles   | Other exposure to mechanical forces             | 0 (0 to 1) | 0 (0 to 0) | -26.8% (-33.7% to -21.1%) |
| Seychelles   | Other road injuries                             | 0 (0 to 0) | 0 (0 to 0) | 26.6% (14.8% to 40.3%)    |
| Seychelles   | Other transport injuries                        | 0 (0 to 0) | 0 (0 to 0) | 3.4% (-1.9% to 8.8%)      |
| Seychelles   | Other unintentional injuries                    | 0 (0 to 0) | 0 (0 to 0) | -12.8% (-18.3% to -6.9%)  |
| Seychelles   | Pedestrian road injuries                        | 1 (0 to 1) | 1 (0 to 1) | 12.4% (3.5% to 21.8%)     |
| Seychelles   | Physical violence by firearm                    | 0 (0 to 0) | 0 (0 to 0) | 42% (28.2% to 59.1%)      |
| Seychelles   | Physical violence by other means                | 1 (0 to 1) | 0 (0 to 1) | -16.1% (-21.1% to -10.9%) |
| Seychelles   | Physical violence by sharp object               | 0 (0 to 0) | 0 (0 to 0) | -21.5% (-29% to -14.3%)   |
| Seychelles   | Poisoning by carbon monoxide                    | 0 (0 to 0) | 0 (0 to 0) | 13% (2.4% to 25.5%)       |
| Seychelles   | Poisoning by other means                        | 0 (0 to 0) | 0 (0 to 0) | -15.7% (-21.5% to -10.1%) |
| Seychelles   | Pulmonary aspiration and foreign body in airway | 0 (0 to 0) | 0 (0 to 0) | -17.9% (-24.8% to -10.4%) |
| Seychelles   | Self-harm by firearm                            | 0 (0 to 0) | 0 (0 to 0) | 29.4% (7.5% to 58.8%)     |
| Seychelles   | Self-harm by other specified means              | 0 (0 to 0) | 0 (0 to 0) | 2.5% (-2.8% to 9.4%)      |
| Seychelles   | Unintentional firearm injuries                  | 0 (0 to 0) | 0 (0 to 0) | -12.6% (-21.4% to -3.4%)  |
| Seychelles   | Venomous animal contact                         | 0 (0 to 0) | 0 (0 to 0) | -24.7% (-32.6% to -16.6%) |
| Sierra Leone | Adverse effects of medical treatment            | 0 (0 to 0) | 0 (0 to 0) | 0% (0% to 0%)             |
| Sierra Leone | Conflict and terrorism                          | 0 (0 to 0) | 0 (0 to 0) | NA                        |
| Sierra Leone | Cyclist road injuries                           | 1 (1 to 2) | 1 (1 to 2) | 11.7% (4.6% to 19.3%)     |
| Sierra Leone | Drowning                                        | 0 (0 to 0) | 0 (0 to 0) | -14.7% (-21.2% to -8.9%)  |
| Sierra Leone | Environmental heat and cold exposure            | 0 (0 to 0) | 0 (0 to 0) | 2.1% (-3.2% to 7.7%)      |
| Sierra Leone | Executions and police conflict                  | 0 (0 to 0) | 0 (0 to 0) | NA                        |
| Sierra Leone | Exposure to forces of nature                    | 0 (0 to 0) | 0 (0 to 0) | NA                        |
| Sierra Leone | Falls                                           | 2 (2 to 4) | 3 (2 to 4) | 16.5% (12% to 20.8%)      |
| Sierra Leone | Fire, heat, and hot substances                  | 0 (0 to 0) | 0 (0 to 0) | -5.6% (-11.2% to 0.6%)    |
| Sierra Leone | Foreign body in eyes                            | 0 (0 to 0) | 0 (0 to 0) | 0% (0% to 0%)             |
| Sierra Leone | Foreign body in other body part                 | 1 (0 to 1) | 1 (0 to 1) | 0.3% (-2.9% to 4.3%)      |
| Sierra Leone | Motor vehicle road injuries                     | 2 (1 to 3) | 2 (1 to 3) | 18.5% (10.2% to 27.6%)    |
| Sierra Leone | Motorcyclist road injuries                      | 1 (1 to 2) | 1 (1 to 2) | 3.8% (-3.6% to 10.9%)     |
| Sierra Leone | Non-venomous animal contact                     | 0 (0 to 0) | 0 (0 to 0) | 3.7% (-0.6% to 8.1%)      |
| Sierra Leone | Other exposure to mechanical forces             | 0 (0 to 0) | 0 (0 to 0) | -10.9% (-15.1% to -7%)    |
| Sierra Leone | Other road injuries                             | 0 (0 to 0) | 0 (0 to 0) | 16.2% (6.3% to 26.1%)     |
| Sierra Leone | Other transport injuries                        | 0 (0 to 1) | 0 (0 to 1) | -3.2% (-7.1% to 1.3%)     |
| Sierra Leone | Other unintentional injuries                    | 0 (0 to 1) | 0 (0 to 0) | -14.9% (-19.5% to -10.2%) |
| Sierra Leone | Pedestrian road injuries                        | 1 (1 to 2) | 1 (1 to 3) | 15.4% (7.2% to 23.4%)     |
| Sierra Leone | Physical violence by firearm                    | 0 (0 to 0) | 0 (0 to 0) | 22.8% (6.8% to 41.5%)     |
| Sierra Leone | Physical violence by other means                | 0 (0 to 0) | 0 (0 to 0) | -6.6% (-12% to -1.1%)     |
| Sierra Leone | Physical violence by sharp object               | 0 (0 to 0) | 0 (0 to 0) | -5.1% (-11.8% to 1.4%)    |
| Sierra Leone | Poisoning by carbon monoxide                    | 0 (0 to 0) | 0 (0 to 0) | 9.2% (-3.2% to 24.7%)     |
| Sierra Leone | Poisoning by other means                        | 0 (0 to 0) | 0 (0 to 0) | -20.9% (-27.6% to -14.2%) |
| Sierra Leone | Pulmonary aspiration and foreign body in airway | 0 (0 to 0) | 0 (0 to 0) | -5.8% (-15.3% to 4.6%)    |
| Sierra Leone | Self-harm by firearm                            | 0 (0 to 0) | 0 (0 to 0) | 25.8% (13.5% to 40.3%)    |
| Sierra Leone | Self-harm by other specified means              | 0 (0 to 0) | 0 (0 to 0) | 36.6% (30.9% to 43%)      |
| Sierra Leone | Unintentional firearm injuries                  | 0 (0 to 0) | 0 (0 to 0) | -14.4% (-21.2% to -8%)    |



|              |                                                 |             |             |                           |
|--------------|-------------------------------------------------|-------------|-------------|---------------------------|
| Sierra Leone | Venomous animal contact                         | 0 (0 to 0)  | 0 (0 to 0)  | 6.9% (-0.2% to 13.9%)     |
| Singapore    | Adverse effects of medical treatment            | 0 (0 to 0)  | 0 (0 to 0)  | 0% (0% to 0%)             |
| Singapore    | Conflict and terrorism                          | 0 (0 to 0)  | 0 (0 to 0)  | NA                        |
| Singapore    | Cyclist road injuries                           | 0 (0 to 0)  | 0 (0 to 0)  | -23.3% (-32.3% to -12.9%) |
| Singapore    | Drowning                                        | 0 (0 to 0)  | 0 (0 to 0)  | 135.7% (114.5% to 155.4%) |
| Singapore    | Environmental heat and cold exposure            | 0 (0 to 0)  | 0 (0 to 0)  | 10.6% (6.4% to 15.3%)     |
| Singapore    | Executions and police conflict                  | 0 (0 to 0)  | 0 (0 to 0)  | NA                        |
| Singapore    | Exposure to forces of nature                    | 0 (0 to 0)  | 0 (0 to 0)  | NA                        |
| Singapore    | Falls                                           | 3 (2 to 4)  | 3 (3 to 5)  | 3.7% (-1.1% to 8.4%)      |
| Singapore    | Fire, heat, and hot substances                  | 0 (0 to 0)  | 0 (0 to 0)  | 1.4% (-2.8% to 5.4%)      |
| Singapore    | Foreign body in eyes                            | 0 (0 to 0)  | 0 (0 to 0)  | 0% (0% to 0%)             |
| Singapore    | Foreign body in other body part                 | 0 (0 to 1)  | 0 (0 to 1)  | -4% (-6.7% to -0.9%)      |
| Singapore    | Motor vehicle road injuries                     | 0 (0 to 1)  | 0 (0 to 0)  | -18.3% (-28.7% to -7.4%)  |
| Singapore    | Motorcyclist road injuries                      | 0 (0 to 0)  | 0 (0 to 0)  | -42.5% (-52.7% to -31.5%) |
| Singapore    | Non-venomous animal contact                     | 0 (0 to 0)  | 0 (0 to 0)  | -26.5% (-29.5% to -23.3%) |
| Singapore    | Other exposure to mechanical forces             | 1 (0 to 2)  | 1 (0 to 1)  | -11.7% (-19% to -5.5%)    |
| Singapore    | Other road injuries                             | 0 (0 to 0)  | 0 (0 to 0)  | -15.9% (-26.4% to -4.4%)  |
| Singapore    | Other transport injuries                        | 0 (0 to 0)  | 0 (0 to 0)  | -5.5% (-8.9% to -1.8%)    |
| Singapore    | Other unintentional injuries                    | 0 (0 to 1)  | 0 (0 to 1)  | -18.2% (-24.3% to -12.5%) |
| Singapore    | Pedestrian road injuries                        | 0 (0 to 0)  | 0 (0 to 0)  | -25.6% (-37.3% to -12.5%) |
| Singapore    | Physical violence by firearm                    | 0 (0 to 0)  | 0 (0 to 0)  | 43.2% (22.7% to 69%)      |
| Singapore    | Physical violence by other means                | 0 (0 to 0)  | 0 (0 to 0)  | -28% (-38.4% to -18.2%)   |
| Singapore    | Physical violence by sharp object               | 0 (0 to 0)  | 0 (0 to 0)  | -34.5% (-47% to -21.7%)   |
| Singapore    | Poisoning by carbon monoxide                    | 0 (0 to 0)  | 0 (0 to 0)  | 14.7% (4.7% to 24.7%)     |
| Singapore    | Poisoning by other means                        | 0 (0 to 0)  | 0 (0 to 0)  | -5% (-9.9% to 0%)         |
| Singapore    | Pulmonary aspiration and foreign body in airway | 0 (0 to 0)  | 0 (0 to 0)  | -15.1% (-21.1% to -8%)    |
| Singapore    | Self-harm by firearm                            | 0 (0 to 0)  | 0 (0 to 0)  | 13.1% (-1.1% to 32.9%)    |
| Singapore    | Self-harm by other specified means              | 0 (0 to 1)  | 0 (0 to 0)  | -35.6% (-39.4% to -31%)   |
| Singapore    | Unintentional firearm injuries                  | 0 (0 to 0)  | 0 (0 to 0)  | 0.4% (-9.1% to 10%)       |
| Singapore    | Venomous animal contact                         | 0 (0 to 0)  | 0 (0 to 0)  | -23.7% (-28.2% to -18.7%) |
| Slovakia     | Adverse effects of medical treatment            | 0 (0 to 0)  | 0 (0 to 0)  | 0% (0% to 0%)             |
| Slovakia     | Conflict and terrorism                          | 0 (0 to 0)  | 0 (0 to 0)  | NA                        |
| Slovakia     | Cyclist road injuries                           | 1 (0 to 1)  | 1 (0 to 1)  | -30.8% (-39% to -22%)     |
| Slovakia     | Drowning                                        | 0 (0 to 0)  | 0 (0 to 0)  | 93% (73.6% to 118.5%)     |
| Slovakia     | Environmental heat and cold exposure            | 0 (0 to 0)  | 0 (0 to 0)  | -6.4% (-11.1% to -1.6%)   |
| Slovakia     | Executions and police conflict                  | 0 (0 to 0)  | 0 (0 to 0)  | NA                        |
| Slovakia     | Exposure to forces of nature                    | 0 (0 to 0)  | 0 (0 to 0)  | NA                        |
| Slovakia     | Falls                                           | 8 (6 to 11) | 8 (6 to 11) | 3.5% (-0.6% to 8.2%)      |
| Slovakia     | Fire, heat, and hot substances                  | 0 (0 to 0)  | 0 (0 to 0)  | -4.4% (-9% to 0.3%)       |
| Slovakia     | Foreign body in eyes                            | 0 (0 to 0)  | 0 (0 to 0)  | 0% (0% to 0%)             |
| Slovakia     | Foreign body in other body part                 | 0 (0 to 0)  | 0 (0 to 0)  | 1.7% (-2.5% to 5.2%)      |
| Slovakia     | Motor vehicle road injuries                     | 2 (1 to 3)  | 1 (1 to 2)  | -26.1% (-34.4% to -17.4%) |
| Slovakia     | Motorcyclist road injuries                      | 0 (0 to 0)  | 0 (0 to 0)  | -19.6% (-31.3% to -7%)    |

|          |                                                 |              |              |                           |
|----------|-------------------------------------------------|--------------|--------------|---------------------------|
| Slovakia | Non-venomous animal contact                     | 0 (0 to 0)   | 0 (0 to 0)   | -21.4% (-24.9% to -18.3%) |
| Slovakia | Other exposure to mechanical forces             | 2 (1 to 3)   | 2 (1 to 3)   | -9% (-16.4% to -2.8%)     |
| Slovakia | Other road injuries                             | 0 (0 to 0)   | 0 (0 to 0)   | -6.2% (-16.9% to 5.8%)    |
| Slovakia | Other transport injuries                        | 0 (0 to 0)   | 0 (0 to 0)   | -19.1% (-23.8% to -14.3%) |
| Slovakia | Other unintentional injuries                    | 0 (0 to 0)   | 0 (0 to 0)   | -10.7% (-15.9% to -5%)    |
| Slovakia | Pedestrian road injuries                        | 1 (0 to 1)   | 0 (0 to 1)   | -44.5% (-51.4% to -37%)   |
| Slovakia | Physical violence by firearm                    | 0 (0 to 0)   | 0 (0 to 0)   | 32.7% (15.9% to 50.9%)    |
| Slovakia | Physical violence by other means                | 0 (0 to 1)   | 0 (0 to 1)   | -19.2% (-26.4% to -12%)   |
| Slovakia | Physical violence by sharp object               | 0 (0 to 0)   | 0 (0 to 0)   | -24.3% (-32.9% to -16.2%) |
| Slovakia | Poisoning by carbon monoxide                    | 0 (0 to 0)   | 0 (0 to 0)   | 30% (19.5% to 42.4%)      |
| Slovakia | Poisoning by other means                        | 0 (0 to 0)   | 0 (0 to 0)   | -1.5% (-8.8% to 5.4%)     |
| Slovakia | Pulmonary aspiration and foreign body in airway | 0 (0 to 0)   | 0 (0 to 0)   | -17.2% (-23.1% to -10.4%) |
| Slovakia | Self-harm by firearm                            | 0 (0 to 0)   | 0 (0 to 0)   | -3.6% (-15.7% to 10.4%)   |
| Slovakia | Self-harm by other specified means              | 0 (0 to 0)   | 0 (0 to 0)   | -15% (-19.7% to -9.9%)    |
| Slovakia | Unintentional firearm injuries                  | 0 (0 to 0)   | 0 (0 to 0)   | -16% (-26% to -7%)        |
| Slovakia | Venomous animal contact                         | 0 (0 to 0)   | 0 (0 to 0)   | -17.8% (-22.5% to -12.1%) |
| Slovenia | Adverse effects of medical treatment            | 0 (0 to 0)   | 0 (0 to 0)   | 0% (0% to 0%)             |
| Slovenia | Conflict and terrorism                          | 0 (0 to 0)   | 0 (0 to 0)   | NA                        |
| Slovenia | Cyclist road injuries                           | 1 (0 to 2)   | 1 (0 to 1)   | -30.1% (-37.8% to -20.6%) |
| Slovenia | Drowning                                        | 0 (0 to 0)   | 0 (0 to 0)   | 142.8% (116.2% to 172.6%) |
| Slovenia | Environmental heat and cold exposure            | 0 (0 to 0)   | 0 (0 to 0)   | -40.7% (-46.4% to -35.1%) |
| Slovenia | Executions and police conflict                  | 0 (0 to 0)   | 0 (0 to 0)   | NA                        |
| Slovenia | Exposure to forces of nature                    | 0 (0 to 0)   | 0 (0 to 0)   | NA                        |
| Slovenia | Falls                                           | 10 (7 to 13) | 10 (7 to 13) | 0% (-4.5% to 4.8%)        |
| Slovenia | Fire, heat, and hot substances                  | 0 (0 to 0)   | 0 (0 to 0)   | 0.4% (-4.7% to 5.5%)      |
| Slovenia | Foreign body in eyes                            | 0 (0 to 0)   | 0 (0 to 0)   | 0% (0% to 0%)             |
| Slovenia | Foreign body in other body part                 | 0 (0 to 0)   | 0 (0 to 0)   | 2.7% (-1.4% to 6.9%)      |
| Slovenia | Motor vehicle road injuries                     | 3 (2 to 5)   | 2 (1 to 3)   | -50.5% (-56% to -45.1%)   |
| Slovenia | Motorcyclist road injuries                      | 0 (0 to 1)   | 0 (0 to 1)   | -12.4% (-25.4% to 4.3%)   |
| Slovenia | Non-venomous animal contact                     | 0 (0 to 0)   | 0 (0 to 0)   | -16.1% (-19.9% to -12%)   |
| Slovenia | Other exposure to mechanical forces             | 2 (1 to 4)   | 2 (1 to 4)   | -15.1% (-22.1% to -8.1%)  |
| Slovenia | Other road injuries                             | 0 (0 to 0)   | 0 (0 to 0)   | -10.3% (-21.7% to 1.7%)   |
| Slovenia | Other transport injuries                        | 0 (0 to 0)   | 0 (0 to 0)   | -2.9% (-7.5% to 1.3%)     |
| Slovenia | Other unintentional injuries                    | 0 (0 to 1)   | 0 (0 to 1)   | 8.7% (2.2% to 15.2%)      |
| Slovenia | Pedestrian road injuries                        | 0 (0 to 1)   | 0 (0 to 1)   | -38.1% (-48.1% to -26.3%) |
| Slovenia | Physical violence by firearm                    | 0 (0 to 0)   | 0 (0 to 0)   | 24.7% (9.8% to 41.6%)     |
| Slovenia | Physical violence by other means                | 0 (0 to 1)   | 0 (0 to 1)   | -20.8% (-29.9% to -12.7%) |
| Slovenia | Physical violence by sharp object               | 0 (0 to 0)   | 0 (0 to 0)   | -29% (-39.6% to -19.1%)   |
| Slovenia | Poisoning by carbon monoxide                    | 0 (0 to 0)   | 0 (0 to 0)   | 33.7% (23.3% to 44.7%)    |
| Slovenia | Poisoning by other means                        | 0 (0 to 0)   | 0 (0 to 0)   | 1.7% (-5.4% to 9%)        |
| Slovenia | Pulmonary aspiration and foreign body in airway | 0 (0 to 0)   | 0 (0 to 0)   | -5.9% (-13.1% to 1.6%)    |
| Slovenia | Self-harm by firearm                            | 0 (0 to 0)   | 0 (0 to 0)   | -18.6% (-28.4% to -5.3%)  |
| Slovenia | Self-harm by other specified means              | 1 (0 to 1)   | 0 (0 to 1)   | -39.2% (-43% to -35.1%)   |

|                 |                                                 |              |            |                           |
|-----------------|-------------------------------------------------|--------------|------------|---------------------------|
| Slovenia        | Unintentional firearm injuries                  | 0 (0 to 0)   | 0 (0 to 0) | 1.4% (-9.5% to 12.8%)     |
| Slovenia        | Venomous animal contact                         | 0 (0 to 0)   | 0 (0 to 0) | -11.2% (-16.1% to -4.9%)  |
| Solomon Islands | Adverse effects of medical treatment            | 0 (0 to 0)   | 0 (0 to 0) | 0% (0% to 0%)             |
| Solomon Islands | Conflict and terrorism                          | 0 (0 to 0)   | 0 (0 to 0) | NA                        |
| Solomon Islands | Cyclist road injuries                           | 0 (0 to 0)   | 0 (0 to 0) | 7.2% (-0.1% to 14.9%)     |
| Solomon Islands | Drowning                                        | 0 (0 to 0)   | 0 (0 to 0) | 3.5% (-6.2% to 13.9%)     |
| Solomon Islands | Environmental heat and cold exposure            | 0 (0 to 0)   | 0 (0 to 0) | -4.8% (-10.3% to 0.8%)    |
| Solomon Islands | Executions and police conflict                  | 0 (0 to 0)   | 0 (0 to 0) | NA                        |
| Solomon Islands | Exposure to forces of nature                    | 0 (0 to 0)   | 0 (0 to 0) | NA                        |
| Solomon Islands | Falls                                           | 2 (2 to 3)   | 3 (2 to 4) | 40.9% (35.6% to 46.6%)    |
| Solomon Islands | Fire, heat, and hot substances                  | 0 (0 to 0)   | 0 (0 to 0) | -10.4% (-16.3% to -5%)    |
| Solomon Islands | Foreign body in eyes                            | 0 (0 to 0)   | 0 (0 to 0) | 0% (0% to 0%)             |
| Solomon Islands | Foreign body in other body part                 | 0 (0 to 0)   | 0 (0 to 0) | -2.8% (-5.8% to 0.5%)     |
| Solomon Islands | Motor vehicle road injuries                     | 0 (0 to 1)   | 0 (0 to 1) | -3.2% (-10% to 3.8%)      |
| Solomon Islands | Motorcyclist road injuries                      | 0 (0 to 0)   | 0 (0 to 0) | 5.5% (-3.6% to 14.9%)     |
| Solomon Islands | Non-venomous animal contact                     | 0 (0 to 0)   | 0 (0 to 0) | -15.9% (-20% to -12%)     |
| Solomon Islands | Other exposure to mechanical forces             | 0 (0 to 0)   | 0 (0 to 0) | -12.5% (-18.9% to -6.8%)  |
| Solomon Islands | Other road injuries                             | 0 (0 to 0)   | 0 (0 to 0) | 4.3% (-4.2% to 13.6%)     |
| Solomon Islands | Other transport injuries                        | 0 (0 to 0)   | 0 (0 to 0) | -8.8% (-12.9% to -5.5%)   |
| Solomon Islands | Other unintentional injuries                    | 0 (0 to 0)   | 0 (0 to 0) | -6.5% (-11.2% to -1.2%)   |
| Solomon Islands | Pedestrian road injuries                        | 0 (0 to 0)   | 0 (0 to 0) | 1.4% (-6.5% to 9.6%)      |
| Solomon Islands | Physical violence by firearm                    | 0 (0 to 0)   | 0 (0 to 0) | -13.1% (-24.2% to -1.9%)  |
| Solomon Islands | Physical violence by other means                | 0 (0 to 1)   | 0 (0 to 1) | -27.3% (-33.2% to -21.7%) |
| Solomon Islands | Physical violence by sharp object               | 0 (0 to 0)   | 0 (0 to 0) | -35.3% (-41.6% to -29.1%) |
| Solomon Islands | Poisoning by carbon monoxide                    | 0 (0 to 0)   | 0 (0 to 0) | 28.7% (16.1% to 44%)      |
| Solomon Islands | Poisoning by other means                        | 0 (0 to 0)   | 0 (0 to 0) | 0.1% (-7.9% to 8%)        |
| Solomon Islands | Pulmonary aspiration and foreign body in airway | 0 (0 to 0)   | 0 (0 to 0) | -0.4% (-11% to 11.1%)     |
| Solomon Islands | Self-harm by firearm                            | 0 (0 to 0)   | 0 (0 to 0) | -1.7% (-17.2% to 13.4%)   |
| Solomon Islands | Self-harm by other specified means              | 0 (0 to 0)   | 0 (0 to 0) | 16.4% (8.7% to 25.6%)     |
| Solomon Islands | Unintentional firearm injuries                  | 0 (0 to 0)   | 0 (0 to 0) | -14% (-19.5% to -8.4%)    |
| Solomon Islands | Venomous animal contact                         | 0 (0 to 0)   | 0 (0 to 0) | -10.1% (-16.8% to -2.8%)  |
| Somalia         | Adverse effects of medical treatment            | 0 (0 to 0)   | 0 (0 to 0) | 0% (0% to 0%)             |
| Somalia         | Conflict and terrorism                          | 11 (2 to 37) | 2 (0 to 8) | NA                        |
| Somalia         | Cyclist road injuries                           | 1 (1 to 2)   | 1 (1 to 3) | 9.5% (1.8% to 18.2%)      |
| Somalia         | Drowning                                        | 0 (0 to 0)   | 0 (0 to 0) | -13.3% (-18.3% to -7.6%)  |
| Somalia         | Environmental heat and cold exposure            | 0 (0 to 0)   | 0 (0 to 0) | -6.3% (-11% to -1.8%)     |
| Somalia         | Executions and police conflict                  | 0 (0 to 0)   | 0 (0 to 0) | NA                        |
| Somalia         | Exposure to forces of nature                    | 0 (0 to 0)   | 0 (0 to 0) | NA                        |
| Somalia         | Falls                                           | 3 (2 to 4)   | 3 (2 to 4) | 10.2% (6.4% to 13.6%)     |
| Somalia         | Fire, heat, and hot substances                  | 0 (0 to 0)   | 0 (0 to 0) | -11.3% (-15.6% to -6.7%)  |
| Somalia         | Foreign body in eyes                            | 0 (0 to 0)   | 0 (0 to 0) | 0% (0% to 0%)             |
| Somalia         | Foreign body in other body part                 | 1 (0 to 1)   | 1 (0 to 1) | -4.2% (-8.7% to -0.3%)    |
| Somalia         | Motor vehicle road injuries                     | 1 (0 to 2)   | 1 (0 to 2) | -9.1% (-16.5% to -0.9%)   |

|              |                                                 |            |            |                           |
|--------------|-------------------------------------------------|------------|------------|---------------------------|
| Somalia      | Motorcyclist road injuries                      | 1 (0 to 1) | 1 (0 to 1) | 20.9% (11.6% to 32%)      |
| Somalia      | Non-venomous animal contact                     | 1 (0 to 1) | 1 (0 to 2) | 2.3% (-2.3% to 7.1%)      |
| Somalia      | Other exposure to mechanical forces             | 0 (0 to 0) | 0 (0 to 0) | -6.1% (-10.8% to -0.3%)   |
| Somalia      | Other road injuries                             | 0 (0 to 0) | 0 (0 to 0) | -6.3% (-13.9% to 1.5%)    |
| Somalia      | Other transport injuries                        | 0 (0 to 1) | 0 (0 to 1) | 7.8% (2.6% to 12.9%)      |
| Somalia      | Other unintentional injuries                    | 0 (0 to 1) | 0 (0 to 0) | -11% (-14.9% to -6.7%)    |
| Somalia      | Pedestrian road injuries                        | 2 (1 to 4) | 2 (1 to 3) | -12% (-17.5% to -6.2%)    |
| Somalia      | Physical violence by firearm                    | 0 (0 to 0) | 0 (0 to 0) | 24% (13.3% to 34.6%)      |
| Somalia      | Physical violence by other means                | 0 (0 to 0) | 0 (0 to 0) | 17.3% (9.1% to 25.7%)     |
| Somalia      | Physical violence by sharp object               | 0 (0 to 0) | 0 (0 to 0) | 23% (13.3% to 33.5%)      |
| Somalia      | Poisoning by carbon monoxide                    | 0 (0 to 0) | 0 (0 to 0) | 3.5% (-7.2% to 15.7%)     |
| Somalia      | Poisoning by other means                        | 0 (0 to 0) | 0 (0 to 0) | -18.3% (-23.9% to -11.8%) |
| Somalia      | Pulmonary aspiration and foreign body in airway | 0 (0 to 0) | 0 (0 to 0) | -5.9% (-16.5% to 5.9%)    |
| Somalia      | Self-harm by firearm                            | 0 (0 to 0) | 0 (0 to 0) | 11.3% (-1.2% to 26.1%)    |
| Somalia      | Self-harm by other specified means              | 0 (0 to 0) | 0 (0 to 0) | 1.6% (-3% to 6.8%)        |
| Somalia      | Unintentional firearm injuries                  | 0 (0 to 0) | 0 (0 to 0) | -3.3% (-9.6% to 4.2%)     |
| Somalia      | Venomous animal contact                         | 0 (0 to 0) | 0 (0 to 0) | 4.2% (-2.2% to 11.6%)     |
| South Africa | Adverse effects of medical treatment            | 0 (0 to 0) | 0 (0 to 0) | 0% (0% to 0%)             |
| South Africa | Conflict and terrorism                          | 0 (0 to 1) | 0 (0 to 0) | NA                        |
| South Africa | Cyclist road injuries                           | 1 (0 to 1) | 1 (0 to 1) | -1.8% (-7.6% to 4.3%)     |
| South Africa | Drowning                                        | 0 (0 to 0) | 0 (0 to 0) | -35.5% (-42.2% to -26.4%) |
| South Africa | Environmental heat and cold exposure            | 0 (0 to 0) | 0 (0 to 0) | -5.9% (-10.6% to -1.2%)   |
| South Africa | Executions and police conflict                  | 0 (0 to 0) | 0 (0 to 0) | NA                        |
| South Africa | Exposure to forces of nature                    | 0 (0 to 0) | 0 (0 to 0) | NA                        |
| South Africa | Falls                                           | 3 (2 to 4) | 2 (2 to 4) | -6.3% (-8.6% to -3.8%)    |
| South Africa | Fire, heat, and hot substances                  | 0 (0 to 0) | 0 (0 to 0) | -30.7% (-35% to -26.2%)   |
| South Africa | Foreign body in eyes                            | 0 (0 to 0) | 0 (0 to 0) | 0% (0% to 0%)             |
| South Africa | Foreign body in other body part                 | 1 (1 to 2) | 1 (1 to 2) | -1.3% (-2.9% to 0.4%)     |
| South Africa | Motor vehicle road injuries                     | 2 (1 to 3) | 1 (1 to 2) | -23.4% (-28.5% to -18.2%) |
| South Africa | Motorcyclist road injuries                      | 0 (0 to 1) | 0 (0 to 1) | -21.2% (-26.8% to -16%)   |
| South Africa | Non-venomous animal contact                     | 0 (0 to 0) | 0 (0 to 0) | -11.3% (-15.6% to -6.3%)  |
| South Africa | Other exposure to mechanical forces             | 0 (0 to 1) | 0 (0 to 0) | -24.5% (-27.8% to -20.9%) |
| South Africa | Other road injuries                             | 0 (0 to 0) | 0 (0 to 0) | -0.4% (-7.4% to 6.4%)     |
| South Africa | Other transport injuries                        | 0 (0 to 1) | 0 (0 to 1) | -9.6% (-13.5% to -5.8%)   |
| South Africa | Other unintentional injuries                    | 0 (0 to 0) | 0 (0 to 0) | -15.1% (-19.4% to -10.9%) |
| South Africa | Pedestrian road injuries                        | 2 (1 to 3) | 1 (1 to 2) | -23.7% (-28.7% to -18.5%) |
| South Africa | Physical violence by firearm                    | 0 (0 to 0) | 0 (0 to 0) | -60.1% (-67.1% to -50.2%) |
| South Africa | Physical violence by other means                | 1 (0 to 2) | 0 (0 to 1) | -39.2% (-42.7% to -35.3%) |
| South Africa | Physical violence by sharp object               | 0 (0 to 1) | 0 (0 to 1) | -37.2% (-41.2% to -32.3%) |
| South Africa | Poisoning by carbon monoxide                    | 0 (0 to 0) | 0 (0 to 0) | -2.4% (-23.3% to 15.4%)   |
| South Africa | Poisoning by other means                        | 0 (0 to 0) | 0 (0 to 0) | -16.9% (-35.5% to 1.9%)   |
| South Africa | Pulmonary aspiration and foreign body in airway | 0 (0 to 0) | 0 (0 to 0) | -15.5% (-21.6% to -10.4%) |
| South Africa | Self-harm by firearm                            | 0 (0 to 0) | 0 (0 to 0) | -9.7% (-19.2% to 3.1%)    |

|              |                                                 |            |            |                           |
|--------------|-------------------------------------------------|------------|------------|---------------------------|
| South Africa | Self-harm by other specified means              | 0 (0 to 0) | 0 (0 to 0) | -34.3% (-39.4% to -29%)   |
| South Africa | Unintentional firearm injuries                  | 0 (0 to 0) | 0 (0 to 0) | -14.1% (-20.6% to -5.7%)  |
| South Africa | Venomous animal contact                         | 0 (0 to 0) | 0 (0 to 0) | -3.5% (-12.7% to 6.3%)    |
| South Sudan  | Adverse effects of medical treatment            | 0 (0 to 0) | 0 (0 to 0) | 0% (0% to 0%)             |
| South Sudan  | Conflict and terrorism                          | 0 (0 to 0) | 2 (0 to 5) | NA                        |
| South Sudan  | Cyclist road injuries                           | 1 (1 to 3) | 1 (1 to 3) | -6.2% (-12.1% to 0.1%)    |
| South Sudan  | Drowning                                        | 0 (0 to 0) | 0 (0 to 0) | -11.1% (-17.3% to -5.1%)  |
| South Sudan  | Environmental heat and cold exposure            | 0 (0 to 0) | 0 (0 to 0) | -7.7% (-11.9% to -3.4%)   |
| South Sudan  | Executions and police conflict                  | 0 (0 to 0) | 0 (0 to 0) | NA                        |
| South Sudan  | Exposure to forces of nature                    | 0 (0 to 0) | 0 (0 to 0) | NA                        |
| South Sudan  | Falls                                           | 3 (2 to 4) | 3 (2 to 4) | 6.8% (3.2% to 10.9%)      |
| South Sudan  | Fire, heat, and hot substances                  | 0 (0 to 0) | 0 (0 to 0) | -9.9% (-14.2% to -6.3%)   |
| South Sudan  | Foreign body in eyes                            | 0 (0 to 0) | 0 (0 to 0) | 0% (0% to 0%)             |
| South Sudan  | Foreign body in other body part                 | 1 (0 to 1) | 1 (0 to 1) | -5.7% (-9.1% to -2.3%)    |
| South Sudan  | Motor vehicle road injuries                     | 2 (1 to 3) | 1 (1 to 3) | -11.1% (-17.3% to -4.3%)  |
| South Sudan  | Motorcyclist road injuries                      | 1 (0 to 1) | 0 (0 to 1) | -9.7% (-16.4% to -2.9%)   |
| South Sudan  | Non-venomous animal contact                     | 1 (0 to 1) | 0 (0 to 1) | -10.5% (-14.5% to -6.9%)  |
| South Sudan  | Other exposure to mechanical forces             | 0 (0 to 1) | 0 (0 to 1) | -9.9% (-13.9% to -5.9%)   |
| South Sudan  | Other road injuries                             | 0 (0 to 0) | 0 (0 to 0) | -7.5% (-15.2% to 0.7%)    |
| South Sudan  | Other transport injuries                        | 0 (0 to 1) | 0 (0 to 1) | -5.7% (-9.1% to -1.9%)    |
| South Sudan  | Other unintentional injuries                    | 0 (0 to 1) | 0 (0 to 0) | -13.1% (-16.7% to -9.2%)  |
| South Sudan  | Pedestrian road injuries                        | 3 (1 to 5) | 2 (1 to 4) | -19.3% (-24.5% to -13.9%) |
| South Sudan  | Physical violence by firearm                    | 0 (0 to 0) | 0 (0 to 0) | 52.9% (38.9% to 69.8%)    |
| South Sudan  | Physical violence by other means                | 0 (0 to 0) | 0 (0 to 1) | 47.8% (36.9% to 59.8%)    |
| South Sudan  | Physical violence by sharp object               | 0 (0 to 0) | 0 (0 to 0) | 50.3% (36.6% to 65%)      |
| South Sudan  | Poisoning by carbon monoxide                    | 0 (0 to 0) | 0 (0 to 0) | 8.3% (-0.8% to 20.1%)     |
| South Sudan  | Poisoning by other means                        | 0 (0 to 0) | 0 (0 to 0) | -15.7% (-21.6% to -10.1%) |
| South Sudan  | Pulmonary aspiration and foreign body in airway | 0 (0 to 0) | 0 (0 to 0) | -5.4% (-15.6% to 5.3%)    |
| South Sudan  | Self-harm by firearm                            | 0 (0 to 0) | 0 (0 to 0) | 1.2% (-9.7% to 15%)       |
| South Sudan  | Self-harm by other specified means              | 0 (0 to 0) | 0 (0 to 0) | -10.7% (-15.4% to -6.3%)  |
| South Sudan  | Unintentional firearm injuries                  | 0 (0 to 0) | 0 (0 to 0) | -13.3% (-19.3% to -7.9%)  |
| South Sudan  | Venomous animal contact                         | 0 (0 to 0) | 0 (0 to 0) | -10.1% (-16.8% to -4.1%)  |
| Spain        | Adverse effects of medical treatment            | 0 (0 to 0) | 0 (0 to 0) | 0% (0% to 0%)             |
| Spain        | Conflict and terrorism                          | 0 (0 to 0) | 0 (0 to 0) | NA                        |
| Spain        | Cyclist road injuries                           | 0 (0 to 0) | 0 (0 to 0) | -25.6% (-37.5% to -11.4%) |
| Spain        | Drowning                                        | 0 (0 to 0) | 0 (0 to 0) | 39.8% (26.3% to 51.6%)    |
| Spain        | Environmental heat and cold exposure            | 0 (0 to 0) | 0 (0 to 0) | -2.4% (-6.7% to 2.4%)     |
| Spain        | Executions and police conflict                  | 0 (0 to 0) | 0 (0 to 0) | NA                        |
| Spain        | Exposure to forces of nature                    | 0 (0 to 0) | 0 (0 to 0) | NA                        |
| Spain        | Falls                                           | 4 (3 to 5) | 5 (4 to 7) | 28.4% (21.3% to 35.7%)    |
| Spain        | Fire, heat, and hot substances                  | 0 (0 to 0) | 0 (0 to 0) | -5.8% (-10.3% to -1%)     |
| Spain        | Foreign body in eyes                            | 0 (0 to 0) | 0 (0 to 0) | 0% (0% to 0%)             |
| Spain        | Foreign body in other body part                 | 0 (0 to 0) | 0 (0 to 0) | 3.1% (-0.9% to 6.7%)      |

|           |                                                 |              |            |                           |
|-----------|-------------------------------------------------|--------------|------------|---------------------------|
| Spain     | Motor vehicle road injuries                     | 1 (0 to 2)   | 0 (0 to 1) | -65.2% (-71.4% to -58.9%) |
| Spain     | Motorcyclist road injuries                      | 0 (0 to 0)   | 0 (0 to 0) | -40.8% (-52.8% to -25.5%) |
| Spain     | Non-venomous animal contact                     | 0 (0 to 0)   | 0 (0 to 0) | -13.8% (-17.4% to -10.2%) |
| Spain     | Other exposure to mechanical forces             | 1 (0 to 1)   | 0 (0 to 1) | -17.1% (-26.1% to -10%)   |
| Spain     | Other road injuries                             | 0 (0 to 0)   | 0 (0 to 0) | -22.3% (-35% to -7.7%)    |
| Spain     | Other transport injuries                        | 0 (0 to 0)   | 0 (0 to 0) | -7.8% (-12.5% to -2.7%)   |
| Spain     | Other unintentional injuries                    | 0 (0 to 1)   | 0 (0 to 0) | -29% (-35.1% to -23.3%)   |
| Spain     | Pedestrian road injuries                        | 0 (0 to 0)   | 0 (0 to 0) | -62% (-69.6% to -53.4%)   |
| Spain     | Physical violence by firearm                    | 0 (0 to 0)   | 0 (0 to 0) | 31.3% (18.5% to 47.6%)    |
| Spain     | Physical violence by other means                | 0 (0 to 0)   | 0 (0 to 0) | -19.1% (-28.2% to -11.2%) |
| Spain     | Physical violence by sharp object               | 0 (0 to 0)   | 0 (0 to 0) | -17.2% (-28.7% to -6.5%)  |
| Spain     | Poisoning by carbon monoxide                    | 0 (0 to 0)   | 0 (0 to 0) | 4.6% (-4.6% to 13.4%)     |
| Spain     | Poisoning by other means                        | 0 (0 to 0)   | 0 (0 to 0) | -10.4% (-16.5% to -4.6%)  |
| Spain     | Pulmonary aspiration and foreign body in airway | 0 (0 to 0)   | 0 (0 to 0) | -8.4% (-16.9% to 0.4%)    |
| Spain     | Self-harm by firearm                            | 0 (0 to 0)   | 0 (0 to 0) | 5.6% (-4.9% to 18.6%)     |
| Spain     | Self-harm by other specified means              | 0 (0 to 0)   | 0 (0 to 0) | -9.9% (-14.7% to -4.7%)   |
| Spain     | Unintentional firearm injuries                  | 0 (0 to 0)   | 0 (0 to 0) | -25.5% (-35.7% to -16.6%) |
| Spain     | Venomous animal contact                         | 0 (0 to 0)   | 0 (0 to 0) | -14% (-19.2% to -7.9%)    |
| Sri Lanka | Adverse effects of medical treatment            | 0 (0 to 0)   | 0 (0 to 0) | 0% (0% to 0%)             |
| Sri Lanka | Conflict and terrorism                          | 18 (4 to 54) | 1 (0 to 2) | NA                        |
| Sri Lanka | Cyclist road injuries                           | 0 (0 to 0)   | 0 (0 to 0) | 5.7% (-3.1% to 15.3%)     |
| Sri Lanka | Drowning                                        | 0 (0 to 0)   | 0 (0 to 0) | 43.3% (28% to 58.9%)      |
| Sri Lanka | Environmental heat and cold exposure            | 0 (0 to 0)   | 0 (0 to 0) | -17.2% (-23.2% to -11%)   |
| Sri Lanka | Executions and police conflict                  | 0 (0 to 0)   | 0 (0 to 0) | NA                        |
| Sri Lanka | Exposure to forces of nature                    | 0 (0 to 0)   | 0 (0 to 0) | NA                        |
| Sri Lanka | Falls                                           | 2 (1 to 3)   | 3 (2 to 4) | 57.6% (50.5% to 64.6%)    |
| Sri Lanka | Fire, heat, and hot substances                  | 0 (0 to 0)   | 0 (0 to 0) | -24.8% (-29.7% to -20.2%) |
| Sri Lanka | Foreign body in eyes                            | 0 (0 to 0)   | 0 (0 to 0) | 0% (0% to 0%)             |
| Sri Lanka | Foreign body in other body part                 | 0 (0 to 0)   | 0 (0 to 0) | -3.6% (-6.7% to -0.1%)    |
| Sri Lanka | Motor vehicle road injuries                     | 0 (0 to 1)   | 0 (0 to 1) | 6.2% (-2.5% to 15.5%)     |
| Sri Lanka | Motorcyclist road injuries                      | 0 (0 to 1)   | 0 (0 to 1) | 13.6% (4.1% to 25.6%)     |
| Sri Lanka | Non-venomous animal contact                     | 0 (0 to 0)   | 0 (0 to 0) | -46.4% (-51% to -41.8%)   |
| Sri Lanka | Other exposure to mechanical forces             | 0 (0 to 0)   | 0 (0 to 0) | -13.6% (-22.6% to -3.9%)  |
| Sri Lanka | Other road injuries                             | 0 (0 to 0)   | 0 (0 to 0) | 1.3% (-8.3% to 11.1%)     |
| Sri Lanka | Other transport injuries                        | 0 (0 to 0)   | 0 (0 to 0) | 1.5% (-4.3% to 7.2%)      |
| Sri Lanka | Other unintentional injuries                    | 0 (0 to 0)   | 0 (0 to 0) | -50.1% (-55% to -44.3%)   |
| Sri Lanka | Pedestrian road injuries                        | 0 (0 to 0)   | 0 (0 to 0) | -12.3% (-19.1% to -4.9%)  |
| Sri Lanka | Physical violence by firearm                    | 0 (0 to 0)   | 0 (0 to 0) | 30% (13.5% to 49.5%)      |
| Sri Lanka | Physical violence by other means                | 0 (0 to 1)   | 0 (0 to 0) | -24.7% (-31.8% to -17.5%) |
| Sri Lanka | Physical violence by sharp object               | 0 (0 to 0)   | 0 (0 to 0) | -35.5% (-43.7% to -28.3%) |
| Sri Lanka | Poisoning by carbon monoxide                    | 0 (0 to 0)   | 0 (0 to 0) | 12% (-0.4% to 25.1%)      |
| Sri Lanka | Poisoning by other means                        | 0 (0 to 0)   | 0 (0 to 0) | -25.3% (-32.5% to -17.4%) |
| Sri Lanka | Pulmonary aspiration and foreign body in airway | 0 (0 to 0)   | 0 (0 to 0) | -5% (-12.4% to 3.8%)      |



|           |                                                 |             |            |                           |
|-----------|-------------------------------------------------|-------------|------------|---------------------------|
| Sri Lanka | Self-harm by firearm                            | 0 (0 to 0)  | 0 (0 to 0) | -33.3% (-51% to -15.8%)   |
| Sri Lanka | Self-harm by other specified means              | 1 (0 to 1)  | 0 (0 to 1) | -45.4% (-49.2% to -41.2%) |
| Sri Lanka | Unintentional firearm injuries                  | 0 (0 to 0)  | 0 (0 to 0) | -37.6% (-47.4% to -30%)   |
| Sri Lanka | Venomous animal contact                         | 0 (0 to 0)  | 0 (0 to 0) | -51.8% (-57.9% to -45.4%) |
| Sudan     | Adverse effects of medical treatment            | 0 (0 to 0)  | 0 (0 to 0) | 0% (0% to 0%)             |
| Sudan     | Conflict and terrorism                          | 8 (1 to 24) | 0 (0 to 0) | NA                        |
| Sudan     | Cyclist road injuries                           | 0 (0 to 1)  | 0 (0 to 1) | 8.5% (1.7% to 17.1%)      |
| Sudan     | Drowning                                        | 0 (0 to 0)  | 0 (0 to 0) | 0.6% (-11.9% to 13.8%)    |
| Sudan     | Environmental heat and cold exposure            | 0 (0 to 0)  | 0 (0 to 0) | 1.9% (-3.5% to 7.7%)      |
| Sudan     | Executions and police conflict                  | 0 (0 to 0)  | 0 (0 to 1) | NA                        |
| Sudan     | Exposure to forces of nature                    | 0 (0 to 0)  | 0 (0 to 0) | NA                        |
| Sudan     | Falls                                           | 4 (2 to 5)  | 4 (3 to 6) | 24.2% (19.5% to 28.6%)    |
| Sudan     | Fire, heat, and hot substances                  | 0 (0 to 0)  | 0 (0 to 0) | -32.5% (-37.4% to -28%)   |
| Sudan     | Foreign body in eyes                            | 0 (0 to 0)  | 0 (0 to 0) | 0% (0% to 0%)             |
| Sudan     | Foreign body in other body part                 | 0 (0 to 1)  | 0 (0 to 1) | -1.4% (-4.2% to 1.6%)     |
| Sudan     | Motor vehicle road injuries                     | 1 (0 to 2)  | 1 (0 to 2) | -7.5% (-13.5% to -1.1%)   |
| Sudan     | Motorcyclist road injuries                      | 0 (0 to 1)  | 0 (0 to 1) | -1.5% (-10.4% to 8.5%)    |
| Sudan     | Non-venomous animal contact                     | 0 (0 to 0)  | 0 (0 to 0) | -9.8% (-14% to -5.3%)     |
| Sudan     | Other exposure to mechanical forces             | 0 (0 to 1)  | 0 (0 to 1) | -10.4% (-15.7% to -5.3%)  |
| Sudan     | Other road injuries                             | 0 (0 to 0)  | 0 (0 to 0) | 13.7% (5.1% to 23.6%)     |
| Sudan     | Other transport injuries                        | 0 (0 to 0)  | 0 (0 to 0) | 0.6% (-3.7% to 4.8%)      |
| Sudan     | Other unintentional injuries                    | 1 (0 to 1)  | 1 (0 to 1) | -22.6% (-26.3% to -18.3%) |
| Sudan     | Pedestrian road injuries                        | 1 (0 to 1)  | 1 (0 to 1) | -21.7% (-27.4% to -15.4%) |
| Sudan     | Physical violence by firearm                    | 0 (0 to 0)  | 0 (0 to 0) | 176.5% (132.2% to 245.9%) |
| Sudan     | Physical violence by other means                | 0 (0 to 0)  | 0 (0 to 0) | 73.8% (55.5% to 99%)      |
| Sudan     | Physical violence by sharp object               | 0 (0 to 0)  | 0 (0 to 0) | 54.7% (31% to 85.7%)      |
| Sudan     | Poisoning by carbon monoxide                    | 0 (0 to 0)  | 0 (0 to 0) | 18.6% (2.8% to 36.9%)     |
| Sudan     | Poisoning by other means                        | 0 (0 to 0)  | 0 (0 to 0) | -31.7% (-38.5% to -24.5%) |
| Sudan     | Pulmonary aspiration and foreign body in airway | 0 (0 to 0)  | 0 (0 to 0) | -27.7% (-35.7% to -20.1%) |
| Sudan     | Self-harm by firearm                            | 0 (0 to 0)  | 0 (0 to 0) | 27.6% (15.5% to 43%)      |
| Sudan     | Self-harm by other specified means              | 0 (0 to 0)  | 0 (0 to 0) | -1.1% (-6.8% to 5.6%)     |
| Sudan     | Unintentional firearm injuries                  | 0 (0 to 0)  | 0 (0 to 0) | -13.8% (-21.8% to -6.1%)  |
| Sudan     | Venomous animal contact                         | 0 (0 to 0)  | 0 (0 to 0) | -14.1% (-20.7% to -7.4%)  |
| Suriname  | Adverse effects of medical treatment            | 0 (0 to 0)  | 0 (0 to 0) | 0% (0% to 0%)             |
| Suriname  | Conflict and terrorism                          | 0 (0 to 0)  | 0 (0 to 0) | NA                        |
| Suriname  | Cyclist road injuries                           | 0 (0 to 1)  | 0 (0 to 0) | -20.3% (-29% to -10.1%)   |
| Suriname  | Drowning                                        | 0 (0 to 0)  | 0 (0 to 0) | 13.9% (3.2% to 27.6%)     |
| Suriname  | Environmental heat and cold exposure            | 0 (0 to 1)  | 0 (0 to 1) | 6.6% (2.3% to 10.2%)      |
| Suriname  | Executions and police conflict                  | 0 (0 to 0)  | 0 (0 to 0) | NA                        |
| Suriname  | Exposure to forces of nature                    | 0 (0 to 0)  | 0 (0 to 0) | NA                        |
| Suriname  | Falls                                           | 1 (1 to 1)  | 1 (1 to 2) | 47.1% (41.7% to 53%)      |
| Suriname  | Fire, heat, and hot substances                  | 0 (0 to 0)  | 0 (0 to 0) | -10% (-15.6% to -4.7%)    |
| Suriname  | Foreign body in eyes                            | 0 (0 to 0)  | 0 (0 to 0) | 0% (0% to 0%)             |

|          |                                                 |               |               |                           |
|----------|-------------------------------------------------|---------------|---------------|---------------------------|
| Suriname | Foreign body in other body part                 | 0 (0 to 0)    | 0 (0 to 0)    | 9.3% (3.7% to 14.8%)      |
| Suriname | Motor vehicle road injuries                     | 1 (0 to 1)    | 1 (0 to 1)    | -9.7% (-18.2% to -0.4%)   |
| Suriname | Motorcyclist road injuries                      | 0 (0 to 0)    | 0 (0 to 1)    | 31.5% (15% to 50%)        |
| Suriname | Non-venomous animal contact                     | 0 (0 to 0)    | 0 (0 to 0)    | 21.8% (11.1% to 33.1%)    |
| Suriname | Other exposure to mechanical forces             | 0 (0 to 0)    | 0 (0 to 1)    | 16.7% (8.9% to 24.8%)     |
| Suriname | Other road injuries                             | 0 (0 to 0)    | 0 (0 to 0)    | -1.3% (-12% to 10%)       |
| Suriname | Other transport injuries                        | 0 (0 to 0)    | 0 (0 to 0)    | 17.2% (11.5% to 23.8%)    |
| Suriname | Other unintentional injuries                    | 0 (0 to 0)    | 0 (0 to 0)    | 1.9% (-2.8% to 6.1%)      |
| Suriname | Pedestrian road injuries                        | 0 (0 to 0)    | 0 (0 to 0)    | -21.4% (-29.3% to -13.1%) |
| Suriname | Physical violence by firearm                    | 0 (0 to 0)    | 0 (0 to 0)    | 69.1% (51.9% to 90.5%)    |
| Suriname | Physical violence by other means                | 0 (0 to 0)    | 0 (0 to 0)    | 10.5% (1.4% to 20%)       |
| Suriname | Physical violence by sharp object               | 0 (0 to 0)    | 0 (0 to 0)    | 6.7% (-4.7% to 16.5%)     |
| Suriname | Poisoning by carbon monoxide                    | 0 (0 to 0)    | 0 (0 to 0)    | 28.2% (12.7% to 45.8%)    |
| Suriname | Poisoning by other means                        | 0 (0 to 0)    | 0 (0 to 0)    | -13.2% (-22.9% to -3%)    |
| Suriname | Pulmonary aspiration and foreign body in airway | 0 (0 to 0)    | 0 (0 to 0)    | -24.6% (-32.4% to -14.5%) |
| Suriname | Self-harm by firearm                            | 0 (0 to 0)    | 0 (0 to 0)    | 14.2% (-1.4% to 29.9%)    |
| Suriname | Self-harm by other specified means              | 0 (0 to 0)    | 0 (0 to 0)    | -2.3% (-9.3% to 4.7%)     |
| Suriname | Unintentional firearm injuries                  | 0 (0 to 0)    | 0 (0 to 0)    | 12% (2.3% to 21.1%)       |
| Suriname | Venomous animal contact                         | 0 (0 to 0)    | 0 (0 to 0)    | 41.3% (28.4% to 57.8%)    |
| Sweden   | Adverse effects of medical treatment            | 0 (0 to 0)    | 0 (0 to 0)    | 0% (0% to 0%)             |
| Sweden   | Conflict and terrorism                          | 0 (0 to 0)    | 0 (0 to 0)    | NA                        |
| Sweden   | Cyclist road injuries                           | 1 (0 to 1)    | 0 (0 to 1)    | -37.8% (-42.1% to -32.9%) |
| Sweden   | Drowning                                        | 0 (0 to 0)    | 0 (0 to 0)    | -4.6% (-10.3% to 1.6%)    |
| Sweden   | Environmental heat and cold exposure            | 0 (0 to 0)    | 0 (0 to 0)    | -13% (-17.2% to -9.5%)    |
| Sweden   | Executions and police conflict                  | 0 (0 to 0)    | 0 (0 to 0)    | NA                        |
| Sweden   | Exposure to forces of nature                    | 0 (0 to 0)    | 0 (0 to 0)    | NA                        |
| Sweden   | Falls                                           | 17 (11 to 27) | 19 (12 to 29) | 10.2% (6.3% to 14.3%)     |
| Sweden   | Fire, heat, and hot substances                  | 0 (0 to 0)    | 0 (0 to 0)    | -22.2% (-25.9% to -18.4%) |
| Sweden   | Foreign body in eyes                            | 0 (0 to 0)    | 0 (0 to 0)    | 0% (0% to 0%)             |
| Sweden   | Foreign body in other body part                 | 1 (0 to 1)    | 1 (0 to 1)    | 0.6% (-2.5% to 3.5%)      |
| Sweden   | Motor vehicle road injuries                     | 1 (0 to 2)    | 0 (0 to 1)    | -52.3% (-56.1% to -48.5%) |
| Sweden   | Motorcyclist road injuries                      | 0 (0 to 1)    | 0 (0 to 1)    | -18.4% (-25.1% to -10.4%) |
| Sweden   | Non-venomous animal contact                     | 0 (0 to 0)    | 0 (0 to 0)    | -10.1% (-13% to -7.3%)    |
| Sweden   | Other exposure to mechanical forces             | 1 (0 to 2)    | 1 (0 to 1)    | -13.3% (-17.6% to -9.6%)  |
| Sweden   | Other road injuries                             | 0 (0 to 0)    | 0 (0 to 0)    | -16.9% (-23.4% to -9%)    |
| Sweden   | Other transport injuries                        | 0 (0 to 1)    | 0 (0 to 1)    | -26.2% (-29.5% to -22.2%) |
| Sweden   | Other unintentional injuries                    | 1 (1 to 1)    | 1 (1 to 1)    | -2.1% (-5.3% to 1.2%)     |
| Sweden   | Pedestrian road injuries                        | 0 (0 to 1)    | 0 (0 to 0)    | -28.5% (-34.4% to -22.2%) |
| Sweden   | Physical violence by firearm                    | 0 (0 to 0)    | 0 (0 to 0)    | 30.9% (19.9% to 43.4%)    |
| Sweden   | Physical violence by other means                | 0 (0 to 1)    | 0 (0 to 1)    | 2.6% (-2% to 7%)          |
| Sweden   | Physical violence by sharp object               | 0 (0 to 0)    | 0 (0 to 0)    | -4.6% (-11.5% to 2.1%)    |
| Sweden   | Poisoning by carbon monoxide                    | 0 (0 to 0)    | 0 (0 to 0)    | 16.2% (7.7% to 25.3%)     |
| Sweden   | Poisoning by other means                        | 0 (0 to 0)    | 0 (0 to 0)    | -32.3% (-37.8% to -27.7%) |

|                      |                                                 |              |              |                           |
|----------------------|-------------------------------------------------|--------------|--------------|---------------------------|
| Sweden               | Pulmonary aspiration and foreign body in airway | 0 (0 to 0)   | 0 (0 to 0)   | -15.5% (-21.4% to -9.3%)  |
| Sweden               | Self-harm by firearm                            | 0 (0 to 0)   | 0 (0 to 0)   | -29.7% (-36.9% to -23.1%) |
| Sweden               | Self-harm by other specified means              | 0 (0 to 0)   | 0 (0 to 0)   | -27.1% (-30.2% to -23.6%) |
| Sweden               | Unintentional firearm injuries                  | 0 (0 to 0)   | 0 (0 to 0)   | 3% (-3.5% to 10.1%)       |
| Sweden               | Venomous animal contact                         | 0 (0 to 0)   | 0 (0 to 0)   | -9.2% (-14% to -4.2%)     |
| Switzerland          | Adverse effects of medical treatment            | 0 (0 to 0)   | 0 (0 to 0)   | 0% (0% to 0%)             |
| Switzerland          | Conflict and terrorism                          | 0 (0 to 0)   | 0 (0 to 0)   | NA                        |
| Switzerland          | Cyclist road injuries                           | 0 (0 to 1)   | 0 (0 to 0)   | -35.5% (-43.8% to -26.2%) |
| Switzerland          | Drowning                                        | 0 (0 to 0)   | 0 (0 to 0)   | 34.1% (20.5% to 45.8%)    |
| Switzerland          | Environmental heat and cold exposure            | 0 (0 to 0)   | 0 (0 to 0)   | 1.8% (-2.5% to 6.5%)      |
| Switzerland          | Executions and police conflict                  | 0 (0 to 0)   | 0 (0 to 0)   | NA                        |
| Switzerland          | Exposure to forces of nature                    | 0 (0 to 0)   | 0 (0 to 0)   | NA                        |
| Switzerland          | Falls                                           | 10 (7 to 13) | 9 (6 to 12)  | -11% (-15.1% to -6.8%)    |
| Switzerland          | Fire, heat, and hot substances                  | 0 (0 to 0)   | 0 (0 to 0)   | 2.1% (-2.7% to 6.2%)      |
| Switzerland          | Foreign body in eyes                            | 0 (0 to 0)   | 0 (0 to 0)   | 0% (0% to 0%)             |
| Switzerland          | Foreign body in other body part                 | 0 (0 to 0)   | 0 (0 to 0)   | 5.2% (1.5% to 8.6%)       |
| Switzerland          | Motor vehicle road injuries                     | 1 (0 to 1)   | 0 (0 to 1)   | -47.6% (-54.5% to -39.9%) |
| Switzerland          | Motorcyclist road injuries                      | 0 (0 to 0)   | 0 (0 to 0)   | -48.7% (-57.3% to -39.1%) |
| Switzerland          | Non-venomous animal contact                     | 0 (0 to 0)   | 0 (0 to 0)   | 3.7% (-0.5% to 8.2%)      |
| Switzerland          | Other exposure to mechanical forces             | 1 (0 to 2)   | 1 (0 to 1)   | -31% (-39.7% to -23.6%)   |
| Switzerland          | Other road injuries                             | 0 (0 to 0)   | 0 (0 to 0)   | -22.5% (-33.1% to -10.8%) |
| Switzerland          | Other transport injuries                        | 0 (0 to 0)   | 0 (0 to 0)   | -33% (-39% to -26.4%)     |
| Switzerland          | Other unintentional injuries                    | 0 (0 to 1)   | 0 (0 to 0)   | -49.2% (-55.6% to -42.1%) |
| Switzerland          | Pedestrian road injuries                        | 0 (0 to 0)   | 0 (0 to 0)   | -44.9% (-54.1% to -34.2%) |
| Switzerland          | Physical violence by firearm                    | 0 (0 to 0)   | 0 (0 to 0)   | 9.5% (-2.3% to 24%)       |
| Switzerland          | Physical violence by other means                | 0 (0 to 0)   | 0 (0 to 0)   | -20% (-27.4% to -12.5%)   |
| Switzerland          | Physical violence by sharp object               | 0 (0 to 0)   | 0 (0 to 0)   | -23.1% (-32.9% to -13.5%) |
| Switzerland          | Poisoning by carbon monoxide                    | 0 (0 to 0)   | 0 (0 to 0)   | 17.6% (8.6% to 26.2%)     |
| Switzerland          | Poisoning by other means                        | 0 (0 to 0)   | 0 (0 to 0)   | 6% (-0.9% to 13%)         |
| Switzerland          | Pulmonary aspiration and foreign body in airway | 0 (0 to 0)   | 0 (0 to 0)   | 1.5% (-6.4% to 10.9%)     |
| Switzerland          | Self-harm by firearm                            | 0 (0 to 0)   | 0 (0 to 0)   | -65.1% (-71.9% to -58.7%) |
| Switzerland          | Self-harm by other specified means              | 1 (0 to 1)   | 0 (0 to 1)   | -47% (-50.2% to -43%)     |
| Switzerland          | Unintentional firearm injuries                  | 0 (0 to 0)   | 0 (0 to 0)   | -24.1% (-34.9% to -14.4%) |
| Switzerland          | Venomous animal contact                         | 0 (0 to 0)   | 0 (0 to 0)   | -2.4% (-8.3% to 4.1%)     |
| Syrian Arab Republic | Adverse effects of medical treatment            | 0 (0 to 0)   | 0 (0 to 0)   | 0% (0% to 0%)             |
| Syrian Arab Republic | Conflict and terrorism                          | 0 (0 to 1)   | 21 (4 to 64) | NA                        |
| Syrian Arab Republic | Cyclist road injuries                           | 0 (0 to 0)   | 0 (0 to 0)   | -4% (-11.5% to 4%)        |
| Syrian Arab Republic | Drowning                                        | 0 (0 to 0)   | 0 (0 to 0)   | 120.8% (82.8% to 163.1%)  |
| Syrian Arab Republic | Environmental heat and cold exposure            | 0 (0 to 0)   | 0 (0 to 0)   | -6.5% (-11.6% to -1.4%)   |
| Syrian Arab Republic | Executions and police conflict                  | 0 (0 to 0)   | 1 (0 to 1)   | NA                        |
| Syrian Arab Republic | Exposure to forces of nature                    | 0 (0 to 0)   | 0 (0 to 0)   | NA                        |
| Syrian Arab Republic | Falls                                           | 2 (1 to 2)   | 2 (2 to 3)   | 47.8% (41.4% to 54.7%)    |
| Syrian Arab Republic | Fire, heat, and hot substances                  | 0 (0 to 0)   | 0 (0 to 0)   | -11.7% (-21.5% to -1.8%)  |

|                            |                                                 |            |            |                           |
|----------------------------|-------------------------------------------------|------------|------------|---------------------------|
| Syrian Arab Republic       | Foreign body in eyes                            | 0 (0 to 0) | 0 (0 to 0) | 0% (0% to 0%)             |
| Syrian Arab Republic       | Foreign body in other body part                 | 0 (0 to 0) | 0 (0 to 0) | -4.2% (-7.6% to -0.7%)    |
| Syrian Arab Republic       | Motor vehicle road injuries                     | 0 (0 to 1) | 0 (0 to 1) | -19.6% (-25.3% to -13.2%) |
| Syrian Arab Republic       | Motorcyclist road injuries                      | 0 (0 to 0) | 0 (0 to 0) | -9.3% (-17.6% to -0.3%)   |
| Syrian Arab Republic       | Non-venomous animal contact                     | 0 (0 to 0) | 0 (0 to 0) | 4.7% (0.1% to 8.5%)       |
| Syrian Arab Republic       | Other exposure to mechanical forces             | 0 (0 to 0) | 0 (0 to 0) | -6.8% (-17.8% to 2.4%)    |
| Syrian Arab Republic       | Other road injuries                             | 0 (0 to 0) | 0 (0 to 0) | -2.6% (-11.2% to 6.5%)    |
| Syrian Arab Republic       | Other transport injuries                        | 0 (0 to 0) | 0 (0 to 0) | -4.1% (-7.7% to -0.3%)    |
| Syrian Arab Republic       | Other unintentional injuries                    | 0 (0 to 0) | 0 (0 to 0) | -6.2% (-14% to 1.9%)      |
| Syrian Arab Republic       | Pedestrian road injuries                        | 0 (0 to 0) | 0 (0 to 0) | -29.9% (-35.6% to -23.9%) |
| Syrian Arab Republic       | Physical violence by firearm                    | 0 (0 to 0) | 0 (0 to 0) | 129.3% (98.8% to 171.1%)  |
| Syrian Arab Republic       | Physical violence by other means                | 0 (0 to 0) | 0 (0 to 0) | 6.6% (-3.3% to 15.9%)     |
| Syrian Arab Republic       | Physical violence by sharp object               | 0 (0 to 0) | 0 (0 to 0) | -6.6% (-18.2% to 4.1%)    |
| Syrian Arab Republic       | Poisoning by carbon monoxide                    | 0 (0 to 0) | 0 (0 to 0) | 42.4% (29.4% to 57.4%)    |
| Syrian Arab Republic       | Poisoning by other means                        | 0 (0 to 0) | 0 (0 to 0) | -10.5% (-17.9% to -1.6%)  |
| Syrian Arab Republic       | Pulmonary aspiration and foreign body in airway | 0 (0 to 0) | 0 (0 to 0) | -20.5% (-29.2% to -12.5%) |
| Syrian Arab Republic       | Self-harm by firearm                            | 0 (0 to 0) | 0 (0 to 0) | 39.7% (26.8% to 53.7%)    |
| Syrian Arab Republic       | Self-harm by other specified means              | 0 (0 to 0) | 0 (0 to 0) | 18% (9.9% to 25.3%)       |
| Syrian Arab Republic       | Unintentional firearm injuries                  | 0 (0 to 0) | 0 (0 to 0) | -6.3% (-18.3% to 5.1%)    |
| Syrian Arab Republic       | Venomous animal contact                         | 0 (0 to 0) | 0 (0 to 0) | 7% (-0.8% to 14.8%)       |
| Taiwan (Province of China) | Adverse effects of medical treatment            | 0 (0 to 0) | 0 (0 to 0) | 0% (0% to 0%)             |
| Taiwan (Province of China) | Conflict and terrorism                          | 0 (0 to 0) | 0 (0 to 0) | NA                        |
| Taiwan (Province of China) | Cyclist road injuries                           | 0 (0 to 0) | 0 (0 to 0) | 51.8% (21.8% to 95%)      |
| Taiwan (Province of China) | Drowning                                        | 0 (0 to 0) | 0 (0 to 0) | 12.4% (-2.5% to 34.4%)    |
| Taiwan (Province of China) | Environmental heat and cold exposure            | 0 (0 to 0) | 0 (0 to 0) | 5.3% (-0.9% to 12%)       |
| Taiwan (Province of China) | Executions and police conflict                  | 0 (0 to 0) | 0 (0 to 0) | NA                        |
| Taiwan (Province of China) | Exposure to forces of nature                    | 0 (0 to 0) | 0 (0 to 0) | NA                        |
| Taiwan (Province of China) | Falls                                           | 2 (2 to 3) | 2 (1 to 2) | -32.6% (-35.9% to -29.5%) |
| Taiwan (Province of China) | Fire, heat, and hot substances                  | 0 (0 to 0) | 0 (0 to 0) | -40.6% (-48.6% to -33.1%) |
| Taiwan (Province of China) | Foreign body in eyes                            | 0 (0 to 0) | 0 (0 to 0) | 0% (0% to 0%)             |
| Taiwan (Province of China) | Foreign body in other body part                 | 0 (0 to 0) | 0 (0 to 0) | 2% (-1.8% to 6%)          |
| Taiwan (Province of China) | Motor vehicle road injuries                     | 1 (0 to 1) | 0 (0 to 0) | -66.8% (-73.4% to -59%)   |
| Taiwan (Province of China) | Motorcyclist road injuries                      | 0 (0 to 1) | 0 (0 to 1) | 61.2% (33.4% to 103.2%)   |
| Taiwan (Province of China) | Non-venomous animal contact                     | 0 (0 to 0) | 0 (0 to 0) | -23.4% (-26.8% to -19.7%) |
| Taiwan (Province of China) | Other exposure to mechanical forces             | 0 (0 to 0) | 0 (0 to 0) | 51.9% (37% to 69.4%)      |
| Taiwan (Province of China) | Other road injuries                             | 0 (0 to 0) | 0 (0 to 0) | 119.8% (70.9% to 185.4%)  |
| Taiwan (Province of China) | Other transport injuries                        | 0 (0 to 0) | 0 (0 to 0) | 7.5% (2.4% to 12.8%)      |
| Taiwan (Province of China) | Other unintentional injuries                    | 0 (0 to 0) | 0 (0 to 0) | -75.5% (-79.8% to -70.8%) |
| Taiwan (Province of China) | Pedestrian road injuries                        | 0 (0 to 0) | 0 (0 to 0) | -13.9% (-28.8% to 3.7%)   |
| Taiwan (Province of China) | Physical violence by firearm                    | 0 (0 to 0) | 0 (0 to 0) | 35.2% (16.6% to 54.5%)    |
| Taiwan (Province of China) | Physical violence by other means                | 0 (0 to 0) | 0 (0 to 0) | -13.4% (-25.5% to -0.4%)  |
| Taiwan (Province of China) | Physical violence by sharp object               | 0 (0 to 0) | 0 (0 to 0) | -51.6% (-62.2% to -40.7%) |
| Taiwan (Province of China) | Poisoning by carbon monoxide                    | 0 (0 to 0) | 0 (0 to 0) | 69% (44.2% to 99.8%)      |

|                            |                                                 |            |            |                           |
|----------------------------|-------------------------------------------------|------------|------------|---------------------------|
| Taiwan (Province of China) | Poisoning by other means                        | 0 (0 to 0) | 0 (0 to 0) | -45.3% (-57.9% to -30.5%) |
| Taiwan (Province of China) | Pulmonary aspiration and foreign body in airway | 0 (0 to 0) | 0 (0 to 0) | -17.4% (-29.5% to -3.2%)  |
| Taiwan (Province of China) | Self-harm by firearm                            | 0 (0 to 0) | 0 (0 to 0) | 32.6% (16.5% to 49.6%)    |
| Taiwan (Province of China) | Self-harm by other specified means              | 0 (0 to 0) | 0 (0 to 0) | 38% (29.2% to 48.4%)      |
| Taiwan (Province of China) | Unintentional firearm injuries                  | 0 (0 to 0) | 0 (0 to 0) | 14.8% (2.4% to 26.7%)     |
| Taiwan (Province of China) | Venomous animal contact                         | 0 (0 to 0) | 0 (0 to 0) | -25.1% (-30.5% to -19.7%) |
| Tajikistan                 | Adverse effects of medical treatment            | 0 (0 to 0) | 0 (0 to 0) | 0% (0% to 0%)             |
| Tajikistan                 | Conflict and terrorism                          | 0 (0 to 0) | 0 (0 to 0) | NA                        |
| Tajikistan                 | Cyclist road injuries                           | 0 (0 to 0) | 0 (0 to 0) | -18.1% (-24.9% to -11%)   |
| Tajikistan                 | Drowning                                        | 0 (0 to 0) | 0 (0 to 0) | -6% (-15.8% to 2.8%)      |
| Tajikistan                 | Environmental heat and cold exposure            | 0 (0 to 0) | 0 (0 to 0) | 1.4% (-3.6% to 6.7%)      |
| Tajikistan                 | Executions and police conflict                  | 0 (0 to 0) | 0 (0 to 0) | NA                        |
| Tajikistan                 | Exposure to forces of nature                    | 0 (0 to 1) | 0 (0 to 0) | NA                        |
| Tajikistan                 | Falls                                           | 3 (2 to 4) | 2 (2 to 3) | -20.6% (-24.8% to -16.4%) |
| Tajikistan                 | Fire, heat, and hot substances                  | 0 (0 to 0) | 0 (0 to 0) | -34.7% (-39.7% to -30.2%) |
| Tajikistan                 | Foreign body in eyes                            | 0 (0 to 0) | 0 (0 to 0) | 0% (0% to 0%)             |
| Tajikistan                 | Foreign body in other body part                 | 0 (0 to 0) | 0 (0 to 0) | 1.4% (-3% to 5.7%)        |
| Tajikistan                 | Motor vehicle road injuries                     | 1 (0 to 1) | 1 (0 to 1) | -25.9% (-31% to -21%)     |
| Tajikistan                 | Motorcyclist road injuries                      | 0 (0 to 0) | 0 (0 to 0) | -45.4% (-51.8% to -38.8%) |
| Tajikistan                 | Non-venomous animal contact                     | 0 (0 to 0) | 0 (0 to 0) | 12.9% (8.5% to 17.6%)     |
| Tajikistan                 | Other exposure to mechanical forces             | 1 (0 to 1) | 1 (0 to 1) | 3.8% (-1.5% to 8.9%)      |
| Tajikistan                 | Other road injuries                             | 0 (0 to 0) | 0 (0 to 0) | -19% (-26.4% to -11%)     |
| Tajikistan                 | Other transport injuries                        | 0 (0 to 0) | 0 (0 to 0) | -1.8% (-6.3% to 2.8%)     |
| Tajikistan                 | Other unintentional injuries                    | 0 (0 to 0) | 0 (0 to 0) | -7% (-12.7% to -2.4%)     |
| Tajikistan                 | Pedestrian road injuries                        | 0 (0 to 0) | 0 (0 to 0) | -18.9% (-25.5% to -11.6%) |
| Tajikistan                 | Physical violence by firearm                    | 0 (0 to 0) | 0 (0 to 0) | -10.1% (-27% to 9.4%)     |
| Tajikistan                 | Physical violence by other means                | 0 (0 to 1) | 0 (0 to 0) | -57.6% (-62.8% to -52.1%) |
| Tajikistan                 | Physical violence by sharp object               | 0 (0 to 0) | 0 (0 to 0) | -55.1% (-61.4% to -47.9%) |
| Tajikistan                 | Poisoning by carbon monoxide                    | 0 (0 to 0) | 0 (0 to 0) | -7.9% (-27.7% to 13.5%)   |
| Tajikistan                 | Poisoning by other means                        | 0 (0 to 0) | 0 (0 to 0) | -11.6% (-23.7% to 0.1%)   |
| Tajikistan                 | Pulmonary aspiration and foreign body in airway | 0 (0 to 0) | 0 (0 to 0) | -0.6% (-8.7% to 7.6%)     |
| Tajikistan                 | Self-harm by firearm                            | 0 (0 to 0) | 0 (0 to 0) | 3.3% (-11.3% to 20.6%)    |
| Tajikistan                 | Self-harm by other specified means              | 0 (0 to 0) | 0 (0 to 0) | -5.8% (-10.5% to -0.9%)   |
| Tajikistan                 | Unintentional firearm injuries                  | 0 (0 to 0) | 0 (0 to 0) | -5.7% (-13% to 1.5%)      |
| Tajikistan                 | Venomous animal contact                         | 0 (0 to 0) | 0 (0 to 0) | 12.2% (6.2% to 19%)       |
| Thailand                   | Adverse effects of medical treatment            | 0 (0 to 0) | 0 (0 to 0) | 0% (0% to 0%)             |
| Thailand                   | Conflict and terrorism                          | 0 (0 to 0) | 0 (0 to 0) | NA                        |
| Thailand                   | Cyclist road injuries                           | 0 (0 to 0) | 0 (0 to 0) | -20.2% (-28.7% to -10.2%) |
| Thailand                   | Drowning                                        | 0 (0 to 0) | 0 (0 to 0) | 22.8% (10.2% to 36.4%)    |
| Thailand                   | Environmental heat and cold exposure            | 0 (0 to 0) | 0 (0 to 0) | 2.9% (-1.7% to 8.3%)      |
| Thailand                   | Executions and police conflict                  | 0 (0 to 0) | 0 (0 to 0) | NA                        |
| Thailand                   | Exposure to forces of nature                    | 0 (0 to 0) | 0 (0 to 0) | NA                        |
| Thailand                   | Falls                                           | 2 (1 to 2) | 2 (2 to 3) | 33.8% (28.4% to 39.5%)    |

|             |                                                 |              |            |                           |
|-------------|-------------------------------------------------|--------------|------------|---------------------------|
| Thailand    | Fire, heat, and hot substances                  | 0 (0 to 0)   | 0 (0 to 0) | -6.3% (-11.3% to -1.3%)   |
| Thailand    | Foreign body in eyes                            | 0 (0 to 0)   | 0 (0 to 0) | 0% (0% to 0%)             |
| Thailand    | Foreign body in other body part                 | 0 (0 to 0)   | 0 (0 to 0) | 3.6% (-2.3% to 9.1%)      |
| Thailand    | Motor vehicle road injuries                     | 1 (0 to 1)   | 0 (0 to 1) | -26.4% (-33.8% to -18.4%) |
| Thailand    | Motorcyclist road injuries                      | 1 (1 to 2)   | 1 (0 to 1) | -23.2% (-30% to -15.2%)   |
| Thailand    | Non-venomous animal contact                     | 0 (0 to 0)   | 0 (0 to 0) | -29.8% (-34.6% to -24.3%) |
| Thailand    | Other exposure to mechanical forces             | 0 (0 to 0)   | 0 (0 to 0) | -31.2% (-37.8% to -25.1%) |
| Thailand    | Other road injuries                             | 0 (0 to 0)   | 0 (0 to 0) | -35.2% (-44.7% to -25.1%) |
| Thailand    | Other transport injuries                        | 0 (0 to 0)   | 0 (0 to 0) | -20.7% (-25.4% to -16.4%) |
| Thailand    | Other unintentional injuries                    | 0 (0 to 0)   | 0 (0 to 0) | -19.8% (-26% to -13.1%)   |
| Thailand    | Pedestrian road injuries                        | 0 (0 to 0)   | 0 (0 to 0) | -56.3% (-60.7% to -51.4%) |
| Thailand    | Physical violence by firearm                    | 0 (0 to 0)   | 0 (0 to 0) | -34.5% (-42.4% to -24.4%) |
| Thailand    | Physical violence by other means                | 0 (0 to 1)   | 0 (0 to 0) | -43.5% (-48% to -38.7%)   |
| Thailand    | Physical violence by sharp object               | 0 (0 to 0)   | 0 (0 to 0) | -51.4% (-56.7% to -45.5%) |
| Thailand    | Poisoning by carbon monoxide                    | 0 (0 to 0)   | 0 (0 to 0) | 30% (16.3% to 46.3%)      |
| Thailand    | Poisoning by other means                        | 0 (0 to 0)   | 0 (0 to 0) | -9.6% (-17.1% to -1.7%)   |
| Thailand    | Pulmonary aspiration and foreign body in airway | 0 (0 to 0)   | 0 (0 to 0) | -22.6% (-32.4% to -10.4%) |
| Thailand    | Self-harm by firearm                            | 0 (0 to 0)   | 0 (0 to 0) | -34.7% (-52.9% to -15.2%) |
| Thailand    | Self-harm by other specified means              | 0 (0 to 1)   | 0 (0 to 0) | -30.9% (-35.9% to -25.1%) |
| Thailand    | Unintentional firearm injuries                  | 0 (0 to 0)   | 0 (0 to 0) | -24.8% (-31.8% to -17.3%) |
| Thailand    | Venomous animal contact                         | 0 (0 to 0)   | 0 (0 to 0) | -39.2% (-46.1% to -32.7%) |
| Timor-Leste | Adverse effects of medical treatment            | 0 (0 to 0)   | 0 (0 to 0) | 0% (0% to 0%)             |
| Timor-Leste | Conflict and terrorism                          | 14 (3 to 41) | 0 (0 to 0) | NA                        |
| Timor-Leste | Cyclist road injuries                           | 0 (0 to 0)   | 0 (0 to 0) | -4.4% (-12.9% to 5.6%)    |
| Timor-Leste | Drowning                                        | 0 (0 to 0)   | 0 (0 to 0) | -23.8% (-29.6% to -17.9%) |
| Timor-Leste | Environmental heat and cold exposure            | 0 (0 to 0)   | 0 (0 to 0) | -0.8% (-5.6% to 4.3%)     |
| Timor-Leste | Executions and police conflict                  | 0 (0 to 0)   | 0 (0 to 0) | NA                        |
| Timor-Leste | Exposure to forces of nature                    | 0 (0 to 0)   | 0 (0 to 0) | NA                        |
| Timor-Leste | Falls                                           | 1 (1 to 1)   | 1 (1 to 2) | 54% (48.5% to 59.4%)      |
| Timor-Leste | Fire, heat, and hot substances                  | 0 (0 to 0)   | 0 (0 to 0) | -22.7% (-28.6% to -17.5%) |
| Timor-Leste | Foreign body in eyes                            | 0 (0 to 0)   | 0 (0 to 0) | 0% (0% to 0%)             |
| Timor-Leste | Foreign body in other body part                 | 0 (0 to 0)   | 0 (0 to 0) | -8.5% (-11.7% to -4.7%)   |
| Timor-Leste | Motor vehicle road injuries                     | 0 (0 to 1)   | 0 (0 to 1) | -7.3% (-16.4% to 1.4%)    |
| Timor-Leste | Motorcyclist road injuries                      | 0 (0 to 1)   | 0 (0 to 1) | 58.1% (42.1% to 78.3%)    |
| Timor-Leste | Non-venomous animal contact                     | 0 (0 to 0)   | 0 (0 to 0) | -31.5% (-35.9% to -27.4%) |
| Timor-Leste | Other exposure to mechanical forces             | 0 (0 to 0)   | 0 (0 to 0) | -17.8% (-23.1% to -13%)   |
| Timor-Leste | Other road injuries                             | 0 (0 to 0)   | 0 (0 to 0) | -2.5% (-13.1% to 9%)      |
| Timor-Leste | Other transport injuries                        | 0 (0 to 0)   | 0 (0 to 0) | -2.8% (-7.7% to 2%)       |
| Timor-Leste | Other unintentional injuries                    | 0 (0 to 0)   | 0 (0 to 0) | -22% (-26.8% to -17%)     |
| Timor-Leste | Pedestrian road injuries                        | 0 (0 to 0)   | 0 (0 to 0) | -18.7% (-26% to -10.9%)   |
| Timor-Leste | Physical violence by firearm                    | 0 (0 to 0)   | 0 (0 to 0) | 22.7% (9.3% to 37.3%)     |
| Timor-Leste | Physical violence by other means                | 0 (0 to 0)   | 0 (0 to 0) | -3.7% (-10.5% to 3.5%)    |
| Timor-Leste | Physical violence by sharp object               | 0 (0 to 0)   | 0 (0 to 0) | -6.3% (-14.4% to 1.8%)    |



|             |                                                 |            |            |                           |
|-------------|-------------------------------------------------|------------|------------|---------------------------|
| Timor-Leste | Poisoning by carbon monoxide                    | 0 (0 to 0) | 0 (0 to 0) | 31% (14.3% to 47.9%)      |
| Timor-Leste | Poisoning by other means                        | 0 (0 to 0) | 0 (0 to 0) | -13.5% (-19.6% to -6%)    |
| Timor-Leste | Pulmonary aspiration and foreign body in airway | 0 (0 to 0) | 0 (0 to 0) | -26.1% (-34.2% to -17.3%) |
| Timor-Leste | Self-harm by firearm                            | 0 (0 to 0) | 0 (0 to 0) | 33.5% (12.1% to 57.1%)    |
| Timor-Leste | Self-harm by other specified means              | 0 (0 to 0) | 0 (0 to 0) | -12.7% (-17.7% to -6%)    |
| Timor-Leste | Unintentional firearm injuries                  | 0 (0 to 0) | 0 (0 to 0) | -15.8% (-22% to -9.5%)    |
| Timor-Leste | Venomous animal contact                         | 0 (0 to 0) | 0 (0 to 0) | -40.5% (-48.1% to -33.4%) |
| Togo        | Adverse effects of medical treatment            | 0 (0 to 0) | 0 (0 to 0) | 0% (0% to 0%)             |
| Togo        | Conflict and terrorism                          | 0 (0 to 0) | 0 (0 to 0) | NA                        |
| Togo        | Cyclist road injuries                           | 1 (1 to 2) | 1 (1 to 3) | 14% (6.7% to 22.8%)       |
| Togo        | Drowning                                        | 0 (0 to 0) | 0 (0 to 0) | -8.4% (-15.2% to -1.6%)   |
| Togo        | Environmental heat and cold exposure            | 0 (0 to 0) | 0 (0 to 0) | 3.2% (-1.6% to 8.6%)      |
| Togo        | Executions and police conflict                  | 0 (0 to 0) | 0 (0 to 0) | NA                        |
| Togo        | Exposure to forces of nature                    | 0 (0 to 0) | 0 (0 to 0) | NA                        |
| Togo        | Falls                                           | 3 (2 to 4) | 3 (2 to 5) | 10.9% (7.1% to 15.1%)     |
| Togo        | Fire, heat, and hot substances                  | 0 (0 to 0) | 0 (0 to 0) | -6.2% (-11.6% to -1.2%)   |
| Togo        | Foreign body in eyes                            | 0 (0 to 0) | 0 (0 to 0) | 0% (0% to 0%)             |
| Togo        | Foreign body in other body part                 | 1 (0 to 1) | 1 (0 to 1) | 3.4% (-0.2% to 7.2%)      |
| Togo        | Motor vehicle road injuries                     | 2 (1 to 3) | 2 (1 to 3) | 3.3% (-4.3% to 11.3%)     |
| Togo        | Motorcyclist road injuries                      | 1 (0 to 1) | 1 (0 to 2) | 20.8% (11.3% to 30.5%)    |
| Togo        | Non-venomous animal contact                     | 0 (0 to 0) | 0 (0 to 0) | 2.3% (-2% to 6.5%)        |
| Togo        | Other exposure to mechanical forces             | 0 (0 to 0) | 0 (0 to 0) | -10.4% (-15.5% to -4.6%)  |
| Togo        | Other road injuries                             | 0 (0 to 0) | 0 (0 to 0) | 2.7% (-6% to 12.2%)       |
| Togo        | Other transport injuries                        | 0 (0 to 1) | 0 (0 to 1) | -8.3% (-12.4% to -4.5%)   |
| Togo        | Other unintentional injuries                    | 0 (0 to 0) | 0 (0 to 0) | -8.9% (-14.1% to -2.6%)   |
| Togo        | Pedestrian road injuries                        | 2 (1 to 4) | 2 (1 to 3) | -8.6% (-14.7% to -2.5%)   |
| Togo        | Physical violence by firearm                    | 0 (0 to 0) | 0 (0 to 0) | 34.4% (22.1% to 47.9%)    |
| Togo        | Physical violence by other means                | 0 (0 to 0) | 0 (0 to 0) | 12.1% (5.7% to 18.8%)     |
| Togo        | Physical violence by sharp object               | 0 (0 to 0) | 0 (0 to 0) | 12% (3.8% to 21%)         |
| Togo        | Poisoning by carbon monoxide                    | 0 (0 to 0) | 0 (0 to 0) | 12.9% (-0.5% to 28%)      |
| Togo        | Poisoning by other means                        | 0 (0 to 0) | 0 (0 to 0) | -14.3% (-22.1% to -6%)    |
| Togo        | Pulmonary aspiration and foreign body in airway | 0 (0 to 0) | 0 (0 to 0) | -1.3% (-10% to 8.3%)      |
| Togo        | Self-harm by firearm                            | 0 (0 to 0) | 0 (0 to 0) | 19.2% (7.8% to 32.3%)     |
| Togo        | Self-harm by other specified means              | 0 (0 to 0) | 0 (0 to 0) | 14.2% (9% to 20.2%)       |
| Togo        | Unintentional firearm injuries                  | 0 (0 to 0) | 0 (0 to 0) | -12.6% (-19.7% to -5%)    |
| Togo        | Venomous animal contact                         | 0 (0 to 0) | 0 (0 to 0) | 1.3% (-5.1% to 7.9%)      |
| Tokelau     | Adverse effects of medical treatment            | 0 (0 to 0) | 0 (0 to 0) | 0% (0% to 0%)             |
| Tokelau     | Conflict and terrorism                          | 0 (0 to 0) | 0 (0 to 0) | NA                        |
| Tokelau     | Cyclist road injuries                           | 0 (0 to 1) | 0 (0 to 1) | 11.3% (3.7% to 19.1%)     |
| Tokelau     | Drowning                                        | 0 (0 to 0) | 0 (0 to 0) | 37.8% (22.8% to 53.2%)    |
| Tokelau     | Environmental heat and cold exposure            | 0 (0 to 0) | 0 (0 to 0) | -2.7% (-7.5% to 2.6%)     |
| Tokelau     | Executions and police conflict                  | 0 (0 to 0) | 0 (0 to 0) | NA                        |
| Tokelau     | Exposure to forces of nature                    | 0 (0 to 0) | 0 (0 to 0) | NA                        |

|         |                                                 |            |            |                           |
|---------|-------------------------------------------------|------------|------------|---------------------------|
| Tokelau | Falls                                           | 3 (2 to 4) | 5 (3 to 7) | 62.6% (56% to 68.8%)      |
| Tokelau | Fire, heat, and hot substances                  | 0 (0 to 0) | 0 (0 to 0) | 14.1% (7.6% to 20.8%)     |
| Tokelau | Foreign body in eyes                            | 0 (0 to 0) | 0 (0 to 0) | 0% (0% to 0%)             |
| Tokelau | Foreign body in other body part                 | 0 (0 to 0) | 0 (0 to 0) | -0.5% (-4.1% to 3.5%)     |
| Tokelau | Motor vehicle road injuries                     | 1 (0 to 2) | 1 (0 to 2) | -8.1% (-14.8% to -1.6%)   |
| Tokelau | Motorcyclist road injuries                      | 1 (0 to 1) | 1 (0 to 1) | 8.4% (0.3% to 16.8%)      |
| Tokelau | Non-venomous animal contact                     | 0 (0 to 0) | 0 (0 to 0) | -19.9% (-24.1% to -15.5%) |
| Tokelau | Other exposure to mechanical forces             | 0 (0 to 0) | 0 (0 to 0) | -11.7% (-16.5% to -6.7%)  |
| Tokelau | Other road injuries                             | 0 (0 to 0) | 0 (0 to 0) | 12.3% (1.6% to 22.9%)     |
| Tokelau | Other transport injuries                        | 0 (0 to 1) | 0 (0 to 0) | -7.6% (-12.9% to -2.6%)   |
| Tokelau | Other unintentional injuries                    | 0 (0 to 0) | 0 (0 to 0) | -7.8% (-12% to -3.5%)     |
| Tokelau | Pedestrian road injuries                        | 1 (0 to 1) | 1 (0 to 1) | -9.5% (-16.1% to -2.3%)   |
| Tokelau | Physical violence by firearm                    | 0 (0 to 0) | 0 (0 to 0) | 61.1% (40.1% to 85.6%)    |
| Tokelau | Physical violence by other means                | 1 (0 to 1) | 1 (0 to 1) | 0.8% (-4.6% to 6%)        |
| Tokelau | Physical violence by sharp object               | 0 (0 to 0) | 0 (0 to 0) | -12.8% (-21.2% to -3.2%)  |
| Tokelau | Poisoning by carbon monoxide                    | 0 (0 to 0) | 0 (0 to 0) | 18.7% (6.9% to 30.6%)     |
| Tokelau | Poisoning by other means                        | 0 (0 to 0) | 0 (0 to 0) | -11.1% (-18.7% to -3.4%)  |
| Tokelau | Pulmonary aspiration and foreign body in airway | 0 (0 to 0) | 0 (0 to 0) | -12.1% (-21.1% to -3.2%)  |
| Tokelau | Self-harm by firearm                            | 0 (0 to 0) | 0 (0 to 0) | 6.9% (-6.2% to 25.6%)     |
| Tokelau | Self-harm by other specified means              | 0 (0 to 0) | 0 (0 to 0) | -9.5% (-14.9% to -3.3%)   |
| Tokelau | Unintentional firearm injuries                  | 0 (0 to 0) | 0 (0 to 0) | -16.3% (-23.8% to -9.3%)  |
| Tokelau | Venomous animal contact                         | 0 (0 to 0) | 0 (0 to 0) | -16.8% (-22.5% to -9.3%)  |
| Tonga   | Adverse effects of medical treatment            | 0 (0 to 0) | 0 (0 to 0) | 0% (0% to 0%)             |
| Tonga   | Conflict and terrorism                          | 0 (0 to 0) | 0 (0 to 0) | NA                        |
| Tonga   | Cyclist road injuries                           | 0 (0 to 0) | 0 (0 to 0) | 11.9% (3.9% to 20.4%)     |
| Tonga   | Drowning                                        | 0 (0 to 0) | 0 (0 to 0) | 26.9% (14% to 42%)        |
| Tonga   | Environmental heat and cold exposure            | 0 (0 to 0) | 0 (0 to 0) | -1.6% (-6.5% to 4%)       |
| Tonga   | Executions and police conflict                  | 0 (0 to 0) | 0 (0 to 0) | NA                        |
| Tonga   | Exposure to forces of nature                    | 0 (0 to 1) | 0 (0 to 0) | NA                        |
| Tonga   | Falls                                           | 1 (1 to 1) | 1 (1 to 2) | 39% (34.1% to 44.8%)      |
| Tonga   | Fire, heat, and hot substances                  | 0 (0 to 0) | 0 (0 to 0) | -5.1% (-10% to 0.3%)      |
| Tonga   | Foreign body in eyes                            | 0 (0 to 0) | 0 (0 to 0) | 0% (0% to 0%)             |
| Tonga   | Foreign body in other body part                 | 0 (0 to 0) | 0 (0 to 0) | -3.3% (-6.4% to 0.4%)     |
| Tonga   | Motor vehicle road injuries                     | 0 (0 to 1) | 0 (0 to 1) | 1.5% (-5.5% to 8.7%)      |
| Tonga   | Motorcyclist road injuries                      | 0 (0 to 0) | 0 (0 to 0) | 14.9% (5.8% to 25.4%)     |
| Tonga   | Non-venomous animal contact                     | 0 (0 to 0) | 0 (0 to 0) | -13.7% (-17.3% to -9.1%)  |
| Tonga   | Other exposure to mechanical forces             | 0 (0 to 0) | 0 (0 to 0) | -8.4% (-14% to -2.8%)     |
| Tonga   | Other road injuries                             | 0 (0 to 0) | 0 (0 to 0) | 10.9% (0.5% to 21.4%)     |
| Tonga   | Other transport injuries                        | 0 (0 to 0) | 0 (0 to 0) | -11.3% (-15.9% to -6.7%)  |
| Tonga   | Other unintentional injuries                    | 0 (0 to 0) | 0 (0 to 0) | -14.7% (-18.7% to -10.3%) |
| Tonga   | Pedestrian road injuries                        | 0 (0 to 0) | 0 (0 to 0) | -9.7% (-16.9% to -1.6%)   |
| Tonga   | Physical violence by firearm                    | 0 (0 to 0) | 0 (0 to 0) | -24.7% (-39.3% to -6.7%)  |
| Tonga   | Physical violence by other means                | 1 (0 to 1) | 0 (0 to 0) | -51% (-55.3% to -46.3%)   |

|                     |                                                 |            |            |                           |
|---------------------|-------------------------------------------------|------------|------------|---------------------------|
| Tonga               | Physical violence by sharp object               | 0 (0 to 0) | 0 (0 to 0) | -55.6% (-61.9% to -48.8%) |
| Tonga               | Poisoning by carbon monoxide                    | 0 (0 to 0) | 0 (0 to 0) | 12.5% (3.3% to 24.1%)     |
| Tonga               | Poisoning by other means                        | 0 (0 to 0) | 0 (0 to 0) | -15.3% (-21.2% to -9.8%)  |
| Tonga               | Pulmonary aspiration and foreign body in airway | 0 (0 to 0) | 0 (0 to 0) | -0.8% (-9.2% to 8.9%)     |
| Tonga               | Self-harm by firearm                            | 0 (0 to 0) | 0 (0 to 0) | 23.9% (11.2% to 41.2%)    |
| Tonga               | Self-harm by other specified means              | 0 (0 to 0) | 0 (0 to 0) | 13.4% (6.3% to 21.7%)     |
| Tonga               | Unintentional firearm injuries                  | 0 (0 to 0) | 0 (0 to 0) | -4.4% (-9.9% to 0.9%)     |
| Tonga               | Venomous animal contact                         | 0 (0 to 0) | 0 (0 to 0) | -11.5% (-17% to -5.5%)    |
| Trinidad and Tobago | Adverse effects of medical treatment            | 0 (0 to 0) | 0 (0 to 0) | 0% (0% to 0%)             |
| Trinidad and Tobago | Conflict and terrorism                          | 1 (0 to 4) | 0 (0 to 0) | NA                        |
| Trinidad and Tobago | Cyclist road injuries                           | 0 (0 to 0) | 0 (0 to 0) | -10.4% (-21.1% to 1.5%)   |
| Trinidad and Tobago | Drowning                                        | 0 (0 to 0) | 0 (0 to 0) | 7% (-5.8% to 21.1%)       |
| Trinidad and Tobago | Environmental heat and cold exposure            | 0 (0 to 1) | 0 (0 to 1) | 6.9% (2.7% to 11.6%)      |
| Trinidad and Tobago | Executions and police conflict                  | 0 (0 to 0) | 0 (0 to 0) | NA                        |
| Trinidad and Tobago | Exposure to forces of nature                    | 0 (0 to 0) | 0 (0 to 0) | NA                        |
| Trinidad and Tobago | Falls                                           | 1 (1 to 2) | 1 (1 to 2) | 4.4% (-1.1% to 9.9%)      |
| Trinidad and Tobago | Fire, heat, and hot substances                  | 0 (0 to 0) | 0 (0 to 0) | -7.6% (-13.3% to -1.7%)   |
| Trinidad and Tobago | Foreign body in eyes                            | 0 (0 to 0) | 0 (0 to 0) | 0% (0% to 0%)             |
| Trinidad and Tobago | Foreign body in other body part                 | 0 (0 to 0) | 0 (0 to 0) | 1.4% (-3% to 5.9%)        |
| Trinidad and Tobago | Motor vehicle road injuries                     | 0 (0 to 1) | 1 (0 to 1) | 13% (0.3% to 27.8%)       |
| Trinidad and Tobago | Motorcyclist road injuries                      | 0 (0 to 0) | 0 (0 to 0) | 42.5% (22.7% to 66.4%)    |
| Trinidad and Tobago | Non-venomous animal contact                     | 0 (0 to 0) | 0 (0 to 0) | -18.1% (-22.6% to -13.2%) |
| Trinidad and Tobago | Other exposure to mechanical forces             | 0 (0 to 0) | 0 (0 to 0) | 8.4% (-0.3% to 15.9%)     |
| Trinidad and Tobago | Other road injuries                             | 0 (0 to 0) | 0 (0 to 0) | -8.4% (-20.1% to 4.7%)    |
| Trinidad and Tobago | Other transport injuries                        | 0 (0 to 0) | 0 (0 to 0) | 0.2% (-4.4% to 5.2%)      |
| Trinidad and Tobago | Other unintentional injuries                    | 0 (0 to 0) | 0 (0 to 0) | -2.8% (-8.4% to 2.9%)     |
| Trinidad and Tobago | Pedestrian road injuries                        | 0 (0 to 0) | 0 (0 to 0) | -38.8% (-47% to -30.3%)   |
| Trinidad and Tobago | Physical violence by firearm                    | 0 (0 to 0) | 0 (0 to 0) | 268.8% (191.5% to 393.1%) |
| Trinidad and Tobago | Physical violence by other means                | 0 (0 to 0) | 0 (0 to 0) | 36.7% (20.5% to 55.1%)    |
| Trinidad and Tobago | Physical violence by sharp object               | 0 (0 to 0) | 0 (0 to 0) | 42.9% (19.9% to 70%)      |
| Trinidad and Tobago | Poisoning by carbon monoxide                    | 0 (0 to 0) | 0 (0 to 0) | 11% (-3.7% to 27.1%)      |
| Trinidad and Tobago | Poisoning by other means                        | 0 (0 to 0) | 0 (0 to 0) | -0.8% (-9.4% to 9.1%)     |
| Trinidad and Tobago | Pulmonary aspiration and foreign body in airway | 0 (0 to 0) | 0 (0 to 0) | -19.6% (-27.5% to -10.2%) |
| Trinidad and Tobago | Self-harm by firearm                            | 0 (0 to 0) | 0 (0 to 0) | 0.5% (-13.1% to 17.8%)    |
| Trinidad and Tobago | Self-harm by other specified means              | 0 (0 to 0) | 0 (0 to 0) | -31.3% (-38% to -24.3%)   |
| Trinidad and Tobago | Unintentional firearm injuries                  | 0 (0 to 0) | 0 (0 to 0) | 16.2% (8.2% to 25.6%)     |
| Trinidad and Tobago | Venomous animal contact                         | 0 (0 to 0) | 0 (0 to 0) | -15% (-19.9% to -9.8%)    |
| Tunisia             | Adverse effects of medical treatment            | 0 (0 to 0) | 0 (0 to 0) | 0% (0% to 0%)             |
| Tunisia             | Conflict and terrorism                          | 0 (0 to 0) | 0 (0 to 0) | NA                        |
| Tunisia             | Cyclist road injuries                           | 0 (0 to 0) | 0 (0 to 0) | 0.6% (-8.1% to 9.8%)      |
| Tunisia             | Drowning                                        | 0 (0 to 0) | 0 (0 to 0) | 74% (46.9% to 103.2%)     |
| Tunisia             | Environmental heat and cold exposure            | 0 (0 to 0) | 0 (0 to 0) | 2.9% (-1.6% to 7.8%)      |
| Tunisia             | Executions and police conflict                  | 0 (0 to 0) | 0 (0 to 0) | NA                        |

|         |                                                 |            |            |                           |
|---------|-------------------------------------------------|------------|------------|---------------------------|
| Tunisia | Exposure to forces of nature                    | 0 (0 to 0) | 0 (0 to 0) | NA                        |
| Tunisia | Falls                                           | 1 (1 to 2) | 2 (1 to 3) | 42.2% (36.8% to 47.7%)    |
| Tunisia | Fire, heat, and hot substances                  | 0 (0 to 0) | 0 (0 to 0) | -14.8% (-22% to -7.9%)    |
| Tunisia | Foreign body in eyes                            | 0 (0 to 0) | 0 (0 to 0) | 0% (0% to 0%)             |
| Tunisia | Foreign body in other body part                 | 0 (0 to 0) | 0 (0 to 0) | -0.8% (-4.4% to 2.6%)     |
| Tunisia | Motor vehicle road injuries                     | 1 (0 to 1) | 1 (0 to 1) | -2.1% (-9.3% to 5.5%)     |
| Tunisia | Motorcyclist road injuries                      | 0 (0 to 0) | 0 (0 to 0) | -7% (-16.2% to 1.9%)      |
| Tunisia | Non-venomous animal contact                     | 0 (0 to 0) | 0 (0 to 0) | -7.3% (-11.5% to -3.3%)   |
| Tunisia | Other exposure to mechanical forces             | 0 (0 to 1) | 0 (0 to 1) | -17.6% (-22.7% to -12.2%) |
| Tunisia | Other road injuries                             | 0 (0 to 0) | 0 (0 to 0) | 5.5% (-5.2% to 17.3%)     |
| Tunisia | Other transport injuries                        | 0 (0 to 0) | 0 (0 to 0) | -0.6% (-5.6% to 4%)       |
| Tunisia | Other unintentional injuries                    | 0 (0 to 0) | 0 (0 to 0) | -4.2% (-9% to 1.7%)       |
| Tunisia | Pedestrian road injuries                        | 0 (0 to 1) | 0 (0 to 0) | -22.1% (-29.5% to -15%)   |
| Tunisia | Physical violence by firearm                    | 0 (0 to 0) | 0 (0 to 0) | 104.2% (77.7% to 137.6%)  |
| Tunisia | Physical violence by other means                | 0 (0 to 0) | 0 (0 to 0) | -4.7% (-13.3% to 2.6%)    |
| Tunisia | Physical violence by sharp object               | 0 (0 to 0) | 0 (0 to 0) | -7.5% (-17.8% to 1.2%)    |
| Tunisia | Poisoning by carbon monoxide                    | 0 (0 to 0) | 0 (0 to 0) | 33.7% (17.9% to 51.2%)    |
| Tunisia | Poisoning by other means                        | 0 (0 to 0) | 0 (0 to 0) | -15.2% (-23.7% to -6.4%)  |
| Tunisia | Pulmonary aspiration and foreign body in airway | 0 (0 to 0) | 0 (0 to 0) | -12.3% (-19.5% to -4.6%)  |
| Tunisia | Self-harm by firearm                            | 0 (0 to 0) | 0 (0 to 0) | 34% (22.4% to 48.6%)      |
| Tunisia | Self-harm by other specified means              | 0 (0 to 0) | 0 (0 to 0) | 10.6% (4.4% to 17.5%)     |
| Tunisia | Unintentional firearm injuries                  | 0 (0 to 0) | 0 (0 to 0) | -6% (-14.8% to 5.3%)      |
| Tunisia | Venomous animal contact                         | 0 (0 to 0) | 0 (0 to 0) | -5.7% (-11.9% to 0.5%)    |
| Turkey  | Adverse effects of medical treatment            | 0 (0 to 0) | 0 (0 to 0) | 0% (0% to 0%)             |
| Turkey  | Conflict and terrorism                          | 1 (0 to 2) | 0 (0 to 1) | NA                        |
| Turkey  | Cyclist road injuries                           | 0 (0 to 0) | 0 (0 to 0) | -8.5% (-16.7% to 0.1%)    |
| Turkey  | Drowning                                        | 0 (0 to 0) | 0 (0 to 0) | 156.9% (121.1% to 194.6%) |
| Turkey  | Environmental heat and cold exposure            | 0 (0 to 0) | 0 (0 to 0) | 3.5% (-1.9% to 9.8%)      |
| Turkey  | Executions and police conflict                  | 0 (0 to 0) | 0 (0 to 0) | NA                        |
| Turkey  | Exposure to forces of nature                    | 0 (0 to 0) | 0 (0 to 0) | NA                        |
| Turkey  | Falls                                           | 1 (1 to 2) | 3 (2 to 4) | 110.5% (97.3% to 125.4%)  |
| Turkey  | Fire, heat, and hot substances                  | 0 (0 to 0) | 0 (0 to 0) | -0.6% (-5.4% to 4.6%)     |
| Turkey  | Foreign body in eyes                            | 0 (0 to 0) | 0 (0 to 0) | 0% (0% to 0%)             |
| Turkey  | Foreign body in other body part                 | 0 (0 to 0) | 0 (0 to 0) | -7.9% (-12.6% to -3.9%)   |
| Turkey  | Motor vehicle road injuries                     | 0 (0 to 1) | 0 (0 to 1) | -15.3% (-22.1% to -7.3%)  |
| Turkey  | Motorcyclist road injuries                      | 0 (0 to 0) | 0 (0 to 0) | 10.8% (0% to 23.1%)       |
| Turkey  | Non-venomous animal contact                     | 0 (0 to 0) | 0 (0 to 0) | -17.1% (-21.7% to -12.8%) |
| Turkey  | Other exposure to mechanical forces             | 0 (0 to 0) | 0 (0 to 0) | -4.4% (-10.7% to 2.6%)    |
| Turkey  | Other road injuries                             | 0 (0 to 0) | 0 (0 to 0) | -63.3% (-69.9% to -56.6%) |
| Turkey  | Other transport injuries                        | 0 (0 to 0) | 0 (0 to 0) | -13.3% (-17.6% to -8.5%)  |
| Turkey  | Other unintentional injuries                    | 0 (0 to 0) | 0 (0 to 0) | -23.9% (-29.8% to -17.3%) |
| Turkey  | Pedestrian road injuries                        | 0 (0 to 0) | 0 (0 to 0) | -9.9% (-18.3% to -0.7%)   |
| Turkey  | Physical violence by firearm                    | 0 (0 to 0) | 0 (0 to 0) | 45.7% (22.7% to 75.1%)    |

|              |                                                 |            |            |                           |
|--------------|-------------------------------------------------|------------|------------|---------------------------|
| Turkey       | Physical violence by other means                | 0 (0 to 0) | 0 (0 to 0) | -36.4% (-43.7% to -28.8%) |
| Turkey       | Physical violence by sharp object               | 0 (0 to 0) | 0 (0 to 0) | -32.3% (-40.8% to -23.5%) |
| Turkey       | Poisoning by carbon monoxide                    | 0 (0 to 0) | 0 (0 to 0) | 46.8% (28.7% to 70.1%)    |
| Turkey       | Poisoning by other means                        | 0 (0 to 0) | 0 (0 to 0) | -16.9% (-23.9% to -9.7%)  |
| Turkey       | Pulmonary aspiration and foreign body in airway | 0 (0 to 0) | 0 (0 to 0) | -20.1% (-26.2% to -13.4%) |
| Turkey       | Self-harm by firearm                            | 0 (0 to 0) | 0 (0 to 0) | -6.8% (-17.8% to 4%)      |
| Turkey       | Self-harm by other specified means              | 0 (0 to 0) | 0 (0 to 0) | -2.1% (-9.4% to 5.2%)     |
| Turkey       | Unintentional firearm injuries                  | 0 (0 to 0) | 0 (0 to 0) | -13.2% (-21.8% to -5.7%)  |
| Turkey       | Venomous animal contact                         | 0 (0 to 0) | 0 (0 to 0) | -8.9% (-15.6% to -0.3%)   |
| Turkmenistan | Adverse effects of medical treatment            | 0 (0 to 0) | 0 (0 to 0) | 0% (0% to 0%)             |
| Turkmenistan | Conflict and terrorism                          | 0 (0 to 0) | 0 (0 to 0) | NA                        |
| Turkmenistan | Cyclist road injuries                           | 0 (0 to 0) | 0 (0 to 0) | -15.9% (-24.9% to -5.9%)  |
| Turkmenistan | Drowning                                        | 0 (0 to 0) | 0 (0 to 0) | 10.5% (-3.7% to 23.4%)    |
| Turkmenistan | Environmental heat and cold exposure            | 0 (0 to 0) | 0 (0 to 0) | 38% (20.6% to 58.3%)      |
| Turkmenistan | Executions and police conflict                  | 0 (0 to 0) | 0 (0 to 0) | NA                        |
| Turkmenistan | Exposure to forces of nature                    | 0 (0 to 0) | 0 (0 to 0) | NA                        |
| Turkmenistan | Falls                                           | 2 (2 to 3) | 2 (2 to 3) | 6.9% (1.3% to 12.1%)      |
| Turkmenistan | Fire, heat, and hot substances                  | 0 (0 to 0) | 0 (0 to 0) | -39.7% (-46% to -34.1%)   |
| Turkmenistan | Foreign body in eyes                            | 0 (0 to 0) | 0 (0 to 0) | 0% (0% to 0%)             |
| Turkmenistan | Foreign body in other body part                 | 0 (0 to 0) | 0 (0 to 0) | -4.4% (-8.5% to 0.2%)     |
| Turkmenistan | Motor vehicle road injuries                     | 1 (0 to 1) | 1 (0 to 1) | -32% (-39.6% to -23.1%)   |
| Turkmenistan | Motorcyclist road injuries                      | 0 (0 to 0) | 0 (0 to 0) | -14.7% (-28.8% to 0.5%)   |
| Turkmenistan | Non-venomous animal contact                     | 0 (0 to 0) | 0 (0 to 0) | -12.1% (-16.3% to -7.3%)  |
| Turkmenistan | Other exposure to mechanical forces             | 1 (0 to 1) | 1 (0 to 1) | 33.6% (24.6% to 45.1%)    |
| Turkmenistan | Other road injuries                             | 0 (0 to 0) | 0 (0 to 0) | -17.1% (-27.3% to -5.2%)  |
| Turkmenistan | Other transport injuries                        | 0 (0 to 0) | 0 (0 to 0) | 8.3% (3.3% to 13.4%)      |
| Turkmenistan | Other unintentional injuries                    | 0 (0 to 0) | 0 (0 to 0) | 3% (-2.1% to 8.4%)        |
| Turkmenistan | Pedestrian road injuries                        | 0 (0 to 1) | 0 (0 to 0) | -50.7% (-57.1% to -43.2%) |
| Turkmenistan | Physical violence by firearm                    | 0 (0 to 0) | 0 (0 to 0) | 13.6% (-5.6% to 34%)      |
| Turkmenistan | Physical violence by other means                | 0 (0 to 0) | 0 (0 to 0) | -13.7% (-24% to -3%)      |
| Turkmenistan | Physical violence by sharp object               | 0 (0 to 0) | 0 (0 to 0) | -17.1% (-27.8% to -4.4%)  |
| Turkmenistan | Poisoning by carbon monoxide                    | 0 (0 to 0) | 0 (0 to 0) | 44.2% (29.9% to 63.5%)    |
| Turkmenistan | Poisoning by other means                        | 0 (0 to 0) | 0 (0 to 0) | 2.8% (-5.5% to 12.6%)     |
| Turkmenistan | Pulmonary aspiration and foreign body in airway | 0 (0 to 0) | 0 (0 to 0) | -13.1% (-19.8% to -5.7%)  |
| Turkmenistan | Self-harm by firearm                            | 0 (0 to 0) | 0 (0 to 0) | 18% (1.4% to 38.9%)       |
| Turkmenistan | Self-harm by other specified means              | 0 (0 to 0) | 0 (0 to 0) | 27.9% (20.7% to 35.8%)    |
| Turkmenistan | Unintentional firearm injuries                  | 0 (0 to 0) | 0 (0 to 0) | 20.2% (8.7% to 33.7%)     |
| Turkmenistan | Venomous animal contact                         | 0 (0 to 0) | 0 (0 to 0) | -12% (-17.2% to -6%)      |
| Tuvalu       | Adverse effects of medical treatment            | 0 (0 to 0) | 0 (0 to 0) | 0% (0% to 0%)             |
| Tuvalu       | Conflict and terrorism                          | 0 (0 to 0) | 0 (0 to 0) | NA                        |
| Tuvalu       | Cyclist road injuries                           | 0 (0 to 1) | 0 (0 to 1) | 7.6% (-0.7% to 16.6%)     |
| Tuvalu       | Drowning                                        | 0 (0 to 0) | 0 (0 to 0) | 21.4% (12.6% to 30.7%)    |
| Tuvalu       | Environmental heat and cold exposure            | 0 (0 to 0) | 0 (0 to 0) | -1.3% (-7.4% to 5.1%)     |

|        |                                                 |            |            |                           |
|--------|-------------------------------------------------|------------|------------|---------------------------|
| Tuvalu | Executions and police conflict                  | 0 (0 to 0) | 0 (0 to 0) | NA                        |
| Tuvalu | Exposure to forces of nature                    | 0 (0 to 0) | 0 (0 to 0) | NA                        |
| Tuvalu | Falls                                           | 3 (2 to 4) | 4 (3 to 6) | 54.1% (48.1% to 59.5%)    |
| Tuvalu | Fire, heat, and hot substances                  | 0 (0 to 0) | 0 (0 to 0) | 6.1% (-0.6% to 14.4%)     |
| Tuvalu | Foreign body in eyes                            | 0 (0 to 0) | 0 (0 to 0) | 0% (0% to 0%)             |
| Tuvalu | Foreign body in other body part                 | 0 (0 to 0) | 0 (0 to 0) | -0.7% (-4.5% to 3.5%)     |
| Tuvalu | Motor vehicle road injuries                     | 1 (0 to 2) | 1 (0 to 2) | -8.8% (-16.3% to -0.5%)   |
| Tuvalu | Motorcyclist road injuries                      | 1 (0 to 1) | 1 (0 to 1) | 10.2% (1.1% to 21.1%)     |
| Tuvalu | Non-venomous animal contact                     | 0 (0 to 0) | 0 (0 to 0) | -16.2% (-20.2% to -11.7%) |
| Tuvalu | Other exposure to mechanical forces             | 0 (0 to 0) | 0 (0 to 0) | -8% (-13.5% to -1.6%)     |
| Tuvalu | Other road injuries                             | 0 (0 to 0) | 0 (0 to 0) | 12.3% (1.9% to 24.5%)     |
| Tuvalu | Other transport injuries                        | 0 (0 to 1) | 0 (0 to 0) | -8.3% (-12.5% to -3.5%)   |
| Tuvalu | Other unintentional injuries                    | 0 (0 to 0) | 0 (0 to 0) | -5.3% (-10.2% to 0.1%)    |
| Tuvalu | Pedestrian road injuries                        | 1 (0 to 1) | 1 (0 to 1) | -10% (-17.3% to -2.4%)    |
| Tuvalu | Physical violence by firearm                    | 0 (0 to 0) | 0 (0 to 0) | 22.1% (5.6% to 41.8%)     |
| Tuvalu | Physical violence by other means                | 1 (0 to 1) | 1 (0 to 1) | 12% (4.5% to 20.1%)       |
| Tuvalu | Physical violence by sharp object               | 0 (0 to 0) | 0 (0 to 0) | -3.7% (-14% to 6.2%)      |
| Tuvalu | Poisoning by carbon monoxide                    | 0 (0 to 0) | 0 (0 to 0) | 20% (6.8% to 34%)         |
| Tuvalu | Poisoning by other means                        | 0 (0 to 0) | 0 (0 to 0) | -9.9% (-18.4% to -1.3%)   |
| Tuvalu | Pulmonary aspiration and foreign body in airway | 0 (0 to 0) | 0 (0 to 0) | -16.5% (-26% to -6.5%)    |
| Tuvalu | Self-harm by firearm                            | 0 (0 to 0) | 0 (0 to 0) | 11% (-3.9% to 28.3%)      |
| Tuvalu | Self-harm by other specified means              | 0 (0 to 0) | 0 (0 to 0) | -15.4% (-22.3% to -7.7%)  |
| Tuvalu | Unintentional firearm injuries                  | 0 (0 to 0) | 0 (0 to 0) | -20.7% (-29.2% to -13.8%) |
| Tuvalu | Venomous animal contact                         | 0 (0 to 0) | 0 (0 to 0) | -7.4% (-14.5% to 2.3%)    |
| Uganda | Adverse effects of medical treatment            | 0 (0 to 0) | 0 (0 to 0) | 0% (0% to 0%)             |
| Uganda | Conflict and terrorism                          | 2 (0 to 5) | 0 (0 to 0) | NA                        |
| Uganda | Cyclist road injuries                           | 2 (1 to 3) | 2 (1 to 3) | 7.4% (0.2% to 14.9%)      |
| Uganda | Drowning                                        | 0 (0 to 0) | 0 (0 to 0) | 3.3% (-3.9% to 12.5%)     |
| Uganda | Environmental heat and cold exposure            | 0 (0 to 0) | 0 (0 to 0) | -1.5% (-6.6% to 3.6%)     |
| Uganda | Executions and police conflict                  | 0 (0 to 0) | 0 (0 to 0) | NA                        |
| Uganda | Exposure to forces of nature                    | 0 (0 to 0) | 0 (0 to 0) | NA                        |
| Uganda | Falls                                           | 3 (2 to 4) | 4 (2 to 5) | 20% (16.1% to 23.7%)      |
| Uganda | Fire, heat, and hot substances                  | 0 (0 to 0) | 0 (0 to 0) | -5.9% (-10.2% to -1.7%)   |
| Uganda | Foreign body in eyes                            | 0 (0 to 0) | 0 (0 to 0) | 0% (0% to 0%)             |
| Uganda | Foreign body in other body part                 | 1 (0 to 1) | 1 (0 to 1) | -9.3% (-12.8% to -6%)     |
| Uganda | Motor vehicle road injuries                     | 1 (0 to 2) | 1 (1 to 2) | 6.3% (-2.1% to 15.9%)     |
| Uganda | Motorcyclist road injuries                      | 0 (0 to 1) | 1 (0 to 1) | 9.1% (0.5% to 17.8%)      |
| Uganda | Non-venomous animal contact                     | 0 (0 to 1) | 0 (0 to 1) | -18.3% (-22.2% to -14.8%) |
| Uganda | Other exposure to mechanical forces             | 0 (0 to 0) | 0 (0 to 0) | -6.6% (-11.7% to -0.4%)   |
| Uganda | Other road injuries                             | 0 (0 to 0) | 0 (0 to 0) | -13.8% (-21.3% to -5.7%)  |
| Uganda | Other transport injuries                        | 0 (0 to 1) | 0 (0 to 1) | -8.3% (-11.9% to -4.4%)   |
| Uganda | Other unintentional injuries                    | 0 (0 to 0) | 0 (0 to 0) | -7.1% (-12.7% to -1.1%)   |
| Uganda | Pedestrian road injuries                        | 2 (1 to 3) | 2 (1 to 3) | -5.4% (-12.1% to 1.1%)    |



|                      |                                                 |             |            |                           |
|----------------------|-------------------------------------------------|-------------|------------|---------------------------|
| Uganda               | Physical violence by firearm                    | 0 (0 to 0)  | 0 (0 to 0) | 33.9% (17.3% to 53%)      |
| Uganda               | Physical violence by other means                | 0 (0 to 0)  | 0 (0 to 0) | 5.9% (-0.2% to 12.5%)     |
| Uganda               | Physical violence by sharp object               | 0 (0 to 0)  | 0 (0 to 0) | 5.4% (-2.2% to 13.8%)     |
| Uganda               | Poisoning by carbon monoxide                    | 0 (0 to 0)  | 0 (0 to 0) | 16.4% (3.3% to 30.1%)     |
| Uganda               | Poisoning by other means                        | 0 (0 to 0)  | 0 (0 to 0) | -12.3% (-19.1% to -4.4%)  |
| Uganda               | Pulmonary aspiration and foreign body in airway | 0 (0 to 0)  | 0 (0 to 0) | -15.6% (-25.8% to -3.8%)  |
| Uganda               | Self-harm by firearm                            | 0 (0 to 0)  | 0 (0 to 0) | 19.6% (5.8% to 37.3%)     |
| Uganda               | Self-harm by other specified means              | 0 (0 to 0)  | 0 (0 to 0) | 5.9% (1.2% to 11.2%)      |
| Uganda               | Unintentional firearm injuries                  | 0 (0 to 0)  | 0 (0 to 0) | -17.7% (-25.7% to -10.4%) |
| Uganda               | Venomous animal contact                         | 0 (0 to 0)  | 0 (0 to 0) | -22.9% (-31% to -15%)     |
| Ukraine              | Adverse effects of medical treatment            | 0 (0 to 0)  | 0 (0 to 0) | 0% (0% to 0%)             |
| Ukraine              | Conflict and terrorism                          | 0 (0 to 0)  | 0 (0 to 1) | NA                        |
| Ukraine              | Cyclist road injuries                           | 1 (0 to 1)  | 0 (0 to 1) | -13.7% (-19.3% to -6.9%)  |
| Ukraine              | Drowning                                        | 0 (0 to 0)  | 0 (0 to 0) | -48.6% (-53.1% to -43.1%) |
| Ukraine              | Environmental heat and cold exposure            | 0 (0 to 1)  | 0 (0 to 0) | -7% (-15.6% to 2.5%)      |
| Ukraine              | Executions and police conflict                  | 0 (0 to 0)  | 0 (0 to 0) | NA                        |
| Ukraine              | Exposure to forces of nature                    | 0 (0 to 0)  | 0 (0 to 0) | NA                        |
| Ukraine              | Falls                                           | 7 (5 to 10) | 6 (4 to 8) | -21.3% (-24.1% to -18.2%) |
| Ukraine              | Fire, heat, and hot substances                  | 0 (0 to 0)  | 0 (0 to 0) | -22.9% (-26.1% to -19.5%) |
| Ukraine              | Foreign body in eyes                            | 0 (0 to 0)  | 0 (0 to 0) | 0% (0% to 0%)             |
| Ukraine              | Foreign body in other body part                 | 0 (0 to 0)  | 0 (0 to 0) | -2.2% (-6.3% to 1.7%)     |
| Ukraine              | Motor vehicle road injuries                     | 2 (1 to 4)  | 2 (1 to 3) | -12.2% (-17% to -6.3%)    |
| Ukraine              | Motorcyclist road injuries                      | 0 (0 to 1)  | 0 (0 to 0) | -21% (-27.3% to -13.6%)   |
| Ukraine              | Non-venomous animal contact                     | 0 (0 to 0)  | 0 (0 to 0) | 5.6% (1.7% to 9.5%)       |
| Ukraine              | Other exposure to mechanical forces             | 1 (0 to 2)  | 1 (0 to 2) | -3.1% (-7.4% to 1.5%)     |
| Ukraine              | Other road injuries                             | 0 (0 to 0)  | 0 (0 to 0) | -7.3% (-14.4% to 1%)      |
| Ukraine              | Other transport injuries                        | 0 (0 to 0)  | 0 (0 to 0) | 14.1% (6.3% to 24.5%)     |
| Ukraine              | Other unintentional injuries                    | 0 (0 to 0)  | 0 (0 to 0) | -2% (-6.2% to 2.4%)       |
| Ukraine              | Pedestrian road injuries                        | 1 (0 to 1)  | 1 (0 to 1) | -34.1% (-39.1% to -28.8%) |
| Ukraine              | Physical violence by firearm                    | 0 (0 to 0)  | 0 (0 to 0) | 11.7% (1.6% to 22.9%)     |
| Ukraine              | Physical violence by other means                | 1 (0 to 1)  | 0 (0 to 1) | -9.2% (-13.7% to -4%)     |
| Ukraine              | Physical violence by sharp object               | 0 (0 to 0)  | 0 (0 to 0) | -19.2% (-25.1% to -12.9%) |
| Ukraine              | Poisoning by carbon monoxide                    | 0 (0 to 0)  | 0 (0 to 0) | -39% (-45.8% to -31.4%)   |
| Ukraine              | Poisoning by other means                        | 0 (0 to 0)  | 0 (0 to 0) | -6.7% (-13.1% to -0.3%)   |
| Ukraine              | Pulmonary aspiration and foreign body in airway | 0 (0 to 0)  | 0 (0 to 0) | -5.2% (-11.7% to 1.9%)    |
| Ukraine              | Self-harm by firearm                            | 0 (0 to 0)  | 0 (0 to 0) | -5.2% (-17.8% to 8.8%)    |
| Ukraine              | Self-harm by other specified means              | 0 (0 to 1)  | 1 (0 to 1) | 39.6% (27.9% to 53.6%)    |
| Ukraine              | Unintentional firearm injuries                  | 0 (0 to 0)  | 0 (0 to 0) | -5.8% (-12.1% to 0.7%)    |
| Ukraine              | Venomous animal contact                         | 0 (0 to 0)  | 0 (0 to 0) | 6.1% (0.5% to 11.6%)      |
| United Arab Emirates | Adverse effects of medical treatment            | 0 (0 to 0)  | 0 (0 to 0) | 0% (0% to 0%)             |
| United Arab Emirates | Conflict and terrorism                          | 0 (0 to 0)  | 0 (0 to 0) | NA                        |
| United Arab Emirates | Cyclist road injuries                           | 0 (0 to 0)  | 0 (0 to 0) | -6.6% (-14.9% to 2.7%)    |
| United Arab Emirates | Drowning                                        | 0 (0 to 0)  | 0 (0 to 0) | 47.3% (23.5% to 76.3%)    |

|                      |                                                 |            |             |                           |
|----------------------|-------------------------------------------------|------------|-------------|---------------------------|
| United Arab Emirates | Environmental heat and cold exposure            | 0 (0 to 0) | 0 (0 to 0)  | 1.5% (-3.1% to 6.4%)      |
| United Arab Emirates | Executions and police conflict                  | 0 (0 to 0) | 0 (0 to 0)  | NA                        |
| United Arab Emirates | Exposure to forces of nature                    | 0 (0 to 0) | 0 (0 to 0)  | NA                        |
| United Arab Emirates | Falls                                           | 2 (2 to 3) | 2 (2 to 3)  | 13.9% (9.7% to 18.3%)     |
| United Arab Emirates | Fire, heat, and hot substances                  | 0 (0 to 0) | 0 (0 to 0)  | -17.6% (-23.1% to -11.1%) |
| United Arab Emirates | Foreign body in eyes                            | 0 (0 to 0) | 0 (0 to 0)  | 0% (0% to 0%)             |
| United Arab Emirates | Foreign body in other body part                 | 0 (0 to 0) | 0 (0 to 0)  | -0.2% (-4.8% to 4.4%)     |
| United Arab Emirates | Motor vehicle road injuries                     | 1 (1 to 2) | 1 (1 to 2)  | -16.4% (-22.3% to -10.1%) |
| United Arab Emirates | Motorcyclist road injuries                      | 0 (0 to 0) | 0 (0 to 0)  | -11.4% (-20.6% to -0.6%)  |
| United Arab Emirates | Non-venomous animal contact                     | 0 (0 to 0) | 0 (0 to 0)  | 7% (1.4% to 12%)          |
| United Arab Emirates | Other exposure to mechanical forces             | 0 (0 to 1) | 0 (0 to 1)  | -15.2% (-21% to -9.9%)    |
| United Arab Emirates | Other road injuries                             | 0 (0 to 0) | 0 (0 to 0)  | 6.5% (-5.1% to 20.6%)     |
| United Arab Emirates | Other transport injuries                        | 0 (0 to 0) | 0 (0 to 0)  | 8.2% (3.2% to 13.6%)      |
| United Arab Emirates | Other unintentional injuries                    | 0 (0 to 0) | 0 (0 to 0)  | -11% (-16.7% to -5.1%)    |
| United Arab Emirates | Pedestrian road injuries                        | 1 (0 to 1) | 0 (0 to 1)  | -34.8% (-41.6% to -27.7%) |
| United Arab Emirates | Physical violence by firearm                    | 0 (0 to 0) | 0 (0 to 0)  | 72.7% (49.3% to 101.8%)   |
| United Arab Emirates | Physical violence by other means                | 0 (0 to 0) | 0 (0 to 0)  | -15.8% (-23.4% to -8.7%)  |
| United Arab Emirates | Physical violence by sharp object               | 0 (0 to 0) | 0 (0 to 0)  | -14.1% (-24.1% to -4.7%)  |
| United Arab Emirates | Poisoning by carbon monoxide                    | 0 (0 to 0) | 0 (0 to 0)  | 34.5% (22% to 50.9%)      |
| United Arab Emirates | Poisoning by other means                        | 0 (0 to 0) | 0 (0 to 0)  | -10.2% (-16.8% to -3%)    |
| United Arab Emirates | Pulmonary aspiration and foreign body in airway | 0 (0 to 0) | 0 (0 to 0)  | -1.5% (-10.1% to 7.8%)    |
| United Arab Emirates | Self-harm by firearm                            | 0 (0 to 0) | 0 (0 to 0)  | -0.5% (-10.6% to 11.6%)   |
| United Arab Emirates | Self-harm by other specified means              | 0 (0 to 0) | 0 (0 to 0)  | 2.5% (-3.3% to 9.2%)      |
| United Arab Emirates | Unintentional firearm injuries                  | 0 (0 to 0) | 0 (0 to 0)  | -6.9% (-14.1% to 1.5%)    |
| United Arab Emirates | Venomous animal contact                         | 0 (0 to 0) | 0 (0 to 0)  | 5.1% (-2.9% to 13%)       |
| United Kingdom       | Adverse effects of medical treatment            | 0 (0 to 0) | 0 (0 to 0)  | 0% (0% to 0%)             |
| United Kingdom       | Conflict and terrorism                          | 0 (0 to 0) | 0 (0 to 0)  | NA                        |
| United Kingdom       | Cyclist road injuries                           | 0 (0 to 0) | 0 (0 to 0)  | -25.1% (-29.3% to -21%)   |
| United Kingdom       | Drowning                                        | 0 (0 to 0) | 0 (0 to 0)  | 1.3% (-2% to 4.7%)        |
| United Kingdom       | Environmental heat and cold exposure            | 0 (0 to 0) | 0 (0 to 0)  | -26.9% (-32% to -22.3%)   |
| United Kingdom       | Executions and police conflict                  | 0 (0 to 0) | 0 (0 to 0)  | NA                        |
| United Kingdom       | Exposure to forces of nature                    | 0 (0 to 0) | 0 (0 to 0)  | NA                        |
| United Kingdom       | Falls                                           | 6 (4 to 8) | 7 (5 to 10) | 23.2% (20.7% to 25.7%)    |
| United Kingdom       | Fire, heat, and hot substances                  | 0 (0 to 0) | 0 (0 to 0)  | -25.4% (-29.5% to -21.8%) |
| United Kingdom       | Foreign body in eyes                            | 0 (0 to 0) | 0 (0 to 0)  | 0% (0% to 0%)             |
| United Kingdom       | Foreign body in other body part                 | 0 (0 to 0) | 0 (0 to 0)  | -0.1% (-1% to 0.7%)       |
| United Kingdom       | Motor vehicle road injuries                     | 0 (0 to 1) | 0 (0 to 0)  | -39.5% (-42.9% to -36.4%) |
| United Kingdom       | Motorcyclist road injuries                      | 0 (0 to 0) | 0 (0 to 0)  | -36.5% (-40.9% to -32.6%) |
| United Kingdom       | Non-venomous animal contact                     | 0 (0 to 0) | 0 (0 to 0)  | -8.8% (-9.7% to -7.8%)    |
| United Kingdom       | Other exposure to mechanical forces             | 0 (0 to 1) | 0 (0 to 1)  | -5.2% (-9.9% to -2%)      |
| United Kingdom       | Other road injuries                             | 0 (0 to 0) | 0 (0 to 0)  | -17.3% (-21.9% to -12.9%) |
| United Kingdom       | Other transport injuries                        | 0 (0 to 0) | 0 (0 to 0)  | -4.9% (-7% to -3%)        |
| United Kingdom       | Other unintentional injuries                    | 0 (0 to 1) | 0 (0 to 1)  | -25.5% (-29.9% to -21.2%) |

|                             |                                                 |            |            |                           |
|-----------------------------|-------------------------------------------------|------------|------------|---------------------------|
| United Kingdom              | Pedestrian road injuries                        | 0 (0 to 0) | 0 (0 to 0) | -49.9% (-55.1% to -45.1%) |
| United Kingdom              | Physical violence by firearm                    | 0 (0 to 0) | 0 (0 to 0) | 34.5% (24.3% to 46.4%)    |
| United Kingdom              | Physical violence by other means                | 0 (0 to 0) | 0 (0 to 0) | -22.7% (-29.3% to -17.4%) |
| United Kingdom              | Physical violence by sharp object               | 0 (0 to 0) | 0 (0 to 0) | -11.4% (-19.6% to -3.9%)  |
| United Kingdom              | Poisoning by carbon monoxide                    | 0 (0 to 0) | 0 (0 to 0) | 8.8% (3.3% to 13.9%)      |
| United Kingdom              | Poisoning by other means                        | 0 (0 to 0) | 0 (0 to 0) | -24.6% (-28.8% to -21.1%) |
| United Kingdom              | Pulmonary aspiration and foreign body in airway | 0 (0 to 0) | 0 (0 to 0) | -14.7% (-17.3% to -11.8%) |
| United Kingdom              | Self-harm by firearm                            | 0 (0 to 0) | 0 (0 to 0) | 3.8% (-1.1% to 9.1%)      |
| United Kingdom              | Self-harm by other specified means              | 0 (0 to 1) | 0 (0 to 0) | -23.9% (-27% to -20.9%)   |
| United Kingdom              | Unintentional firearm injuries                  | 0 (0 to 0) | 0 (0 to 0) | 2.5% (-1.4% to 6%)        |
| United Kingdom              | Venomous animal contact                         | 0 (0 to 0) | 0 (0 to 0) | -10.8% (-11.8% to -9.6%)  |
| United Republic of Tanzania | Adverse effects of medical treatment            | 0 (0 to 0) | 0 (0 to 0) | 0% (0% to 0%)             |
| United Republic of Tanzania | Conflict and terrorism                          | 0 (0 to 0) | 0 (0 to 0) | NA                        |
| United Republic of Tanzania | Cyclist road injuries                           | 2 (1 to 3) | 1 (1 to 3) | -2.8% (-9.1% to 4%)       |
| United Republic of Tanzania | Drowning                                        | 0 (0 to 0) | 0 (0 to 0) | 3.6% (-4.7% to 11.9%)     |
| United Republic of Tanzania | Environmental heat and cold exposure            | 0 (0 to 0) | 0 (0 to 0) | -1.9% (-6.8% to 2.8%)     |
| United Republic of Tanzania | Executions and police conflict                  | 0 (0 to 0) | 0 (0 to 0) | NA                        |
| United Republic of Tanzania | Exposure to forces of nature                    | 0 (0 to 0) | 0 (0 to 0) | NA                        |
| United Republic of Tanzania | Falls                                           | 3 (2 to 5) | 4 (3 to 6) | 19.3% (15.3% to 23.5%)    |
| United Republic of Tanzania | Fire, heat, and hot substances                  | 0 (0 to 0) | 0 (0 to 0) | -5.5% (-9.8% to -1.6%)    |
| United Republic of Tanzania | Foreign body in eyes                            | 0 (0 to 0) | 0 (0 to 0) | 0% (0% to 0%)             |
| United Republic of Tanzania | Foreign body in other body part                 | 1 (0 to 1) | 1 (0 to 1) | -4.5% (-7.8% to -1.2%)    |
| United Republic of Tanzania | Motor vehicle road injuries                     | 1 (0 to 2) | 1 (0 to 2) | -1% (-9.9% to 6.9%)       |
| United Republic of Tanzania | Motorcyclist road injuries                      | 1 (0 to 1) | 0 (0 to 1) | -12.5% (-19.2% to -5.4%)  |
| United Republic of Tanzania | Non-venomous animal contact                     | 0 (0 to 1) | 0 (0 to 1) | -16.9% (-20.7% to -13.1%) |
| United Republic of Tanzania | Other exposure to mechanical forces             | 0 (0 to 0) | 0 (0 to 0) | -4.7% (-9.9% to -0.1%)    |
| United Republic of Tanzania | Other road injuries                             | 0 (0 to 0) | 0 (0 to 0) | -2.1% (-10.6% to 6.7%)    |
| United Republic of Tanzania | Other transport injuries                        | 0 (0 to 1) | 0 (0 to 0) | -3% (-7% to 1.1%)         |
| United Republic of Tanzania | Other unintentional injuries                    | 0 (0 to 0) | 0 (0 to 0) | -10% (-15.5% to -4.5%)    |
| United Republic of Tanzania | Pedestrian road injuries                        | 2 (1 to 3) | 2 (1 to 3) | -7.5% (-13.6% to -1.3%)   |
| United Republic of Tanzania | Physical violence by firearm                    | 0 (0 to 0) | 0 (0 to 0) | 31.2% (16.8% to 49.1%)    |
| United Republic of Tanzania | Physical violence by other means                | 0 (0 to 0) | 0 (0 to 0) | 0.7% (-5.1% to 6.3%)      |
| United Republic of Tanzania | Physical violence by sharp object               | 0 (0 to 0) | 0 (0 to 0) | 0% (-7.8% to 7.8%)        |
| United Republic of Tanzania | Poisoning by carbon monoxide                    | 0 (0 to 0) | 0 (0 to 0) | 16.5% (4.3% to 29.1%)     |
| United Republic of Tanzania | Poisoning by other means                        | 0 (0 to 0) | 0 (0 to 0) | -12.5% (-19.3% to -5.2%)  |
| United Republic of Tanzania | Pulmonary aspiration and foreign body in airway | 0 (0 to 0) | 0 (0 to 0) | -15.4% (-25% to -5.2%)    |
| United Republic of Tanzania | Self-harm by firearm                            | 0 (0 to 0) | 0 (0 to 0) | 10.3% (0% to 25%)         |
| United Republic of Tanzania | Self-harm by other specified means              | 0 (0 to 0) | 0 (0 to 0) | -6.6% (-11.2% to -2.1%)   |
| United Republic of Tanzania | Unintentional firearm injuries                  | 0 (0 to 0) | 0 (0 to 0) | -10.1% (-17.4% to -2.7%)  |
| United Republic of Tanzania | Venomous animal contact                         | 0 (0 to 0) | 0 (0 to 0) | -16% (-22.9% to -9.1%)    |
| United States of America    | Adverse effects of medical treatment            | 0 (0 to 0) | 0 (0 to 0) | 0% (0% to 0%)             |
| United States of America    | Conflict and terrorism                          | 0 (0 to 0) | 0 (0 to 0) | NA                        |
| United States of America    | Cyclist road injuries                           | 0 (0 to 1) | 0 (0 to 1) | -3.3% (-14.1% to 7.3%)    |

|                              |                                                 |              |               |                           |
|------------------------------|-------------------------------------------------|--------------|---------------|---------------------------|
| United States of America     | Drowning                                        | 0 (0 to 0)   | 0 (0 to 0)    | -2.9% (-5.8% to -0.6%)    |
| United States of America     | Environmental heat and cold exposure            | 0 (0 to 0)   | 0 (0 to 0)    | -6.7% (-10.2% to -3.3%)   |
| United States of America     | Executions and police conflict                  | 0 (0 to 0)   | 0 (0 to 0)    | NA                        |
| United States of America     | Exposure to forces of nature                    | 0 (0 to 0)   | 0 (0 to 0)    | NA                        |
| United States of America     | Falls                                           | 12 (8 to 19) | 15 (10 to 23) | 19.3% (12.9% to 25%)      |
| United States of America     | Fire, heat, and hot substances                  | 0 (0 to 0)   | 0 (0 to 0)    | -26.6% (-29.9% to -24%)   |
| United States of America     | Foreign body in eyes                            | 0 (0 to 0)   | 0 (0 to 0)    | 0% (0% to 0%)             |
| United States of America     | Foreign body in other body part                 | 1 (0 to 1)   | 1 (0 to 1)    | 25.5% (20.7% to 30.7%)    |
| United States of America     | Motor vehicle road injuries                     | 3 (1 to 5)   | 2 (1 to 4)    | -17.7% (-22% to -13.8%)   |
| United States of America     | Motorcyclist road injuries                      | 0 (0 to 1)   | 1 (0 to 1)    | 14.2% (3.7% to 25.8%)     |
| United States of America     | Non-venomous animal contact                     | 0 (0 to 1)   | 0 (0 to 1)    | 13.8% (11% to 17.2%)      |
| United States of America     | Other exposure to mechanical forces             | 1 (0 to 2)   | 1 (0 to 1)    | -28.5% (-31.6% to -25.9%) |
| United States of America     | Other road injuries                             | 0 (0 to 0)   | 0 (0 to 0)    | -5.9% (-11.1% to -0.8%)   |
| United States of America     | Other transport injuries                        | 2 (1 to 3)   | 1 (1 to 2)    | -29.5% (-32.4% to -26.4%) |
| United States of America     | Other unintentional injuries                    | 1 (1 to 2)   | 1 (1 to 2)    | 15.2% (9.5% to 19.6%)     |
| United States of America     | Pedestrian road injuries                        | 0 (0 to 1)   | 0 (0 to 1)    | -19.9% (-26.8% to -13.5%) |
| United States of America     | Physical violence by firearm                    | 0 (0 to 0)   | 0 (0 to 0)    | 1.3% (-6.3% to 10.7%)     |
| United States of America     | Physical violence by other means                | 1 (0 to 1)   | 0 (0 to 1)    | -16.8% (-20.5% to -12.9%) |
| United States of America     | Physical violence by sharp object               | 0 (0 to 0)   | 0 (0 to 0)    | -31.5% (-35.7% to -27.8%) |
| United States of America     | Poisoning by carbon monoxide                    | 0 (0 to 0)   | 0 (0 to 0)    | -0.8% (-4.9% to 2.9%)     |
| United States of America     | Poisoning by other means                        | 0 (0 to 0)   | 0 (0 to 0)    | -18.9% (-22.1% to -15.3%) |
| United States of America     | Pulmonary aspiration and foreign body in airway | 0 (0 to 0)   | 0 (0 to 0)    | 9.9% (6.5% to 13.2%)      |
| United States of America     | Self-harm by firearm                            | 0 (0 to 0)   | 0 (0 to 0)    | -13.6% (-19.2% to -8.3%)  |
| United States of America     | Self-harm by other specified means              | 0 (0 to 0)   | 0 (0 to 0)    | 13.2% (10% to 16.1%)      |
| United States of America     | Unintentional firearm injuries                  | 0 (0 to 0)   | 0 (0 to 0)    | -46.3% (-53% to -41.1%)   |
| United States of America     | Venomous animal contact                         | 0 (0 to 0)   | 0 (0 to 0)    | -4.6% (-9.4% to -0.8%)    |
| United States Virgin Islands | Adverse effects of medical treatment            | 0 (0 to 0)   | 0 (0 to 0)    | 0% (0% to 0%)             |
| United States Virgin Islands | Conflict and terrorism                          | 0 (0 to 0)   | 0 (0 to 0)    | NA                        |
| United States Virgin Islands | Cyclist road injuries                           | 1 (0 to 2)   | 1 (0 to 1)    | -26.3% (-34.6% to -17.7%) |
| United States Virgin Islands | Drowning                                        | 0 (0 to 0)   | 0 (0 to 0)    | 35.3% (24% to 47.1%)      |
| United States Virgin Islands | Environmental heat and cold exposure            | 0 (0 to 1)   | 0 (0 to 1)    | -3.5% (-7.1% to -0.1%)    |
| United States Virgin Islands | Executions and police conflict                  | 0 (0 to 0)   | 0 (0 to 0)    | NA                        |
| United States Virgin Islands | Exposure to forces of nature                    | 0 (0 to 0)   | 0 (0 to 0)    | NA                        |
| United States Virgin Islands | Falls                                           | 4 (2 to 5)   | 5 (3 to 7)    | 38.9% (33.9% to 43.8%)    |
| United States Virgin Islands | Fire, heat, and hot substances                  | 0 (0 to 0)   | 0 (0 to 0)    | 0.4% (-5.1% to 5.1%)      |
| United States Virgin Islands | Foreign body in eyes                            | 0 (0 to 0)   | 0 (0 to 0)    | 0% (0% to 0%)             |
| United States Virgin Islands | Foreign body in other body part                 | 0 (0 to 0)   | 0 (0 to 0)    | -1.4% (-5.8% to 3.5%)     |
| United States Virgin Islands | Motor vehicle road injuries                     | 1 (1 to 2)   | 1 (0 to 1)    | -29.2% (-36.9% to -21.4%) |
| United States Virgin Islands | Motorcyclist road injuries                      | 1 (0 to 1)   | 1 (0 to 1)    | 8.6% (-3.5% to 23.3%)     |
| United States Virgin Islands | Non-venomous animal contact                     | 0 (0 to 0)   | 0 (0 to 0)    | -15.2% (-18.9% to -10.8%) |
| United States Virgin Islands | Other exposure to mechanical forces             | 1 (0 to 1)   | 1 (0 to 1)    | 17.8% (11.5% to 24.4%)    |
| United States Virgin Islands | Other road injuries                             | 0 (0 to 0)   | 0 (0 to 0)    | -20.1% (-29.8% to -9.1%)  |
| United States Virgin Islands | Other transport injuries                        | 0 (0 to 1)   | 0 (0 to 1)    | 3.5% (-1.7% to 8.9%)      |

|                              |                                                 |            |            |                           |
|------------------------------|-------------------------------------------------|------------|------------|---------------------------|
| United States Virgin Islands | Other unintentional injuries                    | 0 (0 to 1) | 0 (0 to 1) | -3.4% (-8.2% to 1.2%)     |
| United States Virgin Islands | Pedestrian road injuries                        | 1 (0 to 2) | 1 (0 to 1) | -39% (-45.4% to -32.2%)   |
| United States Virgin Islands | Physical violence by firearm                    | 0 (0 to 0) | 0 (0 to 0) | 31.7% (10.1% to 61.2%)    |
| United States Virgin Islands | Physical violence by other means                | 0 (0 to 1) | 0 (0 to 1) | -10.8% (-19.3% to -2.3%)  |
| United States Virgin Islands | Physical violence by sharp object               | 0 (0 to 0) | 0 (0 to 0) | -28.2% (-39% to -18.2%)   |
| United States Virgin Islands | Poisoning by carbon monoxide                    | 0 (0 to 0) | 0 (0 to 0) | 10.4% (-1.1% to 23.3%)    |
| United States Virgin Islands | Poisoning by other means                        | 0 (0 to 0) | 0 (0 to 0) | -7.9% (-15.1% to -0.2%)   |
| United States Virgin Islands | Pulmonary aspiration and foreign body in airway | 0 (0 to 0) | 0 (0 to 0) | -15.2% (-24.4% to -5.7%)  |
| United States Virgin Islands | Self-harm by firearm                            | 0 (0 to 0) | 0 (0 to 0) | -1.7% (-11.6% to 11%)     |
| United States Virgin Islands | Self-harm by other specified means              | 0 (0 to 0) | 0 (0 to 0) | -25.1% (-33.4% to -17%)   |
| United States Virgin Islands | Unintentional firearm injuries                  | 0 (0 to 0) | 0 (0 to 0) | 16.7% (8.6% to 24.8%)     |
| United States Virgin Islands | Venomous animal contact                         | 0 (0 to 0) | 0 (0 to 0) | -18.1% (-22.4% to -13.5%) |
| Uruguay                      | Adverse effects of medical treatment            | 0 (0 to 0) | 0 (0 to 0) | 0% (0% to 0%)             |
| Uruguay                      | Conflict and terrorism                          | 0 (0 to 0) | 0 (0 to 0) | NA                        |
| Uruguay                      | Cyclist road injuries                           | 0 (0 to 0) | 0 (0 to 0) | 7.7% (-3.4% to 21.8%)     |
| Uruguay                      | Drowning                                        | 0 (0 to 0) | 0 (0 to 0) | 10.5% (-3% to 24.5%)      |
| Uruguay                      | Environmental heat and cold exposure            | 0 (0 to 0) | 0 (0 to 0) | 10.4% (6.2% to 15.4%)     |
| Uruguay                      | Executions and police conflict                  | 0 (0 to 0) | 0 (0 to 0) | NA                        |
| Uruguay                      | Exposure to forces of nature                    | 0 (0 to 0) | 0 (0 to 0) | NA                        |
| Uruguay                      | Falls                                           | 3 (2 to 4) | 3 (2 to 5) | 10.2% (6.6% to 13.8%)     |
| Uruguay                      | Fire, heat, and hot substances                  | 0 (0 to 0) | 0 (0 to 0) | 9.4% (4.5% to 14.1%)      |
| Uruguay                      | Foreign body in eyes                            | 0 (0 to 0) | 0 (0 to 0) | 0% (0% to 0%)             |
| Uruguay                      | Foreign body in other body part                 | 0 (0 to 0) | 0 (0 to 0) | -0.4% (-4.3% to 3.6%)     |
| Uruguay                      | Motor vehicle road injuries                     | 1 (0 to 1) | 1 (0 to 1) | 2.4% (-7.9% to 13.4%)     |
| Uruguay                      | Motorcyclist road injuries                      | 0 (0 to 0) | 0 (0 to 0) | 79.1% (56.1% to 110%)     |
| Uruguay                      | Non-venomous animal contact                     | 0 (0 to 0) | 0 (0 to 0) | -11.4% (-14.9% to -7.7%)  |
| Uruguay                      | Other exposure to mechanical forces             | 1 (1 to 2) | 1 (0 to 2) | -14.2% (-24.8% to 0.2%)   |
| Uruguay                      | Other road injuries                             | 0 (0 to 0) | 0 (0 to 0) | -2.9% (-13.9% to 9.6%)    |
| Uruguay                      | Other transport injuries                        | 0 (0 to 0) | 0 (0 to 0) | 1.7% (-2.5% to 5.7%)      |
| Uruguay                      | Other unintentional injuries                    | 0 (0 to 1) | 0 (0 to 1) | -24.3% (-29.9% to -18.1%) |
| Uruguay                      | Pedestrian road injuries                        | 0 (0 to 0) | 0 (0 to 0) | -22.2% (-31.1% to -11.8%) |
| Uruguay                      | Physical violence by firearm                    | 0 (0 to 0) | 0 (0 to 0) | 167.8% (128.6% to 226.4%) |
| Uruguay                      | Physical violence by other means                | 0 (0 to 1) | 0 (0 to 1) | 15.6% (0.6% to 31.1%)     |
| Uruguay                      | Physical violence by sharp object               | 0 (0 to 0) | 0 (0 to 0) | 54.9% (30.7% to 83.5%)    |
| Uruguay                      | Poisoning by carbon monoxide                    | 0 (0 to 0) | 0 (0 to 0) | 32.7% (20.5% to 46.3%)    |
| Uruguay                      | Poisoning by other means                        | 0 (0 to 0) | 0 (0 to 0) | -1.5% (-9.2% to 7%)       |
| Uruguay                      | Pulmonary aspiration and foreign body in airway | 0 (0 to 0) | 0 (0 to 0) | -27.9% (-34.3% to -21.2%) |
| Uruguay                      | Self-harm by firearm                            | 0 (0 to 0) | 0 (0 to 0) | 17.1% (1.9% to 33%)       |
| Uruguay                      | Self-harm by other specified means              | 0 (0 to 0) | 0 (0 to 1) | 80% (68.5% to 94.7%)      |
| Uruguay                      | Unintentional firearm injuries                  | 1 (0 to 2) | 0 (0 to 1) | -52.5% (-60.1% to -44.7%) |
| Uruguay                      | Venomous animal contact                         | 0 (0 to 0) | 0 (0 to 0) | -16.5% (-21.7% to -11.9%) |
| Uzbekistan                   | Adverse effects of medical treatment            | 0 (0 to 0) | 0 (0 to 0) | 0% (0% to 0%)             |
| Uzbekistan                   | Conflict and terrorism                          | 0 (0 to 0) | 0 (0 to 0) | NA                        |

|            |                                                 |            |            |                           |
|------------|-------------------------------------------------|------------|------------|---------------------------|
| Uzbekistan | Cyclist road injuries                           | 0 (0 to 0) | 0 (0 to 0) | 15.4% (2.8% to 25.9%)     |
| Uzbekistan | Drowning                                        | 0 (0 to 0) | 0 (0 to 0) | 9.5% (-1.5% to 20.9%)     |
| Uzbekistan | Environmental heat and cold exposure            | 0 (0 to 0) | 0 (0 to 0) | -21.3% (-29.8% to -13.6%) |
| Uzbekistan | Executions and police conflict                  | 0 (0 to 0) | 0 (0 to 0) | NA                        |
| Uzbekistan | Exposure to forces of nature                    | 0 (0 to 0) | 0 (0 to 0) | NA                        |
| Uzbekistan | Falls                                           | 3 (2 to 3) | 3 (2 to 3) | 0.6% (-4.7% to 5.4%)      |
| Uzbekistan | Fire, heat, and hot substances                  | 0 (0 to 0) | 0 (0 to 0) | -23.3% (-29.1% to -17.3%) |
| Uzbekistan | Foreign body in eyes                            | 0 (0 to 0) | 0 (0 to 0) | 0% (0% to 0%)             |
| Uzbekistan | Foreign body in other body part                 | 0 (0 to 0) | 0 (0 to 0) | -1.9% (-6% to 2.8%)       |
| Uzbekistan | Motor vehicle road injuries                     | 1 (0 to 1) | 1 (1 to 2) | 24.2% (11.5% to 36.4%)    |
| Uzbekistan | Motorcyclist road injuries                      | 0 (0 to 0) | 0 (0 to 0) | 6.2% (-7.6% to 20.4%)     |
| Uzbekistan | Non-venomous animal contact                     | 0 (0 to 0) | 0 (0 to 0) | -11.9% (-16.1% to -7.4%)  |
| Uzbekistan | Other exposure to mechanical forces             | 0 (0 to 1) | 1 (0 to 1) | 6% (1.4% to 11.2%)        |
| Uzbekistan | Other road injuries                             | 0 (0 to 0) | 0 (0 to 0) | 11.8% (-2% to 24.3%)      |
| Uzbekistan | Other transport injuries                        | 0 (0 to 0) | 0 (0 to 0) | 1.6% (-2.7% to 5.9%)      |
| Uzbekistan | Other unintentional injuries                    | 0 (0 to 1) | 0 (0 to 0) | -19.5% (-26.2% to -12.6%) |
| Uzbekistan | Pedestrian road injuries                        | 0 (0 to 1) | 0 (0 to 1) | 3.6% (-9.5% to 16.6%)     |
| Uzbekistan | Physical violence by firearm                    | 0 (0 to 0) | 0 (0 to 0) | 67.7% (43.5% to 98.7%)    |
| Uzbekistan | Physical violence by other means                | 0 (0 to 0) | 0 (0 to 0) | -23.8% (-34.4% to -12.9%) |
| Uzbekistan | Physical violence by sharp object               | 0 (0 to 0) | 0 (0 to 0) | -38.7% (-48.5% to -29.5%) |
| Uzbekistan | Poisoning by carbon monoxide                    | 0 (0 to 0) | 0 (0 to 0) | 23.6% (12.7% to 35.5%)    |
| Uzbekistan | Poisoning by other means                        | 0 (0 to 0) | 0 (0 to 0) | -2.1% (-7.8% to 5.5%)     |
| Uzbekistan | Pulmonary aspiration and foreign body in airway | 0 (0 to 0) | 0 (0 to 0) | -11.2% (-18.4% to -3.9%)  |
| Uzbekistan | Self-harm by firearm                            | 0 (0 to 0) | 0 (0 to 0) | 20.4% (1.1% to 45.7%)     |
| Uzbekistan | Self-harm by other specified means              | 0 (0 to 0) | 0 (0 to 1) | 73% (59.8% to 85.6%)      |
| Uzbekistan | Unintentional firearm injuries                  | 0 (0 to 0) | 0 (0 to 0) | 4.4% (-3.4% to 13.5%)     |
| Uzbekistan | Venomous animal contact                         | 0 (0 to 0) | 0 (0 to 0) | -11.7% (-17.1% to -5.7%)  |
| Vanuatu    | Adverse effects of medical treatment            | 0 (0 to 0) | 0 (0 to 0) | 0% (0% to 0%)             |
| Vanuatu    | Conflict and terrorism                          | 0 (0 to 0) | 0 (0 to 0) | NA                        |
| Vanuatu    | Cyclist road injuries                           | 0 (0 to 0) | 0 (0 to 0) | 6.1% (-0.9% to 13.5%)     |
| Vanuatu    | Drowning                                        | 0 (0 to 0) | 0 (0 to 0) | -0.2% (-8.3% to 9.3%)     |
| Vanuatu    | Environmental heat and cold exposure            | 0 (0 to 0) | 0 (0 to 0) | -4.3% (-9.2% to 0.5%)     |
| Vanuatu    | Executions and police conflict                  | 0 (0 to 0) | 0 (0 to 0) | NA                        |
| Vanuatu    | Exposure to forces of nature                    | 0 (0 to 0) | 0 (0 to 0) | NA                        |
| Vanuatu    | Falls                                           | 1 (1 to 1) | 1 (1 to 2) | 38.6% (33% to 44.3%)      |
| Vanuatu    | Fire, heat, and hot substances                  | 0 (0 to 0) | 0 (0 to 0) | -4.7% (-9.1% to 0.1%)     |
| Vanuatu    | Foreign body in eyes                            | 0 (0 to 0) | 0 (0 to 0) | 0% (0% to 0%)             |
| Vanuatu    | Foreign body in other body part                 | 0 (0 to 0) | 0 (0 to 0) | -4.3% (-7.7% to -0.9%)    |
| Vanuatu    | Motor vehicle road injuries                     | 0 (0 to 1) | 0 (0 to 1) | -0.3% (-7.4% to 6.6%)     |
| Vanuatu    | Motorcyclist road injuries                      | 0 (0 to 0) | 0 (0 to 0) | 15.7% (5.9% to 26.6%)     |
| Vanuatu    | Non-venomous animal contact                     | 0 (0 to 0) | 0 (0 to 0) | -15.3% (-19.2% to -11.2%) |
| Vanuatu    | Other exposure to mechanical forces             | 0 (0 to 0) | 0 (0 to 0) | -13.9% (-19.7% to -7.9%)  |
| Vanuatu    | Other road injuries                             | 0 (0 to 0) | 0 (0 to 0) | 3.1% (-6% to 12.4%)       |



|                                    |                                                 |            |            |                           |
|------------------------------------|-------------------------------------------------|------------|------------|---------------------------|
| Vanuatu                            | Other transport injuries                        | 0 (0 to 0) | 0 (0 to 0) | -6.3% (-10.1% to -2.2%)   |
| Vanuatu                            | Other unintentional injuries                    | 0 (0 to 0) | 0 (0 to 0) | -7% (-11% to -2.5%)       |
| Vanuatu                            | Pedestrian road injuries                        | 0 (0 to 0) | 0 (0 to 0) | 7.3% (-0.4% to 15.2%)     |
| Vanuatu                            | Physical violence by firearm                    | 0 (0 to 0) | 0 (0 to 0) | 14.2% (4.3% to 25.6%)     |
| Vanuatu                            | Physical violence by other means                | 0 (0 to 0) | 0 (0 to 0) | 3.1% (-2.3% to 9.7%)      |
| Vanuatu                            | Physical violence by sharp object               | 0 (0 to 0) | 0 (0 to 0) | -6.2% (-14% to 1.3%)      |
| Vanuatu                            | Poisoning by carbon monoxide                    | 0 (0 to 0) | 0 (0 to 0) | 1.6% (-8.8% to 11.5%)     |
| Vanuatu                            | Poisoning by other means                        | 0 (0 to 0) | 0 (0 to 0) | -17.1% (-23.3% to -10.7%) |
| Vanuatu                            | Pulmonary aspiration and foreign body in airway | 0 (0 to 0) | 0 (0 to 0) | 1% (-9.9% to 12.7%)       |
| Vanuatu                            | Self-harm by firearm                            | 0 (0 to 0) | 0 (0 to 0) | -2.5% (-18.1% to 14.3%)   |
| Vanuatu                            | Self-harm by other specified means              | 0 (0 to 0) | 0 (0 to 0) | 2.6% (-3.7% to 9.5%)      |
| Vanuatu                            | Unintentional firearm injuries                  | 0 (0 to 0) | 0 (0 to 0) | -23.5% (-29.4% to -18%)   |
| Vanuatu                            | Venomous animal contact                         | 0 (0 to 0) | 0 (0 to 0) | -8.8% (-15.3% to -1.7%)   |
| Venezuela (Bolivarian Republic of) | Adverse effects of medical treatment            | 0 (0 to 0) | 0 (0 to 0) | 0% (0% to 0%)             |
| Venezuela (Bolivarian Republic of) | Conflict and terrorism                          | 0 (0 to 0) | 0 (0 to 0) | NA                        |
| Venezuela (Bolivarian Republic of) | Cyclist road injuries                           | 0 (0 to 1) | 0 (0 to 0) | -32.9% (-41.1% to -24.2%) |
| Venezuela (Bolivarian Republic of) | Drowning                                        | 0 (0 to 0) | 0 (0 to 0) | 23.1% (5.1% to 41.7%)     |
| Venezuela (Bolivarian Republic of) | Environmental heat and cold exposure            | 0 (0 to 0) | 0 (0 to 0) | 0.3% (-4% to 4.2%)        |
| Venezuela (Bolivarian Republic of) | Executions and police conflict                  | 0 (0 to 0) | 0 (0 to 0) | NA                        |
| Venezuela (Bolivarian Republic of) | Exposure to forces of nature                    | 0 (0 to 0) | 0 (0 to 0) | NA                        |
| Venezuela (Bolivarian Republic of) | Falls                                           | 2 (2 to 3) | 2 (2 to 3) | -7.4% (-11.8% to -2.9%)   |
| Venezuela (Bolivarian Republic of) | Fire, heat, and hot substances                  | 0 (0 to 0) | 0 (0 to 0) | -7.5% (-12.3% to -1.8%)   |
| Venezuela (Bolivarian Republic of) | Foreign body in eyes                            | 0 (0 to 0) | 0 (0 to 0) | 0% (0% to 0%)             |
| Venezuela (Bolivarian Republic of) | Foreign body in other body part                 | 0 (0 to 0) | 0 (0 to 0) | -14% (-18.8% to -10%)     |
| Venezuela (Bolivarian Republic of) | Motor vehicle road injuries                     | 1 (0 to 2) | 1 (0 to 1) | -17.5% (-26.8% to -7.3%)  |
| Venezuela (Bolivarian Republic of) | Motorcyclist road injuries                      | 0 (0 to 0) | 0 (0 to 0) | 9.3% (-5.3% to 26.3%)     |
| Venezuela (Bolivarian Republic of) | Non-venomous animal contact                     | 0 (0 to 0) | 0 (0 to 0) | -13.8% (-18.5% to -9.5%)  |
| Venezuela (Bolivarian Republic of) | Other exposure to mechanical forces             | 0 (0 to 1) | 0 (0 to 1) | 6.4% (-1.3% to 15.9%)     |
| Venezuela (Bolivarian Republic of) | Other road injuries                             | 0 (0 to 0) | 0 (0 to 0) | -23.7% (-33.4% to -13.3%) |
| Venezuela (Bolivarian Republic of) | Other transport injuries                        | 0 (0 to 0) | 0 (0 to 0) | 5.3% (0.2% to 11.4%)      |
| Venezuela (Bolivarian Republic of) | Other unintentional injuries                    | 0 (0 to 0) | 0 (0 to 0) | -20% (-25.4% to -14.1%)   |
| Venezuela (Bolivarian Republic of) | Pedestrian road injuries                        | 0 (0 to 1) | 0 (0 to 1) | -41.9% (-49.1% to -34.7%) |
| Venezuela (Bolivarian Republic of) | Physical violence by firearm                    | 0 (0 to 0) | 1 (0 to 1) | 222.6% (148.7% to 336.3%) |
| Venezuela (Bolivarian Republic of) | Physical violence by other means                | 0 (0 to 0) | 0 (0 to 0) | 22.9% (2.4% to 48%)       |
| Venezuela (Bolivarian Republic of) | Physical violence by sharp object               | 0 (0 to 0) | 0 (0 to 0) | -11.6% (-30.8% to 7.2%)   |
| Venezuela (Bolivarian Republic of) | Poisoning by carbon monoxide                    | 0 (0 to 0) | 0 (0 to 0) | 17.1% (5.2% to 30.5%)     |
| Venezuela (Bolivarian Republic of) | Poisoning by other means                        | 0 (0 to 0) | 0 (0 to 0) | -9.4% (-16.2% to -1.6%)   |
| Venezuela (Bolivarian Republic of) | Pulmonary aspiration and foreign body in airway | 0 (0 to 0) | 0 (0 to 0) | -29.8% (-37.3% to -21.4%) |
| Venezuela (Bolivarian Republic of) | Self-harm by firearm                            | 0 (0 to 0) | 0 (0 to 0) | 39.9% (24.7% to 60.4%)    |
| Venezuela (Bolivarian Republic of) | Self-harm by other specified means              | 0 (0 to 0) | 0 (0 to 0) | 26.2% (15.2% to 36.4%)    |
| Venezuela (Bolivarian Republic of) | Unintentional firearm injuries                  | 0 (0 to 1) | 0 (0 to 1) | 11.7% (0.3% to 25.4%)     |
| Venezuela (Bolivarian Republic of) | Venomous animal contact                         | 0 (0 to 0) | 0 (0 to 0) | -7.4% (-12.3% to -1.4%)   |
| Viet Nam                           | Adverse effects of medical treatment            | 0 (0 to 0) | 0 (0 to 0) | 0% (0% to 0%)             |

|          |                                                 |            |              |                           |
|----------|-------------------------------------------------|------------|--------------|---------------------------|
| Viet Nam | Conflict and terrorism                          | 0 (0 to 0) | 0 (0 to 0)   | NA                        |
| Viet Nam | Cyclist road injuries                           | 0 (0 to 0) | 0 (0 to 0)   | 38.1% (26.5% to 50.7%)    |
| Viet Nam | Drowning                                        | 0 (0 to 0) | 0 (0 to 0)   | 40.9% (23.7% to 59.3%)    |
| Viet Nam | Environmental heat and cold exposure            | 0 (0 to 0) | 0 (0 to 0)   | 1.1% (-4.5% to 6.2%)      |
| Viet Nam | Executions and police conflict                  | 0 (0 to 0) | 0 (0 to 0)   | NA                        |
| Viet Nam | Exposure to forces of nature                    | 0 (0 to 0) | 0 (0 to 0)   | NA                        |
| Viet Nam | Falls                                           | 2 (1 to 2) | 3 (2 to 4)   | 67.6% (61% to 74.1%)      |
| Viet Nam | Fire, heat, and hot substances                  | 0 (0 to 0) | 0 (0 to 0)   | 14.4% (7.4% to 21.9%)     |
| Viet Nam | Foreign body in eyes                            | 0 (0 to 0) | 0 (0 to 0)   | 0% (0% to 0%)             |
| Viet Nam | Foreign body in other body part                 | 0 (0 to 0) | 0 (0 to 0)   | 3.5% (-2.5% to 10.4%)     |
| Viet Nam | Motor vehicle road injuries                     | 1 (0 to 1) | 1 (0 to 1)   | 24.4% (14.1% to 35.5%)    |
| Viet Nam | Motorcyclist road injuries                      | 1 (0 to 1) | 1 (0 to 1)   | 42.5% (30.3% to 57%)      |
| Viet Nam | Non-venomous animal contact                     | 0 (0 to 0) | 0 (0 to 0)   | -27.4% (-32% to -21.7%)   |
| Viet Nam | Other exposure to mechanical forces             | 0 (0 to 1) | 0 (0 to 0)   | -11.5% (-17.7% to -3%)    |
| Viet Nam | Other road injuries                             | 0 (0 to 0) | 0 (0 to 0)   | 23% (12% to 37.1%)        |
| Viet Nam | Other transport injuries                        | 0 (0 to 0) | 0 (0 to 0)   | 2.1% (-2.9% to 7.1%)      |
| Viet Nam | Other unintentional injuries                    | 0 (0 to 0) | 0 (0 to 0)   | -26.8% (-31.3% to -21.7%) |
| Viet Nam | Pedestrian road injuries                        | 0 (0 to 0) | 0 (0 to 0)   | -14.7% (-22.2% to -7.1%)  |
| Viet Nam | Physical violence by firearm                    | 0 (0 to 0) | 0 (0 to 0)   | 131.5% (103.1% to 167.3%) |
| Viet Nam | Physical violence by other means                | 0 (0 to 0) | 0 (0 to 0)   | 3.1% (-4.7% to 12.7%)     |
| Viet Nam | Physical violence by sharp object               | 0 (0 to 0) | 0 (0 to 0)   | -24.8% (-34.2% to -15.8%) |
| Viet Nam | Poisoning by carbon monoxide                    | 0 (0 to 0) | 0 (0 to 0)   | 11.4% (0.7% to 23.7%)     |
| Viet Nam | Poisoning by other means                        | 0 (0 to 0) | 0 (0 to 0)   | -31.4% (-38.8% to -23%)   |
| Viet Nam | Pulmonary aspiration and foreign body in airway | 0 (0 to 0) | 0 (0 to 0)   | -21.7% (-28.4% to -13.7%) |
| Viet Nam | Self-harm by firearm                            | 0 (0 to 0) | 0 (0 to 0)   | 89% (63.8% to 127.1%)     |
| Viet Nam | Self-harm by other specified means              | 0 (0 to 0) | 0 (0 to 0)   | 5.6% (-0.1% to 12.9%)     |
| Viet Nam | Unintentional firearm injuries                  | 0 (0 to 0) | 0 (0 to 0)   | -31.3% (-39.5% to -23.8%) |
| Viet Nam | Venomous animal contact                         | 0 (0 to 0) | 0 (0 to 0)   | -30.8% (-38.5% to -22.7%) |
| Yemen    | Adverse effects of medical treatment            | 0 (0 to 0) | 0 (0 to 0)   | 0% (0% to 0%)             |
| Yemen    | Conflict and terrorism                          | 0 (0 to 0) | 22 (5 to 66) | NA                        |
| Yemen    | Cyclist road injuries                           | 0 (0 to 0) | 0 (0 to 0)   | -0.2% (-7.8% to 8.9%)     |
| Yemen    | Drowning                                        | 0 (0 to 0) | 0 (0 to 0)   | -21.5% (-29.1% to -11.9%) |
| Yemen    | Environmental heat and cold exposure            | 0 (0 to 0) | 0 (0 to 0)   | 0.6% (-4.3% to 5.6%)      |
| Yemen    | Executions and police conflict                  | 0 (0 to 0) | 0 (0 to 0)   | NA                        |
| Yemen    | Exposure to forces of nature                    | 0 (0 to 0) | 0 (0 to 0)   | NA                        |
| Yemen    | Falls                                           | 1 (1 to 2) | 2 (1 to 2)   | 18% (13.7% to 22.5%)      |
| Yemen    | Fire, heat, and hot substances                  | 0 (0 to 0) | 0 (0 to 0)   | -32.9% (-38% to -28.1%)   |
| Yemen    | Foreign body in eyes                            | 0 (0 to 0) | 0 (0 to 0)   | 0% (0% to 0%)             |
| Yemen    | Foreign body in other body part                 | 0 (0 to 0) | 0 (0 to 0)   | -1.3% (-5.1% to 2.2%)     |
| Yemen    | Motor vehicle road injuries                     | 1 (0 to 1) | 1 (0 to 1)   | -16% (-21.6% to -9.7%)    |
| Yemen    | Motorcyclist road injuries                      | 0 (0 to 0) | 0 (0 to 0)   | -18.9% (-26.8% to -10.1%) |
| Yemen    | Non-venomous animal contact                     | 0 (0 to 0) | 0 (0 to 0)   | 7.3% (2.6% to 11.8%)      |
| Yemen    | Other exposure to mechanical forces             | 0 (0 to 1) | 0 (0 to 0)   | -15% (-20.3% to -9.6%)    |

|        |                                                 |            |            |                           |
|--------|-------------------------------------------------|------------|------------|---------------------------|
| Yemen  | Other road injuries                             | 0 (0 to 0) | 0 (0 to 0) | 3.3% (-6.2% to 13.7%)     |
| Yemen  | Other transport injuries                        | 0 (0 to 0) | 0 (0 to 0) | -0.4% (-4.8% to 4.3%)     |
| Yemen  | Other unintentional injuries                    | 0 (0 to 0) | 0 (0 to 0) | -22.7% (-26.5% to -19%)   |
| Yemen  | Pedestrian road injuries                        | 0 (0 to 1) | 0 (0 to 0) | -14.6% (-21.6% to -7.2%)  |
| Yemen  | Physical violence by firearm                    | 0 (0 to 0) | 0 (0 to 0) | 99.7% (74.8% to 131.9%)   |
| Yemen  | Physical violence by other means                | 0 (0 to 0) | 0 (0 to 0) | 33.5% (22.3% to 47.9%)    |
| Yemen  | Physical violence by sharp object               | 0 (0 to 0) | 0 (0 to 0) | -8.5% (-18.7% to 2.4%)    |
| Yemen  | Poisoning by carbon monoxide                    | 0 (0 to 0) | 0 (0 to 0) | 14.6% (-0.2% to 31.1%)    |
| Yemen  | Poisoning by other means                        | 0 (0 to 0) | 0 (0 to 0) | -30.7% (-37.5% to -23%)   |
| Yemen  | Pulmonary aspiration and foreign body in airway | 0 (0 to 0) | 0 (0 to 0) | -13.3% (-21.4% to -3.2%)  |
| Yemen  | Self-harm by firearm                            | 0 (0 to 0) | 0 (0 to 0) | 21.6% (8% to 36.4%)       |
| Yemen  | Self-harm by other specified means              | 0 (0 to 0) | 0 (0 to 0) | 7.3% (1.5% to 13.5%)      |
| Yemen  | Unintentional firearm injuries                  | 0 (0 to 0) | 0 (0 to 0) | -17.6% (-24.5% to -10.6%) |
| Yemen  | Venomous animal contact                         | 0 (0 to 0) | 0 (0 to 0) | 8.6% (1.6% to 16.5%)      |
| Zambia | Adverse effects of medical treatment            | 0 (0 to 0) | 0 (0 to 0) | 0% (0% to 0%)             |
| Zambia | Conflict and terrorism                          | 0 (0 to 1) | 0 (0 to 0) | NA                        |
| Zambia | Cyclist road injuries                           | 1 (1 to 3) | 1 (1 to 3) | 1.7% (-5.1% to 9.1%)      |
| Zambia | Drowning                                        | 0 (0 to 0) | 0 (0 to 0) | -3.3% (-12% to 6.2%)      |
| Zambia | Environmental heat and cold exposure            | 0 (0 to 0) | 0 (0 to 0) | -7.9% (-14% to -1.2%)     |
| Zambia | Executions and police conflict                  | 0 (0 to 0) | 0 (0 to 0) | NA                        |
| Zambia | Exposure to forces of nature                    | 0 (0 to 0) | 0 (0 to 0) | NA                        |
| Zambia | Falls                                           | 4 (2 to 5) | 4 (3 to 6) | 25.5% (20.7% to 30.1%)    |
| Zambia | Fire, heat, and hot substances                  | 0 (0 to 0) | 0 (0 to 0) | -16.2% (-20.7% to -11%)   |
| Zambia | Foreign body in eyes                            | 0 (0 to 0) | 0 (0 to 0) | 0% (0% to 0%)             |
| Zambia | Foreign body in other body part                 | 1 (0 to 1) | 1 (0 to 1) | 3.2% (-0.5% to 7.5%)      |
| Zambia | Motor vehicle road injuries                     | 1 (0 to 1) | 1 (0 to 1) | -0.6% (-8.9% to 8.6%)     |
| Zambia | Motorcyclist road injuries                      | 0 (0 to 1) | 0 (0 to 1) | -11.2% (-18.6% to -3.3%)  |
| Zambia | Non-venomous animal contact                     | 0 (0 to 1) | 0 (0 to 1) | -21.2% (-25.3% to -16.7%) |
| Zambia | Other exposure to mechanical forces             | 0 (0 to 0) | 0 (0 to 0) | -12.8% (-18.2% to -6.8%)  |
| Zambia | Other road injuries                             | 0 (0 to 0) | 0 (0 to 0) | 15.5% (4.7% to 26.6%)     |
| Zambia | Other transport injuries                        | 0 (0 to 1) | 0 (0 to 1) | -16.5% (-20.7% to -12.7%) |
| Zambia | Other unintentional injuries                    | 0 (0 to 0) | 0 (0 to 0) | -18.2% (-24.4% to -11.2%) |
| Zambia | Pedestrian road injuries                        | 2 (1 to 3) | 1 (1 to 3) | -8% (-14% to -1.1%)       |
| Zambia | Physical violence by firearm                    | 0 (0 to 0) | 0 (0 to 0) | 88.4% (68.4% to 110%)     |
| Zambia | Physical violence by other means                | 0 (0 to 0) | 0 (0 to 0) | 52.3% (37% to 67.8%)      |
| Zambia | Physical violence by sharp object               | 0 (0 to 0) | 0 (0 to 0) | 61.2% (39.4% to 82.7%)    |
| Zambia | Poisoning by carbon monoxide                    | 0 (0 to 0) | 0 (0 to 0) | 18.9% (5.1% to 32.7%)     |
| Zambia | Poisoning by other means                        | 0 (0 to 0) | 0 (0 to 0) | -24.4% (-32.2% to -16.5%) |
| Zambia | Pulmonary aspiration and foreign body in airway | 0 (0 to 0) | 0 (0 to 0) | -12.7% (-23.4% to -0.6%)  |
| Zambia | Self-harm by firearm                            | 0 (0 to 0) | 0 (0 to 0) | 35.8% (20.9% to 58.1%)    |
| Zambia | Self-harm by other specified means              | 0 (0 to 0) | 0 (0 to 0) | 7.7% (1.1% to 15%)        |
| Zambia | Unintentional firearm injuries                  | 0 (0 to 0) | 0 (0 to 0) | -24% (-31.5% to -16.4%)   |
| Zambia | Venomous animal contact                         | 0 (0 to 0) | 0 (0 to 0) | -26.5% (-34.9% to -17.9%) |

|          |                                                 |            |            |                           |
|----------|-------------------------------------------------|------------|------------|---------------------------|
| Zimbabwe | Adverse effects of medical treatment            | 0 (0 to 0) | 0 (0 to 0) | 0% (0% to 0%)             |
| Zimbabwe | Conflict and terrorism                          | 0 (0 to 0) | 0 (0 to 0) | NA                        |
| Zimbabwe | Cyclist road injuries                           | 0 (0 to 1) | 1 (0 to 1) | 26% (11.1% to 44.3%)      |
| Zimbabwe | Drowning                                        | 0 (0 to 0) | 0 (0 to 0) | -18.8% (-24.9% to -12.7%) |
| Zimbabwe | Environmental heat and cold exposure            | 0 (0 to 0) | 0 (0 to 0) | -1.4% (-7.2% to 4.5%)     |
| Zimbabwe | Executions and police conflict                  | 0 (0 to 0) | 0 (0 to 0) | NA                        |
| Zimbabwe | Exposure to forces of nature                    | 0 (0 to 0) | 1 (1 to 3) | NA                        |
| Zimbabwe | Falls                                           | 3 (2 to 4) | 3 (2 to 4) | -0.4% (-3.7% to 3.1%)     |
| Zimbabwe | Fire, heat, and hot substances                  | 0 (0 to 0) | 0 (0 to 0) | 6.6% (0.5% to 12.5%)      |
| Zimbabwe | Foreign body in eyes                            | 0 (0 to 0) | 0 (0 to 0) | 0% (0% to 0%)             |
| Zimbabwe | Foreign body in other body part                 | 1 (1 to 1) | 1 (0 to 1) | -5.1% (-8.6% to -1%)      |
| Zimbabwe | Motor vehicle road injuries                     | 1 (0 to 1) | 1 (0 to 1) | 23.2% (9% to 40.8%)       |
| Zimbabwe | Motorcyclist road injuries                      | 0 (0 to 1) | 0 (0 to 0) | -19.6% (-29.2% to -8.7%)  |
| Zimbabwe | Non-venomous animal contact                     | 0 (0 to 0) | 0 (0 to 1) | 6% (0.9% to 10.9%)        |
| Zimbabwe | Other exposure to mechanical forces             | 0 (0 to 0) | 0 (0 to 0) | -8.7% (-13.1% to -3.7%)   |
| Zimbabwe | Other road injuries                             | 0 (0 to 0) | 0 (0 to 0) | 41.8% (22.2% to 69.3%)    |
| Zimbabwe | Other transport injuries                        | 0 (0 to 1) | 1 (0 to 1) | 24.1% (17.8% to 30.8%)    |
| Zimbabwe | Other unintentional injuries                    | 0 (0 to 0) | 0 (0 to 0) | -7.1% (-10.9% to -2.6%)   |
| Zimbabwe | Pedestrian road injuries                        | 2 (1 to 3) | 1 (0 to 2) | -34.7% (-42.2% to -28%)   |
| Zimbabwe | Physical violence by firearm                    | 0 (0 to 0) | 0 (0 to 0) | -4.8% (-15.7% to 6.1%)    |
| Zimbabwe | Physical violence by other means                | 0 (0 to 0) | 0 (0 to 0) | 2.8% (-5.7% to 13.7%)     |
| Zimbabwe | Physical violence by sharp object               | 0 (0 to 0) | 0 (0 to 0) | 9.2% (-2.1% to 22%)       |
| Zimbabwe | Poisoning by carbon monoxide                    | 0 (0 to 0) | 0 (0 to 0) | -10.6% (-19.5% to 0.5%)   |
| Zimbabwe | Poisoning by other means                        | 0 (0 to 0) | 0 (0 to 0) | -7.5% (-13.2% to -1.4%)   |
| Zimbabwe | Pulmonary aspiration and foreign body in airway | 0 (0 to 0) | 0 (0 to 0) | 10.7% (3% to 18.3%)       |
| Zimbabwe | Self-harm by firearm                            | 0 (0 to 0) | 0 (0 to 0) | 7.9% (-7.9% to 21.6%)     |
| Zimbabwe | Self-harm by other specified means              | 0 (0 to 0) | 0 (0 to 0) | 30.6% (24.3% to 37.1%)    |
| Zimbabwe | Unintentional firearm injuries                  | 0 (0 to 0) | 0 (0 to 0) | -5.8% (-12.8% to 1.9%)    |
| Zimbabwe | Venomous animal contact                         | 0 (0 to 0) | 0 (0 to 0) | 16.5% (8.6% to 25.3%)     |

Abbreviations: UI, uncertainty interval; NA, not applicable
